# Supplementary material
Source: PubMed Central journal article supplement (PMC3861733)

dbValid true MLMYKKR Oxidation\_M(1),PHOS(1) 1. 1066. -0.501545 5.40828 101. ? 3576.  
 S\_Acido\_new%gil68566984|gb|AAY79913.1| MLMYKKR%:::Oxidation\_M:PHOS:::%sample\_2%cmpd\_1925

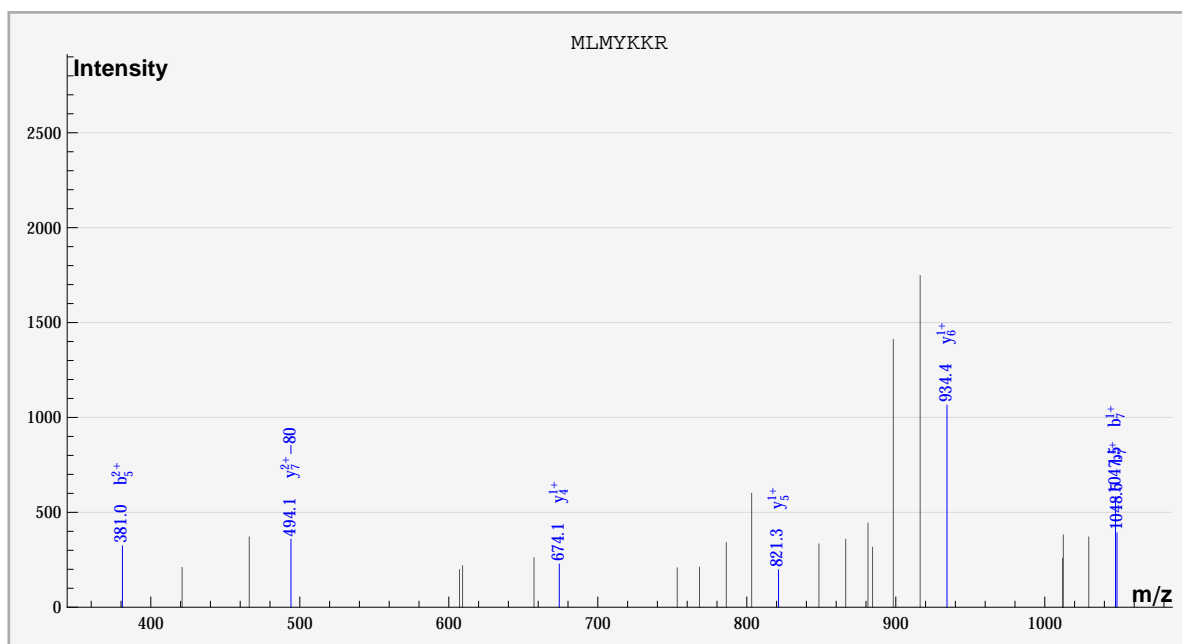

|   | # | b | b* | # | y | y* | P | P* |
|---|---|---|----|---|---|----|---|----|
| M | 1 |   |    |   |   |    |   | ✓  |
| L | 2 |   |    | 6 | ✓ |    |   |    |
| M | 3 |   |    | 5 | ✓ |    |   |    |
| Y | 4 |   |    | 4 | ✓ |    |   |    |
| K | 5 | ✓ |    | 3 |   |    |   |    |
| K | 6 |   |    | 2 |   |    |   |    |
| R | 7 | ✓ |    | 1 |   |    |   |    |

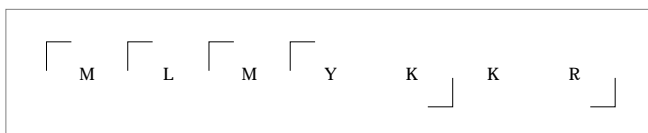

dbValid true MNQLSLSL PHOS(2) 1. 1066. -0.591305 5.40087 101. ? 3588.  
 S\_Acido\_new%gi|68567382|gb|AAY80311.1| MNQLSLSL%::::PHOS::PHOS::%sample\_2%compd\_1935

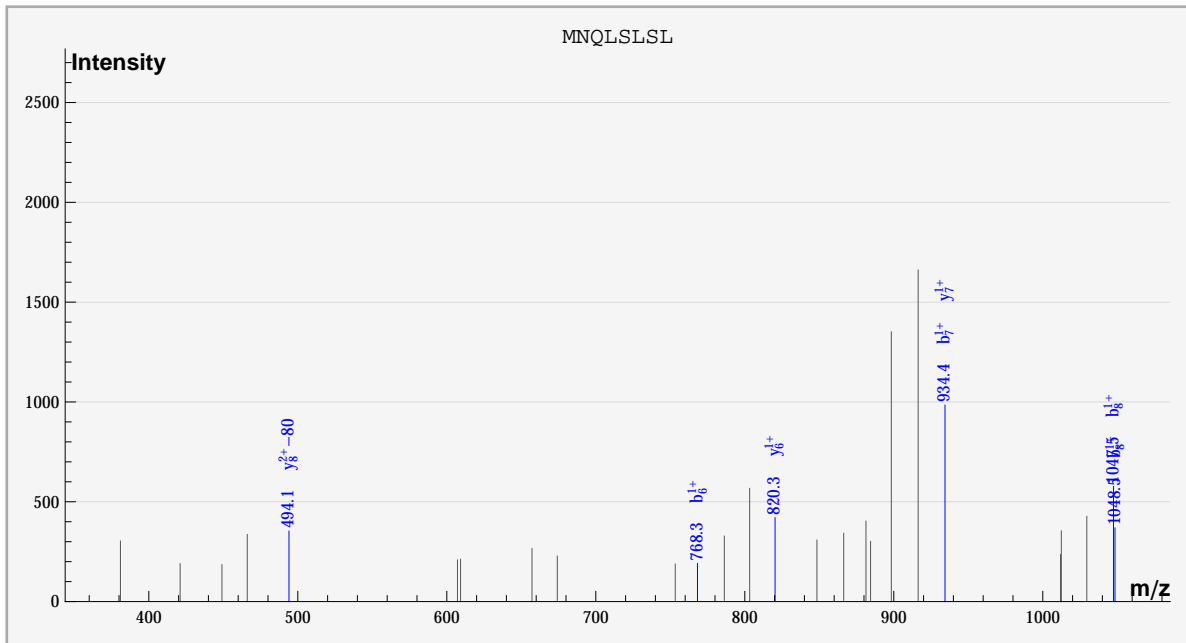

|   | # | b | b* | # | y | y* | P | P* |
|---|---|---|----|---|---|----|---|----|
| M | 1 |   |    |   |   |    |   | ✓  |
| N | 2 |   |    | 7 | ✓ |    |   |    |
| Q | 3 |   |    | 6 | ✓ |    |   |    |
| L | 4 |   |    | 5 |   |    |   |    |
| S | 5 |   |    | 4 |   |    |   |    |
| L | 6 | ✓ |    | 3 |   |    |   |    |
| S | 7 | ✓ |    | 2 |   |    |   |    |
| L | 8 | ✓ |    | 1 |   |    |   |    |

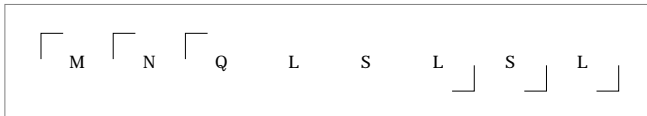

dbValid true MNQLSLSL PHOS(2) 1. 1066. -0.591305 5.3341 101. ? 3600.  
 S\_Acido\_new%gi|68567382|gb|AAY80311.1| MNQLSLSL%::::PHOS::PHOS::%sample\_2%cmpd\_1945

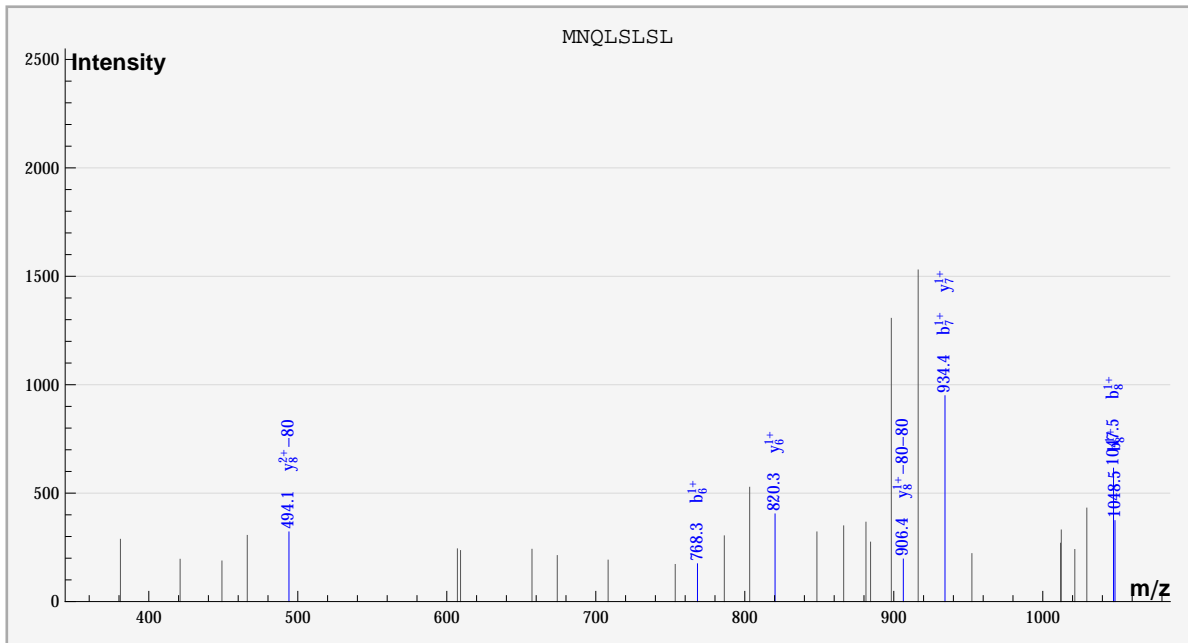

|   | # | b | b* | # | y | y* | P | P* |
|---|---|---|----|---|---|----|---|----|
| M | 1 |   |    |   |   |    |   | ✓  |
| N | 2 |   |    | 7 | ✓ |    |   |    |
| Q | 3 |   |    | 6 | ✓ |    |   |    |
| L | 4 |   |    | 5 |   |    |   |    |
| S | 5 |   |    | 4 |   |    |   |    |
| L | 6 | ✓ |    | 3 |   |    |   |    |
| S | 7 | ✓ |    | 2 |   |    |   |    |
| L | 8 | ✓ |    | 1 |   |    |   |    |



dbValid true MNQLSLSL PHOS(2) 1. 1066. -0.591305 5.42203 101. ? 3612.  
 S\_Acido\_new%gi|68567382|gb|AAY80311.1| MNQLSLSL%::::PHOS::PHOS::%sample\_2%cmpd\_1955

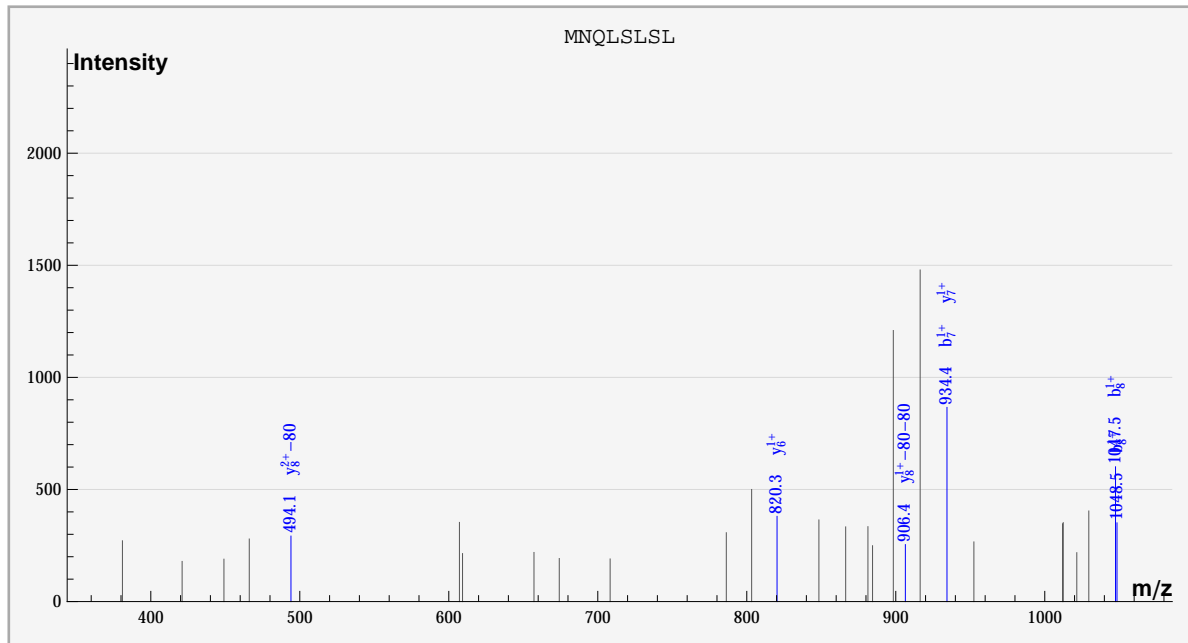

|   | # | b | b* | # | y | y* | P | P* |
|---|---|---|----|---|---|----|---|----|
| M | 1 |   |    |   |   |    |   | ✓  |
| N | 2 |   |    | 7 | ✓ |    |   |    |
| Q | 3 |   |    | 6 | ✓ |    |   |    |
| L | 4 |   |    | 5 |   |    |   |    |
| S | 5 |   |    | 4 |   |    |   |    |
| L | 6 |   |    | 3 |   |    |   |    |
| S | 7 | ✓ |    | 2 |   |    |   |    |
| L | 8 | ✓ |    | 1 |   |    |   |    |

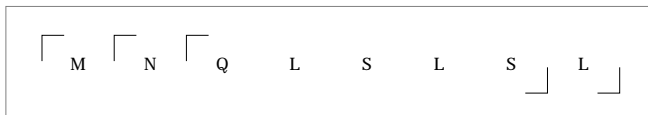

dbValid true MLYKKR Oxidation\_M(1),PHOS(1) 1. 1067. -1.50155 5.25189 101. ? 3516.  
 S\_Acido\_new%gii68566984|gb|AAY79913.1| MLYKKR%:::Oxidation\_M:PHOS:::%sample\_2%cmpd\_1875

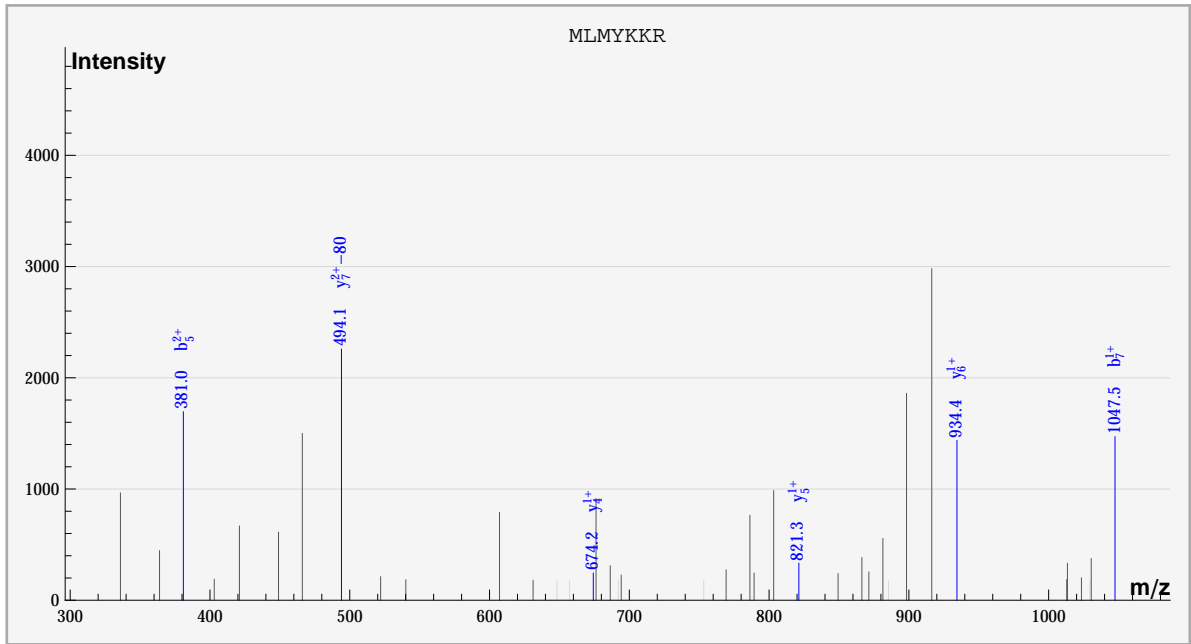

|   | # | b | b* | # | y | y* | P | P* |
|---|---|---|----|---|---|----|---|----|
| M | 1 |   |    |   |   |    |   | ✓  |
| L | 2 |   |    | 6 | ✓ |    |   |    |
| M | 3 |   |    | 5 | ✓ |    |   |    |
| Y | 4 |   |    | 4 | ✓ |    |   |    |
| K | 5 | ✓ |    | 3 |   |    |   |    |
| K | 6 |   |    | 2 |   |    |   |    |
| R | 7 | ✓ |    | 1 |   |    |   |    |

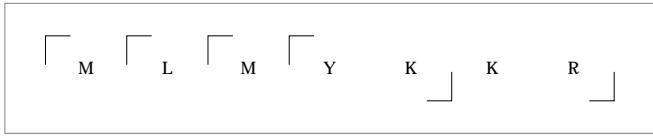

dbValid true MLMYKKR Oxidation\_M(1),PHOS(1) 1. 1067. -1.50155 5.22068 101. ? 3528.  
 S\_Acido\_new%gi|68566984|gb|AA79913.1| MLMYKKR%:::Oxidation\_M:PHOS:::%sample\_2%compd\_1885

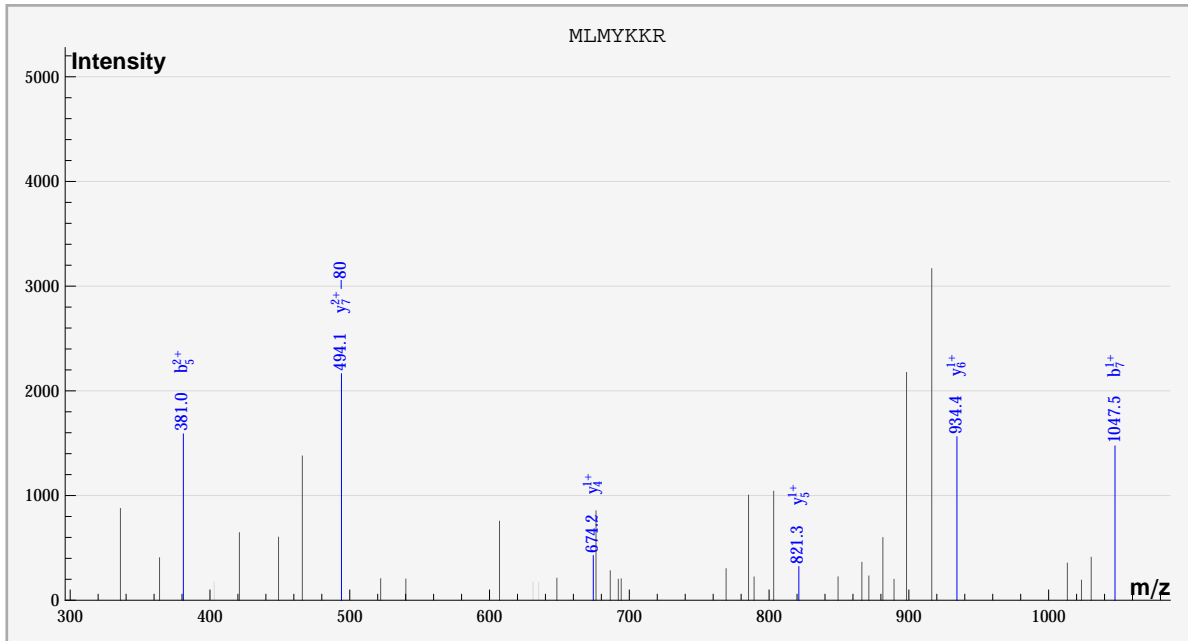

|   | # | b | b* | # | y | y* | P | P* |
|---|---|---|----|---|---|----|---|----|
| M | 1 |   |    |   |   |    |   | ✓  |
| L | 2 |   |    | 6 | ✓ |    |   |    |
| M | 3 |   |    | 5 | ✓ |    |   |    |
| Y | 4 |   |    | 4 | ✓ |    |   |    |
| K | 5 | ✓ |    | 3 |   |    |   |    |
| K | 6 |   |    | 2 |   |    |   |    |
| R | 7 | ✓ |    | 1 |   |    |   |    |

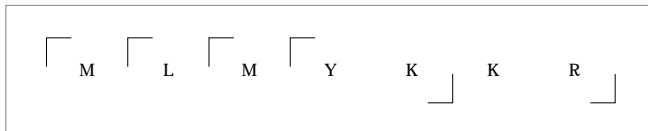

dbValid true MLYKRR Oxidation\_M(1),PHOS(1) 1. 1067. -1.50155 5.24748 101. ? 3540.  
 S\_Acido\_new%gi|68566984|gb|AA79913.1| MLYKRR%:::Oxidation\_M:PHOS:::%sample\_2%cmpd\_1896

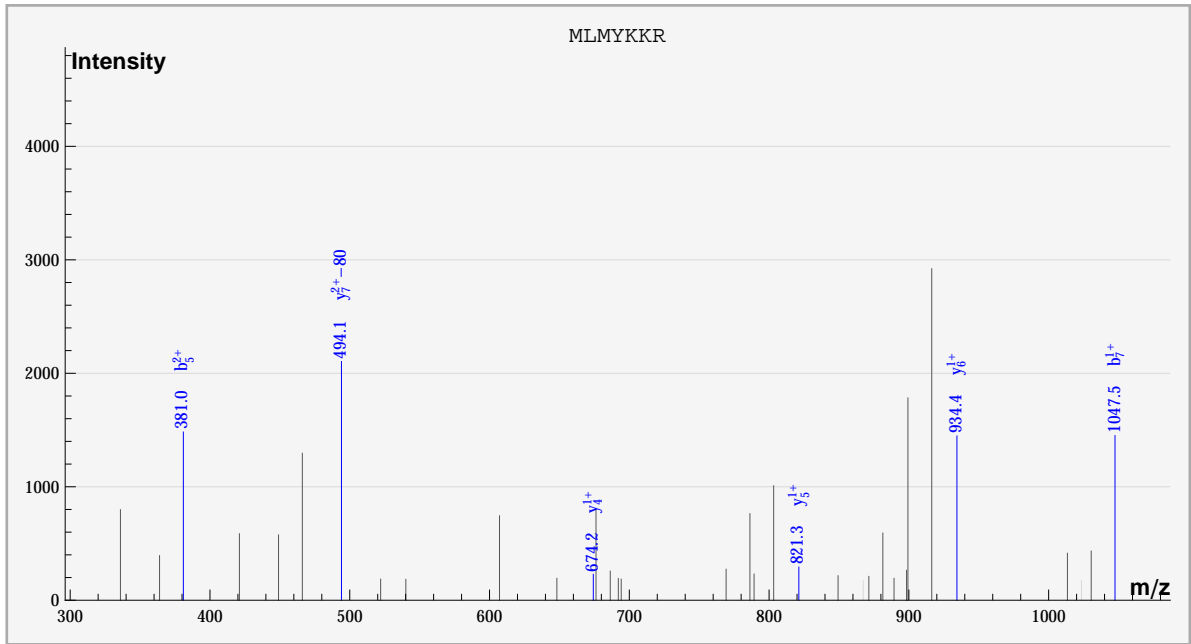

|   | # | b | b* | # | y | y* | P | P* |
|---|---|---|----|---|---|----|---|----|
| M | 1 |   |    |   |   |    |   | ✓  |
| L | 2 |   |    | 6 | ✓ |    |   |    |
| M | 3 |   |    | 5 | ✓ |    |   |    |
| Y | 4 |   |    | 4 | ✓ |    |   |    |
| K | 5 | ✓ |    | 3 |   |    |   |    |
| K | 6 |   |    | 2 |   |    |   |    |
| R | 7 | ✓ |    | 1 |   |    |   |    |

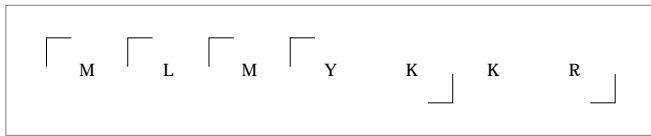



dbValid true MLMYKKR Oxidation\_M(1),PHOS(1) 1. 1067. -1.50155 5.27398 101. ? 3552.  
 S\_Acido\_new%gi|68566984|gb|AA79913.1| MLMYKKR%:::Oxidation\_M:PHOS:::%sample\_2%compd\_1906

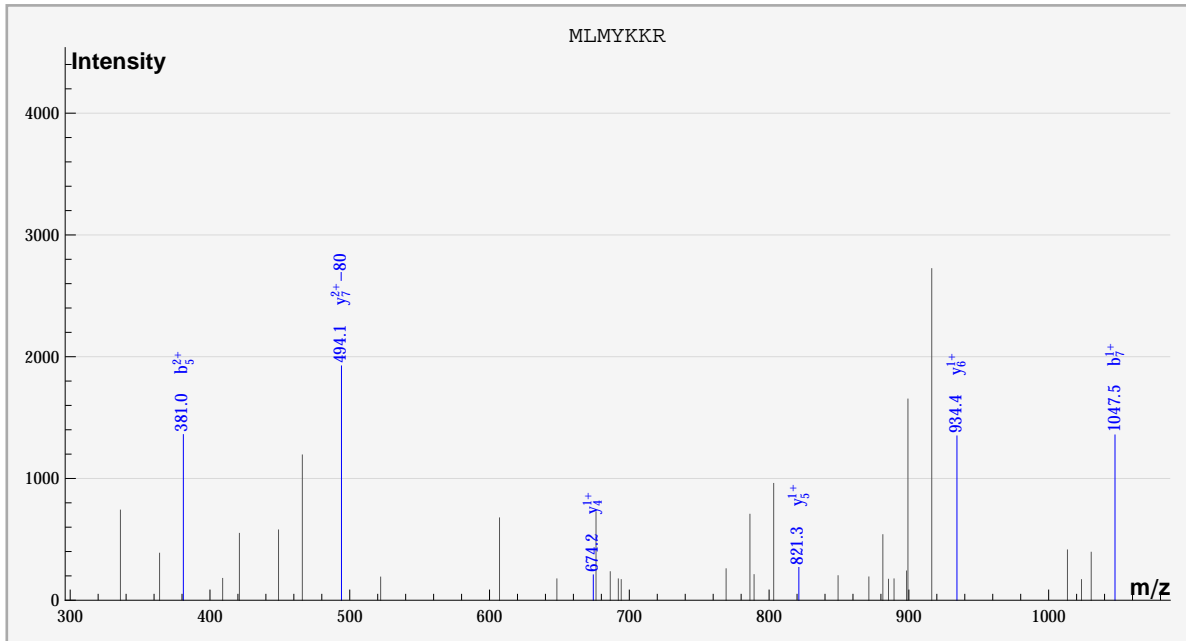

|   | # | b | b* | # | y | y* | P | P* |
|---|---|---|----|---|---|----|---|----|
| M | 1 |   |    |   |   |    |   | ✓  |
| L | 2 |   |    | 6 | ✓ |    |   |    |
| M | 3 |   |    | 5 | ✓ |    |   |    |
| Y | 4 |   |    | 4 | ✓ |    |   |    |
| K | 5 | ✓ |    | 3 |   |    |   |    |
| K | 6 |   |    | 2 |   |    |   |    |
| R | 7 | ✓ |    | 1 |   |    |   |    |

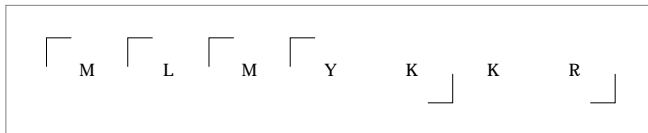

dbValid true MLYKKR Oxidation\_M(1),PHOS(1) 1. 1067. -1.50155 5.1349 101. ? 3564.  
 S\_Acido\_new%gi|68566984|gb|AA79913.1| MLYKKR%:::Oxidation\_M:PHOS:::%sample\_2%compd\_1916

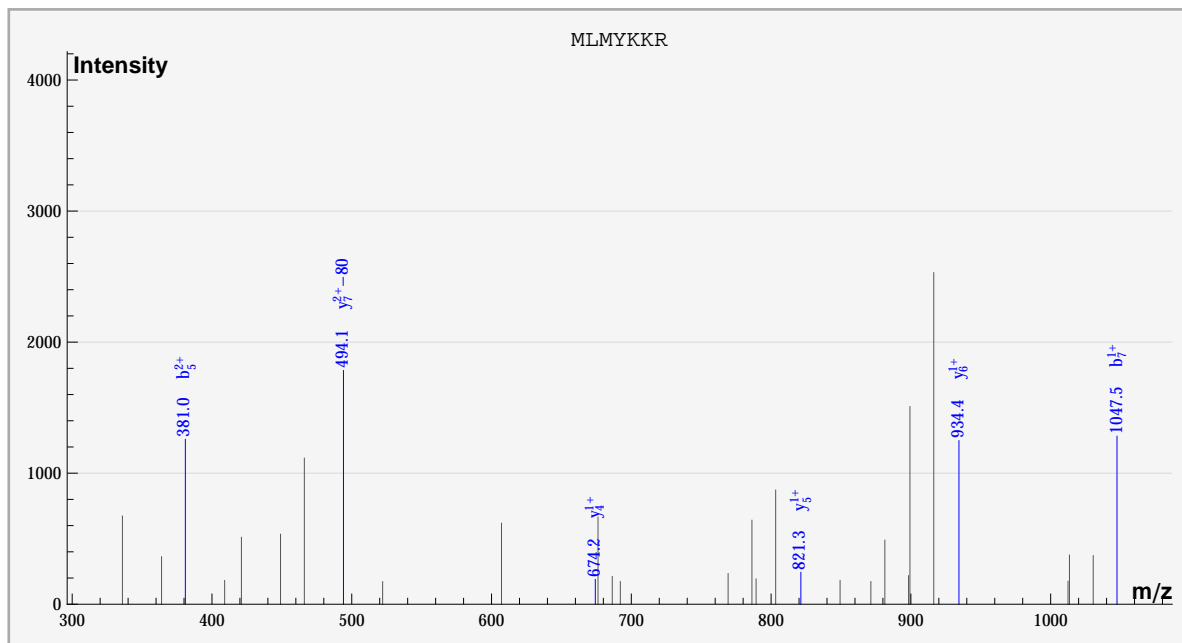

|   | # | b | b* | # | y | y* | P | P* |
|---|---|---|----|---|---|----|---|----|
| M | 1 |   |    |   |   |    |   | ✓  |
| L | 2 |   |    | 6 | ✓ |    |   |    |
| M | 3 |   |    | 5 | ✓ |    |   |    |
| Y | 4 |   |    | 4 | ✓ |    |   |    |
| K | 5 | ✓ |    | 3 |   |    |   |    |
| K | 6 |   |    | 2 |   |    |   |    |
| R | 7 | ✓ |    | 1 |   |    |   |    |

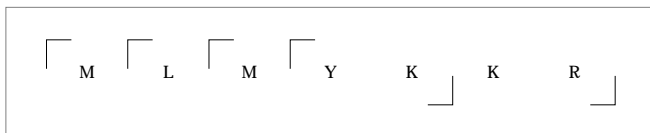

dbValid true MLYKRR Oxidation\_M(1),PHOS(1) 1. 1067. -1.50155 5.33858 101. ? 3576.  
 S\_Acido\_new%gii68566984|gb|AA79913.1| MLYKRR%:::Oxidation\_M:PHOS:::%sample\_2%cmpd\_1926

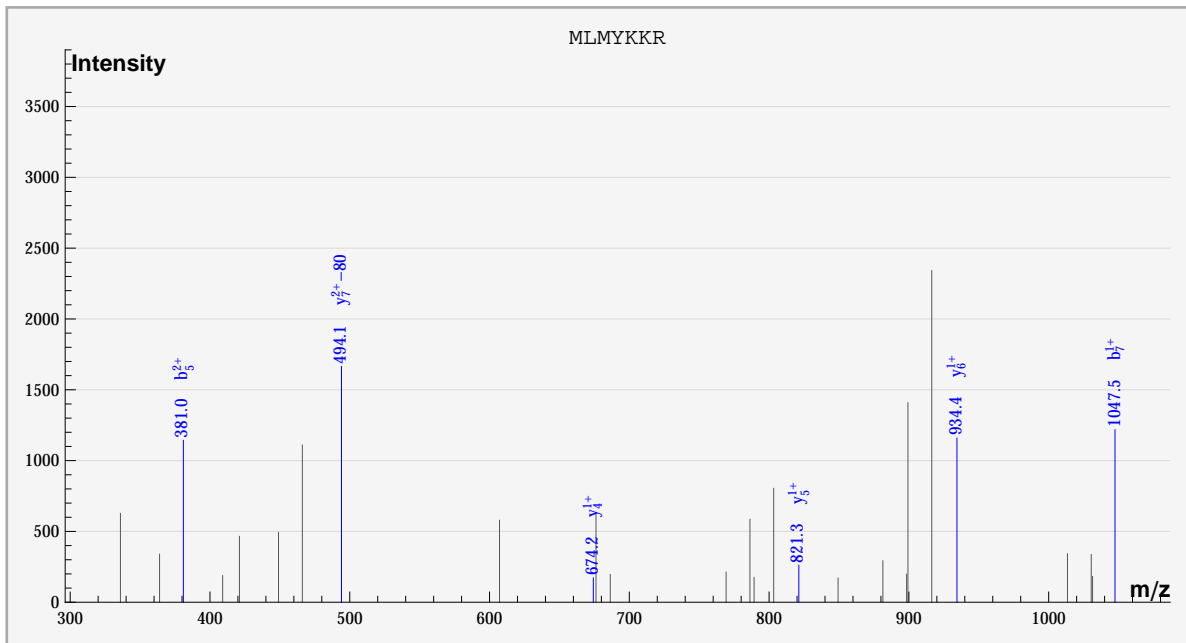

|   | # | b | b* | # | y | y* | P | P* |
|---|---|---|----|---|---|----|---|----|
| M | 1 |   |    |   |   |    |   | ✓  |
| L | 2 |   |    | 6 | ✓ |    |   |    |
| M | 3 |   |    | 5 | ✓ |    |   |    |
| Y | 4 |   |    | 4 | ✓ |    |   |    |
| K | 5 | ✓ |    | 3 |   |    |   |    |
| K | 6 |   |    | 2 |   |    |   |    |
| R | 7 | ✓ |    | 1 |   |    |   |    |

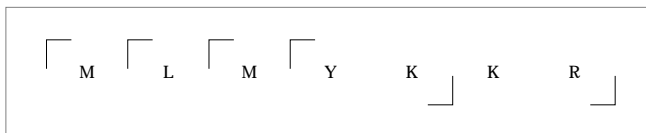

dbValid true EFRYNELVFLNQLQTR PHOS(2) 2. 1117. -1.49171 5.20822 101. ? 1440.  
 S\_Acido\_new%gi|68566987|gb|AA79916.1| EFRYNELVFLNQLQTR%:::PHOS:::PHOS::%sample\_1%compd\_179

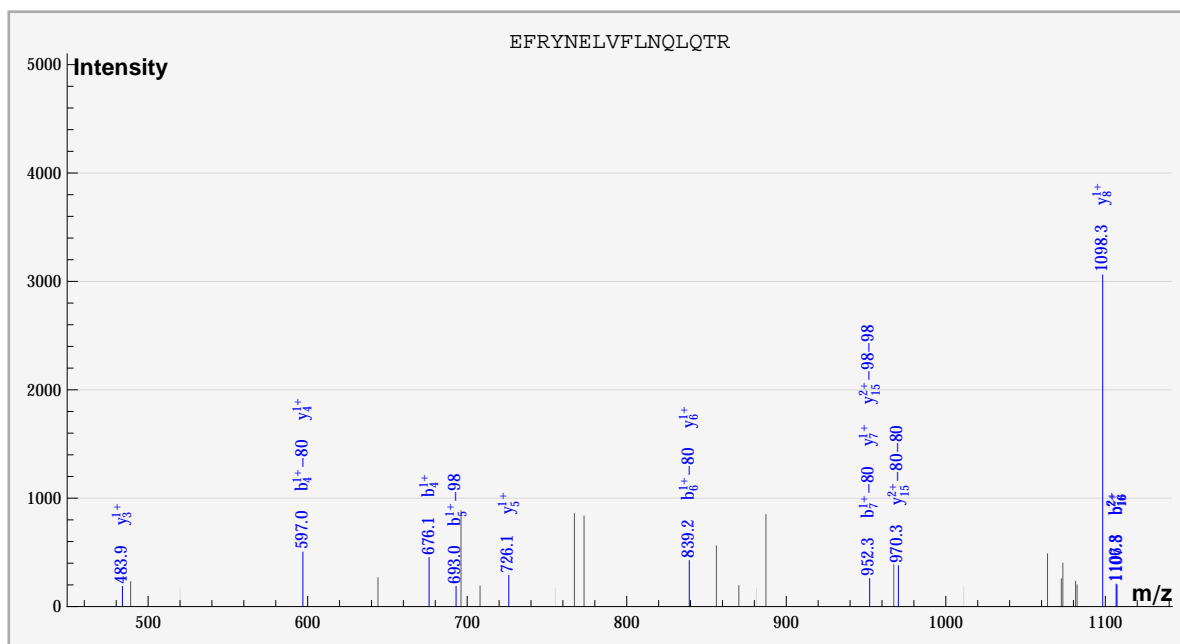

|   | #  | b | b* | #  | y | y* | P | P* |
|---|----|---|----|----|---|----|---|----|
| E | 1  |   |    |    |   |    |   |    |
| F | 2  |   |    | 15 |   | ✓  |   |    |
| R | 3  |   |    | 14 |   |    |   |    |
| Y | 4  | ✓ | ✓  | 13 |   |    |   |    |
| N | 5  |   | ✓  | 12 |   |    |   |    |
| E | 6  |   | ✓  | 11 |   |    |   |    |
| L | 7  |   | ✓  | 10 |   |    |   |    |
| V | 8  |   |    | 9  |   |    |   |    |
| F | 9  |   |    | 8  | ✓ |    |   |    |
| L | 10 |   |    | 7  | ✓ |    |   |    |
| N | 11 |   |    | 6  | ✓ |    |   |    |
| Q | 12 |   |    | 5  | ✓ |    |   |    |
| L | 13 |   |    | 4  | ✓ |    |   |    |
| Q | 14 |   |    | 3  | ✓ |    |   |    |
| T | 15 |   |    | 2  |   |    |   |    |
| R | 16 | ✓ |    | 1  |   |    |   |    |

E [ F R Y ] N ] E ] L ] V [ F [ L [ N [ Q [ L [ Q T R ]

dbValid true EFRYNELVFLNQLQTR PHOS(2) 2. 1117. -1.49171 5.55276 101. ? 1452.  
 S\_Acido\_new%gi|68566987|gb|AA79916.1| EFRYNELVFLNQLQTR%::::PHOS:::::PHOS::%sample\_1%compd\_189

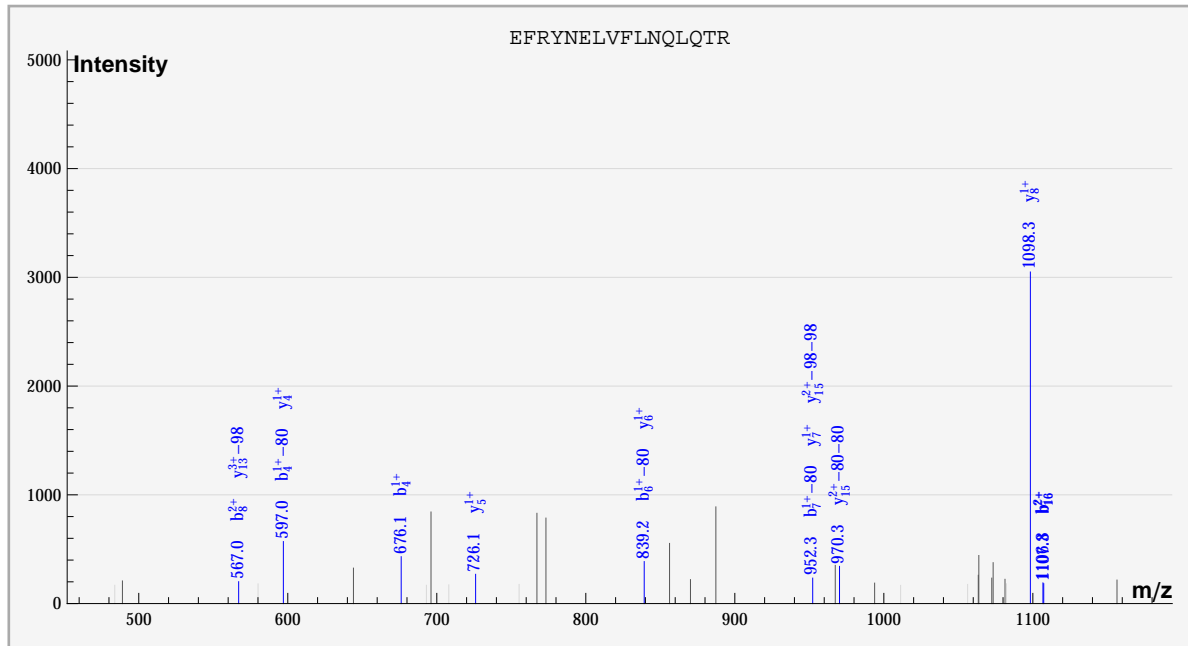

|   | #  | b | b* | #  | y | y* | P | P* |
|---|----|---|----|----|---|----|---|----|
| E | 1  |   |    |    |   |    |   |    |
| F | 2  |   |    | 15 |   | ✓  |   |    |
| R | 3  |   |    | 14 |   |    |   |    |
| Y | 4  | ✓ | ✓  | 13 |   | ✓  |   |    |
| N | 5  |   |    | 12 |   |    |   |    |
| E | 6  |   | ✓  | 11 |   |    |   |    |
| L | 7  |   | ✓  | 10 |   |    |   |    |
| V | 8  | ✓ |    | 9  |   |    |   |    |
| F | 9  |   |    | 8  |   | ✓  |   |    |
| L | 10 |   |    | 7  |   | ✓  |   |    |
| N | 11 |   |    | 6  |   | ✓  |   |    |
| Q | 12 |   |    | 5  |   | ✓  |   |    |
| L | 13 |   |    | 4  |   | ✓  |   |    |
| Q | 14 |   |    | 3  |   |    |   |    |
| T | 15 |   |    | 2  |   |    |   |    |
| R | 16 | ✓ |    | 1  |   |    |   |    |

E F R Y N E L V F L N Q L Q T R

dbValid true YWKIVNLK PHOS(1) 1. 1145. -1.40383 5.17249 101. ? 2136.  
 S\_Acido\_new%gi|68568539|gb|AAY81468.1| YWKIVNLK%:PHOS:::sample\_3%cmpd\_753

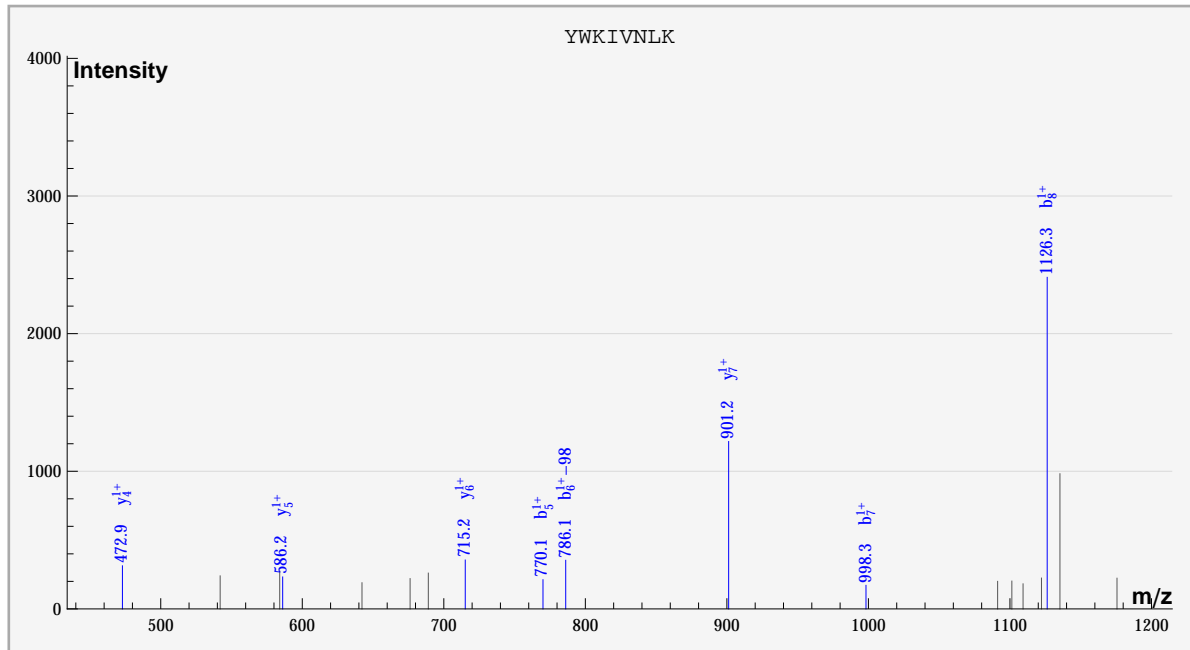

|   | # | b | b* | # | y | y* | P | P* |
|---|---|---|----|---|---|----|---|----|
| Y | 1 |   |    |   |   |    |   |    |
| W | 2 |   |    | 7 |   | ✓  |   |    |
| K | 3 |   |    | 6 |   | ✓  |   |    |
| I | 4 |   |    | 5 |   | ✓  |   |    |
| V | 5 | ✓ |    | 4 |   | ✓  |   |    |
| N | 6 |   | ✓  | 3 |   |    |   |    |
| L | 7 | ✓ |    | 2 |   |    |   |    |
| K | 8 | ✓ |    | 1 |   |    |   |    |

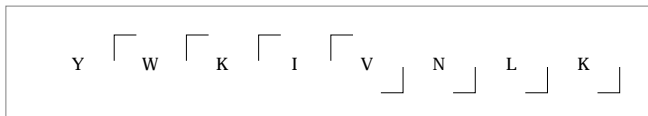

dbValid true DYYIAR PHOS(1) 2. 441.22 -0.536343 5.28287 100. ?  
 1296. S\_Acido\_new%gi|68566641|gb|AAY79570.1| DYYIAR%::PHOS::::%sample\_1%compd\_88

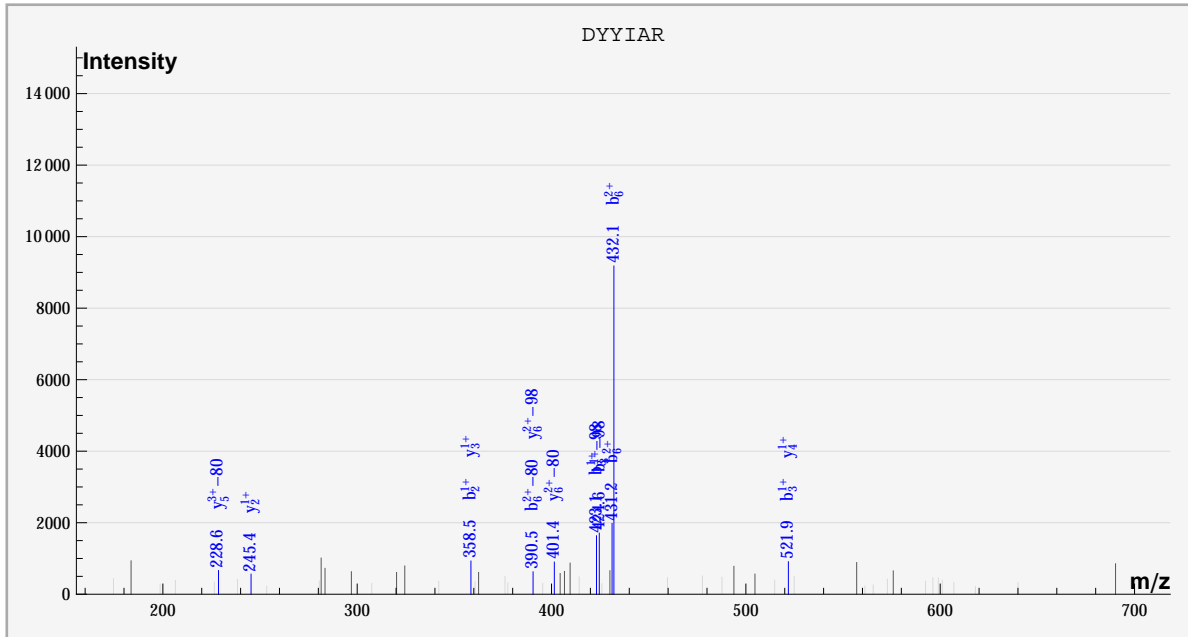

|   | # | b | b* | # | y | y* | P | P* |
|---|---|---|----|---|---|----|---|----|
| D | 1 |   |    |   |   |    |   | ✓  |
| Y | 2 | ✓ |    | 5 |   | ✓  |   |    |
| Y | 3 | ✓ | ✓  | 4 | ✓ |    |   |    |
| I | 4 |   |    | 3 | ✓ |    |   |    |
| A | 5 |   |    | 2 | ✓ |    |   |    |
| R | 6 | ✓ | ✓  | 1 |   |    |   |    |

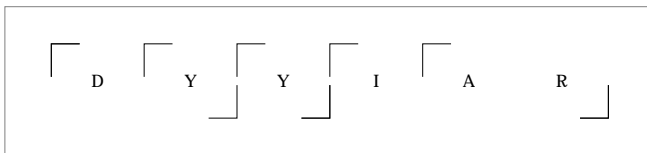

dbValid true YLNFMK PHOS(1) 2. 449. -0.807193 5.00119 100. ? 1326.  
 S\_Acido\_new%gi|68567490|gb|AAY80419.1| S\_Acido\_new%gi|68568619|gb|AAY81548.1|  
 YLNFMK%:PHOS:::sample\_2%compd\_98

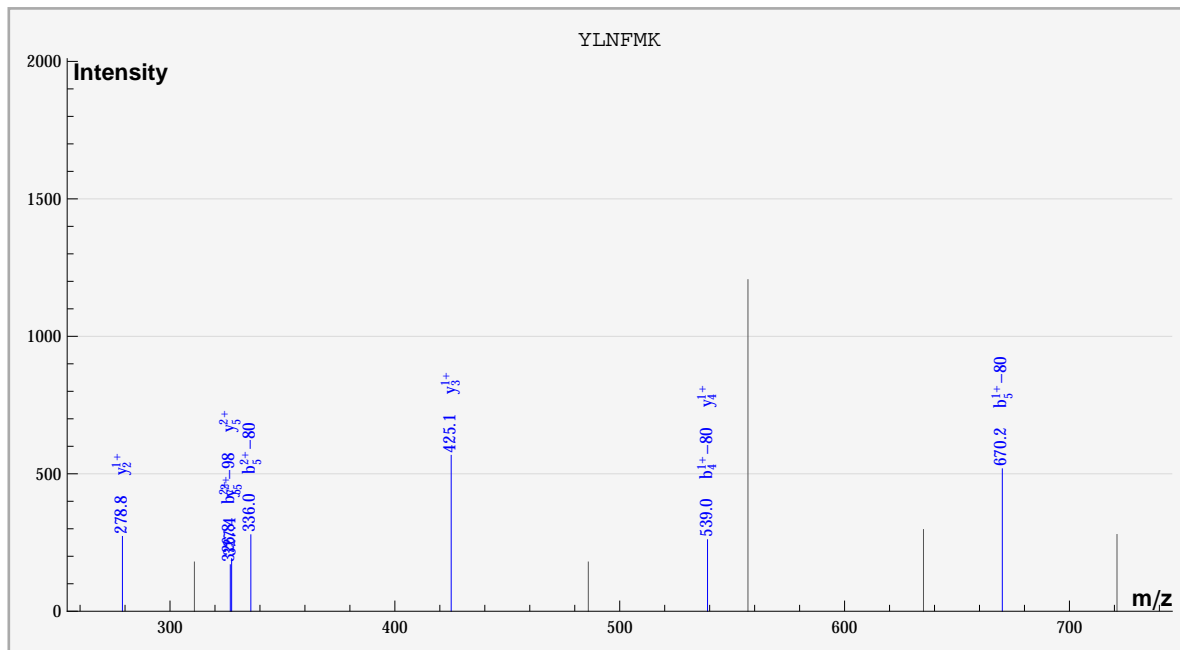

|   | # | b | b* | # | y | y* | P | P* |
|---|---|---|----|---|---|----|---|----|
| Y | 1 |   |    |   |   |    |   |    |
| L | 2 |   |    | 5 | ✓ |    |   |    |
| N | 3 |   |    | 4 | ✓ |    |   |    |
| F | 4 | ✓ |    | 3 | ✓ |    |   |    |
| M | 5 | ✓ |    | 2 | ✓ |    |   |    |
| K | 6 |   |    | 1 |   |    |   |    |

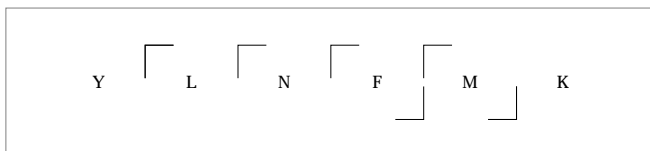



dbValid true YLNFMK PHOS(1) 2. 449. -0.807193 5.18993 100. ? 1344.  
 S\_Acido\_new%gi|68567490|gb|AAY80419.1| S\_Acido\_new%gi|68568619|gb|AAY81548.1|  
 YLNFMK%:PHOS:::sample\_2%compd\_108

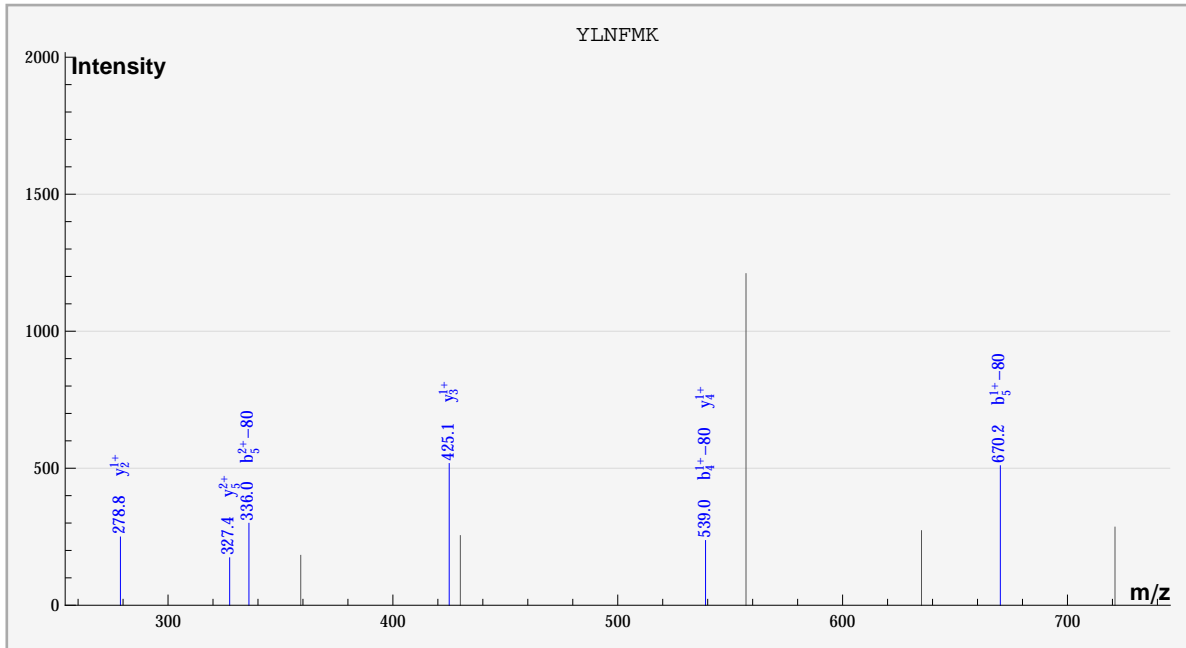

|   | # | b | b* | # | y | y* | P | P* |
|---|---|---|----|---|---|----|---|----|
| Y | 1 |   |    |   |   |    |   |    |
| L | 2 |   |    | 5 | ✓ |    |   |    |
| N | 3 |   |    | 4 | ✓ |    |   |    |
| F | 4 | ✓ |    | 3 | ✓ |    |   |    |
| M | 5 | ✓ |    | 2 | ✓ |    |   |    |
| K | 6 |   |    | 1 |   |    |   |    |

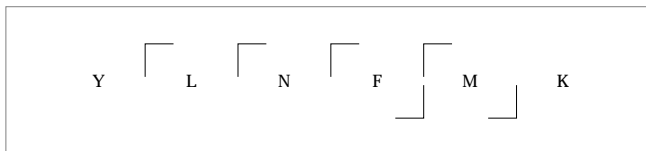

dbValid true YLNFMK PHOS(1) 2. 449. -0.807193 5.34438 100. ? 1356.  
 S\_Acido\_new%gi|68567490|gb|AAY80419.1| S\_Acido\_new%gi|68568619|gb|AAY81548.1|  
 YLNFMK%:PHOS:::sample\_2%compd\_118

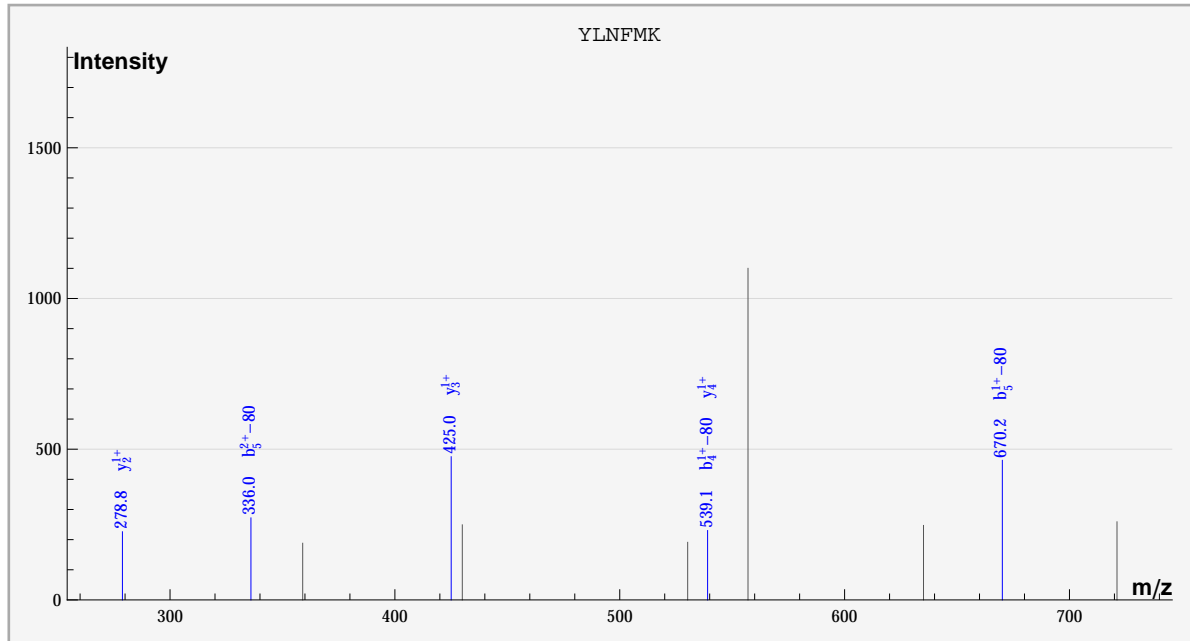

|   | # | b | b* | # | y | y* | P | P* |
|---|---|---|----|---|---|----|---|----|
| Y | 1 |   |    |   |   |    |   |    |
| L | 2 |   |    | 5 |   |    |   |    |
| N | 3 |   |    | 4 | ✓ |    |   |    |
| F | 4 | ✓ |    | 3 | ✓ |    |   |    |
| M | 5 | ✓ |    | 2 | ✓ |    |   |    |
| K | 6 |   |    | 1 |   |    |   |    |

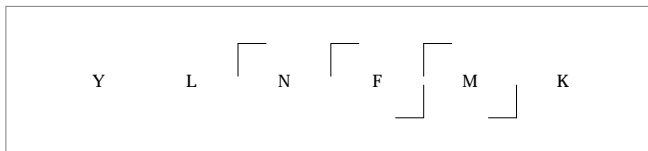

dbValid true KVVYSIR PHOS(1) 2. 474. -1.24813 4.90084 100. ? 1878.  
 S\_Acido\_new%gi|68568321|gb|AAY81250.1| KVVYSIR%::::PHOS::::%sample\_2%cmpd\_572

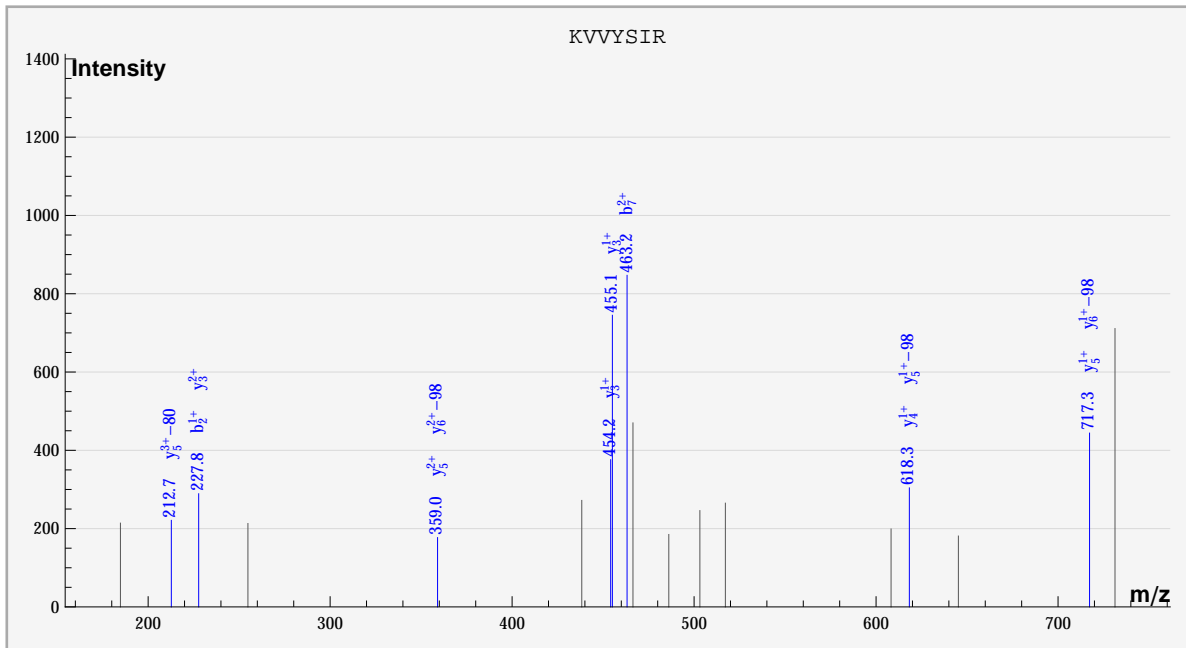

|   | # | b | b* | # | y | y* | P | P* |
|---|---|---|----|---|---|----|---|----|
| K | 1 |   |    |   |   |    |   |    |
| V | 2 | ✓ |    | 6 |   | ✓  |   |    |
| V | 3 |   |    | 5 | ✓ | ✓  |   |    |
| Y | 4 |   |    | 4 | ✓ |    |   |    |
| S | 5 |   |    | 3 | ✓ |    |   |    |
| I | 6 |   |    | 2 |   |    |   |    |
| R | 7 | ✓ |    | 1 |   |    |   |    |

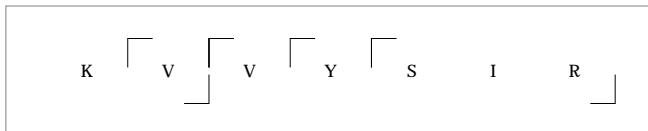

dbValid true KVVYSIR PHOS(1) 2. 474. -1.24813 4.97432 100. ? 1890.  
 S\_Acido\_new%gi|68568321|gb|AAY81250.1| KVVYSIR%::::PHOS::::sample\_2%cmpd\_582

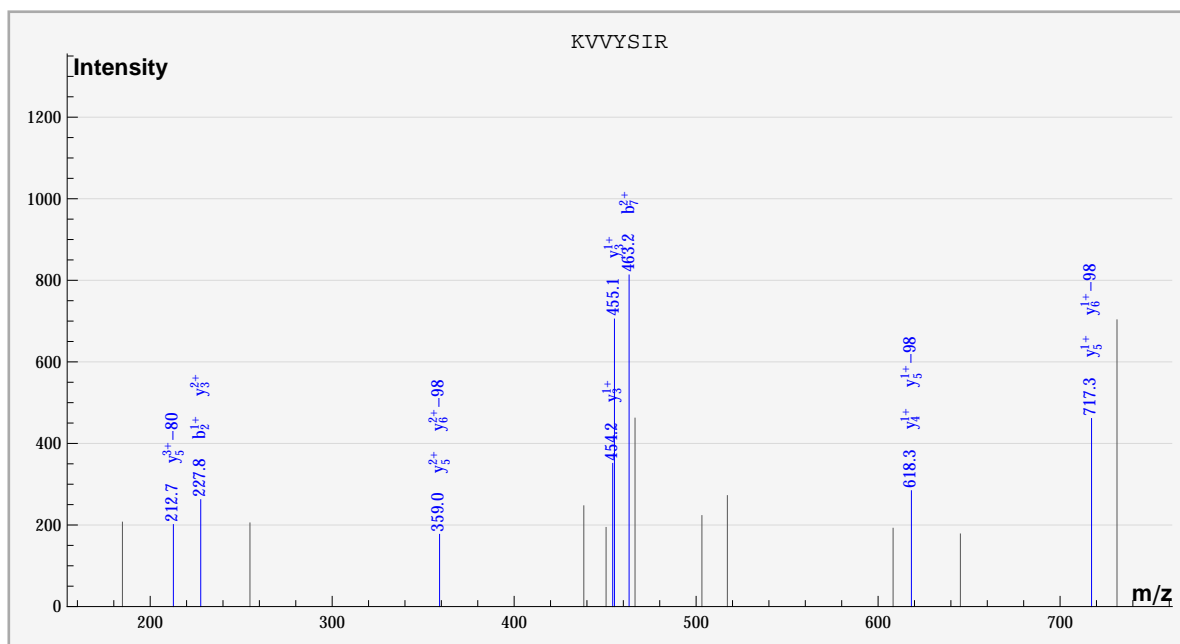

|   | # | b | b* | # | y | y* | P | P* |
|---|---|---|----|---|---|----|---|----|
| K | 1 |   |    |   |   |    |   |    |
| V | 2 | ✓ |    | 6 |   | ✓  |   |    |
| V | 3 |   |    | 5 | ✓ | ✓  |   |    |
| Y | 4 |   |    | 4 | ✓ |    |   |    |
| S | 5 |   |    | 3 | ✓ |    |   |    |
| I | 6 |   |    | 2 |   |    |   |    |
| R | 7 | ✓ |    | 1 |   |    |   |    |

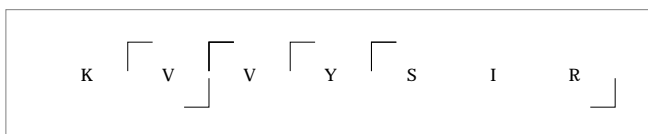

dbValid true ILIDYAR PHOS(1) 2. 474. -1.76395 5.33183 100. ? 2028.  
 S\_Acido\_new%gi|68567076|gb|AAY80005.1| ILIDYAR%::::PHOS:::sample\_2%compd\_695

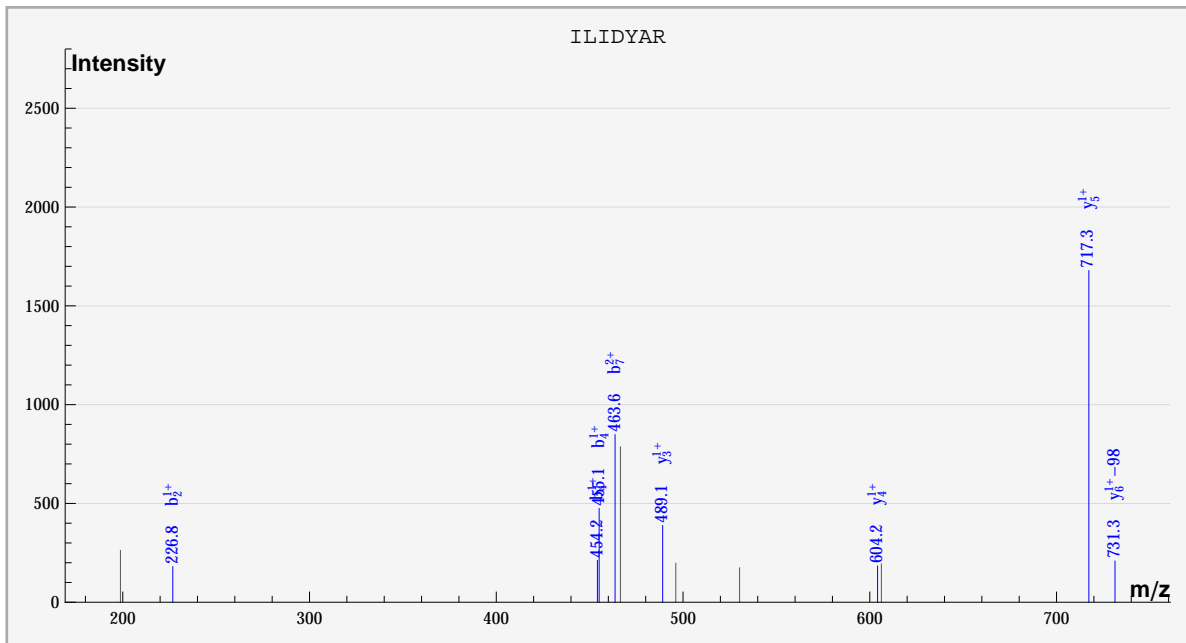

|   | # | b | b* | # | y | y* | P | P* |
|---|---|---|----|---|---|----|---|----|
| I | 1 |   |    |   |   |    |   |    |
| L | 2 | ✓ |    | 6 |   | ✓  |   |    |
| I | 3 |   |    | 5 | ✓ |    |   |    |
| D | 4 | ✓ |    | 4 | ✓ |    |   |    |
| Y | 5 |   |    | 3 | ✓ |    |   |    |
| A | 6 |   |    | 2 |   |    |   |    |
| R | 7 | ✓ |    | 1 |   |    |   |    |

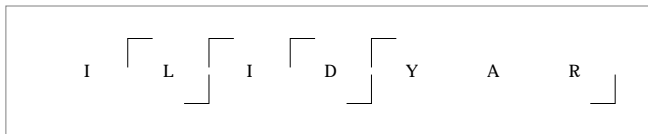

dbValid true RYSITR PHOS(2) 2. 477.98 0.213527 4.99358 100. ? 1398.  
 S\_Acido\_new%gi|68566621|gb|AAY79550.1| RYSITR%:::PHOS::PHOS::%sample\_1%cmpd\_159

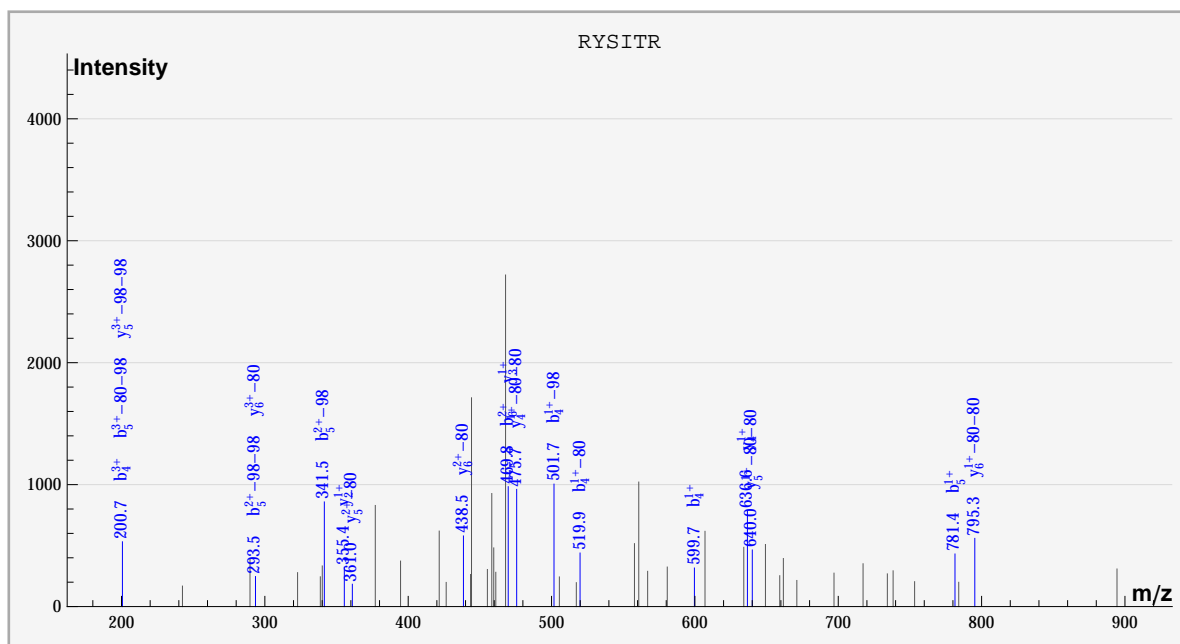

|   | # | b | b* | # | y | y* | P | P* |
|---|---|---|----|---|---|----|---|----|
| R | 1 |   |    |   |   |    |   | ✓  |
| Y | 2 |   |    | 5 |   | ✓  |   |    |
| S | 3 |   |    | 4 | ✓ | ✓  |   |    |
| I | 4 | ✓ | ✓  | 3 | ✓ |    |   |    |
| T | 5 | ✓ | ✓  | 2 | ✓ |    |   |    |
| R | 6 | ✓ |    | 1 |   |    |   |    |

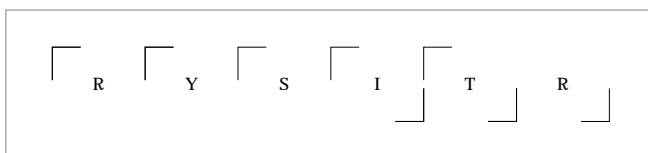

dbValid true DSLILVGR PHOS(1) 2. 478. -1.25322 5.15089 100. ? 2766.  
 S\_Acido\_new%gi|68568363|gb|AAY81292.1| DSLILVGR::PHOS:::sample\_2%compd\_1338

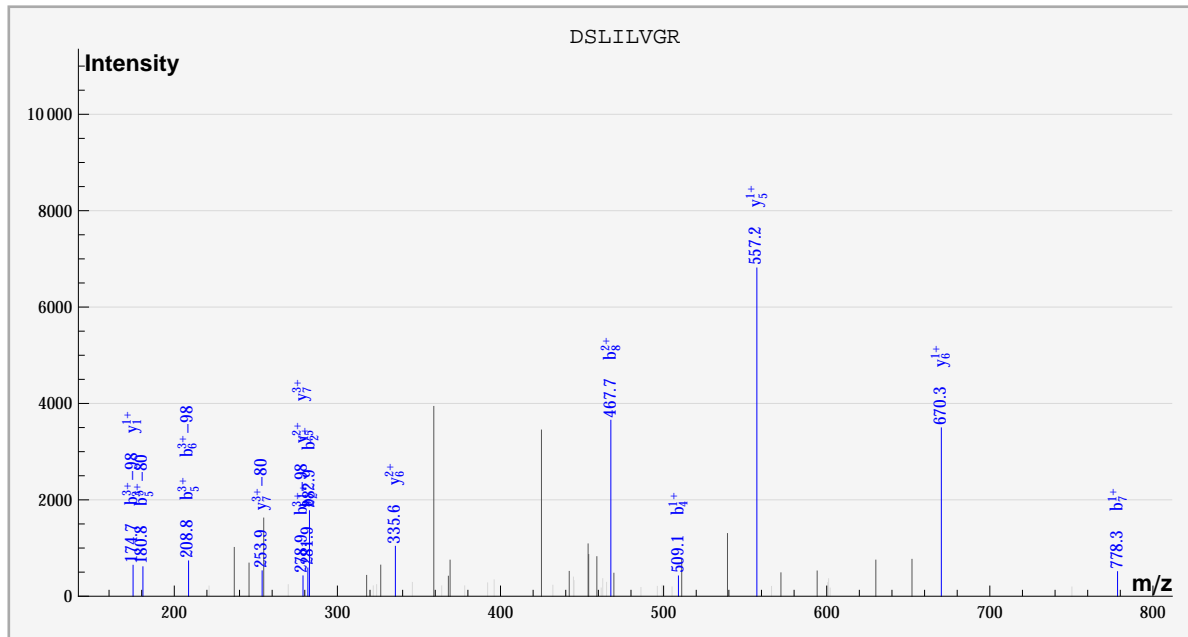

|   | # | b | b* | # | y | y* | P | P* |
|---|---|---|----|---|---|----|---|----|
| D | 1 |   |    |   |   |    |   |    |
| S | 2 | ✓ |    | 7 | ✓ | ✓  |   |    |
| L | 3 |   |    | 6 | ✓ |    |   |    |
| I | 4 | ✓ |    | 5 | ✓ |    |   |    |
| L | 5 | ✓ | ✓  | 4 |   |    |   |    |
| V | 6 |   | ✓  | 3 |   |    |   |    |
| G | 7 | ✓ |    | 2 |   |    |   |    |
| R | 8 | ✓ | ✓  | 1 | ✓ |    |   |    |

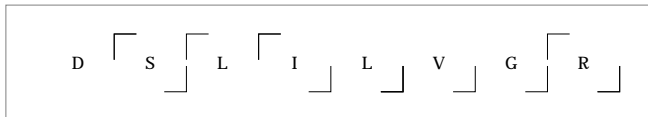

dbValid true DSLILVGR PHOS(1) 2. 478. -1.25322 4.95859 100. ? 2778.  
 S\_Acido\_new%gi|68568363|gb|AAY81292.1| DSLILVGR%::PHOS:::sample\_2%compd\_1350

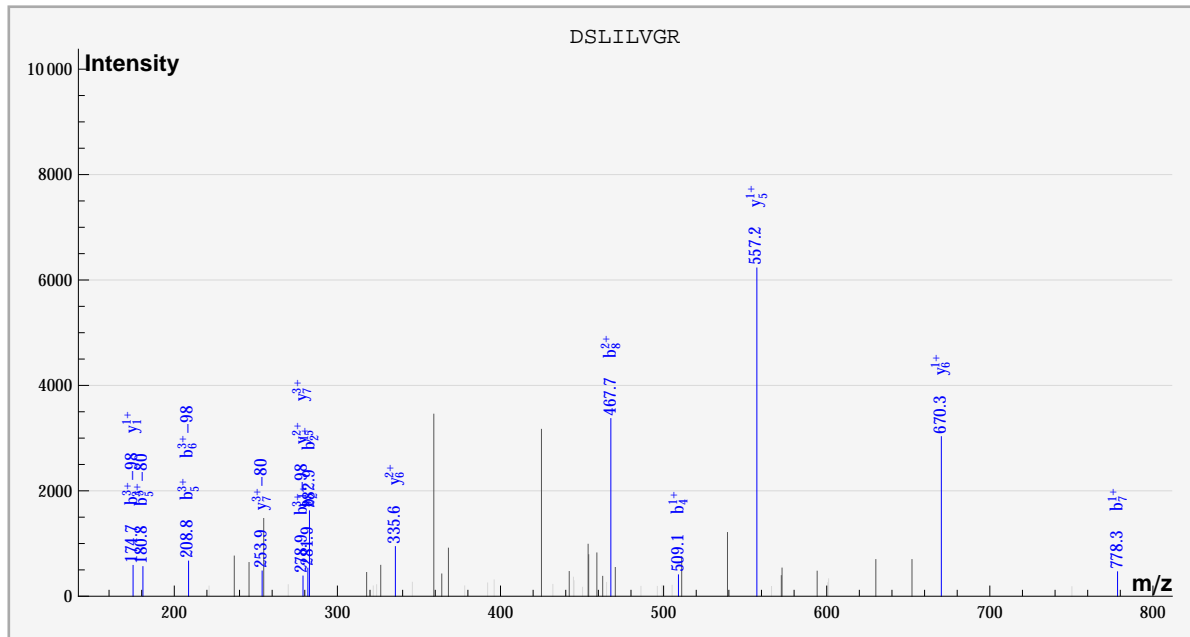

|   | # | b | b* | # | y | y* | P | P* |
|---|---|---|----|---|---|----|---|----|
| D | 1 |   |    |   |   |    |   |    |
| S | 2 | ✓ |    | 7 | ✓ | ✓  |   |    |
| L | 3 |   |    | 6 | ✓ |    |   |    |
| I | 4 | ✓ |    | 5 | ✓ |    |   |    |
| L | 5 | ✓ | ✓  | 4 |   |    |   |    |
| V | 6 |   | ✓  | 3 |   |    |   |    |
| G | 7 | ✓ |    | 2 |   |    |   |    |
| R | 8 | ✓ | ✓  | 1 | ✓ |    |   |    |





dbValid true DSLILVGR PHOS(1) 2. 478. -1.25322 5.14655 100. ? 2796.  
 S\_Acido\_new%gi|68568363|gb|AAY81292.1| DSLILVGR%::PHOS:::sample\_2%compd\_1360

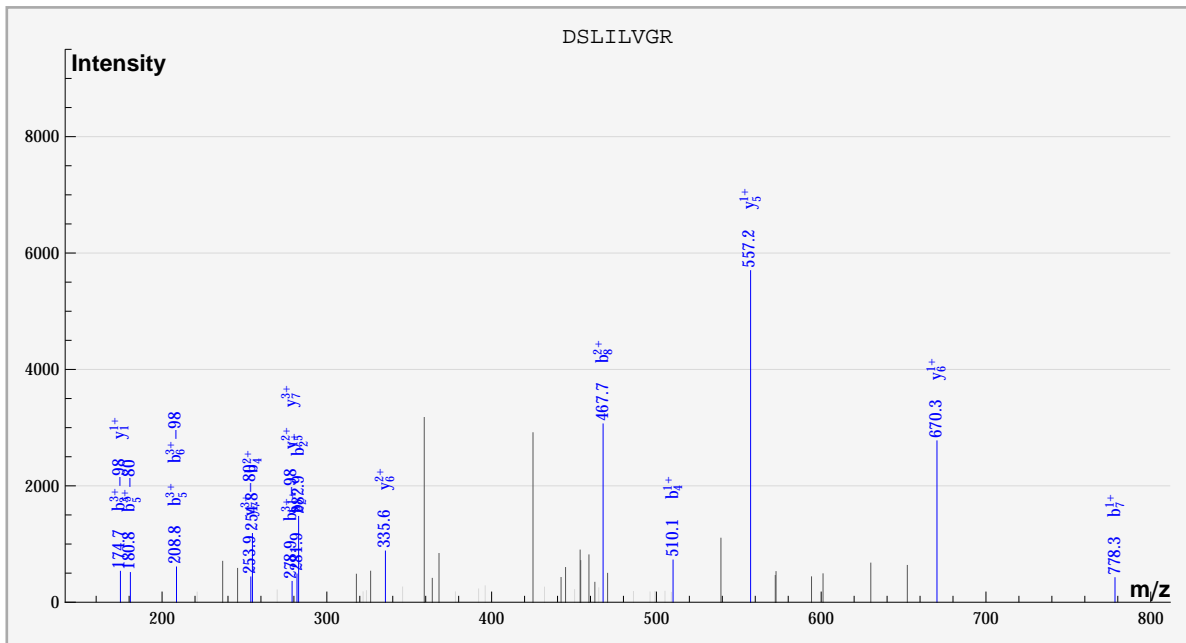

|   | # | b | b* | # | y | y* | P | P* |
|---|---|---|----|---|---|----|---|----|
| D | 1 |   |    |   |   |    |   |    |
| S | 2 | ✓ |    | 7 | ✓ | ✓  |   |    |
| L | 3 |   |    | 6 | ✓ |    |   |    |
| I | 4 | ✓ |    | 5 | ✓ |    |   |    |
| L | 5 | ✓ | ✓  | 4 |   |    |   |    |
| V | 6 |   | ✓  | 3 |   |    |   |    |
| G | 7 | ✓ |    | 2 |   |    |   |    |
| R | 8 | ✓ | ✓  | 1 | ✓ |    |   |    |

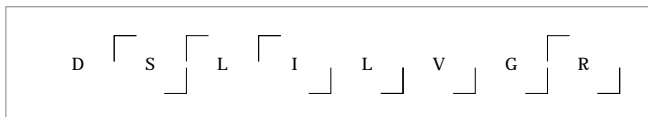

dbValid true DYIQLVK PHOS(1) 2. 478. 1.73589 5.08698 100. ? 2856.

S\_Acido\_new%gi|68566703|gb|AAY79632.1| DYIQLVK%::PHOS:::sample\_2%cmpd\_1411

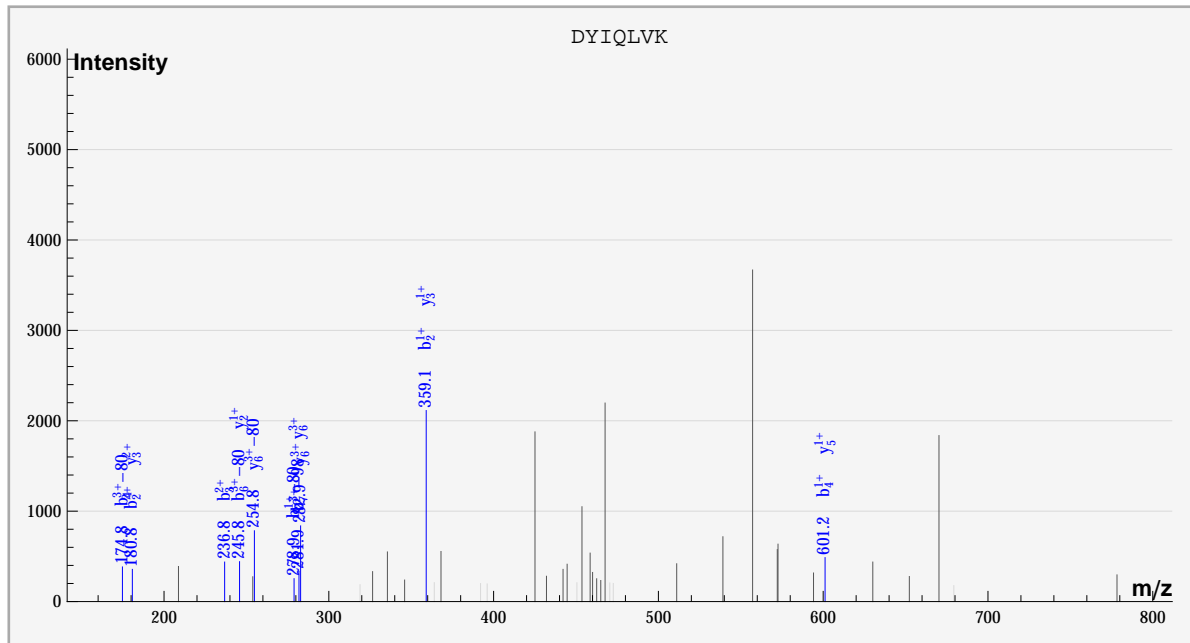

|   | # | b | b* | # | y | y* | P | P* |
|---|---|---|----|---|---|----|---|----|
| D | 1 |   |    |   |   |    |   |    |
| Y | 2 | ✓ | ✓  | 6 | ✓ | ✓  |   |    |
| I | 3 | ✓ |    | 5 | ✓ |    |   |    |
| Q | 4 | ✓ | ✓  | 4 |   |    |   |    |
| L | 5 |   |    | 3 | ✓ |    |   |    |
| V | 6 |   | ✓  | 2 | ✓ |    |   |    |
| K | 7 |   | ✓  | 1 |   |    |   |    |

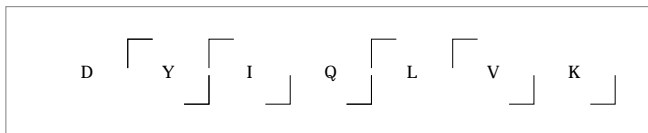

dbValid true DYIQLVK PHOS(1) 2. 478. 1.73589 5.26552 100. ? 2868.

S\_Acido\_new%gi|68566703|gb|AAY79632.1| DYIQLVK%::PHOS:::::sample\_2%cmpd\_1421

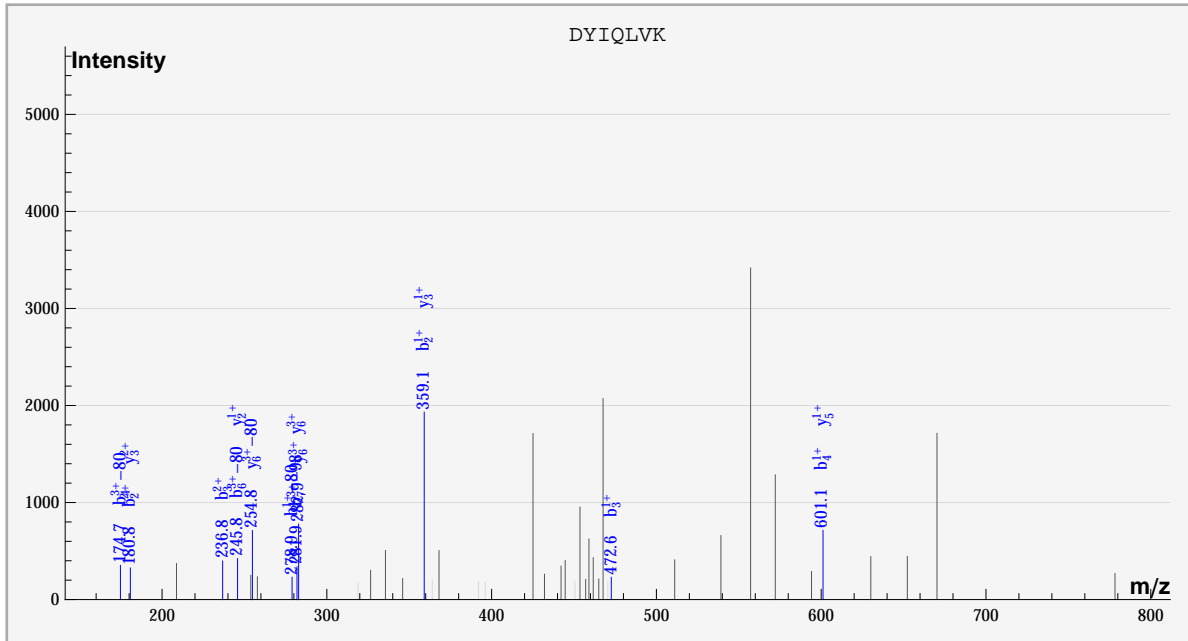

|   | # | b | b* | # | y | y* | P | P* |
|---|---|---|----|---|---|----|---|----|
| D | 1 |   |    |   |   |    |   |    |
| Y | 2 | ✓ | ✓  | 6 | ✓ | ✓  |   |    |
| I | 3 | ✓ |    | 5 | ✓ |    |   |    |
| Q | 4 | ✓ | ✓  | 4 |   |    |   |    |
| L | 5 |   |    | 3 | ✓ |    |   |    |
| V | 6 |   | ✓  | 2 | ✓ |    |   |    |
| K | 7 |   | ✓  | 1 |   |    |   |    |

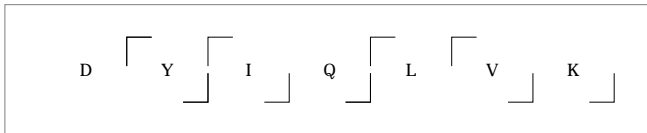

dbValid true DYIQLVK PHOS(1) 2. 478. 1.73589 5.55024 100. ? 2880.

S\_Acido\_new%gi|68566703|gb|AAY79632.1| DYIQLVK%::PHOS::::::%sample\_2%cmpd\_1431

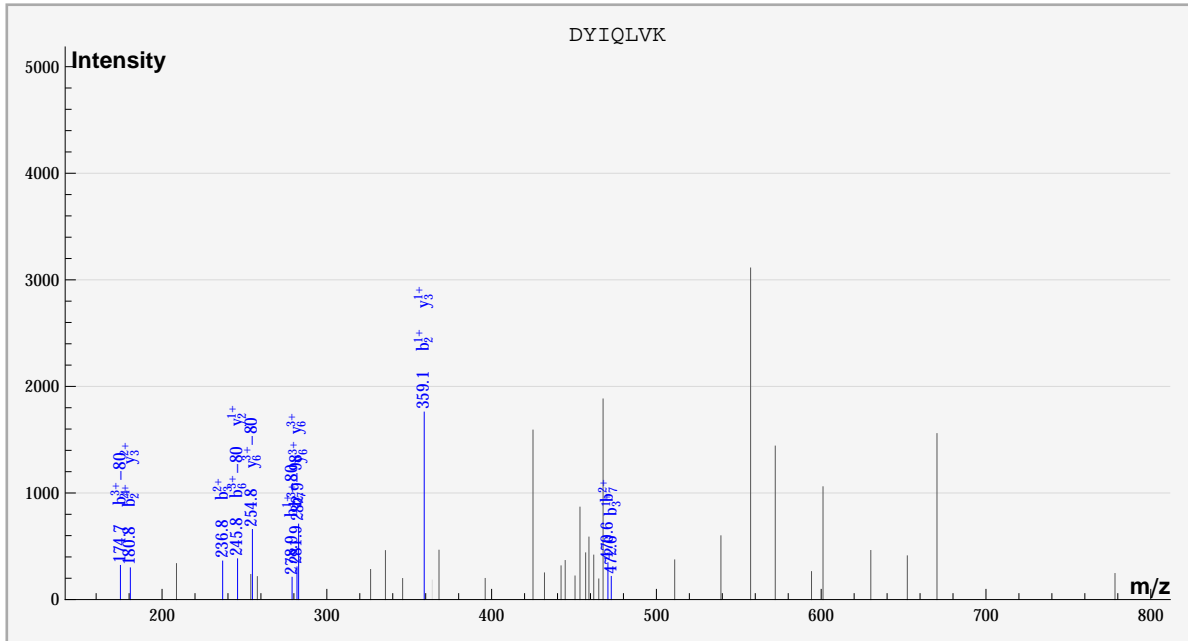

|   | # | b | b* | # | y | y* | P | P* |
|---|---|---|----|---|---|----|---|----|
| D | 1 |   |    |   |   |    |   |    |
| Y | 2 | ✓ | ✓  | 6 | ✓ | ✓  |   |    |
| I | 3 | ✓ |    | 5 |   |    |   |    |
| Q | 4 |   | ✓  | 4 |   |    |   |    |
| L | 5 |   |    | 3 | ✓ |    |   |    |
| V | 6 |   | ✓  | 2 | ✓ |    |   |    |
| K | 7 | ✓ | ✓  | 1 |   |    |   |    |

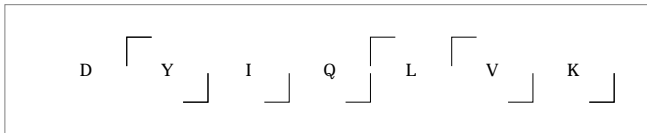

dbValid true YDKIIVK PHOS(1) 2. 478. 1.75408 4.91643 100. ? 2892.

S\_Acido\_new%gi|68567578|gb|AAY80507.1| YDKIIVK%:PHOS::::::%sample\_2%compd\_1441

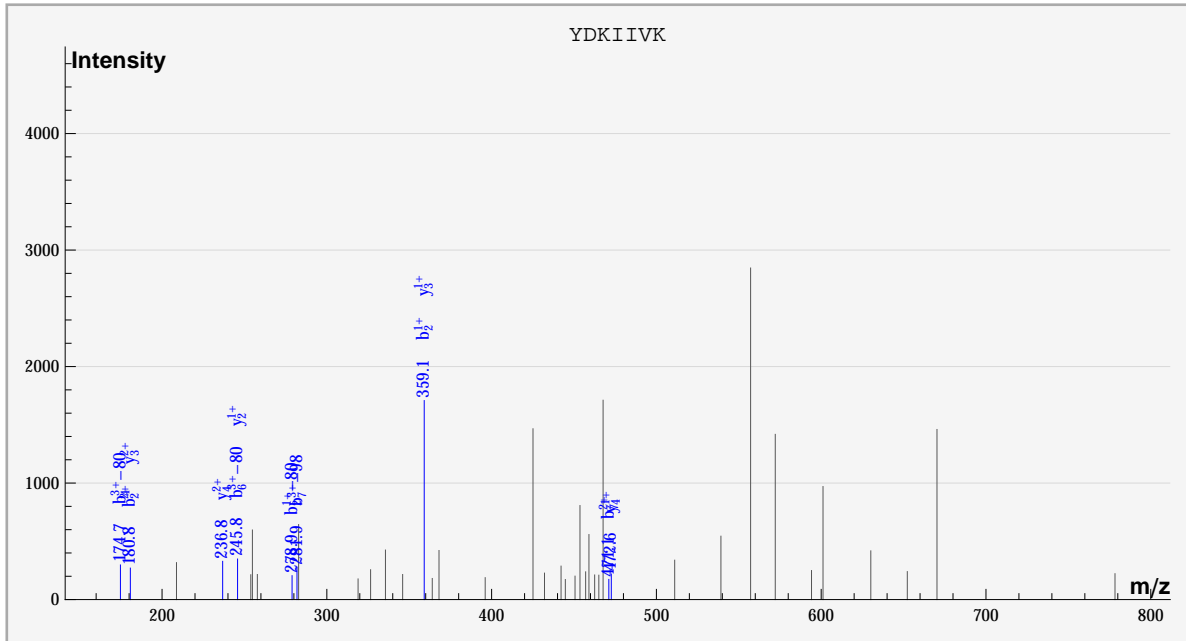

|   | # | b | b* | # | y | y* | P | P* |
|---|---|---|----|---|---|----|---|----|
| Y | 1 |   |    |   |   |    |   |    |
| D | 2 | ✓ | ✓  | 6 |   |    |   |    |
| K | 3 |   |    | 5 |   |    |   |    |
| I | 4 |   | ✓  | 4 | ✓ |    |   |    |
| I | 5 |   |    | 3 | ✓ |    |   |    |
| V | 6 |   | ✓  | 2 | ✓ |    |   |    |
| K | 7 | ✓ | ✓  | 1 |   |    |   |    |

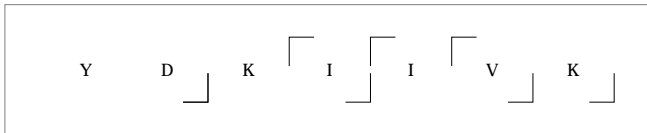

dbValid true DYIQLVK PHOS(1) 2. 478. 1.73589 5.471 100. ? 2940.

S\_Acido\_new%gi|68566703|gb|AA79632.1| DYIQLVK%::PHOS:::sample\_2%compd\_1483

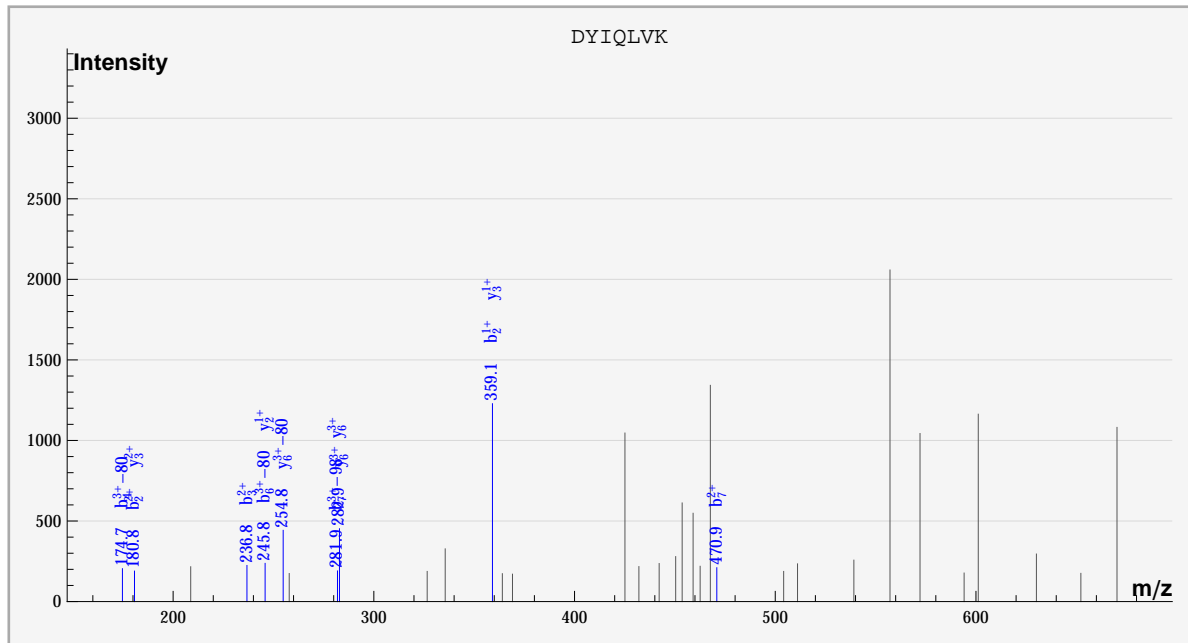

|   | # | b | b* | # | y | y* | P | P* |
|---|---|---|----|---|---|----|---|----|
| D | 1 |   |    |   |   |    |   |    |
| Y | 2 | ✓ |    | 6 | ✓ | ✓  |   |    |
| I | 3 | ✓ |    | 5 |   |    |   |    |
| Q | 4 |   | ✓  | 4 |   |    |   |    |
| L | 5 |   |    | 3 | ✓ |    |   |    |
| V | 6 |   | ✓  | 2 | ✓ |    |   |    |
| K | 7 | ✓ | ✓  | 1 |   |    |   |    |

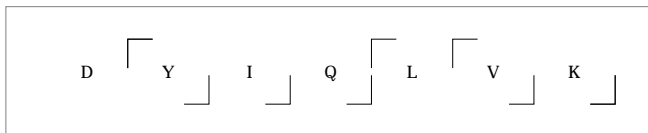

dbValid true DYIQLVK PHOS(1) 2. 478. 1.73589 5.2913 100. ? 2952.

S\_Acido\_new%gi|68566703|gb|AA79632.1| DYIQLVK%::PHOS:::%sample\_2%compd\_1493

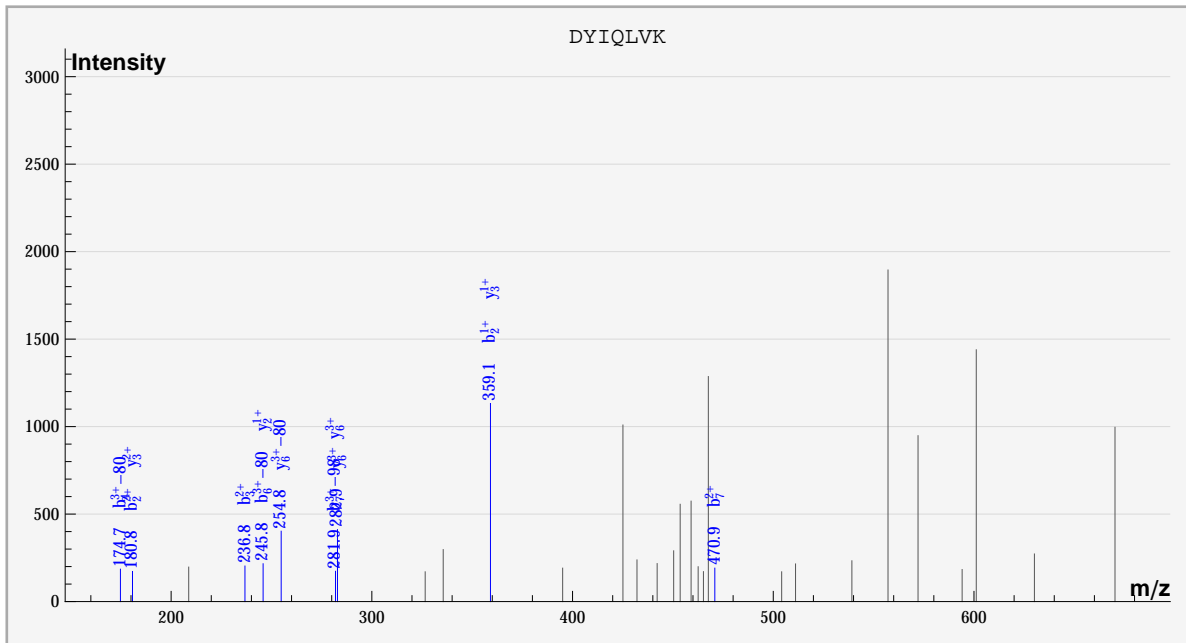

|   | # | b | b* | # | y | y* | P | P* |
|---|---|---|----|---|---|----|---|----|
| D | 1 |   |    |   |   |    |   |    |
| Y | 2 | ✓ |    | 6 | ✓ | ✓  |   |    |
| I | 3 | ✓ |    | 5 |   |    |   |    |
| Q | 4 |   | ✓  | 4 |   |    |   |    |
| L | 5 |   |    | 3 | ✓ |    |   |    |
| V | 6 |   | ✓  | 2 | ✓ |    |   |    |
| K | 7 | ✓ | ✓  | 1 |   |    |   |    |

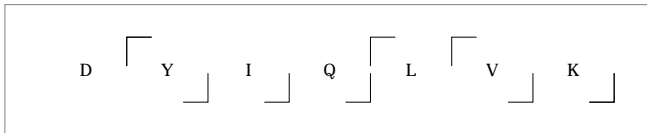

dbValid true DYIQLVK PHOS(1) 2. 478. 1.73589 5.50221 100. ? 2964.

S\_Acido\_new%gi|68566703|gb|AAY79632.1| DYIQLVK%::PHOS::::::%sample\_2%compd\_1503

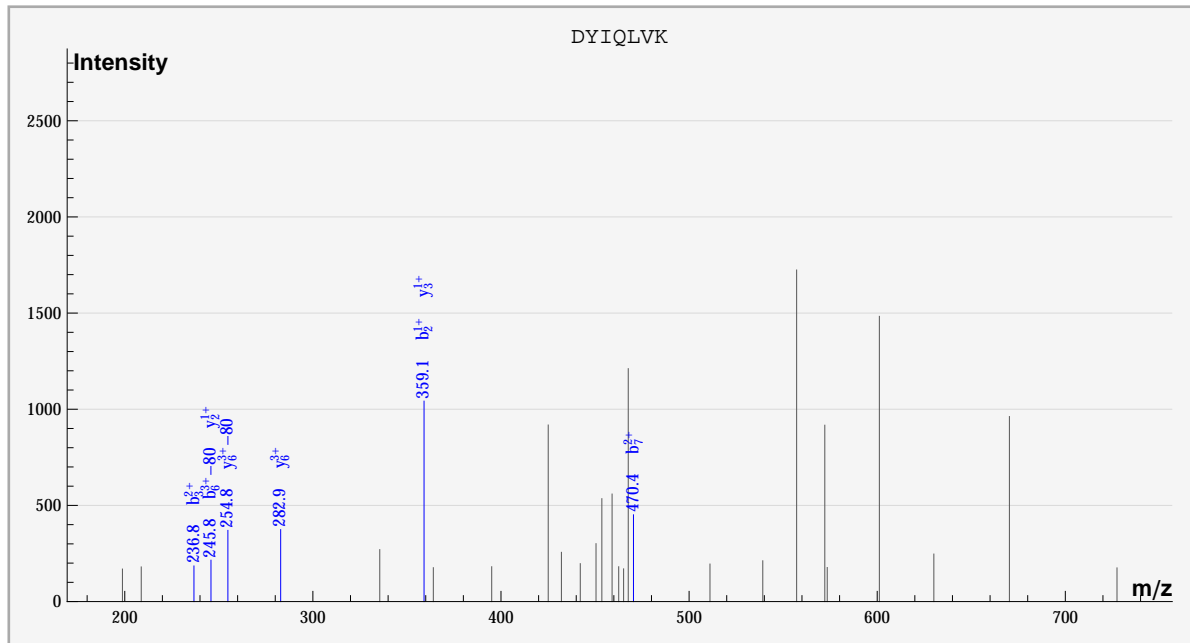

|   | # | b | b* | # | y | y* | P | P* |
|---|---|---|----|---|---|----|---|----|
| D | 1 |   |    |   |   |    |   |    |
| Y | 2 | ✓ |    | 6 | ✓ | ✓  |   |    |
| I | 3 | ✓ |    | 5 |   |    |   |    |
| Q | 4 |   |    | 4 |   |    |   |    |
| L | 5 |   |    | 3 | ✓ |    |   |    |
| V | 6 |   | ✓  | 2 | ✓ |    |   |    |
| K | 7 | ✓ |    | 1 |   |    |   |    |

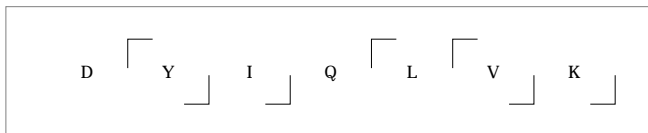



dbValid true DYIQLVK PHOS(1) 2. 478. 1.73589 5.316 100. ? 2976.

S\_Acido\_new%gi|68566703|gb|AA79632.1| DYIQLVK%::PHOS:::%sample\_2%compd\_1513

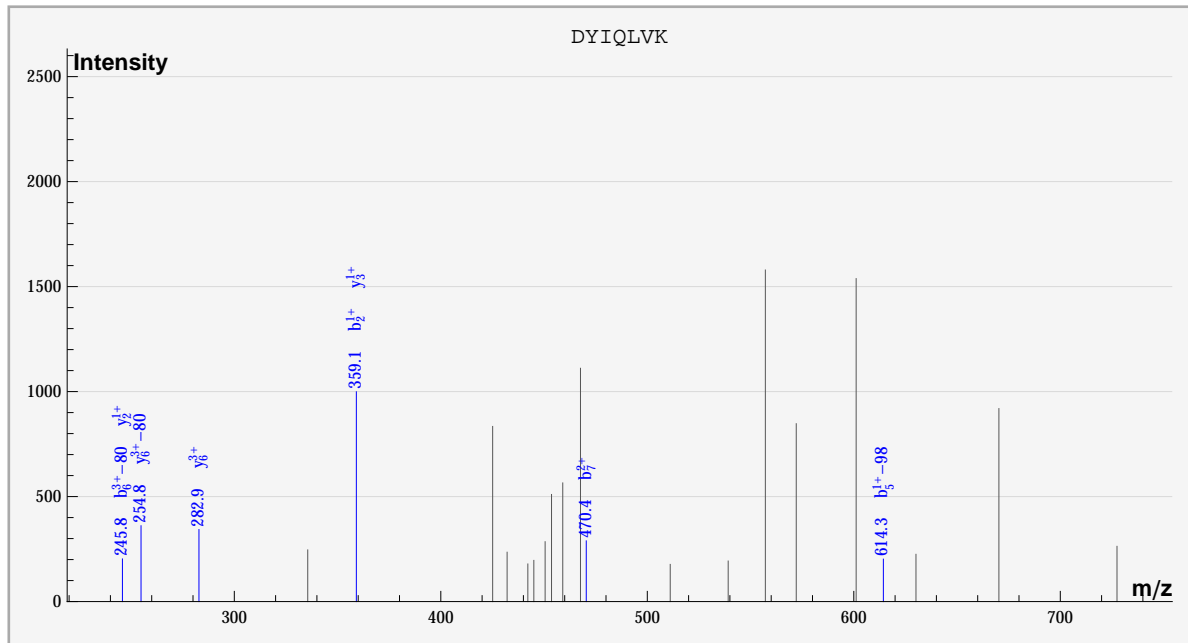

|   | # | b | b* | # | y | y* | P | P* |
|---|---|---|----|---|---|----|---|----|
| D | 1 |   |    |   |   |    |   |    |
| Y | 2 | ✓ |    | 6 | ✓ | ✓  |   |    |
| I | 3 |   |    | 5 |   |    |   |    |
| Q | 4 |   |    | 4 |   |    |   |    |
| L | 5 |   | ✓  | 3 |   | ✓  |   |    |
| V | 6 |   | ✓  | 2 |   | ✓  |   |    |
| K | 7 | ✓ |    | 1 |   |    |   |    |

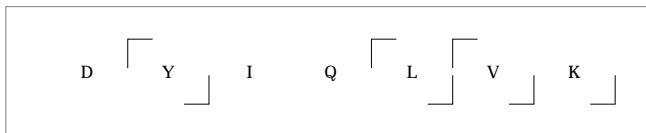

dbValid true DYIQLVK PHOS(1) 2. 478. 1.73589 5.26506 100. ? 2988.  
 S\_Acido\_new%gi|68566703|gb|AAY79632.1| DYIQLVK%::PHOS:::::sample\_2%compd\_1523

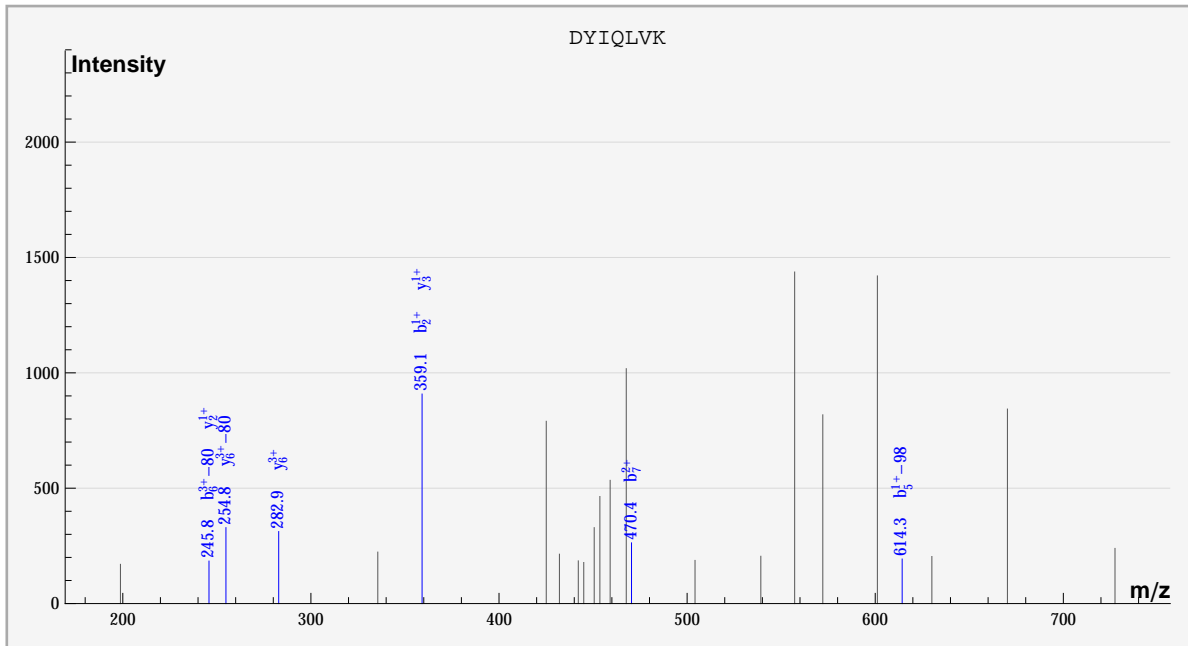

|   | # | b | b* | # | y | y* | P | P* |
|---|---|---|----|---|---|----|---|----|
| D | 1 |   |    |   |   |    |   |    |
| Y | 2 | ✓ |    | 6 | ✓ | ✓  |   |    |
| I | 3 |   |    | 5 |   |    |   |    |
| Q | 4 |   |    | 4 |   |    |   |    |
| L | 5 |   | ✓  | 3 |   | ✓  |   |    |
| V | 6 |   | ✓  | 2 |   | ✓  |   |    |
| K | 7 | ✓ |    | 1 |   |    |   |    |

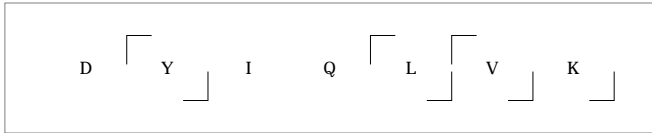

dbValid true DYIQLVK PHOS(1) 2. 478. 1.73589 5.33033 100. ? 3024.

S\_Acido\_new%gi|68566703|gb|AAY79632.1| DYIQLVK%::PHOS:::sample\_2%cmpd\_1555

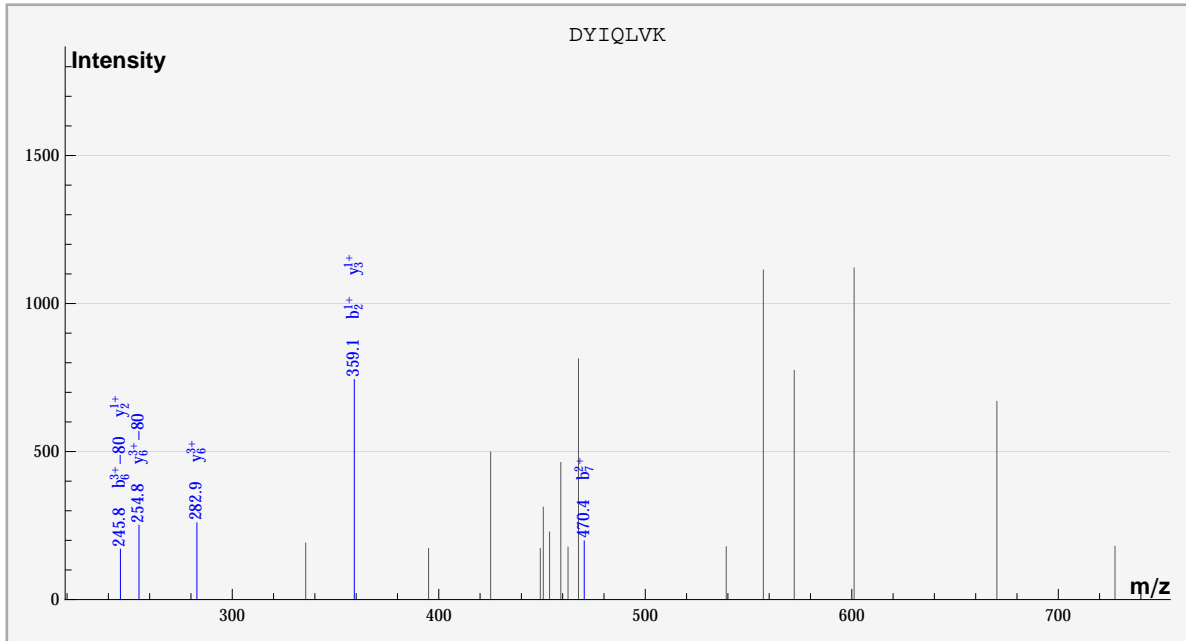

|   | # | b | b* | # | y | y* | P | P* |
|---|---|---|----|---|---|----|---|----|
| D | 1 |   |    |   |   |    |   |    |
| Y | 2 | ✓ |    | 6 | ✓ | ✓  |   |    |
| I | 3 |   |    | 5 |   |    |   |    |
| Q | 4 |   |    | 4 |   |    |   |    |
| L | 5 |   |    | 3 | ✓ |    |   |    |
| V | 6 |   | ✓  | 2 | ✓ |    |   |    |
| K | 7 | ✓ |    | 1 |   |    |   |    |

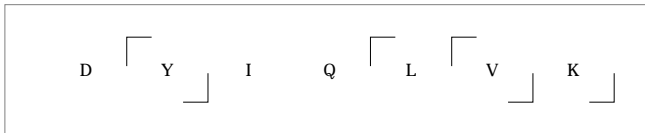

dbValid true RYSITR PHOS(2) 2. 480. -1.80647 4.79998 100. ? 1482.  
 S\_Acido\_new%gil68566621|gb|AAY79550.1| RYSITR%::PHOS::PHOS::%sample\_3%cmpd\_231

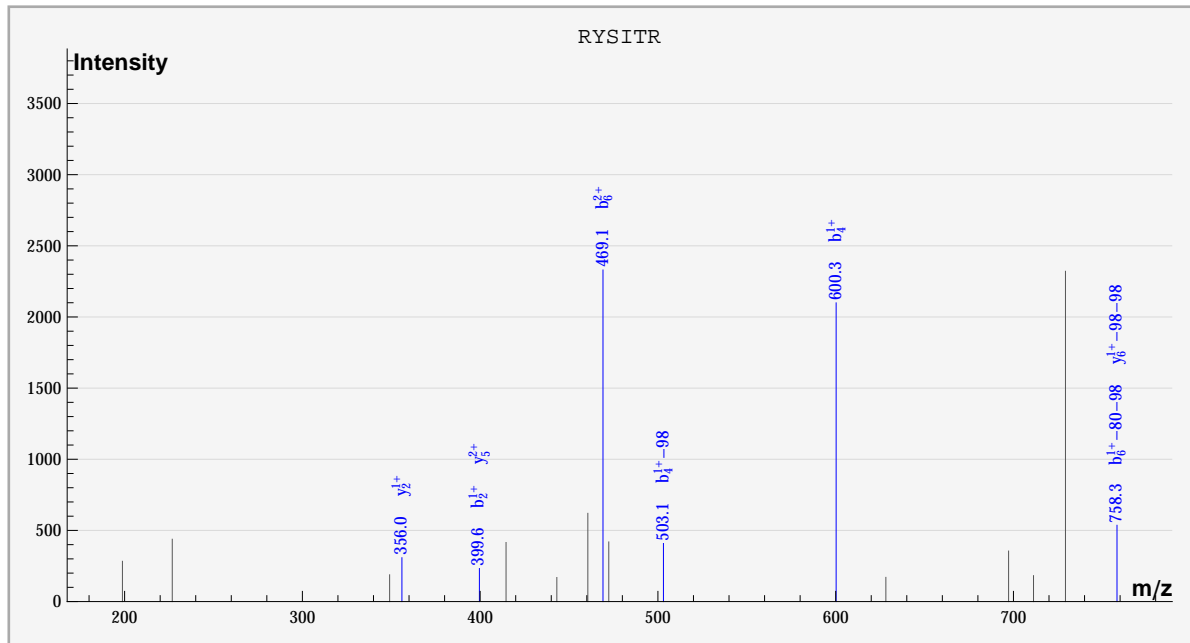

|   | # | b | b* | # | y | y* | P | P* |
|---|---|---|----|---|---|----|---|----|
| R | 1 |   |    |   |   |    |   | ✓  |
| Y | 2 | ✓ |    | 5 | ✓ |    |   |    |
| S | 3 |   |    | 4 |   |    |   |    |
| I | 4 | ✓ | ✓  | 3 |   |    |   |    |
| T | 5 |   |    | 2 | ✓ |    |   |    |
| R | 6 | ✓ | ✓  | 1 |   |    |   |    |

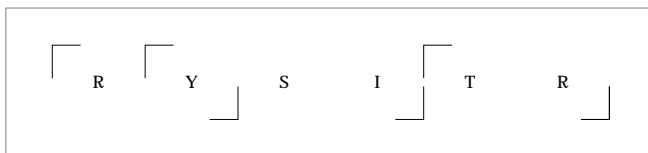

dbValid true RYSITR PHOS(2) 2. 480. -1.80647 4.79912 100. ? 1704.

S\_Acido\_new%gi|68566621|gb|AA79550.1| RYSITR%::PHOS::PHOS::%sample\_3%compd\_414

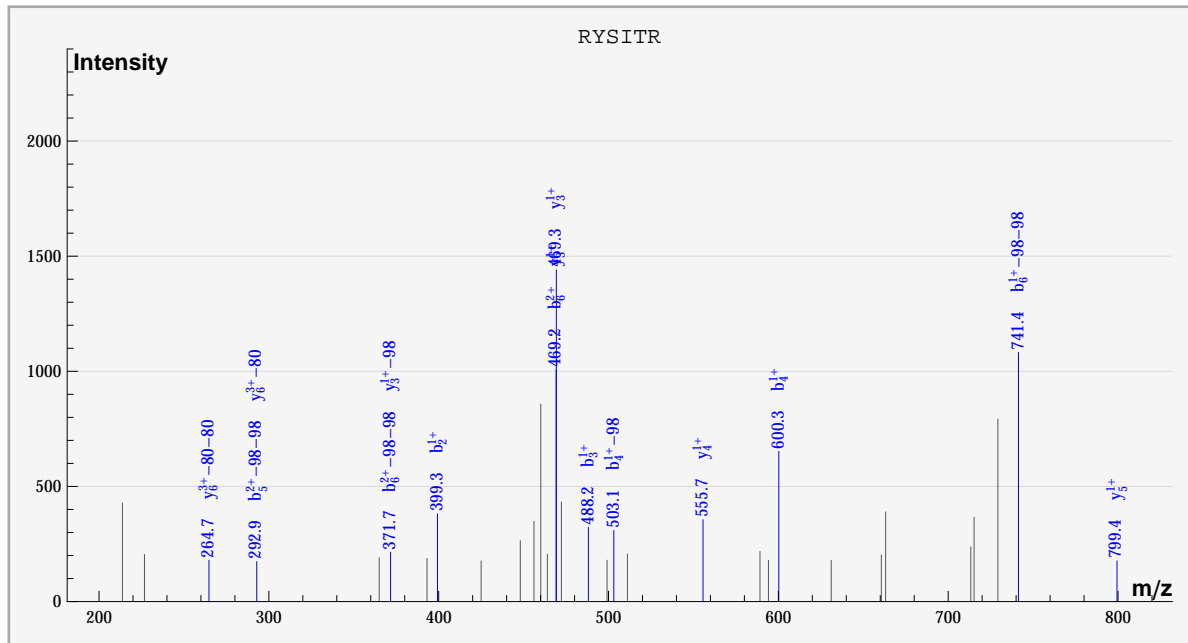

|   | # | b | b* | # | y | y* | P | P* |
|---|---|---|----|---|---|----|---|----|
| R | 1 |   |    |   |   |    |   | ✓  |
| Y | 2 | ✓ |    | 5 | ✓ |    |   |    |
| S | 3 | ✓ |    | 4 | ✓ |    |   |    |
| I | 4 | ✓ | ✓  | 3 | ✓ | ✓  |   |    |
| T | 5 |   | ✓  | 2 |   |    |   |    |
| R | 6 | ✓ | ✓  | 1 |   |    |   |    |

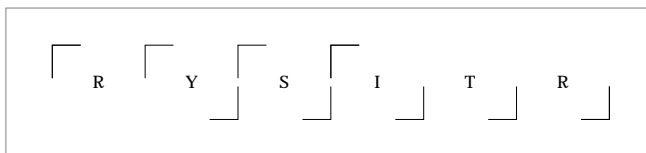

dbValid true EVYNLNK PHOS(1) 2. 482. -1.78468 4.67144 100. ? 1740.  
 S\_Acido\_new%gi|68566803|gb|AAY79732.1| EVYNLNK%:::PHOS:::%sample\_3%cmpd\_446

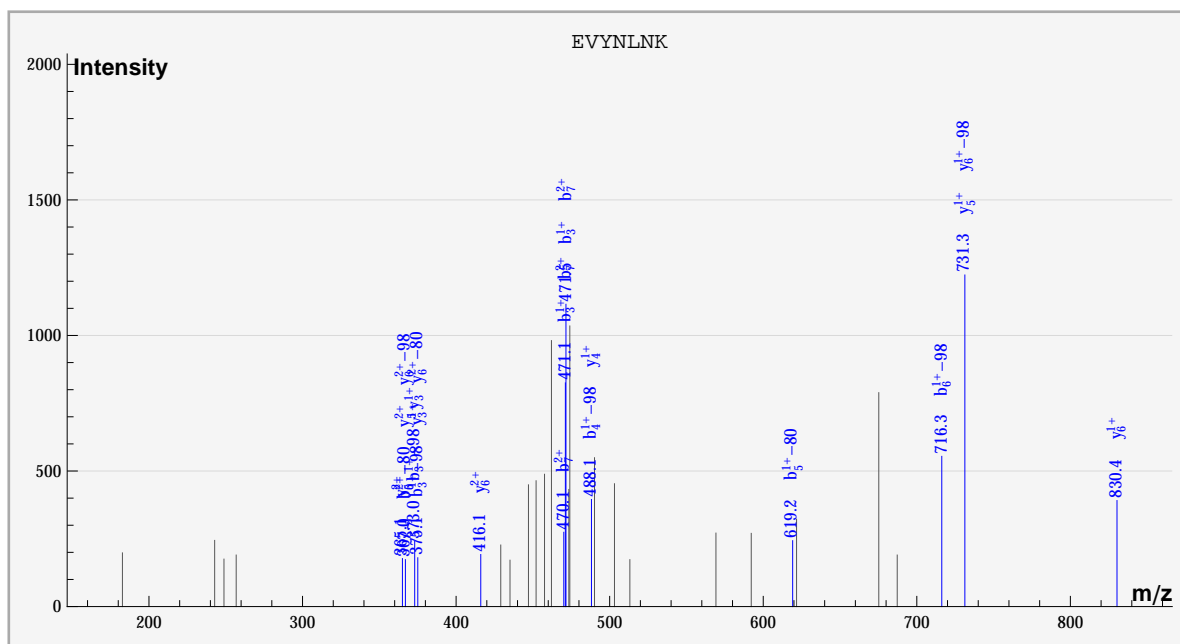

|   | # | b | b* | # | y | y* | P | P* |
|---|---|---|----|---|---|----|---|----|
| E | 1 |   |    |   |   |    |   |    |
| V | 2 |   |    | 6 | ✓ | ✓  |   |    |
| Y | 3 | ✓ | ✓  | 5 | ✓ |    |   |    |
| N | 4 |   | ✓  | 4 | ✓ |    |   |    |
| L | 5 |   | ✓  | 3 | ✓ |    |   |    |
| N | 6 |   | ✓  | 2 |   |    |   |    |
| K | 7 | ✓ |    | 1 |   |    |   |    |

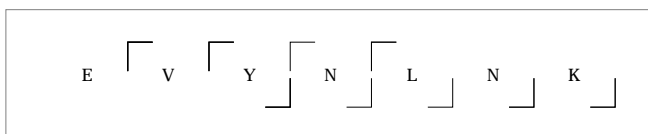

dbValid true EVYNLNK PHOS(1) 2. 482. -1.78468 4.66991 100. ? 1752.  
 S\_Acido\_new%gi|68566803|gb|AAY79732.1| EVYNLNK%:::PHOS:::%sample\_3%cmpd\_456

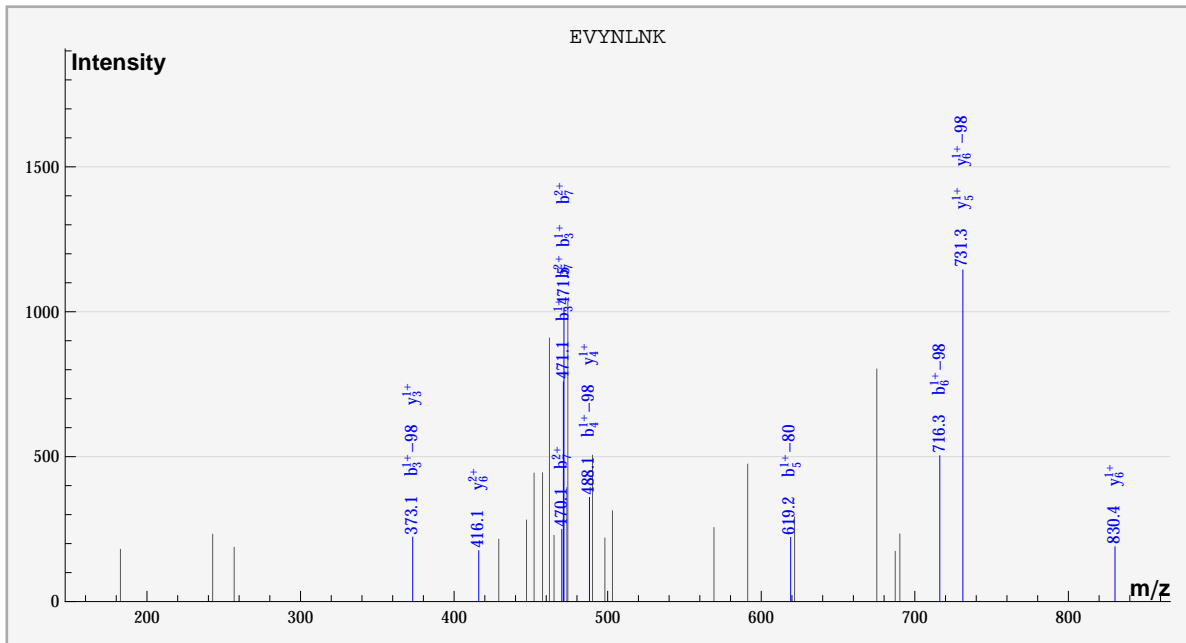

|   | # | b | b* | # | y | y* | P | P* |
|---|---|---|----|---|---|----|---|----|
| E | 1 |   |    |   |   |    |   |    |
| V | 2 |   |    | 6 | ✓ | ✓  |   |    |
| Y | 3 | ✓ | ✓  | 5 | ✓ |    |   |    |
| N | 4 |   | ✓  | 4 | ✓ |    |   |    |
| L | 5 |   | ✓  | 3 | ✓ |    |   |    |
| N | 6 |   | ✓  | 2 |   |    |   |    |
| K | 7 | ✓ |    | 1 |   |    |   |    |

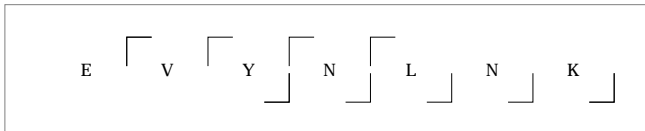

dbValid true KGSNEINK PHOS(1) 2. 487. -1.77632 5.806 100. ? 1656.  
 S\_Acido\_new%gi|68567096|gb|AAY80025.1| KGSNEINK%:::PHOS:::sample\_3%compd\_381

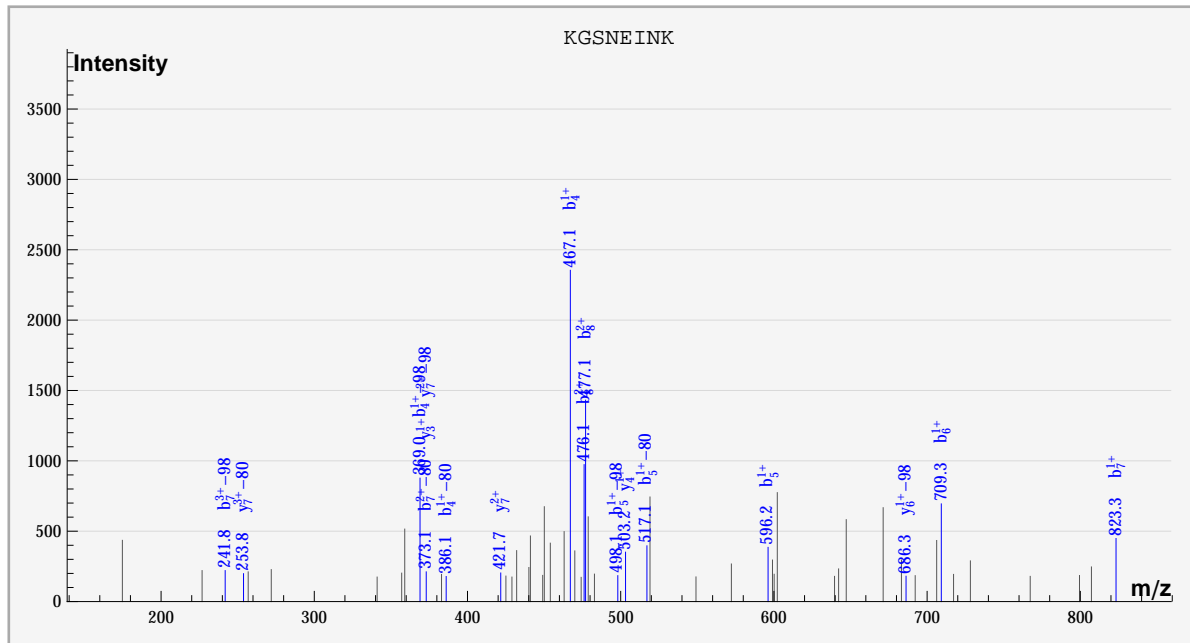

|   | # | b | b* | # | y | y* | P | P* |
|---|---|---|----|---|---|----|---|----|
| K | 1 |   |    |   |   |    |   |    |
| G | 2 |   |    | 7 | ✓ | ✓  |   |    |
| S | 3 |   |    | 6 |   | ✓  |   |    |
| N | 4 | ✓ | ✓  | 5 |   |    |   |    |
| E | 5 | ✓ | ✓  | 4 | ✓ |    |   |    |
| I | 6 | ✓ |    | 3 | ✓ |    |   |    |
| N | 7 | ✓ | ✓  | 2 |   |    |   |    |
| K | 8 | ✓ |    | 1 |   |    |   |    |

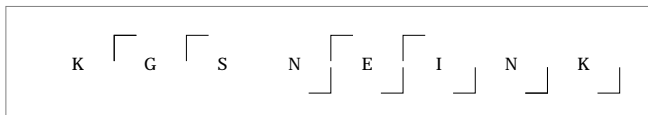



dbValid true YNWWPK PHOS(1) 2. 488. -0.797983 4.98682 100. ? 2208.  
 S\_Acido\_new%gi|68566620|gb|AAY79549.1| YNWWPK%:PHOS:::sample\_3%compd\_854

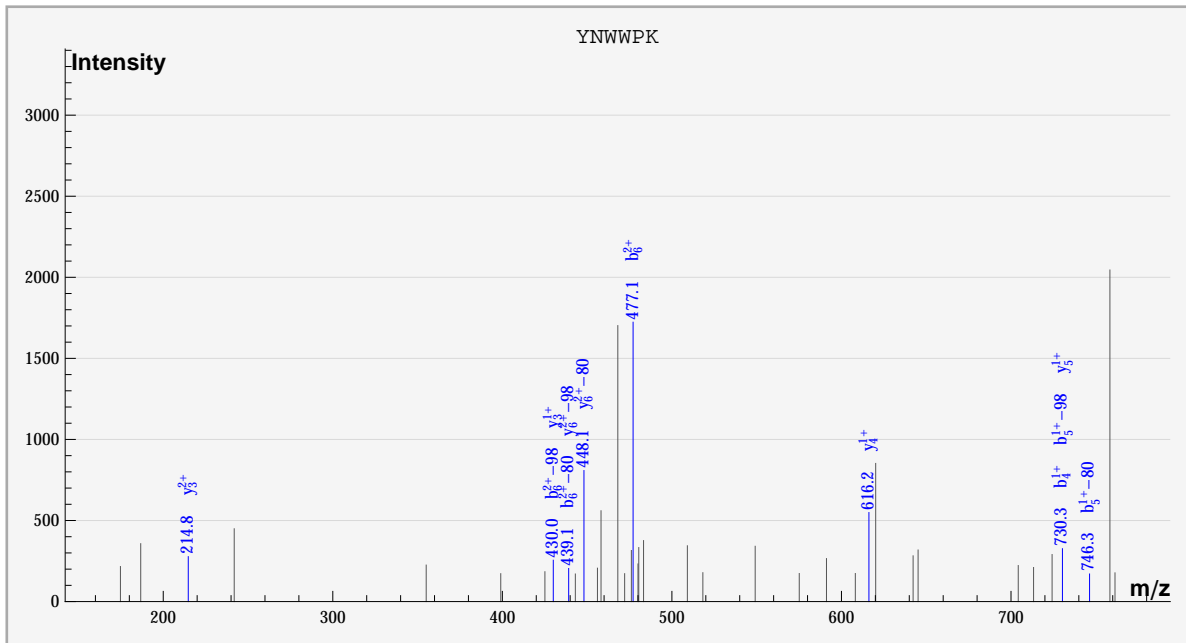

|   | # | b | b* | # | y | y* | P | P* |
|---|---|---|----|---|---|----|---|----|
| Y | 1 |   |    |   |   |    |   | ✓  |
| N | 2 |   |    | 5 | ✓ |    |   |    |
| W | 3 |   |    | 4 | ✓ |    |   |    |
| W | 4 | ✓ |    | 3 | ✓ |    |   |    |
| P | 5 |   | ✓  | 2 |   |    |   |    |
| K | 6 | ✓ | ✓  | 1 |   |    |   |    |

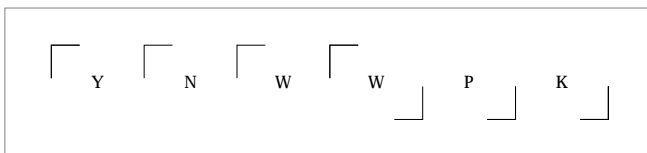

dbValid true TRSILVK PHOS(2) 2. 490. -1.26498 4.87335 100. ? 2412.  
 S\_Acido\_new%gil68566576|gb|AAY79505.1| TRSILVK%:PHOS::PHOS:::sample\_0%cmpd\_1025

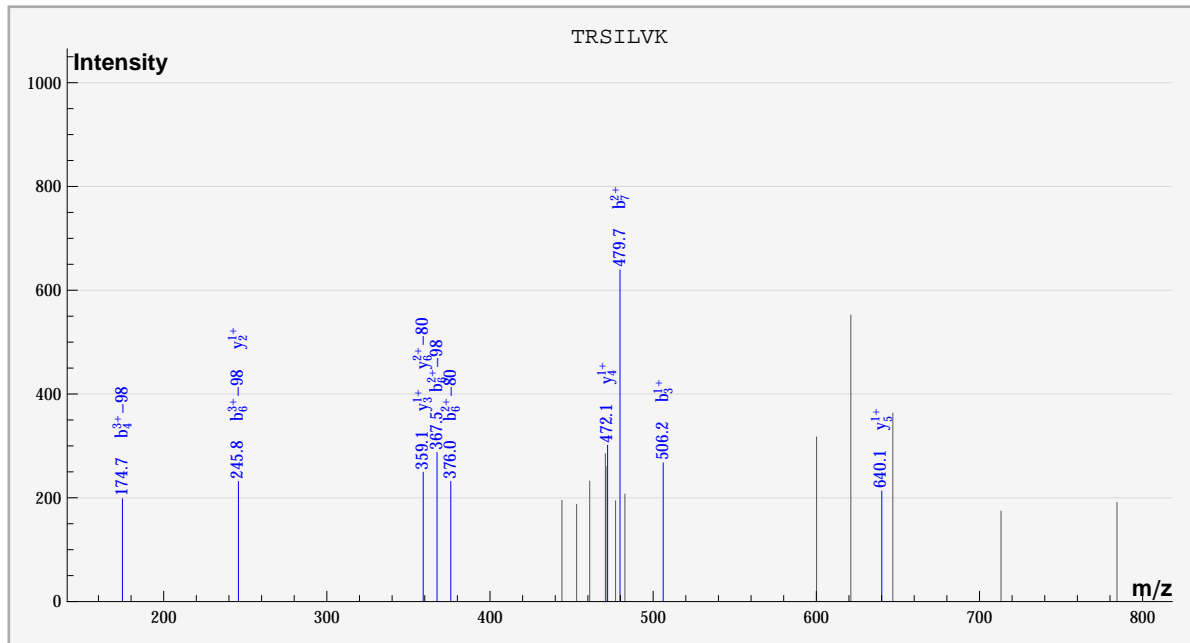

|   | # | b | b* | # | y | y* | P | P* |
|---|---|---|----|---|---|----|---|----|
| T | 1 |   |    |   |   |    |   |    |
| R | 2 |   |    | 6 |   | ✓  |   |    |
| S | 3 | ✓ |    | 5 | ✓ |    |   |    |
| I | 4 |   | ✓  | 4 | ✓ |    |   |    |
| L | 5 |   |    | 3 | ✓ |    |   |    |
| V | 6 |   | ✓  | 2 | ✓ |    |   |    |
| K | 7 | ✓ |    | 1 |   |    |   |    |

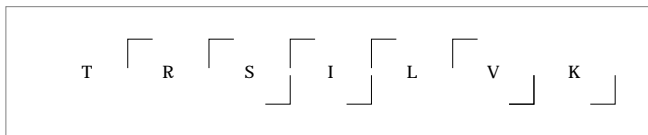

dbValid true DKSVFSR PHOS(2) 2. 501. -1.30919 5.3698 100. ? 1518.

S\_Acido\_new%gii68568662|gb|AAy81591.1| DKSVFSR%:::PHOS:::PHOS:::sample\_1%compd\_276

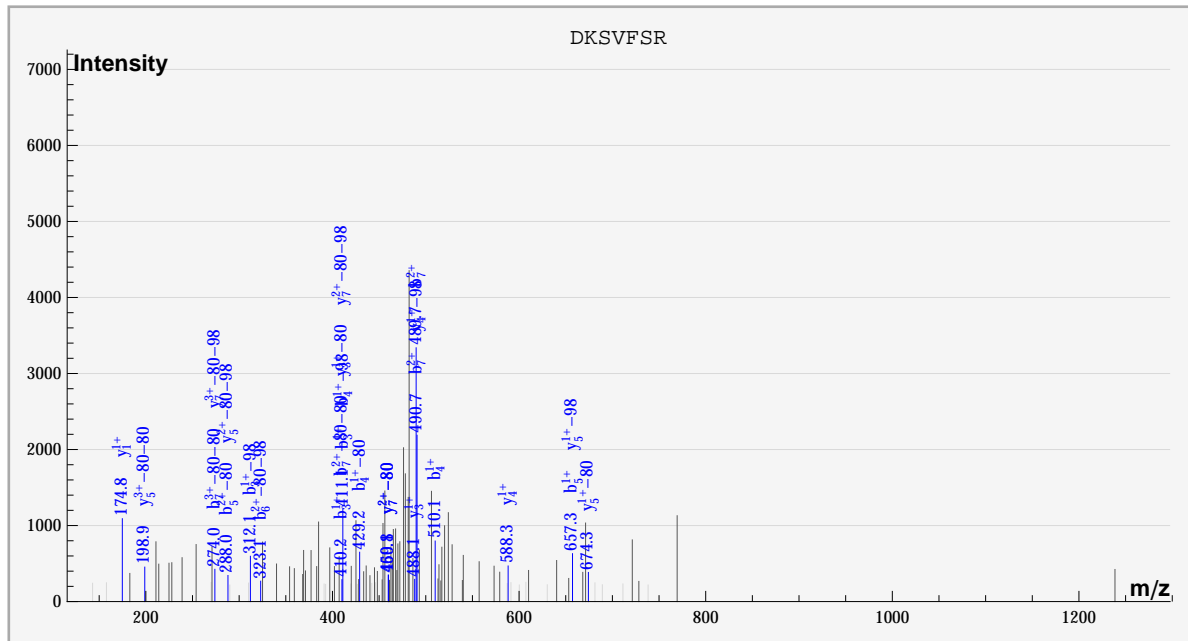

|   | # | b | b* | # | y | y* | P | P* |
|---|---|---|----|---|---|----|---|----|
| D | 1 |   |    |   |   |    |   | ✓  |
| K | 2 |   |    | 6 |   |    |   |    |
| S | 3 | ✓ | ✓  | 5 |   | ✓  |   |    |
| V | 4 | ✓ | ✓  | 4 | ✓ | ✓  |   |    |
| F | 5 | ✓ | ✓  | 3 | ✓ | ✓  |   |    |
| S | 6 |   | ✓  | 2 |   |    |   |    |
| R | 7 | ✓ | ✓  | 1 | ✓ |    |   |    |

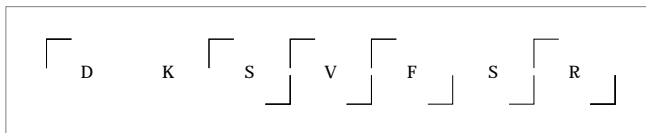

dbValid true NIVETLTK PHOS(1) 2. 501. -1.7481 5.16448 100. ? 1566.  
 S\_Acido\_new%gi|68567263|gb|AAY80192.1| NIVETLTK%::::::PHOS::%sample\_1%cmpd\_320

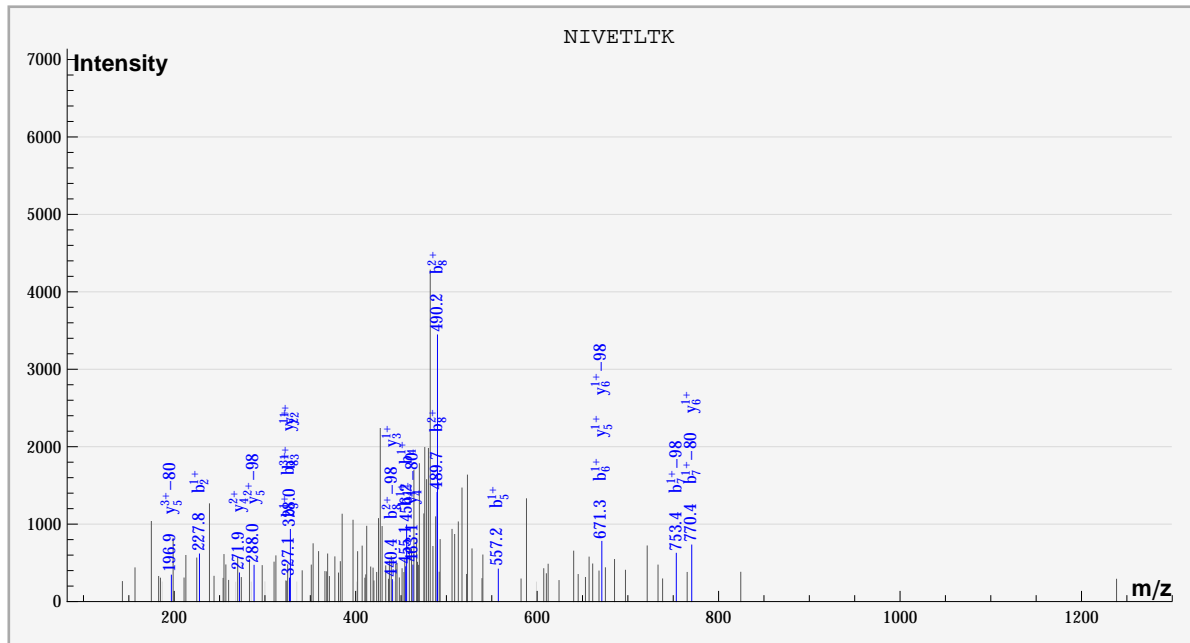

|   | # | b | b* | # | y | y* | P | P* |
|---|---|---|----|---|---|----|---|----|
| N | 1 |   |    |   |   |    |   |    |
| I | 2 | ✓ |    | 7 |   |    |   |    |
| V | 3 | ✓ |    | 6 | ✓ | ✓  |   |    |
| E | 4 | ✓ |    | 5 | ✓ | ✓  |   |    |
| T | 5 | ✓ |    | 4 | ✓ | ✓  |   |    |
| L | 6 | ✓ |    | 3 | ✓ |    |   |    |
| T | 7 |   | ✓  | 2 | ✓ |    |   |    |
| K | 8 | ✓ | ✓  | 1 |   |    |   |    |

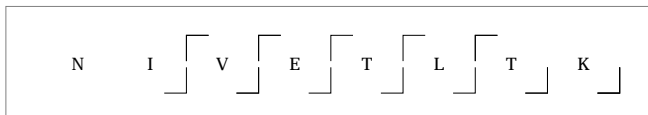

dbValid true NIVETLTK PHOS(1) 2. 501. -1.7481 4.96632 100. ? 1638.  
 S\_Acido\_new%gi|68567263|gb|AAY80192.1| NIVETLTK%::::::PHOS::%sample\_1%compd\_386

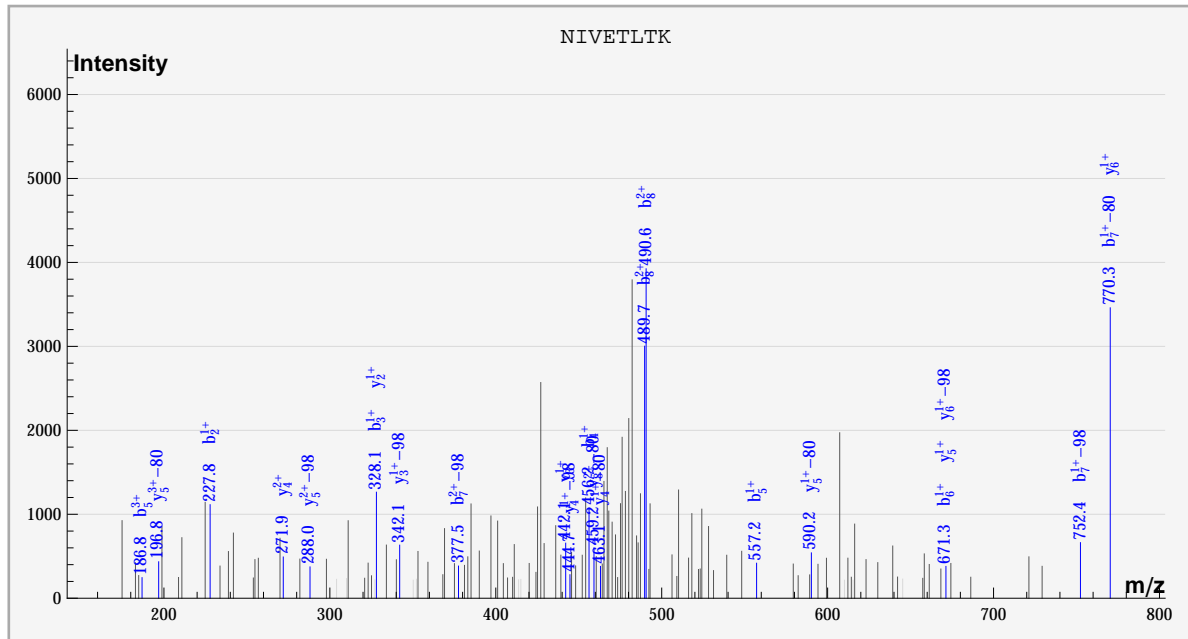

|   | # | b | b* | # | y | y* | P | P* |
|---|---|---|----|---|---|----|---|----|
| N | 1 |   |    |   |   |    |   | ✓  |
| I | 2 | ✓ |    | 7 |   |    |   |    |
| V | 3 | ✓ |    | 6 | ✓ | ✓  |   |    |
| E | 4 | ✓ |    | 5 | ✓ | ✓  |   |    |
| T | 5 | ✓ |    | 4 | ✓ | ✓  |   |    |
| L | 6 | ✓ |    | 3 | ✓ | ✓  |   |    |
| T | 7 |   | ✓  | 2 | ✓ |    |   |    |
| K | 8 | ✓ |    | 1 |   |    |   |    |

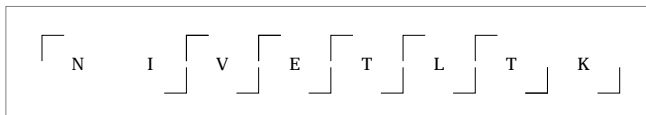

dbConflictWinner true NIVETLTK PHOS(1) 2. 501. -1.7481 5.82489 100. ?  
 1674. S\_Acido\_new%gi|68567263|gb|AAY80192.1| NIVETLTK%::::::PHOS::%sample\_1%compd\_418

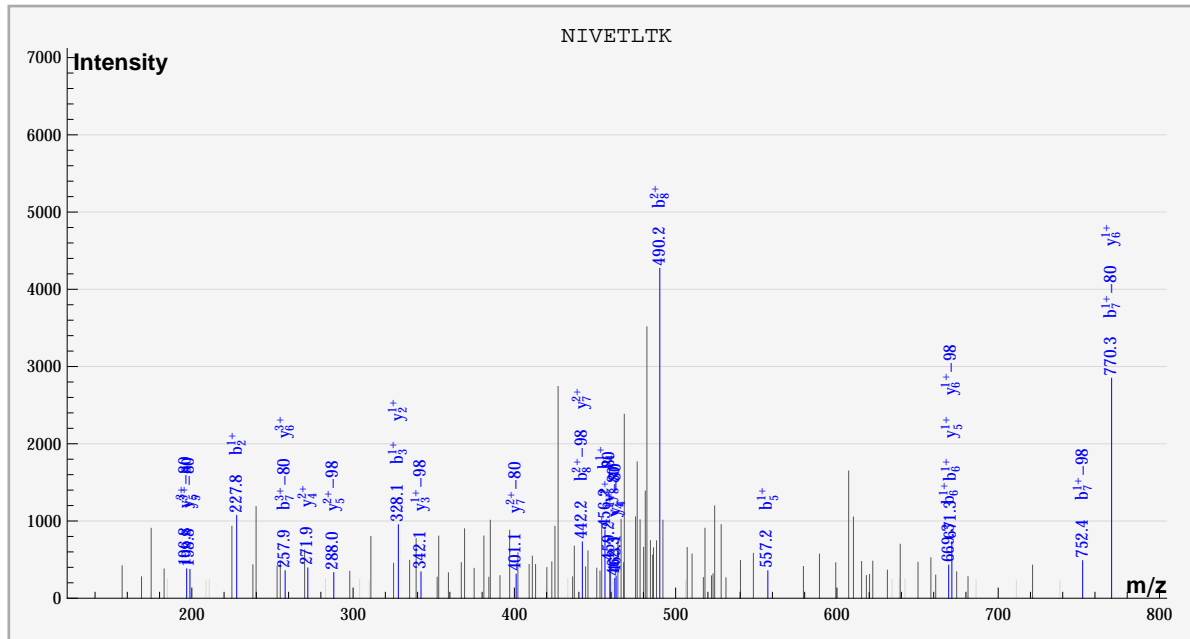

|   | # | b | b* | # | y | y* | P | P* |
|---|---|---|----|---|---|----|---|----|
| N | 1 |   |    |   |   |    |   | ✓  |
| I | 2 | ✓ |    | 7 | ✓ | ✓  |   |    |
| V | 3 | ✓ |    | 6 | ✓ | ✓  |   |    |
| E | 4 | ✓ |    | 5 | ✓ | ✓  |   |    |
| T | 5 | ✓ |    | 4 | ✓ | ✓  |   |    |
| L | 6 | ✓ |    | 3 |   | ✓  |   |    |
| T | 7 |   | ✓  | 2 | ✓ |    |   |    |
| K | 8 | ✓ | ✓  | 1 |   |    |   |    |

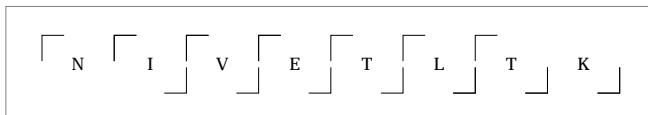

dbValid true LSENNWR PHOS(1) 2. 501. -1.2918 5.17127 100. ? 1782.  
 S\_Acido\_new%gi|68568383|gb|AAY81312.1| LSENNWR%:PHOS:::::sample\_1%compd\_476

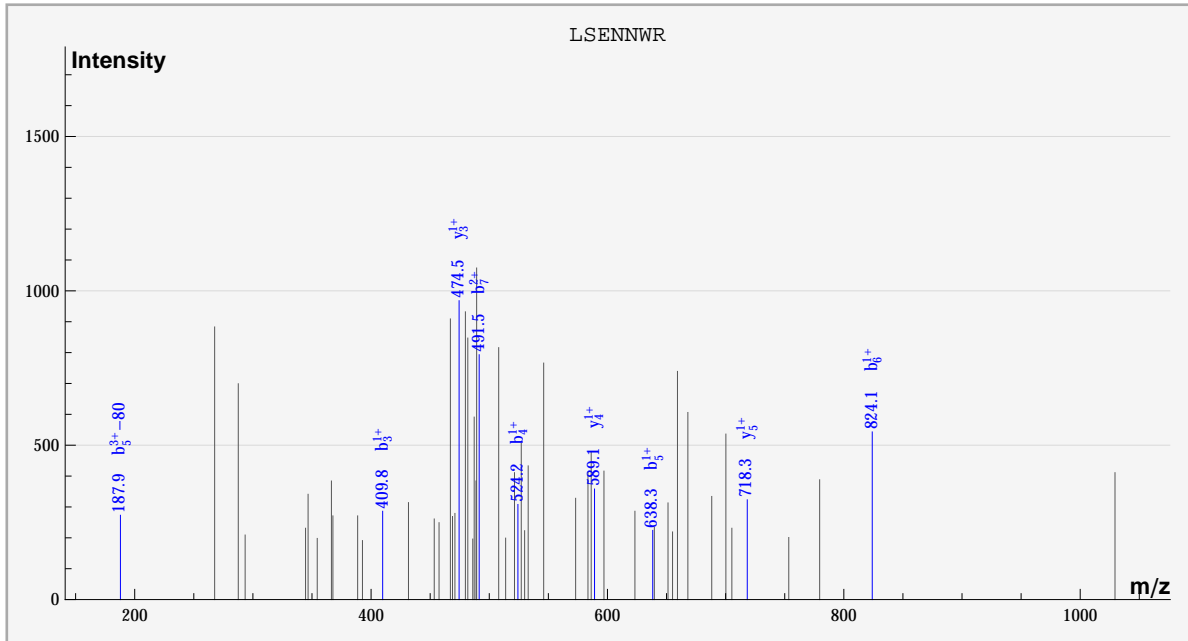

|   | # | b | b* | # | y | y* | P | P* |
|---|---|---|----|---|---|----|---|----|
| L | 1 |   |    |   |   |    |   |    |
| S | 2 |   |    | 6 |   |    |   |    |
| E | 3 | ✓ |    | 5 | ✓ |    |   |    |
| N | 4 | ✓ |    | 4 | ✓ |    |   |    |
| N | 5 | ✓ | ✓  | 3 | ✓ |    |   |    |
| W | 6 | ✓ |    | 2 |   |    |   |    |
| R | 7 | ✓ |    | 1 |   |    |   |    |

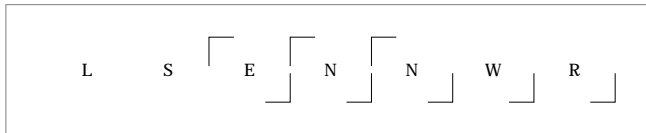

dbValid true SIINGEER PHOS(1) 2. 501. -1.77887 5.43994 100. ? 1794.

S\_Acido\_new%gi|68567522|gb|AAY80451.1| SIINGEER%:PHOS:::::::sample\_0%cmpd\_450

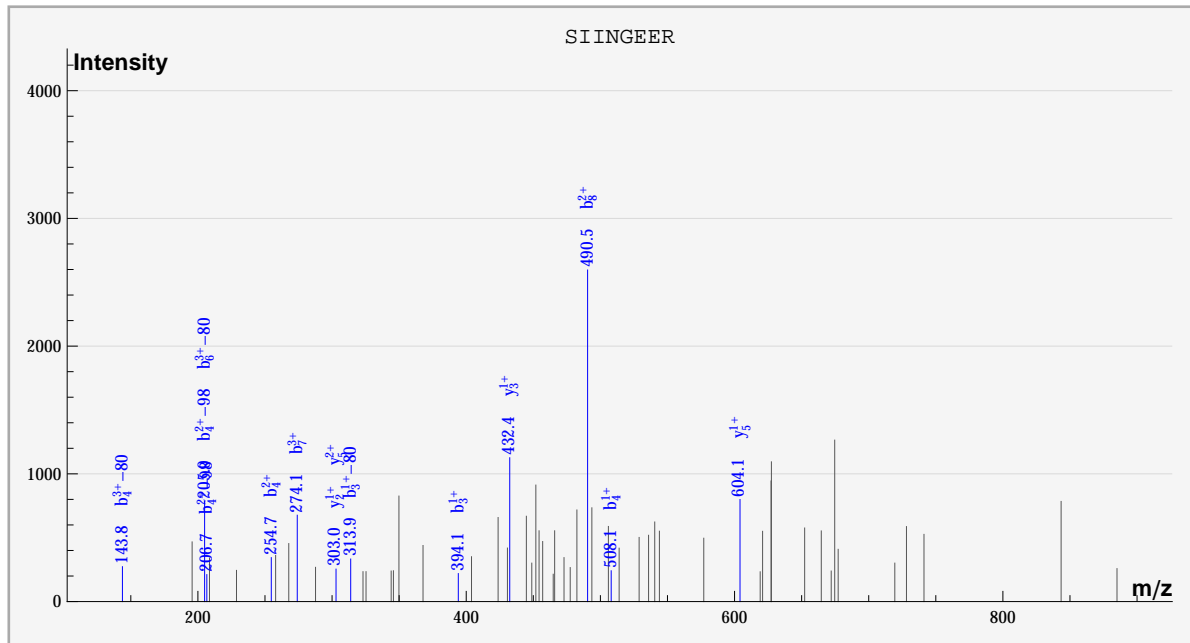

|   | # | b | b* | # | y | y* | P | P* |
|---|---|---|----|---|---|----|---|----|
| S | 1 |   |    |   |   |    |   |    |
| I | 2 |   |    | 7 |   |    |   |    |
| I | 3 | ✓ | ✓  | 6 |   |    |   |    |
| N | 4 | ✓ | ✓  | 5 | ✓ |    |   |    |
| G | 5 |   |    | 4 |   |    |   |    |
| E | 6 |   | ✓  | 3 | ✓ |    |   |    |
| E | 7 | ✓ |    | 2 | ✓ |    |   |    |
| R | 8 | ✓ |    | 1 |   |    |   |    |

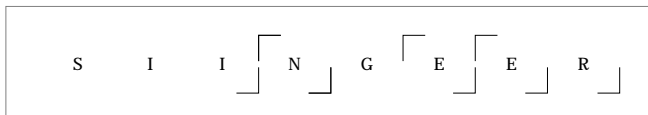



dbValid true ERVTGSLR PHOS(1) 2. 501. -1.75506 4.98094 100. ? 2052.  
 S\_Acido\_new%gi|68567102|gb|AAY80031.1| ERVTGSLR%:::PHOS:::sample\_1%compd\_769

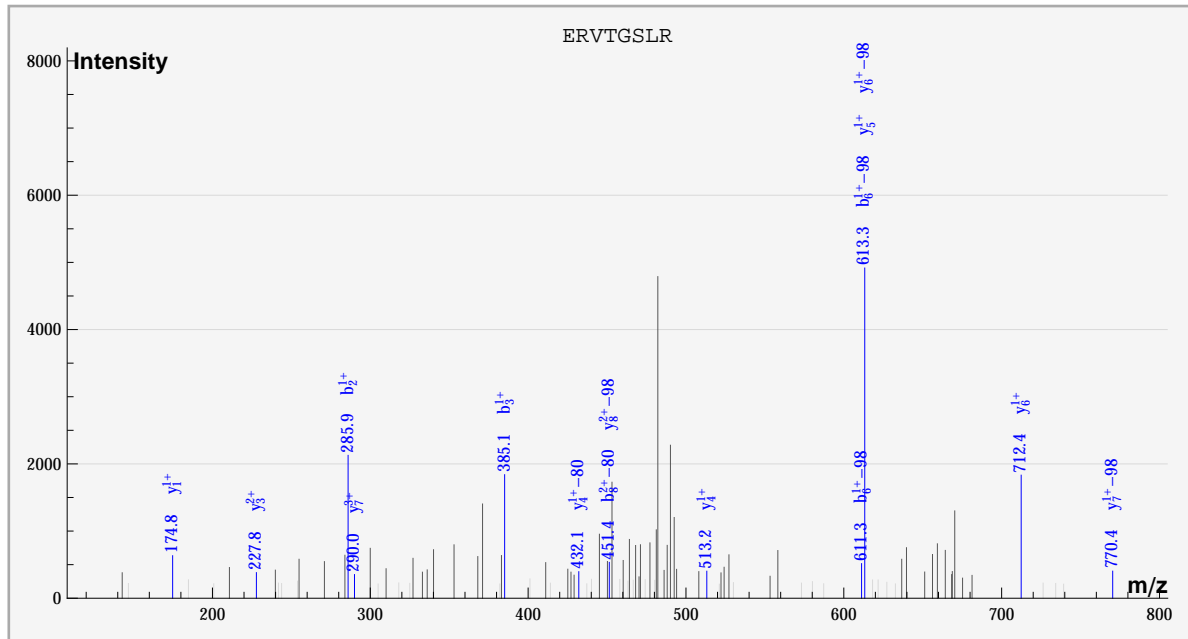

|   | # | b | b* | # | y | y* | P | P* |
|---|---|---|----|---|---|----|---|----|
| E | 1 |   |    |   |   |    |   | ✓  |
| R | 2 | ✓ |    | 7 | ✓ | ✓  |   |    |
| V | 3 | ✓ |    | 6 | ✓ | ✓  |   |    |
| T | 4 |   |    | 5 | ✓ |    |   |    |
| G | 5 |   |    | 4 | ✓ | ✓  |   |    |
| S | 6 | ✓ |    | 3 | ✓ |    |   |    |
| L | 7 |   |    | 2 |   |    |   |    |
| R | 8 | ✓ |    | 1 | ✓ |    |   |    |

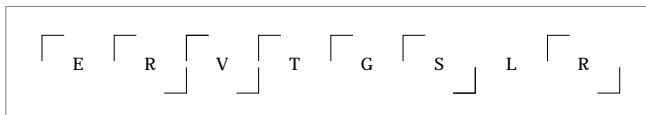

dbValid true ERVTGSLR PHOS(1) 2. 501. -1.75506 4.94674 100. ? 2100.  
 S\_Acido\_new%gi|68567102|gb|AAY80031.1| ERVTGSLR%:::::PHOS:::sample\_1%compd\_812

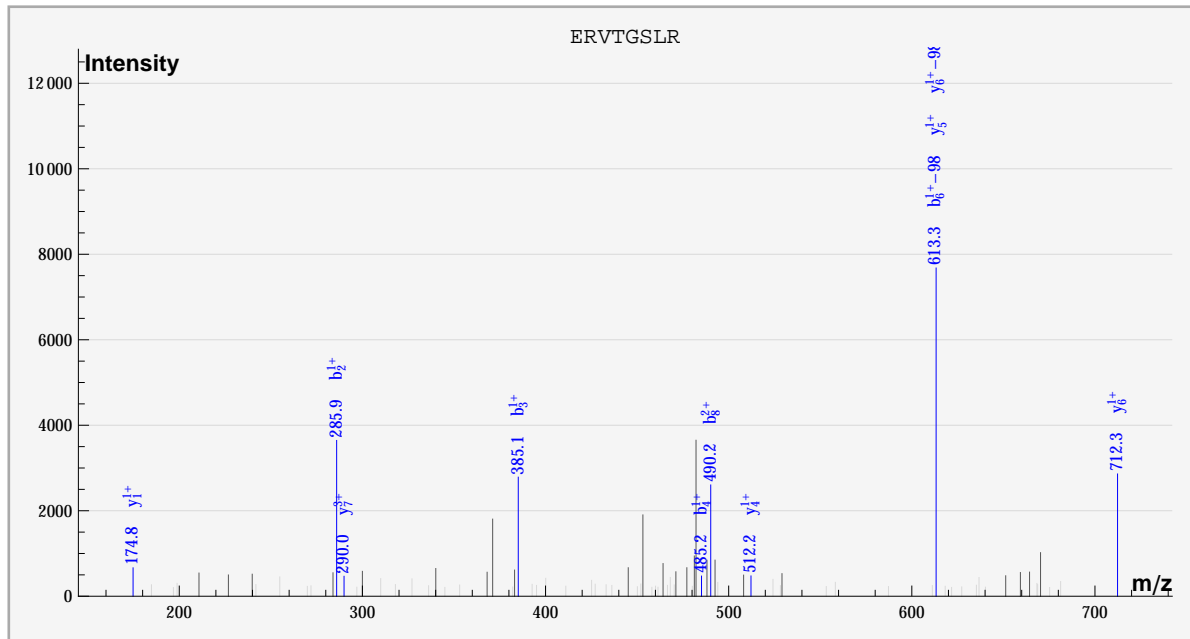

|   | # | b | b* | # | y | y* | P | P* |
|---|---|---|----|---|---|----|---|----|
| E | 1 |   |    |   |   |    |   |    |
| R | 2 | ✓ |    | 7 | ✓ |    |   |    |
| V | 3 | ✓ |    | 6 | ✓ | ✓  |   |    |
| T | 4 | ✓ |    | 5 | ✓ |    |   |    |
| G | 5 |   |    | 4 | ✓ |    |   |    |
| S | 6 |   | ✓  | 3 |   |    |   |    |
| L | 7 |   |    | 2 |   |    |   |    |
| R | 8 | ✓ |    | 1 | ✓ |    |   |    |

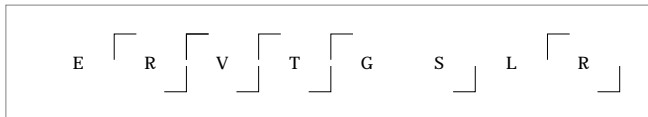

dbValid true NIVETLTK PHOS(1) 2. 501. -1.7481 4.99228 100. ? 2124.  
 S\_Acido\_new%gi|68567263|gb|AAY80192.1| NIVETLTK%::::::PHOS::%sample\_0%cmpd\_720

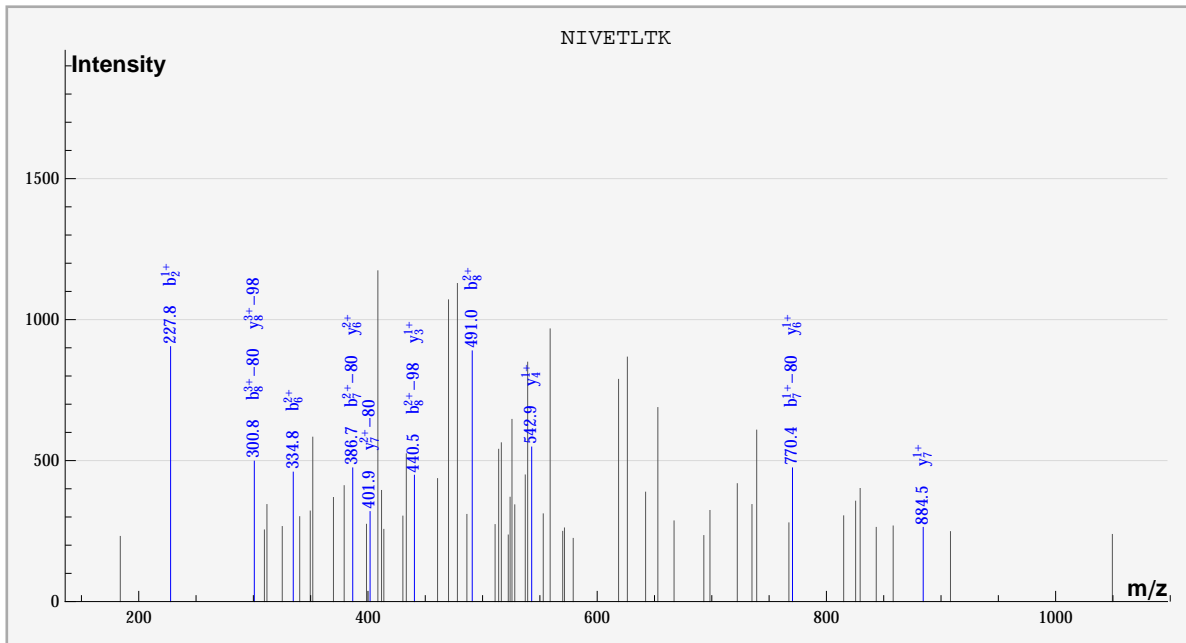

|   | # | b | b* | # | y | y* | P | P* |
|---|---|---|----|---|---|----|---|----|
| N | 1 |   |    |   |   |    |   | ✓  |
| I | 2 | ✓ |    | 7 | ✓ | ✓  |   |    |
| V | 3 |   |    | 6 | ✓ |    |   |    |
| E | 4 |   |    | 5 |   |    |   |    |
| T | 5 |   |    | 4 | ✓ |    |   |    |
| L | 6 | ✓ |    | 3 | ✓ |    |   |    |
| T | 7 |   | ✓  | 2 |   |    |   |    |
| K | 8 | ✓ | ✓  | 1 |   |    |   |    |

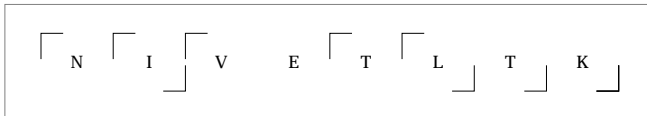

dbValid true ERVTGSLR PHOS(1) 2. 501. -1.75506 5.1593 100. ? 2376.  
 S\_Acido\_new%gi|68567102|gb|AA80031.1| ERVTGSLR%::::::PHOS:::sample\_1%compd\_1060

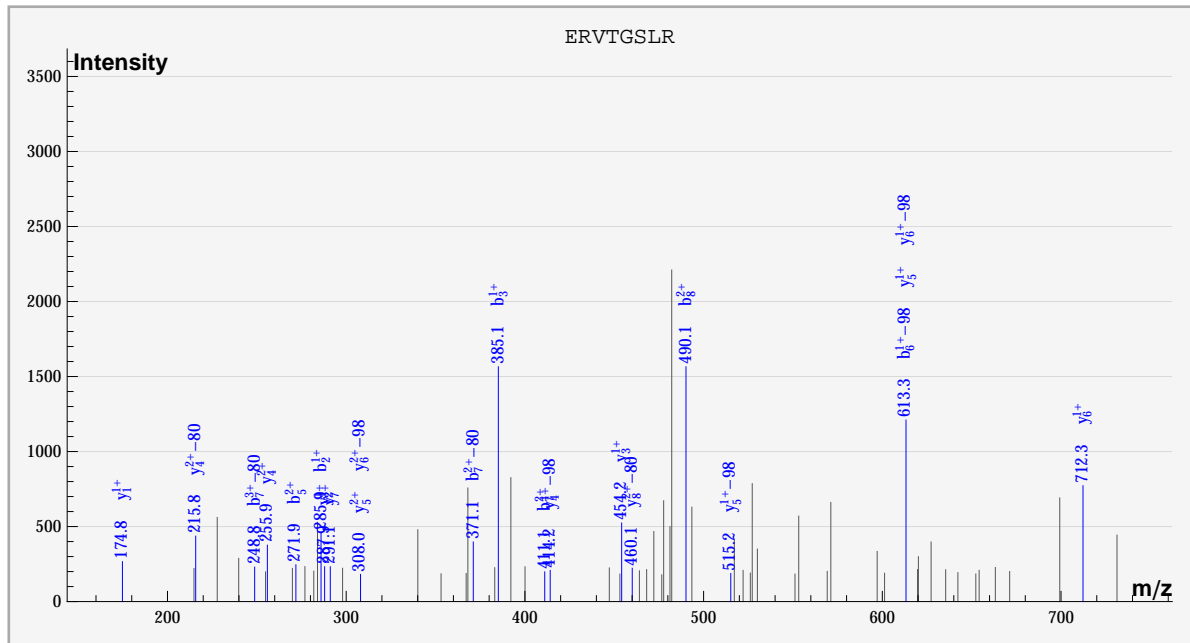

|   | # | b | b* | # | y | y* | P | P* |
|---|---|---|----|---|---|----|---|----|
| E | 1 |   |    |   |   |    |   | ✓  |
| R | 2 | ✓ |    | 7 | ✓ |    |   |    |
| V | 3 | ✓ |    | 6 | ✓ | ✓  |   |    |
| T | 4 |   |    | 5 | ✓ | ✓  |   |    |
| G | 5 | ✓ |    | 4 | ✓ | ✓  |   |    |
| S | 6 |   | ✓  | 3 | ✓ |    |   |    |
| L | 7 | ✓ | ✓  | 2 | ✓ |    |   |    |
| R | 8 | ✓ |    | 1 | ✓ |    |   |    |

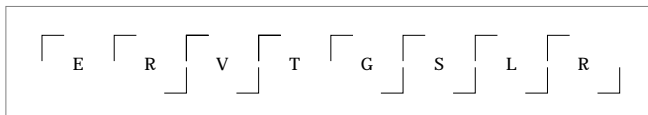

dbValid true TWLMYK PHOS(2) 2. 501. 0.183782 5.19089 100. ? 2394.  
 S\_Acido\_new%gi|68567318|gb|AA80247.1| TWLMYK%:PHOS:::PHOS::%sample\_1%compd\_1000

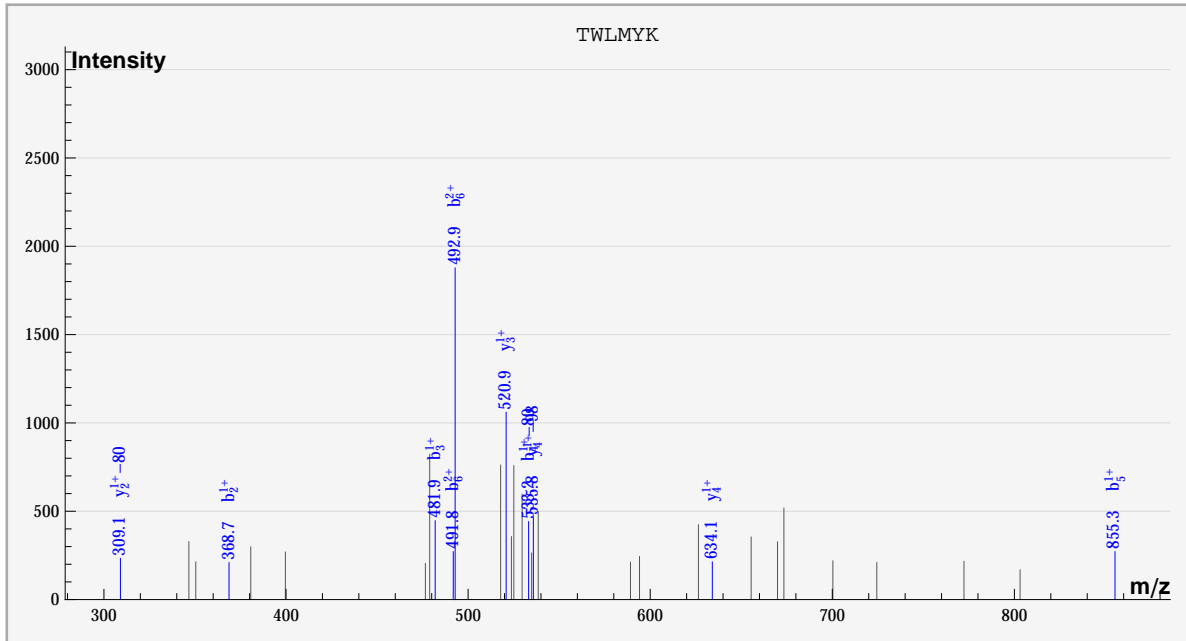

|   | # | b | b* | # | y | y* | P | P* |
|---|---|---|----|---|---|----|---|----|
| T | 1 |   |    |   |   |    |   |    |
| W | 2 | ✓ |    | 5 |   |    |   |    |
| L | 3 | ✓ |    | 4 | ✓ | ✓  |   |    |
| M | 4 |   | ✓  | 3 | ✓ |    |   |    |
| Y | 5 | ✓ |    | 2 |   | ✓  |   |    |
| K | 6 | ✓ |    | 1 |   |    |   |    |

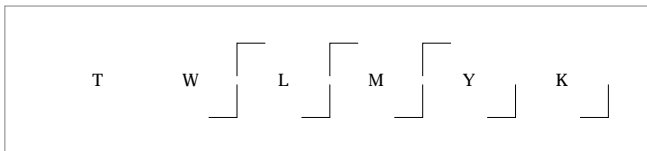

dbConflictWinner true NTASAVSLR PHOS(1) 2. 501. -1.26305 5.52454 100. ? 2436.  
 S\_Acido\_new%gi|68567701|gb|AAY80630.1| NTASAVSLR%::PHOS%:::sample\_0%cmpd\_981

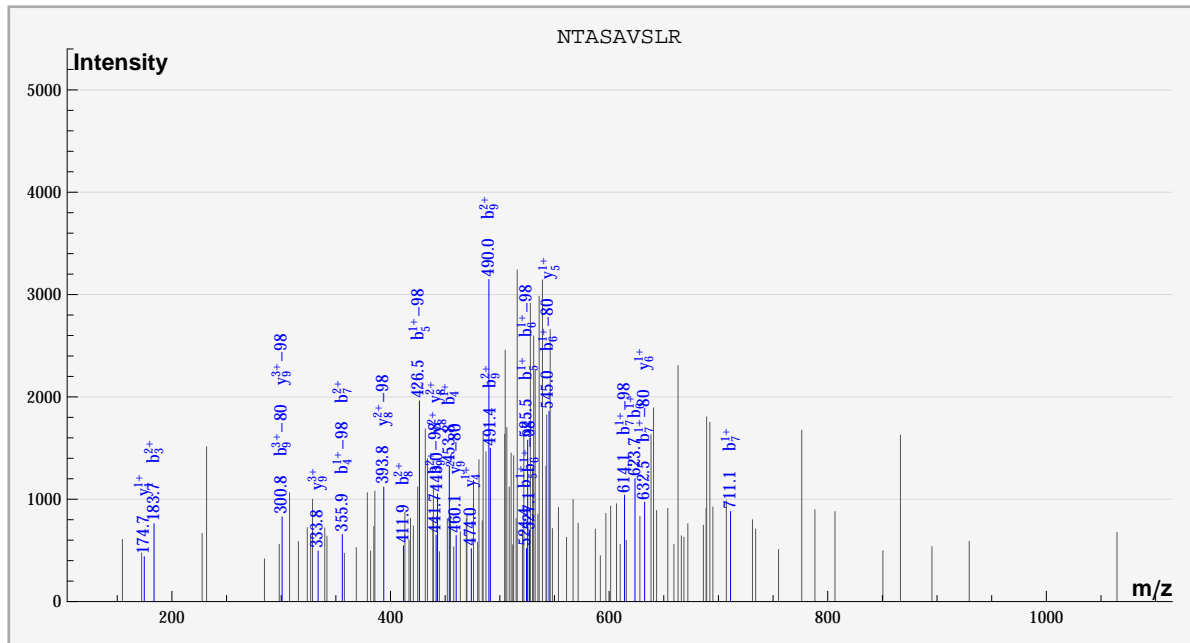

|   | # | b | b* | # | y | y* | P | P* |
|---|---|---|----|---|---|----|---|----|
| N | 1 |   |    |   |   |    | ✓ | ✓  |
| T | 2 |   |    | 8 | ✓ | ✓  |   |    |
| A | 3 | ✓ |    | 7 |   |    |   |    |
| S | 4 | ✓ | ✓  | 6 | ✓ |    |   |    |
| A | 5 | ✓ | ✓  | 5 | ✓ |    |   |    |
| V | 6 | ✓ | ✓  | 4 | ✓ |    |   |    |
| S | 7 | ✓ | ✓  | 3 |   |    |   |    |
| L | 8 | ✓ |    | 2 |   |    |   |    |
| R | 9 | ✓ | ✓  | 1 | ✓ |    |   |    |

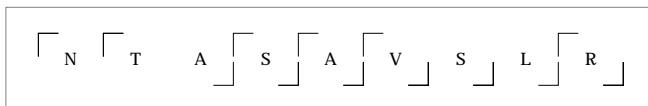

dbValid true ERVTGSLR PHOS(1) 2. 501. -1.75506 5.95858 100. ? 2496.  
 S\_Acido\_new%gi|68567102|gb|AAY80031.1| ERVTGSLR%:::PHOS:::sample\_1%compd\_1169

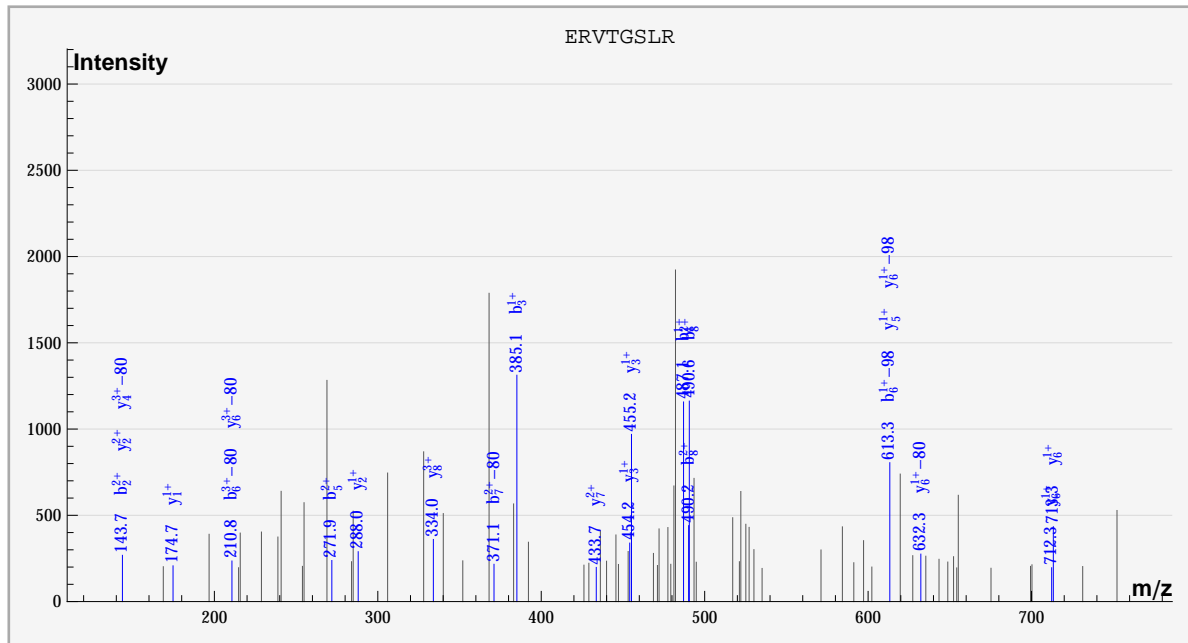

|   | # | b | b* | # | y | y* | P | P* |
|---|---|---|----|---|---|----|---|----|
| E | 1 |   |    |   |   |    |   | ✓  |
| R | 2 | ✓ |    | 7 | ✓ |    |   |    |
| V | 3 | ✓ |    | 6 | ✓ | ✓  |   |    |
| T | 4 | ✓ |    | 5 | ✓ |    |   |    |
| G | 5 | ✓ |    | 4 |   | ✓  |   |    |
| S | 6 |   | ✓  | 3 | ✓ |    |   |    |
| L | 7 |   | ✓  | 2 | ✓ |    |   |    |
| R | 8 | ✓ |    | 1 | ✓ |    |   |    |

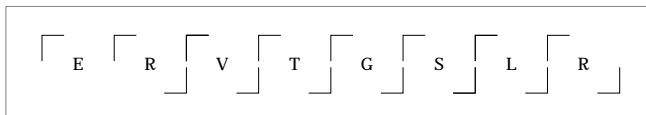

dbValid true YEIALTK PHOS(2) 2. 501. -1.79424 5.24455 100. ? 2556.

S\_Acido\_new%gil68567589|gb|AAY80518.1| YEIALTK%:PHOS:::PHOS::%sample\_0%compd\_1081

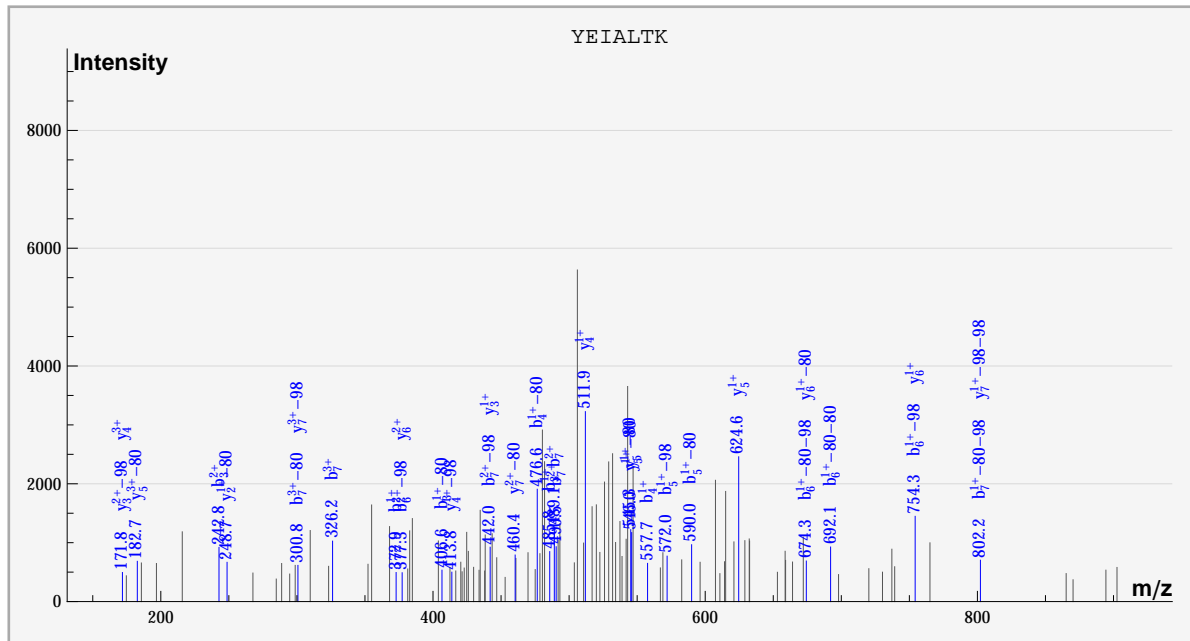

|   | # | b | b* | # | y | y* | P | P* |
|---|---|---|----|---|---|----|---|----|
| Y | 1 |   |    |   |   |    |   | ✓  |
| E | 2 | ✓ |    | 6 | ✓ | ✓  |   |    |
| I | 3 | ✓ | ✓  | 5 | ✓ | ✓  |   |    |
| A | 4 | ✓ | ✓  | 4 | ✓ | ✓  |   |    |
| L | 5 |   | ✓  | 3 | ✓ | ✓  |   |    |
| T | 6 |   | ✓  | 2 |   | ✓  |   |    |
| K | 7 | ✓ | ✓  | 1 |   |    |   |    |

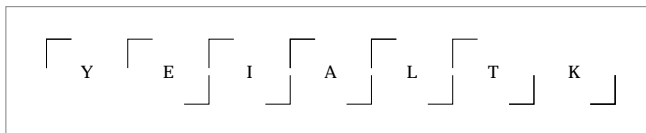



dbValid true RTVDALSR PHOS(1) 2. 501. -1.75506 4.96756 100. ? 2736.

S\_Acido\_new%gi|68567892|gb|AAY80821.1| RTVDALSR%:::::PHOS::%sample\_0%cmpd\_1231

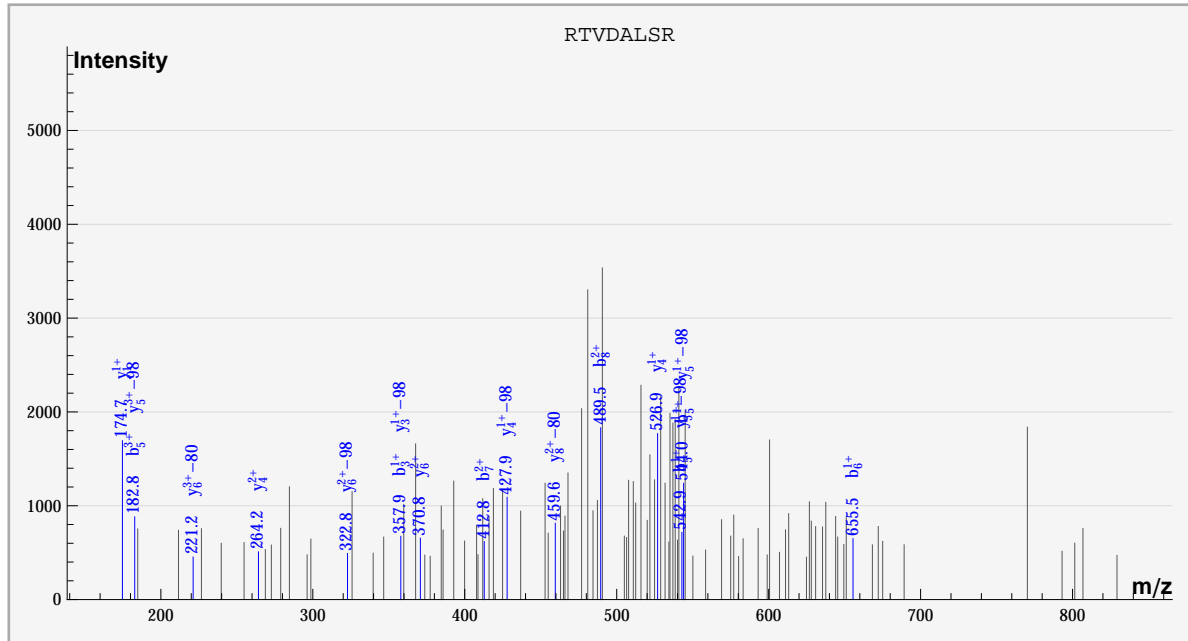

|   | # | b | b* | # | y | y* | P | P* |
|---|---|---|----|---|---|----|---|----|
| R | 1 |   |    |   |   |    |   | ✓  |
| T | 2 |   |    | 7 |   |    |   |    |
| V | 3 | ✓ |    | 6 | ✓ | ✓  |   |    |
| D | 4 |   |    | 5 |   | ✓  |   |    |
| A | 5 | ✓ |    | 4 | ✓ | ✓  |   |    |
| L | 6 | ✓ |    | 3 |   | ✓  |   |    |
| S | 7 | ✓ |    | 2 |   |    |   |    |
| R | 8 | ✓ |    | 1 | ✓ |    |   |    |

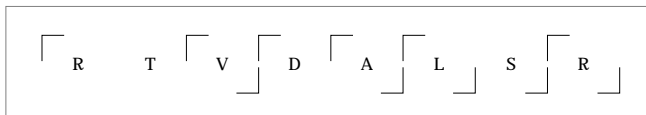

dbValid true ERVTGSLR PHOS(1) 2. 501. -1.75506 5.05244 100. ? 2892.  
 S\_Acido\_new%gi|68567102|gb|AAY80031.1| ERVTGSLR%:::::PHOS:::sample\_0%compd\_1361

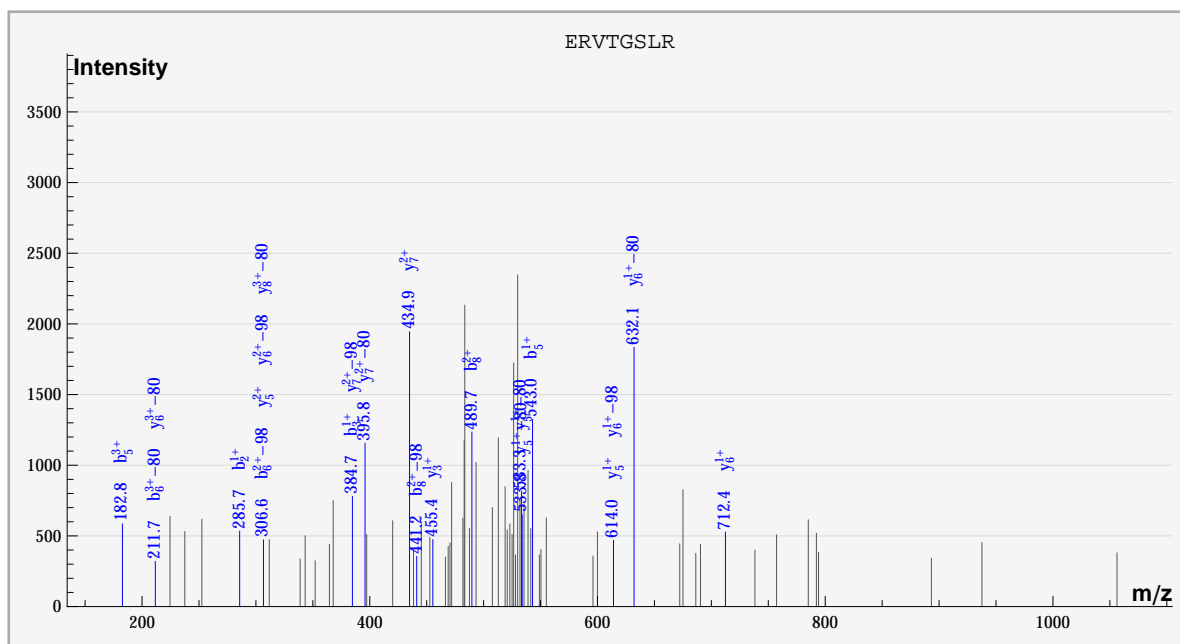

|   | # | b | b* | # | y | y* | P | P* |
|---|---|---|----|---|---|----|---|----|
| E | 1 |   |    |   |   |    |   | ✓  |
| R | 2 | ✓ |    | 7 | ✓ | ✓  |   |    |
| V | 3 | ✓ |    | 6 | ✓ | ✓  |   |    |
| T | 4 |   |    | 5 | ✓ | ✓  |   |    |
| G | 5 | ✓ |    | 4 |   |    |   |    |
| S | 6 |   | ✓  | 3 | ✓ |    |   |    |
| L | 7 |   |    | 2 |   |    |   |    |
| R | 8 | ✓ | ✓  | 1 |   |    |   |    |

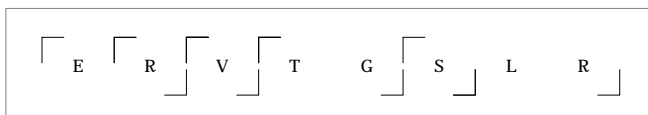

dbValid true RTVDALSR PHOS(1) 2. 501. -1.75506 4.98728 100. ? 3168.

S\_Acido\_new%gi|68567892|gb|AAY80821.1| RTVDALSR%:::::PHOS::%sample\_0%cmpd\_1591

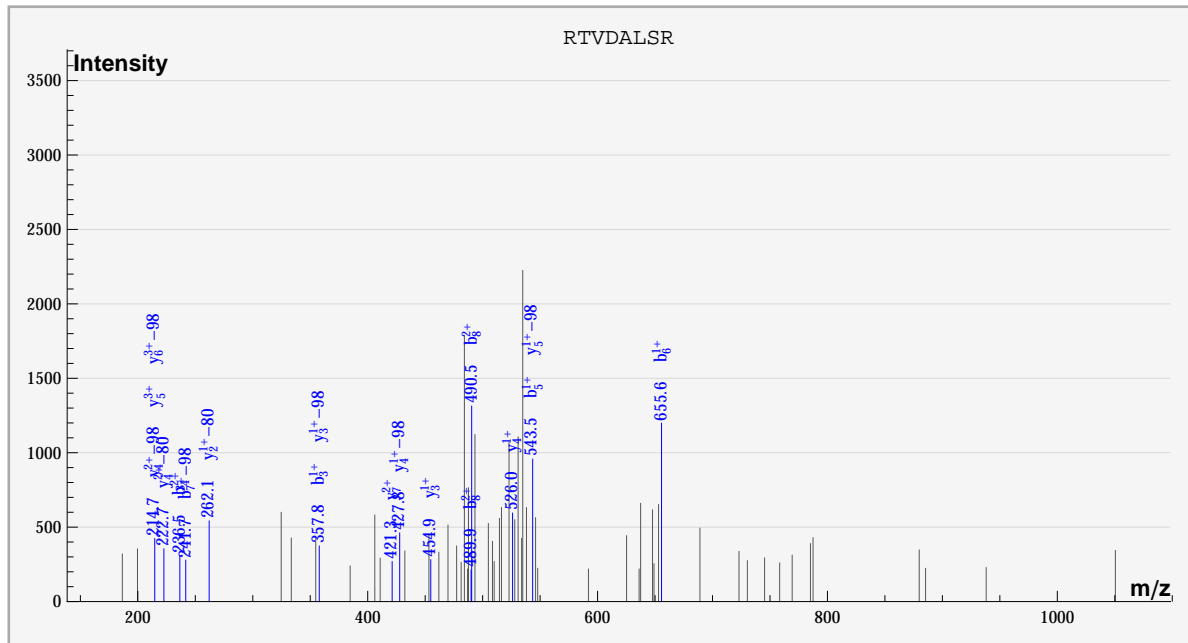

|   | # | b | b* | # | y | y* | P | P* |
|---|---|---|----|---|---|----|---|----|
| R | 1 |   |    |   |   |    |   |    |
| T | 2 |   |    | 7 | ✓ |    |   |    |
| V | 3 | ✓ |    | 6 |   | ✓  |   |    |
| D | 4 | ✓ |    | 5 | ✓ | ✓  |   |    |
| A | 5 | ✓ |    | 4 | ✓ | ✓  |   |    |
| L | 6 | ✓ |    | 3 | ✓ | ✓  |   |    |
| S | 7 |   | ✓  | 2 |   | ✓  |   |    |
| R | 8 | ✓ |    | 1 |   |    |   |    |

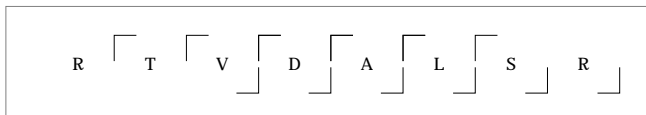

dbValid true SSADV VSR PHOS(1) 2. 502. -1.77104 5.03735 100. ? 2724.  
 S\_Acido\_new%gil68568215|gb|AAy81144.1| SSADV VSR%:::::PHOS::%sample\_0%cmpd\_1222

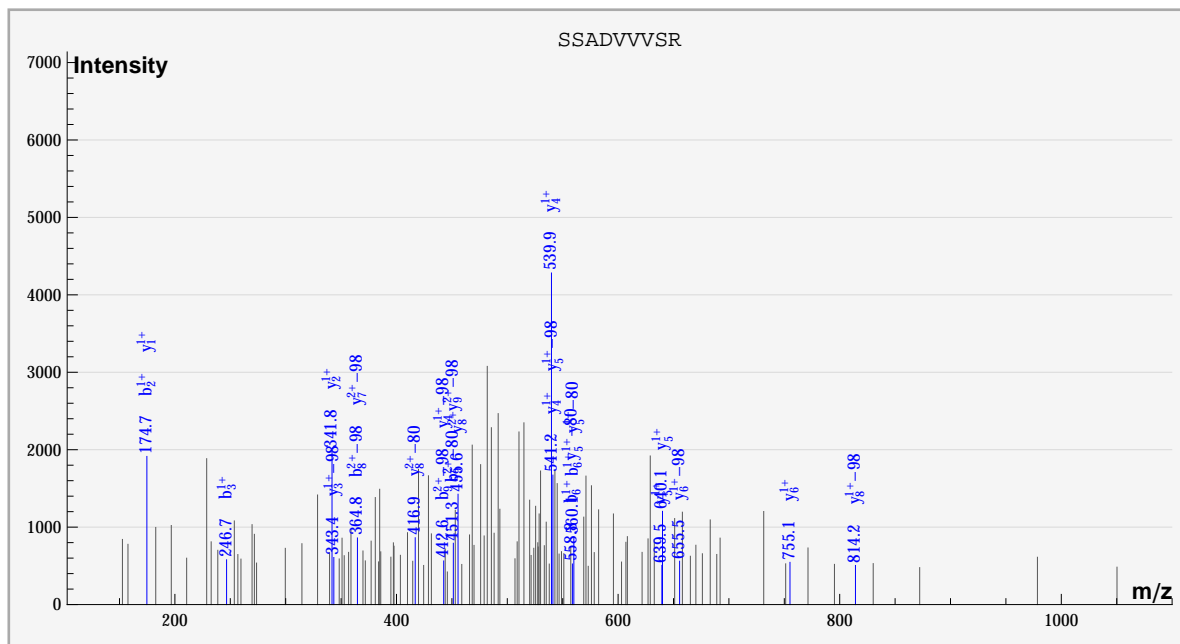

|   | # | b | b* | # | y | y* | P | P* |
|---|---|---|----|---|---|----|---|----|
| S | 1 |   |    |   |   |    |   | ✓  |
| S | 2 | ✓ |    | 8 | ✓ | ✓  |   |    |
| A | 3 | ✓ |    | 7 |   | ✓  |   |    |
| D | 4 |   |    | 6 | ✓ | ✓  |   |    |
| V | 5 |   |    | 5 | ✓ | ✓  |   |    |
| V | 6 | ✓ |    | 4 | ✓ | ✓  |   |    |
| V | 7 |   |    | 3 |   | ✓  |   |    |
| S | 8 |   | ✓  | 2 | ✓ |    |   |    |
| R | 9 |   | ✓  | 1 | ✓ |    |   |    |

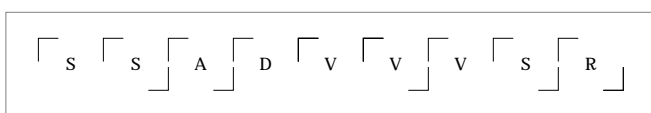

dbValid true ELAEGDASK PHOS(1) 2. 502. -1.79486 4.89305 100. ? 4122.  
 S\_Acido\_new%gi|68567156|gb|AA80085.1| ELAEGDASK%:::PHOS::%sample\_0%compd\_2383

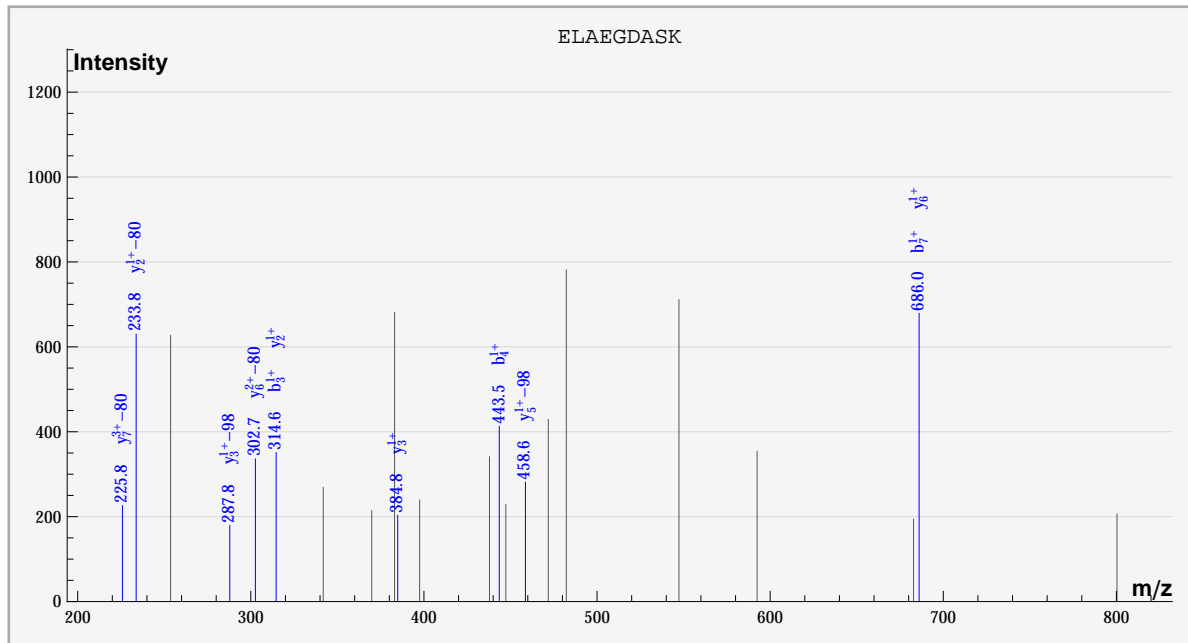

|   | # | b | b* | # | y | y* | P | P* |
|---|---|---|----|---|---|----|---|----|
| E | 1 |   |    |   |   |    |   |    |
| L | 2 |   |    | 8 |   |    |   |    |
| A | 3 | ✓ |    | 7 |   | ✓  |   |    |
| E | 4 | ✓ |    | 6 | ✓ | ✓  |   |    |
| G | 5 |   |    | 5 |   | ✓  |   |    |
| D | 6 |   |    | 4 |   |    |   |    |
| A | 7 | ✓ |    | 3 | ✓ | ✓  |   |    |
| S | 8 |   |    | 2 | ✓ | ✓  |   |    |
| K | 9 |   |    | 1 |   |    |   |    |

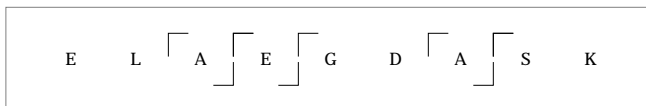

dbValid true YVLANDVK PHOS(1) 2. 503. -1.76121 4.92096 100. ? 1662.  
 S\_Acido\_new%gi|68566978|gb|AAY79907.1| YVLANDVK%:PHOS:::sample\_1%compd\_375

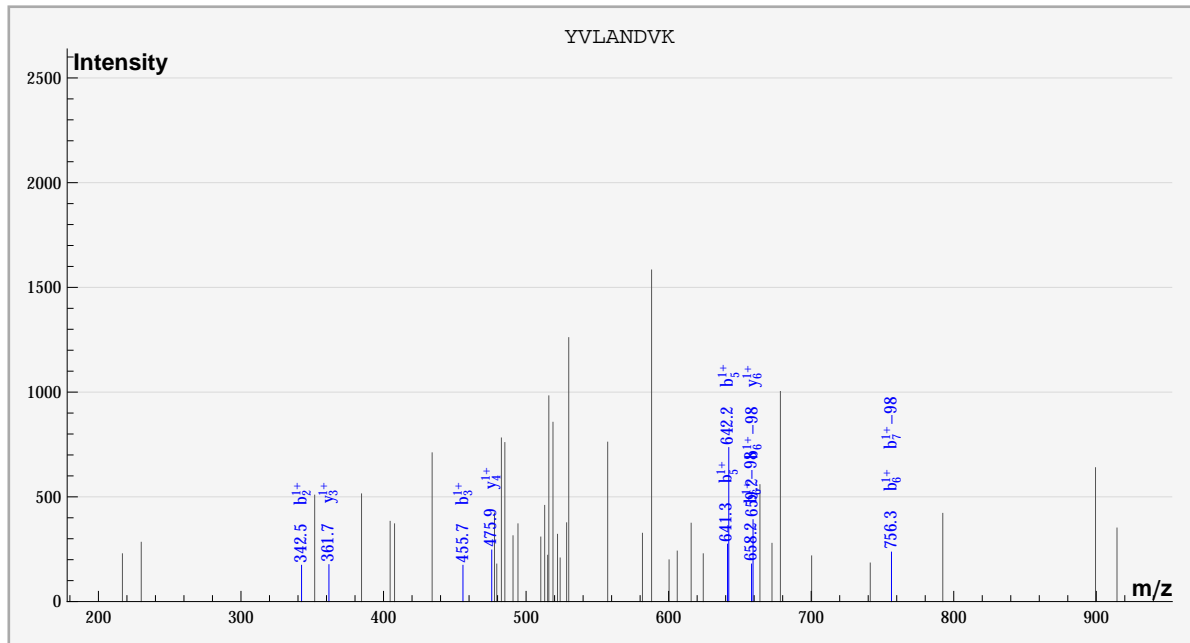

|   | # | b | b* | # | y | y* | P | P* |
|---|---|---|----|---|---|----|---|----|
| Y | 1 |   |    |   |   |    |   |    |
| V | 2 | ✓ |    | 7 |   |    |   |    |
| L | 3 | ✓ |    | 6 | ✓ |    |   |    |
| A | 4 |   |    | 5 |   |    |   |    |
| N | 5 | ✓ |    | 4 | ✓ |    |   |    |
| D | 6 | ✓ | ✓  | 3 | ✓ |    |   |    |
| V | 7 |   | ✓  | 2 |   |    |   |    |
| K | 8 |   |    | 1 |   |    |   |    |

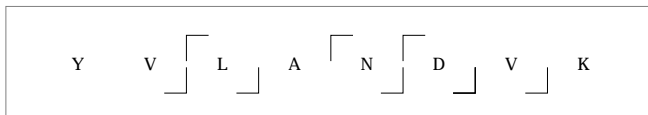

dbValid true QYGSSSR PHOS(2) 2. 503. -1.84012 5.07982 100. ? 2316.  
 S\_Acido\_new%gil68567631|gb|AAY80560.1| QYGSSSR%::PHOS:::PHOS::%sample\_0%cmpd\_883

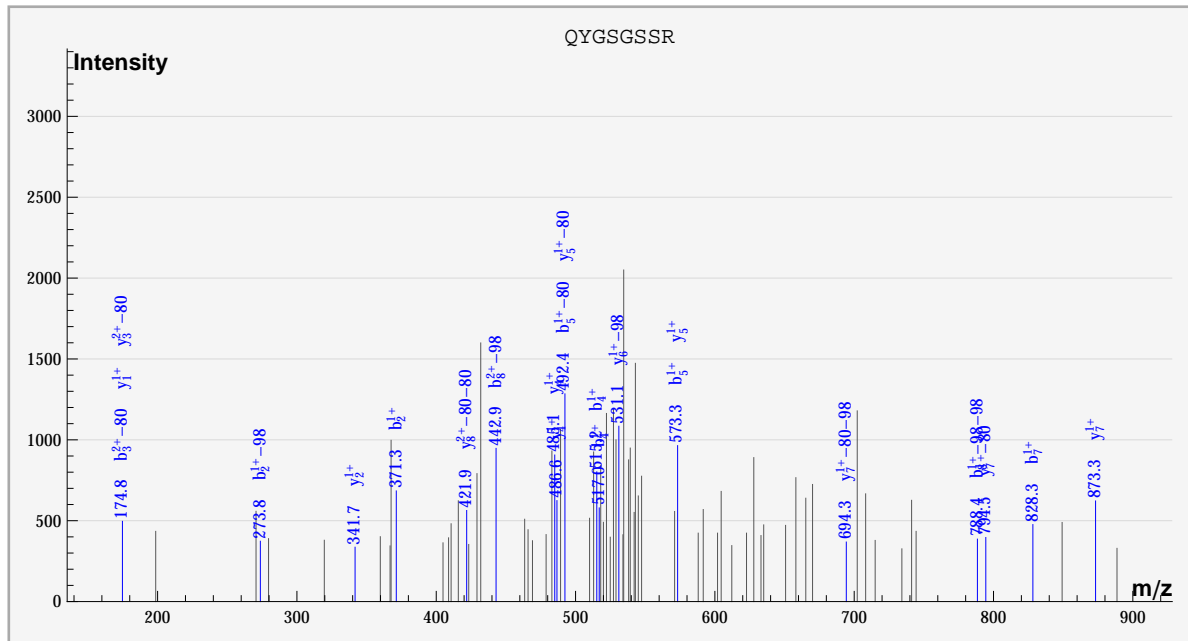

|   | # | b | b* | # | y | y* | P | P* |
|---|---|---|----|---|---|----|---|----|
| Q | 1 |   |    |   |   |    |   | ✓  |
| Y | 2 | ✓ | ✓  | 7 | ✓ | ✓  |   |    |
| G | 3 |   | ✓  | 6 |   | ✓  |   |    |
| S | 4 | ✓ |    | 5 | ✓ | ✓  |   |    |
| G | 5 | ✓ | ✓  | 4 | ✓ |    |   |    |
| S | 6 |   |    | 3 |   | ✓  |   |    |
| S | 7 | ✓ |    | 2 | ✓ |    |   |    |
| R | 8 |   | ✓  | 1 | ✓ |    |   |    |

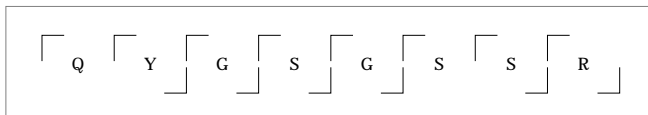

dbValid true MKLTSVSR PHOS(1) 2. 503. -1.7539 4.9911 100. ? 3294.  
 S\_Acido\_new%gi|68566865|gb|AA79794.1| MKLTSVSR%::::::PHOS::%sample\_0%compd\_1693

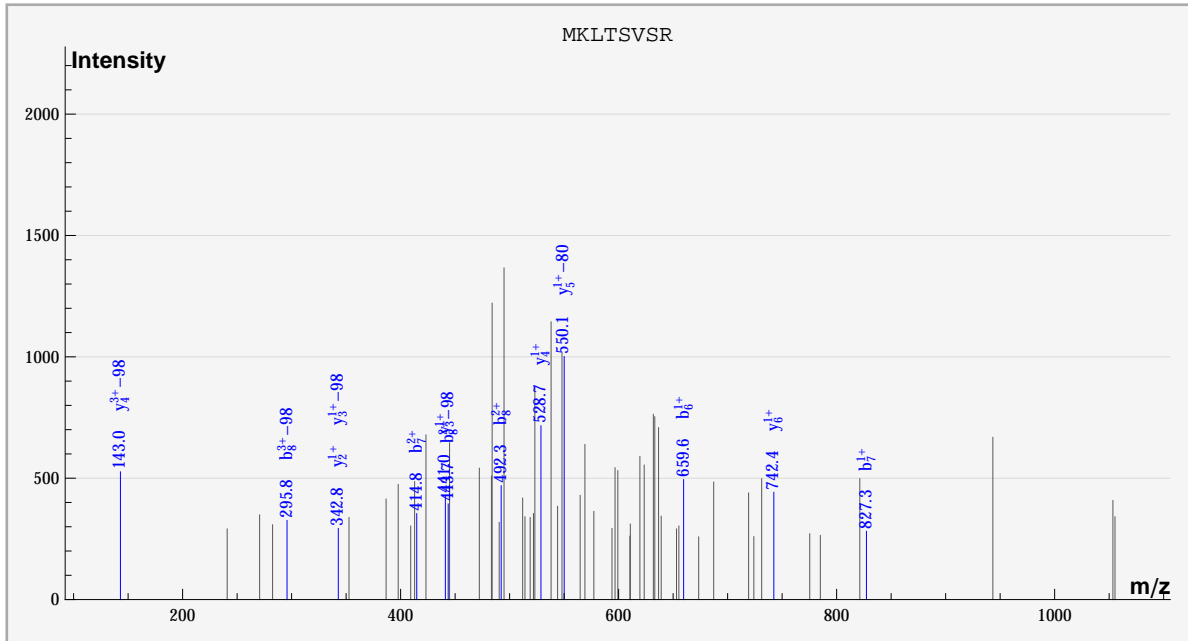

|   | # | b | b* | # | y | y* | P | P* |
|---|---|---|----|---|---|----|---|----|
| M | 1 |   |    |   |   |    |   |    |
| K | 2 |   |    | 7 |   |    |   |    |
| L | 3 |   |    | 6 | ✓ |    |   |    |
| T | 4 |   |    | 5 |   | ✓  |   |    |
| S | 5 |   |    | 4 | ✓ | ✓  |   |    |
| V | 6 | ✓ |    | 3 | ✓ | ✓  |   |    |
| S | 7 | ✓ |    | 2 | ✓ |    |   |    |
| R | 8 | ✓ | ✓  | 1 |   |    |   |    |

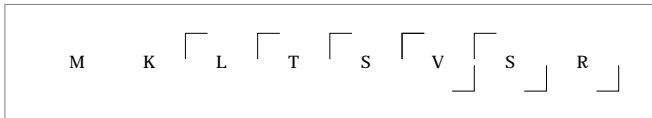



dbValid true LPVQSTRK PHOS(1) 2. 503. 1.76551 5.31571 100. ? 3474.  
 S\_Acido\_new%gi|68566815|gb|AA79744.1| LPVQSTRK%:::::PHOS:::%sample\_0%cmpd\_1844

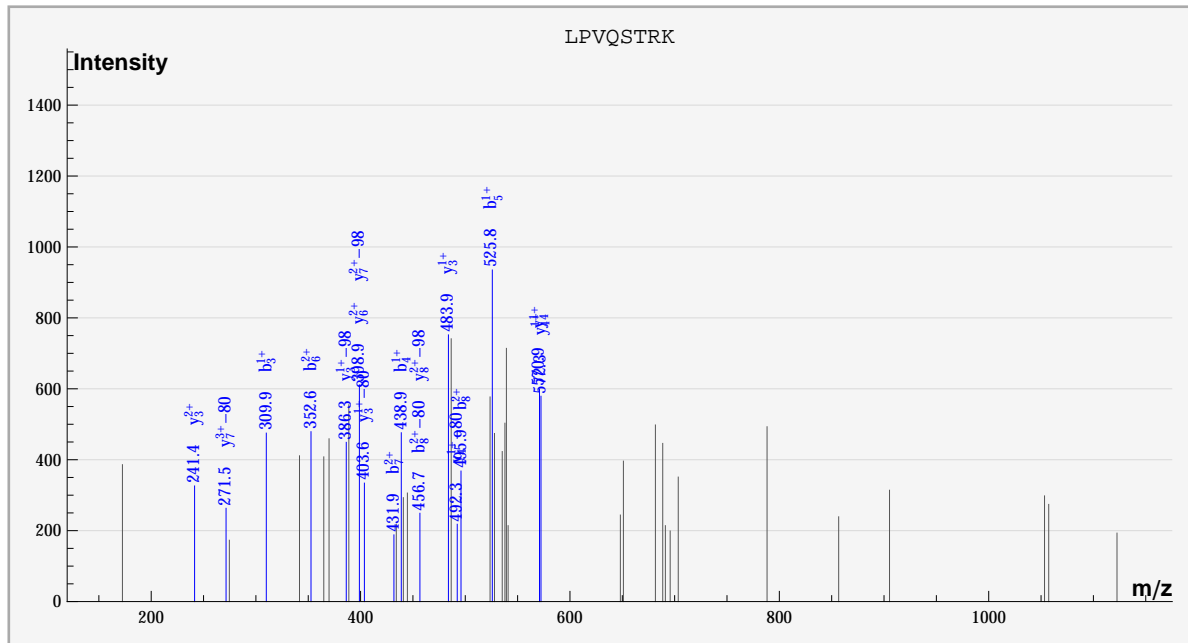

|   | # | b | b* | # | y | y* | P | P* |
|---|---|---|----|---|---|----|---|----|
| L | 1 |   |    |   |   |    |   | ✓  |
| P | 2 |   |    | 7 |   | ✓  |   |    |
| V | 3 | ✓ |    | 6 | ✓ |    |   |    |
| Q | 4 | ✓ |    | 5 |   |    |   |    |
| S | 5 | ✓ |    | 4 | ✓ | ✓  |   |    |
| T | 6 | ✓ |    | 3 | ✓ | ✓  |   |    |
| R | 7 | ✓ |    | 2 |   |    |   |    |
| K | 8 | ✓ | ✓  | 1 |   |    |   |    |

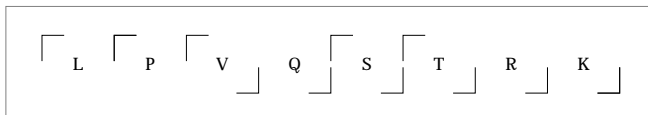

dbValid true RSETIYR PHOS(1) 2. 504. -1.26833 4.98504 100. ? 1386.  
 S\_Acido\_new%gi|68567025|gb|AA79954.1| RSETIYR%:::::PHOS::%sample\_1%compd\_160

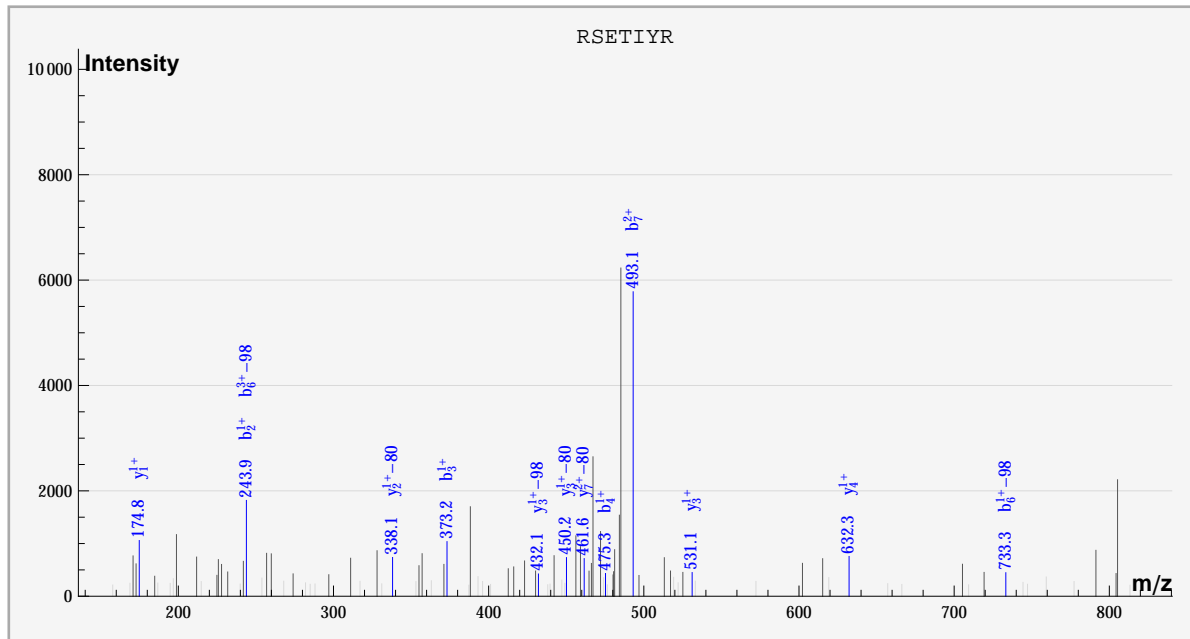

|   | # | b | b* | # | y | y* | P | P* |
|---|---|---|----|---|---|----|---|----|
| R | 1 |   |    |   |   |    |   | ✓  |
| S | 2 | ✓ |    | 6 |   |    |   |    |
| E | 3 | ✓ |    | 5 |   |    |   |    |
| T | 4 | ✓ |    | 4 | ✓ |    |   |    |
| I | 5 |   |    | 3 | ✓ | ✓  |   |    |
| Y | 6 |   | ✓  | 2 |   | ✓  |   |    |
| R | 7 | ✓ |    | 1 | ✓ |    |   |    |

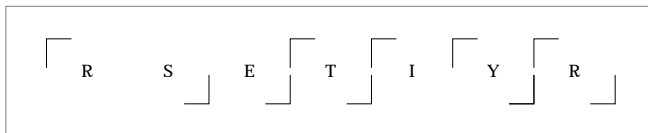

dbValid true RSETIYR PHOS(1) 2. 504. -1.26833 5.95342 100. ? 1710.  
 S\_Acido\_new%gi|68567025|gb|AAY79954.1| RSETIYR%:::::PHOS::%sample\_1%compd\_418

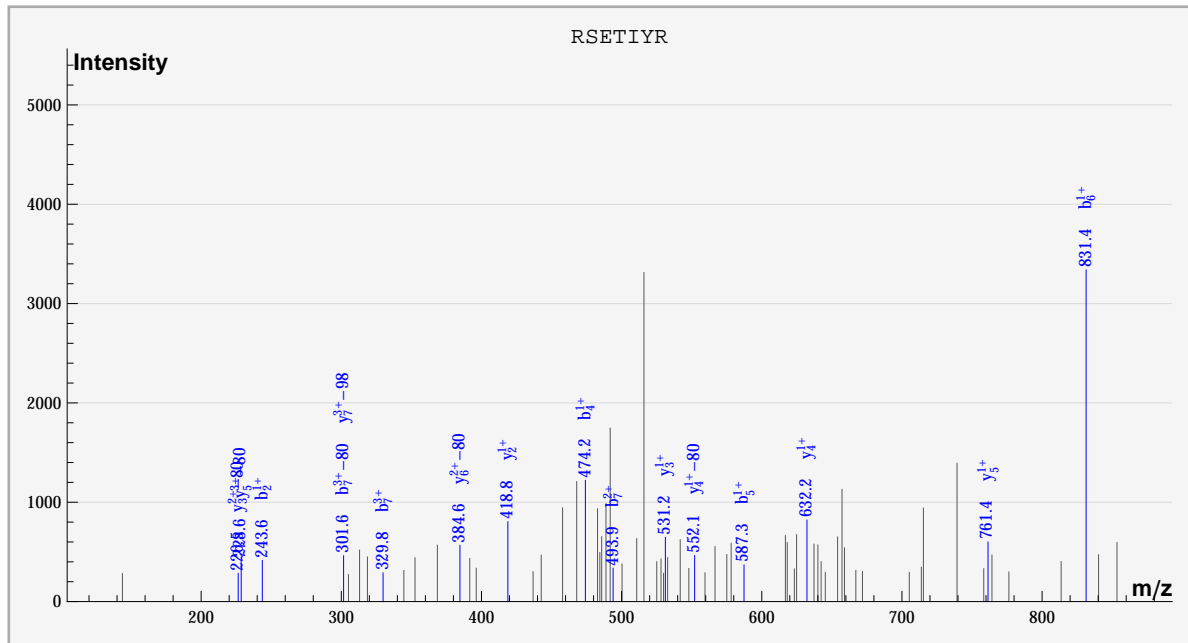

|   | # | b | b* | # | y | y* | P | P* |
|---|---|---|----|---|---|----|---|----|
| R | 1 |   |    |   |   |    |   | ✓  |
| S | 2 | ✓ |    | 6 |   | ✓  |   |    |
| E | 3 |   |    | 5 | ✓ | ✓  |   |    |
| T | 4 | ✓ |    | 4 | ✓ | ✓  |   |    |
| I | 5 | ✓ |    | 3 | ✓ | ✓  |   |    |
| Y | 6 | ✓ |    | 2 | ✓ |    |   |    |
| R | 7 | ✓ | ✓  | 1 |   |    |   |    |

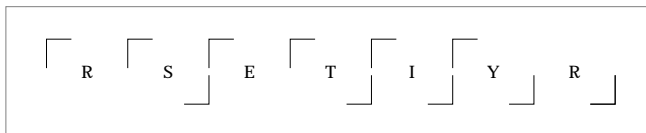

dbValid true MKALGYAR Oxidation\_M(1),PHOS(1) 2. 504. -0.767018 4.94615 100. ? 1794.  
 S\_Acido\_new%gil68567094|gb|AAY80023.1| MKALGYAR%:Oxidation\_M::::PHOS:::%sample\_1%compd\_490

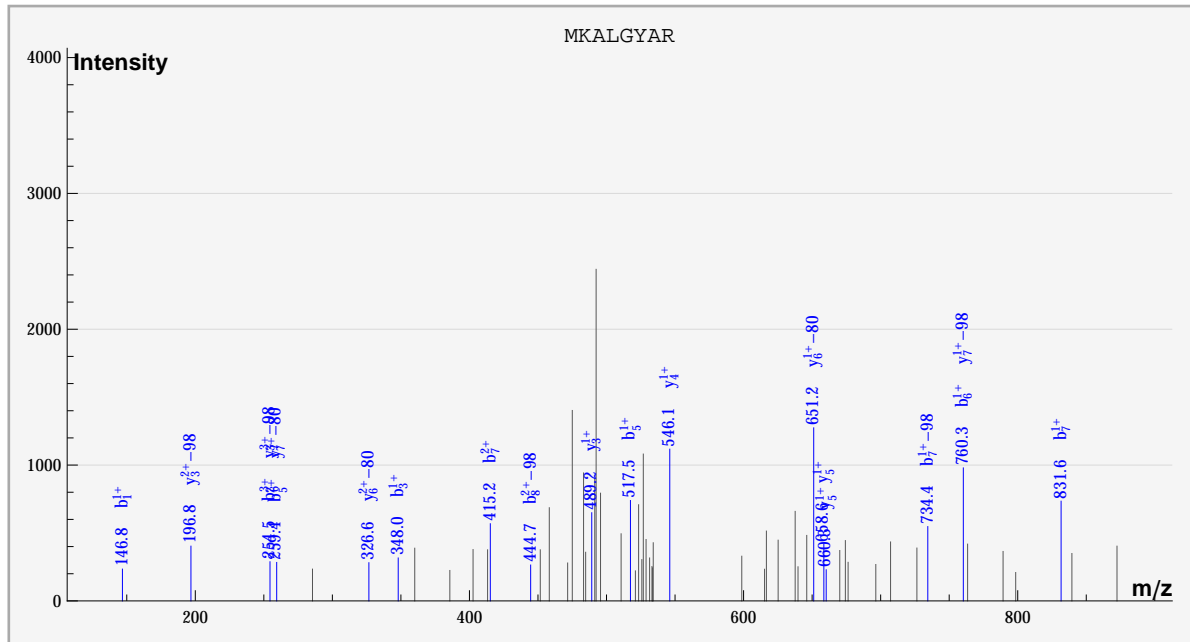

|   | # | b | b* | # | y | y* | P | P* |
|---|---|---|----|---|---|----|---|----|
| M | 1 |   | ✓  |   |   |    |   |    |
| K | 2 |   |    | 7 |   | ✓  |   |    |
| A | 3 | ✓ |    | 6 |   | ✓  |   |    |
| L | 4 |   |    | 5 | ✓ |    |   |    |
| G | 5 | ✓ |    | 4 | ✓ |    |   |    |
| Y | 6 | ✓ |    | 3 | ✓ | ✓  |   |    |
| A | 7 | ✓ | ✓  | 2 |   |    |   |    |
| R | 8 |   | ✓  | 1 |   |    |   |    |

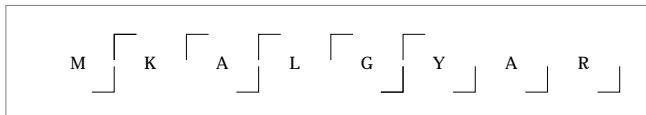

dbValid true ESIHSISR PHOS(1) 2. 504. 0.729127 5.35303 100. ? 2196.  
 S\_Acido\_new%gi|68568003|gb|AAY80932.1| ESIHSISR%::::::PHOS::%sample\_0%cmpd\_784

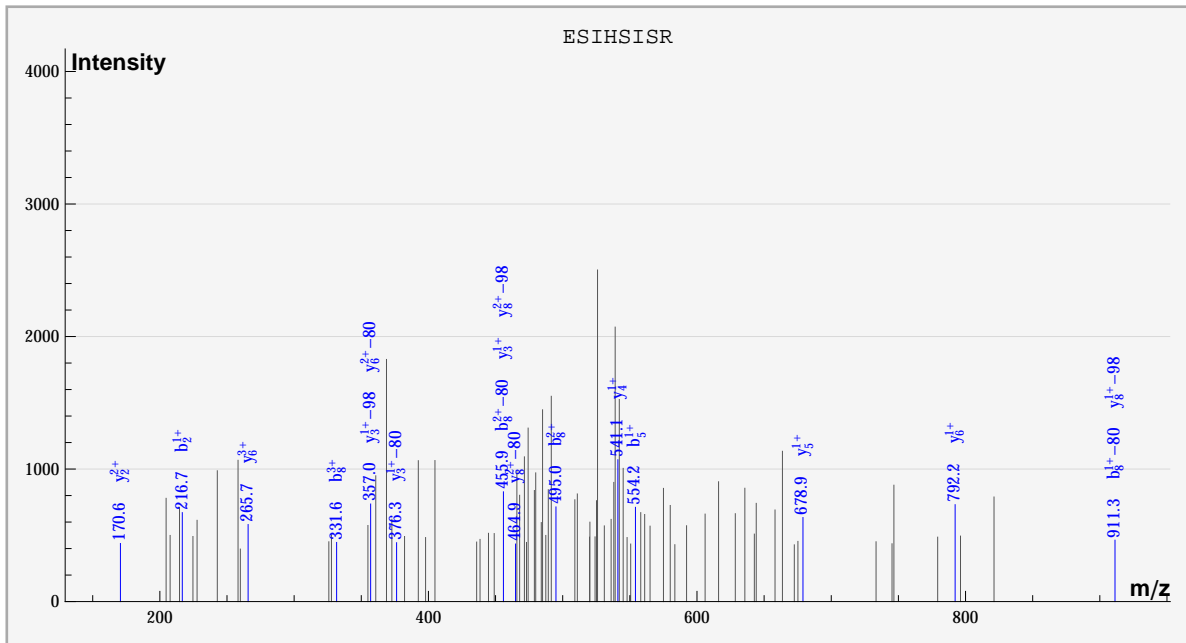

|   | # | b | b* | # | y | y* | P | P* |
|---|---|---|----|---|---|----|---|----|
| E | 1 |   |    |   |   |    |   | ✓  |
| S | 2 | ✓ |    | 7 |   |    |   |    |
| I | 3 |   |    | 6 | ✓ | ✓  |   |    |
| H | 4 |   |    | 5 | ✓ |    |   |    |
| S | 5 | ✓ |    | 4 | ✓ |    |   |    |
| I | 6 |   |    | 3 | ✓ | ✓  |   |    |
| S | 7 |   |    | 2 | ✓ |    |   |    |
| R | 8 | ✓ | ✓  | 1 |   |    |   |    |

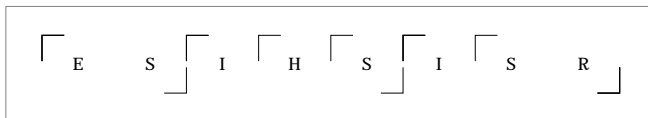

dbValid true SLISGSRK PHOS(2) 2. 504. 0.219737 5.0341 100. ? 2592.  
 S\_Acido\_new%gi|68567524|gb|AAy80453.1| SLISGSRK%:PHOS:::::PHOS:::::sample\_0%compd\_1114

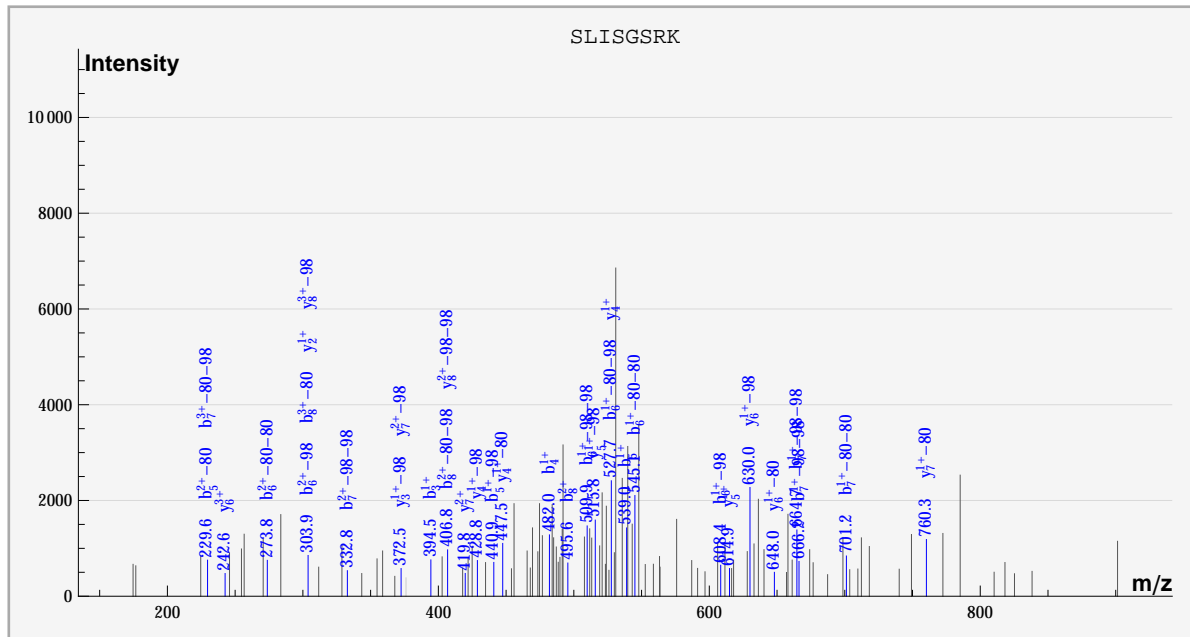

|   | # | b | b* | # | y | y* | P | P* |
|---|---|---|----|---|---|----|---|----|
| S | 1 |   |    |   |   |    |   | ✓  |
| L | 2 |   |    | 7 | ✓ | ✓  |   |    |
| I | 3 | ✓ |    | 6 | ✓ | ✓  |   |    |
| S | 4 | ✓ |    | 5 | ✓ | ✓  |   |    |
| G | 5 | ✓ | ✓  | 4 | ✓ | ✓  |   |    |
| S | 6 |   | ✓  | 3 |   | ✓  |   |    |
| R | 7 |   | ✓  | 2 | ✓ |    |   |    |
| K | 8 | ✓ | ✓  | 1 |   |    |   |    |

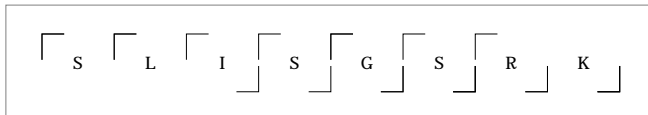

dbValid true KLNGIISGK PHOS(1) 2. 504. 1.27571 5.10334 100. ? 2874.  
 S\_Acido\_new%gi|68567776|gb|AAy80705.1| KLNGIISGK%::::::PHOS:::sample\_1%compd\_1505

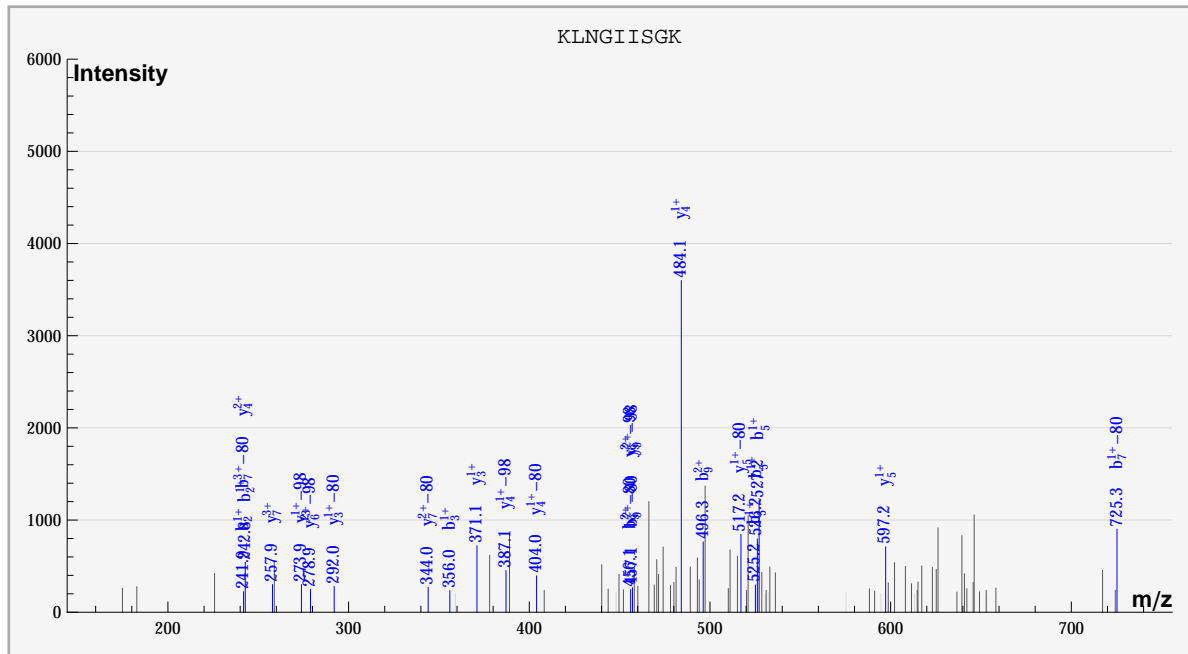

|   | # | b | b* | # | y | y* | P | P* |
|---|---|---|----|---|---|----|---|----|
| K | 1 |   |    |   |   |    |   | ✓  |
| L | 2 | ✓ |    | 8 |   |    |   |    |
| N | 3 | ✓ |    | 7 | ✓ | ✓  |   |    |
| G | 4 |   |    | 6 |   | ✓  |   |    |
| I | 5 | ✓ |    | 5 | ✓ | ✓  |   |    |
| I | 6 |   |    | 4 | ✓ | ✓  |   |    |
| S | 7 |   | ✓  | 3 | ✓ | ✓  |   |    |
| G | 8 |   |    | 2 |   |    |   |    |
| K | 9 | ✓ | ✓  | 1 |   |    |   |    |

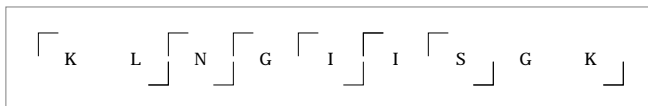

dbValid true VYGYAEVK PHOS(1) 2. 504. 0.725517 5.54294 100. ? 3108.  
 S\_Acido\_new%gi|68566632|gb|AAY79561.1| VYGYAEVK%::PHOS:::::%sample\_0%cmpd\_1544

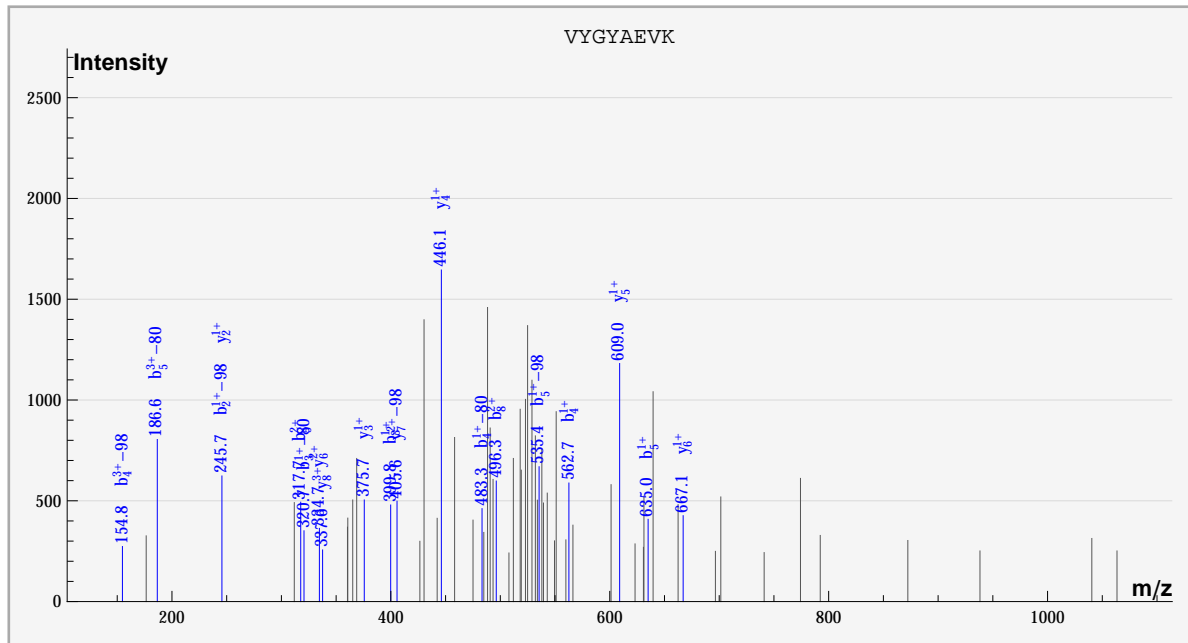

|   | # | b | b* | # | y | y* | P | P* |
|---|---|---|----|---|---|----|---|----|
| V | 1 |   |    |   |   |    | ✓ |    |
| Y | 2 |   | ✓  | 7 |   | ✓  |   |    |
| G | 3 | ✓ | ✓  | 6 | ✓ |    |   |    |
| Y | 4 | ✓ | ✓  | 5 | ✓ |    |   |    |
| A | 5 | ✓ | ✓  | 4 | ✓ |    |   |    |
| E | 6 |   |    | 3 | ✓ |    |   |    |
| V | 7 |   |    | 2 | ✓ |    |   |    |
| K | 8 | ✓ |    | 1 |   |    |   |    |

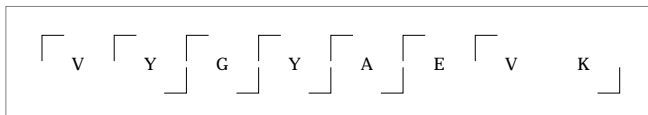



dbValid true YLDFNEK PHOS(1) 2. 504. 0.707327 5.13539 100. ? 3654.  
 S\_Acido\_new%gi|68567120|gb|AAY80049.1| YLDFNEK%:PHOS::::::%sample\_0%compd\_1995

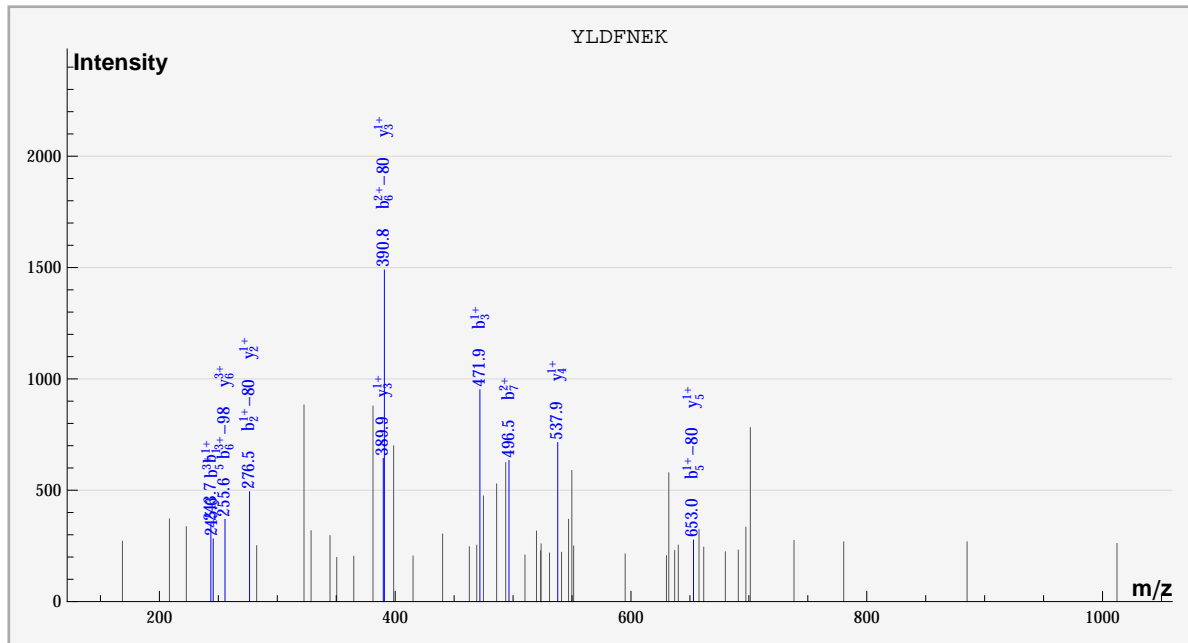

|   | # | b | b* | # | y | y* | P | P* |
|---|---|---|----|---|---|----|---|----|
| Y | 1 | ✓ |    |   |   |    |   |    |
| L | 2 |   | ✓  | 6 | ✓ |    |   |    |
| D | 3 | ✓ |    | 5 | ✓ |    |   |    |
| F | 4 |   |    | 4 | ✓ |    |   |    |
| N | 5 | ✓ | ✓  | 3 | ✓ |    |   |    |
| E | 6 |   | ✓  | 2 | ✓ |    |   |    |
| K | 7 | ✓ |    | 1 |   |    |   |    |

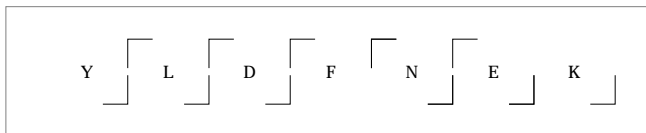

dbValid true KLSRSVR PHOS(2) 2. 505. -1.76428 4.95319 100. ? 1638.  
 S\_Acido\_new%gii68567564|gb|AAy80493.1| KLSRSVR%:::PHOS::PHOS:::sample\_1%compd\_356

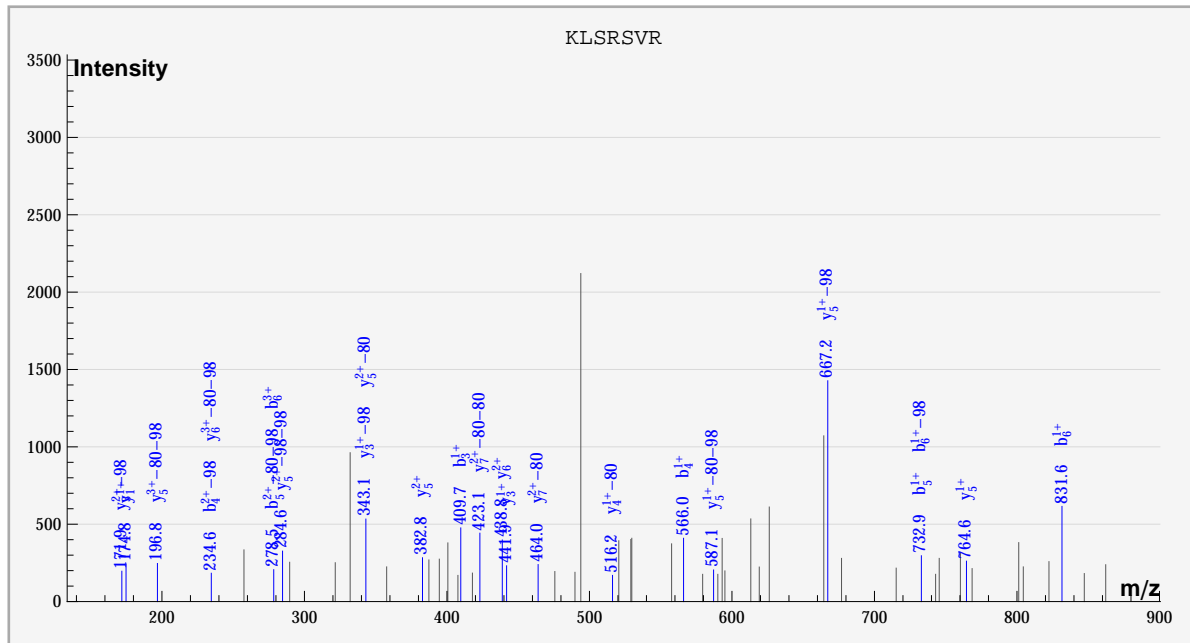

|   | # | b | b* | # | y | y* | P | P* |
|---|---|---|----|---|---|----|---|----|
| K | 1 |   |    |   |   |    |   | ✓  |
| L | 2 |   |    | 6 | ✓ | ✓  |   |    |
| S | 3 | ✓ |    | 5 | ✓ | ✓  |   |    |
| R | 4 | ✓ | ✓  | 4 |   | ✓  |   |    |
| S | 5 | ✓ | ✓  | 3 | ✓ | ✓  |   |    |
| V | 6 | ✓ | ✓  | 2 |   |    |   |    |
| R | 7 |   |    | 1 | ✓ |    |   |    |

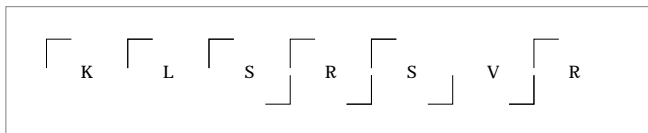

dbValid true SIGVGGISR PHOS(2) 2. 505. -1.78809 5.29539 100. ? 1668.  
 S\_Acido\_new%gi|68567208|gb|AAy80137.1| SIGVGGISR%:PHOS:::PHOS::%sample\_0%compd\_344

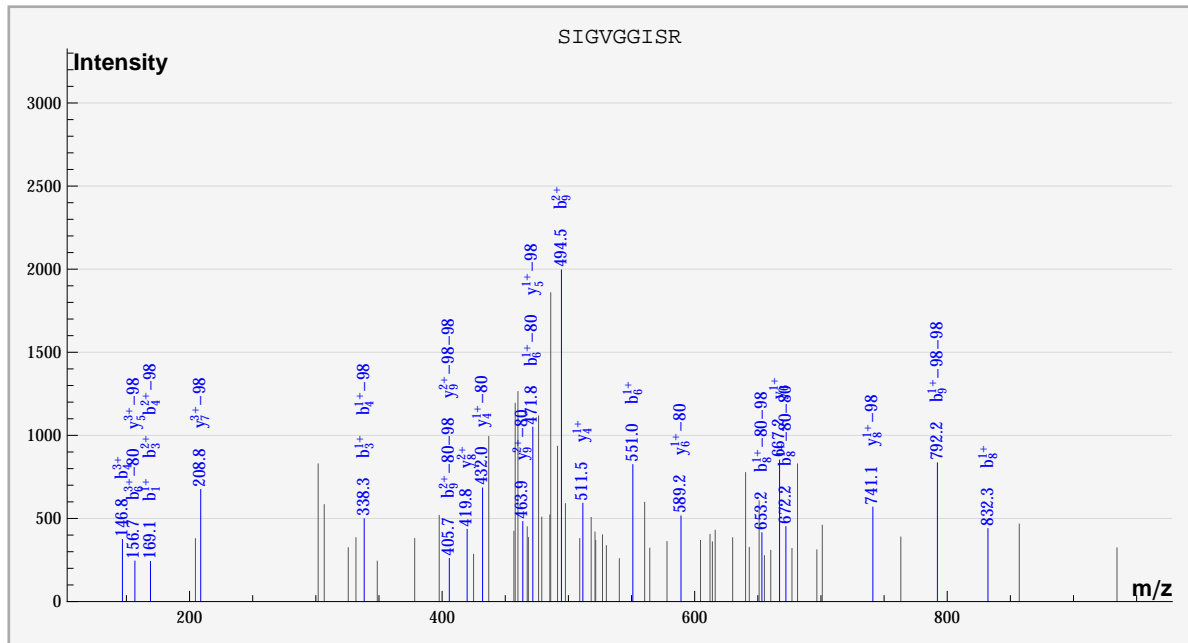

|   | # | b | b* | # | y | y* | P | P* |
|---|---|---|----|---|---|----|---|----|
| S | 1 | ✓ |    |   |   |    |   | ✓  |
| I | 2 |   |    | 8 | ✓ | ✓  |   |    |
| G | 3 | ✓ |    | 7 |   | ✓  |   |    |
| V | 4 | ✓ | ✓  | 6 | ✓ | ✓  |   |    |
| G | 5 |   |    | 5 |   | ✓  |   |    |
| G | 6 | ✓ | ✓  | 4 | ✓ | ✓  |   |    |
| I | 7 |   |    | 3 |   |    |   |    |
| S | 8 | ✓ | ✓  | 2 |   |    |   |    |
| R | 9 | ✓ | ✓  | 1 |   |    |   |    |

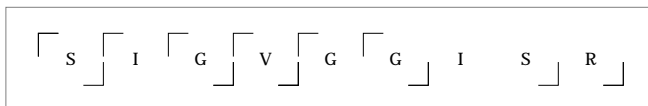

dbValid true TSGIYGSNK PHOS(1) 2. 505. -1.28431 5.08905 100. ? 1746.  
 S\_Acido\_new%gi|68568082|gb|AAY81011.1| TSGIYGSNK%::::::PHOS:::sample\_1%cmpd\_449

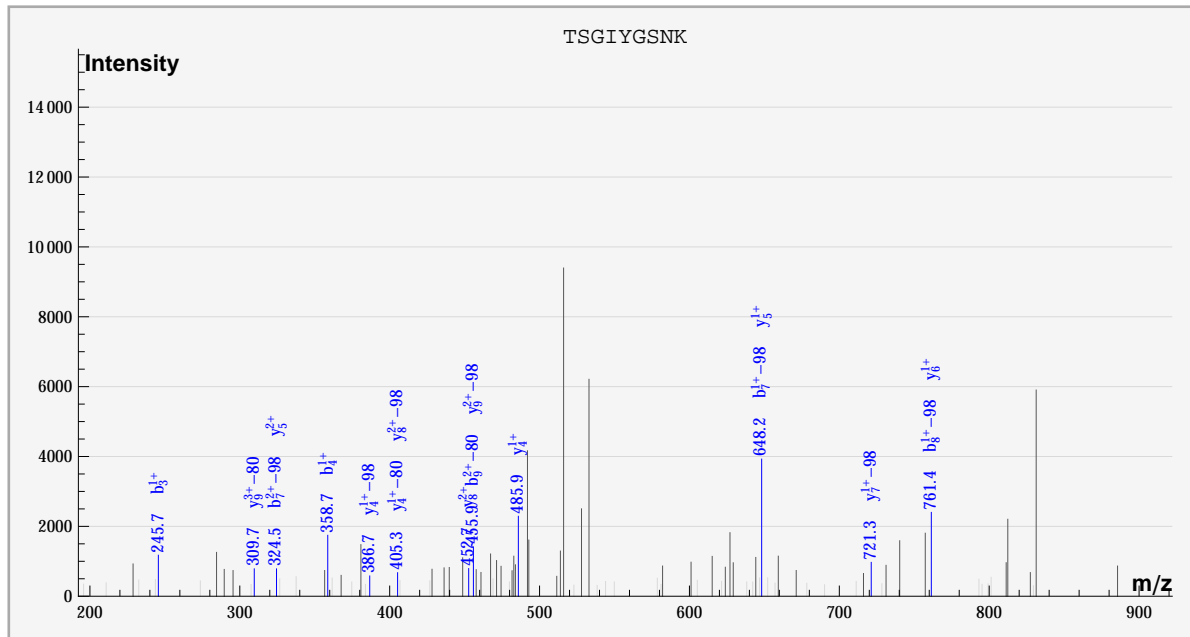

|   | # | b | b* | # | y | y* | P | P* |
|---|---|---|----|---|---|----|---|----|
| T | 1 |   |    |   |   |    |   | ✓  |
| S | 2 |   |    | 8 | ✓ | ✓  |   |    |
| G | 3 | ✓ |    | 7 |   | ✓  |   |    |
| I | 4 | ✓ |    | 6 | ✓ |    |   |    |
| Y | 5 |   |    | 5 | ✓ |    |   |    |
| G | 6 |   |    | 4 | ✓ | ✓  |   |    |
| S | 7 |   | ✓  | 3 |   |    |   |    |
| N | 8 |   | ✓  | 2 |   |    |   |    |
| K | 9 |   | ✓  | 1 |   |    |   |    |

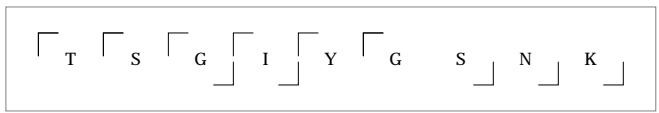

dbValid true TNTGNLVK PHOS(2) 2. 505. -1.29608 5.60826 100. ? 1974.  
 S\_Acido\_new%gi|68568182|gb|AAy81111.1| TNTGNLVK%:PHOS::PHOS:::sample\_1%compd\_644

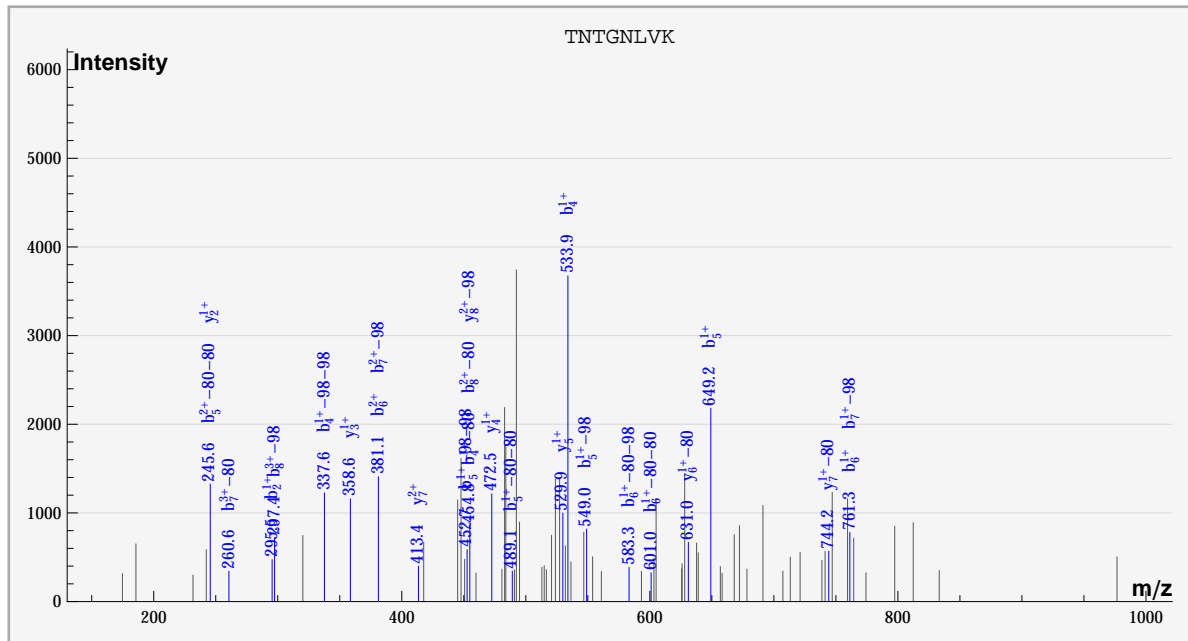

|   | # | b | b* | # | y | y* | P | P* |
|---|---|---|----|---|---|----|---|----|
| T | 1 |   |    |   |   |    |   | ✓  |
| N | 2 | ✓ |    | 7 | ✓ | ✓  |   |    |
| T | 3 |   |    | 6 |   | ✓  |   |    |
| G | 4 | ✓ | ✓  | 5 | ✓ |    |   |    |
| N | 5 | ✓ | ✓  | 4 | ✓ |    |   |    |
| L | 6 | ✓ | ✓  | 3 | ✓ |    |   |    |
| V | 7 |   | ✓  | 2 | ✓ |    |   |    |
| K | 8 |   | ✓  | 1 |   |    |   |    |

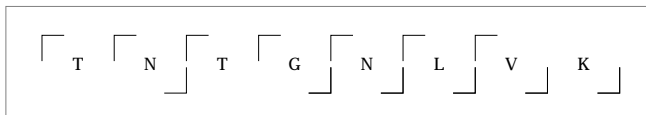

dbValid true IYEFINK PHOS(1) 2. 505. -1.26411 5.04177 100. ? 2028.  
 S\_Acido\_new%gi|68567250|gb|AAY80179.1| IYEFINK%::PHOS:::sample\_0%compd\_644

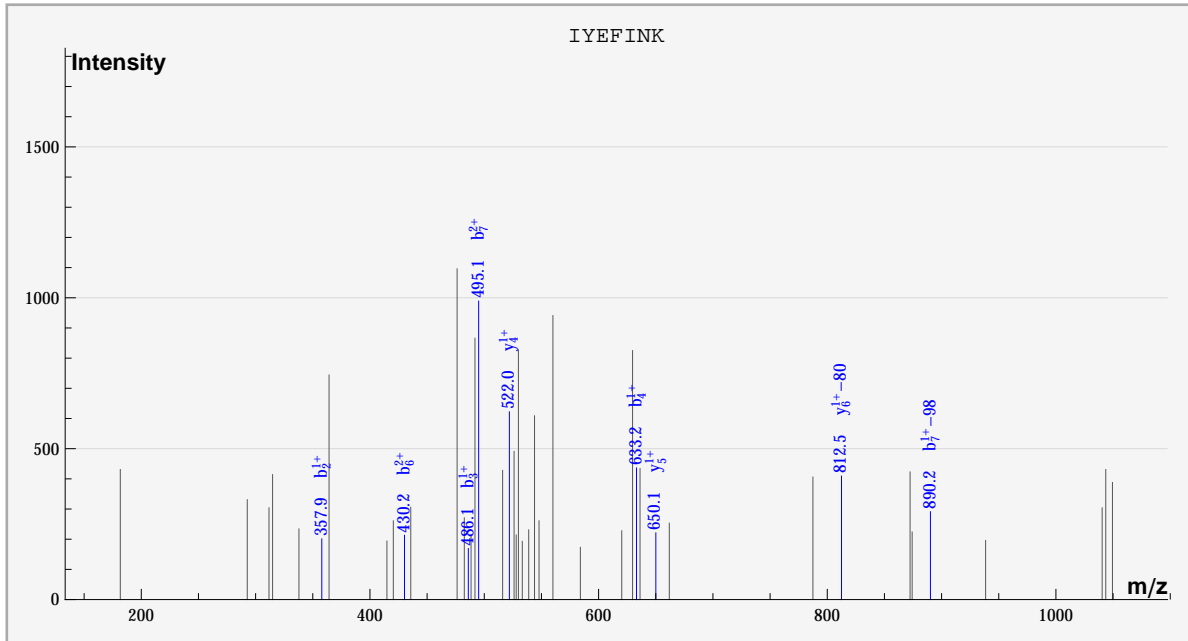

|   | # | b | b* | # | y | y* | P | P* |
|---|---|---|----|---|---|----|---|----|
| I | 1 |   |    |   |   |    |   |    |
| Y | 2 | ✓ |    | 6 |   | ✓  |   |    |
| E | 3 | ✓ |    | 5 | ✓ |    |   |    |
| F | 4 | ✓ |    | 4 | ✓ |    |   |    |
| I | 5 |   |    | 3 |   |    |   |    |
| N | 6 | ✓ |    | 2 |   |    |   |    |
| K | 7 | ✓ | ✓  | 1 |   |    |   |    |

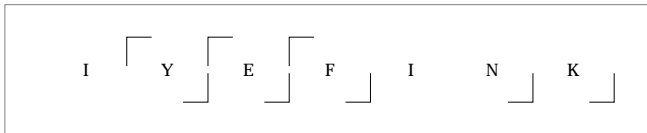

dbValid true TNTGNLVK PHOS(2) 2. 505. -1.29608 5.27243 100. ? 2220.  
 S\_Acido\_new%gii68568182|gb|AAY81111.1| TNTGNLVK%:PHOS::PHOS:::sample\_1%compd\_852

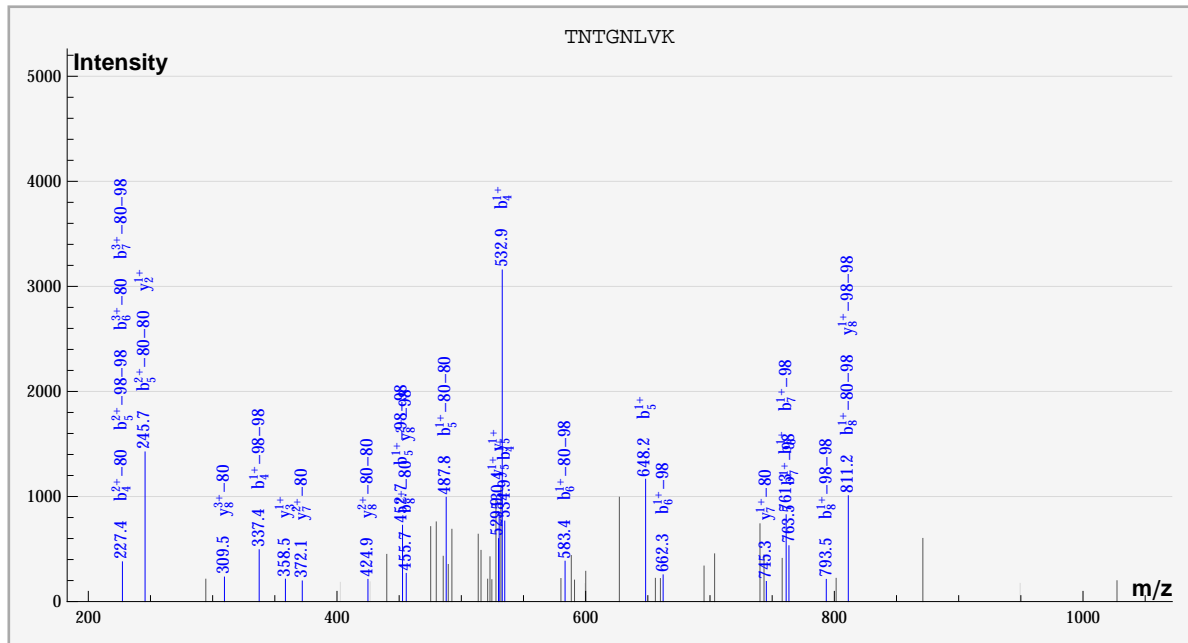

|   | # | b | b* | # | y | y* | P | P* |
|---|---|---|----|---|---|----|---|----|
| T | 1 |   |    |   |   |    |   | ✓  |
| N | 2 |   |    | 7 |   | ✓  |   |    |
| T | 3 |   |    | 6 |   |    |   |    |
| G | 4 | ✓ | ✓  | 5 | ✓ |    |   |    |
| N | 5 | ✓ | ✓  | 4 |   |    |   |    |
| L | 6 | ✓ | ✓  | 3 | ✓ |    |   |    |
| V | 7 |   | ✓  | 2 | ✓ |    |   |    |
| K | 8 |   | ✓  | 1 |   |    |   |    |

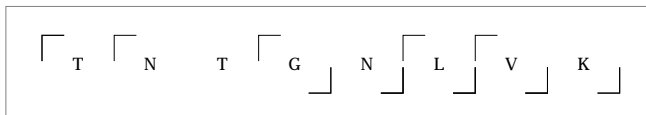

dbValid true SEGENSVIVK PHOS(1) 2. 505. 1.73916 4.92102 100. ? 2382.  
 S\_Acido\_new%gi|68567892|gb|AAy80821.1| SEGENSVIVK%:PHOS::::::::::%sample\_1%cmpd\_984

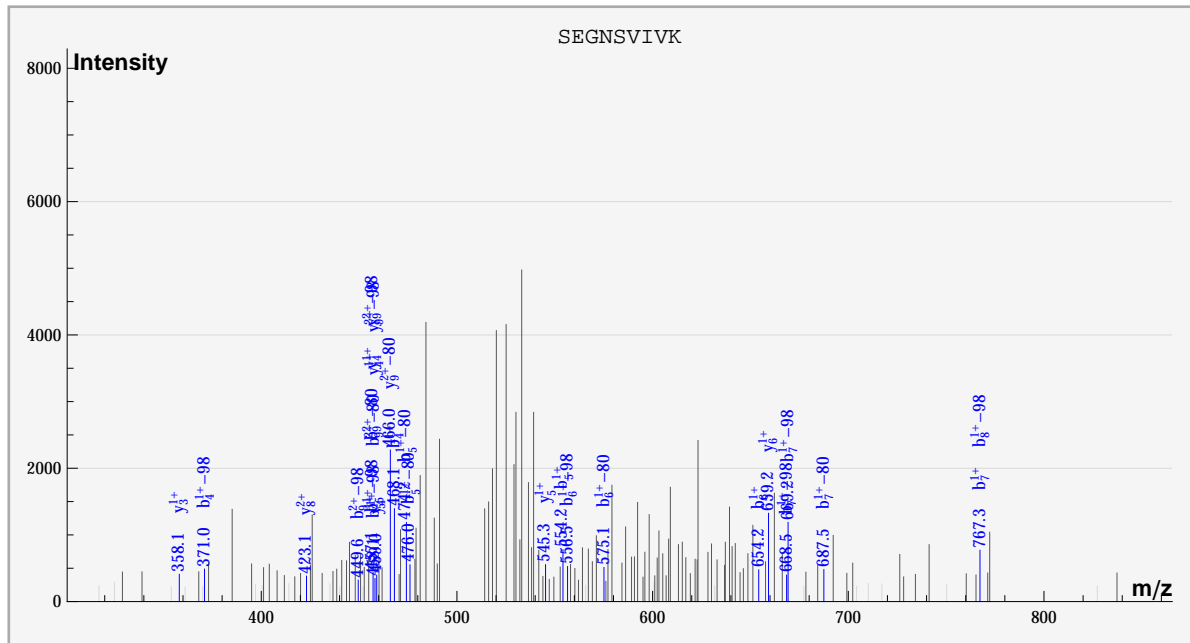

|   | # | b | b* | # | y | y* | P | P* |
|---|---|---|----|---|---|----|---|----|
| S | 1 |   |    |   |   |    |   | ✓  |
| E | 2 |   |    | 8 | ✓ |    |   |    |
| G | 3 |   |    | 7 |   |    |   |    |
| N | 4 | ✓ | ✓  | 6 | ✓ |    |   |    |
| S | 5 | ✓ | ✓  | 5 | ✓ |    |   |    |
| V | 6 | ✓ | ✓  | 4 | ✓ |    |   |    |
| I | 7 | ✓ | ✓  | 3 | ✓ |    |   |    |
| V | 8 |   | ✓  | 2 |   |    |   |    |
| K | 9 |   | ✓  | 1 |   |    |   |    |

SEGENSVIVK



dbValid true SEGENSVIVK PHOS(1) 2. 505. 1.73916 5.27937 100. ? 2394.  
 S\_Acido\_new%gil68567892|gb|AAY80821.1| SEGENSVIVK%:PHOS::::::::::%sample\_1%cmpd\_994

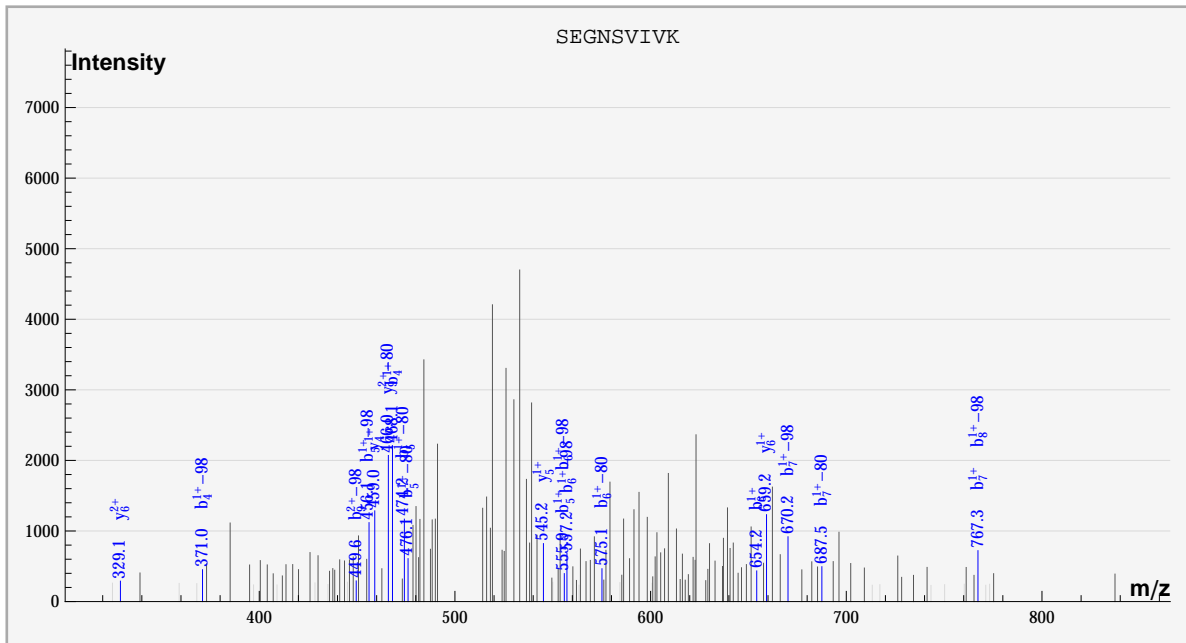

|   | # | b | b* | # | y | y* | P | P* |
|---|---|---|----|---|---|----|---|----|
| S | 1 |   |    |   |   |    |   | ✓  |
| E | 2 |   |    | 8 |   |    |   |    |
| G | 3 |   |    | 7 |   |    |   |    |
| N | 4 | ✓ | ✓  | 6 | ✓ |    |   |    |
| S | 5 | ✓ | ✓  | 5 | ✓ |    |   |    |
| V | 6 | ✓ | ✓  | 4 | ✓ |    |   |    |
| I | 7 | ✓ | ✓  | 3 |   |    |   |    |
| V | 8 |   | ✓  | 2 |   |    |   |    |
| K | 9 |   | ✓  | 1 |   |    |   |    |

「 S E G 「 N 「 S 「 V 「 I 「 V 「 K 」

dbValid true TNTGNLVK PHOS(2) 2. 505. -1.29608 5.12435 100. ? 2526.  
 S\_Acido\_new%gi|68568182|gb|AA81111.1| TNTGNLVK%:PHOS::PHOS:::sample\_1%compd\_1195

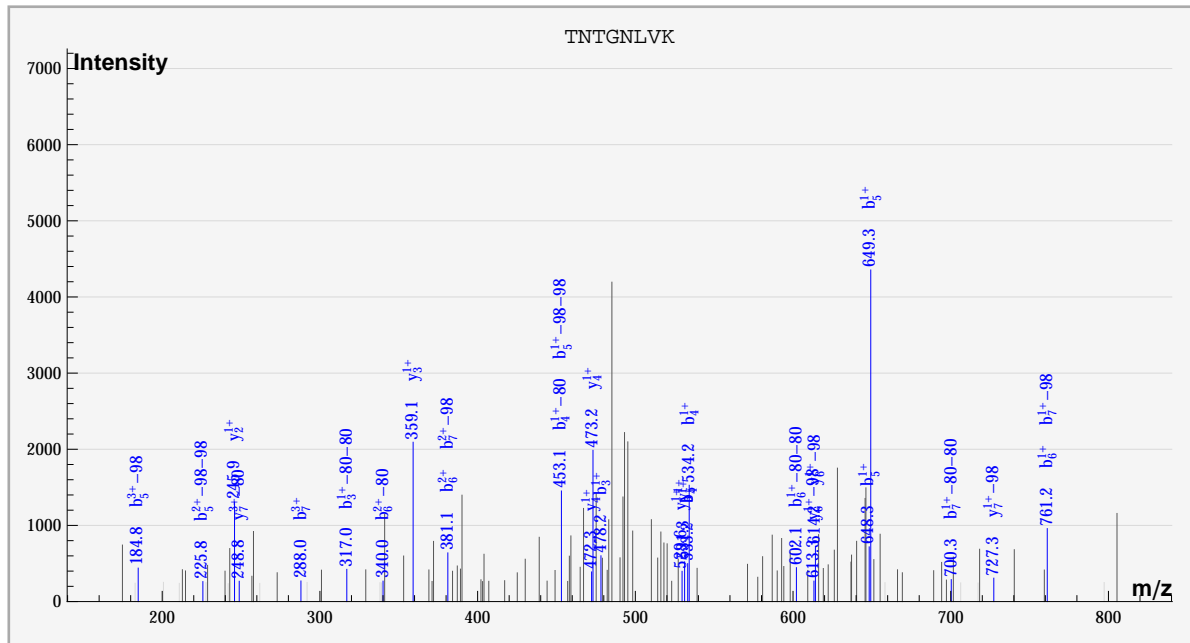

|   | # | b | b* | # | y | y* | P | P* |
|---|---|---|----|---|---|----|---|----|
| T | 1 |   |    |   |   |    |   |    |
| N | 2 |   |    | 7 |   | ✓  |   |    |
| T | 3 | ✓ | ✓  | 6 |   | ✓  |   |    |
| G | 4 | ✓ | ✓  | 5 | ✓ |    |   |    |
| N | 5 | ✓ | ✓  | 4 | ✓ |    |   |    |
| L | 6 | ✓ | ✓  | 3 | ✓ |    |   |    |
| V | 7 | ✓ | ✓  | 2 | ✓ |    |   |    |
| K | 8 |   |    | 1 |   |    |   |    |

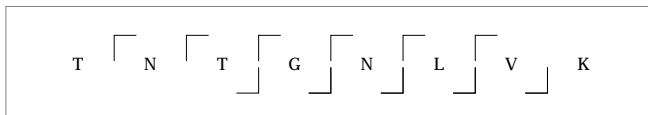

dbValid true LTRTISLK PHOS(1) 2. 505. 1.28354 4.99636 100. ? 3114.

S\_Acido\_new%gi|68567392|gb|AA80321.1| LTRTISLK%:::PHOS:::sample\_1%compd\_1723

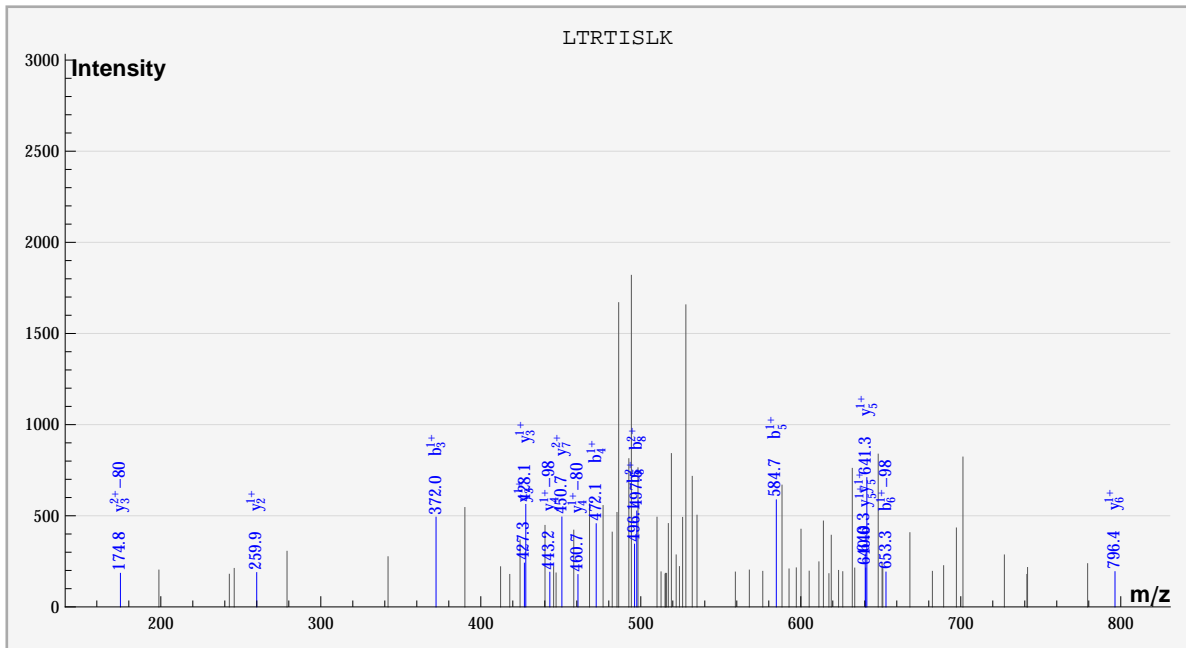

|   | # | b | b* | # | y | y* | P | P* |
|---|---|---|----|---|---|----|---|----|
| L | 1 |   |    |   |   |    |   |    |
| T | 2 |   |    | 7 | ✓ |    |   |    |
| R | 3 | ✓ |    | 6 | ✓ |    |   |    |
| T | 4 | ✓ |    | 5 | ✓ |    |   |    |
| I | 5 | ✓ |    | 4 |   | ✓  |   |    |
| S | 6 |   | ✓  | 3 | ✓ | ✓  |   |    |
| L | 7 |   |    | 2 | ✓ |    |   |    |
| K | 8 | ✓ |    | 1 |   |    |   |    |

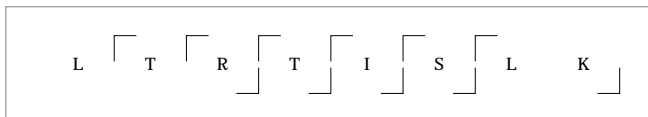

dbValid true DGIGEGKTR PHOS(1) 2. 505. 1.72658 5.01561 100. ? 3414.  
 S\_Acido\_new%gi|68567933|gb|AA80862.1| DGIGEGKTR%:::PHOS::%sample\_1%compd\_1989

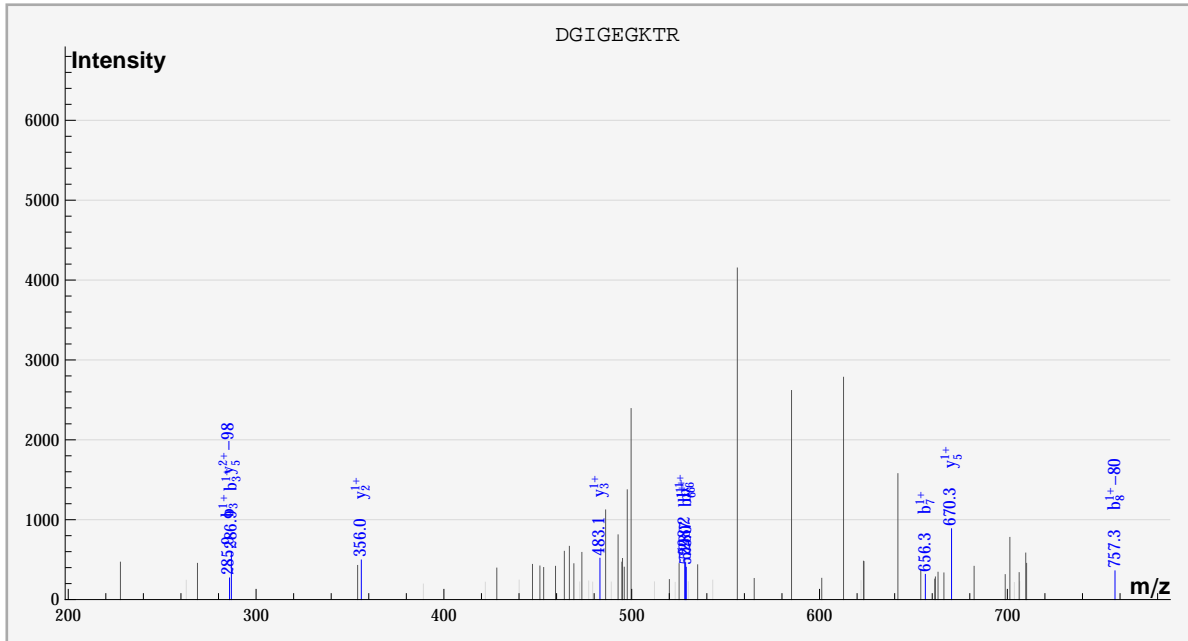

|   | # | b | b* | # | y | y* | P | P* |
|---|---|---|----|---|---|----|---|----|
| D | 1 |   |    |   |   |    |   |    |
| G | 2 |   |    | 8 |   |    |   |    |
| I | 3 | ✓ |    | 7 |   |    |   |    |
| G | 4 |   |    | 6 |   |    |   |    |
| E | 5 |   |    | 5 | ✓ | ✓  |   |    |
| G | 6 | ✓ |    | 4 |   |    |   |    |
| K | 7 | ✓ |    | 3 | ✓ |    |   |    |
| T | 8 |   | ✓  | 2 | ✓ |    |   |    |
| R | 9 |   |    | 1 |   |    |   |    |

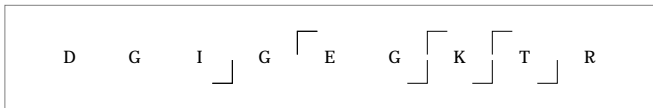



dbValid true RSVLVKTK PHOS(1) 2. 505. 0.791527 4.98498 100. ? 3534.  
 S\_Acido\_new%gi|68567850|gb|AAY80779.1| RSVLVKTK%::::::PHOS::%sample\_0%cmpd\_1896

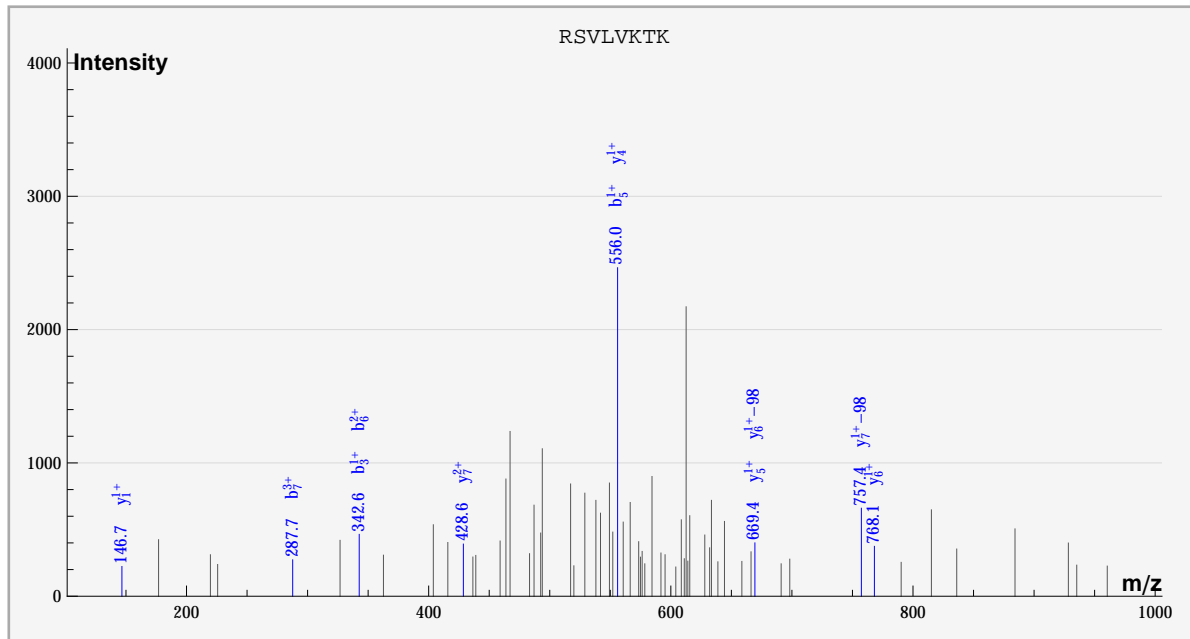

|   | # | b | b* | # | y | y* | P | P* |
|---|---|---|----|---|---|----|---|----|
| R | 1 |   |    |   |   |    |   |    |
| S | 2 |   |    | 7 | ✓ | ✓  |   |    |
| V | 3 | ✓ |    | 6 | ✓ | ✓  |   |    |
| L | 4 |   |    | 5 | ✓ |    |   |    |
| V | 5 | ✓ |    | 4 | ✓ |    |   |    |
| K | 6 | ✓ |    | 3 |   |    |   |    |
| T | 7 | ✓ |    | 2 |   |    |   |    |
| K | 8 |   |    | 1 | ✓ |    |   |    |

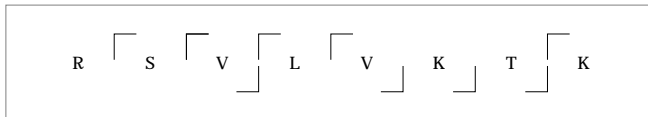

dbValid true SALLHGLSK PHOS(1) 2. 505. -1.73994 5.44449 100. ? 3582.  
 S\_Acido\_new%gi|68567941|gb|AAy80870.1| SALLHGLSK%:PHOS:.....:sample\_0%cmpd\_1936

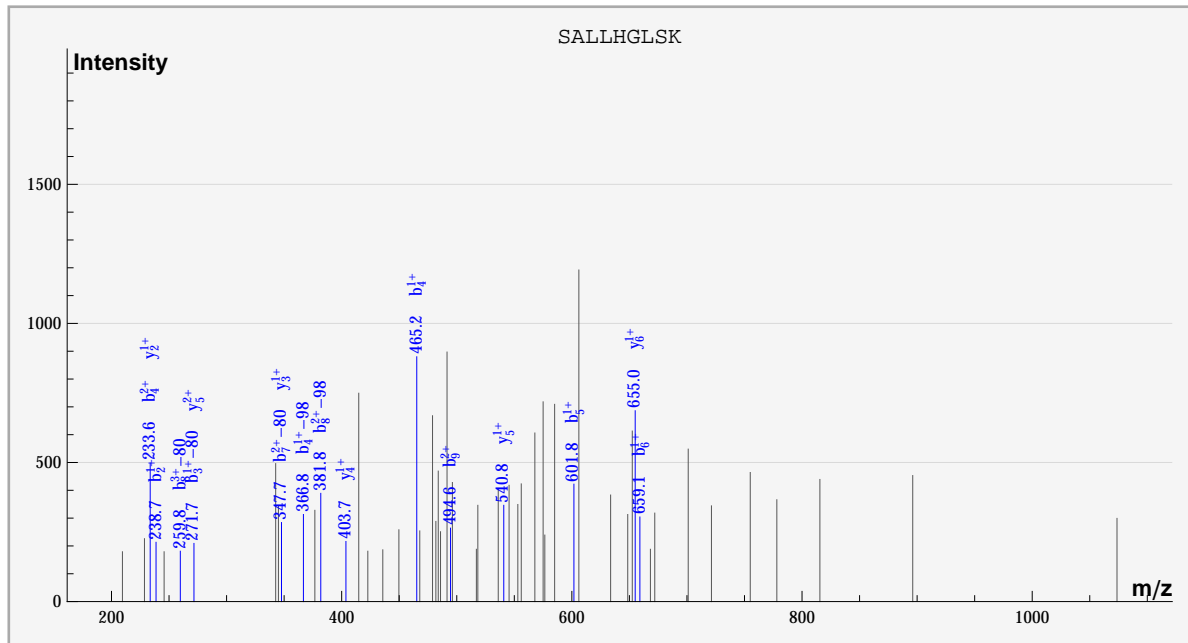

|   | # | b | b* | # | y | y* | P | P* |
|---|---|---|----|---|---|----|---|----|
| S | 1 |   |    |   |   |    |   |    |
| A | 2 | ✓ |    | 8 |   |    |   |    |
| L | 3 |   | ✓  | 7 |   |    |   |    |
| L | 4 | ✓ | ✓  | 6 | ✓ |    |   |    |
| H | 5 | ✓ |    | 5 | ✓ |    |   |    |
| G | 6 | ✓ |    | 4 | ✓ |    |   |    |
| L | 7 |   | ✓  | 3 | ✓ |    |   |    |
| S | 8 |   | ✓  | 2 | ✓ |    |   |    |
| K | 9 | ✓ |    | 1 |   |    |   |    |

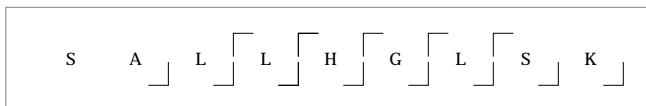

dbValid true YYGLTR PHOS(3) 2. 505. 1.6525 5.40438 100. ? 3642.  
 S\_Acido\_new%gi|68568208|gb|AAY81137.1| YYGLTR%:PHOS:PHOS::PHOS::%sample\_0%compd\_1986

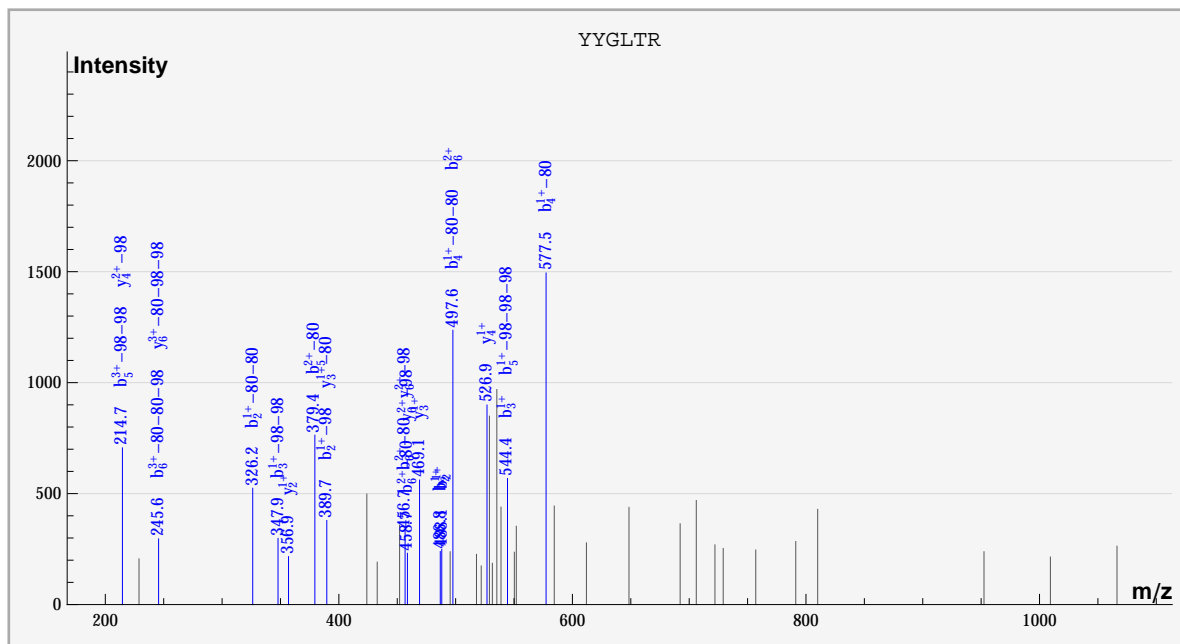

|   | # | b | b* | # | y | y* | P | P* |
|---|---|---|----|---|---|----|---|----|
| Y | 1 |   |    |   |   |    |   | ✓  |
| Y | 2 | ✓ | ✓  | 5 |   |    |   |    |
| G | 3 | ✓ | ✓  | 4 | ✓ | ✓  |   |    |
| L | 4 |   | ✓  | 3 | ✓ | ✓  |   |    |
| T | 5 |   | ✓  | 2 | ✓ |    |   |    |
| R | 6 | ✓ | ✓  | 1 |   |    |   |    |

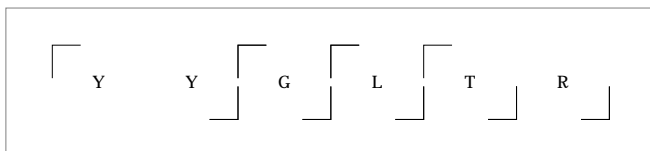



dbValid true GELHGYEK PHOS(1) 2. 505. 1.7104 5.27528 100. ? 3678.  
 S\_Acido\_new%gi|68567410|gb|AAY80339.1| GELHGYEK%:::PHOS:::sample\_0%compd\_2016

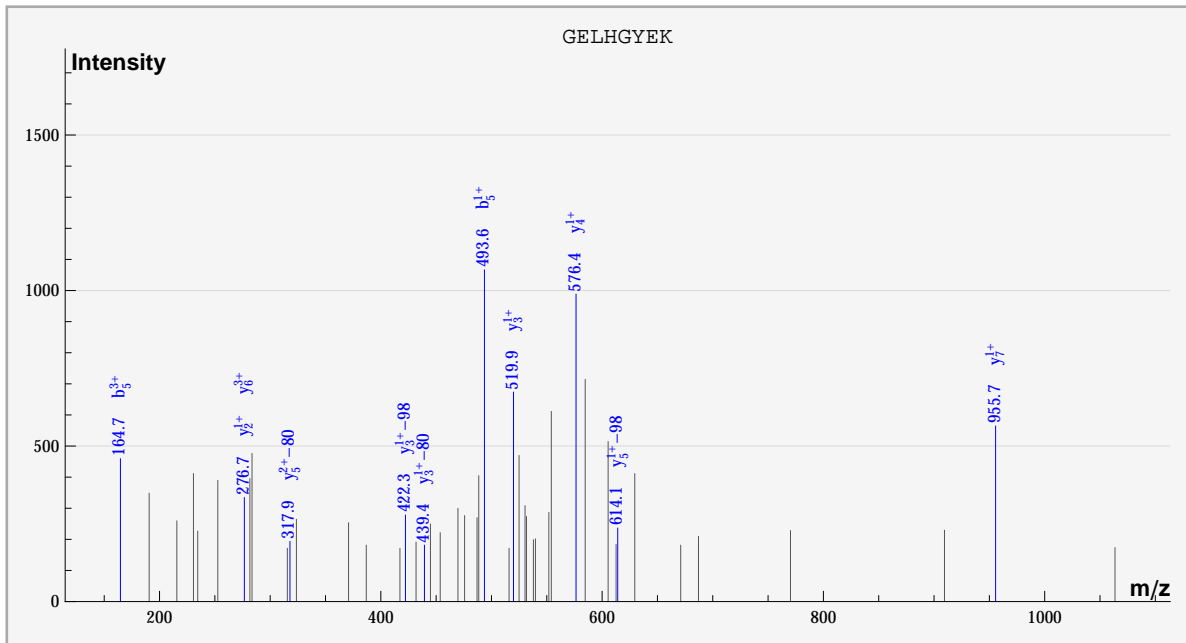

|   | # | b | b* | # | y | y* | P | P* |
|---|---|---|----|---|---|----|---|----|
| G | 1 |   |    |   |   |    |   |    |
| E | 2 |   |    | 7 | ✓ |    |   |    |
| L | 3 |   |    | 6 | ✓ |    |   |    |
| H | 4 |   |    | 5 |   | ✓  |   |    |
| G | 5 | ✓ |    | 4 | ✓ |    |   |    |
| Y | 6 |   |    | 3 | ✓ | ✓  |   |    |
| E | 7 |   |    | 2 | ✓ |    |   |    |
| K | 8 |   |    | 1 |   |    |   |    |

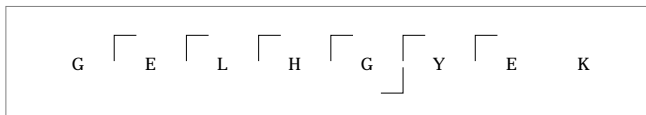

dbValid true ETGKAVSR PHOS(2) 2. 505. -0.798458 5.23777 100. ? 3690.  
 S\_Acido\_new%gi|68568092|gb|AAy81021.1| ETGKAVSR%::PHOS:::PHOS::%sample\_0%cmpd\_2026

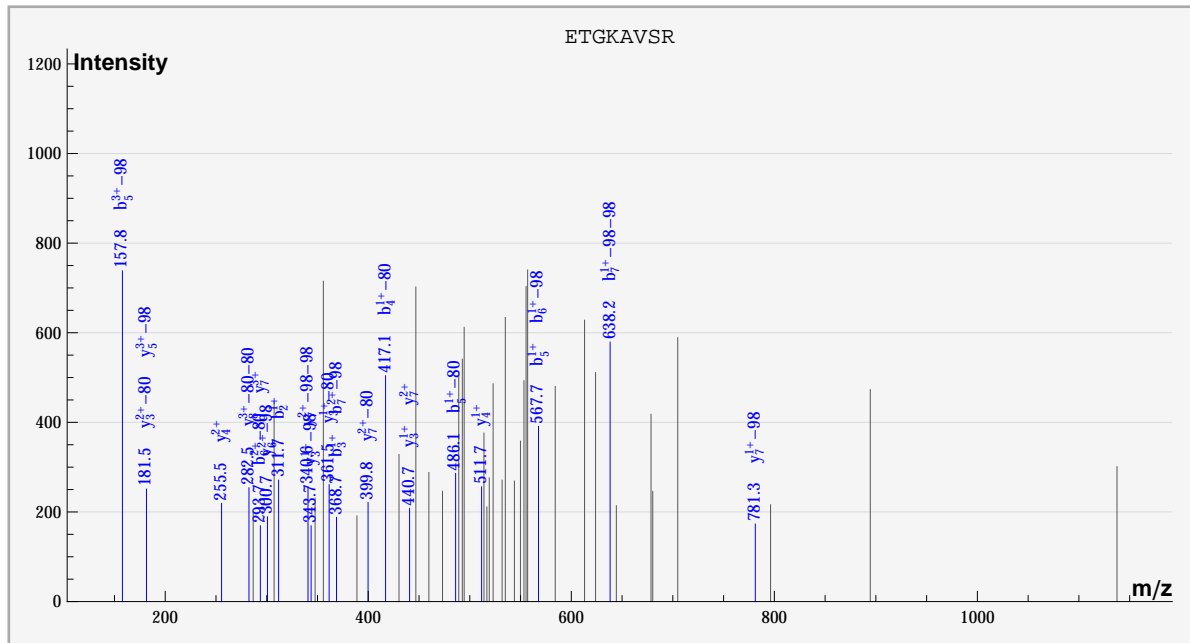

|   | # | b | b* | # | y | y* | P | P* |
|---|---|---|----|---|---|----|---|----|
| E | 1 |   |    |   |   |    |   | ✓  |
| T | 2 | ✓ |    | 7 | ✓ | ✓  |   |    |
| G | 3 | ✓ |    | 6 |   | ✓  |   |    |
| K | 4 |   | ✓  | 5 |   | ✓  |   |    |
| A | 5 | ✓ | ✓  | 4 | ✓ |    |   |    |
| V | 6 |   | ✓  | 3 | ✓ | ✓  |   |    |
| S | 7 |   | ✓  | 2 |   |    |   |    |
| R | 8 |   |    | 1 |   |    |   |    |

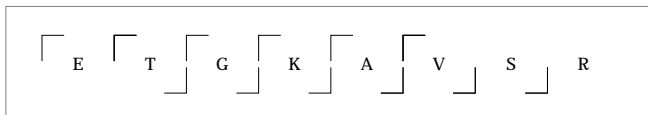

dbValid true YYDETR PHOS(2) 2. 505. -1.34864 5.17588 100. ? 4482.  
 S\_Acido\_new%gi|68566560|gb|AAY79489.1| YYDETR%:PHOS:PHOS::::%sample\_0%cmpd\_2695

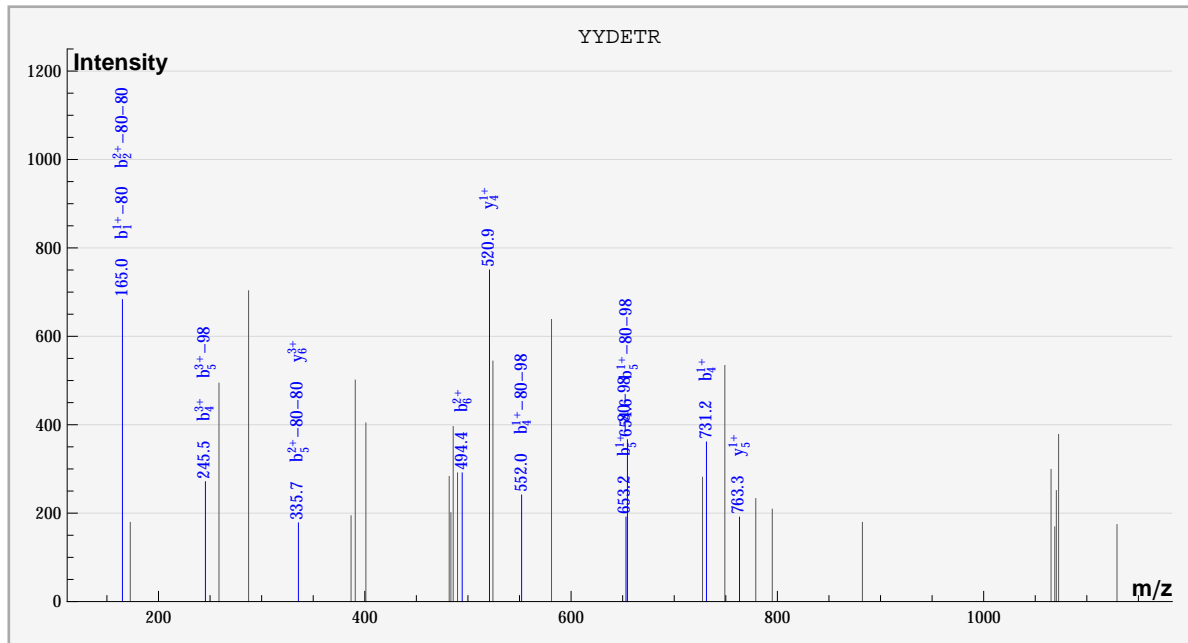

|   | # | b | b* | # | y | y* | P | P* |
|---|---|---|----|---|---|----|---|----|
| Y | 1 |   | ✓  |   |   |    |   | ✓  |
| Y | 2 |   | ✓  | 5 | ✓ |    |   |    |
| D | 3 |   |    | 4 | ✓ |    |   |    |
| E | 4 | ✓ | ✓  | 3 |   |    |   |    |
| T | 5 |   | ✓  | 2 |   |    |   |    |
| R | 6 | ✓ |    | 1 |   |    |   |    |

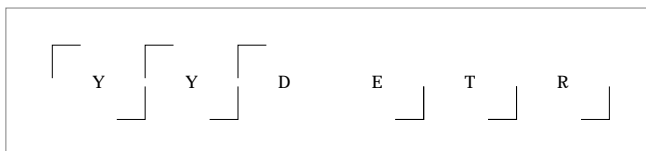

dbValid true KCTGIISR Cys\_CAM(1),PHOS(1) 2. 506. 1.74372 5.14404 100. ? 2004.  
 S\_Acido\_new%gi68567951|gb|AAy80880.1| KCTGIISR::Cys\_CAM:PHOS:::sample\_0%compd\_625

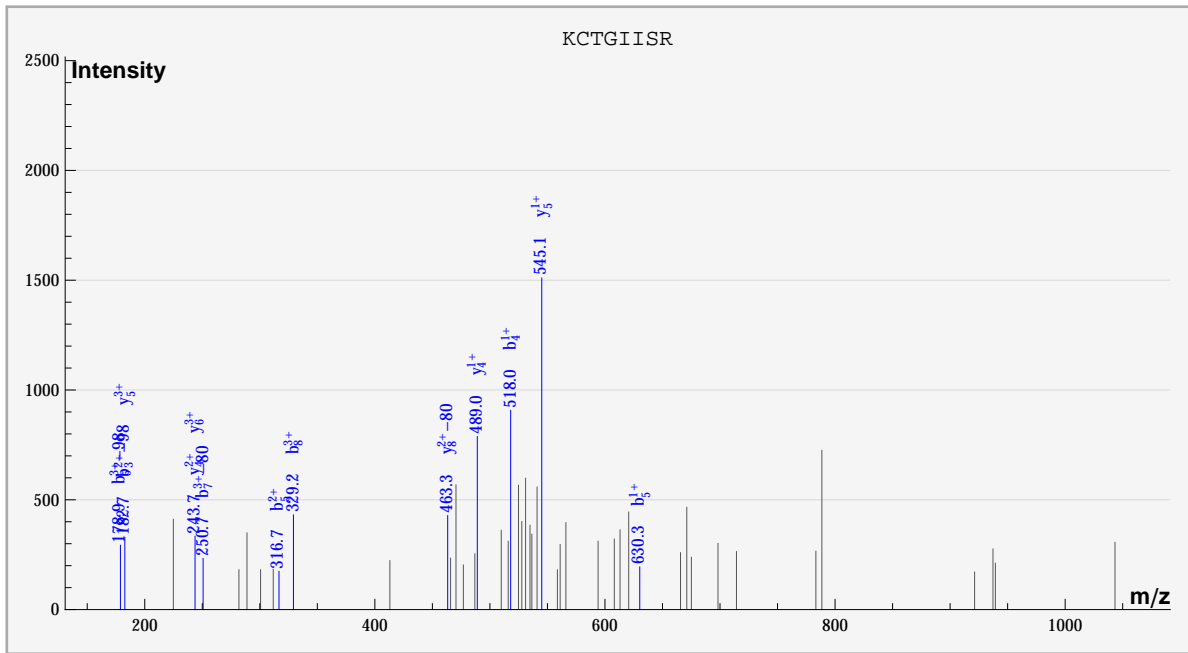

|   | # | b | b* | # | y | y* | P | P* |
|---|---|---|----|---|---|----|---|----|
| K | 1 |   |    |   |   |    |   | ✓  |
| C | 2 |   |    | 7 |   |    |   |    |
| T | 3 |   | ✓  | 6 |   | ✓  |   |    |
| G | 4 | ✓ |    | 5 |   | ✓  |   |    |
| I | 5 | ✓ | ✓  | 4 |   | ✓  |   |    |
| I | 6 |   |    | 3 |   |    |   |    |
| S | 7 |   | ✓  | 2 |   |    |   |    |
| R | 8 | ✓ |    | 1 |   |    |   |    |

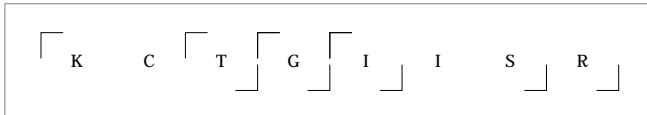

dbValid true LEYGTK PHOS(2) 2. 506. -1.81464 5.13265 100. ? 2094.

S\_Acido\_new%gi|68568214|gb|AAy81143.1| LEYGTK%:::PHOS:::PHOS:::sample\_1%compd\_806

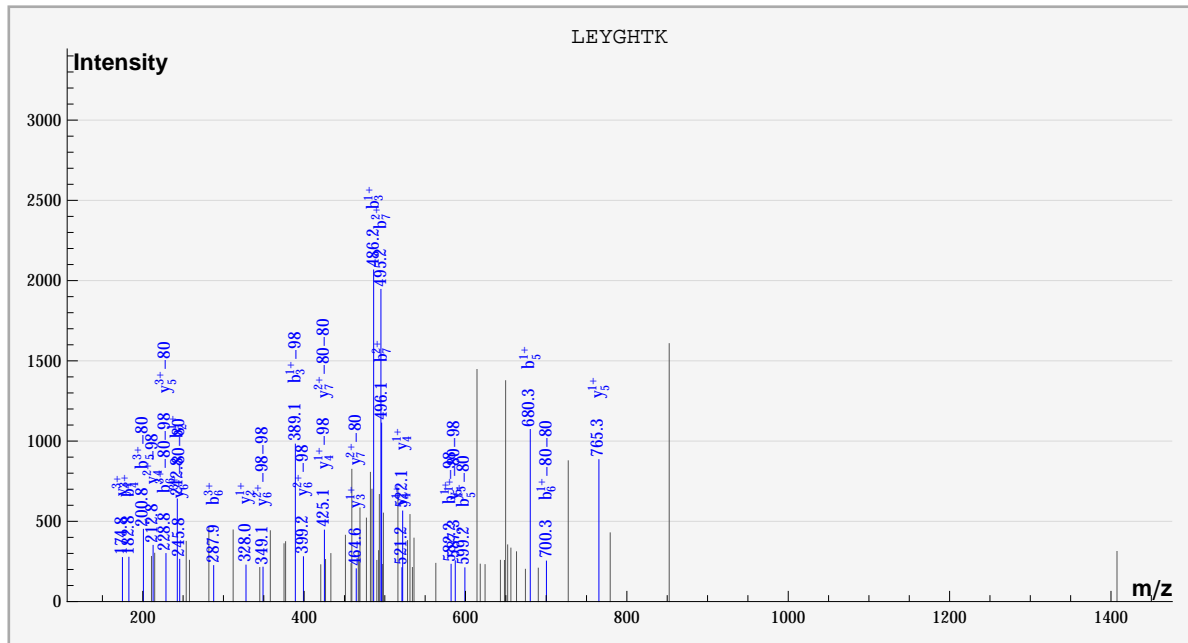

|   | # | b | b* | # | y | y* | P | P* |
|---|---|---|----|---|---|----|---|----|
| L | 1 |   |    |   |   |    |   | ✓  |
| E | 2 | ✓ |    | 6 |   | ✓  |   |    |
| Y | 3 | ✓ | ✓  | 5 | ✓ | ✓  |   |    |
| G | 4 | ✓ |    | 4 | ✓ | ✓  |   |    |
| H | 5 | ✓ | ✓  | 3 | ✓ |    |   |    |
| T | 6 | ✓ | ✓  | 2 | ✓ |    |   |    |
| K | 7 | ✓ |    | 1 |   |    |   |    |

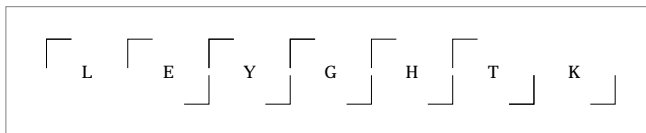

dbValid true SLISGSRK PHOS(2) 2. 506. -1.78026 5.92838 100. ? 2136.  
 S\_Acido\_new%gi|68567524|gb|AAY80453.1| SLISGSRK%:PHOS:::PHOS:::sample\_0%compd\_735

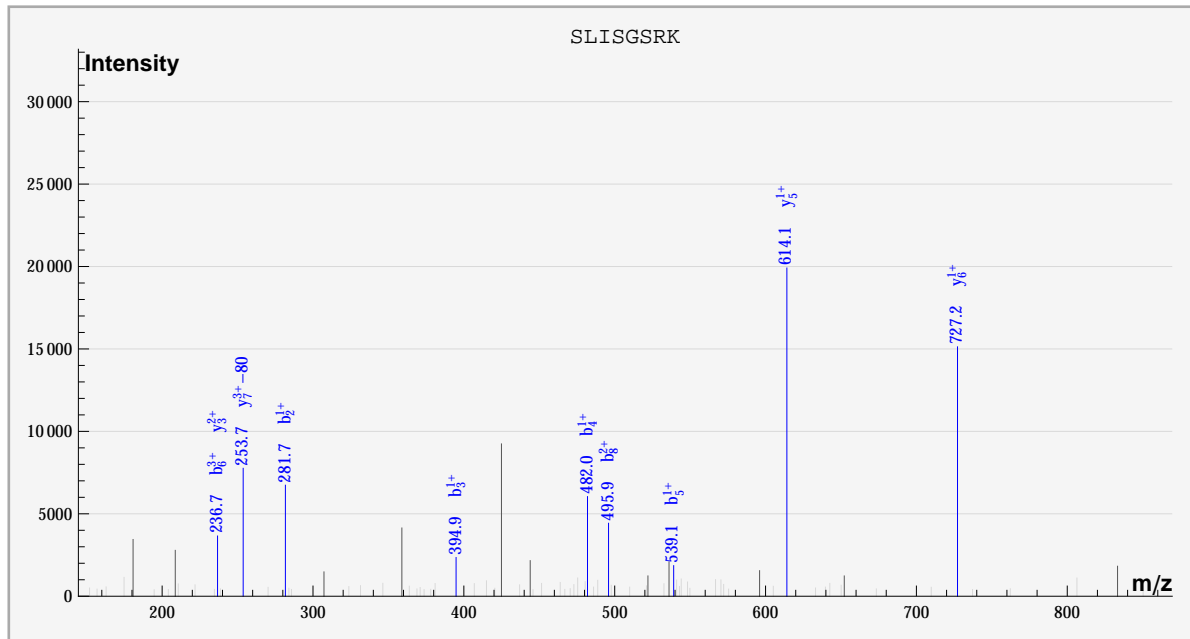

|   | # | b | b* | # | y | y* | P | P* |
|---|---|---|----|---|---|----|---|----|
| S | 1 |   |    |   |   |    |   |    |
| L | 2 | ✓ |    | 7 |   | ✓  |   |    |
| I | 3 | ✓ |    | 6 | ✓ |    |   |    |
| S | 4 | ✓ |    | 5 | ✓ |    |   |    |
| G | 5 | ✓ |    | 4 |   |    |   |    |
| S | 6 | ✓ |    | 3 | ✓ |    |   |    |
| R | 7 |   |    | 2 |   |    |   |    |
| K | 8 | ✓ |    | 1 |   |    |   |    |

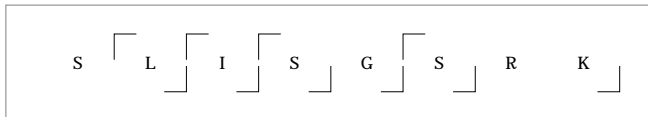

dbValid true NSISTLSK PHOS(2) 2. 506. -0.796243 5.42101 100. ? 2328.  
 S\_Acido\_new%gi|68568458|gb|AAY81387.1| NSISTLSK%::PHOS::PHOS:::%sample\_0%compd\_896

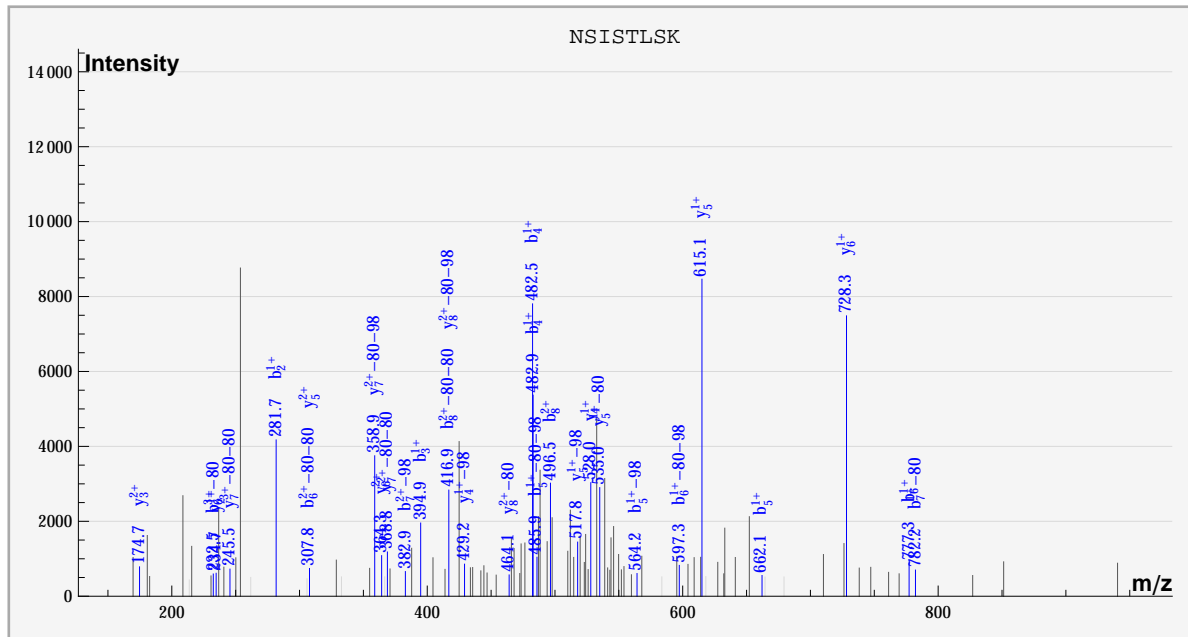

|   | # | b | b* | # | y | y* | P | P* |
|---|---|---|----|---|---|----|---|----|
| N | 1 |   |    |   |   |    |   | ✓  |
| S | 2 | ✓ |    | 7 |   | ✓  |   |    |
| I | 3 | ✓ |    | 6 | ✓ |    |   |    |
| S | 4 | ✓ |    | 5 | ✓ | ✓  |   |    |
| T | 5 | ✓ | ✓  | 4 | ✓ | ✓  |   |    |
| L | 6 | ✓ | ✓  | 3 | ✓ |    |   |    |
| S | 7 |   | ✓  | 2 | ✓ |    |   |    |
| K | 8 | ✓ | ✓  | 1 |   |    |   |    |

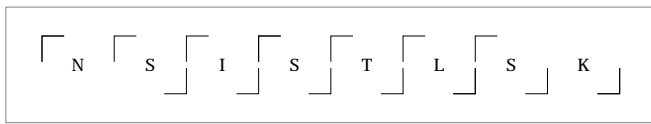

dbValid true NSISTLSK PHOS(2) 2. 506. -0.796243 4.99171 100. ? 2340.  
 S\_Acido\_new%gi|68568458|gb|AA81387.1| NSISTLSK%::PHOS%::PHOS%::%sample\_0%compd\_906

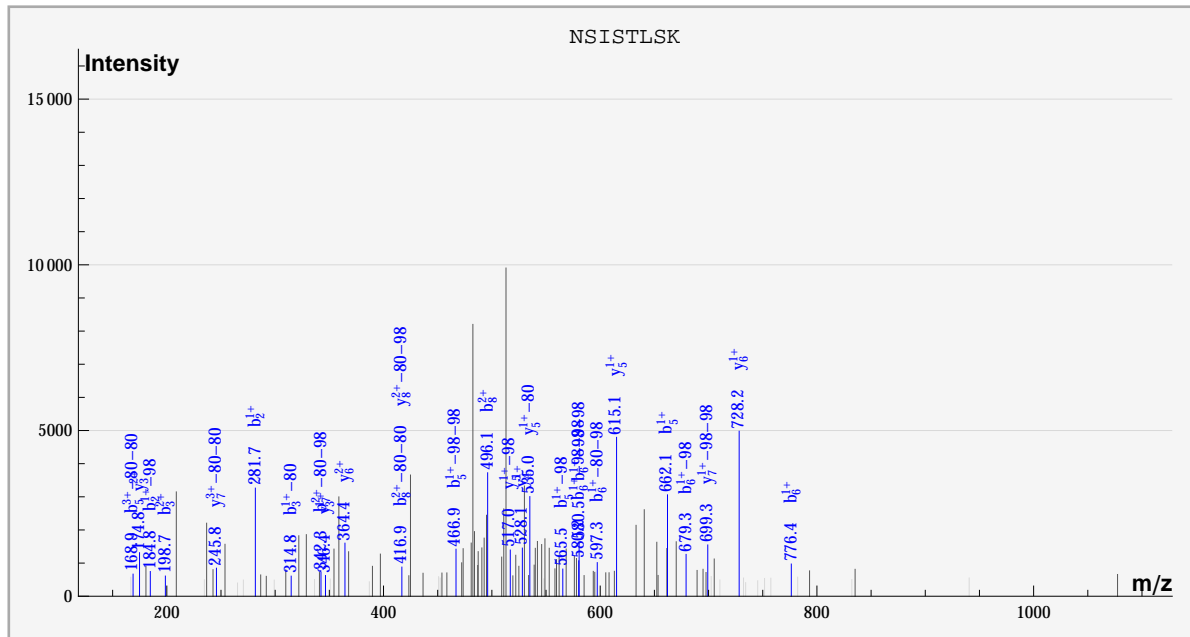

|   | # | b | b* | # | y | y* | P | P* |
|---|---|---|----|---|---|----|---|----|
| N | 1 |   |    |   |   |    |   | ✓  |
| S | 2 | ✓ | ✓  | 7 |   | ✓  |   |    |
| I | 3 | ✓ | ✓  | 6 | ✓ |    |   |    |
| S | 4 |   |    | 5 | ✓ | ✓  |   |    |
| T | 5 | ✓ | ✓  | 4 | ✓ |    |   |    |
| L | 6 | ✓ | ✓  | 3 | ✓ |    |   |    |
| S | 7 |   |    | 2 |   |    |   |    |
| K | 8 | ✓ | ✓  | 1 |   |    |   |    |

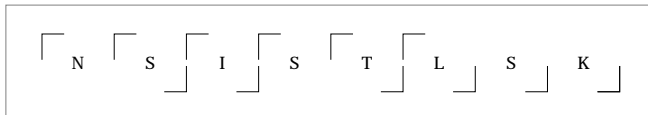



dbValid true ILYMDEK Oxidation\_M(1),PHOS(1) 2. 506. -1.78862 4.92548 100. ? 2388.  
 S\_Acido\_new%gil68567772|gb|AAY80701.1| ILYMDEK%:::PHOS:Oxidation\_M::::%sample\_1%compd\_995

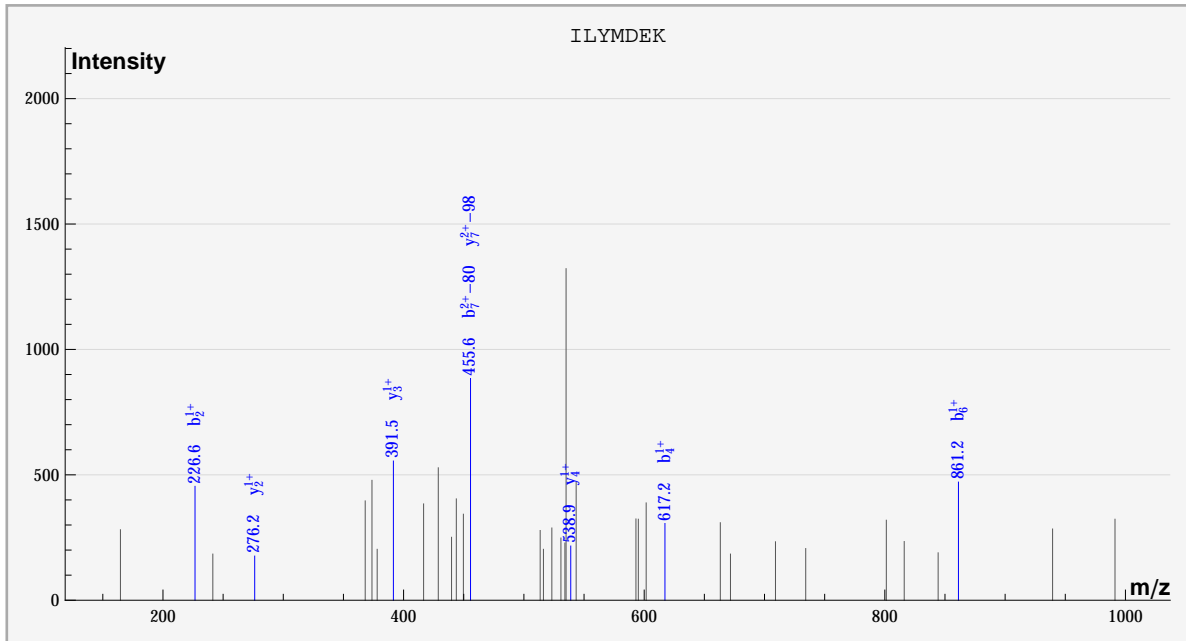

|   | # | b | b* | # | y | y* | P | P* |
|---|---|---|----|---|---|----|---|----|
| I | 1 |   |    |   |   |    |   | ✓  |
| L | 2 | ✓ |    | 6 |   |    |   |    |
| Y | 3 |   |    | 5 |   |    |   |    |
| M | 4 | ✓ |    | 4 | ✓ |    |   |    |
| D | 5 |   |    | 3 | ✓ |    |   |    |
| E | 6 | ✓ |    | 2 | ✓ |    |   |    |
| K | 7 |   | ✓  | 1 |   |    |   |    |

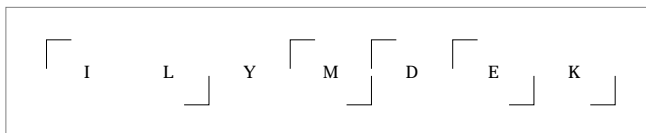

dbValid true YYLDNIK PHOS(1) 2. 506. -1.27448 5.28017 100. ? 3318.

S\_Acido\_new%gi|68567889|gb|AAY80818.1| YYLDNIK%:PHOS:.....%sample\_1%cmpd\_1905

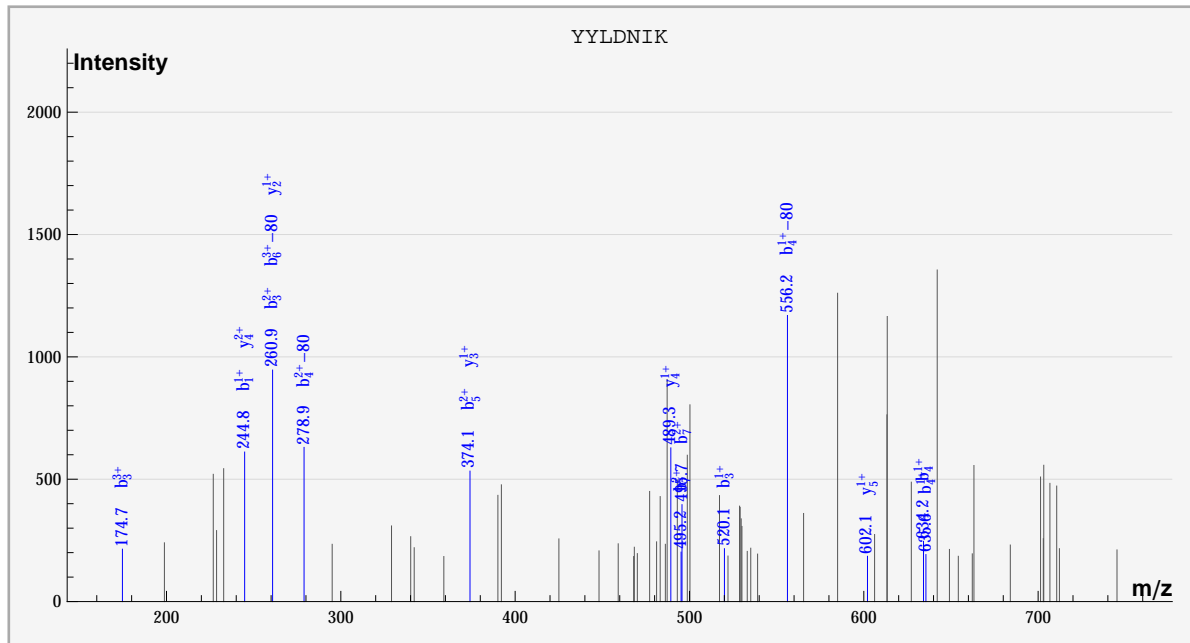

|   | # | b | b* | # | y | y* | P | P* |
|---|---|---|----|---|---|----|---|----|
| Y | 1 | ✓ |    |   |   |    |   |    |
| Y | 2 |   |    | 6 |   |    |   |    |
| L | 3 | ✓ |    | 5 | ✓ |    |   |    |
| D | 4 | ✓ | ✓  | 4 | ✓ |    |   |    |
| N | 5 | ✓ |    | 3 | ✓ |    |   |    |
| I | 6 |   | ✓  | 2 | ✓ |    |   |    |
| K | 7 | ✓ |    | 1 |   |    |   |    |

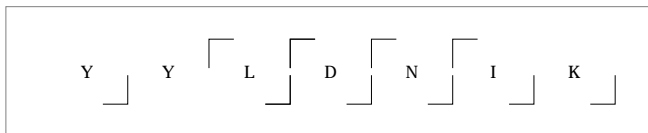

dbValid true YYLDNIK PHOS(1) 2. 506. -1.27448 5.3221 100. ? 3330.

S\_Acido\_new%gi|68567889|gb|AAY80818.1| YYLDNIK%:PHOS:::sample\_1%cmpd\_1915

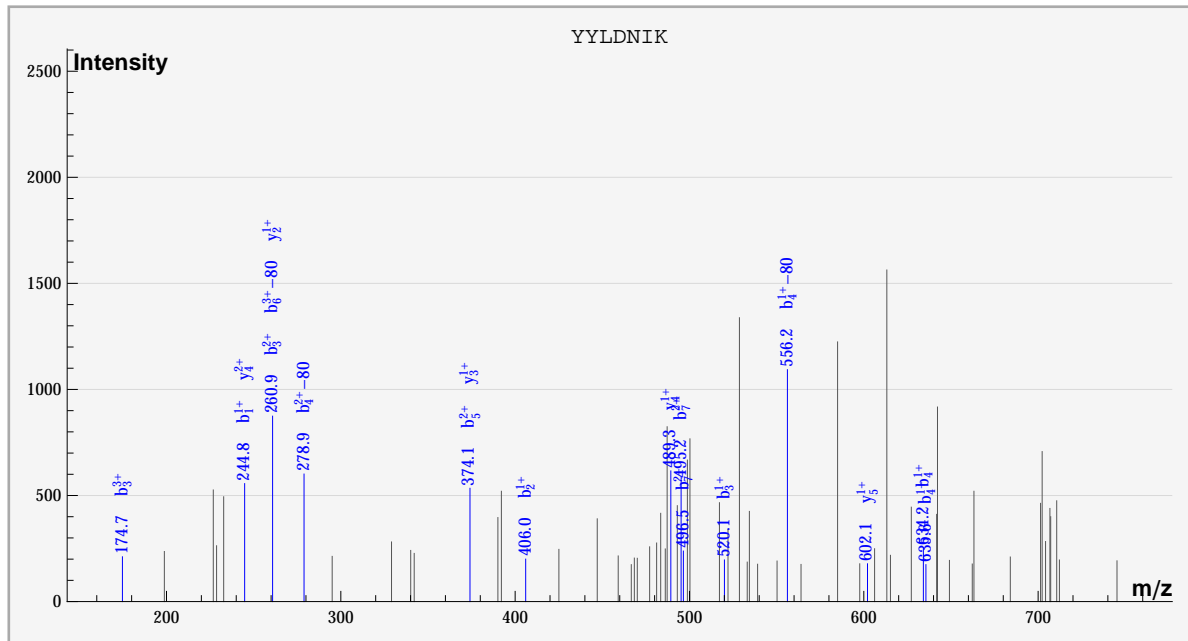

|   | # | b | b* | # | y | y* | P | P* |
|---|---|---|----|---|---|----|---|----|
| Y | 1 | ✓ |    |   |   |    |   |    |
| Y | 2 | ✓ |    | 6 |   |    |   |    |
| L | 3 | ✓ |    | 5 | ✓ |    |   |    |
| D | 4 | ✓ | ✓  | 4 | ✓ |    |   |    |
| N | 5 | ✓ |    | 3 | ✓ |    |   |    |
| I | 6 |   | ✓  | 2 | ✓ |    |   |    |
| K | 7 | ✓ |    | 1 |   |    |   |    |

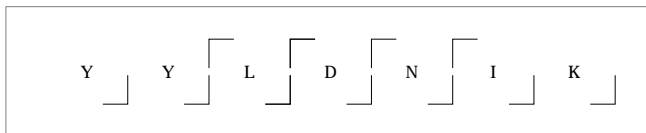

dbValid true SLISGSRK PHOS(2) 2. 506. -1.78026 5.06494 100. ? 3354.  
 S\_Acido\_new%gi|68567524|gb|AAy80453.1| SLISGSRK%:PHOS:::PHOS:::sample\_0%compd\_1746

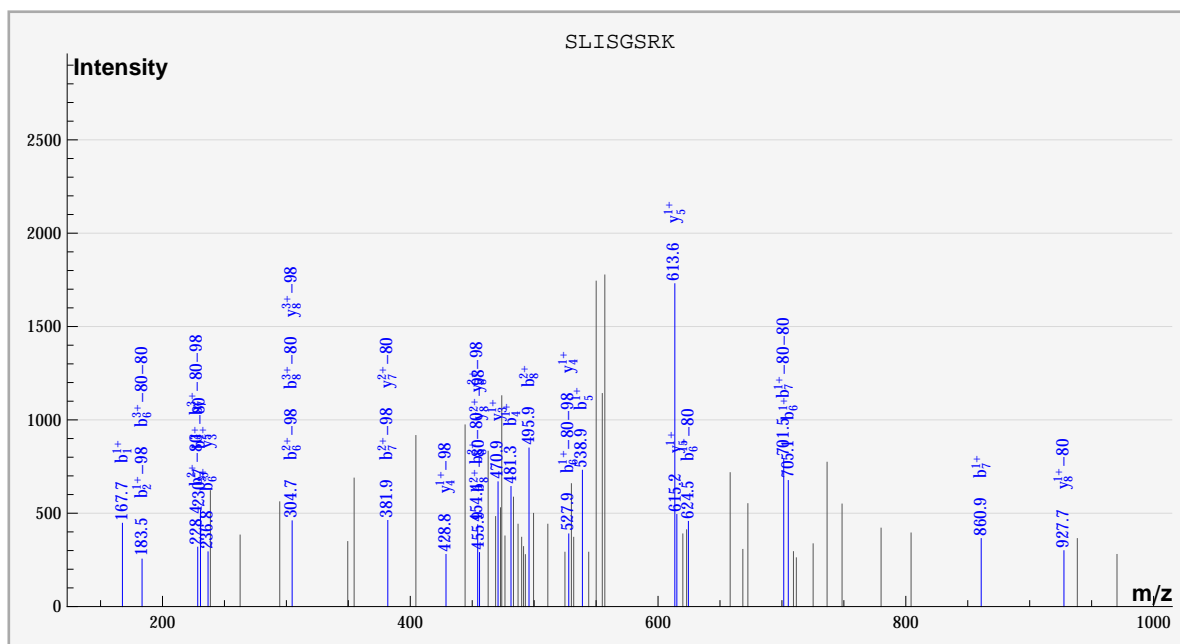

|   | # | b | b* | # | y | y* | P | P* |
|---|---|---|----|---|---|----|---|----|
| S | 1 | ✓ |    |   |   |    |   | ✓  |
| L | 2 |   | ✓  | 7 |   | ✓  |   |    |
| I | 3 |   |    | 6 |   |    |   |    |
| S | 4 | ✓ |    | 5 | ✓ |    |   |    |
| G | 5 | ✓ | ✓  | 4 | ✓ | ✓  |   |    |
| S | 6 | ✓ | ✓  | 3 | ✓ |    |   |    |
| R | 7 | ✓ | ✓  | 2 |   |    |   |    |
| K | 8 | ✓ | ✓  | 1 |   |    |   |    |

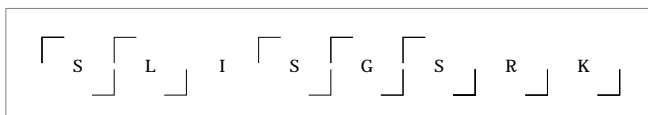

dbValid true FNAYTWK PHOS(1) 2. 506. -0.787418 5.73035 100. ? 4362.  
 S\_Acido\_new%gi|68568207|gb|AAY81136.1| FNAYTWK%::::PHOS:::%sample\_0%compd\_2592

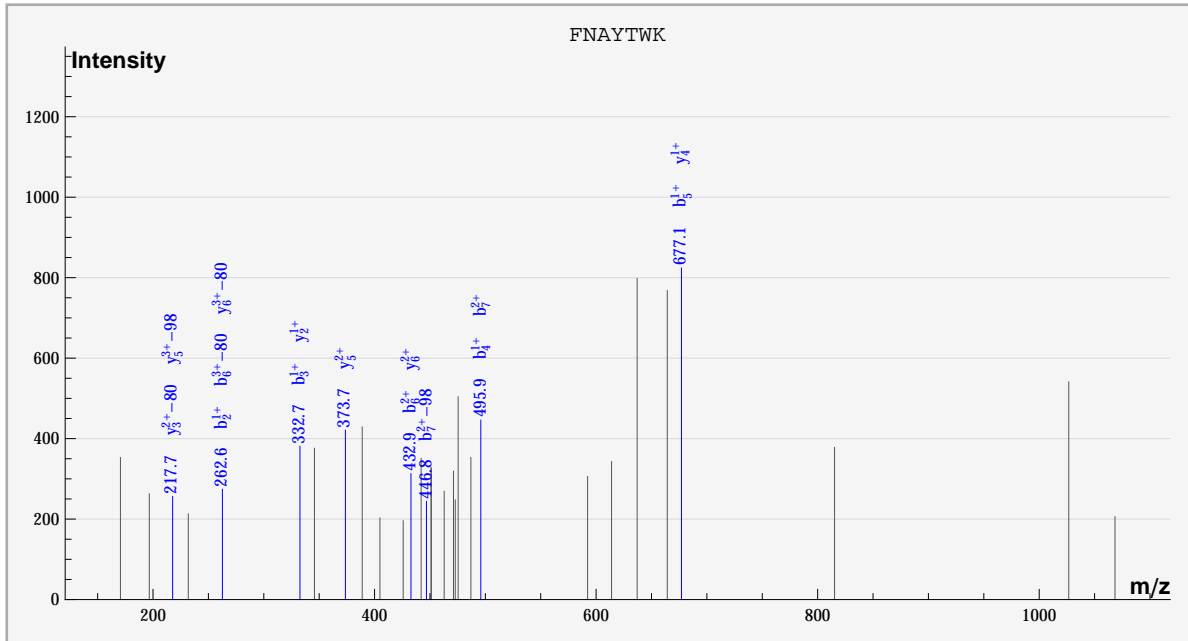

|   | # | b | b* | # | y | y* | P | P* |
|---|---|---|----|---|---|----|---|----|
| F | 1 |   |    |   |   |    |   |    |
| N | 2 | ✓ |    | 6 | ✓ | ✓  |   |    |
| A | 3 | ✓ |    | 5 | ✓ | ✓  |   |    |
| Y | 4 | ✓ |    | 4 | ✓ |    |   |    |
| T | 5 | ✓ |    | 3 |   | ✓  |   |    |
| W | 6 | ✓ | ✓  | 2 | ✓ |    |   |    |
| K | 7 | ✓ | ✓  | 1 |   |    |   |    |

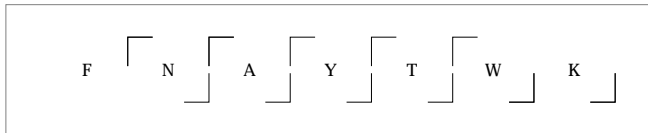

dbValid true MSQLGSYK Oxidation\_M(1),PHOS(1) 2. 507. -1.79336 5.89957 100. ? 2118.  
 S\_Acido\_new%gil68567867|gb|AAY80796.1| MSQLGSYK%:Oxidation\_M:::::PHOS::%sample\_1%cmpd\_763

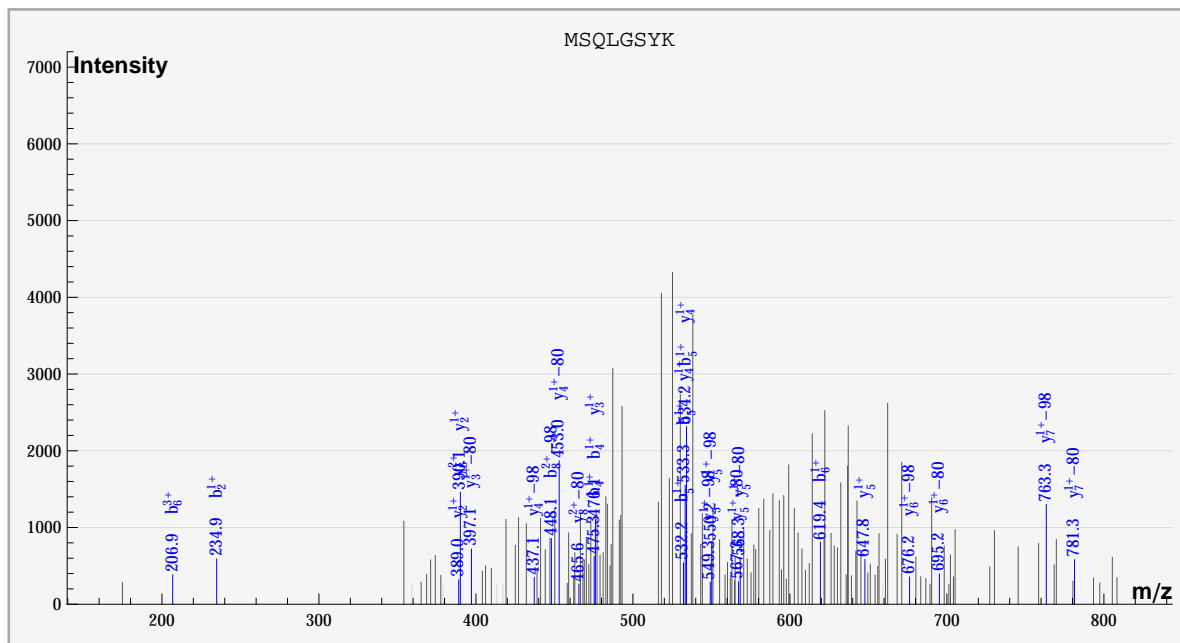

|   | # | b | b* | # | y | y* | P | P* |
|---|---|---|----|---|---|----|---|----|
| M | 1 |   |    |   |   |    |   | ✓  |
| S | 2 | ✓ |    | 7 |   | ✓  |   |    |
| Q | 3 |   |    | 6 | ✓ | ✓  |   |    |
| L | 4 | ✓ |    | 5 | ✓ | ✓  |   |    |
| G | 5 | ✓ |    | 4 | ✓ | ✓  |   |    |
| S | 6 | ✓ |    | 3 | ✓ | ✓  |   |    |
| Y | 7 |   |    | 2 | ✓ |    |   |    |
| K | 8 |   | ✓  | 1 |   |    |   |    |

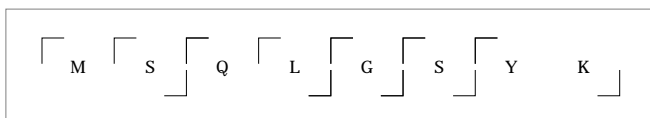

dbValid true NLGYEIVK PHOS(1) 2. 507. 1.24662 5.08099 100. ? 2742.  
 S\_Acido\_new%gi|68566538|gb|AA79467.1| NLGYEIVK%:::PHOS:::%sample\_1%cmpd\_1390

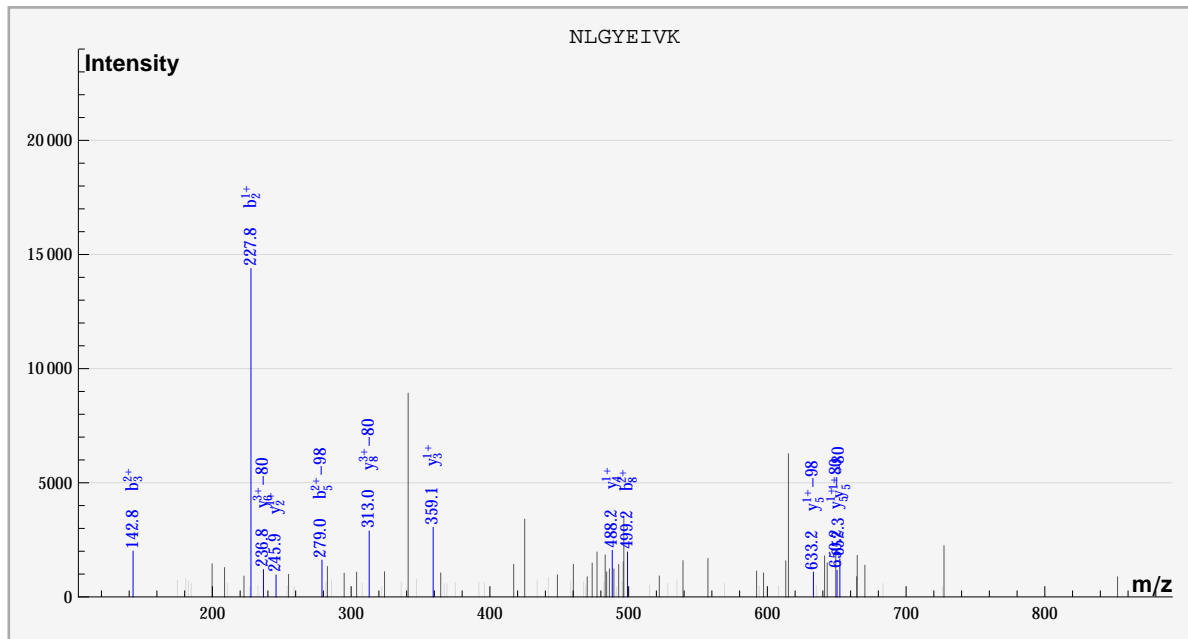

|   | # | b | b* | # | y | y* | P | P* |
|---|---|---|----|---|---|----|---|----|
| N | 1 |   |    |   |   |    |   | ✓  |
| L | 2 | ✓ |    | 7 |   |    |   |    |
| G | 3 | ✓ |    | 6 |   | ✓  |   |    |
| Y | 4 |   |    | 5 |   | ✓  |   |    |
| E | 5 |   | ✓  | 4 | ✓ |    |   |    |
| I | 6 |   |    | 3 | ✓ |    |   |    |
| V | 7 |   |    | 2 | ✓ |    |   |    |
| K | 8 | ✓ |    | 1 |   |    |   |    |

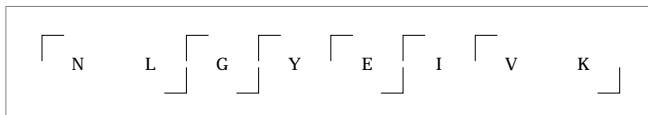

dbValid true GKSVTTPGRK PHOS(1) 2. 507. -1.73687 4.87848 100. ? 3438.  
 S\_Acido\_new%gil68567445|gb|AAY80374.1| GKSVTTPGRK%:::PHOS:::sample\_0%cmpd\_1818

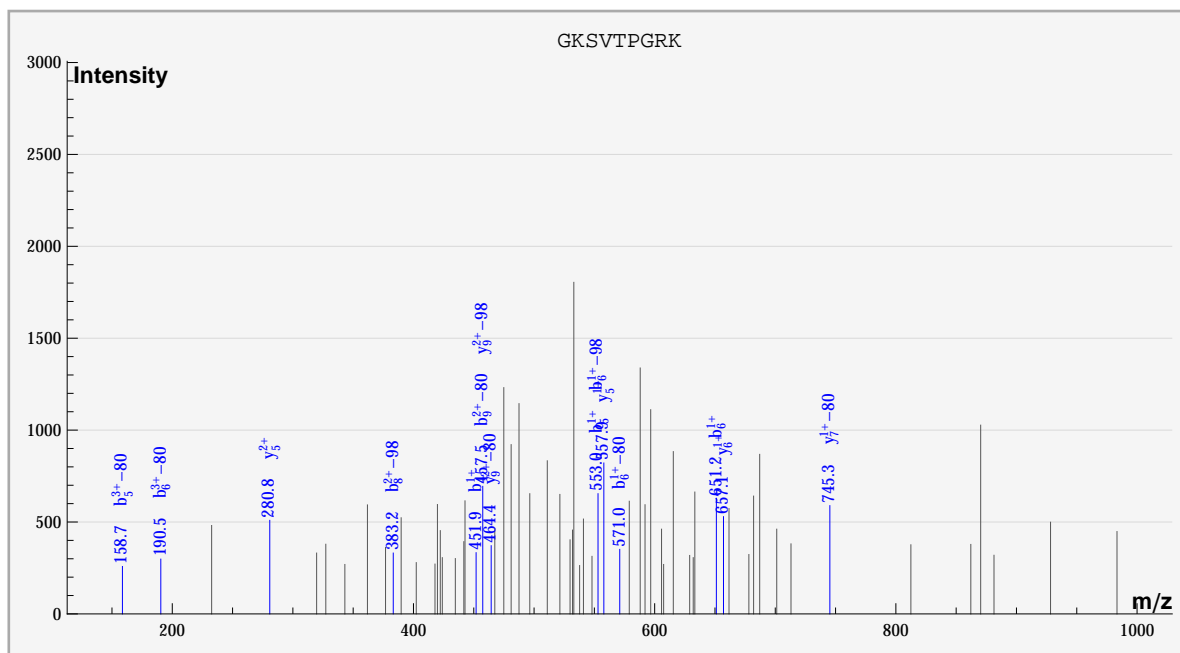

|   | # | b | b* | # | y | y* | P | P* |
|---|---|---|----|---|---|----|---|----|
| G | 1 |   |    |   |   |    |   | ✓  |
| K | 2 |   |    | 8 |   |    |   |    |
| S | 3 |   |    | 7 |   | ✓  |   |    |
| V | 4 | ✓ |    | 6 | ✓ |    |   |    |
| T | 5 | ✓ | ✓  | 5 | ✓ |    |   |    |
| P | 6 | ✓ | ✓  | 4 |   |    |   |    |
| G | 7 |   |    | 3 |   |    |   |    |
| R | 8 |   | ✓  | 2 |   |    |   |    |
| K | 9 |   | ✓  | 1 |   |    |   |    |

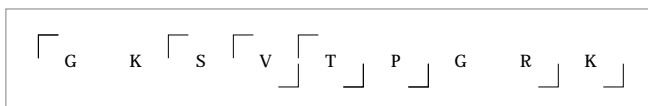



dbValid true RSVLVKTK PHOS(1) 2. 507. -1.20847 4.94452 100. ? 3618.

S\_Acido\_new%gi|68567850|gb|AAY80779.1| RSVLVKTK%:::PHOS::%sample\_0%cmpd\_1968

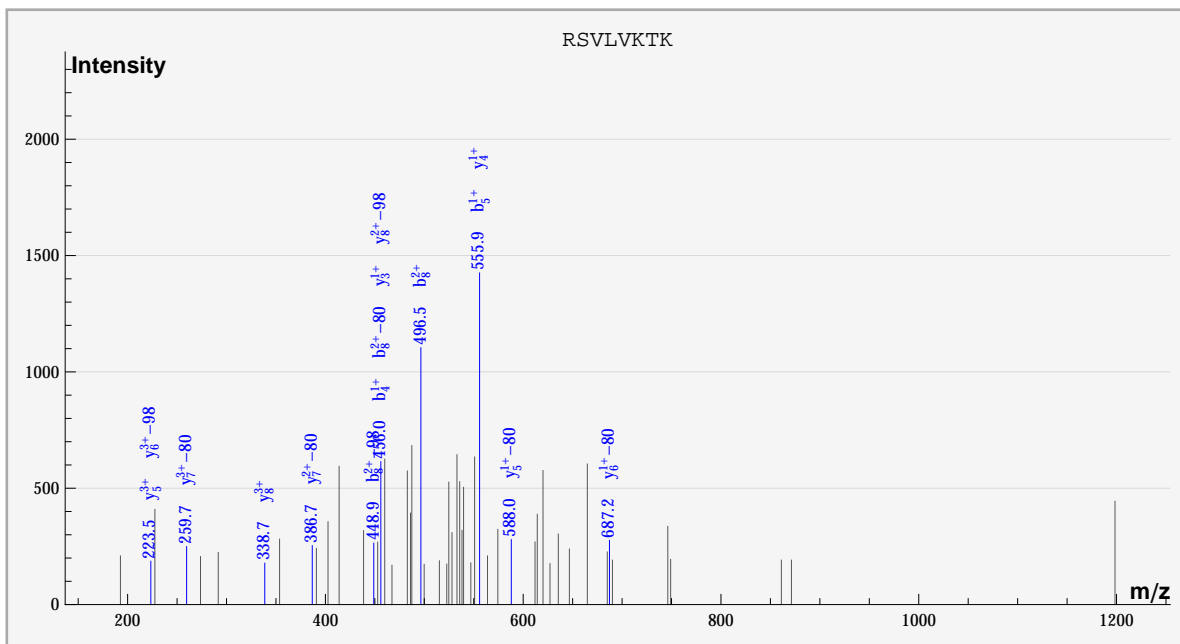

|   | # | b | b* | # | y | y* | P | P* |
|---|---|---|----|---|---|----|---|----|
| R | 1 |   |    |   |   |    | ✓ | ✓  |
| S | 2 |   |    | 7 |   | ✓  |   |    |
| V | 3 |   |    | 6 |   | ✓  |   |    |
| L | 4 | ✓ |    | 5 | ✓ | ✓  |   |    |
| V | 5 | ✓ |    | 4 | ✓ |    |   |    |
| K | 6 |   |    | 3 | ✓ |    |   |    |
| T | 7 |   |    | 2 |   |    |   |    |
| K | 8 | ✓ | ✓  | 1 |   |    |   |    |

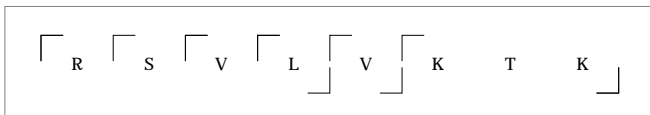

dbValid true KYYSKLK PHOS(1) 2. 507. -1.74047 5.25776 100. ? 3834.  
 S\_Acido\_new%gi68567417|gb|AAY80346.1| KYYSKLK%::::PHOS::::%sample\_0%compd\_2148

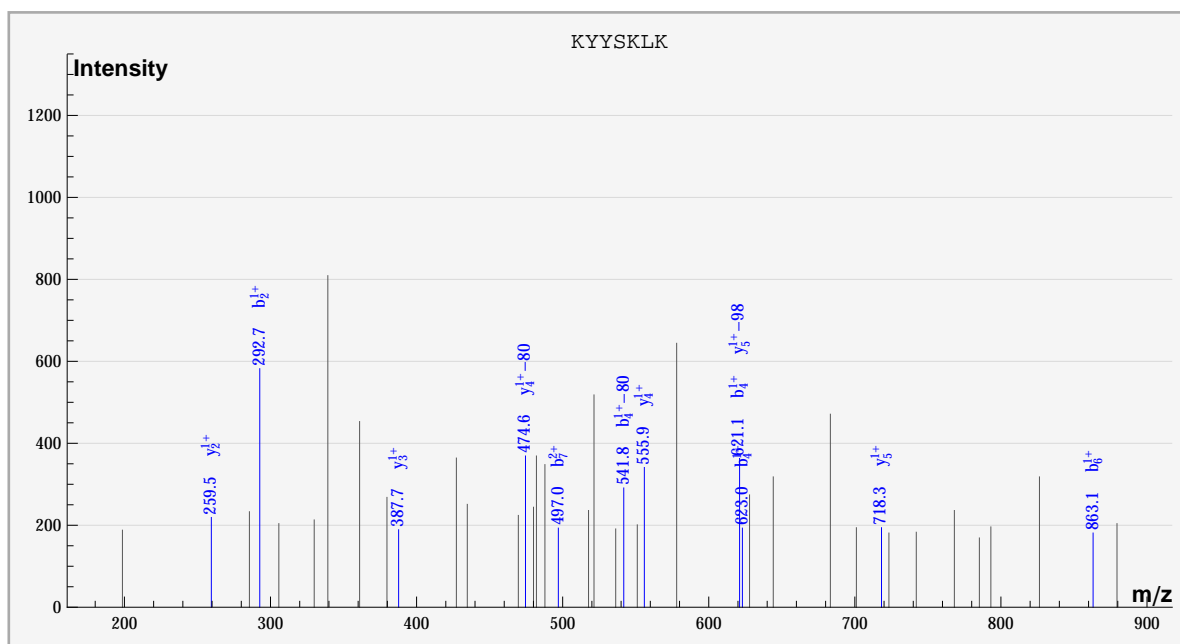

|   | # | b | b* | # | y | y* | P | P* |
|---|---|---|----|---|---|----|---|----|
| K | 1 |   |    |   |   |    |   |    |
| Y | 2 | ✓ |    | 6 |   |    |   |    |
| Y | 3 |   |    | 5 | ✓ | ✓  |   |    |
| S | 4 | ✓ | ✓  | 4 | ✓ | ✓  |   |    |
| K | 5 |   |    | 3 | ✓ |    |   |    |
| L | 6 | ✓ |    | 2 | ✓ |    |   |    |
| K | 7 | ✓ |    | 1 |   |    |   |    |

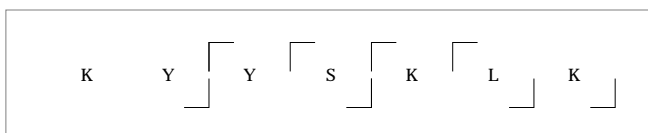

dbValid true DYYGREK PHOS(1) 2. 507. -1.29742 5.21328 100. ? 3966.

S\_Acido\_new%gi|68566571|gb|AAY79500.1| DYYGREK%::PHOS:::::sample\_0%compd\_2258

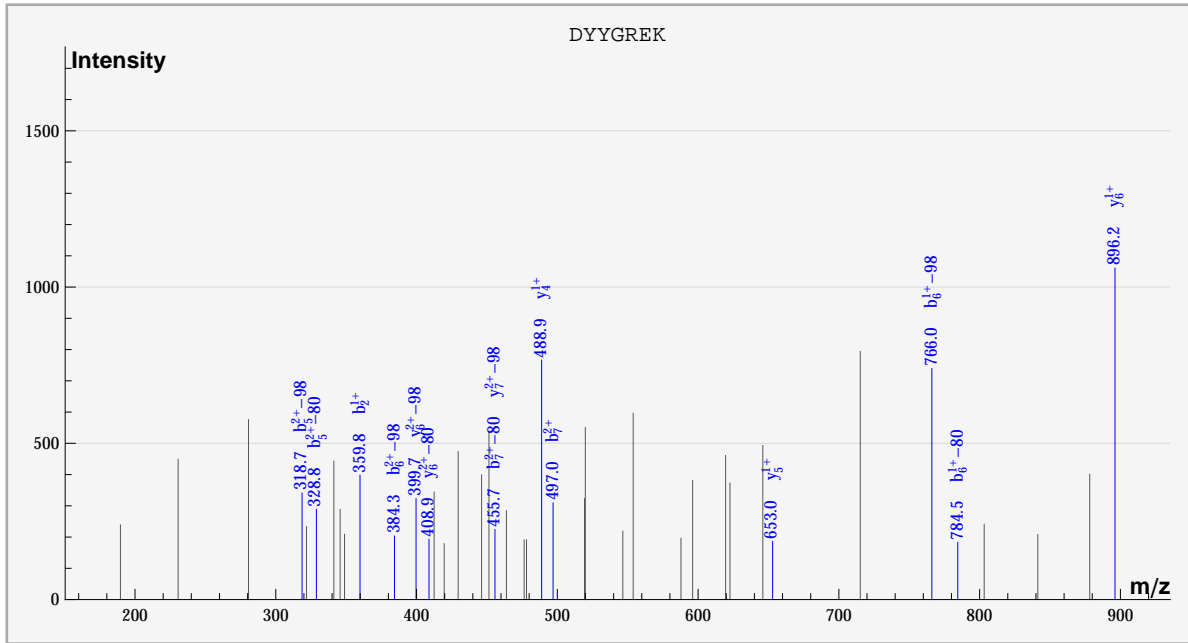

|   | # | b | b* | # | y | y* | P | P* |
|---|---|---|----|---|---|----|---|----|
| D | 1 |   |    |   |   |    |   | ✓  |
| Y | 2 | ✓ |    | 6 | ✓ | ✓  |   |    |
| Y | 3 |   |    | 5 | ✓ |    |   |    |
| G | 4 |   |    | 4 | ✓ |    |   |    |
| R | 5 |   | ✓  | 3 |   |    |   |    |
| E | 6 |   | ✓  | 2 |   |    |   |    |
| K | 7 | ✓ | ✓  | 1 |   |    |   |    |

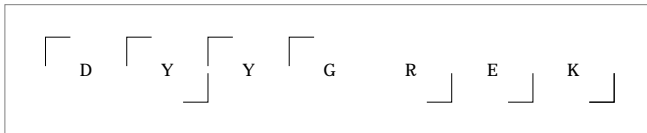

dbValid true YLVETPK PHOS(2) 2. 507. -1.79424 5.29019 100. ? 4488.  
 S\_Acido\_new%gi68566609|gb|AA79538.1| YLVETPK%:PHOS:::PHOS:::sample\_0%compd\_2697

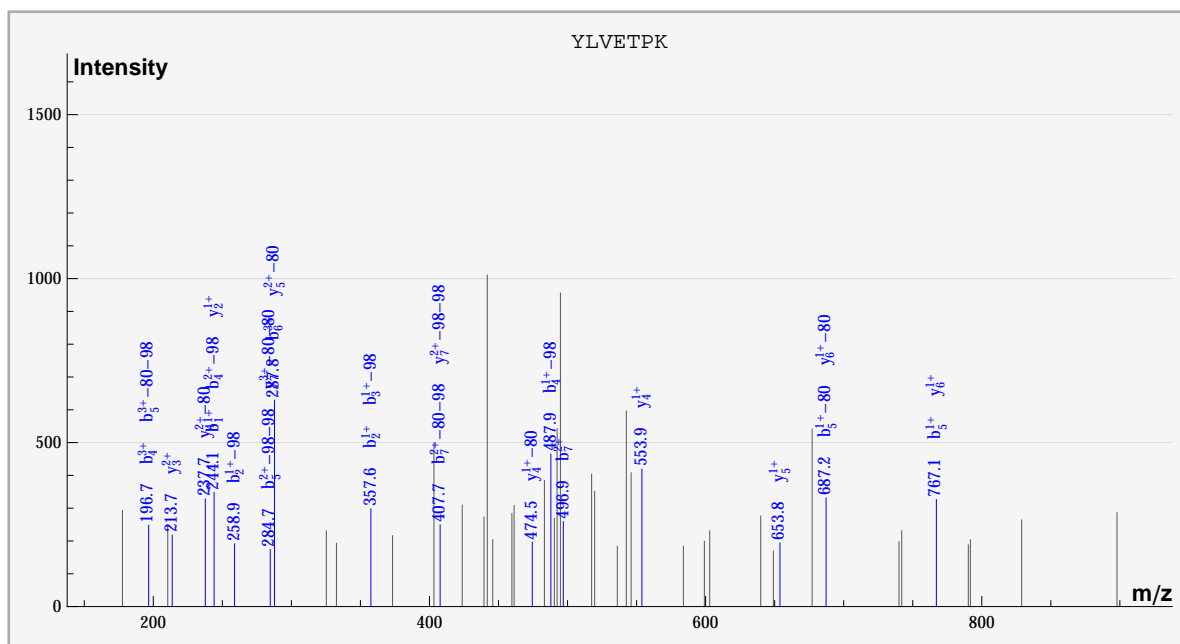

|   | # | b | b* | # | y | y* | P | P* |
|---|---|---|----|---|---|----|---|----|
| Y | 1 | ✓ |    |   |   |    |   | ✓  |
| L | 2 | ✓ | ✓  | 6 | ✓ | ✓  |   |    |
| V | 3 |   | ✓  | 5 | ✓ | ✓  |   |    |
| E | 4 | ✓ | ✓  | 4 | ✓ | ✓  |   |    |
| T | 5 | ✓ | ✓  | 3 | ✓ |    |   |    |
| P | 6 | ✓ |    | 2 | ✓ |    |   |    |
| K | 7 | ✓ | ✓  | 1 |   |    |   |    |

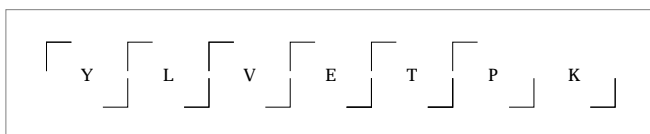

dbValid true YYELSEK PHOS(1) 2. 507. -0.792838 5.11011 100. ? 4512.  
 S\_Acido\_new%gi|68567767|gb|AAY80696.1| YYELSEK%:PHOS:::sample\_0%compd\_2717

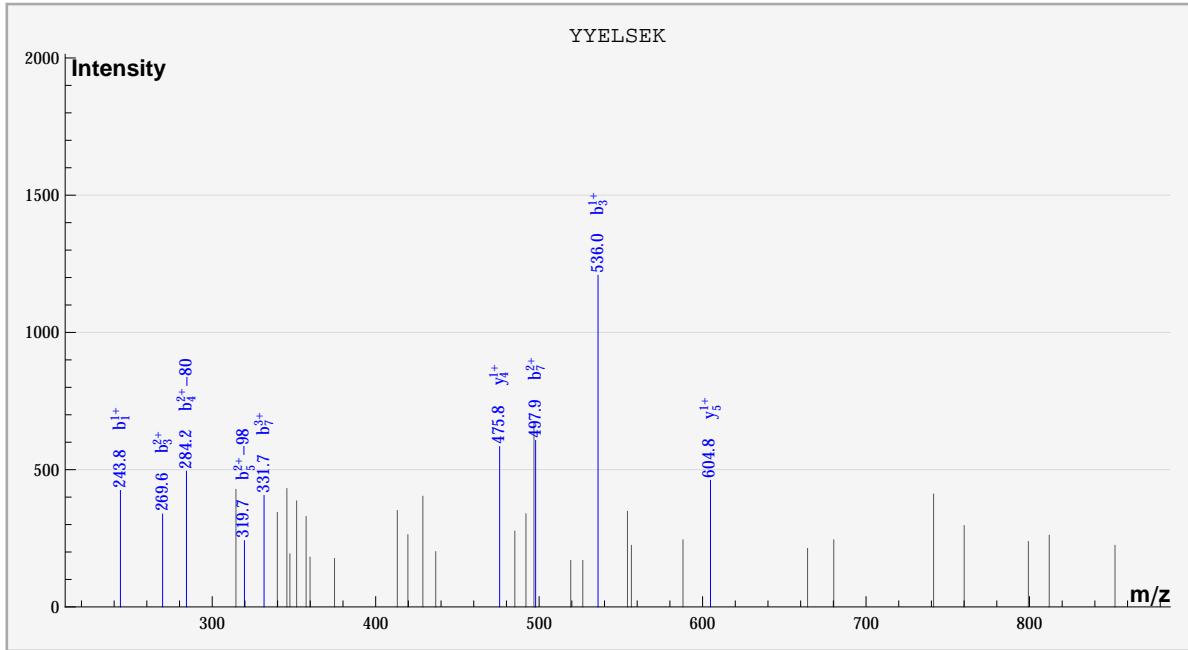

|   | # | b | b* | # | y | y* | P | P* |
|---|---|---|----|---|---|----|---|----|
| Y | 1 |   | ✓  |   |   |    |   |    |
| Y | 2 |   |    | 6 |   |    |   |    |
| E | 3 | ✓ |    | 5 | ✓ |    |   |    |
| L | 4 |   | ✓  | 4 | ✓ |    |   |    |
| S | 5 |   | ✓  | 3 |   |    |   |    |
| E | 6 |   |    | 2 |   |    |   |    |
| K | 7 | ✓ |    | 1 |   |    |   |    |

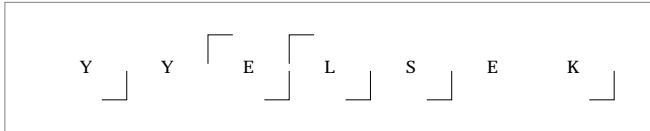

dbValid true SFSELLSR PHOS(1) 2. 508. 1.73388 5.27502 100. ? 1470.  
 S\_Acido\_new%gi|68568668|gb|AAY81597.1| SFSELLSR%:::PHOS:::sample\_1%compd\_241

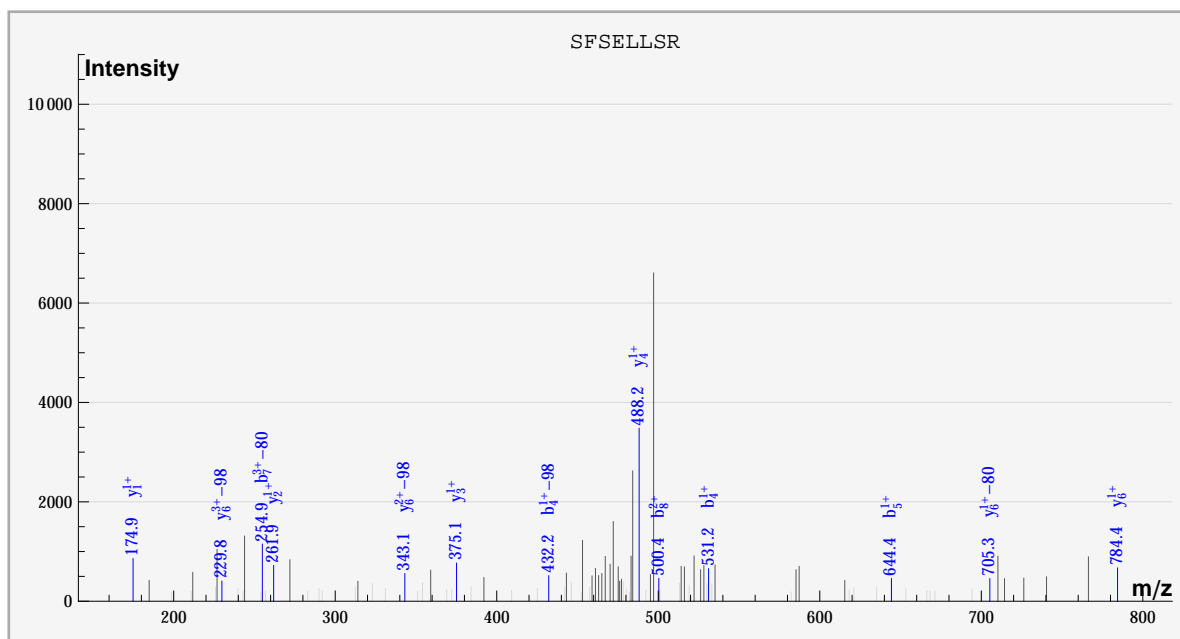

|   | # | b | b* | # | y | y* | P | P* |
|---|---|---|----|---|---|----|---|----|
| S | 1 |   |    |   |   |    |   |    |
| F | 2 |   |    | 7 |   |    |   |    |
| S | 3 |   |    | 6 | ✓ | ✓  |   |    |
| E | 4 | ✓ | ✓  | 5 |   |    |   |    |
| L | 5 | ✓ |    | 4 | ✓ |    |   |    |
| L | 6 |   |    | 3 | ✓ |    |   |    |
| S | 7 |   | ✓  | 2 | ✓ |    |   |    |
| R | 8 | ✓ |    | 1 | ✓ |    |   |    |

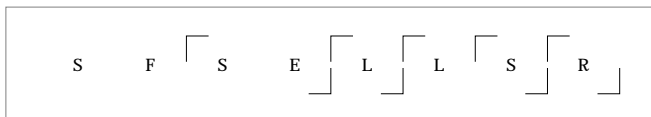

dbValid true YYGLTR PHOS(3) 2. 508. -1.3475 5.17471 100. ? 1602.

S\_Acido\_new%gii68568208|gb|AAy81137.1| YYGLTR%:PHOS:PHOS::PHOS::%sample\_1%compd\_328

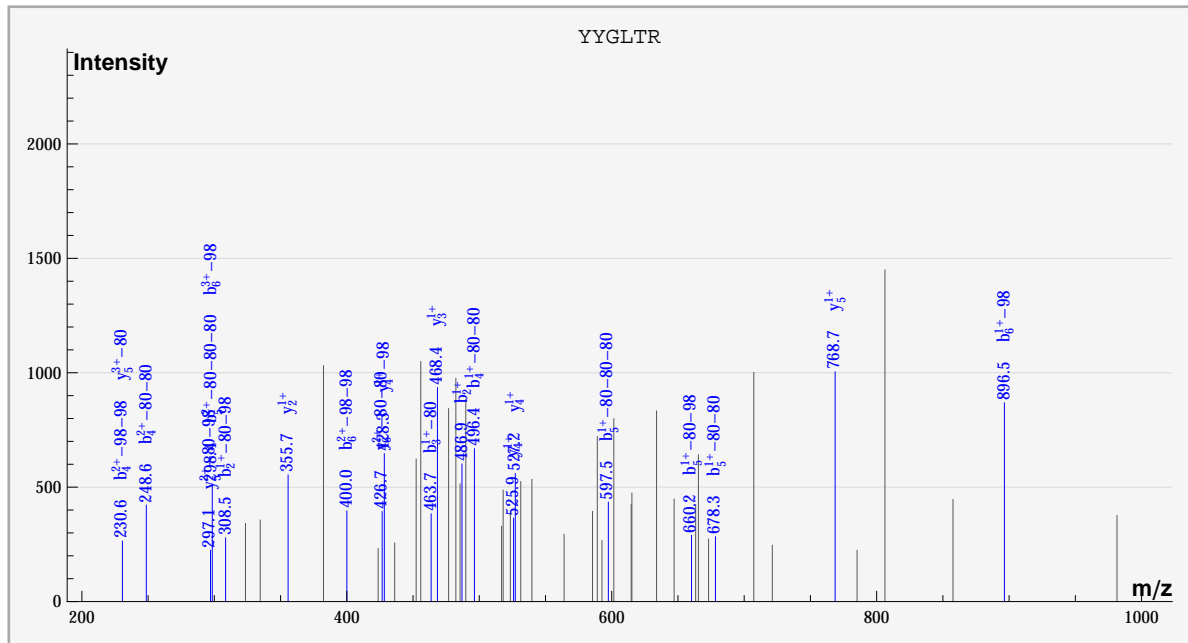

|   | # | b | b* | # | y | y* | P | P* |
|---|---|---|----|---|---|----|---|----|
| Y | 1 |   |    |   |   |    |   | ✓  |
| Y | 2 | ✓ | ✓  | 5 | ✓ | ✓  |   |    |
| G | 3 |   | ✓  | 4 | ✓ | ✓  |   |    |
| L | 4 |   | ✓  | 3 | ✓ |    |   |    |
| T | 5 |   | ✓  | 2 | ✓ |    |   |    |
| R | 6 |   | ✓  | 1 |   |    |   |    |

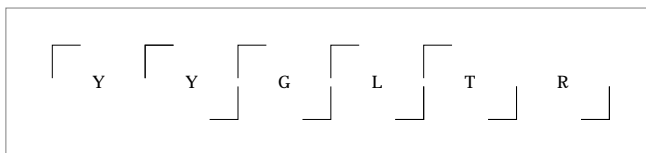

dbValid true DTAFLTGK PHOS(2) 2. 508. -1.30698 5.2563 100. ? 1776.  
 S\_Acido\_new%gi|68568548|gb|AAy81477.1| DTAFLTGK%::PHOS:::PHOS:::sample\_0%compd\_437

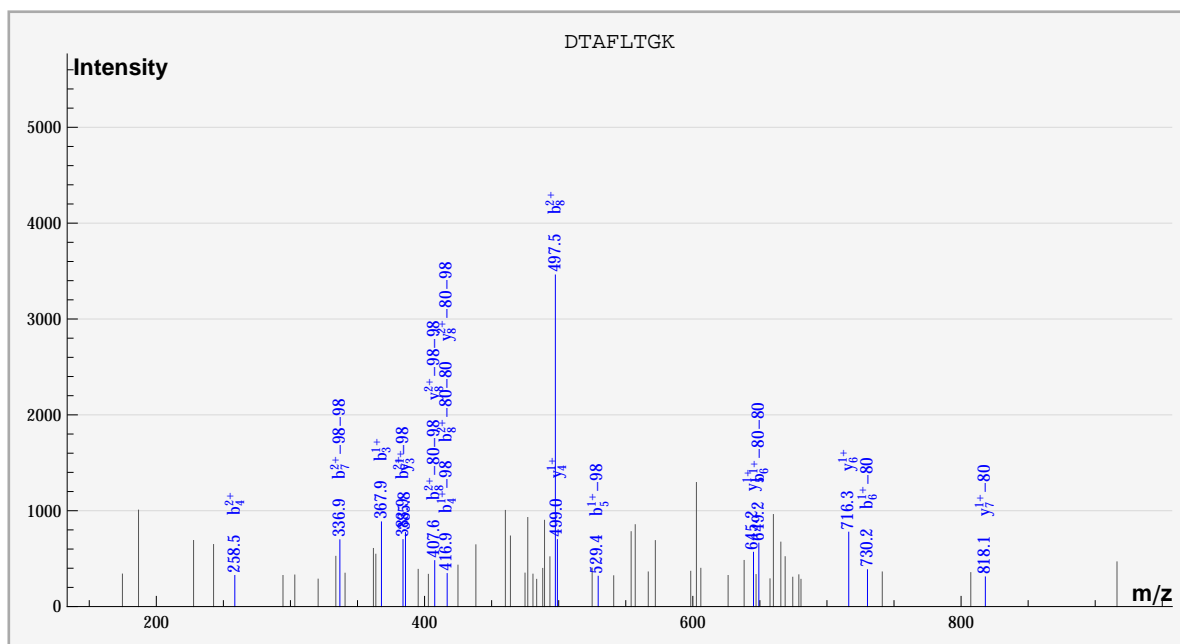

|   | # | b | b* | # | y | y* | P | P* |
|---|---|---|----|---|---|----|---|----|
| D | 1 |   |    |   |   |    |   | ✓  |
| T | 2 |   |    | 7 |   | ✓  |   |    |
| A | 3 | ✓ |    | 6 | ✓ |    |   |    |
| F | 4 | ✓ | ✓  | 5 | ✓ |    |   |    |
| L | 5 |   | ✓  | 4 | ✓ |    |   |    |
| T | 6 |   | ✓  | 3 | ✓ |    |   |    |
| G | 7 |   | ✓  | 2 |   |    |   |    |
| K | 8 | ✓ | ✓  | 1 |   |    |   |    |

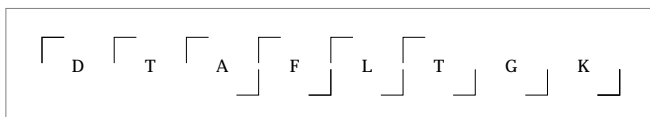



dbValid true YYAFQSR PHOS(1) 2. 508. -0.292333 5.20525 100. ? 3078.  
 S\_Acido\_new%gi|68566680|gb|AAY79609.1| YYAFQSR%:PHOS:::sample\_0%cmpd\_1518

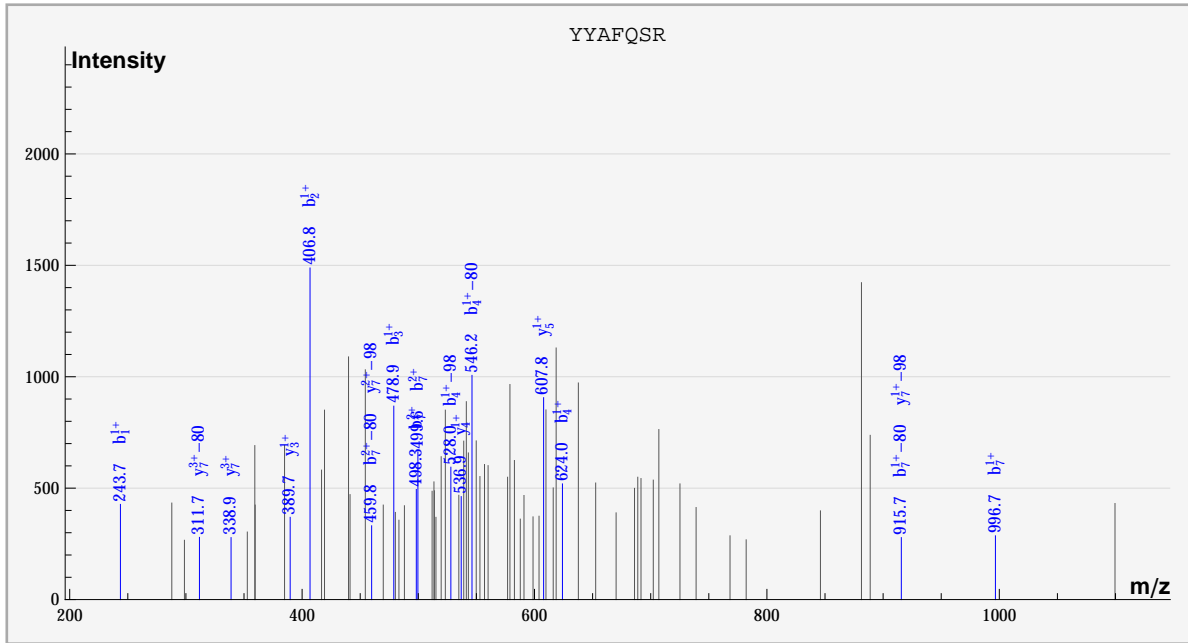

|   | # | b | b* | # | y | y* | P | P* |
|---|---|---|----|---|---|----|---|----|
| Y | 1 | ✓ |    |   |   |    | ✓ | ✓  |
| Y | 2 | ✓ |    | 6 |   |    |   |    |
| A | 3 | ✓ |    | 5 | ✓ |    |   |    |
| F | 4 | ✓ | ✓  | 4 | ✓ |    |   |    |
| Q | 5 |   |    | 3 | ✓ |    |   |    |
| S | 6 |   |    | 2 |   |    |   |    |
| R | 7 | ✓ | ✓  | 1 |   |    |   |    |

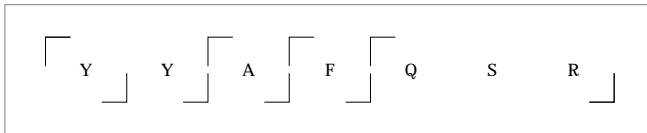

dbValid true RIANGCSR Cys\_CAM(1).PHOS(1) 2. 508. -0.779053 4.86201 100. ? 3294.  
 S\_Acido\_new%gil68568392|gb|AAY81321.1| RIANGCSR%:::Cys\_CAM:PHOS::%sample\_0%cmpd\_1698

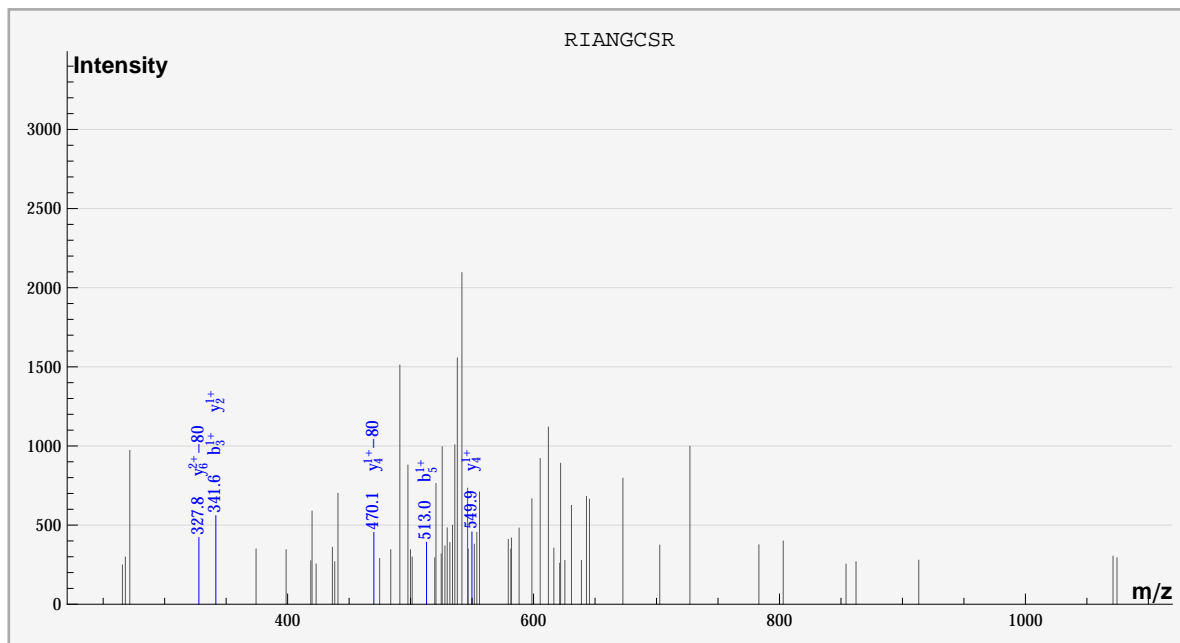

|   | # | b | b* | # | y | y* | P | P* |
|---|---|---|----|---|---|----|---|----|
| R | 1 |   |    |   |   |    |   |    |
| I | 2 |   |    | 7 |   |    |   |    |
| A | 3 | ✓ |    | 6 |   | ✓  |   |    |
| N | 4 |   |    | 5 |   |    |   |    |
| G | 5 | ✓ |    | 4 | ✓ | ✓  |   |    |
| C | 6 |   |    | 3 |   |    |   |    |
| S | 7 |   |    | 2 | ✓ |    |   |    |
| R | 8 |   |    | 1 |   |    |   |    |

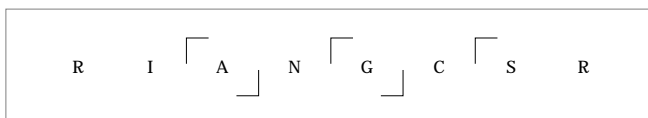

dbValid true ITTAITR PHOS(3) 2. 508. 0.186707 5.01302 100. ? 3702.

S\_Acido\_new%gi|68566904|gb|AAy79833.1| ITTAITR%::PHOS:PHOS::PHOS::%sample\_0%compd\_2039

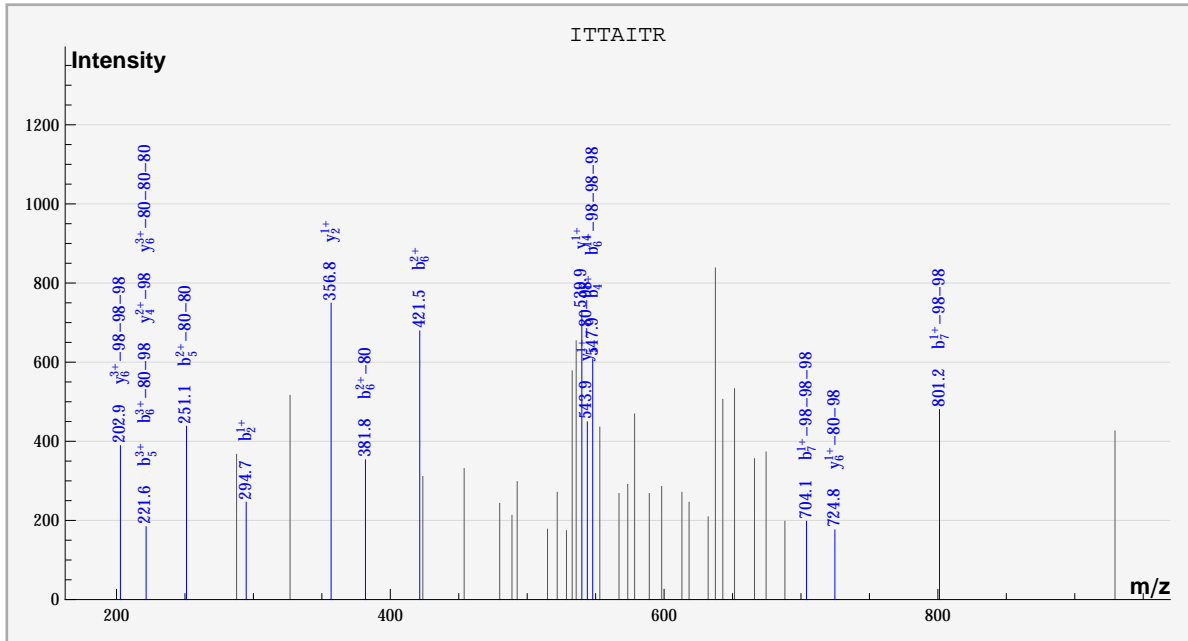

|   | # | b | b* | # | y | y* | P | P* |
|---|---|---|----|---|---|----|---|----|
| I | 1 |   |    |   |   |    |   |    |
| T | 2 | ✓ |    | 6 |   | ✓  |   |    |
| T | 3 |   |    | 5 |   | ✓  |   |    |
| A | 4 | ✓ |    | 4 | ✓ | ✓  |   |    |
| I | 5 | ✓ | ✓  | 3 |   |    |   |    |
| T | 6 | ✓ | ✓  | 2 | ✓ |    |   |    |
| R | 7 |   | ✓  | 1 |   |    |   |    |

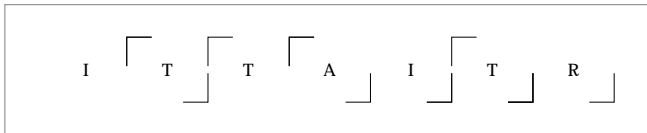

dbValid true KYYPKR PHOS(2) 2. 508. -0.285908 4.91394 100. ? 4440.  
 S\_Acido\_new%gi|68567340|gb|AAy80269.1| KYYPKR%::PHOS:PHOS:::sample\_0%cmpd\_2655

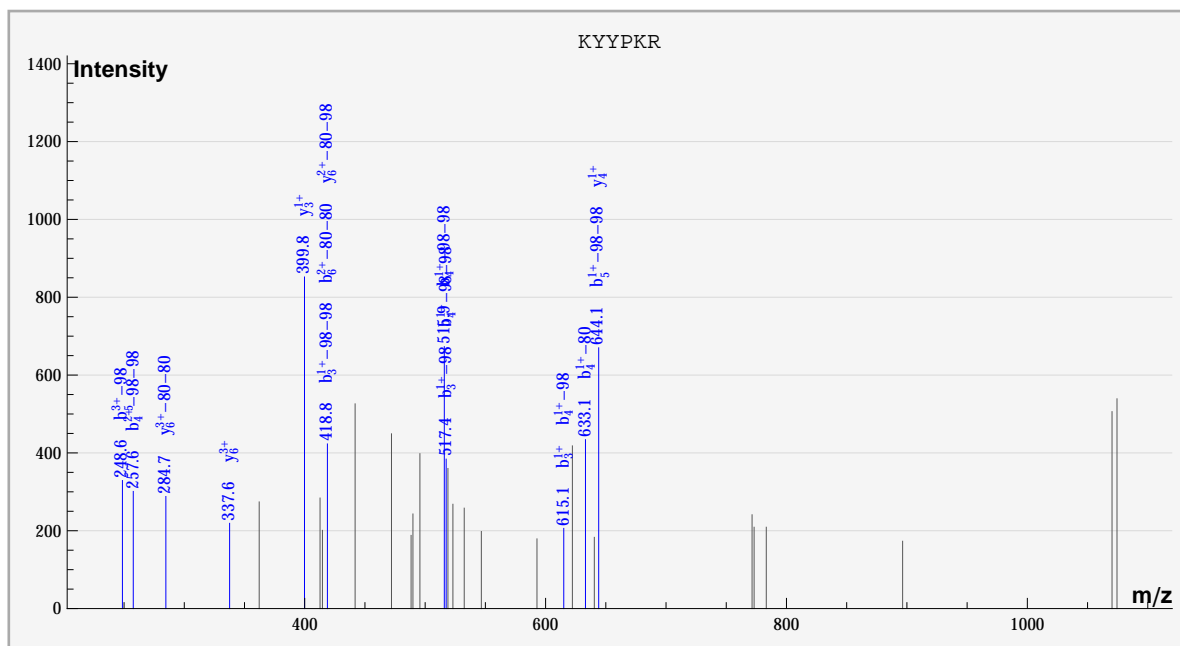

|   | # | b | b* | # | y | y* | P | P* |
|---|---|---|----|---|---|----|---|----|
| K | 1 |   |    |   |   |    | ✓ | ✓  |
| Y | 2 |   |    | 5 |   |    |   |    |
| Y | 3 | ✓ | ✓  | 4 | ✓ |    |   |    |
| P | 4 |   | ✓  | 3 | ✓ |    |   |    |
| K | 5 |   | ✓  | 2 |   |    |   |    |
| R | 6 |   | ✓  | 1 |   |    |   |    |

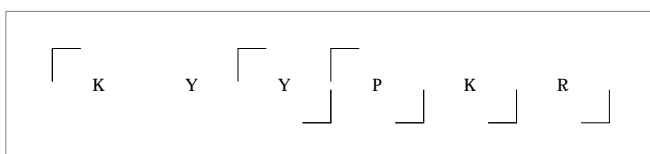

dbValid true FRNALYR PHOS(1) 2. 509. 1.24475 5.2405 100. ? 1626.  
 S\_Acido\_new%gi68567555|gb|AAY80484.1| FRNALYR%:::PHOS::%sample\_1%compd\_350

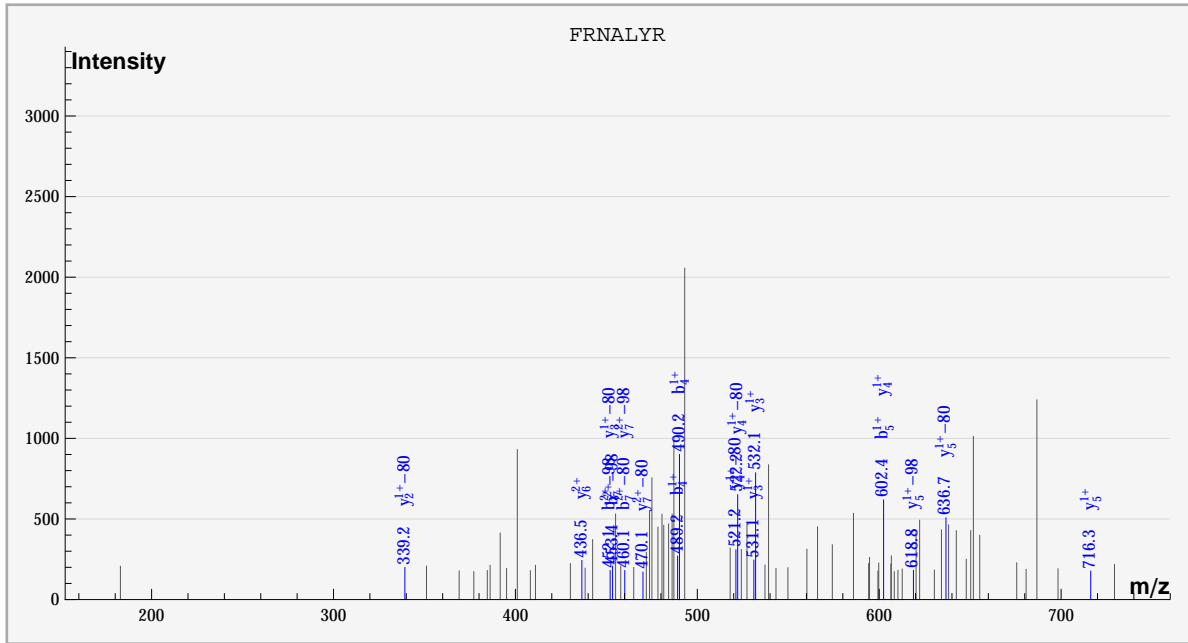

|   | # | b | b* | # | y | y* | P | P* |
|---|---|---|----|---|---|----|---|----|
| F | 1 |   |    |   |   |    |   | ✓  |
| R | 2 |   |    | 6 | ✓ |    |   |    |
| N | 3 |   |    | 5 | ✓ | ✓  |   |    |
| A | 4 | ✓ |    | 4 | ✓ | ✓  |   |    |
| L | 5 | ✓ |    | 3 | ✓ | ✓  |   |    |
| Y | 6 |   |    | 2 |   | ✓  |   |    |
| R | 7 |   | ✓  | 1 |   |    |   |    |

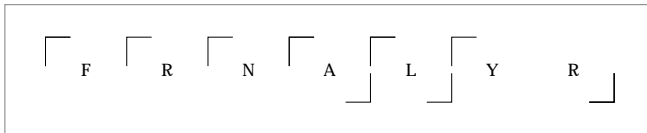

dbValid true FRNALYR PHOS(1) 2. 509. 1.24475 5.01215 100. ? 1650.  
 S\_Acido\_new%gi|68567555|gb|AAY80484.1| FRNALYR%:::PHOS:::sample\_1%compd\_370

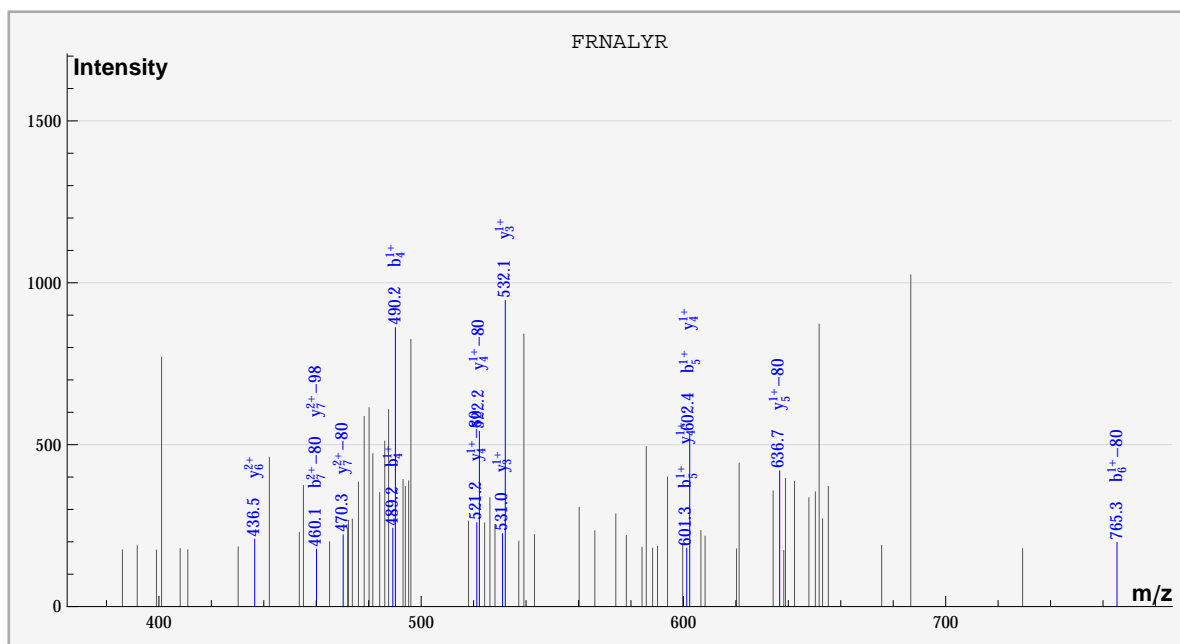

|   | # | b | b* | # | y | y* | P | P* |
|---|---|---|----|---|---|----|---|----|
| F | 1 |   |    |   |   |    |   | ✓  |
| R | 2 |   |    | 6 | ✓ |    |   |    |
| N | 3 |   |    | 5 |   | ✓  |   |    |
| A | 4 | ✓ |    | 4 | ✓ | ✓  |   |    |
| L | 5 | ✓ |    | 3 | ✓ |    |   |    |
| Y | 6 |   | ✓  | 2 |   |    |   |    |
| R | 7 |   | ✓  | 1 |   |    |   |    |

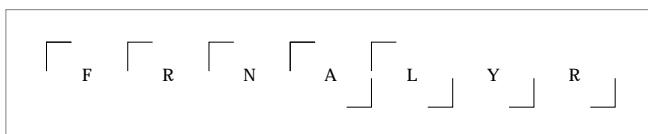

dbValid true FRNALYR PHOS(1) 2. 509. 1.24475 5.3041 100. ? 1698.

S\_Acido\_new%gi|68567555|gb|AAY80484.1| FRNALYR%:::PHOS::%sample\_1%compd\_411

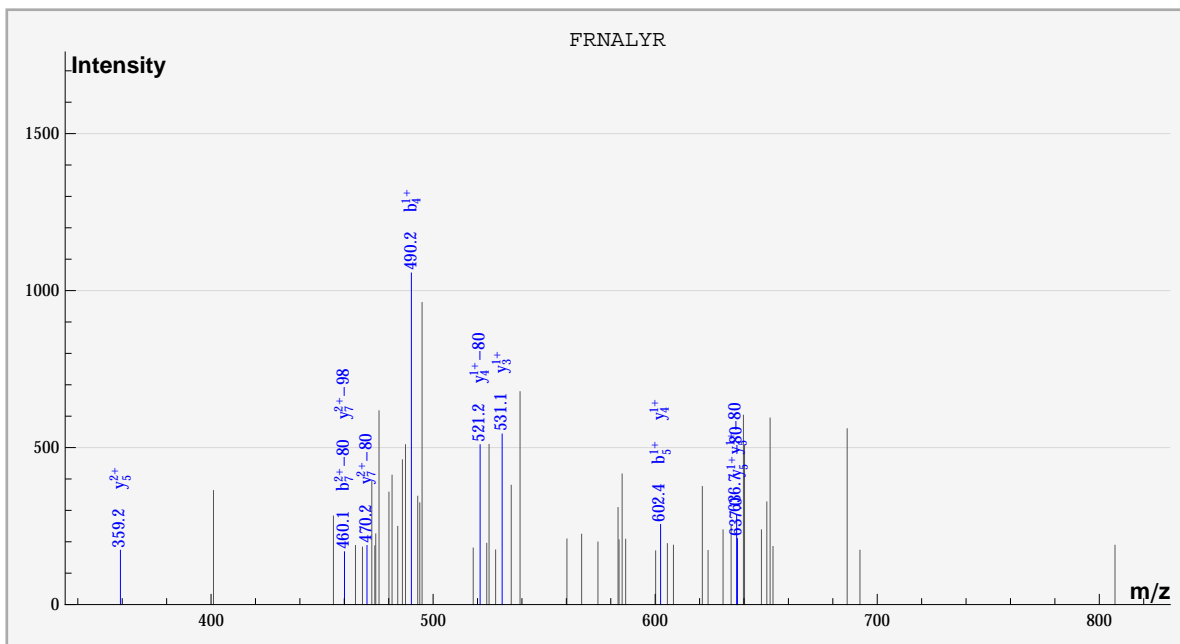

|   | # | b | b* | # | y | y* | P | P* |
|---|---|---|----|---|---|----|---|----|
| F | 1 |   |    |   |   |    |   | ✓  |
| R | 2 |   |    | 6 |   |    |   |    |
| N | 3 |   |    | 5 | ✓ | ✓  |   |    |
| A | 4 | ✓ |    | 4 | ✓ | ✓  |   |    |
| L | 5 | ✓ |    | 3 | ✓ |    |   |    |
| Y | 6 |   |    | 2 |   |    |   |    |
| R | 7 |   | ✓  | 1 |   |    |   |    |

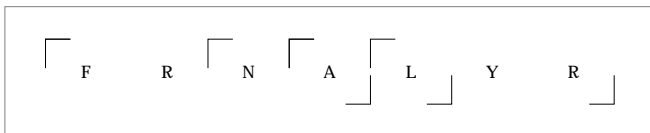

dbValid true EDIDAMSR PHOS(1) 2. 509. -0.308648 5.06082 100. ? 2472.  
 S\_Acido\_new%gi|68568565|gb|AAY81494.1| EDIDAMSR%:::::PHOS::%sample\_1%compd\_1069

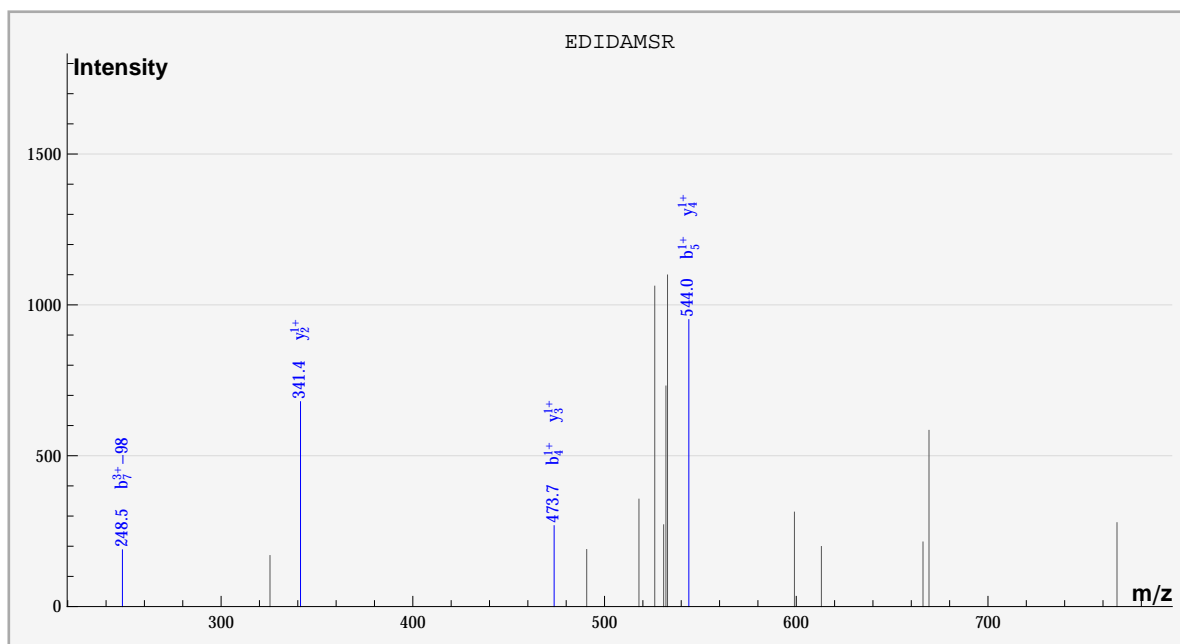

|   | # | b | b* | # | y | y* | P | P* |
|---|---|---|----|---|---|----|---|----|
| E | 1 |   |    |   |   |    |   |    |
| D | 2 |   |    | 7 |   |    |   |    |
| I | 3 |   |    | 6 |   |    |   |    |
| D | 4 | ✓ |    | 5 |   |    |   |    |
| A | 5 | ✓ |    | 4 | ✓ |    |   |    |
| M | 6 |   |    | 3 | ✓ |    |   |    |
| S | 7 |   | ✓  | 2 | ✓ |    |   |    |
| R | 8 |   |    | 1 |   |    |   |    |

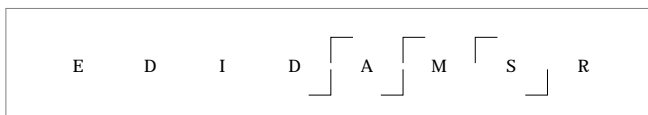



dbValid true TRTTGRTGATIGVR PHOS(1) 3. 509. 0.598135 5.02906 100. ? 2520.  
 S\_Acido\_new%gi|68566578|gb|AA79507.1| TRTTGRTGATIGVR%:PHOS:::sample\_1%cmpd\_1097

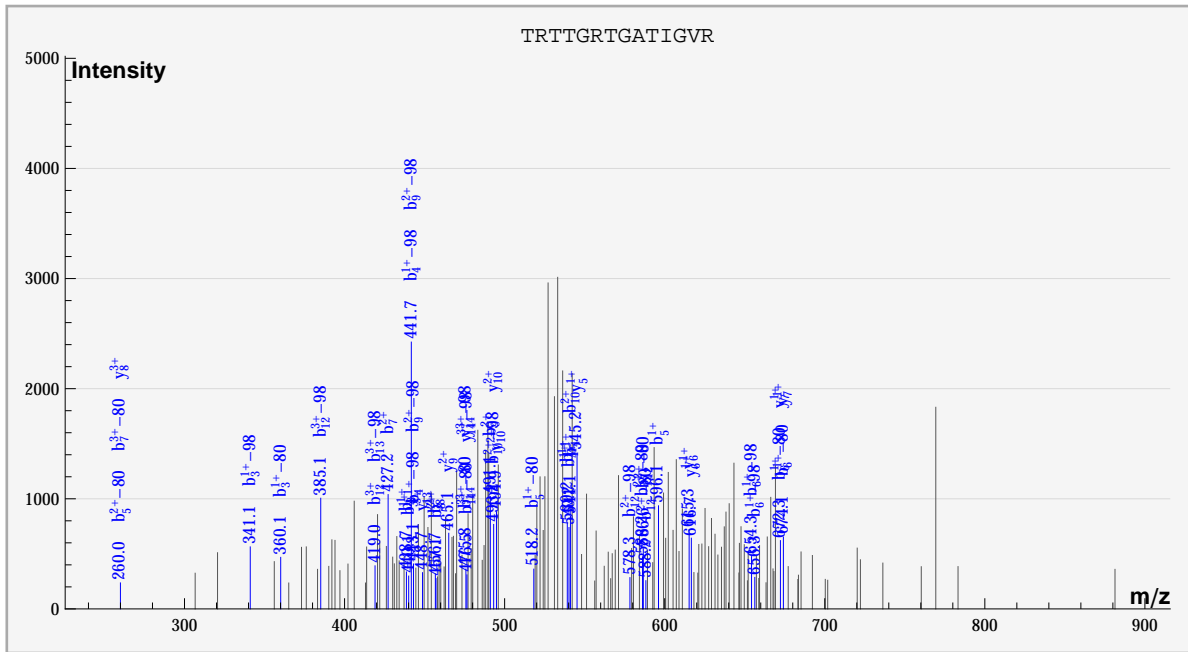

|   | #  | b | b* | #  | y | y* | P | P* |
|---|----|---|----|----|---|----|---|----|
| T | 1  |   |    |    |   |    |   | ✓  |
| R | 2  |   |    | 13 | ✓ |    |   |    |
| T | 3  | ✓ | ✓  | 12 |   |    |   |    |
| T | 4  | ✓ | ✓  | 11 |   |    |   |    |
| G | 5  | ✓ | ✓  | 10 | ✓ |    |   |    |
| R | 6  |   | ✓  | 9  | ✓ |    |   |    |
| T | 7  | ✓ | ✓  | 8  | ✓ |    |   |    |
| G | 8  | ✓ | ✓  | 7  | ✓ |    |   |    |
| A | 9  | ✓ | ✓  | 6  | ✓ |    |   |    |
| T | 10 | ✓ | ✓  | 5  | ✓ |    |   |    |
| I | 11 |   |    | 4  |   |    |   |    |
| G | 12 | ✓ | ✓  | 3  |   |    |   |    |
| V | 13 |   | ✓  | 2  |   |    |   |    |
| R | 14 |   | ✓  | 1  |   |    |   |    |

[ T [ R [ T ] T ] G [ R [ T ] G [ A [ T ] I [ G ] V ] R ]

dbValid true ILNTITYP PHOS(1) 2. 509. -1.251 4.84181 100. ? 3126.  
 S\_Acido\_new%gi|68567897|gb|AA80826.1| ILNTITYP%:::PHOS::%sample\_0%compd\_1559

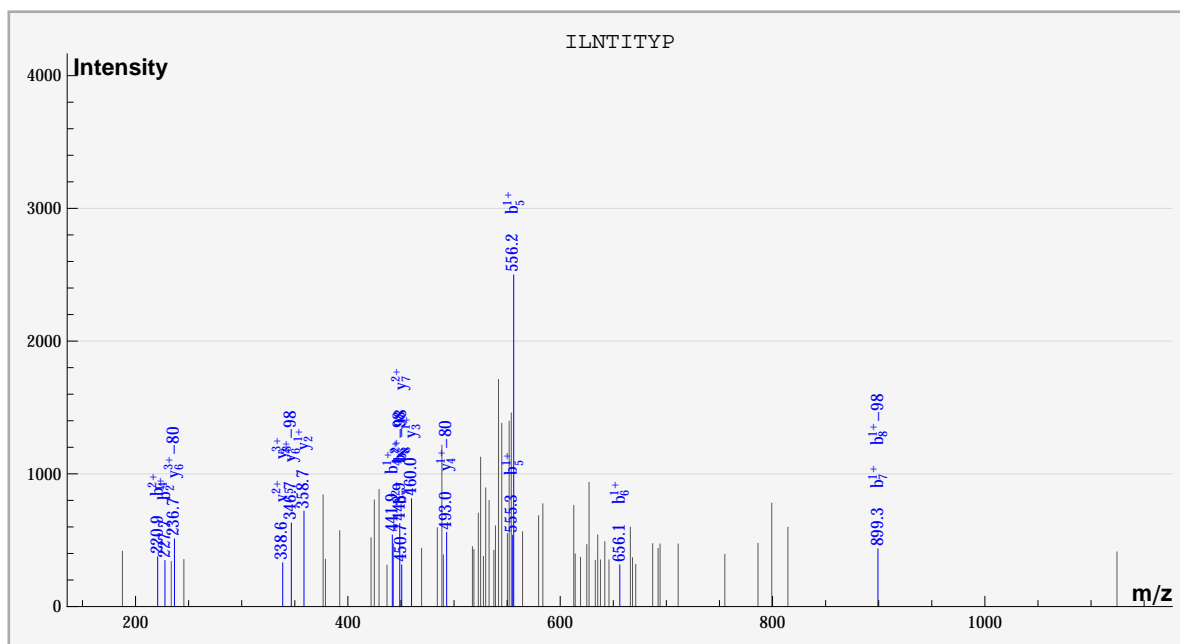

|   | # | b | b* | # | y | y* | P | P* |
|---|---|---|----|---|---|----|---|----|
| I | 1 |   |    |   |   |    |   | ✓  |
| L | 2 | ✓ |    | 7 | ✓ |    |   |    |
| N | 3 |   |    | 6 |   | ✓  |   |    |
| T | 4 | ✓ |    | 5 | ✓ |    |   |    |
| I | 5 | ✓ |    | 4 |   | ✓  |   |    |
| T | 6 | ✓ |    | 3 | ✓ |    |   |    |
| Y | 7 | ✓ |    | 2 | ✓ |    |   |    |
| P | 8 |   | ✓  | 1 |   |    |   |    |

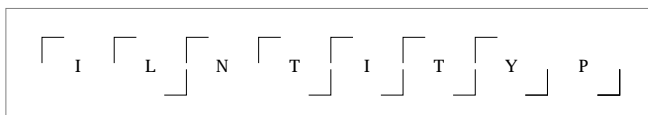

dbValid true ILIYLFR PHOS(1) 2. 509. 0.280262 5.23663 100. ? 3132.

S\_Acido\_new%gi|68568039|gb|AAY80968.1| ILIYLFR%::::PHOS::::%sample\_1%cmpd\_1613

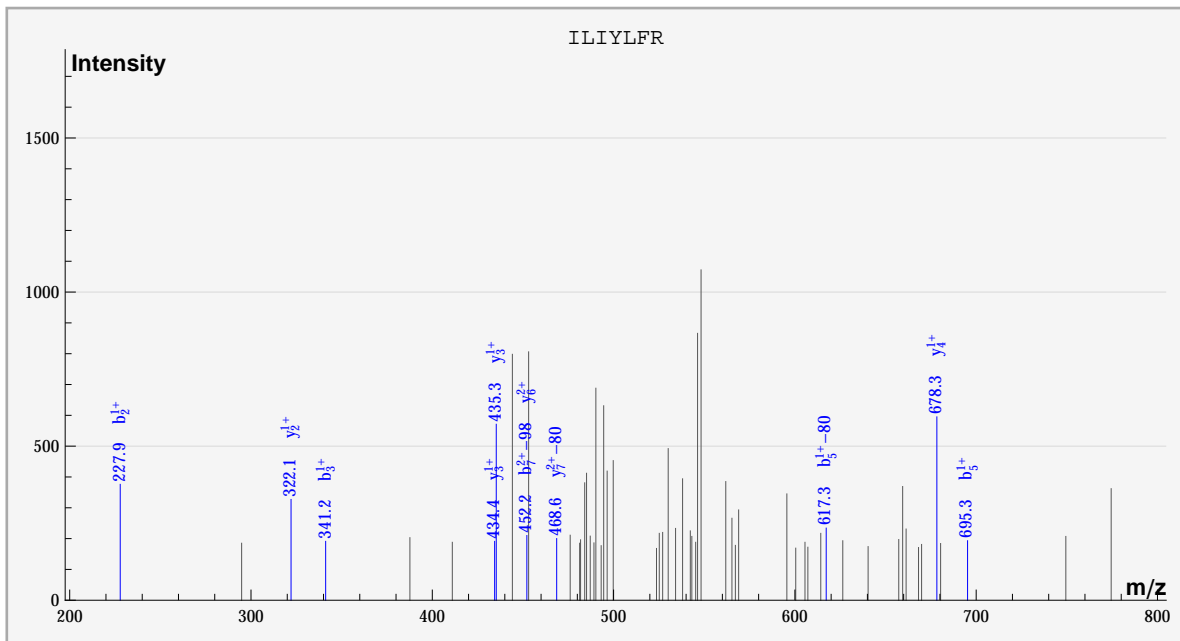

|   | # | b | b* | # | y | y* | P | P* |
|---|---|---|----|---|---|----|---|----|
| I | 1 |   |    |   |   |    |   | ✓  |
| L | 2 | ✓ |    | 6 | ✓ |    |   |    |
| I | 3 | ✓ |    | 5 |   |    |   |    |
| Y | 4 |   |    | 4 | ✓ |    |   |    |
| L | 5 | ✓ | ✓  | 3 | ✓ |    |   |    |
| F | 6 |   |    | 2 | ✓ |    |   |    |
| R | 7 |   | ✓  | 1 |   |    |   |    |

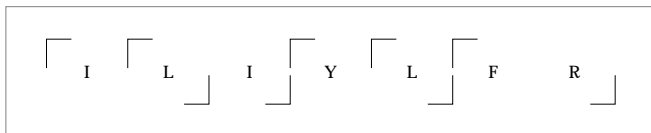

dbValid true ILIYLFR PHOS(1) 2. 509. 0.280262 5.73002 100. ? 3156.

S\_Acido\_new%gi|68568039|gb|AAY80968.1| ILIYLFR%::::PHOS::::%sample\_1%compd\_1633

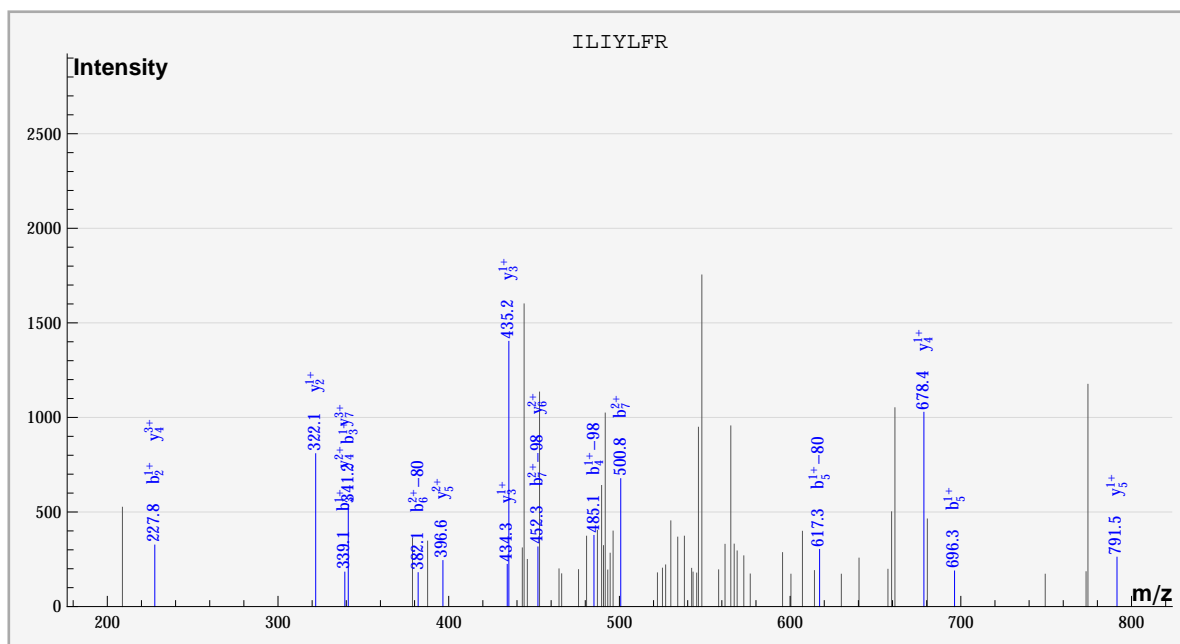

|   | # | b | b* | # | y | y* | P | P* |
|---|---|---|----|---|---|----|---|----|
| I | 1 |   |    |   |   |    |   | ✓  |
| L | 2 | ✓ |    | 6 | ✓ |    |   |    |
| I | 3 | ✓ |    | 5 | ✓ |    |   |    |
| Y | 4 |   | ✓  | 4 | ✓ |    |   |    |
| L | 5 | ✓ | ✓  | 3 | ✓ |    |   |    |
| F | 6 |   | ✓  | 2 | ✓ |    |   |    |
| R | 7 | ✓ | ✓  | 1 |   |    |   |    |

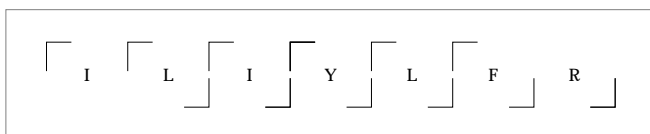

dbValid true ILIYLF R PHOS(1) 2. 509. 0.280262 6.39932 100. ? 3168.

S\_Acido\_new%gi|68568039|gb|AAY80968.1| ILIYLF R%::::PHOS::::%sample\_1%compd\_1644

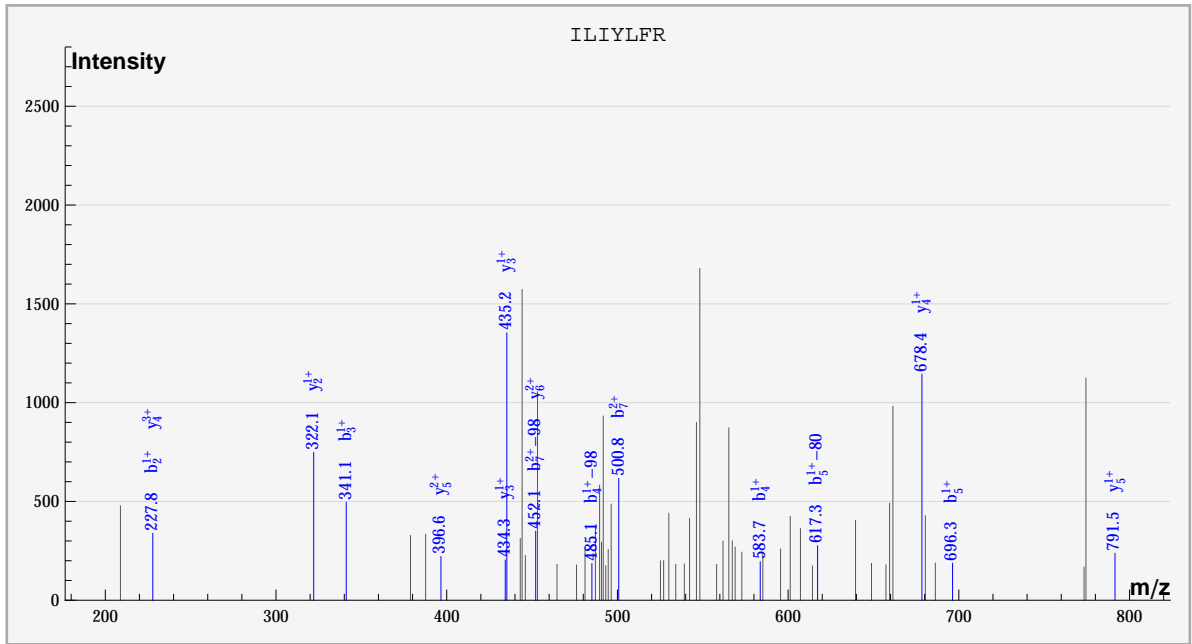

|   | # | b | b* | # | y | y* | P | P* |
|---|---|---|----|---|---|----|---|----|
| I | 1 |   |    |   |   |    |   |    |
| L | 2 | ✓ |    | 6 | ✓ |    |   |    |
| I | 3 | ✓ |    | 5 | ✓ |    |   |    |
| Y | 4 | ✓ | ✓  | 4 | ✓ |    |   |    |
| L | 5 | ✓ | ✓  | 3 | ✓ |    |   |    |
| F | 6 |   |    | 2 | ✓ |    |   |    |
| R | 7 | ✓ | ✓  | 1 |   |    |   |    |

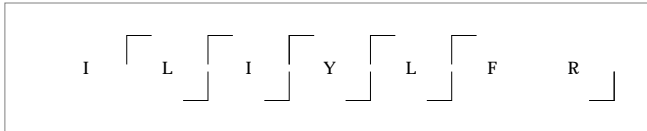

dbValid true ILIYLFR PHOS(1) 2. 509. 0.280262 5.92429 100. ? 3180.

S\_Acido\_new%gi|68568039|gb|AAY80968.1| ILIYLFR%::::PHOS::::%sample\_1%compd\_1654

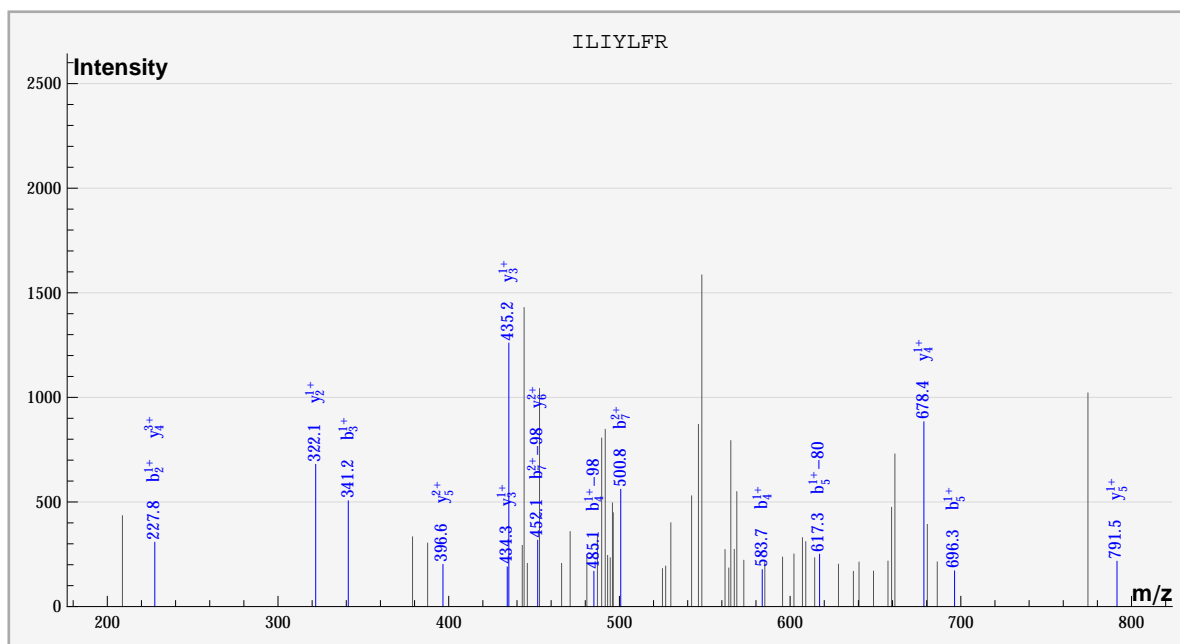

|   | # | b | b* | # | y | y* | P | P* |
|---|---|---|----|---|---|----|---|----|
| I | 1 |   |    |   |   |    |   |    |
| L | 2 | ✓ |    | 6 | ✓ |    |   |    |
| I | 3 | ✓ |    | 5 | ✓ |    |   |    |
| Y | 4 | ✓ | ✓  | 4 | ✓ |    |   |    |
| L | 5 | ✓ | ✓  | 3 | ✓ |    |   |    |
| F | 6 |   |    | 2 | ✓ |    |   |    |
| R | 7 | ✓ | ✓  | 1 |   |    |   |    |

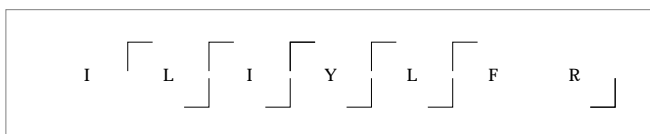

dbValid true ILIYLFR PHOS(1) 2. 509. 0.280262 5.63272 100. ? 3192.

S\_Acido\_new%gi|68568039|gb|AAY80968.1| ILIYLFR%:::PHOS:::%sample\_1%compd\_1664

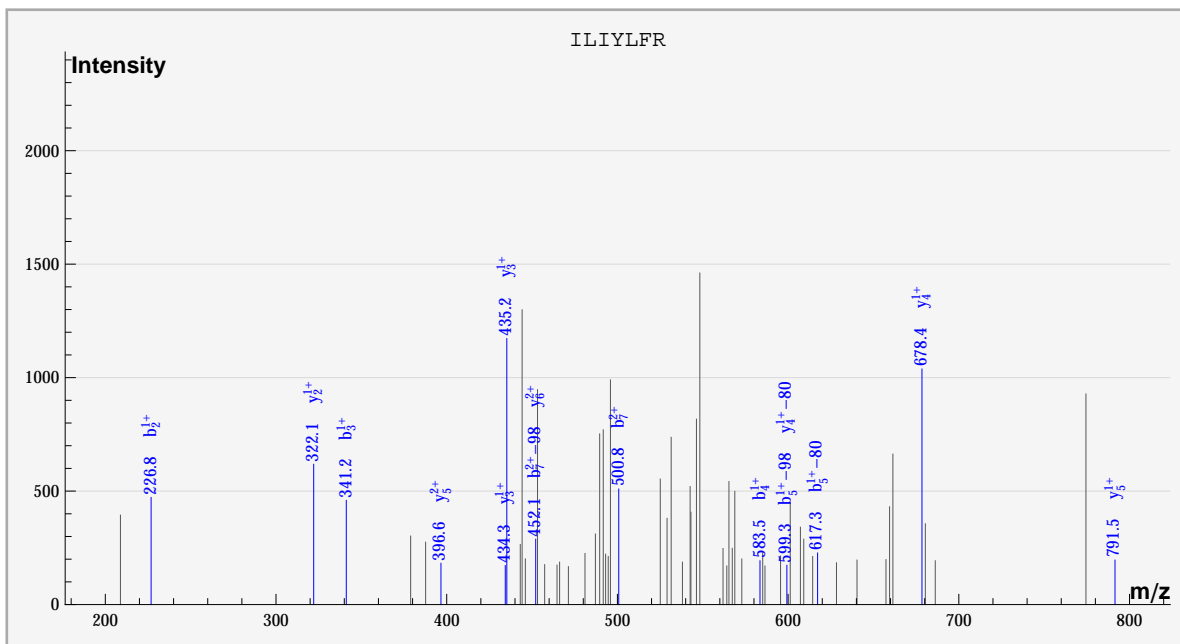

|   | # | b | b* | # | y | y* | P | P* |
|---|---|---|----|---|---|----|---|----|
| I | 1 |   |    |   |   |    |   |    |
| L | 2 | ✓ |    | 6 | ✓ |    |   |    |
| I | 3 | ✓ |    | 5 | ✓ |    |   |    |
| Y | 4 | ✓ |    | 4 | ✓ | ✓  |   |    |
| L | 5 |   | ✓  | 3 | ✓ |    |   |    |
| F | 6 |   |    | 2 | ✓ |    |   |    |
| R | 7 | ✓ | ✓  | 1 |   |    |   |    |

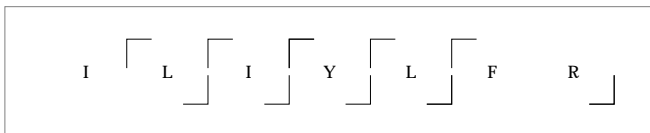

dbValid true ILIYLFR PHOS(1) 2. 509. 0.280262 5.95752 100. ? 3204.

S\_Acido\_new%gi|68568039|gb|AAY80968.1| ILIYLFR%::::PHOS:::%sample\_1%compd\_1674

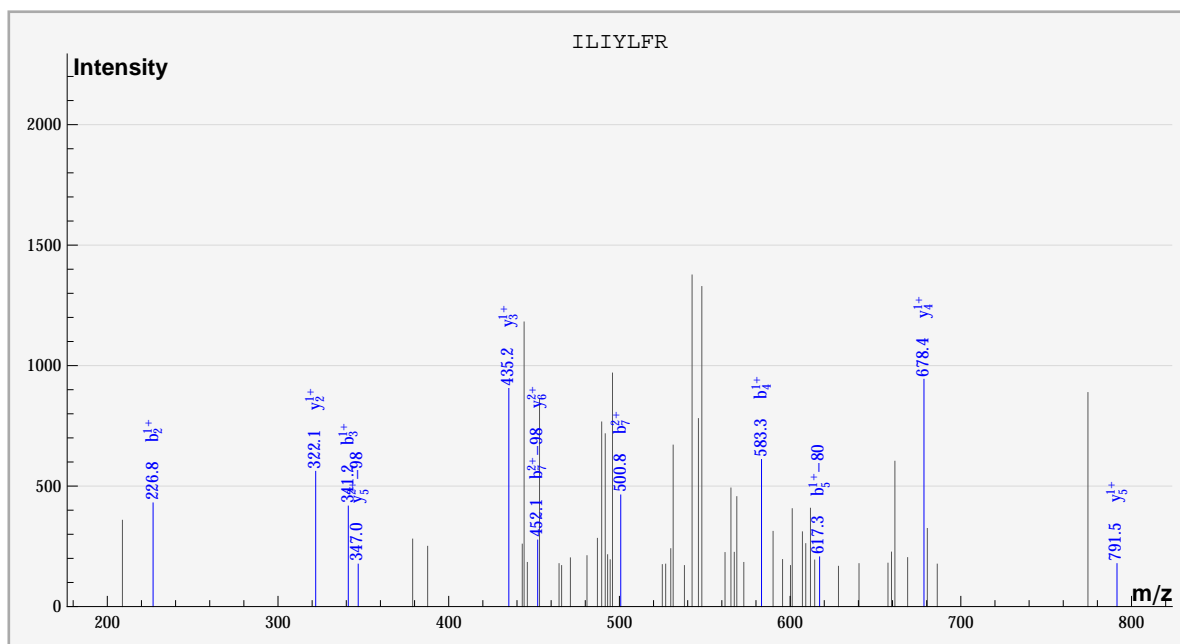

|   | # | b | b* | # | y | y* | P | P* |
|---|---|---|----|---|---|----|---|----|
| I | 1 |   |    |   |   |    |   |    |
| L | 2 | ✓ |    | 6 | ✓ |    |   |    |
| I | 3 | ✓ |    | 5 | ✓ | ✓  |   |    |
| Y | 4 | ✓ |    | 4 | ✓ |    |   |    |
| L | 5 |   | ✓  | 3 | ✓ |    |   |    |
| F | 6 |   |    | 2 | ✓ |    |   |    |
| R | 7 | ✓ | ✓  | 1 |   |    |   |    |

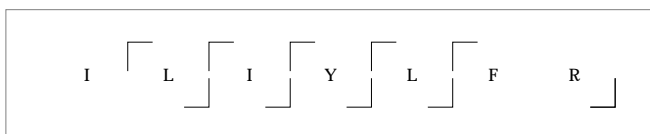



dbValid true ILIYLFR PHOS(1) 2. 509. 0.280262 5.83091 100. ? 3216.

S\_Acido\_new%gi|68568039|gb|AAY80968.1| ILIYLFR%::::PHOS::::%sample\_1%compd\_1684

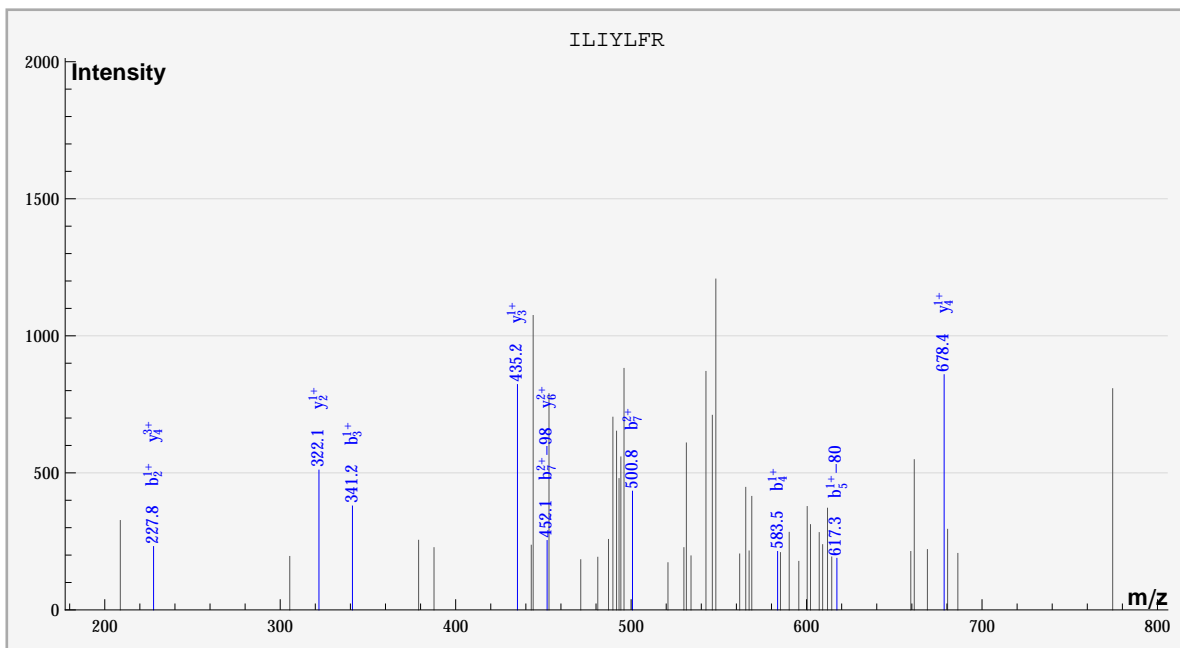

|   | # | b | b* | # | y | y* | P | P* |
|---|---|---|----|---|---|----|---|----|
| I | 1 |   |    |   |   |    |   |    |
| L | 2 | ✓ |    | 6 | ✓ |    |   |    |
| I | 3 | ✓ |    | 5 |   |    |   |    |
| Y | 4 | ✓ |    | 4 | ✓ |    |   |    |
| L | 5 |   | ✓  | 3 | ✓ |    |   |    |
| F | 6 |   |    | 2 | ✓ |    |   |    |
| R | 7 | ✓ | ✓  | 1 |   |    |   |    |

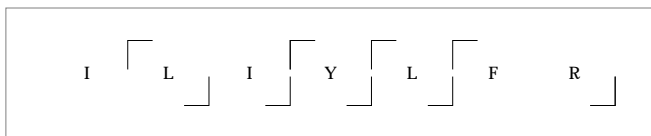

dbValid true ILIYLFR PHOS(1) 2. 509. 0.280262 6.0365 100. ? 3228.

S\_Acido\_new%gi|68568039|gb|AAY80968.1| ILIYLFR%::::PHOS::::%sample\_1%compd\_1694

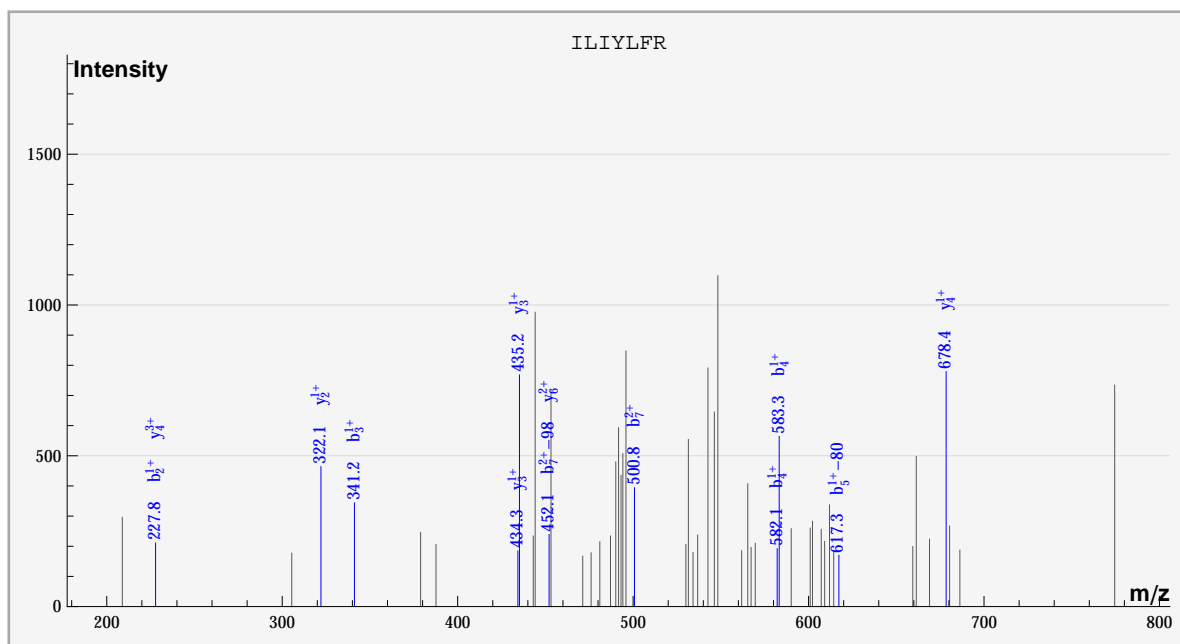

|   | # | b | b* | # | y | y* | P | P* |
|---|---|---|----|---|---|----|---|----|
| I | 1 |   |    |   |   |    |   |    |
| L | 2 | ✓ |    | 6 | ✓ |    |   |    |
| I | 3 | ✓ |    | 5 |   |    |   |    |
| Y | 4 | ✓ |    | 4 | ✓ |    |   |    |
| L | 5 |   | ✓  | 3 | ✓ |    |   |    |
| F | 6 |   |    | 2 | ✓ |    |   |    |
| R | 7 | ✓ | ✓  | 1 |   |    |   |    |

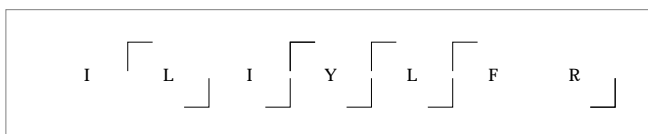

dbValid true ILIYLFR PHOS(1) 2. 509. 0.280262 5.55048 100. ? 3240.

S\_Acido\_new%gi68568039|gb|AAY80968.1| ILIYLFR%::::PHOS::::%sample\_1%compd\_1704

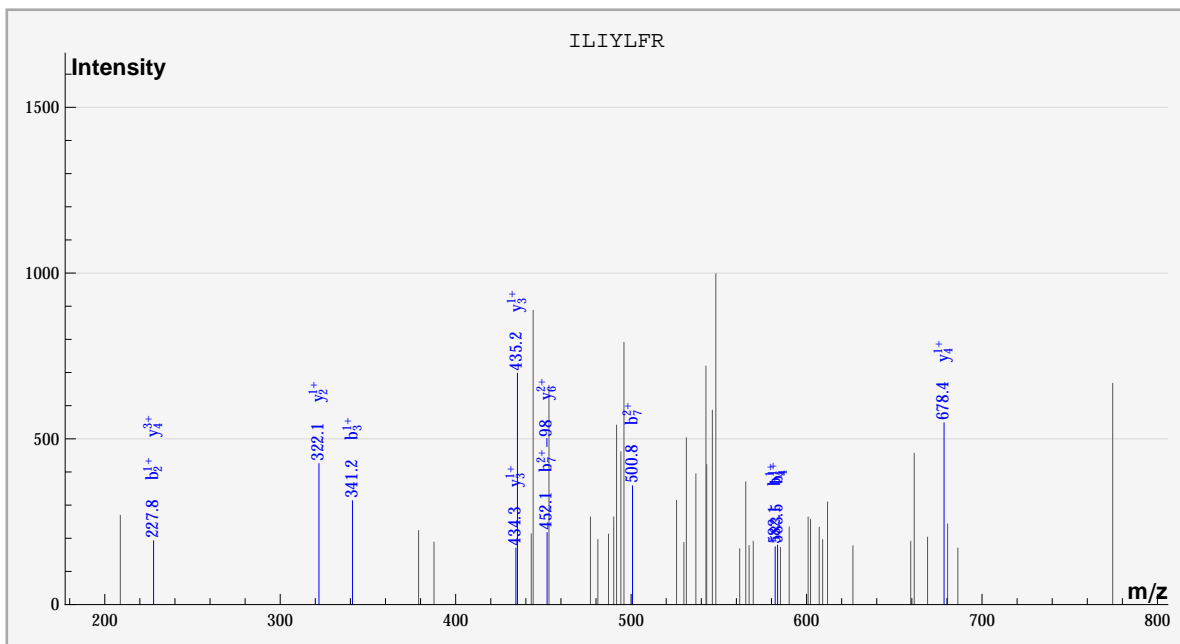

|   | # | b | b* | # | y | y* | P | P* |
|---|---|---|----|---|---|----|---|----|
| I | 1 |   |    |   |   |    |   |    |
| L | 2 | ✓ |    | 6 | ✓ |    |   |    |
| I | 3 | ✓ |    | 5 |   |    |   |    |
| Y | 4 | ✓ |    | 4 | ✓ |    |   |    |
| L | 5 |   |    | 3 | ✓ |    |   |    |
| F | 6 |   |    | 2 | ✓ |    |   |    |
| R | 7 | ✓ | ✓  | 1 |   |    |   |    |

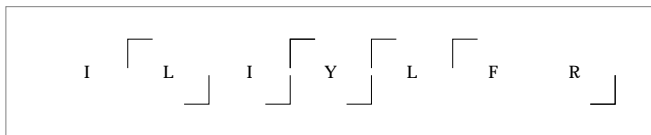

dbValid true ILIYLFR PHOS(1) 2. 509. 0.280262 5.67772 100. ? 3252.

S\_Acido\_new%gi|68568039|gb|AAY80968.1| ILIYLFR%::::PHOS::::%sample\_1%compd\_1714

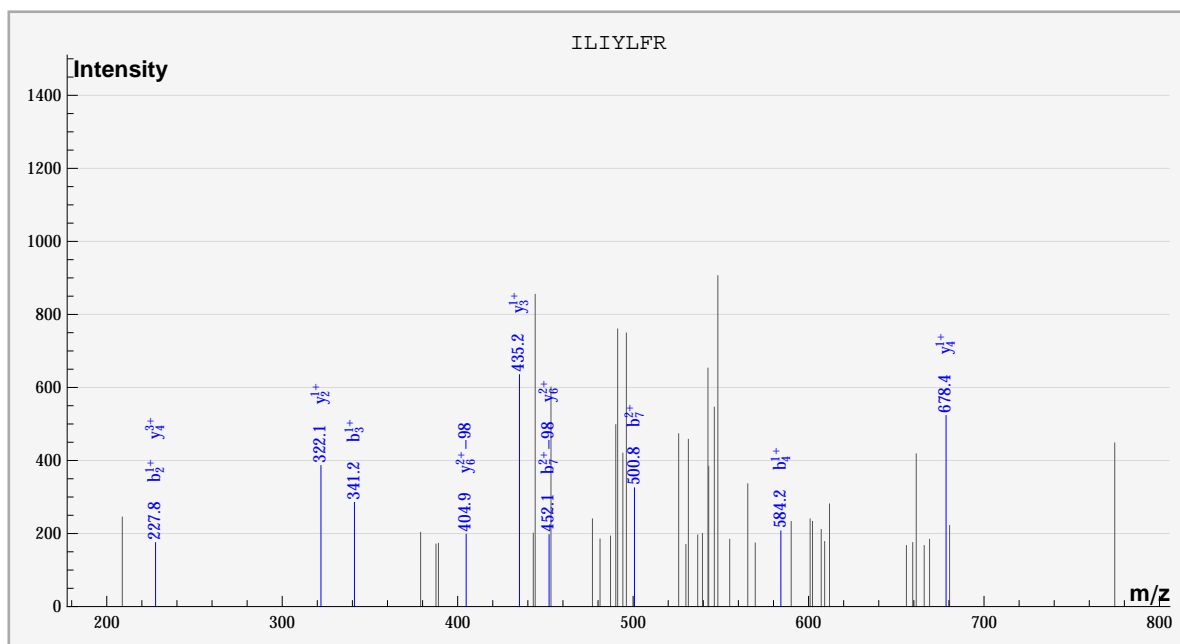

|   | # | b | b* | # | y | y* | P | P* |
|---|---|---|----|---|---|----|---|----|
| I | 1 |   |    |   |   |    |   |    |
| L | 2 | ✓ |    | 6 | ✓ | ✓  |   |    |
| I | 3 | ✓ |    | 5 |   |    |   |    |
| Y | 4 | ✓ |    | 4 | ✓ |    |   |    |
| L | 5 |   |    | 3 | ✓ |    |   |    |
| F | 6 |   |    | 2 | ✓ |    |   |    |
| R | 7 | ✓ | ✓  | 1 |   |    |   |    |

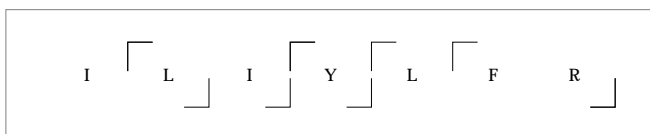

dbValid true ILIYLF R PHOS(1) 2. 509. 0.280262 4.95809 100. ? 3264.

S\_Acido\_new%gi|68568039|gb|AAY80968.1| ILIYLF R%::::PHOS::::%sample\_1%cmpd\_1725

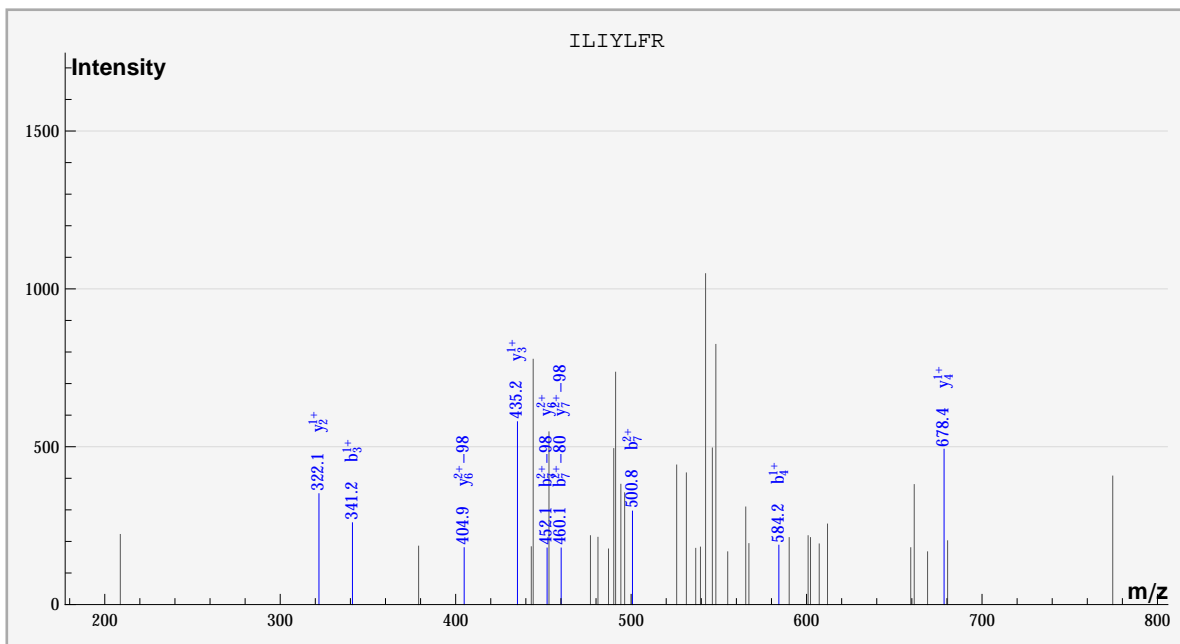

|   | # | b | b* | # | y | y* | P | P* |
|---|---|---|----|---|---|----|---|----|
| I | 1 |   |    |   |   |    |   | ✓  |
| L | 2 |   |    | 6 | ✓ | ✓  |   |    |
| I | 3 | ✓ |    | 5 |   |    |   |    |
| Y | 4 | ✓ |    | 4 | ✓ |    |   |    |
| L | 5 |   |    | 3 | ✓ |    |   |    |
| F | 6 |   |    | 2 | ✓ |    |   |    |
| R | 7 | ✓ | ✓  | 1 |   |    |   |    |

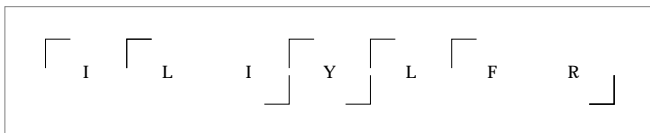

dbValid true DYSSVER PHOS(2) 2. 509. -0.837913 5.13411 100. ? 4548.  
 S\_Acido\_new%gi|68568716|gb|AA81645.1| DYSSVER%::PHOS:PHOS::::%sample\_1%compd\_2947

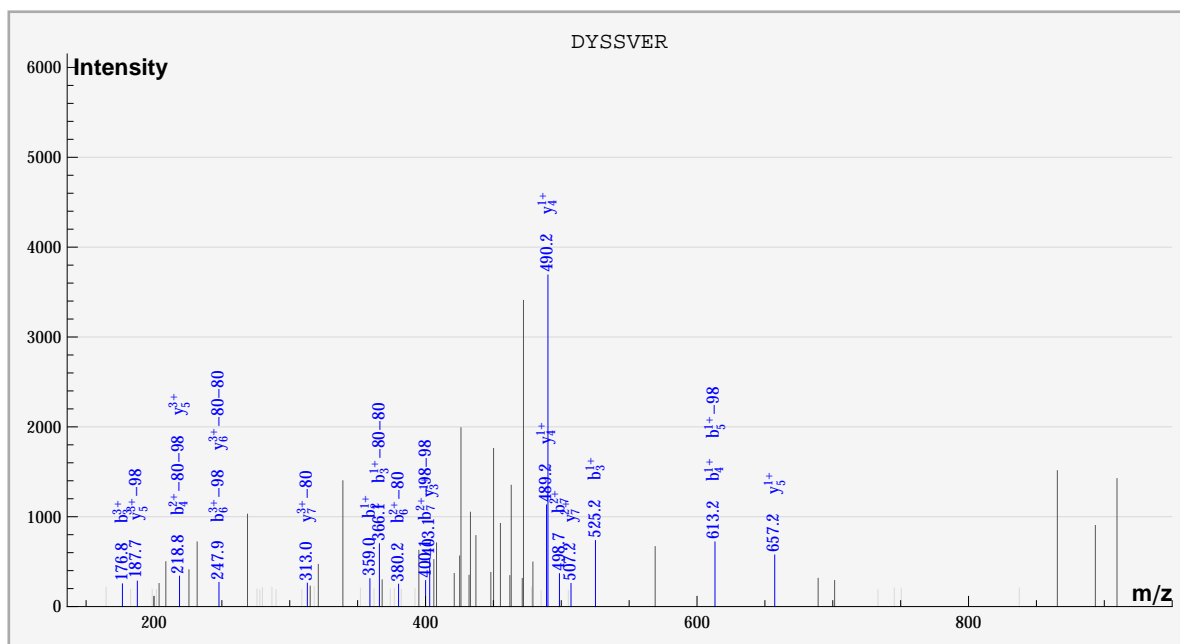

|   | # | b | b* | # | y | y* | P | P* |
|---|---|---|----|---|---|----|---|----|
| D | 1 |   |    |   |   |    | ✓ | ✓  |
| Y | 2 | ✓ |    | 6 |   | ✓  |   |    |
| S | 3 | ✓ | ✓  | 5 | ✓ | ✓  |   |    |
| S | 4 | ✓ | ✓  | 4 | ✓ |    |   |    |
| V | 5 |   | ✓  | 3 | ✓ |    |   |    |
| E | 6 |   | ✓  | 2 |   |    |   |    |
| R | 7 | ✓ | ✓  | 1 |   |    |   |    |

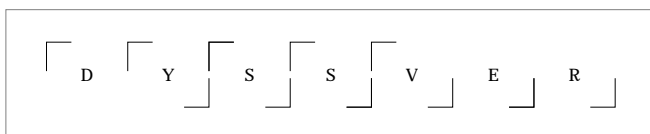

dbValid true DYSSVER PHOS(2) 2. 509. -0.837913 5.25731 100. ? 4560.  
 S\_Acido\_new%gi|68568716|gb|AAY81645.1| DYSSVER%::PHOS:PHOS::::%sample\_1%compd\_2958

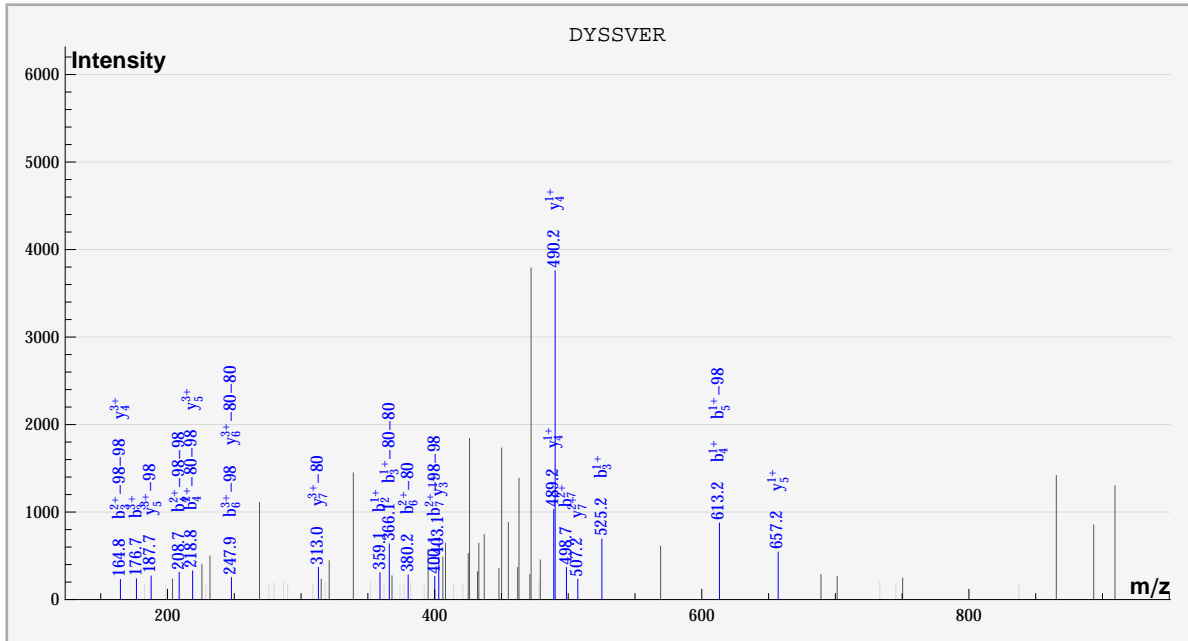

|   | # | b | b* | # | y | y* | P | P* |
|---|---|---|----|---|---|----|---|----|
| D | 1 |   |    |   |   |    | ✓ | ✓  |
| Y | 2 | ✓ |    | 6 |   | ✓  |   |    |
| S | 3 | ✓ | ✓  | 5 | ✓ | ✓  |   |    |
| S | 4 | ✓ | ✓  | 4 | ✓ |    |   |    |
| V | 5 |   | ✓  | 3 | ✓ |    |   |    |
| E | 6 |   | ✓  | 2 |   |    |   |    |
| R | 7 | ✓ | ✓  | 1 |   |    |   |    |

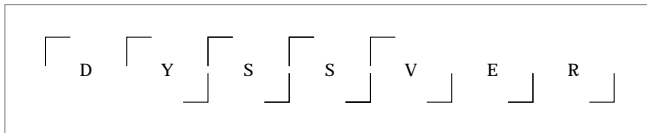

dbValid true DYSSVER PHOS(2) 2. 509. -0.837913 5.25819 100. ? 4572.  
 S\_Acido\_new%gii68568716|gb|AAY81645.1| DYSSVER:::PHOS:PHOS:::sample\_1%compd\_2969

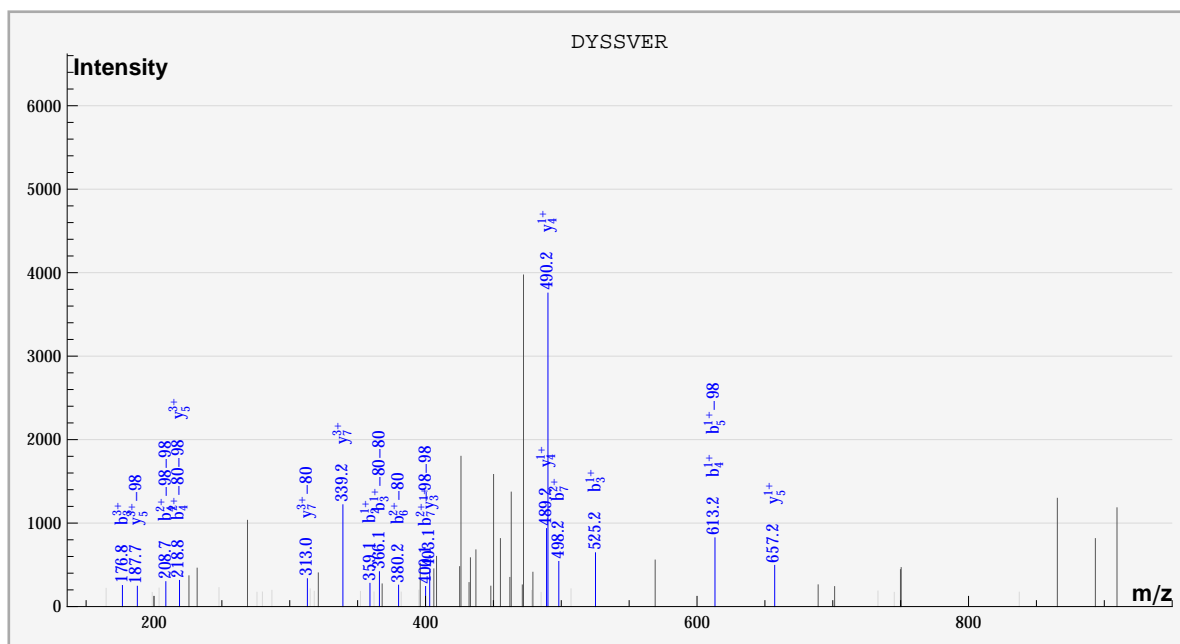

|   | # | b | b* | # | y | y* | P | P* |
|---|---|---|----|---|---|----|---|----|
| D | 1 |   |    |   |   |    | ✓ | ✓  |
| Y | 2 | ✓ |    | 6 |   |    |   |    |
| S | 3 | ✓ | ✓  | 5 | ✓ | ✓  |   |    |
| S | 4 | ✓ | ✓  | 4 | ✓ |    |   |    |
| V | 5 |   | ✓  | 3 | ✓ |    |   |    |
| E | 6 |   | ✓  | 2 |   |    |   |    |
| R | 7 | ✓ | ✓  | 1 |   |    |   |    |

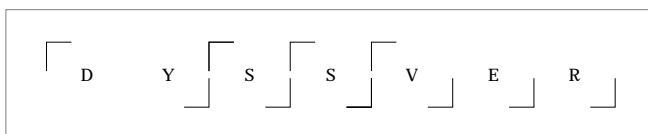



dbValid true DYSSVER PHOS(2) 2. 509. -0.837913 5.08352 100. ? 4584.

S\_Acido\_new%gii68568716|gb|AAy81645.1| DYSSVER%::PHOS:PHOS::::%sample\_1%compd\_2979

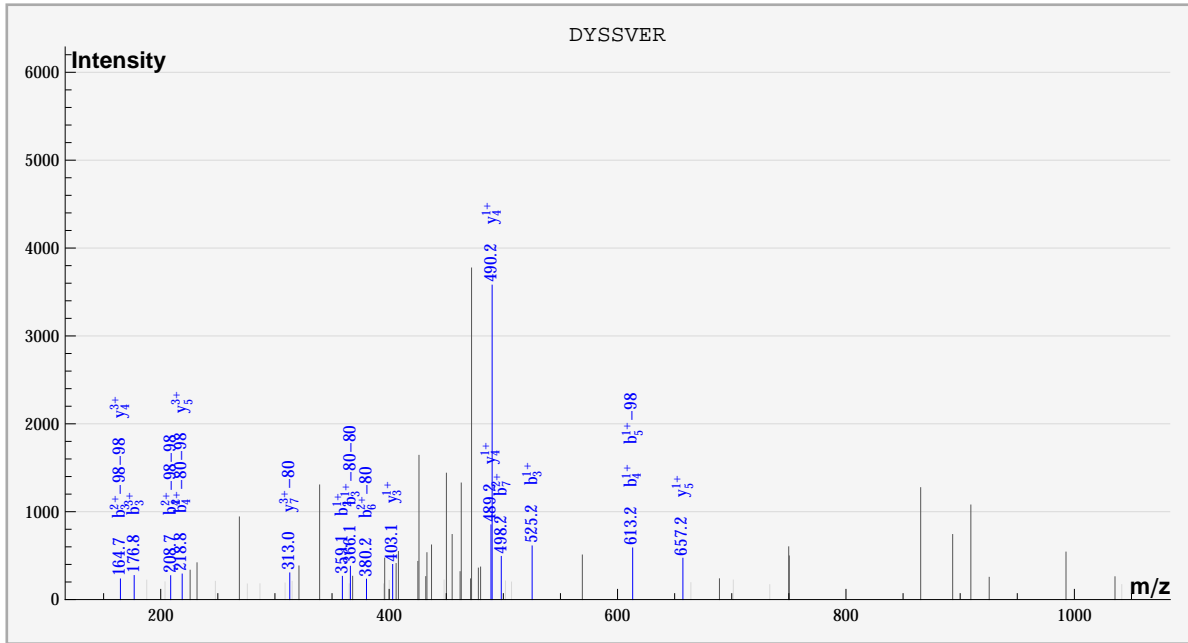

|   | # | b | b* | # | y | y* | P | P* |
|---|---|---|----|---|---|----|---|----|
| D | 1 |   |    |   |   |    |   | ✓  |
| Y | 2 | ✓ |    | 6 |   |    |   |    |
| S | 3 | ✓ | ✓  | 5 | ✓ |    |   |    |
| S | 4 | ✓ | ✓  | 4 | ✓ |    |   |    |
| V | 5 |   | ✓  | 3 | ✓ |    |   |    |
| E | 6 |   | ✓  | 2 |   |    |   |    |
| R | 7 | ✓ |    | 1 |   |    |   |    |

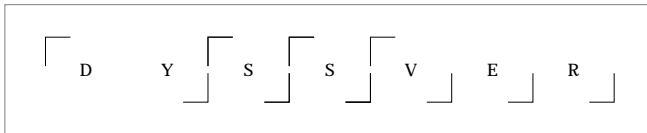

dbValid true TMIVTKLK PHOS(1) 2. 509. -1.72313 4.89457 100. ? 4608.  
 S\_Acido\_new%gi|68567991|gb|AAY80920.1| TMIVTKLK%:PHOS:::sample\_1%compd\_3001

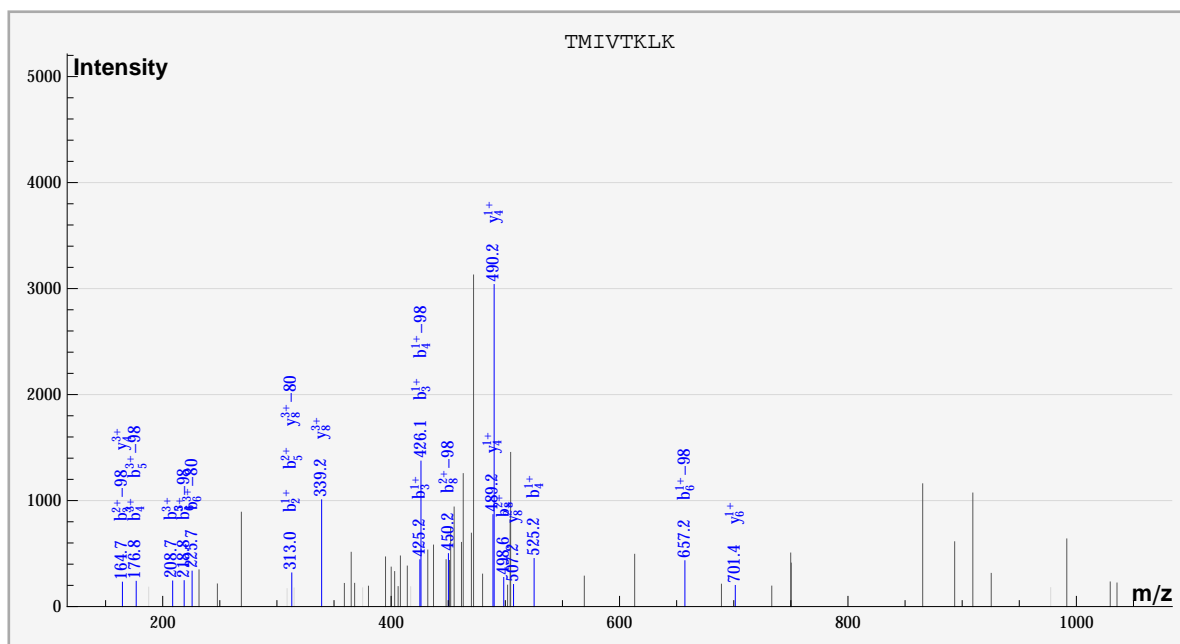

|   | # | b | b* | # | y | y* | P | P* |
|---|---|---|----|---|---|----|---|----|
| T | 1 |   |    |   |   |    | ✓ | ✓  |
| M | 2 | ✓ |    | 7 |   |    |   |    |
| I | 3 | ✓ | ✓  | 6 | ✓ |    |   |    |
| V | 4 | ✓ | ✓  | 5 |   |    |   |    |
| T | 5 | ✓ | ✓  | 4 | ✓ |    |   |    |
| K | 6 |   | ✓  | 3 |   |    |   |    |
| L | 7 |   |    | 2 |   |    |   |    |
| K | 8 | ✓ | ✓  | 1 |   |    |   |    |

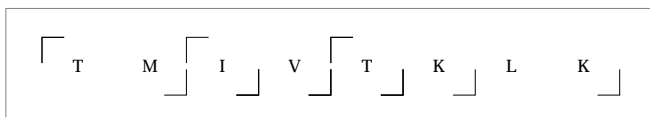

dbValid true DYSSVER PHOS(2) 2. 509. -0.837913 5.12195 100. ? 4620.

S\_Acido\_new%gii68568716|gb|AAy81645.1| DYSSVER%::PHOS:PHOS::::%sample\_1%compd\_3011

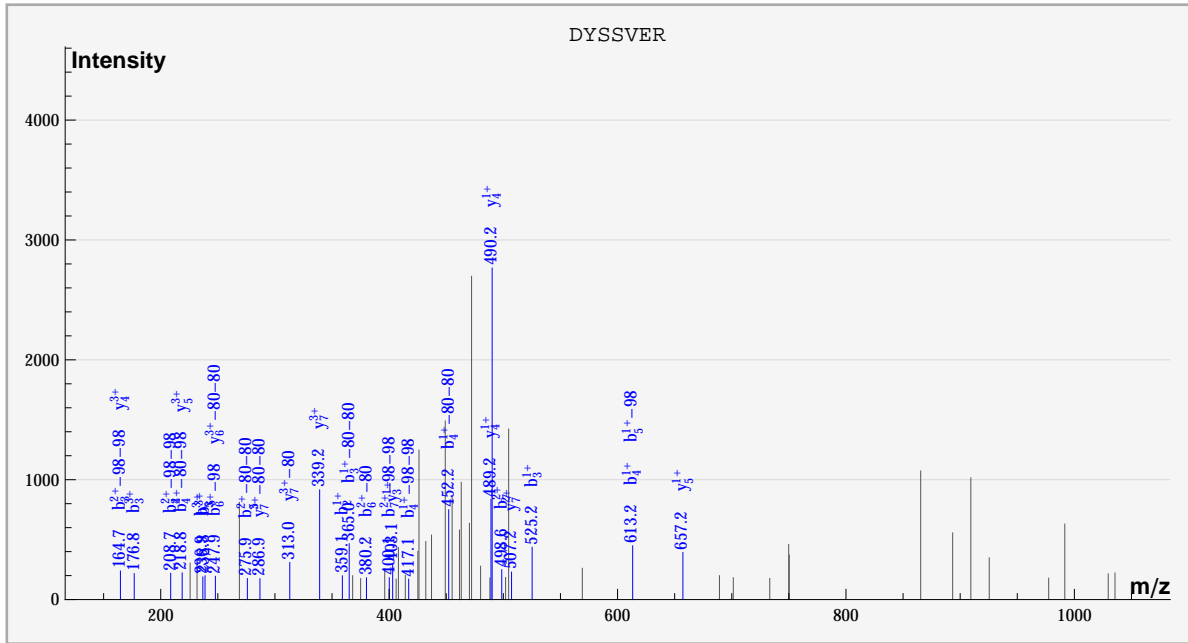

|   | # | b | b* | # | y | y* | P | P* |
|---|---|---|----|---|---|----|---|----|
| D | 1 |   |    |   |   |    | ✓ | ✓  |
| Y | 2 | ✓ |    | 6 |   | ✓  |   |    |
| S | 3 | ✓ | ✓  | 5 | ✓ |    |   |    |
| S | 4 | ✓ | ✓  | 4 | ✓ |    |   |    |
| V | 5 | ✓ | ✓  | 3 | ✓ |    |   |    |
| E | 6 |   | ✓  | 2 |   |    |   |    |
| R | 7 | ✓ | ✓  | 1 |   |    |   |    |

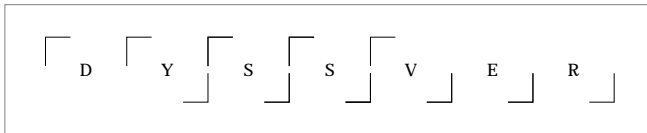

dbValid true DYSSVER PHOS(2) 2. 509. -0.837913 5.1593 100. ? 4626.  
 S\_Acido\_new%gii68568716|gb|AAy81645.1| DYSSVER%::PHOS:PHOS::::%sample\_1%compd\_3022

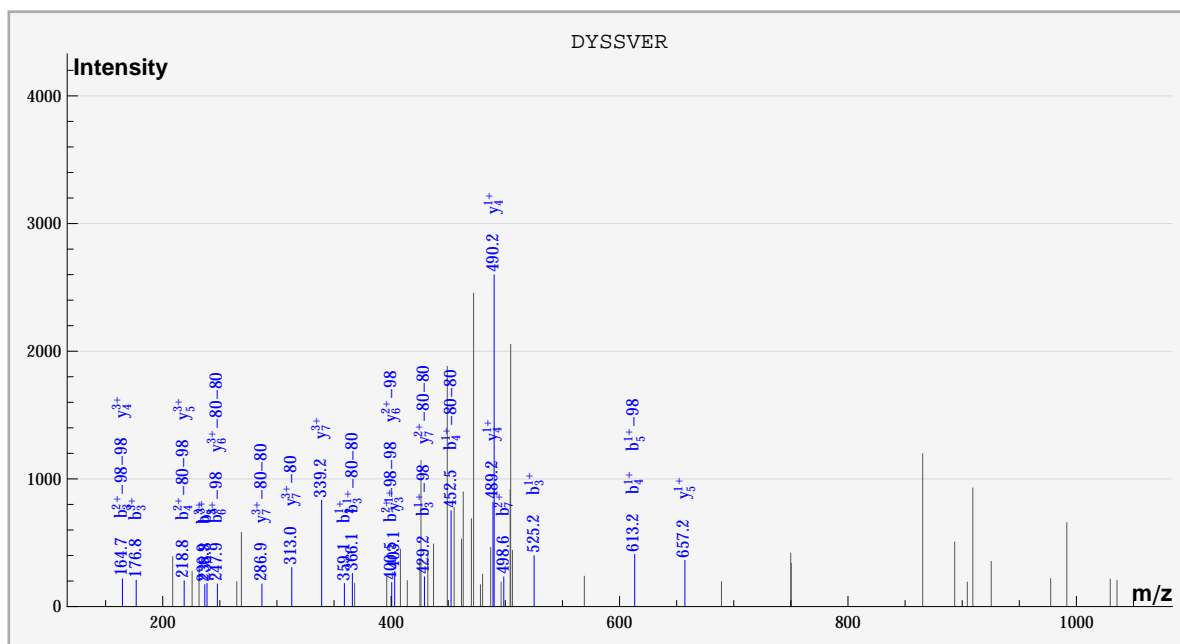

|   | # | b | b* | # | y | y* | P | P* |
|---|---|---|----|---|---|----|---|----|
| D | 1 |   |    |   |   |    | ✓ | ✓  |
| Y | 2 | ✓ |    | 6 |   | ✓  |   |    |
| S | 3 | ✓ | ✓  | 5 | ✓ |    |   |    |
| S | 4 | ✓ | ✓  | 4 | ✓ |    |   |    |
| V | 5 | ✓ | ✓  | 3 | ✓ |    |   |    |
| E | 6 |   | ✓  | 2 |   |    |   |    |
| R | 7 | ✓ | ✓  | 1 |   |    |   |    |

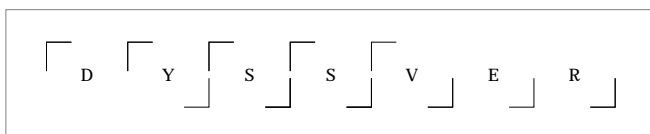

dbValid true ITTAITR PHOS(3) 2. 510. -1.81329 4.89653 100. ? 2748.

S\_Acido\_new%gi|68566904|gb|AAY79833.1| ITTAITR%::PHOS:PHOS::PHOS::%sample\_0%compd\_1392

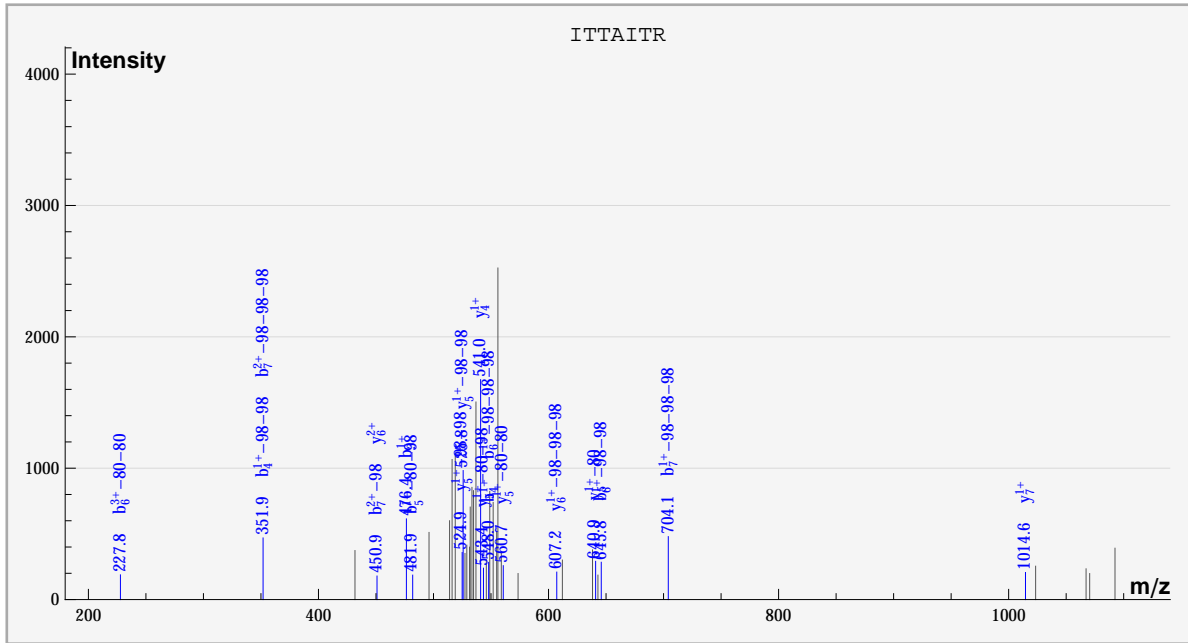

|   | # | b | b* | # | y | y* | P | P* |
|---|---|---|----|---|---|----|---|----|
| I | 1 |   |    |   |   |    | ✓ |    |
| T | 2 |   |    | 6 | ✓ | ✓  |   |    |
| T | 3 | ✓ |    | 5 |   | ✓  |   |    |
| A | 4 | ✓ | ✓  | 4 | ✓ |    |   |    |
| I | 5 |   | ✓  | 3 |   |    |   |    |
| T | 6 |   | ✓  | 2 |   |    |   |    |
| R | 7 |   | ✓  | 1 |   |    |   |    |

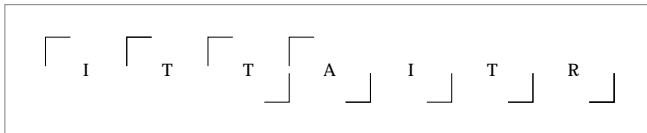

dbValid true FRNALYR PHOS(1) 2. 511. -0.755253 5.77887 100. ? 1794.

S\_Acido\_new%gi|68567555|gb|AAY80484.1| FRNALYR%:::PHOS::%sample\_2%cmpd\_504

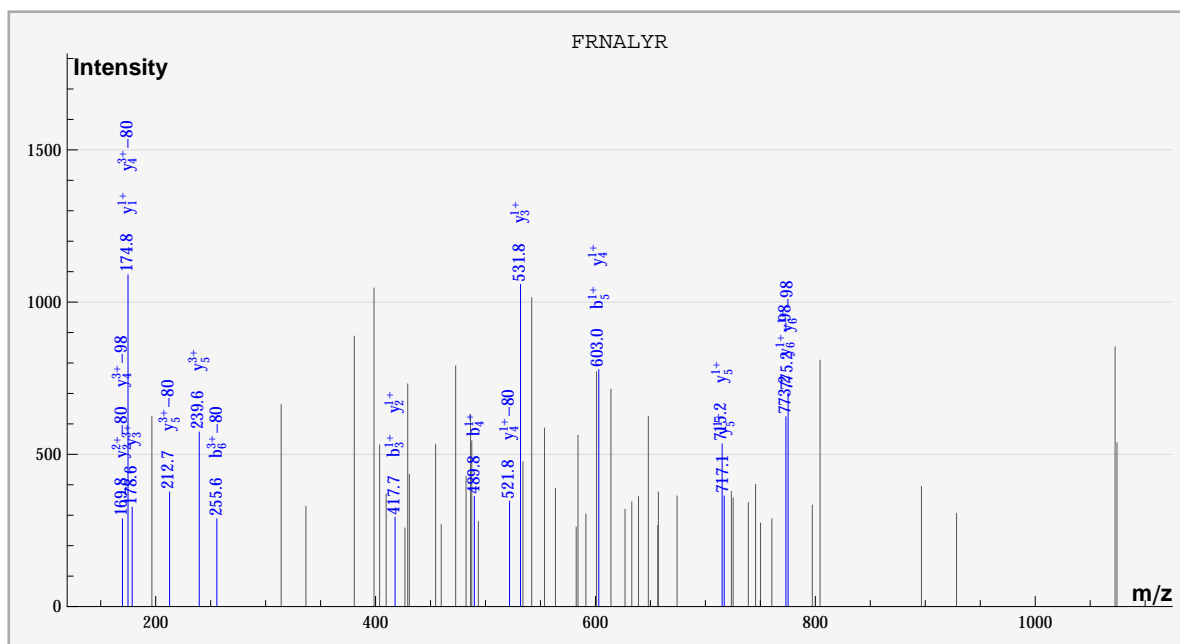

|   | # | b | b* | # | y | y* | P | P* |
|---|---|---|----|---|---|----|---|----|
| F | 1 |   |    |   |   |    |   |    |
| R | 2 |   |    | 6 |   | ✓  |   |    |
| N | 3 | ✓ |    | 5 | ✓ | ✓  |   |    |
| A | 4 | ✓ |    | 4 | ✓ | ✓  |   |    |
| L | 5 | ✓ |    | 3 | ✓ |    |   |    |
| Y | 6 |   | ✓  | 2 | ✓ | ✓  |   |    |
| R | 7 |   |    | 1 | ✓ |    |   |    |

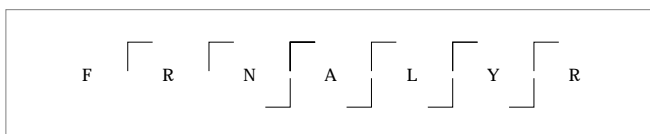

dbValid true VMYAMSR PHOS(2) 2. 511. -1.82965 5.42015 100. ? 2034.  
 S\_Acido\_new%gij68568538|gb|AAY81467.1| VMYAMSR%::PHOS::PHOS::%sample\_2%cmpd\_715

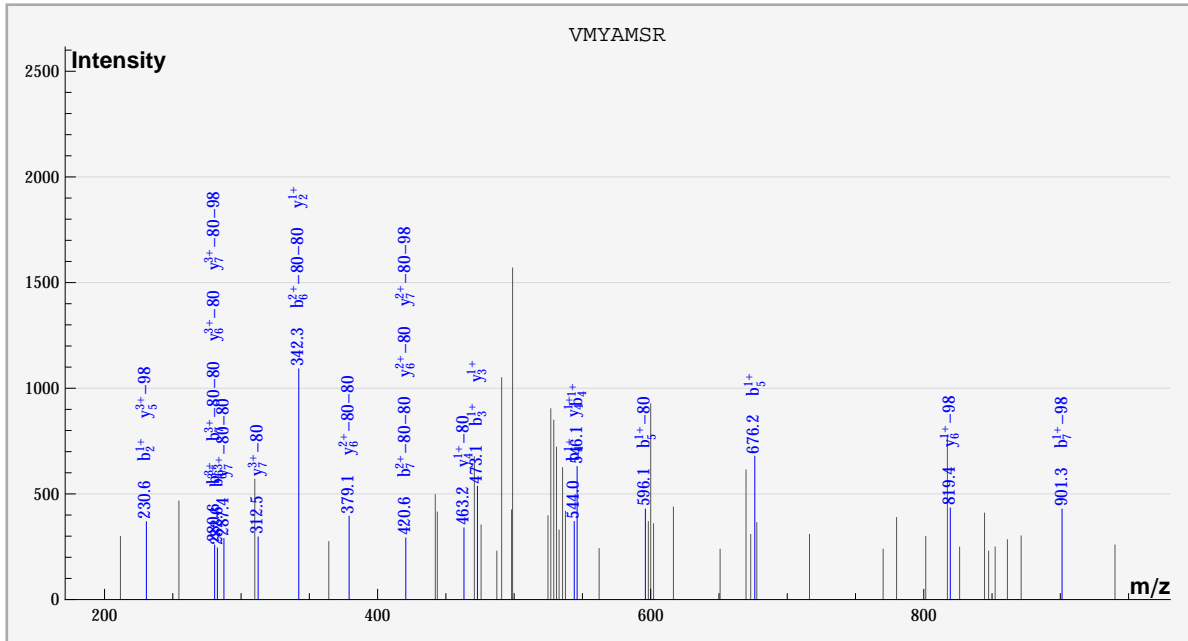

|   | # | b | b* | # | y | y* | P | P* |
|---|---|---|----|---|---|----|---|----|
| V | 1 |   |    |   |   |    |   | ✓  |
| M | 2 | ✓ |    | 6 |   | ✓  |   |    |
| Y | 3 | ✓ |    | 5 |   | ✓  |   |    |
| A | 4 | ✓ |    | 4 | ✓ | ✓  |   |    |
| M | 5 | ✓ | ✓  | 3 | ✓ |    |   |    |
| S | 6 | ✓ | ✓  | 2 | ✓ |    |   |    |
| R | 7 |   | ✓  | 1 |   |    |   |    |

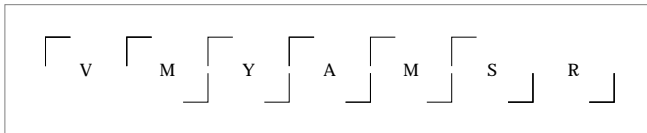

dbValid true EYIYPKK PHOS(1) 2. 511. -0.256288 5.68722 100. ? 2256.  
 S\_Acido\_new%gi|68567968|gb|AAY80897.1| EYIYPKK%::PHOS:::sample\_2%compd\_900

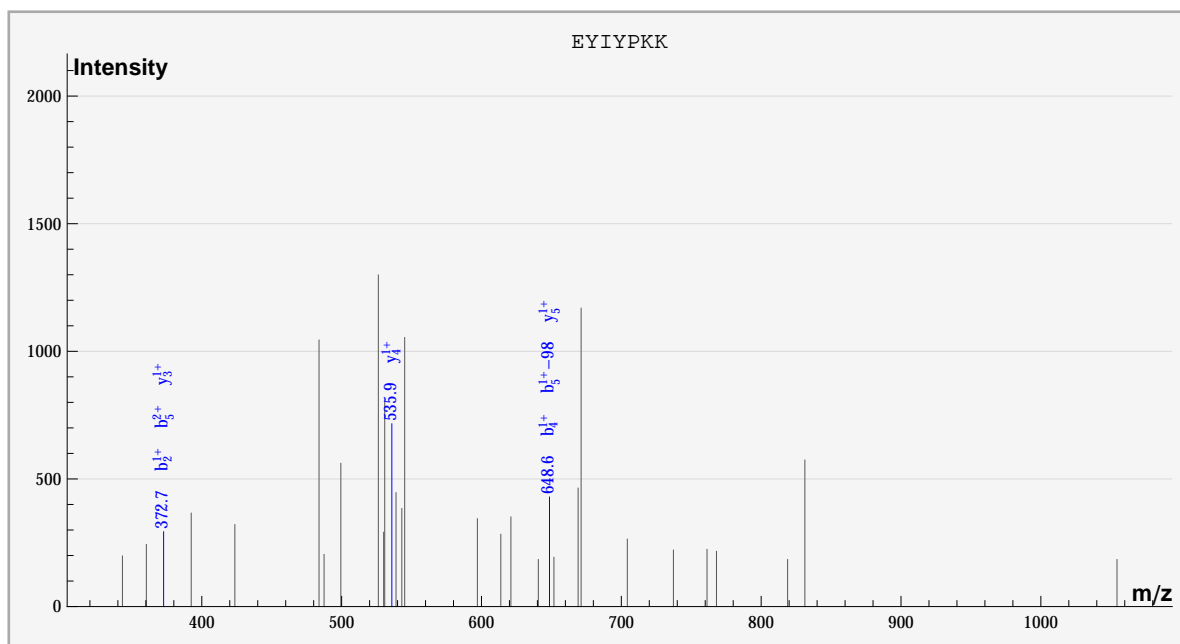

|   | # | b | b* | # | y | y* | P | P* |
|---|---|---|----|---|---|----|---|----|
| E | 1 |   |    |   |   |    |   |    |
| Y | 2 | ✓ |    | 6 |   |    |   |    |
| I | 3 |   |    | 5 | ✓ |    |   |    |
| Y | 4 | ✓ |    | 4 | ✓ |    |   |    |
| P | 5 | ✓ | ✓  | 3 | ✓ |    |   |    |
| K | 6 |   |    | 2 |   |    |   |    |
| K | 7 |   |    | 1 |   |    |   |    |

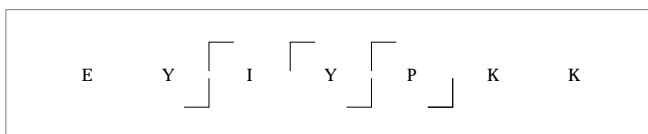



dbConflictWinner true ILIYLFR PHOS(1) 2. 511. -1.71974 6.05669 100. ?  
 3168. S\_Acido\_new%gi|68568039|gb|AAY80968.1| ILIYLFR%:::PHOS:::%sample\_1%compd\_1645

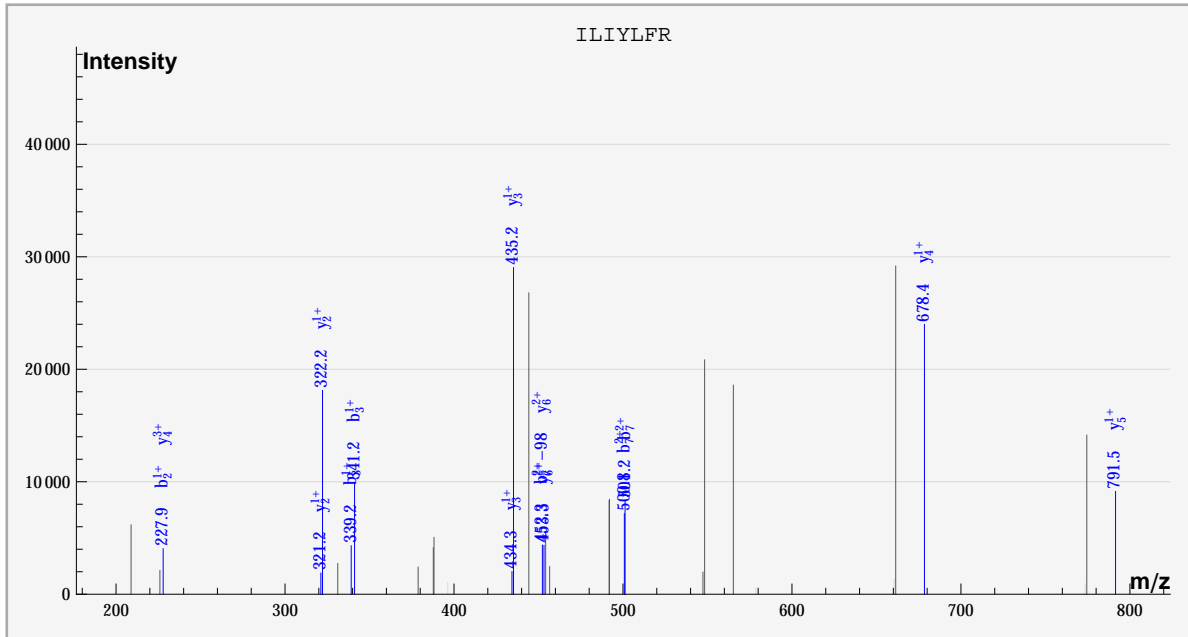

|   | # | b | b* | # | y | y* | P | P* |
|---|---|---|----|---|---|----|---|----|
| I | 1 |   |    |   |   |    |   |    |
| L | 2 | ✓ |    | 6 | ✓ |    |   |    |
| I | 3 | ✓ |    | 5 | ✓ |    |   |    |
| Y | 4 |   |    | 4 | ✓ |    |   |    |
| L | 5 |   |    | 3 | ✓ |    |   |    |
| F | 6 |   |    | 2 | ✓ |    |   |    |
| R | 7 | ✓ | ✓  | 1 |   |    |   |    |

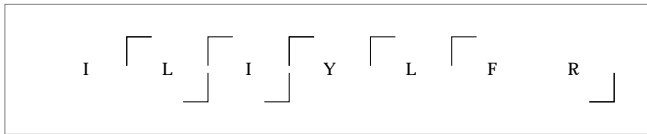

dbConflictWinner true ILIYLFR PHOS(1) 2. 511. -1.71974 6.20747 100. ?  
 3180. S\_Acido\_new%gi|68568039|gb|AAY80968.1| ILIYLFR%:::PHOS:::%sample\_1%compd\_1655

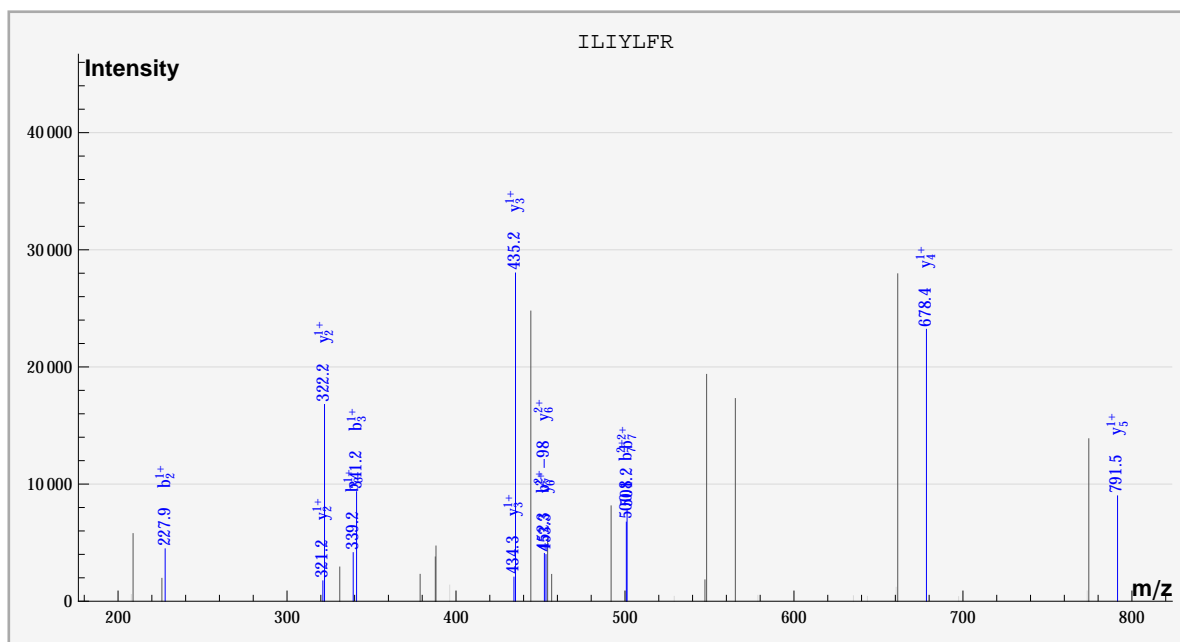

|   | # | b | b* | # | y | y* | P | P* |
|---|---|---|----|---|---|----|---|----|
| I | 1 |   |    |   |   |    |   |    |
| L | 2 | ✓ |    | 6 | ✓ |    |   |    |
| I | 3 | ✓ |    | 5 | ✓ |    |   |    |
| Y | 4 |   |    | 4 | ✓ |    |   |    |
| L | 5 |   |    | 3 | ✓ |    |   |    |
| F | 6 |   |    | 2 | ✓ |    |   |    |
| R | 7 | ✓ | ✓  | 1 |   |    |   |    |

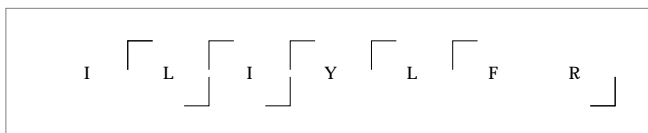

dbConflictWinner true ILIYLFR PHOS(1) 2. 511. -1.71974 5.73618 100. ?  
 3192. S\_Acido\_new%gi|68568039|gb|AAY80968.1| ILIYLFR%:::PHOS:::%sample\_1%compd\_1665

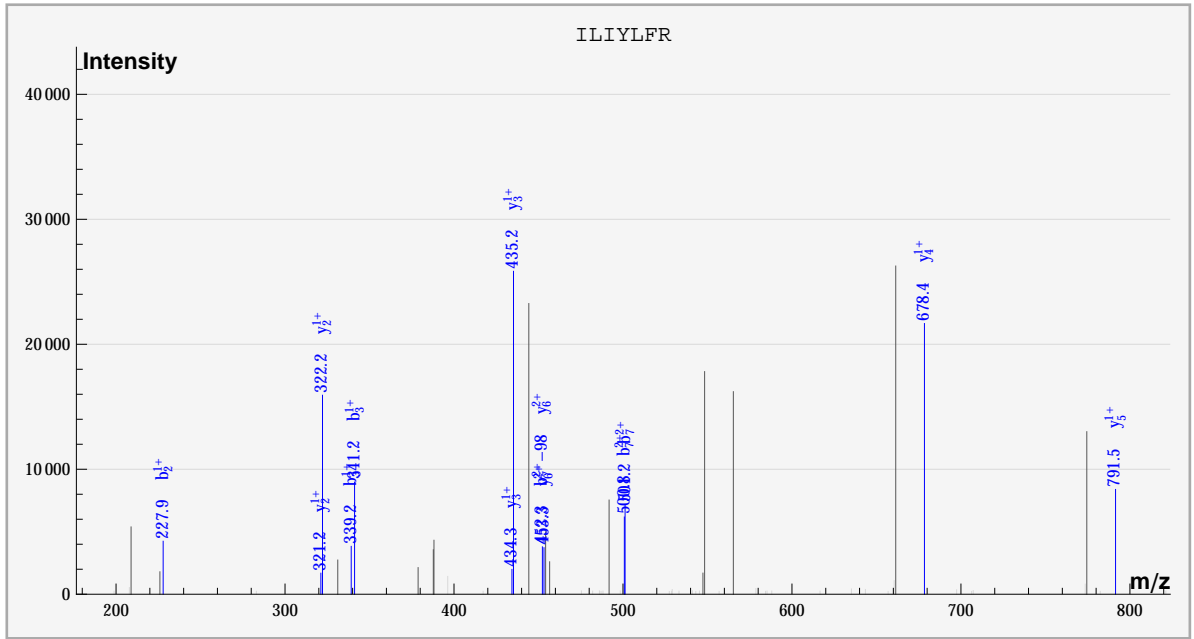

|   | # | b | b* | # | y | y* | P | P* |
|---|---|---|----|---|---|----|---|----|
| I | 1 |   |    |   |   |    |   |    |
| L | 2 | ✓ |    | 6 | ✓ |    |   |    |
| I | 3 | ✓ |    | 5 | ✓ |    |   |    |
| Y | 4 |   |    | 4 | ✓ |    |   |    |
| L | 5 |   |    | 3 | ✓ |    |   |    |
| F | 6 |   |    | 2 | ✓ |    |   |    |
| R | 7 | ✓ | ✓  | 1 |   |    |   |    |

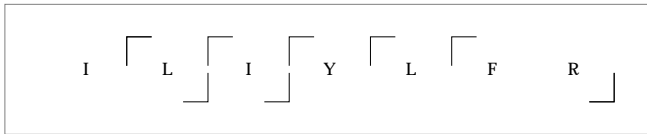

dbValid true ILIYLFR PHOS(1) 2. 511. -1.71974 5.70112 100. ? 3204.

S\_Acido\_new%gi|68568039|gb|AAY80968.1| ILIYLFR%::::PHOS::::%sample\_1%compd\_1675

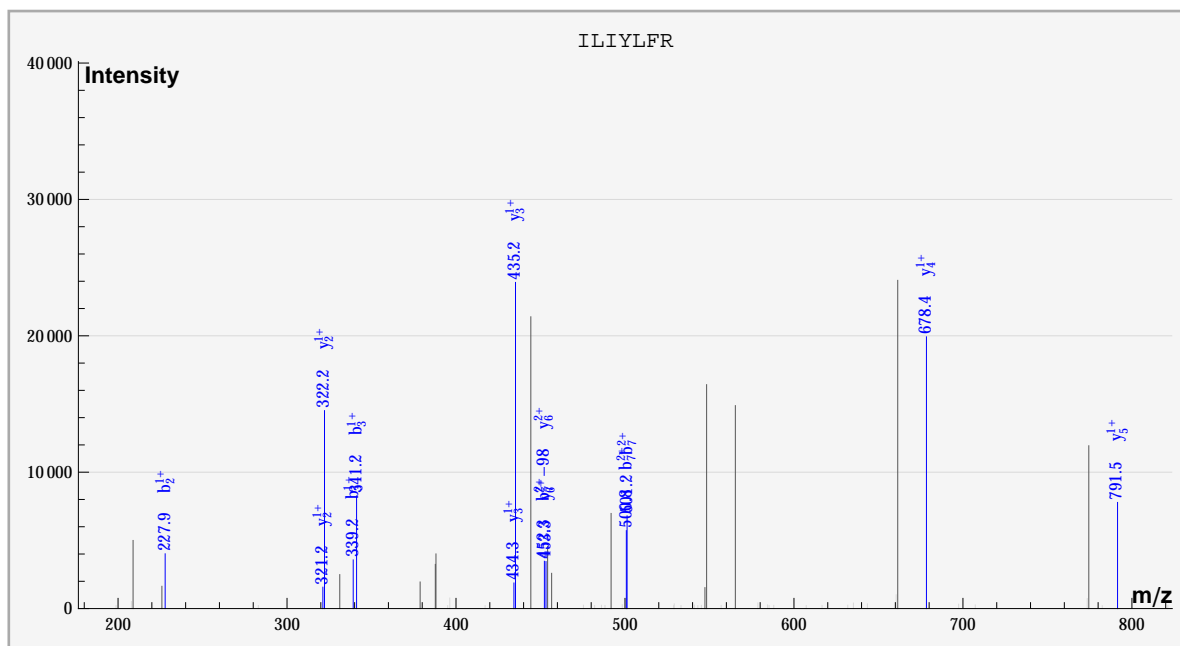

|   | # | b | b* | # | y | y* | P | P* |
|---|---|---|----|---|---|----|---|----|
| I | 1 |   |    |   |   |    |   |    |
| L | 2 | ✓ |    | 6 | ✓ |    |   |    |
| I | 3 | ✓ |    | 5 | ✓ |    |   |    |
| Y | 4 |   |    | 4 | ✓ |    |   |    |
| L | 5 |   |    | 3 | ✓ |    |   |    |
| F | 6 |   |    | 2 | ✓ |    |   |    |
| R | 7 | ✓ | ✓  | 1 |   |    |   |    |

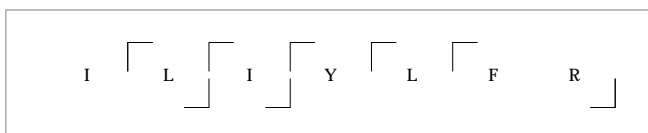

dbConflictWinner true ILIYLFR PHOS(1) 2. 511. -1.71974 5.70302 100. ?  
 3216. S\_Acido\_new%gi|68568039|gb|AAY80968.1| ILIYLFR%:::PHOS:::%sample\_1%compd\_1685

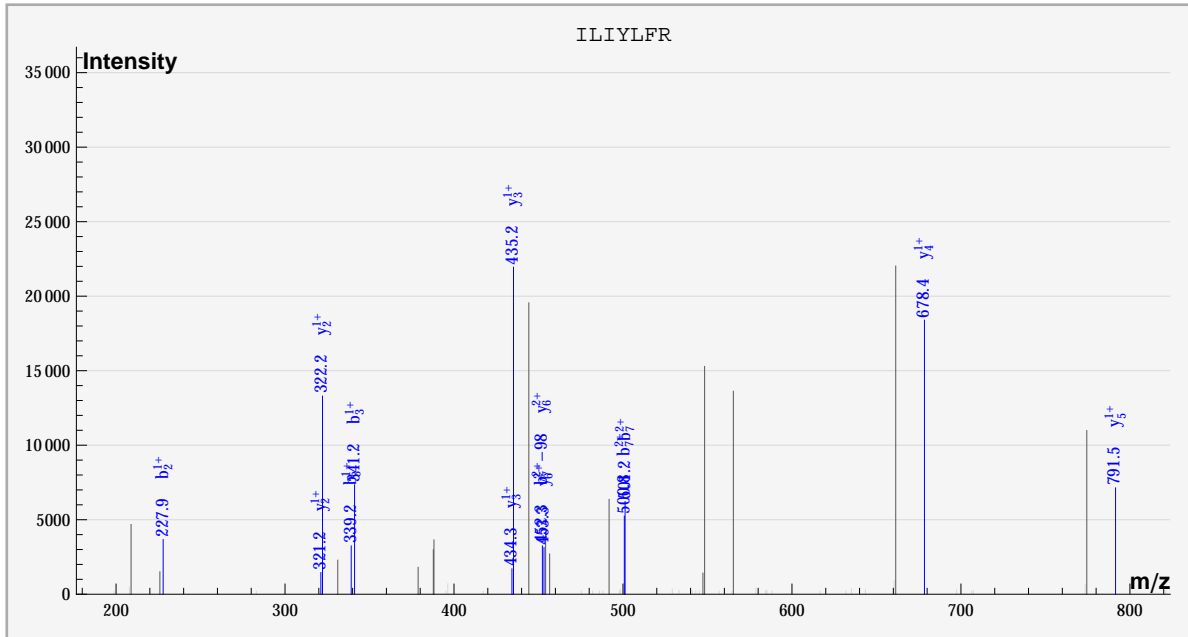

|   | # | b | b* | # | y | y* | P | P* |
|---|---|---|----|---|---|----|---|----|
| I | 1 |   |    |   |   |    |   |    |
| L | 2 | ✓ |    | 6 | ✓ |    |   |    |
| I | 3 | ✓ |    | 5 | ✓ |    |   |    |
| Y | 4 |   |    | 4 | ✓ |    |   |    |
| L | 5 |   |    | 3 | ✓ |    |   |    |
| F | 6 |   |    | 2 | ✓ |    |   |    |
| R | 7 | ✓ | ✓  | 1 |   |    |   |    |



dbConflictWinner true ILIYLFR PHOS(1) 2. 511. -1.71974 5.7635 100. ?  
 3240. S\_Acido\_new%gi|68568039|gb|AAY80968.1| ILIYLFR%:::PHOS:::%sample\_1%compd\_1705

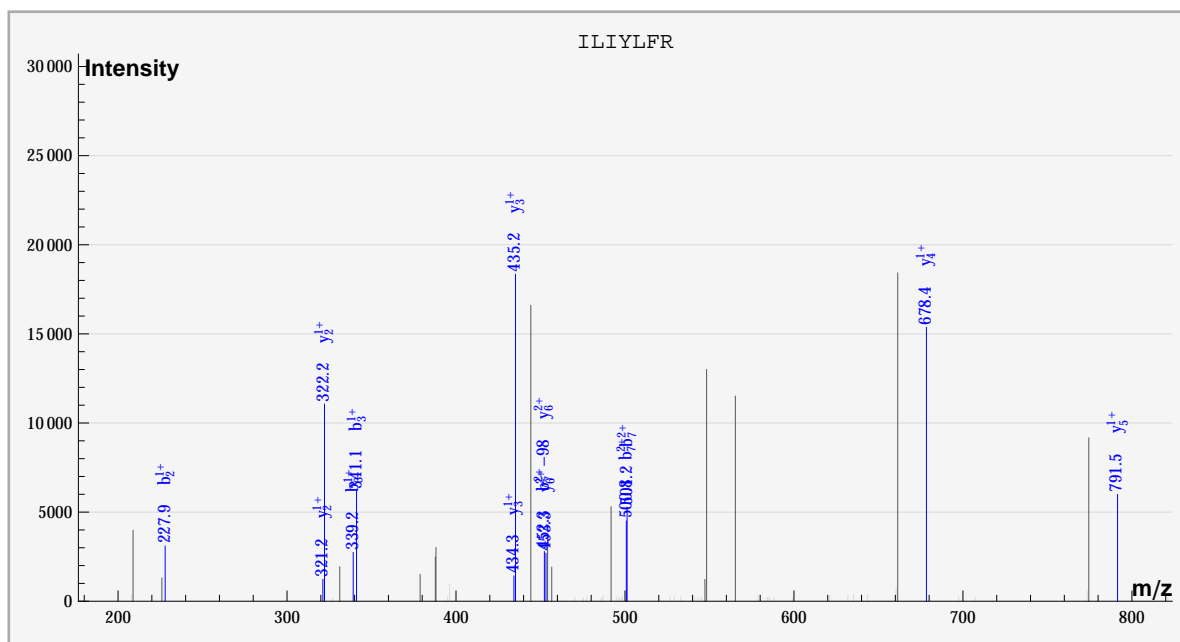

|   | # | b | b* | # | y | y* | P | P* |
|---|---|---|----|---|---|----|---|----|
| I | 1 |   |    |   |   |    |   |    |
| L | 2 | ✓ |    | 6 | ✓ |    |   |    |
| I | 3 | ✓ |    | 5 | ✓ |    |   |    |
| Y | 4 |   |    | 4 | ✓ |    |   |    |
| L | 5 |   |    | 3 | ✓ |    |   |    |
| F | 6 |   |    | 2 | ✓ |    |   |    |
| R | 7 | ✓ | ✓  | 1 |   |    |   |    |



dbConflictWinner true ILIYLF R PHOS(1) 2. 511. -1.71974 5.59035 100. ?  
 3252. S\_Acido\_new%gi|68568039|gb|AAY80968.1| ILIYLF R:::PHOS:::sample\_1%compd\_1715

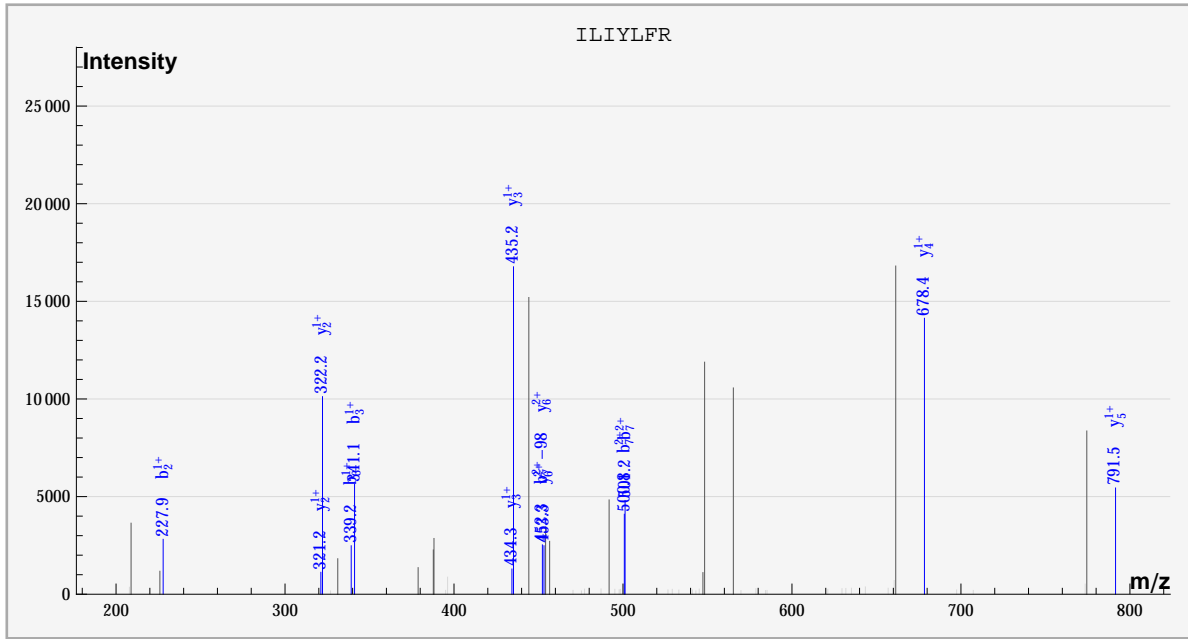

|   | # | b | b* | # | y | y* | P | P* |
|---|---|---|----|---|---|----|---|----|
| I | 1 |   |    |   |   |    |   |    |
| L | 2 | ✓ |    | 6 | ✓ |    |   |    |
| I | 3 | ✓ |    | 5 | ✓ |    |   |    |
| Y | 4 |   |    | 4 | ✓ |    |   |    |
| L | 5 |   |    | 3 | ✓ |    |   |    |
| F | 6 |   |    | 2 | ✓ |    |   |    |
| R | 7 | ✓ | ✓  | 1 |   |    |   |    |



dbConflictWinner true ILIYLF R PHOS(1) 2. 511. -1.71974 5.85325 100. ?  
 3276. S\_Acido\_new%gi|68568039|gb|AAY80968.1| ILIYLF R:::PHOS:::sample\_1%compd\_1736

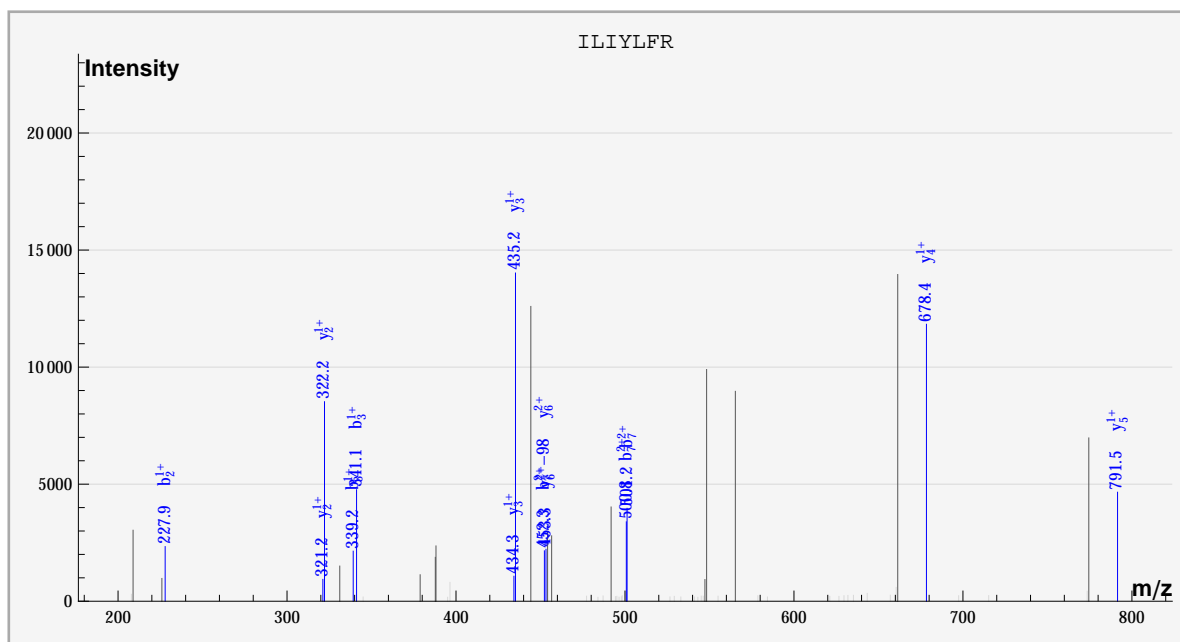

|   | # | b | b* | # | y | y* | P | P* |
|---|---|---|----|---|---|----|---|----|
| I | 1 |   |    |   |   |    |   |    |
| L | 2 | ✓ |    | 6 | ✓ |    |   |    |
| I | 3 | ✓ |    | 5 | ✓ |    |   |    |
| Y | 4 |   |    | 4 | ✓ |    |   |    |
| L | 5 |   |    | 3 | ✓ |    |   |    |
| F | 6 |   |    | 2 | ✓ |    |   |    |
| R | 7 | ✓ | ✓  | 1 |   |    |   |    |





dbConflictWinner true ILIYLFR PHOS(1) 2. 511. -1.71974 5.8952 100. ?  
 3288. S\_Acido\_new%gi|68568039|gb|AAY80968.1| ILIYLFR%:::PHOS:::%sample\_1%compd\_1747

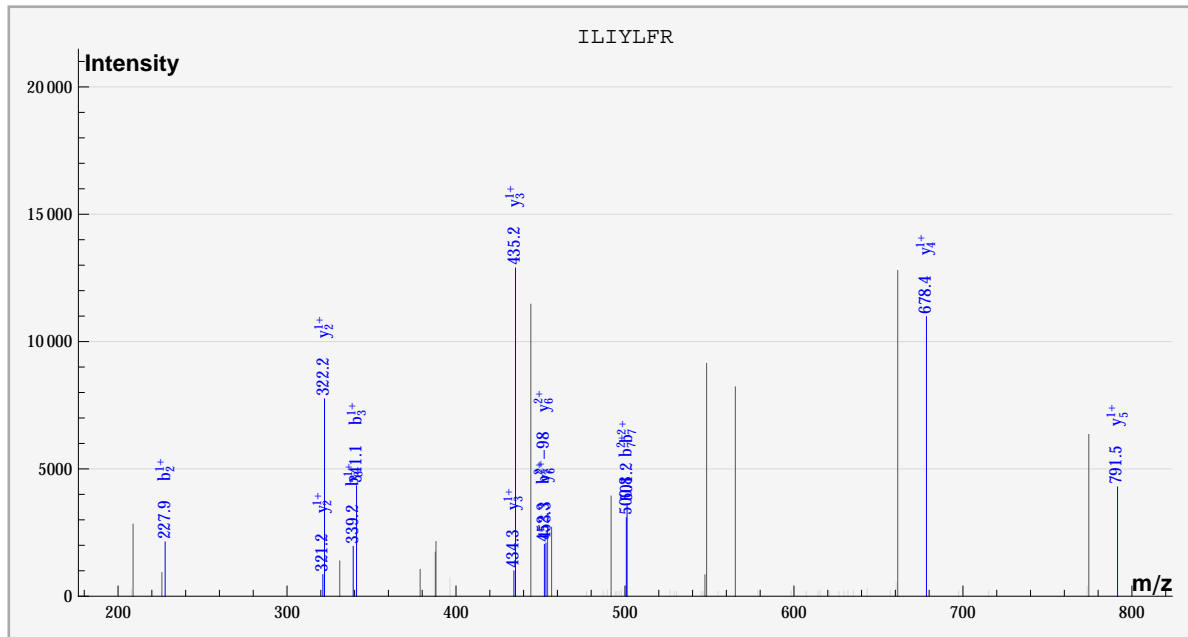

|   | # | b | b* | # | y | y* | P | P* |
|---|---|---|----|---|---|----|---|----|
| I | 1 |   |    |   |   |    |   |    |
| L | 2 | ✓ |    | 6 | ✓ |    |   |    |
| I | 3 | ✓ |    | 5 | ✓ |    |   |    |
| Y | 4 |   |    | 4 | ✓ |    |   |    |
| L | 5 |   |    | 3 | ✓ |    |   |    |
| F | 6 |   |    | 2 | ✓ |    |   |    |
| R | 7 | ✓ | ✓  | 1 |   |    |   |    |

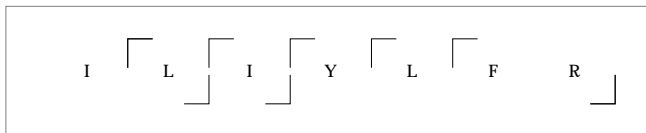

dbConflictWinner true ILIYLFR PHOS(1) 2. 511. -1.71974 5.98272 100. ?  
 3300. S\_Acido\_new%gi|68568039|gb|AAY80968.1| ILIYLFR%:::PHOS:::%sample\_1%compd\_1757

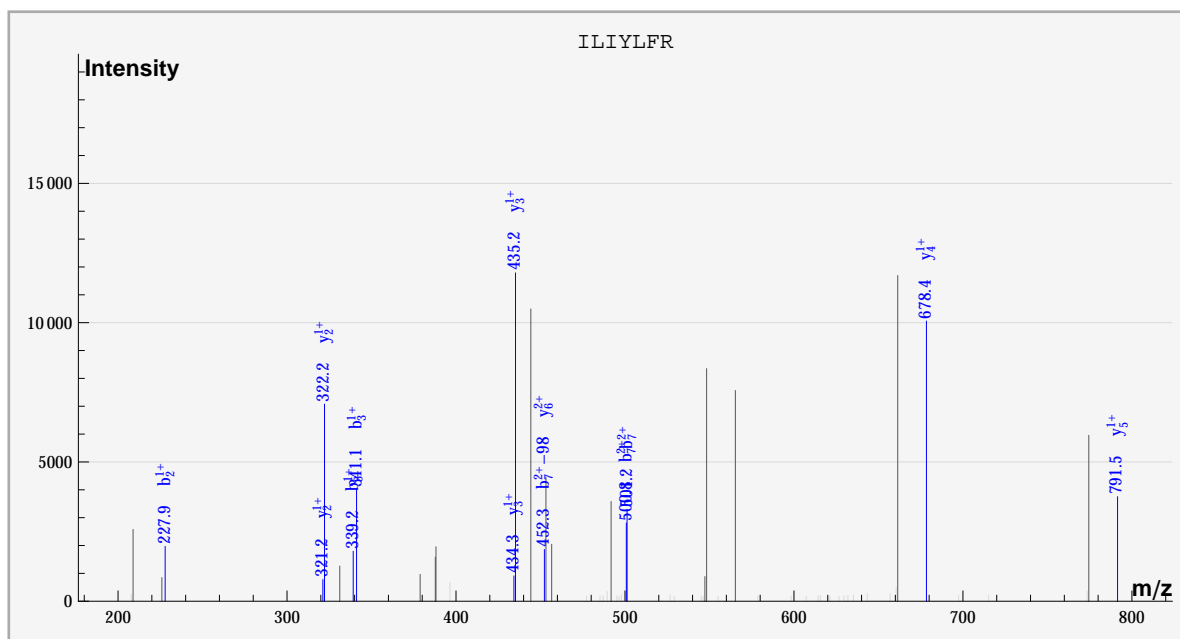

|   | # | b | b* | # | y | y* | P | P* |
|---|---|---|----|---|---|----|---|----|
| I | 1 |   |    |   |   |    |   |    |
| L | 2 | ✓ |    | 6 | ✓ |    |   |    |
| I | 3 | ✓ |    | 5 | ✓ |    |   |    |
| Y | 4 |   |    | 4 | ✓ |    |   |    |
| L | 5 |   |    | 3 | ✓ |    |   |    |
| F | 6 |   |    | 2 | ✓ |    |   |    |
| R | 7 | ✓ | ✓  | 1 |   |    |   |    |

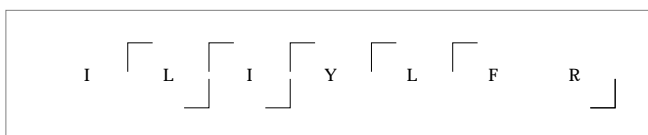

dbValid true ILIYLFR PHOS(1) 2. 511. -1.71974 5.882 100. ? 3312.

S\_Acido\_new%gi|68568039|gb|AAY80968.1| ILIYLFR%::::PHOS::::%sample\_1%cmpd\_1767

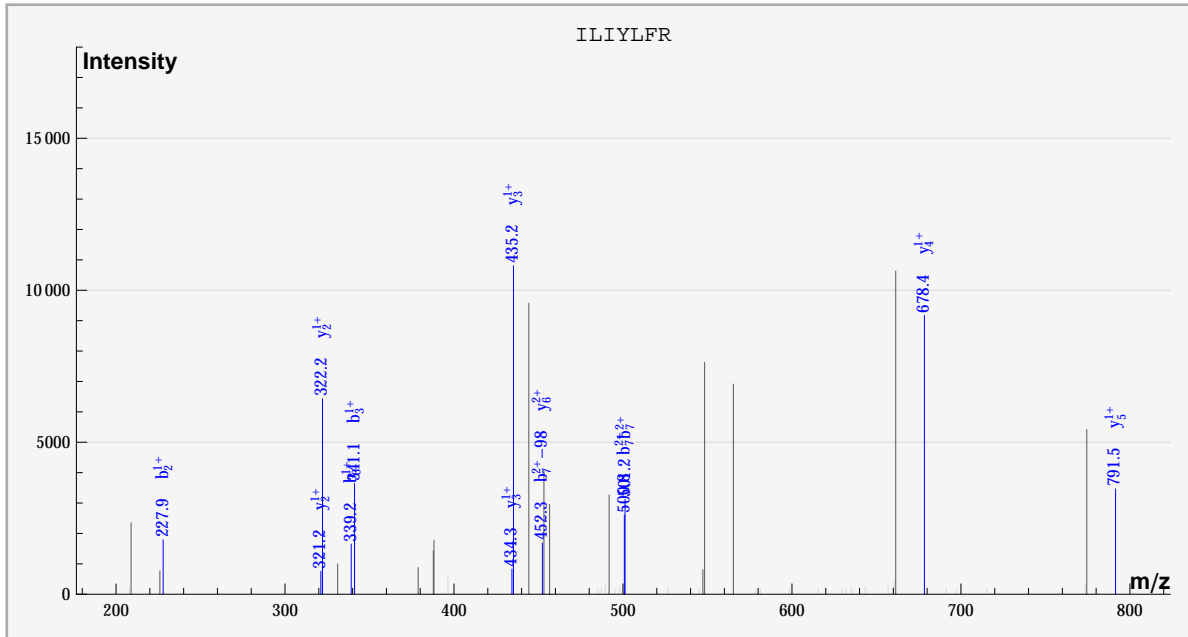

|   | # | b | b* | # | y | y* | P | P* |
|---|---|---|----|---|---|----|---|----|
| I | 1 |   |    |   |   |    |   |    |
| L | 2 | ✓ |    | 6 | ✓ |    |   |    |
| I | 3 | ✓ |    | 5 | ✓ |    |   |    |
| Y | 4 |   |    | 4 | ✓ |    |   |    |
| L | 5 |   |    | 3 | ✓ |    |   |    |
| F | 6 |   |    | 2 | ✓ |    |   |    |
| R | 7 | ✓ | ✓  | 1 |   |    |   |    |

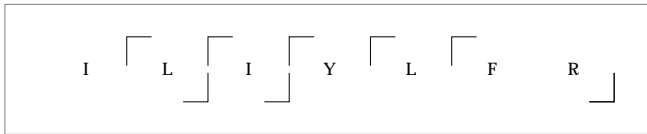

dbConflictWinner true ILIYLFR PHOS(1) 2. 511. -1.71974 5.8168 100. ?  
 3324. S\_Acido\_new%gi|68568039|gb|AAY80968.1| ILIYLFR%:::PHOS:::%sample\_1%compd\_1777

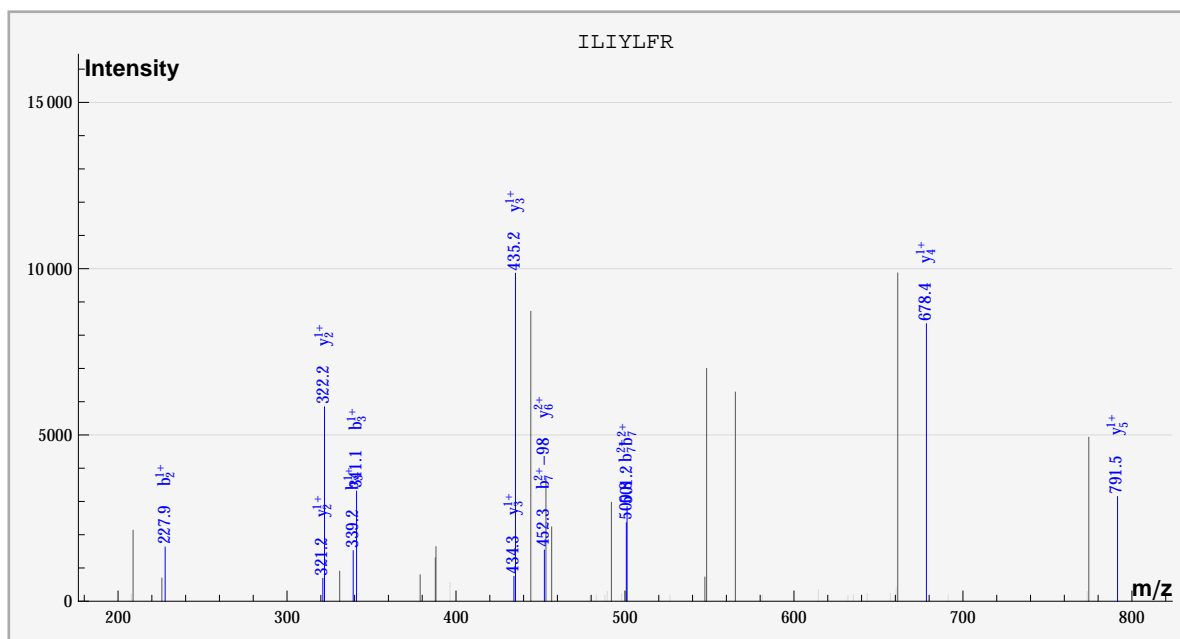

|   | # | b | b* | # | y | y* | P | P* |
|---|---|---|----|---|---|----|---|----|
| I | 1 |   |    |   |   |    |   |    |
| L | 2 | ✓ |    | 6 | ✓ |    |   |    |
| I | 3 | ✓ |    | 5 | ✓ |    |   |    |
| Y | 4 |   |    | 4 | ✓ |    |   |    |
| L | 5 |   |    | 3 | ✓ |    |   |    |
| F | 6 |   |    | 2 | ✓ |    |   |    |
| R | 7 | ✓ | ✓  | 1 |   |    |   |    |

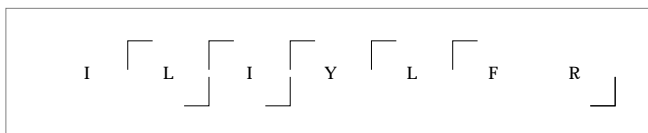

dbConflictWinner true ILIYLFR PHOS(1) 2. 511. -1.71974 5.86046 100. ?  
 3336. S\_Acido\_new%gi|68568039|gb|AAY80968.1| ILIYLFR%:::PHOS:::%sample\_1%compd\_1787

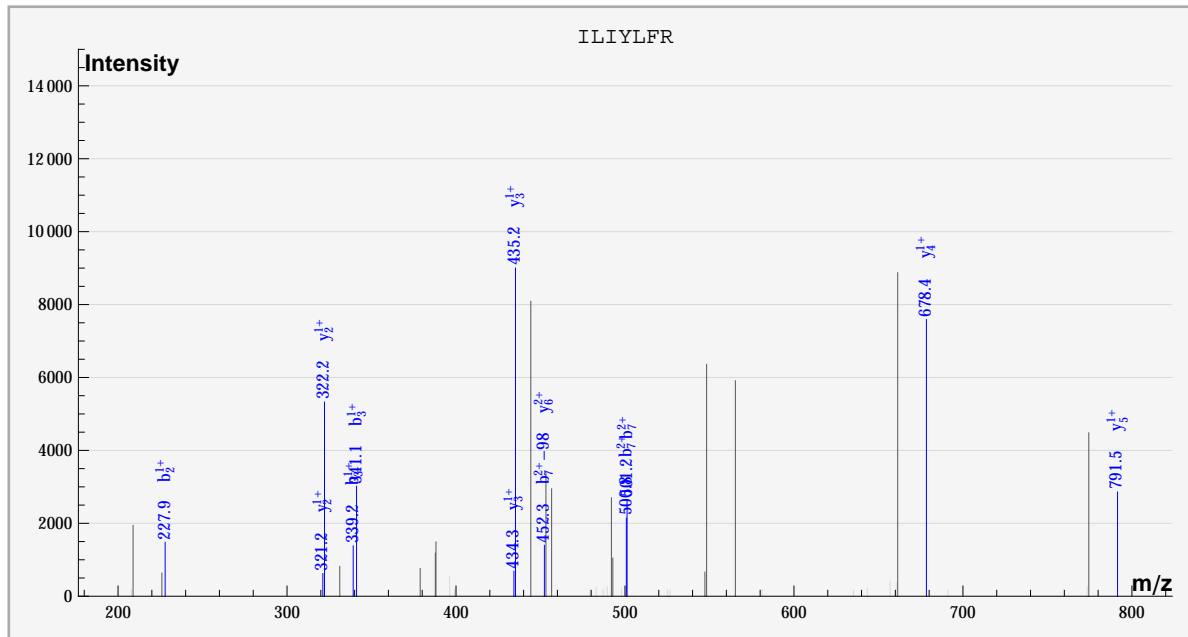

|   | # | b | b* | # | y | y* | P | P* |
|---|---|---|----|---|---|----|---|----|
| I | 1 |   |    |   |   |    |   |    |
| L | 2 | ✓ |    | 6 | ✓ |    |   |    |
| I | 3 | ✓ |    | 5 | ✓ |    |   |    |
| Y | 4 |   |    | 4 | ✓ |    |   |    |
| L | 5 |   |    | 3 | ✓ |    |   |    |
| F | 6 |   |    | 2 | ✓ |    |   |    |
| R | 7 | ✓ | ✓  | 1 |   |    |   |    |

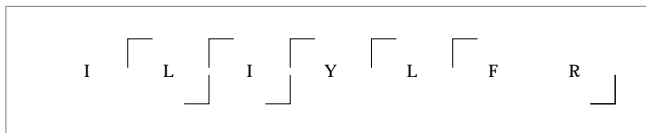

dbConflictWinner true ILIYLFR PHOS(1) 2. 511. -1.71974 5.97248 100. ?  
 3348. S\_Acido\_new%gi|68568039|gb|AAY80968.1| ILIYLFR%:::PHOS:::%sample\_1%compd\_1797

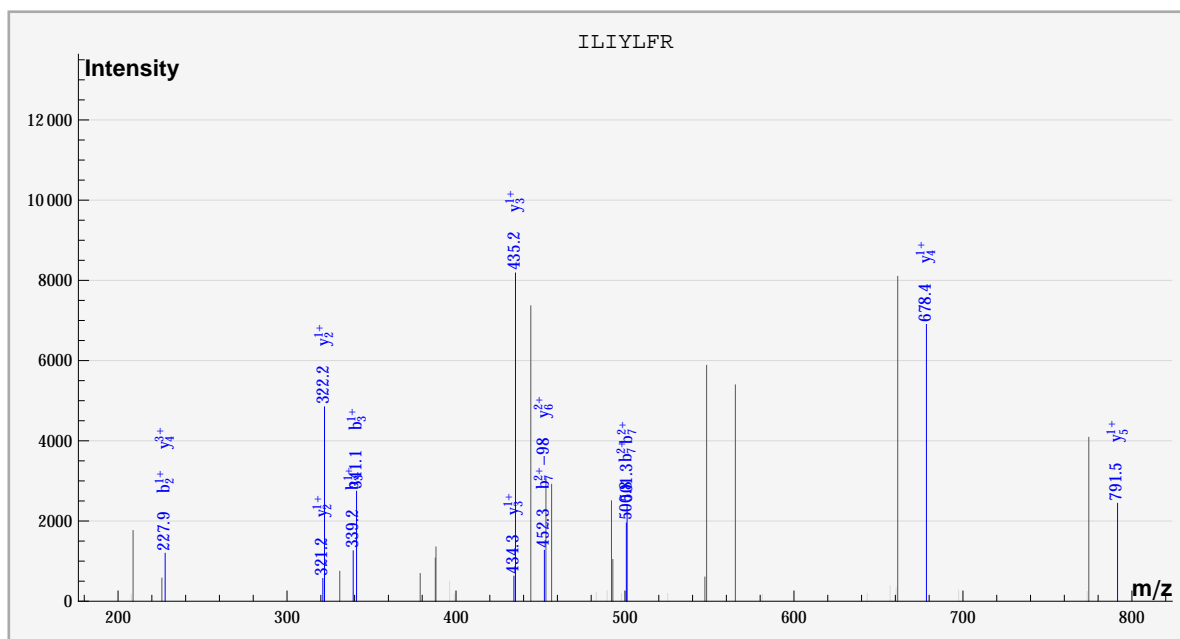

|   | # | b | b* | # | y | y* | P | P* |
|---|---|---|----|---|---|----|---|----|
| I | 1 |   |    |   |   |    |   |    |
| L | 2 | ✓ |    | 6 | ✓ |    |   |    |
| I | 3 | ✓ |    | 5 | ✓ |    |   |    |
| Y | 4 |   |    | 4 | ✓ |    |   |    |
| L | 5 |   |    | 3 | ✓ |    |   |    |
| F | 6 |   |    | 2 | ✓ |    |   |    |
| R | 7 | ✓ | ✓  | 1 |   |    |   |    |

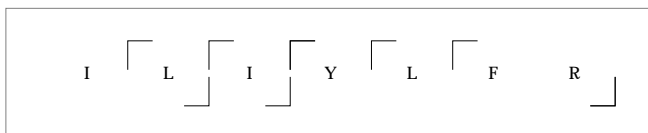

dbConflictWinner true ILIYLFR PHOS(1) 2. 511. -1.71974 6.20698 100. ?  
 3360. S\_Acido\_new%gi|68568039|gb|AAY80968.1| ILIYLFR%:::PHOS:::%sample\_1%compd\_1807

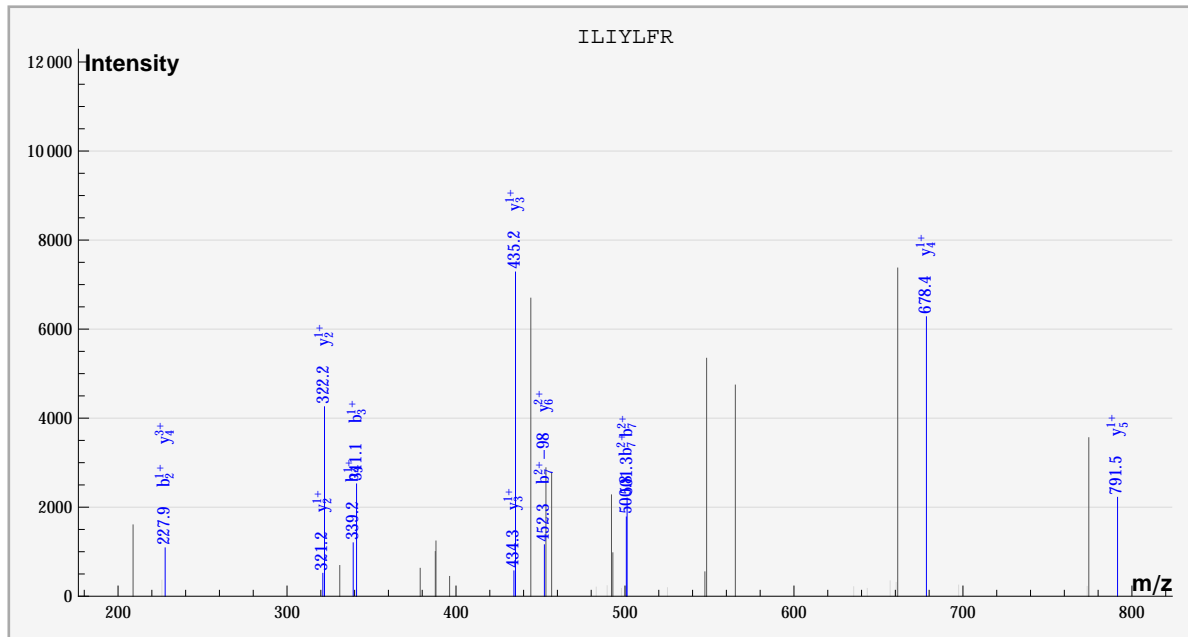

|   | # | b | b* | # | y | y* | P | P* |
|---|---|---|----|---|---|----|---|----|
| I | 1 |   |    |   |   |    |   |    |
| L | 2 | ✓ |    | 6 | ✓ |    |   |    |
| I | 3 | ✓ |    | 5 | ✓ |    |   |    |
| Y | 4 |   |    | 4 | ✓ |    |   |    |
| L | 5 |   |    | 3 | ✓ |    |   |    |
| F | 6 |   |    | 2 | ✓ |    |   |    |
| R | 7 | ✓ | ✓  | 1 |   |    |   |    |

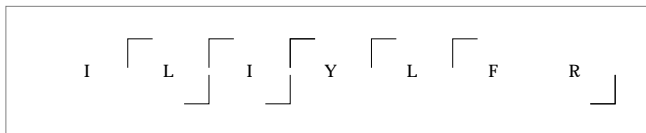

dbConflictWinner true ILIYLFR PHOS(1) 2. 511. -1.71974 6.00243 100. ?  
 3372. S\_Acido\_new%gi|68568039|gb|AAY80968.1| ILIYLFR%:::PHOS:::%sample\_1%compd\_1817

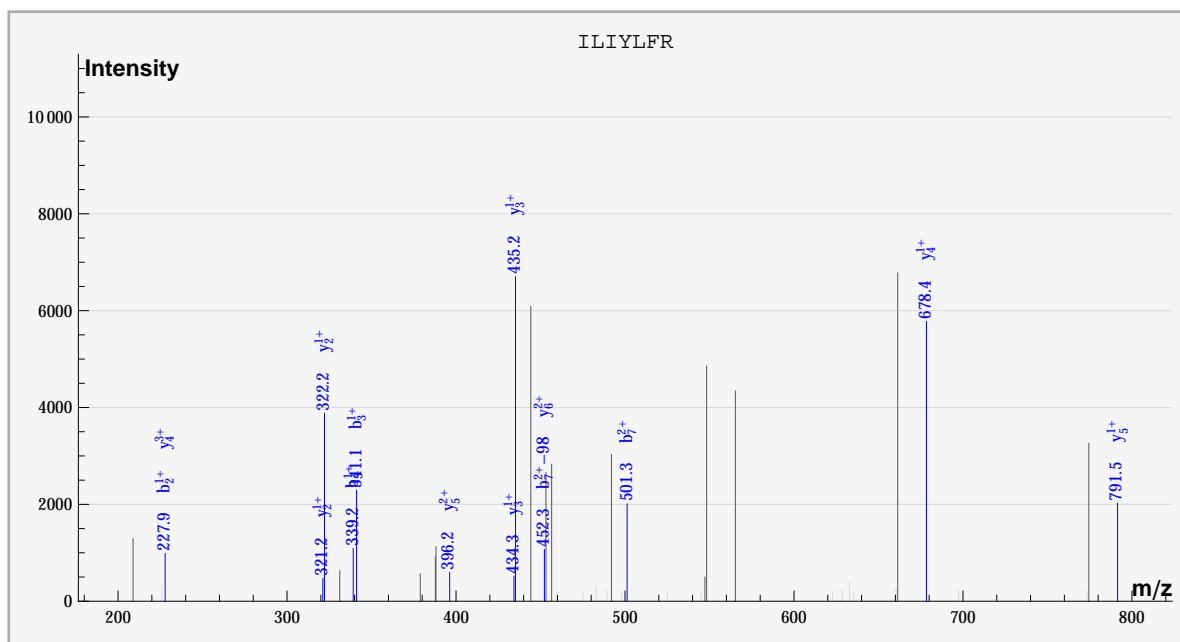

|   | # | b | b* | # | y | y* | P | P* |
|---|---|---|----|---|---|----|---|----|
| I | 1 |   |    |   |   |    |   |    |
| L | 2 | ✓ |    | 6 | ✓ |    |   |    |
| I | 3 | ✓ |    | 5 | ✓ |    |   |    |
| Y | 4 |   |    | 4 | ✓ |    |   |    |
| L | 5 |   |    | 3 | ✓ |    |   |    |
| F | 6 |   |    | 2 | ✓ |    |   |    |
| R | 7 | ✓ | ✓  | 1 |   |    |   |    |





dbConflictWinner true ILIYLFR PHOS(1) 2. 511. -1.71974 6.22905 100. ?  
 3384. S\_Acido\_new%gi|68568039|gb|AAY80968.1| ILIYLFR%:::PHOS:::%sample\_1%compd\_1828

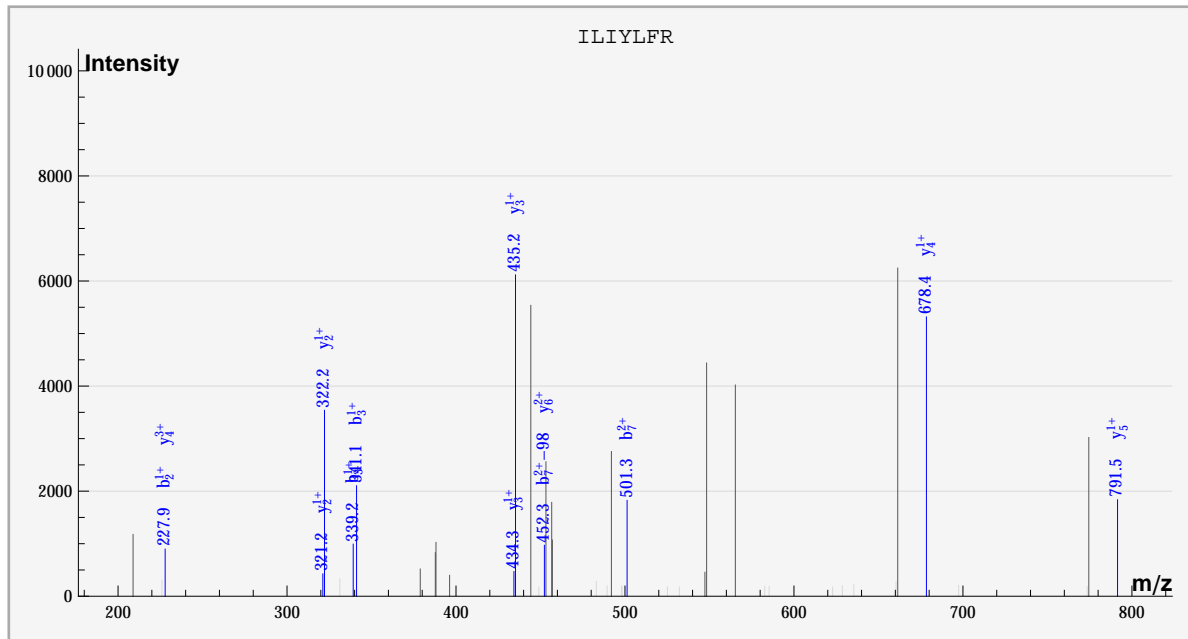

|   | # | b | b* | # | y | y* | P | P* |
|---|---|---|----|---|---|----|---|----|
| I | 1 |   |    |   |   |    |   |    |
| L | 2 | ✓ |    | 6 | ✓ |    |   |    |
| I | 3 | ✓ |    | 5 | ✓ |    |   |    |
| Y | 4 |   |    | 4 | ✓ |    |   |    |
| L | 5 |   |    | 3 | ✓ |    |   |    |
| F | 6 |   |    | 2 | ✓ |    |   |    |
| R | 7 | ✓ | ✓  | 1 |   |    |   |    |



dbConflictWinner true ILIYLFR PHOS(1) 2. 511. -1.71974 6.56848 100. ?  
 3396. S\_Acido\_new%gi|68568039|gb|AAY80968.1| ILIYLFR%:::PHOS:::%sample\_1%compd\_1838

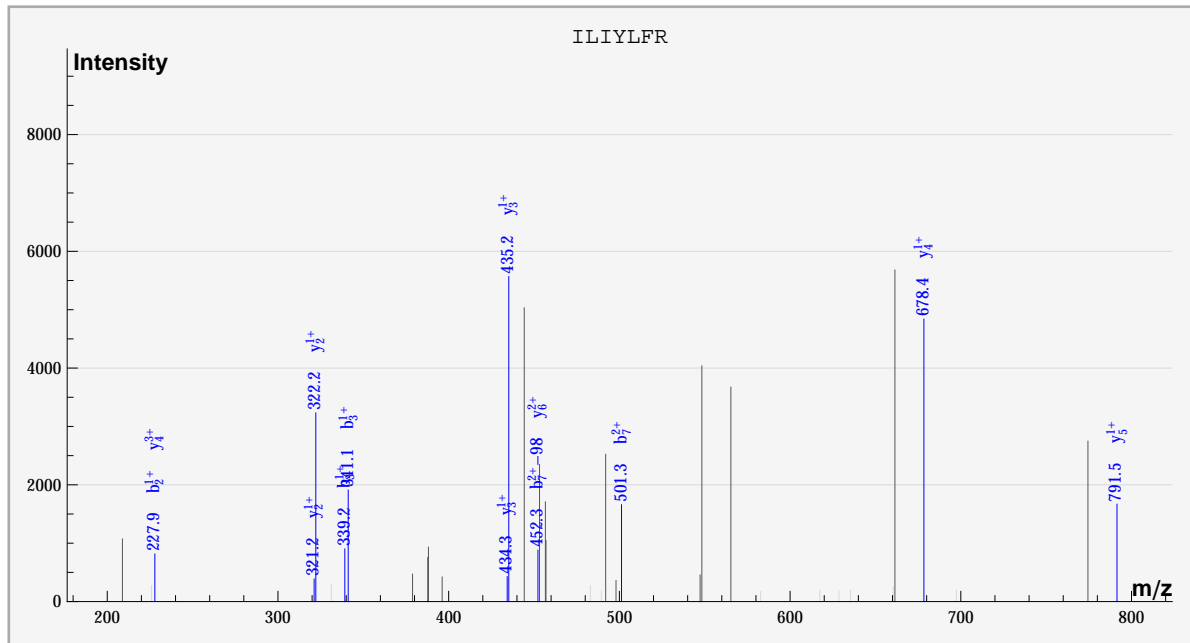

|   | # | b | b* | # | y | y* | P | P* |
|---|---|---|----|---|---|----|---|----|
| I | 1 |   |    |   |   |    |   |    |
| L | 2 | ✓ |    | 6 | ✓ |    |   |    |
| I | 3 | ✓ |    | 5 | ✓ |    |   |    |
| Y | 4 |   |    | 4 | ✓ |    |   |    |
| L | 5 |   |    | 3 | ✓ |    |   |    |
| F | 6 |   |    | 2 | ✓ |    |   |    |
| R | 7 | ✓ | ✓  | 1 |   |    |   |    |

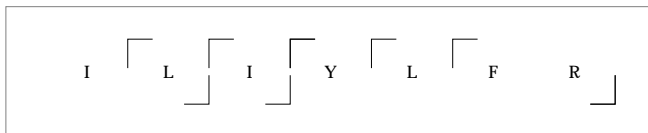

dbConflictWinner true ILIYLFR PHOS(1) 2. 511. -1.71974 6.1768 100. ?  
 3408. S\_Acido\_new%gi|68568039|gb|AAY80968.1| ILIYLFR%:::PHOS:::%sample\_1%compd\_1849

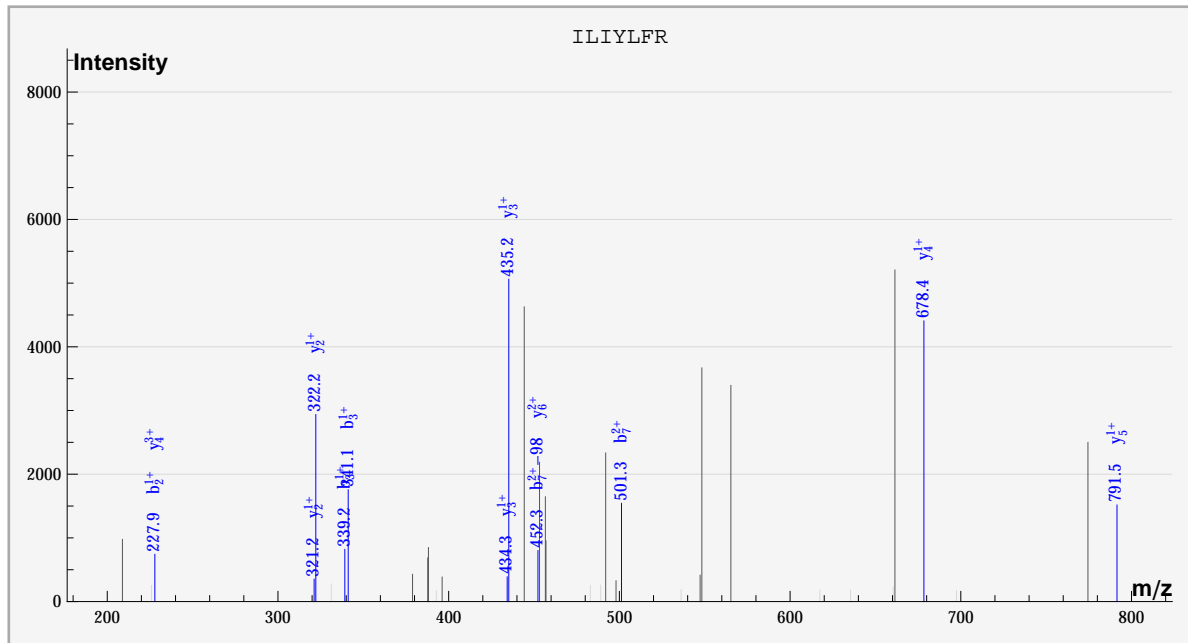

|   | # | b | b* | # | y | y* | P | P* |
|---|---|---|----|---|---|----|---|----|
| I | 1 |   |    |   |   |    |   |    |
| L | 2 | ✓ |    | 6 | ✓ |    |   |    |
| I | 3 | ✓ |    | 5 | ✓ |    |   |    |
| Y | 4 |   |    | 4 | ✓ |    |   |    |
| L | 5 |   |    | 3 | ✓ |    |   |    |
| F | 6 |   |    | 2 | ✓ |    |   |    |
| R | 7 | ✓ | ✓  | 1 |   |    |   |    |

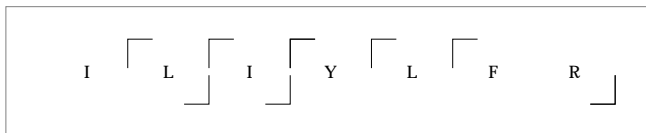



dbConflictWinner true ILIYLFR PHOS(1) 2. 511. -1.71974 5.813 100. ?  
 3432. S\_Acido\_new%gi|68568039|gb|AAY80968.1| ILIYLFR%:::PHOS:::%sample\_1%compd\_1869

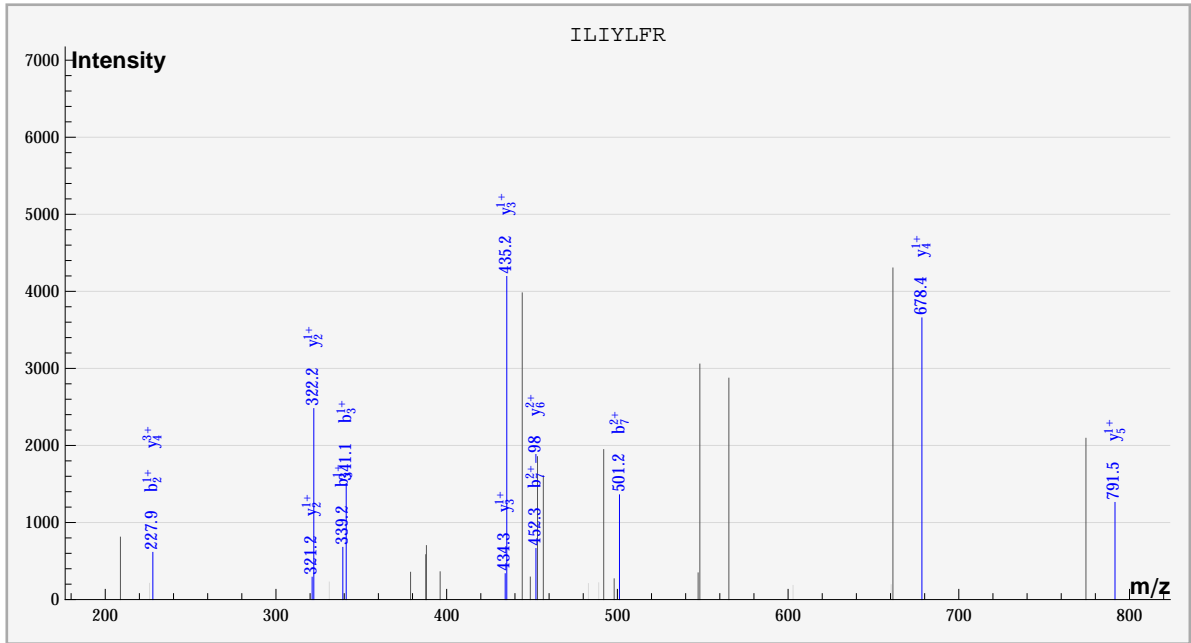

|   | # | b | b* | # | y | y* | P | P* |
|---|---|---|----|---|---|----|---|----|
| I | 1 |   |    |   |   |    |   |    |
| L | 2 | ✓ |    | 6 | ✓ |    |   |    |
| I | 3 | ✓ |    | 5 | ✓ |    |   |    |
| Y | 4 |   |    | 4 | ✓ |    |   |    |
| L | 5 |   |    | 3 | ✓ |    |   |    |
| F | 6 |   |    | 2 | ✓ |    |   |    |
| R | 7 | ✓ | ✓  | 1 |   |    |   |    |

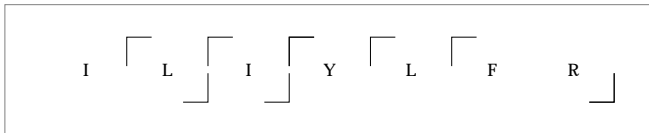

dbConflictWinner true ILIYLFR PHOS(1) 2. 511. -1.71974 5.83544 100. ?  
 3444. S\_Acido\_new%gi|68568039|gb|AAY80968.1| ILIYLFR%:::PHOS:::%sample\_1%compd\_1879

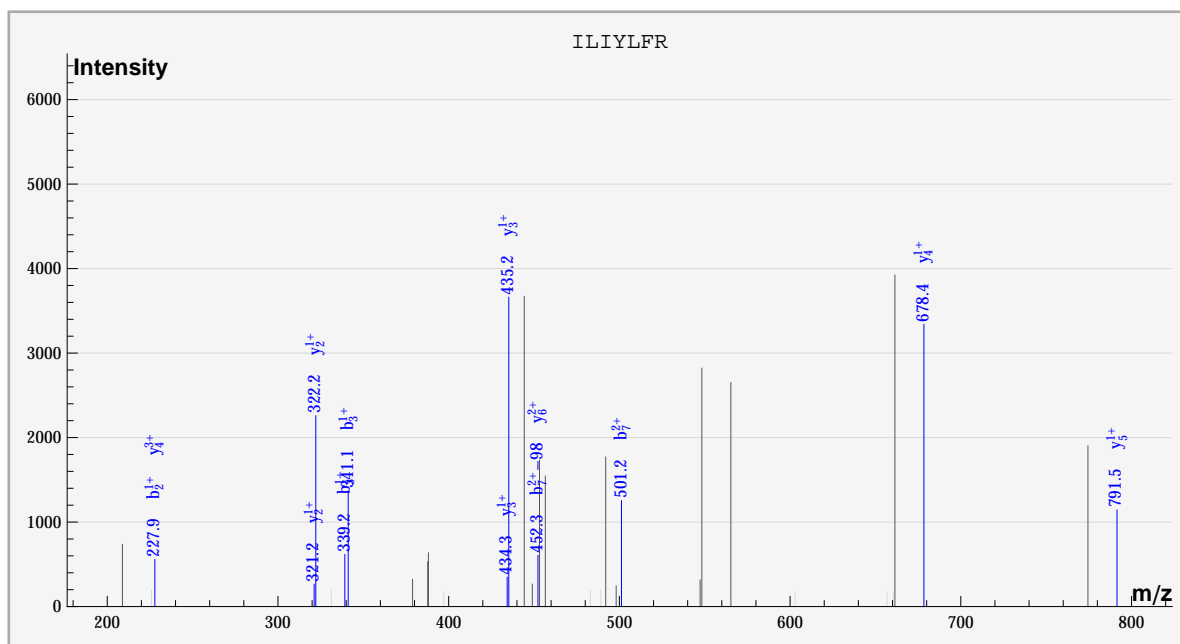

|   | # | b | b* | # | y | y* | P | P* |
|---|---|---|----|---|---|----|---|----|
| I | 1 |   |    |   |   |    |   |    |
| L | 2 | ✓ |    | 6 | ✓ |    |   |    |
| I | 3 | ✓ |    | 5 | ✓ |    |   |    |
| Y | 4 |   |    | 4 | ✓ |    |   |    |
| L | 5 |   |    | 3 | ✓ |    |   |    |
| F | 6 |   |    | 2 | ✓ |    |   |    |
| R | 7 | ✓ | ✓  | 1 |   |    |   |    |

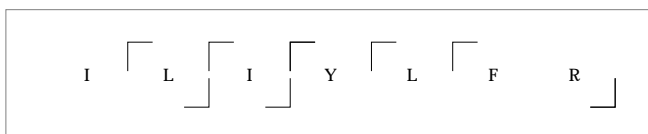

dbConflictWinner true ILIYLFR PHOS(1) 2. 511. -1.71974 5.90077 100. ?  
 3456. S\_Acido\_new%gi|68568039|gb|AAY80968.1| ILIYLFR%:::PHOS:::%sample\_1%compd\_1889

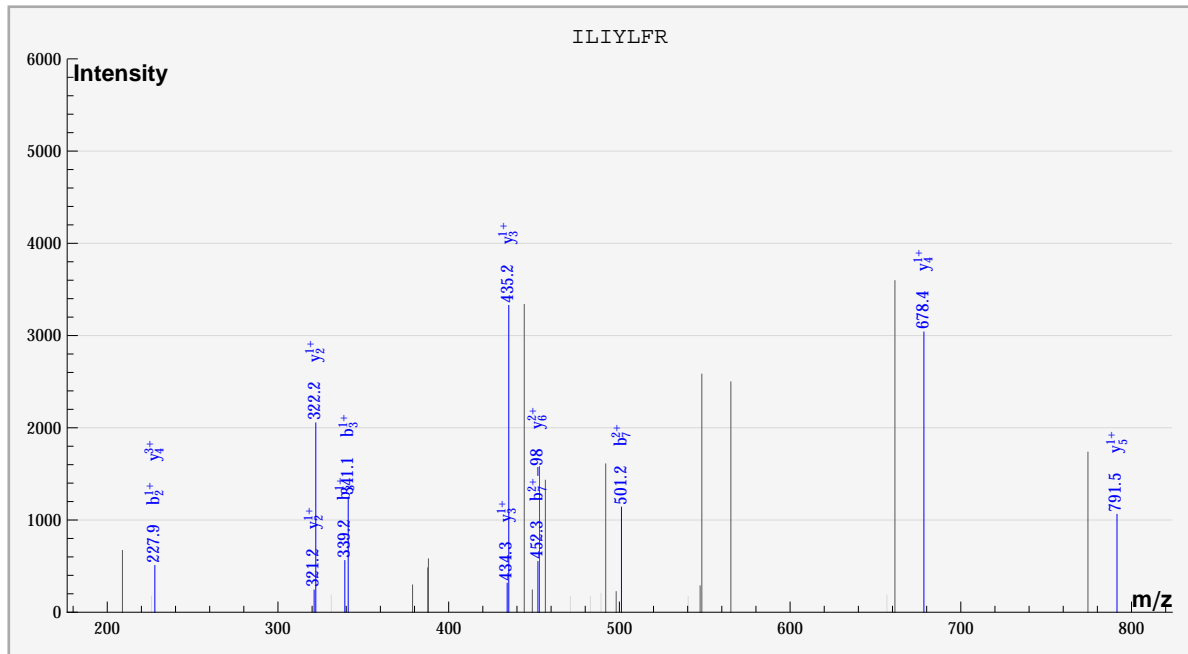

|   | # | b | b* | # | y | y* | P | P* |
|---|---|---|----|---|---|----|---|----|
| I | 1 |   |    |   |   |    |   |    |
| L | 2 | ✓ |    | 6 | ✓ |    |   |    |
| I | 3 | ✓ |    | 5 | ✓ |    |   |    |
| Y | 4 |   |    | 4 | ✓ |    |   |    |
| L | 5 |   |    | 3 | ✓ |    |   |    |
| F | 6 |   |    | 2 | ✓ |    |   |    |
| R | 7 | ✓ | ✓  | 1 |   |    |   |    |

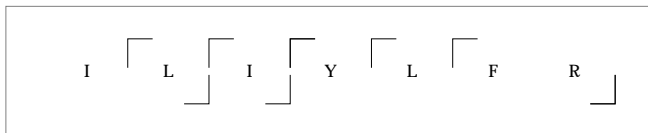

dbConflictWinner true ILIYLFR PHOS(1) 2. 511. -1.71974 5.81872 100. ?  
 3468. S\_Acido\_new%gi|68568039|gb|AAY80968.1| ILIYLFR%:::PHOS:::%sample\_1%compd\_1899

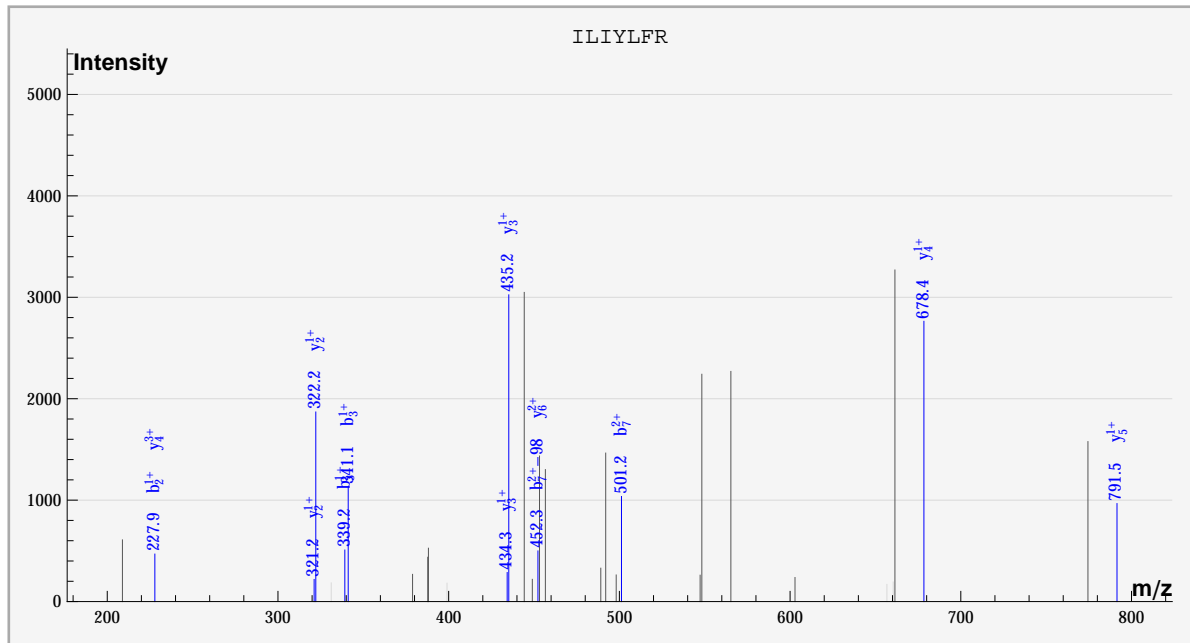

|   | # | b | b* | # | y | y* | P | P* |
|---|---|---|----|---|---|----|---|----|
| I | 1 |   |    |   |   |    |   |    |
| L | 2 | ✓ |    | 6 | ✓ |    |   |    |
| I | 3 | ✓ |    | 5 | ✓ |    |   |    |
| Y | 4 |   |    | 4 | ✓ |    |   |    |
| L | 5 |   |    | 3 | ✓ |    |   |    |
| F | 6 |   |    | 2 | ✓ |    |   |    |
| R | 7 | ✓ | ✓  | 1 |   |    |   |    |





dbConflictWinner true ILIYLFR PHOS(1) 2. 511. -1.71974 5.72028 100. ?  
 3480. S\_Acido\_new%gi|68568039|gb|AAY80968.1| ILIYLFR%:::PHOS:::%sample\_1%compd\_1909

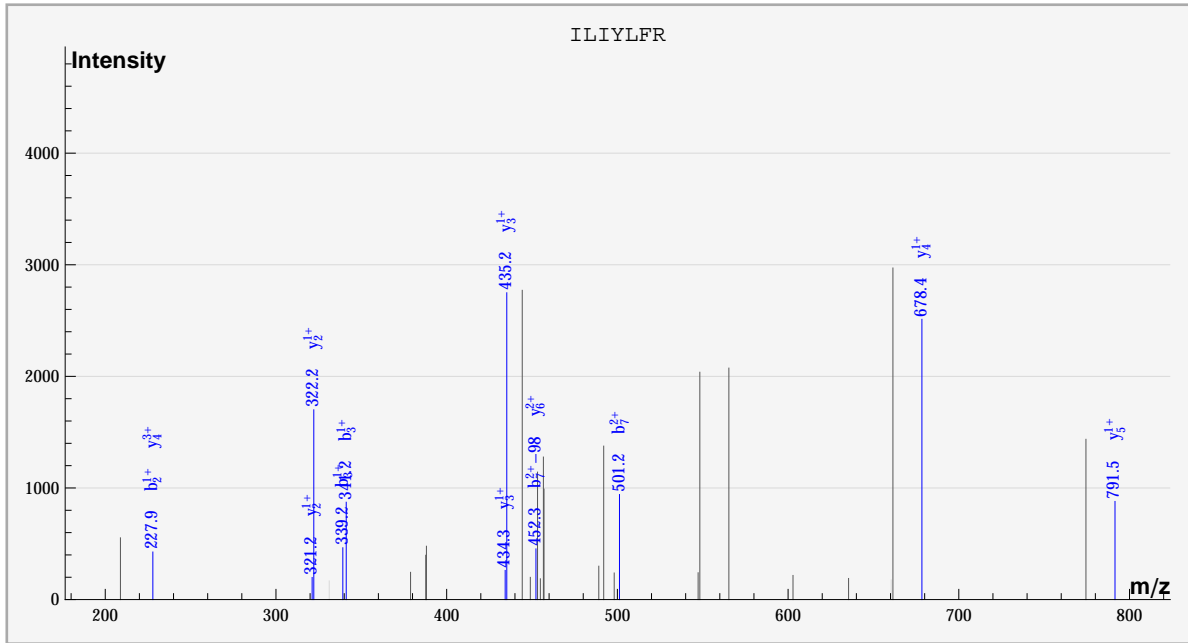

|   | # | b | b* | # | y | y* | P | P* |
|---|---|---|----|---|---|----|---|----|
| I | 1 |   |    |   |   |    |   |    |
| L | 2 | ✓ |    | 6 | ✓ |    |   |    |
| I | 3 | ✓ |    | 5 | ✓ |    |   |    |
| Y | 4 |   |    | 4 | ✓ |    |   |    |
| L | 5 |   |    | 3 | ✓ |    |   |    |
| F | 6 |   |    | 2 | ✓ |    |   |    |
| R | 7 | ✓ | ✓  | 1 |   |    |   |    |

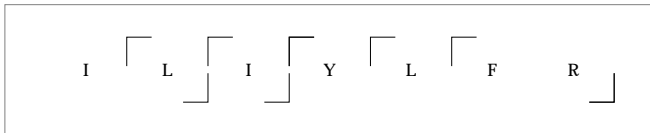

dbConflictWinner true ILIYLFR PHOS(1) 2. 511. -1.71974 5.80154 100. ?  
 3492. S\_Acido\_new%gi|68568039|gb|AAY80968.1| ILIYLFR%:::PHOS:::%sample\_1%compd\_1919

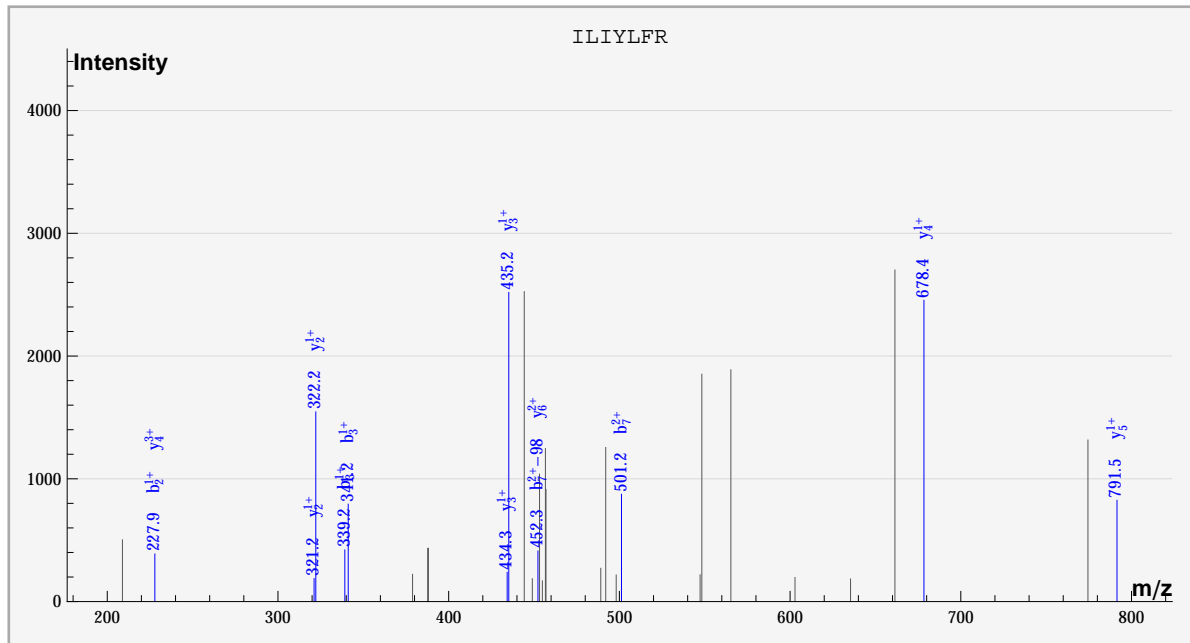

|   | # | b | b* | # | y | y* | P | P* |
|---|---|---|----|---|---|----|---|----|
| I | 1 |   |    |   |   |    |   |    |
| L | 2 | ✓ |    | 6 | ✓ |    |   |    |
| I | 3 | ✓ |    | 5 | ✓ |    |   |    |
| Y | 4 |   |    | 4 | ✓ |    |   |    |
| L | 5 |   |    | 3 | ✓ |    |   |    |
| F | 6 |   |    | 2 | ✓ |    |   |    |
| R | 7 | ✓ | ✓  | 1 |   |    |   |    |

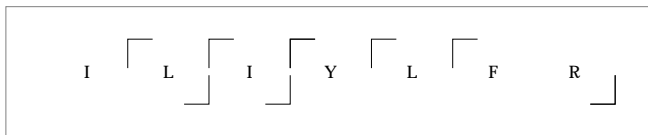

dbConflictWinner true ILIYLFR PHOS(1) 2. 511. -1.71974 5.9019 100. ?  
 3504. S\_Acido\_new%gi|68568039|gb|AAY80968.1| ILIYLFR%:::PHOS:::%sample\_1%compd\_1930

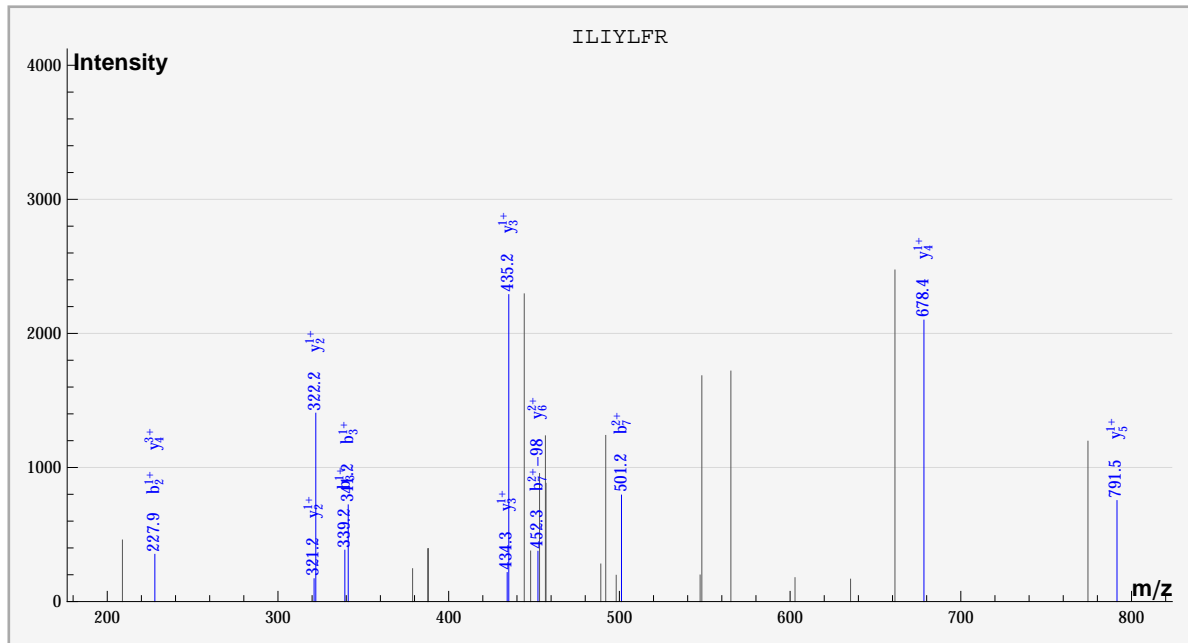

|   | # | b | b* | # | y | y* | P | P* |
|---|---|---|----|---|---|----|---|----|
| I | 1 |   |    |   |   |    |   |    |
| L | 2 | ✓ |    | 6 | ✓ |    |   |    |
| I | 3 | ✓ |    | 5 | ✓ |    |   |    |
| Y | 4 |   |    | 4 | ✓ |    |   |    |
| L | 5 |   |    | 3 | ✓ |    |   |    |
| F | 6 |   |    | 2 | ✓ |    |   |    |
| R | 7 | ✓ | ✓  | 1 |   |    |   |    |



dbValid true ILIYLFR PHOS(1) 2. 511. -1.71974 6.05451 100. ? 3516.

S\_Acido\_new%gi|68568039|gb|AAY80968.1| ILIYLFR%::::PHOS::::sample\_1%compd\_1940

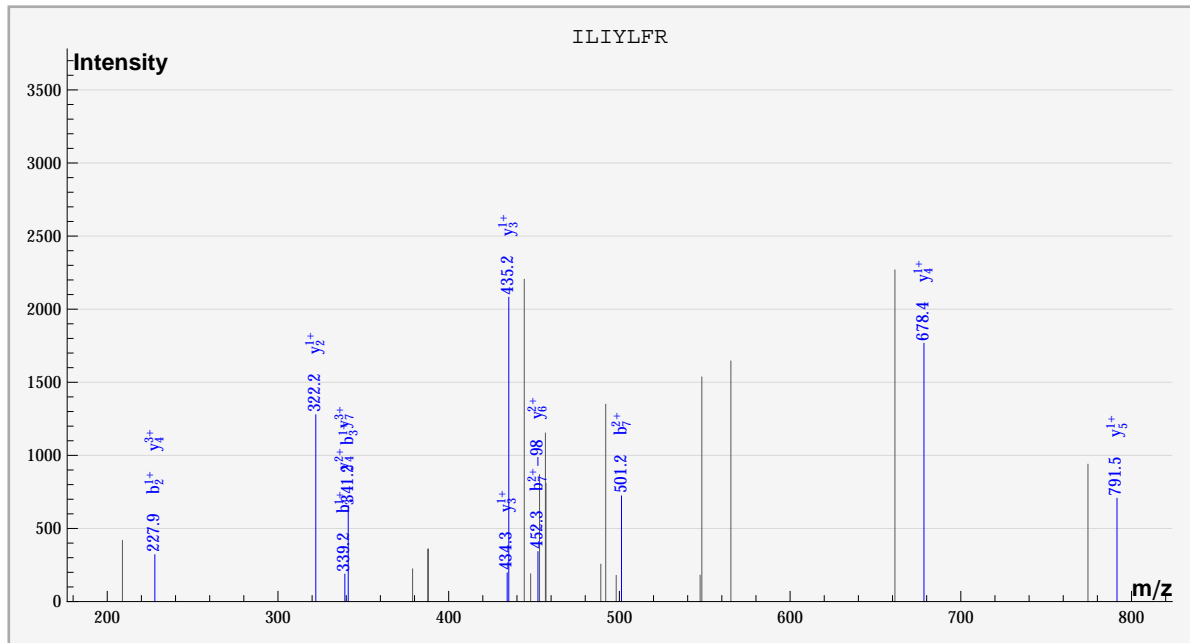

|   | # | b | b* | # | y | y* | P | P* |
|---|---|---|----|---|---|----|---|----|
| I | 1 |   |    |   |   |    |   | ✓  |
| L | 2 | ✓ |    | 6 | ✓ |    |   |    |
| I | 3 | ✓ |    | 5 | ✓ |    |   |    |
| Y | 4 |   |    | 4 | ✓ |    |   |    |
| L | 5 |   |    | 3 | ✓ |    |   |    |
| F | 6 |   |    | 2 | ✓ |    |   |    |
| R | 7 | ✓ | ✓  | 1 |   |    |   |    |

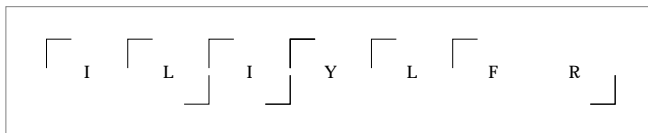

dbValid true ILIYLFR PHOS(1) 2. 511. -1.71974 5.3358 100. ? 3522.

S\_Acido\_new%gi|68568039|gb|AAY80968.1| ILIYLFR%::::PHOS::::%sample\_0%compd\_2100

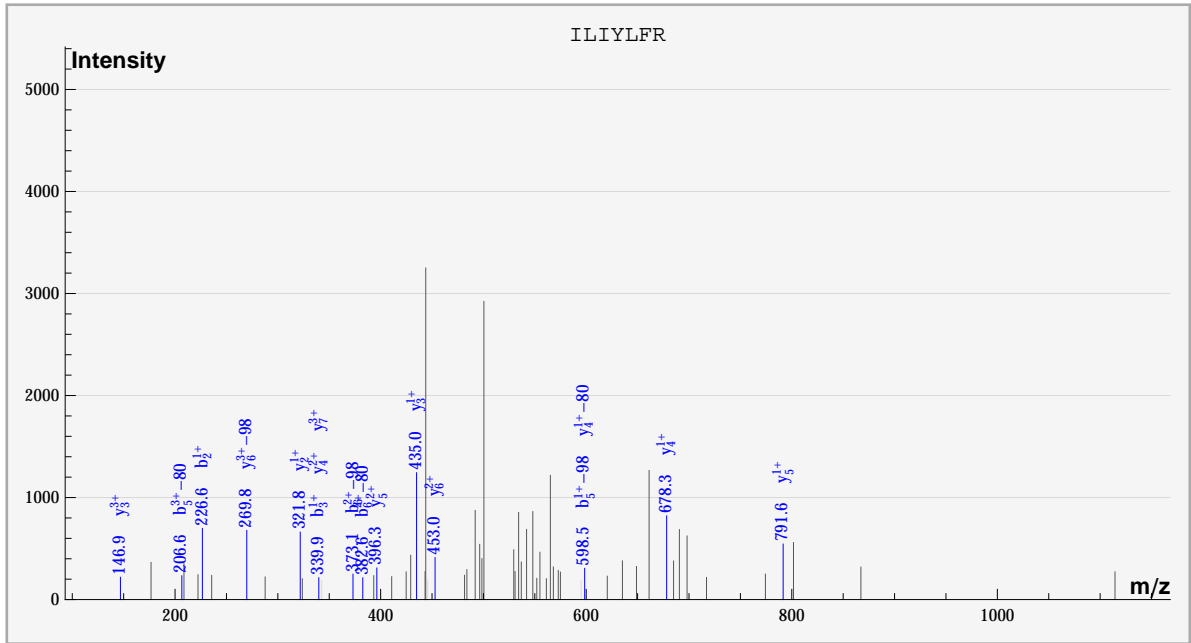

|   | # | b | b* | # | y | y* | P | P* |
|---|---|---|----|---|---|----|---|----|
| I | 1 |   |    |   |   |    |   | ✓  |
| L | 2 | ✓ |    | 6 | ✓ | ✓  |   |    |
| I | 3 | ✓ |    | 5 | ✓ |    |   |    |
| Y | 4 |   |    | 4 | ✓ | ✓  |   |    |
| L | 5 |   | ✓  | 3 | ✓ |    |   |    |
| F | 6 |   | ✓  | 2 | ✓ |    |   |    |
| R | 7 |   |    | 1 |   |    |   |    |

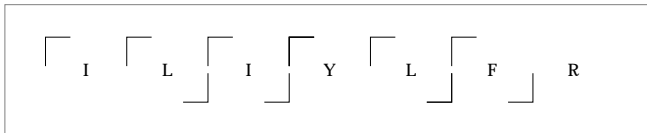

dbValid true ILIYLFR PHOS(1) 2. 511. -1.71974 6.04676 100. ? 3528.

S\_Acido\_new%gi|68568039|gb|AAY80968.1| ILIYLFR%::::PHOS:::%sample\_1%cmpd\_1951

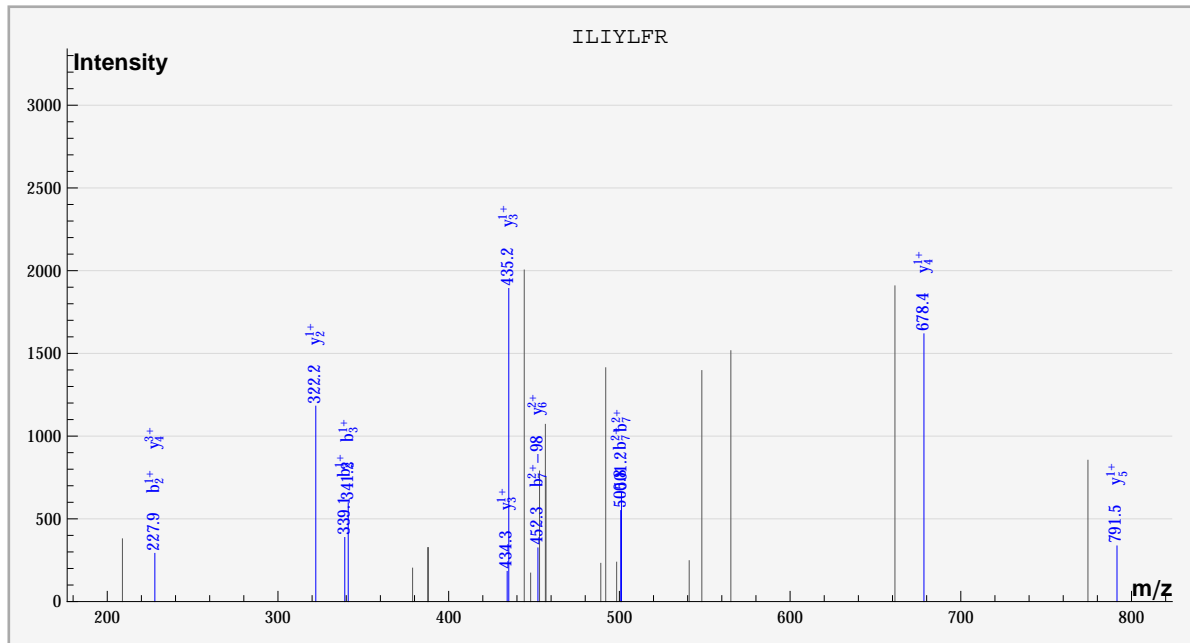

|   | # | b | b* | # | y | y* | P | P* |
|---|---|---|----|---|---|----|---|----|
| I | 1 |   |    |   |   |    |   |    |
| L | 2 | ✓ |    | 6 | ✓ |    |   |    |
| I | 3 | ✓ |    | 5 | ✓ |    |   |    |
| Y | 4 |   |    | 4 | ✓ |    |   |    |
| L | 5 |   |    | 3 | ✓ |    |   |    |
| F | 6 |   |    | 2 | ✓ |    |   |    |
| R | 7 | ✓ | ✓  | 1 |   |    |   |    |



dbValid true ILIYLFR PHOS(1) 2. 511. -1.71974 6.18483 100. ? 3540.

S\_Acido\_new%gi|68568039|gb|AAY80968.1| ILIYLFR%::::PHOS::::sample\_1%compd\_1961

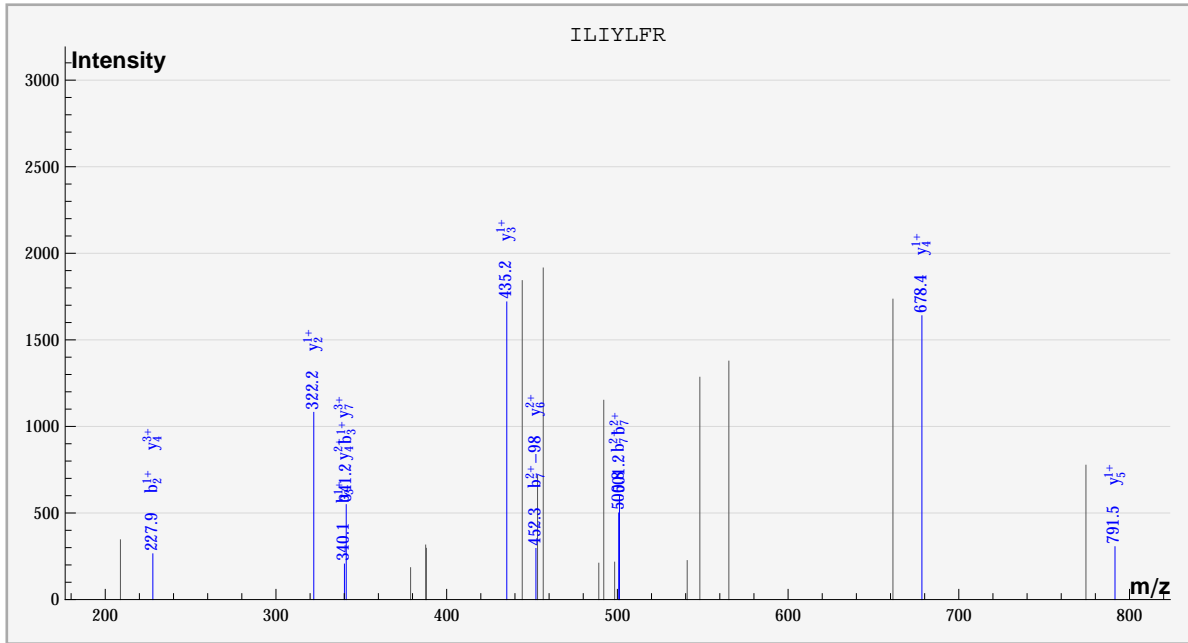

|   | # | b | b* | # | y | y* | P | P* |
|---|---|---|----|---|---|----|---|----|
| I | 1 |   |    |   |   |    |   | ✓  |
| L | 2 | ✓ |    | 6 | ✓ |    |   |    |
| I | 3 | ✓ |    | 5 | ✓ |    |   |    |
| Y | 4 |   |    | 4 | ✓ |    |   |    |
| L | 5 |   |    | 3 | ✓ |    |   |    |
| F | 6 |   |    | 2 | ✓ |    |   |    |
| R | 7 | ✓ | ✓  | 1 |   |    |   |    |

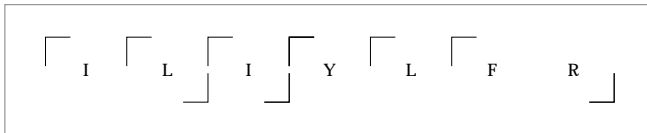

dbValid true ILIYLFR PHOS(1) 2. 511. -1.71974 6.20794 100. ? 3552.

S\_Acido\_new%gi|68568039|gb|AAY80968.1| ILIYLFR%::::PHOS:::%sample\_1%compd\_1971

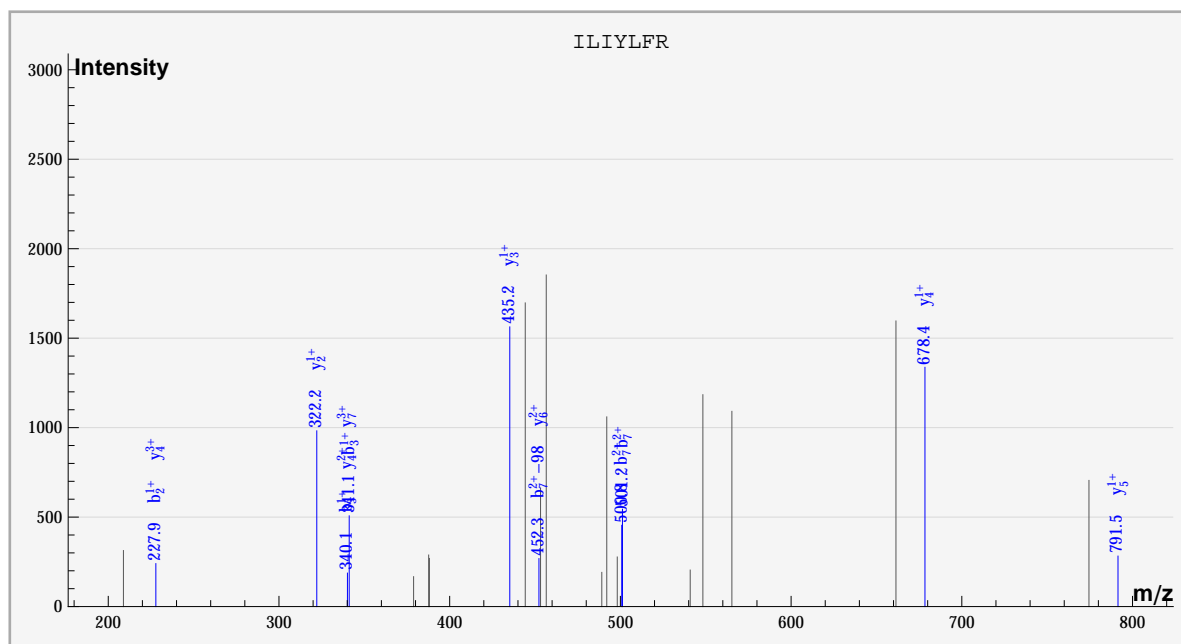

|   | # | b | b* | # | y | y* | P | P* |
|---|---|---|----|---|---|----|---|----|
| I | 1 |   |    |   |   |    |   | ✓  |
| L | 2 | ✓ |    | 6 | ✓ |    |   |    |
| I | 3 | ✓ |    | 5 | ✓ |    |   |    |
| Y | 4 |   |    | 4 | ✓ |    |   |    |
| L | 5 |   |    | 3 | ✓ |    |   |    |
| F | 6 |   |    | 2 | ✓ |    |   |    |
| R | 7 | ✓ | ✓  | 1 |   |    |   |    |

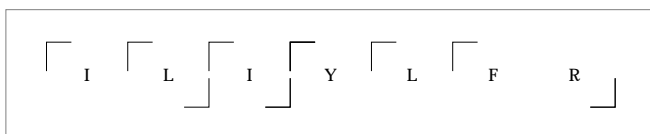



dbValid true ILIYLFR PHOS(1) 2. 511. -1.71974 6.23075 100. ? 3564.

S\_Acido\_new%gi|68568039|gb|AAY80968.1| ILIYLFR%::::PHOS::::%sample\_1%compd\_1981

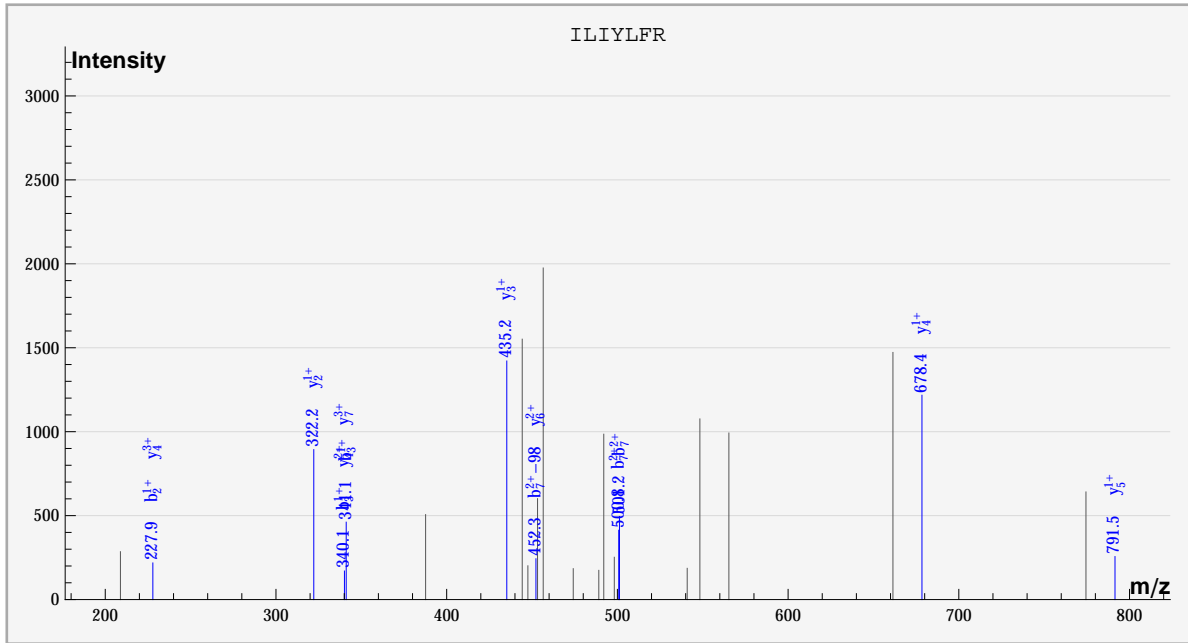

|   | # | b | b* | # | y | y* | P | P* |
|---|---|---|----|---|---|----|---|----|
| I | 1 |   |    |   |   |    |   | ✓  |
| L | 2 | ✓ |    | 6 | ✓ |    |   |    |
| I | 3 | ✓ |    | 5 | ✓ |    |   |    |
| Y | 4 |   |    | 4 | ✓ |    |   |    |
| L | 5 |   |    | 3 | ✓ |    |   |    |
| F | 6 |   |    | 2 | ✓ |    |   |    |
| R | 7 | ✓ | ✓  | 1 |   |    |   |    |



dbValid true ILIYLFR PHOS(1) 2. 511. -1.71974 5.754 100. ? 3576.  
 S\_Acido\_new%gi|68568039|gb|AAY80968.1| ILIYLFR%::::PHOS::::%sample\_1%cmpd\_1991

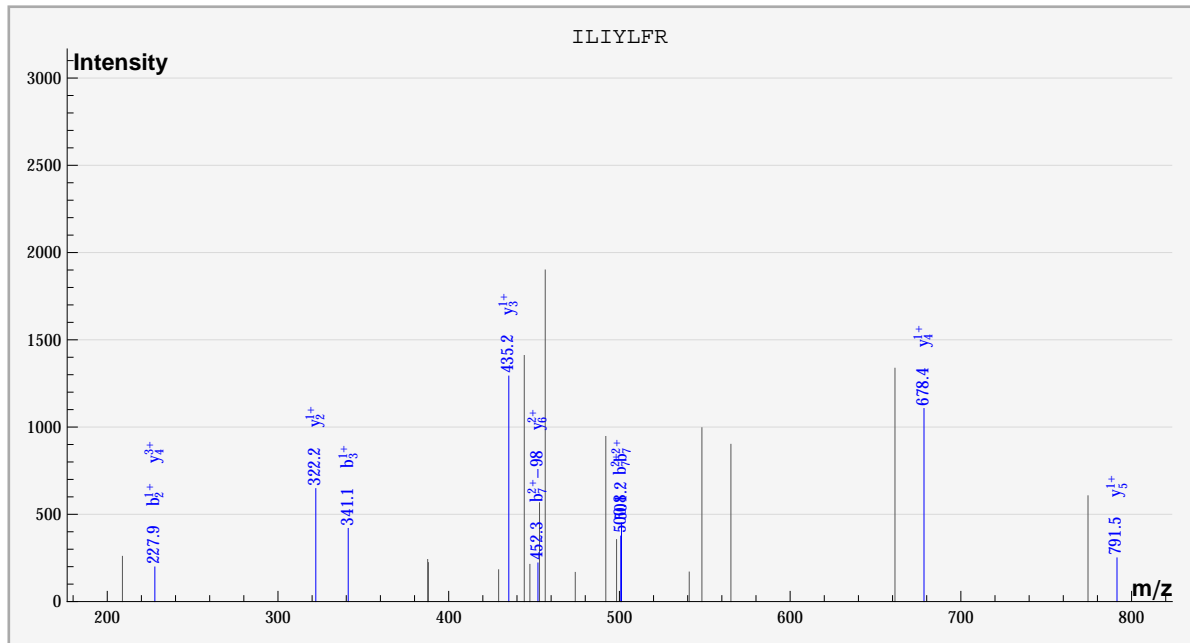

|   | # | b | b* | # | y | y* | P | P* |
|---|---|---|----|---|---|----|---|----|
| I | 1 |   |    |   |   |    |   |    |
| L | 2 | ✓ |    | 6 | ✓ |    |   |    |
| I | 3 | ✓ |    | 5 | ✓ |    |   |    |
| Y | 4 |   |    | 4 | ✓ |    |   |    |
| L | 5 |   |    | 3 | ✓ |    |   |    |
| F | 6 |   |    | 2 | ✓ |    |   |    |
| R | 7 | ✓ | ✓  | 1 |   |    |   |    |



dbValid true ILIYLFR PHOS(1) 2. 511. -1.71974 5.74902 100. ? 3588.

S\_Acido\_new%gi|68568039|gb|AAY80968.1| ILIYLFR%::::PHOS::::%sample\_1%compd\_2001

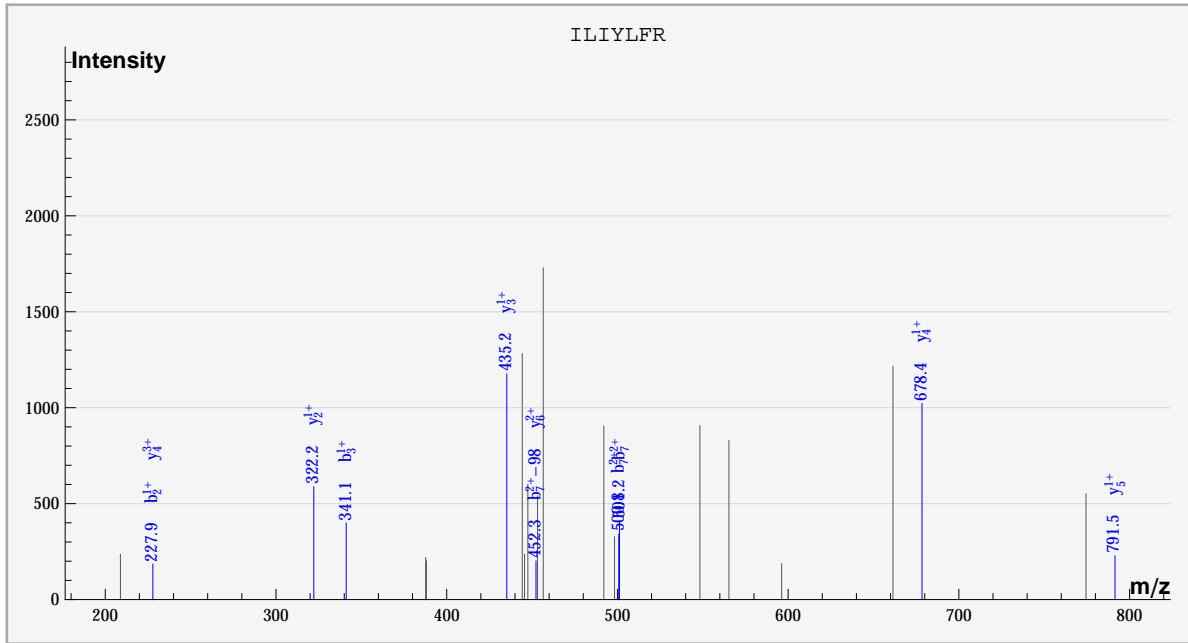

|   | # | b | b* | # | y | y* | P | P* |
|---|---|---|----|---|---|----|---|----|
| I | 1 |   |    |   |   |    |   |    |
| L | 2 | ✓ |    | 6 | ✓ |    |   |    |
| I | 3 | ✓ |    | 5 | ✓ |    |   |    |
| Y | 4 |   |    | 4 | ✓ |    |   |    |
| L | 5 |   |    | 3 | ✓ |    |   |    |
| F | 6 |   |    | 2 | ✓ |    |   |    |
| R | 7 | ✓ | ✓  | 1 |   |    |   |    |

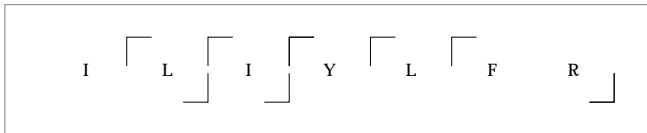

dbValid true ILIYLFR PHOS(1) 2. 511. -1.71974 6.14055 100. ? 3600.

S\_Acido\_new%gi|68568039|gb|AAY80968.1| ILIYLFR%::::PHOS::::%sample\_1%compd\_2011

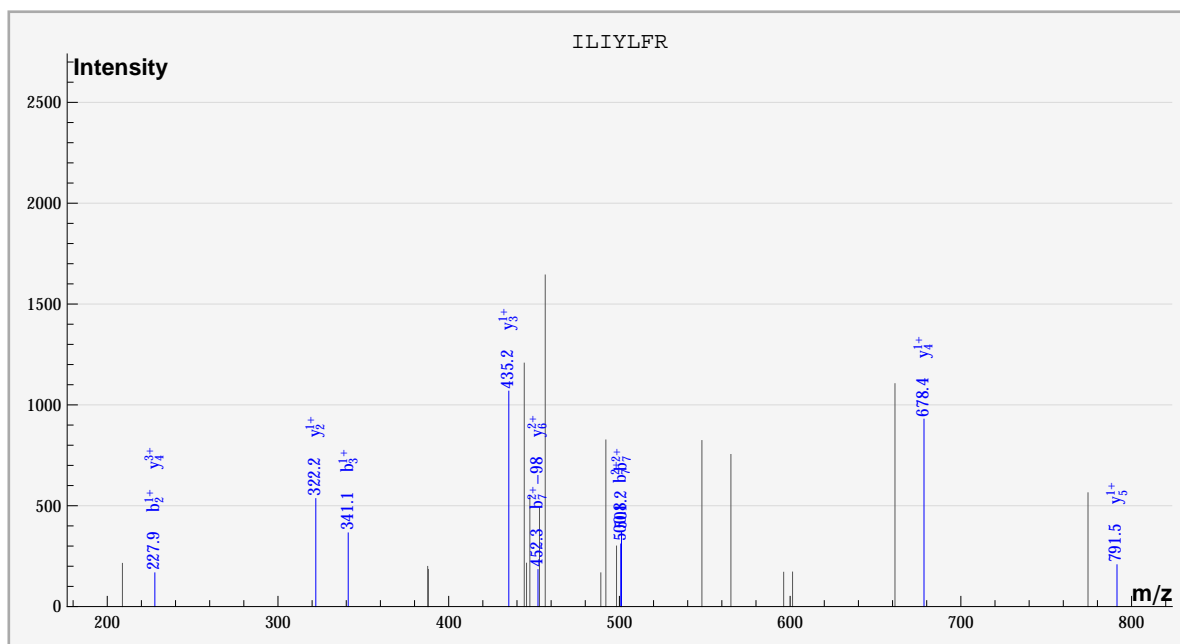

|   | # | b | b* | # | y | y* | P | P* |
|---|---|---|----|---|---|----|---|----|
| I | 1 |   |    |   |   |    |   |    |
| L | 2 | ✓ |    | 6 | ✓ |    |   |    |
| I | 3 | ✓ |    | 5 | ✓ |    |   |    |
| Y | 4 |   |    | 4 | ✓ |    |   |    |
| L | 5 |   |    | 3 | ✓ |    |   |    |
| F | 6 |   |    | 2 | ✓ |    |   |    |
| R | 7 | ✓ | ✓  | 1 |   |    |   |    |

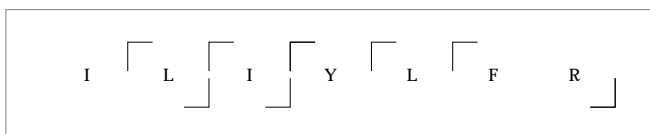

dbValid true YTEGSFR PHOS(2) 2. 511. -0.832828 4.95067 100. ? 4038.  
 S\_Acido\_new%gi|68568724|gb|AAY81653.1| YTEGSFR%:PHOS:::PHOS:::%sample\_0%cmpd\_2576

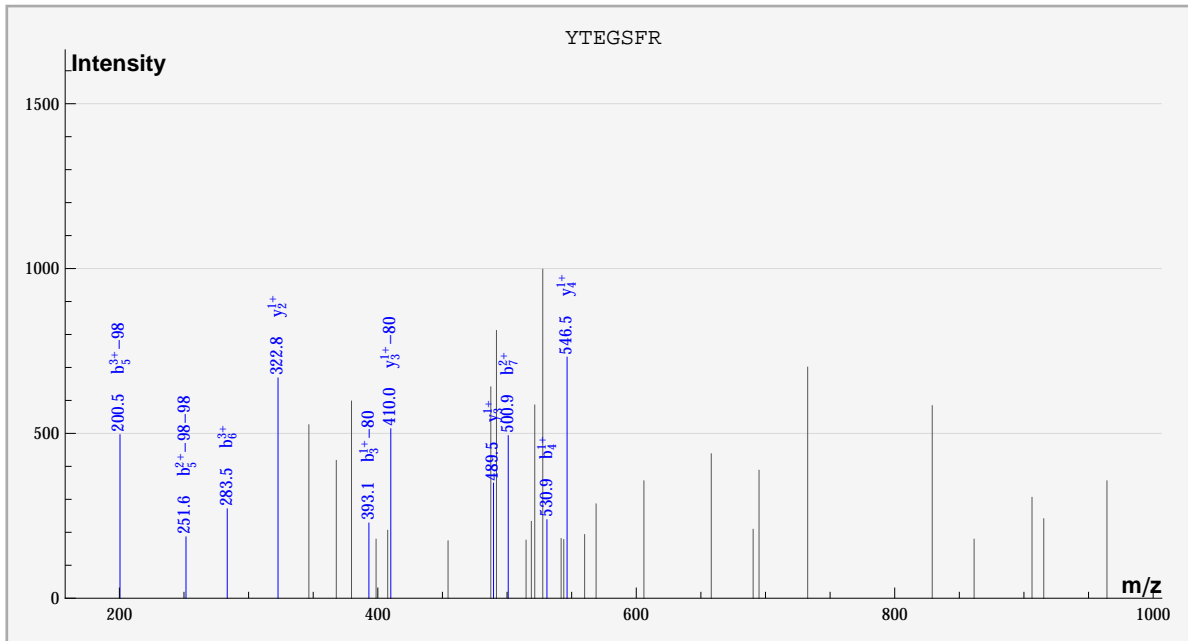

|   | # | b | b* | # | y | y* | P | P* |
|---|---|---|----|---|---|----|---|----|
| Y | 1 |   |    |   |   |    |   |    |
| T | 2 |   |    | 6 |   |    |   |    |
| E | 3 |   | ✓  | 5 |   |    |   |    |
| G | 4 | ✓ |    | 4 | ✓ |    |   |    |
| S | 5 |   | ✓  | 3 | ✓ | ✓  |   |    |
| F | 6 | ✓ |    | 2 | ✓ |    |   |    |
| R | 7 | ✓ |    | 1 |   |    |   |    |

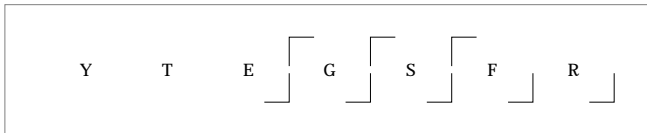

dbValid true FRNALYR PHOS(1) 2. 512. -1.75525 5.08547 100. ? 1758.

S\_Acido\_new%gi68567555|gb|AAY80484.1| FRNALYR%:::PHOS:::sample\_2%compd\_472

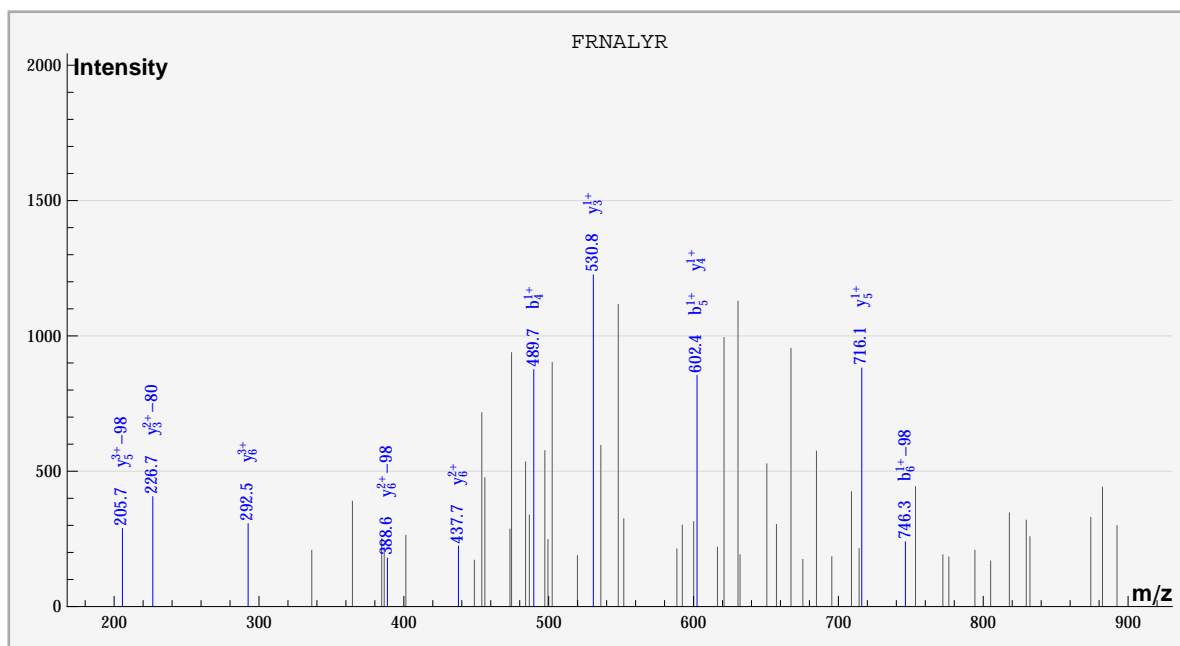

|   | # | b | b* | # | y | y* | P | P* |
|---|---|---|----|---|---|----|---|----|
| F | 1 |   |    |   |   |    |   |    |
| R | 2 |   |    | 6 | ✓ | ✓  |   |    |
| N | 3 |   |    | 5 | ✓ | ✓  |   |    |
| A | 4 | ✓ |    | 4 | ✓ |    |   |    |
| L | 5 | ✓ |    | 3 | ✓ | ✓  |   |    |
| Y | 6 |   | ✓  | 2 |   |    |   |    |
| R | 7 |   |    | 1 |   |    |   |    |

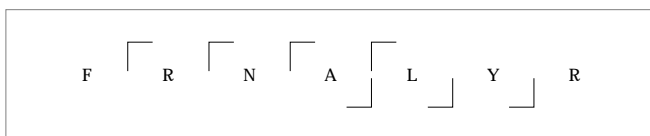

dbValid true RNSESIR PHOS(2) 2. 512. -0.803203 5.1672 100. ? 1926.  
 S\_Acido\_new%gi|68567929|gb|AAY80858.1| RNSESIR%:::PHOS::PHOS::%sample\_2%cmpd\_623

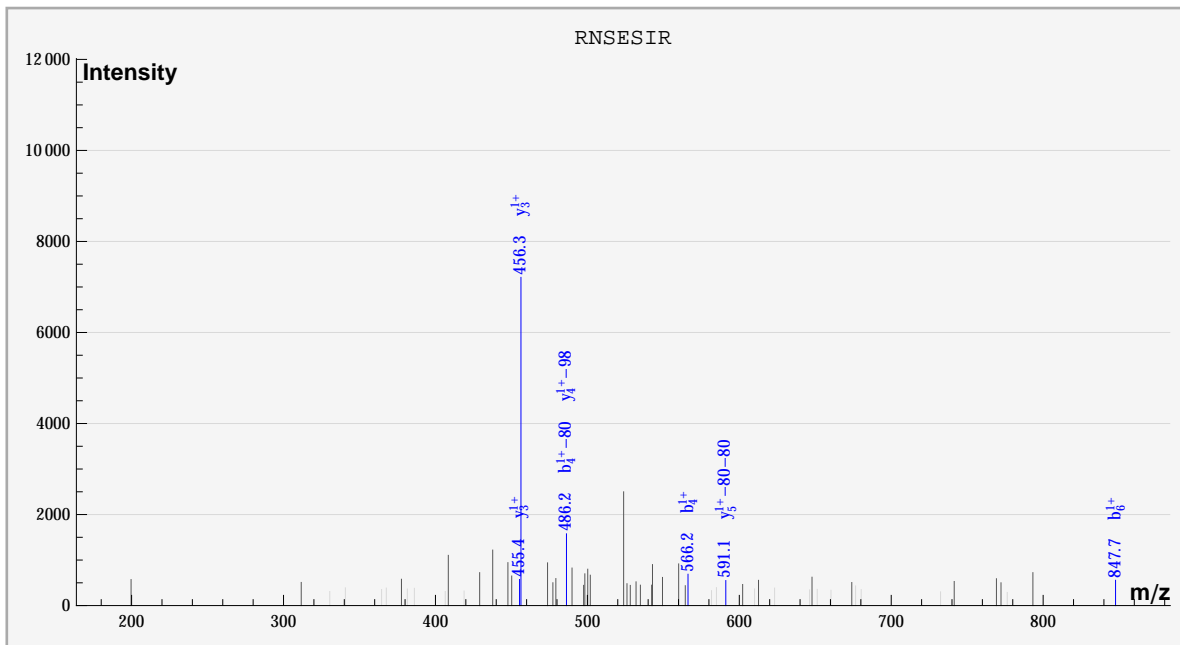

|   | # | b | b* | # | y | y* | P | P* |
|---|---|---|----|---|---|----|---|----|
| R | 1 |   |    |   |   |    |   |    |
| N | 2 |   |    | 6 |   |    |   |    |
| S | 3 |   |    | 5 |   | ✓  |   |    |
| E | 4 | ✓ | ✓  | 4 |   | ✓  |   |    |
| S | 5 |   |    | 3 | ✓ |    |   |    |
| I | 6 | ✓ |    | 2 |   |    |   |    |
| R | 7 |   |    | 1 |   |    |   |    |

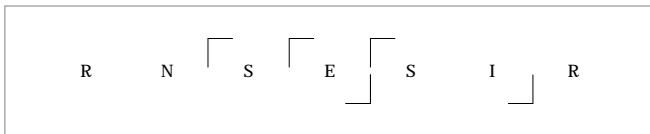

dbValid true RIIIASLR PHOS(1) 2. 512. -0.700483 4.89233 100. ? 1932.

S\_Acido\_new%gi|68568363|gb|AAY81292.1| RIIIASLR%:::::PHOS:::sample\_0%cmpd\_642

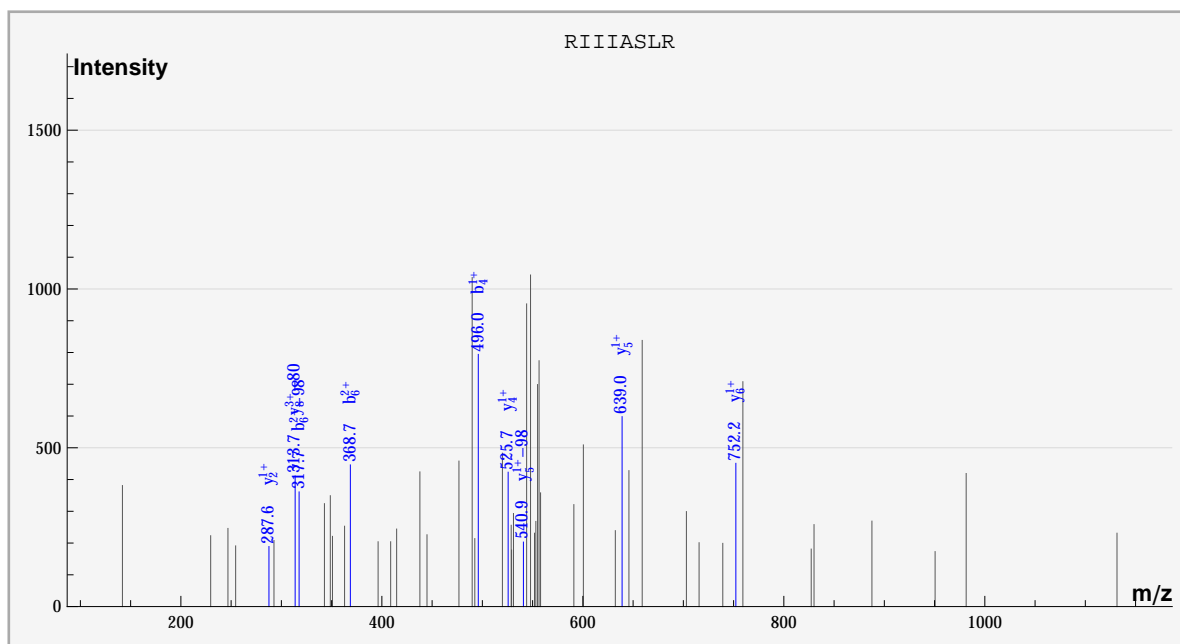

|   | # | b | b* | # | y | y* | P | P* |
|---|---|---|----|---|---|----|---|----|
| R | 1 |   |    |   |   |    |   | ✓  |
| I | 2 |   |    | 7 |   |    |   |    |
| I | 3 |   |    | 6 | ✓ |    |   |    |
| I | 4 | ✓ |    | 5 | ✓ | ✓  |   |    |
| A | 5 |   |    | 4 | ✓ |    |   |    |
| S | 6 | ✓ | ✓  | 3 |   |    |   |    |
| L | 7 |   |    | 2 | ✓ |    |   |    |
| R | 8 |   |    | 1 |   |    |   |    |

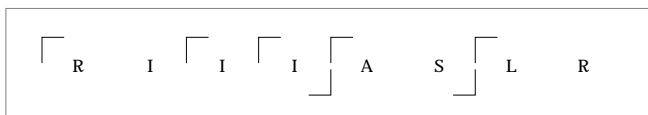



dbValid true QLVETISR PHOS(1) 2. 512. 1.25498 4.97084 100. ? 2064.

S\_Acido\_new%gi|68567122|gb|AAY80051.1| QLVETISR%::::::PHOS::%sample\_0%cmpd\_765

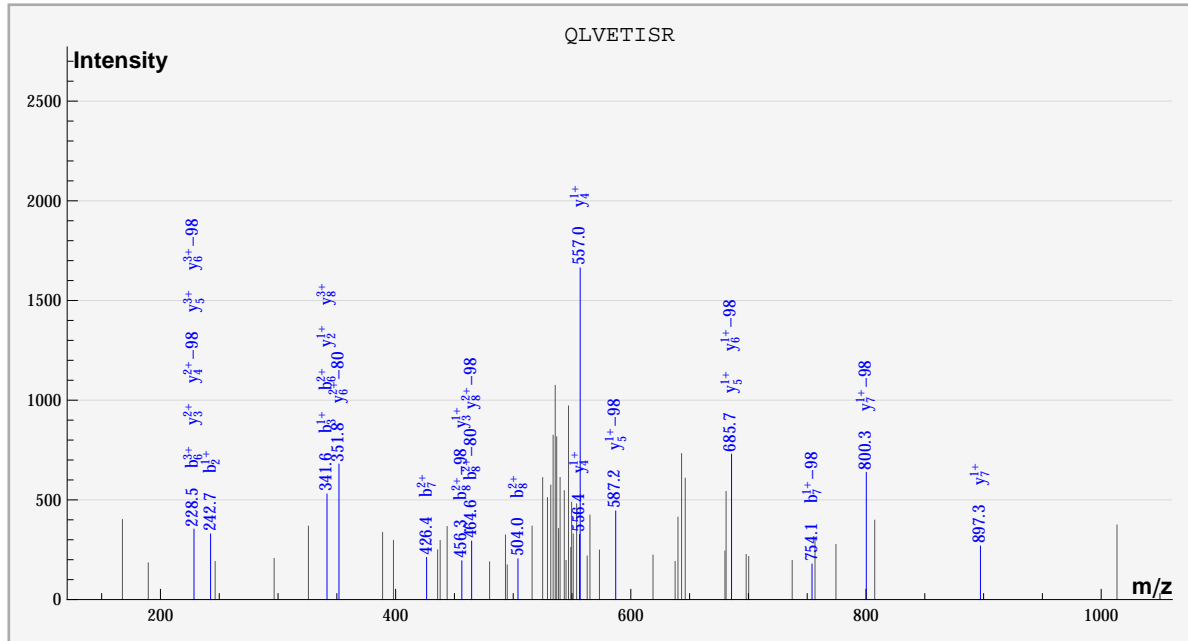

|   | # | b | b* | # | y | y* | P | P* |
|---|---|---|----|---|---|----|---|----|
| Q | 1 |   |    |   |   |    | ✓ | ✓  |
| L | 2 | ✓ |    | 7 | ✓ | ✓  |   |    |
| V | 3 | ✓ |    | 6 |   | ✓  |   |    |
| E | 4 |   |    | 5 | ✓ | ✓  |   |    |
| T | 5 |   |    | 4 | ✓ | ✓  |   |    |
| I | 6 | ✓ |    | 3 | ✓ |    |   |    |
| S | 7 | ✓ | ✓  | 2 | ✓ |    |   |    |
| R | 8 | ✓ | ✓  | 1 |   |    |   |    |

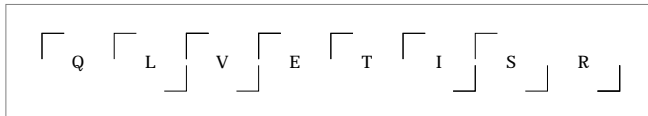

dbValid true YINNTNK PHOS(2) 2. 512. 1.68828 5.21746 100. ? 2268.  
 S\_Acido\_new%gi|68566656|gb|AA79585.1| YINNTNK%:PHOS:::PHOS:::%sample\_2%cmpd\_912

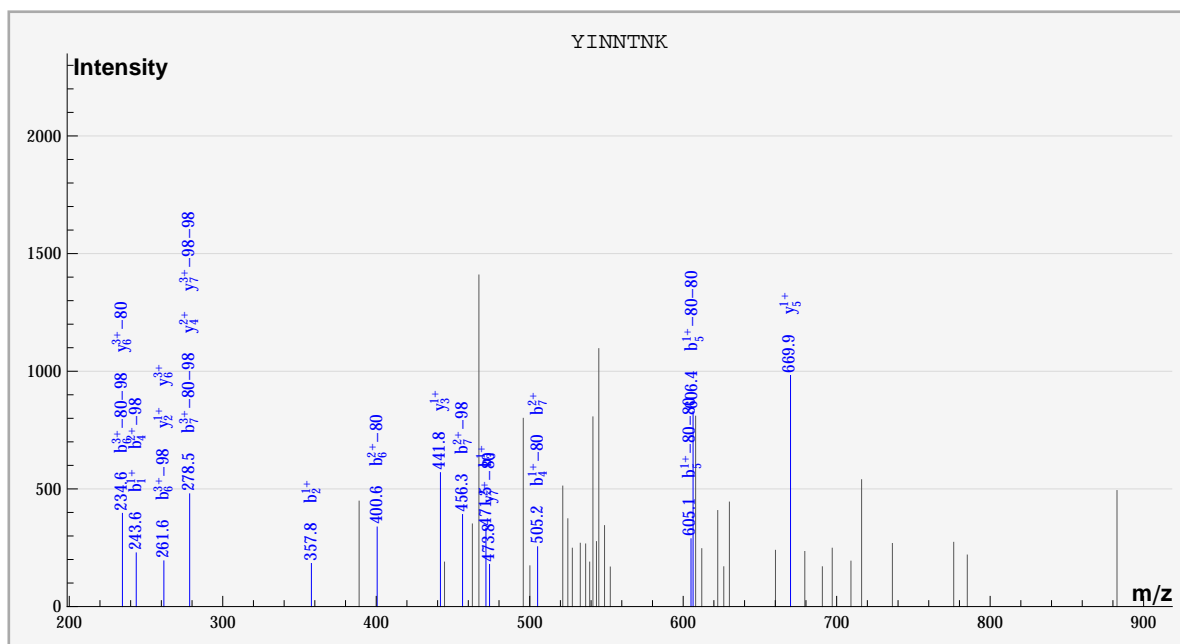

|   | # | b | b* | # | y | y* | P | P* |
|---|---|---|----|---|---|----|---|----|
| Y | 1 | ✓ |    |   |   |    |   | ✓  |
| I | 2 | ✓ |    | 6 | ✓ | ✓  |   |    |
| N | 3 | ✓ |    | 5 | ✓ |    |   |    |
| N | 4 |   | ✓  | 4 | ✓ |    |   |    |
| T | 5 |   | ✓  | 3 | ✓ |    |   |    |
| N | 6 |   | ✓  | 2 | ✓ |    |   |    |
| K | 7 | ✓ | ✓  | 1 |   |    |   |    |

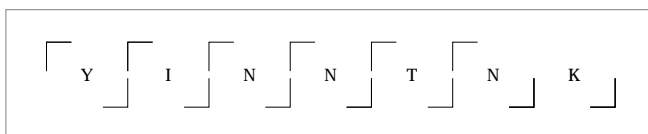

dbValid true RNSESIR PHOS(2) 2. 512. -0.803203 4.91893 100. ? 3486.

S\_Acido\_new%gi|68567929|gb|AAy80858.1| RNSESIR%:::PHOS::PHOS::%sample\_0%cmpd\_2067

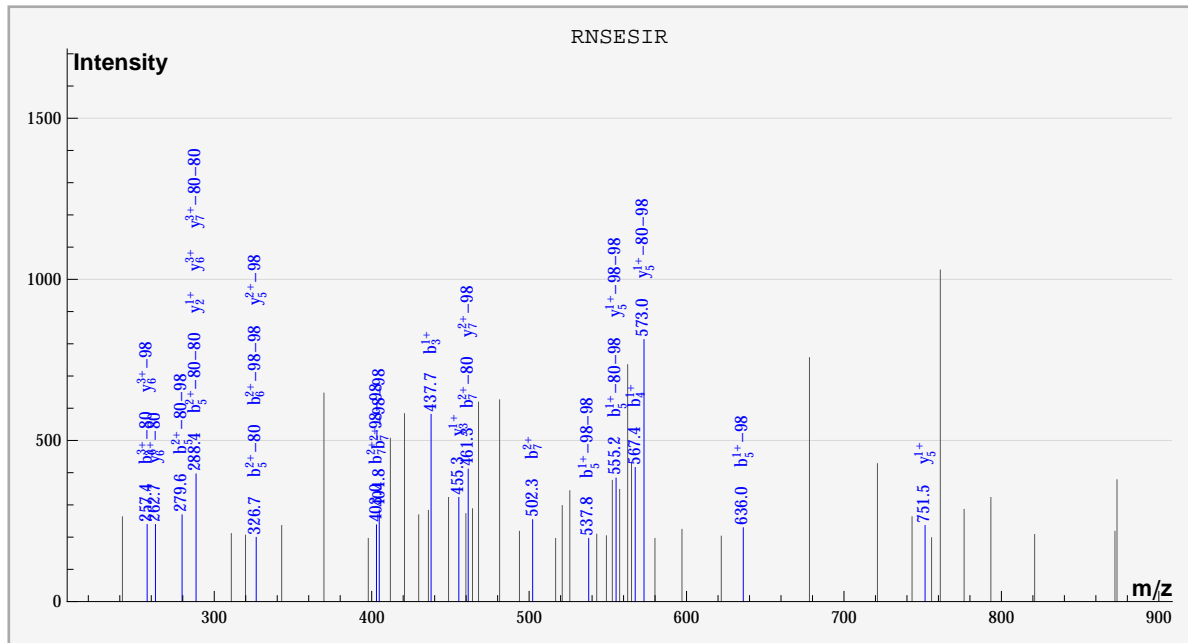

|   | # | b | b* | # | y | y* | P | P* |
|---|---|---|----|---|---|----|---|----|
| R | 1 |   |    |   |   |    |   | ✓  |
| N | 2 |   |    | 6 | ✓ | ✓  |   |    |
| S | 3 | ✓ |    | 5 | ✓ | ✓  |   |    |
| E | 4 | ✓ |    | 4 |   |    |   |    |
| S | 5 |   | ✓  | 3 | ✓ |    |   |    |
| I | 6 |   | ✓  | 2 | ✓ |    |   |    |
| R | 7 | ✓ | ✓  | 1 |   |    |   |    |

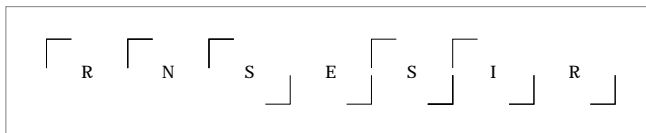



dbValid true MMASASVSK Oxidation\_M(2),PHOS(1) 2. 513. -0.802053 5.40349 100. ? 1662.  
 S\_Acido\_new%gi|68568543|gb|AAY81472.1| MMASASVSK%:Oxidation\_M:Oxidation\_M:::::PHOS::%sample\_1%compd\_382

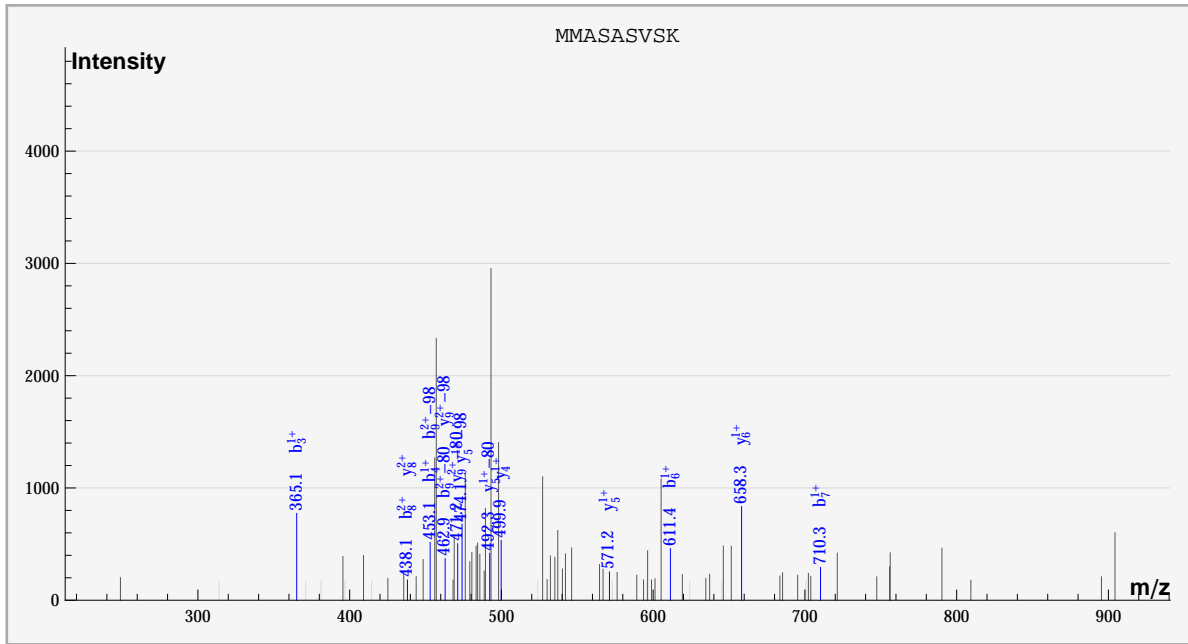

|   | # | b | b* | # | y | y* | P | P* |
|---|---|---|----|---|---|----|---|----|
| M | 1 |   |    |   |   |    |   | ✓  |
| M | 2 |   |    | 8 | ✓ |    |   |    |
| A | 3 | ✓ |    | 7 |   |    |   |    |
| S | 4 | ✓ |    | 6 | ✓ |    |   |    |
| A | 5 |   |    | 5 | ✓ | ✓  |   |    |
| S | 6 | ✓ |    | 4 | ✓ |    |   |    |
| V | 7 | ✓ |    | 3 |   |    |   |    |
| S | 8 | ✓ |    | 2 |   |    |   |    |
| K | 9 |   | ✓  | 1 |   |    |   |    |

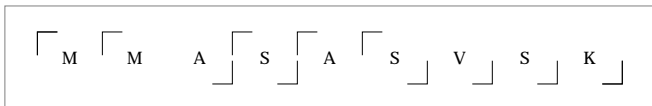

dbValid true AVTLSSGTR PHOS(2) 2. 513. -1.79063 4.95905 100. ? 3642.  
 S\_Acido\_new%gi|68567765|gb|AAy80694.1| AVTLSSGTR%:::PHOS:::PHOS::%sample\_0%compd\_2214

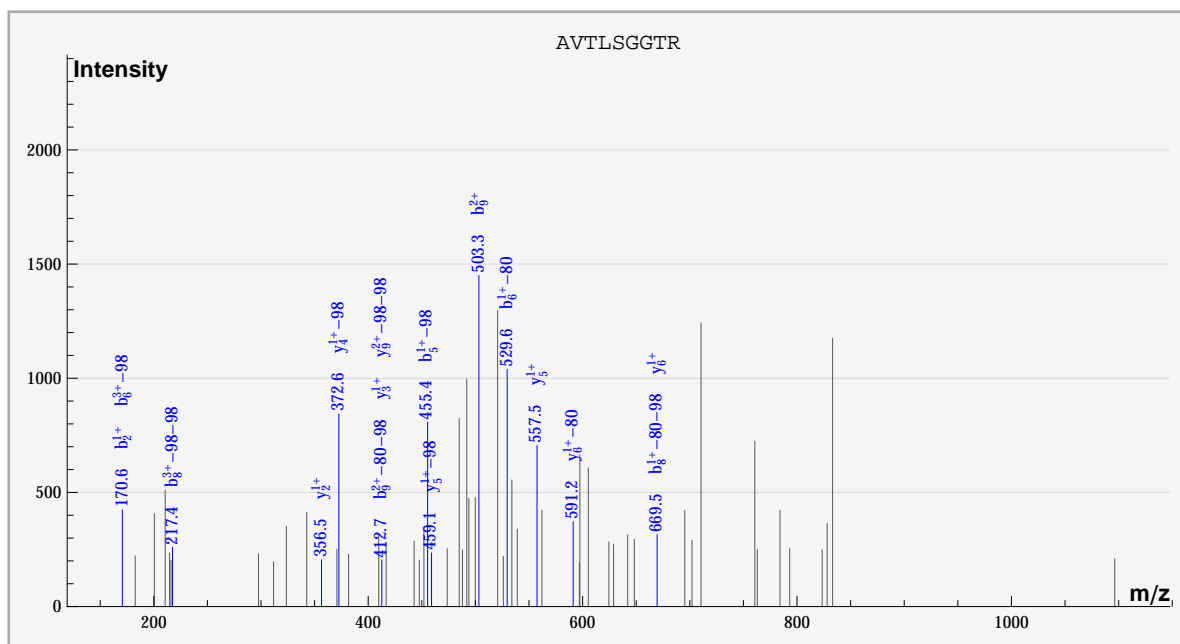

|   | # | b | b* | # | y | y* | P | P* |
|---|---|---|----|---|---|----|---|----|
| A | 1 |   |    |   |   |    |   | ✓  |
| V | 2 | ✓ |    | 8 |   |    |   |    |
| T | 3 |   |    | 7 |   |    |   |    |
| L | 4 |   |    | 6 | ✓ | ✓  |   |    |
| S | 5 |   | ✓  | 5 | ✓ | ✓  |   |    |
| G | 6 |   | ✓  | 4 |   | ✓  |   |    |
| G | 7 |   |    | 3 | ✓ |    |   |    |
| T | 8 |   | ✓  | 2 | ✓ |    |   |    |
| R | 9 | ✓ | ✓  | 1 |   |    |   |    |

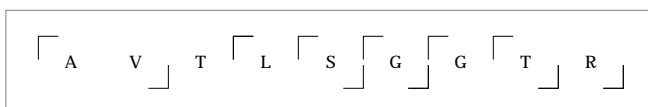

dbConflictWinner true MPQTLTEK PHOS(1) 2. 514. 0.230117 5.48373 100. ? 2760.  
 S\_Acido\_new%gi|68566741|gb|AAY79670.1| MPQTLTEK%:::PHOS:::sample\_0%compd\_1407

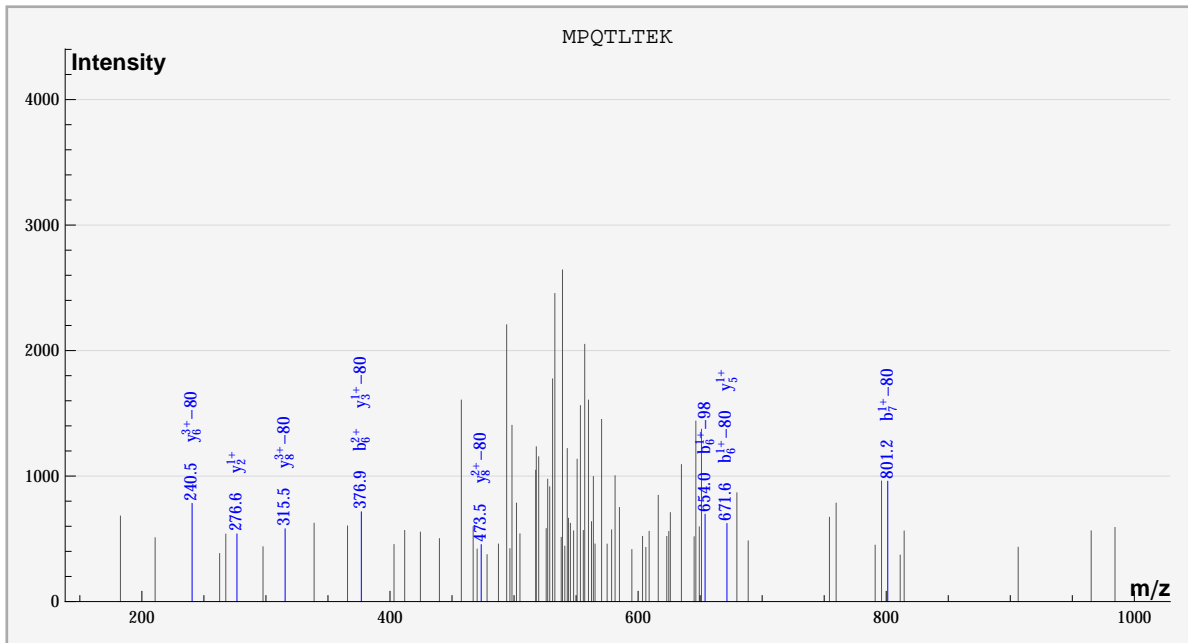

|   | # | b | b* | # | y | y* | P | P* |
|---|---|---|----|---|---|----|---|----|
| M | 1 |   |    |   |   |    |   | ✓  |
| P | 2 |   |    | 7 |   |    |   |    |
| Q | 3 |   |    | 6 |   | ✓  |   |    |
| T | 4 |   |    | 5 | ✓ |    |   |    |
| L | 5 |   |    | 4 |   |    |   |    |
| T | 6 | ✓ | ✓  | 3 |   | ✓  |   |    |
| E | 7 |   | ✓  | 2 | ✓ |    |   |    |
| K | 8 |   |    | 1 |   |    |   |    |

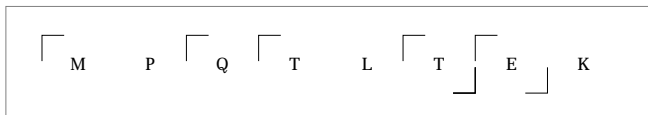

dbValid true YSHGTSHR PHOS(1) 2. 514. -1.29655 5.63595 100. ? 3012.  
 S\_Acido\_new%gi|68567055|gb|AAY79984.1| YSHGTSHR%:PHOS:.....%sample\_2%cmpd\_1627

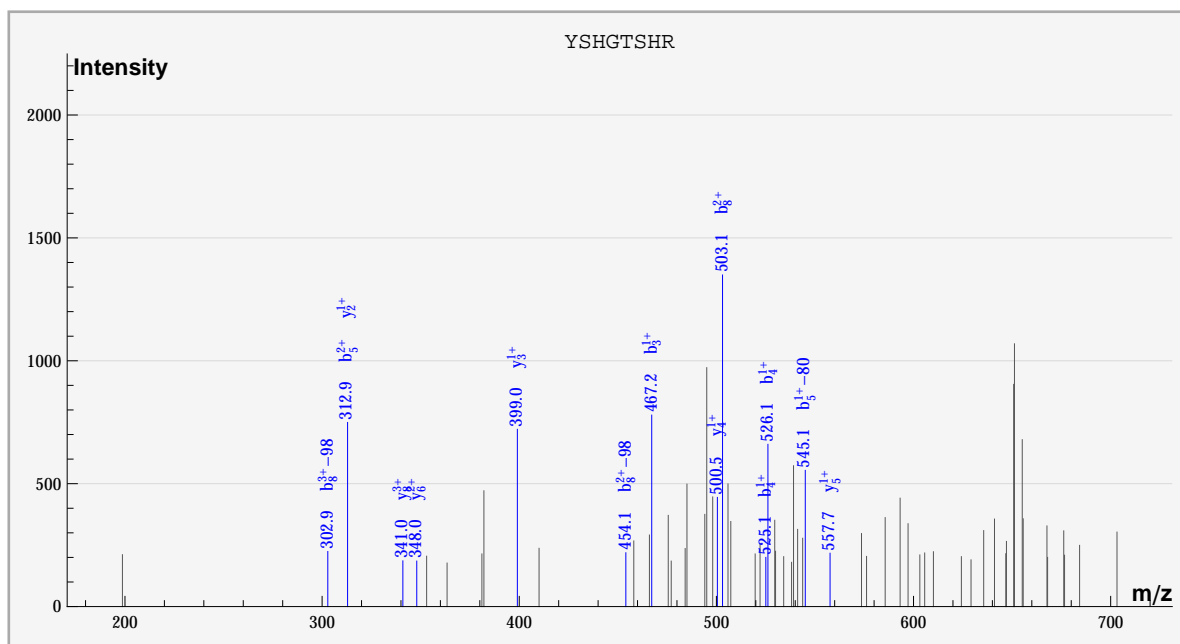

|   | # | b | b* | # | y | y* | P | P* |
|---|---|---|----|---|---|----|---|----|
| Y | 1 |   |    |   |   |    |   | ✓  |
| S | 2 |   |    | 7 |   |    |   |    |
| H | 3 | ✓ |    | 6 | ✓ |    |   |    |
| G | 4 | ✓ |    | 5 | ✓ |    |   |    |
| T | 5 | ✓ | ✓  | 4 | ✓ |    |   |    |
| S | 6 |   |    | 3 | ✓ |    |   |    |
| H | 7 |   |    | 2 | ✓ |    |   |    |
| R | 8 | ✓ | ✓  | 1 |   |    |   |    |

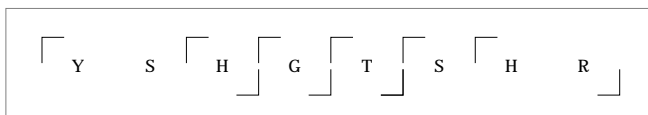



dbValid true NSVIAVVDK PHOS(1) 2. 514. -1.24265 4.96282 100. ? 3126.  
 S\_Acido\_new%gi|68567119|gb|AAY80048.1| NSVIAVVDK%::PHOS:::sample\_0%compd\_1738

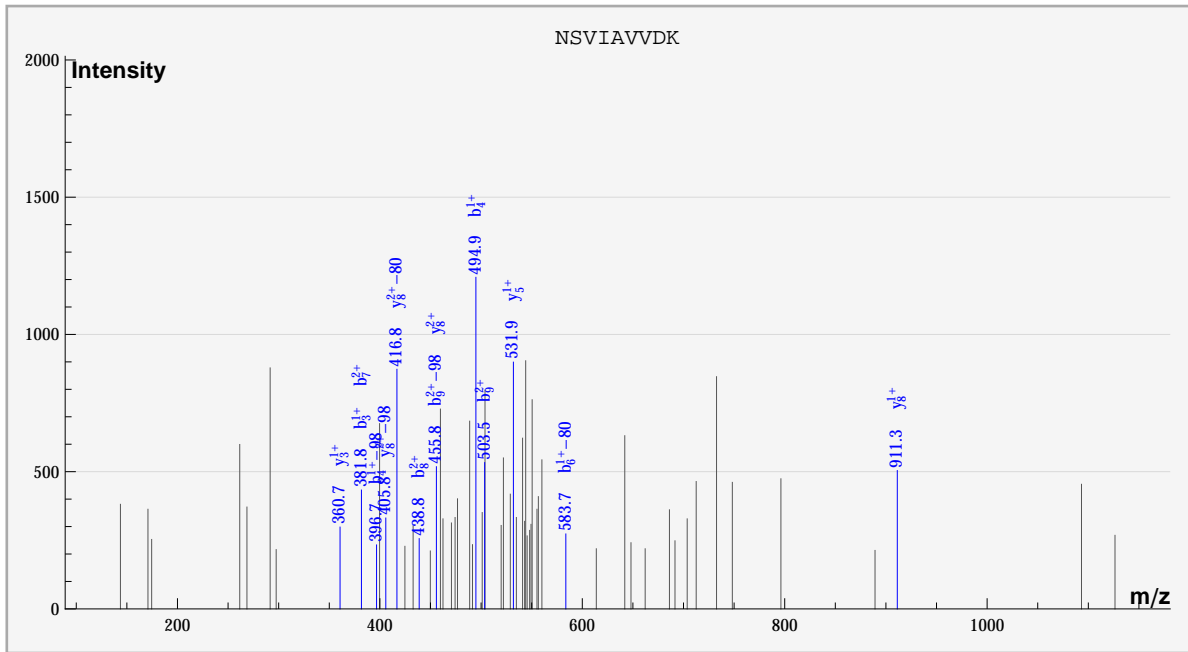

|   | # | b | b* | # | y | y* | P | P* |
|---|---|---|----|---|---|----|---|----|
| N | 1 |   |    |   |   |    |   |    |
| S | 2 |   |    | 8 | ✓ | ✓  |   |    |
| V | 3 | ✓ |    | 7 |   |    |   |    |
| I | 4 | ✓ | ✓  | 6 |   |    |   |    |
| A | 5 |   |    | 5 | ✓ |    |   |    |
| V | 6 |   | ✓  | 4 |   |    |   |    |
| V | 7 | ✓ |    | 3 | ✓ |    |   |    |
| D | 8 | ✓ |    | 2 |   |    |   |    |
| K | 9 | ✓ | ✓  | 1 |   |    |   |    |

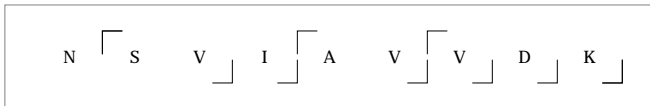

dbValid true YSHGTSHR PHOS(1) 2. 514. -1.29655 5.38415 100. ? 3144.  
 S\_Acido\_new%gi|68567055|gb|AAY79984.1| YSHGTSHR%:PHOS::::::%sample\_2%cmpd\_1742

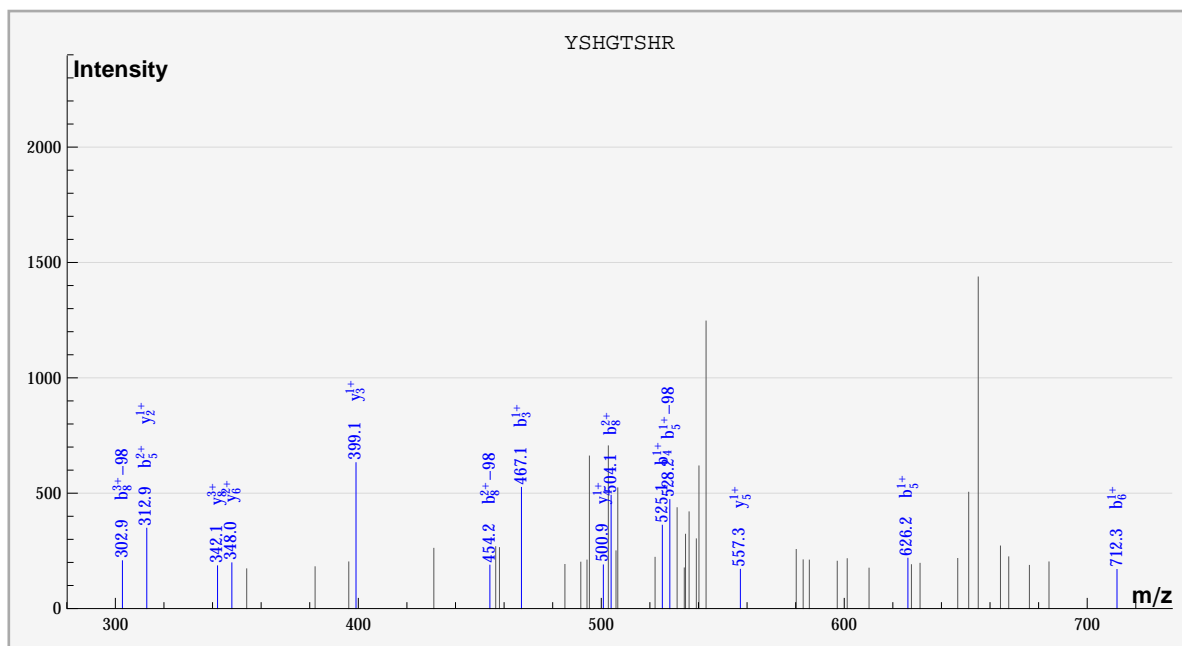

|   | # | b | b* | # | y | y* | P | P* |
|---|---|---|----|---|---|----|---|----|
| Y | 1 |   |    |   |   |    |   | ✓  |
| S | 2 |   |    | 7 |   |    |   |    |
| H | 3 | ✓ |    | 6 | ✓ |    |   |    |
| G | 4 | ✓ |    | 5 | ✓ |    |   |    |
| T | 5 | ✓ | ✓  | 4 | ✓ |    |   |    |
| S | 6 | ✓ |    | 3 | ✓ |    |   |    |
| H | 7 |   |    | 2 | ✓ |    |   |    |
| R | 8 | ✓ | ✓  | 1 |   |    |   |    |

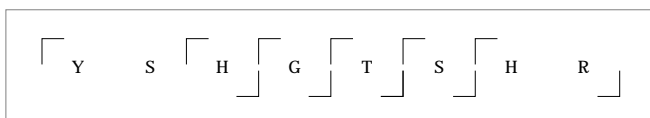

dbValid true QLVETISR PHOS(1) 2. 514. -0.745023 5.10029 100. ? 3426.

S\_Acido\_new%gi|68567122|gb|AAY80051.1| QLVETISR%::::::PHOS::%sample\_0%cmpd\_2014

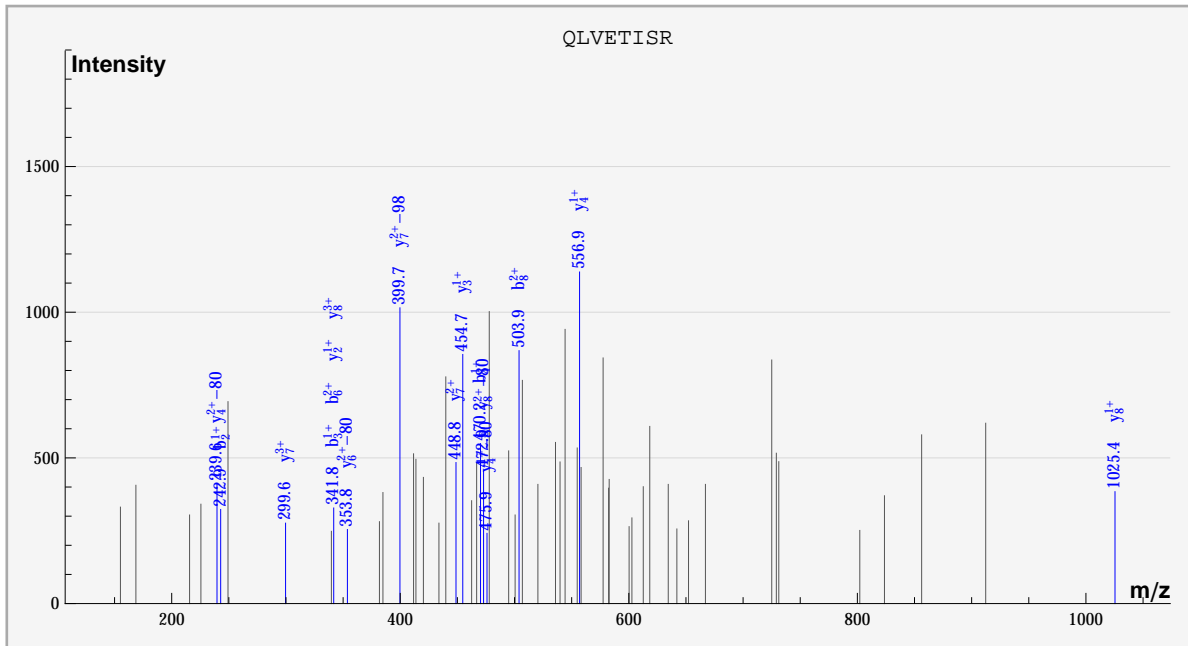

|   | # | b | b* | # | y | y* | P | P* |
|---|---|---|----|---|---|----|---|----|
| Q | 1 |   |    |   |   |    | ✓ | ✓  |
| L | 2 | ✓ |    | 7 | ✓ | ✓  |   |    |
| V | 3 | ✓ |    | 6 |   | ✓  |   |    |
| E | 4 | ✓ |    | 5 |   |    |   |    |
| T | 5 |   |    | 4 | ✓ | ✓  |   |    |
| I | 6 | ✓ |    | 3 | ✓ |    |   |    |
| S | 7 |   |    | 2 | ✓ |    |   |    |
| R | 8 | ✓ |    | 1 |   |    |   |    |

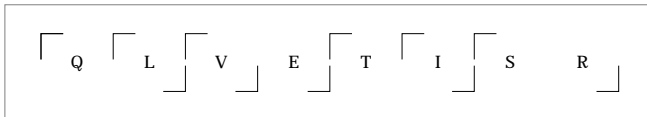

dbValid true ELVIDVTR PHOS(1) 2. 514. -1.24265 5.20118 100. ? 4482.  
 S\_Acido\_new%gi|68567894|gb|AAY80823.1| ELVIDVTR%::::::PHOS::%sample\_0%compd\_2989

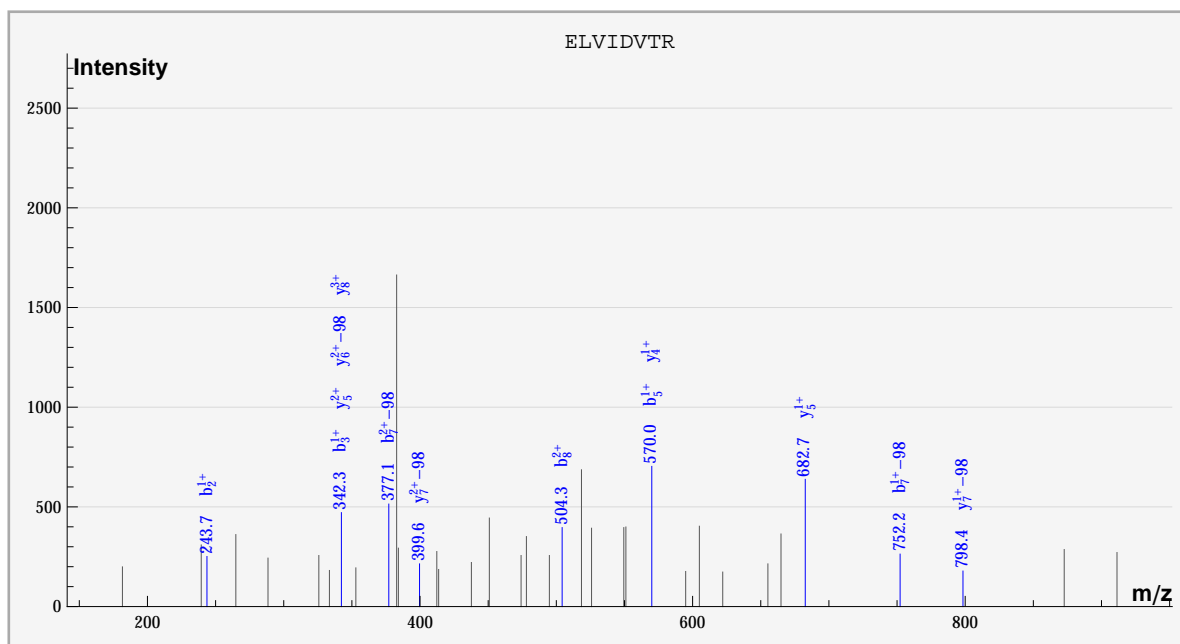

|   | # | b | b* | # | y | y* | P | P* |
|---|---|---|----|---|---|----|---|----|
| E | 1 |   |    |   |   |    |   | ✓  |
| L | 2 | ✓ |    | 7 |   | ✓  |   |    |
| V | 3 | ✓ |    | 6 |   | ✓  |   |    |
| I | 4 |   |    | 5 | ✓ |    |   |    |
| D | 5 | ✓ |    | 4 | ✓ |    |   |    |
| V | 6 |   |    | 3 |   |    |   |    |
| T | 7 |   | ✓  | 2 |   |    |   |    |
| R | 8 | ✓ |    | 1 |   |    |   |    |

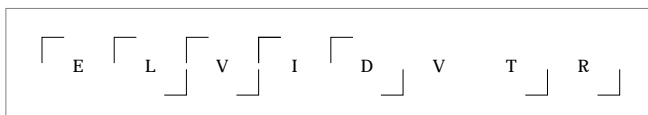

dbValid true IIFIGYPK PHOS(1) 2. 515. 0.772267 4.95283 100. ? 1464.

S\_Acido\_new%gi|68567947|gb|AAY80876.1| IIFIGYPK%:::::PHOS:::sample\_1%compd\_212

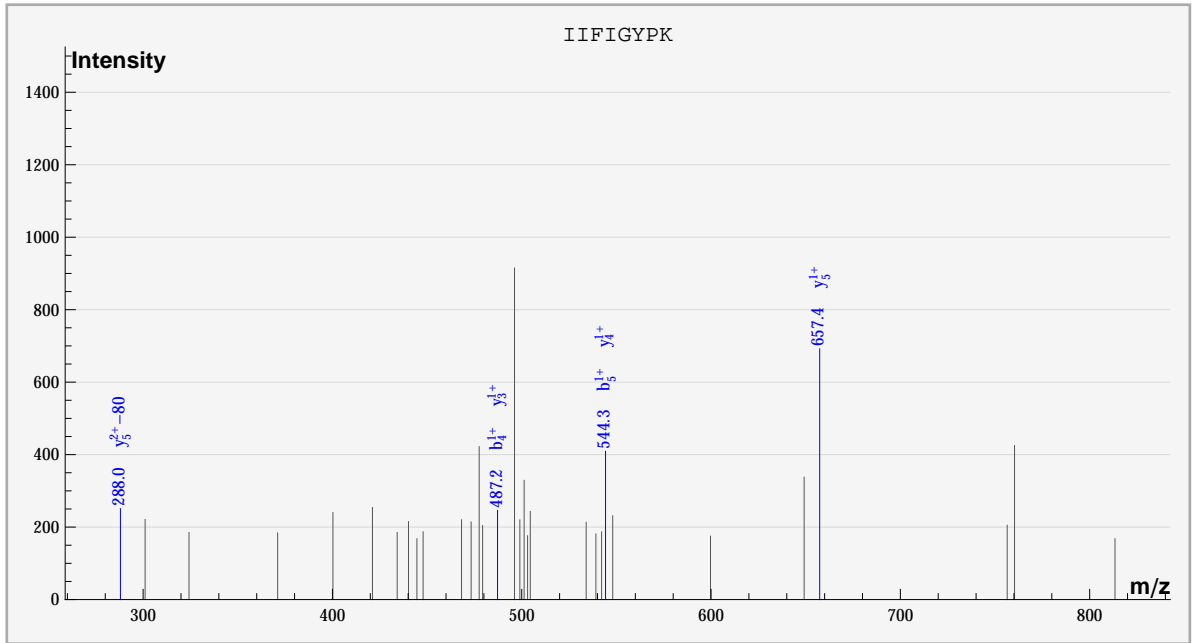

|   | # | b | b* | # | y | y* | P | P* |
|---|---|---|----|---|---|----|---|----|
| I | 1 |   |    |   |   |    |   |    |
| I | 2 |   |    | 7 |   |    |   |    |
| F | 3 |   |    | 6 |   |    |   |    |
| I | 4 | ✓ |    | 5 | ✓ | ✓  |   |    |
| G | 5 | ✓ |    | 4 | ✓ |    |   |    |
| Y | 6 |   |    | 3 | ✓ |    |   |    |
| P | 7 |   |    | 2 |   |    |   |    |
| K | 8 |   |    | 1 |   |    |   |    |

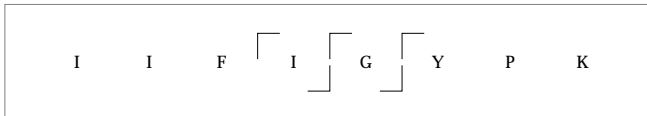

dbValid true IIFIGYPK PHOS(1) 2. 515. 0.772267 5.11039 100. ? 1560.

S\_Acido\_new%gi|68567947|gb|AAY80876.1| IIFIGYPK%:::PHOS:::sample\_1%compd\_292

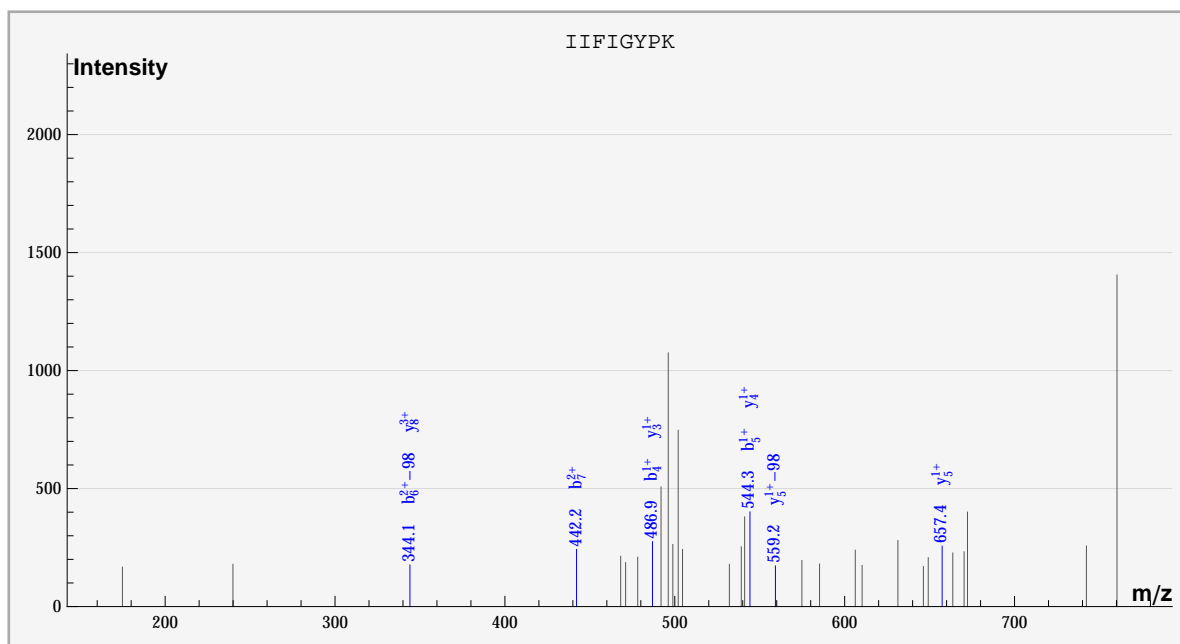

|   | # | b | b* | # | y | y* | P | P* |
|---|---|---|----|---|---|----|---|----|
| I | 1 |   |    |   |   |    |   | ✓  |
| I | 2 |   |    | 7 |   |    |   |    |
| F | 3 |   |    | 6 |   |    |   |    |
| I | 4 | ✓ |    | 5 | ✓ | ✓  |   |    |
| G | 5 | ✓ |    | 4 | ✓ |    |   |    |
| Y | 6 |   | ✓  | 3 | ✓ |    |   |    |
| P | 7 | ✓ |    | 2 |   |    |   |    |
| K | 8 |   |    | 1 |   |    |   |    |

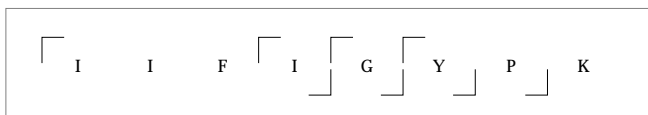

dbValid true FNNPSTTS PHOS(2) 2. 515. -0.837908 5.07237 100. ? 1734.  
 S\_Acido\_new%gil68567744|gb|AAY80673.1| FNNPSTTS%:::::::PHOS:PHOS:%sample\_2%cmpd\_488

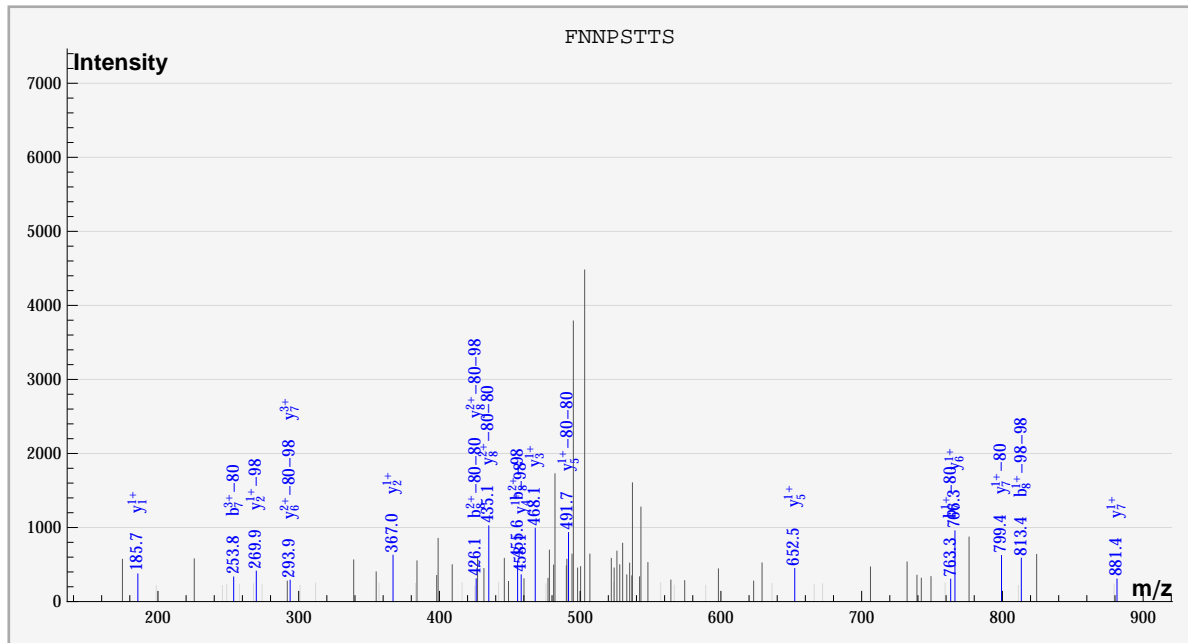

|   | # | b | b* | # | y | y* | P | P* |
|---|---|---|----|---|---|----|---|----|
| F | 1 |   |    |   |   |    |   | ✓  |
| N | 2 |   |    | 7 | ✓ | ✓  |   |    |
| N | 3 |   |    | 6 | ✓ | ✓  |   |    |
| P | 4 |   |    | 5 | ✓ | ✓  |   |    |
| S | 5 |   |    | 4 |   | ✓  |   |    |
| T | 6 |   |    | 3 | ✓ |    |   |    |
| T | 7 | ✓ |    | 2 | ✓ | ✓  |   |    |
| S | 8 | ✓ |    | 1 | ✓ |    |   |    |

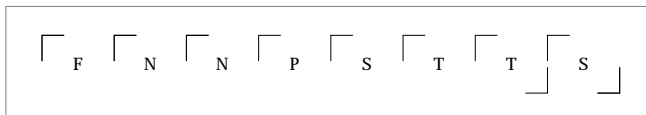

dbValid true KYAEEANK PHOS(1) 2. 515. 1.72351 4.95281 100. ? 1980.  
 S\_Acido\_new%gi68567283|gb|AAY80212.1| KYAEEANK%::PHOS:::::%sample\_0%cmpd\_690

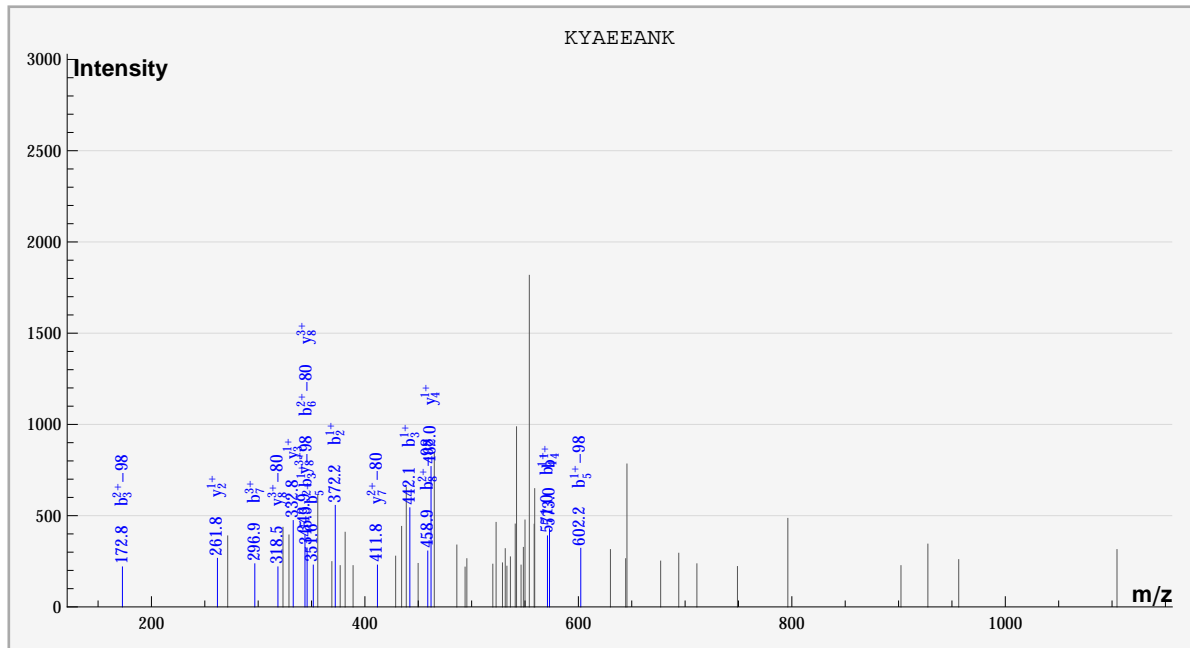

|   | # | b | b* | # | y | y* | P | P* |
|---|---|---|----|---|---|----|---|----|
| K | 1 |   |    |   |   |    | ✓ | ✓  |
| Y | 2 | ✓ |    | 7 |   | ✓  |   |    |
| A | 3 | ✓ | ✓  | 6 |   |    |   |    |
| E | 4 | ✓ |    | 5 |   |    |   |    |
| E | 5 | ✓ | ✓  | 4 |   | ✓  |   |    |
| A | 6 |   | ✓  | 3 |   | ✓  |   |    |
| N | 7 | ✓ |    | 2 |   | ✓  |   |    |
| K | 8 |   | ✓  | 1 |   |    |   |    |

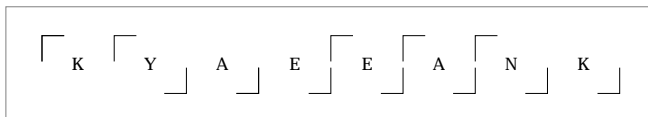



dbValid true YINNTNK PHOS(2) 2. 515. -1.31172 5.0371 100. ? 2364.  
 S\_Acido\_new%gii68566656|gb|AAY79585.1| YINNTNK%:PHOS:::PHOS:::sample\_2%cmpd\_1051

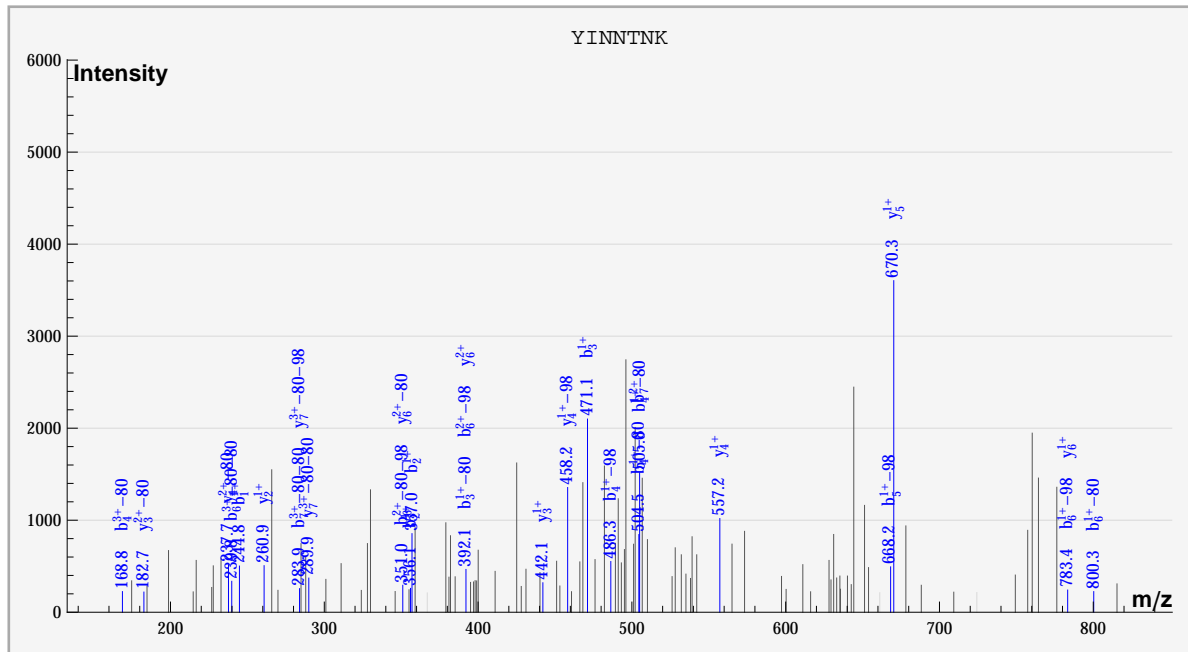

|   | # | b | b* | # | y | y* | P | P* |
|---|---|---|----|---|---|----|---|----|
| Y | 1 | ✓ |    |   |   |    |   | ✓  |
| I | 2 | ✓ |    | 6 | ✓ | ✓  |   |    |
| N | 3 | ✓ | ✓  | 5 | ✓ |    |   |    |
| N | 4 | ✓ | ✓  | 4 | ✓ | ✓  |   |    |
| T | 5 | ✓ | ✓  | 3 | ✓ | ✓  |   |    |
| N | 6 | ✓ | ✓  | 2 | ✓ |    |   |    |
| K | 7 | ✓ | ✓  | 1 |   |    |   |    |

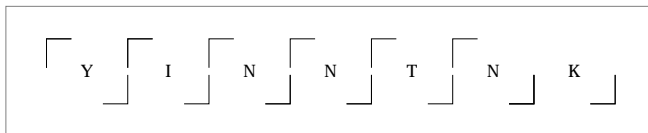



dbValid true YNSTLIR PHOS(2) 2. 515. -1.29353 5.01802 100. ? 2496.  
 S\_Acido\_new%gi|68567170|gb|AAy80099.1| YNSTLIR%:PHOS::PHOS:::sample\_2%cmpd\_1168

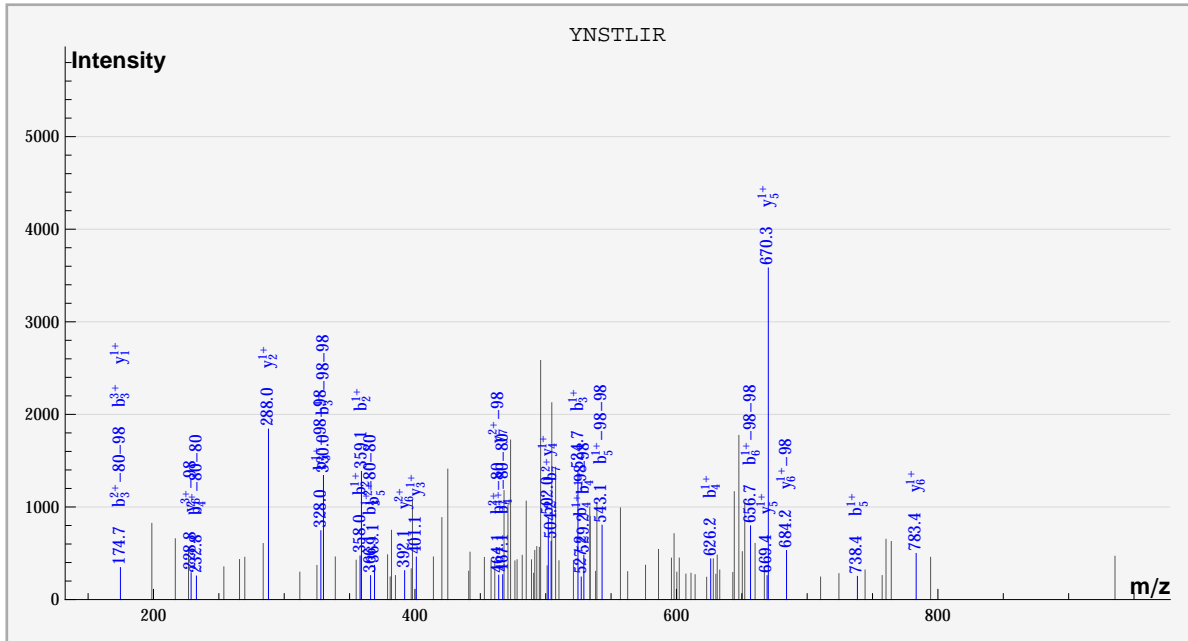

|   | # | b | b* | # | y | y* | P | P* |
|---|---|---|----|---|---|----|---|----|
| Y | 1 |   |    |   |   |    |   | ✓  |
| N | 2 | ✓ |    | 6 | ✓ | ✓  |   |    |
| S | 3 | ✓ | ✓  | 5 | ✓ |    |   |    |
| T | 4 | ✓ | ✓  | 4 | ✓ |    |   |    |
| L | 5 | ✓ | ✓  | 3 | ✓ |    |   |    |
| I | 6 |   | ✓  | 2 | ✓ |    |   |    |
| R | 7 | ✓ | ✓  | 1 | ✓ |    |   |    |

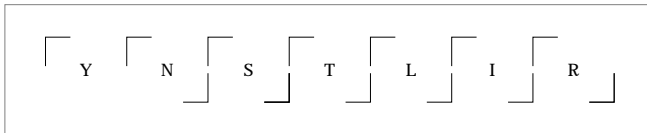

dbValid true YINNTNK PHOS(2) 2. 515. -1.31172 4.92464 100. ? 3078.  
 S\_Acido\_new%gi|68566656|gb|AA79585.1| YINNTNK%:PHOS:::PHOS:::sample\_0%compd\_1695

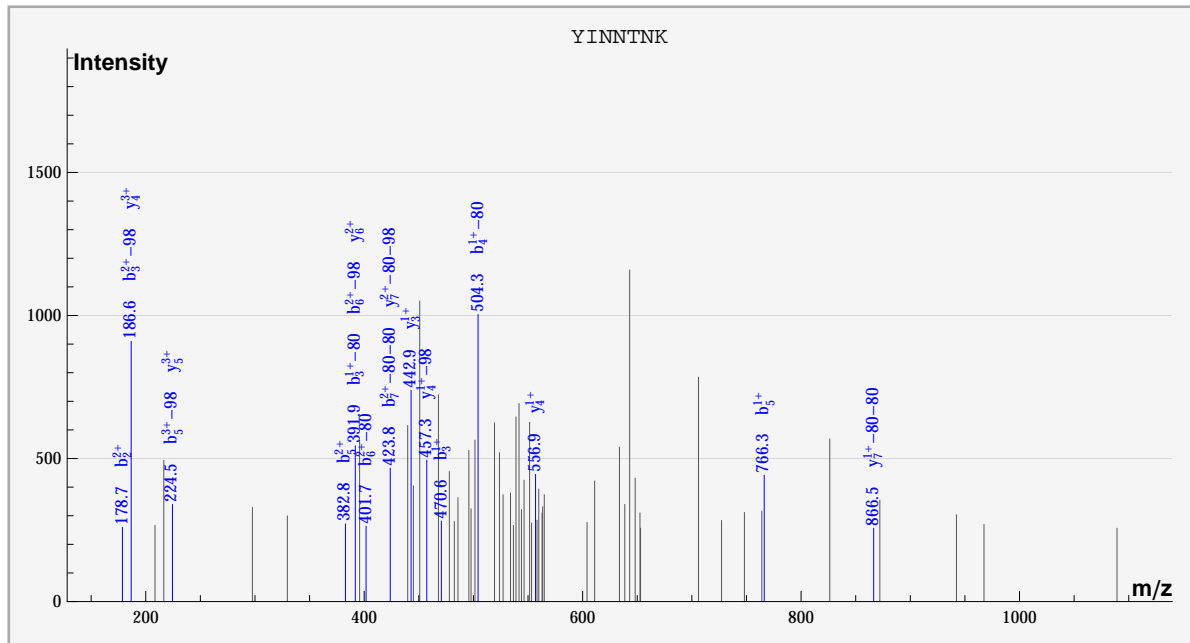

|   | # | b | b* | # | y | y* | P | P* |
|---|---|---|----|---|---|----|---|----|
| Y | 1 |   |    |   |   |    |   | ✓  |
| I | 2 | ✓ |    | 6 | ✓ |    |   |    |
| N | 3 | ✓ | ✓  | 5 | ✓ |    |   |    |
| N | 4 |   | ✓  | 4 | ✓ | ✓  |   |    |
| T | 5 | ✓ | ✓  | 3 | ✓ |    |   |    |
| N | 6 |   | ✓  | 2 |   |    |   |    |
| K | 7 |   | ✓  | 1 |   |    |   |    |

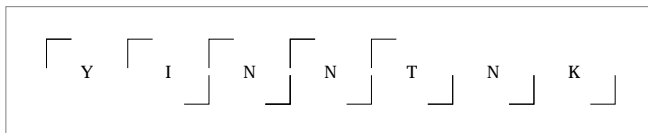

dbValid true YFISLFR PHOS(1) 2. 515. -1.75358 5.14394 100. ? 3714.  
 S\_Acido\_new%gi|68566710|gb|AAY79639.1| YFISLFR%:PHOS::::::%sample\_0%cmpd\_2282

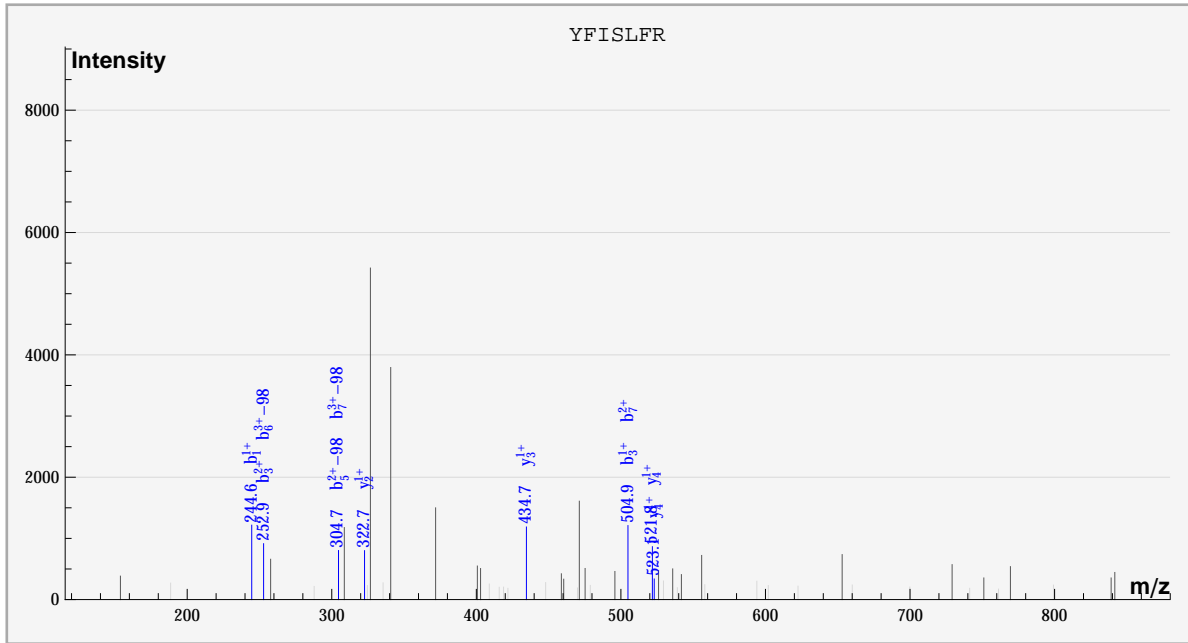

|   | # | b | b* | # | y | y* | P | P* |
|---|---|---|----|---|---|----|---|----|
| Y | 1 | ✓ |    |   |   |    |   |    |
| F | 2 |   |    | 6 |   |    |   |    |
| I | 3 | ✓ |    | 5 |   |    |   |    |
| S | 4 |   |    | 4 | ✓ |    |   |    |
| L | 5 |   | ✓  | 3 | ✓ |    |   |    |
| F | 6 |   | ✓  | 2 | ✓ |    |   |    |
| R | 7 | ✓ | ✓  | 1 |   |    |   |    |

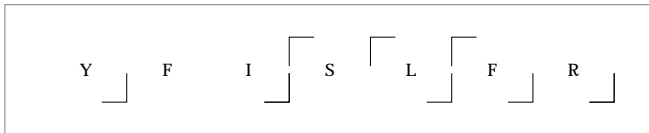

dbValid true DQLDVVTR PHOS(1) 2. 515. -1.76322 4.98147 100. ? 3894.  
 S\_Acido\_new%gi|68568245|gb|AA81174.1| DQLDVVTR%:::::PHOS::%sample\_0%compd\_2448

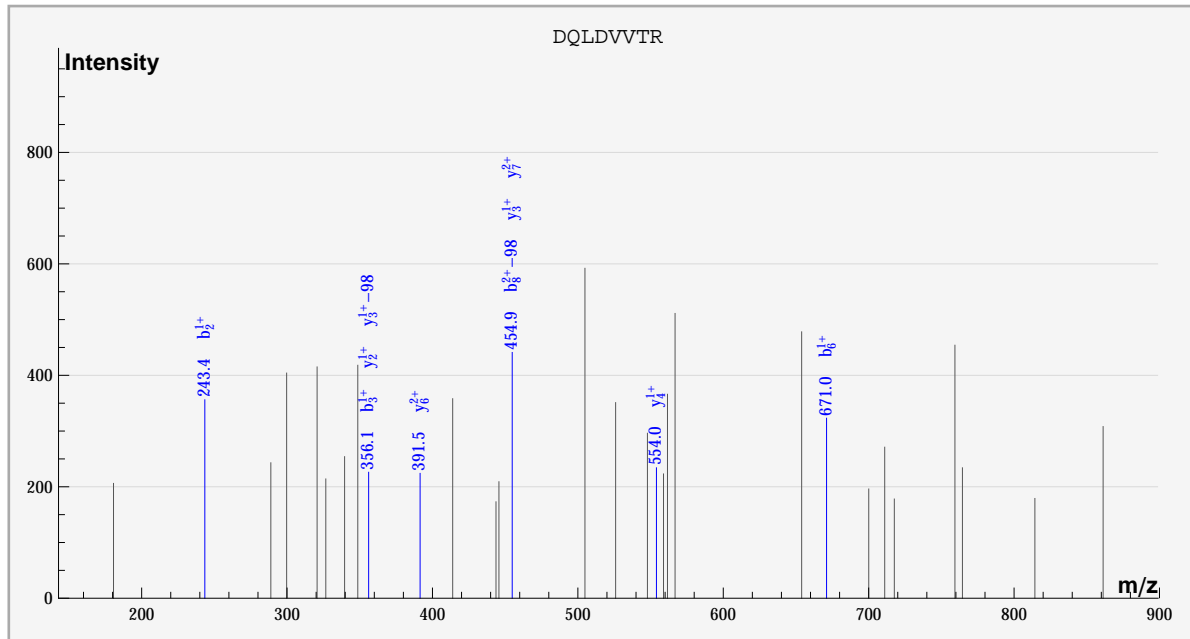

|   | # | b | b* | # | y | y* | P | P* |
|---|---|---|----|---|---|----|---|----|
| D | 1 |   |    |   |   |    |   |    |
| Q | 2 | ✓ |    | 7 | ✓ |    |   |    |
| L | 3 | ✓ |    | 6 | ✓ |    |   |    |
| D | 4 |   |    | 5 |   |    |   |    |
| V | 5 |   |    | 4 | ✓ |    |   |    |
| V | 6 | ✓ |    | 3 | ✓ | ✓  |   |    |
| T | 7 |   |    | 2 | ✓ |    |   |    |
| R | 8 |   | ✓  | 1 |   |    |   |    |

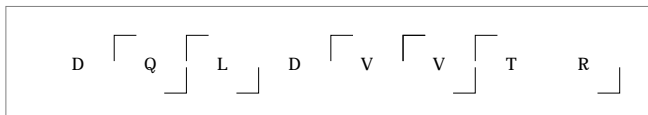

dbValid true YDGPVIRK PHOS(1) 2. 515. -0.747768 5.15414 100. ? 4074.  
 S\_Acido\_new%gi|68567823|gb|AAY80752.1| YDGPVIRK%:PHOS:.....%sample\_0%compd\_2613

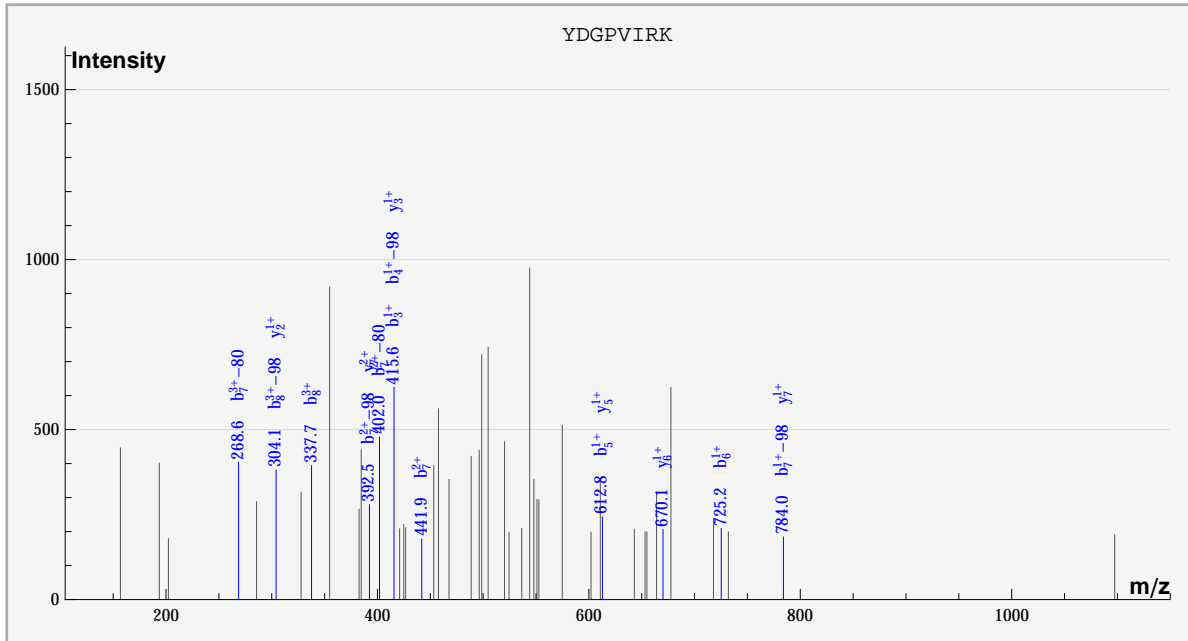

|   | # | b | b* | # | y | y* | P | P* |
|---|---|---|----|---|---|----|---|----|
| Y | 1 |   |    |   |   |    |   |    |
| D | 2 |   |    | 7 | ✓ |    |   |    |
| G | 3 | ✓ |    | 6 | ✓ |    |   |    |
| P | 4 |   | ✓  | 5 | ✓ |    |   |    |
| V | 5 | ✓ |    | 4 |   |    |   |    |
| I | 6 | ✓ |    | 3 | ✓ |    |   |    |
| R | 7 | ✓ | ✓  | 2 | ✓ |    |   |    |
| K | 8 | ✓ | ✓  | 1 |   |    |   |    |

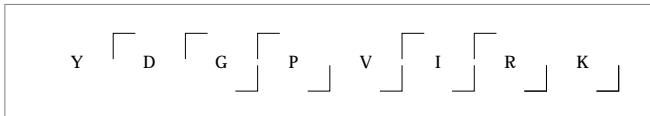

dbValid true IDKITTTR PHOS(1) 2. 516. -1.7372 4.87861 100. ? 2136.  
 S\_Acido\_new%gi|68568702|gb|AAY81631.1| IDKITTTR%::::::PHOS::%sample\_0%cmpd\_834

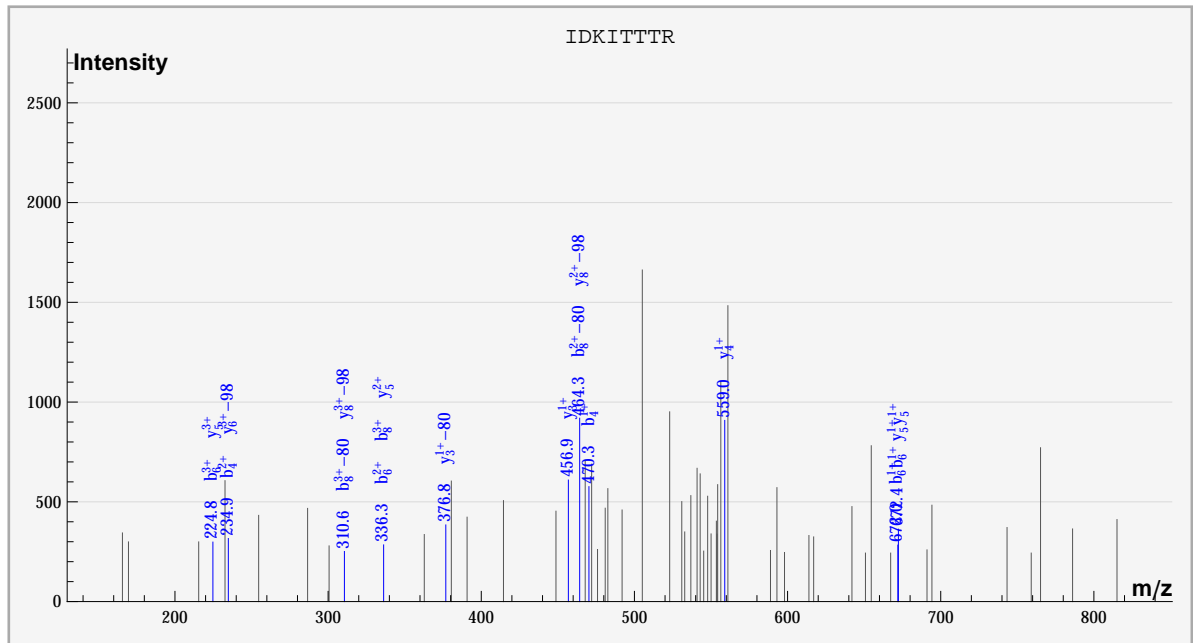

|   | # | b | b* | # | y | y* | P | P* |
|---|---|---|----|---|---|----|---|----|
| I | 1 |   |    |   |   |    |   | ✓  |
| D | 2 |   |    | 7 |   |    |   |    |
| K | 3 |   |    | 6 |   | ✓  |   |    |
| I | 4 | ✓ |    | 5 | ✓ |    |   |    |
| T | 5 |   |    | 4 | ✓ |    |   |    |
| T | 6 | ✓ |    | 3 | ✓ | ✓  |   |    |
| T | 7 |   |    | 2 |   |    |   |    |
| R | 8 | ✓ | ✓  | 1 |   |    |   |    |

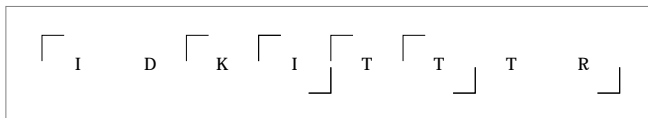



dbValid true ESYLGGTK PHOS(1) 2. 516. 0.225882 5.70442 100. ? 2292.  
 S\_Acido\_new%gi|68566815|gb|AAY79744.1| ESYLGGTK%::::::PHOS:::sample\_0%cmpd\_978

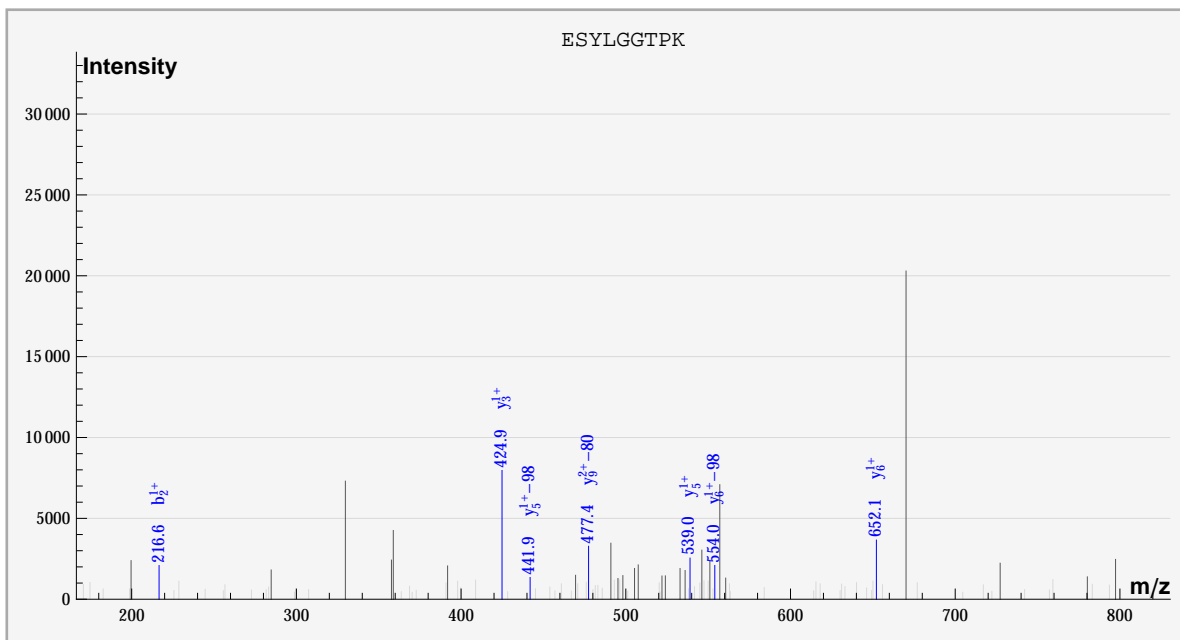

|   | # | b | b* | # | y | y* | P | P* |
|---|---|---|----|---|---|----|---|----|
| E | 1 |   |    |   |   |    |   | ✓  |
| S | 2 | ✓ |    | 8 |   |    |   |    |
| Y | 3 |   |    | 7 |   |    |   |    |
| L | 4 |   |    | 6 | ✓ | ✓  |   |    |
| G | 5 |   |    | 5 | ✓ | ✓  |   |    |
| G | 6 |   |    | 4 |   |    |   |    |
| T | 7 |   |    | 3 | ✓ |    |   |    |
| P | 8 |   |    | 2 |   |    |   |    |
| K | 9 |   |    | 1 |   |    |   |    |

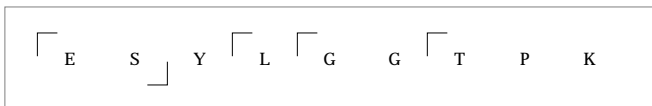

dbValid true IVSTMSSK PHOS(1) 2. 516. 1.2354 5.07333 100. ? 2364.  
 S\_Acido\_new%gi|68567802|gb|AAY80731.1| IVSTMSSK%::::::PHOS:::sample\_2%cmpd\_1052

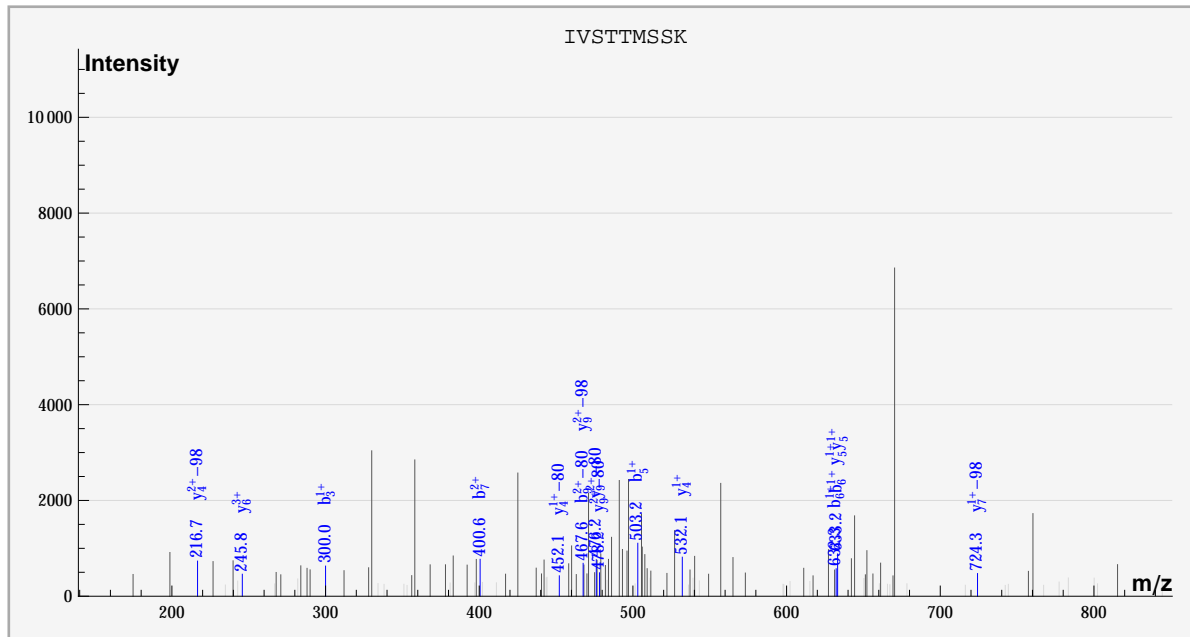

|   | # | b | b* | # | y | y* | P | P* |
|---|---|---|----|---|---|----|---|----|
| I | 1 |   |    |   |   |    |   | ✓  |
| V | 2 |   |    | 8 |   |    |   |    |
| S | 3 | ✓ |    | 7 |   | ✓  |   |    |
| T | 4 |   |    | 6 | ✓ |    |   |    |
| T | 5 | ✓ |    | 5 | ✓ |    |   |    |
| M | 6 | ✓ |    | 4 | ✓ | ✓  |   |    |
| S | 7 | ✓ |    | 3 |   |    |   |    |
| S | 8 |   |    | 2 |   |    |   |    |
| K | 9 |   | ✓  | 1 |   |    |   |    |

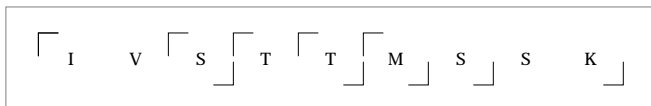

dbValid true VIDMINTK Oxidation\_M(1),PHOS(1) 2. 516. -0.762068 5.23719 100. ? 4146.  
 S\_Acido\_new%gij68566688|gb|AAY79617.1| VIDMINTK%:::Oxidation\_M:::PHOS::%sample\_0%compd\_2681

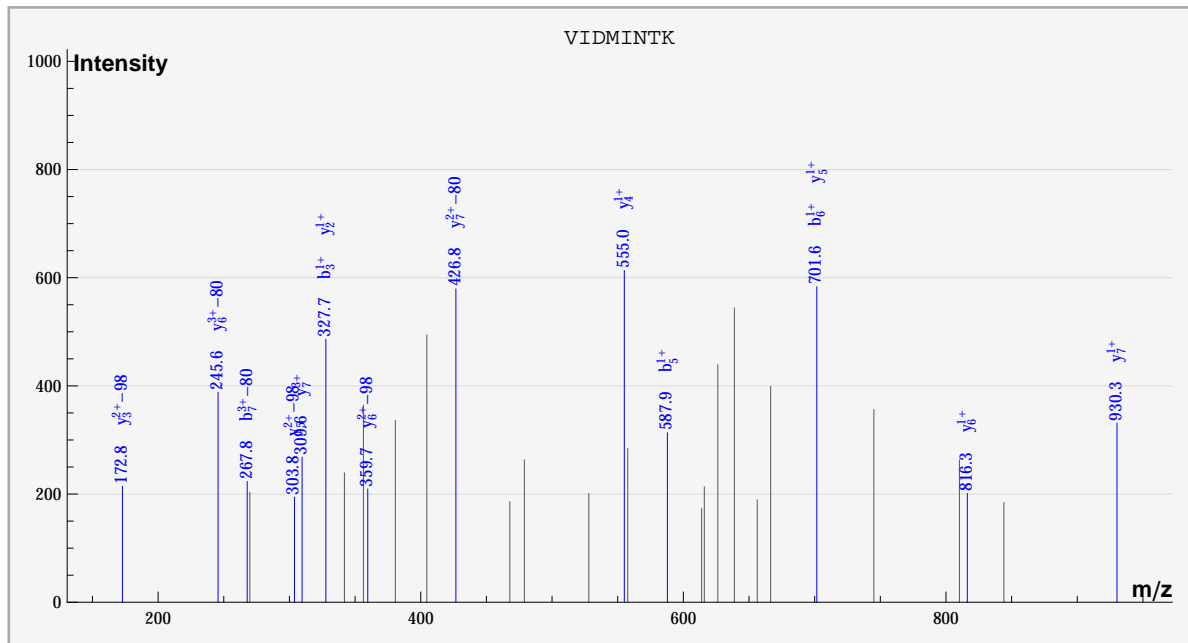

|   | # | b | b* | # | y | y* | P | P* |
|---|---|---|----|---|---|----|---|----|
| V | 1 |   |    |   |   |    |   |    |
| I | 2 |   |    | 7 | ✓ | ✓  |   |    |
| D | 3 | ✓ |    | 6 | ✓ | ✓  |   |    |
| M | 4 |   |    | 5 | ✓ | ✓  |   |    |
| I | 5 | ✓ |    | 4 | ✓ |    |   |    |
| N | 6 | ✓ |    | 3 |   | ✓  |   |    |
| T | 7 |   | ✓  | 2 | ✓ |    |   |    |
| K | 8 |   |    | 1 |   |    |   |    |

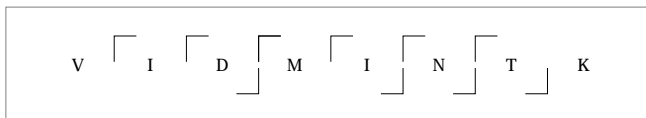

dbValid true VTEIYDK PHOS(2) 2. 516. -1.80715 5.55076 100. ? 4356.  
 S\_Acido\_new%gi|68567813|gb|AA80742.1| VTEIYDK%::PHOS::PHOS::%sample\_0%compd\_2870

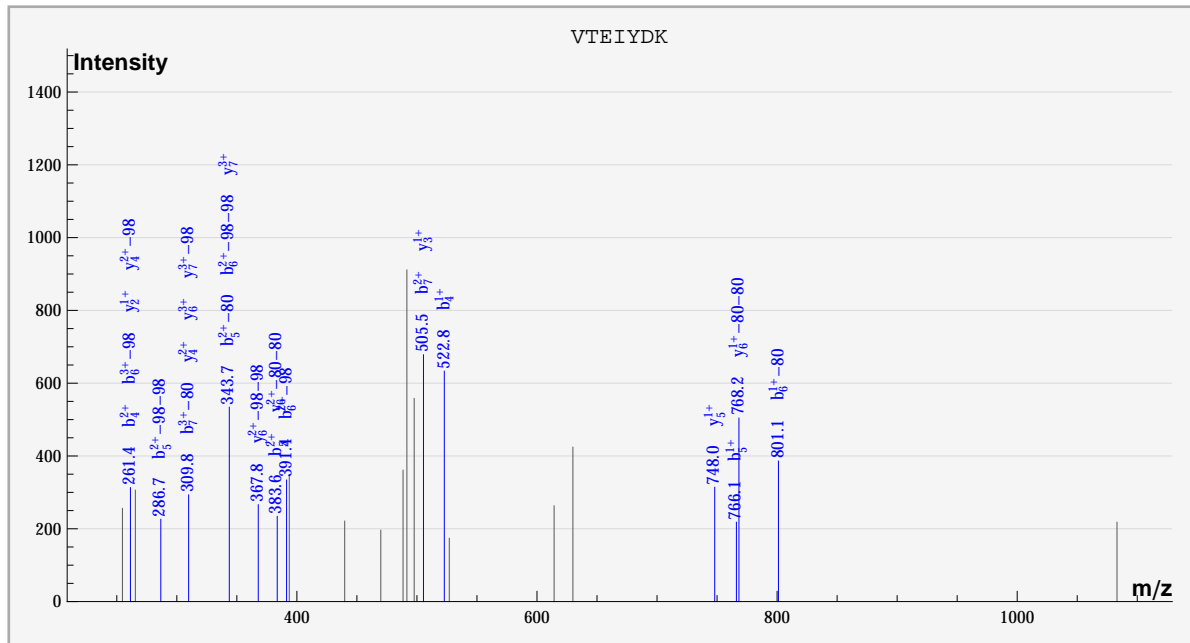

|   | # | b | b* | # | y | y* | P | P* |
|---|---|---|----|---|---|----|---|----|
| V | 1 |   |    |   |   |    | ✓ | ✓  |
| T | 2 |   |    | 6 | ✓ | ✓  |   |    |
| E | 3 |   |    | 5 | ✓ |    |   |    |
| I | 4 | ✓ |    | 4 | ✓ | ✓  |   |    |
| Y | 5 | ✓ | ✓  | 3 | ✓ |    |   |    |
| D | 6 |   | ✓  | 2 | ✓ |    |   |    |
| K | 7 | ✓ | ✓  | 1 |   |    |   |    |

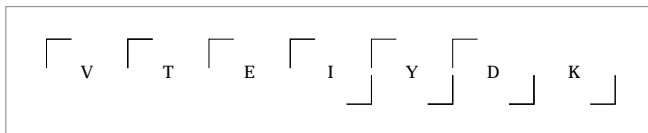

dbValid true RSLRYVR PHOS(1) 2. 516. -0.728703 4.9273 100. ? 4560.

S\_Acido\_new%gi|68567512|gb|AAY80441.1| RSLRYVR%::PHOS::::::%sample\_0%compd\_3057

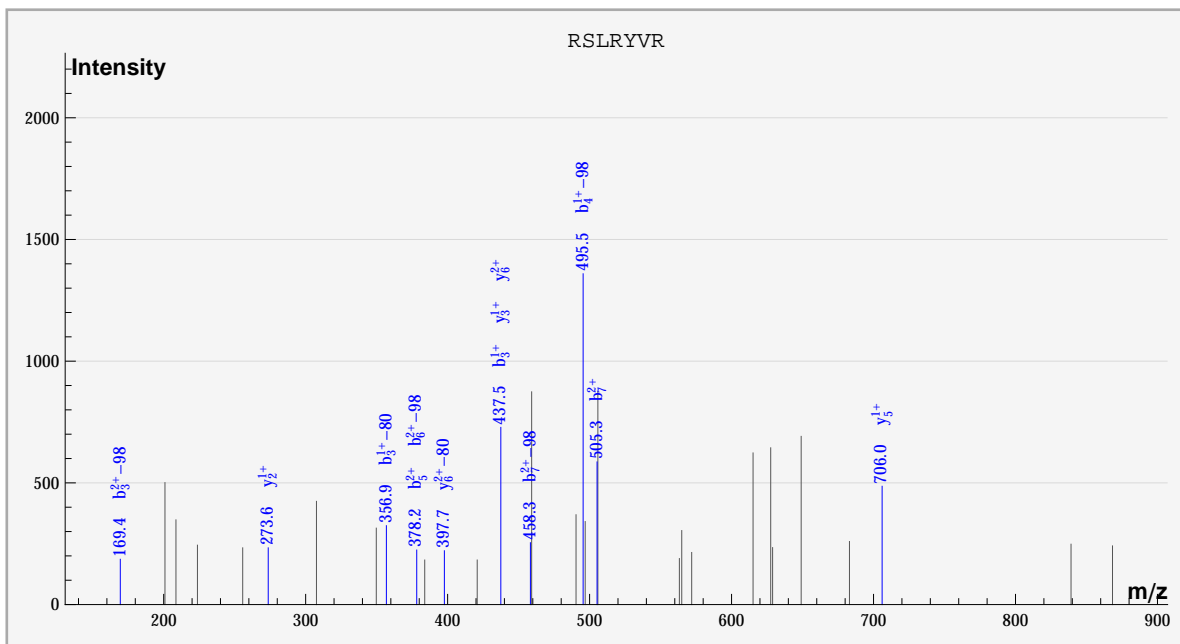

|   | # | b | b* | # | y | y* | P | P* |
|---|---|---|----|---|---|----|---|----|
| R | 1 |   |    |   |   |    |   |    |
| S | 2 |   |    | 6 | ✓ | ✓  |   |    |
| L | 3 | ✓ | ✓  | 5 | ✓ |    |   |    |
| R | 4 |   | ✓  | 4 |   |    |   |    |
| Y | 5 | ✓ |    | 3 | ✓ |    |   |    |
| V | 6 |   | ✓  | 2 | ✓ |    |   |    |
| R | 7 | ✓ | ✓  | 1 |   |    |   |    |

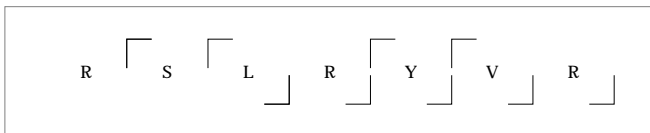

dbValid true ENTHSAGR PHOS(2) 2. 517. -0.829223 5.1299 100. ? 1614.  
 S\_Acido\_new%gi|68568021|gb|AAY80950.1| ENTHSAGR%:::PHOS::PHOS:::sample\_2%compd\_380

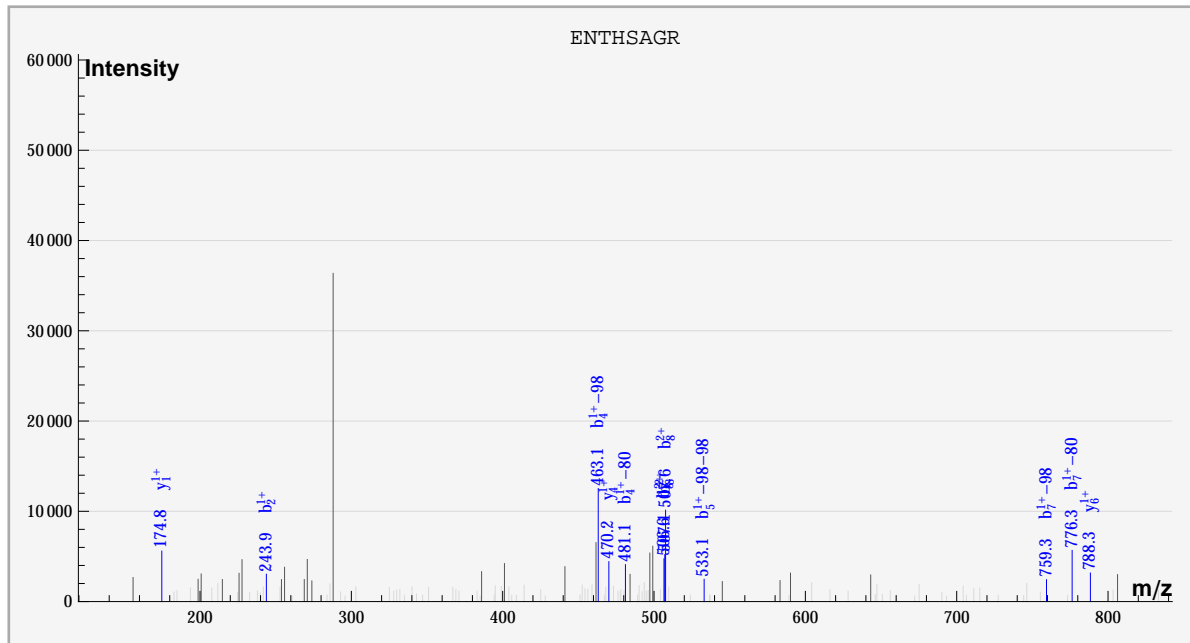

|   | # | b | b* | # | y | y* | P | P* |
|---|---|---|----|---|---|----|---|----|
| E | 1 |   |    |   |   |    |   |    |
| N | 2 | ✓ |    | 7 |   |    |   |    |
| T | 3 |   |    | 6 | ✓ |    |   |    |
| H | 4 |   | ✓  | 5 |   |    |   |    |
| S | 5 |   | ✓  | 4 | ✓ |    |   |    |
| A | 6 |   |    | 3 |   |    |   |    |
| G | 7 |   | ✓  | 2 |   |    |   |    |
| R | 8 | ✓ |    | 1 | ✓ |    |   |    |

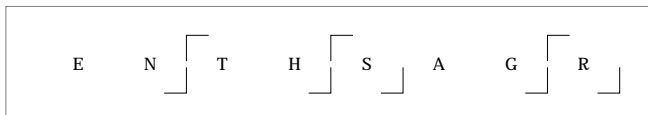

dbValid true ENTHSAGR PHOS(2) 2. 517. -0.829223 4.93236 100. ? 1638.  
 S\_Acido\_new%gi|68568021|gb|AAY80950.1| ENTHSAGR%:::PHOS::PHOS:::%sample\_2%compd\_402

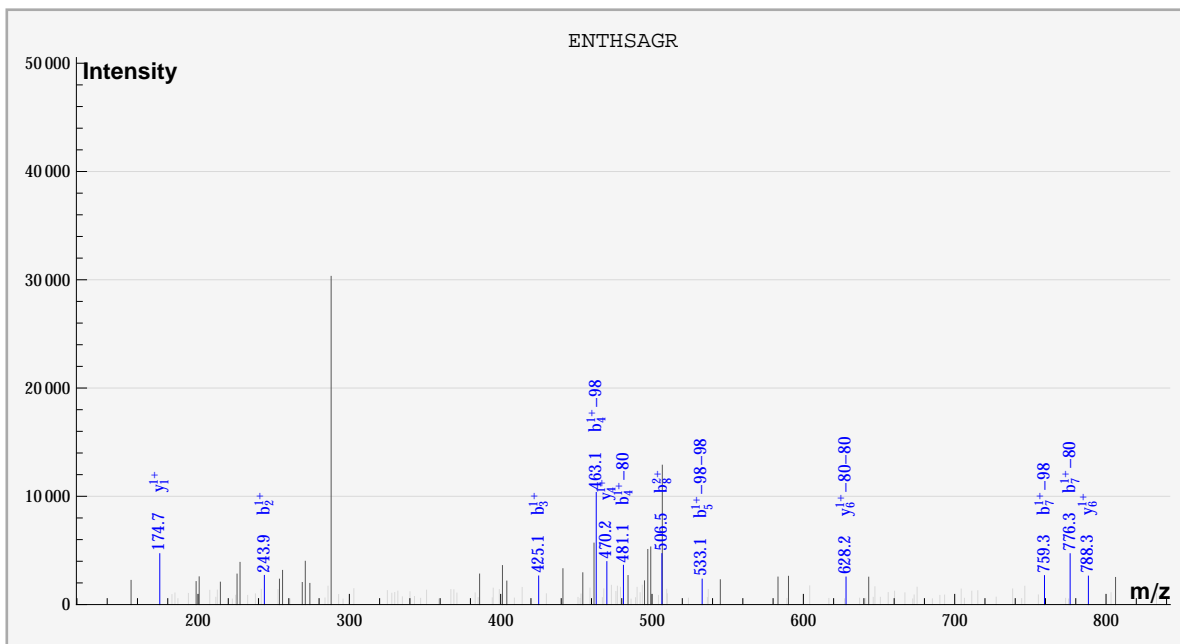

|   | # | b | b* | # | y | y* | P | P* |
|---|---|---|----|---|---|----|---|----|
| E | 1 |   |    |   |   |    |   |    |
| N | 2 | ✓ |    | 7 |   |    |   |    |
| T | 3 | ✓ |    | 6 | ✓ | ✓  |   |    |
| H | 4 |   | ✓  | 5 |   |    |   |    |
| S | 5 |   | ✓  | 4 | ✓ |    |   |    |
| A | 6 |   |    | 3 |   |    |   |    |
| G | 7 | ✓ |    | 2 |   |    |   |    |
| R | 8 | ✓ |    | 1 | ✓ |    |   |    |

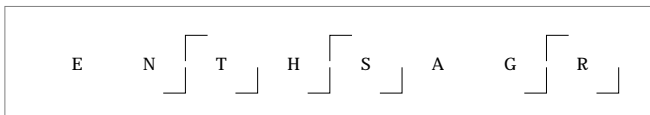

dbValid true ENTHSAGR PHOS(2) 2. 517. -0.829223 5.19185 100. ? 1650.  
 S\_Acido\_new%gi|68568021|gb|AAY80950.1| ENTHSAGR%:::PHOS::PHOS:::%sample\_2%compd\_413

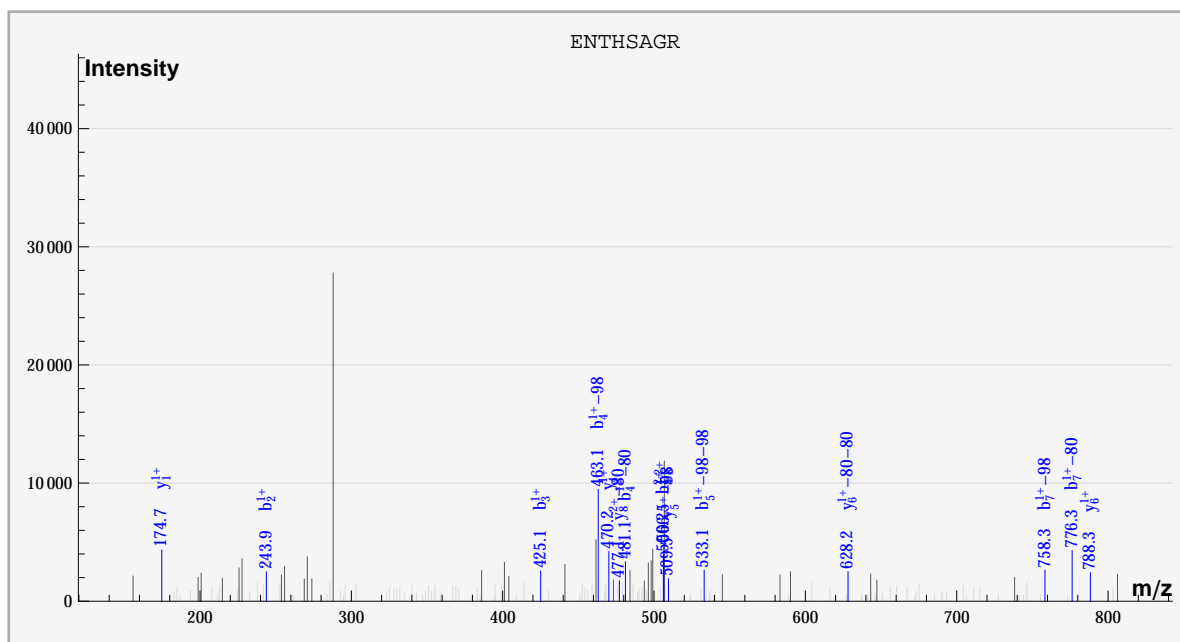

|   | # | b | b* | # | y | y* | P | P* |
|---|---|---|----|---|---|----|---|----|
| E | 1 |   |    |   |   |    |   | ✓  |
| N | 2 | ✓ |    | 7 |   |    |   |    |
| T | 3 | ✓ |    | 6 | ✓ | ✓  |   |    |
| H | 4 |   | ✓  | 5 |   | ✓  |   |    |
| S | 5 |   | ✓  | 4 | ✓ |    |   |    |
| A | 6 |   |    | 3 |   |    |   |    |
| G | 7 | ✓ |    | 2 |   |    |   |    |
| R | 8 | ✓ |    | 1 | ✓ |    |   |    |

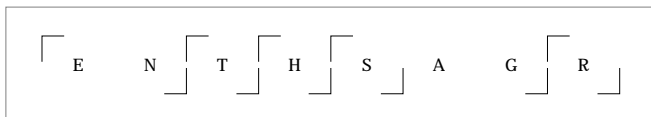



dbValid true YTTKFSK PHOS(2) 2. 517. 0.703392 5.08242 100. ? 2052.  
 S\_Acido\_new%gi|68567977|gb|AAy80906.1| YTTKFSK%:PHOS:PHOS:::sample\_2%compd\_731

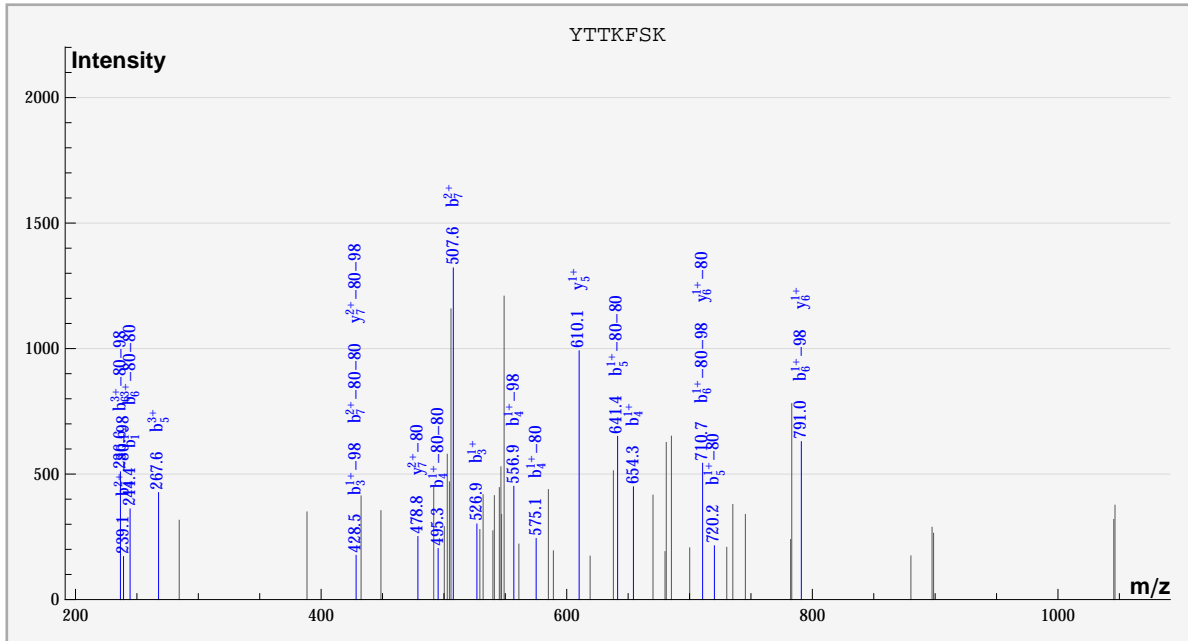

|   | # | b | b* | # | y | y* | P | P* |
|---|---|---|----|---|---|----|---|----|
| Y | 1 | ✓ |    |   |   |    |   | ✓  |
| T | 2 |   |    | 6 | ✓ | ✓  |   |    |
| T | 3 | ✓ | ✓  | 5 | ✓ |    |   |    |
| K | 4 | ✓ | ✓  | 4 |   |    |   |    |
| F | 5 | ✓ | ✓  | 3 |   |    |   |    |
| S | 6 |   | ✓  | 2 |   |    |   |    |
| K | 7 | ✓ | ✓  | 1 |   |    |   |    |

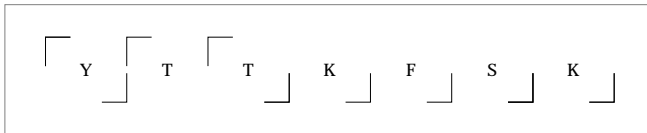

dbConflictWinner true IRYAGTLR PHOS(1) 2. 517. -1.73432 5.72018 100. ?  
 2232. S\_Acido\_new%gi|68566721|gb|AAY79650.1| IRYAGTLR%::::::PHOS:::sample\_0%compd\_924

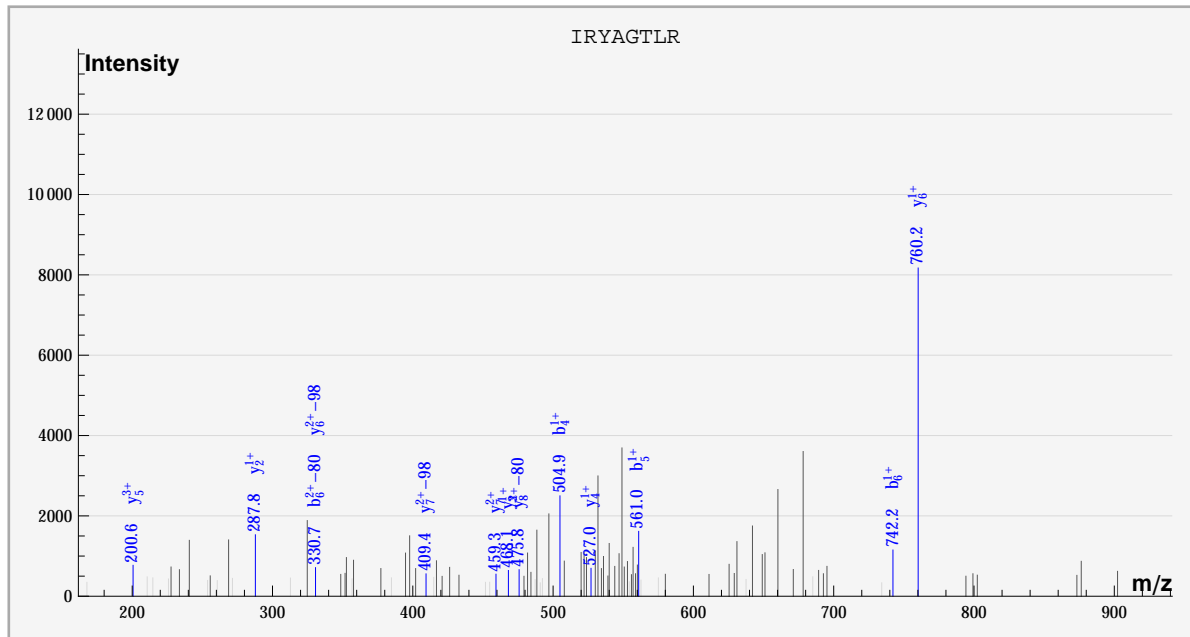

|   | # | b | b* | # | y | y* | P | P* |
|---|---|---|----|---|---|----|---|----|
| I | 1 |   |    |   |   |    |   | ✓  |
| R | 2 |   |    | 7 | ✓ | ✓  |   |    |
| Y | 3 |   |    | 6 | ✓ | ✓  |   |    |
| A | 4 | ✓ |    | 5 | ✓ |    |   |    |
| G | 5 | ✓ |    | 4 | ✓ |    |   |    |
| T | 6 | ✓ | ✓  | 3 | ✓ |    |   |    |
| L | 7 |   |    | 2 | ✓ |    |   |    |
| R | 8 |   |    | 1 |   |    |   |    |

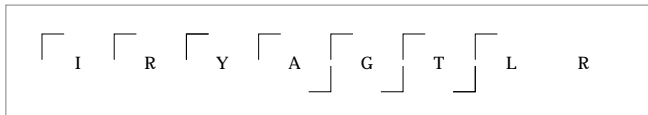

dbValid true YIIVTGGVLSSVGK PHOS(2) 3. 517. 1.25228 5.05616 100. ? 2412.

S\_Acido\_new%gi|68567242|gb|AAy80171.1| YIIVTGGVLSSVGK%:PHOS:.....:PHOS:....:sample\_2%compd\_1097

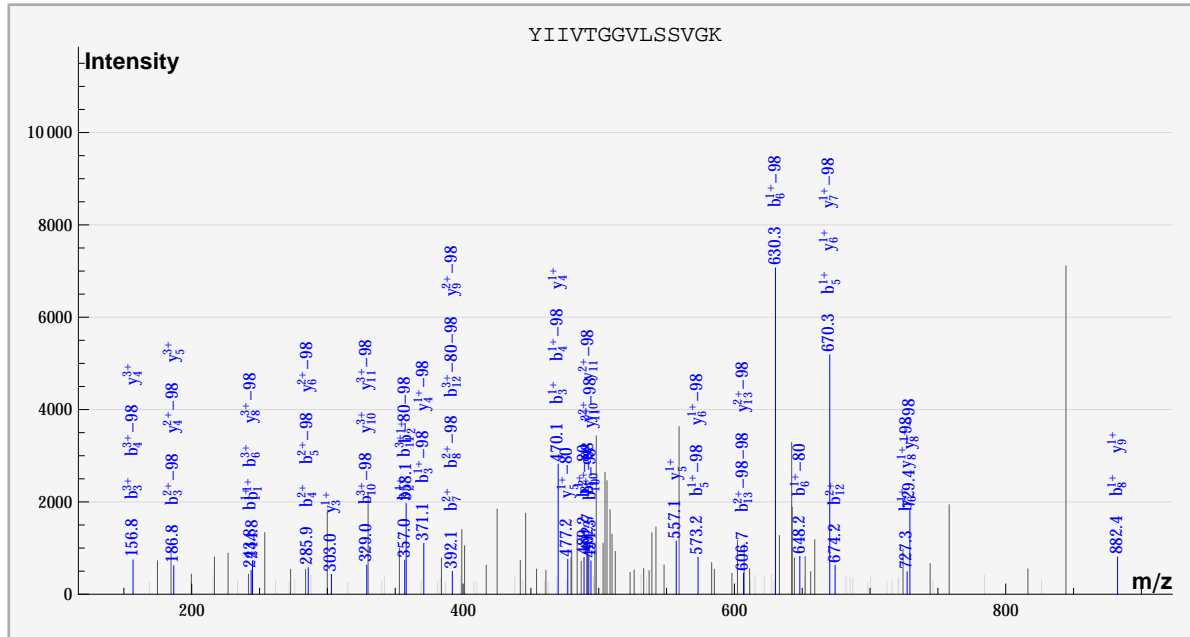

|   | #  | b | b* | #  | y | y* | P | P* |
|---|----|---|----|----|---|----|---|----|
| Y | 1  | ✓ |    |    |   |    |   |    |
| I | 2  | ✓ |    | 13 | ✓ |    |   |    |
| I | 3  | ✓ | ✓  | 12 |   |    |   |    |
| V | 4  | ✓ | ✓  | 11 | ✓ |    |   |    |
| T | 5  | ✓ | ✓  | 10 | ✓ |    |   |    |
| G | 6  | ✓ | ✓  | 9  | ✓ | ✓  |   |    |
| G | 7  | ✓ |    | 8  | ✓ | ✓  |   |    |
| V | 8  | ✓ | ✓  | 7  | ✓ | ✓  |   |    |
| L | 9  |   |    | 6  | ✓ | ✓  |   |    |
| S | 10 |   | ✓  | 5  | ✓ | ✓  |   |    |
| S | 11 |   | ✓  | 4  | ✓ | ✓  |   |    |
| V | 12 | ✓ | ✓  | 3  | ✓ |    |   |    |
| G | 13 |   | ✓  | 2  |   |    |   |    |
| K | 14 |   |    | 1  |   |    |   |    |

Y I I V T G G V L S S V G K

dbValid true YIIVTGGVLSSVGK PHOS(2) 3. 517. 1.25228 5.16094 100. ? 2424.

S\_Acido\_new%gi|68567242|gb|AAV80171.1| YIIVTGGVLSSVGK%:PHOS:.....:PHOS:....%sample\_2%compd\_1107

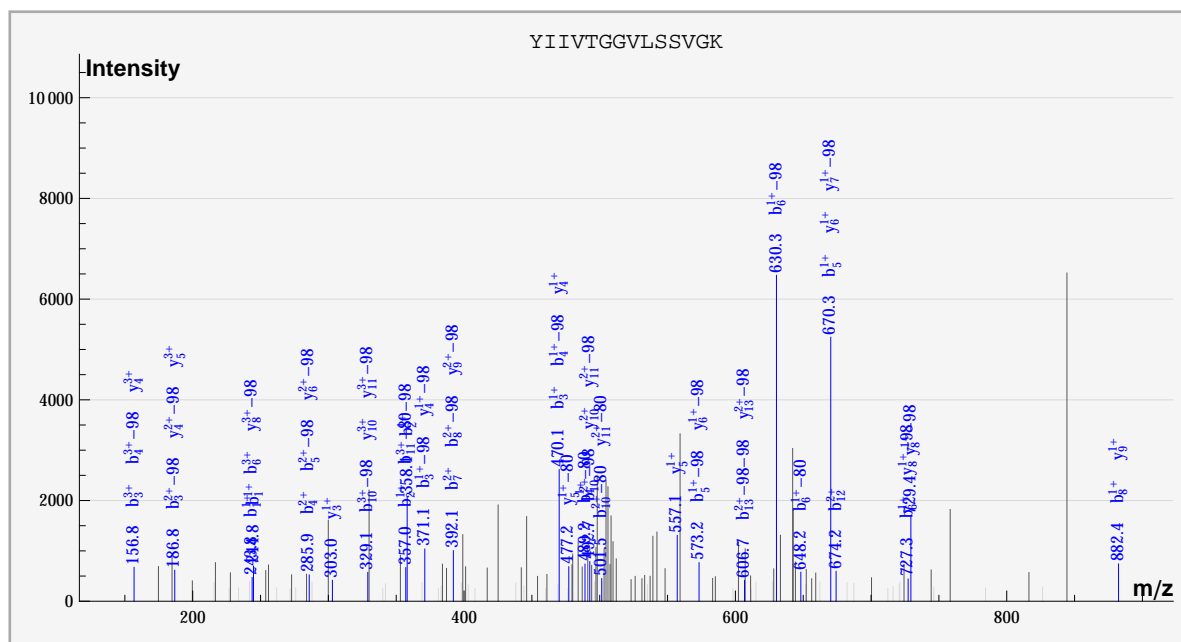

|   | #  | b | b* | #  | y | y* | P | P* |
|---|----|---|----|----|---|----|---|----|
| Y | 1  | ✓ |    |    |   |    |   |    |
| I | 2  | ✓ |    | 13 |   | ✓  |   |    |
| I | 3  | ✓ | ✓  | 12 |   |    |   |    |
| V | 4  | ✓ | ✓  | 11 |   | ✓  |   |    |
| T | 5  | ✓ | ✓  | 10 | ✓ |    |   |    |
| G | 6  | ✓ | ✓  | 9  | ✓ | ✓  |   |    |
| G | 7  | ✓ |    | 8  |   | ✓  |   |    |
| V | 8  | ✓ | ✓  | 7  |   | ✓  |   |    |
| L | 9  |   |    | 6  | ✓ | ✓  |   |    |
| S | 10 |   | ✓  | 5  | ✓ | ✓  |   |    |
| S | 11 |   | ✓  | 4  | ✓ | ✓  |   |    |
| V | 12 | ✓ |    | 3  | ✓ |    |   |    |
| G | 13 |   | ✓  | 2  |   |    |   |    |
| K | 14 |   |    | 1  |   |    |   |    |

Y I I V T G G V L S S V G K

dbValid true YIIVTGGVLSSVGK PHOS(2) 3. 517. 1.25228 5.4062 100. ? 2436.

S\_Acido\_new%gii68567242|gb|AAy80171.1| YIIVTGGVLSSVGK%:PHOS:.....:PHOS:....%sample\_2%compd\_1117

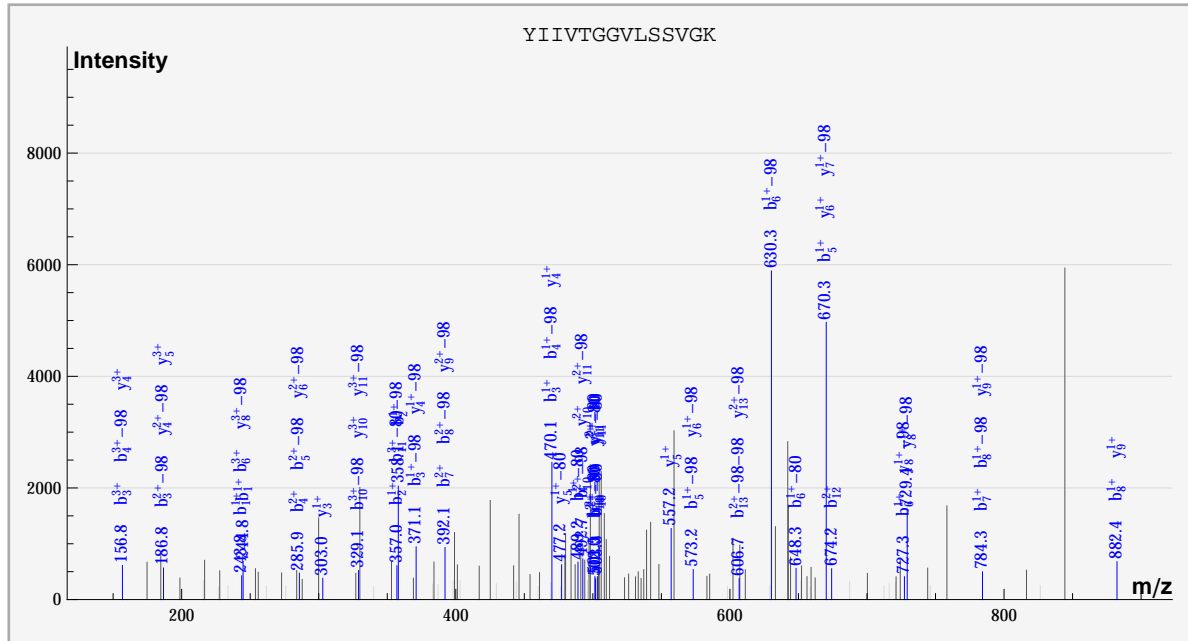

dbValid true YIIVTGGVLSSVGK PHOS(2) 3. 517. 1.25228 5.45352 100. ? 2448.

S\_Acido\_new%gi|68567242|gb|AAV80171.1| YIIVTGGVLSSVGK%:PHOS:.....:PHOS:....%sample\_2%cmpd\_1127

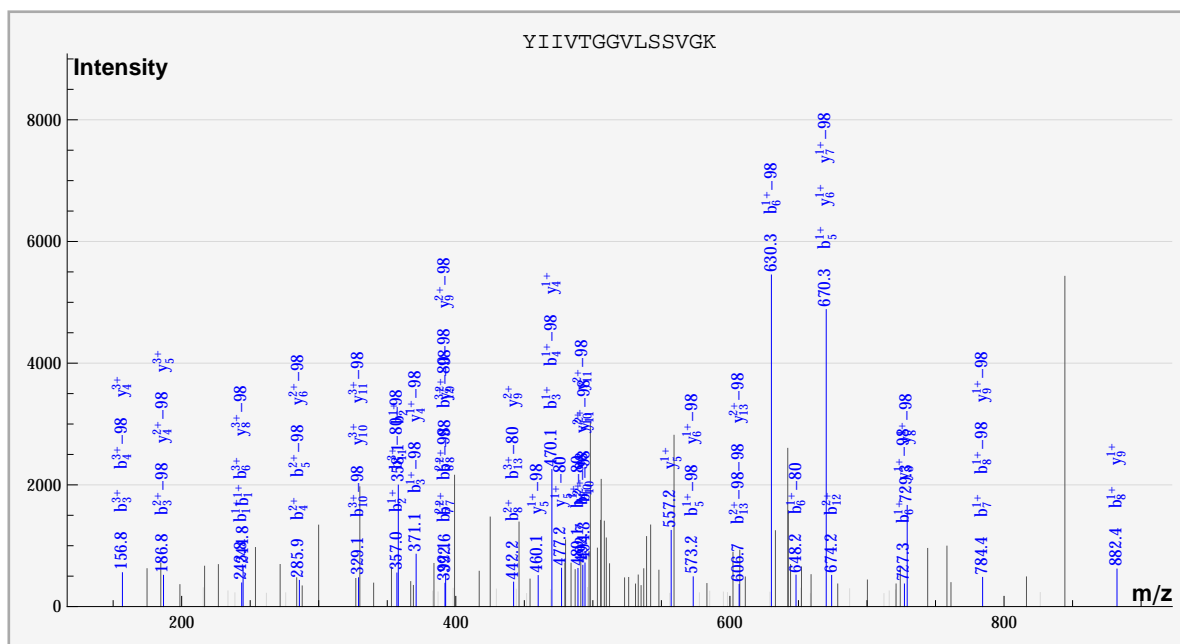

|   | #  | b | b* | #  | y | y* | P | P* |
|---|----|---|----|----|---|----|---|----|
| Y | 1  | ✓ |    |    |   |    |   |    |
| I | 2  | ✓ |    | 13 |   | ✓  |   |    |
| I | 3  | ✓ | ✓  | 12 |   |    |   |    |
| V | 4  | ✓ | ✓  | 11 |   | ✓  |   |    |
| T | 5  | ✓ | ✓  | 10 | ✓ |    |   |    |
| G | 6  | ✓ | ✓  | 9  | ✓ | ✓  |   |    |
| G | 7  | ✓ |    | 8  |   | ✓  |   |    |
| V | 8  | ✓ | ✓  | 7  |   | ✓  |   |    |
| L | 9  |   |    | 6  | ✓ | ✓  |   |    |
| S | 10 |   | ✓  | 5  | ✓ | ✓  |   |    |
| S | 11 |   | ✓  | 4  | ✓ | ✓  |   |    |
| V | 12 | ✓ | ✓  | 3  |   |    |   |    |
| G | 13 |   | ✓  | 2  |   |    |   |    |
| K | 14 |   |    | 1  |   |    |   |    |

Y I I V T G G V L S S V G K

dbValid true YIIVTGGVLSSVGK PHOS(2) 3. 517. 1.25228 4.94888 100. ? 2460.

S\_Acido\_new%gii68567242|gb|AAy80171.1| YIIVTGGVLSSVGK%:PHOS:.....PHOS:....%sample\_2%cmpd\_1137

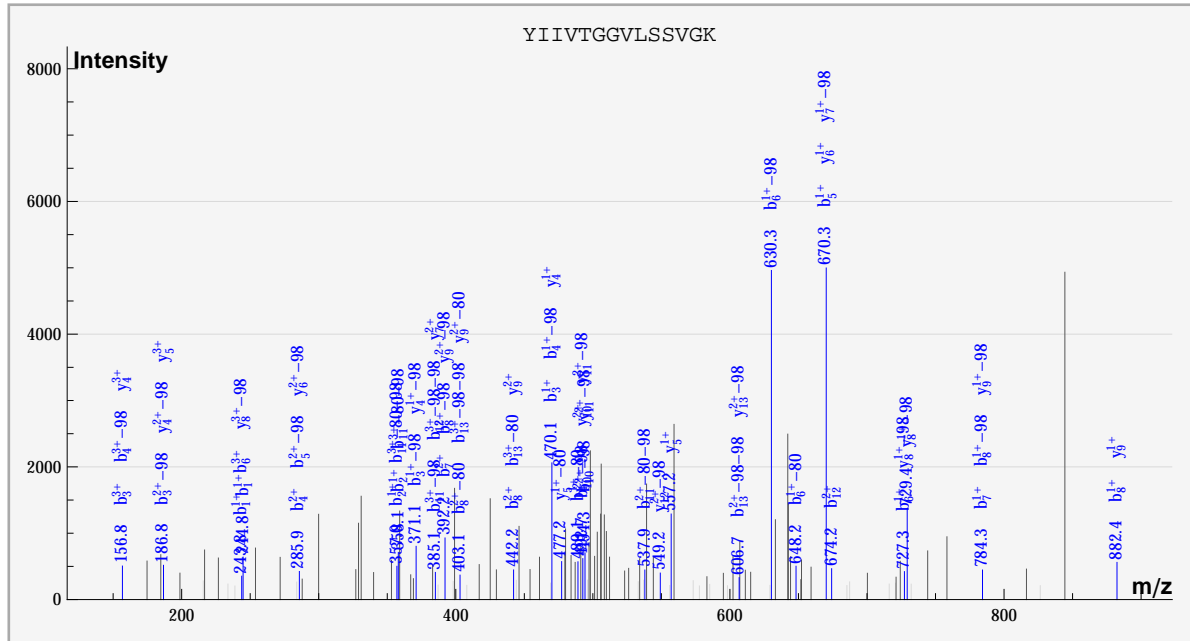

|   | #  | b | b* | #  | y | y* | P | P* |
|---|----|---|----|----|---|----|---|----|
| Y | 1  | ✓ |    |    |   |    |   |    |
| I | 2  | ✓ |    | 13 |   | ✓  |   |    |
| I | 3  | ✓ | ✓  | 12 |   | ✓  |   |    |
| V | 4  | ✓ | ✓  | 11 |   | ✓  |   |    |
| T | 5  | ✓ | ✓  | 10 | ✓ |    |   |    |
| G | 6  | ✓ | ✓  | 9  | ✓ | ✓  |   |    |
| G | 7  | ✓ |    | 8  |   | ✓  |   |    |
| V | 8  | ✓ | ✓  | 7  | ✓ | ✓  |   |    |
| L | 9  |   |    | 6  | ✓ | ✓  |   |    |
| S | 10 |   | ✓  | 5  | ✓ | ✓  |   |    |
| S | 11 |   | ✓  | 4  | ✓ | ✓  |   |    |
| V | 12 | ✓ | ✓  | 3  |   |    |   |    |
| G | 13 |   | ✓  | 2  |   |    |   |    |
| K | 14 |   |    | 1  |   |    |   |    |

Y I I V T G G V L S S V G K





dbValid true YIIVTGGVLSSVGK PHOS(2) 3. 517. 1.25228 5.35027 100. ? 2484.

S\_Acido\_new%gi|68567242|gb|AAV80171.1| YIIVTGGVLSSVGK%:PHOS:.....PHOS:....%sample\_2%compd\_1159

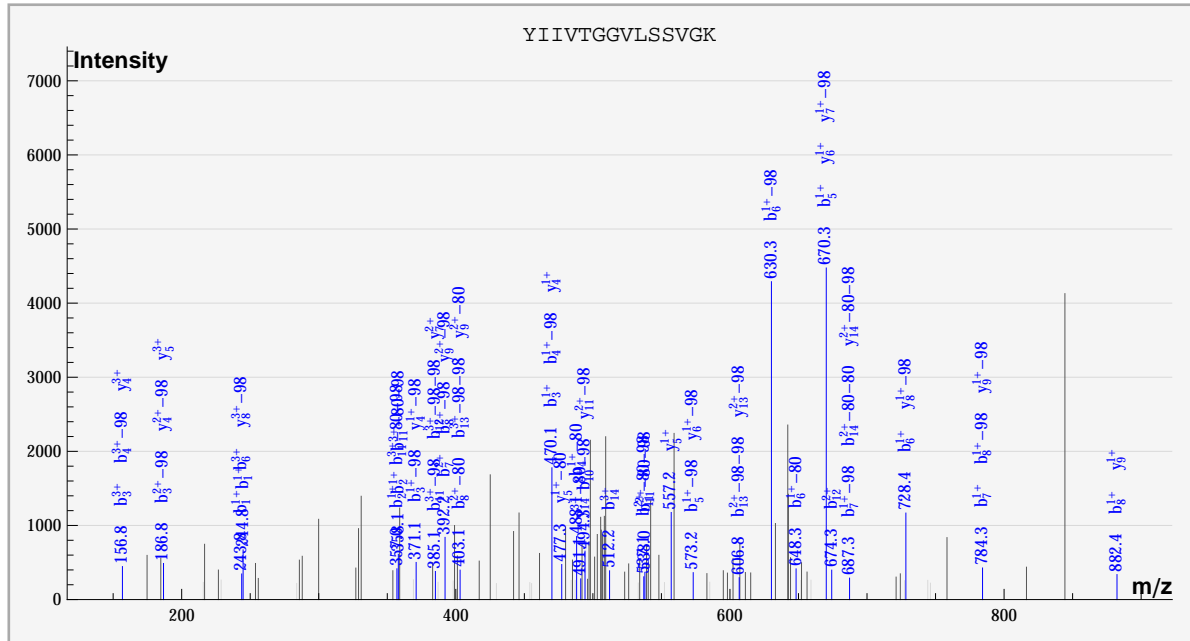

|   | #  | b | b* | #  | y | y* | P | P* |
|---|----|---|----|----|---|----|---|----|
| Y | 1  | ✓ |    |    |   |    |   | ✓  |
| I | 2  | ✓ |    | 13 |   | ✓  |   |    |
| I | 3  | ✓ | ✓  | 12 |   |    |   |    |
| V | 4  |   | ✓  | 11 |   | ✓  |   |    |
| T | 5  | ✓ | ✓  | 10 |   |    |   |    |
| G | 6  | ✓ | ✓  | 9  | ✓ | ✓  |   |    |
| G | 7  | ✓ | ✓  | 8  |   | ✓  |   |    |
| V | 8  | ✓ | ✓  | 7  | ✓ | ✓  |   |    |
| L | 9  |   |    | 6  | ✓ | ✓  |   |    |
| S | 10 |   | ✓  | 5  | ✓ | ✓  |   |    |
| S | 11 |   | ✓  | 4  | ✓ | ✓  |   |    |
| V | 12 | ✓ | ✓  | 3  |   |    |   |    |
| G | 13 |   | ✓  | 2  |   |    |   |    |
| K | 14 | ✓ | ✓  | 1  |   |    |   |    |

Y I I V T G G V L S S V G K

dbValid true YIIVTGGVLSSVGK PHOS(2) 3. 517. 1.25228 5.14417 100. ? 2496.

S\_Acido\_new%gi|68567242|gb|AA80171.1| YIIVTGGVLSSVGK%:PHOS:.....:PHOS:....:sample\_2%compd\_1170

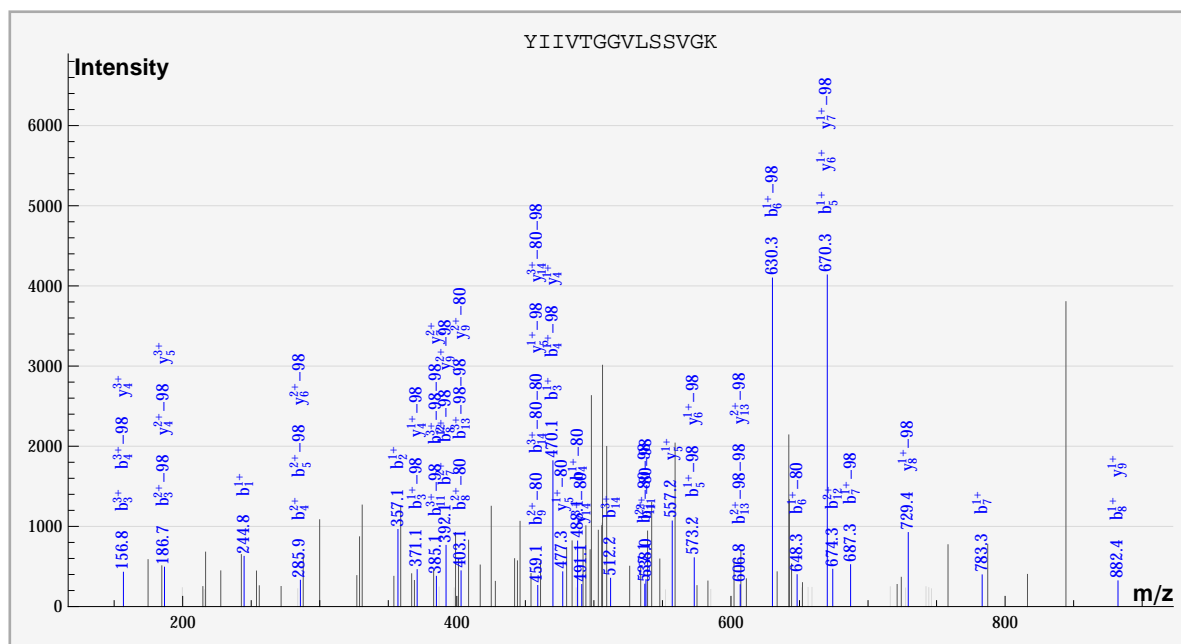

dbValid true YIIVTGGVLSSVGK PHOS(2) 3. 517. 1.25228 5.1394 100. ? 2508.

S\_Acido\_new%gii68567242|gb|AAy80171.1| YIIVTGGVLSSVGK%:PHOS:.....:PHOS:....:sample\_2%compd\_1181

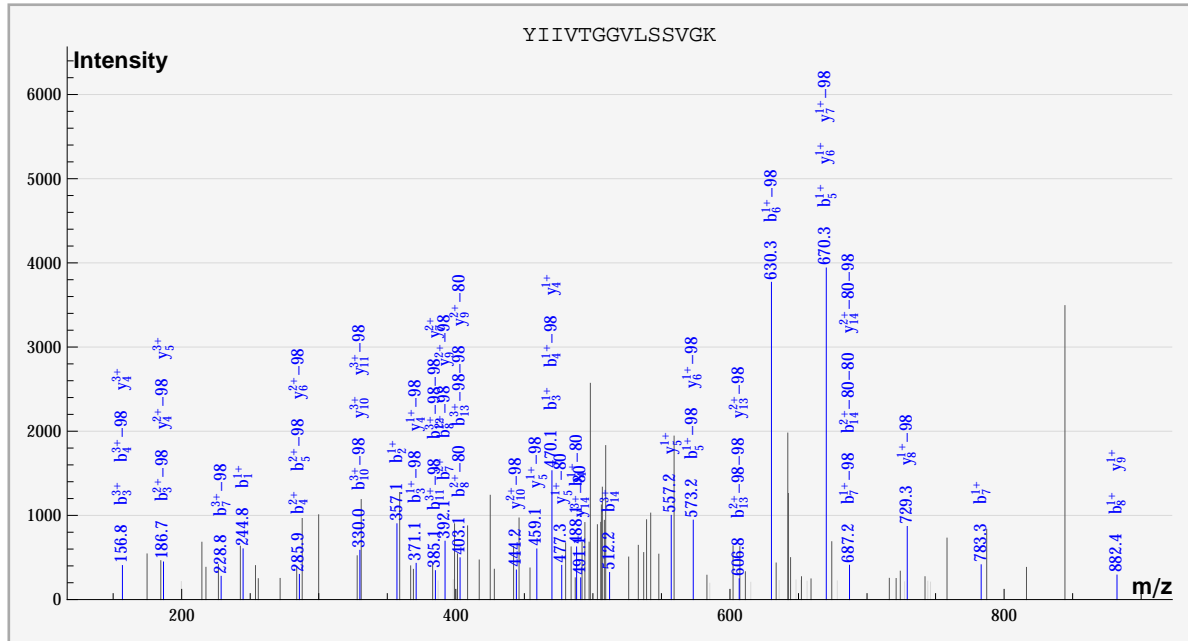

|   | #  | b | b* | #  | y | y* | P | P* |
|---|----|---|----|----|---|----|---|----|
| Y | 1  | ✓ |    |    |   |    |   | ✓  |
| I | 2  | ✓ |    | 13 |   | ✓  |   |    |
| I | 3  | ✓ | ✓  | 12 |   |    |   |    |
| V | 4  | ✓ | ✓  | 11 |   | ✓  |   |    |
| T | 5  | ✓ | ✓  | 10 | ✓ | ✓  |   |    |
| G | 6  | ✓ | ✓  | 9  | ✓ | ✓  |   |    |
| G | 7  | ✓ | ✓  | 8  | ✓ | ✓  |   |    |
| V | 8  | ✓ | ✓  | 7  | ✓ | ✓  |   |    |
| L | 9  |   |    | 6  | ✓ | ✓  |   |    |
| S | 10 |   | ✓  | 5  | ✓ | ✓  |   |    |
| S | 11 |   | ✓  | 4  | ✓ | ✓  |   |    |
| V | 12 |   | ✓  | 3  |   |    |   |    |
| G | 13 |   | ✓  | 2  |   |    |   |    |
| K | 14 | ✓ | ✓  | 1  |   |    |   |    |

[Y][I][I][V][T][G][G][V][L][S][S][V][G][K]

dbValid true YIIVTGGVLSSVGK PHOS(2) 3. 517. 1.25228 5.78934 100. ? 2544.

S\_Acido\_new%gi|68567242|gb|AAV80171.1| YIIVTGGVLSSVGK%:PHOS:.....:PHOS:....%sample\_2%compd\_1213

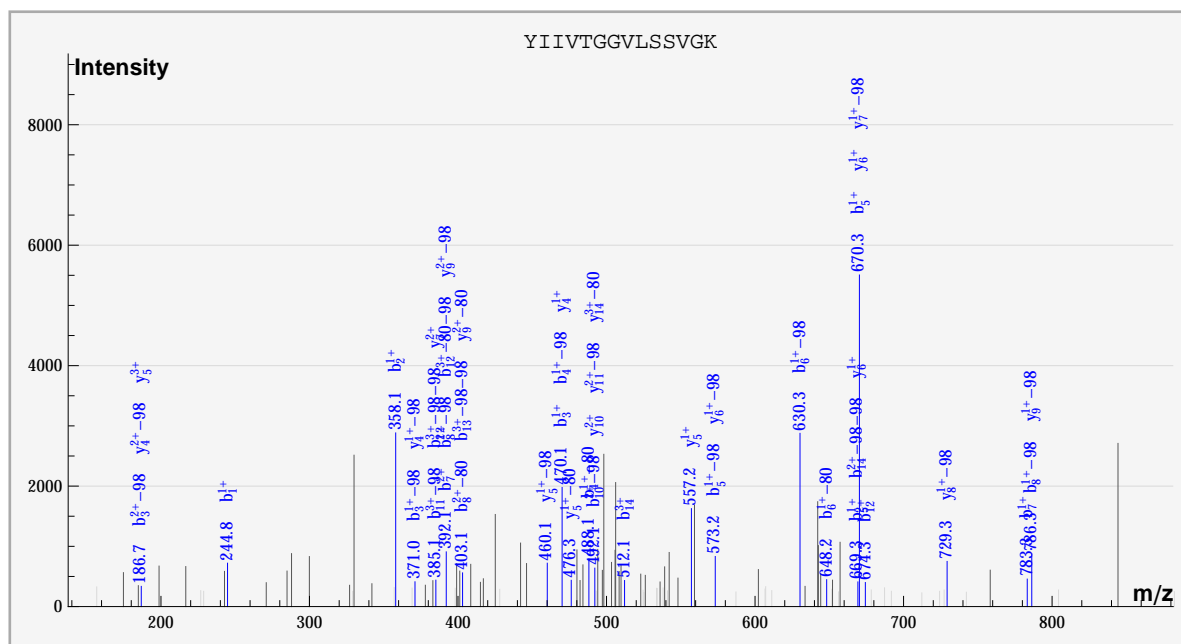

|   | #  | b | b* | #  | y | y* | P | P* |
|---|----|---|----|----|---|----|---|----|
| Y | 1  | ✓ |    |    |   |    |   | ✓  |
| I | 2  | ✓ |    | 13 |   |    |   |    |
| I | 3  | ✓ | ✓  | 12 |   |    |   |    |
| V | 4  | ✓ | ✓  | 11 | ✓ |    |   |    |
| T | 5  | ✓ | ✓  | 10 | ✓ |    |   |    |
| G | 6  | ✓ | ✓  | 9  |   | ✓  |   |    |
| G | 7  | ✓ |    | 8  |   | ✓  |   |    |
| V | 8  |   | ✓  | 7  | ✓ | ✓  |   |    |
| L | 9  |   |    | 6  | ✓ | ✓  |   |    |
| S | 10 |   | ✓  | 5  | ✓ | ✓  |   |    |
| S | 11 |   | ✓  | 4  | ✓ | ✓  |   |    |
| V | 12 | ✓ | ✓  | 3  |   |    |   |    |
| G | 13 |   | ✓  | 2  |   |    |   |    |
| K | 14 | ✓ | ✓  | 1  |   |    |   |    |

Y I I V T G G V L S S V G K

dbValid true YIIVTGGVLSSVGK PHOS(2) 3. 517. 1.25228 5.13379 100. ? 2592.

S\_Acido\_new%gi|68567242|gb|AAy80171.1| YIIVTGGVLSSVGK%:PHOS:.....:PHOS:....%sample\_2%cmpd\_1254

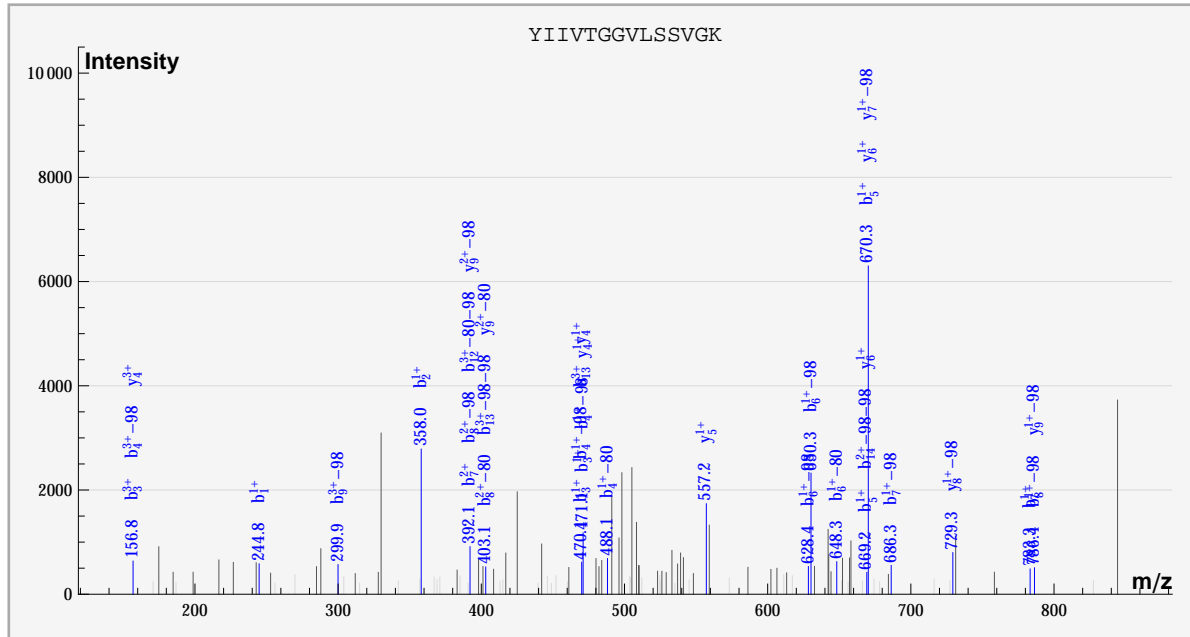

|   | #  | b | b* | #  | y | y* | P | P* |
|---|----|---|----|----|---|----|---|----|
| Y | 1  | ✓ |    |    |   |    |   |    |
| I | 2  | ✓ |    | 13 |   |    |   |    |
| I | 3  | ✓ |    | 12 |   |    |   |    |
| V | 4  |   | ✓  | 11 |   |    |   |    |
| T | 5  | ✓ |    | 10 |   |    |   |    |
| G | 6  |   | ✓  | 9  |   | ✓  |   |    |
| G | 7  | ✓ | ✓  | 8  |   | ✓  |   |    |
| V | 8  |   | ✓  | 7  |   | ✓  |   |    |
| L | 9  |   | ✓  | 6  | ✓ |    |   |    |
| S | 10 |   |    | 5  | ✓ |    |   |    |
| S | 11 |   |    | 4  | ✓ |    |   |    |
| V | 12 |   | ✓  | 3  |   |    |   |    |
| G | 13 | ✓ | ✓  | 2  |   |    |   |    |
| K | 14 |   | ✓  | 1  |   |    |   |    |

Y I I V T G G V L S S V G K

dbValid true YIIVTGGVLSSVGK PHOS(2) 3. 517. 1.25228 4.91853 100. ? 2628.

S\_Acido\_new%gi|68567242|gb|AAV80171.1| YIIVTGGVLSSVGK%:PHOS:.....:PHOS:....%sample\_2%compd\_1287

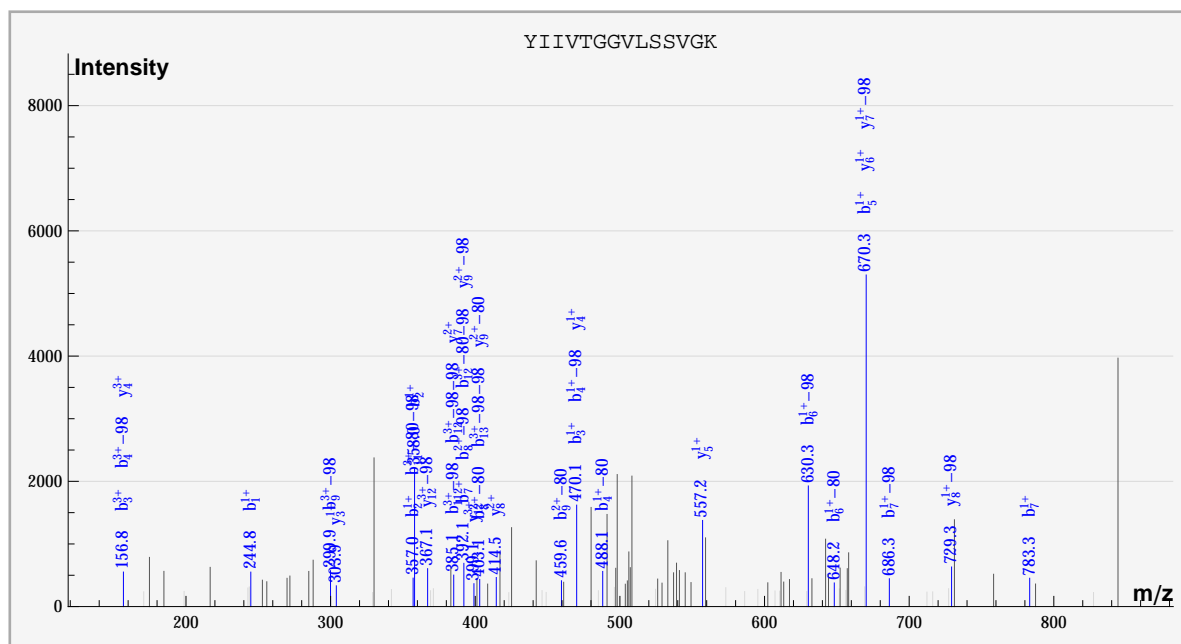

|   | #  | b | b* | #  | y | y* | P | P* |
|---|----|---|----|----|---|----|---|----|
| Y | 1  | ✓ |    |    |   |    |   |    |
| I | 2  | ✓ |    | 13 |   |    |   |    |
| I | 3  | ✓ |    | 12 | ✓ | ✓  |   |    |
| V | 4  |   | ✓  | 11 |   |    |   |    |
| T | 5  | ✓ |    | 10 |   |    |   |    |
| G | 6  |   | ✓  | 9  |   | ✓  |   |    |
| G | 7  | ✓ | ✓  | 8  | ✓ | ✓  |   |    |
| V | 8  |   | ✓  | 7  | ✓ | ✓  |   |    |
| L | 9  |   | ✓  | 6  | ✓ |    |   |    |
| S | 10 |   |    | 5  | ✓ |    |   |    |
| S | 11 |   | ✓  | 4  | ✓ |    |   |    |
| V | 12 |   | ✓  | 3  | ✓ |    |   |    |
| G | 13 |   | ✓  | 2  |   |    |   |    |
| K | 14 |   |    | 1  |   |    |   |    |

Y I I V T G G V L S S V G K

dbValid true YIIVTGGVLSSVGK PHOS(2) 3. 517. 1.25228 5.33402 100. ? 2700.

S\_Acido\_new%gi|68567242|gb|AAV80171.1| YIIVTGGVLSSVGK%:PHOS:.....PHOS:....%sample\_2%compd\_1350

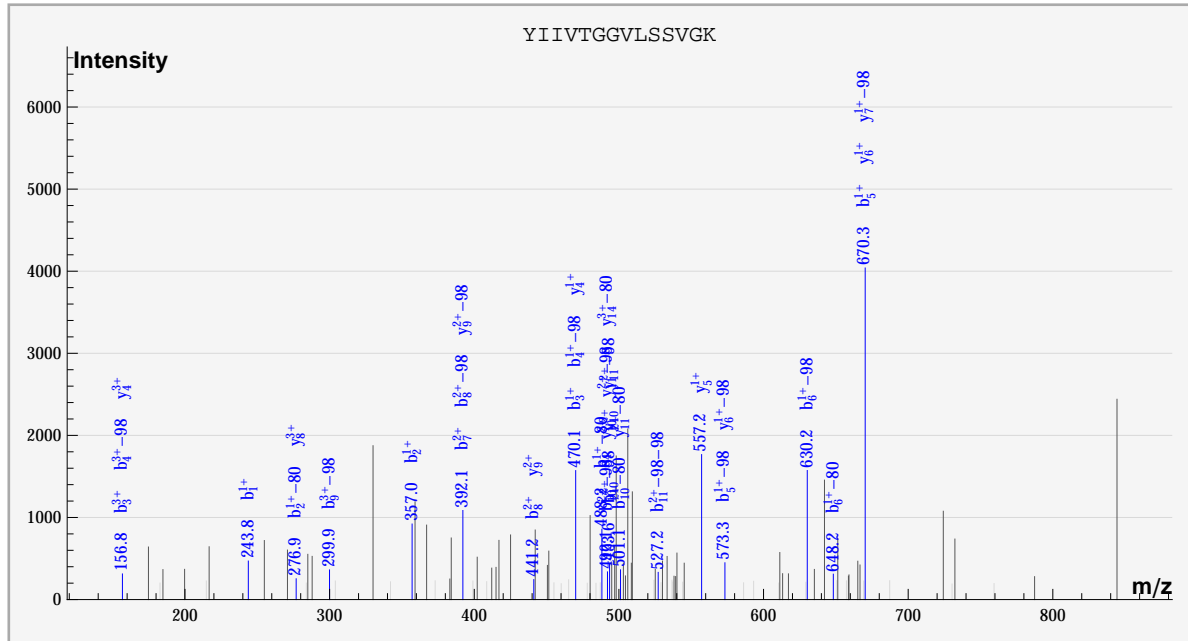

|   | #  | b | b* | #  | y | y* | P | P* |
|---|----|---|----|----|---|----|---|----|
| Y | 1  | ✓ |    |    |   |    |   | ✓  |
| I | 2  | ✓ | ✓  | 13 |   |    |   |    |
| I | 3  | ✓ |    | 12 |   |    |   |    |
| V | 4  |   | ✓  | 11 |   | ✓  |   |    |
| T | 5  | ✓ | ✓  | 10 | ✓ |    |   |    |
| G | 6  |   | ✓  | 9  | ✓ | ✓  |   |    |
| G | 7  | ✓ |    | 8  | ✓ |    |   |    |
| V | 8  | ✓ | ✓  | 7  |   | ✓  |   |    |
| L | 9  |   | ✓  | 6  | ✓ | ✓  |   |    |
| S | 10 |   | ✓  | 5  | ✓ |    |   |    |
| S | 11 |   | ✓  | 4  | ✓ |    |   |    |
| V | 12 |   |    | 3  |   |    |   |    |
| G | 13 |   |    | 2  |   |    |   |    |
| K | 14 |   |    | 1  |   |    |   |    |

Y I I V T G G V L S S V G K

dbValid true YIIVTGGVLSSVGK PHOS(2) 3. 517. 1.25228 5.02772 100. ? 2808.  
 S\_Acido\_new%gi|68567242|gb|AAy80171.1| YIIVTGGVLSSVGK%:PHOS:.....PHOS:....%sample\_2%compd\_1448

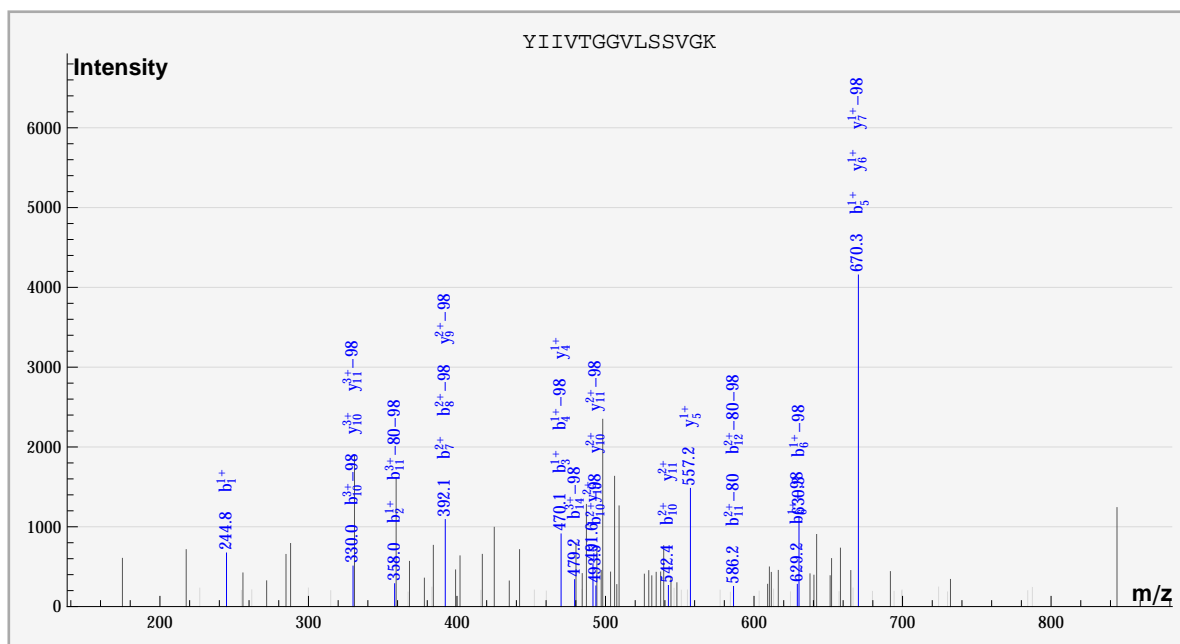

|   | #  | b | b* | #  | y | y* | P | P* |
|---|----|---|----|----|---|----|---|----|
| Y | 1  | ✓ |    |    |   |    |   |    |
| I | 2  | ✓ |    | 13 |   |    |   |    |
| I | 3  | ✓ |    | 12 |   |    |   |    |
| V | 4  |   | ✓  | 11 | ✓ | ✓  |   |    |
| T | 5  | ✓ |    | 10 | ✓ |    |   |    |
| G | 6  |   | ✓  | 9  |   | ✓  |   |    |
| G | 7  | ✓ |    | 8  |   |    |   |    |
| V | 8  |   | ✓  | 7  |   | ✓  |   |    |
| L | 9  |   |    | 6  | ✓ |    |   |    |
| S | 10 | ✓ | ✓  | 5  | ✓ |    |   |    |
| S | 11 |   | ✓  | 4  | ✓ |    |   |    |
| V | 12 |   | ✓  | 3  |   |    |   |    |
| G | 13 |   |    | 2  |   |    |   |    |
| K | 14 | ✓ |    | 1  |   |    |   |    |

Y I I V T G G V L S S V G K



dbValid true YVYSVNK PHOS(2) 2. 517. -0.304433 5.4273 100. ? 3414.  
 S\_Acido\_new%gil68566929|gb|AA79858.1| YVYSVNK%:PHOS::PHOS:::%sample\_0%cmpd\_2006

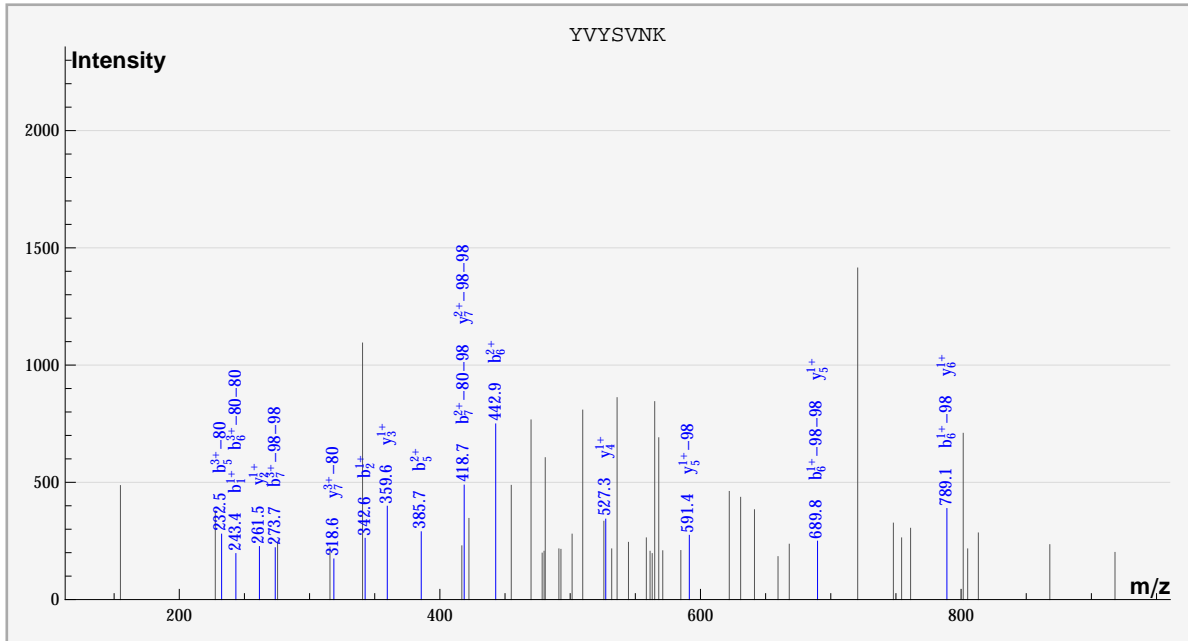

|   | # | b | b* | # | y | y* | P | P* |
|---|---|---|----|---|---|----|---|----|
| Y | 1 | ✓ |    |   |   |    |   | ✓  |
| V | 2 | ✓ |    | 6 | ✓ |    |   |    |
| Y | 3 |   |    | 5 | ✓ | ✓  |   |    |
| S | 4 |   |    | 4 | ✓ |    |   |    |
| V | 5 | ✓ | ✓  | 3 | ✓ |    |   |    |
| N | 6 | ✓ | ✓  | 2 | ✓ |    |   |    |
| K | 7 |   | ✓  | 1 |   |    |   |    |

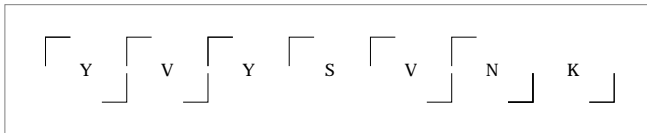

dbValid true DIIEASFR PHOS(1) 2. 517. -1.26613 5.13789 100. ? 3882.  
 S\_Acido\_new%gi|68566750|gb|AAY79679.1| DIIEASFR%::::::PHOS:::sample\_0%compd\_2439

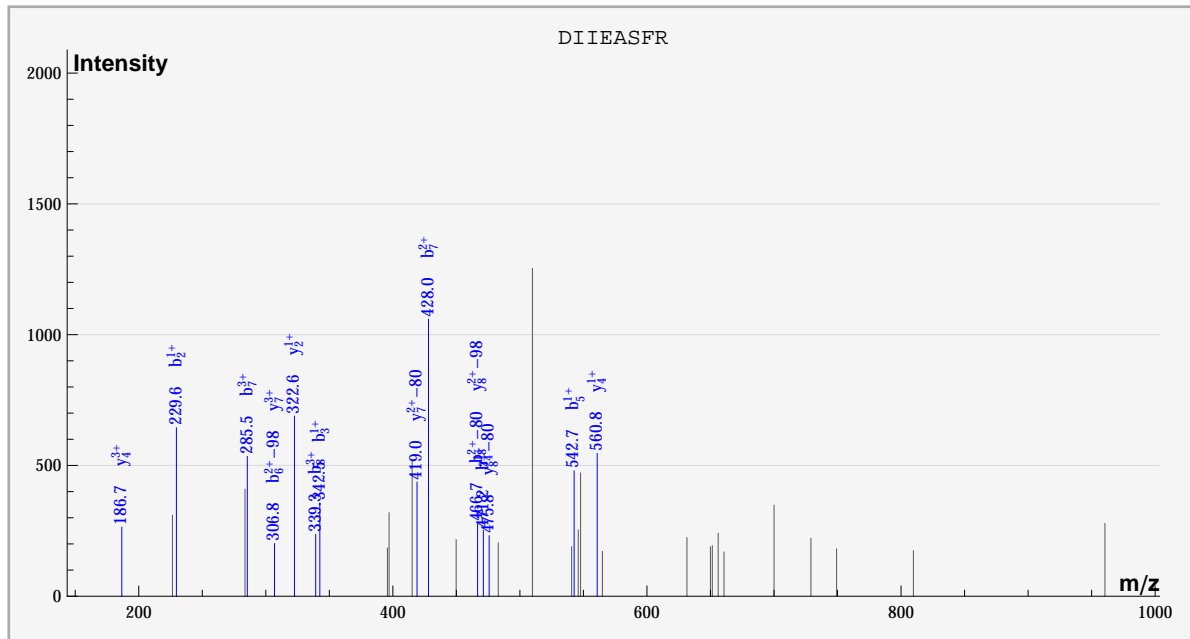

|   | # | b | b* | # | y | y* | P | P* |
|---|---|---|----|---|---|----|---|----|
| D | 1 |   |    |   |   |    |   | ✓  |
| I | 2 | ✓ |    | 7 | ✓ | ✓  |   |    |
| I | 3 | ✓ |    | 6 |   |    |   |    |
| E | 4 | ✓ |    | 5 |   |    |   |    |
| A | 5 | ✓ |    | 4 | ✓ |    |   |    |
| S | 6 |   | ✓  | 3 |   |    |   |    |
| F | 7 | ✓ |    | 2 | ✓ |    |   |    |
| R | 8 | ✓ | ✓  | 1 |   |    |   |    |

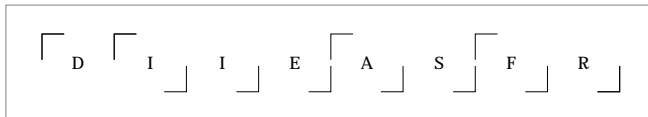

dbValid true TKKLIPTR PHOS(1) 2. 518. 0.799352 4.9944 100. ? 1884.  
 S\_Acido\_new%gi|68567277|gb|AAY80206.1| TKKLIPTR%::::::PHOS::%sample\_2%cmpd\_586

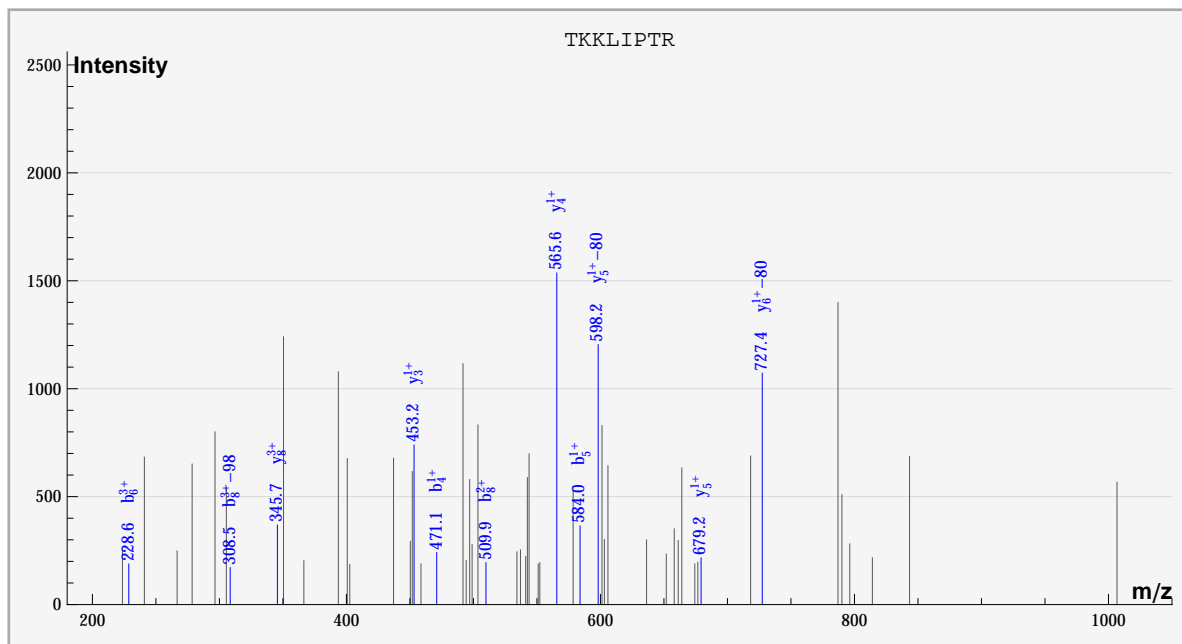

|   | # | b | b* | # | y | y* | P | P* |
|---|---|---|----|---|---|----|---|----|
| T | 1 |   |    |   |   |    |   | ✓  |
| K | 2 |   |    | 7 |   |    |   |    |
| K | 3 |   |    | 6 |   |    |   | ✓  |
| L | 4 | ✓ |    | 5 | ✓ | ✓  |   |    |
| I | 5 | ✓ |    | 4 | ✓ |    |   |    |
| P | 6 | ✓ |    | 3 | ✓ |    |   |    |
| T | 7 |   |    | 2 |   |    |   |    |
| R | 8 | ✓ | ✓  | 1 |   |    |   |    |

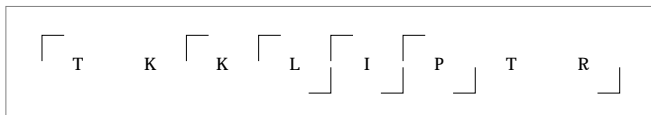

dbValid true GRITTSLYR PHOS(1) 2. 518. -0.755053 5.53894 100. ? 2256.  
 S\_Acido\_new%gi|68568646|gb|AAY81575.1| GRITTSLYR%:::PHOS:::sample\_0%compd\_947

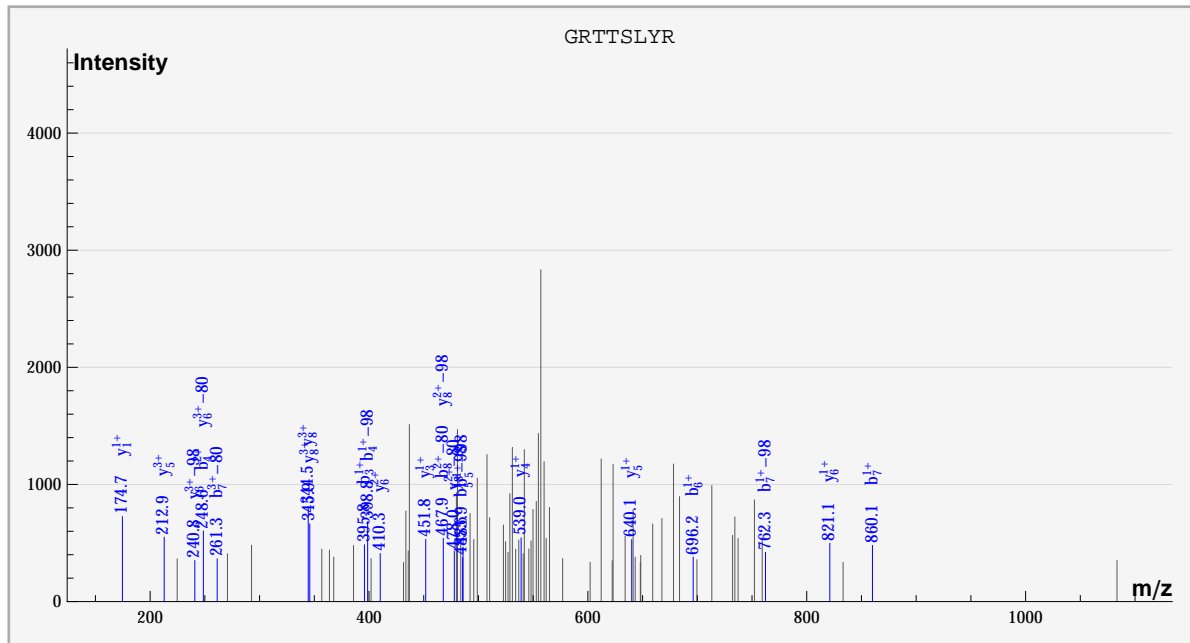

|   | # | b | b* | # | y | y* | P | P* |
|---|---|---|----|---|---|----|---|----|
| G | 1 |   |    |   |   |    | ✓ | ✓  |
| R | 2 |   |    | 7 |   |    |   |    |
| T | 3 | ✓ |    | 6 | ✓ | ✓  |   |    |
| T | 4 | ✓ | ✓  | 5 | ✓ |    |   |    |
| S | 5 |   | ✓  | 4 | ✓ |    |   |    |
| L | 6 | ✓ |    | 3 | ✓ |    |   |    |
| Y | 7 | ✓ | ✓  | 2 |   |    |   |    |
| R | 8 |   | ✓  | 1 | ✓ |    |   |    |

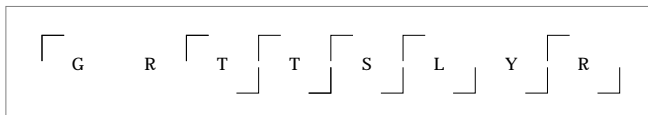

dbValid true ETLNLASK PHOS(2) 2. 518. 0.211577 5.00264 100. ? 3918.  
 S\_Acido\_new%gi|68568015|gb|AAy80944.1| ETLNLASK%::PHOS:::PHOS::%sample\_0%cmpd\_2473

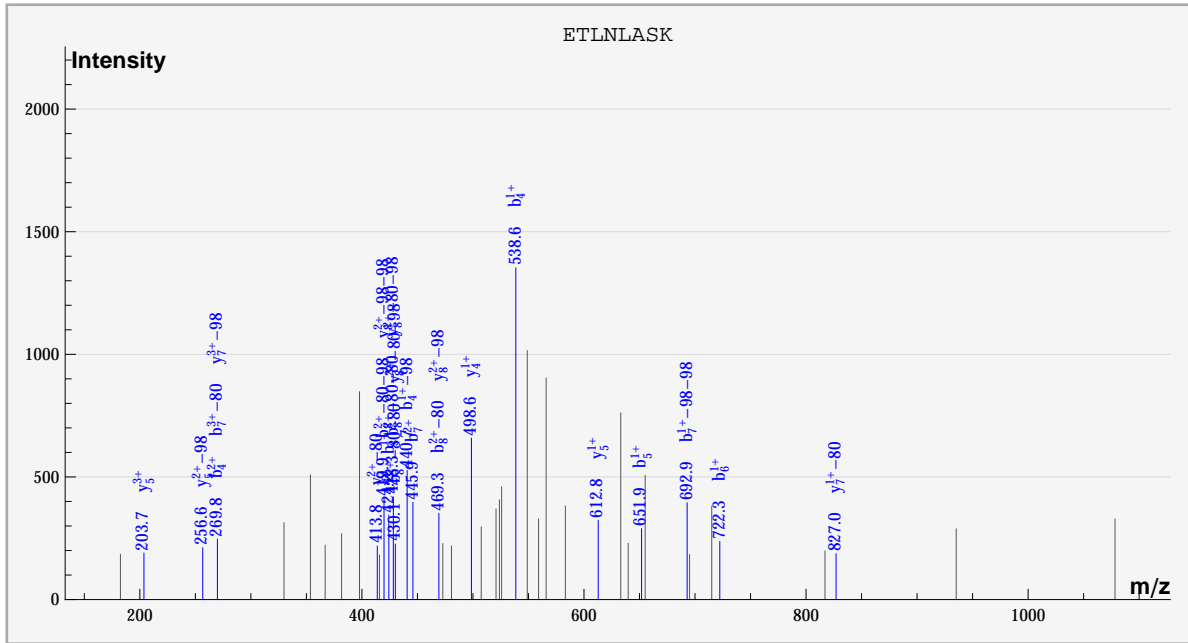

|   | # | b | b* | # | y | y* | P | P* |
|---|---|---|----|---|---|----|---|----|
| E | 1 |   |    |   |   |    |   | ✓  |
| T | 2 |   |    | 7 |   | ✓  |   |    |
| L | 3 | ✓ |    | 6 |   |    |   |    |
| N | 4 | ✓ | ✓  | 5 | ✓ | ✓  |   |    |
| L | 5 | ✓ |    | 4 | ✓ |    |   |    |
| A | 6 | ✓ |    | 3 |   |    |   |    |
| S | 7 | ✓ | ✓  | 2 |   |    |   |    |
| K | 8 |   | ✓  | 1 |   |    |   |    |

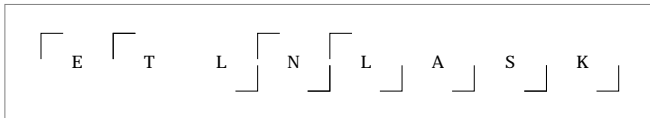

dbValid true EIVWDYK PHOS(1) 2. 518. -1.27448 4.94237 100. ? 594.  
 S\_Acido\_new%gi|68567120|gb|AAY80049.1| EIVWDYK%:::PHOS::%sample\_0%compd\_3844

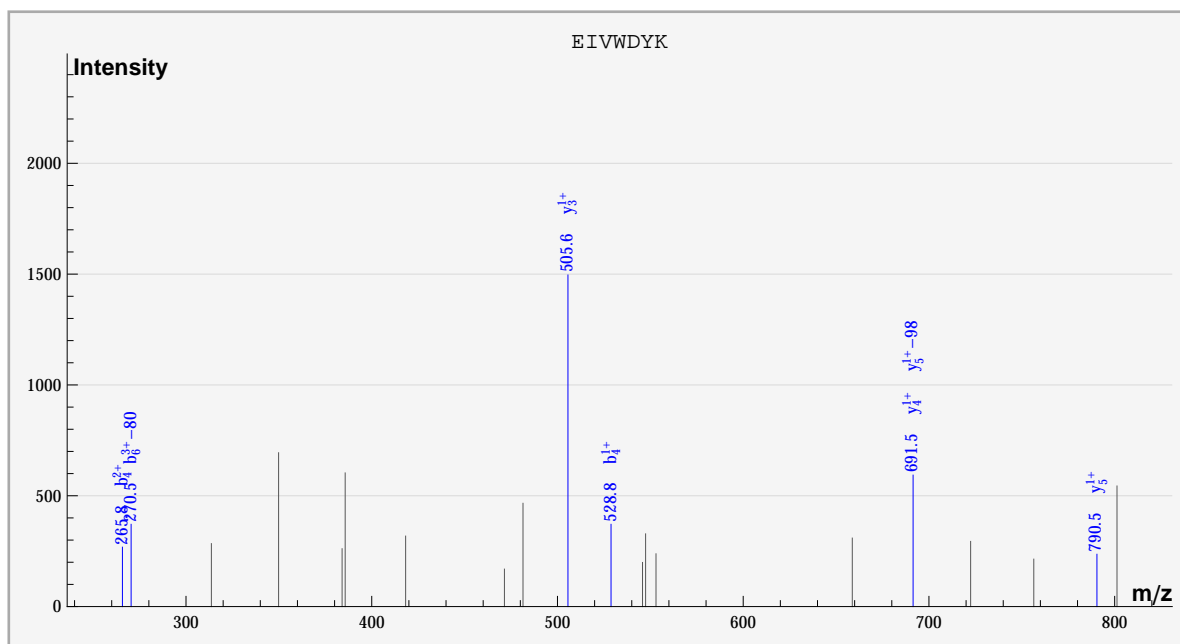

|   | # | b | b* | # | y | y* | P | P* |
|---|---|---|----|---|---|----|---|----|
| E | 1 |   |    |   |   |    |   |    |
| I | 2 |   |    | 6 |   |    |   |    |
| V | 3 |   |    | 5 | ✓ | ✓  |   |    |
| W | 4 | ✓ |    | 4 | ✓ |    |   |    |
| D | 5 |   |    | 3 | ✓ |    |   |    |
| Y | 6 |   | ✓  | 2 |   |    |   |    |
| K | 7 |   |    | 1 |   |    |   |    |

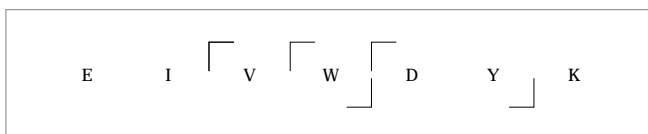

dbValid true EYYEKAR PHOS(1) 2. 519. 0.718227 4.9821 100. ? 1908.

S\_Acido\_new%gi|68567460|gb|AAY80389.1| EYYEKAR%::PHOS:::sample\_2%compd\_609

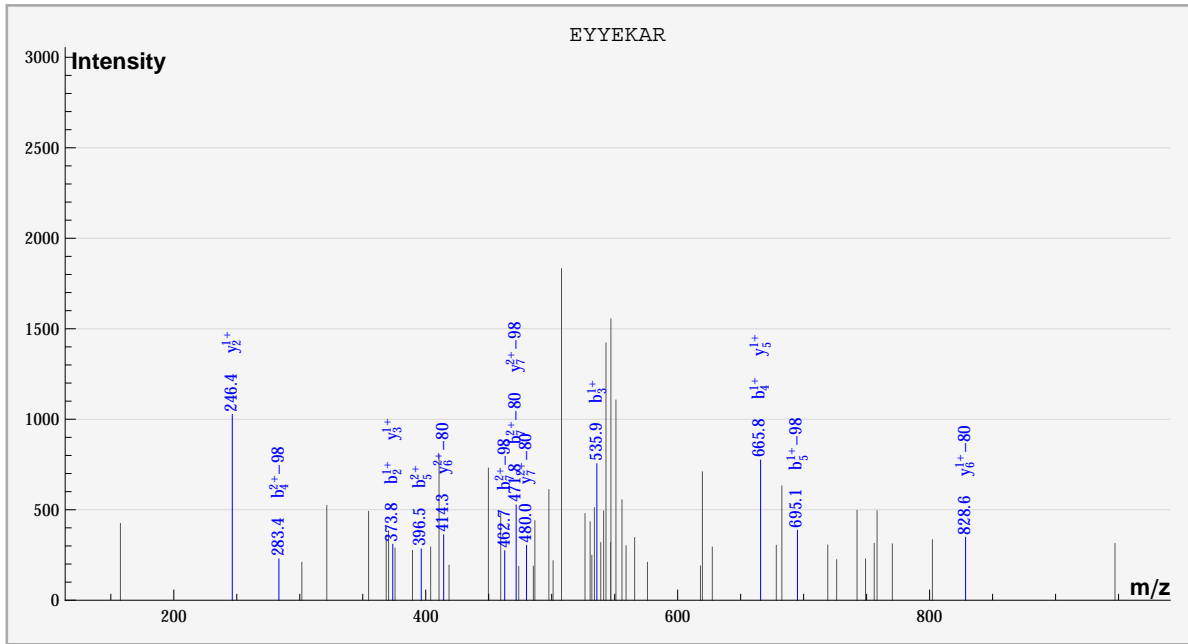

|   | # | b | b* | # | y | y* | P | P* |
|---|---|---|----|---|---|----|---|----|
| E | 1 |   |    |   |   |    |   | ✓  |
| Y | 2 | ✓ |    | 6 |   | ✓  |   |    |
| Y | 3 | ✓ |    | 5 | ✓ |    |   |    |
| E | 4 | ✓ | ✓  | 4 |   |    |   |    |
| K | 5 | ✓ | ✓  | 3 | ✓ |    |   |    |
| A | 6 |   |    | 2 | ✓ |    |   |    |
| R | 7 |   | ✓  | 1 |   |    |   |    |

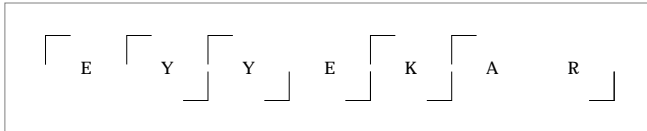

dbValid true EVENASRR PHOS(1) 2. 519. 1.72966 4.87177 100. ? 2148.  
 S\_Acido\_new%gi|68568174|gb|AAY81103.1| EVENASRR%:::::PHOS:::sample\_2%cmpd\_814

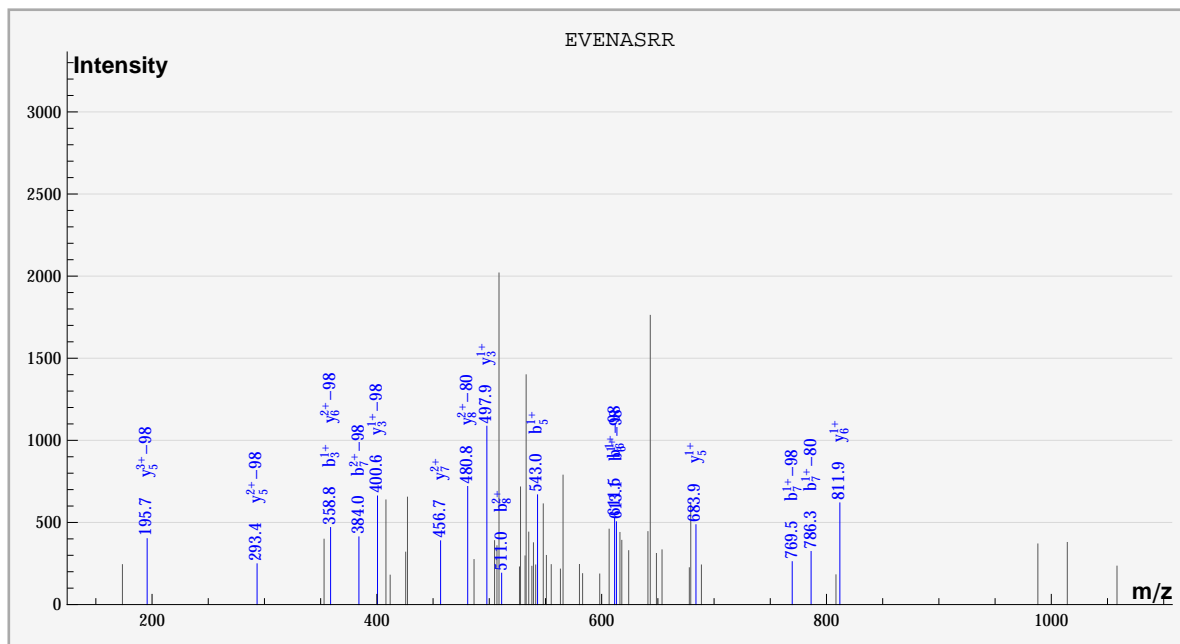

|   | # | b | b* | # | y | y* | P | P* |
|---|---|---|----|---|---|----|---|----|
| E | 1 |   |    |   |   |    |   | ✓  |
| V | 2 |   |    | 7 | ✓ |    |   |    |
| E | 3 | ✓ |    | 6 | ✓ | ✓  |   |    |
| N | 4 |   |    | 5 | ✓ | ✓  |   |    |
| A | 5 | ✓ |    | 4 |   |    |   |    |
| S | 6 |   | ✓  | 3 | ✓ | ✓  |   |    |
| R | 7 |   | ✓  | 2 |   |    |   |    |
| R | 8 | ✓ |    | 1 |   |    |   |    |

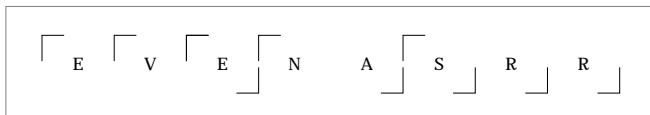



dbValid true YMVIMKR Oxidation\_M(1),PHOS(1) 2. 519. -0.260408 5.00948 100. ? 2994.  
 S\_Acido\_new%gil68568392|gb|AAY81321.1| YMVIMKR%:PHOS:::Oxidation\_M:::sample\_0%compd\_1623

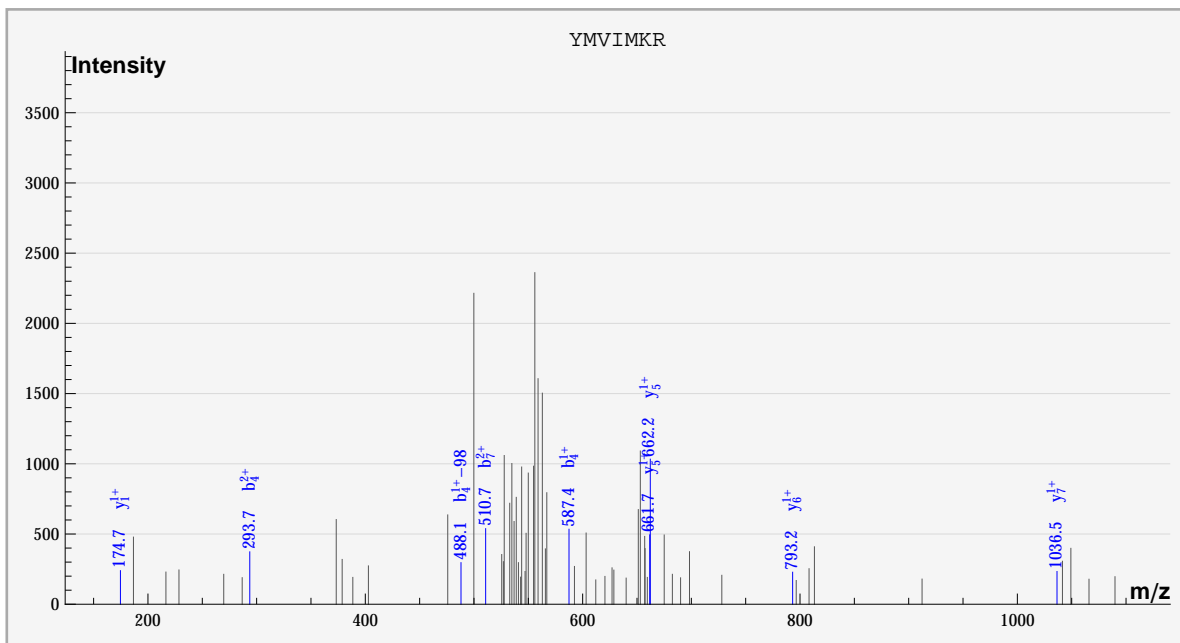

|   | # | b | b* | # | y | y* | P | P* |
|---|---|---|----|---|---|----|---|----|
| Y | 1 |   |    |   |   |    |   | ✓  |
| M | 2 |   |    | 6 | ✓ |    |   |    |
| V | 3 |   |    | 5 | ✓ |    |   |    |
| I | 4 | ✓ | ✓  | 4 |   |    |   |    |
| M | 5 |   |    | 3 |   |    |   |    |
| K | 6 |   |    | 2 |   |    |   |    |
| R | 7 | ✓ |    | 1 | ✓ |    |   |    |

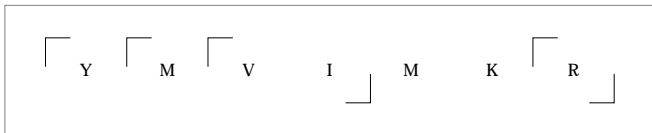

dbValid true YKVVTD PHOS(2) 2. 519. 1.71429 5.01785 100. ? 3114.  
 S\_Acido\_new%gi|68566803|gb|AA79732.1| YKVVTD:PHOS:::PHOS:::sample\_0%cmpd\_1733

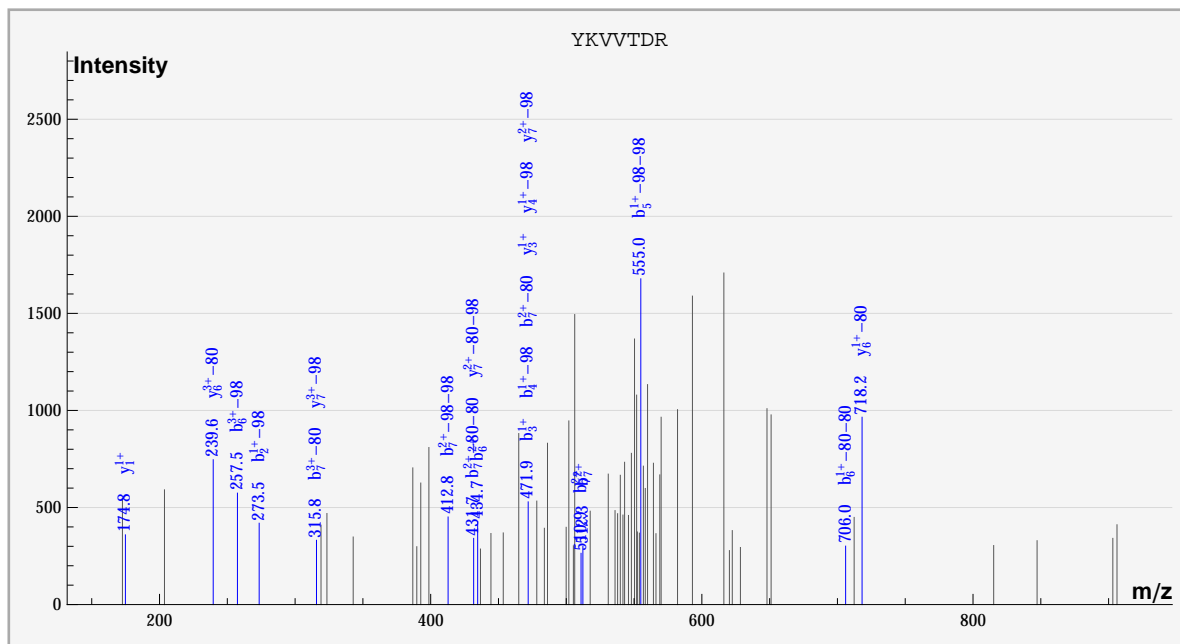

|   | # | b | b* | # | y | y* | P | P* |
|---|---|---|----|---|---|----|---|----|
| Y | 1 |   |    |   |   |    |   | ✓  |
| K | 2 |   | ✓  | 6 |   | ✓  |   |    |
| V | 3 | ✓ |    | 5 |   |    |   |    |
| V | 4 |   | ✓  | 4 |   | ✓  |   |    |
| T | 5 |   | ✓  | 3 |   | ✓  |   |    |
| D | 6 | ✓ | ✓  | 2 |   |    |   |    |
| R | 7 | ✓ | ✓  | 1 |   | ✓  |   |    |

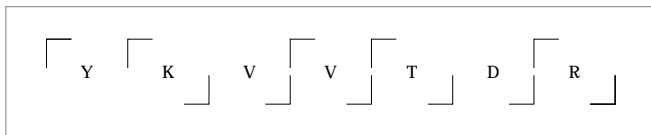

dbValid true RSLKTLR PHOS(2) 2. 519. -1.74863 4.93417 100. ? 3618.  
 S\_Acido\_new%gi|68568540|gb|AAy81469.1| RSLKTLR::PHOS::PHOS::%sample\_0%compd\_2199

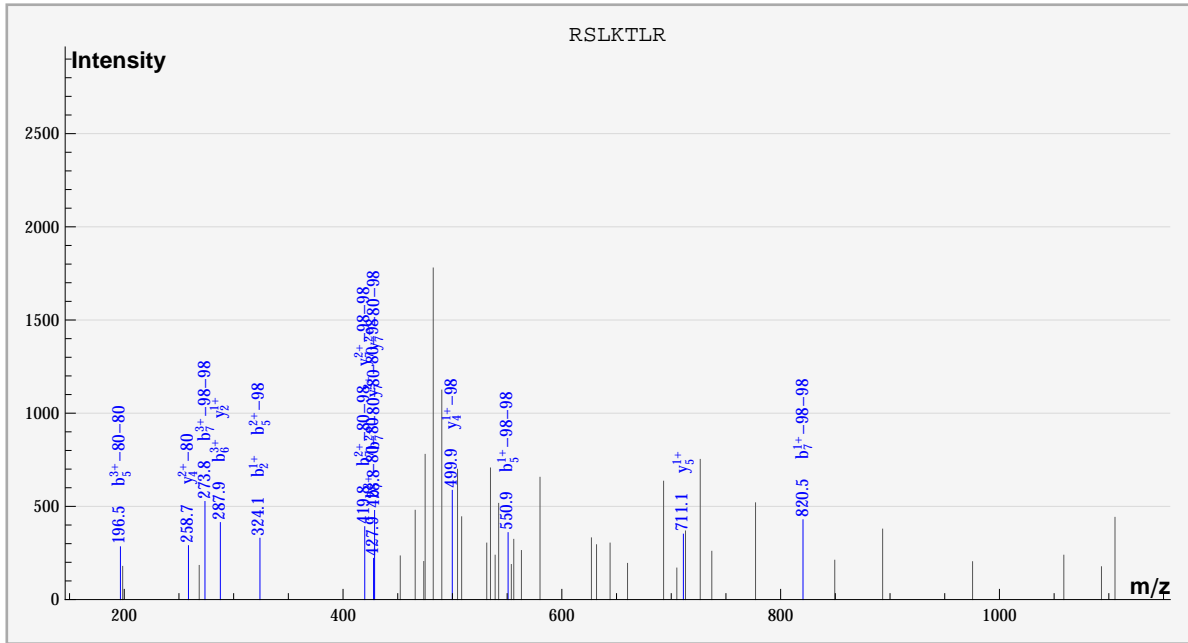

|   | # | b | b* | # | y | y* | P | P* |
|---|---|---|----|---|---|----|---|----|
| R | 1 |   |    |   |   |    |   | ✓  |
| S | 2 | ✓ |    | 6 |   |    |   |    |
| L | 3 |   |    | 5 | ✓ |    |   |    |
| K | 4 |   |    | 4 |   | ✓  |   |    |
| T | 5 |   | ✓  | 3 |   |    |   |    |
| L | 6 | ✓ |    | 2 | ✓ |    |   |    |
| R | 7 |   | ✓  | 1 |   |    |   |    |

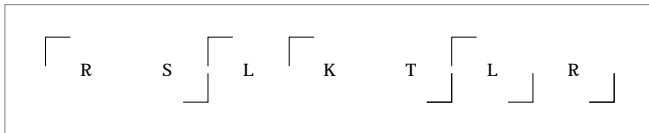

dbValid true GTSVECVK Cys\_CAM(1),PHOS(2) 2. 519. 1.18196 5.98518 100. ? 3630.  
 S\_Acido\_new%gil68568246|gb|AAY81175.1| GTSVECVK%::PHOS:PHOS::Cys\_CAM:::sample\_0%compd\_2210

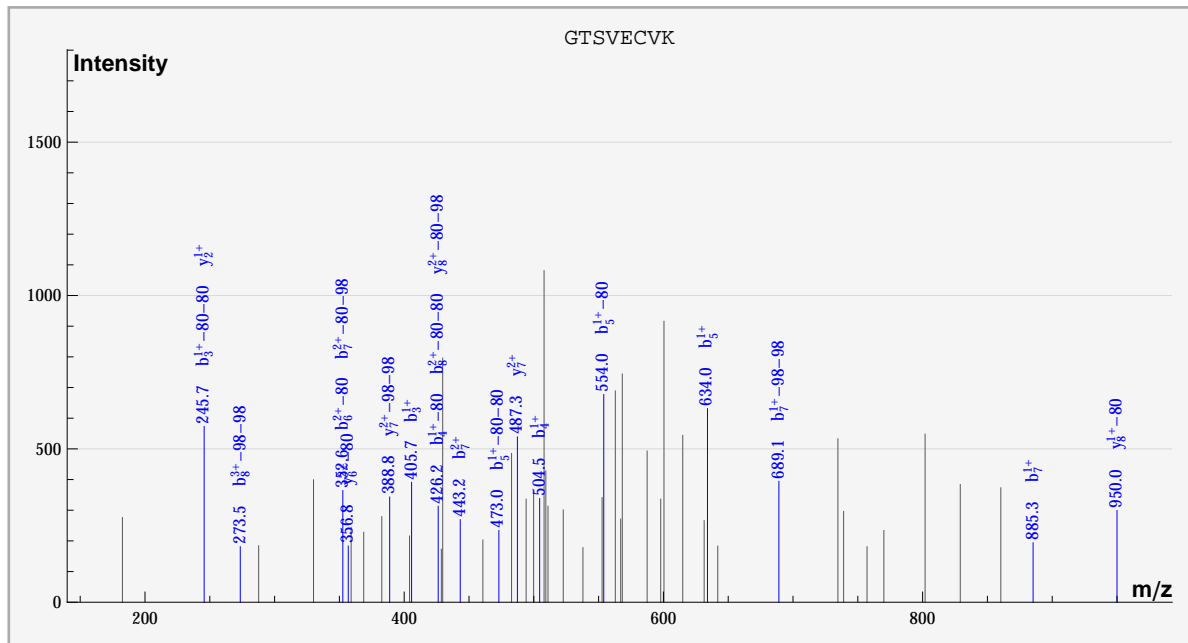

|   | # | b | b* | # | y | y* | P | P* |
|---|---|---|----|---|---|----|---|----|
| G | 1 |   |    |   |   |    |   | ✓  |
| T | 2 |   |    | 7 | ✓ | ✓  |   |    |
| S | 3 | ✓ | ✓  | 6 |   | ✓  |   |    |
| V | 4 | ✓ | ✓  | 5 |   |    |   |    |
| E | 5 | ✓ | ✓  | 4 |   |    |   |    |
| C | 6 |   | ✓  | 3 |   |    |   |    |
| V | 7 | ✓ | ✓  | 2 | ✓ |    |   |    |
| K | 8 |   | ✓  | 1 |   |    |   |    |

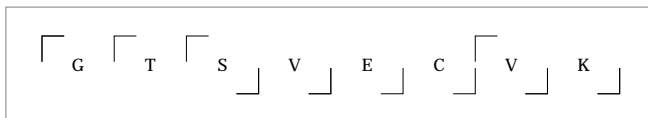

dbValid true YSWQNKK PHOS(1) 2. 519. -1.77123 4.92927 100. ? 4488.  
 S\_Acido\_new%gi|68567101|gb|AAY80030.1| YSWQNKK%:PHOS:::sample\_0%cmpd\_2995

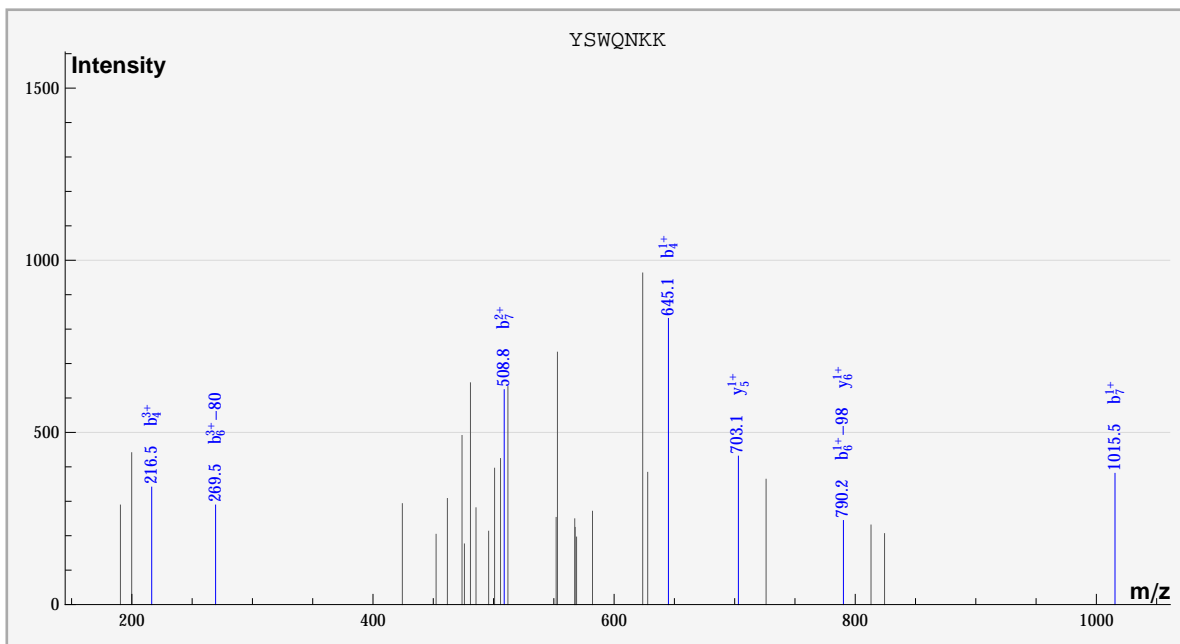

|   | # | b | b* | # | y | y* | P | P* |
|---|---|---|----|---|---|----|---|----|
| Y | 1 |   |    |   |   |    |   |    |
| S | 2 |   |    | 6 | ✓ |    |   |    |
| W | 3 |   |    | 5 | ✓ |    |   |    |
| Q | 4 | ✓ |    | 4 |   |    |   |    |
| N | 5 |   |    | 3 |   |    |   |    |
| K | 6 |   | ✓  | 2 |   |    |   |    |
| K | 7 | ✓ |    | 1 |   |    |   |    |

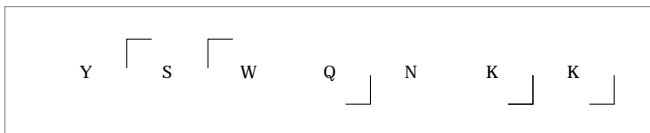

dbValid true IYQAKR PHOS(2) 2. 521. -0.777718 5.03013 100. ? 1326.  
 S\_Acido\_new%gil68567587|gb|AAY80516.1| IYQAKR%::PHOS:PHOS::::%sample\_2%cmpd\_92

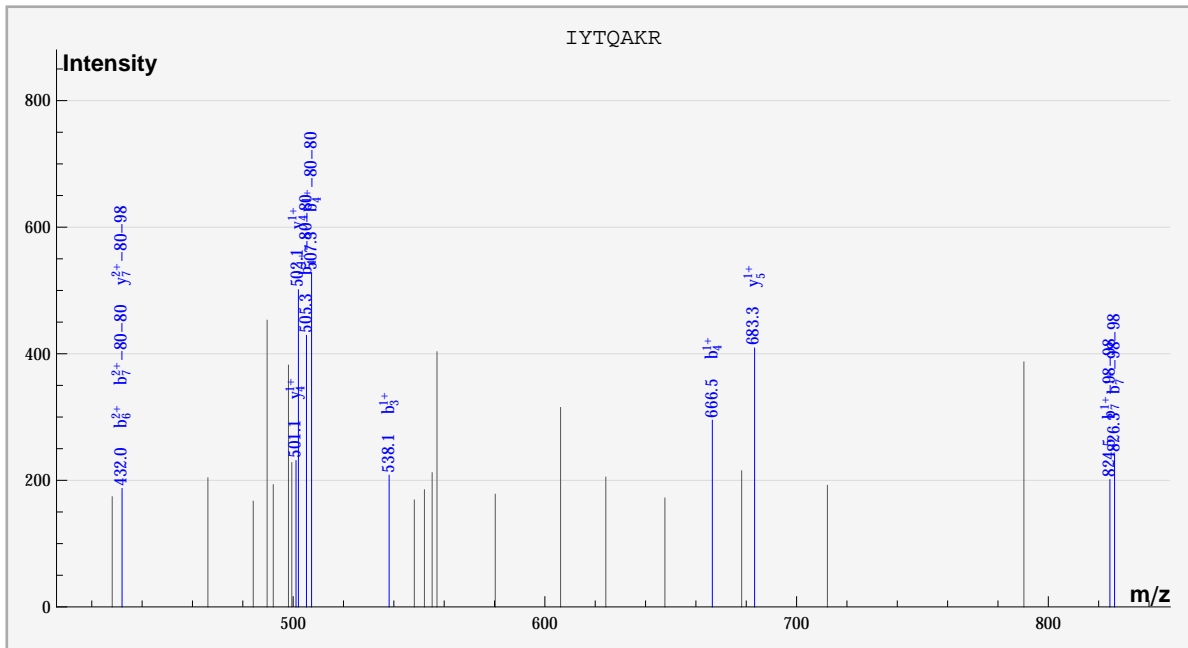

|   | # | b | b* | # | y | y* | P | P* |
|---|---|---|----|---|---|----|---|----|
| I | 1 |   |    |   |   |    |   | ✓  |
| Y | 2 |   |    | 6 |   |    |   |    |
| T | 3 | ✓ |    | 5 | ✓ |    |   |    |
| Q | 4 | ✓ | ✓  | 4 | ✓ |    |   |    |
| A | 5 |   |    | 3 |   |    |   |    |
| K | 6 | ✓ |    | 2 |   |    |   |    |
| R | 7 |   | ✓  | 1 |   |    |   |    |

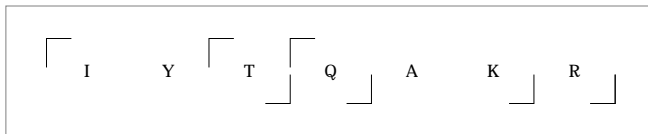

dbValid true TSRTVYR PHOS(2) 2. 521. 0.709542 4.94768 100. ? 1422.

S\_Acido\_new%gi|68567579|gb|AA80508.1| TSRTVYR%:PHOS::::PHOS::%sample\_3%cmpd\_179

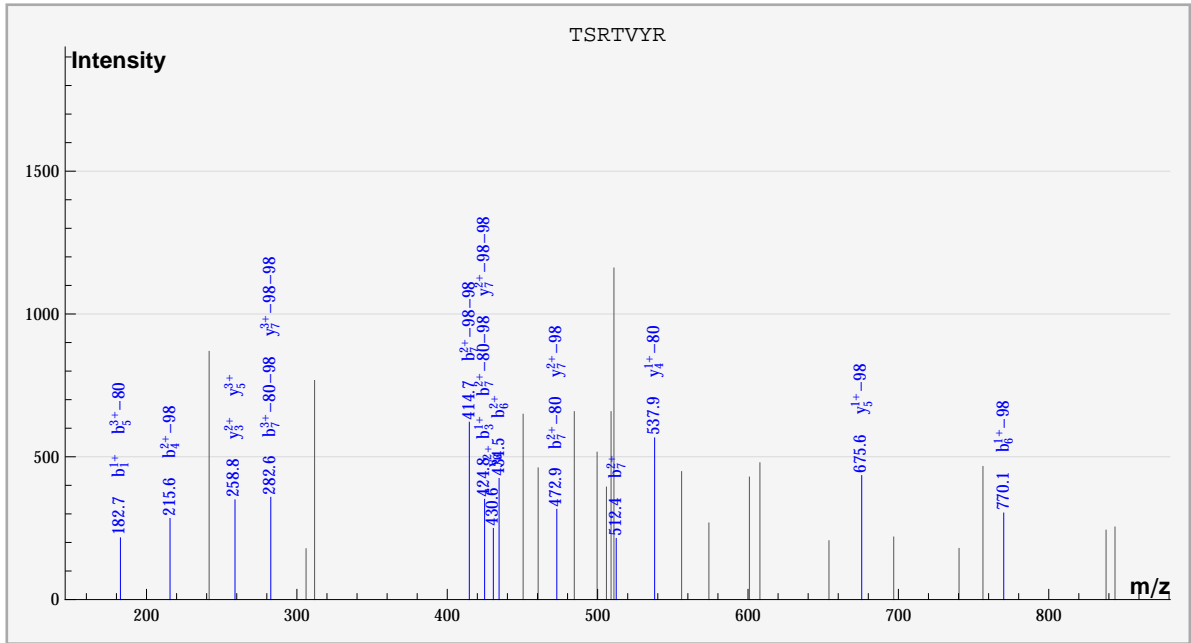

|   | # | b | b* | # | y | y* | P | P* |
|---|---|---|----|---|---|----|---|----|
| T | 1 | ✓ |    |   |   |    |   | ✓  |
| S | 2 |   |    | 6 | ✓ |    |   |    |
| R | 3 | ✓ |    | 5 | ✓ | ✓  |   |    |
| T | 4 |   | ✓  | 4 |   | ✓  |   |    |
| V | 5 |   | ✓  | 3 | ✓ |    |   |    |
| Y | 6 | ✓ | ✓  | 2 |   |    |   |    |
| R | 7 | ✓ | ✓  | 1 |   |    |   |    |

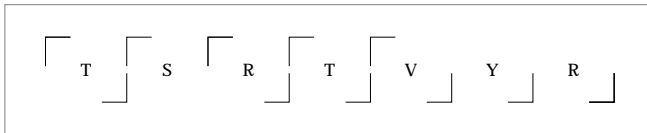

dbValid true MRIYSSK PHOS(2) 2. 521. 1.70287 5.49754 100. ? 1974.  
 S\_Acido\_new%gi|68566514|gb|AA79443.1| MRIYSSK%::::PHOS:PHOS:::%sample\_0%compd\_658

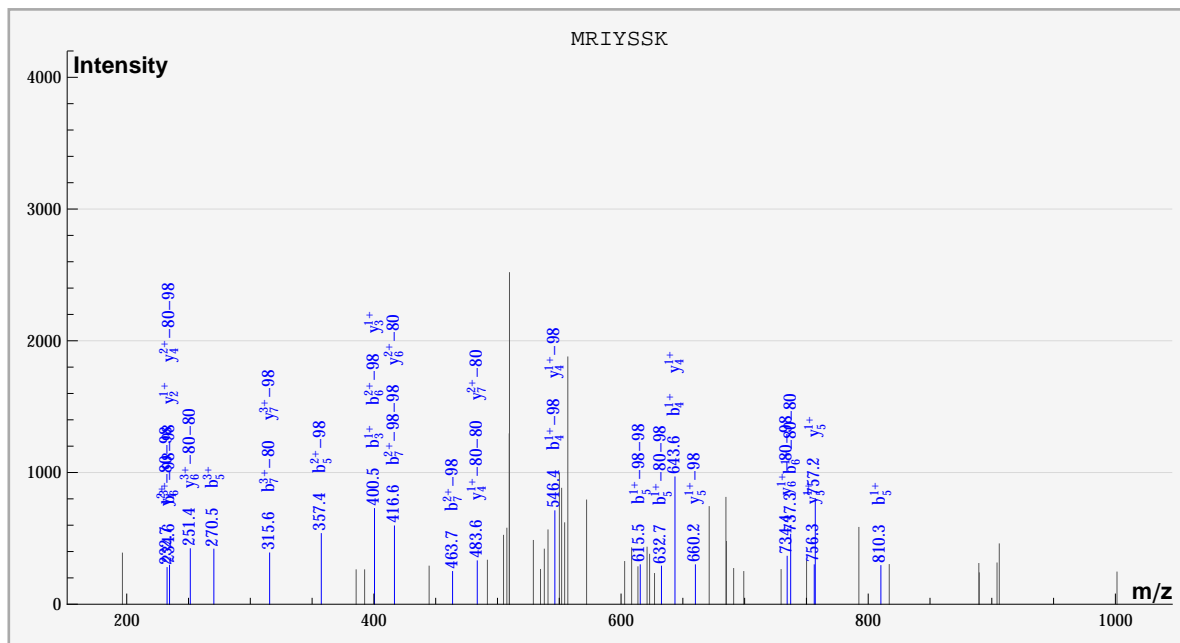

|   | # | b | b* | # | y | y* | P | P* |
|---|---|---|----|---|---|----|---|----|
| M | 1 |   |    |   |   |    |   | ✓  |
| R | 2 |   |    | 6 |   | ✓  |   |    |
| I | 3 | ✓ |    | 5 | ✓ | ✓  |   |    |
| Y | 4 | ✓ | ✓  | 4 | ✓ | ✓  |   |    |
| S | 5 | ✓ | ✓  | 3 | ✓ |    |   |    |
| S | 6 |   | ✓  | 2 | ✓ |    |   |    |
| K | 7 |   | ✓  | 1 |   |    |   |    |

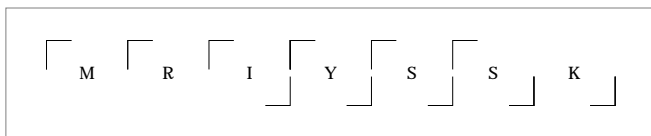



dbValid true KLDTIIVR PHOS(1) 2. 521. -1.70864 5.23764 100. ? 2382.  
 S\_Acido\_new%gi|68567557|gb|AAY80486.1| KLDTIIVR%::::PHOS::::%sample\_3%compd\_1039

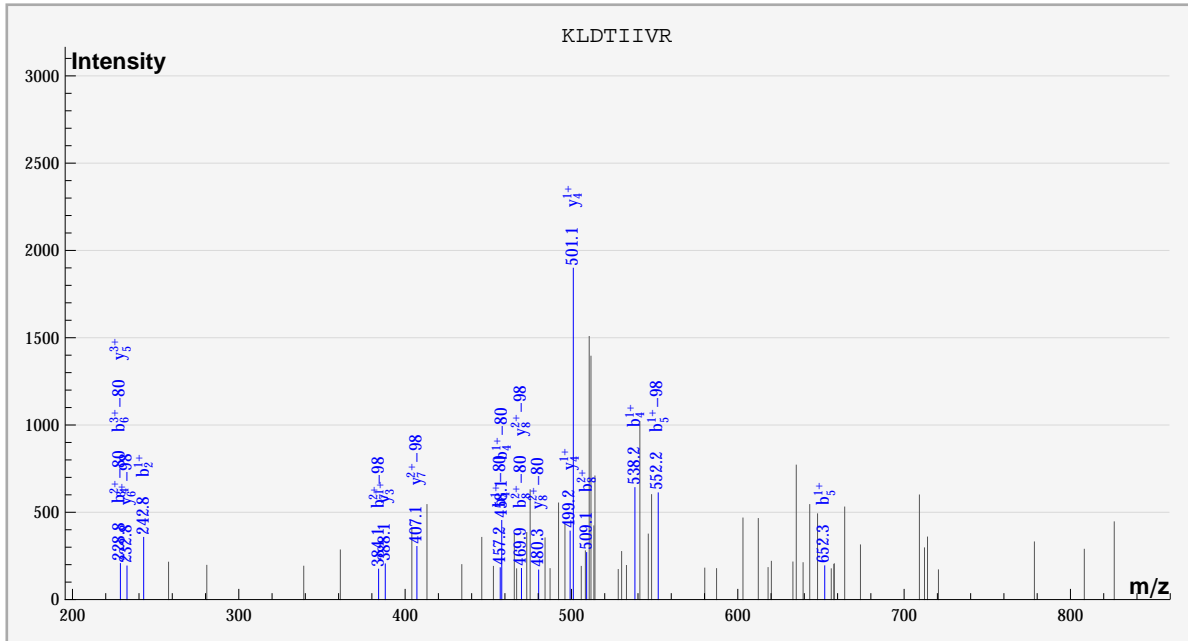

|   | # | b | b* | # | y | y* | P | P* |
|---|---|---|----|---|---|----|---|----|
| K | 1 |   |    |   |   |    |   | ✓  |
| L | 2 | ✓ |    | 7 |   | ✓  |   |    |
| D | 3 |   |    | 6 |   | ✓  |   |    |
| T | 4 | ✓ | ✓  | 5 | ✓ |    |   |    |
| I | 5 | ✓ | ✓  | 4 | ✓ |    |   |    |
| I | 6 |   | ✓  | 3 | ✓ |    |   |    |
| V | 7 |   | ✓  | 2 |   |    |   |    |
| R | 8 | ✓ | ✓  | 1 |   |    |   |    |

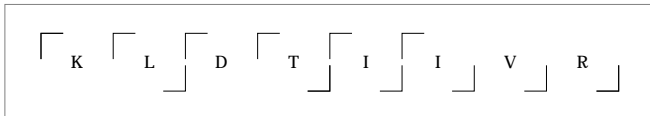

dbValid true TTLDTLSK PHOS(2) 2. 521. -1.28859 5.0307 100. ? 3438.  
 S\_Acido\_new%gii68568251|gb|AAY81180.1| TTLDTLSK%:PHOS:PHOS:::sample\_3%cmpd\_2023

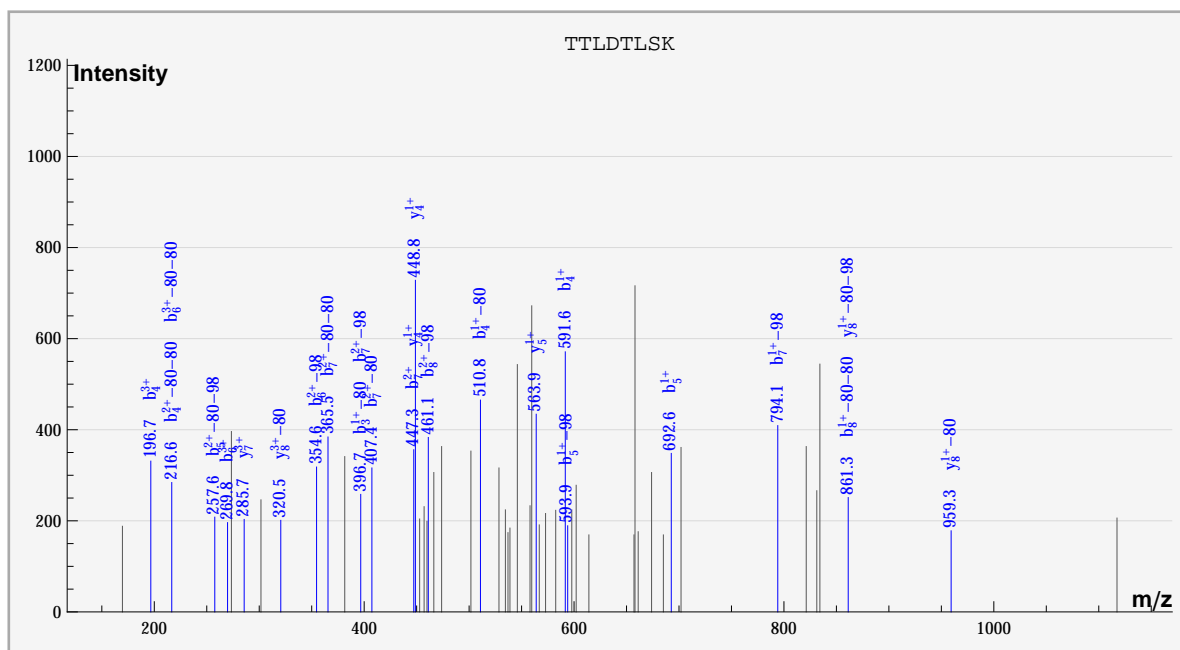

|   | # | b | b* | # | y | y* | P | P* |
|---|---|---|----|---|---|----|---|----|
| T | 1 |   |    |   |   |    |   | ✓  |
| T | 2 |   |    | 7 | ✓ |    |   |    |
| L | 3 | ✓ |    | 6 |   |    |   |    |
| D | 4 | ✓ | ✓  | 5 | ✓ |    |   |    |
| T | 5 | ✓ | ✓  | 4 | ✓ |    |   |    |
| L | 6 | ✓ | ✓  | 3 |   |    |   |    |
| S | 7 | ✓ | ✓  | 2 |   |    |   |    |
| K | 8 |   | ✓  | 1 |   |    |   |    |

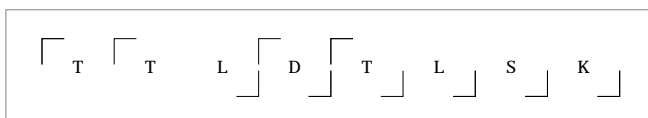

dbValid true TISQQEEK PHOS(1) 2. 521. 0.726252 5.06092 100. ? 3570.  
 S\_Acido\_new%gi|68567996|gb|AAY80925.1| TISQQEEK%:::PHOS:::sample\_3%compd\_2144

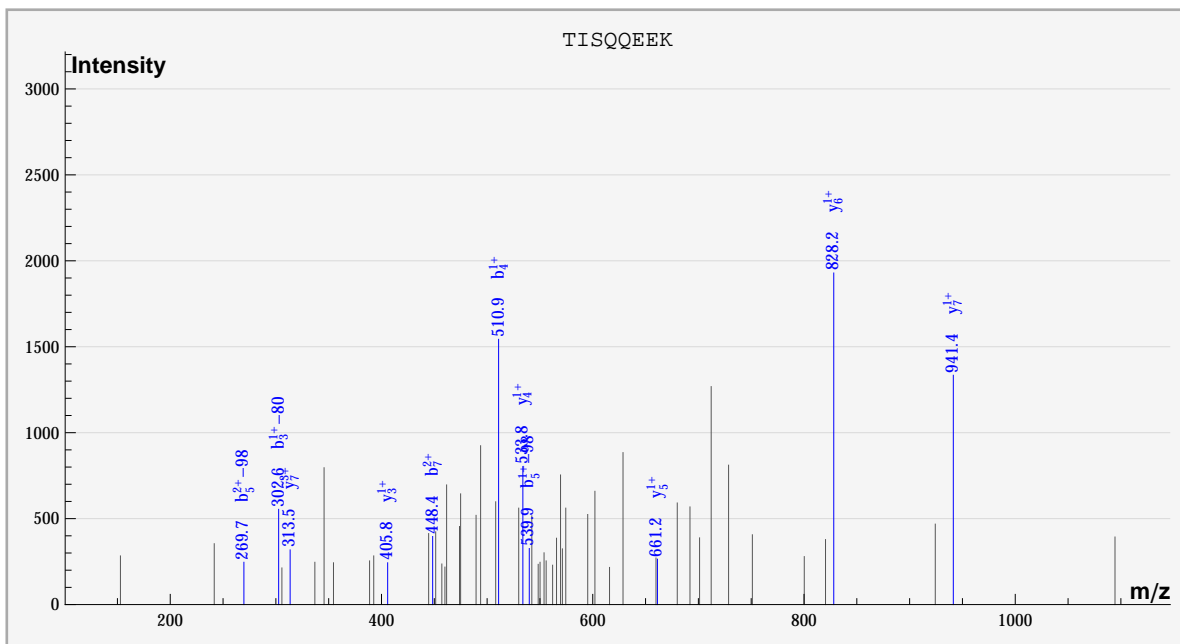

|   | # | b | b* | # | y | y* | P | P* |
|---|---|---|----|---|---|----|---|----|
| T | 1 |   |    |   |   |    |   |    |
| I | 2 |   |    | 7 |   | ✓  |   |    |
| S | 3 |   | ✓  | 6 |   | ✓  |   |    |
| Q | 4 | ✓ |    | 5 |   | ✓  |   |    |
| Q | 5 |   | ✓  | 4 |   | ✓  |   |    |
| E | 6 |   |    | 3 |   | ✓  |   |    |
| E | 7 | ✓ |    | 2 |   |    |   |    |
| K | 8 |   |    | 1 |   |    |   |    |

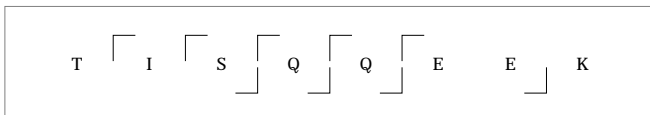

dbValid true YRVLSVPK PHOS(1) 2. 521. 0.278252 5.24723 100. ? 3990.  
 S\_Acido\_new%gi|68566827|gb|AAY79756.1| YRVLSVPK%:PHOS:::sample\_3%compd\_2529

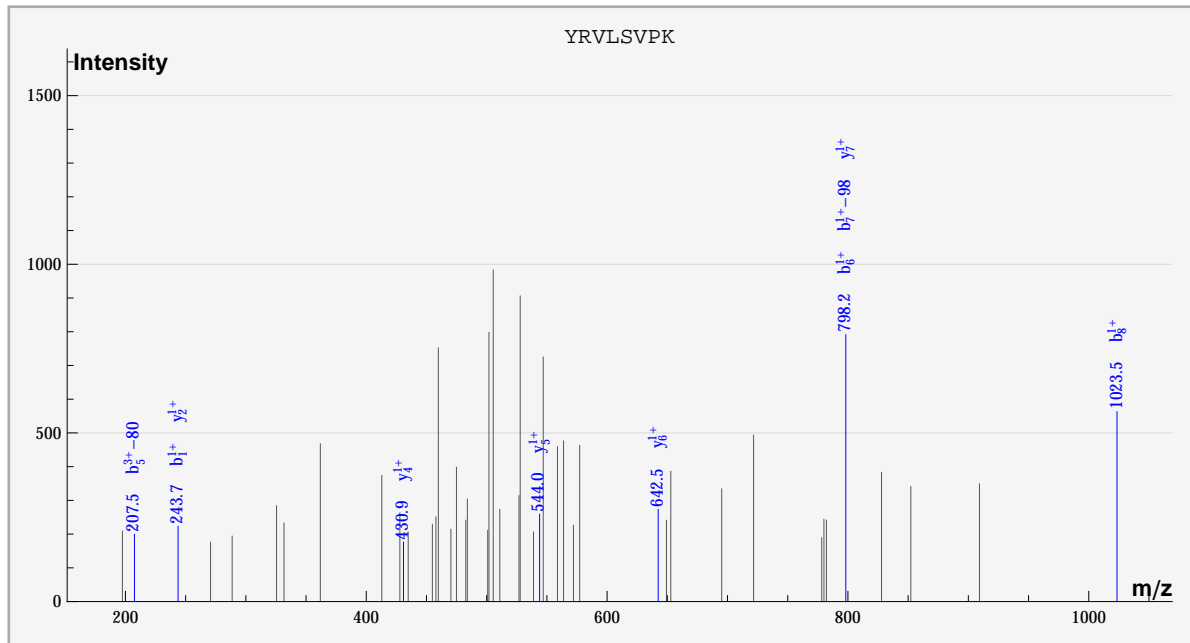

|   | # | b | b* | # | y | y* | P | P* |
|---|---|---|----|---|---|----|---|----|
| Y | 1 | ✓ |    |   |   |    |   |    |
| R | 2 |   |    | 7 | ✓ |    |   |    |
| V | 3 |   |    | 6 | ✓ |    |   |    |
| L | 4 |   |    | 5 | ✓ |    |   |    |
| S | 5 |   | ✓  | 4 | ✓ |    |   |    |
| V | 6 | ✓ |    | 3 |   |    |   |    |
| P | 7 |   | ✓  | 2 | ✓ |    |   |    |
| K | 8 | ✓ |    | 1 |   |    |   |    |

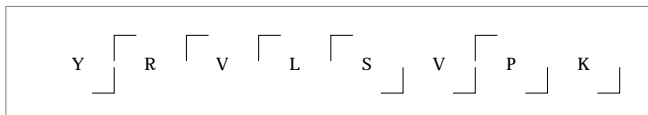

dbValid true KTVSSLSR PHOS(2) 2. 521. -1.77498 4.96301 100. ? 4818.  
 S\_Acido\_new%gi|68567921|gb|AAY80850.1| KTVSSLSR%::PHOS:::PHOS::%sample\_3%cmpd\_3105

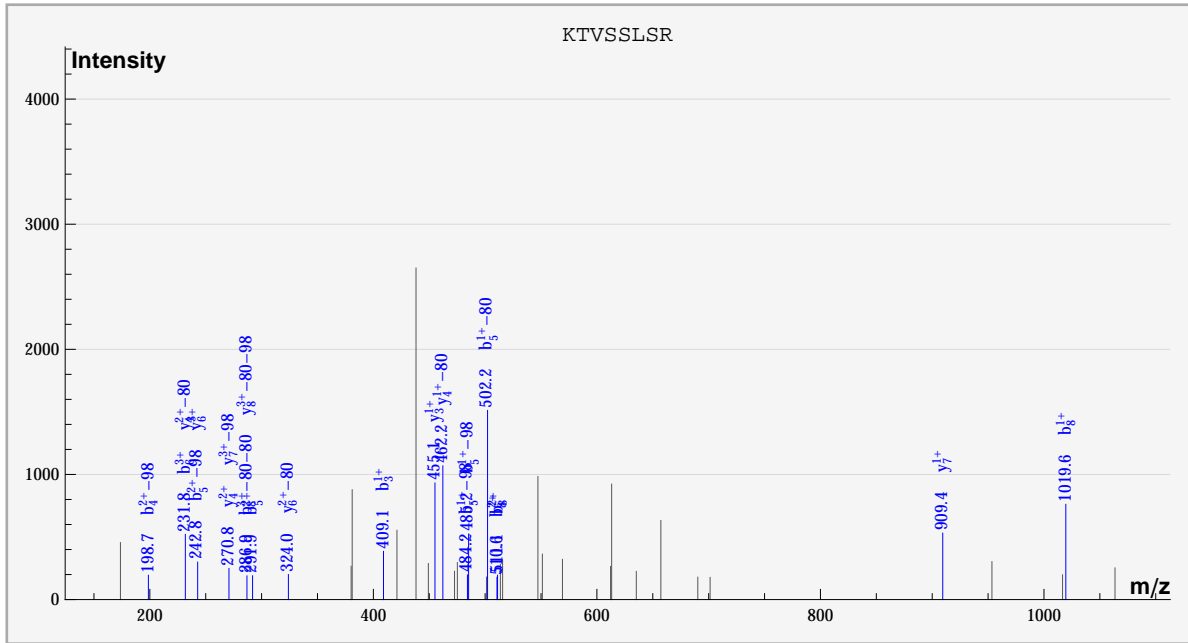

|   | # | b | b* | # | y | y* | P | P* |
|---|---|---|----|---|---|----|---|----|
| K | 1 |   |    |   |   |    |   | ✓  |
| T | 2 |   |    | 7 | ✓ | ✓  |   |    |
| V | 3 | ✓ |    | 6 | ✓ | ✓  |   |    |
| S | 4 |   | ✓  | 5 |   |    |   |    |
| S | 5 | ✓ | ✓  | 4 | ✓ | ✓  |   |    |
| L | 6 | ✓ |    | 3 | ✓ |    |   |    |
| S | 7 |   |    | 2 |   |    |   |    |
| R | 8 | ✓ | ✓  | 1 |   |    |   |    |

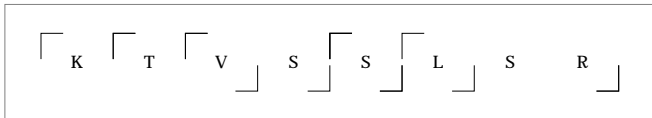

dbValid true RVKMLYSILQGT PHOS(2) 3. 522. 1.58175 5.24136 100. ? 1554.

S\_Acido\_new%gi|68567308|gb|AA80237.1| RVKMLYSILQGT%:::PHOS:::PHOS:%sample\_3%compd\_309

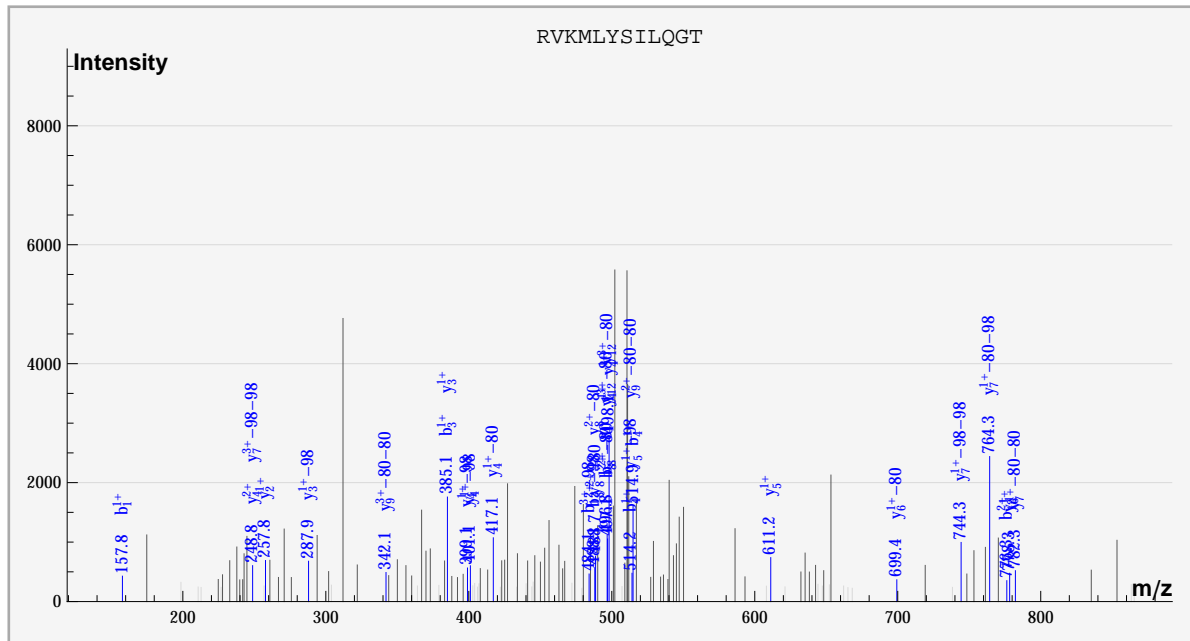

|   | #  | b | b* | #  | y | y* | P | P* |
|---|----|---|----|----|---|----|---|----|
| R | 1  | ✓ |    |    |   |    |   | ✓  |
| V | 2  |   |    | 11 |   |    |   |    |
| K | 3  | ✓ |    | 10 |   |    |   |    |
| M | 4  | ✓ |    | 9  |   | ✓  |   |    |
| L | 5  |   |    | 8  |   | ✓  |   |    |
| Y | 6  |   |    | 7  |   | ✓  |   |    |
| S | 7  |   |    | 6  | ✓ | ✓  |   |    |
| I | 8  | ✓ |    | 5  | ✓ | ✓  |   |    |
| L | 9  |   |    | 4  | ✓ | ✓  |   |    |
| Q | 10 |   |    | 3  | ✓ | ✓  |   |    |
| G | 11 |   |    | 2  | ✓ |    |   |    |
| T | 12 | ✓ | ✓  | 1  |   |    |   |    |

RVKMLYSILQGT

dbValid true RVKMLYSILQGT PHOS(2) 3. 522. 1.58175 5.50794 100. ? 1566.

S\_Acido\_new%gi|68567308|gb|AAY80237.1| RVKMLYSILQGT%:::PHOS:::PHOS:%sample\_3%compd\_319

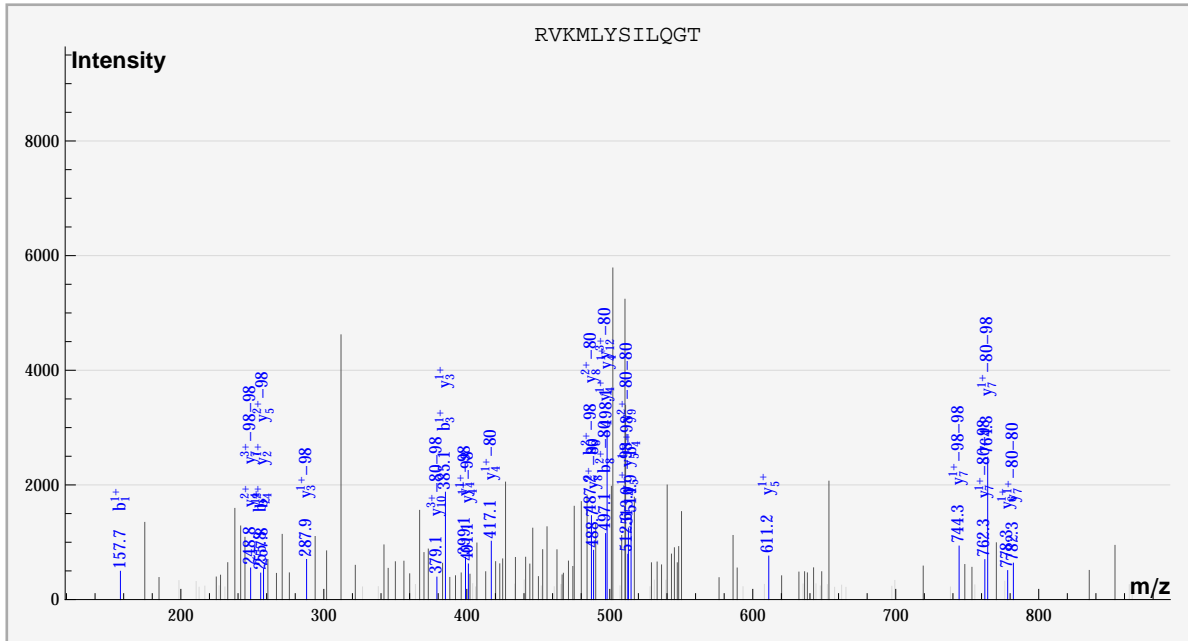

|   | #  | b | b* | #  | y | y* | P | P* |
|---|----|---|----|----|---|----|---|----|
| R | 1  | ✓ |    |    |   |    |   | ✓  |
| V | 2  | ✓ |    | 11 |   |    |   |    |
| K | 3  | ✓ |    | 10 |   | ✓  |   |    |
| M | 4  | ✓ |    | 9  |   | ✓  |   |    |
| L | 5  |   |    | 8  |   | ✓  |   |    |
| Y | 6  |   |    | 7  |   | ✓  |   |    |
| S | 7  |   |    | 6  | ✓ |    |   |    |
| I | 8  | ✓ |    | 5  | ✓ | ✓  |   |    |
| L | 9  |   |    | 4  | ✓ | ✓  |   |    |
| Q | 10 |   |    | 3  | ✓ | ✓  |   |    |
| G | 11 |   |    | 2  | ✓ |    |   |    |
| T | 12 |   |    | 1  |   |    |   |    |

R V K M L Y S I L Q G T

dbValid true RVKMLYSILQGT PHOS(2) 3. 522. 1.58175 5.40052 100. ? 1578.

S\_Acido\_new%gi|68567308|gb|AAY80237.1| RVKMLYSILQGT%::::::PHOS::::PHOS:%sample\_3%compd\_331

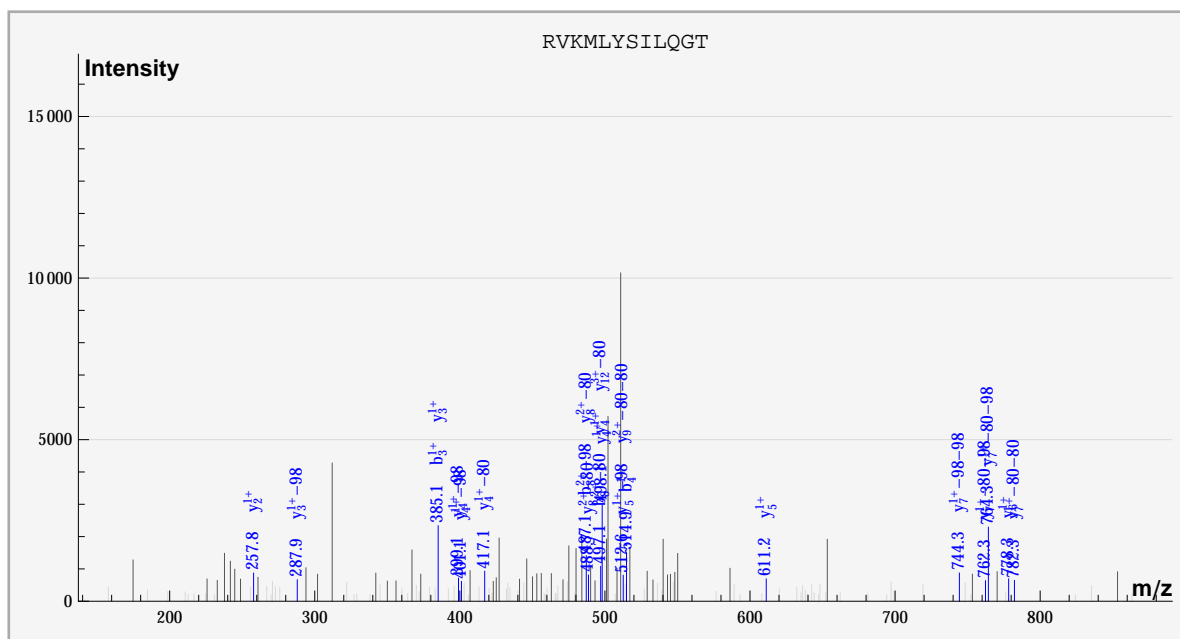

|   | #  | b | b* | #  | y | y* | P | P* |
|---|----|---|----|----|---|----|---|----|
| R | 1  |   |    |    |   |    |   | ✓  |
| V | 2  |   |    | 11 |   |    |   |    |
| K | 3  | ✓ |    | 10 |   |    |   |    |
| M | 4  | ✓ |    | 9  |   | ✓  |   |    |
| L | 5  |   |    | 8  |   | ✓  |   |    |
| Y | 6  |   |    | 7  |   | ✓  |   |    |
| S | 7  |   |    | 6  | ✓ |    |   |    |
| I | 8  | ✓ |    | 5  | ✓ | ✓  |   |    |
| L | 9  |   |    | 4  | ✓ | ✓  |   |    |
| Q | 10 |   |    | 3  | ✓ | ✓  |   |    |
| G | 11 |   |    | 2  | ✓ |    |   |    |
| T | 12 |   |    | 1  |   |    |   |    |

R V K M L Y S I L Q G T



dbValid true KIVTEITR PHOS(1) 2. 522. -1.71901 6.04322 100. ? 1596.

S\_Acido\_new%gi68568184|gb|AAY81113.1| KIVTEITR%::::::PHOS::%sample\_3%compd\_332

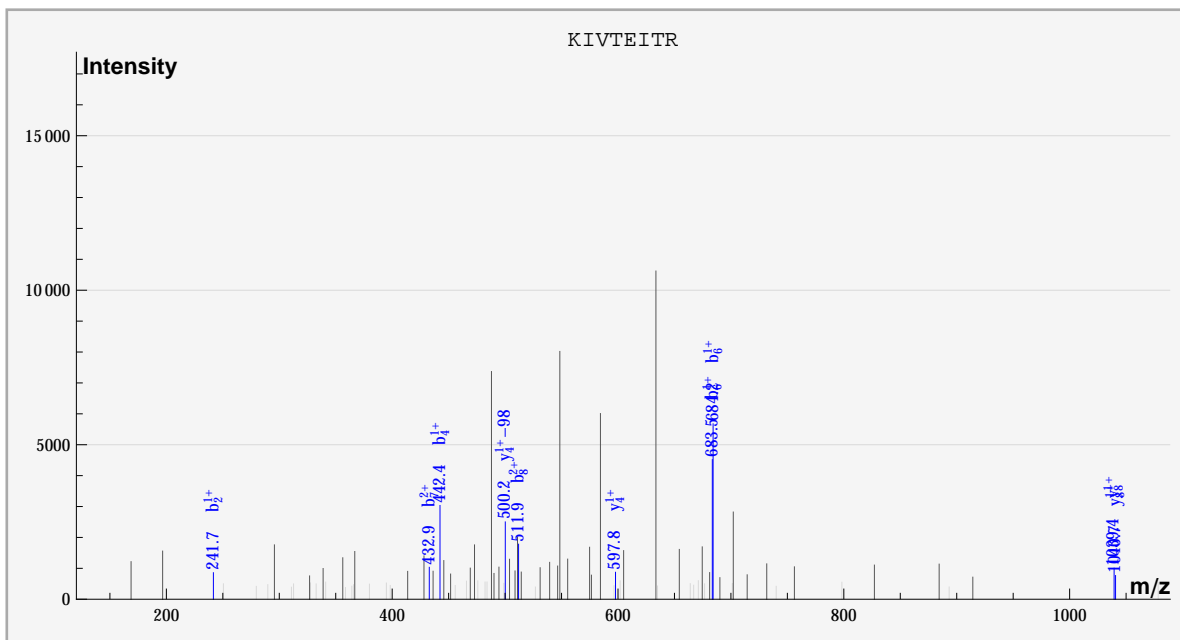

|   | # | b | b* | # | y | y* | P | P* |
|---|---|---|----|---|---|----|---|----|
| K | 1 |   |    |   |   |    |   | ✓  |
| I | 2 | ✓ |    | 7 |   |    |   |    |
| V | 3 |   |    | 6 |   |    |   |    |
| T | 4 | ✓ |    | 5 |   |    |   |    |
| E | 5 |   |    | 4 | ✓ | ✓  |   |    |
| I | 6 | ✓ |    | 3 |   |    |   |    |
| T | 7 | ✓ |    | 2 |   |    |   |    |
| R | 8 | ✓ |    | 1 |   |    |   |    |

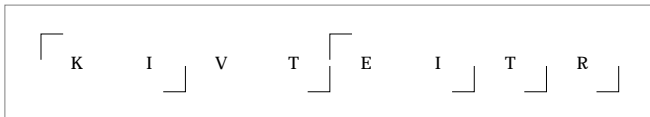

dbValid true RVKMLYSILQGT PHOS(2) 3. 522. 1.58175 5.51858 100. ? 1614.

S\_Acido\_new%gi|68567308|gb|AAV80237.1| RVKMLYSILQGT%::::::PHOS::::PHOS:%sample\_3%compd\_363

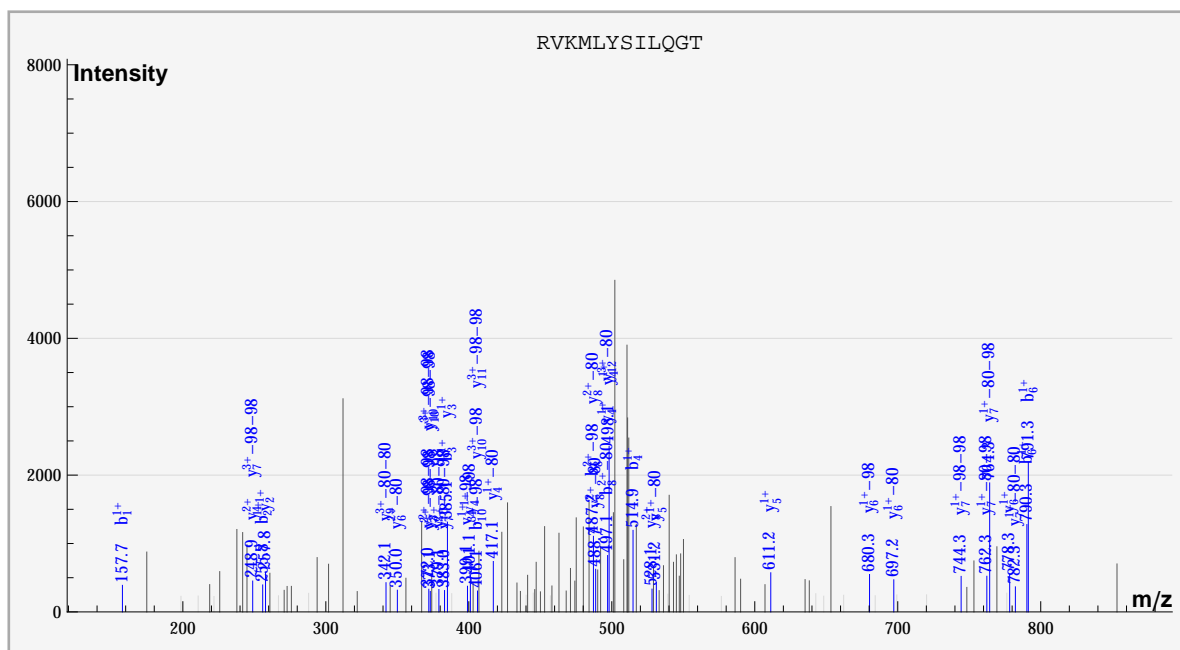

|   | #  | b | b* | #  | y | y* | P | P* |
|---|----|---|----|----|---|----|---|----|
| R | 1  | ✓ |    |    |   |    |   | ✓  |
| V | 2  | ✓ |    | 11 |   | ✓  |   |    |
| K | 3  | ✓ |    | 10 |   | ✓  |   |    |
| M | 4  | ✓ |    | 9  |   | ✓  |   |    |
| L | 5  |   |    | 8  | ✓ | ✓  |   |    |
| Y | 6  | ✓ |    | 7  |   | ✓  |   |    |
| S | 7  |   |    | 6  | ✓ | ✓  |   |    |
| I | 8  |   | ✓  | 5  | ✓ | ✓  |   |    |
| L | 9  |   |    | 4  | ✓ | ✓  |   |    |
| Q | 10 |   | ✓  | 3  | ✓ | ✓  |   |    |
| G | 11 |   |    | 2  |   | ✓  |   |    |
| T | 12 |   |    | 1  |   |    |   |    |

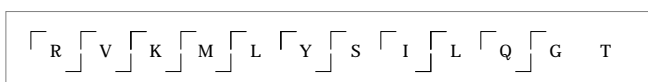

dbValid true RVKMLYSILQGT PHOS(2) 3. 522. 1.58175 5.09234 100. ? 1626.

S\_Acido\_new%gil68567308|gb|AAy80237.1| RVKMLYSILQGT%:::PHOS:::PHOS:%sample\_3%compd\_374

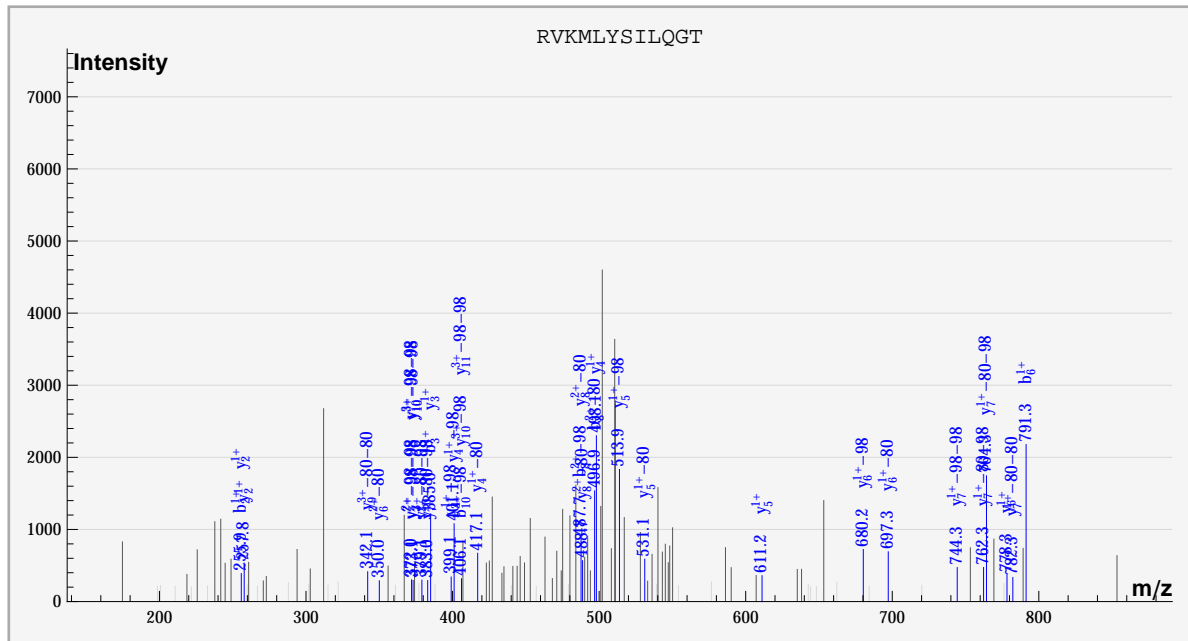

|   | #  | b | b* | #  | y | y* | P | P* |
|---|----|---|----|----|---|----|---|----|
| R | 1  |   |    |    |   |    |   |    |
| V | 2  | ✓ |    | 11 | ✓ |    |   |    |
| K | 3  | ✓ |    | 10 | ✓ |    |   |    |
| M | 4  |   |    | 9  | ✓ |    |   |    |
| L | 5  |   |    | 8  | ✓ |    |   |    |
| Y | 6  | ✓ |    | 7  | ✓ |    |   |    |
| S | 7  |   |    | 6  | ✓ | ✓  |   |    |
| I | 8  | ✓ |    | 5  | ✓ | ✓  |   |    |
| L | 9  |   |    | 4  | ✓ | ✓  |   |    |
| Q | 10 | ✓ |    | 3  | ✓ |    |   |    |
| G | 11 |   |    | 2  | ✓ |    |   |    |
| T | 12 |   |    | 1  |   |    |   |    |

R V K M L Y S I L Q G T

dbValid true LTSVVAITR PHOS(1) 2. 522. -1.71901 5.97057 100. ? 1794.  
 S\_Acido\_new%gi|68566521|gb|AAY79450.1| LTSVVAITR%:::PHOS::%sample\_0%cmpd\_502

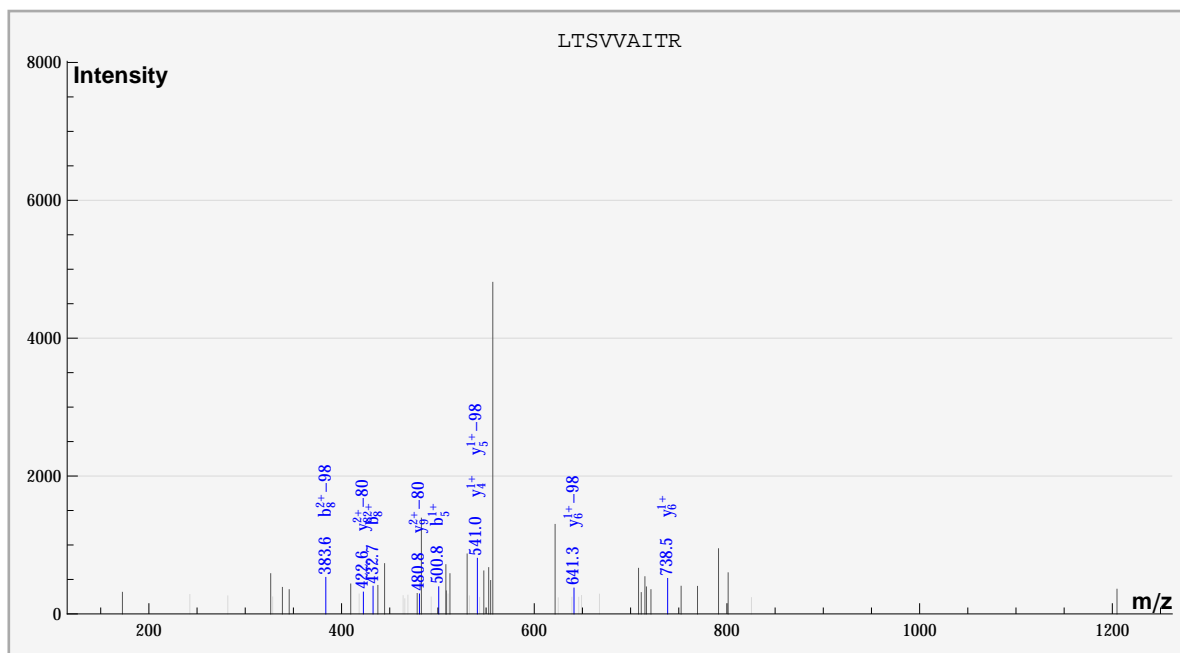

|   | # | b | b* | # | y | y* | P | P* |
|---|---|---|----|---|---|----|---|----|
| L | 1 |   |    |   |   |    |   | ✓  |
| T | 2 |   |    | 8 |   | ✓  |   |    |
| S | 3 |   |    | 7 |   |    |   |    |
| V | 4 |   |    | 6 | ✓ | ✓  |   |    |
| V | 5 | ✓ |    | 5 |   | ✓  |   |    |
| A | 6 |   |    | 4 | ✓ |    |   |    |
| I | 7 |   |    | 3 |   |    |   |    |
| T | 8 | ✓ | ✓  | 2 |   |    |   |    |
| R | 9 |   |    | 1 |   |    |   |    |

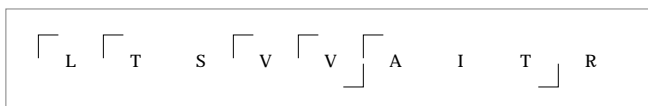

dbValid true RYISMGR PHOS(2) 2. 522. -0.299338 5.039 100. ? 2034.

S\_Acido\_new%gii68567715|gb|AAY80644.1| RYISMGR%::PHOS::PHOS:::%sample\_0%cmpd\_711

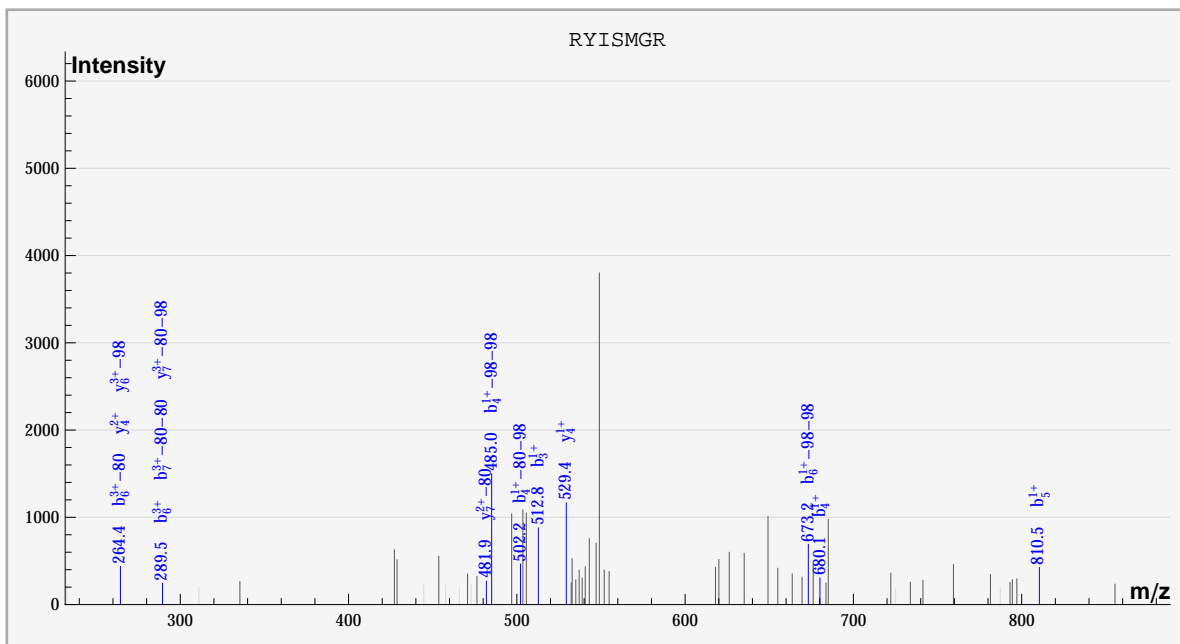

|   | # | b | b* | # | y | y* | P | P* |
|---|---|---|----|---|---|----|---|----|
| R | 1 |   |    |   |   |    |   | ✓  |
| Y | 2 |   |    | 6 |   | ✓  |   |    |
| I | 3 | ✓ |    | 5 |   |    |   |    |
| S | 4 | ✓ | ✓  | 4 | ✓ |    |   |    |
| M | 5 | ✓ |    | 3 |   |    |   |    |
| G | 6 | ✓ | ✓  | 2 |   |    |   |    |
| R | 7 |   | ✓  | 1 |   |    |   |    |

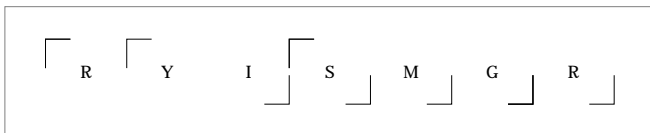

dbValid true SYLPGLRR PHOS(1) 2. 522. -0.734323 4.91717 100. ? 2352.  
 S\_Acido\_new%gi|68566861|gb|AAY79790.1| SYLPGLRR%:PHOS:.....:sample\_3%cmpd\_1028

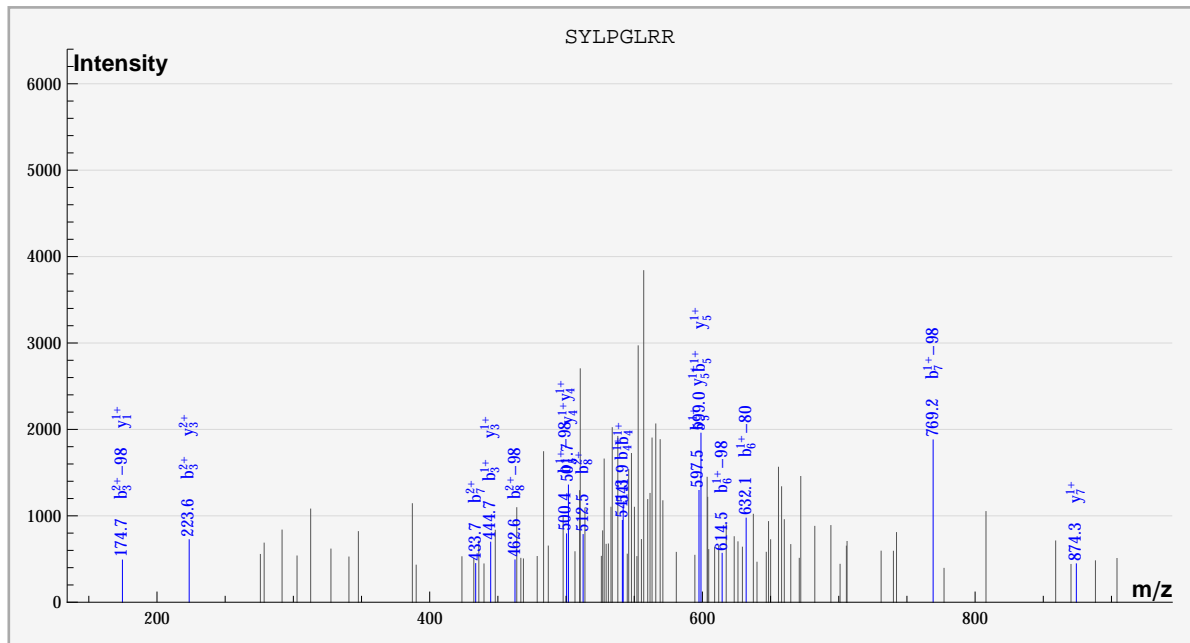

|   | # | b | b* | # | y | y* | P | P* |
|---|---|---|----|---|---|----|---|----|
| S | 1 |   |    |   |   |    |   |    |
| Y | 2 |   |    | 7 | ✓ |    |   |    |
| L | 3 | ✓ | ✓  | 6 |   |    |   |    |
| P | 4 | ✓ |    | 5 | ✓ |    |   |    |
| G | 5 | ✓ | ✓  | 4 | ✓ |    |   |    |
| L | 6 |   | ✓  | 3 | ✓ |    |   |    |
| R | 7 | ✓ | ✓  | 2 |   |    |   |    |
| R | 8 | ✓ | ✓  | 1 | ✓ |    |   |    |

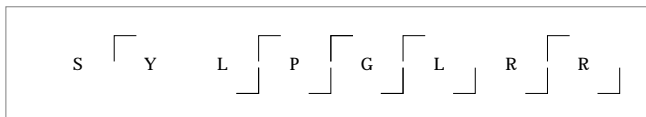

dbValid true RYCNST Cys\_CAM(1),PHOS(3) 2. 522. -1.37912 4.89472 100. ? 4206.  
 S\_Acido\_new%gil68567739|gb|AAy80668.1| RYCNST%::PHOS:Cys\_CAM::PHOS:PHOS:%sample\_3%compd\_2729

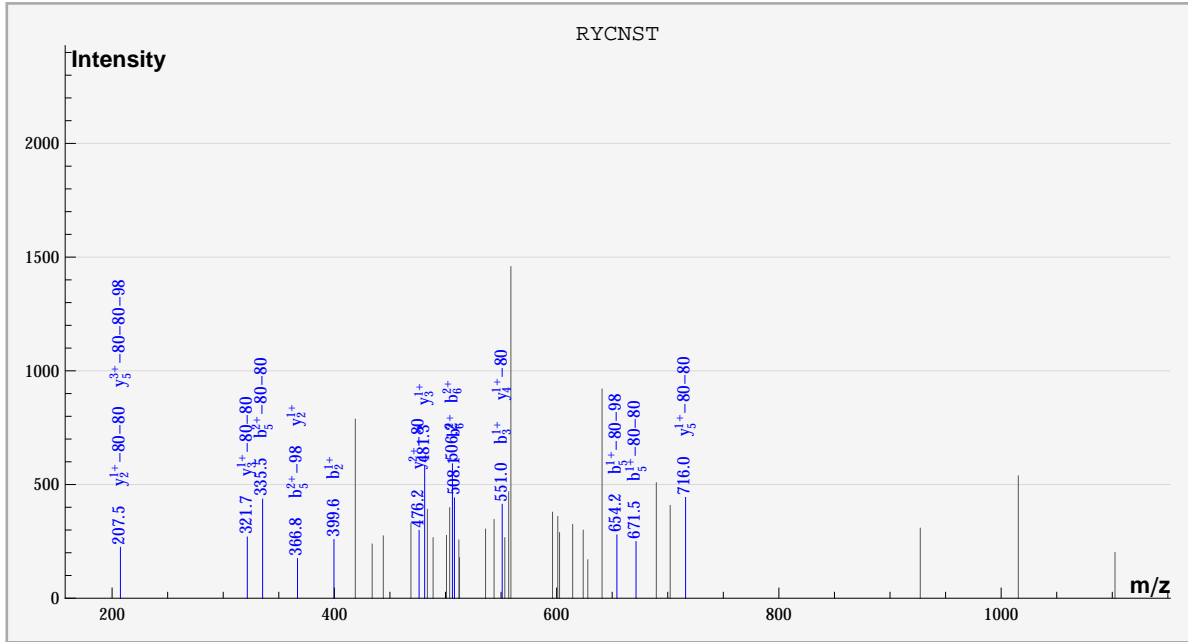

|   | # | b | b* | # | y | y* | P | P* |
|---|---|---|----|---|---|----|---|----|
| R | 1 |   |    |   |   |    |   | ✓  |
| Y | 2 | ✓ |    | 5 |   | ✓  |   |    |
| C | 3 | ✓ |    | 4 |   | ✓  |   |    |
| N | 4 |   |    | 3 | ✓ | ✓  |   |    |
| S | 5 |   | ✓  | 2 | ✓ | ✓  |   |    |
| T | 6 | ✓ |    | 1 |   |    |   |    |

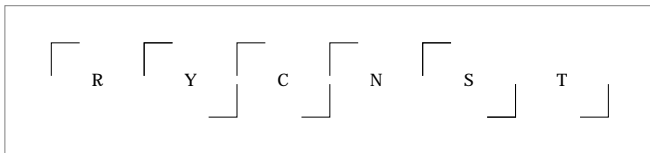

dbValid true SSSISVRAR PHOS(1) 2. 523. -1.24432 5.22536 100. ? 1572.

S\_Acido\_new%gi|68568115|gb|AAY81044.1| SSSISVRAR%:PHOS:.....%sample\_3%cmpd\_310

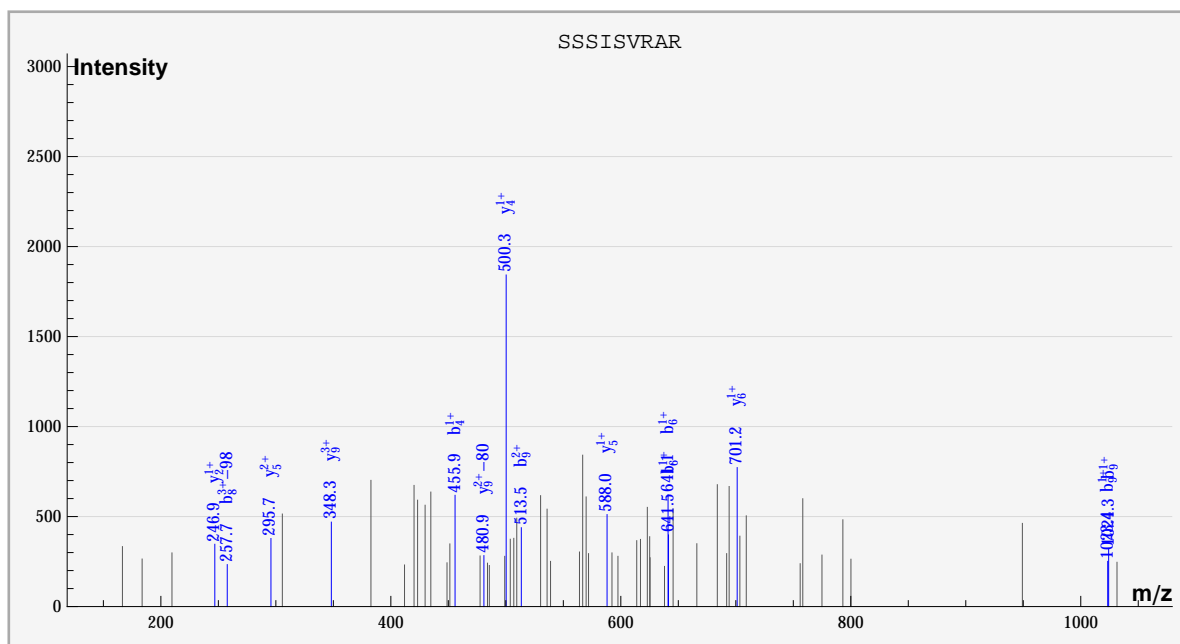

|   | # | b | b* | # | y | y* | P | P* |
|---|---|---|----|---|---|----|---|----|
| S | 1 |   |    |   |   |    | ✓ | ✓  |
| S | 2 |   |    | 8 |   |    |   |    |
| S | 3 |   |    | 7 |   |    |   |    |
| I | 4 | ✓ |    | 6 | ✓ |    |   |    |
| S | 5 |   |    | 5 | ✓ |    |   |    |
| V | 6 | ✓ |    | 4 | ✓ |    |   |    |
| R | 7 |   |    | 3 |   |    |   |    |
| A | 8 |   | ✓  | 2 | ✓ |    |   |    |
| R | 9 | ✓ |    | 1 |   |    |   |    |

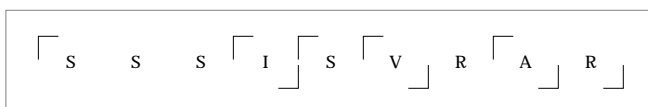



dbValid true DLNQSAVSK PHOS(1) 2. 523. -1.76576 4.95754 100. ? 1644.  
 S\_Acido\_new%gi|68567677|gb|AAY80606.1| DLNQSAVSK%.....PHOS::%sample\_3%compd\_377

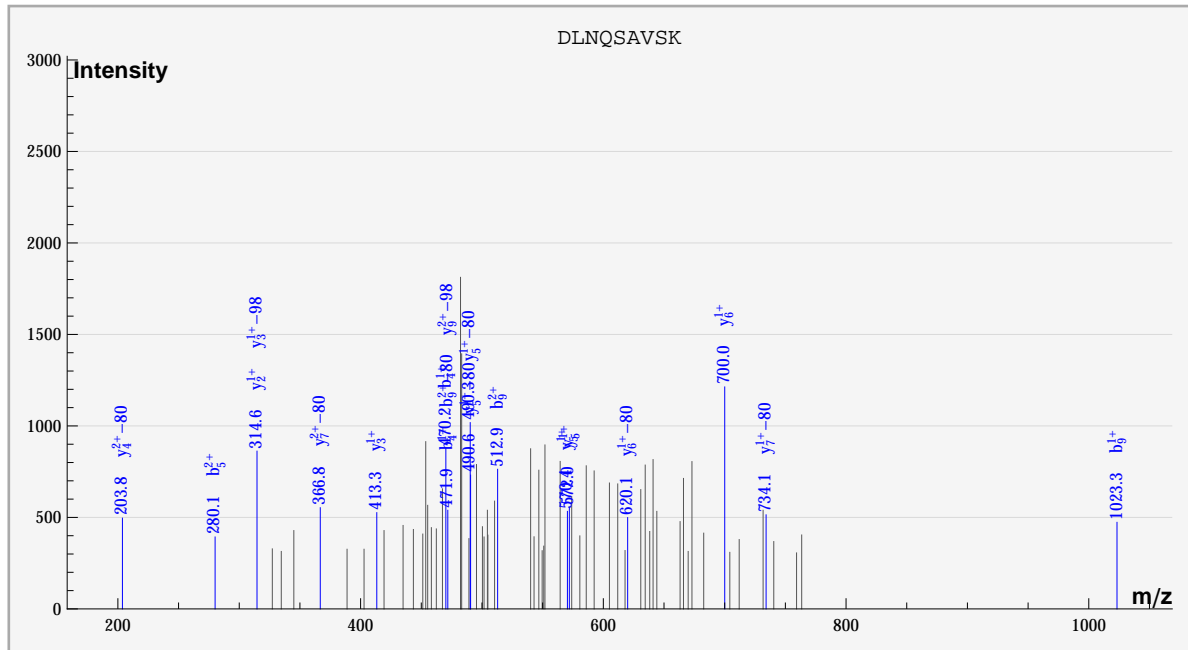

|   | # | b | b* | # | y | y* | P | P* |
|---|---|---|----|---|---|----|---|----|
| D | 1 |   |    |   |   |    |   | ✓  |
| L | 2 |   |    | 8 |   |    |   |    |
| N | 3 |   |    | 7 |   | ✓  |   |    |
| Q | 4 | ✓ |    | 6 | ✓ | ✓  |   |    |
| S | 5 | ✓ |    | 5 | ✓ | ✓  |   |    |
| A | 6 |   |    | 4 |   | ✓  |   |    |
| V | 7 |   |    | 3 | ✓ | ✓  |   |    |
| S | 8 |   |    | 2 | ✓ |    |   |    |
| K | 9 | ✓ | ✓  | 1 |   |    |   |    |

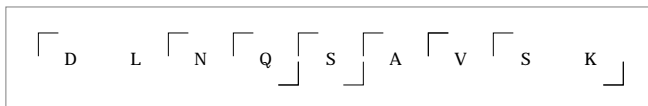

dbValid true YIESVINK PHOS(1) 2. 523. 0.251902 5.10112 100. ? 1848.  
 S\_Acido\_new%gi|68568382|gb|AAY81311.1| YIESVINK%:PHOS:.....:sample\_3%compd\_565

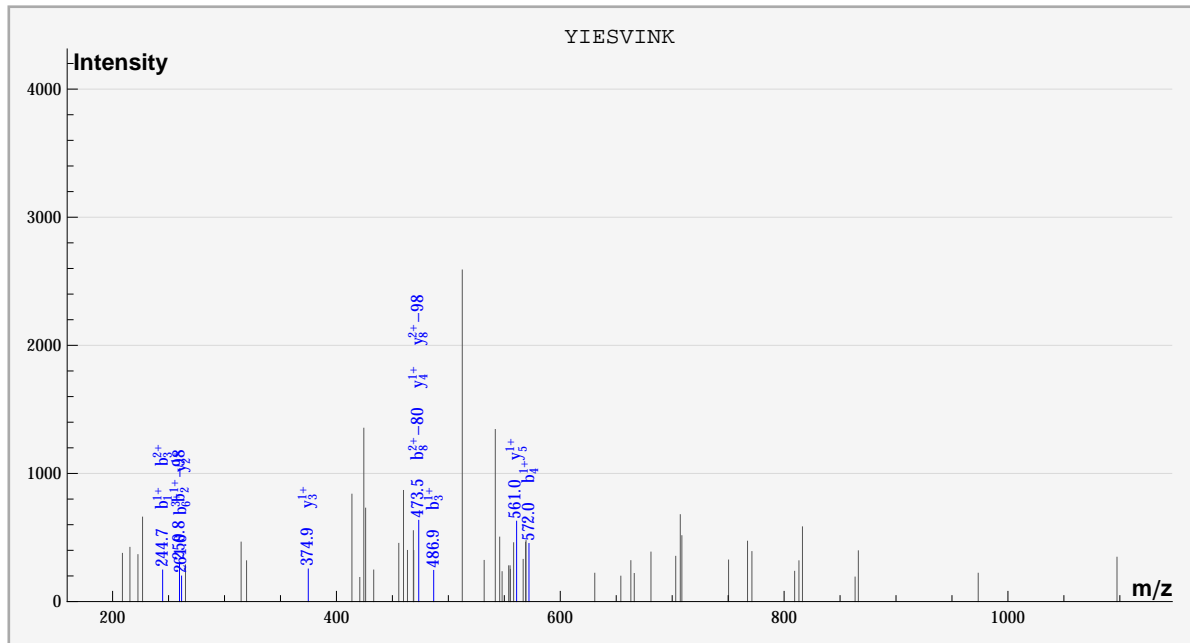

|   | # | b | b* | # | y | y* | P | P* |
|---|---|---|----|---|---|----|---|----|
| Y | 1 | ✓ |    |   |   |    |   | ✓  |
| I | 2 |   | ✓  | 7 |   |    |   |    |
| E | 3 | ✓ |    | 6 |   |    |   |    |
| S | 4 | ✓ |    | 5 | ✓ |    |   |    |
| V | 5 |   |    | 4 | ✓ |    |   |    |
| I | 6 | ✓ |    | 3 | ✓ |    |   |    |
| N | 7 |   |    | 2 | ✓ |    |   |    |
| K | 8 |   | ✓  | 1 |   |    |   |    |

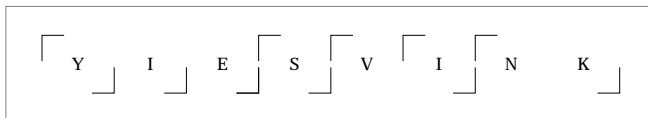

dbValid true GWELFASR PHOS(1) 2. 523. 0.228757 5.49982 100. ? 2400.

S\_Acido\_new%gi|68568364|gb|AAY81293.1| GWELFASR%:::::::PHOS::%sample\_3%cmpd\_1073

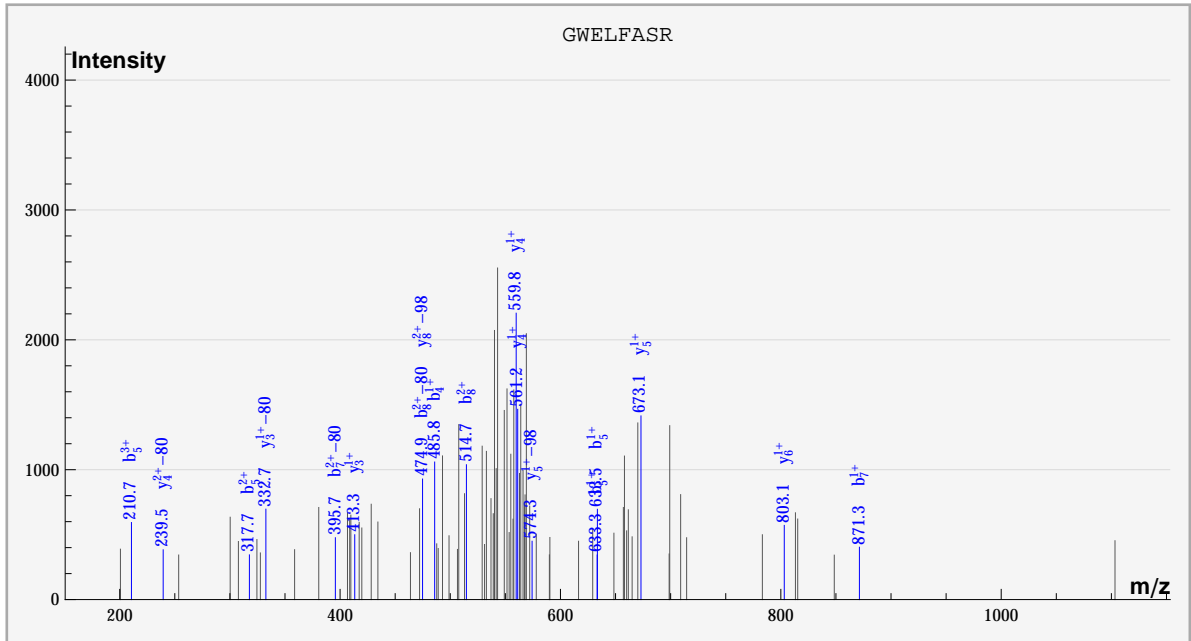

|   | # | b | b* | # | y | y* | P | P* |
|---|---|---|----|---|---|----|---|----|
| G | 1 |   |    |   |   |    |   | ✓  |
| W | 2 |   |    | 7 |   |    |   |    |
| E | 3 |   |    | 6 | ✓ |    |   |    |
| L | 4 | ✓ |    | 5 | ✓ | ✓  |   |    |
| F | 5 | ✓ |    | 4 | ✓ | ✓  |   |    |
| A | 6 |   |    | 3 | ✓ | ✓  |   |    |
| S | 7 | ✓ | ✓  | 2 |   |    |   |    |
| R | 8 | ✓ | ✓  | 1 |   |    |   |    |

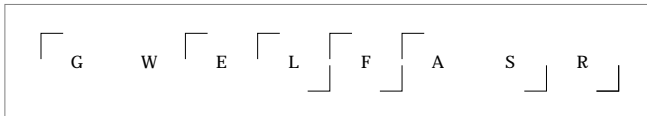

dbValid true YKLSYK PHOS(3) 2. 523. -1.82165 5.11057 100. ? 2844.  
 S\_Acido\_new%gi|68567349|gb|AAy80278.1| YKLSYK%:PHOS::PHOS:PHOS::%sample\_3%compd\_1448

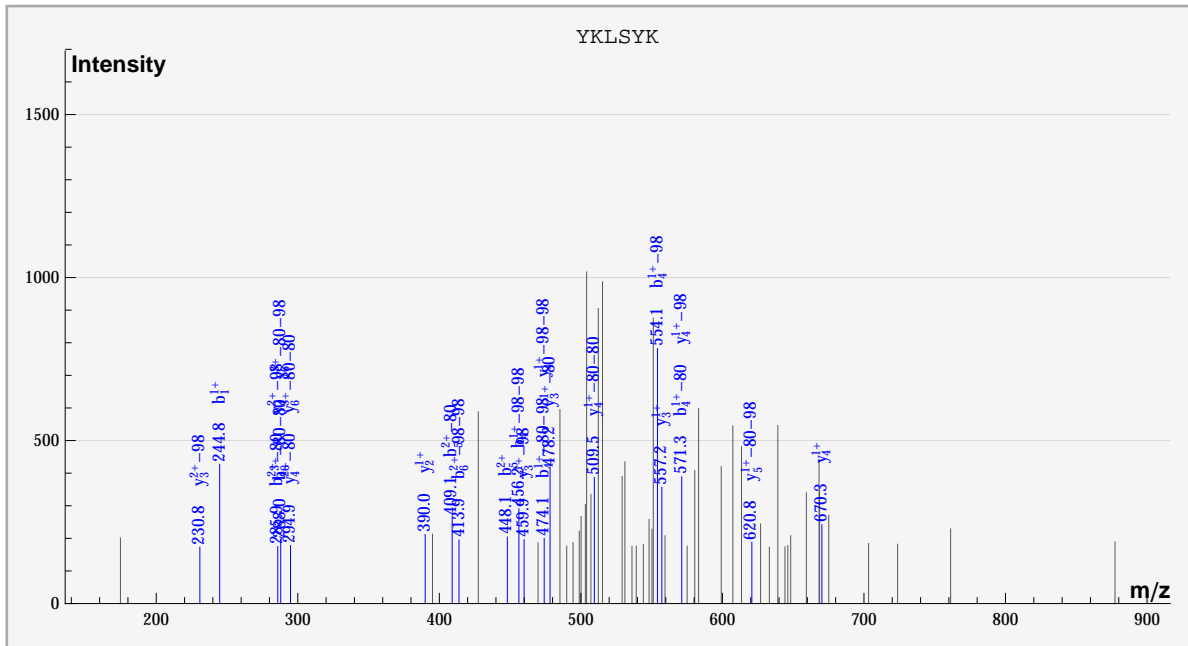

|   | # | b | b* | # | y | y* | P | P* |
|---|---|---|----|---|---|----|---|----|
| Y | 1 | ✓ |    |   |   |    |   | ✓  |
| K | 2 |   |    | 5 |   | ✓  |   |    |
| L | 3 |   |    | 4 | ✓ | ✓  |   |    |
| S | 4 | ✓ | ✓  | 3 | ✓ | ✓  |   |    |
| Y | 5 | ✓ | ✓  | 2 | ✓ |    |   |    |
| K | 6 | ✓ |    | 1 |   |    |   |    |

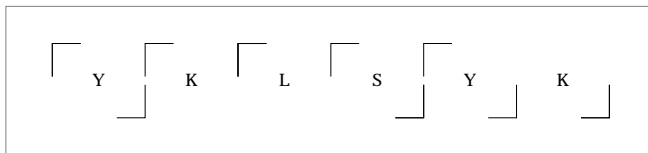

dbValid true YKLSYK PHOS(3) 2. 523. -1.82165 4.92498 100. ? 2856.

S\_Acido\_new%gi|68567349|gb|AAY80278.1| YKLSYK%:PHOS::PHOS::%sample\_3%compd\_1458

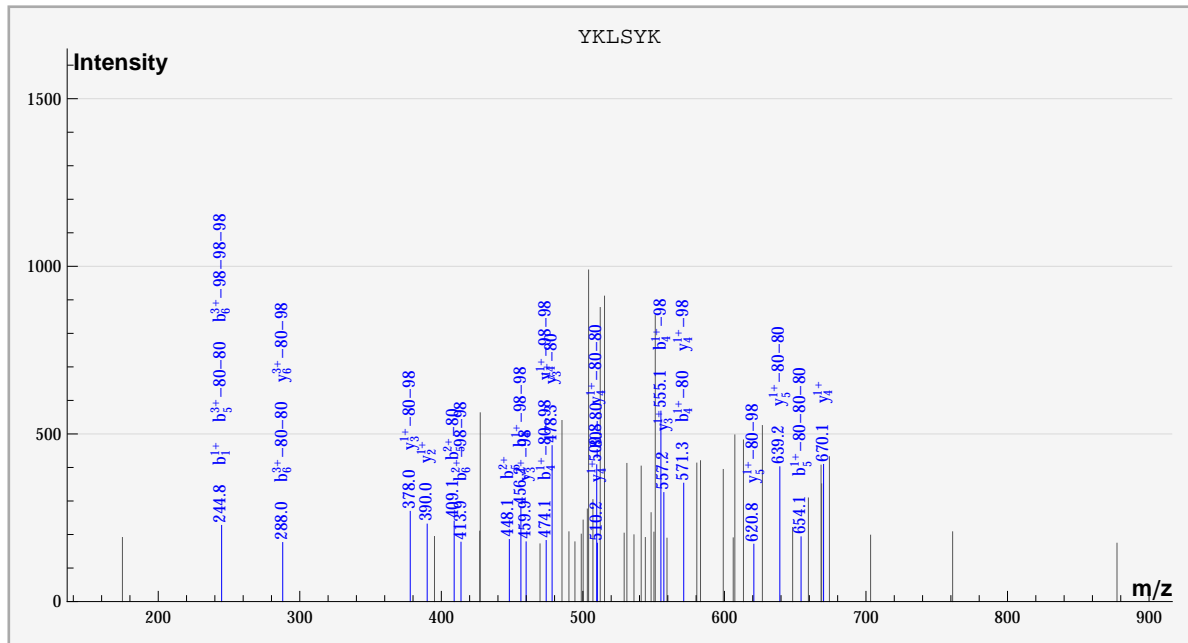

|   | # | b | b* | # | y | y* | P | P* |
|---|---|---|----|---|---|----|---|----|
| Y | 1 | ✓ |    |   |   |    |   | ✓  |
| K | 2 |   |    | 5 |   | ✓  |   |    |
| L | 3 |   |    | 4 | ✓ | ✓  |   |    |
| S | 4 | ✓ | ✓  | 3 | ✓ | ✓  |   |    |
| Y | 5 | ✓ | ✓  | 2 | ✓ |    |   |    |
| K | 6 | ✓ |    | 1 |   |    |   |    |

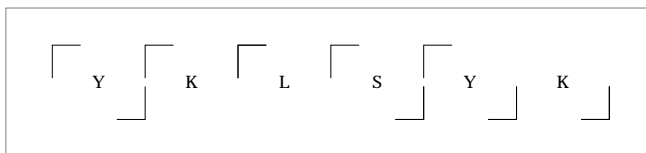

dbValid true KIIYSLTDK PHOS(1) 2. 523. 1.25973 5.02136 100. ? 3006.  
 S\_Acido\_new%gi|68568704|gb|AA81633.1| KIIYSLTDK%:::PHOS%:::%sample\_3%compd\_1627

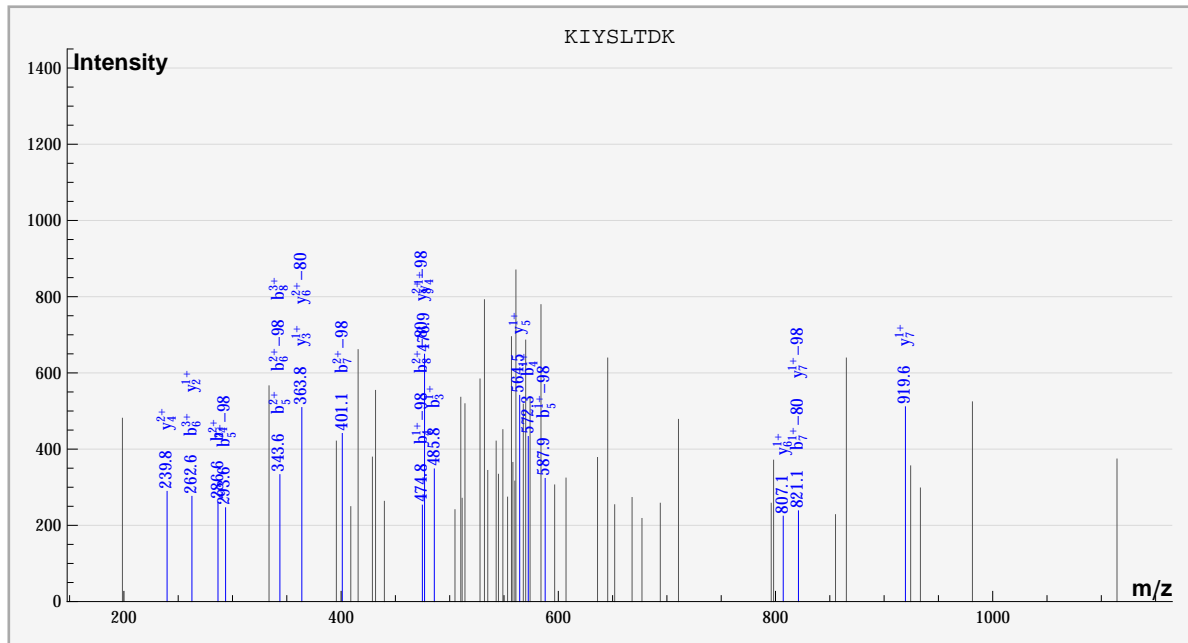

|   | # | b | b* | # | y | y* | P | P* |
|---|---|---|----|---|---|----|---|----|
| K | 1 |   |    |   |   |    |   | ✓  |
| I | 2 |   |    | 7 | ✓ | ✓  |   |    |
| Y | 3 | ✓ |    | 6 | ✓ | ✓  |   |    |
| S | 4 | ✓ | ✓  | 5 | ✓ |    |   |    |
| L | 5 | ✓ | ✓  | 4 | ✓ |    |   |    |
| T | 6 | ✓ | ✓  | 3 | ✓ |    |   |    |
| D | 7 |   | ✓  | 2 | ✓ |    |   |    |
| K | 8 | ✓ | ✓  | 1 |   |    |   |    |

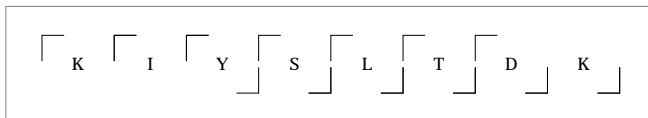

dbValid true YTVNLFK PHOS(2) 2. 523. -0.286243 4.96753 100. ? 5022.

S\_Acido\_new%gi|68567930|gb|AAV80859.1| YTVNLFK%:PHOS:PHOS:::sample\_3%compd\_3475

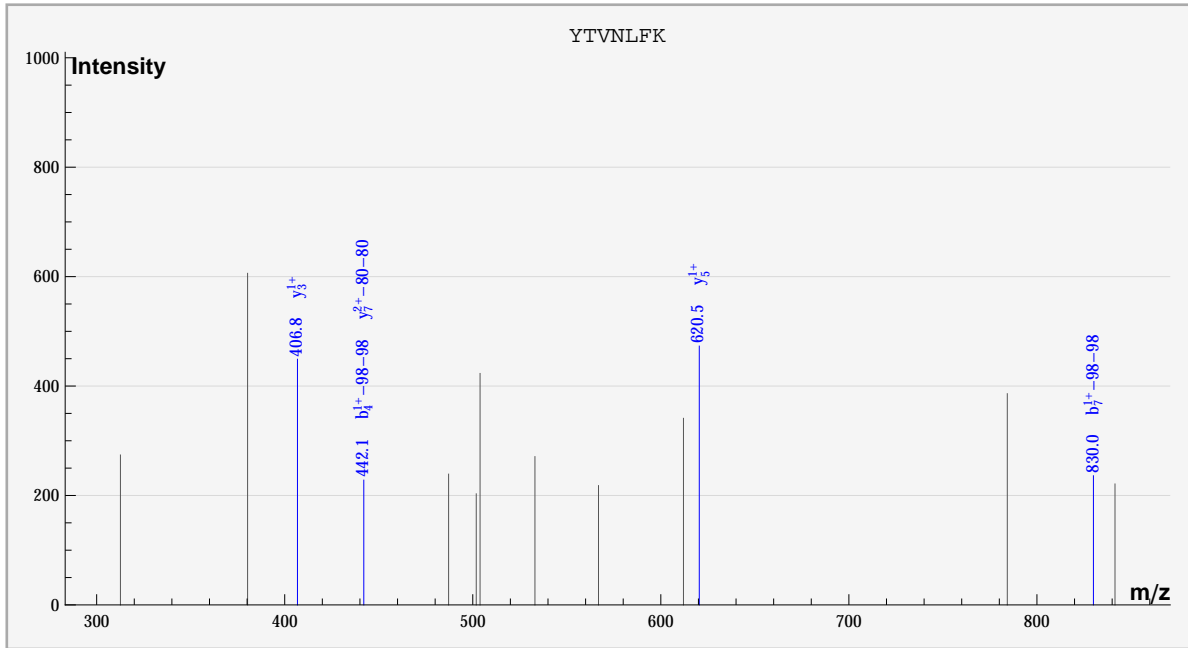

|   | # | b | b* | # | y | y* | P | P* |
|---|---|---|----|---|---|----|---|----|
| Y | 1 |   |    |   |   |    |   | ✓  |
| T | 2 |   |    | 6 |   |    |   |    |
| V | 3 |   |    | 5 | ✓ |    |   |    |
| N | 4 | ✓ |    | 4 |   |    |   |    |
| L | 5 |   |    | 3 | ✓ |    |   |    |
| F | 6 |   |    | 2 |   |    |   |    |
| K | 7 | ✓ |    | 1 |   |    |   |    |

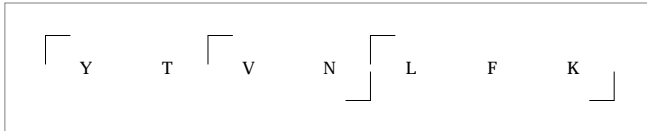

dbValid true YSKGMVQR PHOS(1) 2. 524. 0.735902 5.39194 100. ? 1644.  
 S\_Acido\_new%gi|68568662|gb|AAY81591.1| YSKGMVQR%::PHOS:::sample\_3%compd\_378

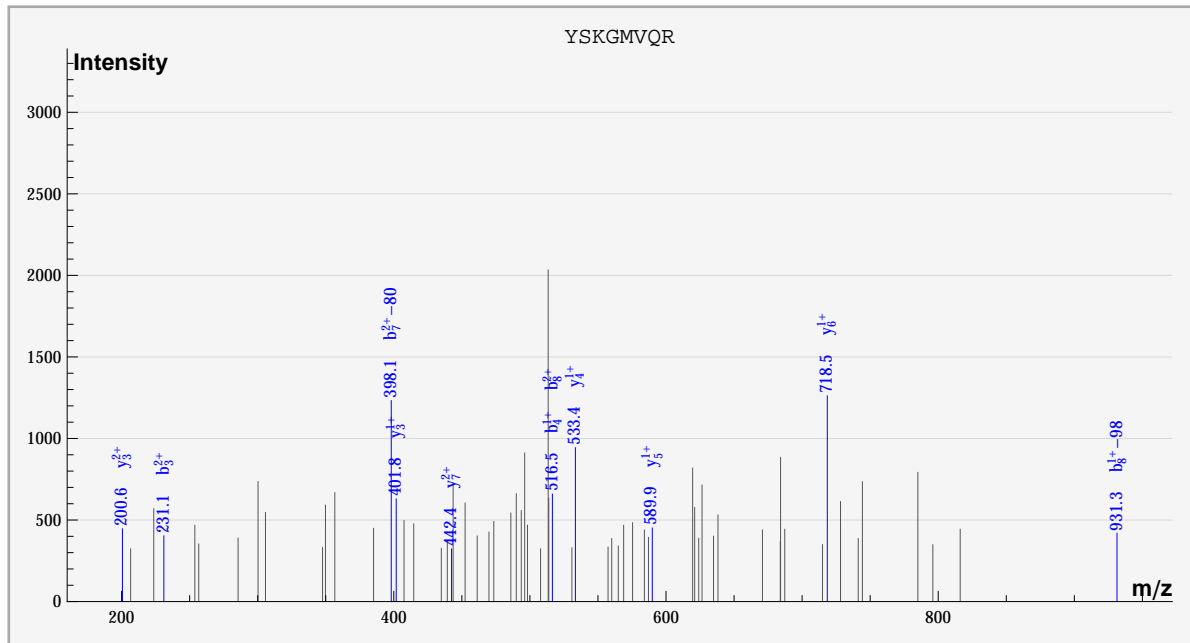

|   | # | b | b* | # | y | y* | P | P* |
|---|---|---|----|---|---|----|---|----|
| Y | 1 |   |    |   |   |    |   |    |
| S | 2 |   |    | 7 | ✓ |    |   |    |
| K | 3 | ✓ |    | 6 | ✓ |    |   |    |
| G | 4 | ✓ |    | 5 | ✓ |    |   |    |
| M | 5 |   |    | 4 | ✓ |    |   |    |
| V | 6 |   |    | 3 | ✓ |    |   |    |
| Q | 7 |   | ✓  | 2 |   |    |   |    |
| R | 8 | ✓ | ✓  | 1 |   |    |   |    |

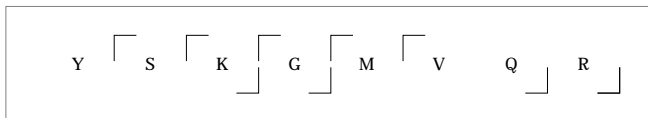



dbValid true VYEADVDR PHOS(1) 2. 524. -0.286863 4.93102 100. ? 1950.  
 S\_Acido\_new%gi|68566860|gb|AAY79789.1| VYEADVDR%::PHOS:::sample\_0%cmpd\_641

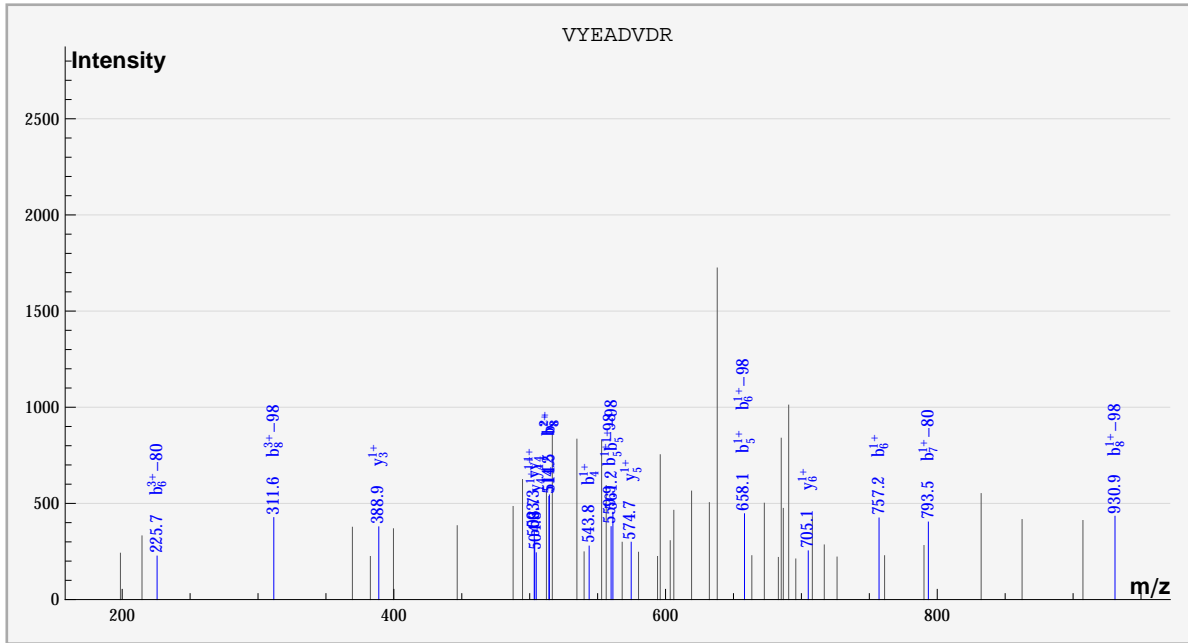

|   | # | b | b* | # | y | y* | P | P* |
|---|---|---|----|---|---|----|---|----|
| V | 1 |   |    |   |   |    |   |    |
| Y | 2 |   |    | 7 |   |    |   |    |
| E | 3 |   |    | 6 |   | ✓  |   |    |
| A | 4 | ✓ |    | 5 |   | ✓  |   |    |
| D | 5 | ✓ | ✓  | 4 |   | ✓  |   |    |
| V | 6 | ✓ | ✓  | 3 |   | ✓  |   |    |
| D | 7 |   | ✓  | 2 |   |    |   |    |
| R | 8 | ✓ | ✓  | 1 |   |    |   |    |

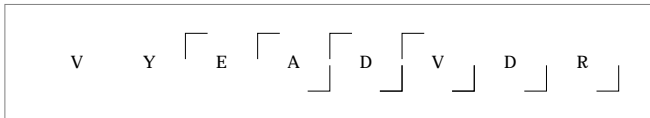

dbValid true VMYAMSR Oxidation\_M(2),PHOS(2) 2. 524. 1.16525 5.25156 100. ? 2082.

S\_Acido\_new%gil68568538|gb|AAY81467.1| VMYAMSR%::Oxidation\_M:PHOS::Oxidation\_M:PHOS::%sample\_0%cmpd\_755

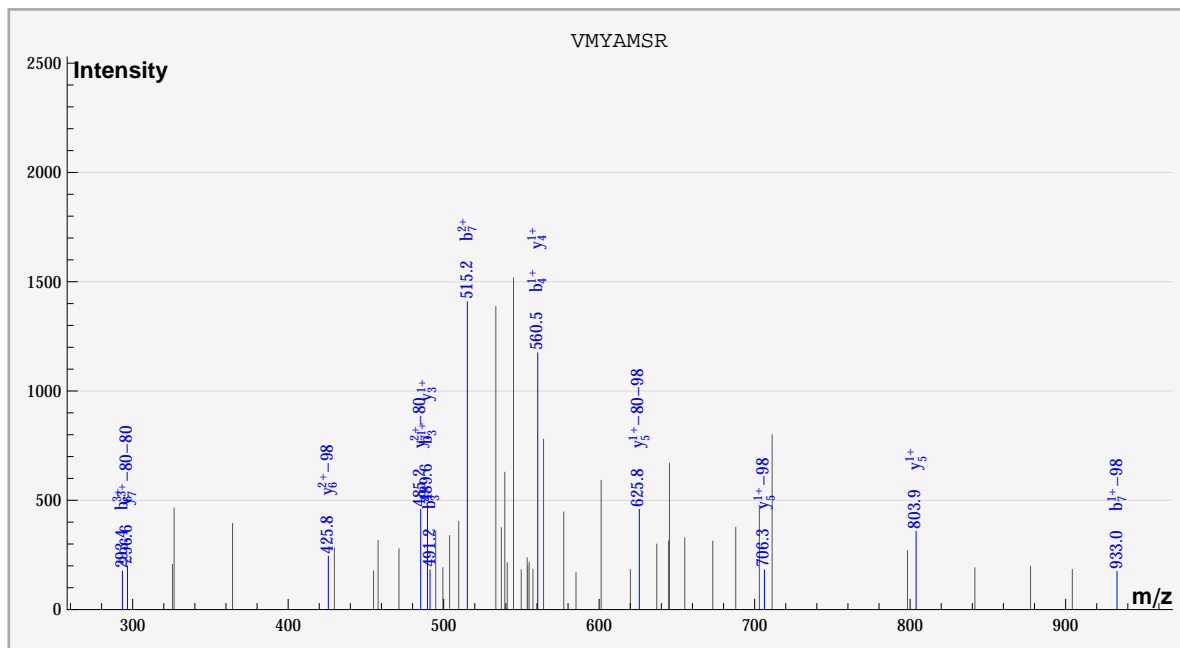

|   | # | b | b* | # | y | y* | P | P* |
|---|---|---|----|---|---|----|---|----|
| V | 1 |   |    |   |   |    |   | ✓  |
| M | 2 |   |    | 6 |   | ✓  |   |    |
| Y | 3 | ✓ |    | 5 | ✓ | ✓  |   |    |
| A | 4 | ✓ |    | 4 | ✓ |    |   |    |
| M | 5 |   |    | 3 | ✓ |    |   |    |
| S | 6 | ✓ |    | 2 |   |    |   |    |
| R | 7 | ✓ | ✓  | 1 |   |    |   |    |

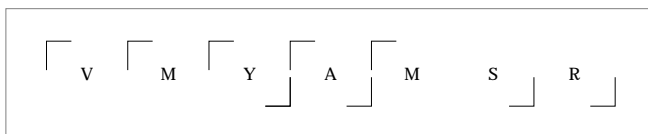

dbValid true YTFQPIIKEIR PHOS(2) 3. 524. -0.751129 4.91907 100. ? 2808.  
 S\_Acido\_new%gil68568642|gb|AAY81571.1| YTFQPIIKEIR%:PHOS:PHOS:.....%sample\_3%compd\_1452

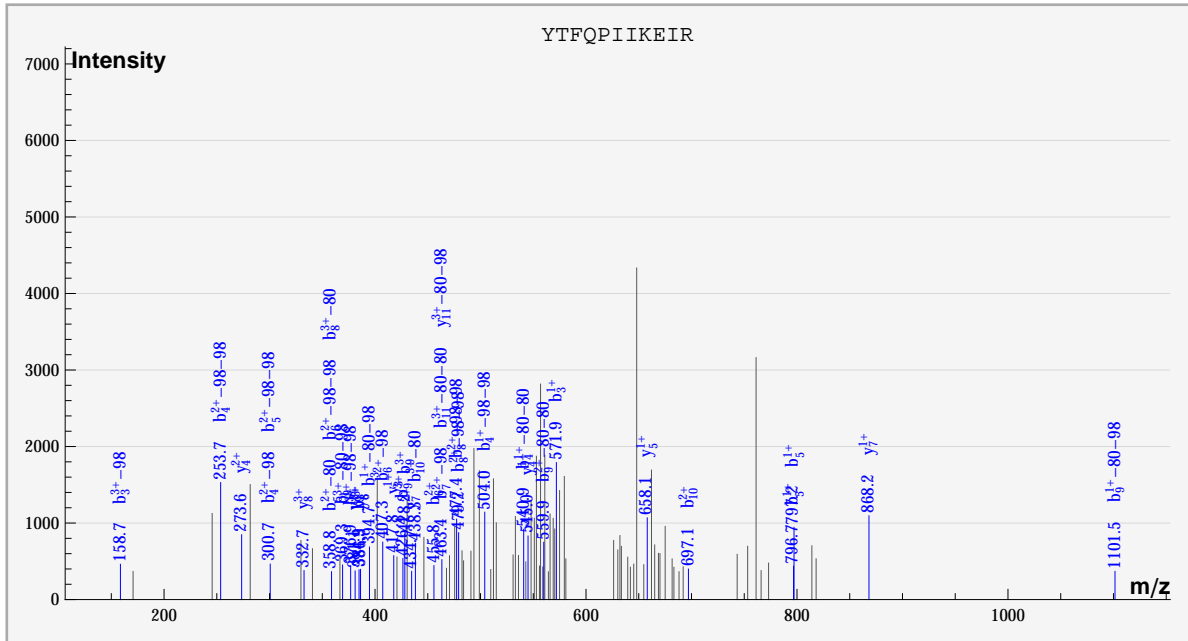

|   | #  | b | b* | #  | y | y* | P | P* |
|---|----|---|----|----|---|----|---|----|
| Y | 1  |   |    |    |   |    |   | ✓  |
| T | 2  |   |    | 10 |   |    |   |    |
| F | 3  | ✓ | ✓  | 9  | ✓ |    |   |    |
| Q | 4  | ✓ | ✓  | 8  | ✓ |    |   |    |
| P | 5  | ✓ | ✓  | 7  | ✓ |    |   |    |
| I | 6  | ✓ | ✓  | 6  | ✓ |    |   |    |
| I | 7  | ✓ | ✓  | 5  | ✓ |    |   |    |
| K | 8  | ✓ | ✓  | 4  | ✓ |    |   |    |
| E | 9  | ✓ | ✓  | 3  | ✓ |    |   |    |
| I | 10 | ✓ | ✓  | 2  |   |    |   |    |
| R | 11 | ✓ |    | 1  |   |    |   |    |

Y T F Q P I I K E I R

dbValid true ILKSSTR PHOS(3) 2. 524. -1.30002 5.40961 100. ? 4578.

S\_Acido\_new%gi|68567882|gb|AAy80811.1| ILKSSTR%:::PHOS:PHOS:PHOS::%sample\_3%compd\_3073

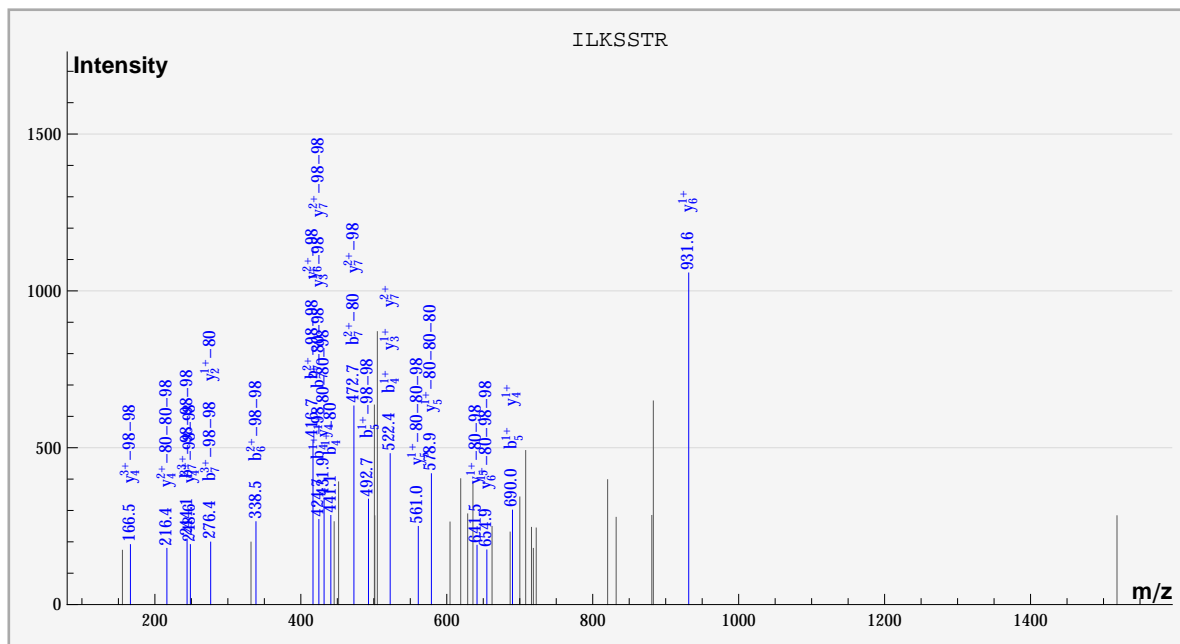

|   | # | b | b* | # | y | y* | P | P* |
|---|---|---|----|---|---|----|---|----|
| I | 1 |   |    |   |   |    | ✓ | ✓  |
| L | 2 |   |    | 6 | ✓ | ✓  |   |    |
| K | 3 |   |    | 5 |   | ✓  |   |    |
| S | 4 | ✓ | ✓  | 4 | ✓ | ✓  |   |    |
| S | 5 | ✓ | ✓  | 3 | ✓ | ✓  |   |    |
| T | 6 |   | ✓  | 2 |   | ✓  |   |    |
| R | 7 |   | ✓  | 1 |   |    |   |    |

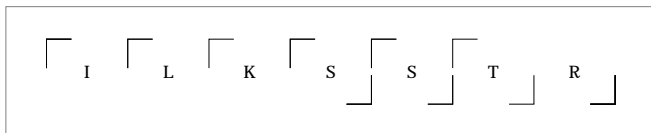

dbValid true YVELAYK PHOS(2) 2. 525. -1.79424 5.50015 100. ? 1272.  
 S\_Acido\_new%gi|68566786|gb|AA79715.1| YVELAYK%:PHOS:::PHOS::%sample\_3%cmpd\_52

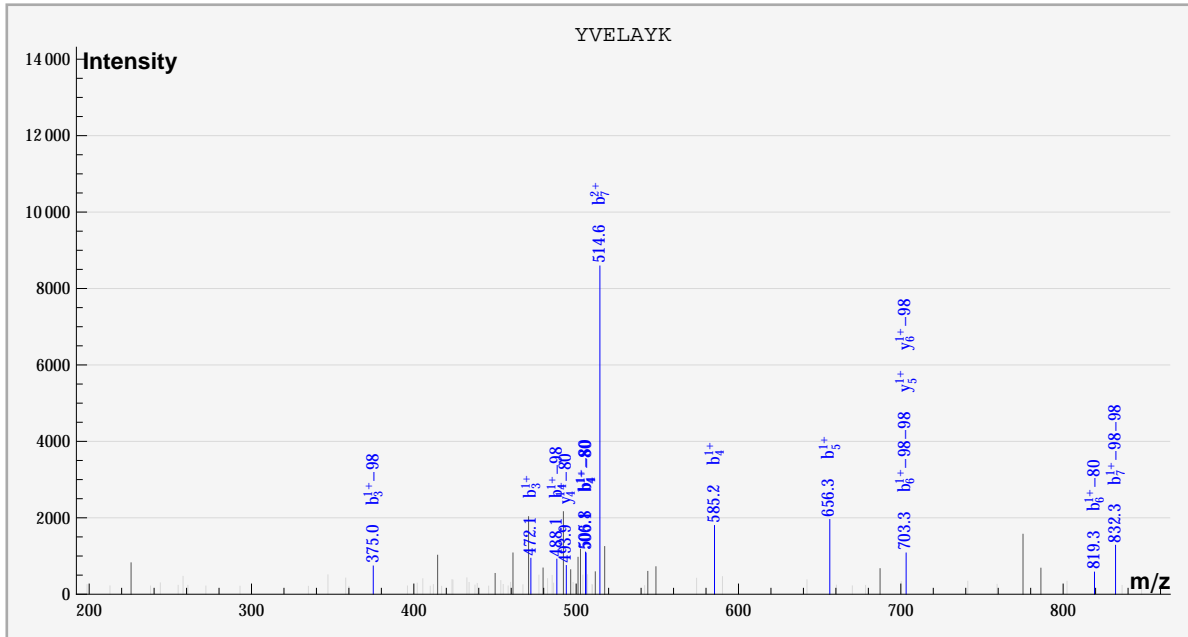

|   | # | b | b* | # | y | y* | P | P* |
|---|---|---|----|---|---|----|---|----|
| Y | 1 |   |    |   |   |    |   |    |
| V | 2 |   |    | 6 |   | ✓  |   |    |
| E | 3 | ✓ | ✓  | 5 | ✓ |    |   |    |
| L | 4 | ✓ | ✓  | 4 |   | ✓  |   |    |
| A | 5 | ✓ |    | 3 |   |    |   |    |
| Y | 6 |   | ✓  | 2 |   |    |   |    |
| K | 7 | ✓ | ✓  | 1 |   |    |   |    |

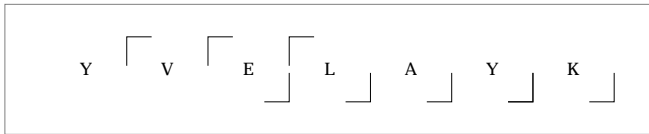

dbValid true SEIVSSLR PHOS(2) 2. 525. 0.717027 4.99196 100. ? 1854.  
 S\_Acido\_new%gi68568085|gb|AAy81014.1| SEIVSSLR%:PHOS:::PHOS:::%sample\_0%cmpd\_558

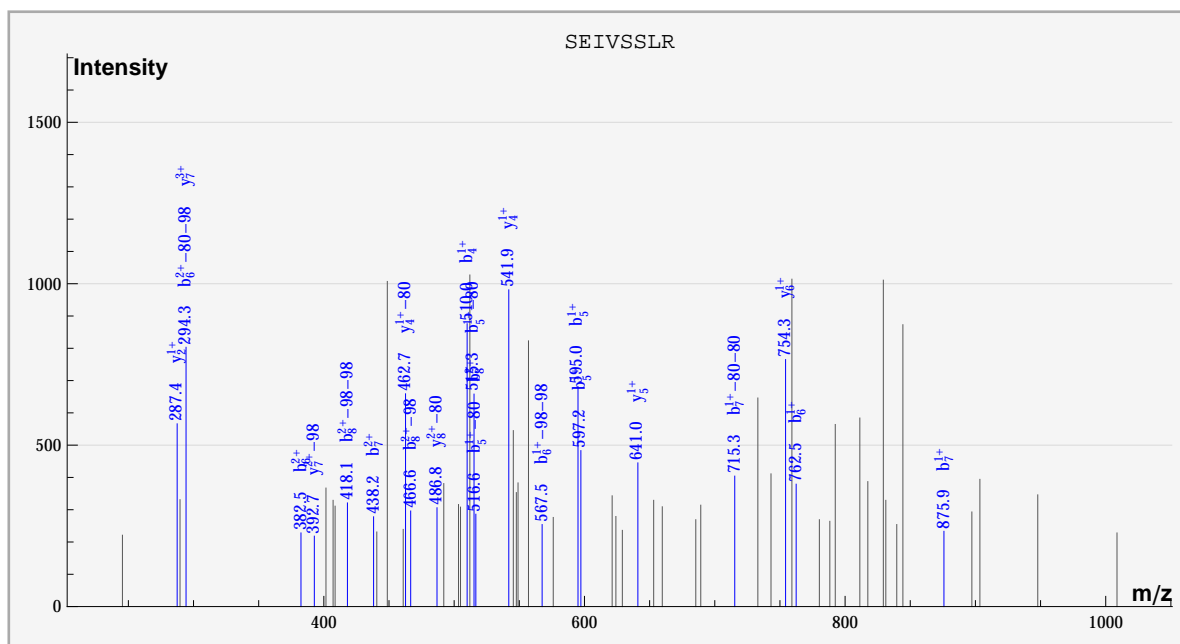

|   | # | b | b* | # | y | y* | P | P* |
|---|---|---|----|---|---|----|---|----|
| S | 1 |   |    |   |   |    |   | ✓  |
| E | 2 |   |    | 7 | ✓ | ✓  |   |    |
| I | 3 |   |    | 6 | ✓ |    |   |    |
| V | 4 | ✓ |    | 5 | ✓ |    |   |    |
| S | 5 | ✓ | ✓  | 4 | ✓ | ✓  |   |    |
| S | 6 | ✓ | ✓  | 3 |   |    |   |    |
| L | 7 | ✓ | ✓  | 2 | ✓ |    |   |    |
| R | 8 | ✓ | ✓  | 1 |   |    |   |    |

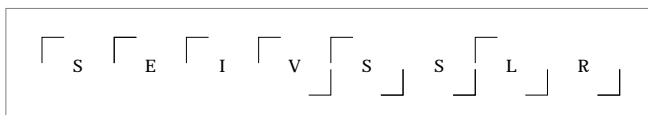

dbValid true RYVGALYK PHOS(1) 2. 525. 0.262602 4.90153 100. ? 2028.

S\_Acido\_new%gi|68566647|gb|AAY79576.1| RYVGALYK%:::::::PHOS::%sample\_3%cmpd\_732

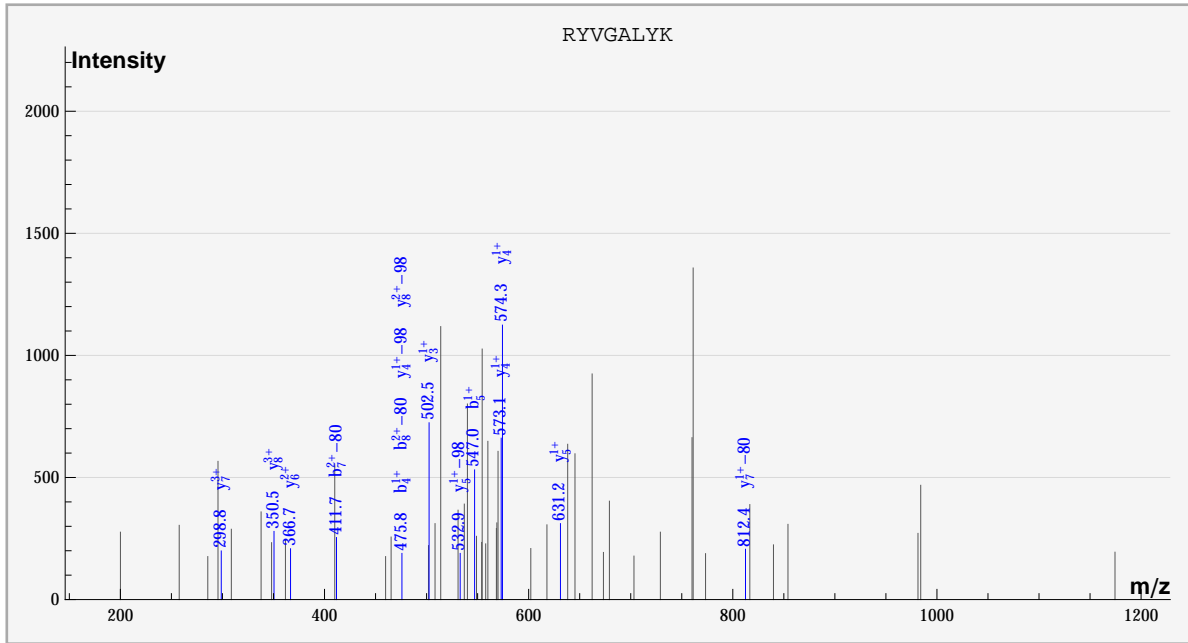

|   | # | b | b* | # | y | y* | P | P* |
|---|---|---|----|---|---|----|---|----|
| R | 1 |   |    |   |   |    | ✓ | ✓  |
| Y | 2 |   |    | 7 | ✓ | ✓  |   |    |
| V | 3 |   |    | 6 | ✓ |    |   |    |
| G | 4 | ✓ |    | 5 | ✓ | ✓  |   |    |
| A | 5 | ✓ |    | 4 | ✓ | ✓  |   |    |
| L | 6 |   |    | 3 | ✓ |    |   |    |
| Y | 7 |   | ✓  | 2 |   |    |   |    |
| K | 8 |   | ✓  | 1 |   |    |   |    |

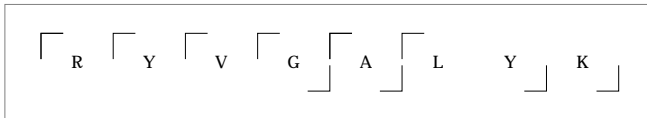

dbValid true RYVGALYK PHOS(1) 2. 525. 0.262602 5.49208 100. ? 2220.  
 S\_Acido\_new%gi|68566647|gb|AAY79576.1| RYVGALYK%::PHOS::::::%sample\_2%cmpd\_839

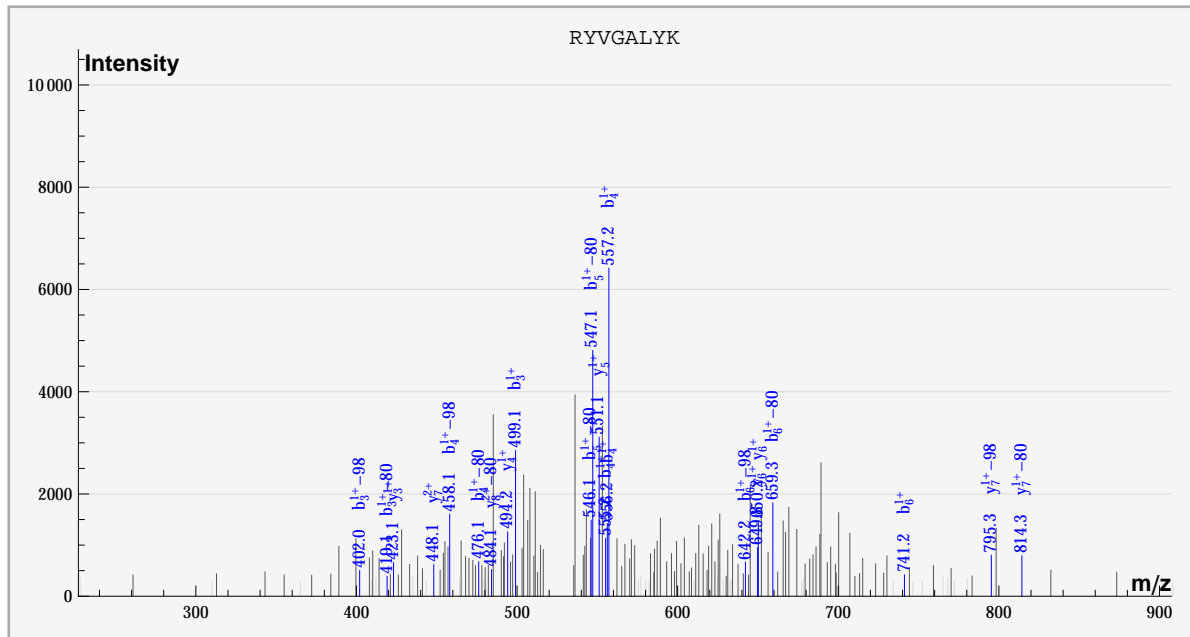

|   | # | b | b* | # | y | y* | P | P* |
|---|---|---|----|---|---|----|---|----|
| R | 1 |   |    |   |   |    |   | ✓  |
| Y | 2 |   |    | 7 | ✓ | ✓  |   |    |
| V | 3 | ✓ | ✓  | 6 | ✓ |    |   |    |
| G | 4 | ✓ | ✓  | 5 | ✓ |    |   |    |
| A | 5 |   | ✓  | 4 | ✓ |    |   |    |
| L | 6 | ✓ | ✓  | 3 | ✓ |    |   |    |
| Y | 7 |   |    | 2 |   |    |   |    |
| K | 8 |   |    | 1 |   |    |   |    |

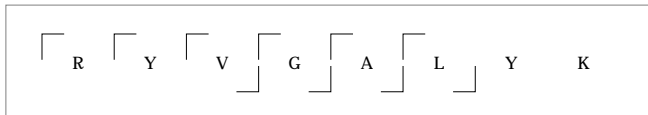



dbValid true YSDGRLVIPGATIK PHOS(1) 3. 525. -1.06062 5.01873 100. ? 2316.  
 S\_Acido\_new%gi|68568415|gb|AAY81344.1| YSDGRLVIPGATIK%::PHOS:::sample\_2%cmpd\_919

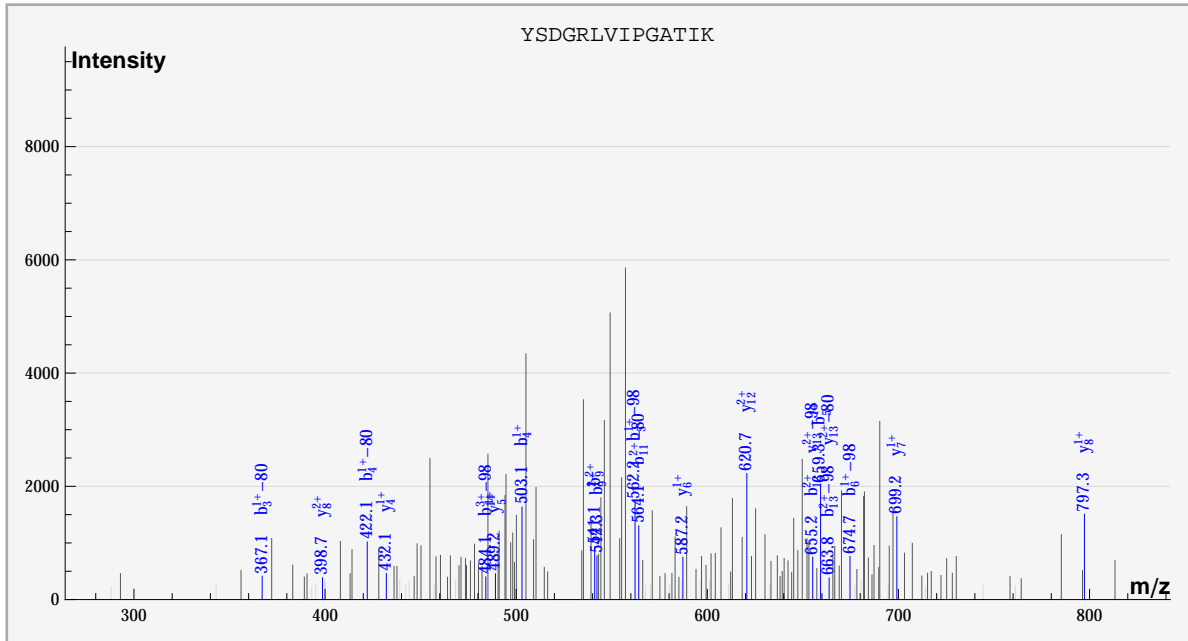

|   | #  | b | b* | #  | y | y* | P | P* |
|---|----|---|----|----|---|----|---|----|
| Y | 1  |   |    |    |   |    |   |    |
| S | 2  |   |    | 13 |   | ✓  |   |    |
| D | 3  | ✓ | ✓  | 12 | ✓ |    |   |    |
| G | 4  | ✓ | ✓  | 11 |   |    |   |    |
| R | 5  | ✓ | ✓  | 10 |   |    |   |    |
| L | 6  |   | ✓  | 9  |   |    |   |    |
| V | 7  |   |    | 8  | ✓ |    |   |    |
| I | 8  |   |    | 7  | ✓ |    |   |    |
| P | 9  | ✓ |    | 6  | ✓ |    |   |    |
| G | 10 |   |    | 5  | ✓ |    |   |    |
| A | 11 |   | ✓  | 4  | ✓ |    |   |    |
| T | 12 | ✓ |    | 3  |   |    |   |    |
| I | 13 |   | ✓  | 2  |   |    |   |    |
| K | 14 |   | ✓  | 1  |   |    |   |    |

Y [ S [ D ] G ] R ] L ] V [ I [ P ] G [ A ] T ] I ] K ]

dbValid true YIESVINK PHOS(1) 2. 525. -1.7481 5.35872 100. ? 2736.  
 S\_Acido\_new%gi|68568382|gb|AAY81311.1| YIESVINK%:PHOS:.....:sample\_2%compd\_1275

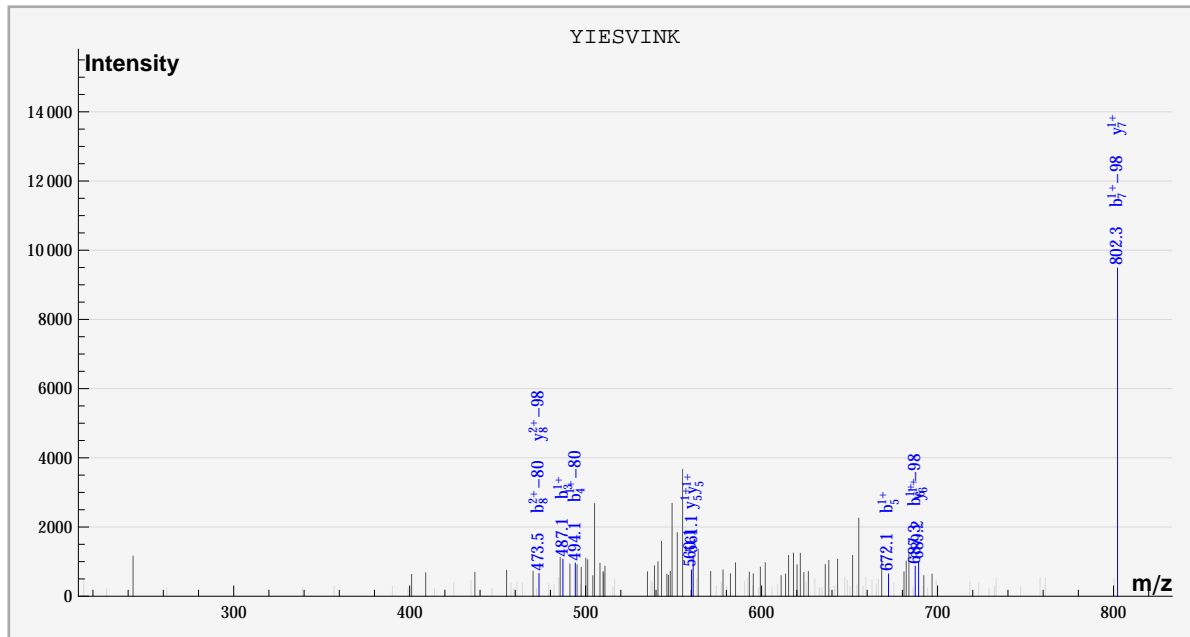

|   | # | b | b* | # | y | y* | P | P* |
|---|---|---|----|---|---|----|---|----|
| Y | 1 |   |    |   |   |    |   | ✓  |
| I | 2 |   |    | 7 | ✓ |    |   |    |
| E | 3 | ✓ |    | 6 | ✓ |    |   |    |
| S | 4 |   | ✓  | 5 | ✓ |    |   |    |
| V | 5 | ✓ |    | 4 |   |    |   |    |
| I | 6 |   | ✓  | 3 |   |    |   |    |
| N | 7 |   | ✓  | 2 |   |    |   |    |
| K | 8 |   | ✓  | 1 |   |    |   |    |

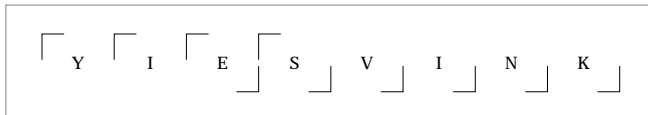

dbValid true YIESVINK PHOS(1) 2. 525. -1.7481 6.27159 100. ? 2748.  
 S\_Acido\_new%gi|68568382|gb|AAY81311.1| YIESVINK%:PHOS:.....:sample\_2%compd\_1285

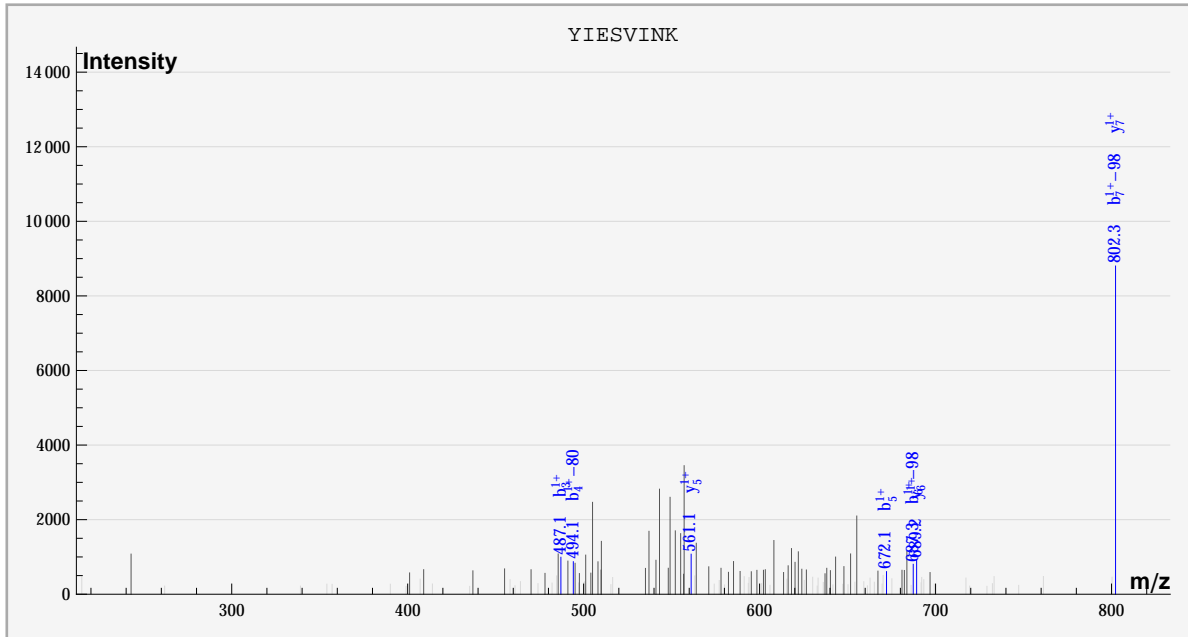

|   | # | b | b* | # | y | y* | P | P* |
|---|---|---|----|---|---|----|---|----|
| Y | 1 |   |    |   |   |    |   |    |
| I | 2 |   |    | 7 | ✓ |    |   |    |
| E | 3 | ✓ |    | 6 | ✓ |    |   |    |
| S | 4 |   | ✓  | 5 | ✓ |    |   |    |
| V | 5 | ✓ |    | 4 |   |    |   |    |
| I | 6 |   | ✓  | 3 |   |    |   |    |
| N | 7 |   | ✓  | 2 |   |    |   |    |
| K | 8 |   |    | 1 |   |    |   |    |

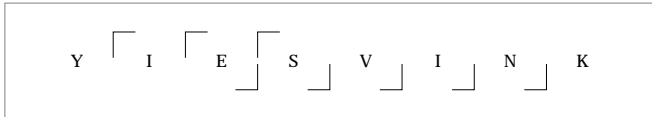

dbValid true YIESVINK PHOS(1) 2. 525. -1.7481 5.24023 100. ? 2760.  
 S\_Acido\_new%gi|68568382|gb|AAY81311.1| YIESVINK%:PHOS:::sample\_2%compd\_1295

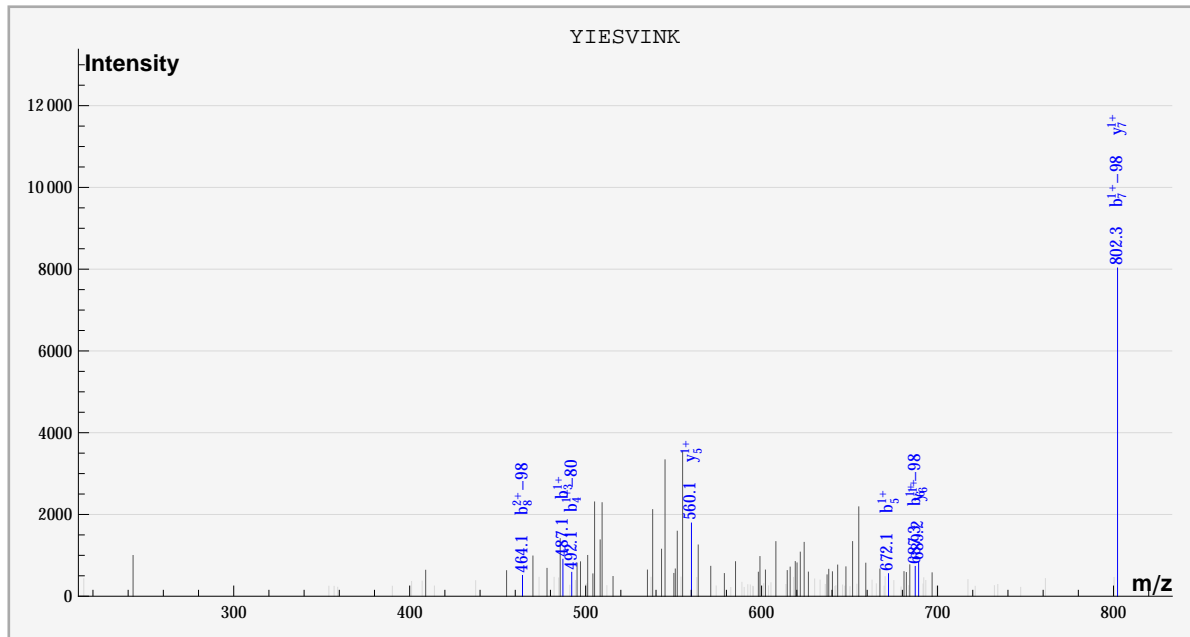

|   | # | b | b* | # | y | y* | P | P* |
|---|---|---|----|---|---|----|---|----|
| Y | 1 |   |    |   |   |    |   |    |
| I | 2 |   |    | 7 | ✓ |    |   |    |
| E | 3 | ✓ |    | 6 | ✓ |    |   |    |
| S | 4 |   | ✓  | 5 | ✓ |    |   |    |
| V | 5 | ✓ |    | 4 |   |    |   |    |
| I | 6 |   | ✓  | 3 |   |    |   |    |
| N | 7 |   | ✓  | 2 |   |    |   |    |
| K | 8 |   | ✓  | 1 |   |    |   |    |

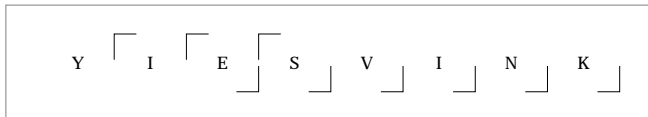

dbValid true YIESVINK PHOS(1) 2. 525. -1.7481 4.96612 100. ? 2772.  
 S\_Acido\_new%gi|68568382|gb|AAY81311.1| YIESVINK%:PHOS:::sample\_2%compd\_1305

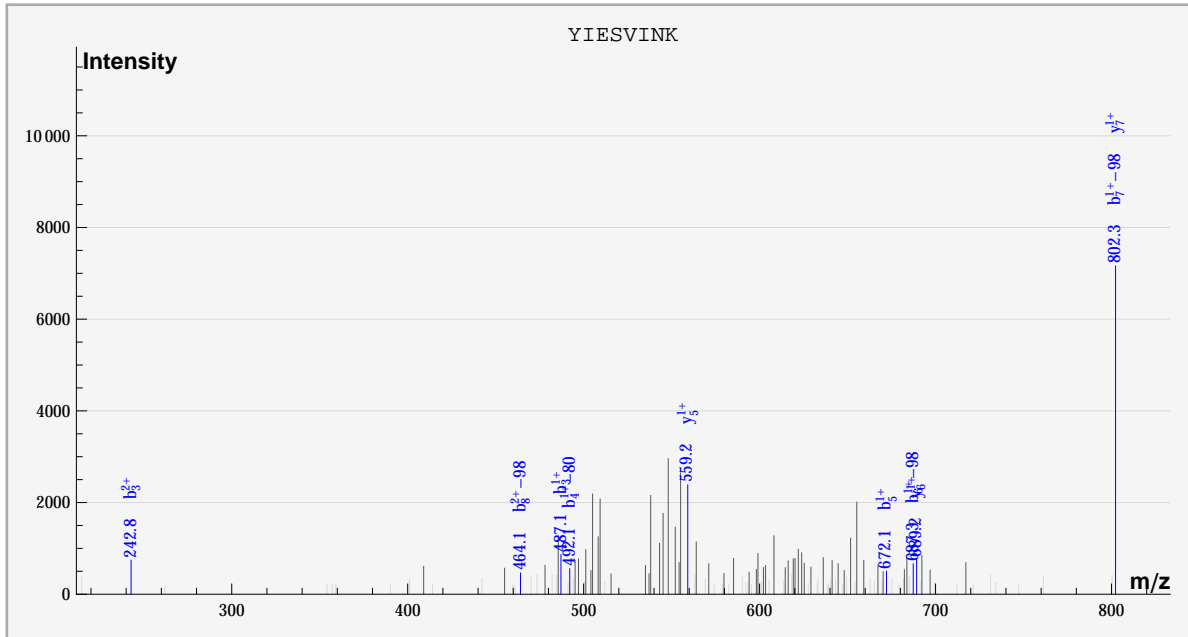

|   | # | b | b* | # | y | y* | P | P* |
|---|---|---|----|---|---|----|---|----|
| Y | 1 |   |    |   |   |    |   |    |
| I | 2 |   |    | 7 | ✓ |    |   |    |
| E | 3 | ✓ |    | 6 | ✓ |    |   |    |
| S | 4 |   | ✓  | 5 | ✓ |    |   |    |
| V | 5 | ✓ |    | 4 |   |    |   |    |
| I | 6 |   | ✓  | 3 |   |    |   |    |
| N | 7 |   | ✓  | 2 |   |    |   |    |
| K | 8 |   | ✓  | 1 |   |    |   |    |

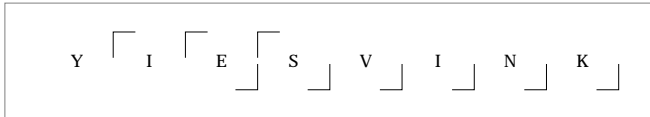

dbValid true SNKYFRR PHOS(1) 2. 526. -0.252343 4.96934 100. ? 1758.

S\_Acido\_new%gi|68566567|gb|AAY79496.1| SNKYFRR%:PHOS::::::%sample\_0%cmpd\_476

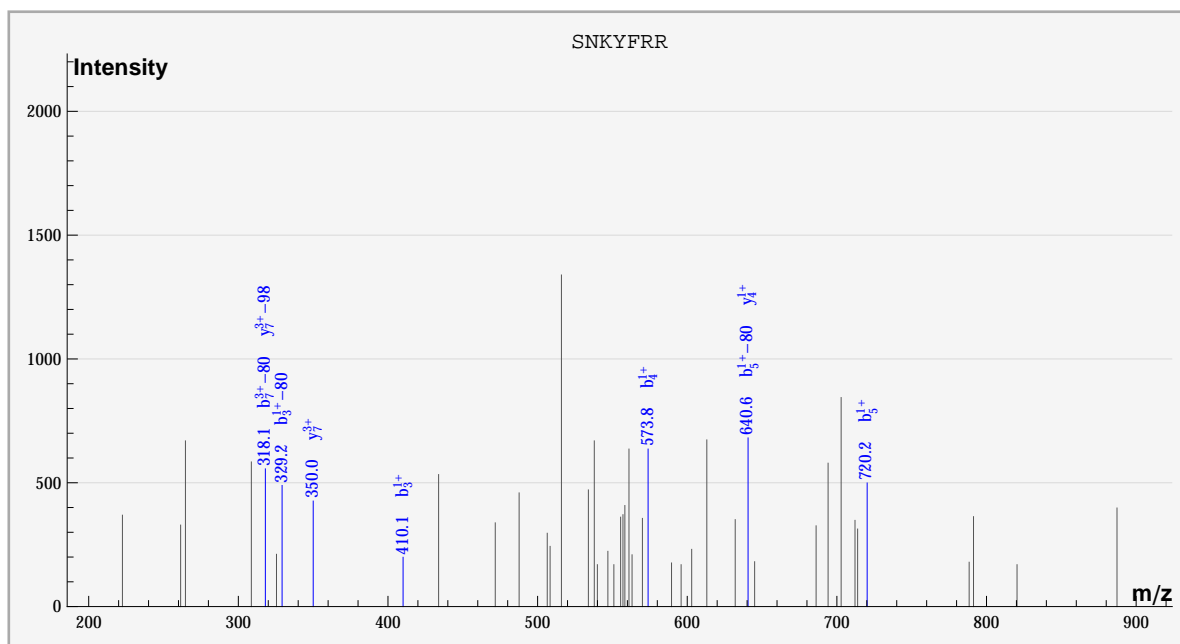

|   | # | b | b* | # | y | y* | P | P* |
|---|---|---|----|---|---|----|---|----|
| S | 1 |   |    |   |   |    | ✓ | ✓  |
| N | 2 |   |    | 6 |   |    |   |    |
| K | 3 | ✓ | ✓  | 5 |   |    |   |    |
| Y | 4 | ✓ |    | 4 | ✓ |    |   |    |
| F | 5 | ✓ | ✓  | 3 |   |    |   |    |
| R | 6 |   |    | 2 |   |    |   |    |
| R | 7 |   | ✓  | 1 |   |    |   |    |

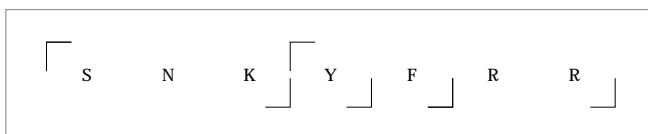

dbValid true SLKSILRR PHOS(1) 2. 526. 0.802427 5.50184 100. ? 3186.  
 S\_Acido\_new%gi68566820|gb|AAY79749.1| SLKSILRR%:PHOS:.....%sample\_3%compd\_1797

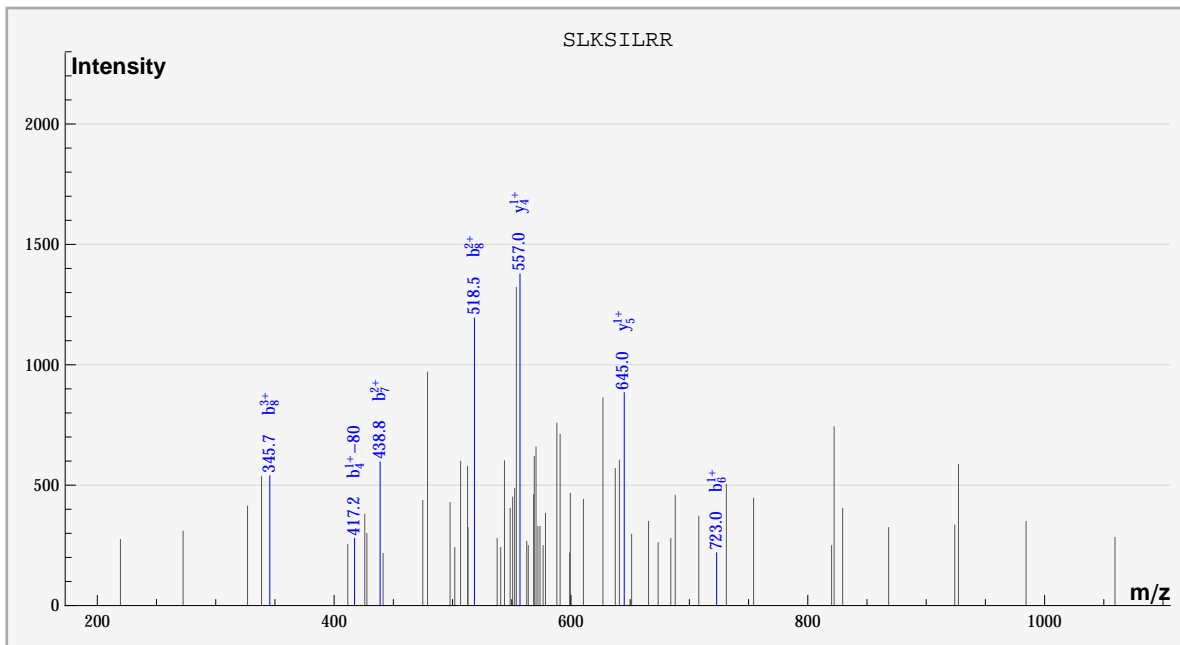

|   | # | b | b* | # | y | y* | P | P* |
|---|---|---|----|---|---|----|---|----|
| S | 1 |   |    |   |   |    |   |    |
| L | 2 |   |    | 7 |   |    |   |    |
| K | 3 |   |    | 6 |   |    |   |    |
| S | 4 |   | ✓  | 5 | ✓ |    |   |    |
| I | 5 |   |    | 4 | ✓ |    |   |    |
| L | 6 | ✓ |    | 3 |   |    |   |    |
| R | 7 | ✓ |    | 2 |   |    |   |    |
| R | 8 | ✓ |    | 1 |   |    |   |    |

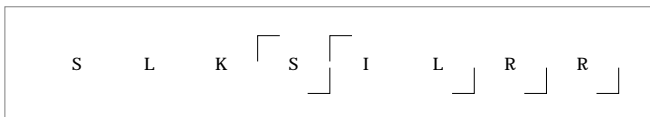

dbValid true YSKGMVQR PHOS(1) 2. 526. -1.2641 4.90847 100. ? 3330.  
 S\_Acido\_new%gi|68568662|gb|AA81591.1| YSKGMVQR%::PHOS:::sample\_3%compd\_1929

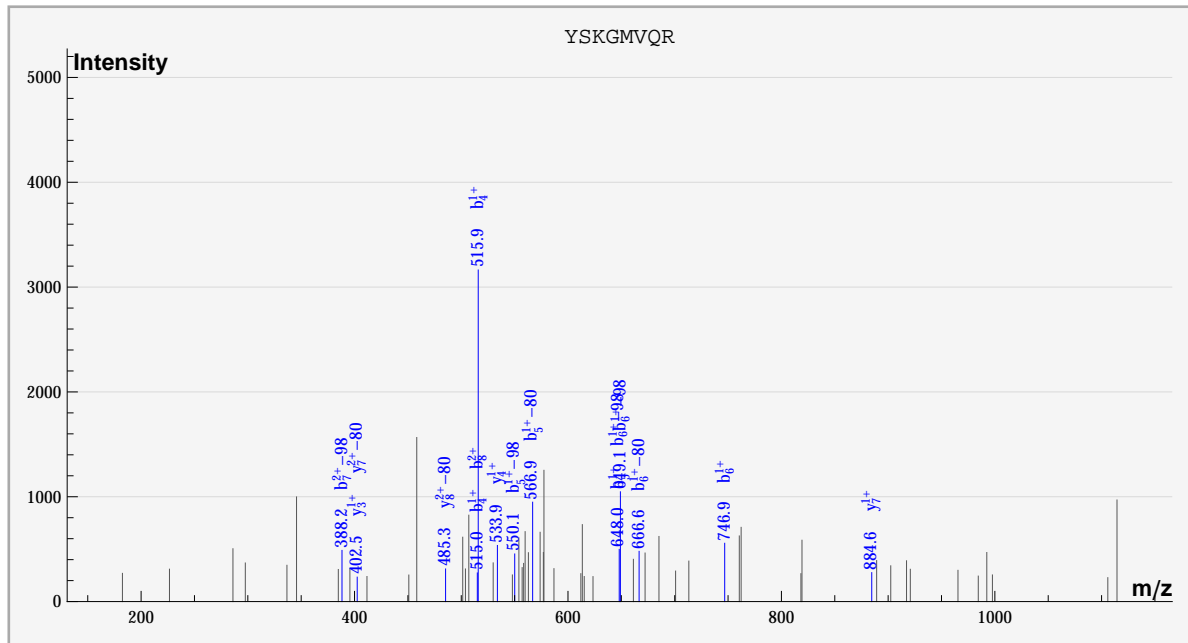

|   | # | b | b* | # | y | y* | P | P* |
|---|---|---|----|---|---|----|---|----|
| Y | 1 |   |    |   |   |    |   | ✓  |
| S | 2 |   |    | 7 | ✓ | ✓  |   |    |
| K | 3 |   |    | 6 |   |    |   |    |
| G | 4 | ✓ |    | 5 |   |    |   |    |
| M | 5 | ✓ | ✓  | 4 | ✓ |    |   |    |
| V | 6 | ✓ | ✓  | 3 | ✓ |    |   |    |
| Q | 7 |   | ✓  | 2 |   |    |   |    |
| R | 8 | ✓ |    | 1 |   |    |   |    |

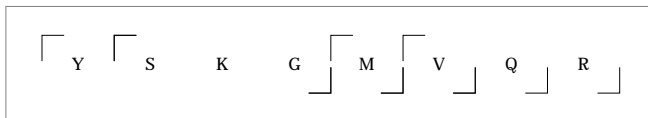



dbValid true IVSIGSGEK PHOS(2) 2. 526. -0.780603 4.88439 100. ? 3366.  
 S\_Acido\_new%gi|68566941|gb|AA79870.1| IVSIGSGEK%::PHOS::PHOS:::%sample\_3%compd\_1962

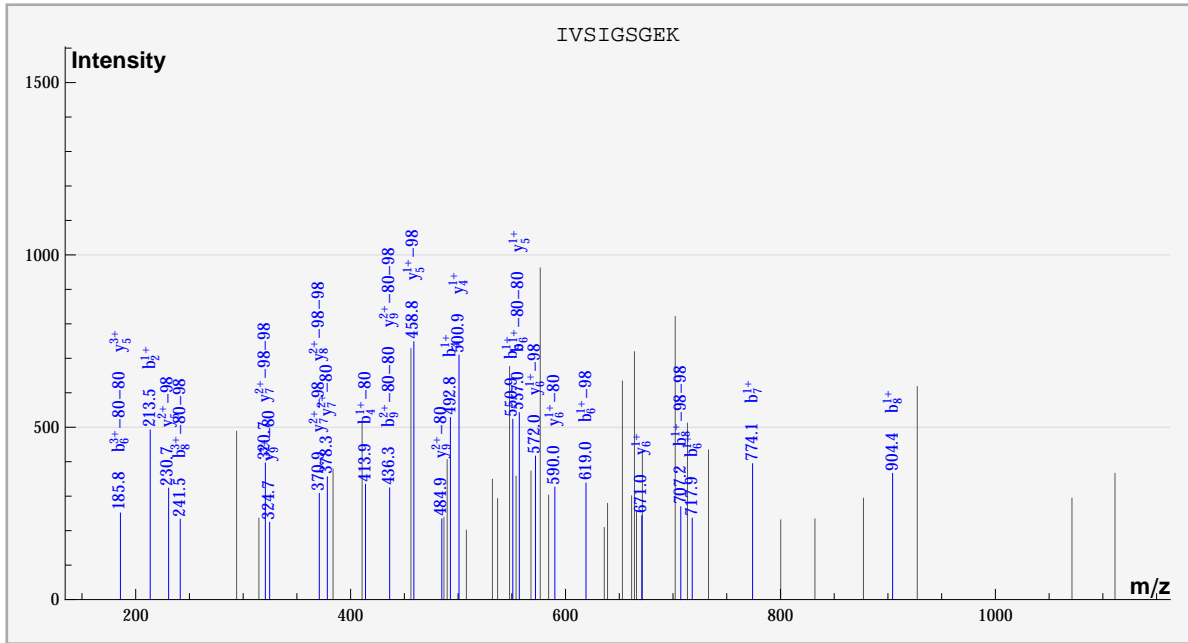

|   | # | b | b* | # | y | y* | P | P* |
|---|---|---|----|---|---|----|---|----|
| I | 1 |   |    |   |   |    |   | ✓  |
| V | 2 | ✓ |    | 8 |   | ✓  |   |    |
| S | 3 |   |    | 7 |   | ✓  |   |    |
| I | 4 | ✓ | ✓  | 6 | ✓ | ✓  |   |    |
| G | 5 | ✓ |    | 5 | ✓ | ✓  |   |    |
| S | 6 | ✓ | ✓  | 4 | ✓ |    |   |    |
| G | 7 | ✓ |    | 3 |   |    |   |    |
| E | 8 | ✓ | ✓  | 2 |   |    |   |    |
| K | 9 |   | ✓  | 1 |   |    |   |    |

I V S I G S G E K

dbValid true HRGRGVYK PHOS(1) 2. 526. 0.761092 5.64745 100. ? 3786.  
 S\_Acido\_new%gi|68566861|gb|AAY79790.1| HRGRGVYK%::::::PHOS::%sample\_3%cmpd\_2347

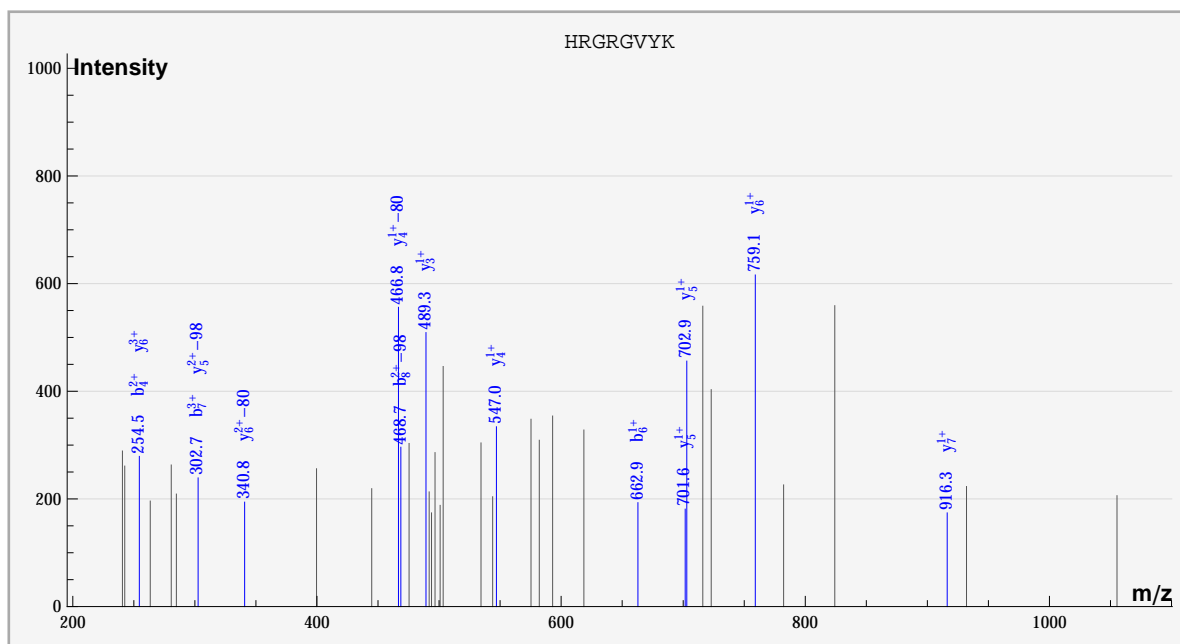

|   | # | b | b* | # | y | y* | P | P* |
|---|---|---|----|---|---|----|---|----|
| H | 1 |   |    |   |   |    |   |    |
| R | 2 |   |    | 7 | ✓ |    |   |    |
| G | 3 |   |    | 6 | ✓ | ✓  |   |    |
| R | 4 | ✓ |    | 5 | ✓ | ✓  |   |    |
| G | 5 |   |    | 4 | ✓ | ✓  |   |    |
| V | 6 | ✓ |    | 3 | ✓ |    |   |    |
| Y | 7 | ✓ |    | 2 |   |    |   |    |
| K | 8 |   | ✓  | 1 |   |    |   |    |

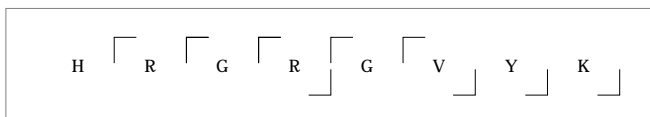

dbValid true YVIVSVSK PHOS(2) 2. 526. 1.73469 5.33139 100. ? 4134.

S\_Acido\_new%gi|68567041|gb|AA79970.1| YVIVSVSK%:PHOS:::PHOS::%sample\_3%compd\_2667

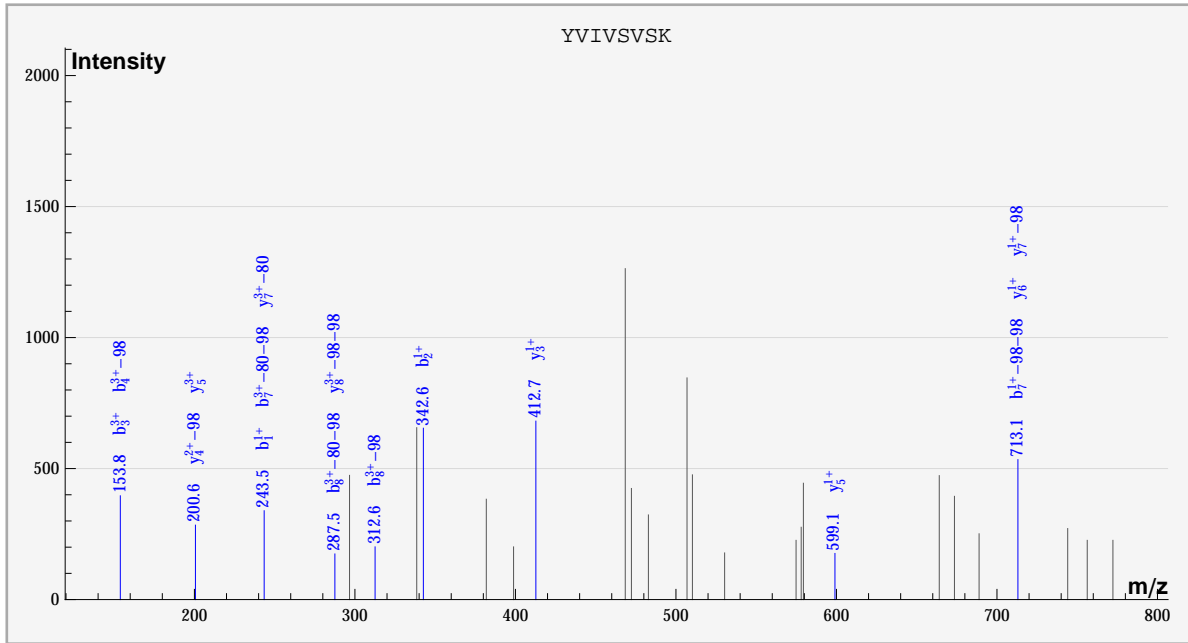

|   | # | b | b* | # | y | y* | P | P* |
|---|---|---|----|---|---|----|---|----|
| Y | 1 | ✓ |    |   |   |    |   | ✓  |
| V | 2 | ✓ |    | 7 |   | ✓  |   |    |
| I | 3 | ✓ |    | 6 | ✓ |    |   |    |
| V | 4 |   | ✓  | 5 | ✓ |    |   |    |
| S | 5 |   |    | 4 |   | ✓  |   |    |
| V | 6 |   |    | 3 | ✓ |    |   |    |
| S | 7 | ✓ |    | 2 |   |    |   |    |
| K | 8 | ✓ |    | 1 |   |    |   |    |

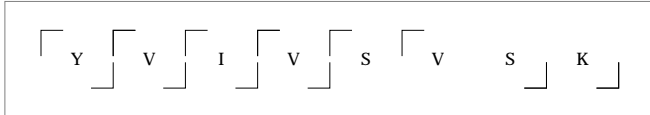

dbValid true YVKPELPK PHOS(1) 2. 526. 1.27263 4.90167 100. ? 4266.  
 S\_Acido\_new%gi|68567532|gb|AAV80461.1| YVKPELPK%:PHOS:::sample\_3%compd\_2788

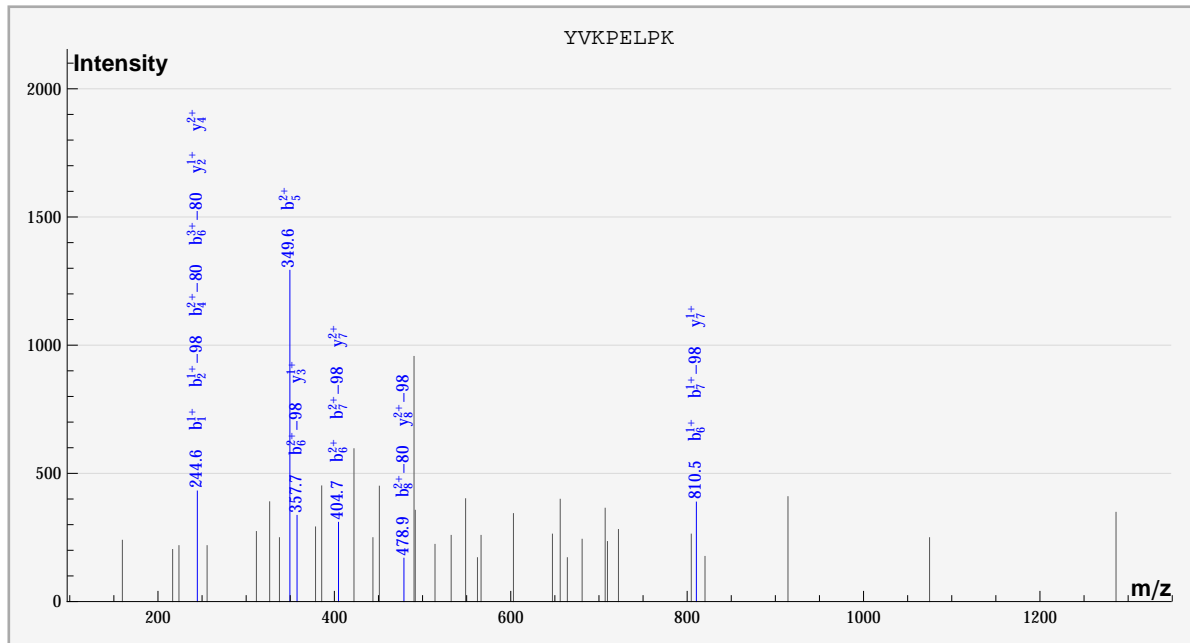

|   | # | b | b* | # | y | y* | P | P* |
|---|---|---|----|---|---|----|---|----|
| Y | 1 | ✓ |    |   |   |    |   | ✓  |
| V | 2 |   | ✓  | 7 | ✓ |    |   |    |
| K | 3 |   |    | 6 |   |    |   |    |
| P | 4 |   | ✓  | 5 |   |    |   |    |
| E | 5 | ✓ |    | 4 | ✓ |    |   |    |
| L | 6 | ✓ | ✓  | 3 | ✓ |    |   |    |
| P | 7 |   | ✓  | 2 | ✓ |    |   |    |
| K | 8 |   | ✓  | 1 |   |    |   |    |

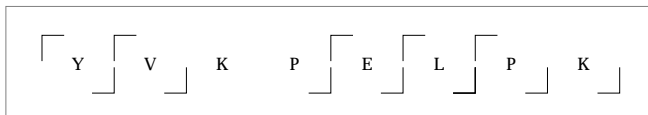

dbValid true LYSISGKK PHOS(2) 2. 527. 1.23231 4.96361 100. ? 1842.

S\_Acido\_new%gil68566702|gb|AAY79631.1| LYSISGKK%::PHOS::PHOS:::%sample\_0%cmpd\_549

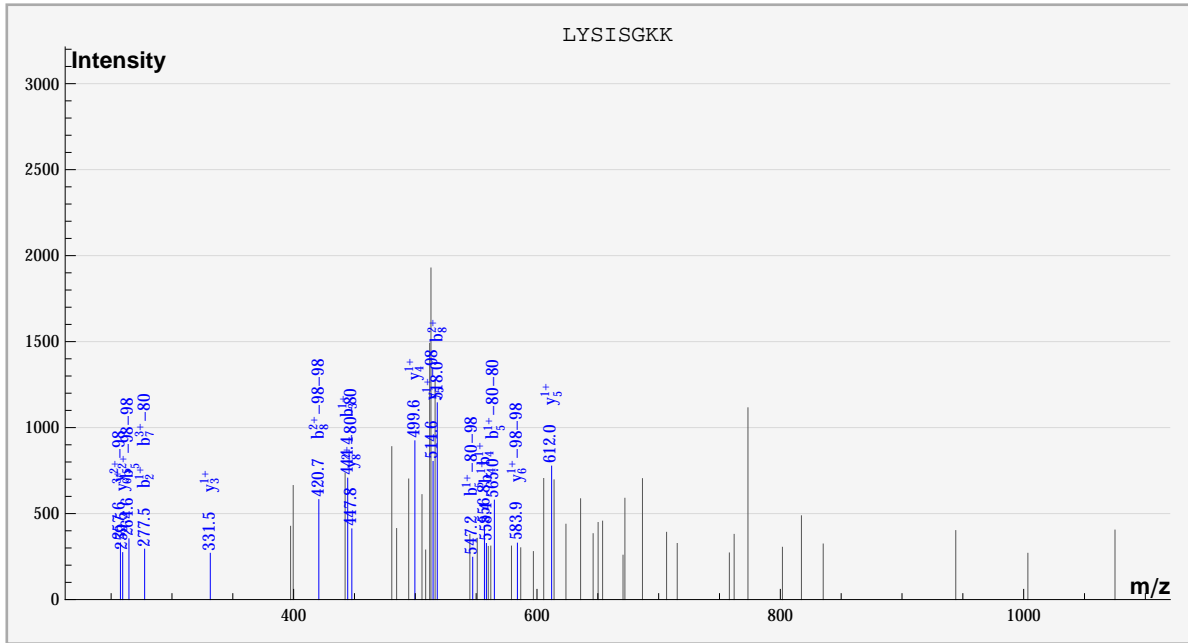

|   | # | b | b* | # | y | y* | P | P* |
|---|---|---|----|---|---|----|---|----|
| L | 1 |   |    |   |   |    |   | ✓  |
| Y | 2 | ✓ |    | 7 |   |    |   |    |
| S | 3 | ✓ |    | 6 | ✓ | ✓  |   |    |
| I | 4 | ✓ |    | 5 | ✓ | ✓  |   |    |
| S | 5 |   | ✓  | 4 | ✓ |    |   |    |
| G | 6 |   |    | 3 | ✓ |    |   |    |
| K | 7 |   | ✓  | 2 |   |    |   |    |
| K | 8 | ✓ | ✓  | 1 |   |    |   |    |

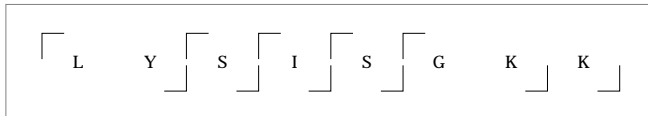

dbValid true ISLYKMSK PHOS(1) 2. 527. -1.74132 5.30884 100. ? 3510.  
 S\_Acido\_new%gi68567095|gb|AAY80024.1| ISLYKMSK%::PHOS:::sample\_3%compd\_2096

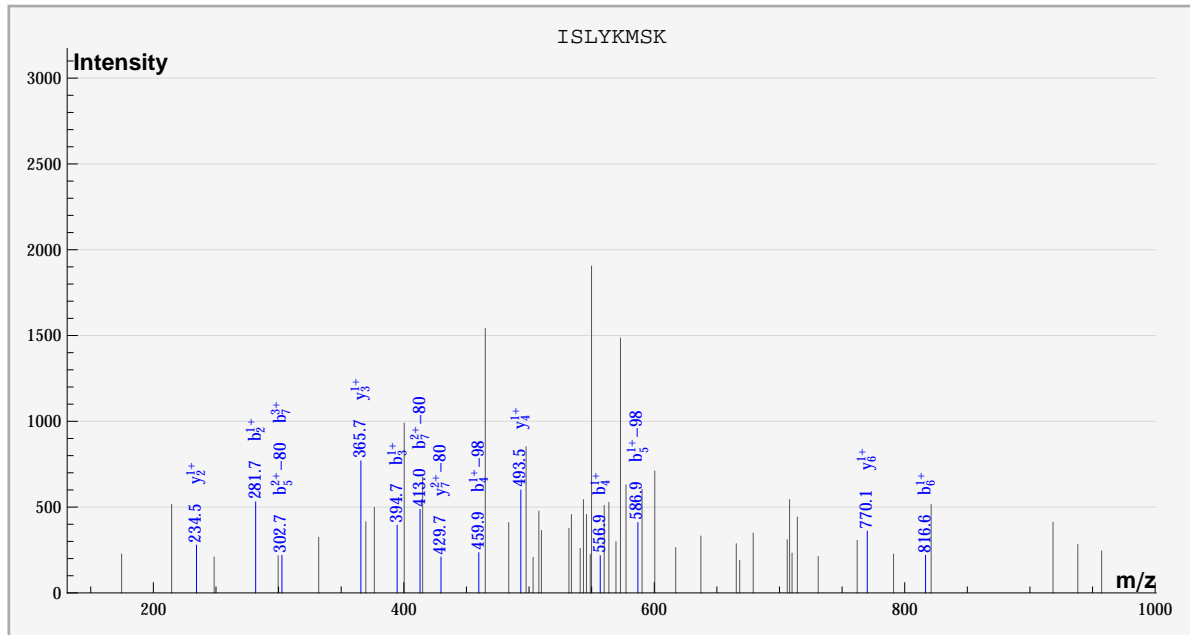

|   | # | b | b* | # | y | y* | P | P* |
|---|---|---|----|---|---|----|---|----|
| I | 1 |   |    |   |   |    |   |    |
| S | 2 | ✓ |    | 7 |   | ✓  |   |    |
| L | 3 | ✓ |    | 6 | ✓ |    |   |    |
| Y | 4 | ✓ | ✓  | 5 |   |    |   |    |
| K | 5 |   | ✓  | 4 | ✓ |    |   |    |
| M | 6 | ✓ |    | 3 | ✓ |    |   |    |
| S | 7 | ✓ | ✓  | 2 | ✓ |    |   |    |
| K | 8 |   |    | 1 |   |    |   |    |

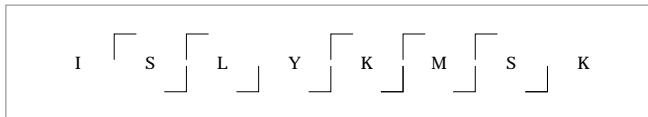

dbValid true DYDSNTKK PHOS(1) 2. 527. -1.2894 5.48972 100. ? 4650.  
 S\_Acido\_new%gil68567750|gb|AAy80679.1| DYDSNTKK%::PHOS:::sample\_3%compd\_3142

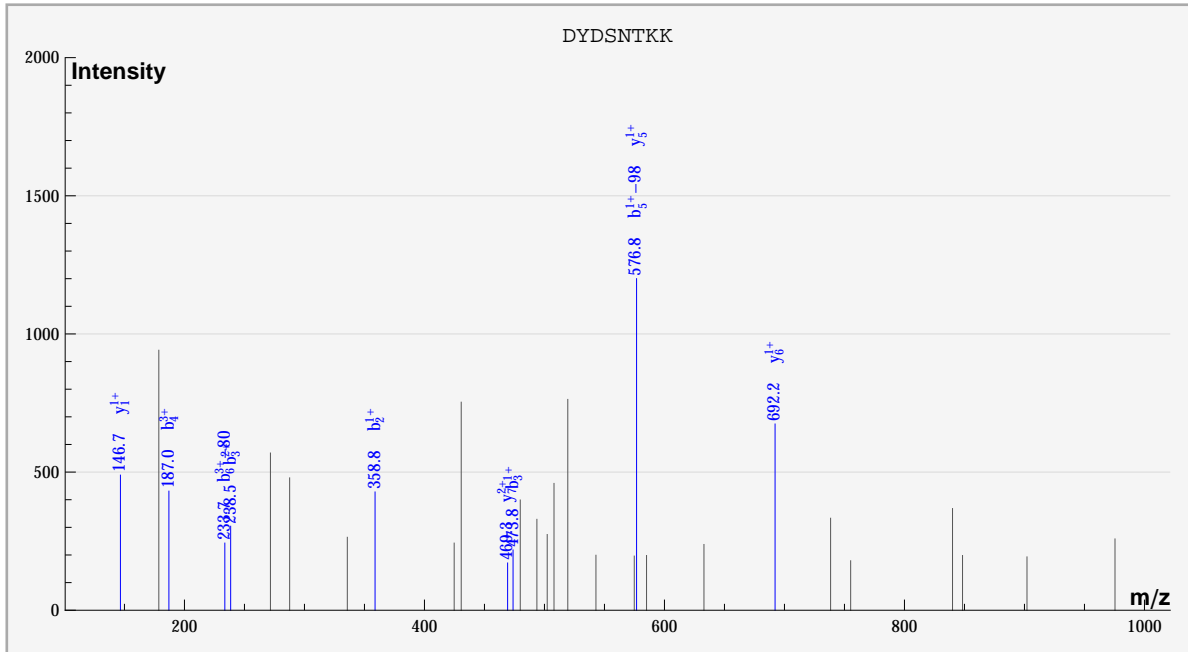

|   | # | b | b* | # | y | y* | P | P* |
|---|---|---|----|---|---|----|---|----|
| D | 1 |   |    |   |   |    |   |    |
| Y | 2 | ✓ |    | 7 | ✓ |    |   |    |
| D | 3 | ✓ |    | 6 | ✓ |    |   |    |
| S | 4 | ✓ |    | 5 | ✓ |    |   |    |
| N | 5 |   | ✓  | 4 |   |    |   |    |
| T | 6 |   | ✓  | 3 |   |    |   |    |
| K | 7 |   |    | 2 |   |    |   |    |
| K | 8 |   |    | 1 | ✓ |    |   |    |

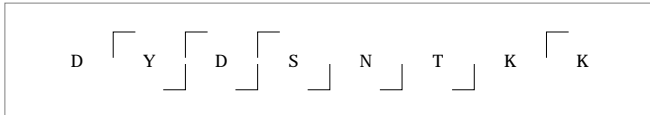

dbValid true EYYITKR PHOS(1) 2. 528. -1.25575 5.26068 100. ? 1560.  
 S\_Acido\_new%gi|68567343|gb|AAY80272.1| EYYITKR%::PHOS:::sample\_3%compd\_304

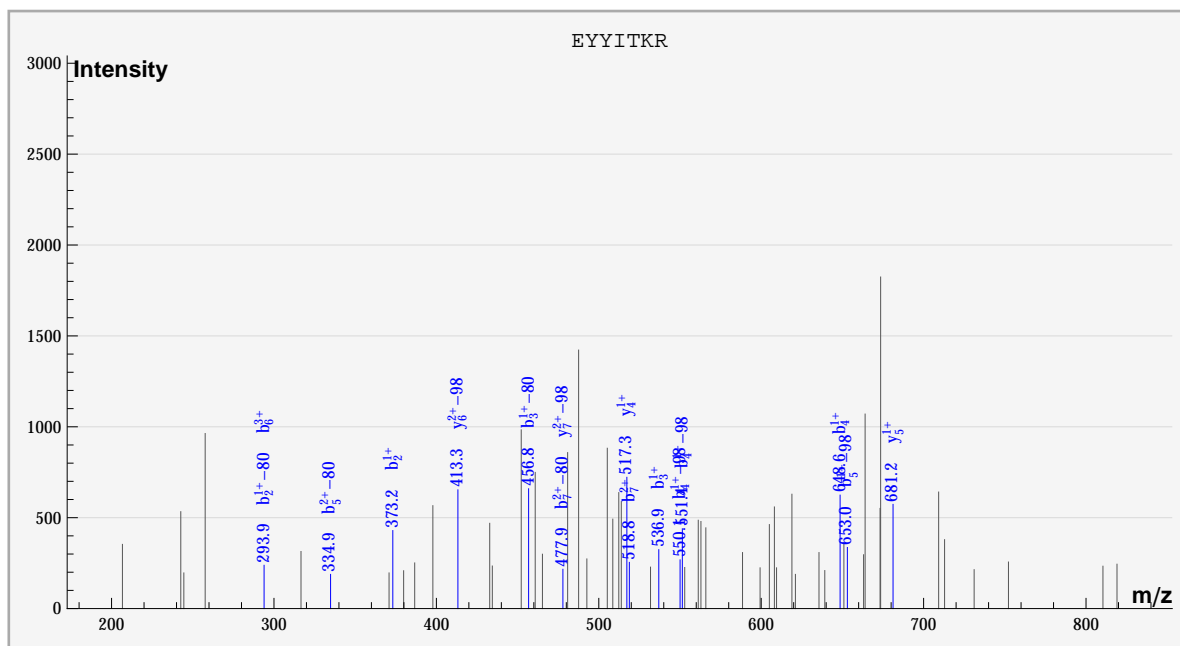

|   | # | b | b* | # | y | y* | P | P* |
|---|---|---|----|---|---|----|---|----|
| E | 1 |   |    |   |   |    |   | ✓  |
| Y | 2 | ✓ | ✓  | 6 |   | ✓  |   |    |
| Y | 3 | ✓ | ✓  | 5 | ✓ |    |   |    |
| I | 4 | ✓ | ✓  | 4 | ✓ |    |   |    |
| T | 5 |   | ✓  | 3 |   |    |   |    |
| K | 6 | ✓ |    | 2 |   |    |   |    |
| R | 7 | ✓ | ✓  | 1 |   |    |   |    |

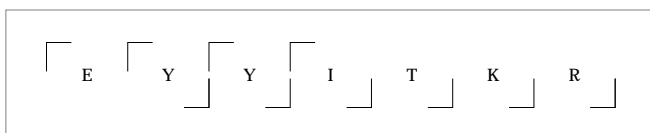



dbValid true YFSGEPFK PHOS(1) 2. 528. -0.282308 4.94145 100. ? 1866.  
 S\_Acido\_new%gi|68567511|gb|AAY80440.1| YFSGEPFK%:PHOS:::sample\_3%compd\_592

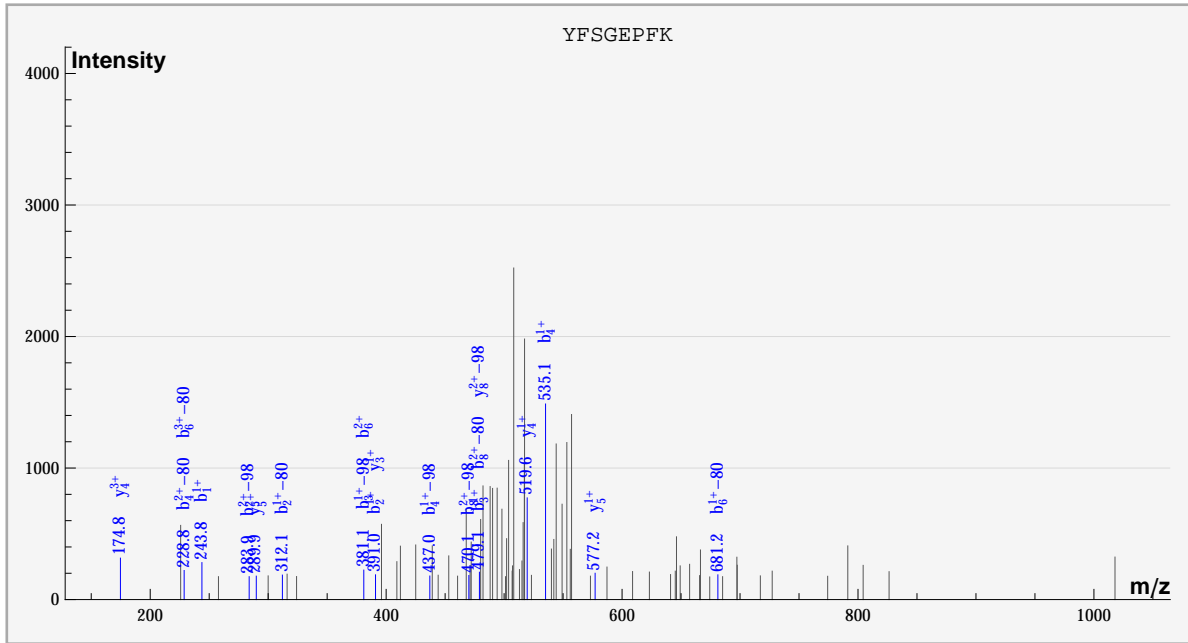

|   | # | b | b* | # | y | y* | P | P* |
|---|---|---|----|---|---|----|---|----|
| Y | 1 | ✓ |    |   |   |    |   | ✓  |
| F | 2 | ✓ | ✓  | 7 |   |    |   |    |
| S | 3 | ✓ | ✓  | 6 |   |    |   |    |
| G | 4 | ✓ | ✓  | 5 | ✓ |    |   |    |
| E | 5 |   | ✓  | 4 | ✓ |    |   |    |
| P | 6 | ✓ | ✓  | 3 | ✓ |    |   |    |
| F | 7 |   |    | 2 |   |    |   |    |
| K | 8 |   | ✓  | 1 |   |    |   |    |

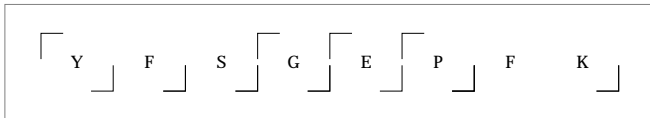

dbValid true EKYILKGGK PHOS(1) 2. 528. 1.78591 4.87695 100. ? 2568.

S\_Acido\_new%gi|68566538|gb|AA79467.1| EKYILKGGK%:::PHOS:::sample\_0%cmpd\_1174

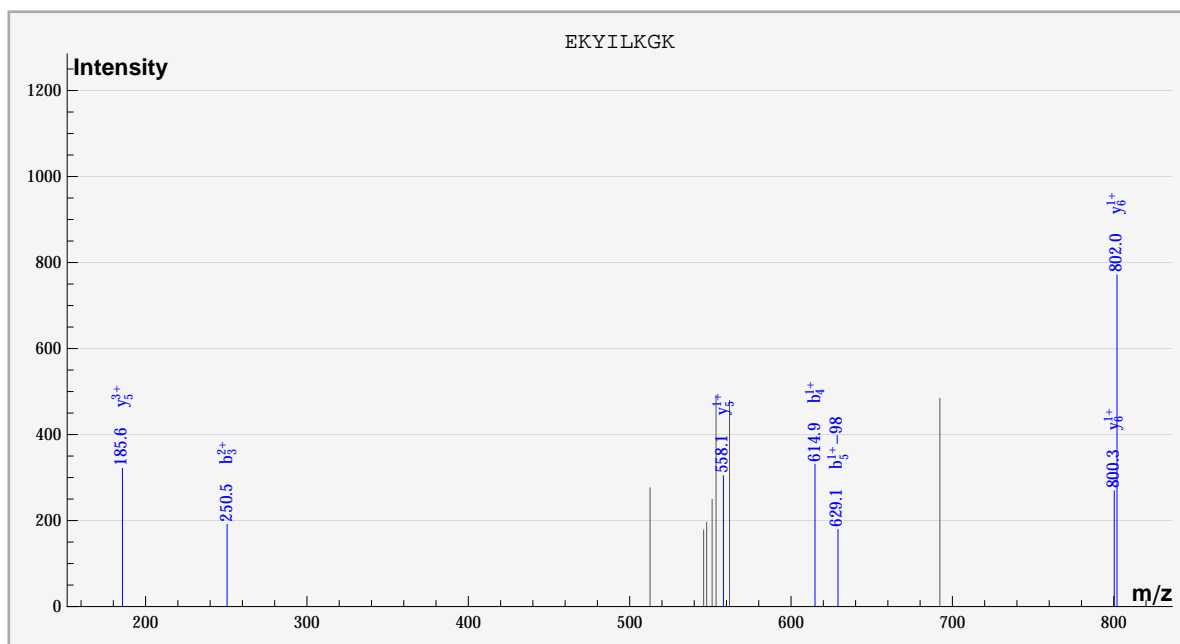

|   | # | b | b* | # | y | y* | P | P* |
|---|---|---|----|---|---|----|---|----|
| E | 1 |   |    |   |   |    |   |    |
| K | 2 |   |    | 7 |   |    |   |    |
| Y | 3 | ✓ |    | 6 | ✓ |    |   |    |
| I | 4 | ✓ |    | 5 | ✓ |    |   |    |
| L | 5 |   | ✓  | 4 |   |    |   |    |
| K | 6 |   |    | 3 |   |    |   |    |
| G | 7 |   |    | 2 |   |    |   |    |
| K | 8 |   |    | 1 |   |    |   |    |

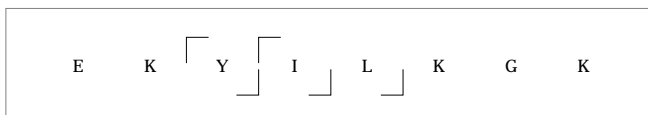

dbValid true QTDAGELSR PHOS(1) 2. 528. 0.721497 5.29813 100. ? 2622.  
 S\_Acido\_new%gi|68567040|gb|AA79969.1| QTDAGELSR%::PHOS%:::sample\_3%compd\_1279

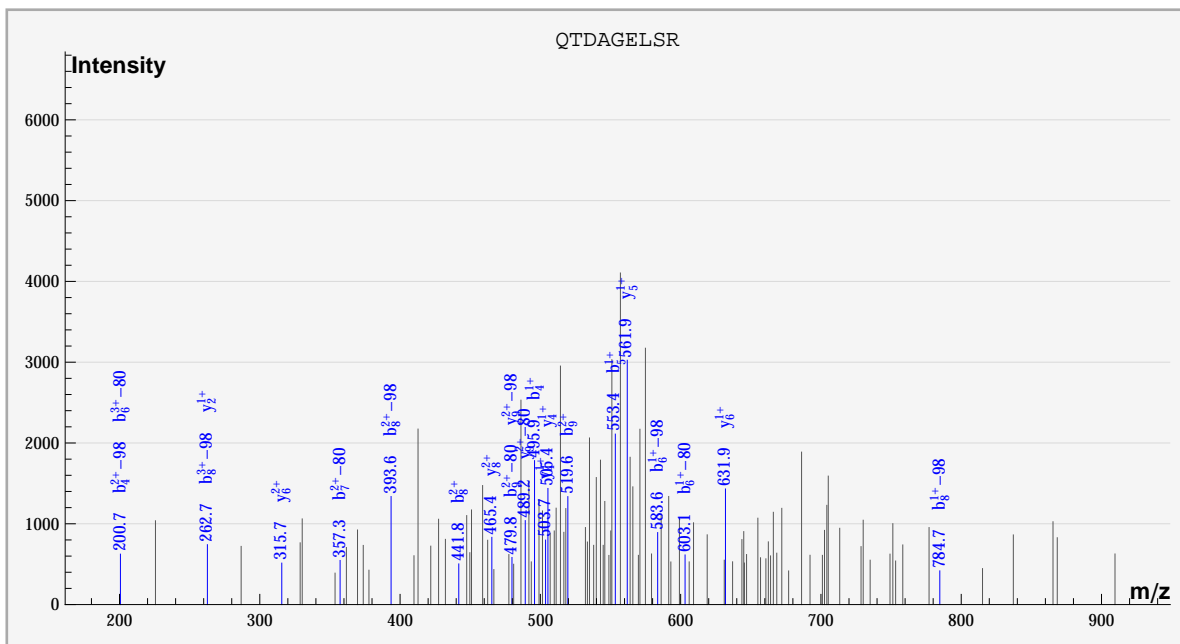

|   | # | b | b* | # | y | y* | P | P* |
|---|---|---|----|---|---|----|---|----|
| Q | 1 |   |    |   |   |    |   | ✓  |
| T | 2 |   |    | 8 | ✓ |    |   |    |
| D | 3 |   |    | 7 |   |    |   |    |
| A | 4 | ✓ | ✓  | 6 | ✓ |    |   |    |
| G | 5 | ✓ |    | 5 | ✓ |    |   |    |
| E | 6 |   | ✓  | 4 | ✓ |    |   |    |
| L | 7 |   | ✓  | 3 |   |    |   |    |
| S | 8 | ✓ | ✓  | 2 | ✓ |    |   |    |
| R | 9 | ✓ | ✓  | 1 |   |    |   |    |

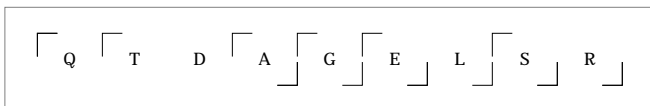

dbValid true TQSRISRK PHOS(1) 2. 528. 0.271497 5.89513 100. ? 2850.  
 S\_Acido\_new%gi|68568638|gb|AAY81567.1| TQSRISRK%:::::PHOS:::sample\_3%compd\_1489

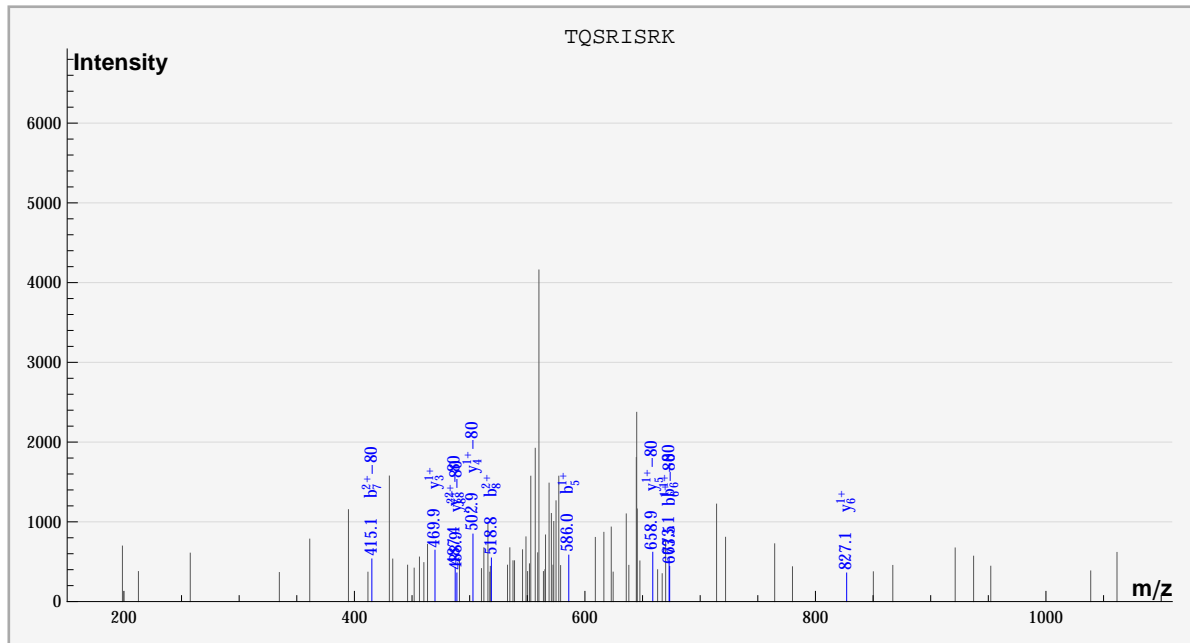

|   | # | b | b* | # | y | y* | P | P* |
|---|---|---|----|---|---|----|---|----|
| T | 1 |   |    |   |   |    |   | ✓  |
| Q | 2 |   |    | 7 |   |    |   |    |
| S | 3 |   |    | 6 | ✓ |    |   |    |
| R | 4 |   |    | 5 |   | ✓  |   |    |
| I | 5 | ✓ |    | 4 |   | ✓  |   |    |
| S | 6 |   | ✓  | 3 | ✓ |    |   |    |
| R | 7 |   | ✓  | 2 |   |    |   |    |
| K | 8 | ✓ |    | 1 |   |    |   |    |

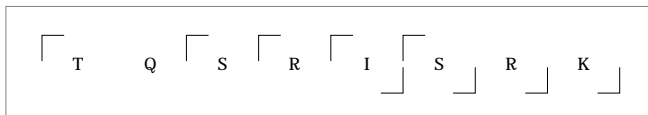

dbValid true IIRISNKK PHOS(1) 2. 528. -1.6952 5.52966 100. ? 3078.  
 S\_Acido\_new%gi|68567169|gb|AAY80098.1| IIRISNKK%::::PHOS::::%sample\_3%compd\_1699

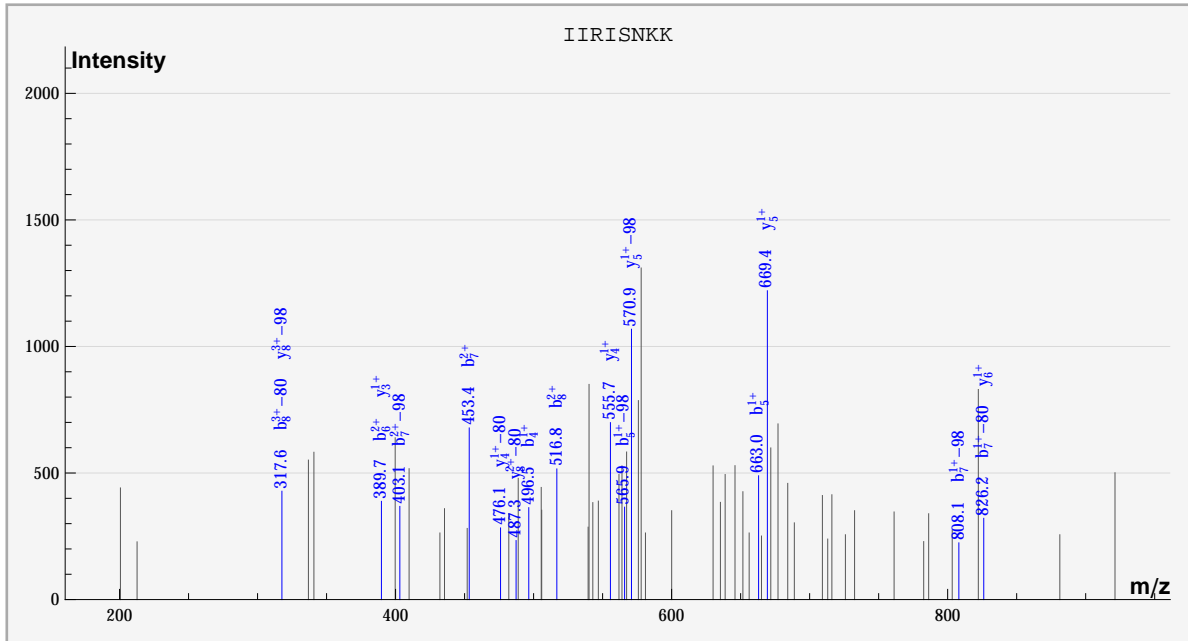

|   | # | b | b* | # | y | y* | P | P* |
|---|---|---|----|---|---|----|---|----|
| I | 1 |   |    |   |   |    |   | ✓  |
| I | 2 |   |    | 7 |   |    |   |    |
| R | 3 |   |    | 6 | ✓ |    |   |    |
| I | 4 | ✓ |    | 5 | ✓ | ✓  |   |    |
| S | 5 | ✓ | ✓  | 4 | ✓ | ✓  |   |    |
| N | 6 | ✓ |    | 3 | ✓ |    |   |    |
| K | 7 | ✓ | ✓  | 2 |   |    |   |    |
| K | 8 | ✓ | ✓  | 1 |   |    |   |    |

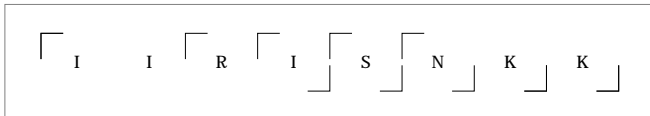

dbValid true YMETTR Oxidation\_M(1),PHOS(3) 2. 528. 0.630907 4.93418 100. ? 366.  
 S\_Acido\_new%gil68568456|gb|AAY81385.1| YMETTR%:PHOS:Oxidation\_M::PHOS:PHOS::%sample\_3%compd\_2185

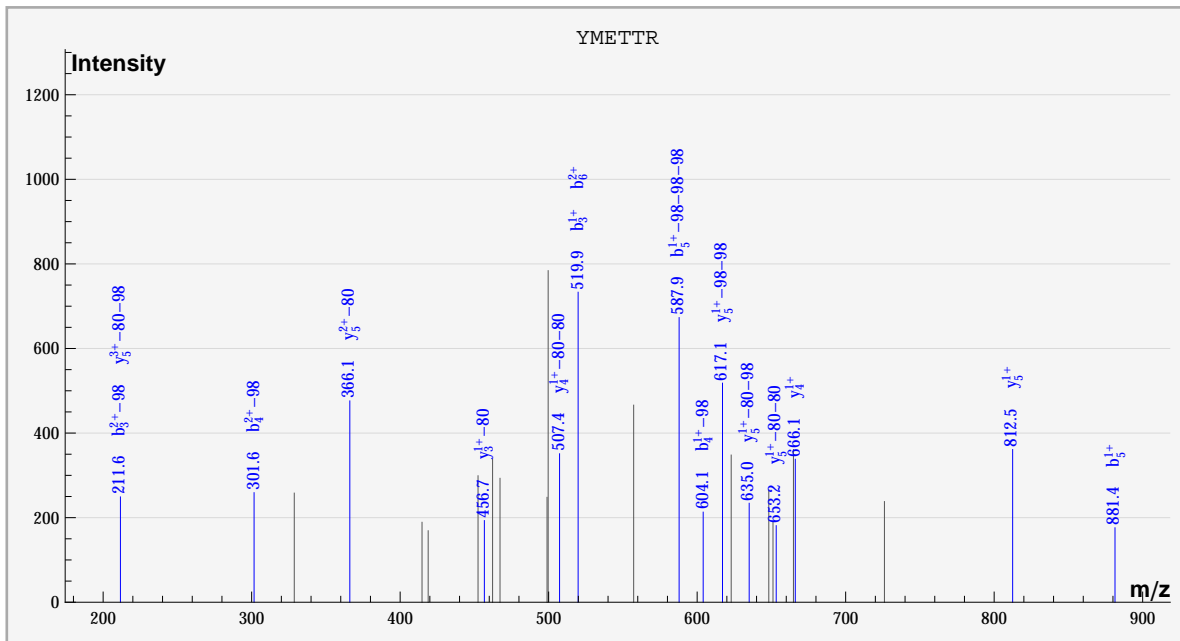

|   | # | b | b* | # | y | y* | P | P* |
|---|---|---|----|---|---|----|---|----|
| Y | 1 |   |    |   |   |    |   |    |
| M | 2 |   |    | 5 | ✓ | ✓  |   |    |
| E | 3 | ✓ | ✓  | 4 | ✓ | ✓  |   |    |
| T | 4 |   | ✓  | 3 |   | ✓  |   |    |
| T | 5 | ✓ | ✓  | 2 |   |    |   |    |
| R | 6 | ✓ |    | 1 |   |    |   |    |

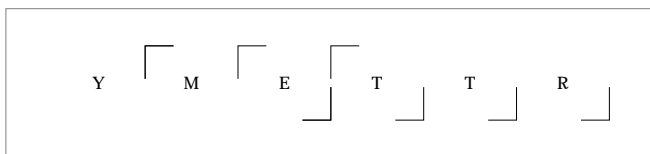

dbValid true RLAESIKR PHOS(1) 2. 528. -1.21577 4.91954 100. ? 3966.

S\_Acido\_new%gi|68567774|gb|AAY80703.1| RLAESIKR%::::PHOS::::%sample\_3%cmpd\_2514

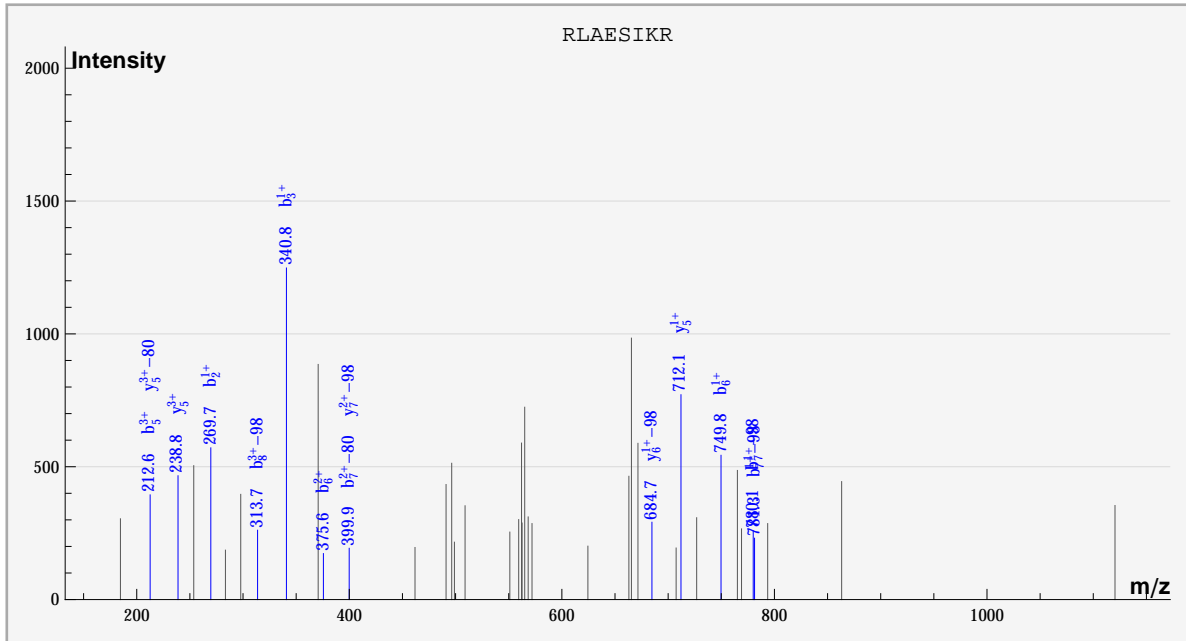

|   | # | b | b* | # | y | y* | P | P* |
|---|---|---|----|---|---|----|---|----|
| R | 1 |   |    |   |   |    |   |    |
| L | 2 | ✓ |    | 7 |   | ✓  |   |    |
| A | 3 | ✓ |    | 6 |   | ✓  |   |    |
| E | 4 |   |    | 5 | ✓ | ✓  |   |    |
| S | 5 | ✓ |    | 4 |   |    |   |    |
| I | 6 | ✓ |    | 3 |   |    |   |    |
| K | 7 |   | ✓  | 2 |   |    |   |    |
| R | 8 |   | ✓  | 1 |   |    |   |    |

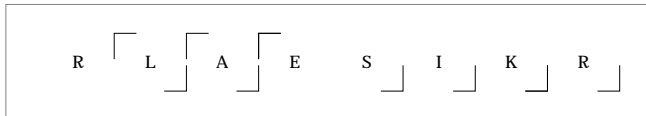

dbValid true EYYSKRR PHOS(1) 2. 528. -0.758128 5.07946 100. ? 4074.  
 S\_Acido\_new%gi|68568117|gb|AAY81046.1| EYYSKRR%::PHOS:::sample\_3%compd\_2477

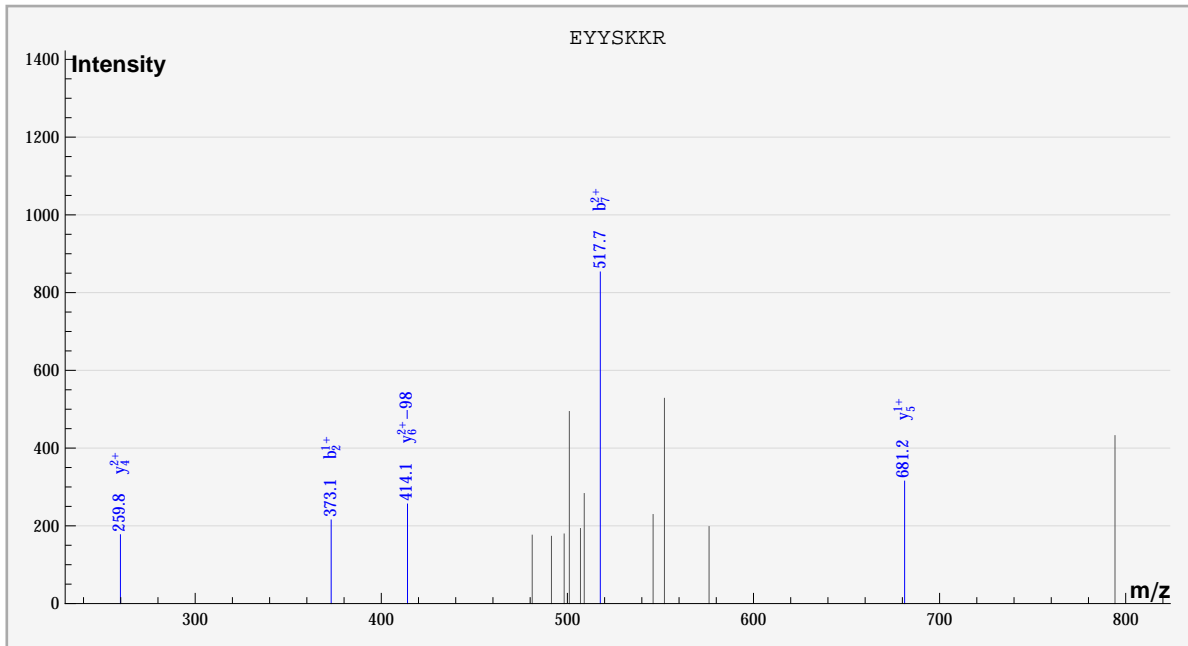

|   | # | b | b* | # | y | y* | P | P* |
|---|---|---|----|---|---|----|---|----|
| E | 1 |   |    |   |   |    |   |    |
| Y | 2 | ✓ |    | 6 |   | ✓  |   |    |
| Y | 3 |   |    | 5 | ✓ |    |   |    |
| S | 4 |   |    | 4 | ✓ |    |   |    |
| K | 5 |   |    | 3 |   |    |   |    |
| K | 6 |   |    | 2 |   |    |   |    |
| R | 7 | ✓ |    | 1 |   |    |   |    |

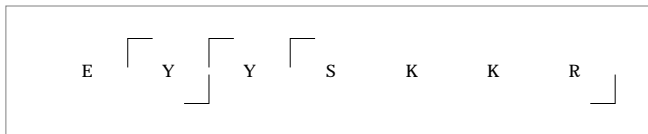



dbValid true EYYSKRR PHOS(1) 2. 528. -0.758128 5.11237 100. ? 4110.  
 S\_Acido\_new%gi|68568117|gb|AAY81046.1| EYYSKRR%::PHOS:::sample\_3%cmpd\_2506

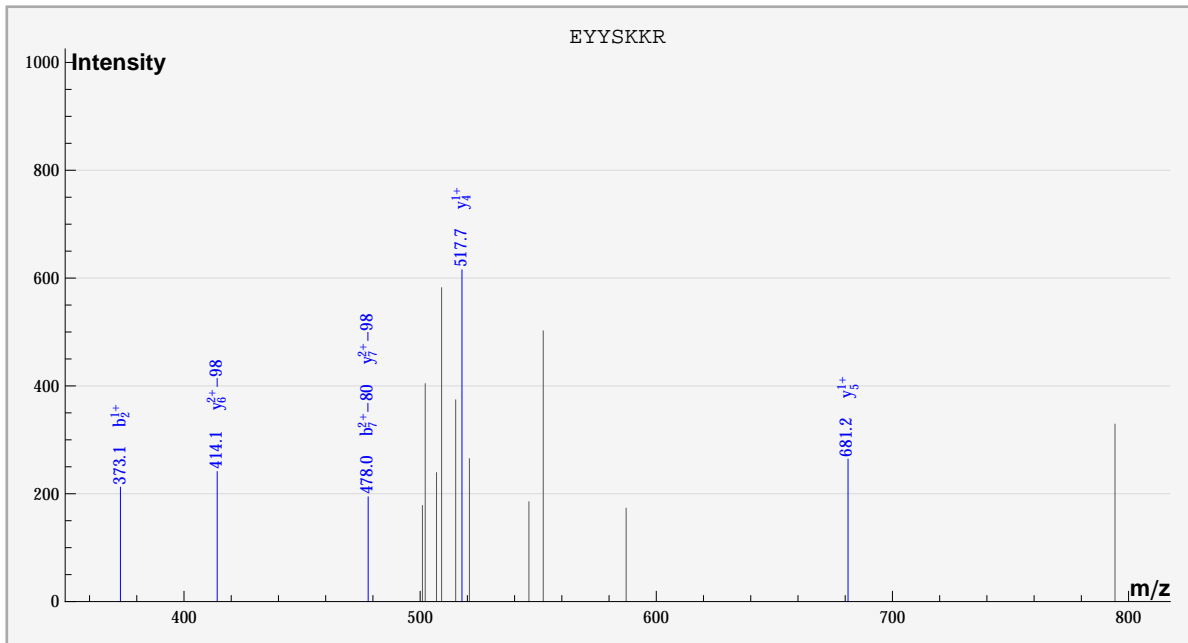

|   | # | b | b* | # | y | y* | P | P* |
|---|---|---|----|---|---|----|---|----|
| E | 1 |   |    |   |   |    |   | ✓  |
| Y | 2 | ✓ |    | 6 |   | ✓  |   |    |
| Y | 3 |   |    | 5 | ✓ |    |   |    |
| S | 4 |   |    | 4 | ✓ |    |   |    |
| K | 5 |   |    | 3 |   |    |   |    |
| K | 6 |   |    | 2 |   |    |   |    |
| R | 7 |   | ✓  | 1 |   |    |   |    |

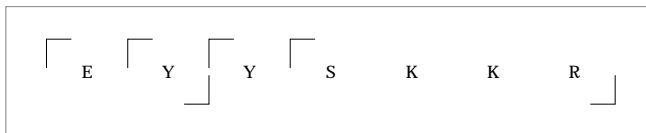

dbValid true KKNLLMTK PHOS(1) 2. 529. -0.712233 5.7323 100. ? 1476.  
 S\_Acido\_new%gi|68566742|gb|AAY79671.1| KKNLLMTK%::::::PHOS::%sample\_3%cmpd\_231

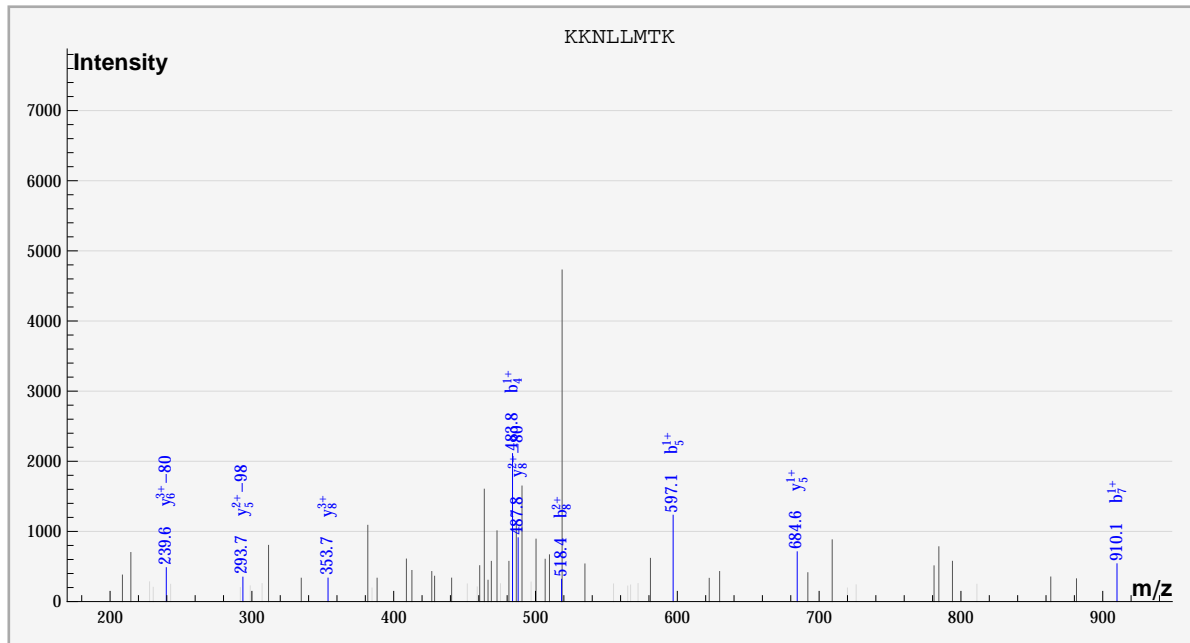

|   | # | b | b* | # | y | y* | P | P* |
|---|---|---|----|---|---|----|---|----|
| K | 1 |   |    |   |   |    | ✓ | ✓  |
| K | 2 |   |    | 7 |   |    |   |    |
| N | 3 |   |    | 6 |   | ✓  |   |    |
| L | 4 | ✓ |    | 5 | ✓ | ✓  |   |    |
| L | 5 | ✓ |    | 4 |   |    |   |    |
| M | 6 |   |    | 3 |   |    |   |    |
| T | 7 | ✓ |    | 2 |   |    |   |    |
| K | 8 | ✓ |    | 1 |   |    |   |    |

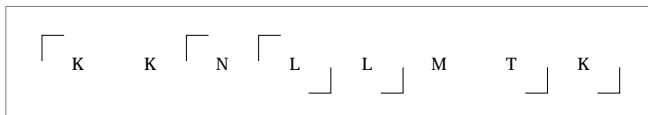

dbValid true GSNQAVSASR PHOS(1) 2. 529. -0.272883 5.68117 100. ? 1596.  
 S\_Acido\_new%gi|68566759|gb|AA79688.1| GSNQAVSASR%::PHOS:::sample\_3%compd\_340

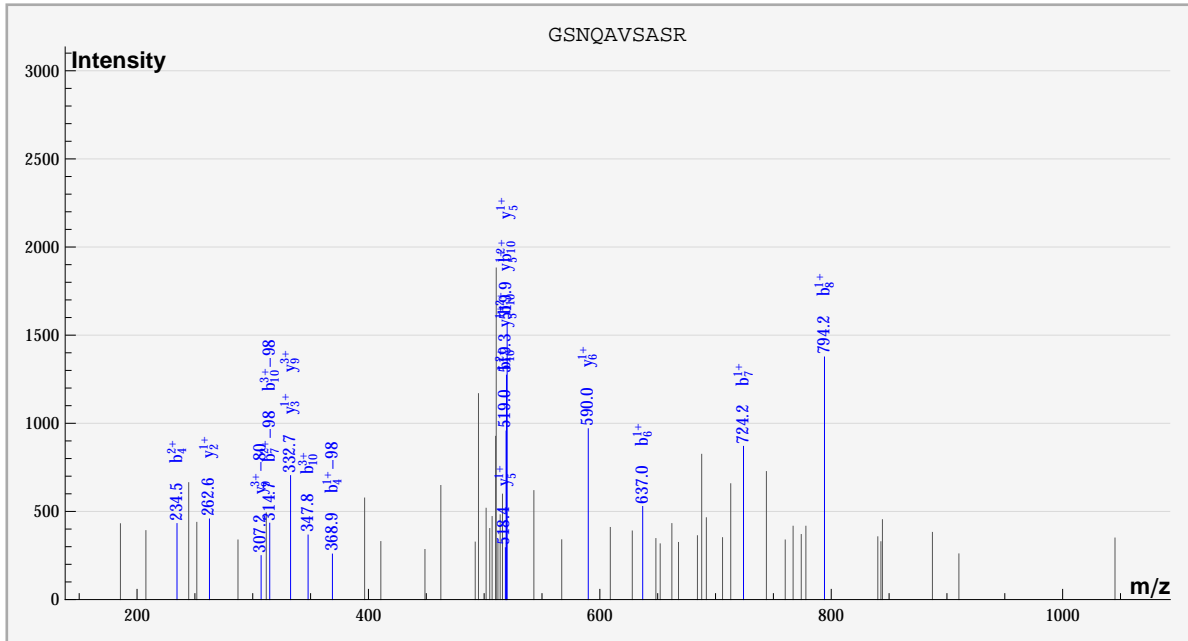

|   | #  | b | b* | # | y | y* | P | P* |
|---|----|---|----|---|---|----|---|----|
| G | 1  |   |    |   |   |    |   |    |
| S | 2  |   |    | 9 | ✓ | ✓  |   |    |
| N | 3  |   |    | 8 |   |    |   |    |
| Q | 4  | ✓ | ✓  | 7 |   |    |   |    |
| A | 5  |   |    | 6 | ✓ |    |   |    |
| V | 6  | ✓ |    | 5 | ✓ |    |   |    |
| S | 7  | ✓ | ✓  | 4 |   |    |   |    |
| A | 8  | ✓ |    | 3 | ✓ |    |   |    |
| S | 9  |   |    | 2 | ✓ |    |   |    |
| R | 10 | ✓ | ✓  | 1 |   |    |   |    |

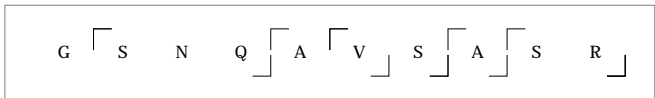

dbValid true ELTISGNIK PHOS(1) 2. 529. -1.23737 5.02918 100. ? 1866.  
 S\_Acido\_new%gi|68568021|gb|AAY80950.1| ELTISGNIK%:::PHOS:::sample\_3%compd\_593

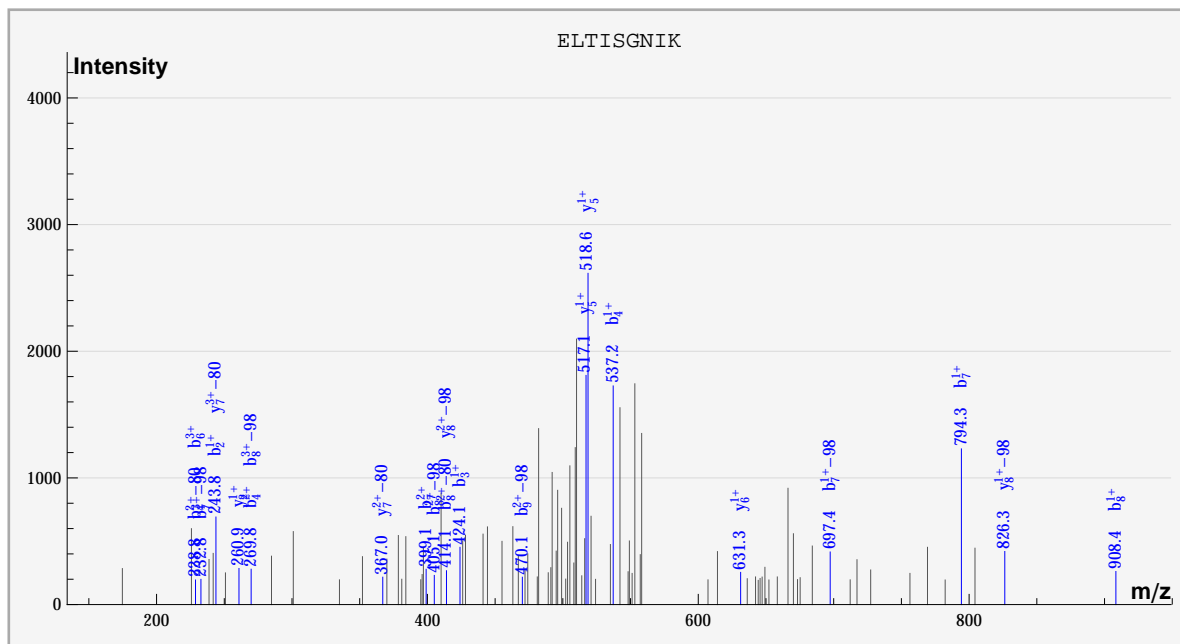

|   | # | b | b* | # | y | y* | P | P* |
|---|---|---|----|---|---|----|---|----|
| E | 1 |   |    |   |   |    |   |    |
| L | 2 | ✓ |    | 8 |   | ✓  |   |    |
| T | 3 | ✓ |    | 7 |   | ✓  |   |    |
| I | 4 | ✓ | ✓  | 6 | ✓ |    |   |    |
| S | 5 |   |    | 5 | ✓ |    |   |    |
| G | 6 | ✓ |    | 4 |   |    |   |    |
| N | 7 | ✓ | ✓  | 3 |   |    |   |    |
| I | 8 | ✓ | ✓  | 2 | ✓ |    |   |    |
| K | 9 |   | ✓  | 1 |   |    |   |    |

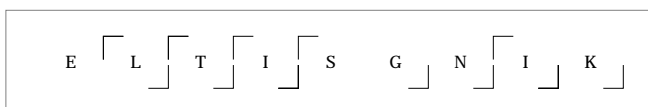

dbValid true ELTISGNIK PHOS(1) 2. 529. -1.23737 5.08353 100. ? 1890.  
 S\_Acido\_new%gi|68568021|gb|AAY80950.1| ELTISGNIK%:::PHOS:::sample\_3%compd\_614

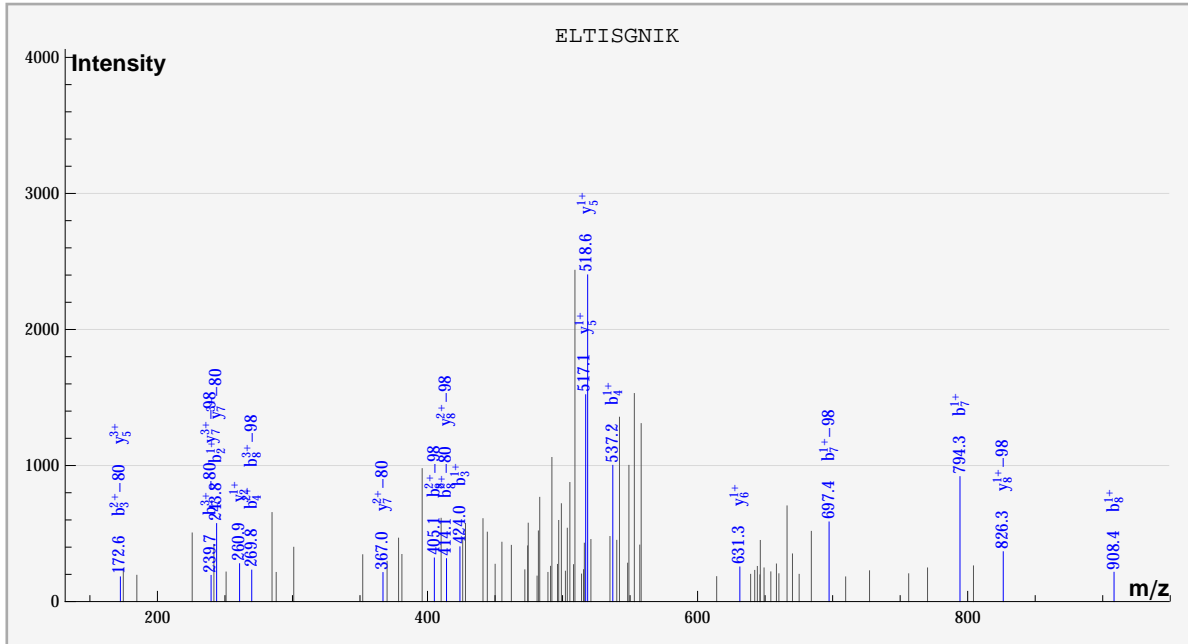

|   | # | b | b* | # | y | y* | P | P* |
|---|---|---|----|---|---|----|---|----|
| E | 1 |   |    |   |   |    |   |    |
| L | 2 | ✓ |    | 8 |   | ✓  |   |    |
| T | 3 | ✓ | ✓  | 7 |   | ✓  |   |    |
| I | 4 | ✓ |    | 6 | ✓ |    |   |    |
| S | 5 |   |    | 5 | ✓ |    |   |    |
| G | 6 |   |    | 4 |   |    |   |    |
| N | 7 | ✓ | ✓  | 3 |   |    |   |    |
| I | 8 | ✓ | ✓  | 2 | ✓ |    |   |    |
| K | 9 |   |    | 1 |   |    |   |    |

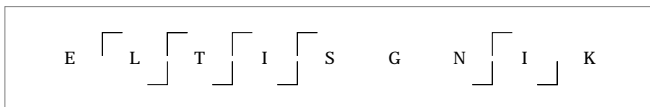

dbValid true ELTISGNIK PHOS(1) 2. 529. -1.23737 5.19426 100. ? 1902.  
 S\_Acido\_new%gi|68568021|gb|AAY80950.1| ELTISGNIK%:::PHOS:::sample\_3%compd\_625

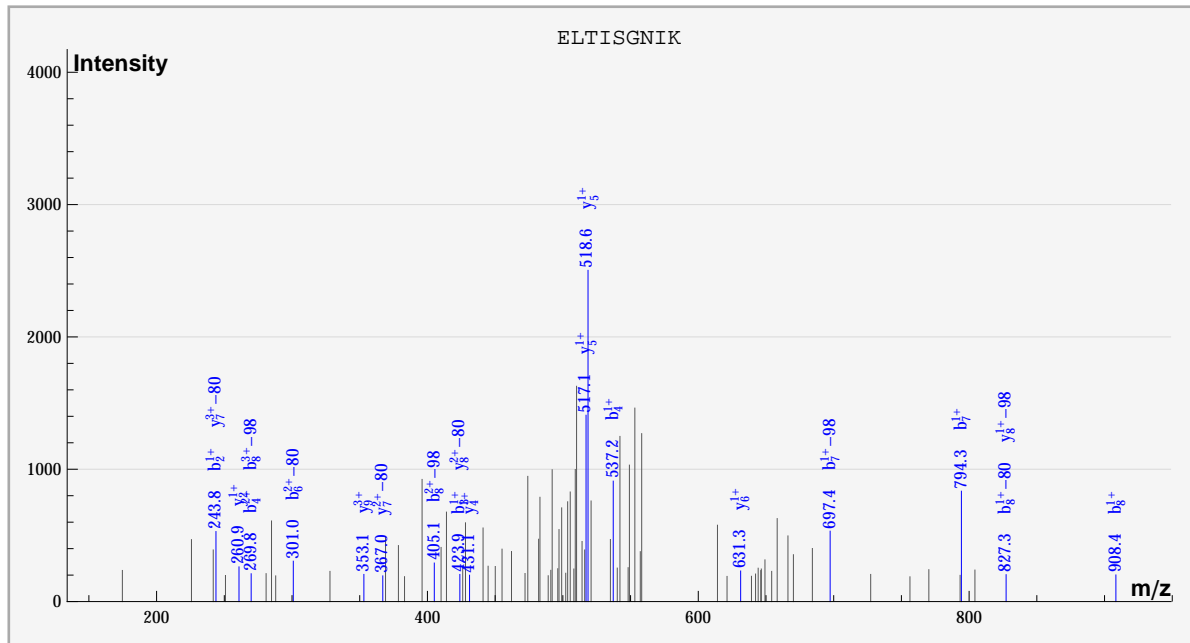

|   | # | b | b* | # | y | y* | P | P* |
|---|---|---|----|---|---|----|---|----|
| E | 1 |   |    |   |   |    |   | ✓  |
| L | 2 | ✓ |    | 8 |   | ✓  |   |    |
| T | 3 | ✓ |    | 7 |   | ✓  |   |    |
| I | 4 | ✓ |    | 6 | ✓ |    |   |    |
| S | 5 |   |    | 5 | ✓ |    |   |    |
| G | 6 |   | ✓  | 4 | ✓ |    |   |    |
| N | 7 | ✓ | ✓  | 3 |   |    |   |    |
| I | 8 | ✓ | ✓  | 2 | ✓ |    |   |    |
| K | 9 |   |    | 1 |   |    |   |    |

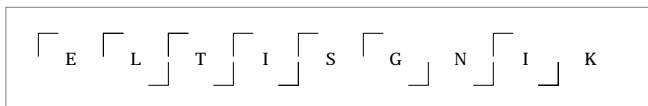

dbValid true ELTISGNIK PHOS(1) 2. 529. -1.23737 5.04014 100. ? 1926.

S\_Acido\_new%gi|68568021|gb|AAY80950.1| ELTISGNIK%:::PHOS:::sample\_3%compd\_647

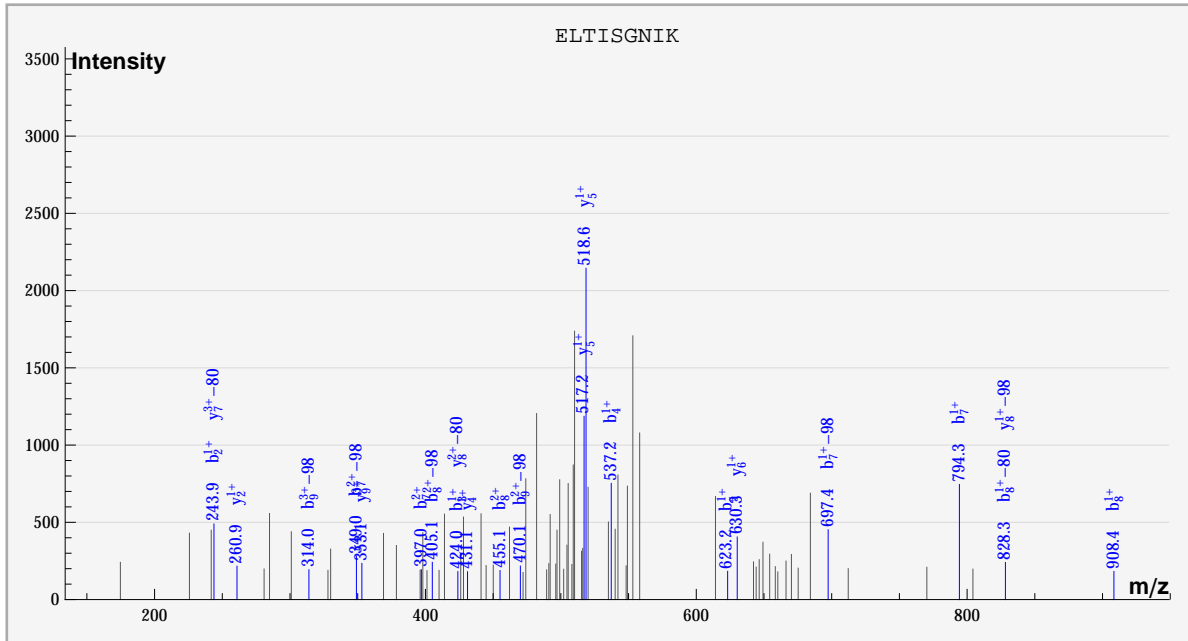

|   | # | b | b* | # | y | y* | P | P* |
|---|---|---|----|---|---|----|---|----|
| E | 1 |   |    |   |   |    |   | ✓  |
| L | 2 | ✓ |    | 8 |   | ✓  |   |    |
| T | 3 | ✓ |    | 7 |   | ✓  |   |    |
| I | 4 | ✓ |    | 6 | ✓ |    |   |    |
| S | 5 | ✓ |    | 5 | ✓ |    |   |    |
| G | 6 |   |    | 4 | ✓ |    |   |    |
| N | 7 | ✓ | ✓  | 3 |   |    |   |    |
| I | 8 | ✓ | ✓  | 2 | ✓ |    |   |    |
| K | 9 |   | ✓  | 1 |   |    |   |    |

ELTISGNIK

dbValid true ELTISGNIK PHOS(1) 2. 529. -1.23737 4.95986 100. ? 1938.

S\_Acido\_new%gi|68568021|gb|AAY80950.1| ELTISGNIK%:::PHOS:::sample\_3%compd\_658

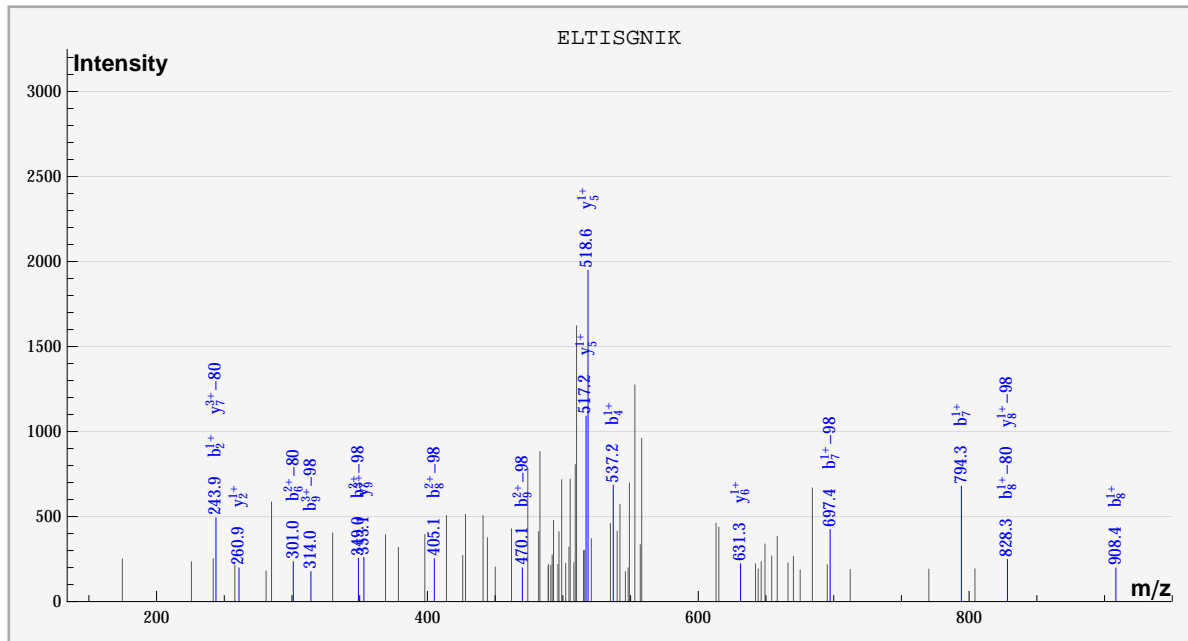

|   | # | b | b* | # | y | y* | P | P* |
|---|---|---|----|---|---|----|---|----|
| E | 1 |   |    |   |   |    |   | ✓  |
| L | 2 | ✓ |    | 8 |   | ✓  |   |    |
| T | 3 |   |    | 7 |   | ✓  |   |    |
| I | 4 | ✓ |    | 6 | ✓ |    |   |    |
| S | 5 |   |    | 5 |   | ✓  |   |    |
| G | 6 |   | ✓  | 4 |   |    |   |    |
| N | 7 | ✓ | ✓  | 3 |   |    |   |    |
| I | 8 | ✓ | ✓  | 2 | ✓ |    |   |    |
| K | 9 |   | ✓  | 1 |   |    |   |    |

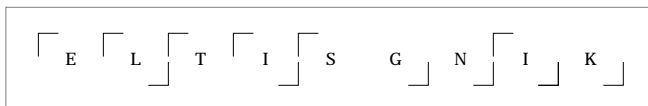



dbValid true RVELSTIR PHOS(1) 2. 529. -1.72376 5.51364 100. ? 2112.  
 S\_Acido\_new%gi|68567745|gb|AAY80674.1| RVELSTIR%:::::PHOS:::sample\_3%compd\_815

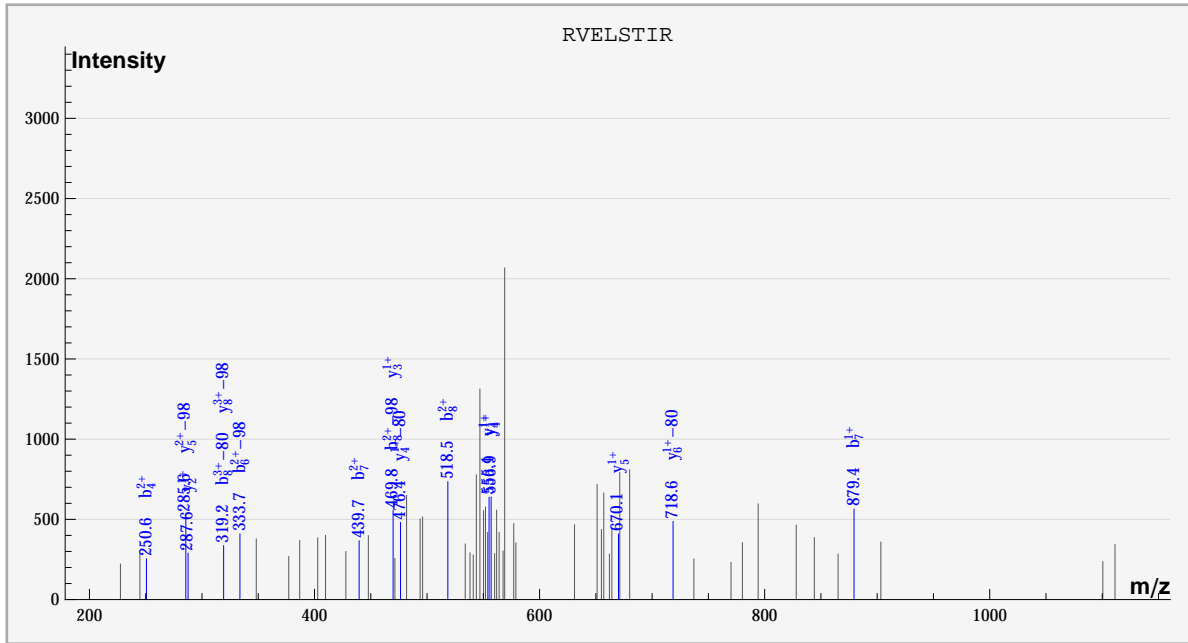

|   | # | b | b* | # | y | y* | P | P* |
|---|---|---|----|---|---|----|---|----|
| R | 1 |   |    |   |   |    |   | ✓  |
| V | 2 |   |    | 7 |   |    |   |    |
| E | 3 |   |    | 6 |   | ✓  |   |    |
| L | 4 | ✓ |    | 5 | ✓ | ✓  |   |    |
| S | 5 |   |    | 4 | ✓ | ✓  |   |    |
| T | 6 |   | ✓  | 3 | ✓ |    |   |    |
| I | 7 | ✓ |    | 2 | ✓ |    |   |    |
| R | 8 | ✓ | ✓  | 1 |   |    |   |    |

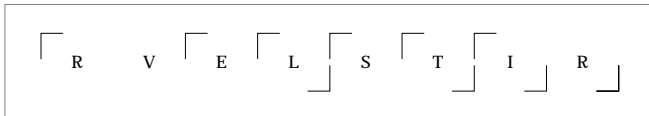

dbValid true YFSGEPFK PHOS(1) 2. 529. -1.28231 4.95349 100. ? 2136.  
 S\_Acido\_new%gi|68567511|gb|AAY80440.1| YFSGEPFK%:PHOS:::sample\_0%compd\_803

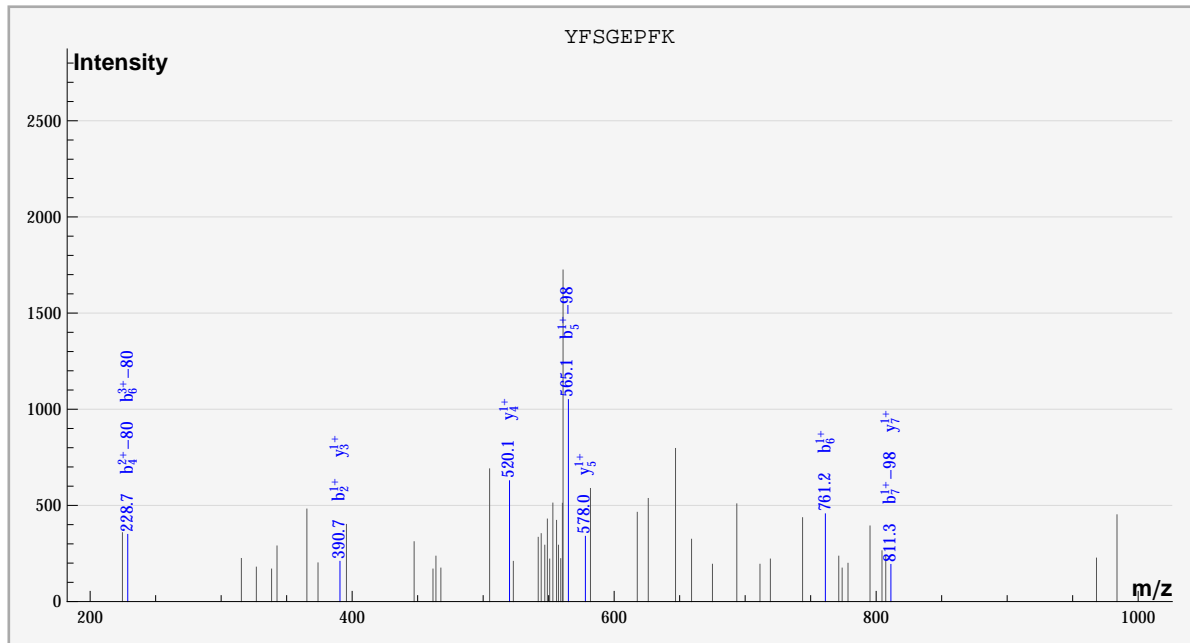

|   | # | b | b* | # | y | y* | P | P* |
|---|---|---|----|---|---|----|---|----|
| Y | 1 |   |    |   |   |    |   |    |
| F | 2 | ✓ |    | 7 | ✓ |    |   |    |
| S | 3 |   |    | 6 |   |    |   |    |
| G | 4 |   | ✓  | 5 | ✓ |    |   |    |
| E | 5 |   | ✓  | 4 | ✓ |    |   |    |
| P | 6 | ✓ | ✓  | 3 | ✓ |    |   |    |
| F | 7 |   | ✓  | 2 |   |    |   |    |
| K | 8 |   |    | 1 |   |    |   |    |

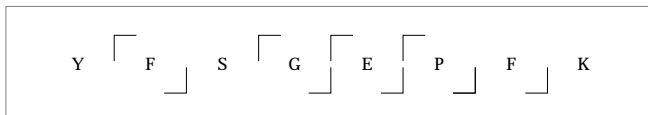

dbValid true RVELSTIR PHOS(1) 2. 529. -1.72376 5.29362 100. ? 2328.  
 S\_Acido\_new%gi|68567745|gb|AAY80674.1| RVELSTIR%::::PHOS::::%sample\_3%compd\_1014

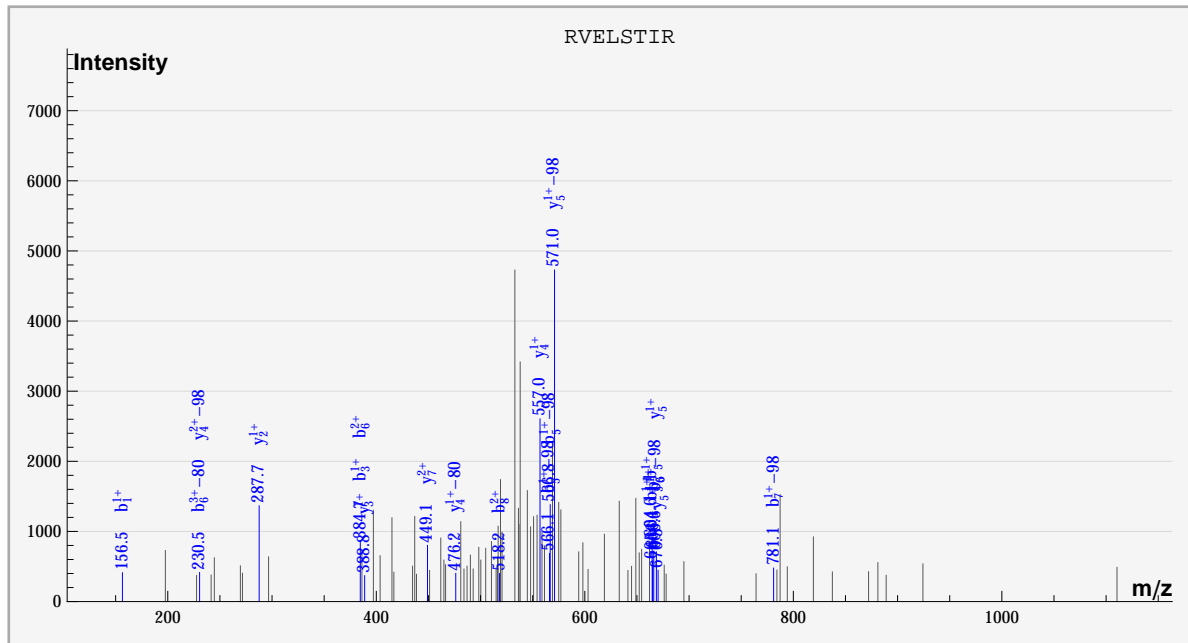

|   | # | b | b* | # | y | y* | P | P* |
|---|---|---|----|---|---|----|---|----|
| R | 1 | ✓ |    |   |   |    |   |    |
| V | 2 |   |    | 7 | ✓ |    |   |    |
| E | 3 | ✓ |    | 6 |   |    |   |    |
| L | 4 |   |    | 5 | ✓ | ✓  |   |    |
| S | 5 | ✓ | ✓  | 4 | ✓ | ✓  |   |    |
| T | 6 | ✓ | ✓  | 3 | ✓ |    |   |    |
| I | 7 |   | ✓  | 2 | ✓ |    |   |    |
| R | 8 | ✓ |    | 1 |   |    |   |    |

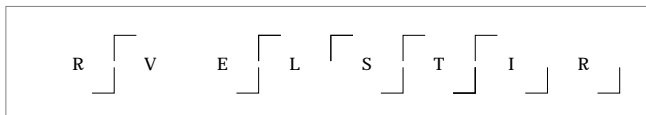

dbValid true RVELSTIR PHOS(1) 2. 529. -1.72376 4.94863 100. ? 2814.  
 S\_Acido\_new%gi|68567745|gb|AAY80674.1| RVELSTIR%:::::PHOS:::sample\_3%compd\_1458

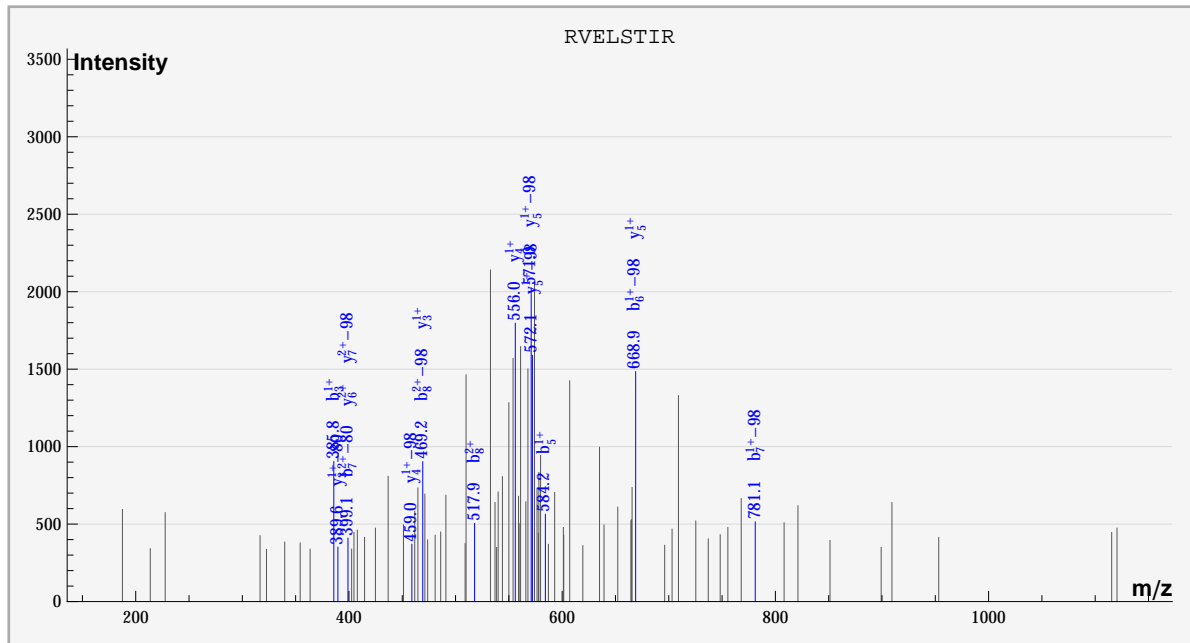

|   | # | b | b* | # | y | y* | P | P* |
|---|---|---|----|---|---|----|---|----|
| R | 1 |   |    |   |   |    |   |    |
| V | 2 |   |    | 7 |   | ✓  |   |    |
| E | 3 | ✓ |    | 6 | ✓ |    |   |    |
| L | 4 |   |    | 5 | ✓ | ✓  |   |    |
| S | 5 | ✓ |    | 4 | ✓ | ✓  |   |    |
| T | 6 |   | ✓  | 3 | ✓ | ✓  |   |    |
| I | 7 |   | ✓  | 2 |   |    |   |    |
| R | 8 | ✓ | ✓  | 1 |   |    |   |    |

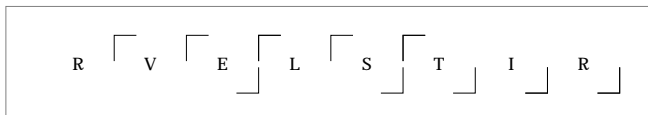

dbValid true YSMVSTK PHOS(3) 2. 529. -0.848518 5.0857 100. ? 2952.

S\_Acido\_new%gi|68568081|gb|AAy81010.1| YSMVSTK%:PHOS:PHOS:::PHOS::%sample\_3%compd\_1545

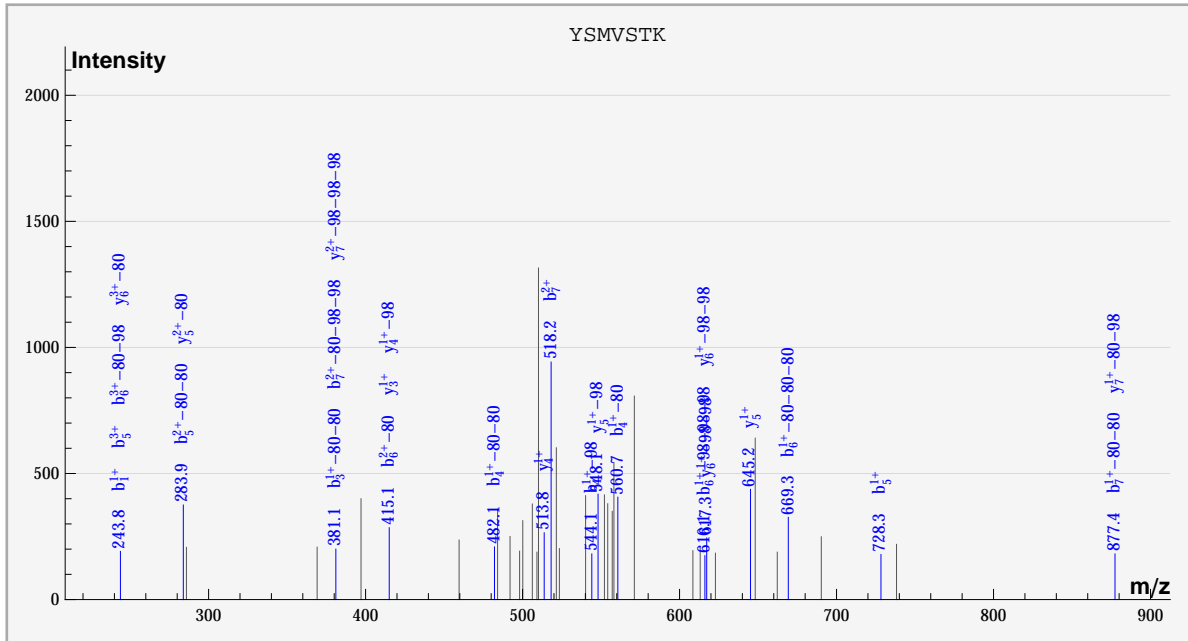

|   | # | b | b* | # | y | y* | P | P* |
|---|---|---|----|---|---|----|---|----|
| Y | 1 | ✓ |    |   |   |    |   | ✓  |
| S | 2 |   |    | 6 |   | ✓  |   |    |
| M | 3 |   | ✓  | 5 | ✓ | ✓  |   |    |
| V | 4 |   | ✓  | 4 | ✓ | ✓  |   |    |
| S | 5 | ✓ | ✓  | 3 | ✓ |    |   |    |
| T | 6 |   | ✓  | 2 |   |    |   |    |
| K | 7 | ✓ | ✓  | 1 |   |    |   |    |

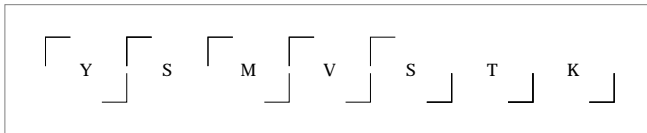

dbValid true KIASISLR PHOS(1) 2. 529. -1.21356 5.12056 100. ? 3042.  
 S\_Acido\_new%gi|68568359|gb|AA81288.1| KIASISLR%:::PHOS:::%sample\_3%compd\_1668

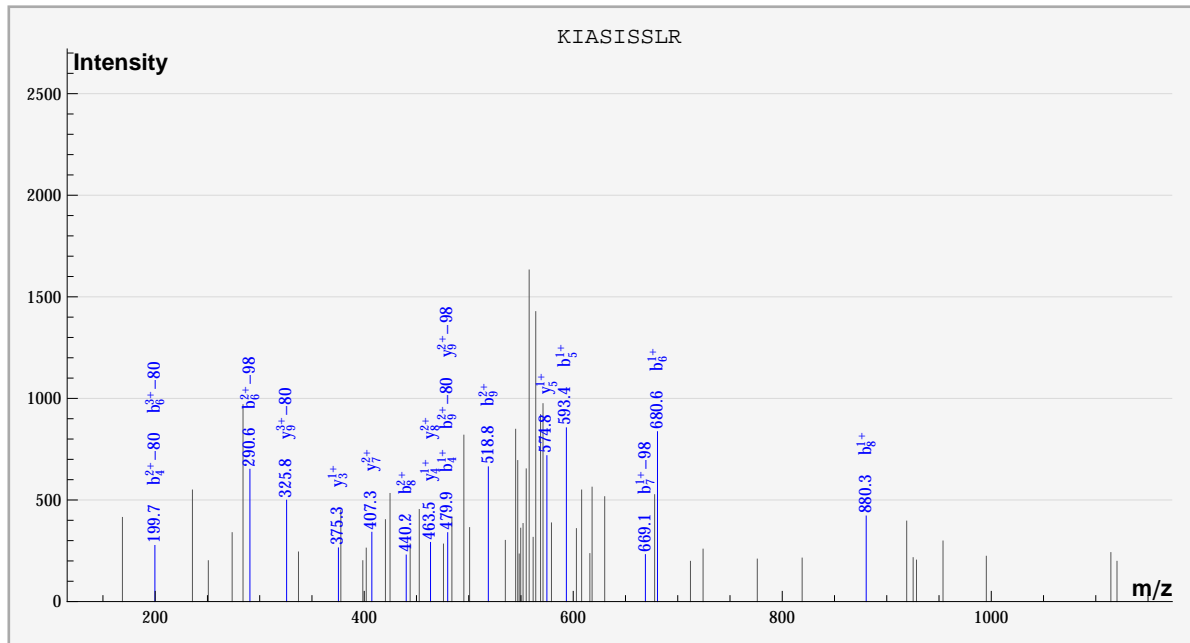

|   | # | b | b* | # | y | y* | P | P* |
|---|---|---|----|---|---|----|---|----|
| K | 1 |   |    |   |   |    |   | ✓  |
| I | 2 |   |    | 8 | ✓ |    |   |    |
| A | 3 |   |    | 7 | ✓ |    |   |    |
| S | 4 | ✓ | ✓  | 6 |   |    |   |    |
| I | 5 | ✓ |    | 5 | ✓ |    |   |    |
| S | 6 | ✓ | ✓  | 4 | ✓ |    |   |    |
| S | 7 |   | ✓  | 3 | ✓ |    |   |    |
| L | 8 | ✓ |    | 2 |   |    |   |    |
| R | 9 | ✓ | ✓  | 1 |   |    |   |    |

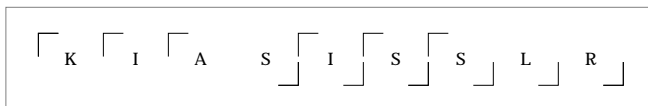

dbValid true ELTISGNIK PHOS(1) 2. 529. -1.23737 4.95398 100. ? 4014.  
 S\_Acido\_new%gil68568021|gb|AAY80950.1| ELTISGNIK%:::PHOS:::sample\_3%compd\_2432

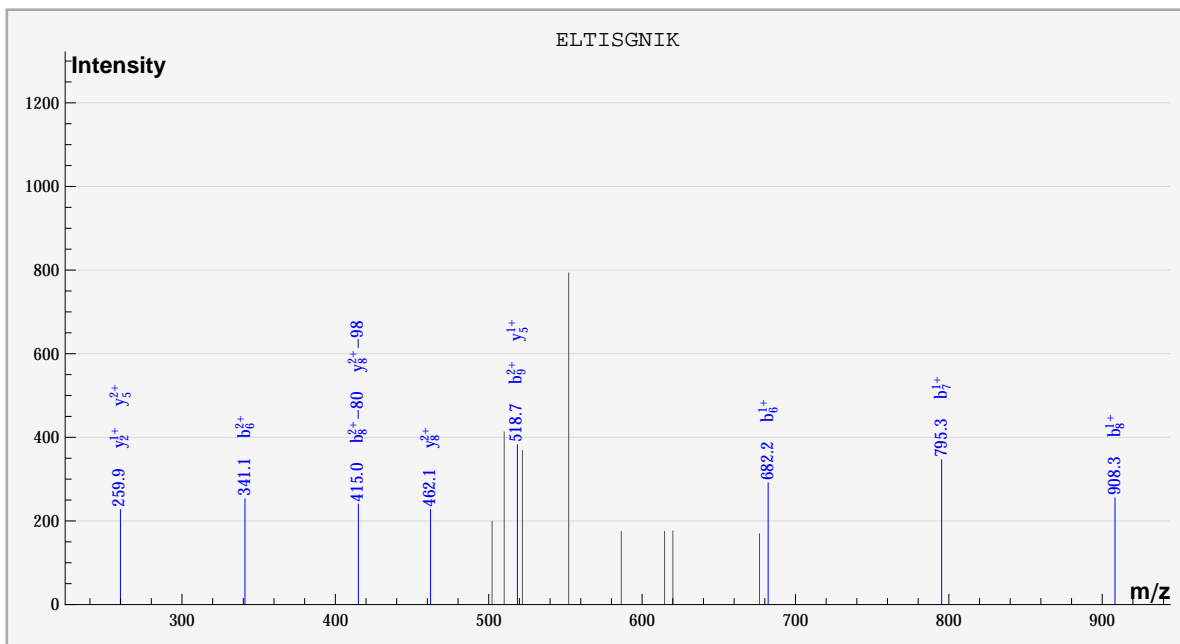

|   | # | b | b* | # | y | y* | P | P* |
|---|---|---|----|---|---|----|---|----|
| E | 1 |   |    |   |   |    |   |    |
| L | 2 |   |    | 8 | ✓ | ✓  |   |    |
| T | 3 |   |    | 7 |   |    |   |    |
| I | 4 |   |    | 6 |   |    |   |    |
| S | 5 |   |    | 5 | ✓ |    |   |    |
| G | 6 | ✓ |    | 4 |   |    |   |    |
| N | 7 | ✓ |    | 3 |   |    |   |    |
| I | 8 | ✓ | ✓  | 2 | ✓ |    |   |    |
| K | 9 | ✓ |    | 1 |   |    |   |    |

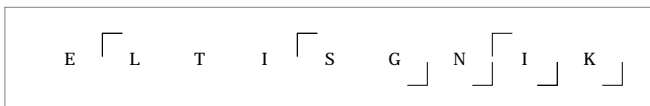

dbValid true YIGKPLKR PHOS(1) 2. 529. -1.20593 5.34476 100. ? 4476.  
 S\_Acido\_new%gi|68568482|gb|AAY81411.1| YIGKPLKR%:PHOS:::sample\_3%cmpd\_2980

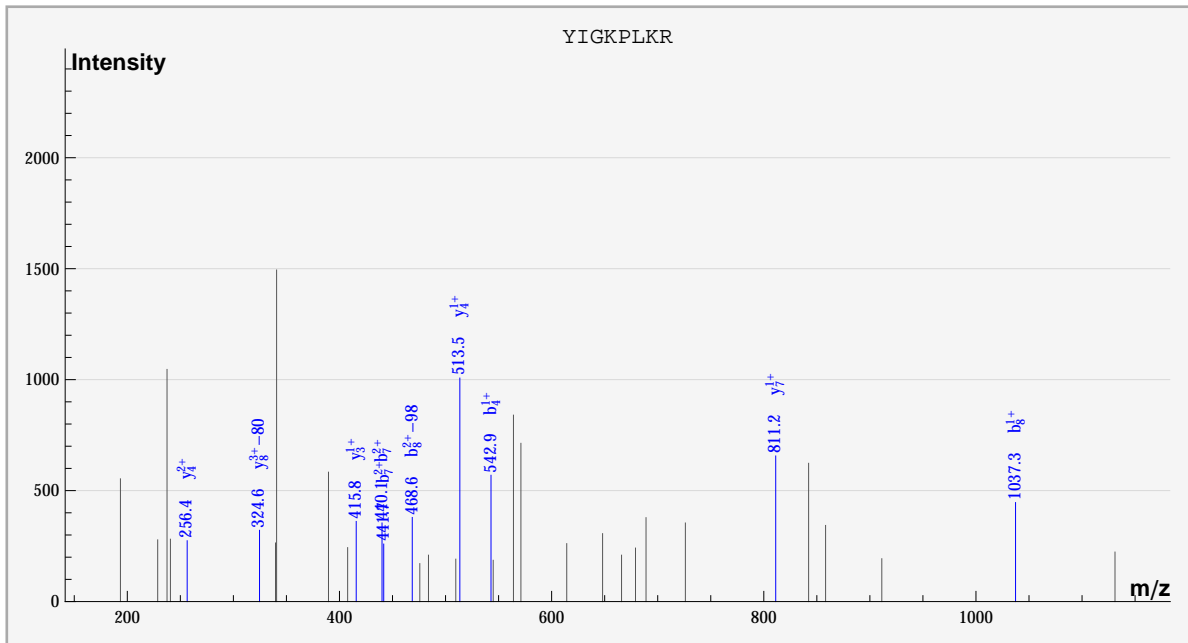

|   | # | b | b* | # | y | y* | P | P* |
|---|---|---|----|---|---|----|---|----|
| Y | 1 |   |    |   |   |    |   | ✓  |
| I | 2 |   |    | 7 | ✓ |    |   |    |
| G | 3 |   |    | 6 |   |    |   |    |
| K | 4 | ✓ |    | 5 |   |    |   |    |
| P | 5 |   |    | 4 | ✓ |    |   |    |
| L | 6 |   |    | 3 | ✓ |    |   |    |
| K | 7 | ✓ |    | 2 |   |    |   |    |
| R | 8 | ✓ | ✓  | 1 |   |    |   |    |

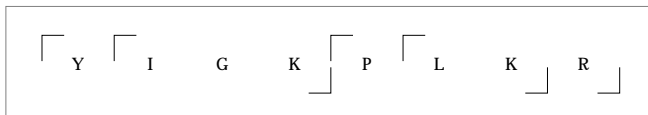



dbValid true KVEIEKTK PHOS(1) 2. 529. -1.21918 5.10766 100. ? 4632.  
 S\_Acido\_new%gi|68567083|gb|AAY80012.1| KVEIEKTK%::::::PHOS::%sample\_3%cmpd\_3123

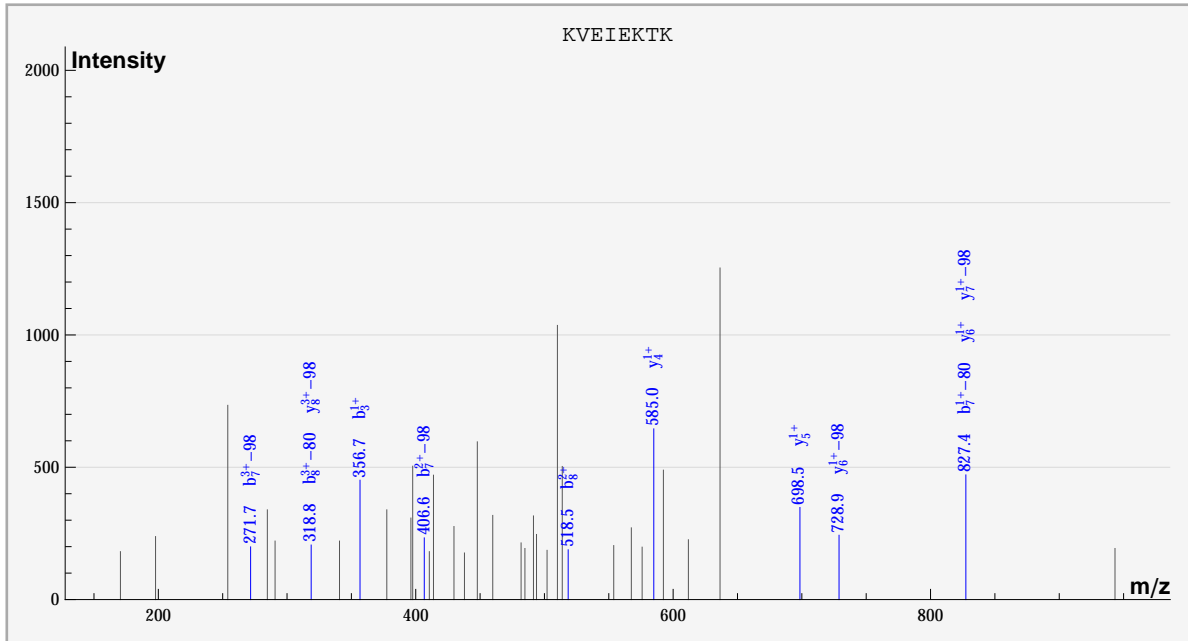

|   | # | b | b* | # | y | y* | P | P* |
|---|---|---|----|---|---|----|---|----|
| K | 1 |   |    |   |   |    |   | ✓  |
| V | 2 |   |    | 7 |   | ✓  |   |    |
| E | 3 | ✓ |    | 6 | ✓ | ✓  |   |    |
| I | 4 |   |    | 5 | ✓ |    |   |    |
| E | 5 |   |    | 4 | ✓ |    |   |    |
| K | 6 |   |    | 3 |   |    |   |    |
| T | 7 |   | ✓  | 2 |   |    |   |    |
| K | 8 | ✓ | ✓  | 1 |   |    |   |    |

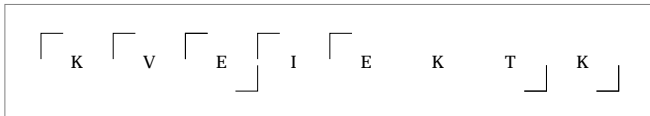

dbValid true YCVSYK Cys\_CAM(1),PHOS(3) 2. 530. 0.138372 5.33239 100. ? 2184.  
 S\_Acido\_new%gil68567890|gb|AAy80819.1| YCVSYK%:PHOS:Cys\_CAM::PHOS:PHOS::%sample\_3%cmpd\_838

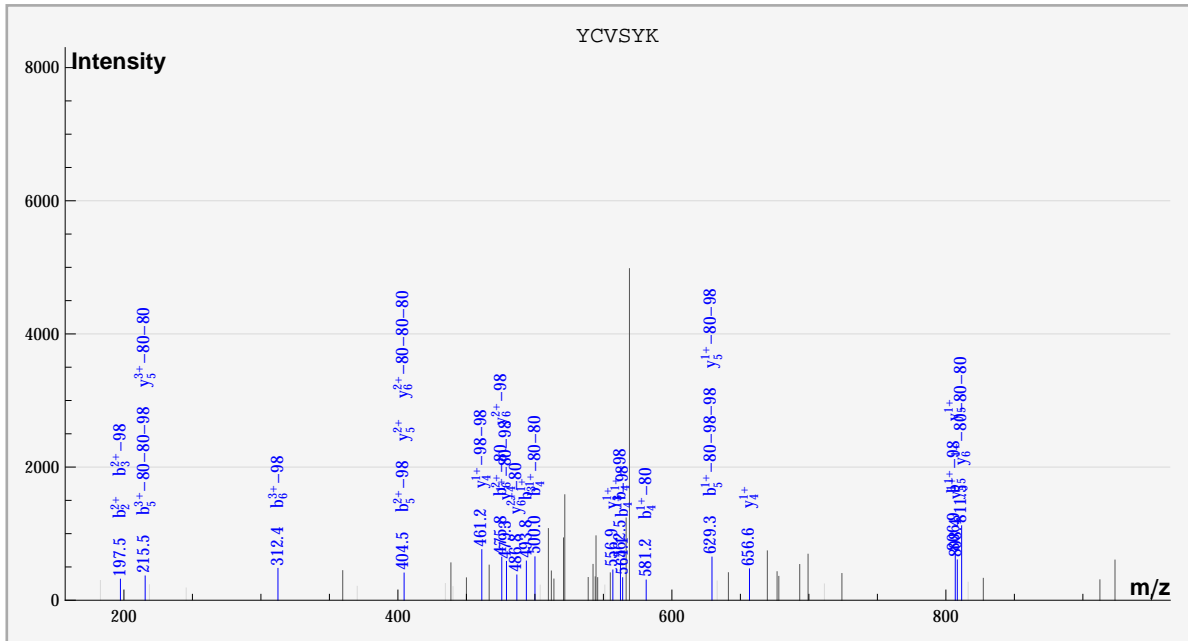

|   | # | b | b* | # | y | y* | P | P* |
|---|---|---|----|---|---|----|---|----|
| Y | 1 |   |    |   |   |    |   | ✓  |
| C | 2 | ✓ |    | 5 | ✓ | ✓  |   |    |
| V | 3 | ✓ | ✓  | 4 | ✓ | ✓  |   |    |
| S | 4 |   | ✓  | 3 | ✓ |    |   |    |
| Y | 5 |   | ✓  | 2 |   |    |   |    |
| K | 6 |   | ✓  | 1 |   |    |   |    |

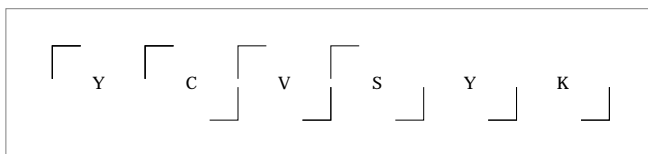

dbValid true DEYSLISR PHOS(1) 2. 531. 0.728792 5.60021 100. ? 1704.

S\_Acido\_new%gi|68568021|gb|AAY80950.1| DEYSLISR%:::PHOS:::sample\_3%compd\_425

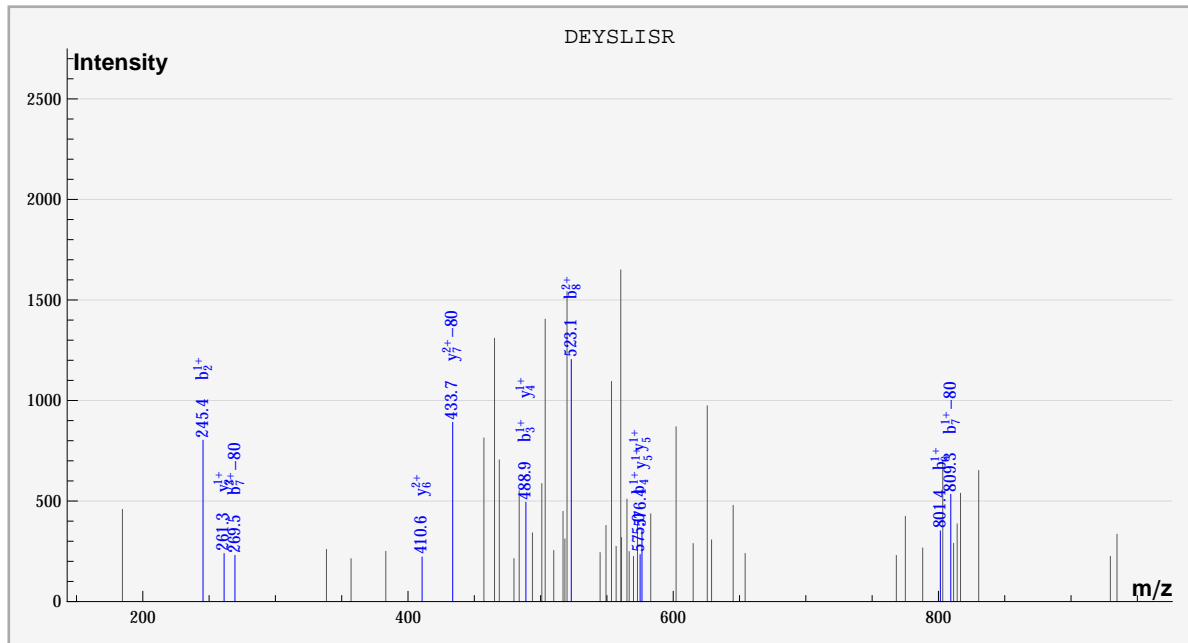

|   | # | b | b* | # | y | y* | P | P* |
|---|---|---|----|---|---|----|---|----|
| D | 1 |   |    |   |   |    |   |    |
| E | 2 | ✓ |    | 7 |   | ✓  |   |    |
| Y | 3 | ✓ |    | 6 | ✓ |    |   |    |
| S | 4 | ✓ |    | 5 | ✓ |    |   |    |
| L | 5 |   |    | 4 | ✓ |    |   |    |
| I | 6 | ✓ |    | 3 |   |    |   |    |
| S | 7 |   | ✓  | 2 | ✓ |    |   |    |
| R | 8 | ✓ |    | 1 |   |    |   |    |

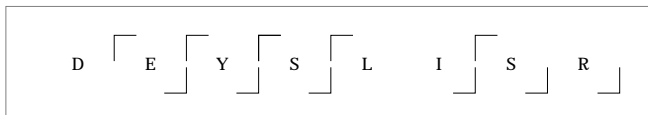

dbValid true LRYGDLK PHOS(1) 2. 531. -1.72429 4.95359 100. ? 1896.  
 S\_Acido\_new%gi68568355|gb|AAY81284.1| LRYGDLK%:::PHOS:::sample\_0%cmpd\_601

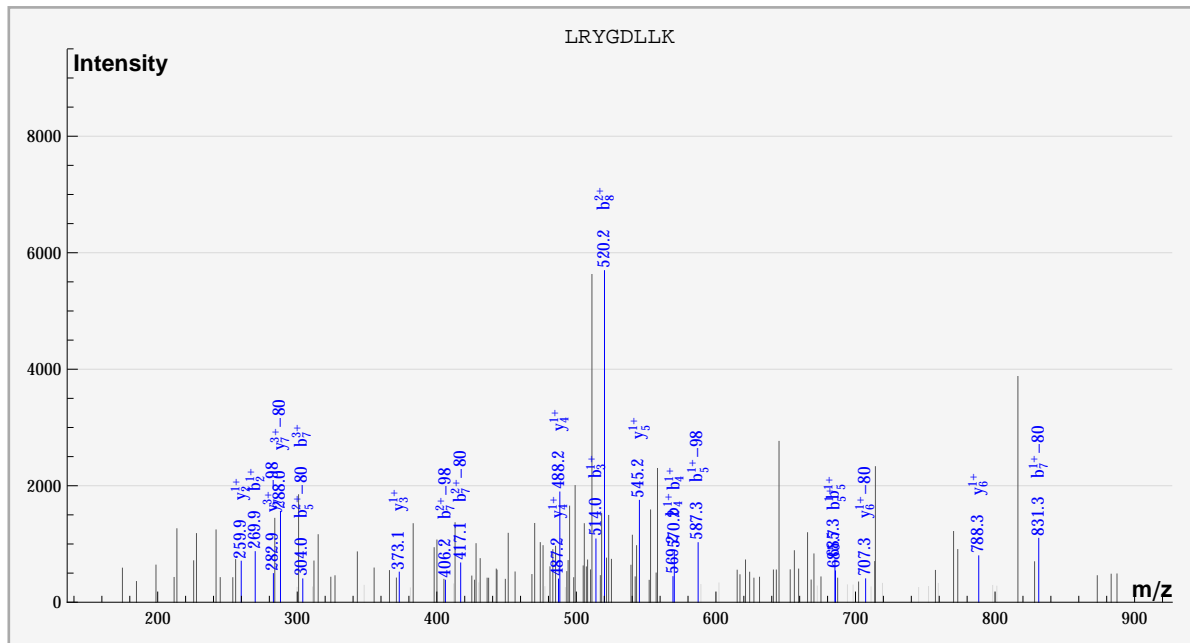

|   | # | b | b* | # | y | y* | P | P* |
|---|---|---|----|---|---|----|---|----|
| L | 1 |   |    |   |   |    |   |    |
| R | 2 | ✓ |    | 7 |   | ✓  |   |    |
| Y | 3 | ✓ |    | 6 | ✓ | ✓  |   |    |
| G | 4 | ✓ |    | 5 | ✓ |    |   |    |
| D | 5 | ✓ | ✓  | 4 | ✓ |    |   |    |
| L | 6 |   |    | 3 | ✓ |    |   |    |
| L | 7 | ✓ | ✓  | 2 | ✓ |    |   |    |
| K | 8 | ✓ |    | 1 |   |    |   |    |

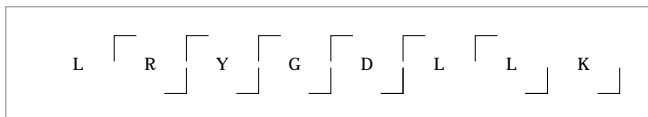

dbValid true YEKFIKR PHOS(1) 2. 531. 1.27043 5.11646 100. ? 2724.

S\_Acido\_new%gi|68566711|gb|AAY79640.1| YEKFIKR%:PHOS::::::%sample\_0%compd\_1332

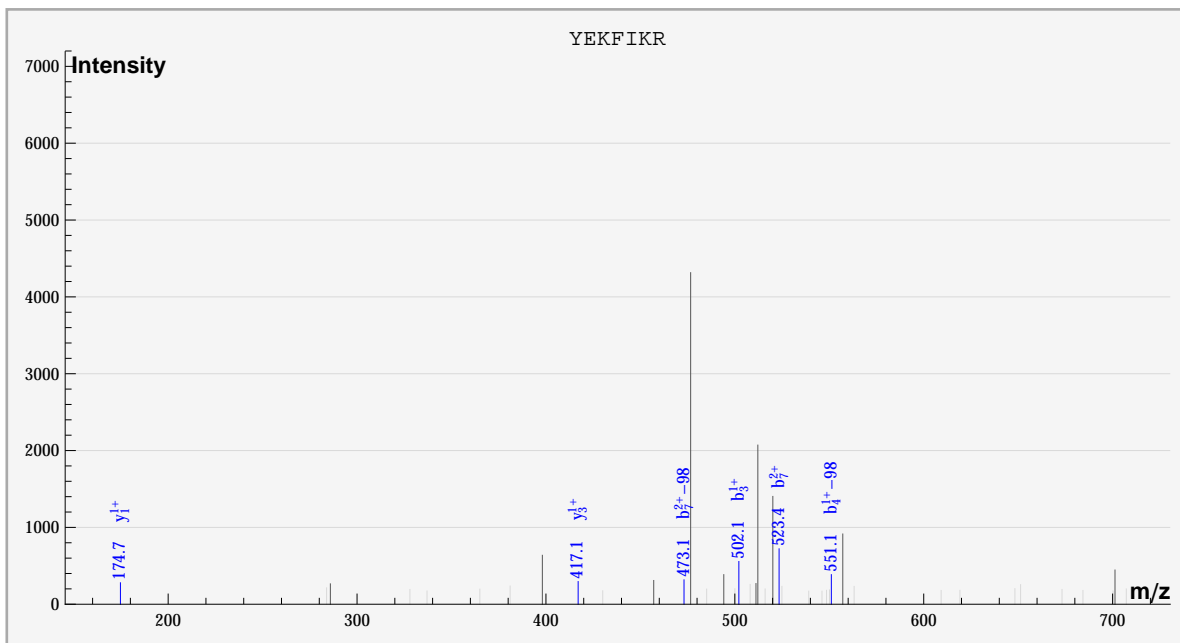

|   | # | b | b* | # | y | y* | P | P* |
|---|---|---|----|---|---|----|---|----|
| Y | 1 |   |    |   |   |    |   |    |
| E | 2 |   |    | 6 |   |    |   |    |
| K | 3 | ✓ |    | 5 |   |    |   |    |
| F | 4 |   | ✓  | 4 |   |    |   |    |
| I | 5 |   |    | 3 | ✓ |    |   |    |
| K | 6 |   |    | 2 |   |    |   |    |
| R | 7 | ✓ | ✓  | 1 | ✓ |    |   |    |

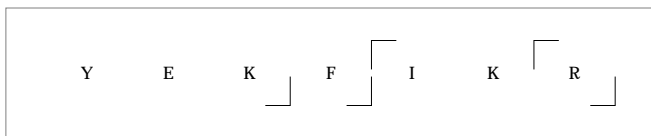

dbValid true YEKFIKR PHOS(1) 2. 531. 1.27043 5.0474 100. ? 2736.  
 S\_Acido\_new%gi|68566711|gb|AAY79640.1| YEKFIKR%:PHOS::::::%sample\_0%compd\_1343

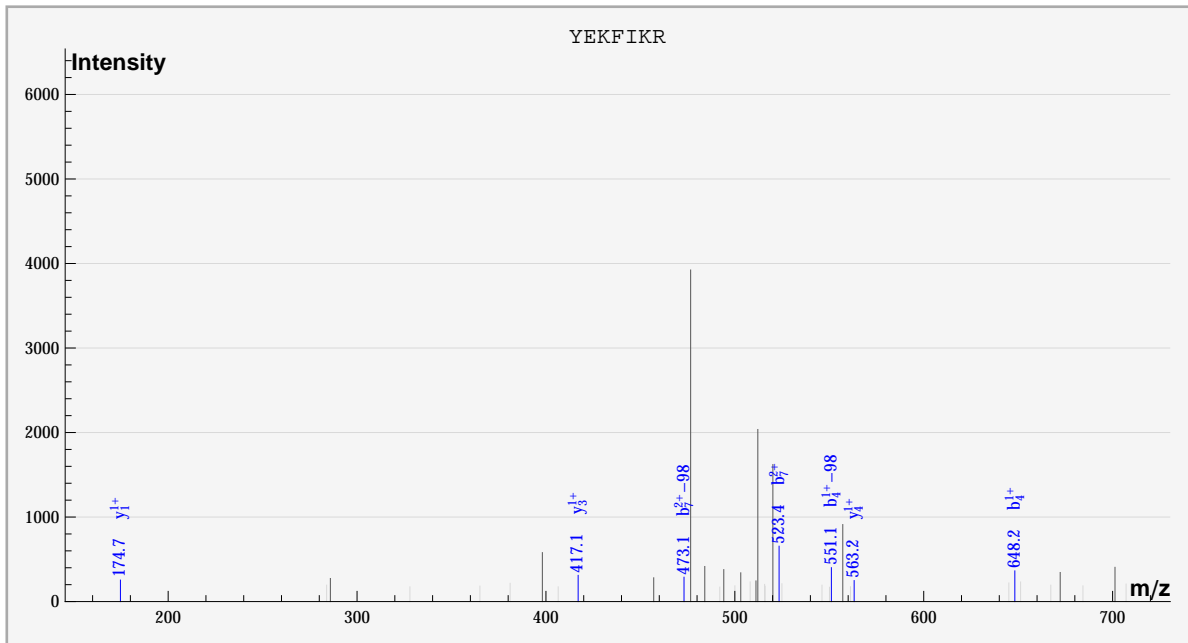

|   | # | b | b* | # | y | y* | P | P* |
|---|---|---|----|---|---|----|---|----|
| Y | 1 |   |    |   |   |    |   |    |
| E | 2 |   |    | 6 |   |    |   |    |
| K | 3 |   |    | 5 |   |    |   |    |
| F | 4 | ✓ | ✓  | 4 | ✓ |    |   |    |
| I | 5 |   |    | 3 | ✓ |    |   |    |
| K | 6 |   |    | 2 |   |    |   |    |
| R | 7 | ✓ | ✓  | 1 | ✓ |    |   |    |

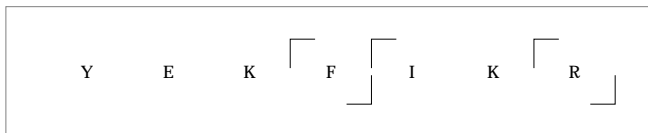

dbValid true YEKFIKR PHOS(1) 2. 531. 1.27043 5.13919 100. ? 2748.  
 S\_Acido\_new%gi|68566711|gb|AAY79640.1| YEKFIKR%:PHOS::::::%sample\_0%compd\_1353

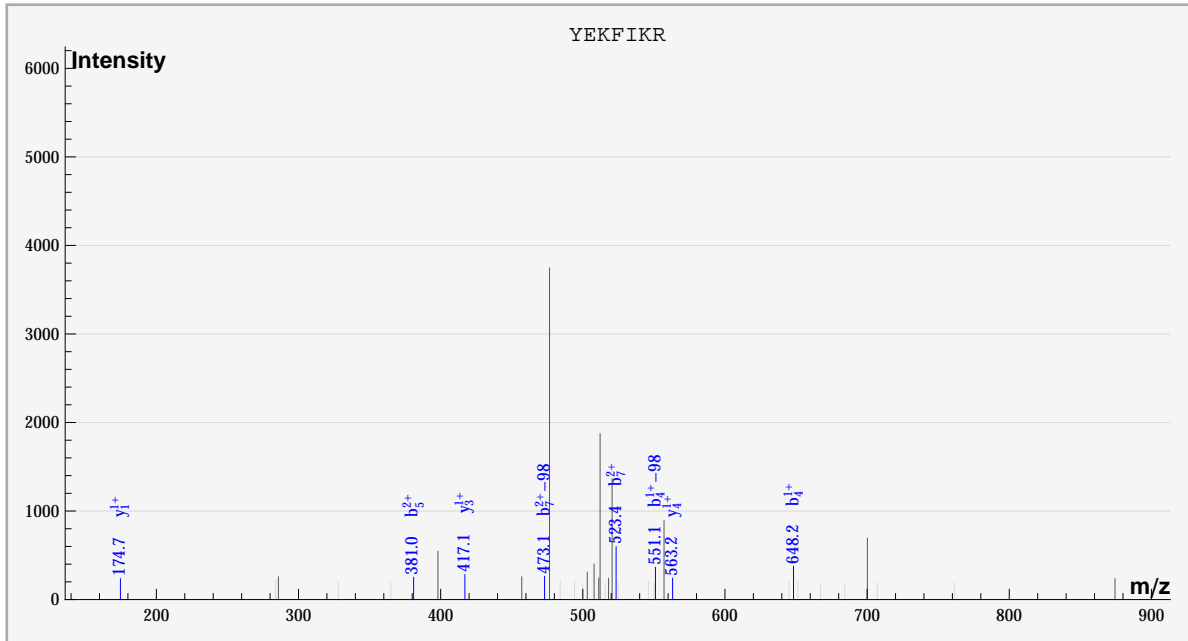

|   | # | b | b* | # | y | y* | P | P* |
|---|---|---|----|---|---|----|---|----|
| Y | 1 |   |    |   |   |    |   |    |
| E | 2 |   |    | 6 |   |    |   |    |
| K | 3 |   |    | 5 |   |    |   |    |
| F | 4 | ✓ | ✓  | 4 | ✓ |    |   |    |
| I | 5 | ✓ |    | 3 | ✓ |    |   |    |
| K | 6 |   |    | 2 |   |    |   |    |
| R | 7 | ✓ | ✓  | 1 | ✓ |    |   |    |

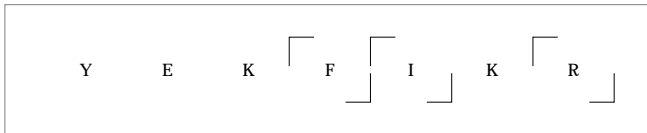

dbValid true RILLGGVTR PHOS(1) 2. 531. 1.80242 5.1065 100. ? 2988.  
 S\_Acido\_new%gi|68567575|gb|AA80504.1| RILLGGVTR%:::PHOS::%sample\_2%compd\_1612

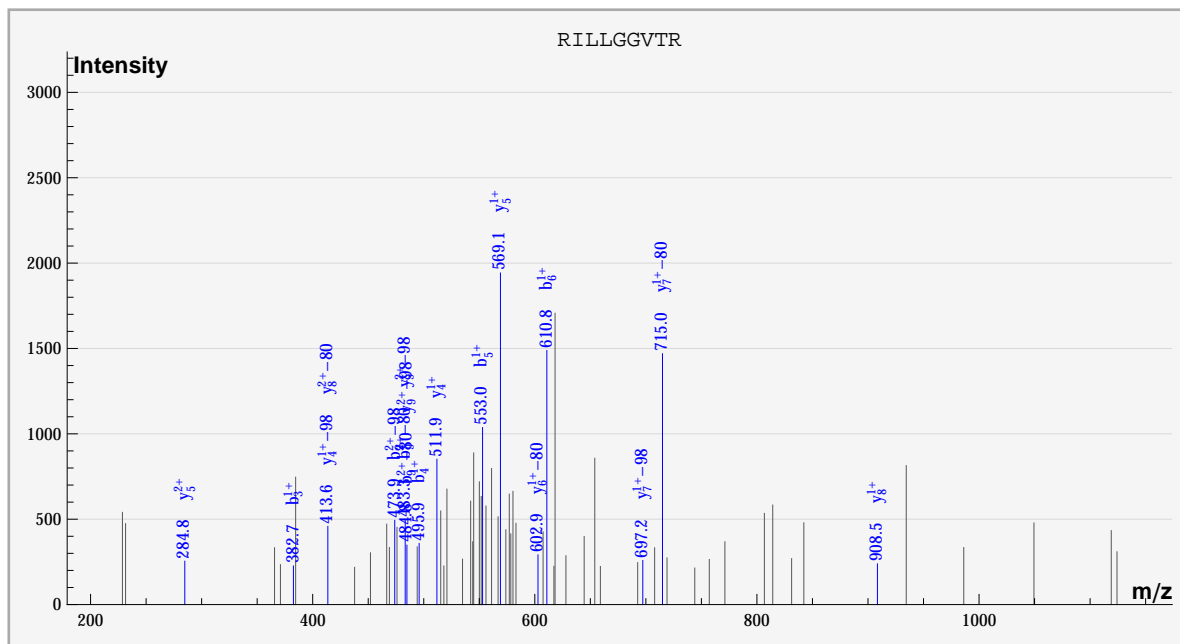

|   | # | b | b* | # | y | y* | P | P* |
|---|---|---|----|---|---|----|---|----|
| R | 1 |   |    |   |   |    |   | ✓  |
| I | 2 |   |    | 8 | ✓ | ✓  |   |    |
| L | 3 | ✓ |    | 7 |   | ✓  |   |    |
| L | 4 | ✓ |    | 6 |   | ✓  |   |    |
| G | 5 | ✓ |    | 5 | ✓ |    |   |    |
| G | 6 | ✓ |    | 4 | ✓ | ✓  |   |    |
| V | 7 |   |    | 3 |   |    |   |    |
| T | 8 |   |    | 2 |   |    |   |    |
| R | 9 |   | ✓  | 1 |   |    |   |    |

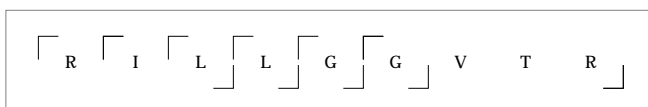



dbValid true EMDDNSVR Oxidation\_M(1),PHOS(1) 2. 531. 0.183887 4.918 100. ? 3204.  
 S\_Acido\_new%gil68566820|gb|AAY79749.1| EMDDNSVR%::Oxidation\_M:::PHOS:::sample\_2%compd\_1811

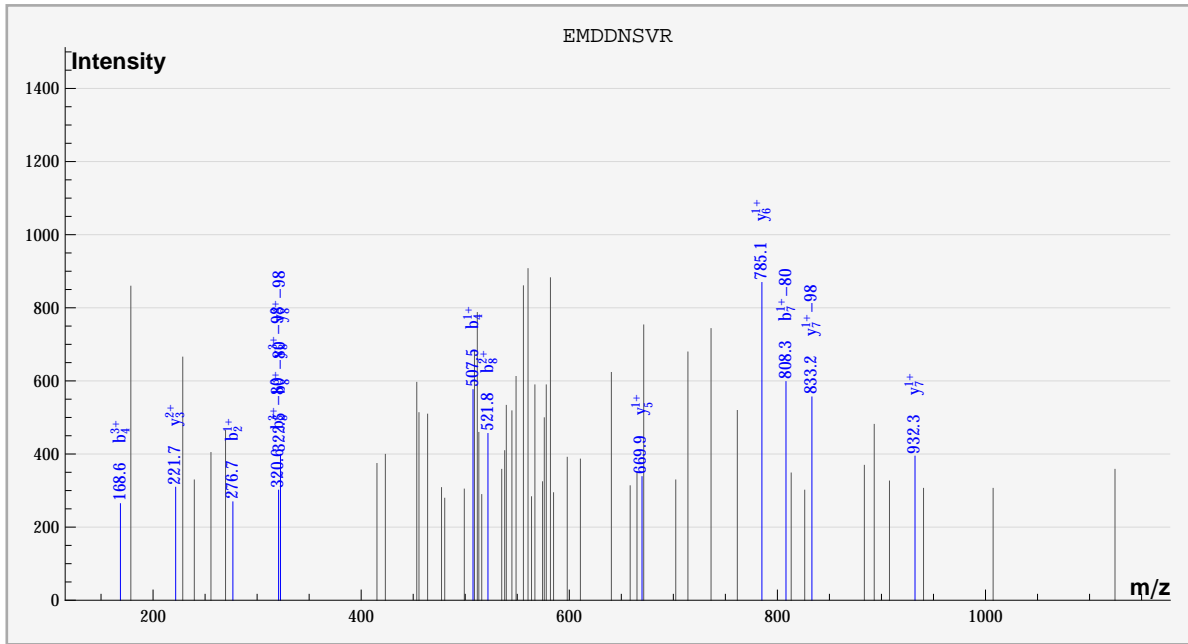

|   | # | b | b* | # | y | y* | P | P* |
|---|---|---|----|---|---|----|---|----|
| E | 1 |   |    |   |   |    |   | ✓  |
| M | 2 | ✓ |    | 7 | ✓ | ✓  |   |    |
| D | 3 |   |    | 6 | ✓ |    |   |    |
| D | 4 | ✓ |    | 5 | ✓ |    |   |    |
| N | 5 |   |    | 4 |   |    |   |    |
| S | 6 |   |    | 3 | ✓ |    |   |    |
| V | 7 |   | ✓  | 2 |   |    |   |    |
| R | 8 | ✓ | ✓  | 1 |   |    |   |    |

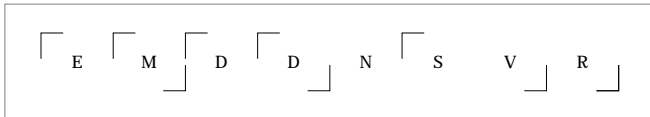

dbValid true YLGEYEK PHOS(2) 2. 532. -0.814973 4.94566 100. ? 1434.  
 S\_Acido\_new%gi|68567156|gb|AA80085.1| YLGEYEK%:PHOS:::PHOS:::%sample\_2%compd\_191

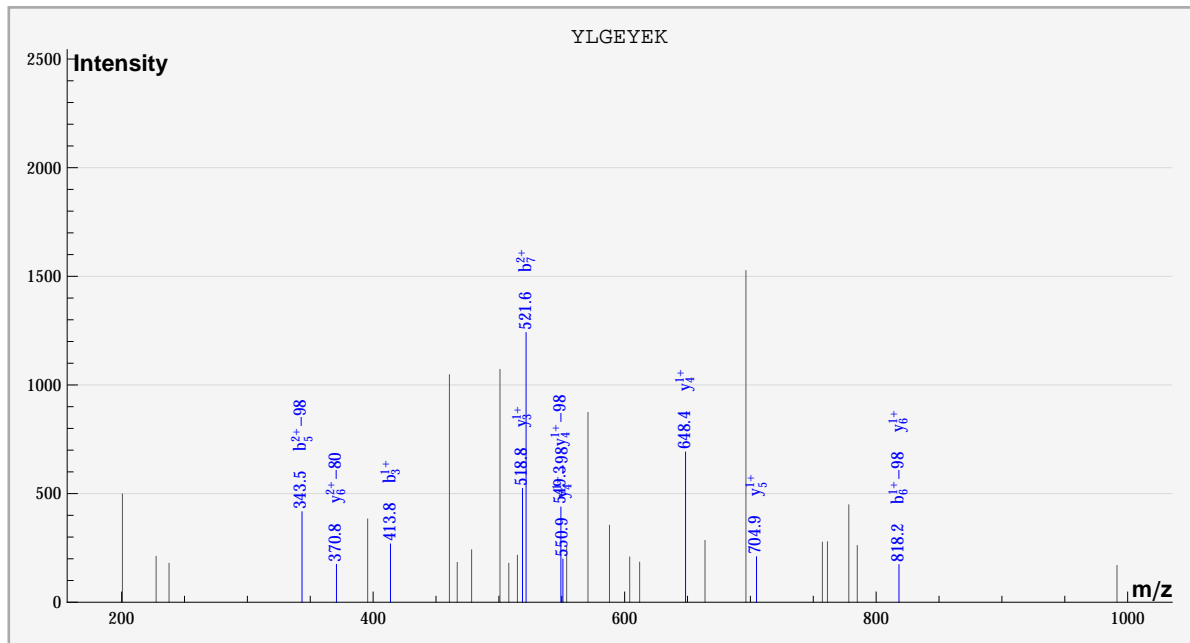

|   | # | b | b* | # | y | y* | P | P* |
|---|---|---|----|---|---|----|---|----|
| Y | 1 |   |    |   |   |    |   |    |
| L | 2 |   |    | 6 | ✓ | ✓  |   |    |
| G | 3 | ✓ |    | 5 | ✓ |    |   |    |
| E | 4 |   |    | 4 | ✓ | ✓  |   |    |
| Y | 5 |   | ✓  | 3 | ✓ |    |   |    |
| E | 6 |   | ✓  | 2 |   |    |   |    |
| K | 7 | ✓ |    | 1 |   |    |   |    |

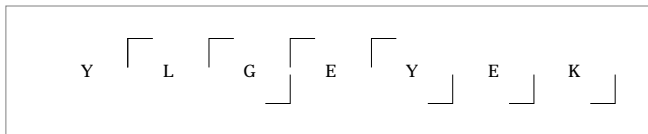

dbValid true KYIAYSR PHOS(2) 2. 532. -1.28317 5.07781 100. ? 1692.  
 S\_Acido\_new%gi|68567334|gb|AA80263.1| KYIAYSR%::PHOS:::PHOS::%sample\_2%compd\_420

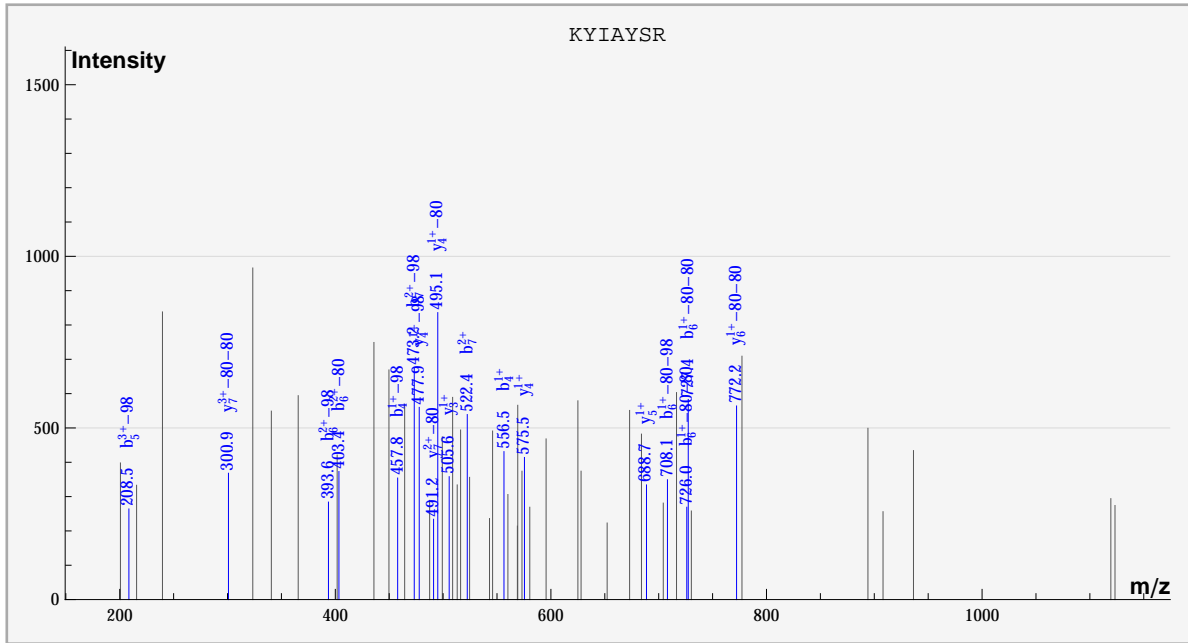

|   | # | b | b* | # | y | y* | P | P* |
|---|---|---|----|---|---|----|---|----|
| K | 1 |   |    |   |   |    |   | ✓  |
| Y | 2 |   |    | 6 |   | ✓  |   |    |
| I | 3 |   |    | 5 | ✓ |    |   |    |
| A | 4 | ✓ | ✓  | 4 | ✓ | ✓  |   |    |
| Y | 5 |   | ✓  | 3 | ✓ |    |   |    |
| S | 6 |   | ✓  | 2 |   |    |   |    |
| R | 7 | ✓ | ✓  | 1 |   |    |   |    |

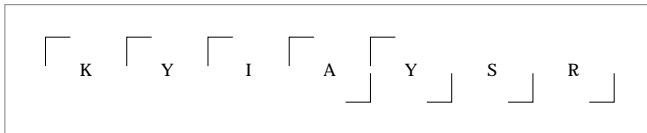

dbValid true RILGGVTR PHOS(1) 2. 532. 0.802422 5.10399 100. ? 2148.  
 S\_Acido\_new%gi|68567575|gb|AAY80504.1| RILGGVTR%:::PHOS::%sample\_2%compd\_840

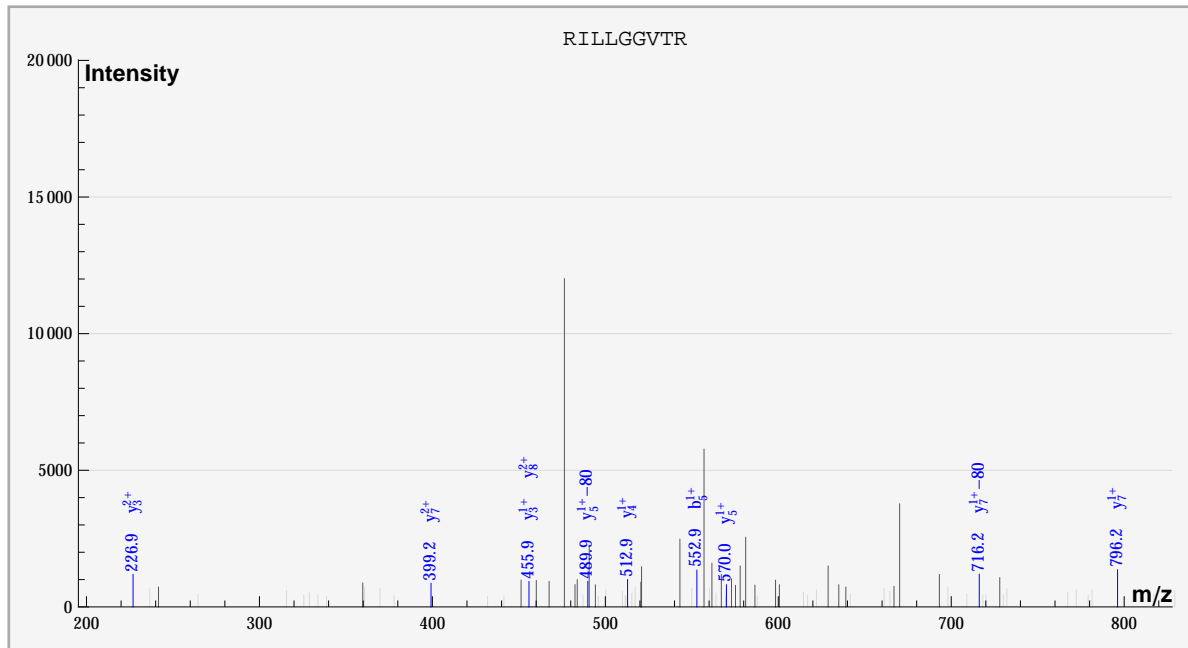

|   | # | b | b* | # | y | y* | P | P* |
|---|---|---|----|---|---|----|---|----|
| R | 1 |   |    |   |   |    |   |    |
| I | 2 |   |    | 8 | ✓ |    |   |    |
| L | 3 |   |    | 7 | ✓ | ✓  |   |    |
| L | 4 |   |    | 6 |   |    |   |    |
| G | 5 | ✓ |    | 5 | ✓ | ✓  |   |    |
| G | 6 |   |    | 4 | ✓ |    |   |    |
| V | 7 |   |    | 3 | ✓ |    |   |    |
| T | 8 |   |    | 2 |   |    |   |    |
| R | 9 |   |    | 1 |   |    |   |    |

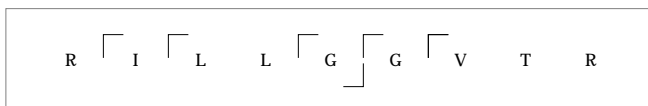

dbValid true RILLGGVTR PHOS(1) 2. 532. 0.802422 5.17635 100. ? 2544.  
 S\_Acido\_new%gi|68567575|gb|AAV80504.1| RILLGGVTR%:::::PHOS::%sample\_2%cmpd\_1204

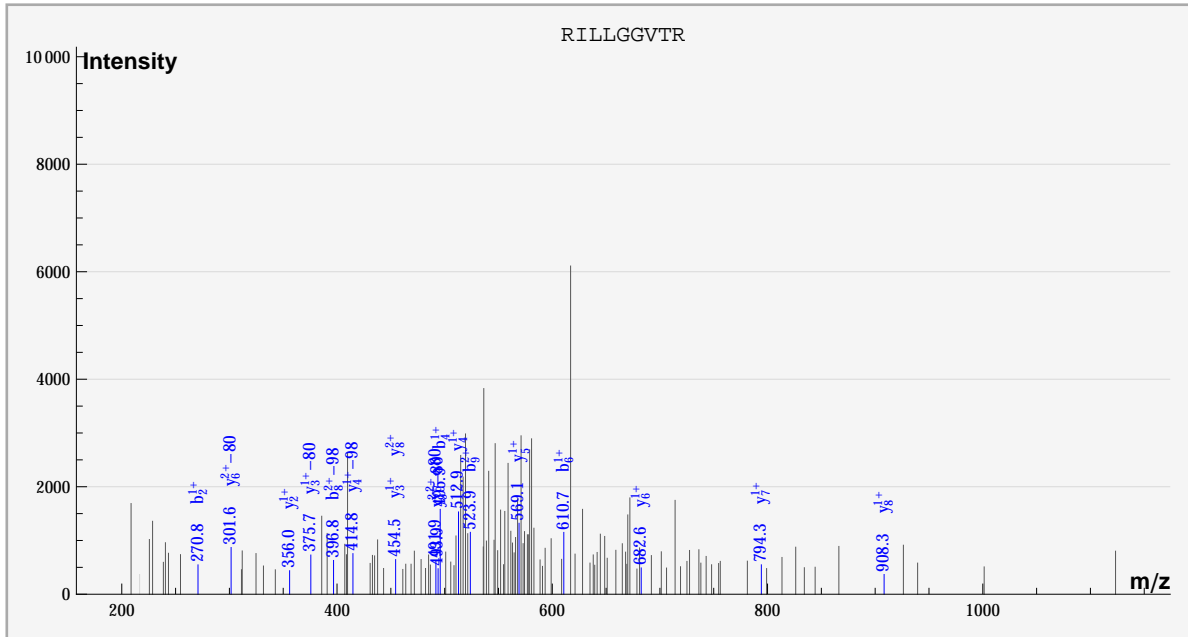

|   | # | b | b* | # | y | y* | P | P* |
|---|---|---|----|---|---|----|---|----|
| R | 1 |   |    |   |   |    |   | ✓  |
| I | 2 | ✓ |    | 8 | ✓ |    |   |    |
| L | 3 |   |    | 7 | ✓ |    |   |    |
| L | 4 | ✓ |    | 6 | ✓ | ✓  |   |    |
| G | 5 |   |    | 5 | ✓ |    |   |    |
| G | 6 | ✓ |    | 4 | ✓ | ✓  |   |    |
| V | 7 |   |    | 3 | ✓ | ✓  |   |    |
| T | 8 |   | ✓  | 2 | ✓ |    |   |    |
| R | 9 | ✓ |    | 1 |   |    |   |    |

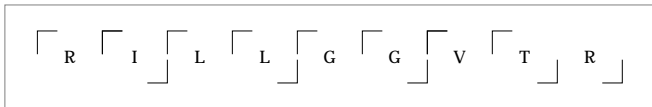

dbValid true TINLFSEER PHOS(1) 2. 532. -1.75285 5.00253 100. ? 3186.  
 S\_Acido\_new%gi|68567753|gb|AAY80682.1| TINLFSEER%:::PHOS:::sample\_2%compd\_1790

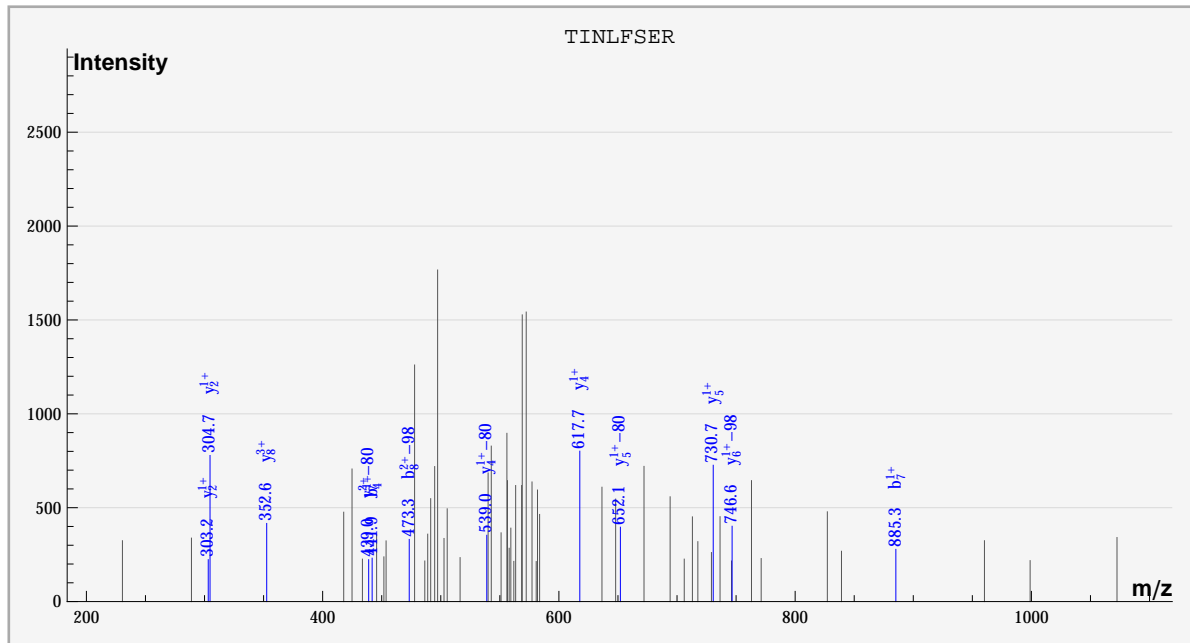

|   | # | b | b* | # | y | y* | P | P* |
|---|---|---|----|---|---|----|---|----|
| T | 1 |   |    |   |   |    |   | ✓  |
| I | 2 |   |    | 7 |   | ✓  |   |    |
| N | 3 |   |    | 6 |   | ✓  |   |    |
| L | 4 | ✓ |    | 5 | ✓ | ✓  |   |    |
| F | 5 |   |    | 4 | ✓ | ✓  |   |    |
| S | 6 |   |    | 3 |   |    |   |    |
| E | 7 | ✓ |    | 2 | ✓ |    |   |    |
| R | 8 |   | ✓  | 1 |   |    |   |    |

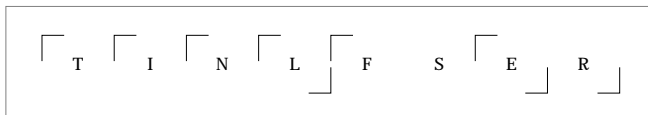

dbValid true LYWTVTAK PHOS(1) 2. 532. -0.743013 5.29602 100. ? 3714.  
 S\_Acido\_new%gi|68566818|gb|AAY79747.1| LYWTVTAK%::PHOS:::sample\_2%compd\_2278

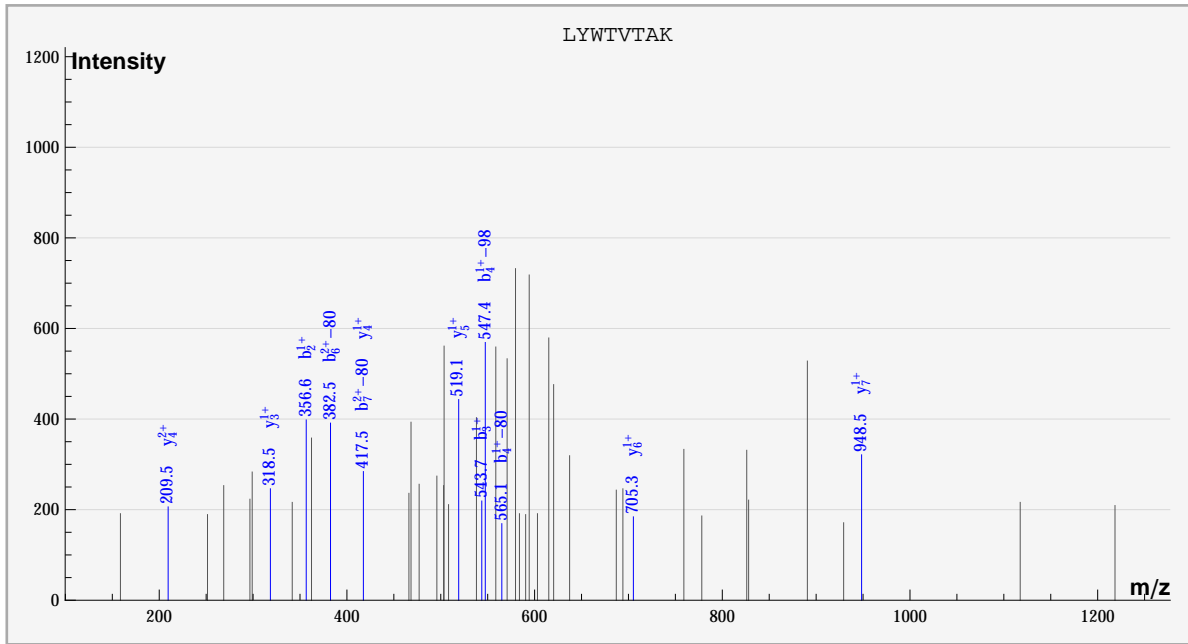

|   | # | b | b* | # | y | y* | P | P* |
|---|---|---|----|---|---|----|---|----|
| L | 1 |   |    |   |   |    |   |    |
| Y | 2 | ✓ |    | 7 | ✓ |    |   |    |
| W | 3 | ✓ |    | 6 | ✓ |    |   |    |
| T | 4 |   | ✓  | 5 | ✓ |    |   |    |
| V | 5 |   |    | 4 | ✓ |    |   |    |
| T | 6 |   | ✓  | 3 | ✓ |    |   |    |
| A | 7 |   | ✓  | 2 |   |    |   |    |
| K | 8 |   |    | 1 |   |    |   |    |

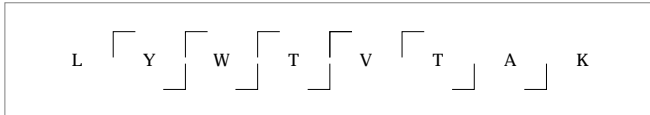

dbValid true KVLTLTVK PHOS(2) 2. 532. -0.726023 4.9064 100. ? 3834.  
 S\_Acido\_new%gi|68568073|gb|AAy81002.1| KVLTLTVK%::::PHOS::PHOS::%sample\_2%compd\_2388

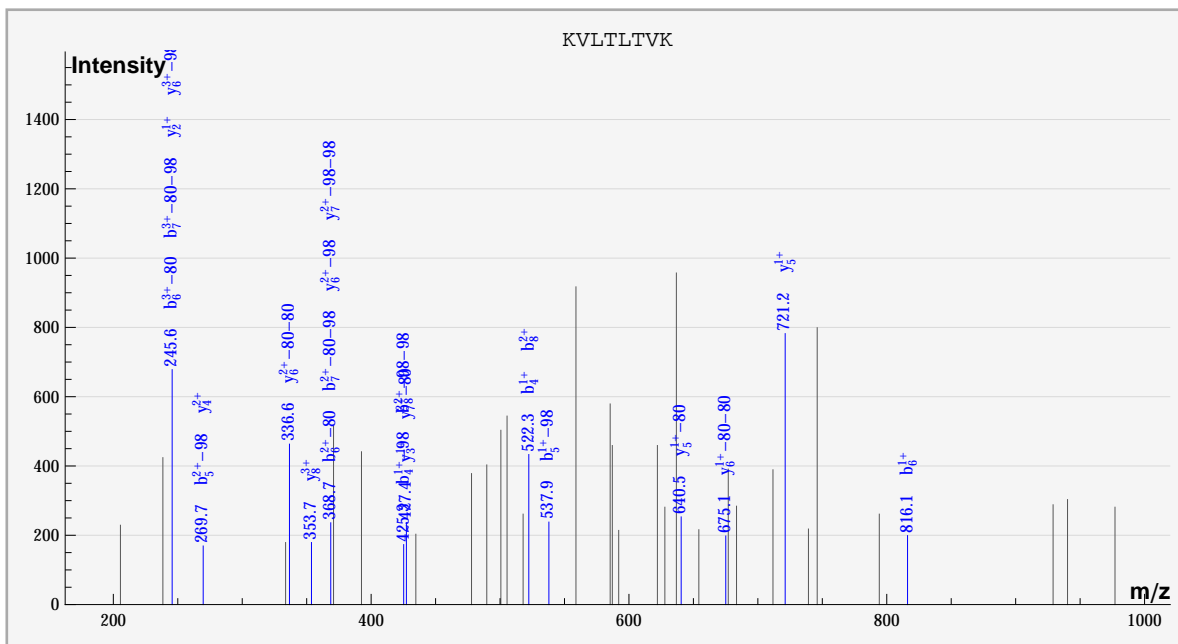

|   | # | b | b* | # | y | y* | P | P* |
|---|---|---|----|---|---|----|---|----|
| K | 1 |   |    |   |   |    |   | ✓  |
| V | 2 |   |    | 7 |   | ✓  |   |    |
| L | 3 |   |    | 6 |   | ✓  |   |    |
| T | 4 | ✓ | ✓  | 5 | ✓ | ✓  |   |    |
| L | 5 |   | ✓  | 4 | ✓ |    |   |    |
| T | 6 | ✓ | ✓  | 3 | ✓ |    |   |    |
| V | 7 |   | ✓  | 2 | ✓ |    |   |    |
| K | 8 | ✓ | ✓  | 1 |   |    |   |    |

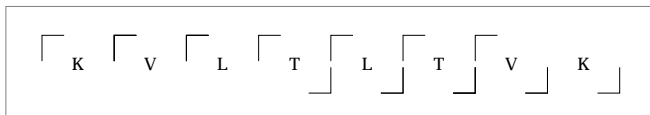



dbValid true QPSCGLSR Cys\_CAM(1),PHOS(2) 2. 532. 0.685207 5.11265 100. ? 4458.

S\_Acido\_new%gil68566669|gb|AA79598.1| QPSCGLSR%:::PHOS:Cys\_CAM:::PHOS::%sample\_2%compd\_2961

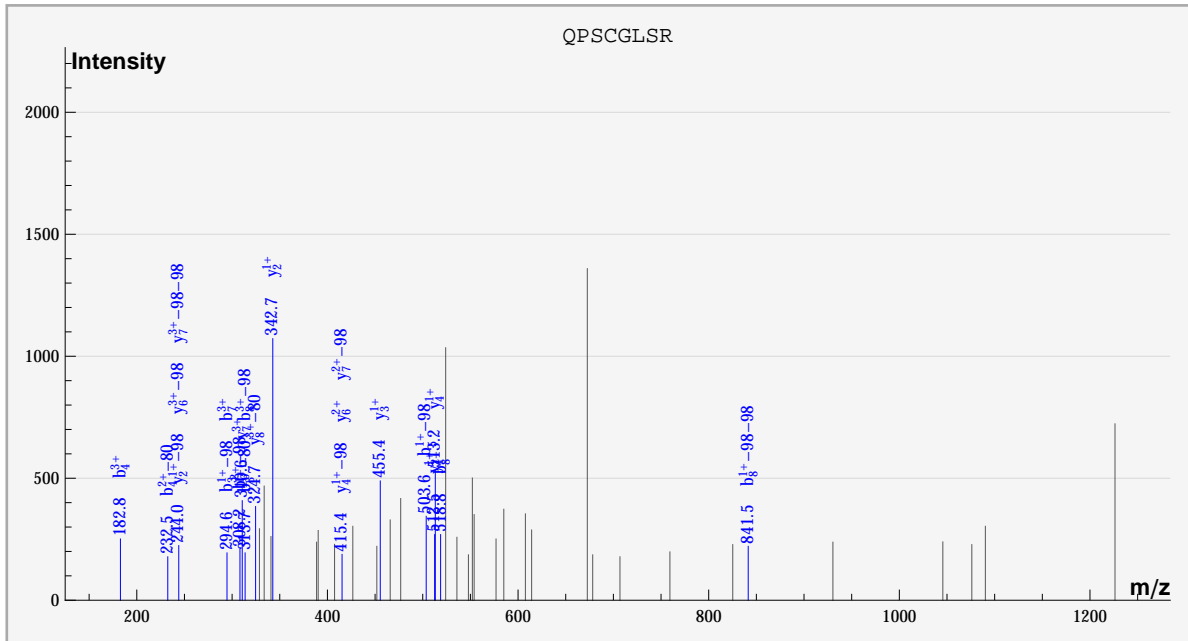

|   | # | b | b* | # | y | y* | P | P* |
|---|---|---|----|---|---|----|---|----|
| Q | 1 |   |    |   |   |    |   | ✓  |
| P | 2 |   |    | 7 | ✓ | ✓  |   |    |
| S | 3 |   | ✓  | 6 | ✓ | ✓  |   |    |
| C | 4 | ✓ | ✓  | 5 |   |    |   |    |
| G | 5 |   | ✓  | 4 | ✓ | ✓  |   |    |
| L | 6 |   | ✓  | 3 | ✓ |    |   |    |
| S | 7 | ✓ |    | 2 | ✓ | ✓  |   |    |
| R | 8 | ✓ | ✓  | 1 |   |    |   |    |

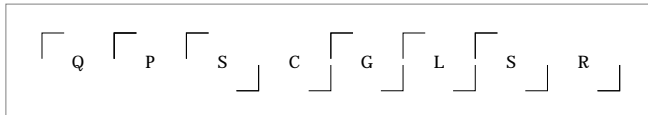

dbValid true DSMAEVTR PHOS(2) 2. 533. 1.67705 5.1394 100. ? 1536.  
 S\_Acido\_new%gi|68568312|gb|AAy81241.1| DSMAEVTR%::PHOS:::PHOS::%sample\_2%cmpd\_278

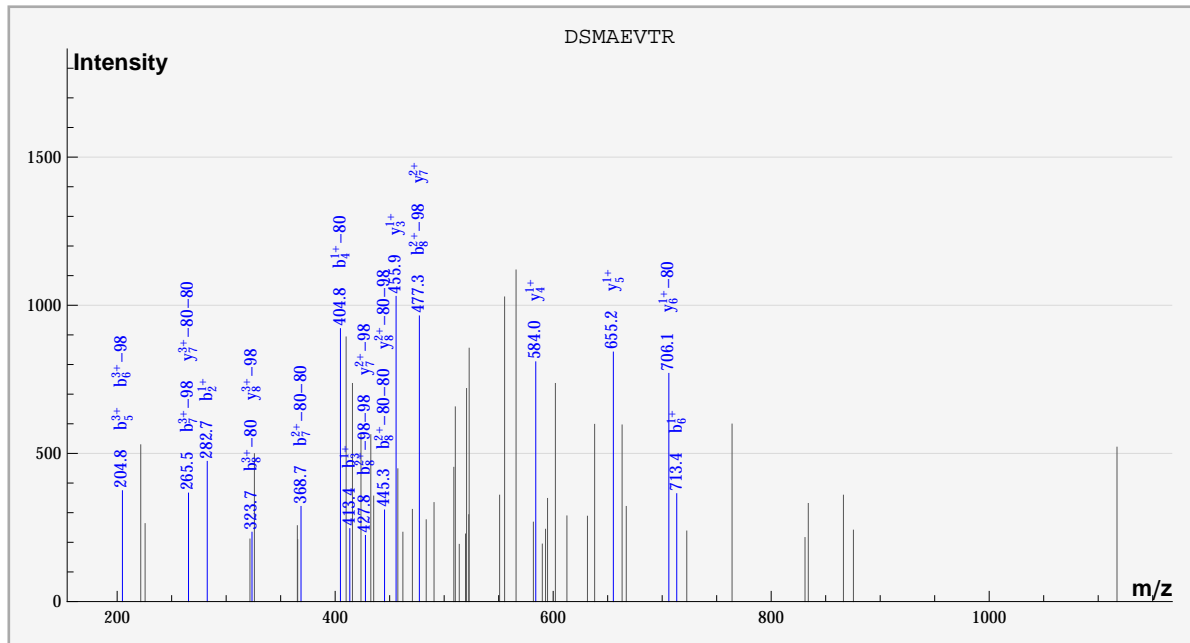

|   | # | b | b* | # | y | y* | P | P* |
|---|---|---|----|---|---|----|---|----|
| D | 1 |   |    |   |   |    |   | ✓  |
| S | 2 | ✓ |    | 7 | ✓ | ✓  |   |    |
| M | 3 | ✓ |    | 6 |   | ✓  |   |    |
| A | 4 |   | ✓  | 5 | ✓ |    |   |    |
| E | 5 | ✓ |    | 4 | ✓ |    |   |    |
| V | 6 | ✓ | ✓  | 3 | ✓ |    |   |    |
| T | 7 |   | ✓  | 2 |   |    |   |    |
| R | 8 |   | ✓  | 1 |   |    |   |    |

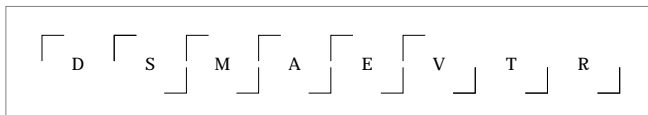

dbValid true ELSGFFRK PHOS(1) 2. 533. -0.747768 4.92068 100. ? 1692.  
 S\_Acido\_new%gi|68566652|gb|AAY79581.1| ELSGFFRK%:::PHOS:::sample\_2%compd\_421

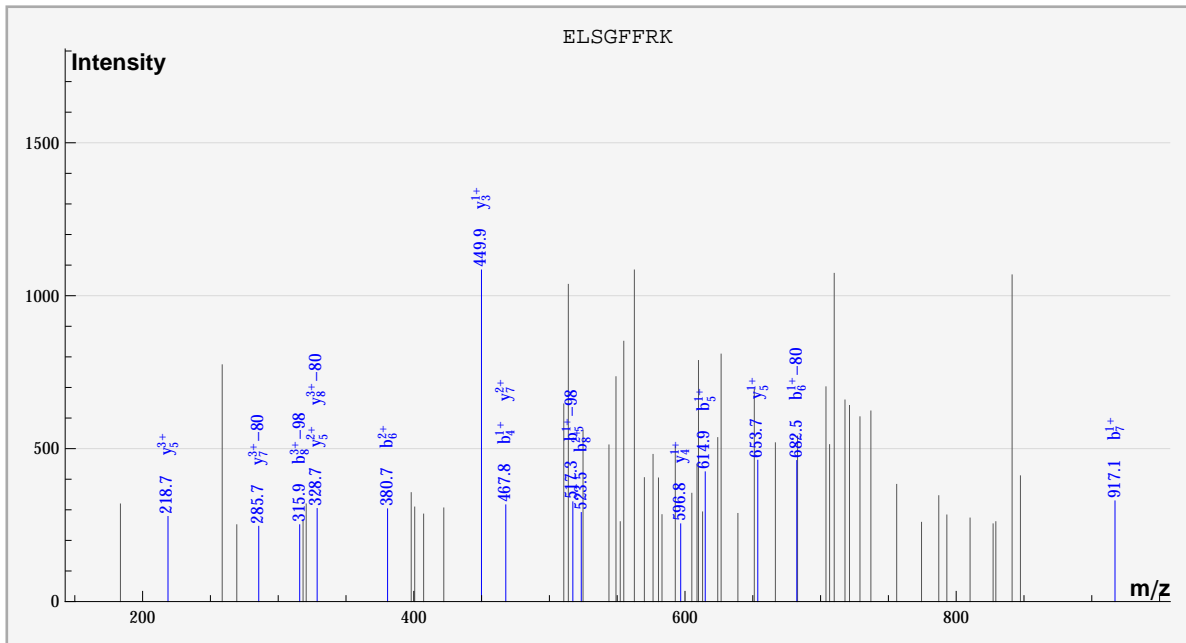

|   | # | b | b* | # | y | y* | P | P* |
|---|---|---|----|---|---|----|---|----|
| E | 1 |   |    |   |   |    |   | ✓  |
| L | 2 |   |    | 7 | ✓ | ✓  |   |    |
| S | 3 |   |    | 6 |   |    |   |    |
| G | 4 | ✓ |    | 5 | ✓ |    |   |    |
| F | 5 | ✓ | ✓  | 4 | ✓ |    |   |    |
| F | 6 | ✓ | ✓  | 3 | ✓ |    |   |    |
| R | 7 | ✓ |    | 2 |   |    |   |    |
| K | 8 | ✓ | ✓  | 1 |   |    |   |    |

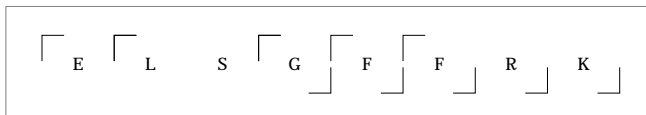

dbValid true EYTIHGIR PHOS(1) 2. 533. 1.74732 4.88535 100. ? 1728.  
 S\_Acido\_new%gi|68568350|gb|AAY81279.1| EYTIHGIR%::PHOS:::sample\_2%compd\_454

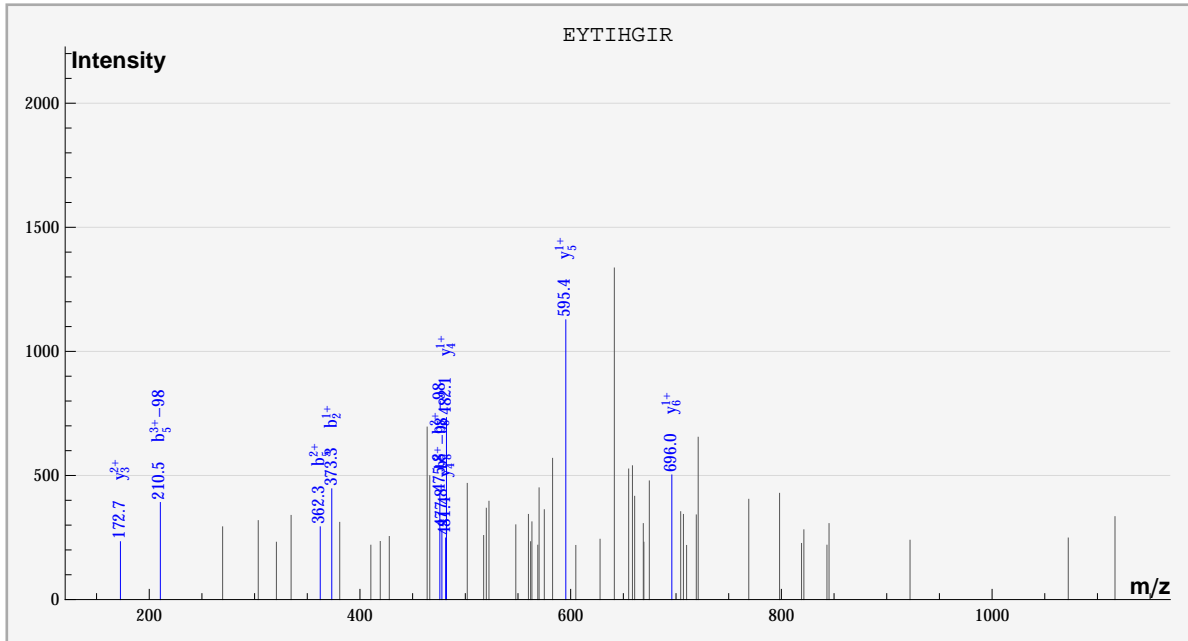

|   | # | b | b* | # | y | y* | P | P* |
|---|---|---|----|---|---|----|---|----|
| E | 1 |   |    |   |   |    |   |    |
| Y | 2 | ✓ |    | 7 |   |    |   |    |
| T | 3 |   |    | 6 | ✓ |    |   |    |
| I | 4 |   |    | 5 | ✓ |    |   |    |
| H | 5 | ✓ | ✓  | 4 | ✓ |    |   |    |
| G | 6 |   |    | 3 | ✓ |    |   |    |
| I | 7 |   |    | 2 |   |    |   |    |
| R | 8 |   | ✓  | 1 |   |    |   |    |

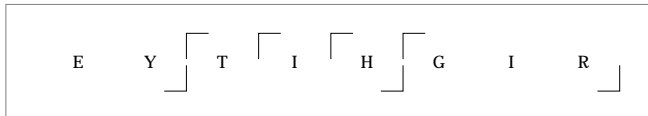

dbValid true FSKDVETR PHOS(1) 2. 533. -1.76322 4.98651 100. ? 1908.  
 S\_Acido\_new%gi|68567791|gb|AAY80720.1| FSKDVETR%::::::PHOS::%sample\_3%compd\_602

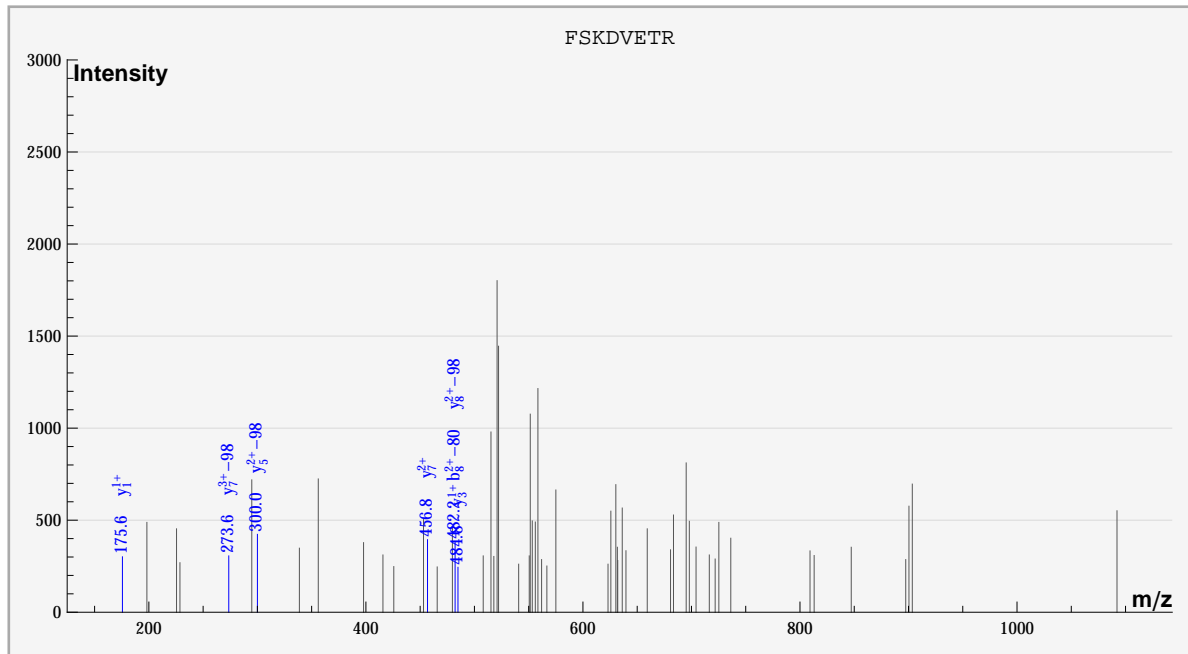

|   | # | b | b* | # | y | y* | P | P* |
|---|---|---|----|---|---|----|---|----|
| F | 1 |   |    |   |   |    |   | ✓  |
| S | 2 |   |    | 7 | ✓ | ✓  |   |    |
| K | 3 |   |    | 6 |   |    |   |    |
| D | 4 |   |    | 5 |   | ✓  |   |    |
| V | 5 |   |    | 4 |   |    |   |    |
| E | 6 |   |    | 3 |   | ✓  |   |    |
| T | 7 |   |    | 2 |   |    |   |    |
| R | 8 | ✓ |    | 1 |   | ✓  |   |    |

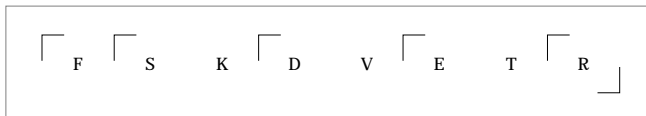

dbValid true DRIEYMR PHOS(1) 2. 533. -1.27447 4.85362 100. ? 1920.  
 S\_Acido\_new%gi|68566842|gb|AAY79771.1| DRIEYMR%::::PHOS:::sample\_3%compd\_612

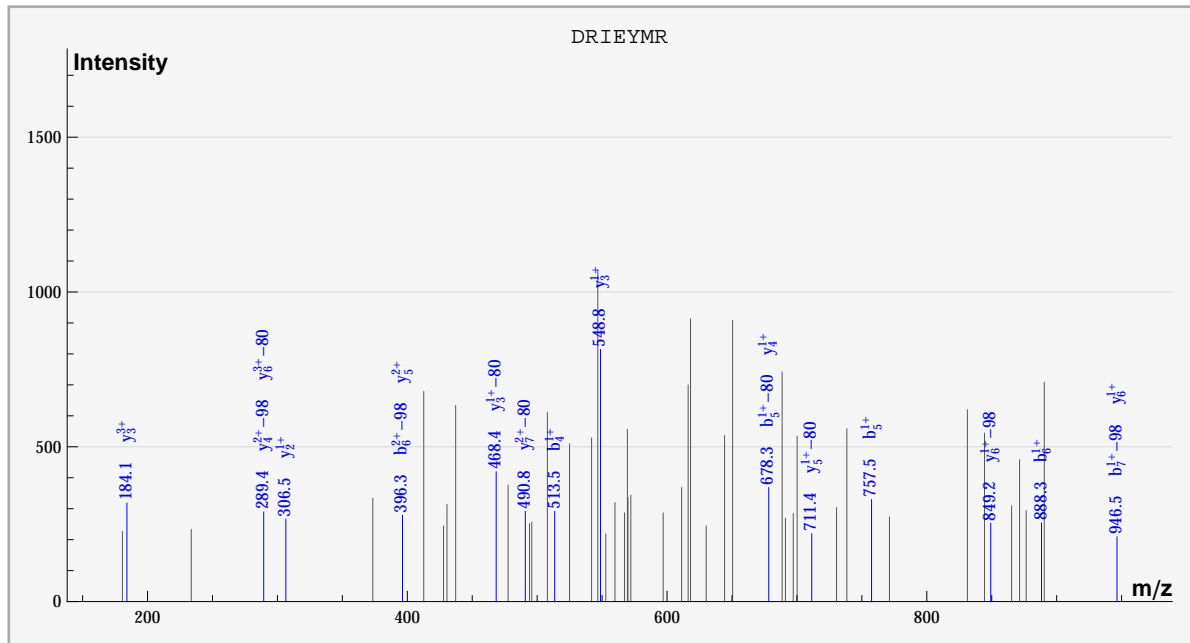

|   | # | b | b* | # | y | y* | P | P* |
|---|---|---|----|---|---|----|---|----|
| D | 1 |   |    |   |   |    |   | ✓  |
| R | 2 |   |    | 6 | ✓ | ✓  |   |    |
| I | 3 |   |    | 5 | ✓ | ✓  |   |    |
| E | 4 | ✓ |    | 4 | ✓ | ✓  |   |    |
| Y | 5 | ✓ | ✓  | 3 | ✓ | ✓  |   |    |
| M | 6 | ✓ | ✓  | 2 | ✓ |    |   |    |
| R | 7 |   | ✓  | 1 |   |    |   |    |

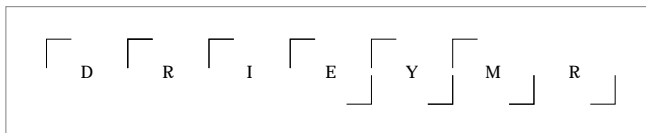

dbValid true NSIIGVNNR PHOS(1) 2. 533. 0.755677 5.09966 100. ? 1980.  
 S\_Acido\_new%gi|68566686|gb|AAY79615.1| NSIIGVNNR%::PHOS:::sample\_3%cmpd\_663

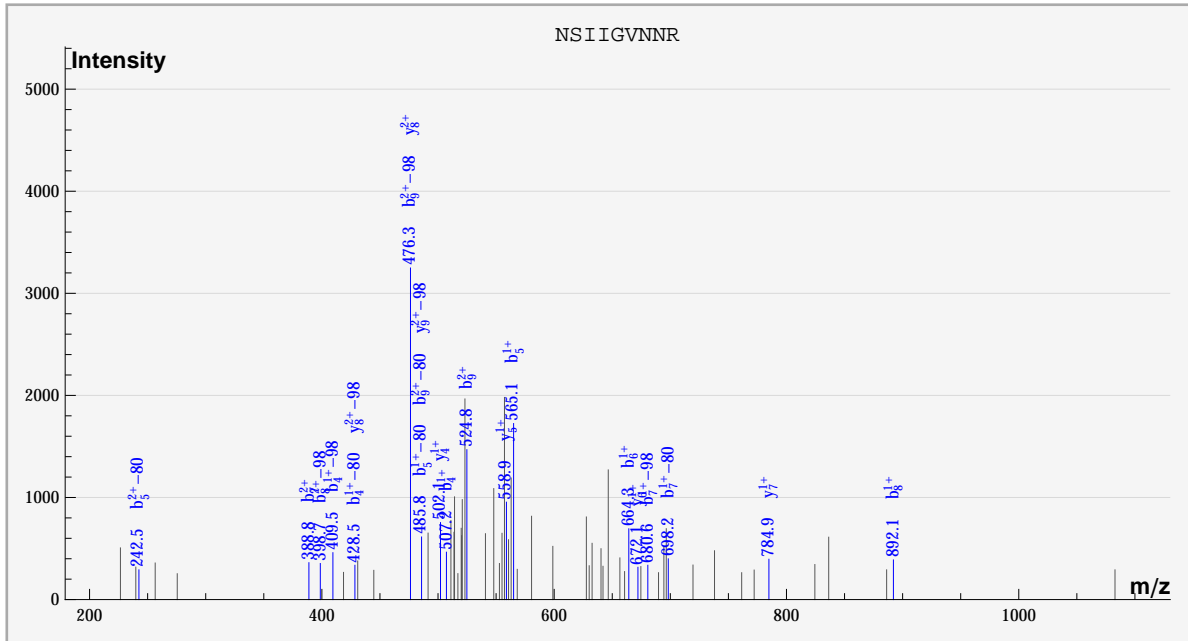

|   | # | b | b* | # | y | y* | P | P* |
|---|---|---|----|---|---|----|---|----|
| N | 1 |   |    |   |   |    |   | ✓  |
| S | 2 |   |    | 8 | ✓ | ✓  |   |    |
| I | 3 |   |    | 7 | ✓ |    |   |    |
| I | 4 | ✓ | ✓  | 6 | ✓ |    |   |    |
| G | 5 | ✓ | ✓  | 5 | ✓ |    |   |    |
| V | 6 | ✓ |    | 4 | ✓ |    |   |    |
| N | 7 | ✓ | ✓  | 3 |   |    |   |    |
| N | 8 | ✓ | ✓  | 2 |   |    |   |    |
| R | 9 | ✓ | ✓  | 1 |   |    |   |    |

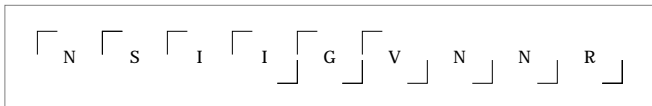

dbValid true DEYSLISR PHOS(1) 2. 533. -1.27121 5.45482 100. ? 2004.  
 S\_Acido\_new%gi|68568021|gb|AAY80950.1| DEYSLISR%:::PHOS:::sample\_2%compd\_708

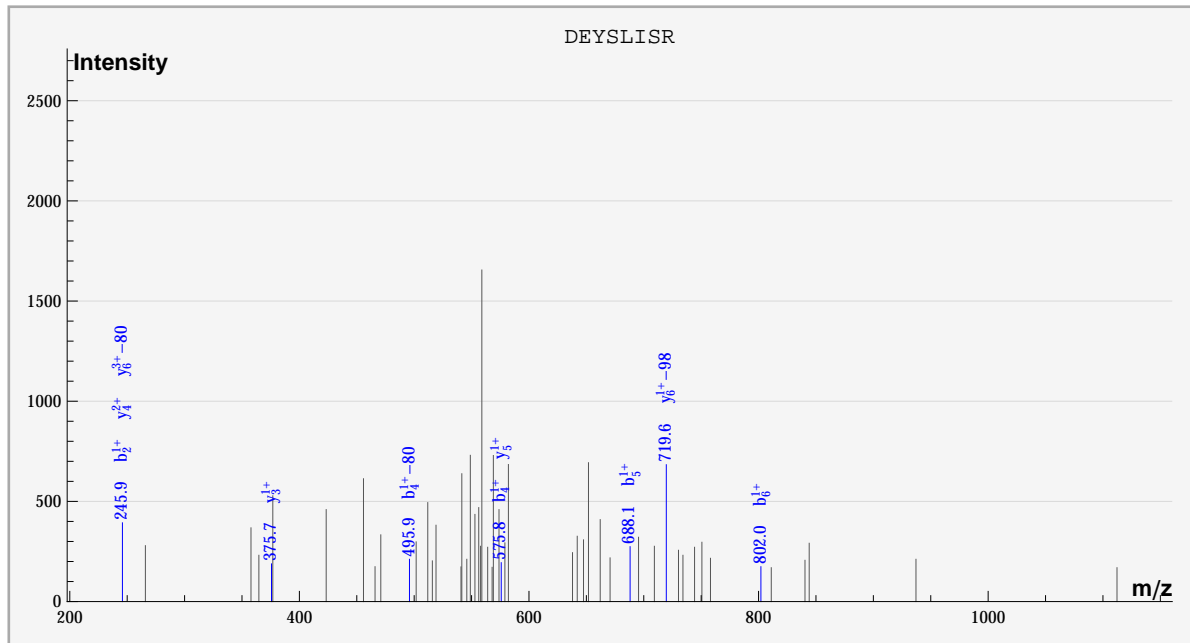

|   | # | b | b* | # | y | y* | P | P* |
|---|---|---|----|---|---|----|---|----|
| D | 1 |   |    |   |   |    |   |    |
| E | 2 | ✓ |    | 7 |   |    |   |    |
| Y | 3 |   |    | 6 |   | ✓  |   |    |
| S | 4 | ✓ | ✓  | 5 | ✓ |    |   |    |
| L | 5 | ✓ |    | 4 | ✓ |    |   |    |
| I | 6 | ✓ |    | 3 | ✓ |    |   |    |
| S | 7 |   |    | 2 |   |    |   |    |
| R | 8 |   |    | 1 |   |    |   |    |

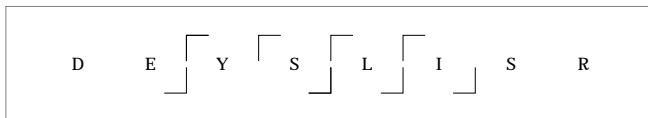



dbValid true RILLGGVTR PHOS(1) 2. 533. -0.197578 5.05814 100. ? 2016.  
 S\_Acido\_new%gi|68567575|gb|AAY80504.1| RILLGGVTR%:::PHOS::%sample\_2%cmpd\_672

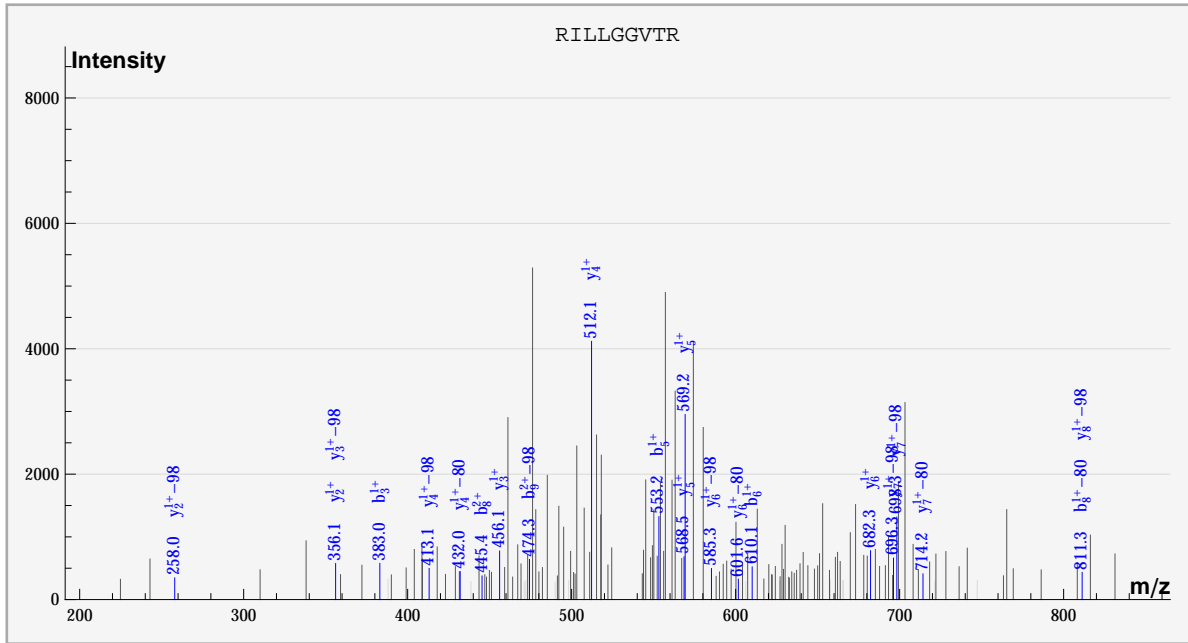

|   | # | b | b* | # | y | y* | P | P* |
|---|---|---|----|---|---|----|---|----|
| R | 1 |   |    |   |   |    |   |    |
| I | 2 |   |    | 8 |   | ✓  |   |    |
| L | 3 | ✓ |    | 7 |   | ✓  |   |    |
| L | 4 |   |    | 6 | ✓ | ✓  |   |    |
| G | 5 | ✓ |    | 5 | ✓ | ✓  |   |    |
| G | 6 | ✓ |    | 4 | ✓ | ✓  |   |    |
| V | 7 |   |    | 3 | ✓ | ✓  |   |    |
| T | 8 | ✓ | ✓  | 2 | ✓ | ✓  |   |    |
| R | 9 |   | ✓  | 1 |   |    |   |    |

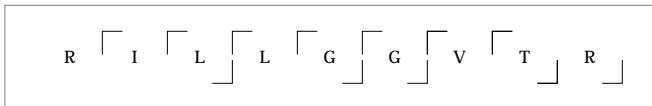

dbValid true LTVYYDK PHOS(2) 2. 533. -1.79678 4.92048 100. ? 2256.  
 S\_Acido\_new%gi|68568678|gb|AAy81607.1| LTVYYDK%::PHOS::PHOS::%sample\_2%compd\_940

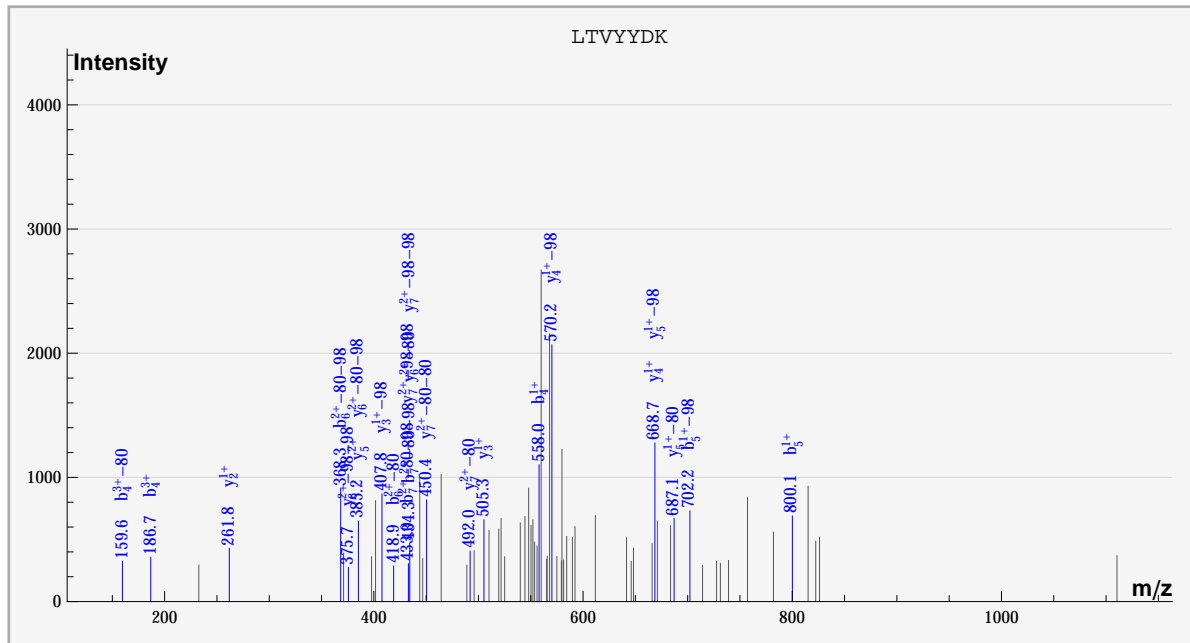

|   | # | b | b* | # | y | y* | P | P* |
|---|---|---|----|---|---|----|---|----|
| L | 1 |   |    |   |   |    |   | ✓  |
| T | 2 |   |    | 6 |   | ✓  |   |    |
| V | 3 |   |    | 5 | ✓ | ✓  |   |    |
| Y | 4 | ✓ | ✓  | 4 | ✓ | ✓  |   |    |
| Y | 5 | ✓ | ✓  | 3 | ✓ | ✓  |   |    |
| D | 6 |   | ✓  | 2 | ✓ |    |   |    |
| K | 7 |   | ✓  | 1 |   |    |   |    |

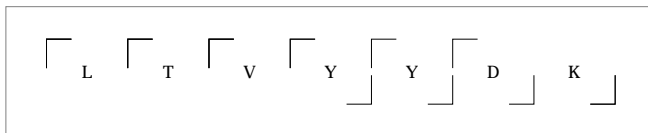

dbValid true LVKVLGLSR PHOS(1) 2. 533. -0.185003 4.90143 100. ? 2580.  
 S\_Acido\_new%gi|68568428|gb|AAy81357.1| LVKVLGLSR%:::::PHOS::%sample\_2%compd\_1238

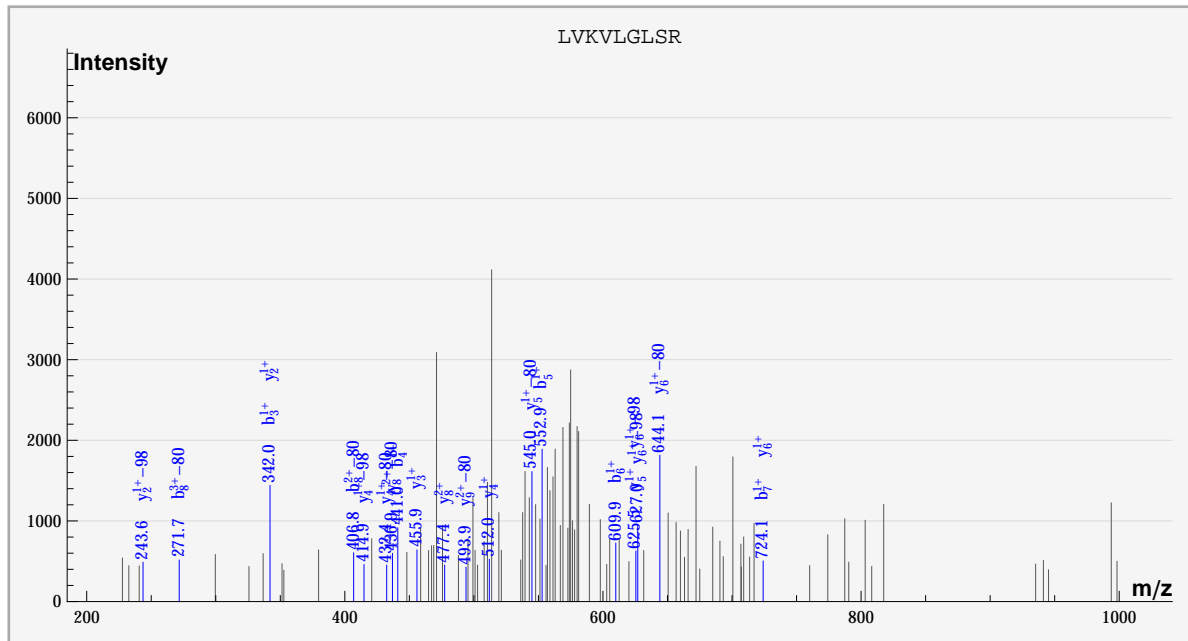

|   | # | b | b* | # | y | y* | P | P* |
|---|---|---|----|---|---|----|---|----|
| L | 1 |   |    |   |   |    |   | ✓  |
| V | 2 |   |    | 8 | ✓ | ✓  |   |    |
| K | 3 | ✓ |    | 7 |   |    |   |    |
| V | 4 | ✓ |    | 6 | ✓ | ✓  |   |    |
| L | 5 | ✓ |    | 5 | ✓ | ✓  |   |    |
| G | 6 | ✓ |    | 4 | ✓ | ✓  |   |    |
| L | 7 | ✓ |    | 3 | ✓ |    |   |    |
| S | 8 |   | ✓  | 2 | ✓ | ✓  |   |    |
| R | 9 |   |    | 1 |   |    |   |    |

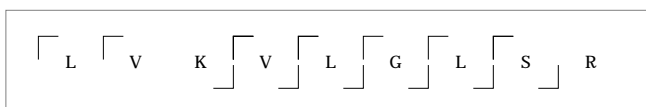

dbValid true DEYSLISR PHOS(1) 2. 533. -1.27121 5.27581 100. ? 3036.  
 S\_Acido\_new%gi|68568021|gb|AAY80950.1| DEYSLISR%:::PHOS:::sample\_2%compd\_1659

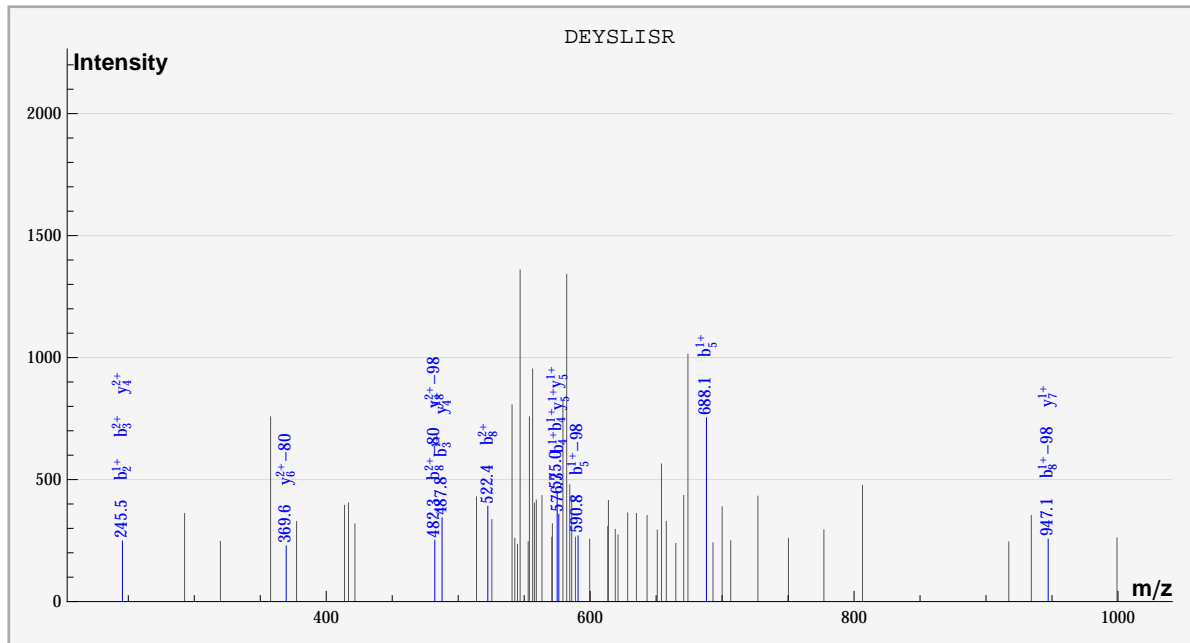

|   | # | b | b* | # | y | y* | P | P* |
|---|---|---|----|---|---|----|---|----|
| D | 1 |   |    |   |   |    |   | ✓  |
| E | 2 | ✓ |    | 7 | ✓ |    |   |    |
| Y | 3 | ✓ |    | 6 |   | ✓  |   |    |
| S | 4 | ✓ |    | 5 | ✓ |    |   |    |
| L | 5 | ✓ | ✓  | 4 | ✓ |    |   |    |
| I | 6 |   |    | 3 |   |    |   |    |
| S | 7 |   |    | 2 |   |    |   |    |
| R | 8 | ✓ | ✓  | 1 |   |    |   |    |

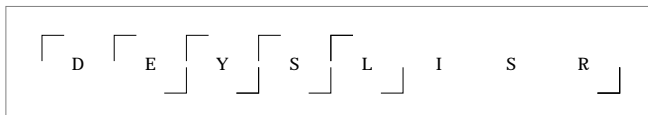

dbValid true SMISFYR PHOS(2) 2. 533. -0.810403 5.37573 100. ? 4752.  
 S\_Acido\_new%gi|68567224|gb|AAY80153.1| SMISFYR%:PHOS::PHOS:::%sample\_2%cmpd\_3226

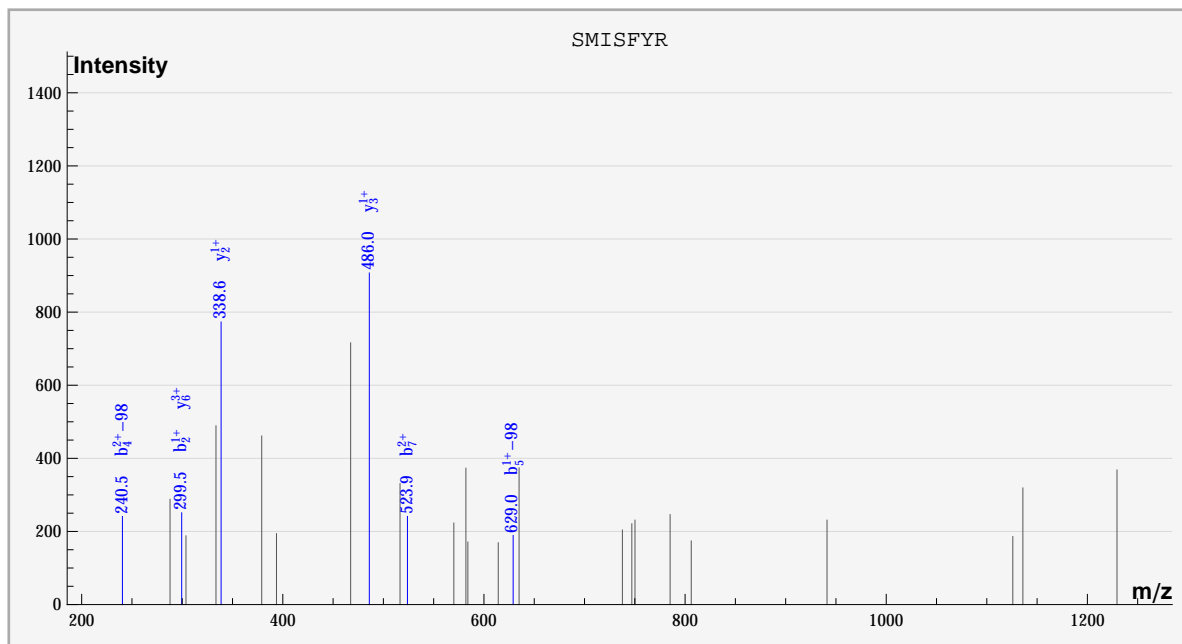

|   | # | b | b* | # | y | y* | P | P* |
|---|---|---|----|---|---|----|---|----|
| S | 1 |   |    |   |   |    |   |    |
| M | 2 | ✓ |    | 6 | ✓ |    |   |    |
| I | 3 |   |    | 5 |   |    |   |    |
| S | 4 |   | ✓  | 4 |   |    |   |    |
| F | 5 |   | ✓  | 3 | ✓ |    |   |    |
| Y | 6 |   |    | 2 | ✓ |    |   |    |
| R | 7 | ✓ |    | 1 |   |    |   |    |

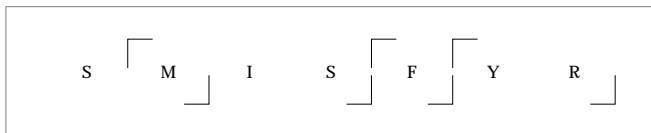

dbValid true TSEETMK PHOS(3) 2. 534. -0.863973 5.49958 100. ? 1386.

S\_Acido\_new%gil68567506|gb|AAY80435.1| TSEETMK%:PHOS:PHOS::PHOS::%sample\_2%compd\_150

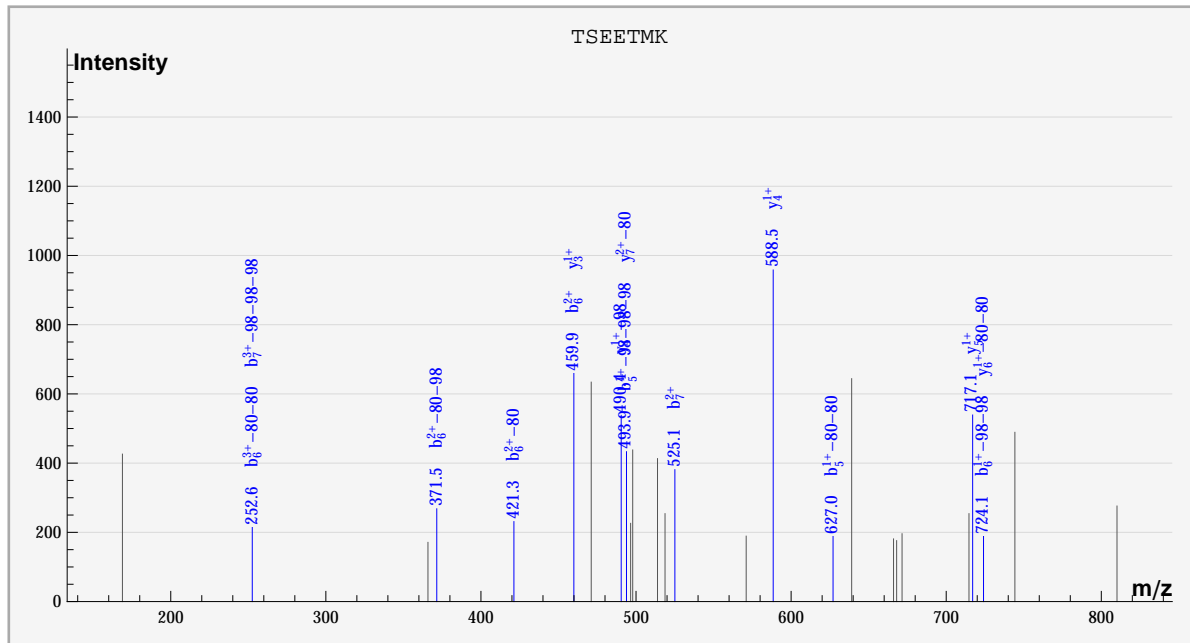

|   | # | b | b* | # | y | y* | P | P* |
|---|---|---|----|---|---|----|---|----|
| T | 1 |   |    |   |   |    |   | ✓  |
| S | 2 |   |    | 6 |   | ✓  |   |    |
| E | 3 |   |    | 5 | ✓ |    |   |    |
| E | 4 |   |    | 4 | ✓ | ✓  |   |    |
| T | 5 |   | ✓  | 3 | ✓ |    |   |    |
| M | 6 | ✓ | ✓  | 2 |   |    |   |    |
| K | 7 | ✓ | ✓  | 1 |   |    |   |    |

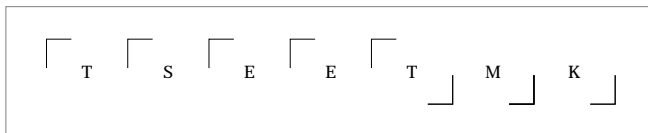

dbValid true VSLFPAVTR PHOS(1) 2. 534. 1.27571 4.88353 100. ? 1836.  
 S\_Acido\_new%gil68568355|gb|AAy81284.1| VSLFPAVTR%::PHOS:::sample\_2%compd\_555

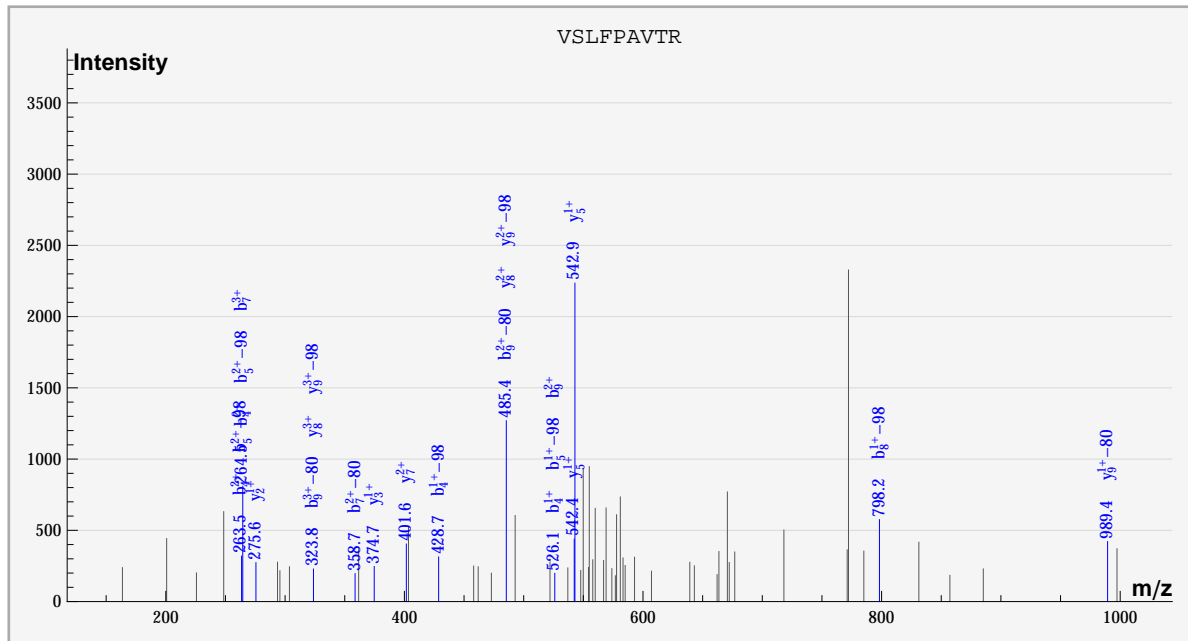

|   | # | b | b* | # | y | y* | P | P* |
|---|---|---|----|---|---|----|---|----|
| V | 1 |   |    |   |   |    |   | ✓  |
| S | 2 |   |    | 8 | ✓ |    |   |    |
| L | 3 |   |    | 7 | ✓ |    |   |    |
| F | 4 | ✓ | ✓  | 6 |   |    |   |    |
| P | 5 |   | ✓  | 5 | ✓ |    |   |    |
| A | 6 |   |    | 4 |   |    |   |    |
| V | 7 | ✓ | ✓  | 3 | ✓ |    |   |    |
| T | 8 |   | ✓  | 2 | ✓ |    |   |    |
| R | 9 | ✓ | ✓  | 1 |   |    |   |    |

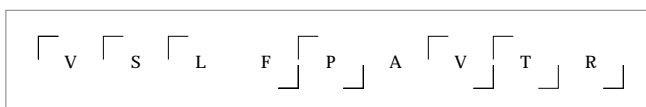

dbValid true KIITVNATK PHOS(1) 2. 534. 0.296642 5.29685 100. ? 2904.  
 S\_Acido\_new%gi|68568607|gb|AAY81536.1| KIITVNATK%:::PHOS:::sample\_2%compd\_1538

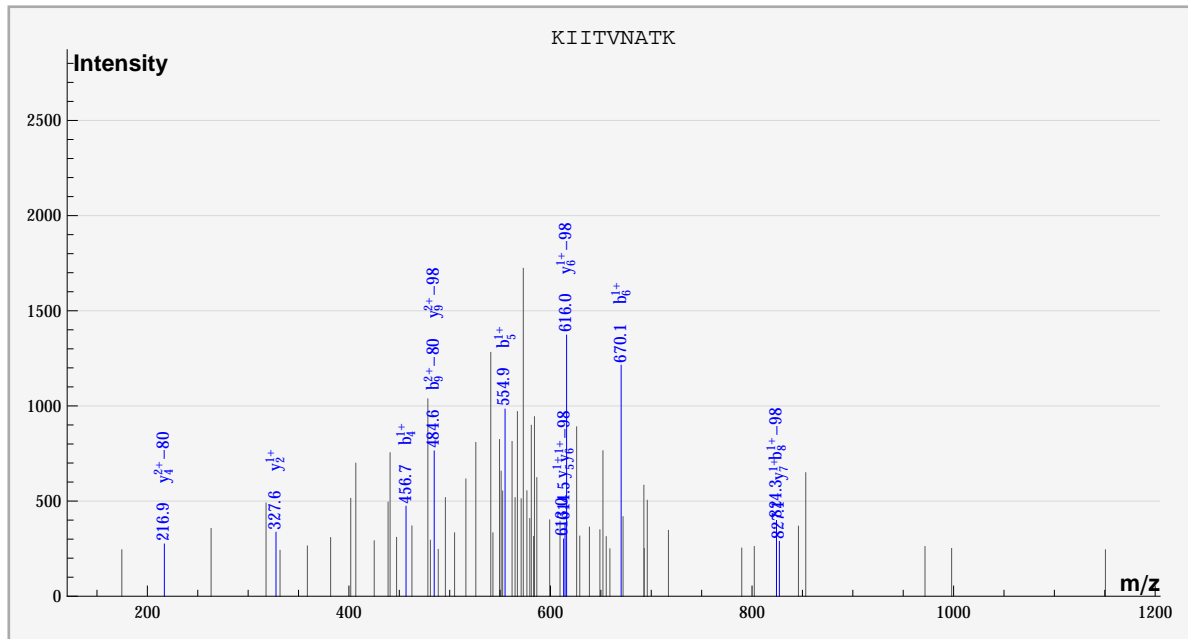

|   | # | b | b* | # | y | y* | P | P* |
|---|---|---|----|---|---|----|---|----|
| K | 1 |   |    |   |   |    |   | ✓  |
| I | 2 |   |    | 8 |   |    |   |    |
| I | 3 |   |    | 7 | ✓ |    |   |    |
| T | 4 | ✓ |    | 6 |   | ✓  |   |    |
| V | 5 | ✓ |    | 5 | ✓ |    |   |    |
| N | 6 | ✓ |    | 4 |   | ✓  |   |    |
| A | 7 |   |    | 3 |   |    |   |    |
| T | 8 |   | ✓  | 2 | ✓ |    |   |    |
| K | 9 |   | ✓  | 1 |   |    |   |    |

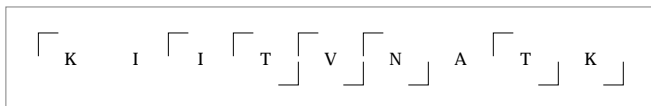



dbValid true KTWLMYK Oxidation\_M(1),PHOS(1) 2. 535. -1.75444 5.27928 100. ? 2172.  
 S\_Acido\_new%gil68567318|gb|AAY80247.1| KTWLMYK%::PHOS::Oxidation\_M::%sample\_2%compd\_865

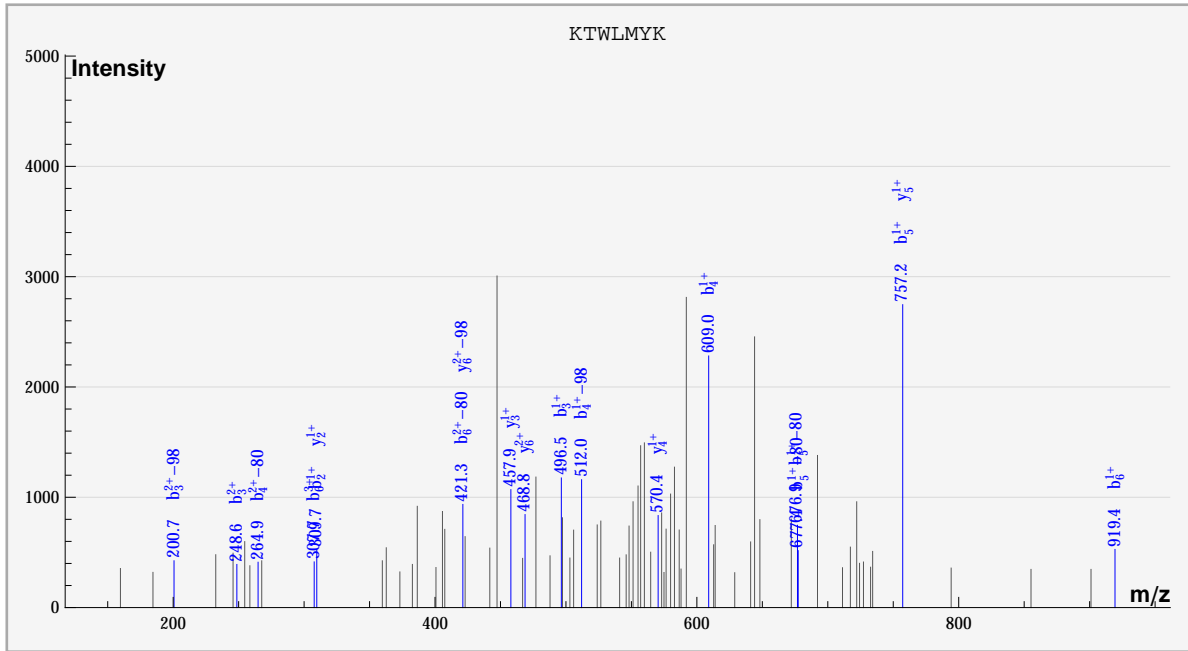

|   | # | b | b* | # | y | y* | P | P* |
|---|---|---|----|---|---|----|---|----|
| K | 1 |   |    |   |   |    |   |    |
| T | 2 | ✓ |    | 6 | ✓ | ✓  |   |    |
| W | 3 | ✓ | ✓  | 5 | ✓ |    |   |    |
| L | 4 | ✓ | ✓  | 4 | ✓ |    |   |    |
| M | 5 | ✓ | ✓  | 3 | ✓ |    |   |    |
| Y | 6 | ✓ | ✓  | 2 | ✓ |    |   |    |
| K | 7 |   |    | 1 |   |    |   |    |

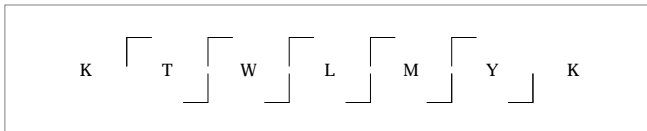

dbValid true ISDLGSSVK PHOS(2) 2. 535. -1.78314 4.9248 100. ? 2424.  
 S\_Acido\_new%gi|68567611|gb|AAy80540.1| ISDLGSSVK%::PHOS:::PHOS:::sample\_2%compd\_1098

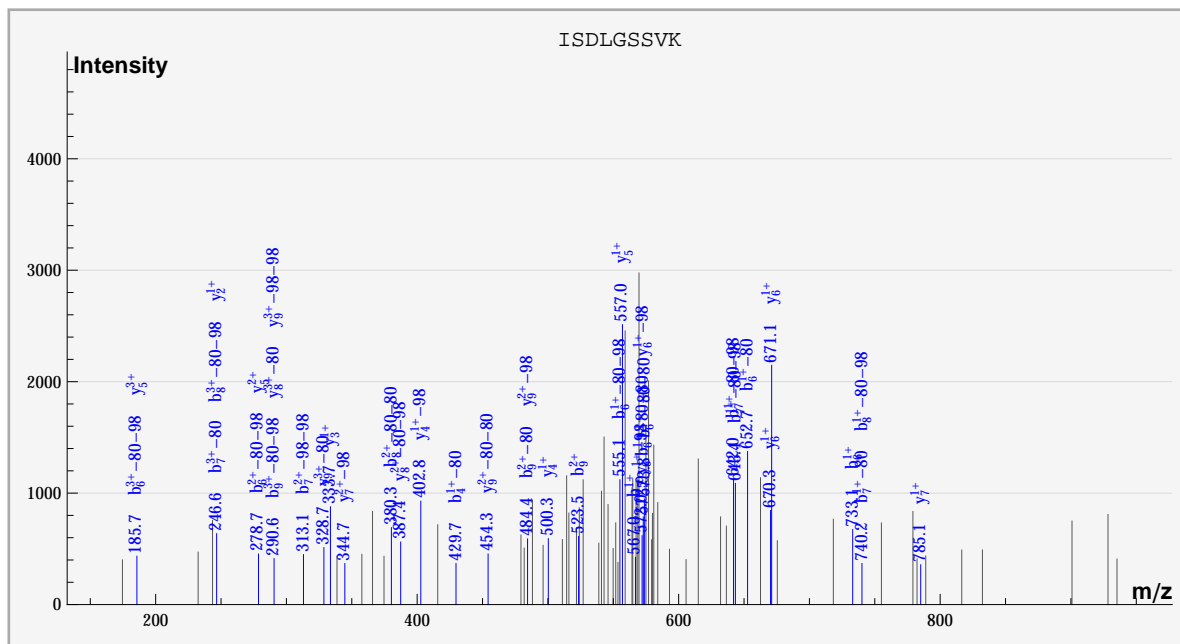

|   | # | b | b* | # | y | y* | P | P* |
|---|---|---|----|---|---|----|---|----|
| I | 1 |   |    |   |   |    |   | ✓  |
| S | 2 |   |    | 8 |   | ✓  |   |    |
| D | 3 |   |    | 7 | ✓ | ✓  |   |    |
| L | 4 |   | ✓  | 6 | ✓ | ✓  |   |    |
| G | 5 | ✓ |    | 5 | ✓ |    |   |    |
| S | 6 | ✓ | ✓  | 4 | ✓ | ✓  |   |    |
| S | 7 |   | ✓  | 3 | ✓ |    |   |    |
| V | 8 |   | ✓  | 2 | ✓ |    |   |    |
| K | 9 | ✓ | ✓  | 1 |   |    |   |    |

I S D L G S S V K

dbValid true SRSIDVTK PHOS(2) 2. 535. -1.77752 4.94092 100. ? 2448.

S\_Acido\_new%gi|68567752|gb|AAy80681.1| SRSIDVTK%:PHOS:::PHOS::%sample\_2%compd\_1119

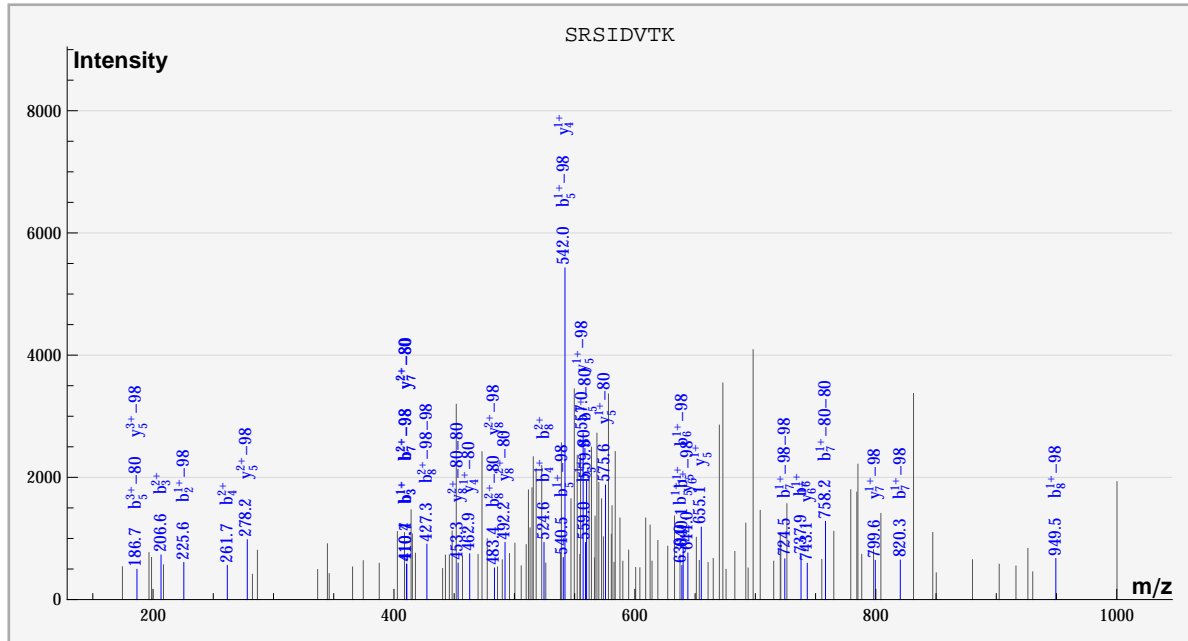

|   | # | b | b* | # | y | y* | P | P* |
|---|---|---|----|---|---|----|---|----|
| S | 1 |   |    |   |   |    |   | ✓  |
| R | 2 |   | ✓  | 7 |   | ✓  |   |    |
| S | 3 | ✓ |    | 6 | ✓ | ✓  |   |    |
| I | 4 | ✓ |    | 5 | ✓ | ✓  |   |    |
| D | 5 | ✓ | ✓  | 4 | ✓ | ✓  |   |    |
| V | 6 | ✓ | ✓  | 3 |   |    |   |    |
| T | 7 |   | ✓  | 2 |   |    |   |    |
| K | 8 | ✓ | ✓  | 1 |   |    |   |    |

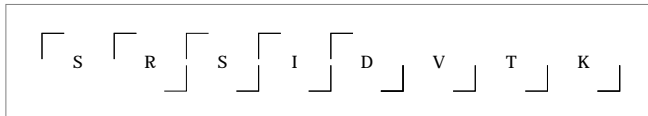

dbValid true YSISNDK PHOS(3) 2. 535. -1.34984 5.36755 100. ? 2856.

S\_Acido\_new%gi|68567722|gb|AAY80651.1| YSISNDK%:PHOS:PHOS::%sample\_0%cmpd\_1452

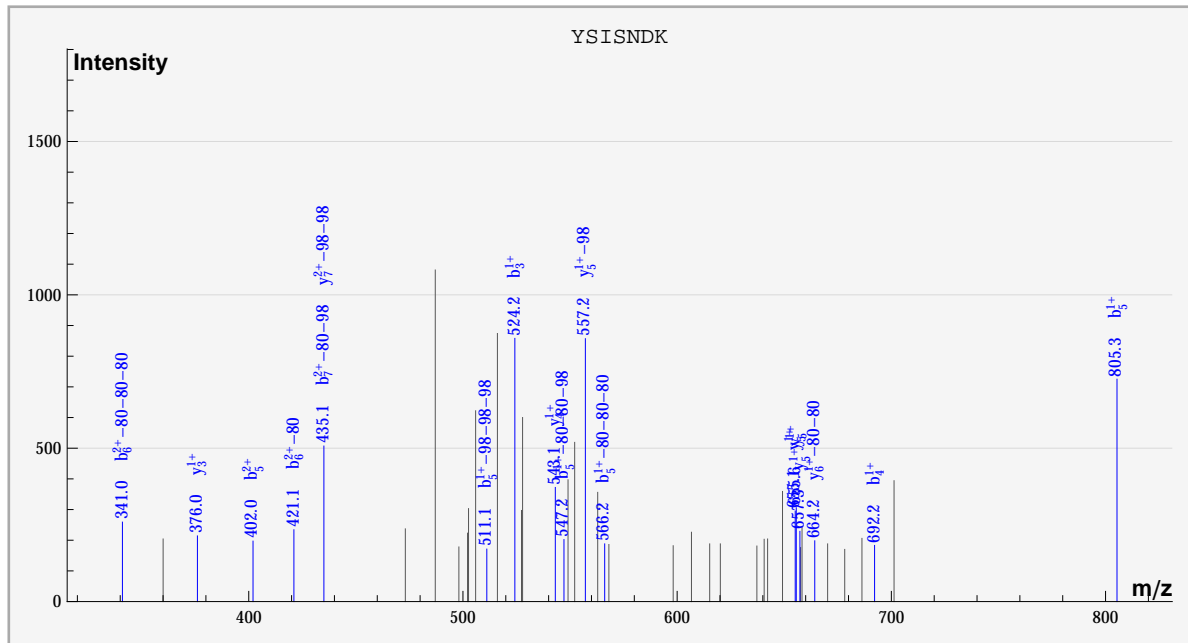

|   | # | b | b* | # | y | y* | P | P* |
|---|---|---|----|---|---|----|---|----|
| Y | 1 |   |    |   |   |    |   | ✓  |
| S | 2 |   |    | 6 |   | ✓  |   |    |
| I | 3 | ✓ |    | 5 | ✓ | ✓  |   |    |
| S | 4 | ✓ |    | 4 | ✓ |    |   |    |
| N | 5 | ✓ | ✓  | 3 | ✓ |    |   |    |
| D | 6 |   | ✓  | 2 |   |    |   |    |
| K | 7 |   | ✓  | 1 |   |    |   |    |

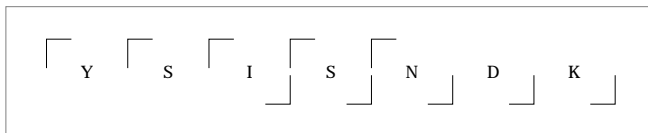

dbValid true YSISNDK PHOS(3) 2. 535. -1.34984 5.02111 100. ? 2868.

S\_Acido\_new%gi|68567722|gb|AAY80651.1| YSISNDK%:PHOS:PHOS::PHOS:::sample\_0%compd\_1463

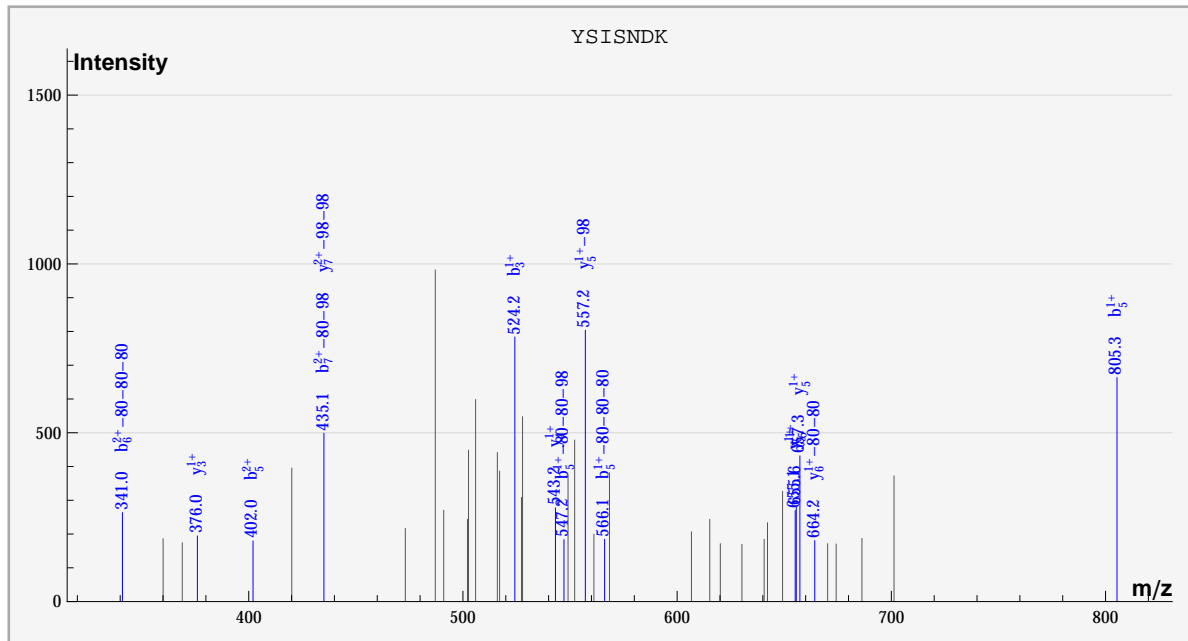

|   | # | b | b* | # | y | y* | P | P* |
|---|---|---|----|---|---|----|---|----|
| Y | 1 |   |    |   |   |    |   | ✓  |
| S | 2 |   |    | 6 |   | ✓  |   |    |
| I | 3 | ✓ |    | 5 | ✓ | ✓  |   |    |
| S | 4 |   |    | 4 | ✓ |    |   |    |
| N | 5 | ✓ | ✓  | 3 | ✓ |    |   |    |
| D | 6 |   | ✓  | 2 |   |    |   |    |
| K | 7 |   | ✓  | 1 |   |    |   |    |

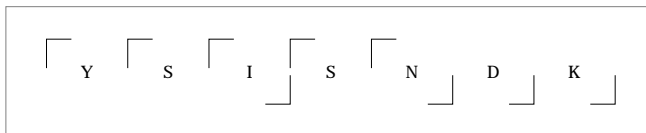

dbValid true YSISNDK PHOS(3) 2. 535. -1.34984 5.04783 100. ? 2904.  
 S\_Acido\_new%gi|68567722|gb|AAy80651.1| YSISNDK%:PHOS:PHOS::%sample\_0%cmpd\_1494

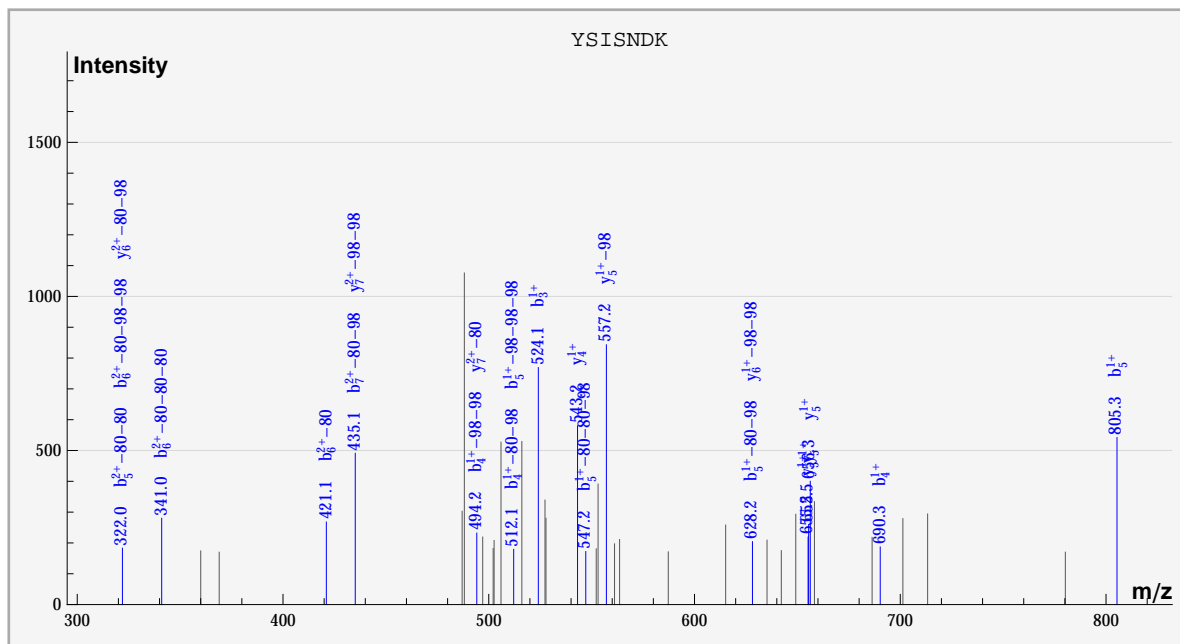

|   | # | b | b* | # | y | y* | P | P* |
|---|---|---|----|---|---|----|---|----|
| Y | 1 |   |    |   |   |    |   | ✓  |
| S | 2 |   |    | 6 |   | ✓  |   |    |
| I | 3 | ✓ |    | 5 | ✓ | ✓  |   |    |
| S | 4 | ✓ | ✓  | 4 | ✓ |    |   |    |
| N | 5 | ✓ | ✓  | 3 |   |    |   |    |
| D | 6 |   | ✓  | 2 |   |    |   |    |
| K | 7 |   | ✓  | 1 |   |    |   |    |

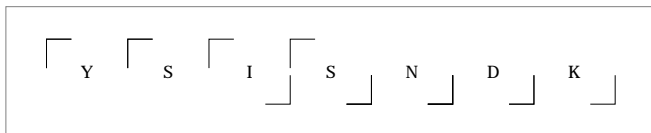

dbValid true AFTPGCTR Cys\_CAM(1),PHOS(2) 2. 535. 0.182297 5.19091 100. ? 4338.

S\_Acido\_new%gil68566558|gb|AAY79487.1| AFTPGCTR%:::PHOS:::Cys\_CAM:PHOS:::sample\_2%compd\_2854

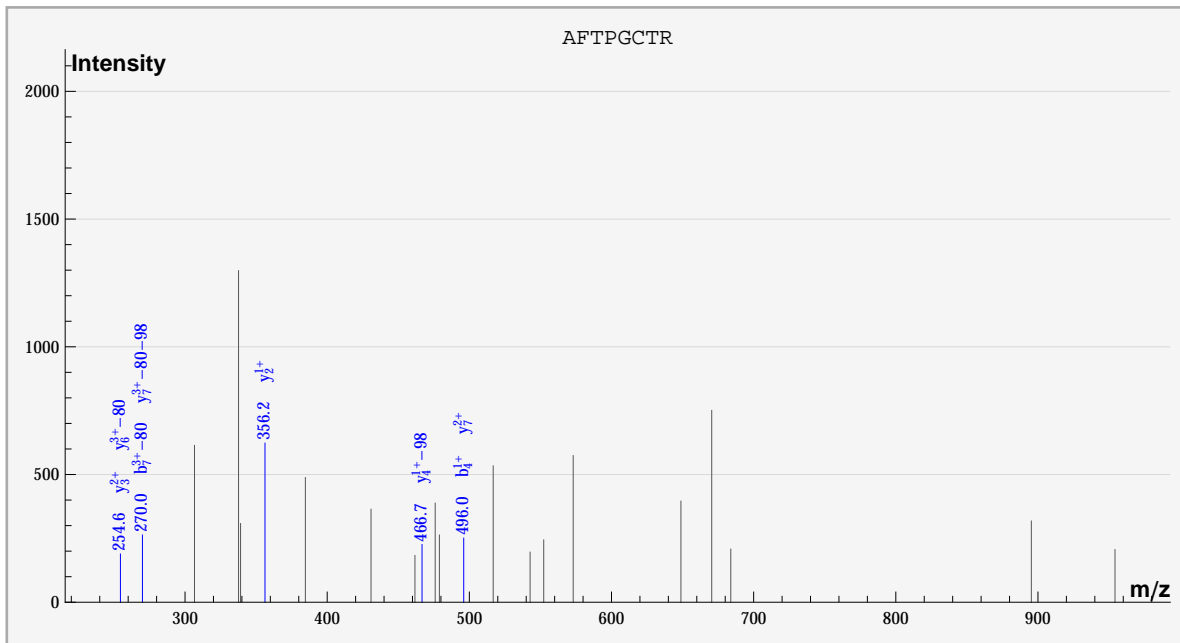

|   | # | b | b* | # | y | y* | P | P* |
|---|---|---|----|---|---|----|---|----|
| A | 1 |   |    |   |   |    |   |    |
| F | 2 |   |    | 7 | ✓ | ✓  |   |    |
| T | 3 |   |    | 6 |   | ✓  |   |    |
| P | 4 | ✓ |    | 5 |   |    |   |    |
| G | 5 |   |    | 4 |   | ✓  |   |    |
| C | 6 |   |    | 3 | ✓ |    |   |    |
| T | 7 |   | ✓  | 2 | ✓ |    |   |    |
| R | 8 |   |    | 1 |   |    |   |    |

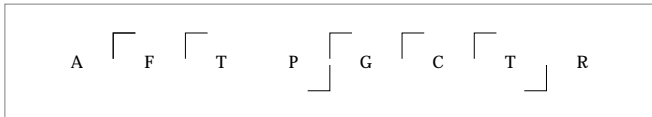

dbValid true YRELEKR PHOS(1) 2. 536. 1.26059 4.94035 100. ? 2520.  
 S\_Acido\_new%gi|68567611|gb|AAY80540.1| YRELEKR%:PHOS:::sample\_0%compd\_1157

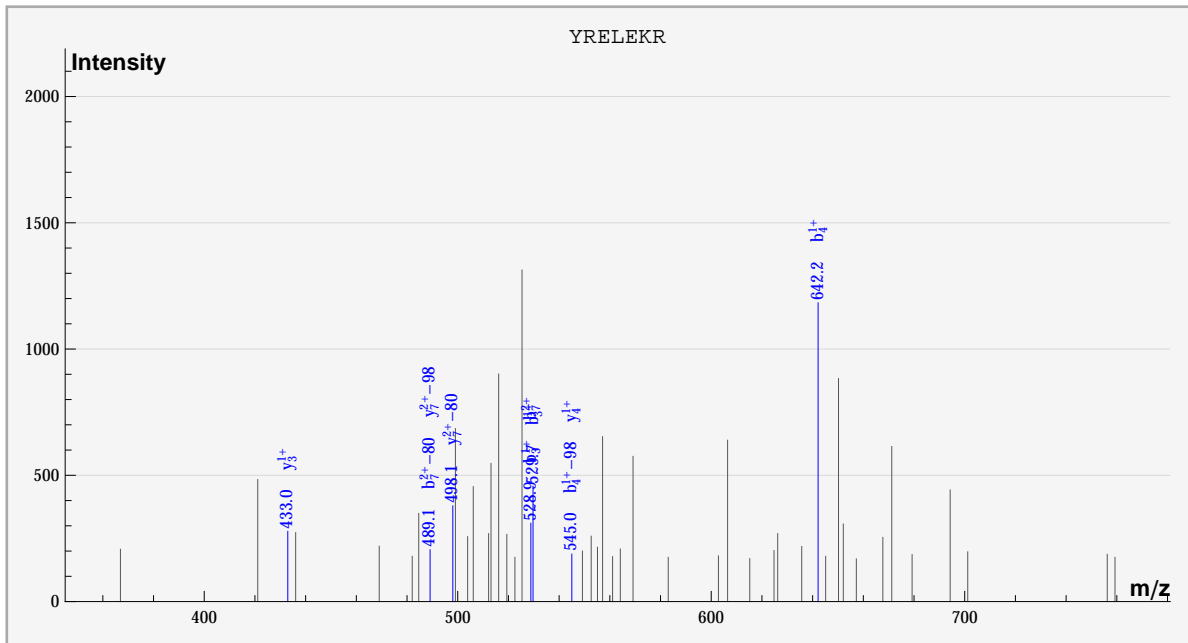

|   | # | b | b* | # | y | y* | P | P* |
|---|---|---|----|---|---|----|---|----|
| Y | 1 |   |    |   |   |    |   | ✓  |
| R | 2 |   |    | 6 |   |    |   |    |
| E | 3 | ✓ |    | 5 |   |    |   |    |
| L | 4 | ✓ | ✓  | 4 | ✓ |    |   |    |
| E | 5 |   |    | 3 | ✓ |    |   |    |
| K | 6 |   |    | 2 |   |    |   |    |
| R | 7 | ✓ | ✓  | 1 |   |    |   |    |

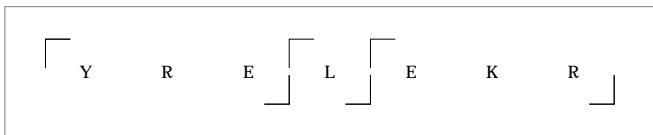



dbValid true WKKLVYR PHOS(1) 2. 536. 0.788787 4.85897 100. ? 2748.  
 S\_Acido\_new%gi|68568073|gb|AAY81002.1| WKKLVYR%:::::PHOS::%sample\_0%compd\_1358

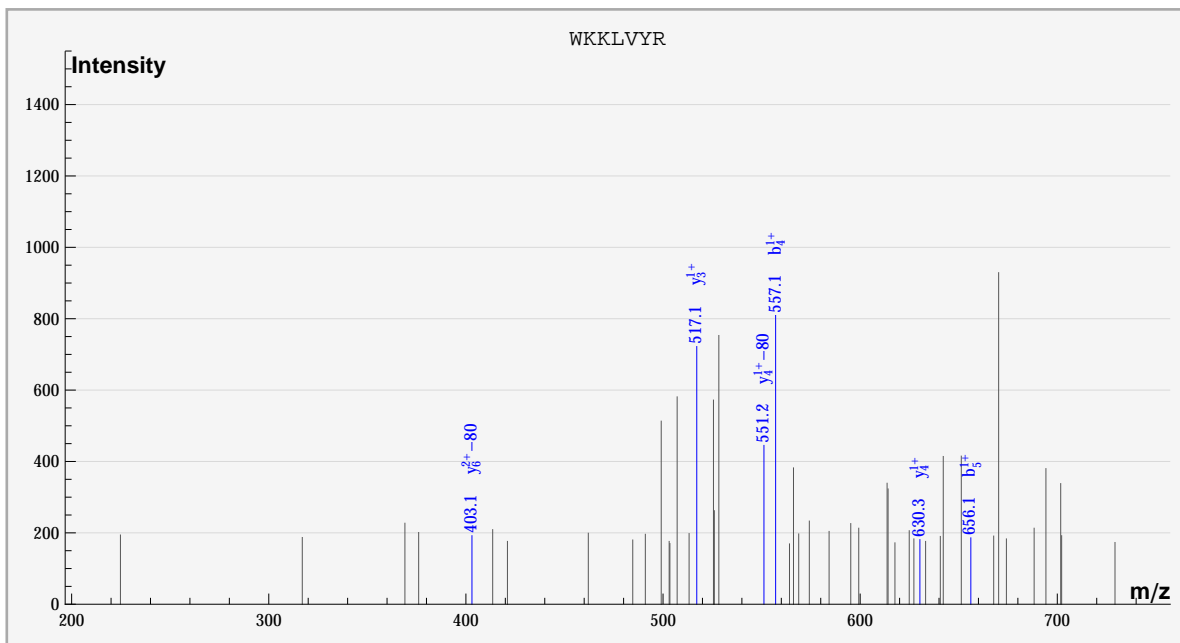

|   | # | b | b* | # | y | y* | P | P* |
|---|---|---|----|---|---|----|---|----|
| W | 1 |   |    |   |   |    |   |    |
| K | 2 |   |    | 6 |   | ✓  |   |    |
| K | 3 |   |    | 5 |   |    |   |    |
| L | 4 | ✓ |    | 4 | ✓ | ✓  |   |    |
| V | 5 | ✓ |    | 3 | ✓ |    |   |    |
| Y | 6 |   |    | 2 |   |    |   |    |
| R | 7 |   |    | 1 |   |    |   |    |

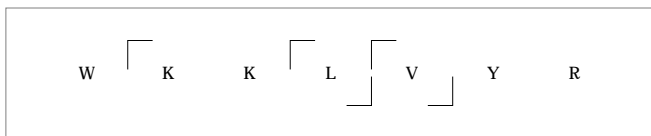

dbValid true NISIVVSTR PHOS(1) 2. 536. -1.22392 4.93161 100. ? 2970.  
 S\_Acido\_new%gi|68566543|gb|AAY79472.1| NISIVVSTR%:::::::PHOS::%sample\_2%cmpd\_1595

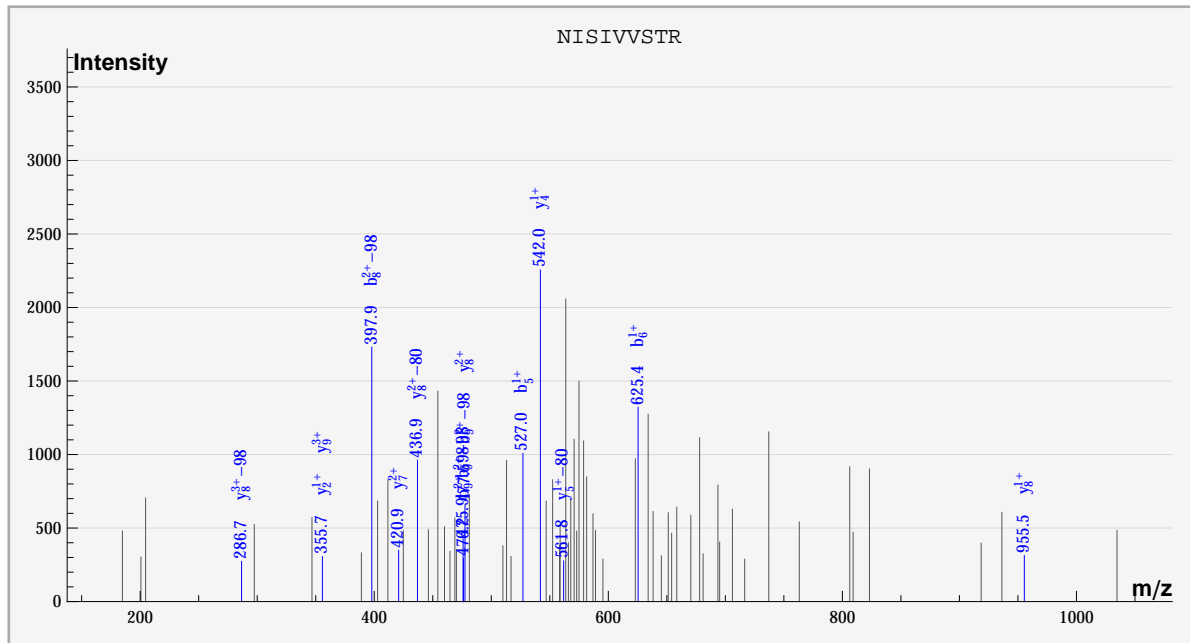

|   | # | b | b* | # | y | y* | P | P* |
|---|---|---|----|---|---|----|---|----|
| N | 1 |   |    |   |   |    |   | ✓  |
| I | 2 |   |    | 8 | ✓ | ✓  |   |    |
| S | 3 |   |    | 7 | ✓ |    |   |    |
| I | 4 |   |    | 6 |   |    |   |    |
| V | 5 | ✓ |    | 5 |   | ✓  |   |    |
| V | 6 | ✓ |    | 4 | ✓ |    |   |    |
| S | 7 |   |    | 3 |   |    |   |    |
| T | 8 |   | ✓  | 2 | ✓ |    |   |    |
| R | 9 |   | ✓  | 1 |   |    |   |    |

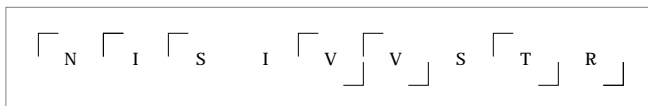

dbValid true DLSLAEQGR PHOS(1) 2. 536. -1.26031 4.9384 100. ? 3138.  
 S\_Acido\_new%gi|68567103|gb|AAy80032.1| DLSLAEQGR%:::PHOS:::sample\_2%cmpd\_1750

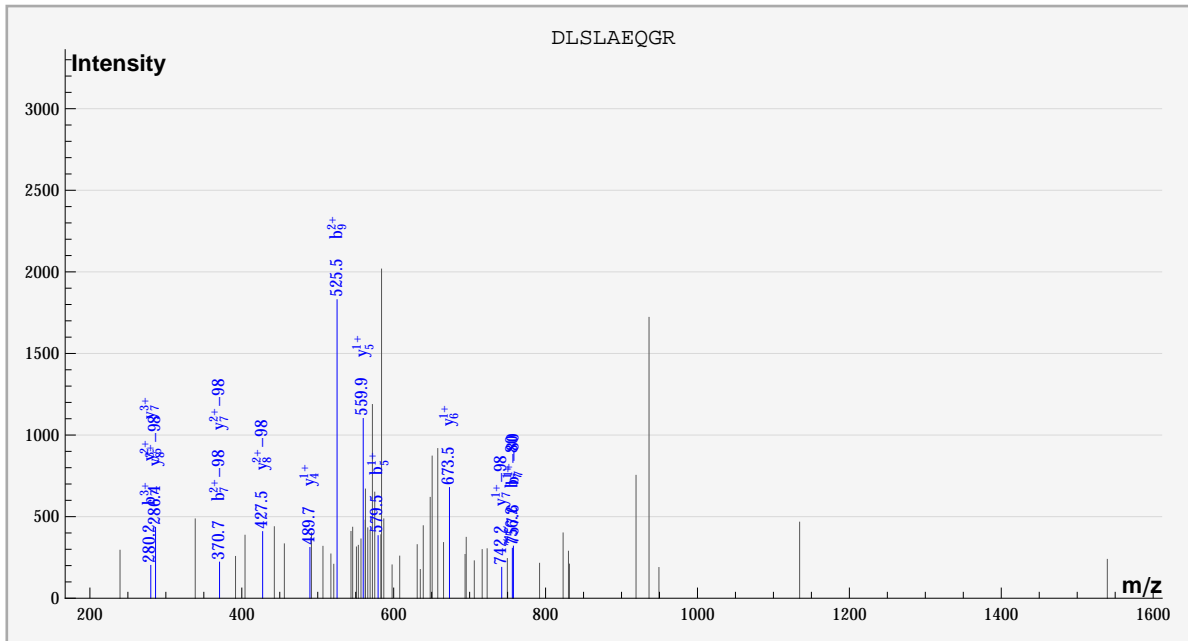

|   | # | b | b* | # | y | y* | P | P* |
|---|---|---|----|---|---|----|---|----|
| D | 1 |   |    |   |   |    |   |    |
| L | 2 |   |    | 8 |   | ✓  |   |    |
| S | 3 |   |    | 7 | ✓ | ✓  |   |    |
| L | 4 |   |    | 6 | ✓ |    |   |    |
| A | 5 | ✓ |    | 5 | ✓ |    |   |    |
| E | 6 |   |    | 4 | ✓ |    |   |    |
| Q | 7 | ✓ | ✓  | 3 |   |    |   |    |
| G | 8 |   |    | 2 |   |    |   |    |
| R | 9 | ✓ |    | 1 |   |    |   |    |

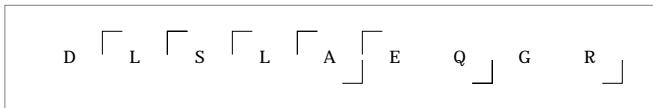

dbValid true KYLELAKK PHOS(1) 2. 536. 0.793732 4.95097 100. ? 5316.  
 S\_Acido\_new%gi|68568319|gb|AAY81248.1| KYLELAKK%::PHOS:::sample\_2%compd\_3727

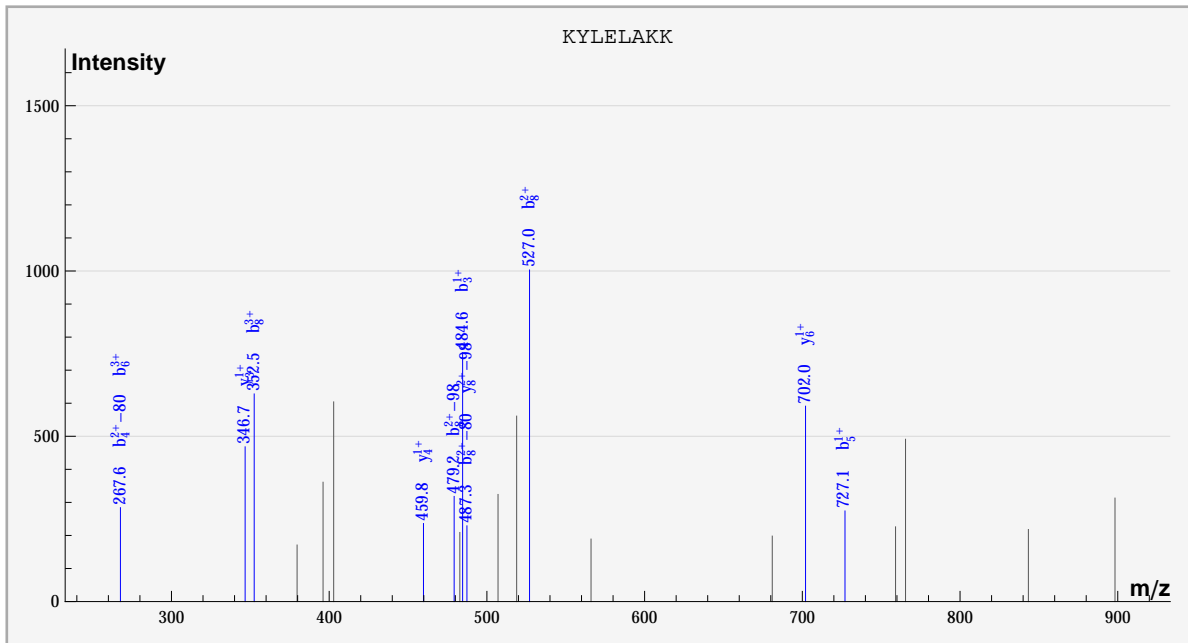

|   | # | b | b* | # | y | y* | P | P* |
|---|---|---|----|---|---|----|---|----|
| K | 1 |   |    |   |   |    |   | ✓  |
| Y | 2 |   |    | 7 |   |    |   |    |
| L | 3 | ✓ |    | 6 | ✓ |    |   |    |
| E | 4 |   | ✓  | 5 |   |    |   |    |
| L | 5 | ✓ |    | 4 | ✓ |    |   |    |
| A | 6 | ✓ |    | 3 | ✓ |    |   |    |
| K | 7 |   |    | 2 |   |    |   |    |
| K | 8 | ✓ | ✓  | 1 |   |    |   |    |

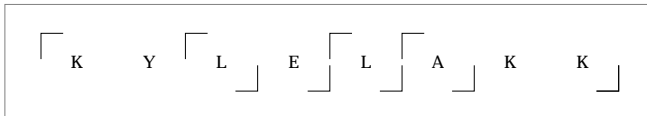

dbValid true MELIETTR PHOS(1) 2. 537. -0.259153 5.11052 100. ? 1188.  
 S\_Acido\_new%gi|68567628|gb|AAY80557.1| MELIETTR%:::::PHOS:::sample\_2%compd\_3756

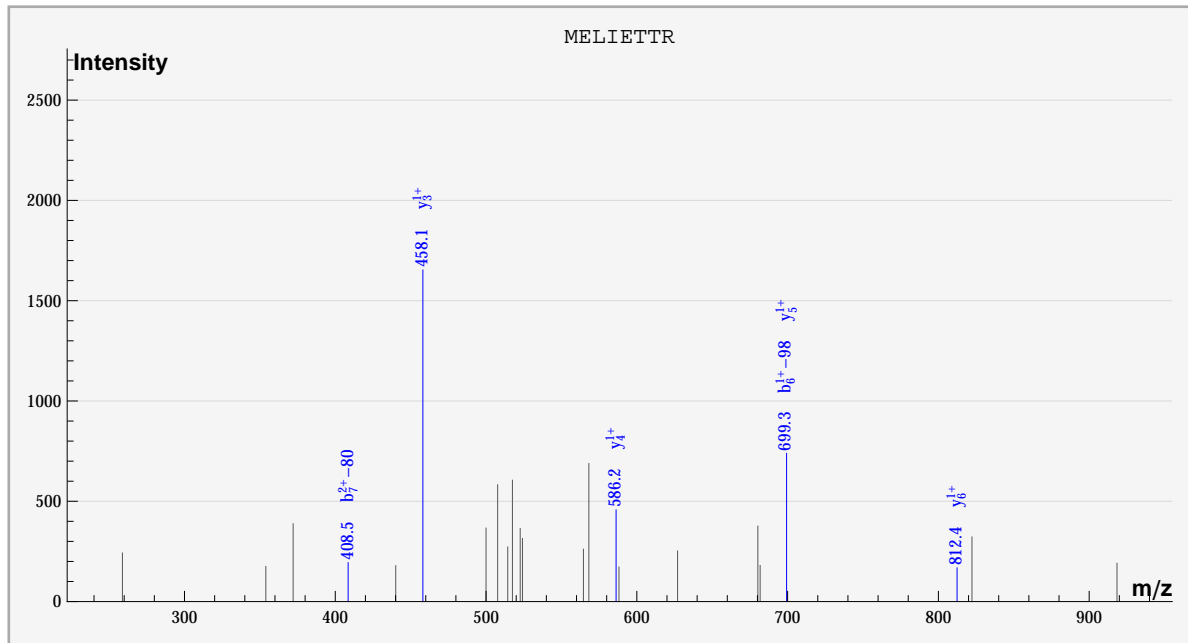

|   | # | b | b* | # | y | y* | P | P* |
|---|---|---|----|---|---|----|---|----|
| M | 1 |   |    |   |   |    |   |    |
| E | 2 |   |    | 7 |   |    |   |    |
| L | 3 |   |    | 6 | ✓ |    |   |    |
| I | 4 |   |    | 5 | ✓ |    |   |    |
| E | 5 |   |    | 4 | ✓ |    |   |    |
| T | 6 | ✓ |    | 3 | ✓ |    |   |    |
| T | 7 | ✓ |    | 2 |   |    |   |    |
| R | 8 |   |    | 1 |   |    |   |    |

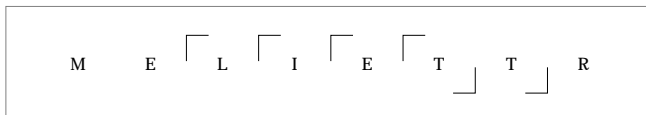

dbValid true WKKLVYR PHOS(1) 2. 537. -0.211213 5.33323 100. ? 1620.  
 S\_Acido\_new%gi|68568073|gb|AAY81002.1| WKKLVYR%:::::PHOS::%sample\_3%cmpd\_357

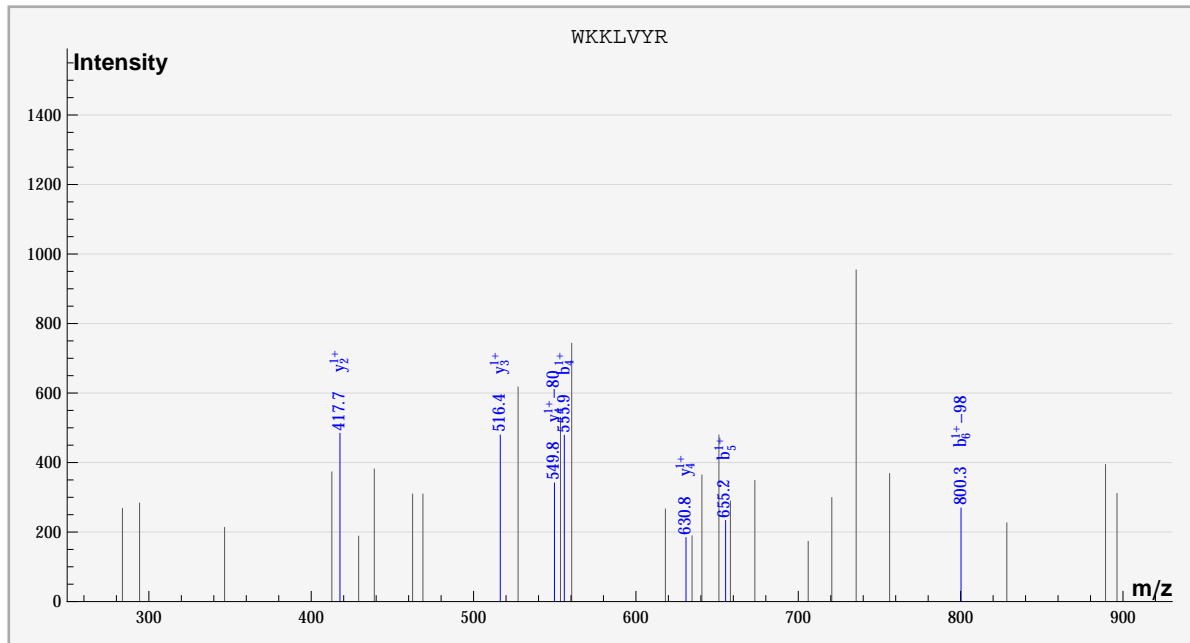

|   | # | b | b* | # | y | y* | P | P* |
|---|---|---|----|---|---|----|---|----|
| W | 1 |   |    |   |   |    |   |    |
| K | 2 |   |    | 6 |   |    |   |    |
| K | 3 |   |    | 5 |   |    |   |    |
| L | 4 | ✓ |    | 4 | ✓ | ✓  |   |    |
| V | 5 | ✓ |    | 3 | ✓ |    |   |    |
| Y | 6 |   | ✓  | 2 | ✓ |    |   |    |
| R | 7 |   |    | 1 |   |    |   |    |

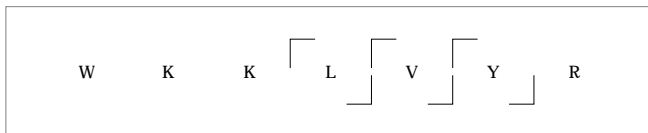

dbValid true LQEISKGSK PHOS(1) 2. 537. -1.73192 5.03696 100. ? 1884.  
 S\_Acido\_new%gi|68567611|gb|AAY80540.1| LQEISKGSK%:::::::PHOS::%sample\_2%cmpd\_602

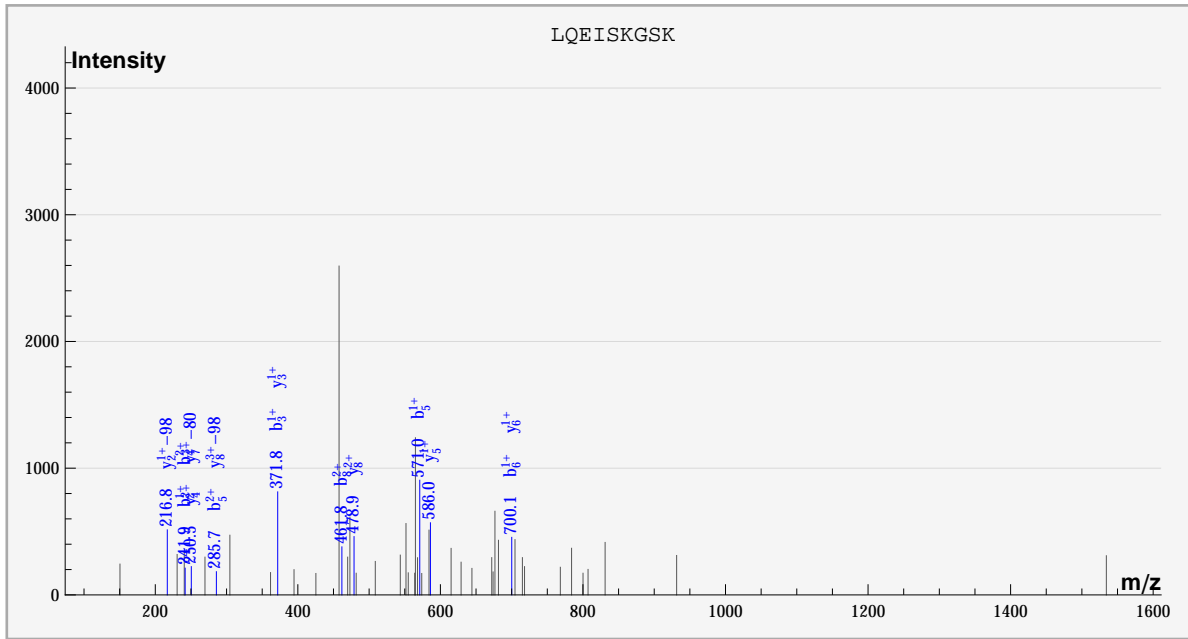

|   | # | b | b* | # | y | y* | P | P* |
|---|---|---|----|---|---|----|---|----|
| L | 1 |   |    |   |   |    |   |    |
| Q | 2 | ✓ |    | 8 | ✓ | ✓  |   |    |
| E | 3 | ✓ |    | 7 |   | ✓  |   |    |
| I | 4 | ✓ |    | 6 | ✓ |    |   |    |
| S | 5 | ✓ |    | 5 | ✓ |    |   |    |
| K | 6 | ✓ |    | 4 | ✓ |    |   |    |
| G | 7 |   |    | 3 | ✓ |    |   |    |
| S | 8 | ✓ |    | 2 |   | ✓  |   |    |
| K | 9 |   |    | 1 |   |    |   |    |

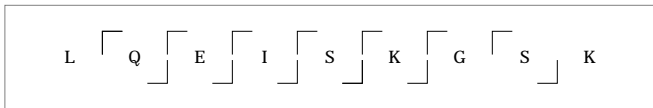

dbValid true HWGSLFSR PHOS(1) 2. 537. -1.76562 5.27122 100. ? 2814.  
 S\_Acido\_new%gi68566782|gb|AAY79711.1| HWGSLFSR%:::::PHOS::%sample\_2%cmpd\_1452

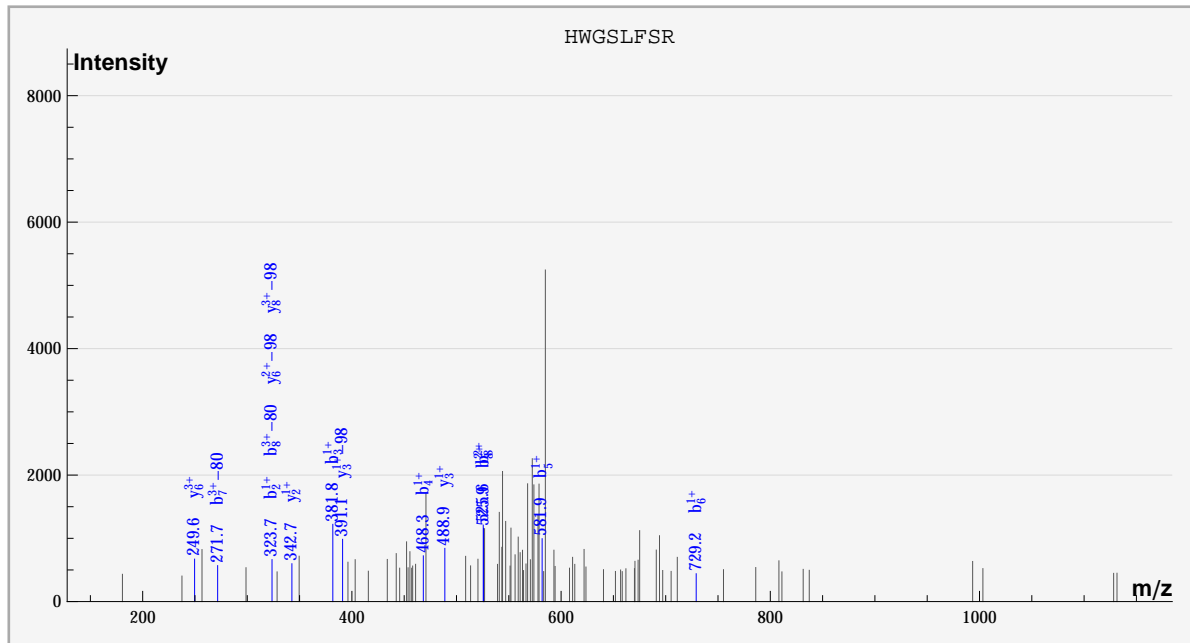

|   | # | b | b* | # | y | y* | P | P* |
|---|---|---|----|---|---|----|---|----|
| H | 1 |   |    |   |   |    |   | ✓  |
| W | 2 | ✓ |    | 7 |   |    |   |    |
| G | 3 | ✓ |    | 6 | ✓ | ✓  |   |    |
| S | 4 | ✓ |    | 5 |   |    |   |    |
| L | 5 | ✓ |    | 4 |   |    |   |    |
| F | 6 | ✓ |    | 3 | ✓ | ✓  |   |    |
| S | 7 |   | ✓  | 2 | ✓ |    |   |    |
| R | 8 | ✓ | ✓  | 1 |   |    |   |    |

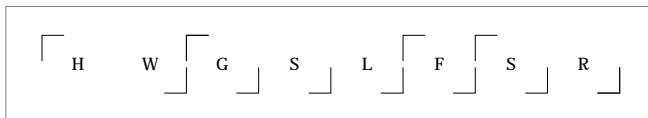



dbValid true LLYEKAKK PHOS(1) 2. 537. -0.206268 4.95286 100. ? 3834.  
 S\_Acido\_new%gi|68567441|gb|AAY80370.1| LLYEKAKK%:::PHOS:::sample\_2%compd\_2393

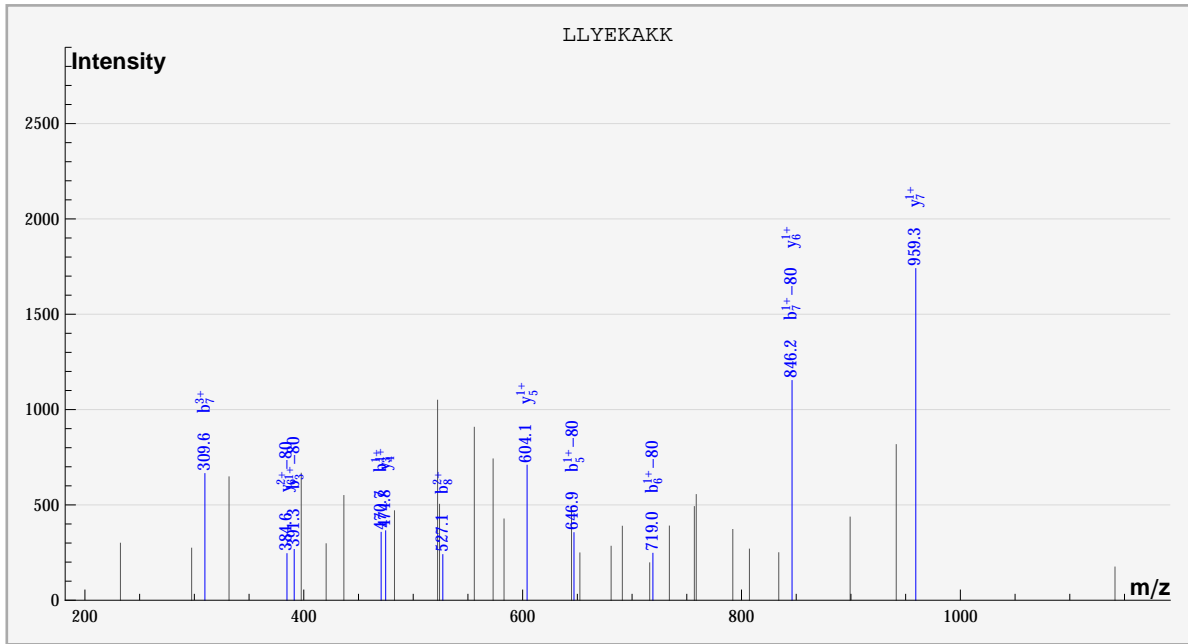

|   | # | b | b* | # | y | y* | P | P* |
|---|---|---|----|---|---|----|---|----|
| L | 1 |   |    |   |   |    |   |    |
| L | 2 |   |    | 7 | ✓ |    |   |    |
| Y | 3 | ✓ | ✓  | 6 | ✓ | ✓  |   |    |
| E | 4 |   |    | 5 | ✓ |    |   |    |
| K | 5 |   | ✓  | 4 | ✓ |    |   |    |
| A | 6 |   | ✓  | 3 |   |    |   |    |
| K | 7 | ✓ | ✓  | 2 |   |    |   |    |
| K | 8 | ✓ |    | 1 |   |    |   |    |

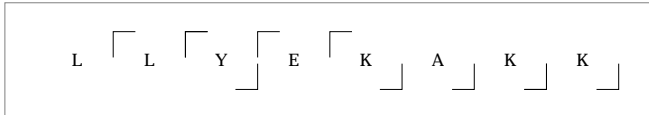

dbValid true DQGEAYANK PHOS(1) 2. 538. 0.208222 4.93449 100. ? 1134.  
 S\_Acido\_new%gi|68567539|gb|AA80468.1| DQGEAYANK%:::PHOS:::sample\_0%cmpd\_3742

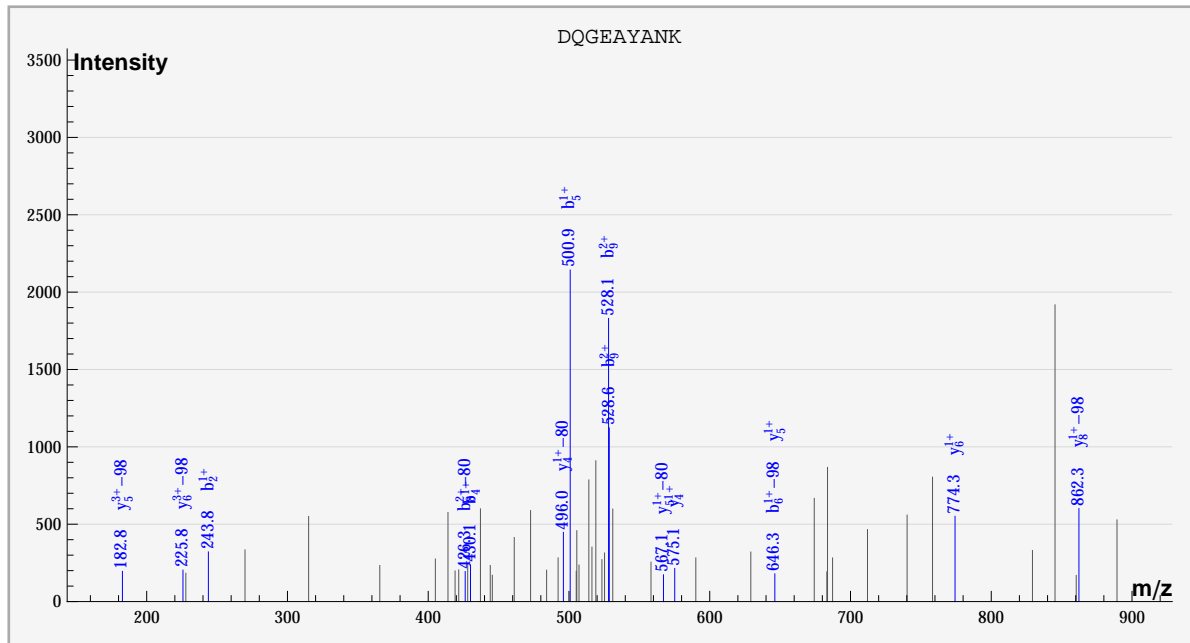

|   | # | b | b* | # | y | y* | P | P* |
|---|---|---|----|---|---|----|---|----|
| D | 1 |   |    |   |   |    |   |    |
| Q | 2 | ✓ |    | 8 |   | ✓  |   |    |
| G | 3 |   |    | 7 |   |    |   |    |
| E | 4 | ✓ |    | 6 | ✓ | ✓  |   |    |
| A | 5 | ✓ |    | 5 | ✓ | ✓  |   |    |
| Y | 6 |   | ✓  | 4 | ✓ | ✓  |   |    |
| A | 7 |   |    | 3 |   |    |   |    |
| N | 8 |   | ✓  | 2 |   |    |   |    |
| K | 9 | ✓ |    | 1 |   |    |   |    |

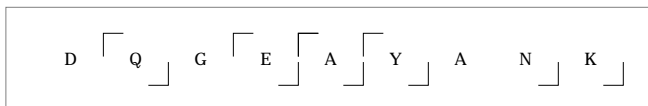

dbValid true KIASISLRLLAEK PHOS(1) 3. 538. -1.02569 5.04375 100. ? 1650.  
 S\_Acido\_new%gi|68568359|gb|AAy81288.1| KIASISLRLLAEK%:::PHOS:::sample\_0%compd\_387

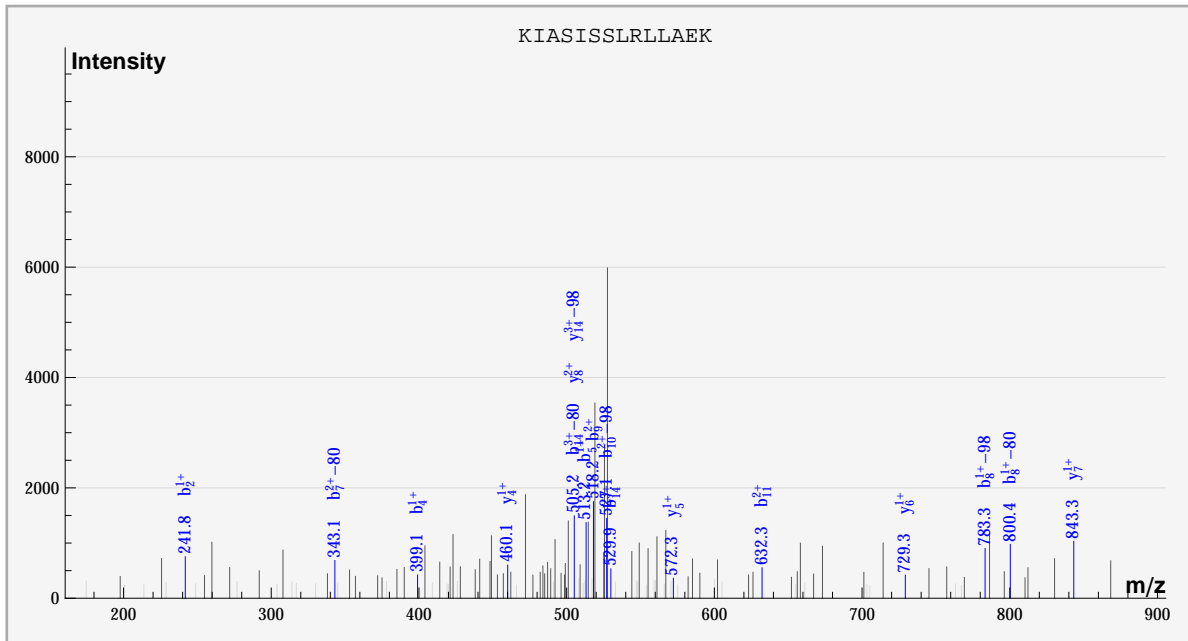

|   | #  | b | b* | #  | y | y* | P | P* |
|---|----|---|----|----|---|----|---|----|
| K | 1  |   |    |    |   |    |   | ✓  |
| I | 2  | ✓ |    | 13 |   |    |   |    |
| A | 3  |   |    | 12 |   |    |   |    |
| S | 4  | ✓ |    | 11 |   |    |   |    |
| I | 5  | ✓ |    | 10 |   |    |   |    |
| S | 6  |   |    | 9  |   |    |   |    |
| S | 7  |   | ✓  | 8  | ✓ |    |   |    |
| L | 8  |   | ✓  | 7  | ✓ |    |   |    |
| R | 9  | ✓ |    | 6  | ✓ |    |   |    |
| L | 10 |   | ✓  | 5  | ✓ |    |   |    |
| L | 11 | ✓ |    | 4  | ✓ |    |   |    |
| A | 12 |   |    | 3  |   |    |   |    |
| E | 13 |   |    | 2  |   |    |   |    |
| K | 14 | ✓ | ✓  | 1  |   |    |   |    |

[ K I A S I S S L R L L A E K ]

dbValid true WLFSISSR PHOS(1) 2. 538. 0.252237 5.13105 100. ? 1656.  
 S\_Acido\_new%gi|68568487|gb|AAY81416.1| WLFSISSR%:::PHOS:::sample\_2%compd\_393

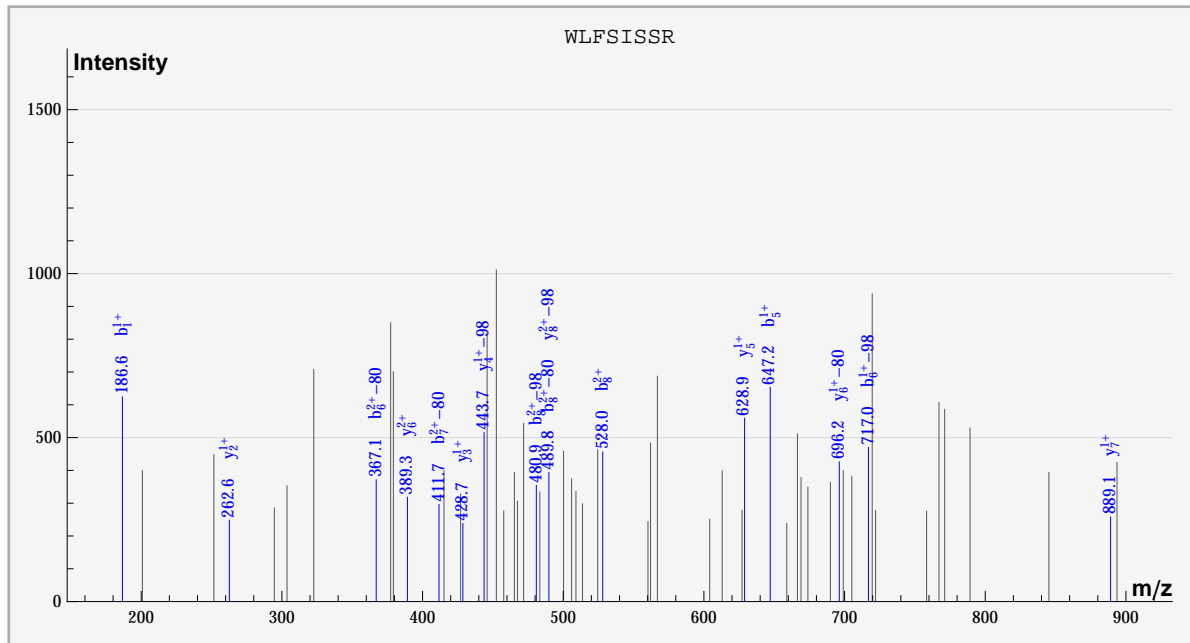

|   | # | b | b* | # | y | y* | P | P* |
|---|---|---|----|---|---|----|---|----|
| W | 1 | ✓ |    |   |   |    |   | ✓  |
| L | 2 |   |    | 7 | ✓ |    |   |    |
| F | 3 |   |    | 6 | ✓ | ✓  |   |    |
| S | 4 |   |    | 5 | ✓ |    |   |    |
| I | 5 | ✓ |    | 4 |   | ✓  |   |    |
| S | 6 |   | ✓  | 3 | ✓ |    |   |    |
| S | 7 |   | ✓  | 2 | ✓ |    |   |    |
| R | 8 | ✓ | ✓  | 1 |   |    |   |    |

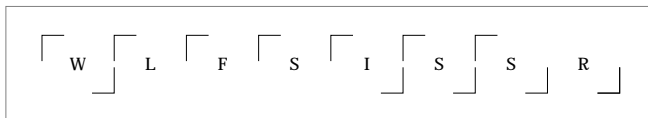

dbValid true YVDARYK PHOS(2) 2. 538. -0.293538 5.04302 100. ? 354.

S\_Acido\_new%gi|68566856|gb|AAY79785.1| YVDARYK%:PHOS:::PHOS::%sample\_2%compd\_2073

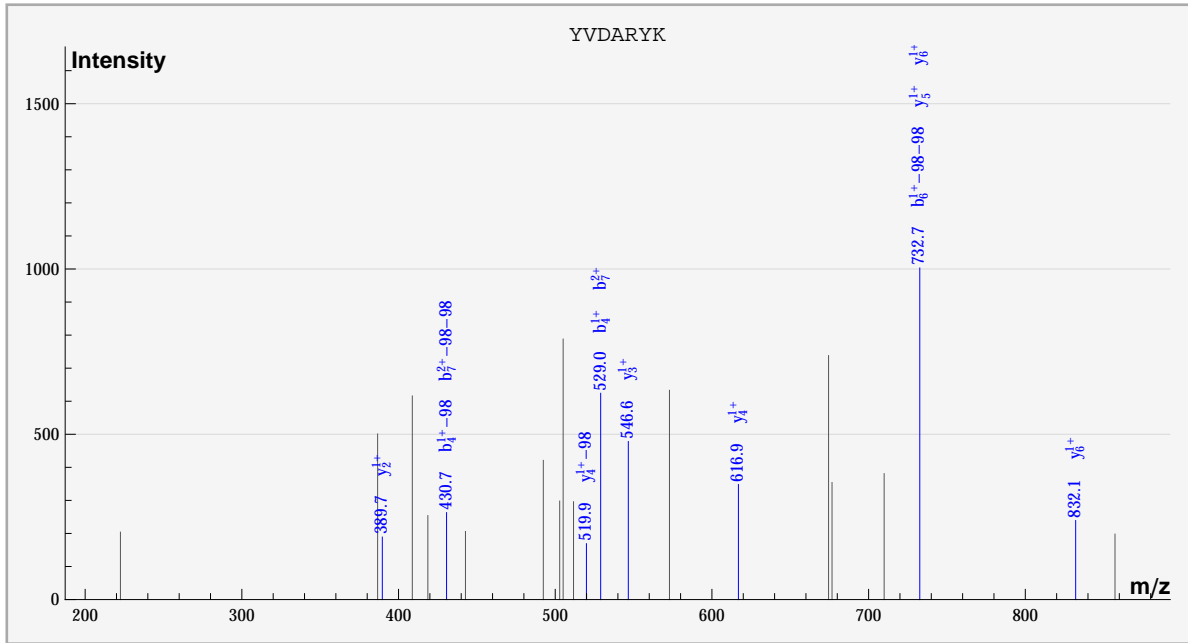

|   | # | b | b* | # | y | y* | P | P* |
|---|---|---|----|---|---|----|---|----|
| Y | 1 |   |    |   |   |    |   |    |
| V | 2 |   |    | 6 | ✓ | ✓  |   |    |
| D | 3 |   |    | 5 | ✓ |    |   |    |
| A | 4 | ✓ | ✓  | 4 | ✓ | ✓  |   |    |
| R | 5 |   |    | 3 | ✓ |    |   |    |
| Y | 6 |   | ✓  | 2 | ✓ |    |   |    |
| K | 7 | ✓ | ✓  | 1 |   |    |   |    |

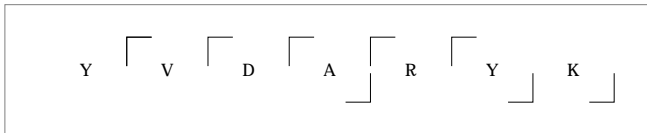

dbValid true WSMAKLIK Oxidation\_M(1),PHOS(1) 2. 538. -1.23334 5.0029 100. ? 3654.

S\_Acido\_new%gil68567552|gb|AAY80481.1| WSMAKLIK%::PHOS:Oxidation\_M:::::%sample\_2%compd\_2229

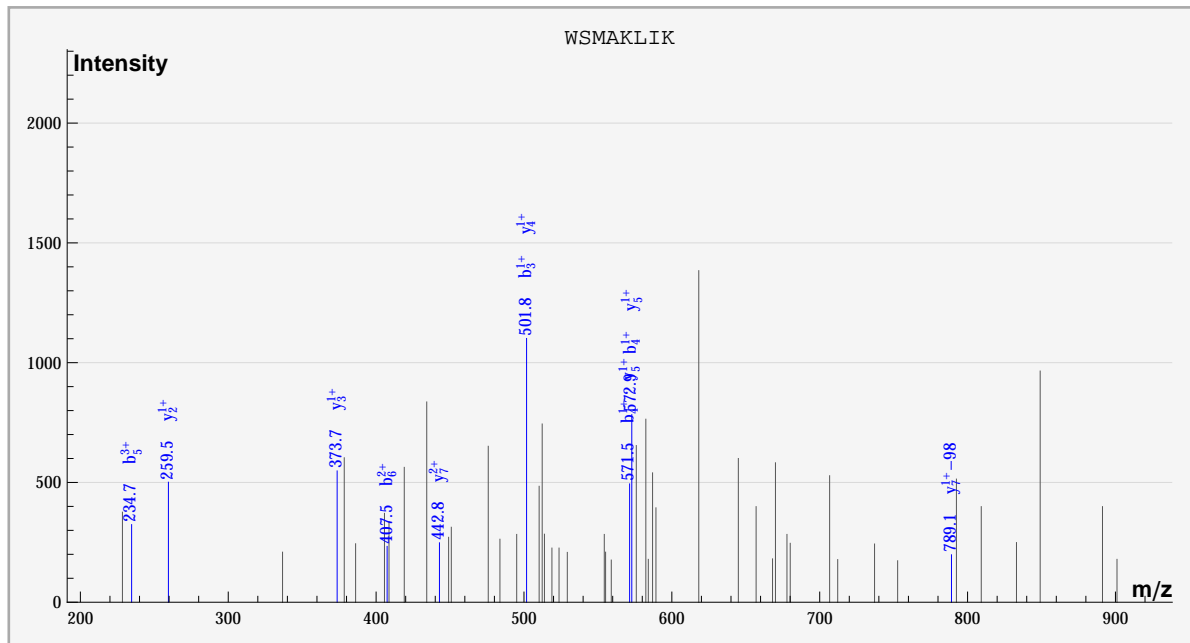

|   | # | b | b* | # | y | y* | P | P* |
|---|---|---|----|---|---|----|---|----|
| W | 1 |   |    |   |   |    |   |    |
| S | 2 |   |    | 7 | ✓ | ✓  |   |    |
| M | 3 | ✓ |    | 6 |   |    |   |    |
| A | 4 | ✓ |    | 5 | ✓ |    |   |    |
| K | 5 | ✓ |    | 4 | ✓ |    |   |    |
| L | 6 | ✓ |    | 3 | ✓ |    |   |    |
| I | 7 |   |    | 2 | ✓ |    |   |    |
| K | 8 |   |    | 1 |   |    |   |    |

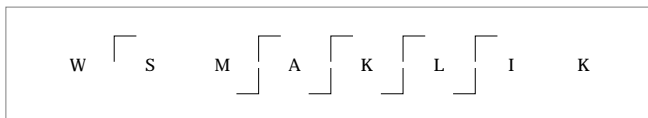

dbValid true LNYVVTRK PHOS(1) 2. 538. -1.21884 4.95669 100. ? 3846.

S\_Acido\_new%gi|68567871|gb|AAY80800.1| LNYVVTRK%:::PHOS:::sample\_2%cmpd\_2405

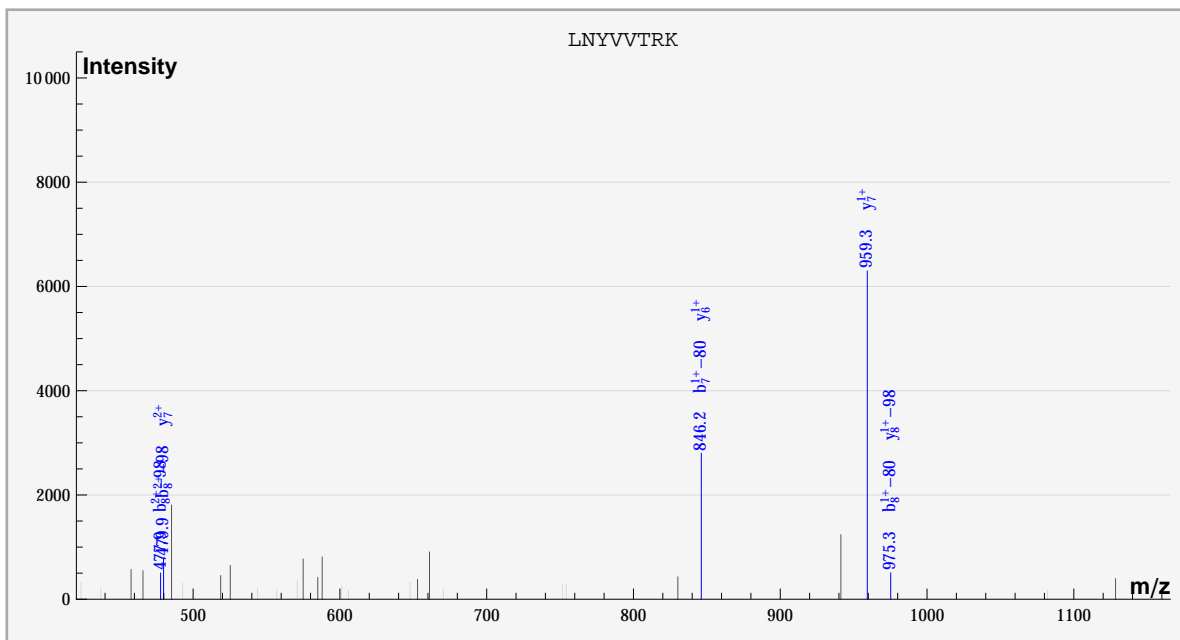

|   | # | b | b* | # | y | y* | P | P* |
|---|---|---|----|---|---|----|---|----|
| L | 1 |   |    |   |   |    |   | ✓  |
| N | 2 |   |    | 7 | ✓ |    |   |    |
| Y | 3 |   |    | 6 | ✓ |    |   |    |
| V | 4 |   |    | 5 |   |    |   |    |
| V | 5 |   |    | 4 |   |    |   |    |
| T | 6 |   |    | 3 |   |    |   |    |
| R | 7 | ✓ |    | 2 |   |    |   |    |
| K | 8 | ✓ |    | 1 |   |    |   |    |

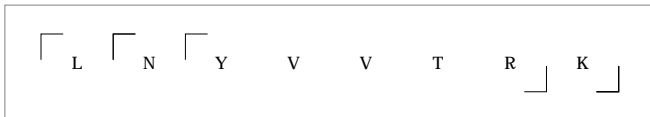

dbValid true ELTVLTYR PHOS(1) 2. 539. -1.23482 5.18244 100. ? 1326.  
 S\_Acido\_new%gi|68566704|gb|AAY79633.1| ELTVLTYR%:::PHOS:::sample\_0%compd\_104

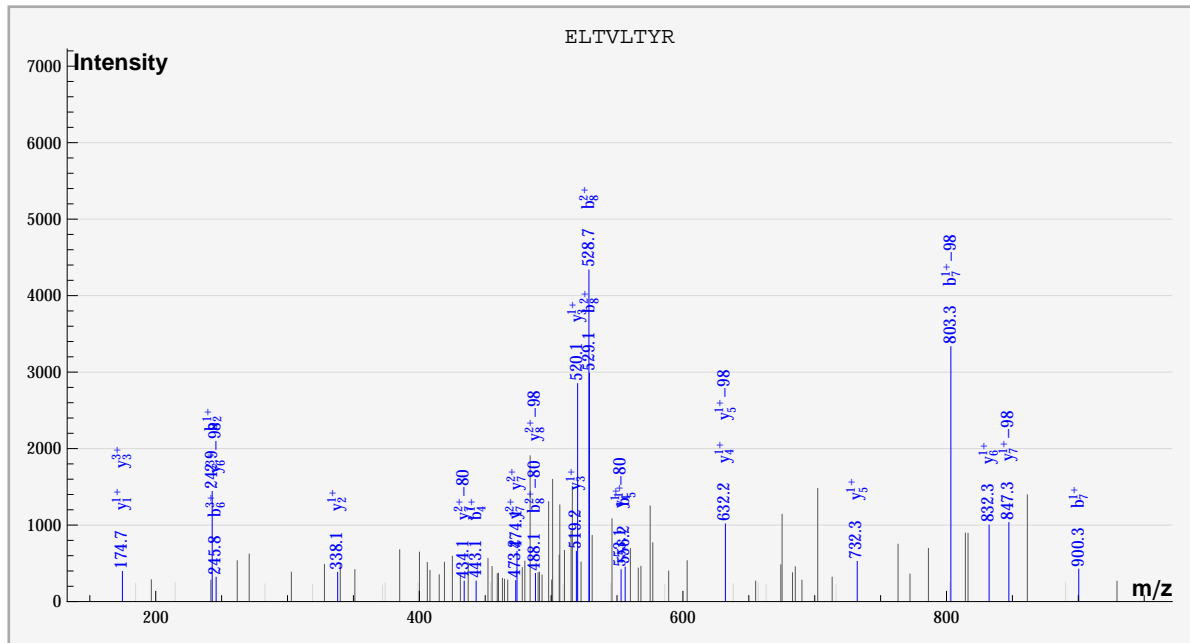

|   | # | b | b* | # | y | y* | P | P* |
|---|---|---|----|---|---|----|---|----|
| E | 1 |   |    |   |   |    |   | ✓  |
| L | 2 | ✓ |    | 7 | ✓ | ✓  |   |    |
| T | 3 |   |    | 6 | ✓ | ✓  |   |    |
| V | 4 | ✓ |    | 5 | ✓ | ✓  |   |    |
| L | 5 | ✓ |    | 4 | ✓ | ✓  |   |    |
| T | 6 | ✓ |    | 3 | ✓ |    |   |    |
| Y | 7 | ✓ | ✓  | 2 | ✓ |    |   |    |
| R | 8 | ✓ | ✓  | 1 | ✓ |    |   |    |

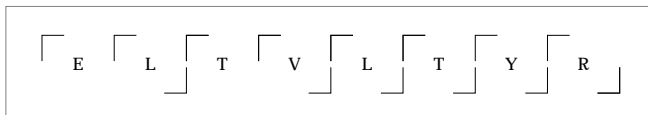



dbValid true YQLF TSR PHOS(2) 2. 539. -1.29353 4.9193 100. ? 1458.  
 S\_Acido\_new%gil68566987|gb|AAY79916.1| YQLF TSR%:PHOS:::PHOS:::%sample\_0%cmpd\_218

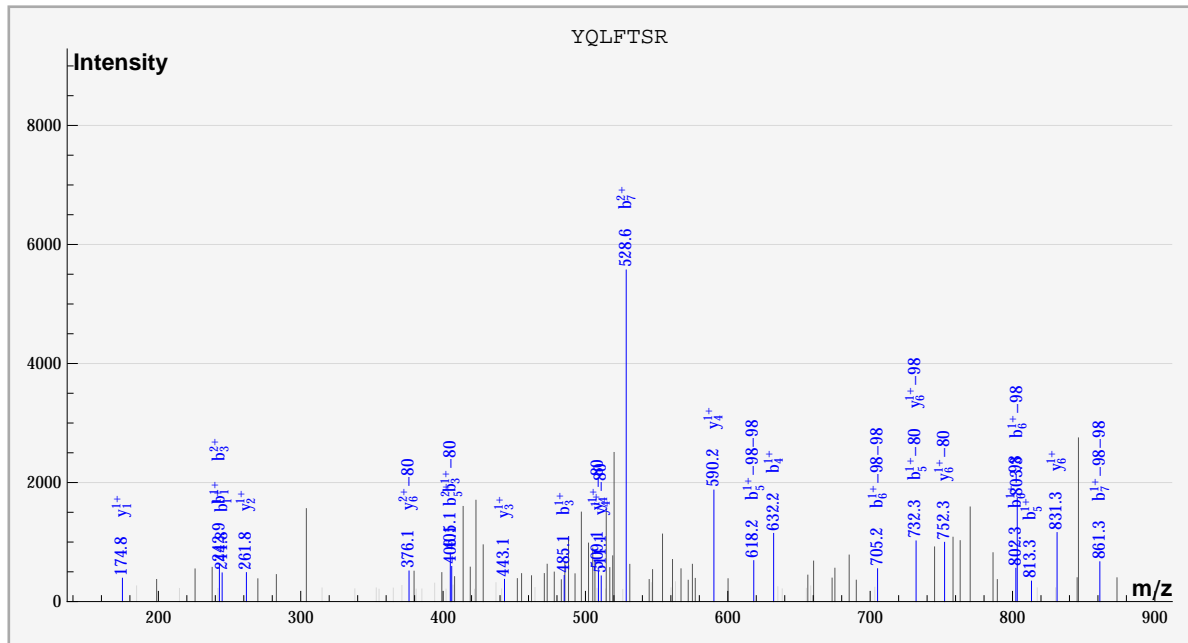

|   | # | b | b* | # | y | y* | P | P* |
|---|---|---|----|---|---|----|---|----|
| Y | 1 | ✓ |    |   |   |    |   |    |
| Q | 2 |   |    | 6 | ✓ | ✓  |   |    |
| L | 3 | ✓ | ✓  | 5 |   |    |   |    |
| F | 4 | ✓ |    | 4 | ✓ | ✓  |   |    |
| T | 5 | ✓ | ✓  | 3 | ✓ |    |   |    |
| S | 6 |   | ✓  | 2 | ✓ |    |   |    |
| R | 7 | ✓ | ✓  | 1 | ✓ |    |   |    |

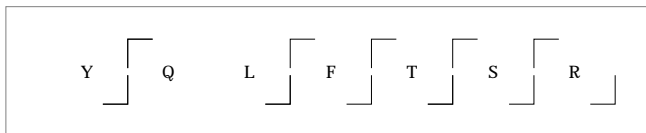

dbValid true EVYNVYK PHOS(2) 2. 539. -1.29915 4.96169 100. ? 1476.

S\_Acido\_new%gi|68566734|gb|AA79663.1| EVYNVYK%::PHOS::PHOS::sample\_2%compd\_232

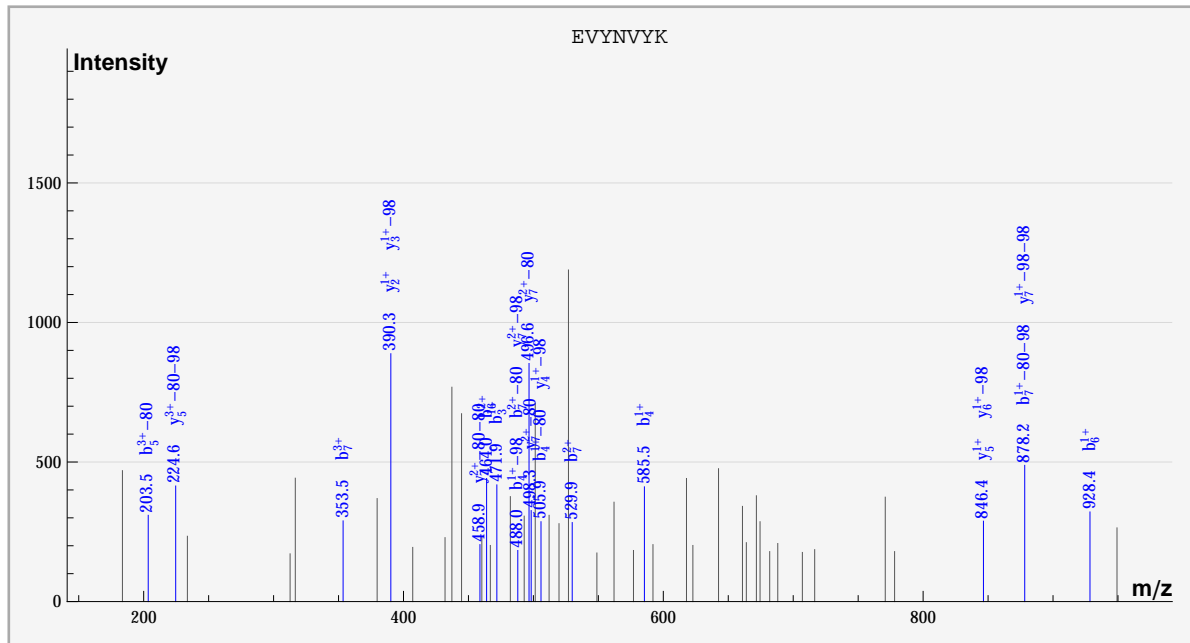

|   | # | b | b* | # | y | y* | P | P* |
|---|---|---|----|---|---|----|---|----|
| E | 1 |   |    |   |   |    |   | ✓  |
| V | 2 |   |    | 6 |   | ✓  |   |    |
| Y | 3 | ✓ |    | 5 | ✓ | ✓  |   |    |
| N | 4 | ✓ | ✓  | 4 |   | ✓  |   |    |
| V | 5 |   | ✓  | 3 |   | ✓  |   |    |
| Y | 6 | ✓ |    | 2 | ✓ |    |   |    |
| K | 7 | ✓ | ✓  | 1 |   |    |   |    |

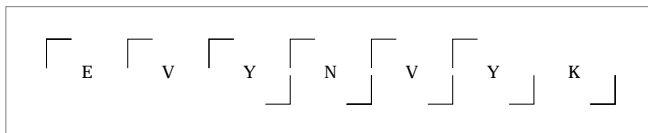

dbValid true FRLDYER PHOS(1) 2. 539. 0.739492 5.32293 100. ? 1524.

S\_Acido\_new%gi|68567362|gb|AAY80291.1| FRLDYER%:::::PHOS:::sample\_3%compd\_274

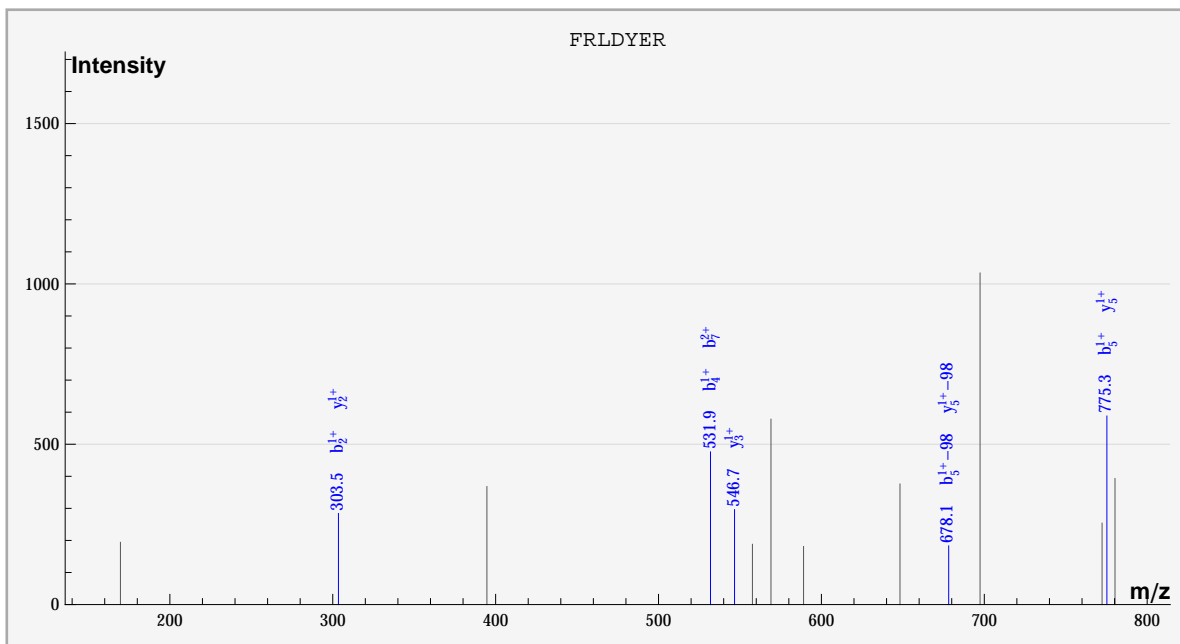

|   | # | b | b* | # | y | y* | P | P* |
|---|---|---|----|---|---|----|---|----|
| F | 1 |   |    |   |   |    |   |    |
| R | 2 | ✓ |    | 6 |   |    |   |    |
| L | 3 |   |    | 5 | ✓ | ✓  |   |    |
| D | 4 | ✓ |    | 4 |   |    |   |    |
| Y | 5 | ✓ | ✓  | 3 | ✓ |    |   |    |
| E | 6 |   |    | 2 | ✓ |    |   |    |
| R | 7 | ✓ |    | 1 |   |    |   |    |

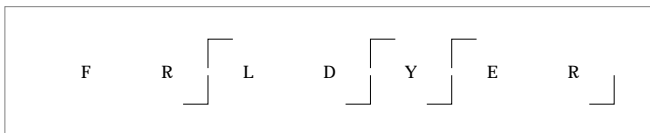

dbValid true LSSILQTR PHOS(2) 2. 539. 0.240672 4.90575 100. ? 1884.  
 S\_Acido\_new%gil68567277|gb|AAy80206.1| LSSILQTR%::PHOS%::PHOS%::sample\_2%compd\_605

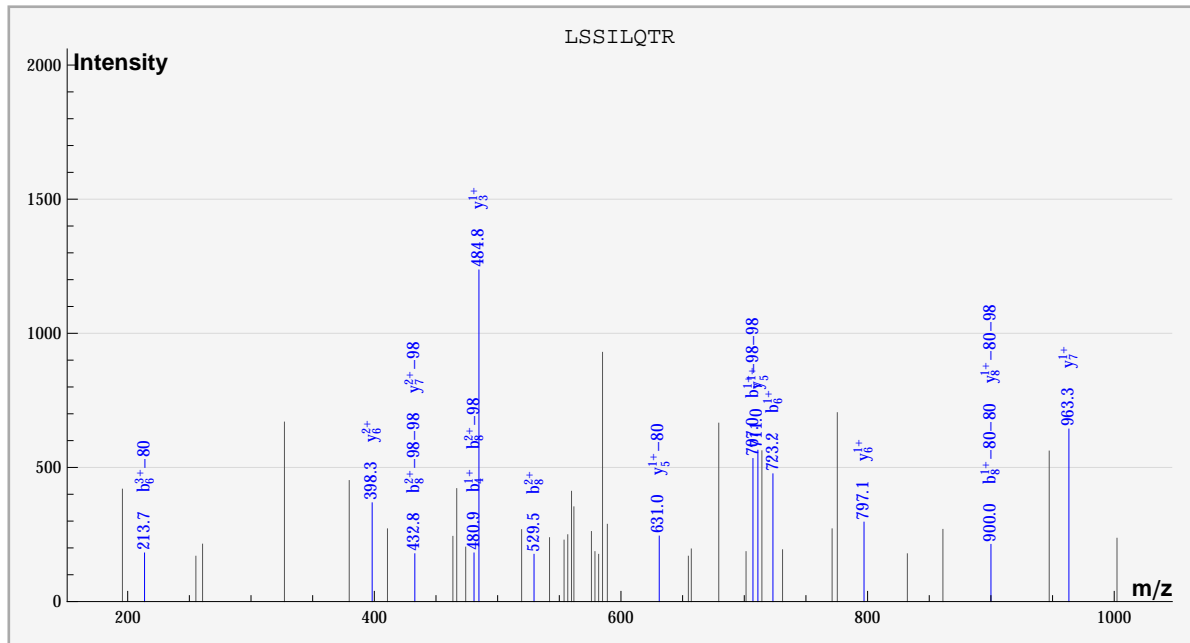

|   | # | b | b* | # | y | y* | P | P* |
|---|---|---|----|---|---|----|---|----|
| L | 1 |   |    |   |   |    |   | ✓  |
| S | 2 |   |    | 7 | ✓ | ✓  |   |    |
| S | 3 |   |    | 6 | ✓ |    |   |    |
| I | 4 | ✓ |    | 5 | ✓ | ✓  |   |    |
| L | 5 |   |    | 4 |   |    |   |    |
| Q | 6 | ✓ | ✓  | 3 | ✓ |    |   |    |
| T | 7 |   | ✓  | 2 |   |    |   |    |
| R | 8 | ✓ | ✓  | 1 |   |    |   |    |

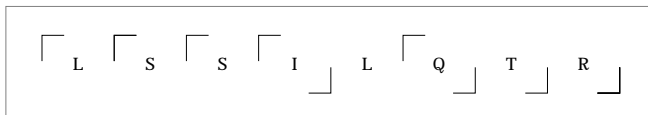

dbValid true IILSSGVPK PHOS(2) 2. 539. -1.74422 5.04092 100. ? 3234.  
 S\_Acido\_new%gii68567522|gb|AAy80451.1| IILSSGVPK%:::PHOS:PHOS:::%sample\_2%cmpd\_1842

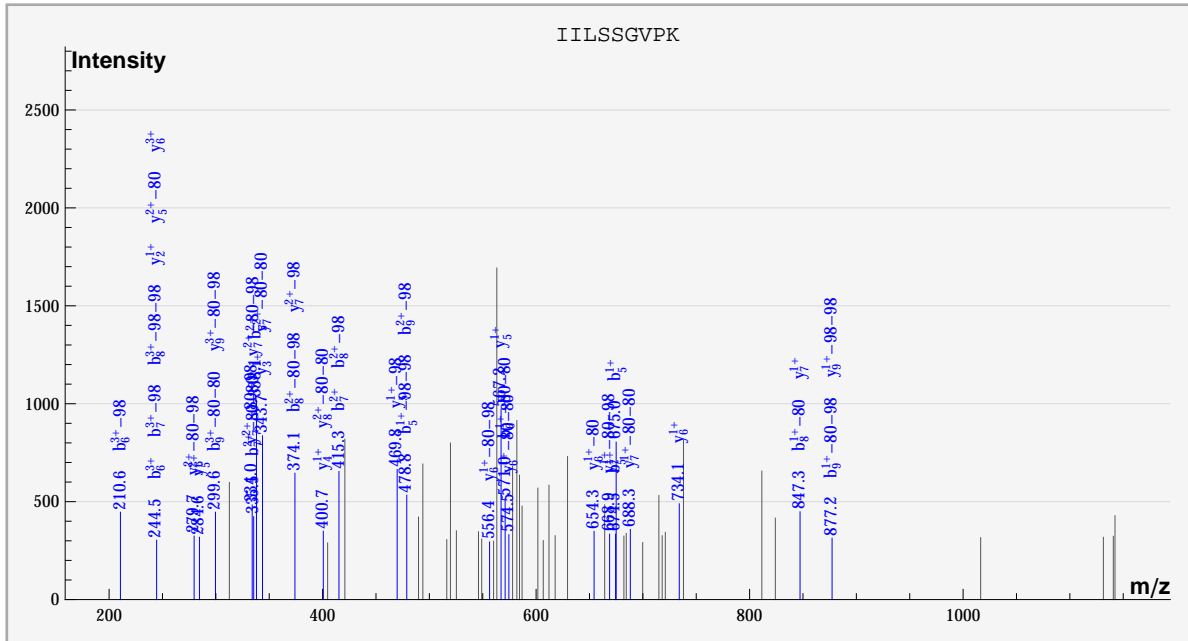

|   | # | b | b* | # | y | y* | P | P* |
|---|---|---|----|---|---|----|---|----|
| I | 1 |   |    |   |   |    |   | ✓  |
| I | 2 |   |    | 8 |   | ✓  |   |    |
| L | 3 |   |    | 7 | ✓ | ✓  |   |    |
| S | 4 |   |    | 6 | ✓ | ✓  |   |    |
| S | 5 | ✓ | ✓  | 5 | ✓ | ✓  |   |    |
| G | 6 | ✓ | ✓  | 4 | ✓ |    |   |    |
| V | 7 | ✓ | ✓  | 3 | ✓ |    |   |    |
| P | 8 |   | ✓  | 2 | ✓ |    |   |    |
| K | 9 |   | ✓  | 1 |   |    |   |    |

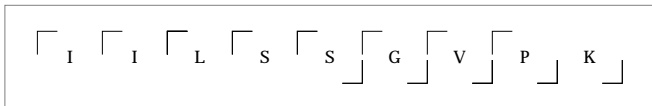

dbValid true YKGNLDKR PHOS(1) 2. 539. -1.73941 5.50695 100. ? 3630.  
 S\_Acido\_new%gi|68568071|gb|AAY81000.1| YKGNLDKR%:PHOS:::sample\_0%cmpd\_2112

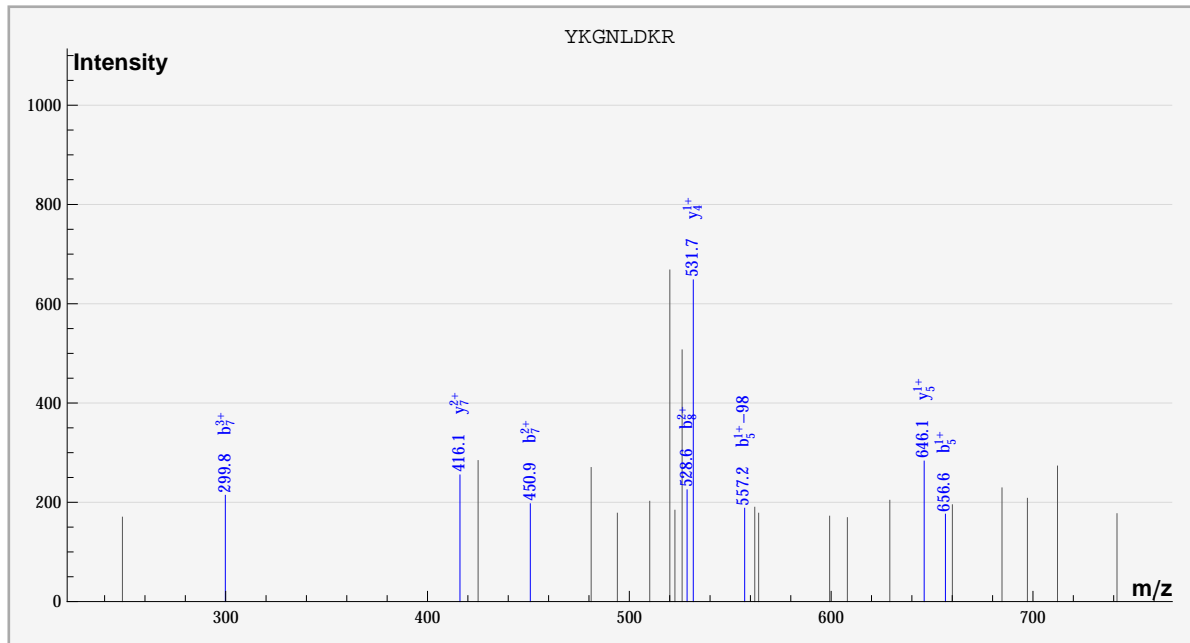

|   | # | b | b* | # | y | y* | P | P* |
|---|---|---|----|---|---|----|---|----|
| Y | 1 |   |    |   |   |    |   |    |
| K | 2 |   |    | 7 | ✓ |    |   |    |
| G | 3 |   |    | 6 |   |    |   |    |
| N | 4 |   |    | 5 | ✓ |    |   |    |
| L | 5 | ✓ | ✓  | 4 | ✓ |    |   |    |
| D | 6 |   |    | 3 |   |    |   |    |
| K | 7 | ✓ |    | 2 |   |    |   |    |
| R | 8 | ✓ |    | 1 |   |    |   |    |

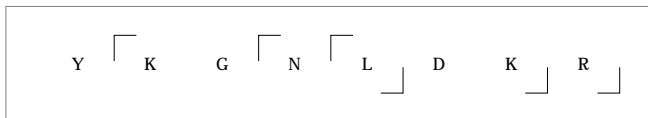

dbValid true KIIRLTEK PHOS(1) 2. 539. 1.81246 4.88456 100. ? 3798.  
 S\_Acido\_new%gi|68566957|gb|AAY79886.1| KIIRLTEK%:::::PHOS:::sample\_2%cmpd\_2363

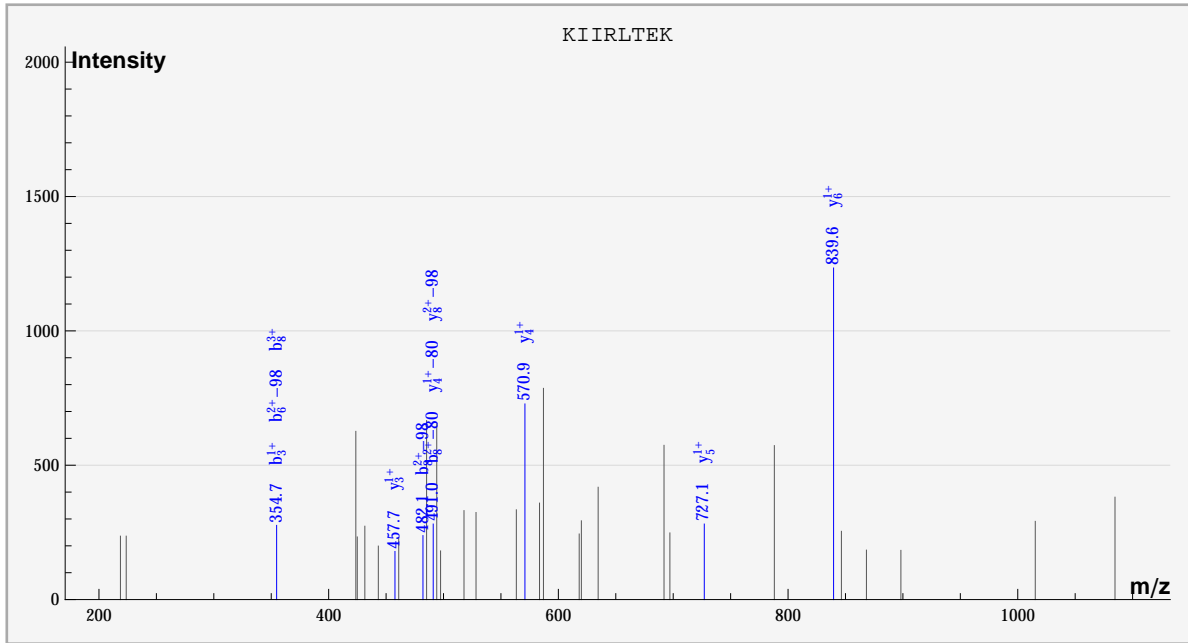

|   | # | b | b* | # | y | y* | P | P* |
|---|---|---|----|---|---|----|---|----|
| K | 1 |   |    |   |   |    |   | ✓  |
| I | 2 |   |    | 7 |   |    |   |    |
| I | 3 | ✓ |    | 6 | ✓ |    |   |    |
| R | 4 |   |    | 5 | ✓ |    |   |    |
| L | 5 |   |    | 4 | ✓ | ✓  |   |    |
| T | 6 | ✓ |    | 3 | ✓ |    |   |    |
| E | 7 |   |    | 2 |   |    |   |    |
| K | 8 | ✓ | ✓  | 1 |   |    |   |    |

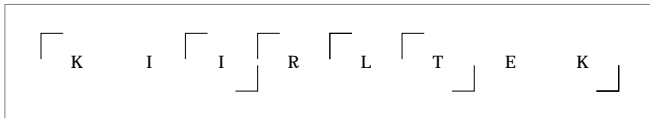

dbValid true ELFSSTR PHOS(3) 2. 541. -0.834028 5.42301 100. ? 1224.  
 S\_Acido\_new%gi|68568120|gb|AAY81049.1| ELFSSTR%:::PHOS:PHOS:PHOS::%sample\_1%compd\_14

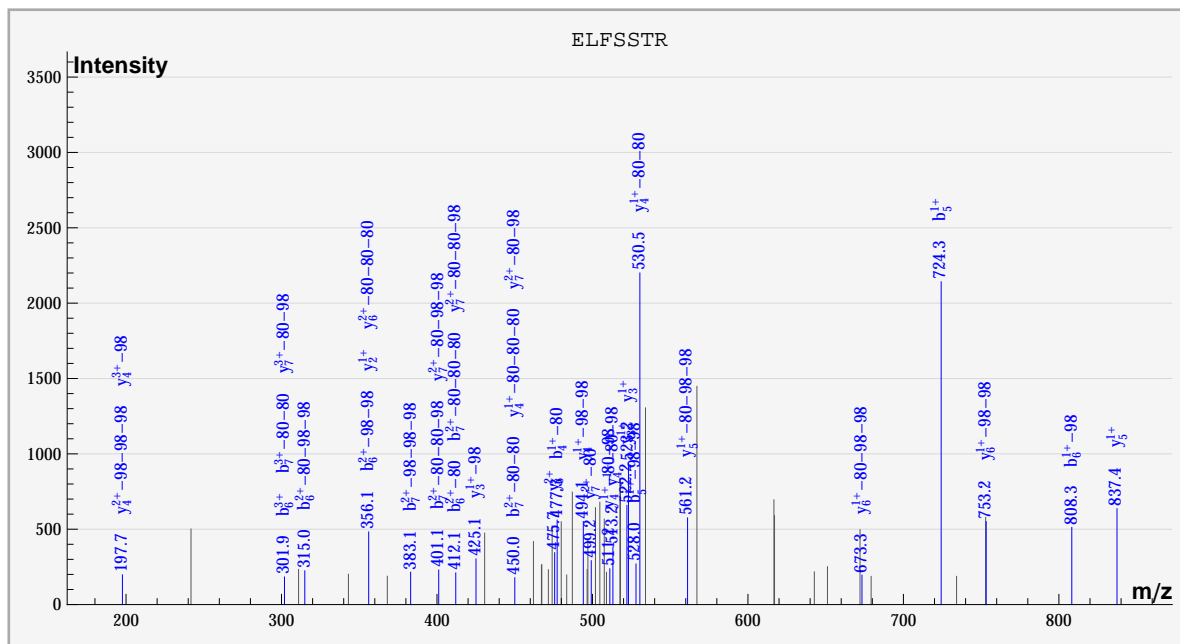

|   | # | b | b* | # | y | y* | P | P* |
|---|---|---|----|---|---|----|---|----|
| E | 1 |   |    |   |   |    |   | ✓  |
| L | 2 |   |    | 6 | ✓ | ✓  |   |    |
| F | 3 |   |    | 5 | ✓ | ✓  |   |    |
| S | 4 | ✓ | ✓  | 4 | ✓ | ✓  |   |    |
| S | 5 | ✓ | ✓  | 3 | ✓ | ✓  |   |    |
| T | 6 | ✓ | ✓  | 2 | ✓ |    |   |    |
| R | 7 |   | ✓  | 1 |   |    |   |    |

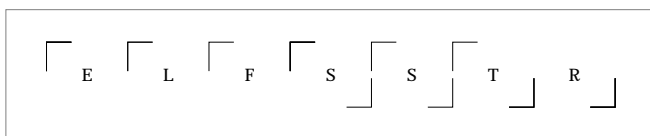



dbValid true YTHVFKK PHOS(2) 2. 541. 0.727197 4.96129 100. ? 1650.  
 S\_Acido\_new%gil68567545|gb|AA80474.1| YTHVFKK%:PHOS:PHOS:.....%sample\_1%compd\_379

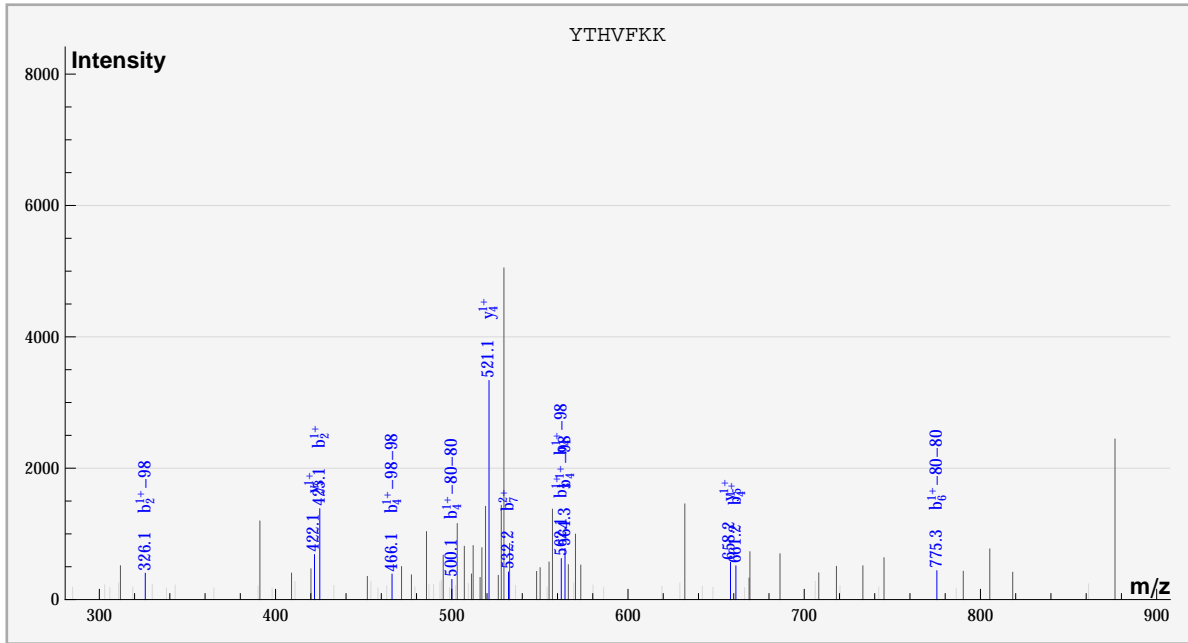

|   | # | b | b* | # | y | y* | P | P* |
|---|---|---|----|---|---|----|---|----|
| Y | 1 |   |    |   |   |    |   |    |
| T | 2 | ✓ | ✓  | 6 |   |    |   |    |
| H | 3 | ✓ |    | 5 | ✓ |    |   |    |
| V | 4 | ✓ | ✓  | 4 | ✓ |    |   |    |
| F | 5 |   |    | 3 | ✓ |    |   |    |
| K | 6 |   | ✓  | 2 |   |    |   |    |
| K | 7 | ✓ |    | 1 |   |    |   |    |

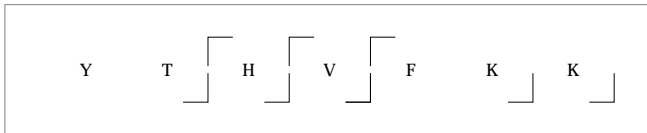

dbValid true YQKPEIPK PHOS(1) 2. 541. 0.767717 5.13852 100. ? 2232.  
 S\_Acido\_new%gi|68567557|gb|AAY80486.1| YQKPEIPK%:PHOS:::sample\_1%compd\_920

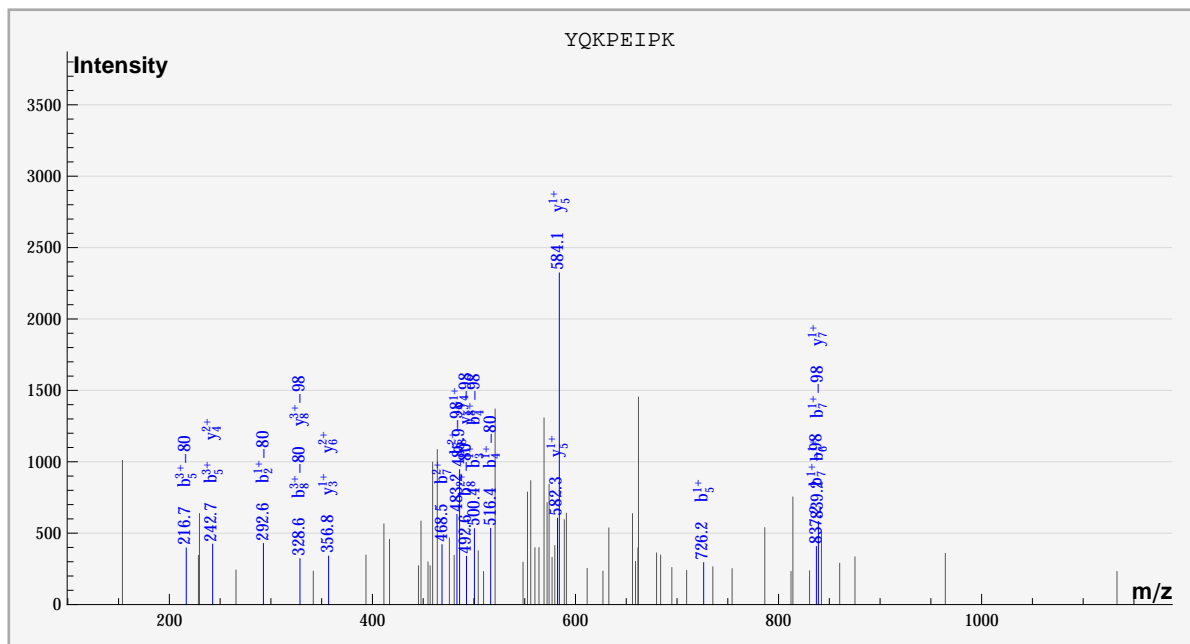

|   | # | b | b* | # | y | y* | P | P* |
|---|---|---|----|---|---|----|---|----|
| Y | 1 |   |    |   |   |    |   | ✓  |
| Q | 2 |   | ✓  | 7 | ✓ |    |   |    |
| K | 3 | ✓ |    | 6 | ✓ |    |   |    |
| P | 4 |   | ✓  | 5 | ✓ |    |   |    |
| E | 5 | ✓ | ✓  | 4 | ✓ |    |   |    |
| I | 6 | ✓ |    | 3 | ✓ |    |   |    |
| P | 7 | ✓ | ✓  | 2 |   |    |   |    |
| K | 8 |   | ✓  | 1 |   |    |   |    |

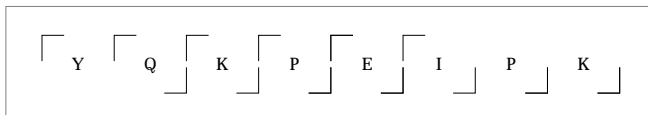

dbValid true LKETGVISR PHOS(1) 2. 541. 0.783897 5.07307 100. ? 2358.  
 S\_Acido\_new%gi|68568331|gb|AAY81260.1| LKETGVISR%::::PHOS::::%sample\_0%cmpd\_965

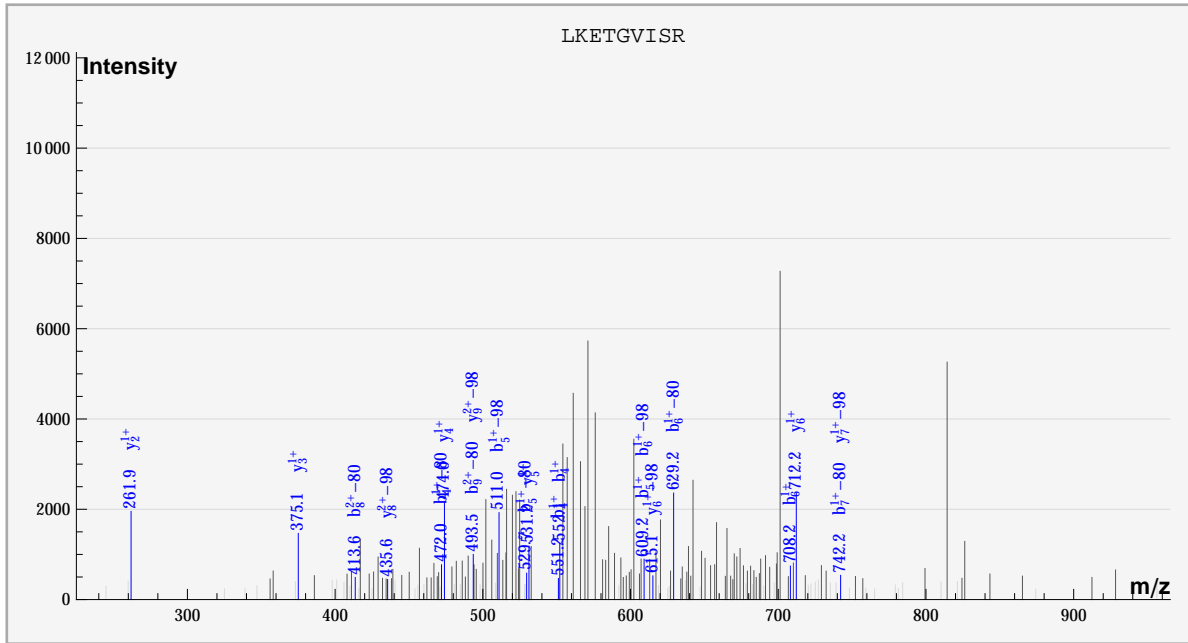

|   | # | b | b* | # | y | y* | P | P* |
|---|---|---|----|---|---|----|---|----|
| L | 1 |   |    |   |   |    |   | ✓  |
| K | 2 |   |    | 8 |   |    |   | ✓  |
| E | 3 |   |    | 7 |   |    |   | ✓  |
| T | 4 | ✓ | ✓  | 6 | ✓ | ✓  |   |    |
| G | 5 | ✓ | ✓  | 5 | ✓ |    |   |    |
| V | 6 | ✓ | ✓  | 4 | ✓ |    |   |    |
| I | 7 |   | ✓  | 3 | ✓ |    |   |    |
| S | 8 |   | ✓  | 2 | ✓ |    |   |    |
| R | 9 |   | ✓  | 1 |   |    |   |    |

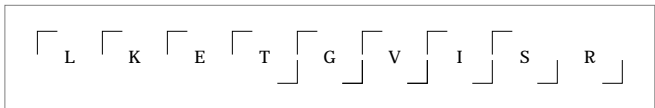

dbValid true LKETGVISR PHOS(1) 2. 541. 0.783897 4.90217 100. ? 2370.  
 S\_Acido\_new%gi|68568331|gb|AAY81260.1| LKETGVISR%::::PHOS::::%sample\_0%cmpd\_975

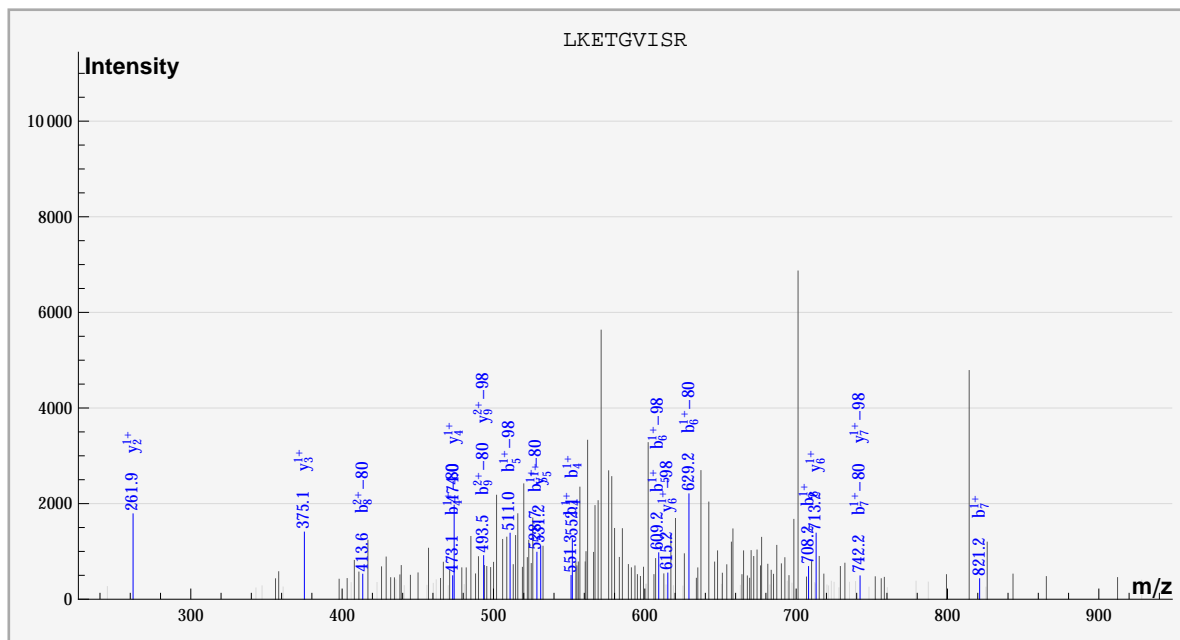

|   | # | b | b* | # | y | y* | P | P* |
|---|---|---|----|---|---|----|---|----|
| L | 1 |   |    |   |   |    |   | ✓  |
| K | 2 |   |    | 8 |   |    |   |    |
| E | 3 |   |    | 7 |   | ✓  |   |    |
| T | 4 | ✓ | ✓  | 6 | ✓ | ✓  |   |    |
| G | 5 | ✓ | ✓  | 5 | ✓ |    |   |    |
| V | 6 | ✓ | ✓  | 4 | ✓ |    |   |    |
| I | 7 | ✓ | ✓  | 3 | ✓ |    |   |    |
| S | 8 |   | ✓  | 2 | ✓ |    |   |    |
| R | 9 |   | ✓  | 1 |   |    |   |    |

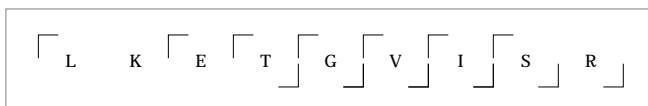

dbValid true EDTSLPKK PHOS(2) 2. 541. -1.78314 5.17962 100. ? 3162.  
 S\_Acido\_new%gi|68567013|gb|AA79942.1| EDTSLPKK%:::PHOS:PHOS:::%sample\_1%cmpd\_1771

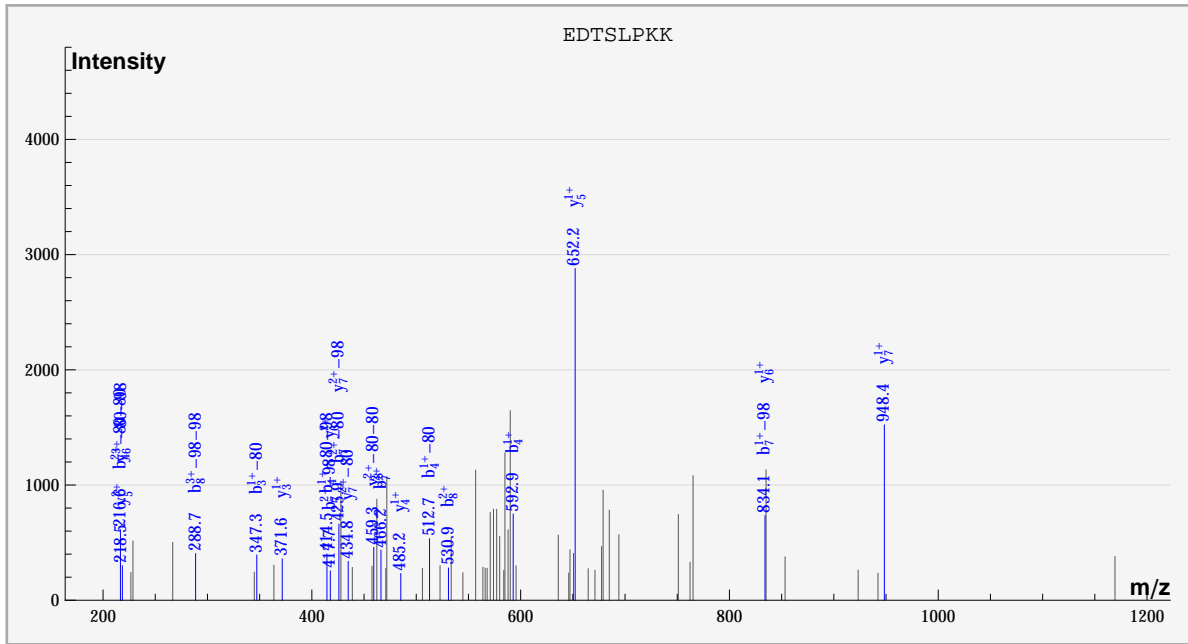

|   | # | b | b* | # | y | y* | P | P* |
|---|---|---|----|---|---|----|---|----|
| E | 1 |   |    |   |   |    |   | ✓  |
| D | 2 |   |    | 7 | ✓ | ✓  |   |    |
| T | 3 | ✓ | ✓  | 6 | ✓ | ✓  |   |    |
| S | 4 | ✓ | ✓  | 5 | ✓ |    |   |    |
| L | 5 |   |    | 4 | ✓ |    |   |    |
| P | 6 |   |    | 3 | ✓ |    |   |    |
| K | 7 | ✓ | ✓  | 2 |   |    |   |    |
| K | 8 | ✓ | ✓  | 1 |   |    |   |    |

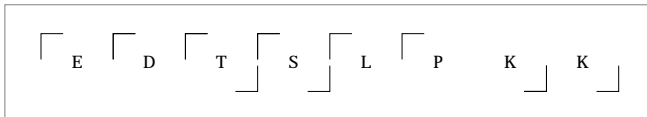

dbValid true YPYFLSK PHOS(2) 2. 541. -1.79169 5.34858 100. ? 4002.

S\_Acido\_new%gii68567525|gb|AAY80454.1| YPYFLSK%:PHOS:PHOS:::%sample\_1%compd\_2544

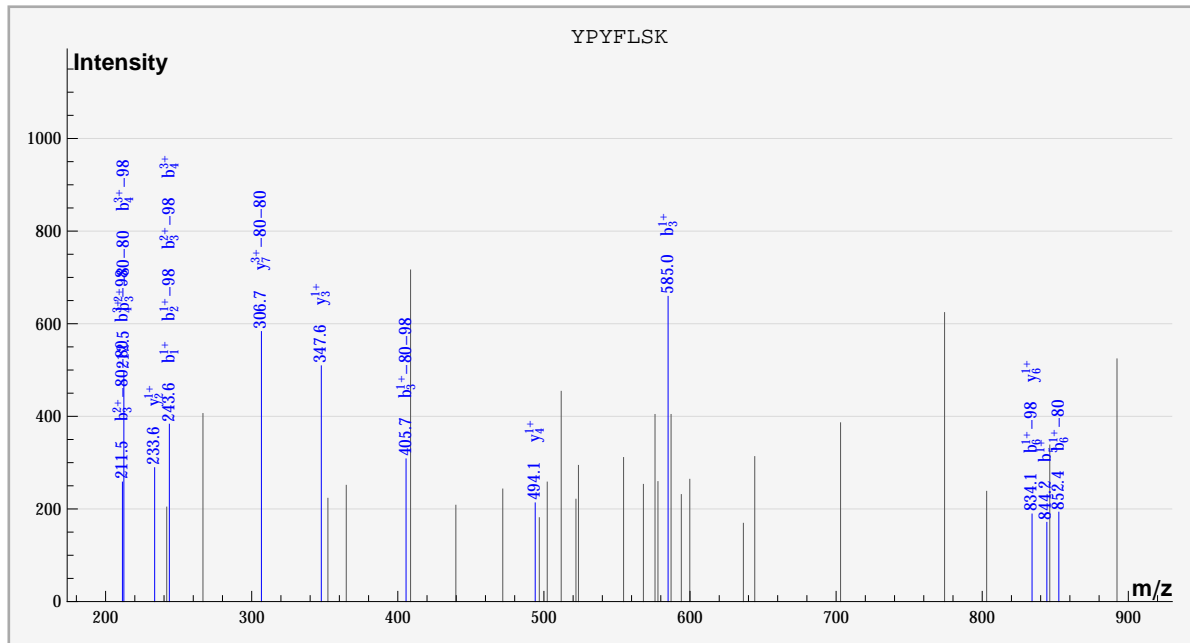

|   | # | b | b* | # | y | y* | P | P* |
|---|---|---|----|---|---|----|---|----|
| Y | 1 | ✓ |    |   |   |    |   | ✓  |
| P | 2 |   | ✓  | 6 | ✓ |    |   |    |
| Y | 3 | ✓ | ✓  | 5 |   |    |   |    |
| F | 4 | ✓ | ✓  | 4 | ✓ |    |   |    |
| L | 5 | ✓ |    | 3 | ✓ |    |   |    |
| S | 6 |   | ✓  | 2 | ✓ |    |   |    |
| K | 7 |   |    | 1 |   |    |   |    |

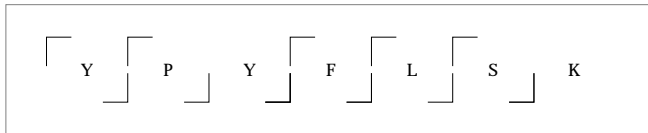

dbValid true DEYMGYK Oxidation\_M(1),PHOS(2) 2. 541. 0.152867 5.11891 100. ? 4314.  
 S\_Acido\_new%gil68567301|gb|AAY80230.1| DEYMGYK%:::PHOS:Oxidation\_M::PHOS::%sample\_1%compd\_2829

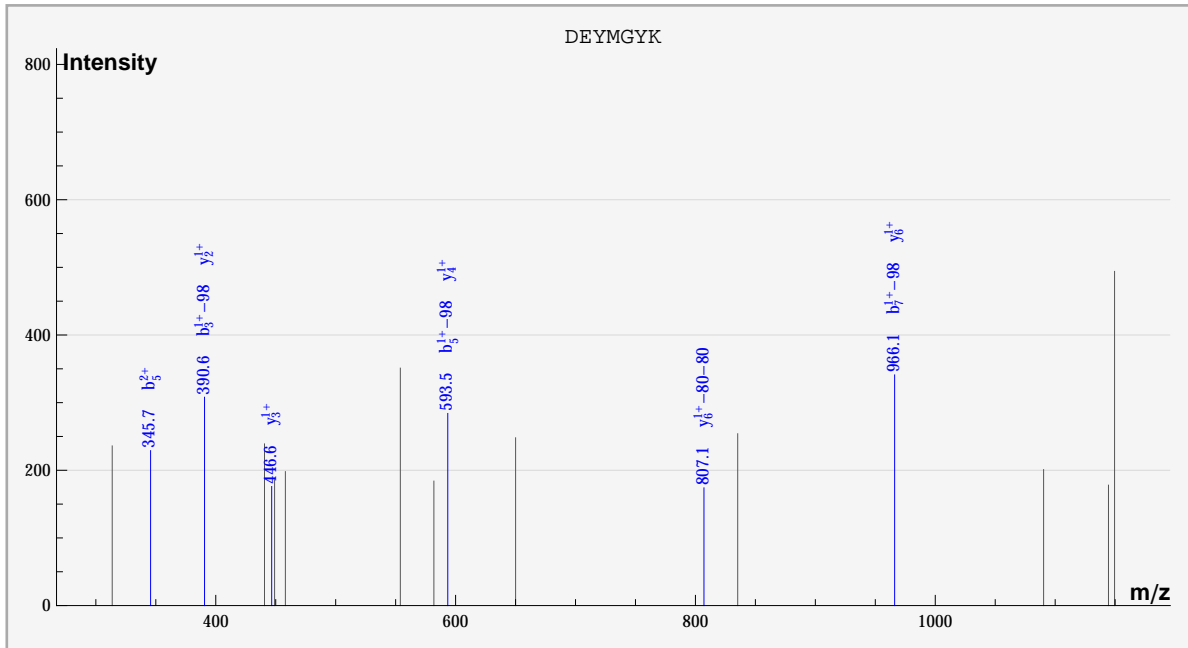

|   | # | b | b* | # | y | y* | P | P* |
|---|---|---|----|---|---|----|---|----|
| D | 1 |   |    |   |   |    |   |    |
| E | 2 |   |    | 6 | ✓ | ✓  |   |    |
| Y | 3 | ✓ |    | 5 |   |    |   |    |
| M | 4 |   |    | 4 | ✓ |    |   |    |
| G | 5 | ✓ | ✓  | 3 | ✓ |    |   |    |
| Y | 6 |   |    | 2 | ✓ |    |   |    |
| K | 7 |   | ✓  | 1 |   |    |   |    |

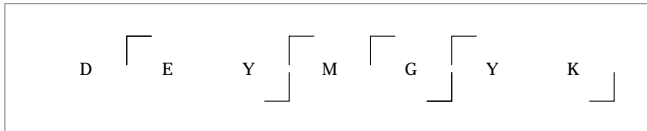

dbValid true TSGIYGSNK PHOS(2) 2. 542. 1.69884 5.2225 100. ? 1494.  
 S\_Acido\_new%gii68568082|gb|AAy81011.1| TSGIYGSNK%:PHOS:::PHOS:::sample\_1%compd\_241

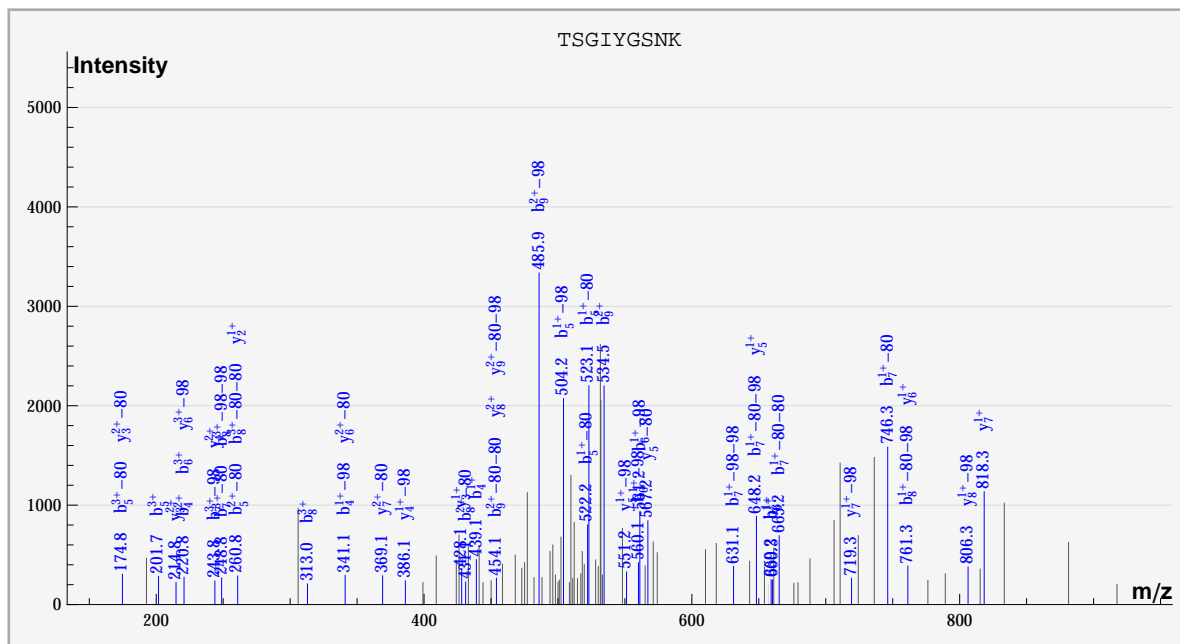

|   | # | b | b* | # | y | y* | P | P* |
|---|---|---|----|---|---|----|---|----|
| T | 1 |   |    |   |   |    |   | ✓  |
| S | 2 |   |    | 8 | ✓ | ✓  |   |    |
| G | 3 |   |    | 7 | ✓ | ✓  |   |    |
| I | 4 | ✓ | ✓  | 6 | ✓ | ✓  |   |    |
| Y | 5 | ✓ | ✓  | 5 | ✓ | ✓  |   |    |
| G | 6 | ✓ | ✓  | 4 | ✓ | ✓  |   |    |
| S | 7 |   | ✓  | 3 | ✓ | ✓  |   |    |
| N | 8 | ✓ | ✓  | 2 | ✓ |    |   |    |
| K | 9 | ✓ | ✓  | 1 |   |    |   |    |

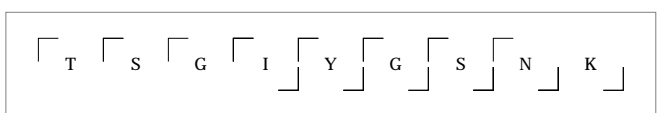



dbValid true YKEERFK PHOS(1) 2. 542. -1.75031 5.41096 100. ? 1614.

S\_Acido\_new%gi|68567478|gb|AAY80407.1| YKEERFK%:PHOS:.....%sample\_2%cmpd\_344

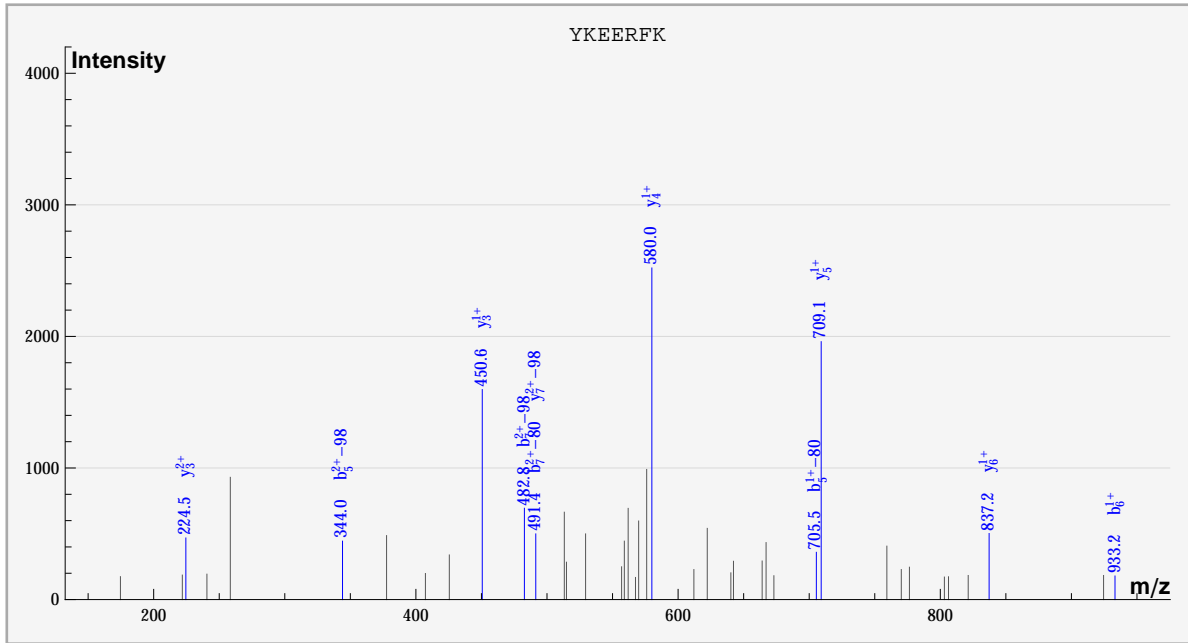

|   | # | b | b* | # | y | y* | P | P* |
|---|---|---|----|---|---|----|---|----|
| Y | 1 |   |    |   |   |    |   | ✓  |
| K | 2 |   |    | 6 | ✓ |    |   |    |
| E | 3 |   |    | 5 | ✓ |    |   |    |
| E | 4 |   |    | 4 | ✓ |    |   |    |
| R | 5 | ✓ |    | 3 | ✓ |    |   |    |
| F | 6 | ✓ |    | 2 |   |    |   |    |
| K | 7 | ✓ |    | 1 |   |    |   |    |

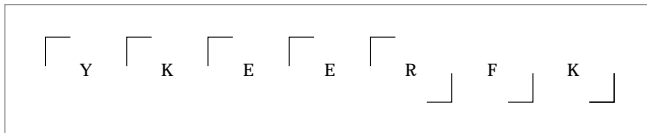

dbValid true RDIGSGTSGR PHOS(1) 2. 542. 1.24039 4.94444 100. ? 3834.  
 S\_Acido\_new%gii68568399|gb|AAY81328.1| RDIGSGTSGR%::::PHOS::::%sample\_1%compd\_2391

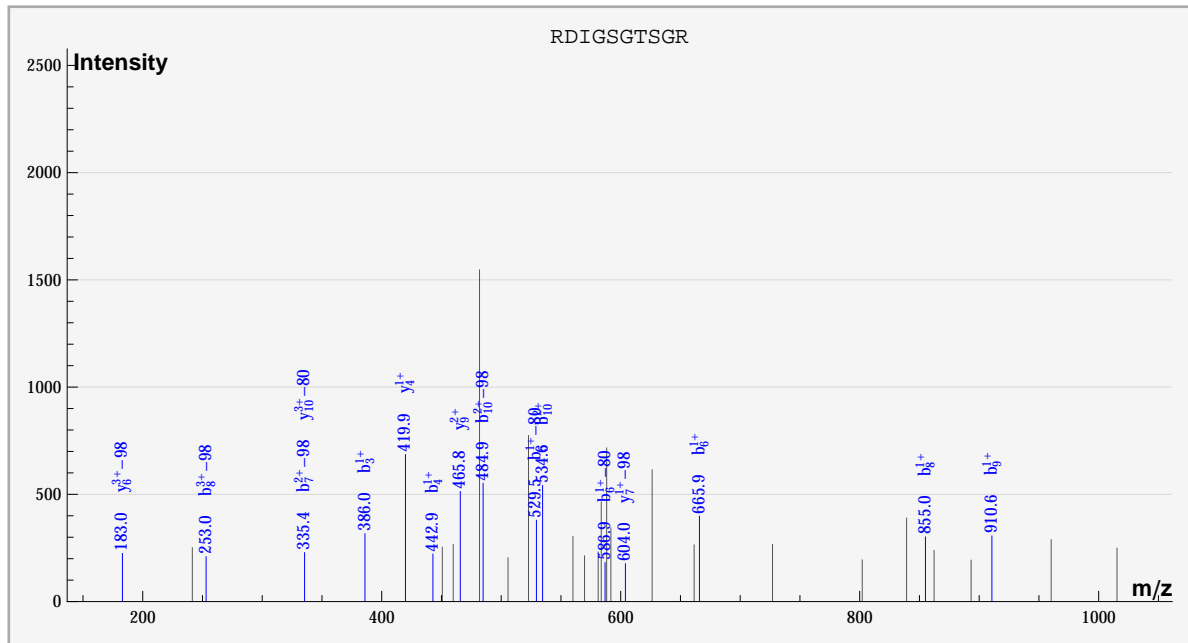

|   | #  | b | b* | # | y | y* | P | P* |
|---|----|---|----|---|---|----|---|----|
| R | 1  |   |    |   |   |    |   | ✓  |
| D | 2  |   |    | 9 | ✓ |    |   |    |
| I | 3  | ✓ |    | 8 |   |    |   |    |
| G | 4  | ✓ |    | 7 |   | ✓  |   |    |
| S | 5  |   | ✓  | 6 |   | ✓  |   |    |
| G | 6  | ✓ | ✓  | 5 |   |    |   |    |
| T | 7  |   | ✓  | 4 | ✓ |    |   |    |
| S | 8  | ✓ | ✓  | 3 |   |    |   |    |
| G | 9  | ✓ |    | 2 |   |    |   |    |
| R | 10 | ✓ | ✓  | 1 |   |    |   |    |

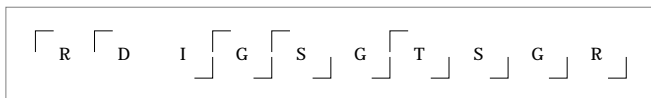

dbValid true SQGKITSQR PHOS(1) 2. 542. 0.760962 5.00345 100. ? 4074.  
 S\_Acido\_new%gi|68568349|gb|AAy81278.1| SQGKITSQR%:PHOS:::sample\_1%compd\_2611

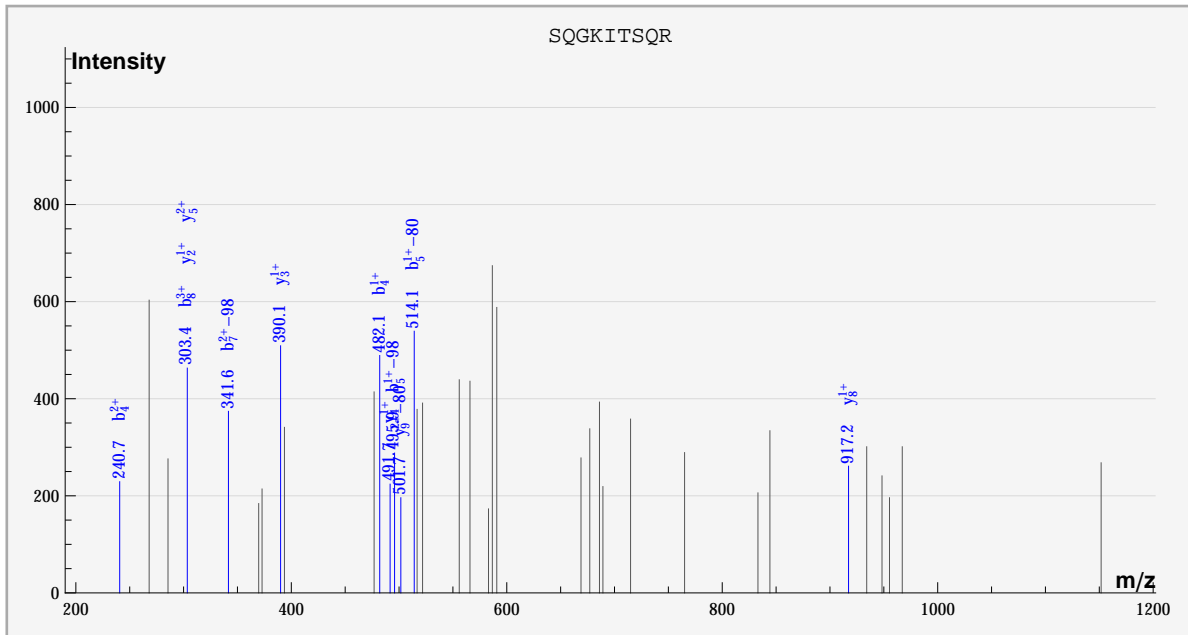

|   | # | b | b* | # | y | y* | P | P* |
|---|---|---|----|---|---|----|---|----|
| S | 1 |   |    |   |   |    |   | ✓  |
| Q | 2 |   |    | 8 |   | ✓  |   |    |
| G | 3 |   |    | 7 |   |    |   |    |
| K | 4 | ✓ |    | 6 |   |    |   |    |
| I | 5 |   | ✓  | 5 |   | ✓  |   |    |
| T | 6 |   |    | 4 |   | ✓  |   |    |
| S | 7 |   | ✓  | 3 |   | ✓  |   |    |
| Q | 8 | ✓ |    | 2 |   | ✓  |   |    |
| R | 9 |   |    | 1 |   |    |   |    |

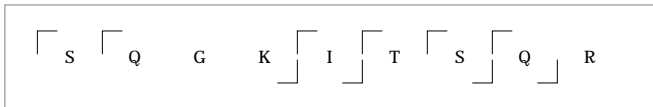

dbValid true YYKIDPK PHOS(2) 2. 542. 1.71904 5.74401 100. ? 4752.  
 S\_Acido\_new%gi|68567224|gb|AA80153.1| YYKIDPK%:PHOS:PHOS:::sample\_1%compd\_3227

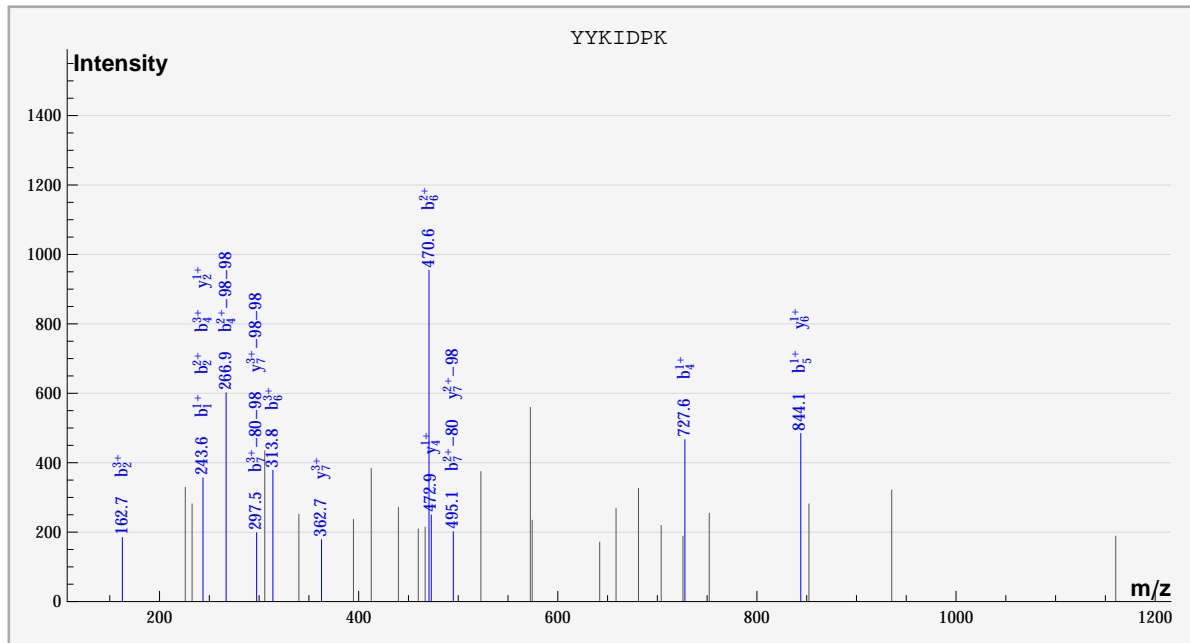

|   | # | b | b* | # | y | y* | P | P* |
|---|---|---|----|---|---|----|---|----|
| Y | 1 | ✓ |    |   |   |    | ✓ | ✓  |
| Y | 2 | ✓ |    | 6 | ✓ |    |   |    |
| K | 3 |   |    | 5 |   |    |   |    |
| I | 4 | ✓ | ✓  | 4 | ✓ |    |   |    |
| D | 5 | ✓ |    | 3 |   |    |   |    |
| P | 6 | ✓ |    | 2 | ✓ |    |   |    |
| K | 7 |   | ✓  | 1 |   |    |   |    |

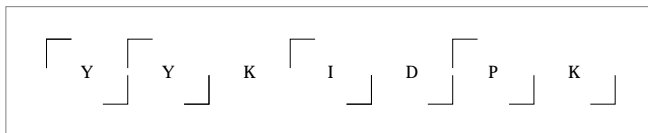

dbValid true IYIPEYK PHOS(2) 2. 542. 1.22141 5.11633 100. ? 4956.  
 S\_Acido\_new%gi|68568320|gb|AA81249.1| IYIPEYK%::PHOS:::PHOS::%sample\_1%compd\_3411

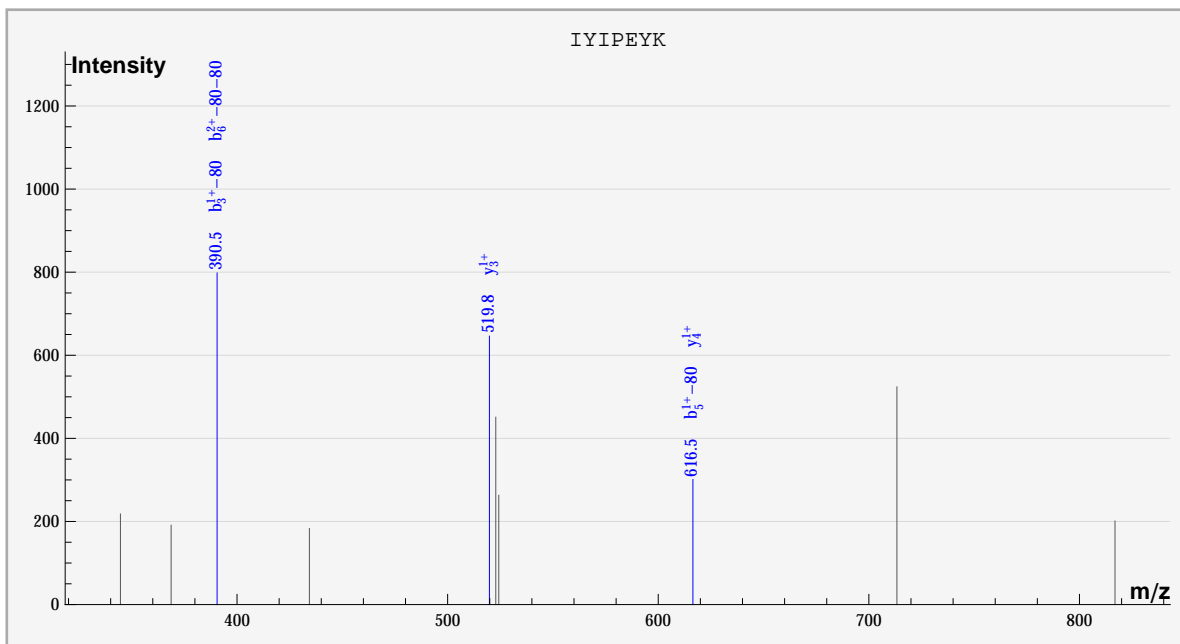

|   | # | b | b* | # | y | y* | P | P* |
|---|---|---|----|---|---|----|---|----|
| I | 1 |   |    |   |   |    |   |    |
| Y | 2 |   |    | 6 |   |    |   |    |
| I | 3 | ✓ |    | 5 |   |    |   |    |
| P | 4 |   |    | 4 | ✓ |    |   |    |
| E | 5 | ✓ |    | 3 | ✓ |    |   |    |
| Y | 6 | ✓ |    | 2 | ✓ |    |   |    |
| K | 7 |   |    | 1 |   |    |   |    |

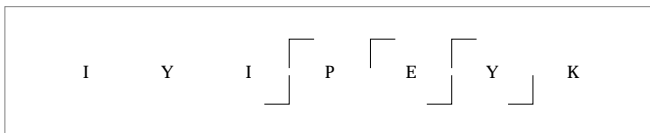

dbValid true FYGIESHR PHOS(1) 2. 543. 1.73167 5.06172 100. ? 1692.  
 S\_Acido\_new%gi|68567737|gb|AAY80666.1| FYGIESHR::PHOS:::sample\_1%cmpd\_423

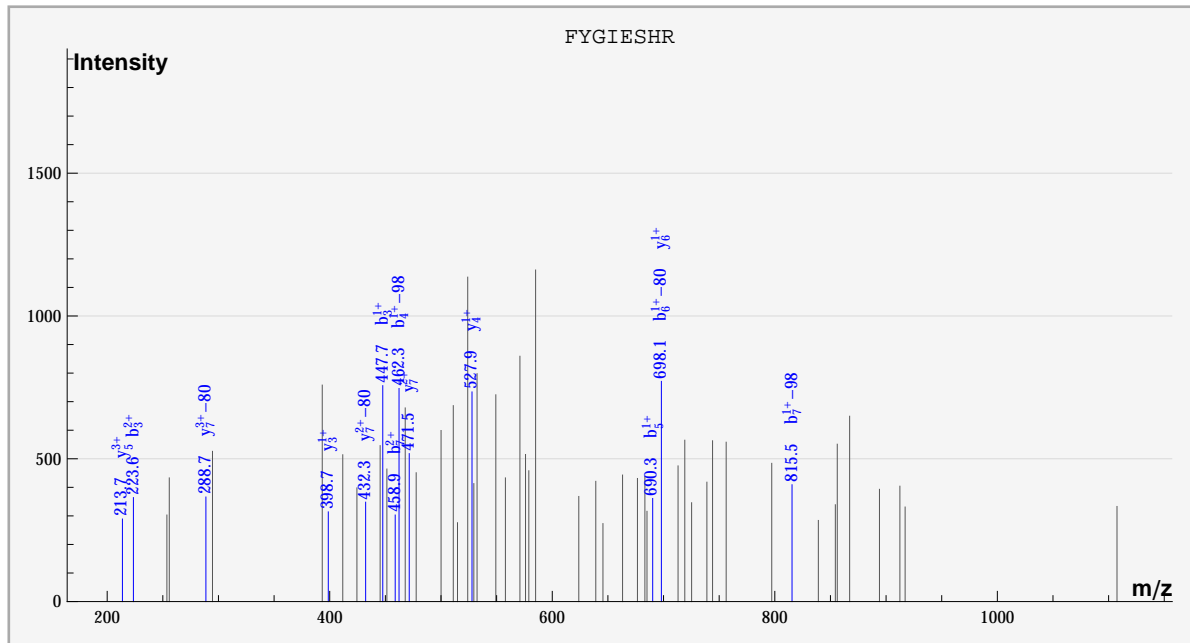

|   | # | b | b* | # | y | y* | P | P* |
|---|---|---|----|---|---|----|---|----|
| F | 1 |   |    |   |   |    |   |    |
| Y | 2 |   |    | 7 | ✓ | ✓  |   |    |
| G | 3 | ✓ |    | 6 | ✓ |    |   |    |
| I | 4 |   | ✓  | 5 | ✓ |    |   |    |
| E | 5 | ✓ |    | 4 | ✓ |    |   |    |
| S | 6 |   | ✓  | 3 | ✓ |    |   |    |
| H | 7 | ✓ | ✓  | 2 |   |    |   |    |
| R | 8 |   |    | 1 |   |    |   |    |

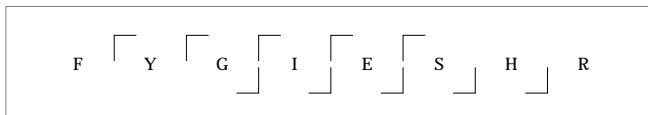

dbValid true EVSLELRR PHOS(1) 2. 543. -1.7263 5.01009 100. ? 1710.

S\_Acido\_new%gi|68567365|gb|AAY80294.1| EVSLELRR%:::PHOS:::%sample\_2%compd\_430

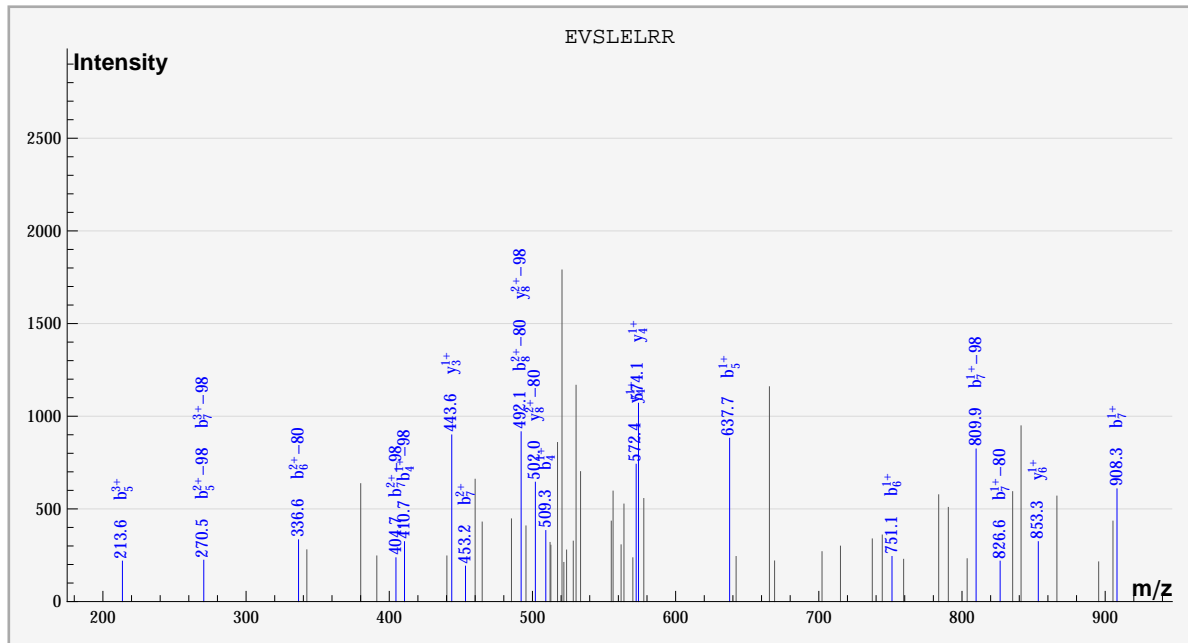

|   | # | b | b* | # | y | y* | P | P* |
|---|---|---|----|---|---|----|---|----|
| E | 1 |   |    |   |   |    |   | ✓  |
| V | 2 |   |    | 7 |   |    |   |    |
| S | 3 |   |    | 6 | ✓ |    |   |    |
| L | 4 | ✓ | ✓  | 5 |   |    |   |    |
| E | 5 | ✓ | ✓  | 4 | ✓ |    |   |    |
| L | 6 | ✓ | ✓  | 3 | ✓ |    |   |    |
| R | 7 | ✓ | ✓  | 2 |   |    |   |    |
| R | 8 |   | ✓  | 1 |   |    |   |    |

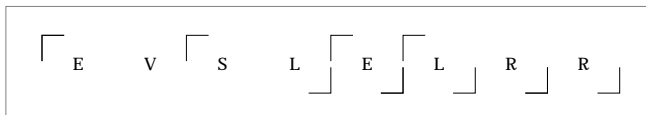

dbValid true KKLITYLK PHOS(1) 2. 543. 0.819752 5.06811 100. ? 1830.  
 S\_Acido\_new%gi|68567722|gb|AAY80651.1| KKLITYLK%:::::PHOS::::sample\_2%cmpd\_533

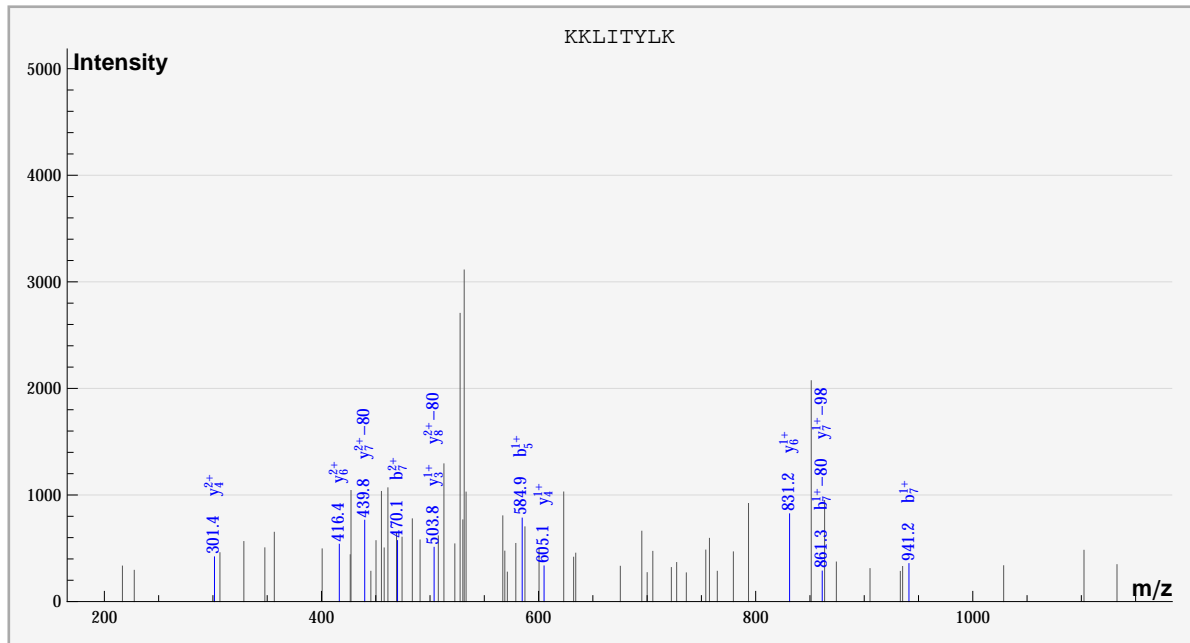

|   | # | b | b* | # | y | y* | P | P* |
|---|---|---|----|---|---|----|---|----|
| K | 1 |   |    |   |   |    |   | ✓  |
| K | 2 |   |    | 7 |   | ✓  |   |    |
| L | 3 |   |    | 6 | ✓ |    |   |    |
| I | 4 |   |    | 5 |   |    |   |    |
| T | 5 | ✓ |    | 4 | ✓ |    |   |    |
| Y | 6 |   |    | 3 | ✓ |    |   |    |
| L | 7 | ✓ | ✓  | 2 |   |    |   |    |
| K | 8 |   |    | 1 |   |    |   |    |

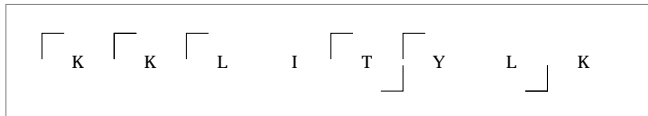



dbValid true GKVQLNAGSK PHOS(1) 2. 543. -1.7263 5.05753 100. ? 2280.  
 S\_Acido\_new%gi|68567408|gb|AA80337.1| GKVQLNAGSK%:::PHOS::%sample\_1%cmpd\_966

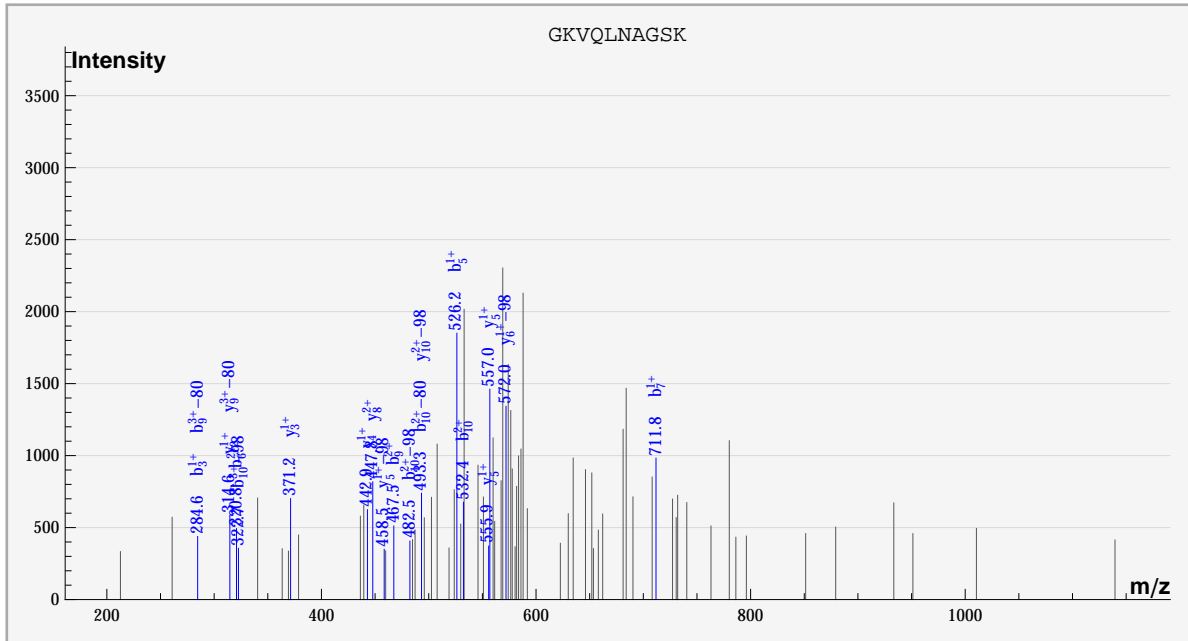

|   | #  | b | b* | # | y | y* | P | P* |
|---|----|---|----|---|---|----|---|----|
| G | 1  |   |    |   |   |    |   | ✓  |
| K | 2  |   |    | 9 |   | ✓  |   |    |
| V | 3  | ✓ |    | 8 | ✓ |    |   |    |
| Q | 4  |   |    | 7 |   |    |   |    |
| L | 5  | ✓ |    | 6 |   | ✓  |   |    |
| N | 6  | ✓ |    | 5 | ✓ | ✓  |   |    |
| A | 7  | ✓ |    | 4 | ✓ |    |   |    |
| G | 8  |   |    | 3 | ✓ |    |   |    |
| S | 9  | ✓ | ✓  | 2 | ✓ |    |   |    |
| K | 10 | ✓ | ✓  | 1 |   |    |   |    |

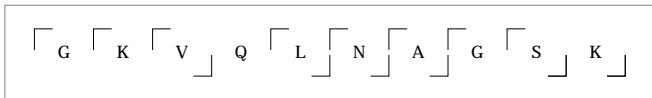

dbValid true RVL DSTVSK PHOS(1) 2. 543. -0.226468 4.99491 100. ? 2700.  
 S\_Acido\_new%gi|68567905|gb|AAV80834.1 RVL DSTVSK%:::PHOS::%sample\_1%cmpd\_1354

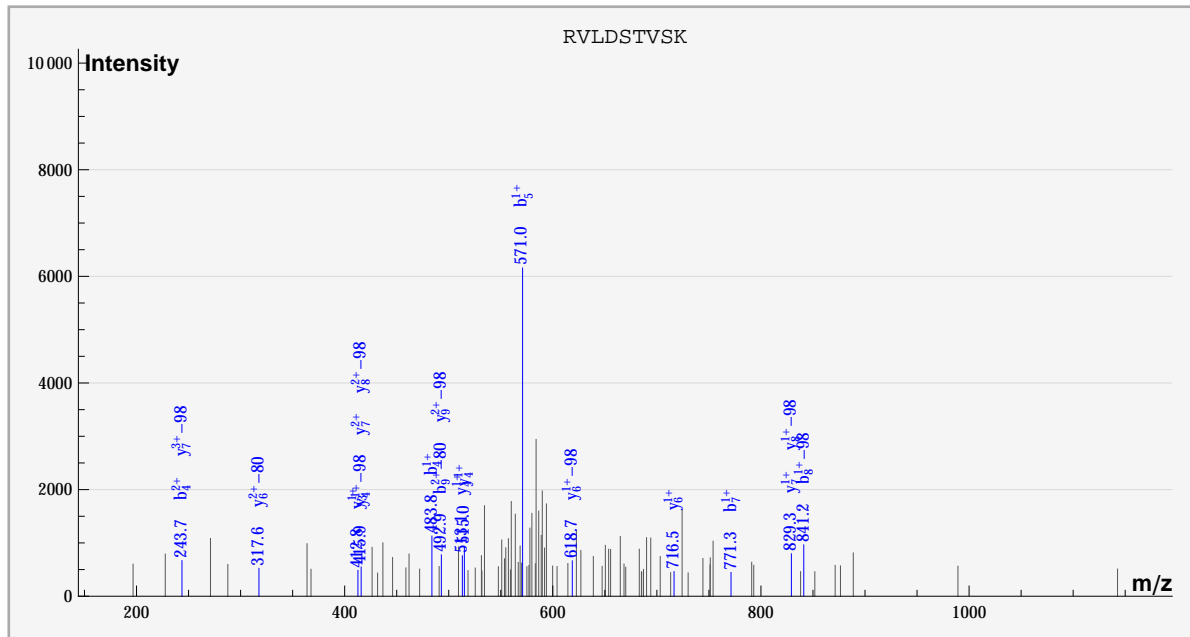

|   | # | b | b* | # | y | y* | P | P* |
|---|---|---|----|---|---|----|---|----|
| R | 1 |   |    |   |   |    |   | ✓  |
| V | 2 |   |    | 8 |   | ✓  |   |    |
| L | 3 |   |    | 7 | ✓ | ✓  |   |    |
| D | 4 | ✓ |    | 6 | ✓ | ✓  |   |    |
| S | 5 | ✓ |    | 5 |   |    |   |    |
| T | 6 |   |    | 4 | ✓ | ✓  |   |    |
| V | 7 | ✓ |    | 3 | ✓ |    |   |    |
| S | 8 |   | ✓  | 2 |   |    |   |    |
| K | 9 |   | ✓  | 1 |   |    |   |    |

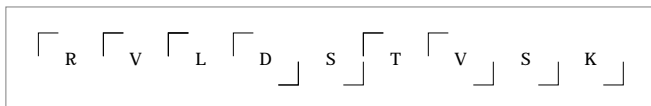

dbValid true SLVINTMK Oxidation\_M(1),PHOS(2) 2. 543. -1.77637 4.95117 100. ? 2808.  
 S\_Acido\_new%gii68567630|gb|AAy80559.1| SLVINTMK%:PHOS:::PHOS:Oxidation\_M::%sample\_1%compd\_1453

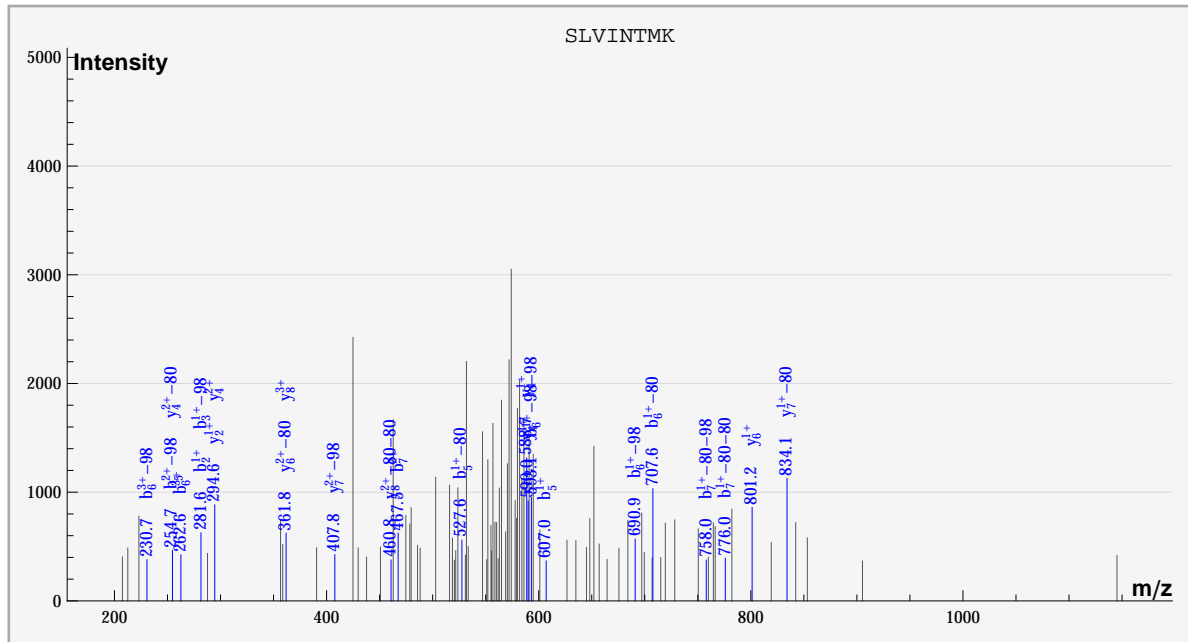

|   | # | b | b* | # | y | y* | P | P* |
|---|---|---|----|---|---|----|---|----|
| S | 1 |   |    |   |   |    | ✓ | ✓  |
| L | 2 | ✓ |    | 7 |   | ✓  |   |    |
| V | 3 |   | ✓  | 6 | ✓ | ✓  |   |    |
| I | 4 |   |    | 5 |   |    |   |    |
| N | 5 | ✓ | ✓  | 4 | ✓ | ✓  |   |    |
| T | 6 | ✓ | ✓  | 3 |   |    |   |    |
| M | 7 | ✓ | ✓  | 2 | ✓ |    |   |    |
| K | 8 |   |    | 1 |   |    |   |    |

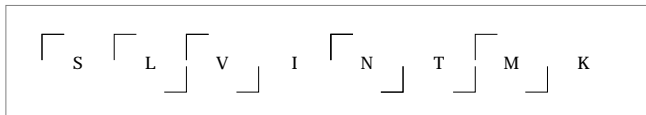

dbValid true VPSQTLKTM PHOS(1) 2. 543. -0.240958 5.19089 100. ? 3150.  
 S\_Acido\_new%gi|68567120|gb|AA80049.1| VPSQTLKTM%:::PHOS:::sample\_1%cmpd\_1763

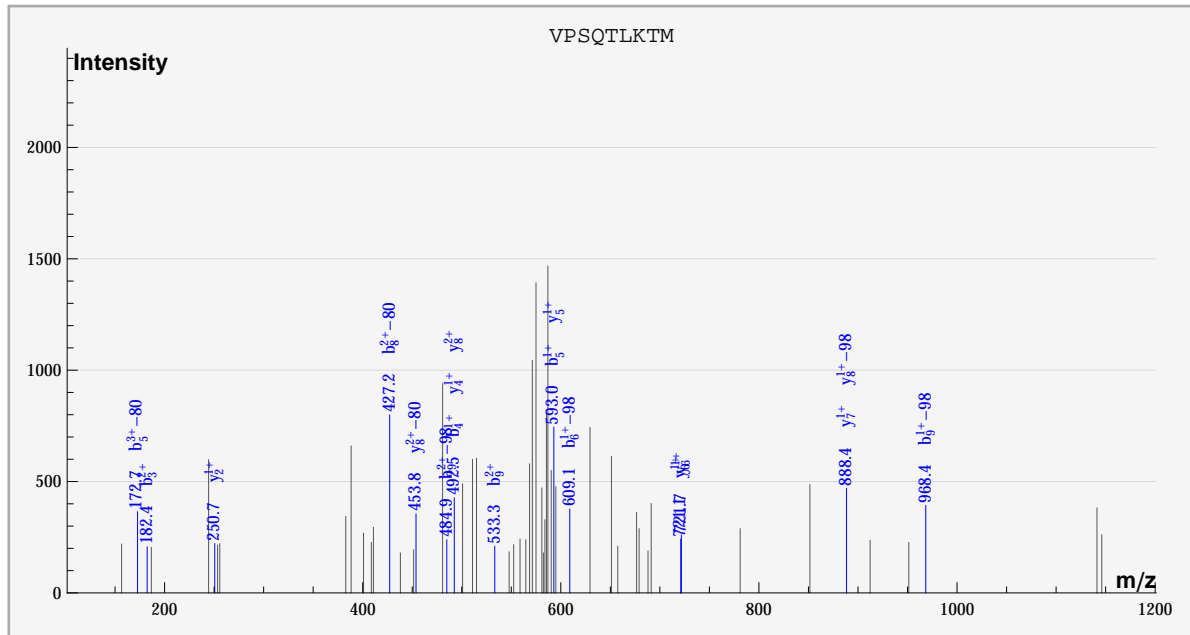

|   | # | b | b* | # | y | y* | P | P* |
|---|---|---|----|---|---|----|---|----|
| V | 1 |   |    |   |   |    |   |    |
| P | 2 |   |    | 8 | ✓ | ✓  |   |    |
| S | 3 | ✓ |    | 7 | ✓ |    |   |    |
| Q | 4 | ✓ |    | 6 | ✓ |    |   |    |
| T | 5 | ✓ | ✓  | 5 | ✓ |    |   |    |
| L | 6 |   | ✓  | 4 | ✓ |    |   |    |
| K | 7 |   |    | 3 |   |    |   |    |
| T | 8 |   | ✓  | 2 | ✓ |    |   |    |
| M | 9 | ✓ | ✓  | 1 |   |    |   |    |

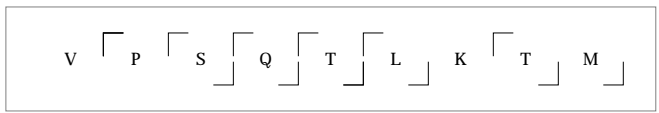

dbValid true YYLSVNDK PHOS(1) 2. 543. -1.76629 5.69372 100. ? 3606.  
 S\_Acido\_new%gi|68567739|gb|AAY80668.1| YYLSVNDK%:PHOS:.....%sample\_1%cmpd\_2182

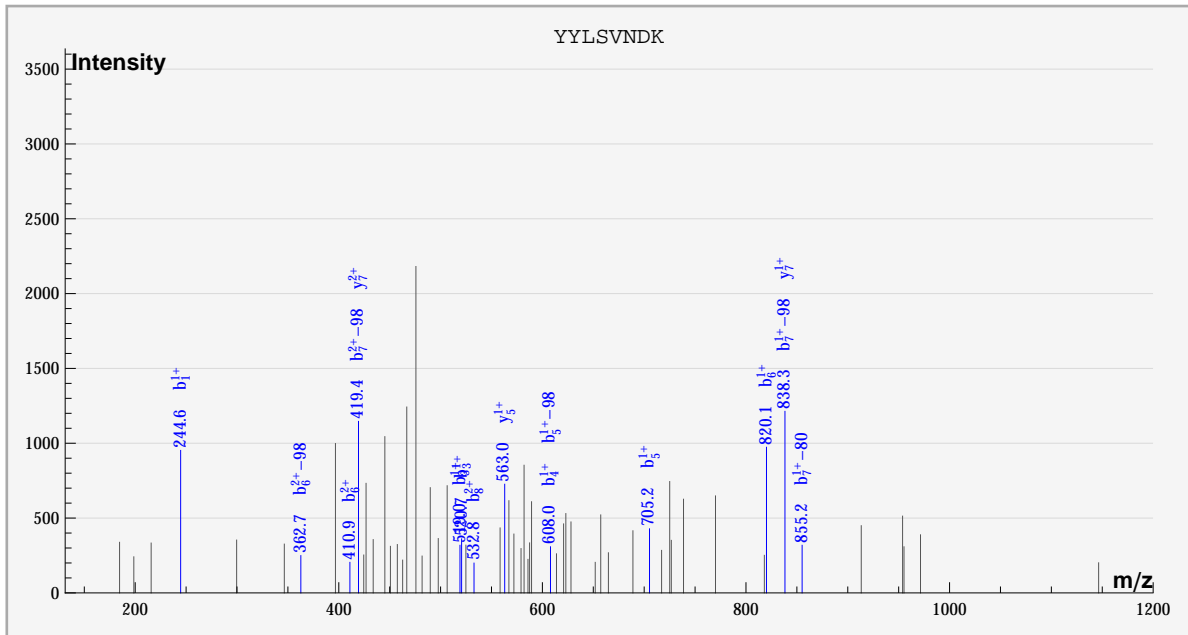

|   | # | b | b* | # | y | y* | P | P* |
|---|---|---|----|---|---|----|---|----|
| Y | 1 | ✓ |    |   |   |    |   |    |
| Y | 2 |   |    | 7 | ✓ |    |   |    |
| L | 3 | ✓ |    | 6 |   |    |   |    |
| S | 4 | ✓ |    | 5 | ✓ |    |   |    |
| V | 5 | ✓ | ✓  | 4 |   |    |   |    |
| N | 6 | ✓ | ✓  | 3 |   |    |   |    |
| D | 7 |   | ✓  | 2 |   |    |   |    |
| K | 8 | ✓ |    | 1 |   |    |   |    |

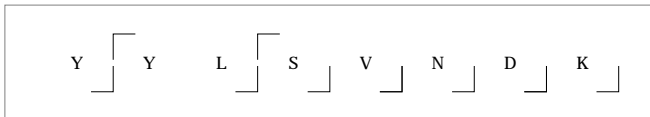

dbValid true QYGS GSSR PHOS(3) 2. 543. -1.85697 5.43792 100. ? 3714.

S\_Acido\_new%gi68567631|gb|AA80560.1| QYGS GSSR%::PHOS::PHOS::PHOS:::sample\_1%compd\_2283

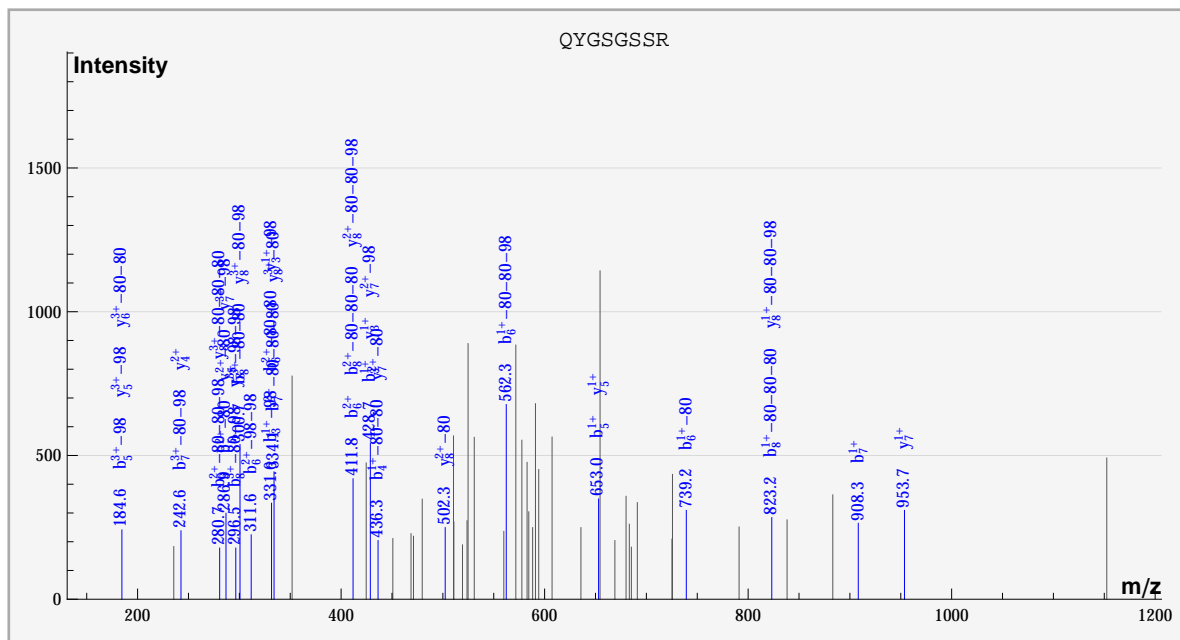

|   | # | b | b* | # | y | y* | P | P* |
|---|---|---|----|---|---|----|---|----|
| Q | 1 |   |    |   |   |    |   | ✓  |
| Y | 2 |   |    | 7 | ✓ | ✓  |   |    |
| G | 3 | ✓ | ✓  | 6 |   | ✓  |   |    |
| S | 4 |   | ✓  | 5 | ✓ | ✓  |   |    |
| G | 5 | ✓ | ✓  | 4 | ✓ |    |   |    |
| S | 6 | ✓ | ✓  | 3 | ✓ | ✓  |   |    |
| S | 7 | ✓ | ✓  | 2 |   |    |   |    |
| R | 8 |   | ✓  | 1 |   |    |   |    |

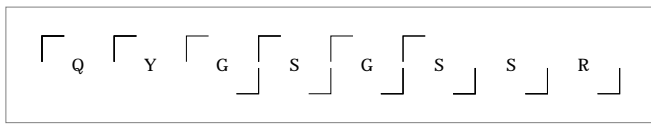

dbValid true NTASIKNTR PHOS(1) 2. 544. -1.23904 5.02685 100. ? 1644.  
 S\_Acido\_new%gi|68567053|gb|AAY79982.1| NTASIKNTR%:.....PHOS::%sample\_1%compd\_380

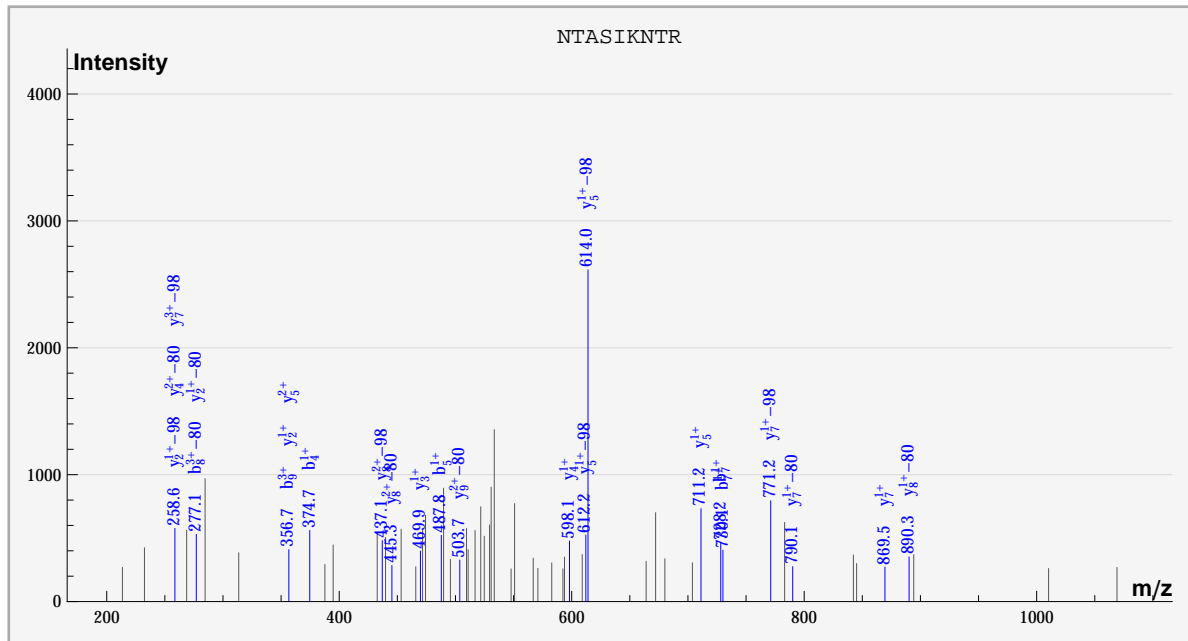

|   | # | b | b* | # | y | y* | P | P* |
|---|---|---|----|---|---|----|---|----|
| N | 1 |   |    |   |   |    |   | ✓  |
| T | 2 |   |    | 8 |   | ✓  |   |    |
| A | 3 |   |    | 7 | ✓ | ✓  |   |    |
| S | 4 | ✓ |    | 6 |   |    |   |    |
| I | 5 | ✓ |    | 5 | ✓ | ✓  |   |    |
| K | 6 |   |    | 4 | ✓ | ✓  |   |    |
| N | 7 | ✓ |    | 3 | ✓ |    |   |    |
| T | 8 |   | ✓  | 2 | ✓ | ✓  |   |    |
| R | 9 | ✓ |    | 1 |   |    |   |    |

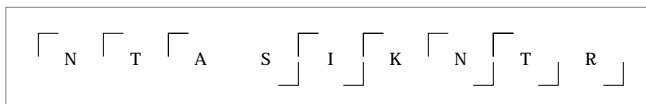

dbValid true ILTIPQPTK PHOS(1) 2. 544. 1.79902 4.9264 100. ? 2400.  
 S\_Acido\_new%gil68567794|gb|AAY80723.1| ILTIPQPTK%:::::PHOS::%sample\_1%compd\_1077

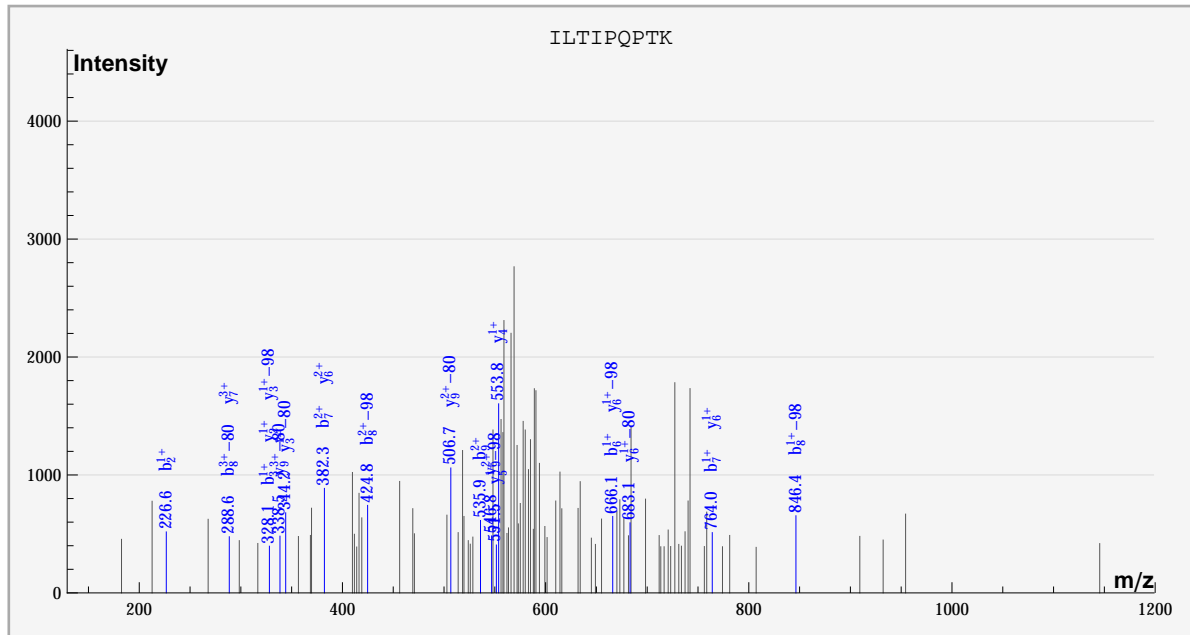

|   | # | b | b* | # | y | y* | P | P* |
|---|---|---|----|---|---|----|---|----|
| I | 1 |   |    |   |   |    | ✓ | ✓  |
| L | 2 | ✓ |    | 8 |   |    |   |    |
| T | 3 | ✓ |    | 7 | ✓ |    |   |    |
| I | 4 |   |    | 6 | ✓ | ✓  |   |    |
| P | 5 |   |    | 5 |   | ✓  |   |    |
| Q | 6 | ✓ |    | 4 | ✓ |    |   |    |
| P | 7 | ✓ |    | 3 |   | ✓  |   |    |
| T | 8 |   | ✓  | 2 | ✓ |    |   |    |
| K | 9 | ✓ |    | 1 |   |    |   |    |

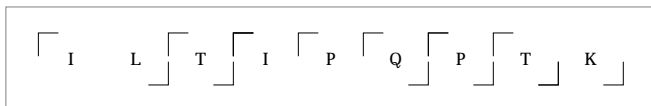



dbValid true YASIALNQQ PHOS(1) 2. 544. 0.262802 4.90604 100. ? 2838.

S\_Acido\_new%gil68568085|gb|AA81014.1| YASIALNQQ%:PHOS:.....%sample\_1%compd\_1476

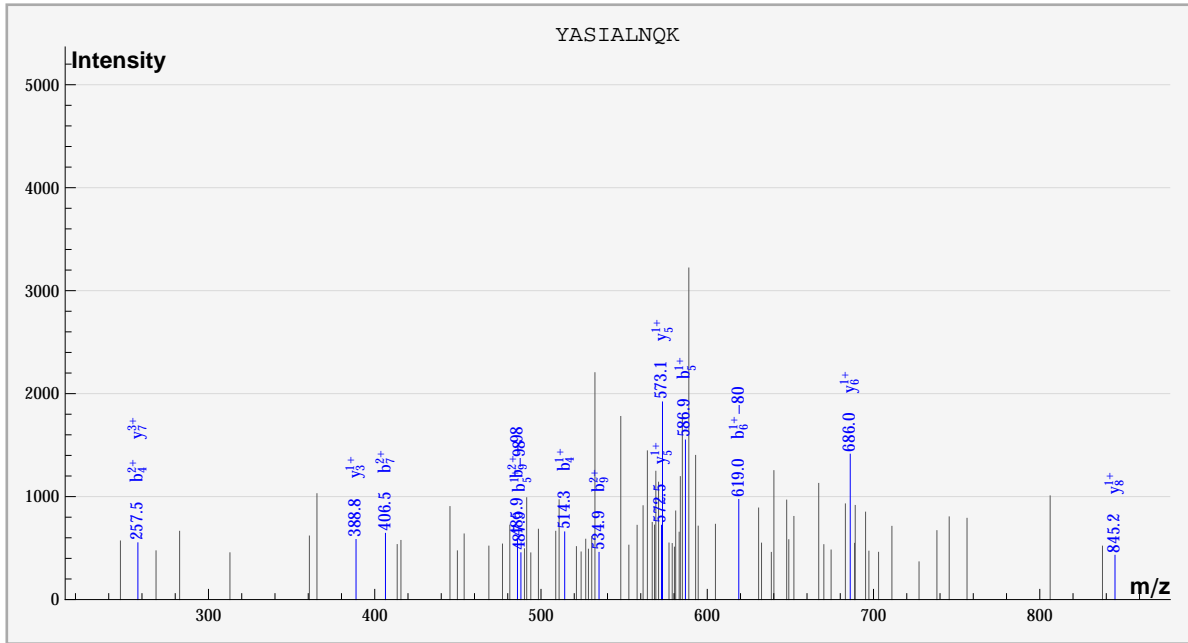

|   | # | b | b* | # | y | y* | P | P* |
|---|---|---|----|---|---|----|---|----|
| Y | 1 |   |    |   |   |    |   |    |
| A | 2 |   |    | 8 | ✓ |    |   |    |
| S | 3 |   |    | 7 | ✓ |    |   |    |
| I | 4 | ✓ |    | 6 | ✓ |    |   |    |
| A | 5 | ✓ | ✓  | 5 | ✓ |    |   |    |
| L | 6 |   | ✓  | 4 |   |    |   |    |
| N | 7 | ✓ |    | 3 | ✓ |    |   |    |
| Q | 8 |   |    | 2 |   |    |   |    |
| K | 9 | ✓ | ✓  | 1 |   |    |   |    |

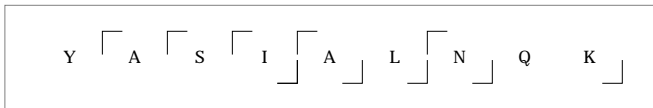

dbValid true TEVTFSHGK PHOS(1) 2. 544. -0.763218 5.11062 100. ? 3678.  
 S\_Acido\_new%gi|68567797|gb|AA80726.1| TEVTFSHGK%:::::PHOS::::%sample\_1%compd\_2251

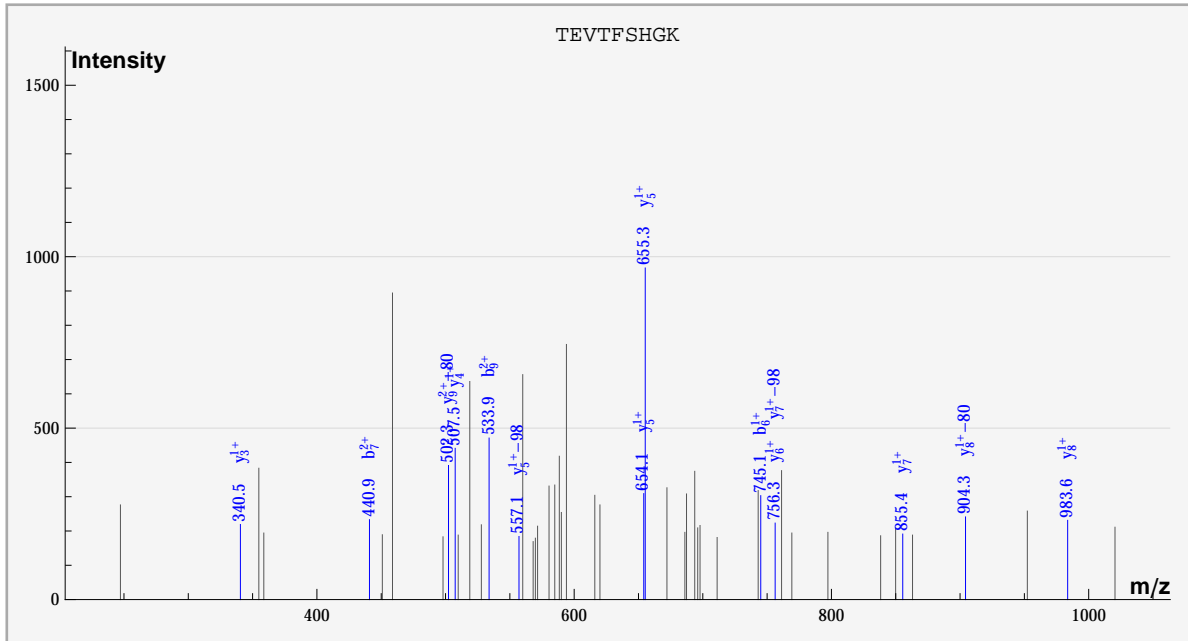

|   | # | b | b* | # | y | y* | P | P* |
|---|---|---|----|---|---|----|---|----|
| T | 1 |   |    |   |   |    |   | ✓  |
| E | 2 |   |    | 8 | ✓ | ✓  |   |    |
| V | 3 |   |    | 7 | ✓ | ✓  |   |    |
| T | 4 |   |    | 6 | ✓ |    |   |    |
| F | 5 |   |    | 5 | ✓ | ✓  |   |    |
| S | 6 | ✓ |    | 4 | ✓ |    |   |    |
| H | 7 | ✓ |    | 3 | ✓ |    |   |    |
| G | 8 |   |    | 2 |   |    |   |    |
| K | 9 | ✓ |    | 1 |   |    |   |    |

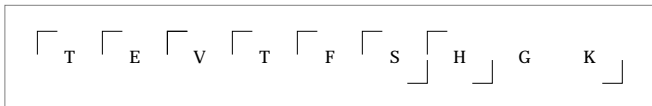

dbValid true YKELSRK PHOS(2) 2. 544. -1.76461 5.07563 100. ? 3846.  
 S\_Acido\_new%gi|68567362|gb|AA80291.1| YKELSRK%:PHOS:::PHOS:::%sample\_1%compd\_2404

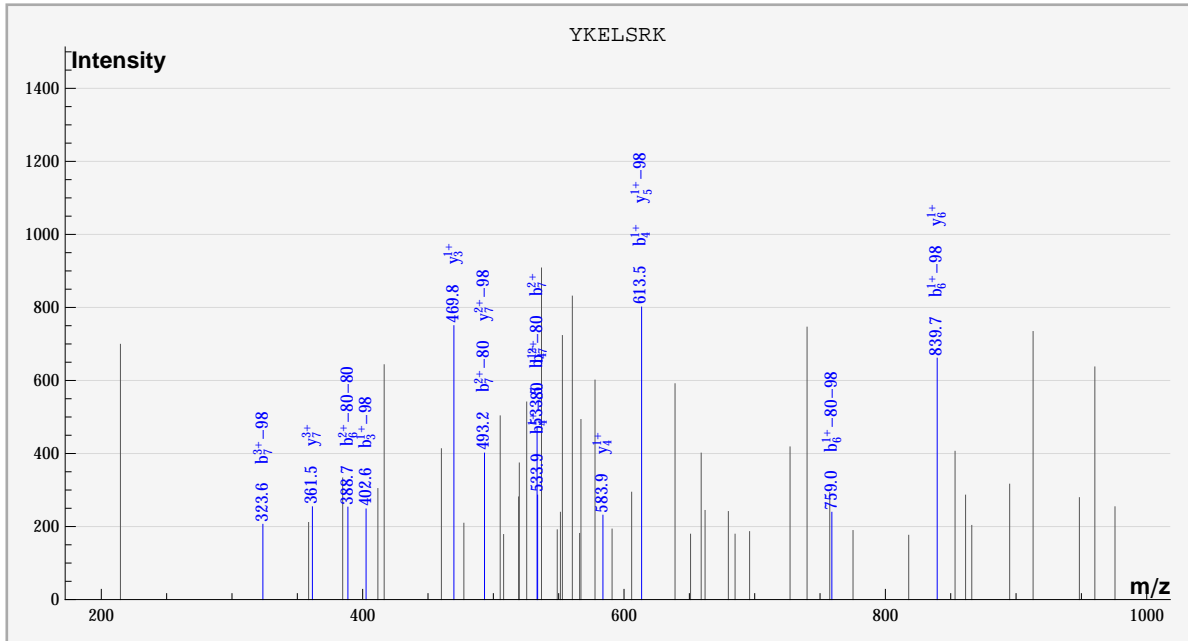

|   | # | b | b* | # | y | y* | P | P* |
|---|---|---|----|---|---|----|---|----|
| Y | 1 |   |    |   |   |    | ✓ | ✓  |
| K | 2 |   |    | 6 | ✓ |    |   |    |
| E | 3 | ✓ | ✓  | 5 |   | ✓  |   |    |
| L | 4 | ✓ | ✓  | 4 | ✓ |    |   |    |
| S | 5 |   |    | 3 | ✓ |    |   |    |
| R | 6 |   | ✓  | 2 |   |    |   |    |
| K | 7 | ✓ | ✓  | 1 |   |    |   |    |

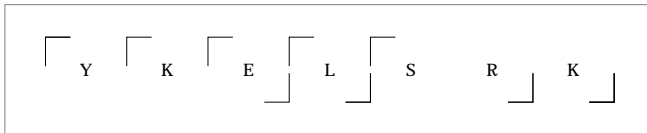

dbValid true RPYFVSR PHOS(2) 2. 544. -1.27755 4.93066 100. ? 4536.

S\_Acido\_new%gil68566781|gb|AA79710.1| RPYFVSR%:::PHOS:::PHOS::%sample\_1%compd\_3031

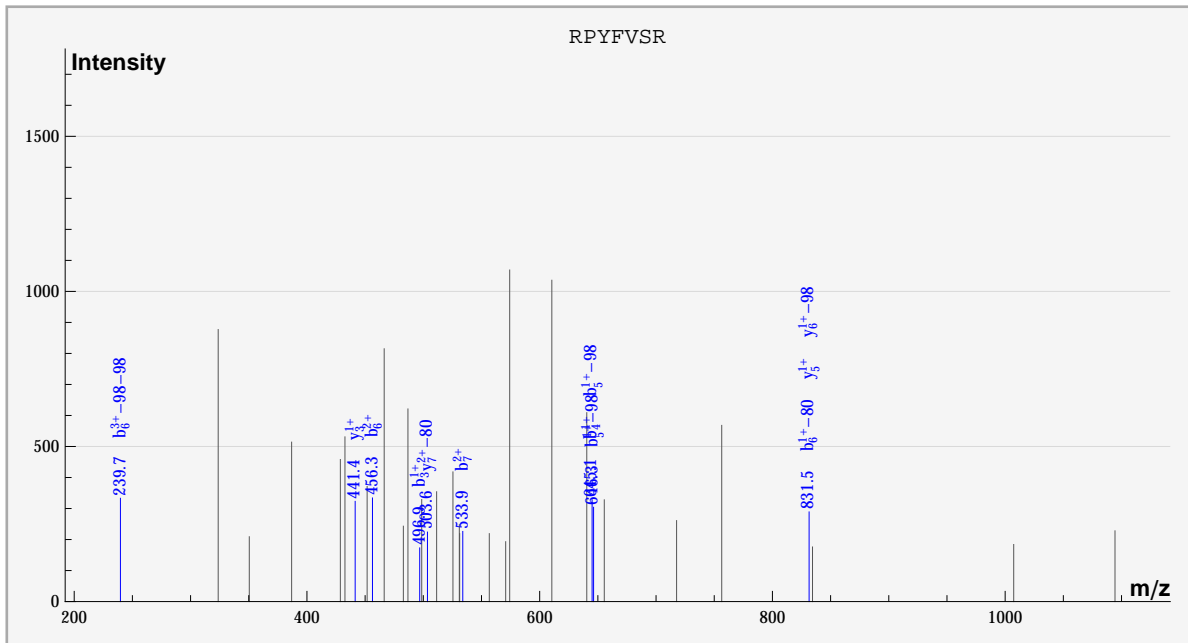

|   | # | b | b* | # | y | y* | P | P* |
|---|---|---|----|---|---|----|---|----|
| R | 1 |   |    |   |   |    |   | ✓  |
| P | 2 |   |    | 6 |   | ✓  |   |    |
| Y | 3 | ✓ |    | 5 | ✓ |    |   |    |
| F | 4 | ✓ |    | 4 |   |    |   |    |
| V | 5 |   | ✓  | 3 | ✓ |    |   |    |
| S | 6 | ✓ | ✓  | 2 |   |    |   |    |
| R | 7 | ✓ |    | 1 |   |    |   |    |

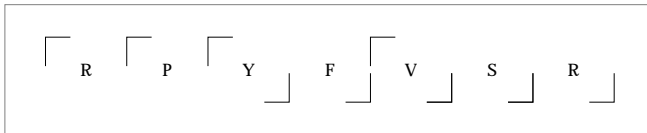

dbValid true VLNESSNRS PHOS(1) 2. 544.51 -1.27522 5.05621 100. ? 2334.

S\_Acido\_new%gi|68567368|gb|AAY80297.1| VLNESSNRS%:.....:PHOS:%sample\_1%cmpd\_998

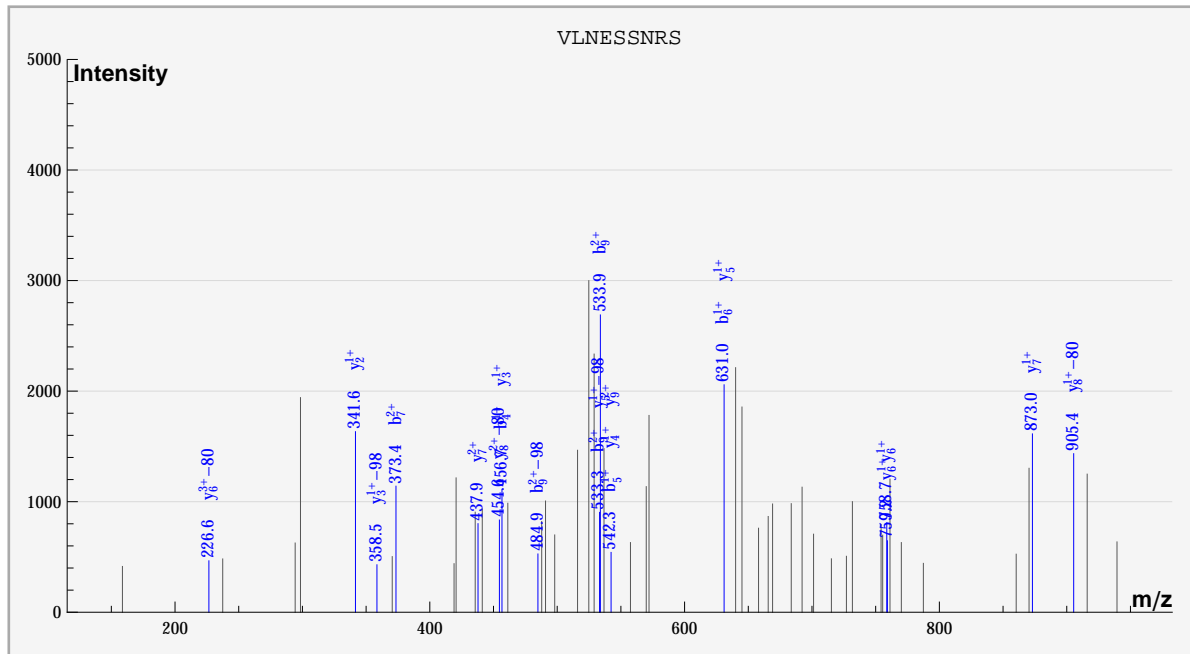

|   | # | b | b* | # | y | y* | P | P* |
|---|---|---|----|---|---|----|---|----|
| V | 1 |   |    |   |   |    |   | ✓  |
| L | 2 |   |    | 8 |   | ✓  |   |    |
| N | 3 |   |    | 7 | ✓ |    |   |    |
| E | 4 | ✓ |    | 6 | ✓ | ✓  |   |    |
| S | 5 | ✓ |    | 5 | ✓ | ✓  |   |    |
| S | 6 | ✓ |    | 4 | ✓ |    |   |    |
| N | 7 | ✓ |    | 3 | ✓ | ✓  |   |    |
| R | 8 |   |    | 2 | ✓ |    |   |    |
| S | 9 | ✓ | ✓  | 1 |   |    |   |    |

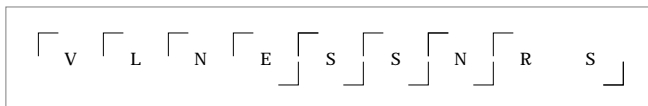

dbValid true KNLHSALSH PHOS(1) 2. 545. -1.24178 5.31539 100. ? 1704.  
 S\_Acido\_new%gi|68567033|gb|AAY79962.1| KNLHSALSH%:::::PHOS:::::sample\_1%cmpd\_437

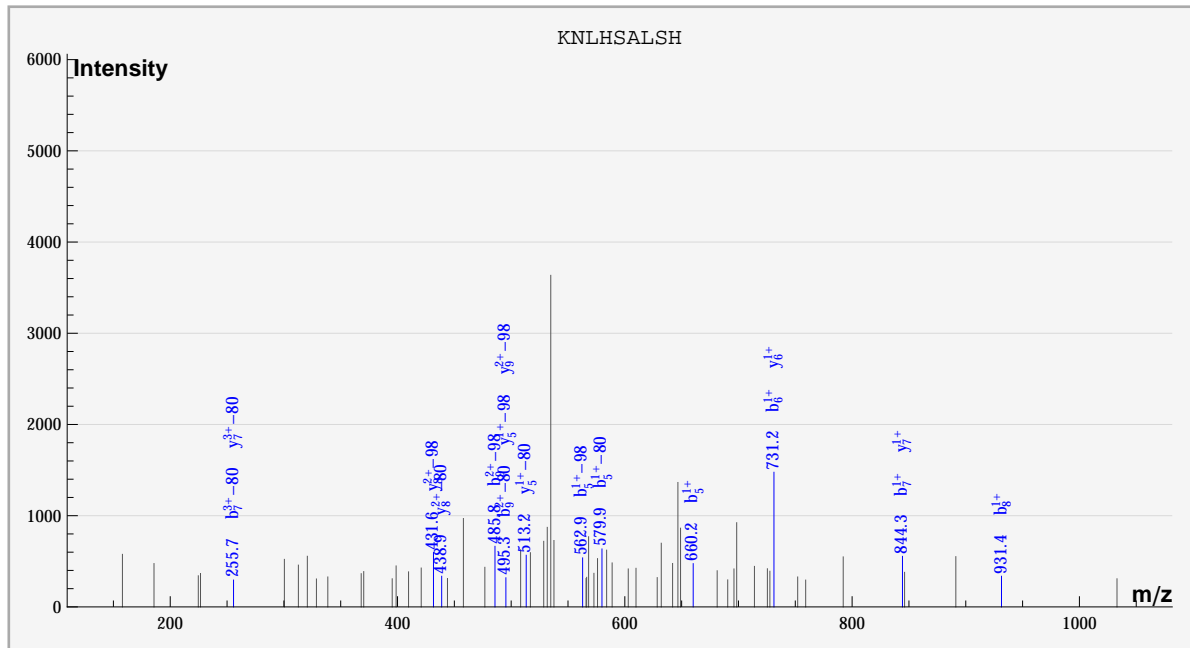

|   | # | b | b* | # | y | y* | P | P* |
|---|---|---|----|---|---|----|---|----|
| K | 1 |   |    |   |   |    |   | ✓  |
| N | 2 |   |    | 8 |   | ✓  |   |    |
| L | 3 |   |    | 7 | ✓ | ✓  |   |    |
| H | 4 |   |    | 6 | ✓ |    |   |    |
| S | 5 | ✓ | ✓  | 5 |   | ✓  |   |    |
| A | 6 | ✓ |    | 4 |   |    |   |    |
| L | 7 | ✓ | ✓  | 3 |   |    |   |    |
| S | 8 | ✓ |    | 2 |   |    |   |    |
| H | 9 |   | ✓  | 1 |   |    |   |    |

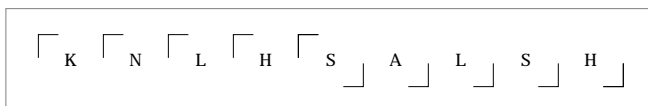

dbValid true IDFLASLAR PHOS(1) 2. 545. -1.72684 5.72077 100. ? 1872.  
 S\_Acido\_new%gi|68567749|gb|AAY80678.1| IDFLASLAR%:::PHOS:::sample\_1%cmpd\_591

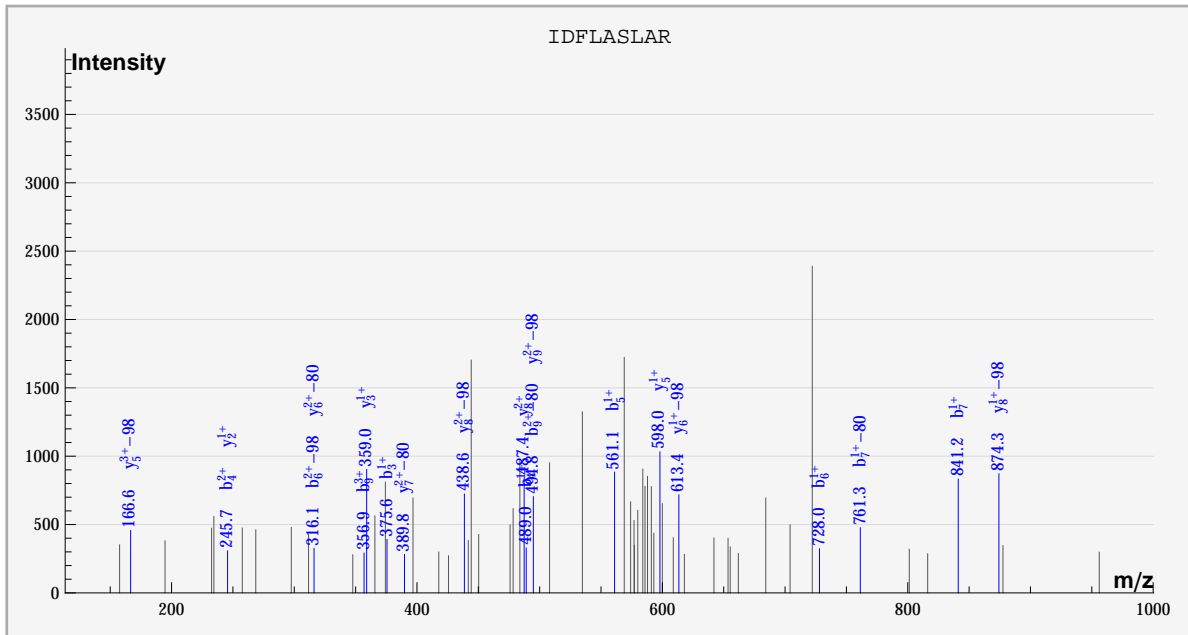

|   | # | b | b* | # | y | y* | P | P* |
|---|---|---|----|---|---|----|---|----|
| I | 1 |   |    |   |   |    |   | ✓  |
| D | 2 |   |    | 8 | ✓ | ✓  |   |    |
| F | 3 | ✓ |    | 7 |   | ✓  |   |    |
| L | 4 | ✓ |    | 6 |   | ✓  |   |    |
| A | 5 | ✓ |    | 5 | ✓ | ✓  |   |    |
| S | 6 | ✓ | ✓  | 4 |   |    |   |    |
| L | 7 | ✓ | ✓  | 3 | ✓ |    |   |    |
| A | 8 |   |    | 2 | ✓ |    |   |    |
| R | 9 | ✓ | ✓  | 1 |   |    |   |    |

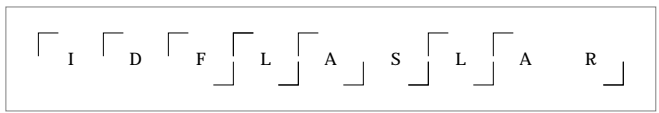

dbValid true DIKFATSVK PHOS(1) 2. 545. -0.227003 5.11886 100. ? 1968.  
 S\_Acido\_new%g|68567556|g|AAY80485.1| DIKFATSVK%:::PHOS:::sample\_0%cmpd\_634

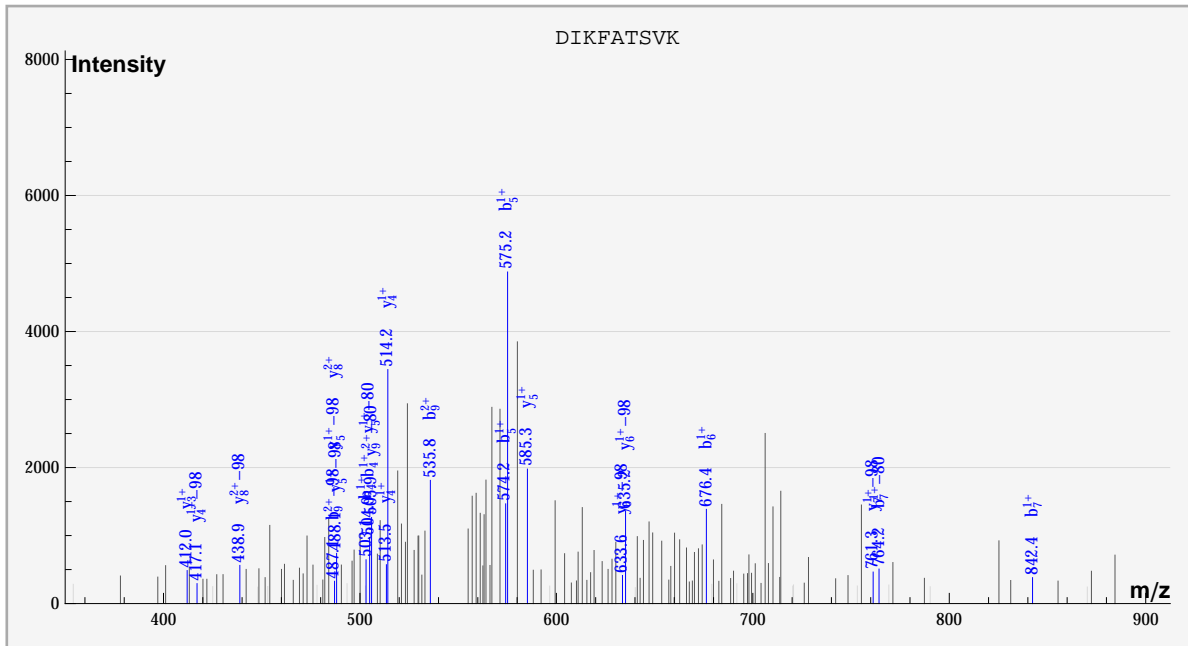

|   | # | b | b* | # | y | y* | P | P* |
|---|---|---|----|---|---|----|---|----|
| D | 1 |   |    |   |   |    |   | ✓  |
| I | 2 |   |    | 8 | ✓ | ✓  |   |    |
| K | 3 |   |    | 7 |   | ✓  |   |    |
| F | 4 | ✓ |    | 6 |   | ✓  |   |    |
| A | 5 | ✓ |    | 5 | ✓ | ✓  |   |    |
| T | 6 | ✓ |    | 4 | ✓ | ✓  |   |    |
| S | 7 | ✓ | ✓  | 3 | ✓ |    |   |    |
| V | 8 |   |    | 2 |   |    |   |    |
| K | 9 | ✓ | ✓  | 1 |   |    |   |    |

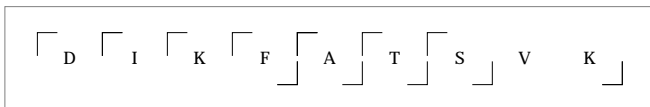



dbValid true RDIGSGTSGR PHOS(1) 2. 545. -1.75961 5.22779 100. ? 1968.  
 S\_Acido\_new%gi68568399|gb|AAy81328.1| RDIGSGTSGR%:::PHOS:::sample\_1%compd\_680

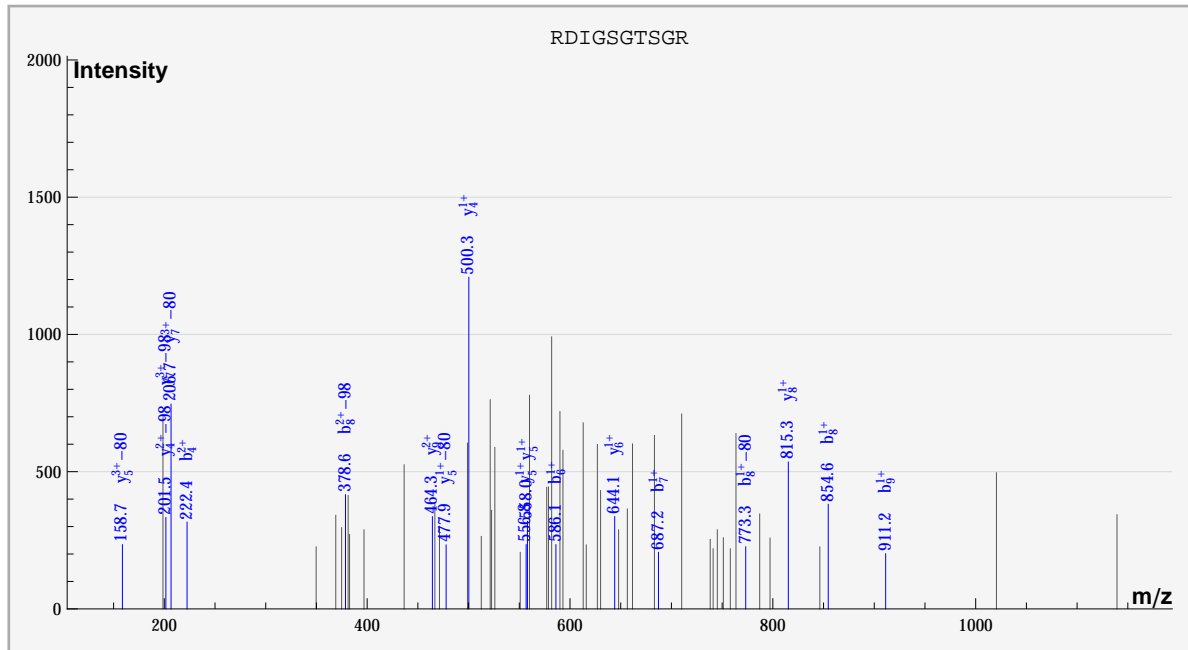

|   | #  | b | b* | # | y | y* | P | P* |
|---|----|---|----|---|---|----|---|----|
| R | 1  |   |    |   |   |    |   |    |
| D | 2  |   |    | 9 | ✓ |    |   |    |
| I | 3  |   |    | 8 | ✓ |    |   |    |
| G | 4  | ✓ |    | 7 |   | ✓  |   |    |
| S | 5  |   |    | 6 | ✓ |    |   |    |
| G | 6  | ✓ |    | 5 | ✓ | ✓  |   |    |
| T | 7  | ✓ |    | 4 | ✓ | ✓  |   |    |
| S | 8  | ✓ | ✓  | 3 |   |    |   |    |
| G | 9  | ✓ |    | 2 |   |    |   |    |
| R | 10 |   |    | 1 |   |    |   |    |

R D I G S G T S G R

dbValid true YHWGITR PHOS(2) 2. 545. 1.7068 5.45581 100. ? 2268.  
 S\_Acido\_new%gi|68567236|gb|AA80165.1| YHWGITR%:PHOS:::PHOS::%sample\_2%compd\_908

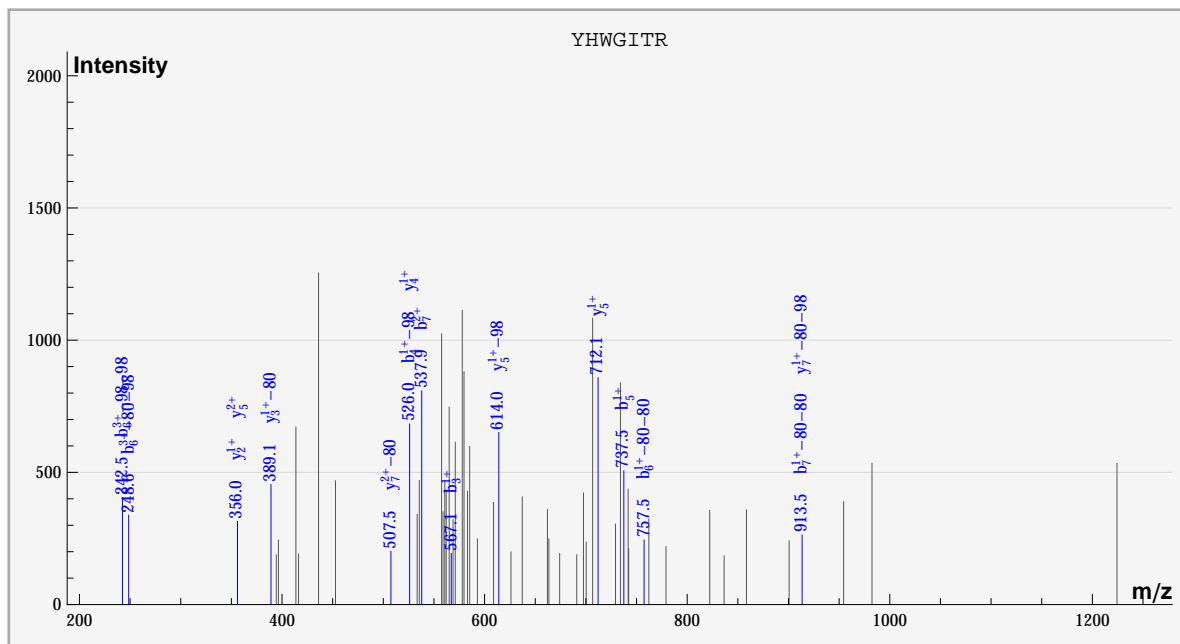

|   | # | b | b* | # | y | y* | P | P* |
|---|---|---|----|---|---|----|---|----|
| Y | 1 |   |    |   |   |    |   | ✓  |
| H | 2 |   |    | 6 |   |    |   |    |
| W | 3 | ✓ |    | 5 | ✓ | ✓  |   |    |
| G | 4 |   | ✓  | 4 | ✓ |    |   |    |
| I | 5 | ✓ |    | 3 |   | ✓  |   |    |
| T | 6 |   | ✓  | 2 | ✓ |    |   |    |
| R | 7 | ✓ | ✓  | 1 |   |    |   |    |

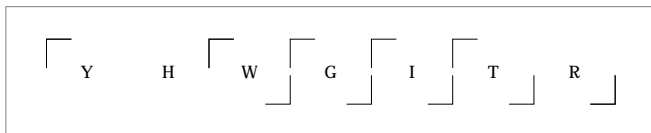



dbValid true YYDETR PHOS(3) 2. 545. -1.36549 5.3254 100. ? 3678.  
 S\_Acido\_new%gii68566560|gb|AA79489.1| YYDETR%:PHOS:PHOS::PHOS::%sample\_1%compd\_2252

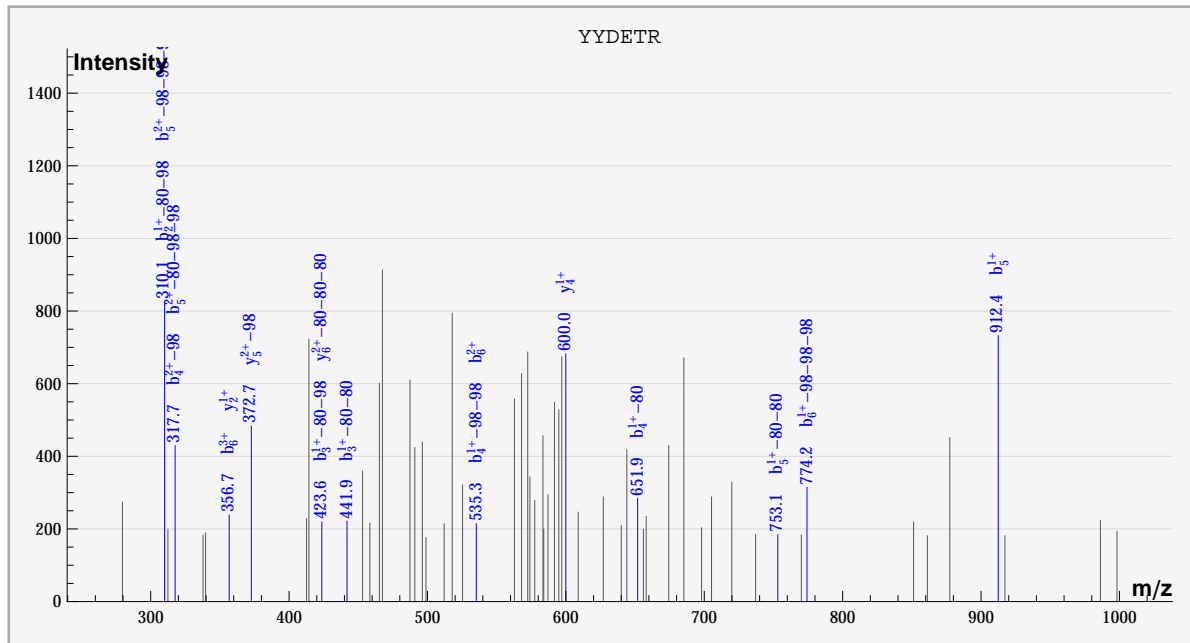

|   | # | b | b* | # | y | y* | P | P* |
|---|---|---|----|---|---|----|---|----|
| Y | 1 |   |    |   |   |    |   | ✓  |
| Y | 2 | ✓ |    | 5 |   | ✓  |   |    |
| D | 3 | ✓ |    | 4 | ✓ |    |   |    |
| E | 4 | ✓ |    | 3 |   |    |   |    |
| T | 5 | ✓ | ✓  | 2 | ✓ |    |   |    |
| R | 6 | ✓ | ✓  | 1 |   |    |   |    |

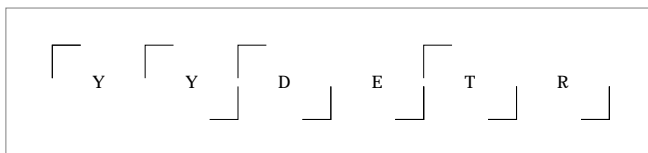

dbValid true LLIEKYTK PHOS(1) 2. 545. -0.706433 5.01109 100. ? 4512.

S\_Acido\_new%gi|68566561|gb|AAY79490.1| LLIEKYTK%::::::PHOS::%sample\_1%compd\_3010

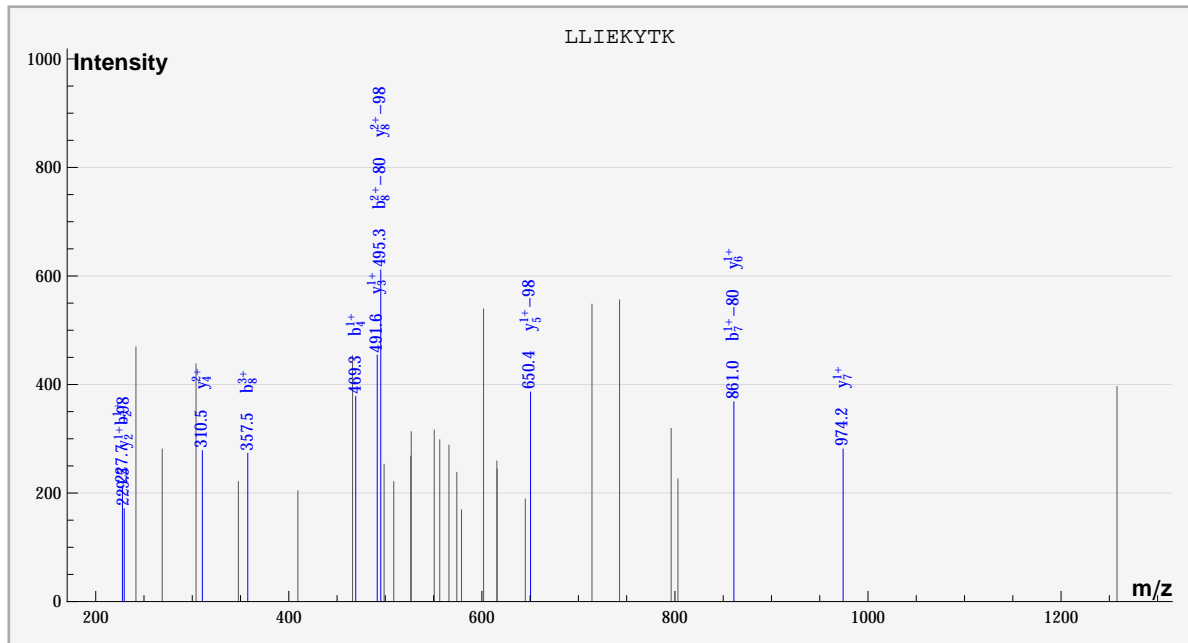

|   | # | b | b* | # | y | y* | P | P* |
|---|---|---|----|---|---|----|---|----|
| L | 1 |   |    |   |   |    |   | ✓  |
| L | 2 | ✓ |    | 7 | ✓ |    |   |    |
| I | 3 |   |    | 6 | ✓ |    |   |    |
| E | 4 | ✓ |    | 5 |   | ✓  |   |    |
| K | 5 |   |    | 4 | ✓ |    |   |    |
| Y | 6 |   |    | 3 | ✓ |    |   |    |
| T | 7 |   | ✓  | 2 |   | ✓  |   |    |
| K | 8 | ✓ | ✓  | 1 |   |    |   |    |

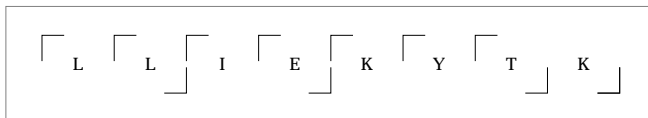

dbValid true YITTQMR Oxidation\_M(1),PHOS(2) 2. 546. -1.30222 5.01838 100. ? 2862.  
 S\_Acido\_new%gi|68568411|gb|AAy81340.1| YITTQMR%:PHOS::PHOS::Oxidation\_M::%sample\_1%compd\_1500

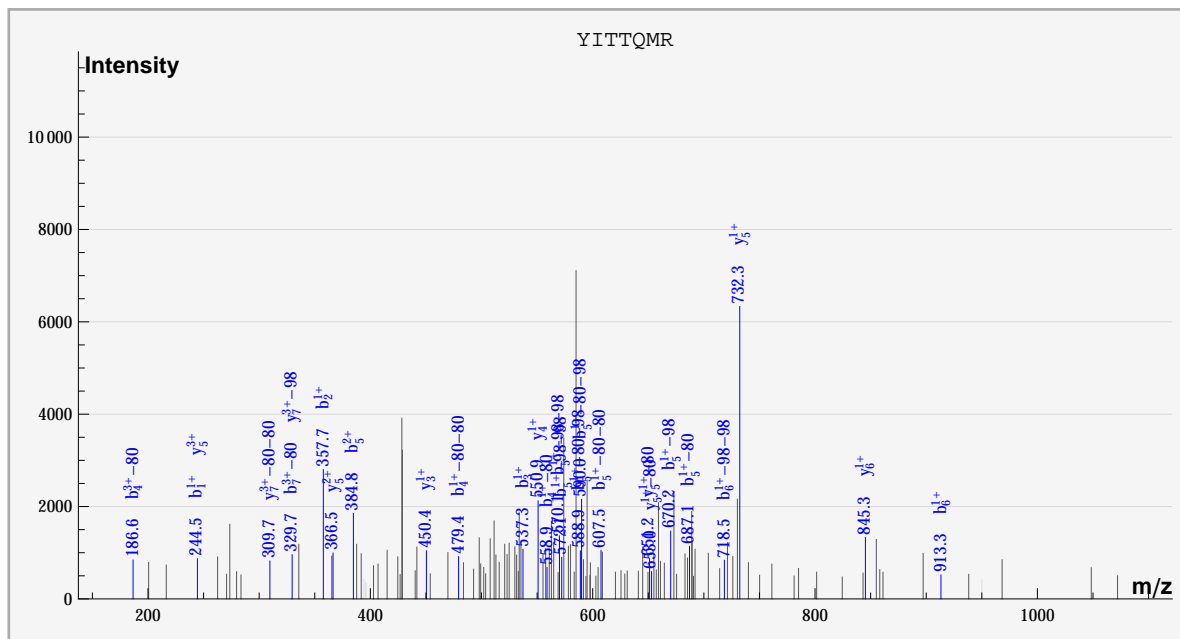

|   | # | b | b* | # | y | y* | P | P* |
|---|---|---|----|---|---|----|---|----|
| Y | 1 | ✓ |    |   |   |    |   | ✓  |
| I | 2 | ✓ |    | 6 | ✓ |    |   |    |
| T | 3 | ✓ |    | 5 | ✓ | ✓  |   |    |
| T | 4 |   | ✓  | 4 | ✓ |    |   |    |
| Q | 5 | ✓ | ✓  | 3 | ✓ |    |   |    |
| M | 6 | ✓ | ✓  | 2 |   |    |   |    |
| R | 7 |   | ✓  | 1 |   |    |   |    |

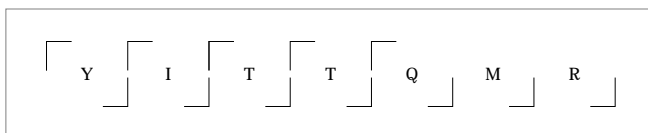

dbValid true YTEEMLK Oxidation\_M(1),PHOS(2) 2. 546. -0.815833 5.75701 100. ? 3102.

S\_Acido\_new%gil68567786|gb|AAy80715.1| YTEEMLK%:PHOS:PHOS::Oxidation\_M::%sample\_1%compd\_1721

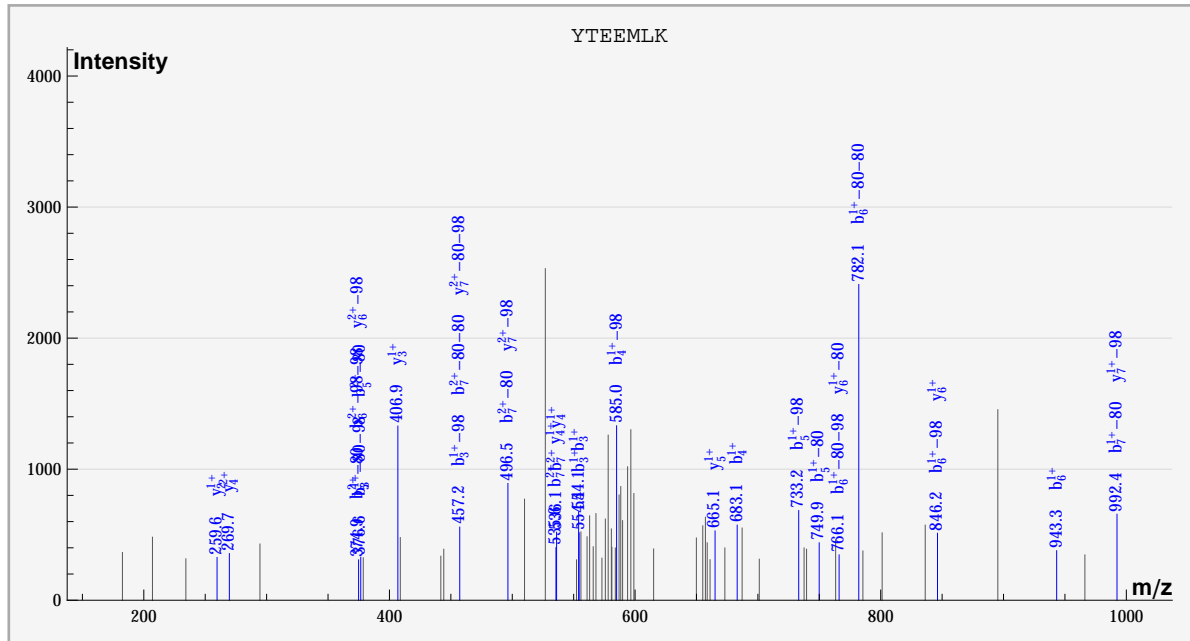

|   | # | b | b* | # | y | y* | P | P* |
|---|---|---|----|---|---|----|---|----|
| Y | 1 |   |    |   |   |    |   | ✓  |
| T | 2 |   |    | 6 | ✓ | ✓  |   |    |
| E | 3 | ✓ | ✓  | 5 | ✓ |    |   |    |
| E | 4 | ✓ | ✓  | 4 | ✓ |    |   |    |
| M | 5 |   | ✓  | 3 | ✓ |    |   |    |
| L | 6 | ✓ | ✓  | 2 | ✓ |    |   |    |
| K | 7 | ✓ | ✓  | 1 |   |    |   |    |

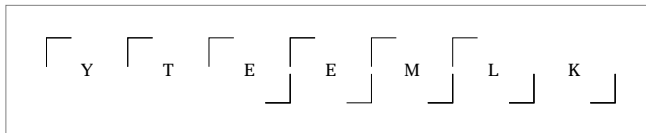

dbValid true ELYTKILK PHOS(1) 2. 546. -1.70643 5.24235 100. ? 3870.  
 S\_Acido\_new%gi|68566628|gb|AAY79557.1| ELYTKILK%:::PHOS:::sample\_1%compd\_2429

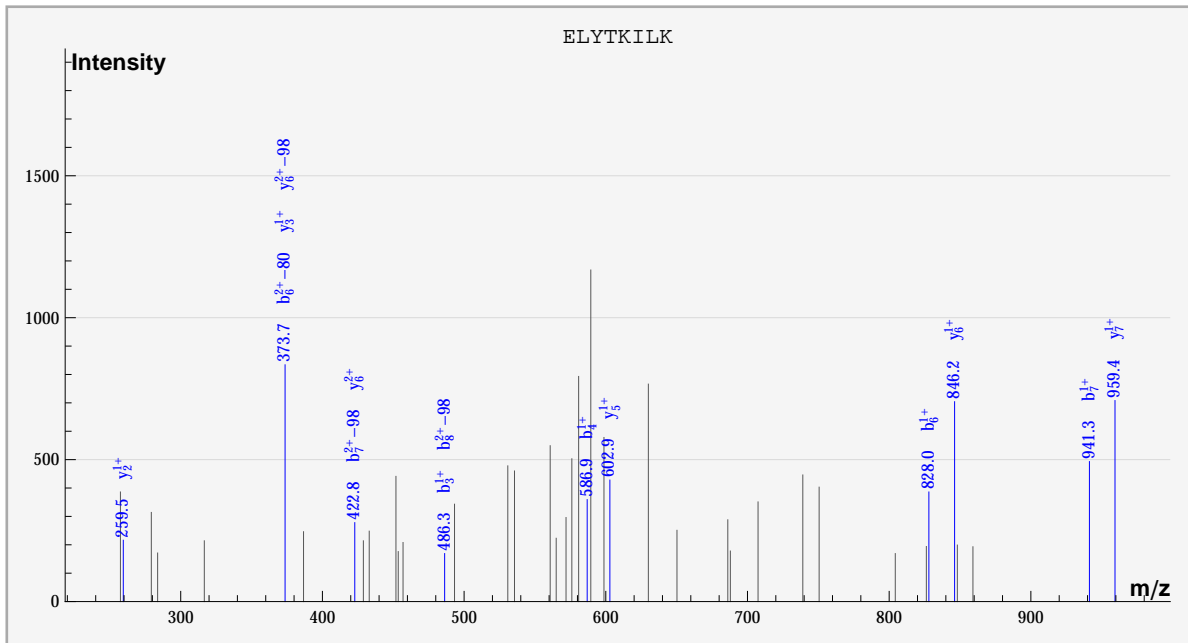

|   | # | b | b* | # | y | y* | P | P* |
|---|---|---|----|---|---|----|---|----|
| E | 1 |   |    |   |   |    |   |    |
| L | 2 |   |    | 7 | ✓ |    |   |    |
| Y | 3 | ✓ |    | 6 | ✓ | ✓  |   |    |
| T | 4 | ✓ |    | 5 | ✓ |    |   |    |
| K | 5 |   |    | 4 |   |    |   |    |
| I | 6 | ✓ | ✓  | 3 | ✓ |    |   |    |
| L | 7 | ✓ | ✓  | 2 | ✓ |    |   |    |
| K | 8 |   | ✓  | 1 |   |    |   |    |

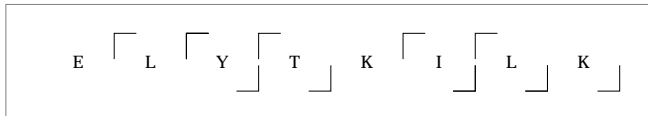



dbValid true SYGLNANLR PHOS(1) 2. 546. -1.74977 4.96239 100. ? 4668.  
 S\_Acido\_new%gi|68566838|gb|AA79767.1| SYGLNANLR::PHOS:::sample\_1%cmpd\_3154

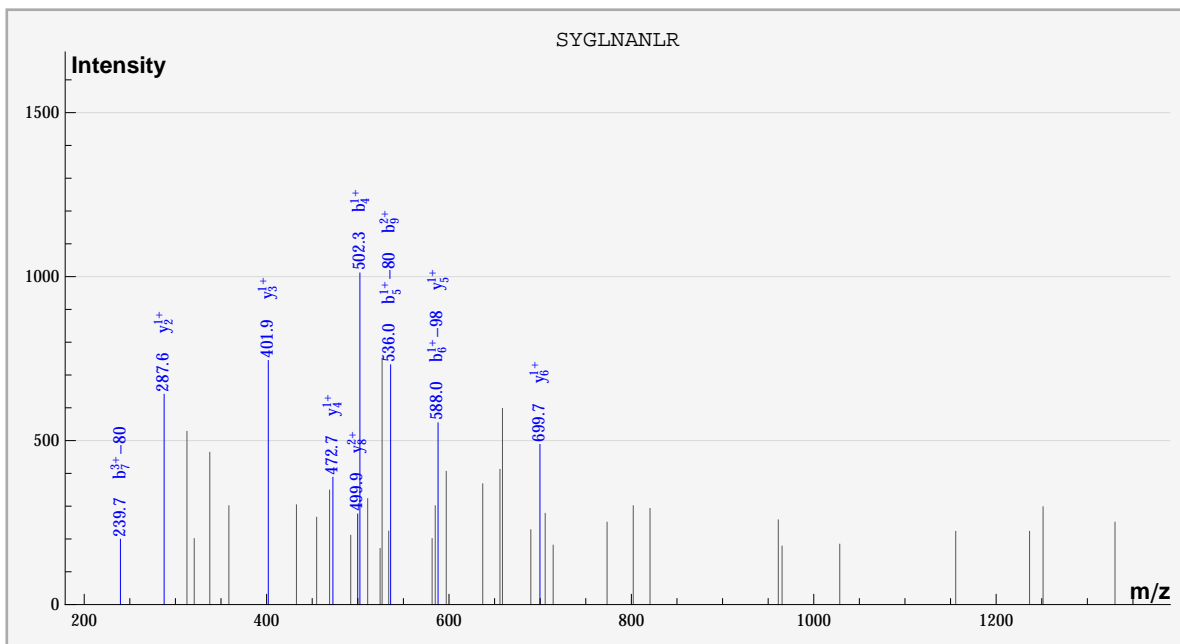

|   | # | b | b* | # | y | y* | P | P* |
|---|---|---|----|---|---|----|---|----|
| S | 1 |   |    |   |   |    |   |    |
| Y | 2 |   |    | 8 |   | ✓  |   |    |
| G | 3 |   |    | 7 |   |    |   |    |
| L | 4 | ✓ |    | 6 |   | ✓  |   |    |
| N | 5 |   | ✓  | 5 |   | ✓  |   |    |
| A | 6 |   | ✓  | 4 |   | ✓  |   |    |
| N | 7 |   | ✓  | 3 |   | ✓  |   |    |
| L | 8 |   |    | 2 |   | ✓  |   |    |
| R | 9 | ✓ |    | 1 |   |    |   |    |

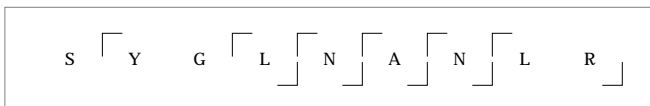

dbValid true INSDGSVYR PHOS(1) 2. 547. -1.26813 4.95408 100. ? 2670.  
 S\_Acido\_new%gil68568702|gb|AAy81631.1| INSDGSVYR%:::PHOS::%sample\_1%compd\_1325

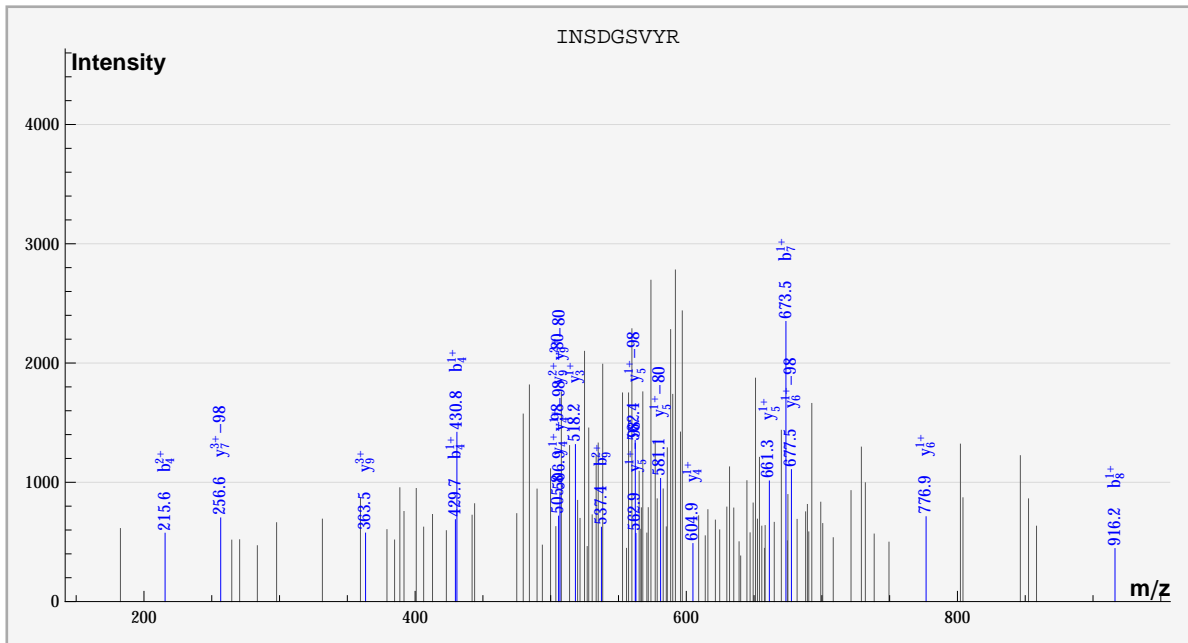

|   | # | b | b* | # | y | y* | P | P* |
|---|---|---|----|---|---|----|---|----|
| I | 1 |   |    |   |   |    | ✓ | ✓  |
| N | 2 |   |    | 8 |   |    |   |    |
| S | 3 |   |    | 7 |   | ✓  |   |    |
| D | 4 | ✓ |    | 6 | ✓ | ✓  |   |    |
| G | 5 |   |    | 5 | ✓ | ✓  |   |    |
| S | 6 |   |    | 4 | ✓ | ✓  |   |    |
| V | 7 | ✓ |    | 3 | ✓ |    |   |    |
| Y | 8 | ✓ |    | 2 |   |    |   |    |
| R | 9 | ✓ |    | 1 |   |    |   |    |

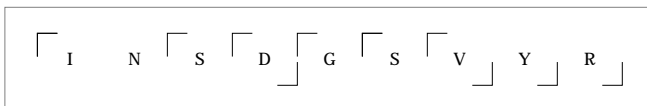

dbValid true RKAGISIIR PHOS(1) 2. 547. 0.315697 5.51476 100. ? 2898.  
 S\_Acido\_new%gi|68566525|gb|AA79454.1| RKAGISIIR%:::PHOS:::sample\_1%compd\_1534

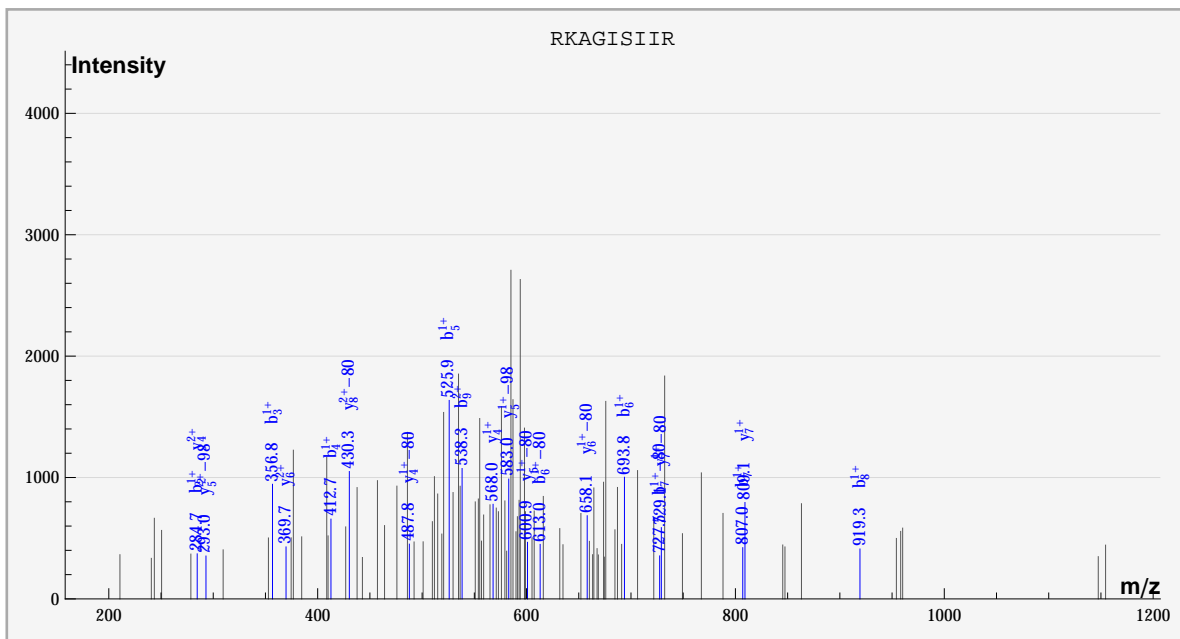

|   | # | b | b* | # | y | y* | P | P* |
|---|---|---|----|---|---|----|---|----|
| R | 1 |   |    |   |   |    |   |    |
| K | 2 | ✓ |    | 8 |   | ✓  |   |    |
| A | 3 | ✓ |    | 7 | ✓ | ✓  |   |    |
| G | 4 | ✓ |    | 6 | ✓ | ✓  |   |    |
| I | 5 | ✓ |    | 5 |   | ✓  |   |    |
| S | 6 | ✓ | ✓  | 4 | ✓ | ✓  |   |    |
| I | 7 | ✓ | ✓  | 3 |   |    |   |    |
| I | 8 | ✓ |    | 2 |   |    |   |    |
| R | 9 | ✓ |    | 1 |   |    |   |    |

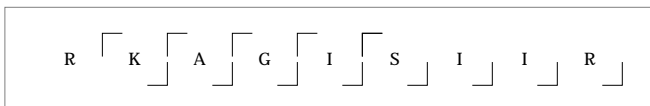

dbValid true VNVQTVVTR PHOS(1) 2. 548. 0.281527 5.51029 100. ? 1170.  
 S\_Acido\_new%gi|68567881|gb|AAy80810.1| VNVQTVVTR%:::PHOS::%sample\_1%compd\_3786

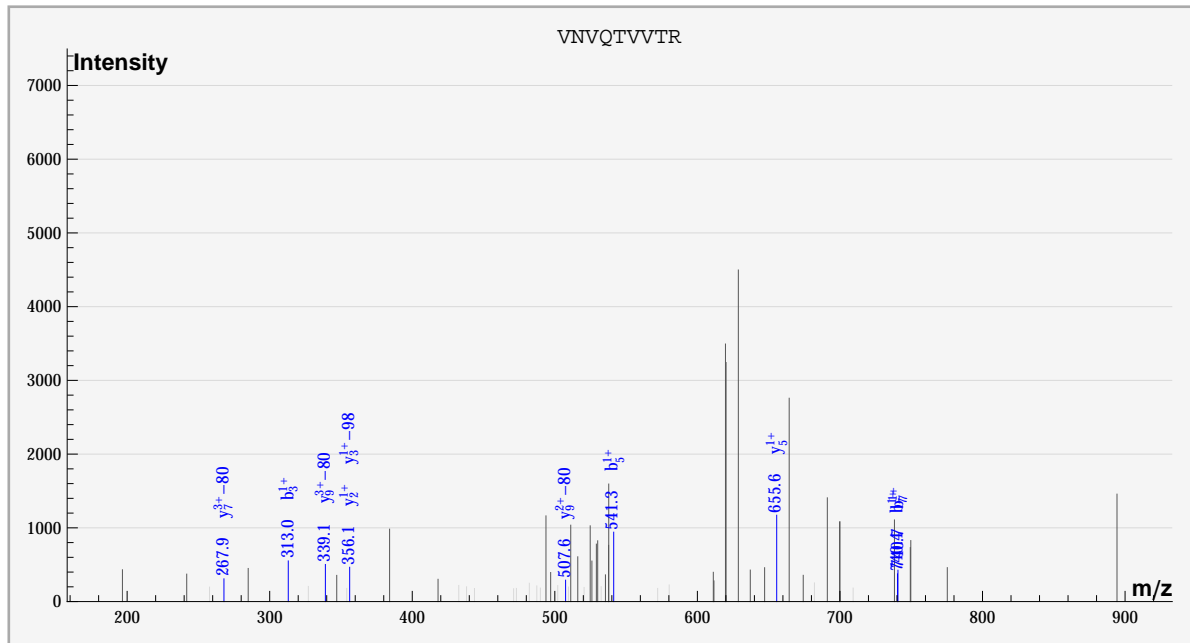

|   | # | b | b* | # | y | y* | P | P* |
|---|---|---|----|---|---|----|---|----|
| V | 1 |   |    |   |   |    |   | ✓  |
| N | 2 |   |    | 8 |   |    |   |    |
| V | 3 | ✓ |    | 7 |   | ✓  |   |    |
| Q | 4 |   |    | 6 |   |    |   |    |
| T | 5 | ✓ |    | 5 |   | ✓  |   |    |
| V | 6 |   |    | 4 |   |    |   |    |
| V | 7 | ✓ |    | 3 |   | ✓  |   |    |
| T | 8 |   |    | 2 |   | ✓  |   |    |
| R | 9 |   |    | 1 |   |    |   |    |

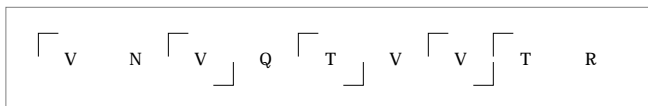

dbValid true KLYSGSKR PHOS(2) 2. 548. 1.74084 4.95877 100. ? 1590.  
 S\_Acido\_new%gi|68567861|gb|AAy80790.1| KLYSGSKR%:::PHOS::PHOS:::sample\_1%compd\_333

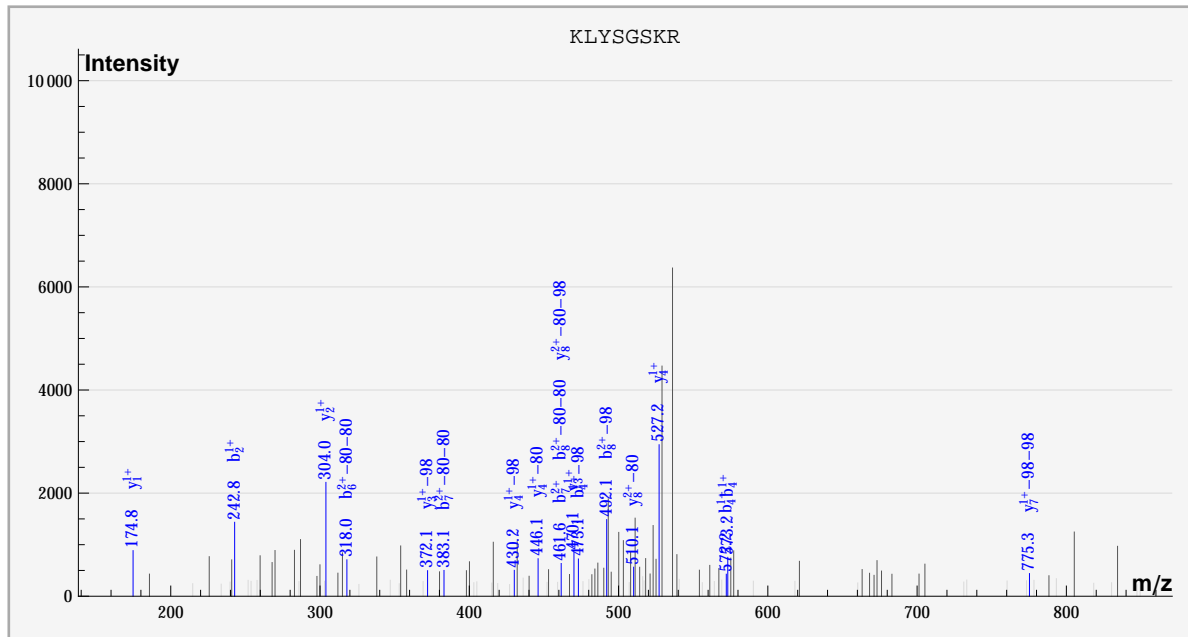

|   | # | b | b* | # | y | y* | P | P* |
|---|---|---|----|---|---|----|---|----|
| K | 1 |   |    |   |   |    |   | ✓  |
| L | 2 | ✓ |    | 7 |   | ✓  |   |    |
| Y | 3 |   |    | 6 |   |    |   |    |
| S | 4 | ✓ | ✓  | 5 |   |    |   |    |
| G | 5 |   |    | 4 | ✓ | ✓  |   |    |
| S | 6 |   | ✓  | 3 | ✓ | ✓  |   |    |
| K | 7 | ✓ | ✓  | 2 | ✓ |    |   |    |
| R | 8 |   | ✓  | 1 | ✓ |    |   |    |

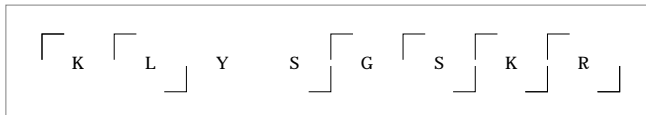

dbValid true YYAFQSR PHOS(2) 2. 549. -1.30918 5.00601 100. ? 1524.  
 S\_Acido\_new%gi|68566680|gb|AA79609.1| YYAFQSR%:PHOS:PHOS:.....%sample\_1%compd\_276

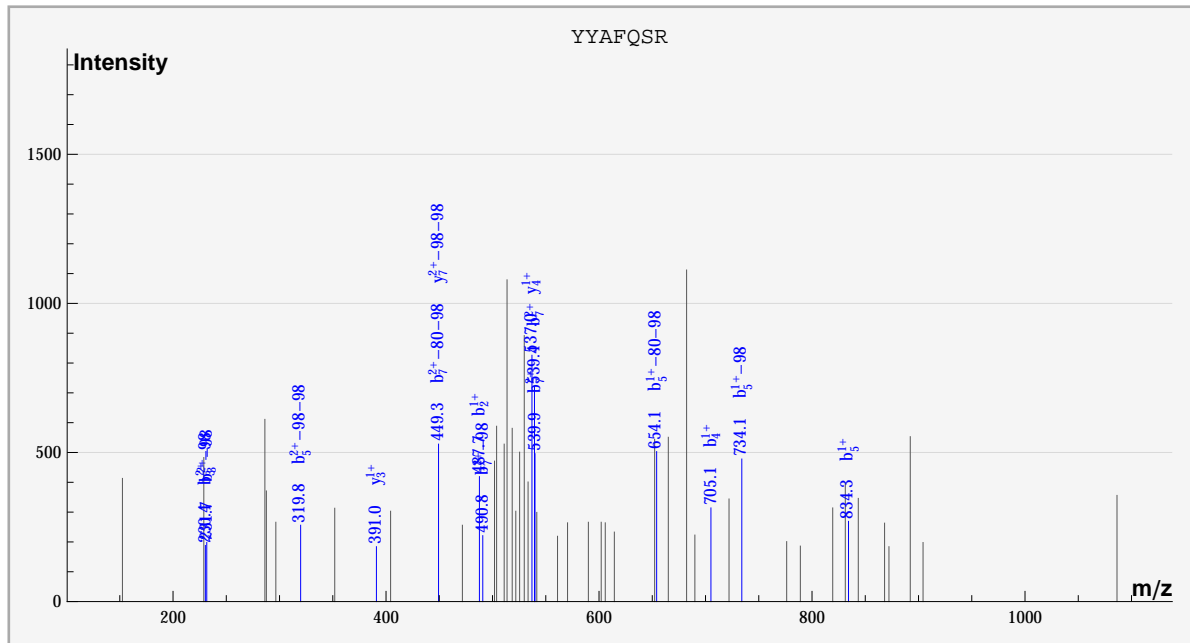

|   | # | b | b* | # | y | y* | P | P* |
|---|---|---|----|---|---|----|---|----|
| Y | 1 |   |    |   |   |    |   | ✓  |
| Y | 2 | ✓ |    | 6 |   |    |   |    |
| A | 3 |   | ✓  | 5 |   |    |   |    |
| F | 4 | ✓ |    | 4 | ✓ |    |   |    |
| Q | 5 | ✓ | ✓  | 3 | ✓ |    |   |    |
| S | 6 |   |    | 2 |   |    |   |    |
| R | 7 | ✓ | ✓  | 1 |   |    |   |    |

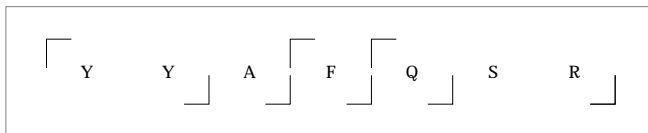

dbValid true YKIDGYVR PHOS(1) 2. 549. -1.74248 5.55681 100. ? 1872.

S\_Acido\_new%gi|68567446|gb|AAY80375.1| YKIDGYVR%:PHOS:::sample\_1%compd\_596

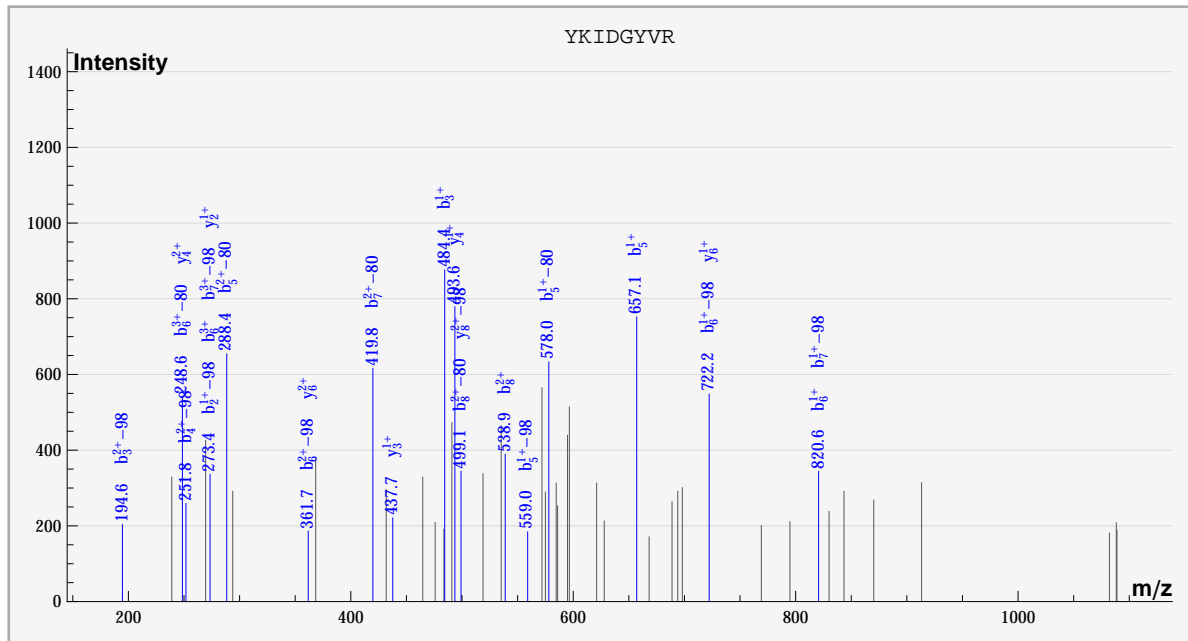

|   | # | b | b* | # | y | y* | P | P* |
|---|---|---|----|---|---|----|---|----|
| Y | 1 |   |    |   |   |    |   | ✓  |
| K | 2 |   | ✓  | 7 |   |    |   |    |
| I | 3 | ✓ | ✓  | 6 | ✓ |    |   |    |
| D | 4 |   | ✓  | 5 |   |    |   |    |
| G | 5 | ✓ | ✓  | 4 | ✓ |    |   |    |
| Y | 6 | ✓ | ✓  | 3 | ✓ |    |   |    |
| V | 7 |   | ✓  | 2 | ✓ |    |   |    |
| R | 8 | ✓ | ✓  | 1 |   |    |   |    |

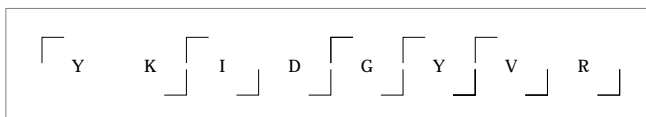

dbValid true EINRGASDR PHOS(1) 2. 549. 0.240387 5.14177 100. ? 2586.  
 S\_Acido\_new%gii68567113|gb|AAY80042.1| EINRGASDR%:::PHOS::%sample\_1%compd\_1250

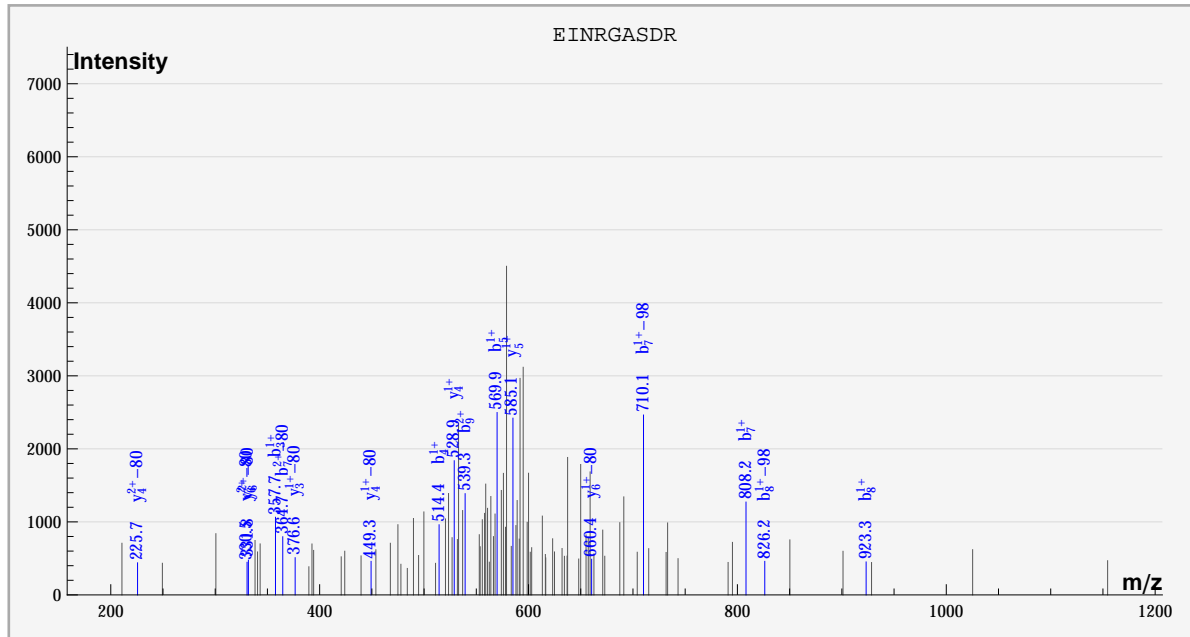

|   | # | b | b* | # | y | y* | P | P* |
|---|---|---|----|---|---|----|---|----|
| E | 1 |   |    |   |   |    |   |    |
| I | 2 |   |    | 8 |   |    |   |    |
| N | 3 | ✓ |    | 7 |   |    |   |    |
| R | 4 | ✓ |    | 6 |   | ✓  |   |    |
| G | 5 | ✓ |    | 5 | ✓ |    |   |    |
| A | 6 |   |    | 4 | ✓ | ✓  |   |    |
| S | 7 | ✓ | ✓  | 3 |   | ✓  |   |    |
| D | 8 | ✓ | ✓  | 2 |   |    |   |    |
| R | 9 | ✓ |    | 1 |   |    |   |    |

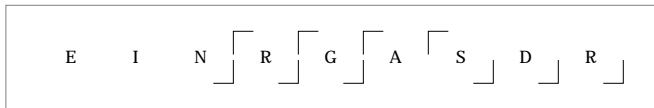



dbValid true YITTVLPK PHOS(2) 2. 549. -1.24966 4.93961 100. ? 2688.

S\_Acido\_new%gi|68566906|gb|AA79835.1| YITTVLPK%:PHOS::PHOS:::sample\_1%compd\_1290

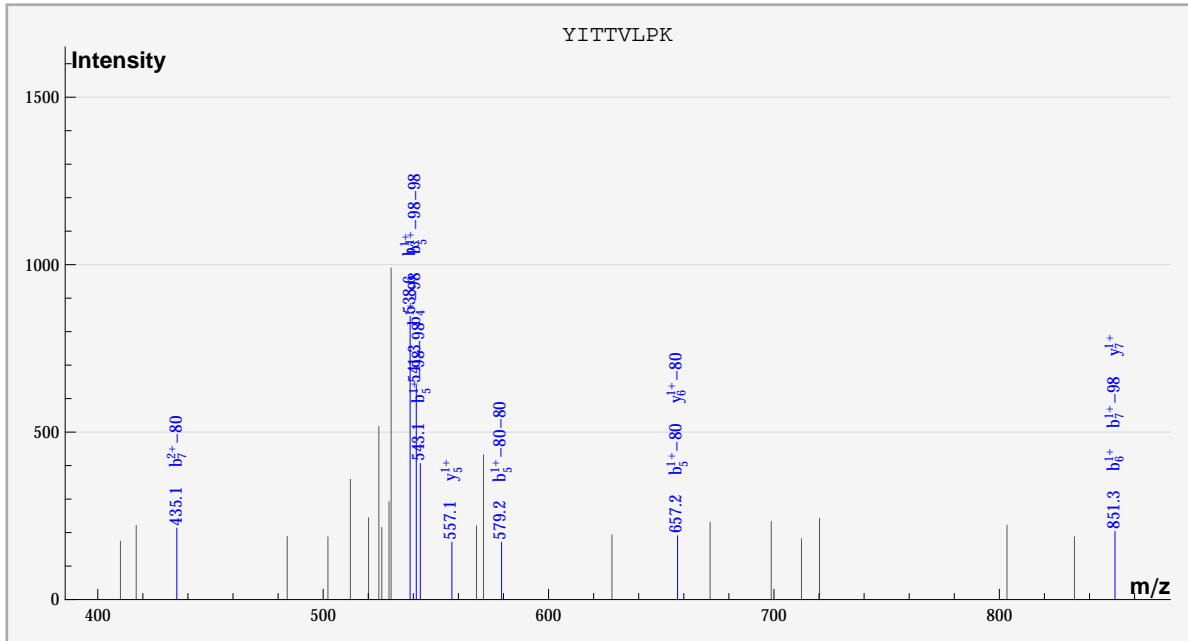

|   | # | b | b* | # | y | y* | P | P* |
|---|---|---|----|---|---|----|---|----|
| Y | 1 |   |    |   |   |    |   |    |
| I | 2 |   |    | 7 | ✓ |    |   |    |
| T | 3 | ✓ |    | 6 |   | ✓  |   |    |
| T | 4 |   | ✓  | 5 | ✓ |    |   |    |
| V | 5 |   | ✓  | 4 |   |    |   |    |
| L | 6 | ✓ |    | 3 |   |    |   |    |
| P | 7 |   | ✓  | 2 |   |    |   |    |
| K | 8 |   |    | 1 |   |    |   |    |

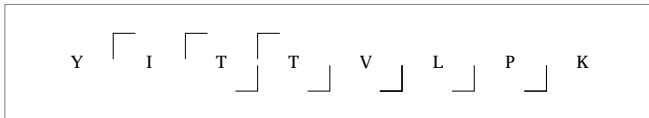

dbValid true KLIGELSEK PHOS(1) 2. 549. -0.213898 5.01292 100. ? 3972.  
 S\_Acido\_new%gi68568389|gb|AAY81318.1| KLIGELSEK%:::::PHOS:::%sample\_1%cmpd\_2520

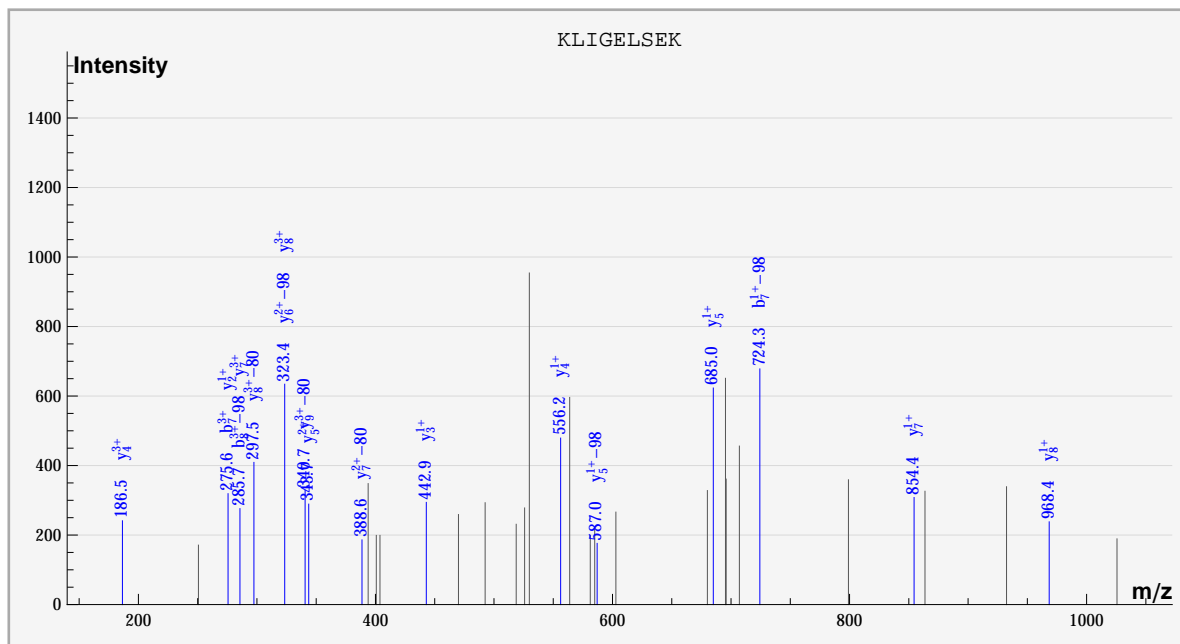

|   | # | b | b* | # | y | y* | P | P* |
|---|---|---|----|---|---|----|---|----|
| K | 1 |   |    |   |   |    |   | ✓  |
| L | 2 |   |    | 8 | ✓ | ✓  |   |    |
| I | 3 |   |    | 7 | ✓ | ✓  |   |    |
| G | 4 |   |    | 6 |   | ✓  |   |    |
| E | 5 |   |    | 5 | ✓ | ✓  |   |    |
| L | 6 |   |    | 4 | ✓ |    |   |    |
| S | 7 | ✓ | ✓  | 3 | ✓ |    |   |    |
| E | 8 |   | ✓  | 2 | ✓ |    |   |    |
| K | 9 |   |    | 1 |   |    |   |    |

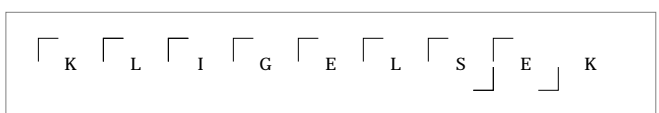

dbValid true DETNDESK PHOS(2) 2. 550. -0.842803 5.04376 100. ? 1800.  
 S\_Acido\_new%gil68567656|gb|AAY80585.1| DETNDESK%:::PHOS:::PHOS::%sample\_0%cmpd\_499

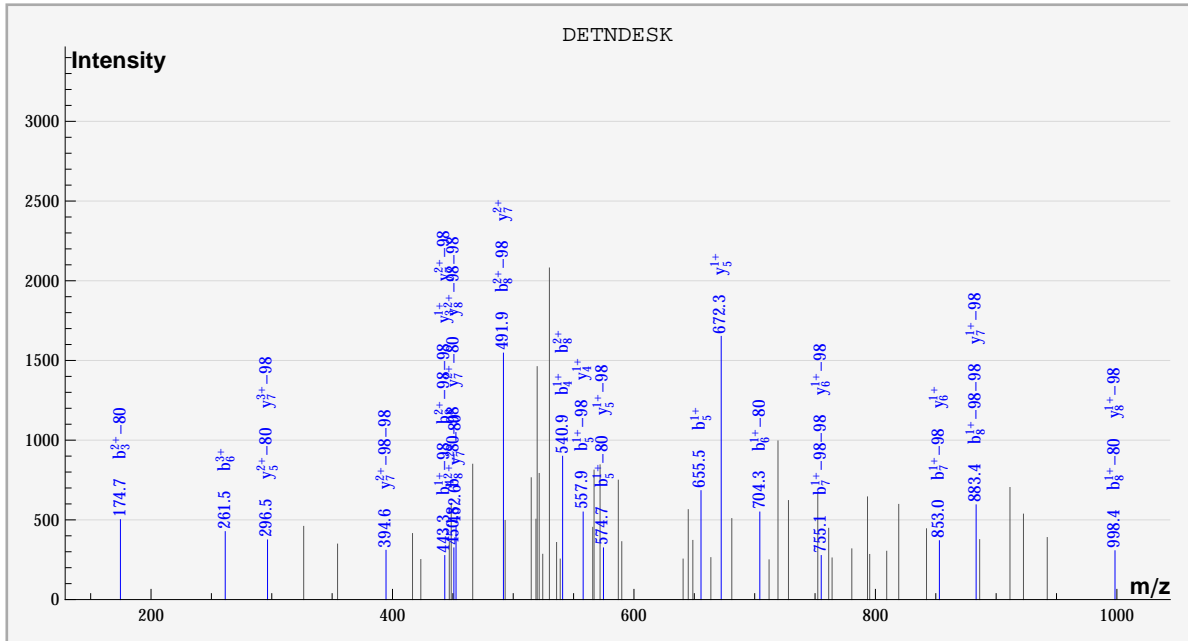

|   | # | b | b* | # | y | y* | P | P* |
|---|---|---|----|---|---|----|---|----|
| D | 1 |   |    |   |   |    |   | ✓  |
| E | 2 |   |    | 7 | ✓ | ✓  |   |    |
| T | 3 |   | ✓  | 6 | ✓ | ✓  |   |    |
| N | 4 | ✓ | ✓  | 5 | ✓ | ✓  |   |    |
| D | 5 | ✓ | ✓  | 4 | ✓ |    |   |    |
| E | 6 | ✓ | ✓  | 3 | ✓ |    |   |    |
| S | 7 |   | ✓  | 2 |   |    |   |    |
| K | 8 | ✓ | ✓  | 1 |   |    |   |    |

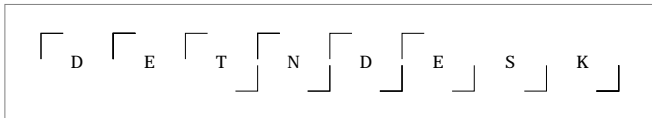

dbValid true MKKVPYLK Oxidation\_M(1),PHOS(1) 2. 550. 1.79013 5.45029 100. ? 2478.  
 S\_Acido\_new%gil68568620|gb|AAY81549.1| MKKVPYLK%:Oxidation\_M::::PHOS:::sample\_0%compd\_1084

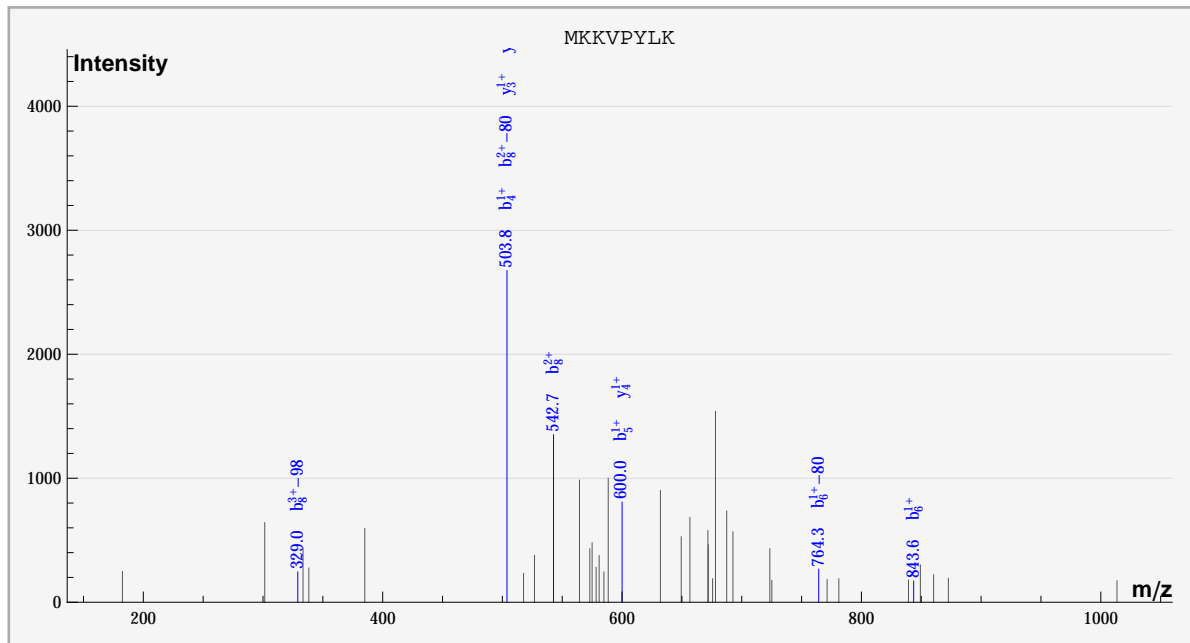

|   | # | b | b* | # | y | y* | P | P* |
|---|---|---|----|---|---|----|---|----|
| M | 1 |   |    |   |   |    |   | ✓  |
| K | 2 |   |    | 7 |   |    |   |    |
| K | 3 |   |    | 6 |   |    |   |    |
| V | 4 | ✓ |    | 5 |   |    |   |    |
| P | 5 | ✓ |    | 4 | ✓ |    |   |    |
| Y | 6 | ✓ | ✓  | 3 | ✓ |    |   |    |
| L | 7 |   |    | 2 |   |    |   |    |
| K | 8 | ✓ | ✓  | 1 |   |    |   |    |

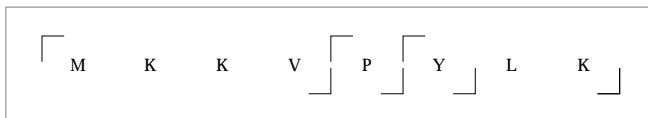

dbValid true YVKVQRPK PHOS(1) 2. 551. -1.70302 4.99098 100. ? 1230.

S\_Acido\_new%gi|68568515|gb|AAY81444.1| YVKVQRPK%:PHOS:.....%sample\_2%cmpd\_12

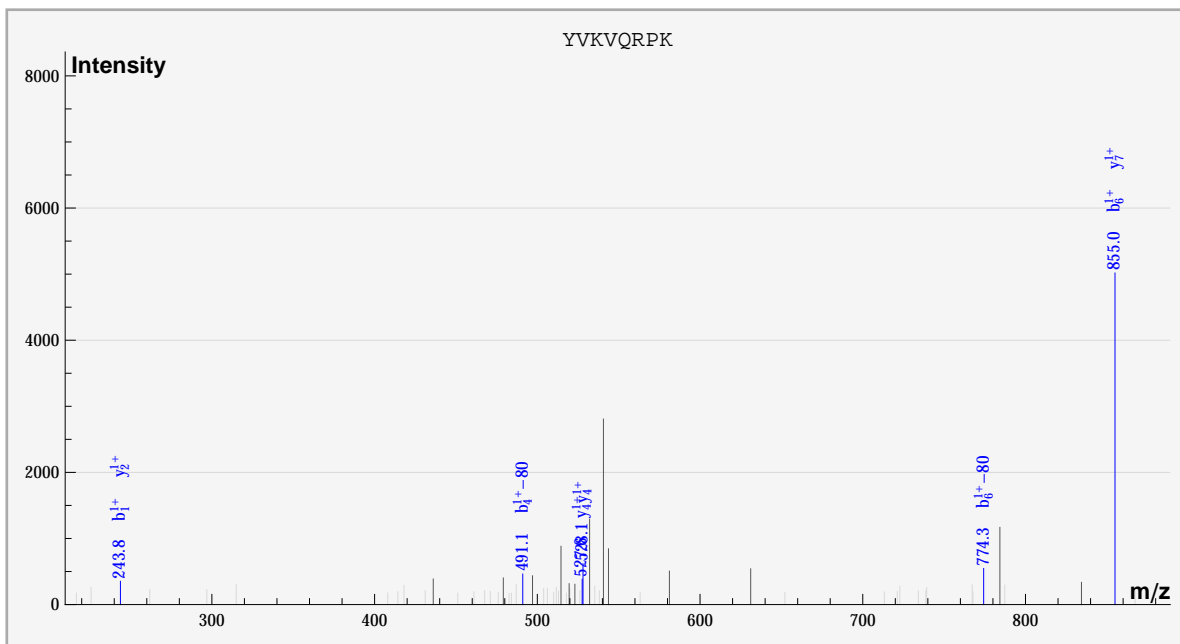

|   | # | b | b* | # | y | y* | P | P* |
|---|---|---|----|---|---|----|---|----|
| Y | 1 | ✓ |    |   |   |    |   |    |
| V | 2 |   |    | 7 | ✓ |    |   |    |
| K | 3 |   |    | 6 |   |    |   |    |
| V | 4 |   | ✓  | 5 |   |    |   |    |
| Q | 5 |   |    | 4 | ✓ |    |   |    |
| R | 6 | ✓ | ✓  | 3 |   |    |   |    |
| P | 7 |   |    | 2 | ✓ |    |   |    |
| K | 8 |   |    | 1 |   |    |   |    |

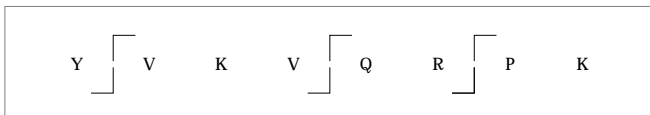

dbValid true KYSMVSTK PHOS(2) 2. 551. 1.21581 5.05099 100. ? 1764.  
 S\_Acido\_new%gi|68568081|gb|AA81010.1| KYSMVSTK%:::PHOS:PHOS::%sample\_3%compd\_482

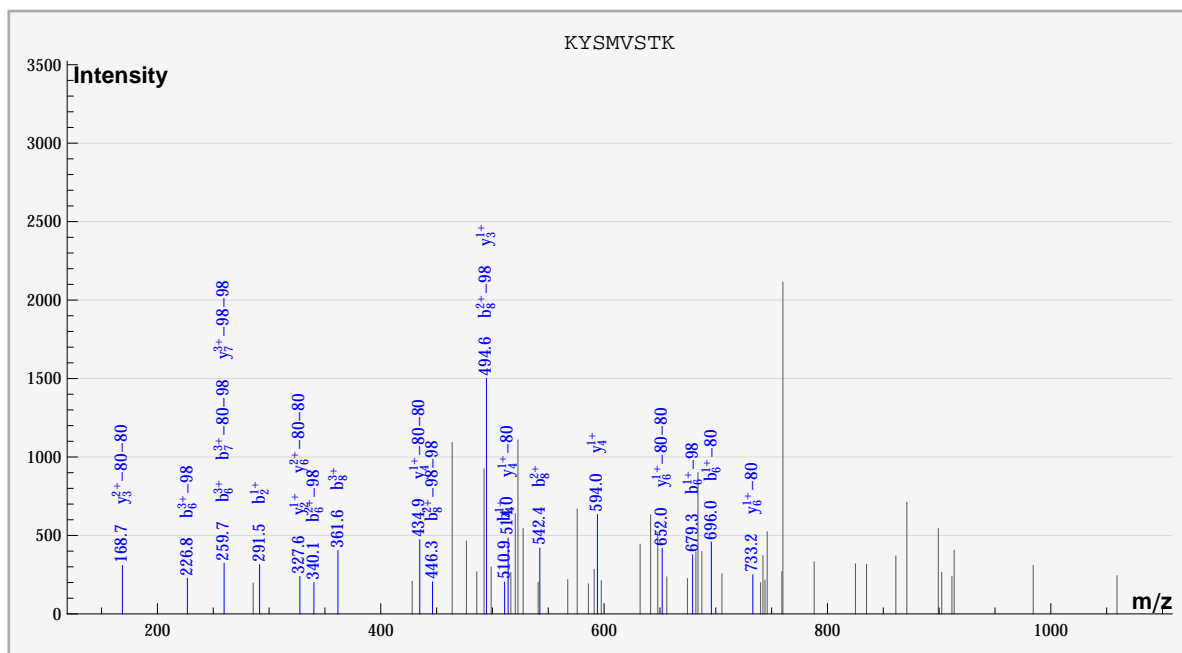

|   | # | b | b* | # | y | y* | P | P* |
|---|---|---|----|---|---|----|---|----|
| K | 1 |   |    |   |   |    |   |    |
| Y | 2 | ✓ |    | 7 |   | ✓  |   |    |
| S | 3 |   |    | 6 |   | ✓  |   |    |
| M | 4 | ✓ |    | 5 |   |    |   |    |
| V | 5 |   |    | 4 | ✓ | ✓  |   |    |
| S | 6 | ✓ | ✓  | 3 | ✓ | ✓  |   |    |
| T | 7 |   | ✓  | 2 | ✓ |    |   |    |
| K | 8 | ✓ | ✓  | 1 |   |    |   |    |

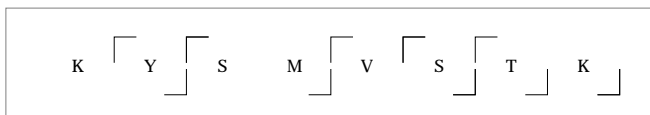

dbValid true YVKVQRPK PHOS(1) 2. 551. -1.70302 5.02715 100. ? 2040.  
 S\_Acido\_new%gi|68568515|gb|AAY81444.1| YVKVQRPK%:PHOS:.....%sample\_3%compd\_736

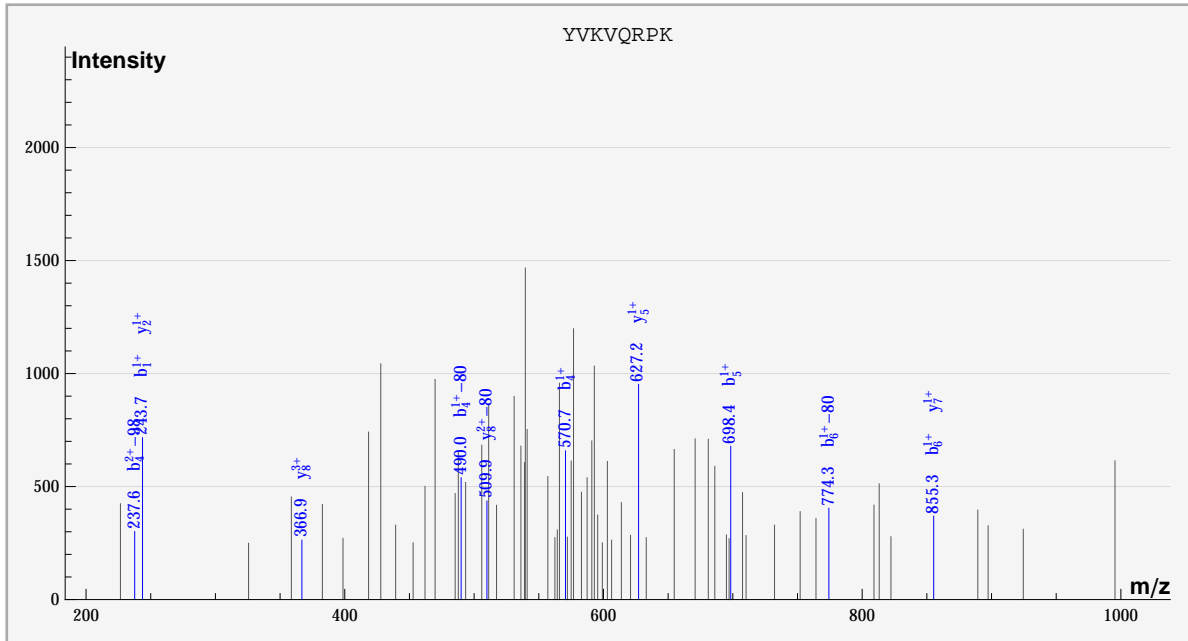

|   | # | b | b* | # | y | y* | P | P* |
|---|---|---|----|---|---|----|---|----|
| Y | 1 | ✓ |    |   |   |    | ✓ | ✓  |
| V | 2 |   |    | 7 | ✓ |    |   |    |
| K | 3 |   |    | 6 |   |    |   |    |
| V | 4 | ✓ | ✓  | 5 | ✓ |    |   |    |
| Q | 5 | ✓ |    | 4 |   |    |   |    |
| R | 6 | ✓ | ✓  | 3 |   |    |   |    |
| P | 7 |   |    | 2 | ✓ |    |   |    |
| K | 8 |   |    | 1 |   |    |   |    |

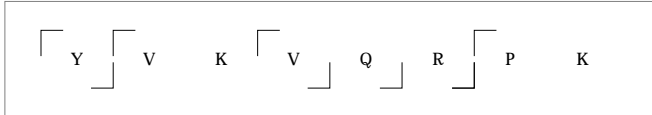

dbValid true WLQDSVNR PHOS(1) 2. 551. -1.7576 4.98628 100. ? 2472.  
 S\_Acido\_new%gi|68567080|gb|AAY80009.1| WLQDSVNR%::::PHOS::::%sample\_2%cmpd\_1121

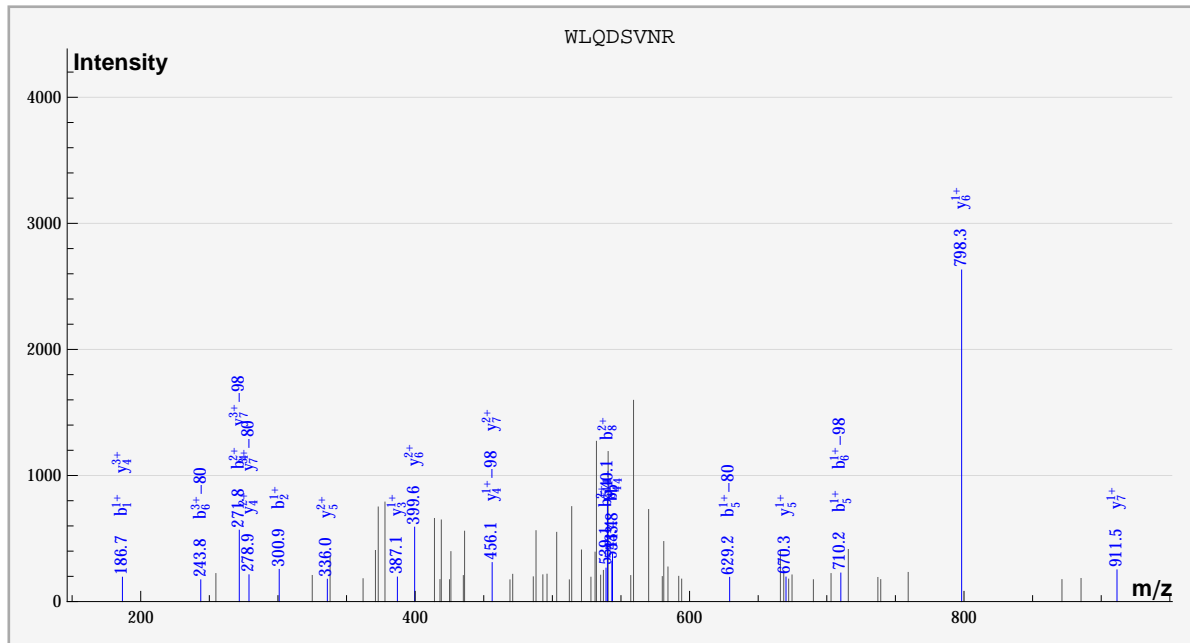

|   | # | b | b* | # | y | y* | P | P* |
|---|---|---|----|---|---|----|---|----|
| W | 1 | ✓ |    |   |   |    |   |    |
| L | 2 | ✓ |    | 7 | ✓ | ✓  |   |    |
| Q | 3 |   |    | 6 | ✓ |    |   |    |
| D | 4 | ✓ |    | 5 | ✓ |    |   |    |
| S | 5 | ✓ | ✓  | 4 | ✓ | ✓  |   |    |
| V | 6 |   | ✓  | 3 | ✓ |    |   |    |
| N | 7 |   |    | 2 |   |    |   |    |
| R | 8 | ✓ |    | 1 |   |    |   |    |

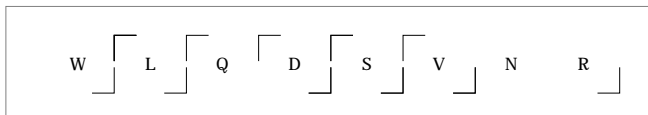



dbValid true KLYSGSKR PHOS(2) 2. 551. -1.25916 4.98346 100. ? 4776.  
 S\_Acido\_new%gi|68567861|gb|AAy80790.1| KLYSGSKR%::PHOS::PHOS::%sample\_3%compd\_3247

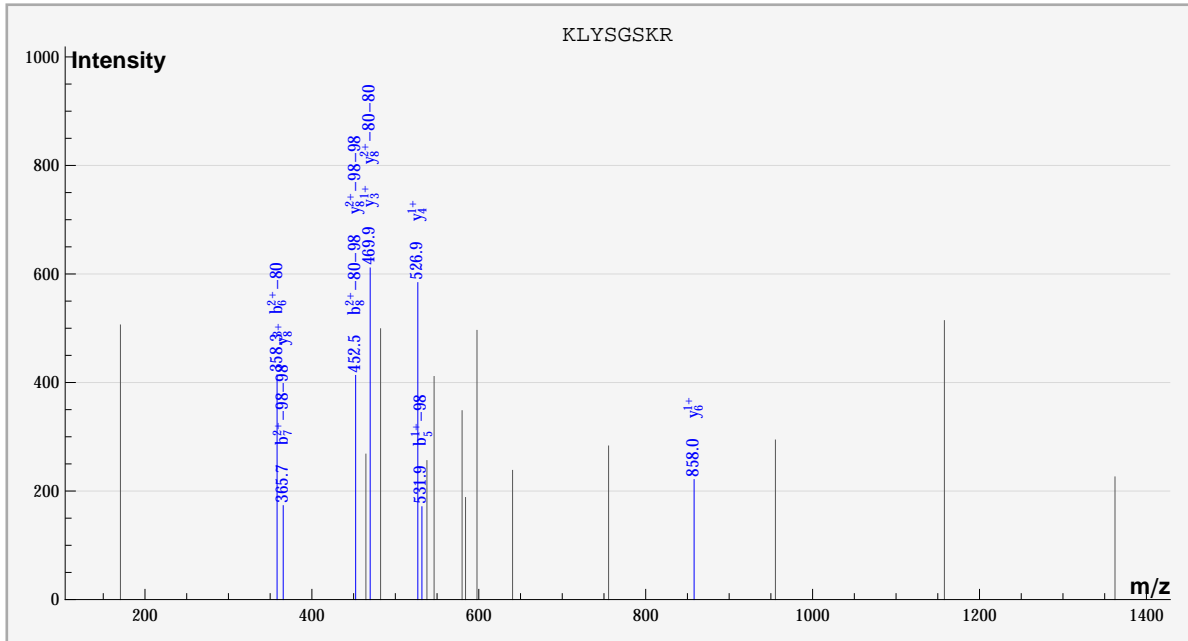

|   | # | b | b* | # | y | y* | P | P* |
|---|---|---|----|---|---|----|---|----|
| K | 1 |   |    |   |   |    | ✓ | ✓  |
| L | 2 |   |    | 7 |   |    |   |    |
| Y | 3 |   |    | 6 | ✓ |    |   |    |
| S | 4 |   |    | 5 |   |    |   |    |
| G | 5 | ✓ |    | 4 | ✓ |    |   |    |
| S | 6 | ✓ |    | 3 | ✓ |    |   |    |
| K | 7 | ✓ |    | 2 |   |    |   |    |
| R | 8 | ✓ |    | 1 |   |    |   |    |

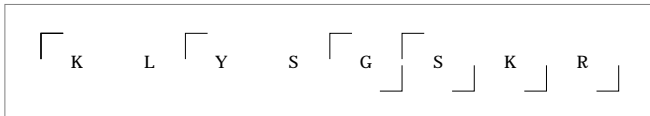

dbValid true YKLMTR PHOS(2) 2. 552. -1.75784 5.1945 100. ? 1824.  
 S\_Acido\_new%gi|68567373|gb|AAy80302.1| YKLMTR%:PHOS:::PHOS::%sample\_3%cmpd\_539

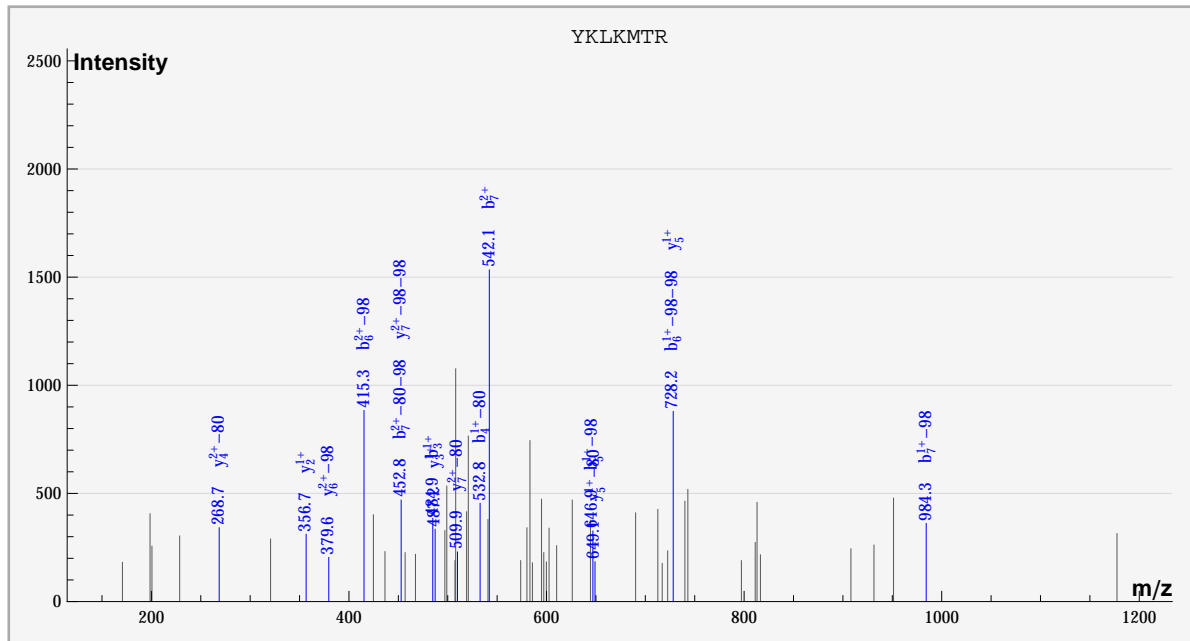

|   | # | b | b* | # | y | y* | P | P* |
|---|---|---|----|---|---|----|---|----|
| Y | 1 |   |    |   |   |    |   | ✓  |
| K | 2 |   |    | 6 |   | ✓  |   |    |
| L | 3 | ✓ |    | 5 | ✓ | ✓  |   |    |
| K | 4 |   | ✓  | 4 |   | ✓  |   |    |
| M | 5 |   | ✓  | 3 | ✓ |    |   |    |
| T | 6 |   | ✓  | 2 | ✓ |    |   |    |
| R | 7 | ✓ | ✓  | 1 |   |    |   |    |

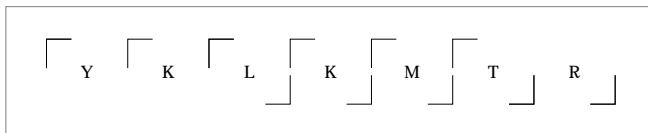

dbValid true SHQVAIDVR PHOS(1) 2. 552. 0.763497 4.99564 100. ? 2376.  
 S\_Acido\_new%gil68567764|gb|AAY80693.1| SHQVAIDVR%:PHOS:.....%sample\_3%cmpd\_1048

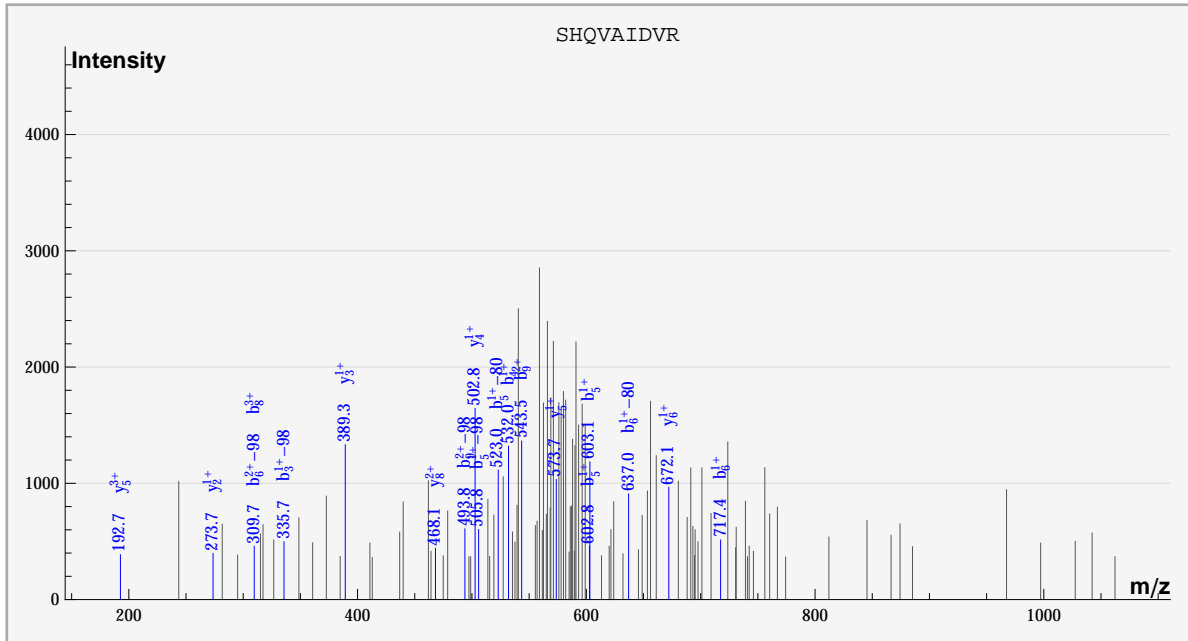

|   | # | b | b* | # | y | y* | P | P* |
|---|---|---|----|---|---|----|---|----|
| S | 1 |   |    |   |   |    |   |    |
| H | 2 |   |    | 8 | ✓ |    |   |    |
| Q | 3 | ✓ | ✓  | 7 |   |    |   |    |
| V | 4 | ✓ |    | 6 | ✓ |    |   |    |
| A | 5 | ✓ | ✓  | 5 | ✓ |    |   |    |
| I | 6 | ✓ | ✓  | 4 | ✓ |    |   |    |
| D | 7 |   |    | 3 | ✓ |    |   |    |
| V | 8 | ✓ |    | 2 | ✓ |    |   |    |
| R | 9 | ✓ | ✓  | 1 |   |    |   |    |

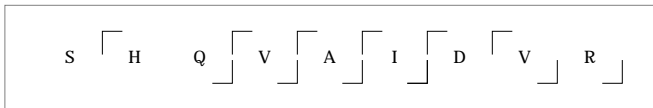

dbValid true RTLEALLSTPLTVR PHOS(1) 3. 552. -1.3623 4.94245 100. ? 2400.  
 S\_Acido\_new%gil68567378|gb|AAY80307.1| RTLEALLSTPLTVR%:::::::PHOS:::::::sample\_3%compd\_1070

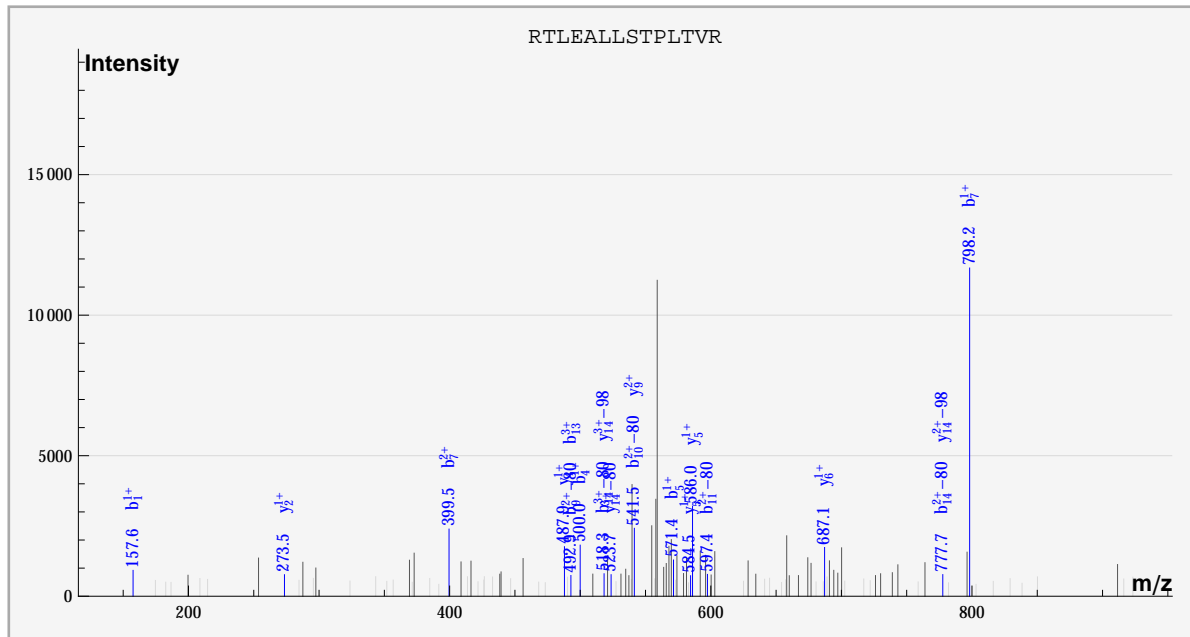

|   | #  | b | b* | #  | y | y* | P | P* |
|---|----|---|----|----|---|----|---|----|
| R | 1  | ✓ |    |    |   |    |   | ✓  |
| T | 2  |   |    | 13 |   |    |   |    |
| L | 3  |   |    | 12 |   |    |   |    |
| E | 4  | ✓ |    | 11 |   |    |   |    |
| A | 5  | ✓ |    | 10 |   |    |   |    |
| L | 6  |   |    | 9  | ✓ |    |   |    |
| L | 7  | ✓ |    | 8  |   |    |   |    |
| S | 8  |   |    | 7  |   |    |   |    |
| T | 9  |   | ✓  | 6  | ✓ |    |   |    |
| P | 10 |   | ✓  | 5  | ✓ |    |   |    |
| L | 11 |   | ✓  | 4  | ✓ |    |   |    |
| T | 12 |   |    | 3  |   |    |   |    |
| V | 13 | ✓ |    | 2  | ✓ |    |   |    |
| R | 14 |   | ✓  | 1  |   |    |   |    |

RTLEALLSTPLTVR

dbValid true ASLNIMSRDESIR PHOS(2) 3. 552. -0.764812 4.90041 100. ? 2586.

S\_Acido\_new%gi|68567762|gb|AAy80691.1| ASLNIMSRDESIR%::PHOS:::PHOS:::sample\_3%compd\_1237

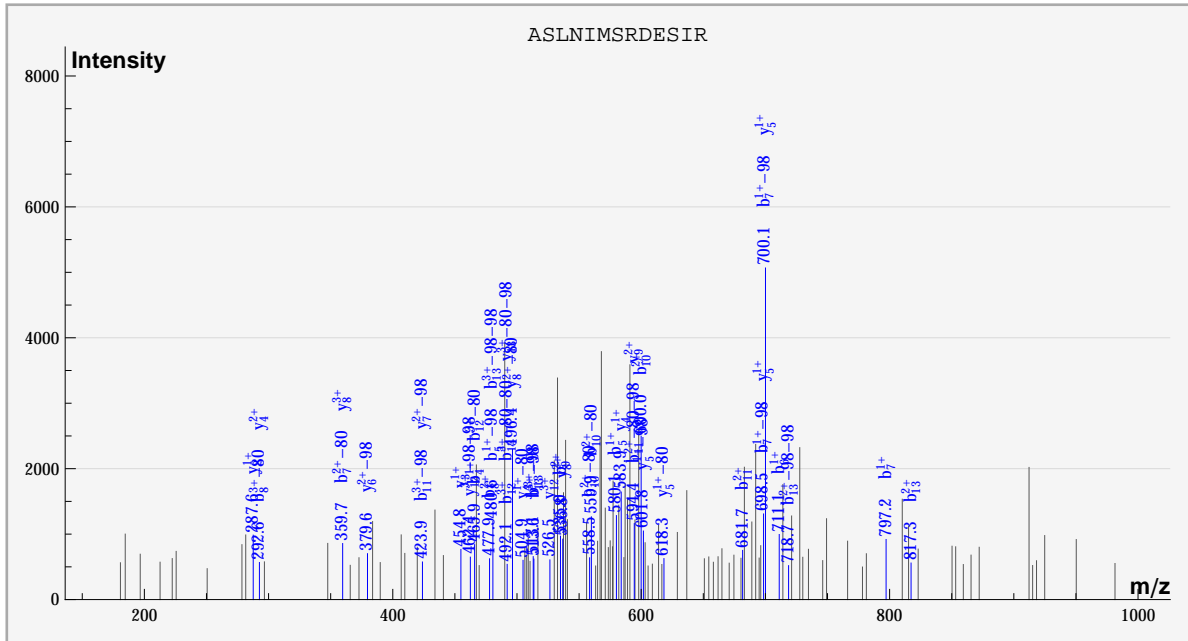

|   | #  | b | b* | #  | y | y* | P | P* |
|---|----|---|----|----|---|----|---|----|
| A | 1  |   |    |    |   |    |   | ✓  |
| S | 2  |   |    | 12 | ✓ | ✓  |   |    |
| L | 3  |   |    | 11 |   |    |   |    |
| N | 4  | ✓ |    | 10 |   |    |   |    |
| I | 5  | ✓ | ✓  | 9  | ✓ |    |   |    |
| M | 6  | ✓ |    | 8  | ✓ | ✓  |   |    |
| S | 7  | ✓ | ✓  | 7  |   | ✓  |   |    |
| R | 8  | ✓ | ✓  | 6  |   | ✓  |   |    |
| D | 9  | ✓ |    | 5  | ✓ | ✓  |   |    |
| E | 10 | ✓ | ✓  | 4  | ✓ | ✓  |   |    |
| S | 11 | ✓ | ✓  | 3  | ✓ |    |   |    |
| I | 12 | ✓ | ✓  | 2  | ✓ |    |   |    |
| R | 13 | ✓ | ✓  | 1  |   |    |   |    |

[ A [ S L N ] I ] M ] S ] R ] D ] E ] S ] I ] R ]

dbValid true IIGNTSPYR PHOS(1) 2. 552. -1.23957 4.90949 100. ? 2814.  
 S\_Acido\_new%gil68566756|gb|AA79685.1| IIGNTSPYR%:.....PHOS:%sample\_3%compd\_1447

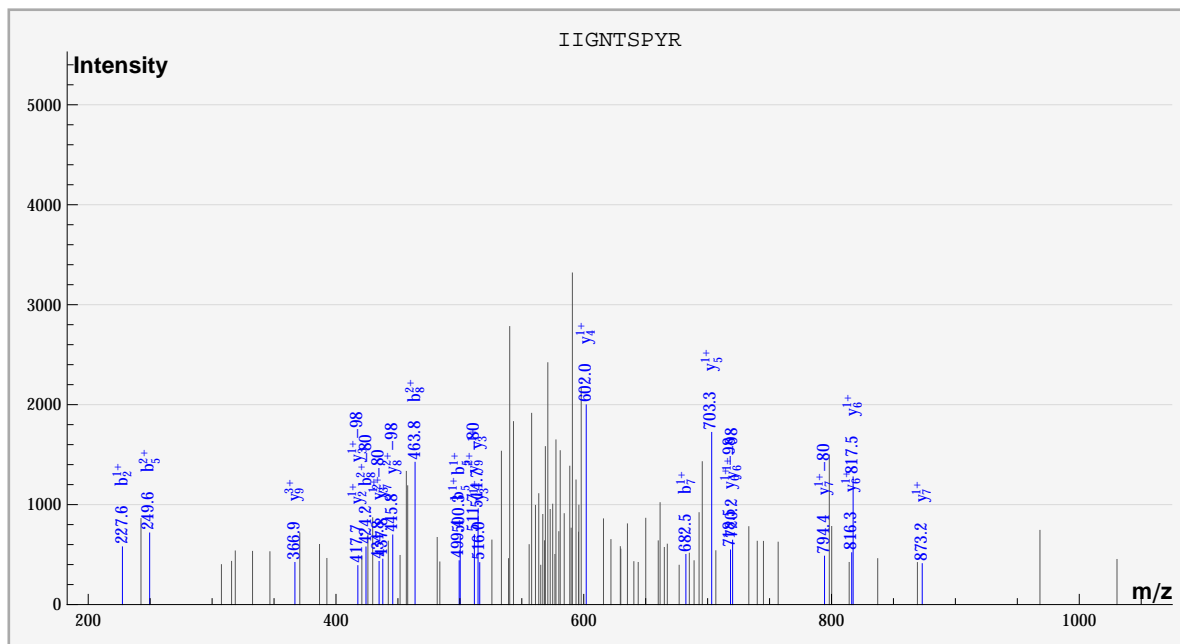

|   | # | b | b* | # | y | y* | P | P* |
|---|---|---|----|---|---|----|---|----|
| I | 1 |   |    |   |   |    | ✓ | ✓  |
| I | 2 | ✓ |    | 8 |   | ✓  |   |    |
| G | 3 |   |    | 7 | ✓ | ✓  |   |    |
| N | 4 |   |    | 6 | ✓ | ✓  |   |    |
| T | 5 | ✓ |    | 5 | ✓ |    |   |    |
| S | 6 |   |    | 4 | ✓ |    |   |    |
| P | 7 | ✓ |    | 3 | ✓ | ✓  |   |    |
| Y | 8 | ✓ | ✓  | 2 | ✓ |    |   |    |
| R | 9 |   |    | 1 |   |    |   |    |

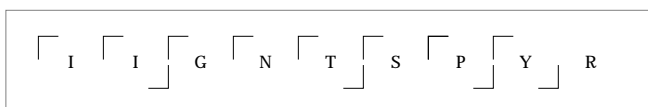

dbValid true IRGFVQSLTVASGR PHOS(2) 3. 552. -1.06969 5.03172 100. ? 2826.  
 S\_Acido\_new%gi|68568460|gb|AAy81389.1| IRGFVQSLTVASGR%:::PHOS::PHOS::%sample\_3%compd\_1458

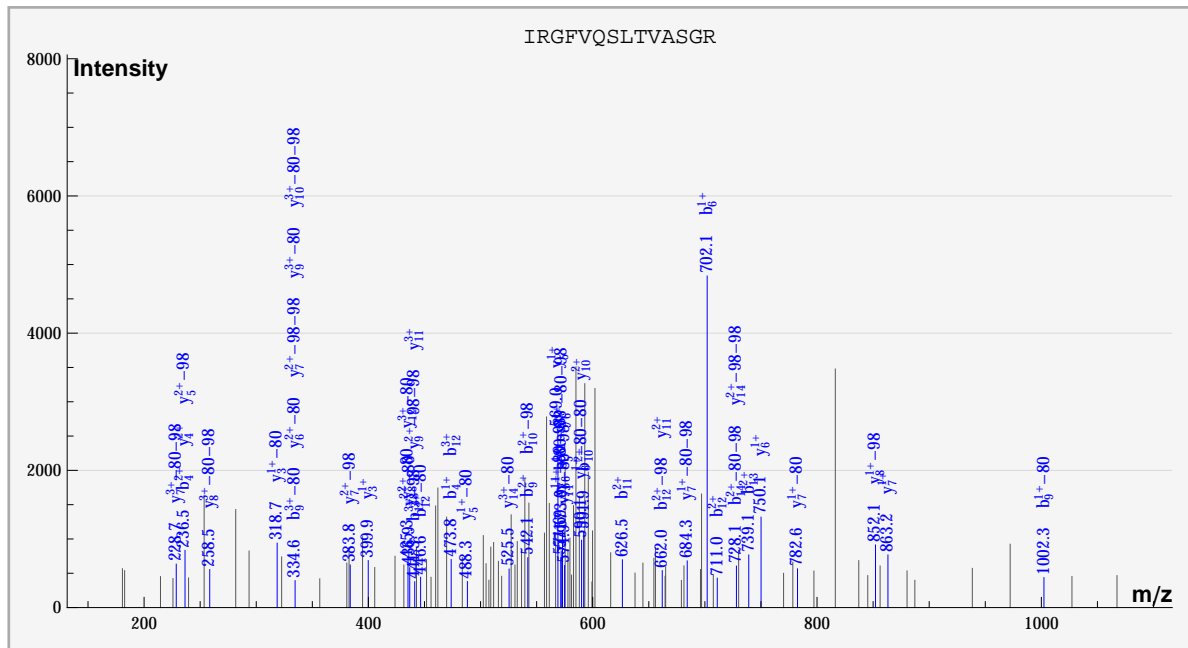

|   | #  | b | b* | #  | y | y* | P | P* |
|---|----|---|----|----|---|----|---|----|
| I | 1  |   |    |    |   |    |   | ✓  |
| R | 2  |   |    | 13 |   |    |   |    |
| G | 3  |   |    | 12 |   | ✓  |   |    |
| F | 4  | ✓ |    | 11 | ✓ | ✓  |   |    |
| V | 5  | ✓ |    | 10 | ✓ | ✓  |   |    |
| Q | 6  | ✓ |    | 9  |   | ✓  |   |    |
| S | 7  |   |    | 8  |   | ✓  |   |    |
| L | 8  |   |    | 7  | ✓ | ✓  |   |    |
| T | 9  | ✓ | ✓  | 6  | ✓ | ✓  |   |    |
| V | 10 | ✓ | ✓  | 5  | ✓ | ✓  |   |    |
| A | 11 | ✓ |    | 4  | ✓ |    |   |    |
| S | 12 | ✓ | ✓  | 3  | ✓ | ✓  |   |    |
| G | 13 | ✓ |    | 2  |   |    |   |    |
| R | 14 |   | ✓  | 1  |   |    |   |    |

I R G F V Q S L T V A S G R

dbValid true RLQTIIVYK PHOS(1) 2. 552. -1.20319 4.93876 100. ? 3042.  
 S\_Acido\_new%gi|68566579|gb|AAY79508.1| RLQTIIVYK%:::PHOS:::%sample\_3%compd\_1657

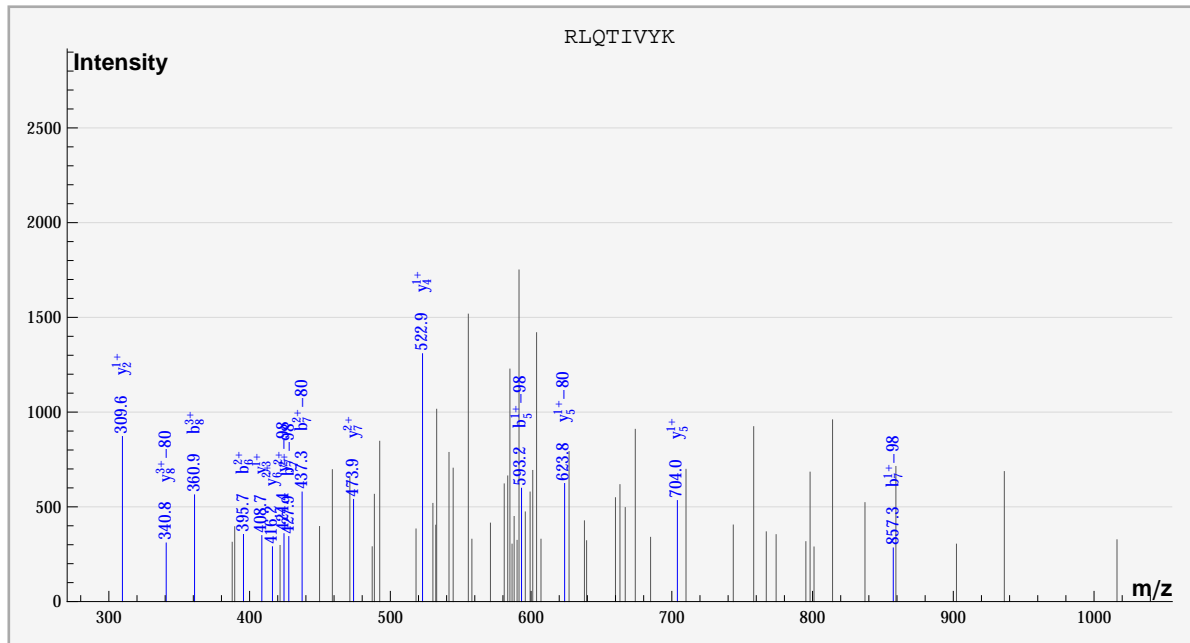

|   | # | b | b* | # | y | y* | P | P* |
|---|---|---|----|---|---|----|---|----|
| R | 1 |   |    |   |   |    |   | ✓  |
| L | 2 |   |    | 7 | ✓ | ✓  |   |    |
| Q | 3 |   |    | 6 | ✓ |    |   |    |
| T | 4 |   |    | 5 | ✓ | ✓  |   |    |
| I | 5 | ✓ |    | 4 | ✓ |    |   |    |
| V | 6 | ✓ |    | 3 | ✓ |    |   |    |
| Y | 7 |   | ✓  | 2 | ✓ |    |   |    |
| K | 8 | ✓ |    | 1 |   |    |   |    |

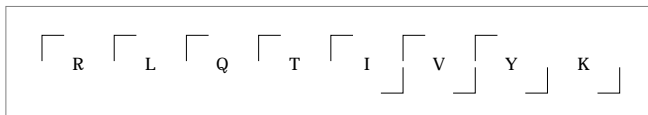



dbValid true EITFSFSKK PHOS(2) 2. 552. -1.77277 5.04919 100. ? 4044.

S\_Acido\_new%gi|68567014|gb|AA79943.1| EITFSFSKK%:::PHOS:::PHOS:::sample\_3%compd\_2575

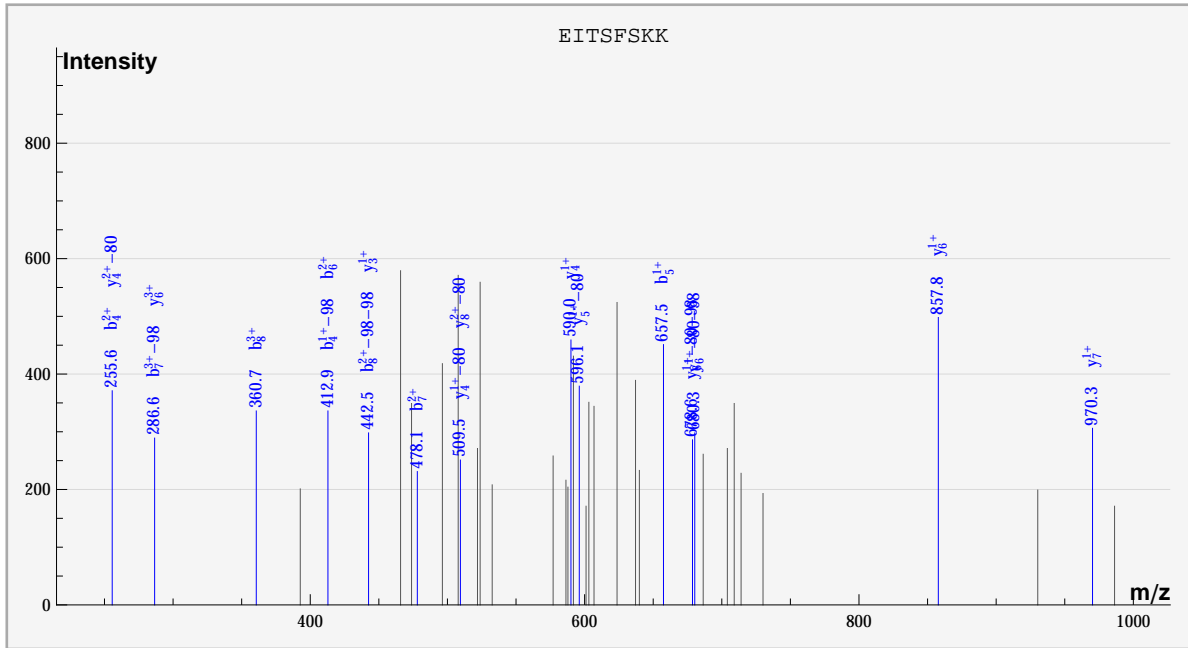

|   | # | b | b* | # | y | y* | P | P* |
|---|---|---|----|---|---|----|---|----|
| E | 1 |   |    |   |   |    |   | ✓  |
| I | 2 |   |    | 7 | ✓ |    |   |    |
| T | 3 |   |    | 6 | ✓ | ✓  |   |    |
| S | 4 | ✓ | ✓  | 5 |   | ✓  |   |    |
| F | 5 | ✓ |    | 4 | ✓ | ✓  |   |    |
| S | 6 | ✓ |    | 3 | ✓ |    |   |    |
| K | 7 | ✓ | ✓  | 2 |   |    |   |    |
| K | 8 | ✓ | ✓  | 1 |   |    |   |    |

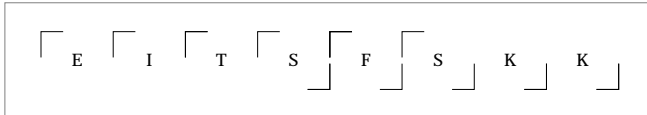

dbValid true YKNENPEK PHOS(1) 2. 553. -1.76576 5.05048 100. ? 1134.  
 S\_Acido\_new%gi|68568019|gb|AAY80948.1| YKNENPEK%:PHOS:.....:sample\_2%cmpd\_3708

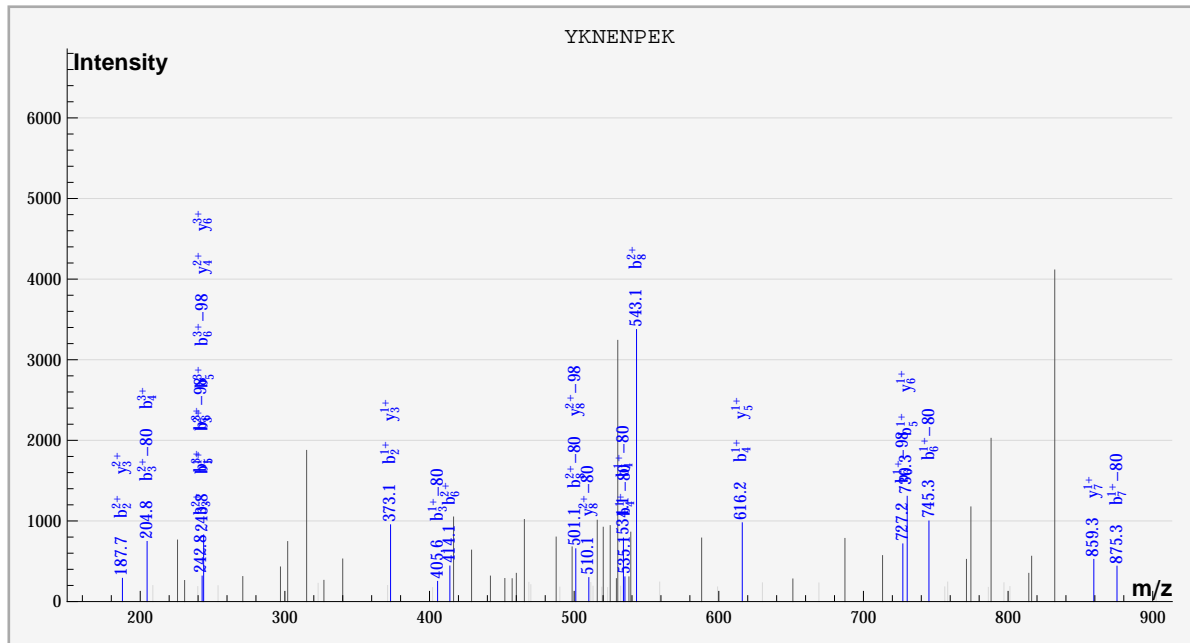

|   | # | b | b* | # | y | y* | P | P* |
|---|---|---|----|---|---|----|---|----|
| Y | 1 | ✓ |    |   |   |    |   | ✓  |
| K | 2 | ✓ |    | 7 | ✓ |    |   |    |
| N | 3 | ✓ | ✓  | 6 | ✓ |    |   |    |
| E | 4 | ✓ | ✓  | 5 | ✓ |    |   |    |
| N | 5 | ✓ |    | 4 | ✓ |    |   |    |
| P | 6 | ✓ | ✓  | 3 | ✓ |    |   |    |
| E | 7 |   | ✓  | 2 |   |    |   |    |
| K | 8 | ✓ | ✓  | 1 |   |    |   |    |

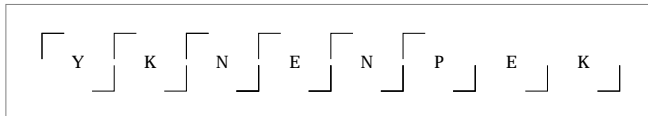

dbValid true YKNENPEK PHOS(1) 2. 553. -1.76576 5.16349 100. ? 1146.

S\_Acido\_new%gi|68568019|gb|AAY80948.1| YKNENPEK%:PHOS:.....%sample\_2%cmpd\_3718

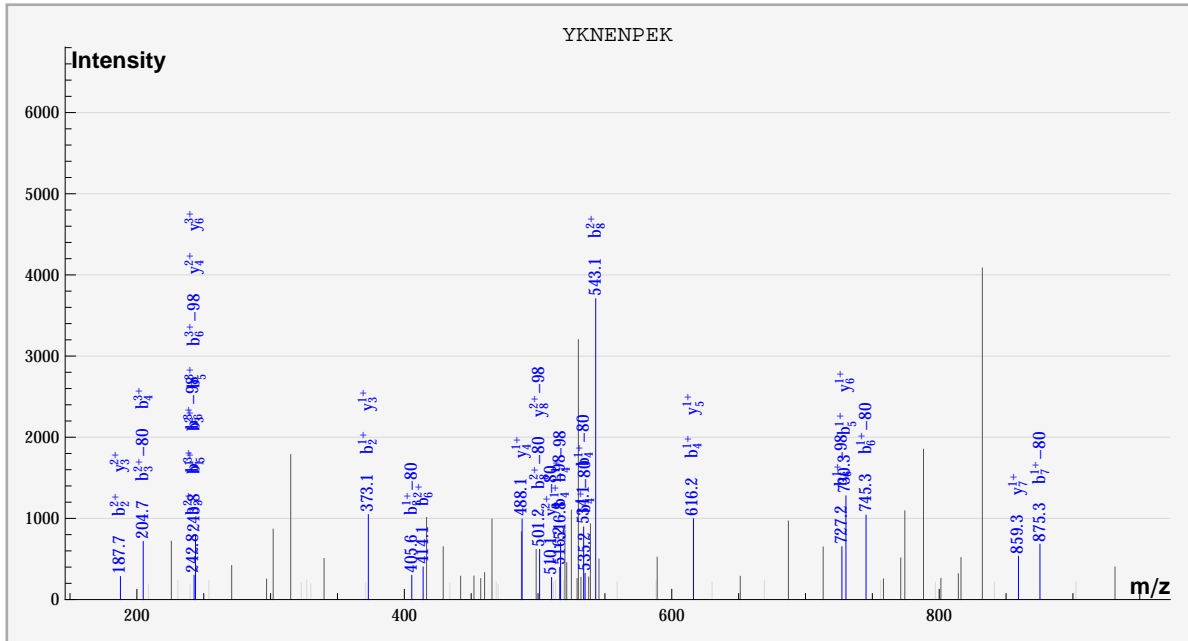

|   | # | b | b* | # | y | y* | P | P* |
|---|---|---|----|---|---|----|---|----|
| Y | 1 | ✓ |    |   |   |    |   | ✓  |
| K | 2 | ✓ |    | 7 | ✓ |    |   |    |
| N | 3 | ✓ | ✓  | 6 | ✓ |    |   |    |
| E | 4 | ✓ | ✓  | 5 | ✓ |    |   |    |
| N | 5 | ✓ |    | 4 | ✓ |    |   |    |
| P | 6 | ✓ | ✓  | 3 | ✓ |    |   |    |
| E | 7 |   | ✓  | 2 |   |    |   |    |
| K | 8 | ✓ | ✓  | 1 |   |    |   |    |

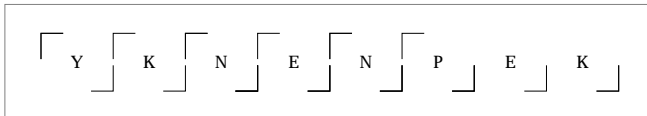

dbValid true YKNENPEK PHOS(1) 2. 553. -1.76576 5.15885 100. ? 1170.  
 S\_Acido\_new%gi|68568019|gb|AAY80948.1| YKNENPEK%:PHOS:.....:sample\_2%cmpd\_3738

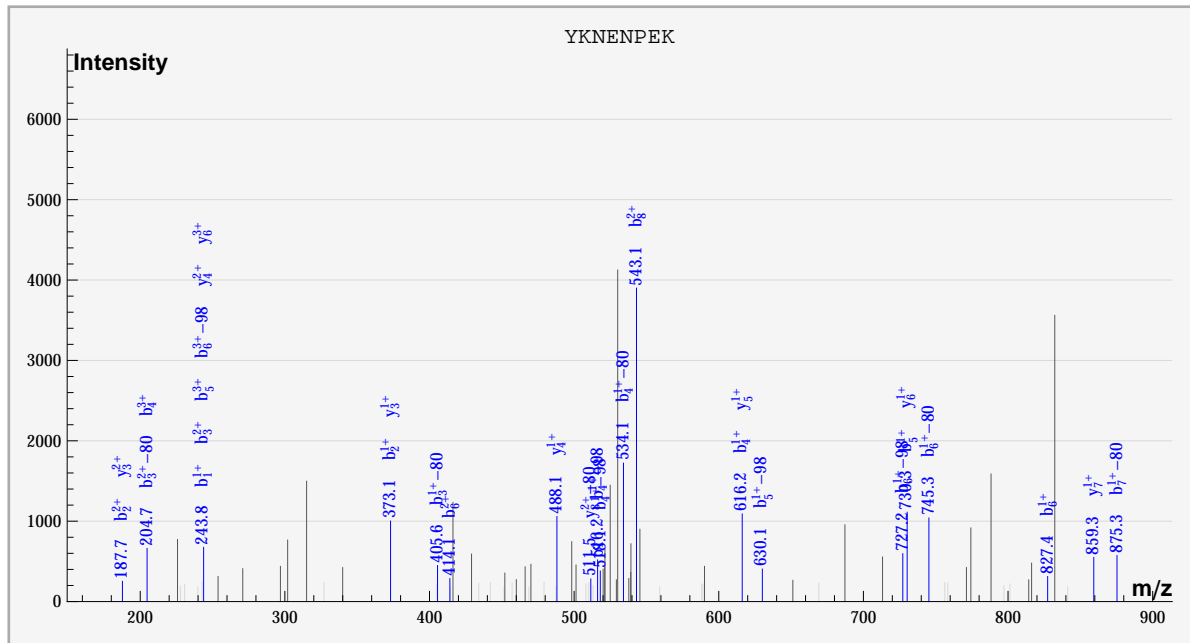

|   | # | b | b* | # | y | y* | P | P* |
|---|---|---|----|---|---|----|---|----|
| Y | 1 | ✓ |    |   |   |    |   | ✓  |
| K | 2 | ✓ |    | 7 | ✓ |    |   |    |
| N | 3 | ✓ | ✓  | 6 | ✓ |    |   |    |
| E | 4 | ✓ | ✓  | 5 | ✓ |    |   |    |
| N | 5 | ✓ | ✓  | 4 | ✓ |    |   |    |
| P | 6 | ✓ | ✓  | 3 | ✓ |    |   |    |
| E | 7 |   | ✓  | 2 |   |    |   |    |
| K | 8 | ✓ |    | 1 |   |    |   |    |

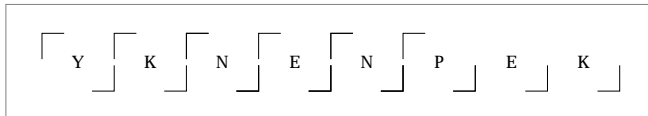

dbValid true STTDSVKK PHOS(3) 2. 553. 0.184362 5.3898 100. ? 1668.

S\_Acido\_new%gi|68567326|gb|AAy80255.1| STTDSVKK%::PHOS:PHOS::PHOS:::%sample\_0%compd\_385

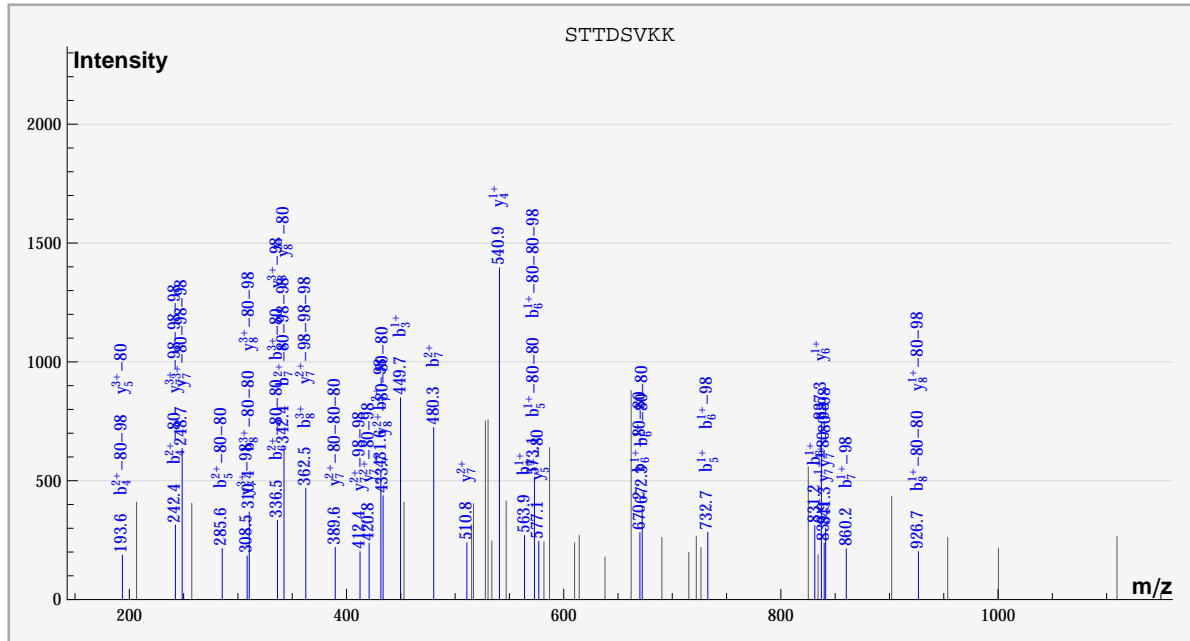

|   | # | b | b* | # | y | y* | P | P* |
|---|---|---|----|---|---|----|---|----|
| S | 1 |   |    |   |   |    |   | ✓  |
| T | 2 |   |    | 7 | ✓ | ✓  |   |    |
| T | 3 | ✓ |    | 6 | ✓ |    |   |    |
| D | 4 | ✓ | ✓  | 5 |   | ✓  |   |    |
| S | 5 | ✓ | ✓  | 4 | ✓ |    |   |    |
| V | 6 | ✓ | ✓  | 3 |   |    |   |    |
| K | 7 | ✓ | ✓  | 2 |   |    |   |    |
| K | 8 | ✓ | ✓  | 1 |   |    |   |    |

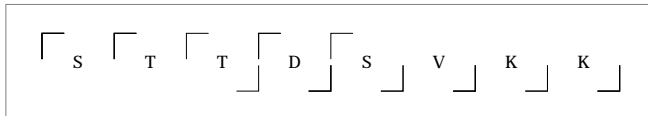

dbValid true RLSLTALVR PHOS(1) 2. 553. 1.81553 5.61912 100. ? 1980.  
 S\_Acido\_new%gi|68567144|gb|AAY80073.1| RLSLTALVR%:::PHOS:::sample\_2%compd\_684

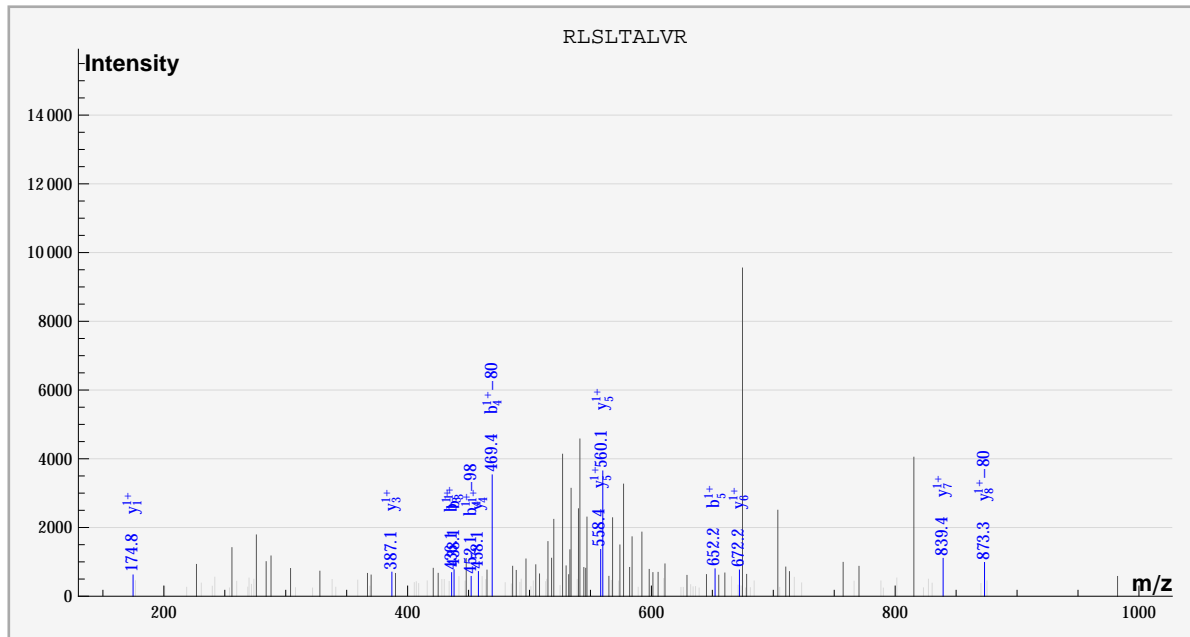

|   | # | b | b* | # | y | y* | P | P* |
|---|---|---|----|---|---|----|---|----|
| R | 1 |   |    |   |   |    |   |    |
| L | 2 |   |    | 8 |   | ✓  |   |    |
| S | 3 | ✓ |    | 7 | ✓ |    |   |    |
| L | 4 |   | ✓  | 6 | ✓ |    |   |    |
| T | 5 | ✓ |    | 5 | ✓ |    |   |    |
| A | 6 |   |    | 4 | ✓ |    |   |    |
| L | 7 |   |    | 3 | ✓ |    |   |    |
| V | 8 |   |    | 2 |   |    |   |    |
| R | 9 |   |    | 1 | ✓ |    |   |    |

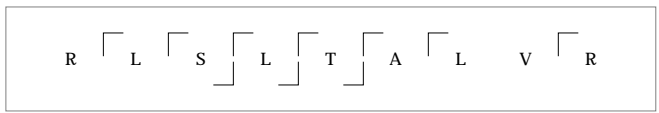

dbValid true RIKTSPNK PHOS(2) 2. 554. -1.74589 5.04903 100. ? 1458.  
 S\_Acido\_new%gi|68567110|gb|AAY80039.1| RIKTSPNK%:::PHOS:PHOS:::%sample\_2%cmpd\_204

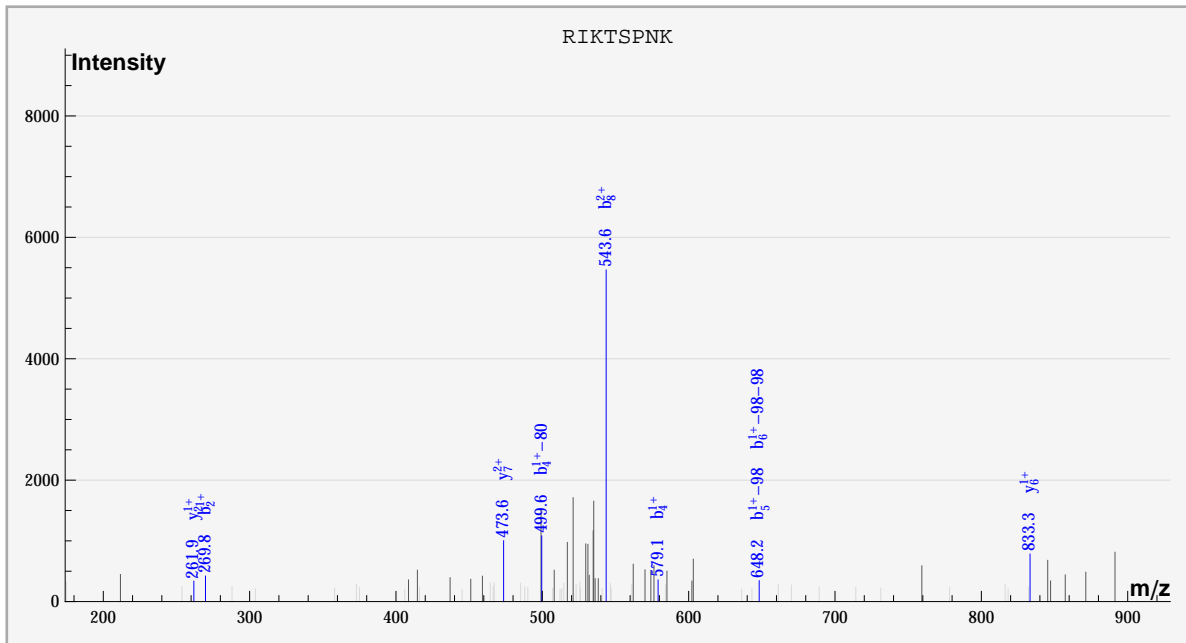

|   | # | b | b* | # | y | y* | P | P* |
|---|---|---|----|---|---|----|---|----|
| R | 1 |   |    |   |   |    |   |    |
| I | 2 | ✓ |    | 7 | ✓ |    |   |    |
| K | 3 |   |    | 6 | ✓ |    |   |    |
| T | 4 | ✓ | ✓  | 5 |   |    |   |    |
| S | 5 |   | ✓  | 4 |   |    |   |    |
| P | 6 |   | ✓  | 3 |   |    |   |    |
| N | 7 |   |    | 2 | ✓ |    |   |    |
| K | 8 | ✓ |    | 1 |   |    |   |    |

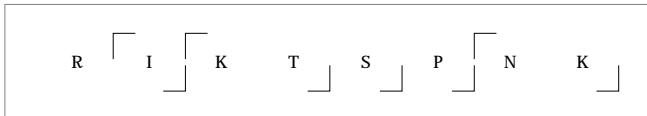

dbValid true IDTTSAKGR PHOS(2) 2. 554. 0.725382 5.06095 100. ? 1464.  
 S\_Acido\_new%gii68566862|gb|AA79791.1| IDTTSAKGR%:::PHOS:PHOS:.....%sample\_3%cmpd\_213

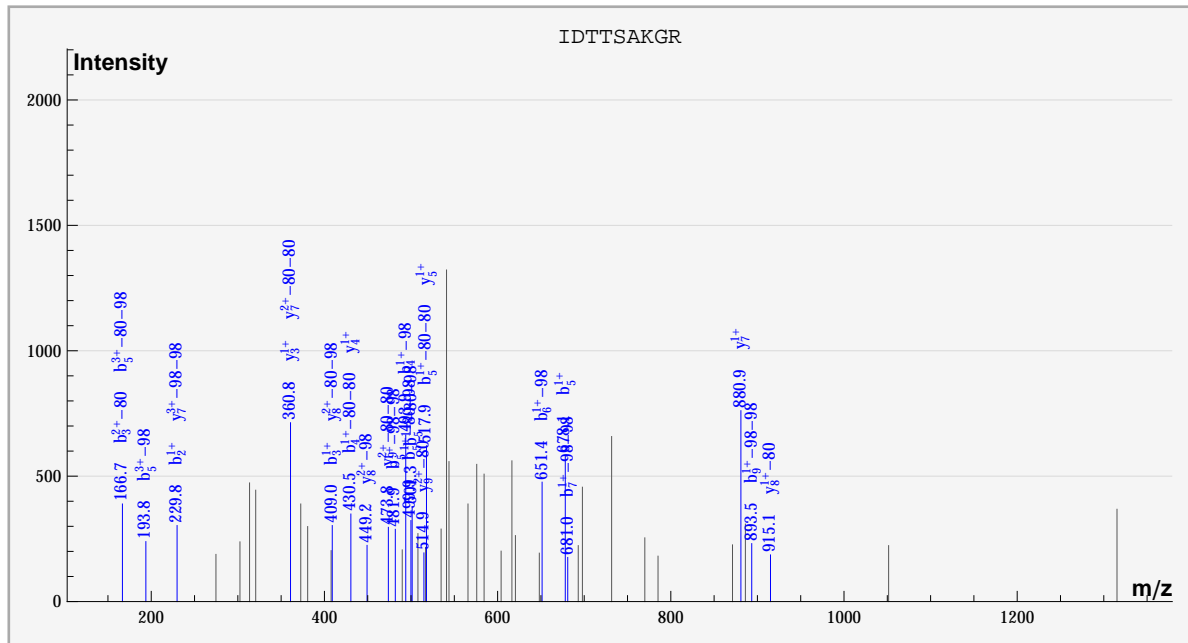

|   | # | b | b* | # | y | y* | P | P* |
|---|---|---|----|---|---|----|---|----|
| I | 1 |   |    |   |   |    |   | ✓  |
| D | 2 | ✓ |    | 8 |   | ✓  |   |    |
| T | 3 | ✓ | ✓  | 7 | ✓ | ✓  |   |    |
| T | 4 |   | ✓  | 6 |   |    |   |    |
| S | 5 | ✓ | ✓  | 5 | ✓ |    |   |    |
| A | 6 |   | ✓  | 4 | ✓ |    |   |    |
| K | 7 |   | ✓  | 3 | ✓ |    |   |    |
| G | 8 |   |    | 2 |   |    |   |    |
| R | 9 |   | ✓  | 1 |   |    |   |    |

I D T T S A K G R



dbValid true YDDTIKSALASLKR PHOS(1) 3. 554. 0.281698 5.03453 100. ? 1530.  
 S\_Acido\_new%gi|68566629|gb|AAY79558.1| YDDTIKSALASLKR%:PHOS:.....:sample\_2%compd\_269

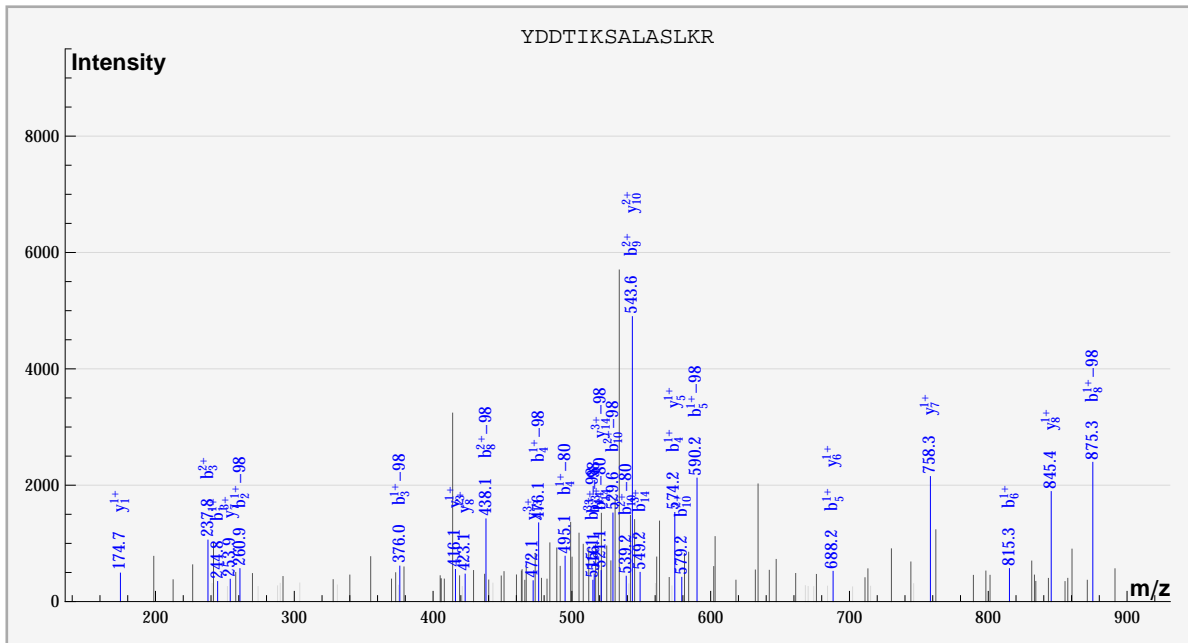

|   | #  | b | b* | #  | y | y* | P | P* |
|---|----|---|----|----|---|----|---|----|
| Y | 1  | ✓ |    |    |   |    |   | ✓  |
| D | 2  |   | ✓  | 13 | ✓ |    |   |    |
| D | 3  | ✓ | ✓  | 12 |   |    |   |    |
| T | 4  | ✓ | ✓  | 11 |   |    |   |    |
| I | 5  | ✓ | ✓  | 10 | ✓ |    |   |    |
| K | 6  | ✓ |    | 9  |   |    |   |    |
| S | 7  |   |    | 8  | ✓ |    |   |    |
| A | 8  |   | ✓  | 7  | ✓ |    |   |    |
| L | 9  | ✓ |    | 6  | ✓ |    |   |    |
| A | 10 | ✓ | ✓  | 5  | ✓ |    |   |    |
| S | 11 |   |    | 4  |   |    |   |    |
| L | 12 |   |    | 3  | ✓ |    |   |    |
| K | 13 |   |    | 2  |   |    |   |    |
| R | 14 | ✓ | ✓  | 1  | ✓ |    |   |    |

「Y」 「D」 「D」 「T」 「I」 「K」 「S」 「A」 「L」 「A」 「S」 「L」 「K」 「R」

dbValid true RGVLPITIR PHOS(1) 2. 554. -1.18193 5.2359 100. ? 1836.  
 S\_Acido\_new%gi|68567775|gb|AAY80704.1| RGVLPITIR%::::::PHOS:::sample\_0%cmpd\_535

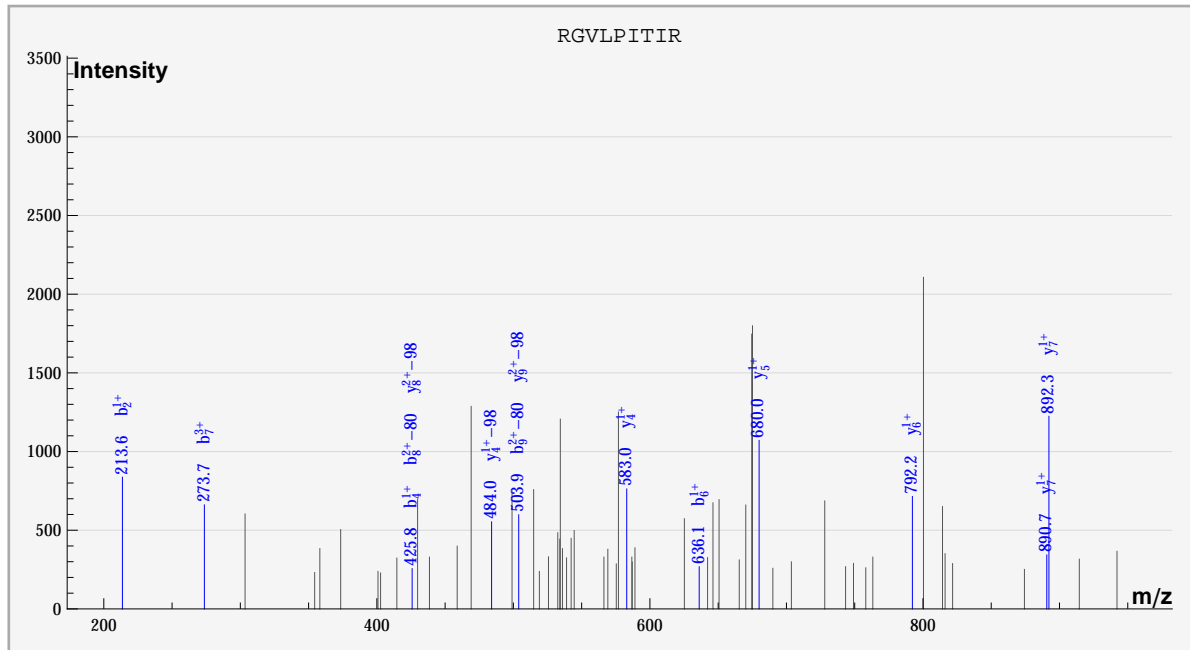

|   | # | b | b* | # | y | y* | P | P* |
|---|---|---|----|---|---|----|---|----|
| R | 1 |   |    |   |   |    |   | ✓  |
| G | 2 | ✓ |    | 8 |   | ✓  |   |    |
| V | 3 |   |    | 7 | ✓ |    |   |    |
| L | 4 | ✓ |    | 6 | ✓ |    |   |    |
| P | 5 |   |    | 5 | ✓ |    |   |    |
| I | 6 | ✓ |    | 4 | ✓ | ✓  |   |    |
| T | 7 | ✓ |    | 3 |   |    |   |    |
| I | 8 |   | ✓  | 2 |   |    |   |    |
| R | 9 |   | ✓  | 1 |   |    |   |    |

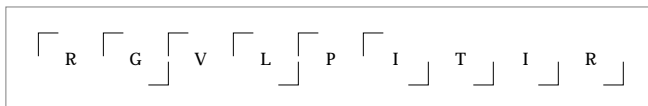

dbValid true GRHSATTSK PHOS(2) 2. 554. -1.28465 5.56003 100. ? 2016.  
 S\_Acido\_new%gi|68567947|gb|AAy80876.1| GRHSATTSK%:::::PHOS:PHOS::%sample\_0%compd\_693

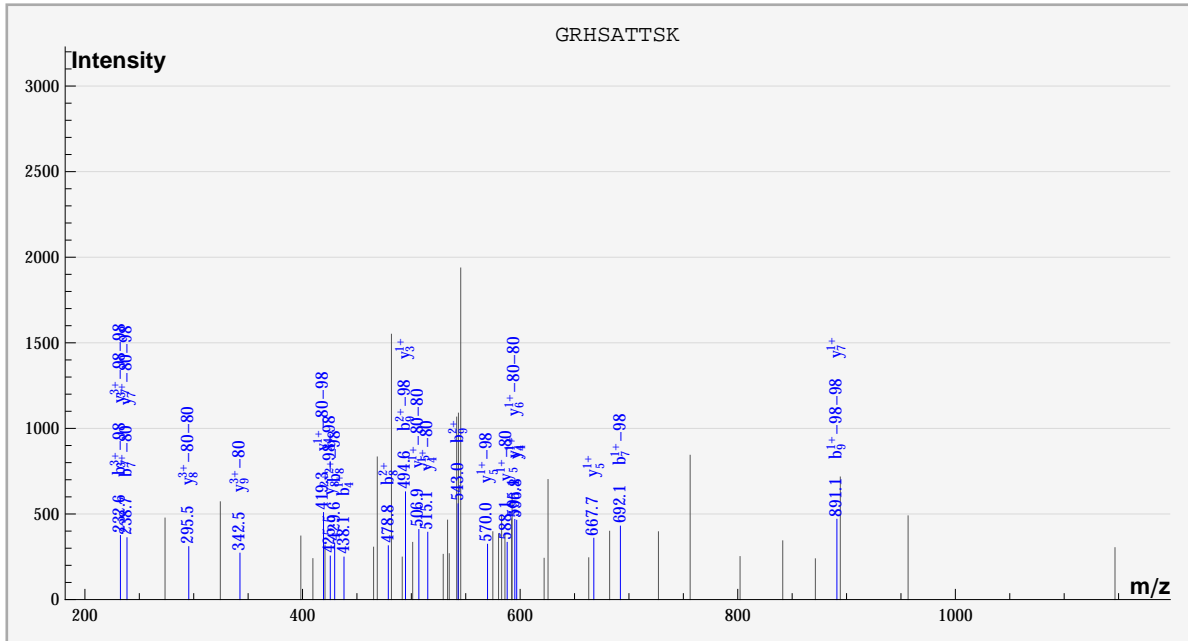

|   | # | b | b* | # | y | y* | P | P* |
|---|---|---|----|---|---|----|---|----|
| G | 1 |   |    |   |   |    |   | ✓  |
| R | 2 |   |    | 8 |   | ✓  |   |    |
| H | 3 |   |    | 7 | ✓ | ✓  |   |    |
| S | 4 | ✓ |    | 6 |   | ✓  |   |    |
| A | 5 |   |    | 5 | ✓ | ✓  |   |    |
| T | 6 |   |    | 4 | ✓ | ✓  |   |    |
| T | 7 |   | ✓  | 3 |   | ✓  |   |    |
| S | 8 | ✓ | ✓  | 2 |   |    |   |    |
| K | 9 | ✓ | ✓  | 1 |   |    |   |    |

┌ G ┌ R ┌ H ┌ S ┌ A ┌ T ┌ T ┌ S ┌ K ┌

dbValid true YVTATSTK PHOS(3) 2. 554. 1.68146 5.114 100. ? 2196.  
 S\_Acido\_new%gi|68568190|gb|AAy81119.1| YVTATSTK%:PHOS::PHOS::PHOS::%sample\_3%cmpd\_884

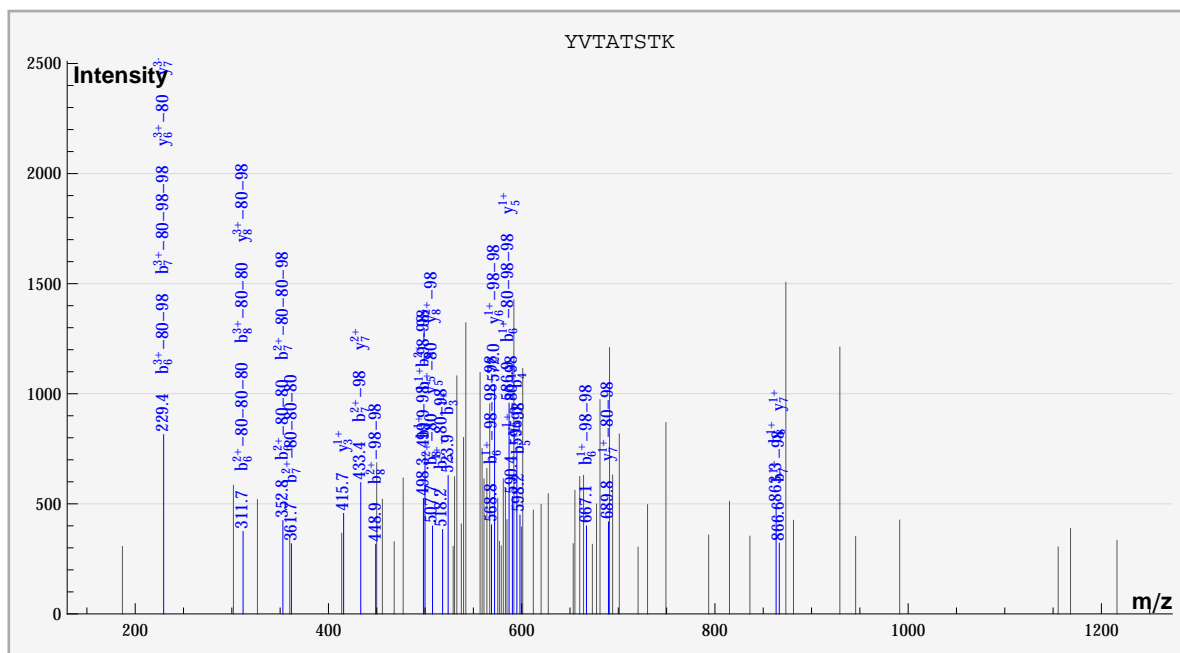

|   | # | b | b* | # | y | y* | P | P* |
|---|---|---|----|---|---|----|---|----|
| Y | 1 |   |    |   |   |    |   | ✓  |
| V | 2 |   |    | 7 | ✓ | ✓  |   |    |
| T | 3 | ✓ |    | 6 |   | ✓  |   |    |
| A | 4 | ✓ | ✓  | 5 | ✓ | ✓  |   |    |
| T | 5 |   | ✓  | 4 |   |    |   |    |
| S | 6 | ✓ | ✓  | 3 |   | ✓  |   |    |
| T | 7 |   | ✓  | 2 |   |    |   |    |
| K | 8 |   | ✓  | 1 |   |    |   |    |

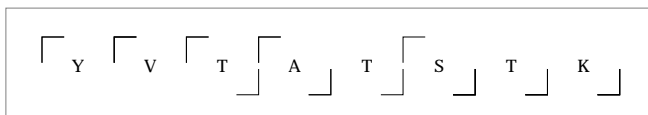

dbValid true KMIMDISR Oxidation\_M(2),PHOS(1) 2. 554.79 -1.54731 5.0795 100. ? 1476.  
 S\_Acido\_new%gil68566951|gb|AAy79880.1| KMIMDISR%::Oxidation\_M::Oxidation\_M::PHOS::%sample\_1%compd\_216

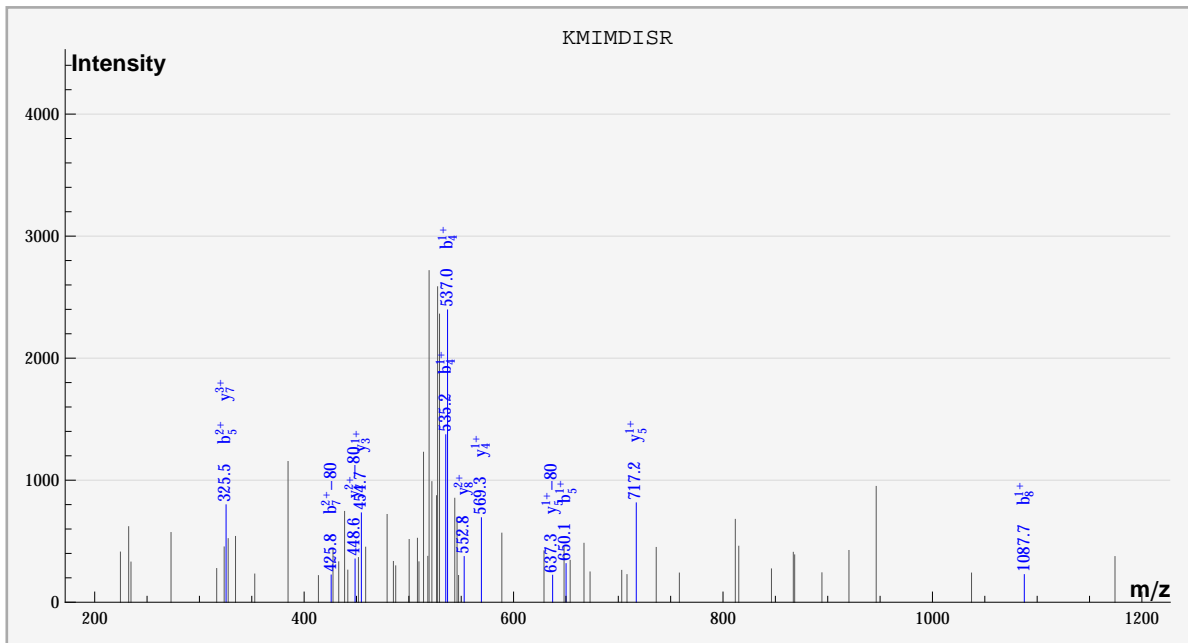

|   | # | b | b* | # | y | y* | P | P* |
|---|---|---|----|---|---|----|---|----|
| K | 1 |   |    |   |   |    |   | ✓  |
| M | 2 |   |    | 7 | ✓ | ✓  |   |    |
| I | 3 |   |    | 6 |   |    |   |    |
| M | 4 | ✓ |    | 5 | ✓ | ✓  |   |    |
| D | 5 | ✓ |    | 4 | ✓ |    |   |    |
| I | 6 |   |    | 3 | ✓ |    |   |    |
| S | 7 |   | ✓  | 2 |   |    |   |    |
| R | 8 | ✓ |    | 1 |   |    |   |    |

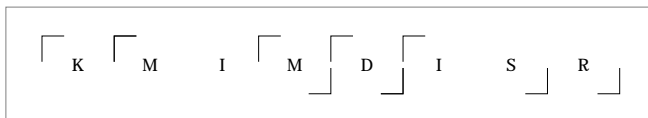

dbValid true RYISMGRK Oxidation\_M(1),PHOS(1) 2. 555. -1.23756 5.12272 100. ? 1680.  
 S\_Acido\_new%gil68567715|gb|AAY80644.1| RYISMGRK%::PHOS::Oxidation\_M:::sample\_0%cmpd\_398

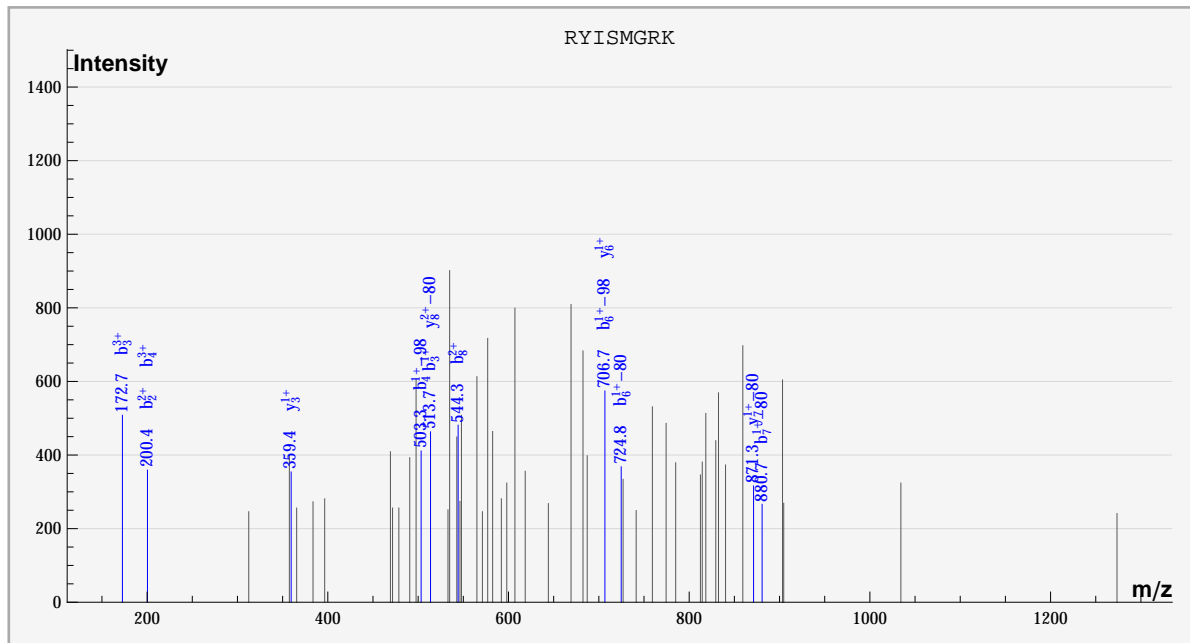

|   | # | b | b* | # | y | y* | P | P* |
|---|---|---|----|---|---|----|---|----|
| R | 1 |   |    |   |   |    |   | ✓  |
| Y | 2 | ✓ |    | 7 |   | ✓  |   |    |
| I | 3 | ✓ |    | 6 | ✓ |    |   |    |
| S | 4 | ✓ | ✓  | 5 |   |    |   |    |
| M | 5 |   |    | 4 |   |    |   |    |
| G | 6 |   | ✓  | 3 | ✓ |    |   |    |
| R | 7 |   | ✓  | 2 |   |    |   |    |
| K | 8 | ✓ |    | 1 |   |    |   |    |

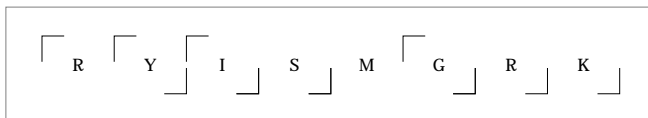

dbValid true FQEEAYNK PHOS(1) 2. 555. -0.279033 5.22124 100. ? 1812.  
 S\_Acido\_new%gi|68566768|gb|AAY79697.1| FQEEAYNK%:::PHOS:::sample\_0%cmpd\_514

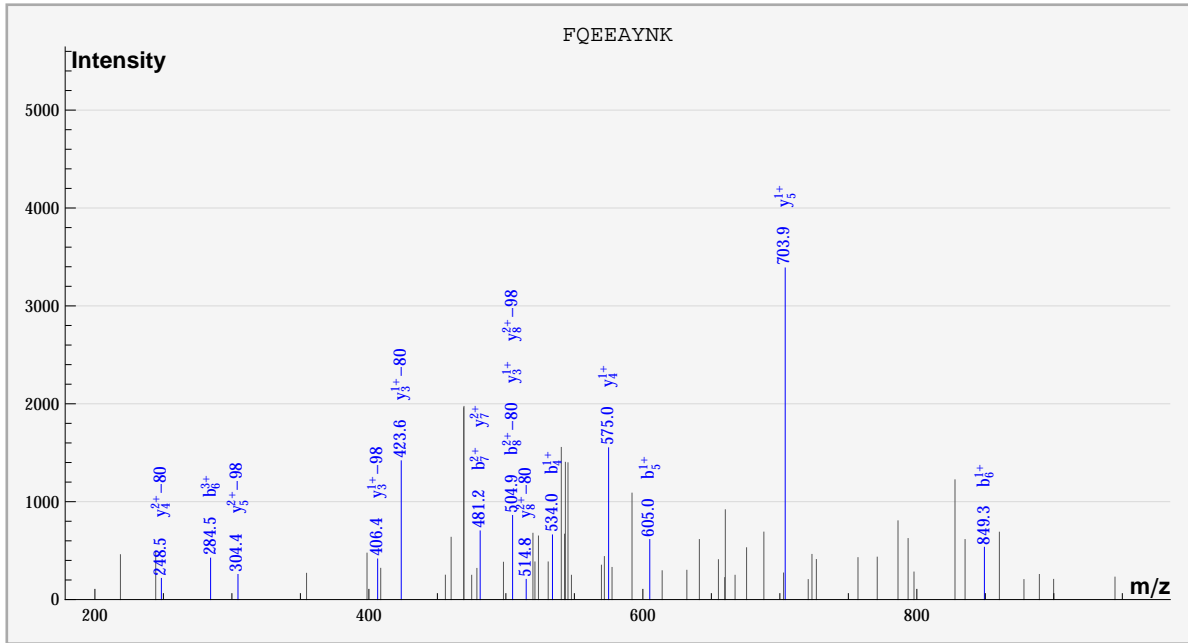

|   | # | b | b* | # | y | y* | P | P* |
|---|---|---|----|---|---|----|---|----|
| F | 1 |   |    |   |   |    |   | ✓  |
| Q | 2 |   |    | 7 | ✓ |    |   |    |
| E | 3 |   |    | 6 |   |    |   |    |
| E | 4 | ✓ |    | 5 | ✓ | ✓  |   |    |
| A | 5 | ✓ |    | 4 | ✓ | ✓  |   |    |
| Y | 6 | ✓ |    | 3 | ✓ | ✓  |   |    |
| N | 7 | ✓ |    | 2 |   |    |   |    |
| K | 8 |   | ✓  | 1 |   |    |   |    |

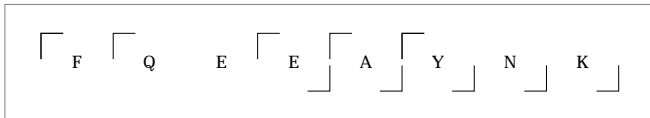

dbValid true STTDSVKK PHOS(3) 2. 555. -1.81564 5.43137 100. ? 2070.

S\_Acido\_new%gi|68567326|gb|AAy80255.1| STTDSVKK%:PHOS:PHOS:::PHOS:::%sample\_0%cmpd\_739

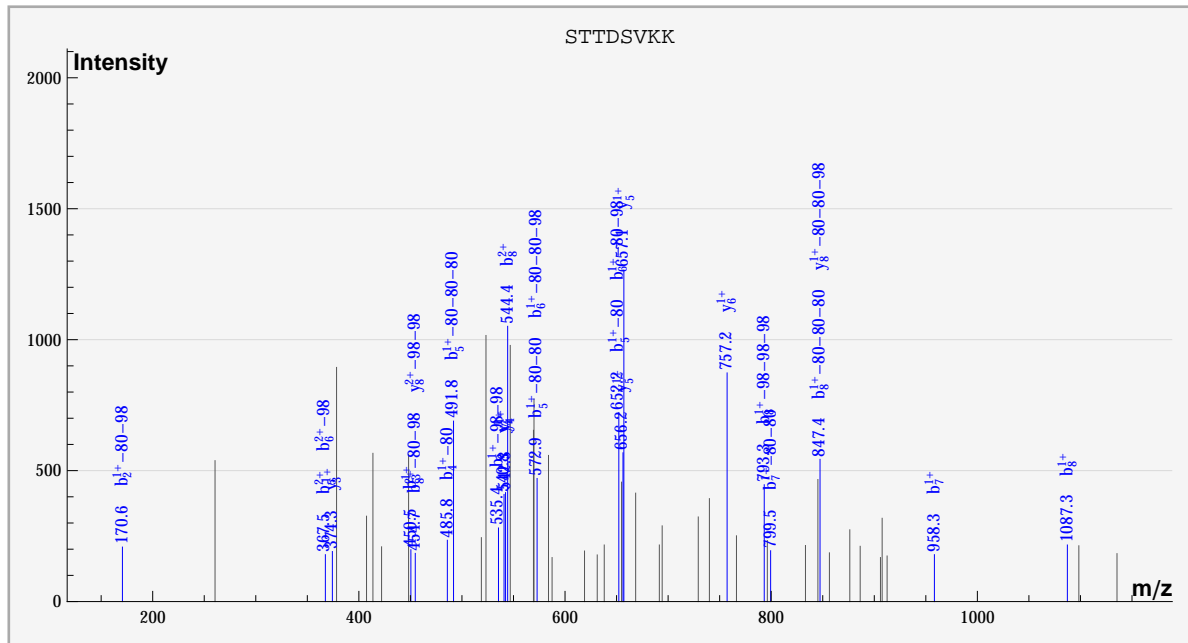

|   | # | b | b* | # | y | y* | P | P* |
|---|---|---|----|---|---|----|---|----|
| S | 1 |   |    |   |   |    |   | ✓  |
| T | 2 |   | ✓  | 7 |   |    |   |    |
| T | 3 | ✓ |    | 6 | ✓ |    |   |    |
| D | 4 |   | ✓  | 5 | ✓ |    |   |    |
| S | 5 | ✓ | ✓  | 4 | ✓ |    |   |    |
| V | 6 |   | ✓  | 3 | ✓ |    |   |    |
| K | 7 | ✓ | ✓  | 2 |   |    |   |    |
| K | 8 | ✓ | ✓  | 1 |   |    |   |    |

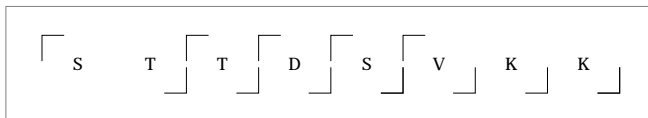



dbValid true SDEYIYR PHOS(2) 2. 555. -1.81444 5.63135 100. ? 2124.

S\_Acido\_new%gi|68567522|gb|AAY80451.1| SDEYIYR%:PHOS:::PHOS::%sample\_3%cmpd\_818

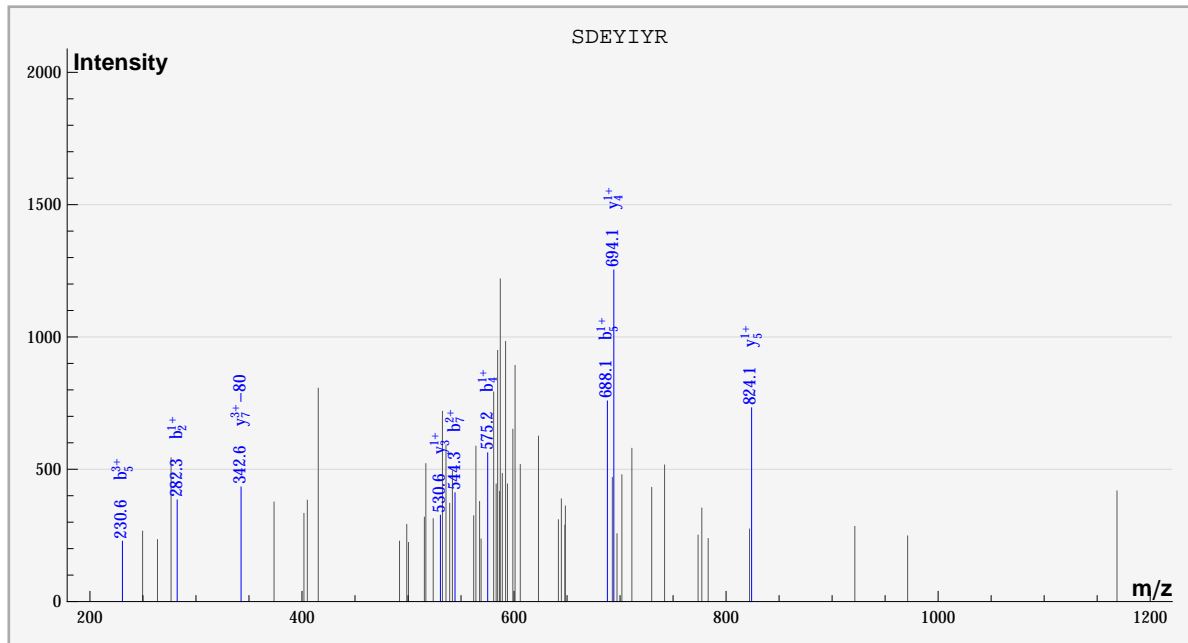

|   | # | b | b* | # | y | y* | P | P* |
|---|---|---|----|---|---|----|---|----|
| S | 1 |   |    |   |   |    |   | ✓  |
| D | 2 | ✓ |    | 6 |   |    |   |    |
| E | 3 |   |    | 5 | ✓ |    |   |    |
| Y | 4 | ✓ |    | 4 | ✓ |    |   |    |
| I | 5 | ✓ |    | 3 | ✓ |    |   |    |
| Y | 6 |   |    | 2 |   |    |   |    |
| R | 7 | ✓ |    | 1 |   |    |   |    |

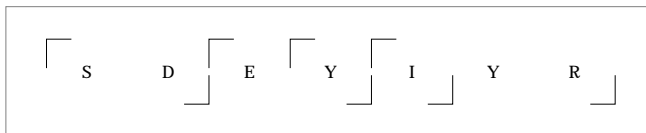

dbValid true GKKVLVTER PHOS(1) 2. 555. 0.307537 5.03613 100. ? 2184.  
 S\_Acido\_new%gi|68566825|gb|AAY79754.1| GKKVLVTER%:::PHOS:::sample\_2%compd\_870

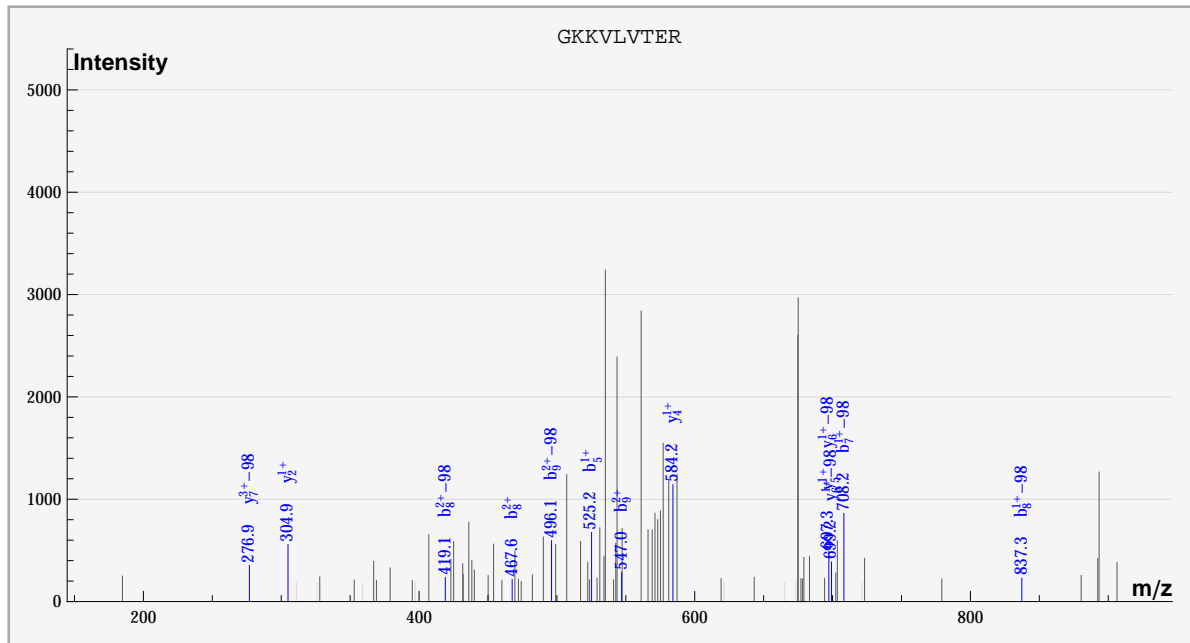

|   | # | b | b* | # | y | y* | P | P* |
|---|---|---|----|---|---|----|---|----|
| G | 1 |   |    |   |   |    |   |    |
| K | 2 |   |    | 8 |   |    |   |    |
| K | 3 |   |    | 7 |   | ✓  |   |    |
| V | 4 |   |    | 6 |   | ✓  |   |    |
| L | 5 | ✓ |    | 5 | ✓ |    |   |    |
| V | 6 |   |    | 4 | ✓ |    |   |    |
| T | 7 |   | ✓  | 3 |   |    |   |    |
| E | 8 | ✓ | ✓  | 2 | ✓ |    |   |    |
| R | 9 | ✓ | ✓  | 1 |   |    |   |    |

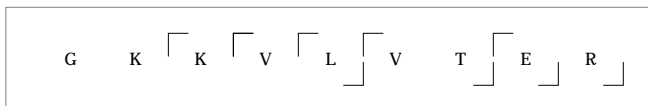

Supplement: supp_M113.027375_mcp.M113.027375-11.pdf [file supp_M113.027375_mcp.M113.027375-11.pdf]
