# Supplementary material
Source: PubMed Central journal article supplement (PMC3861733)

dbValid true GRTALITGSAKR PHOS(1) 2. 657. -1.14937 5.0954 100. ? 2190.

S\_Acido\_new%gi|68567525|gb|AA80454.1| GRTALITGSAKR%:::PHOS:::sample\_2%compd\_822

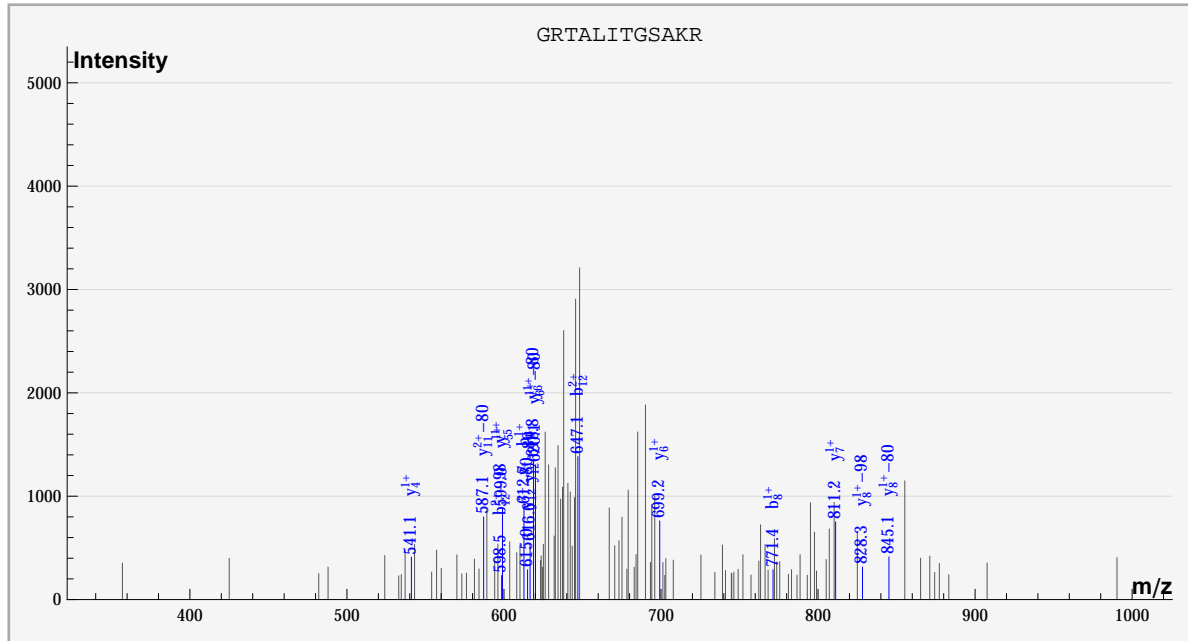

|   | #  | b | b* | #  | y | y* | P | P* |
|---|----|---|----|----|---|----|---|----|
| G | 1  |   |    |    |   |    |   | ✓  |
| R | 2  |   |    | 11 |   | ✓  |   |    |
| T | 3  |   |    | 10 |   |    |   |    |
| A | 4  |   |    | 9  |   |    |   |    |
| L | 5  |   |    | 8  |   | ✓  |   |    |
| I | 6  | ✓ |    | 7  | ✓ |    |   |    |
| T | 7  |   |    | 6  | ✓ | ✓  |   |    |
| G | 8  | ✓ |    | 5  | ✓ |    |   |    |
| S | 9  |   |    | 4  | ✓ |    |   |    |
| A | 10 |   |    | 3  |   |    |   |    |
| K | 11 |   |    | 2  |   |    |   |    |
| R | 12 | ✓ | ✓  | 1  |   |    |   |    |

G R T A L I T G S A K R

dbConflictWinner true YKRVVLGELR PHOS(1) 2. 658. -1.13953 5.88324 100. ? 1236.  
 S\_Acido\_new%gi|68568308|gb|AAY81237.1| YKRVVLGELR%:PHOS:.....%sample\_2%cmpd\_18

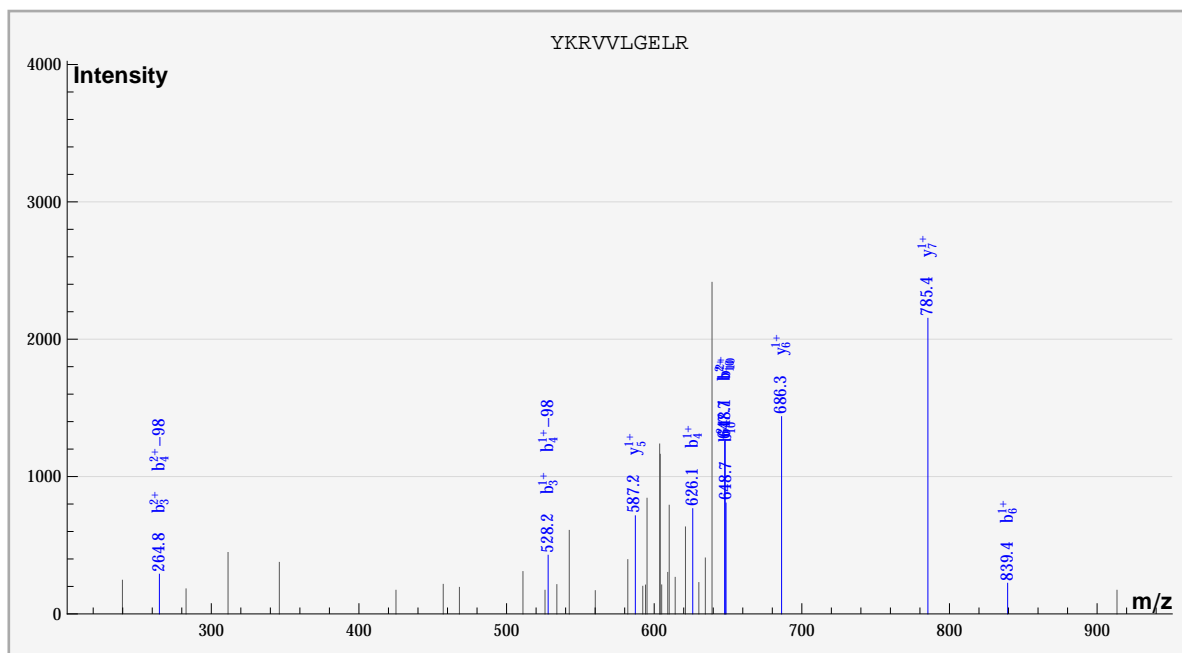

|   | #  | b | b* | # | y | y* | P | P* |
|---|----|---|----|---|---|----|---|----|
| Y | 1  |   |    |   |   |    |   |    |
| K | 2  |   |    | 9 |   |    |   |    |
| R | 3  | ✓ |    | 8 |   |    |   |    |
| V | 4  | ✓ | ✓  | 7 | ✓ |    |   |    |
| V | 5  |   |    | 6 | ✓ |    |   |    |
| L | 6  | ✓ |    | 5 | ✓ |    |   |    |
| G | 7  |   |    | 4 |   |    |   |    |
| E | 8  |   |    | 3 |   |    |   |    |
| L | 9  |   |    | 2 |   |    |   |    |
| R | 10 | ✓ |    | 1 |   |    |   |    |

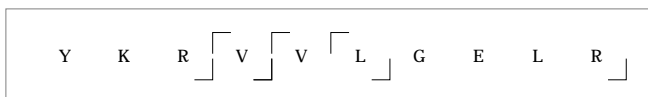

dbValid true YKRVVLGELR PHOS(1) 2. 658. -1.13953 5.02099 100. ? 1248.

S\_Acido\_new%gi|68568308|gb|AAY81237.1| YKRVVLGELR%:PHOS:.....:sample\_2%cmpd\_28

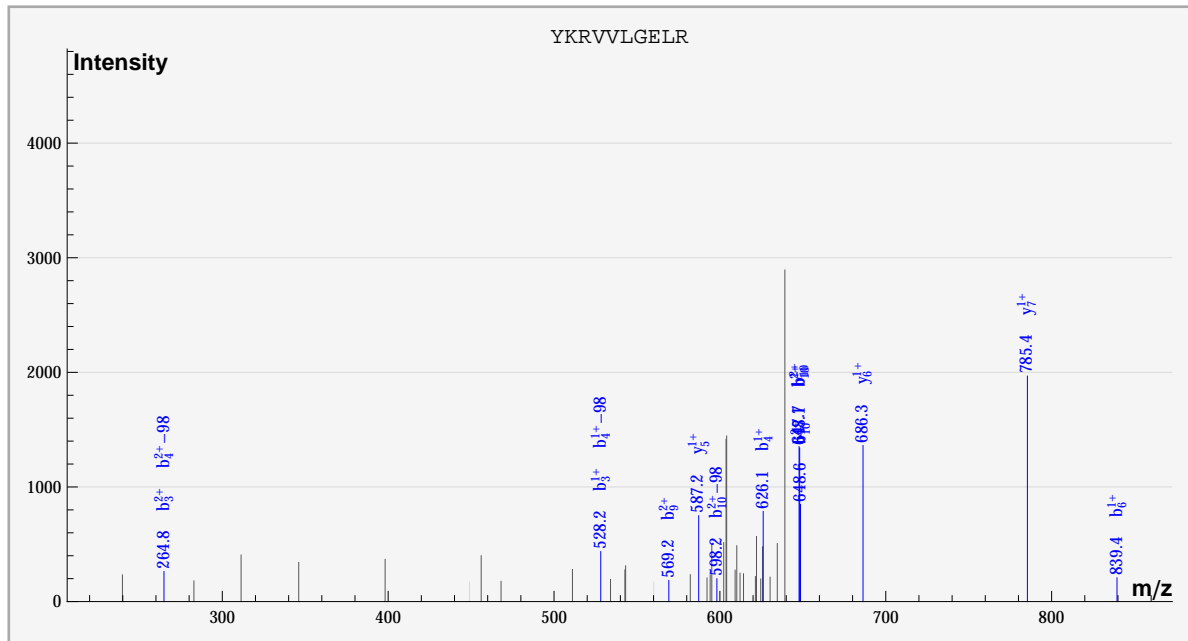

|   | #  | b | b* | # | y | y* | P | P* |
|---|----|---|----|---|---|----|---|----|
| Y | 1  |   |    |   |   |    |   |    |
| K | 2  |   |    | 9 |   |    |   |    |
| R | 3  | ✓ |    | 8 |   |    |   |    |
| V | 4  | ✓ | ✓  | 7 | ✓ |    |   |    |
| V | 5  |   |    | 6 | ✓ |    |   |    |
| L | 6  | ✓ |    | 5 | ✓ |    |   |    |
| G | 7  |   |    | 4 |   |    |   |    |
| E | 8  |   |    | 3 |   |    |   |    |
| L | 9  | ✓ |    | 2 |   |    |   |    |
| R | 10 | ✓ | ✓  | 1 |   |    |   |    |

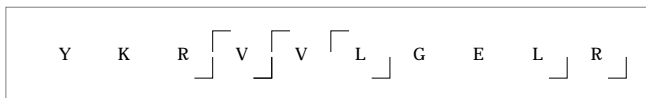

dbValid true YKRVVLGELR PHOS(1) 2. 658. -1.13953 5.26274 100. ? 1260.  
 S\_Acido\_new%gi|68568308|gb|AAY81237.1| YKRVVLGELR%:PHOS:.....%sample\_2%cmpd\_38

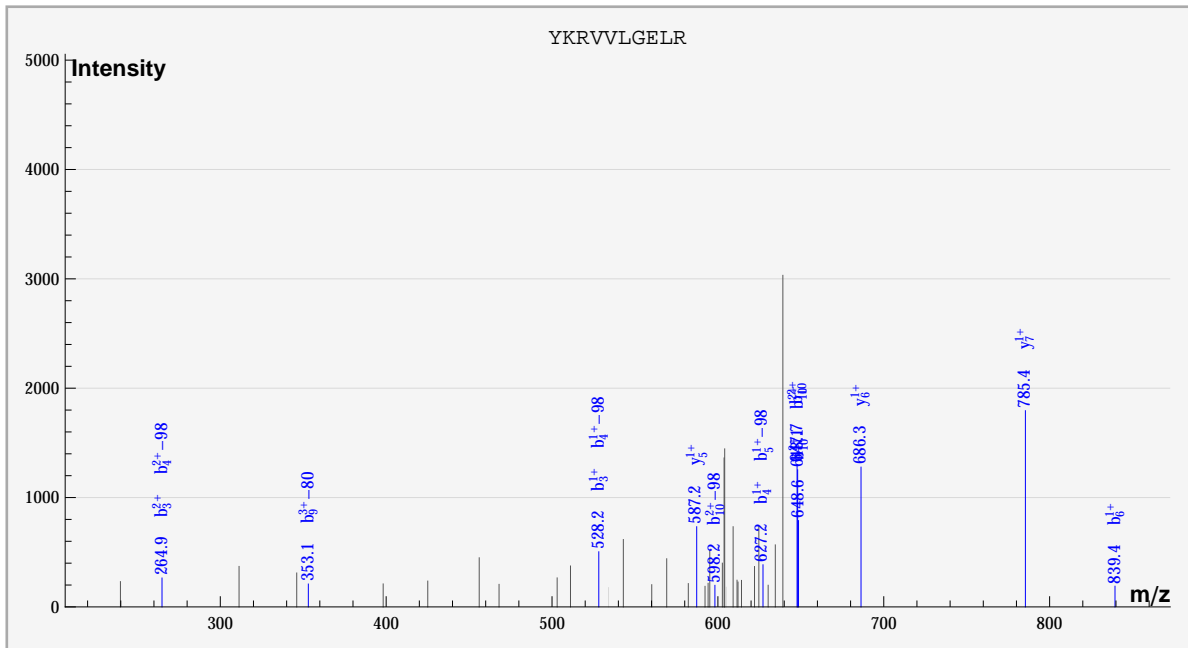

|   | #  | b | b* | # | y | y* | P | P* |
|---|----|---|----|---|---|----|---|----|
| Y | 1  |   |    | 9 |   |    |   |    |
| K | 2  |   |    | 8 |   |    |   |    |
| R | 3  | ✓ |    | 7 | ✓ |    |   |    |
| V | 4  | ✓ | ✓  | 6 | ✓ |    |   |    |
| V | 5  |   | ✓  | 5 | ✓ |    |   |    |
| L | 6  | ✓ |    | 4 |   |    |   |    |
| G | 7  |   |    | 3 |   |    |   |    |
| E | 8  |   |    | 2 |   |    |   |    |
| L | 9  |   | ✓  | 1 |   |    |   |    |
| R | 10 | ✓ | ✓  |   |   |    |   |    |

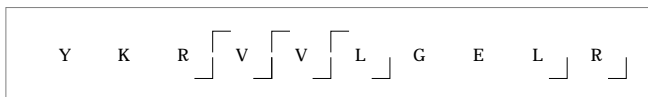

dbConflictWinner true YKRVVLGELR PHOS(1) 2. 658. -1.13953 5.86145 100. ? 1272.  
 S\_Acido\_new%gi68568308|gb|AAY81237.1| YKRVVLGELR%:PHOS:::sample\_2%compd\_48

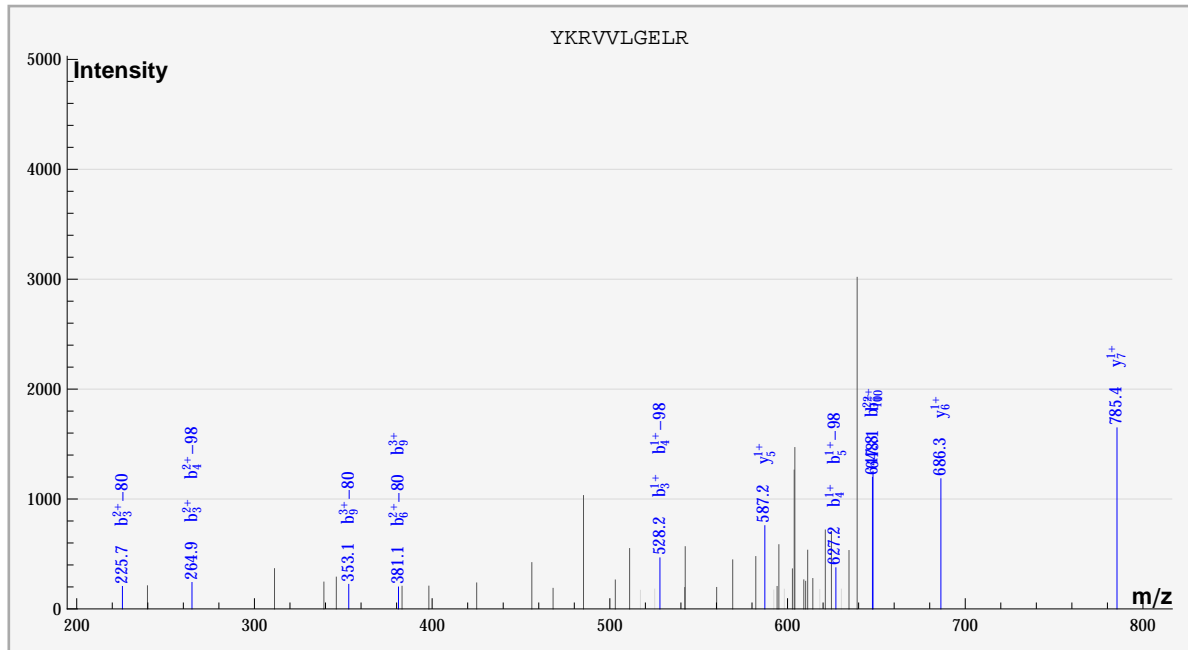

|   | #  | b | b* | # | y | y* | P | P* |
|---|----|---|----|---|---|----|---|----|
| Y | 1  |   |    |   |   |    |   |    |
| K | 2  |   |    | 9 |   |    |   |    |
| R | 3  | ✓ | ✓  | 8 |   |    |   |    |
| V | 4  | ✓ | ✓  | 7 | ✓ |    |   |    |
| V | 5  |   | ✓  | 6 | ✓ |    |   |    |
| L | 6  |   | ✓  | 5 | ✓ |    |   |    |
| G | 7  |   |    | 4 |   |    |   |    |
| E | 8  |   |    | 3 |   |    |   |    |
| L | 9  | ✓ | ✓  | 2 |   |    |   |    |
| R | 10 | ✓ |    | 1 |   |    |   |    |

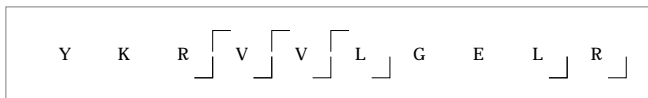

dbConflictWinner true YKRVVLGELR PHOS(1) 2. 658. -1.13953 5.7613 100. ? 1320.  
 S\_Acido\_new%gi|68568308|gb|AAY81237.1| YKRVVLGELR%:PHOS::::::::::%sample\_2%cmpd\_86

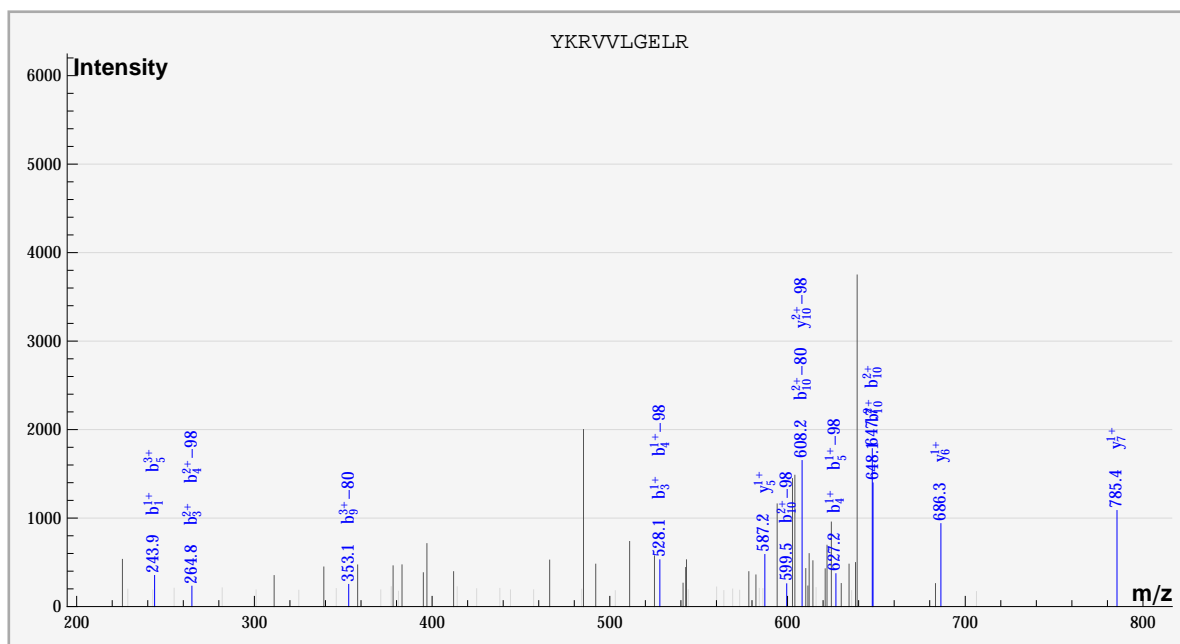

|   | #  | b | b* | # | y | y* | P | P* |
|---|----|---|----|---|---|----|---|----|
| Y | 1  | ✓ |    |   |   |    |   | ✓  |
| K | 2  |   |    | 9 |   |    |   |    |
| R | 3  | ✓ |    | 8 |   |    |   |    |
| V | 4  | ✓ | ✓  | 7 | ✓ |    |   |    |
| V | 5  | ✓ | ✓  | 6 | ✓ |    |   |    |
| L | 6  |   |    | 5 | ✓ |    |   |    |
| G | 7  |   |    | 4 |   |    |   |    |
| E | 8  |   |    | 3 |   |    |   |    |
| L | 9  |   | ✓  | 2 |   |    |   |    |
| R | 10 | ✓ | ✓  | 1 |   |    |   |    |

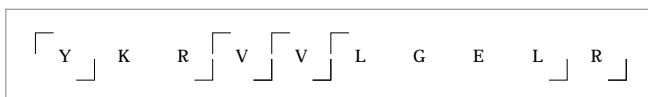

dbConflictWinner true YKRVVLGELR PHOS(1) 2. 658. -1.13953 6.44053 100. ? 1338.  
 S\_Acido\_new%gi|68568308|gb|AAY81237.1| YKRVVLGELR%:PHOS::::::::::%sample\_2%cmpd\_96

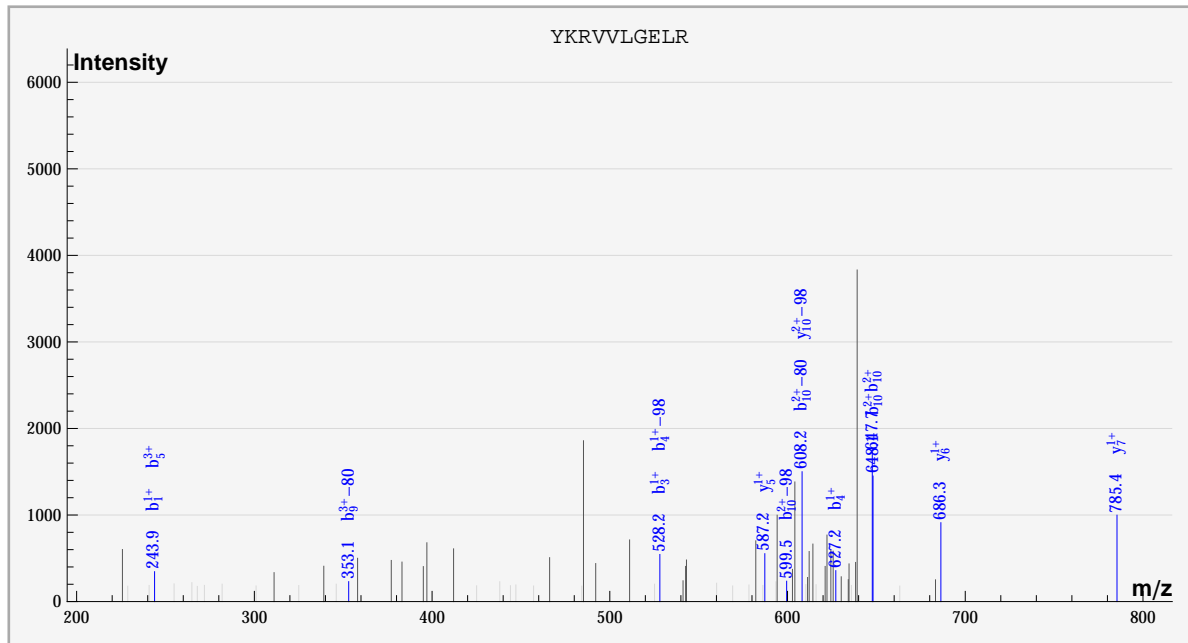

|   | #  | b | b* | # | y | y* | P | P* |
|---|----|---|----|---|---|----|---|----|
| Y | 1  | ✓ |    |   |   |    |   | ✓  |
| K | 2  |   |    | 9 |   |    |   |    |
| R | 3  | ✓ |    | 8 |   |    |   |    |
| V | 4  | ✓ | ✓  | 7 | ✓ |    |   |    |
| V | 5  | ✓ |    | 6 | ✓ |    |   |    |
| L | 6  |   |    | 5 | ✓ |    |   |    |
| G | 7  |   |    | 4 |   |    |   |    |
| E | 8  |   |    | 3 |   |    |   |    |
| L | 9  |   | ✓  | 2 |   |    |   |    |
| R | 10 | ✓ | ✓  | 1 |   |    |   |    |

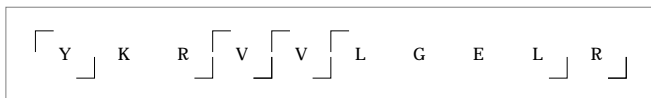

dbValid true YKRVVLGELR PHOS(1) 2. 658. -1.13953 5.97831 100. ? 1350.  
 S\_Acido\_new%gi|68568308|gb|AA81237.1| YKRVVLGELR%:PHOS:::sample\_2%compd\_105

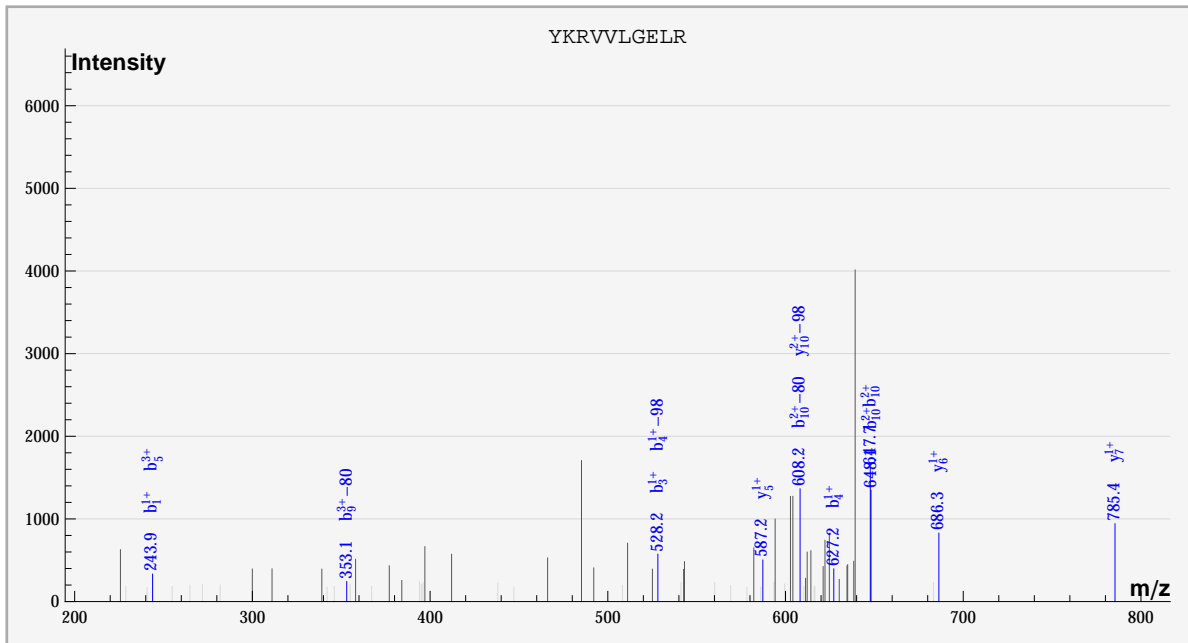

|   | #  | b | b* | # | y | y* | P | P* |
|---|----|---|----|---|---|----|---|----|
| Y | 1  | ✓ |    |   |   |    |   | ✓  |
| K | 2  |   |    | 9 |   |    |   |    |
| R | 3  | ✓ |    | 8 |   |    |   |    |
| V | 4  | ✓ | ✓  | 7 | ✓ |    |   |    |
| V | 5  | ✓ |    | 6 | ✓ |    |   |    |
| L | 6  |   |    | 5 | ✓ |    |   |    |
| G | 7  |   |    | 4 |   |    |   |    |
| E | 8  |   |    | 3 |   |    |   |    |
| L | 9  |   | ✓  | 2 |   |    |   |    |
| R | 10 | ✓ | ✓  | 1 |   |    |   |    |

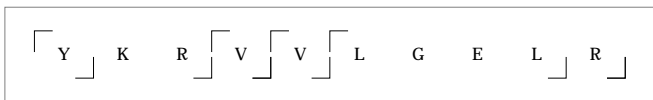



dbValid true YKRVVLGELR PHOS(1) 2. 658. -1.13953 5.56559 100. ? 1356.  
 S\_Acido\_new%gi|68568308|gb|AAy81237.1| YKRVVLGELR%:PHOS:::sample\_2%compd\_115

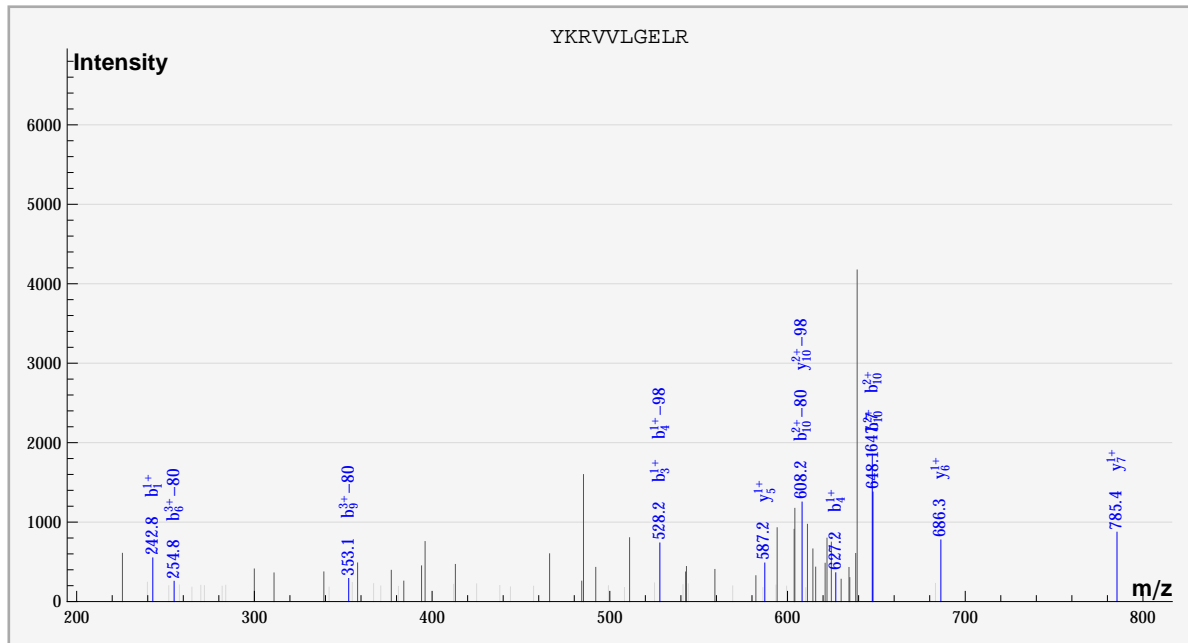

|   | #  | b | b* | # | y | y* | P | P* |
|---|----|---|----|---|---|----|---|----|
| Y | 1  | ✓ |    |   |   |    |   | ✓  |
| K | 2  |   |    | 9 |   |    |   |    |
| R | 3  | ✓ |    | 8 |   |    |   |    |
| V | 4  | ✓ | ✓  | 7 | ✓ |    |   |    |
| V | 5  |   |    | 6 | ✓ |    |   |    |
| L | 6  |   | ✓  | 5 | ✓ |    |   |    |
| G | 7  |   |    | 4 |   |    |   |    |
| E | 8  |   |    | 3 |   |    |   |    |
| L | 9  |   | ✓  | 2 |   |    |   |    |
| R | 10 | ✓ | ✓  | 1 |   |    |   |    |

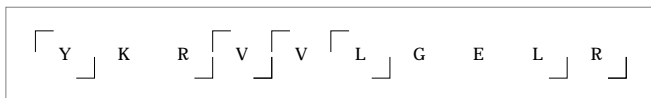

dbValid true KIIISGPPGSGK PHOS(2) 2. 658. -0.683103 5.08361 100. ? 1404.  
 S\_Acido\_new%gi|68567033|gb|AA79962.1| KIIISGPPGSGK%::::PHOS::::PHOS:::%sample\_2%compd\_156

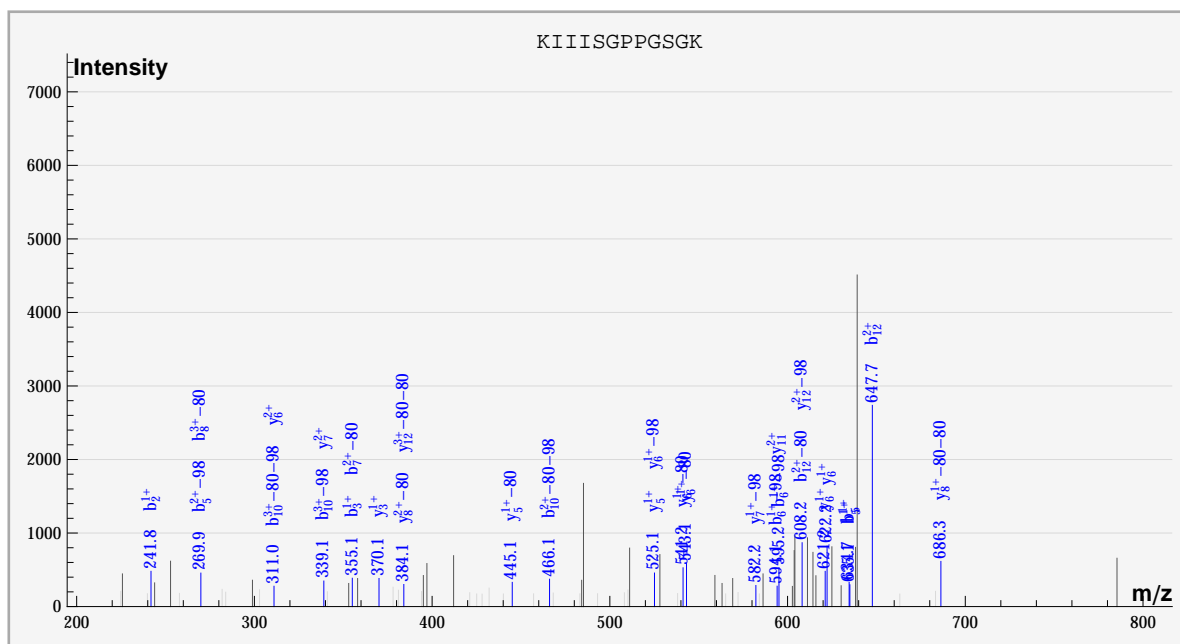

|   | #  | b | b* | #  | y | y* | P | P* |
|---|----|---|----|----|---|----|---|----|
| K | 1  |   |    |    |   |    |   | ✓  |
| I | 2  | ✓ |    | 11 | ✓ |    |   |    |
| I | 3  | ✓ |    | 10 |   |    |   |    |
| I | 4  |   |    | 9  |   |    |   |    |
| S | 5  | ✓ | ✓  | 8  |   | ✓  |   |    |
| G | 6  | ✓ | ✓  | 7  | ✓ | ✓  |   |    |
| P | 7  | ✓ | ✓  | 6  | ✓ | ✓  |   |    |
| P | 8  | ✓ | ✓  | 5  | ✓ | ✓  |   |    |
| G | 9  |   |    | 4  |   |    |   |    |
| S | 10 | ✓ |    | 3  | ✓ |    |   |    |
| G | 11 |   |    | 2  |   |    |   |    |
| K | 12 | ✓ | ✓  | 1  |   |    |   |    |

「 K 「 I 「 I 「 I 「 S 「 G 「 P 「 P 「 G 「 S 「 G 「 K 」

dbValid true KIIISGPPGSGK PHOS(2) 2. 658. -0.683103 5.09012 100. ? 1416.  
 S\_Acido\_new%gi|68567033|gb|AA79962.1| KIIISGPPGSGK%::::PHOS::::PHOS:::%sample\_2%compd\_167

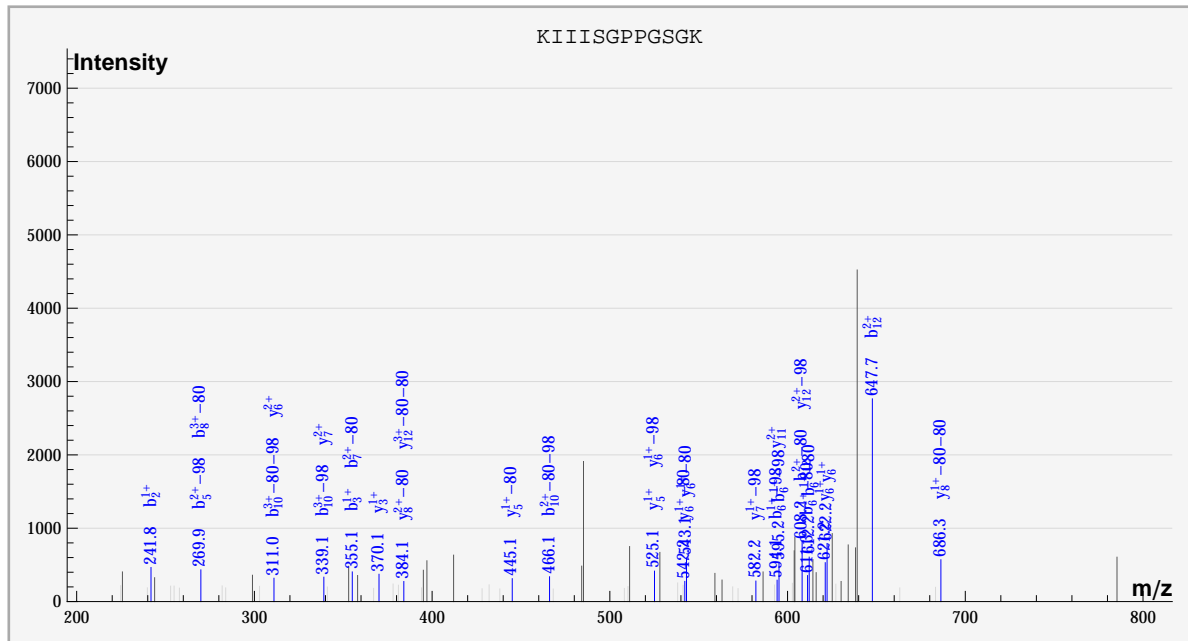

|   | #  | b | b* | #  | y | y* | P | P* |
|---|----|---|----|----|---|----|---|----|
| K | 1  |   |    |    |   |    |   | ✓  |
| I | 2  | ✓ |    | 11 | ✓ |    |   |    |
| I | 3  | ✓ |    | 10 |   |    |   |    |
| I | 4  |   |    | 9  |   |    |   |    |
| S | 5  |   | ✓  | 8  |   | ✓  |   |    |
| G | 6  |   | ✓  | 7  | ✓ | ✓  |   |    |
| P | 7  |   | ✓  | 6  | ✓ | ✓  |   |    |
| P | 8  |   | ✓  | 5  | ✓ | ✓  |   |    |
| G | 9  |   |    | 4  |   |    |   |    |
| S | 10 |   | ✓  | 3  | ✓ |    |   |    |
| G | 11 |   |    | 2  |   |    |   |    |
| K | 12 | ✓ | ✓  | 1  |   |    |   |    |

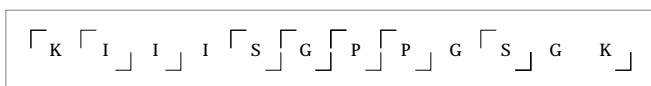

dbValid true EYKIPVLVDR PHOS(1) 2. 658. -1.66097 4.96988 100. ? 1854.

S\_Acido\_new%gi|68567026|gb|AAY79955.1| EYKIPVLVDR%::PHOS:::sample\_3%compd\_565

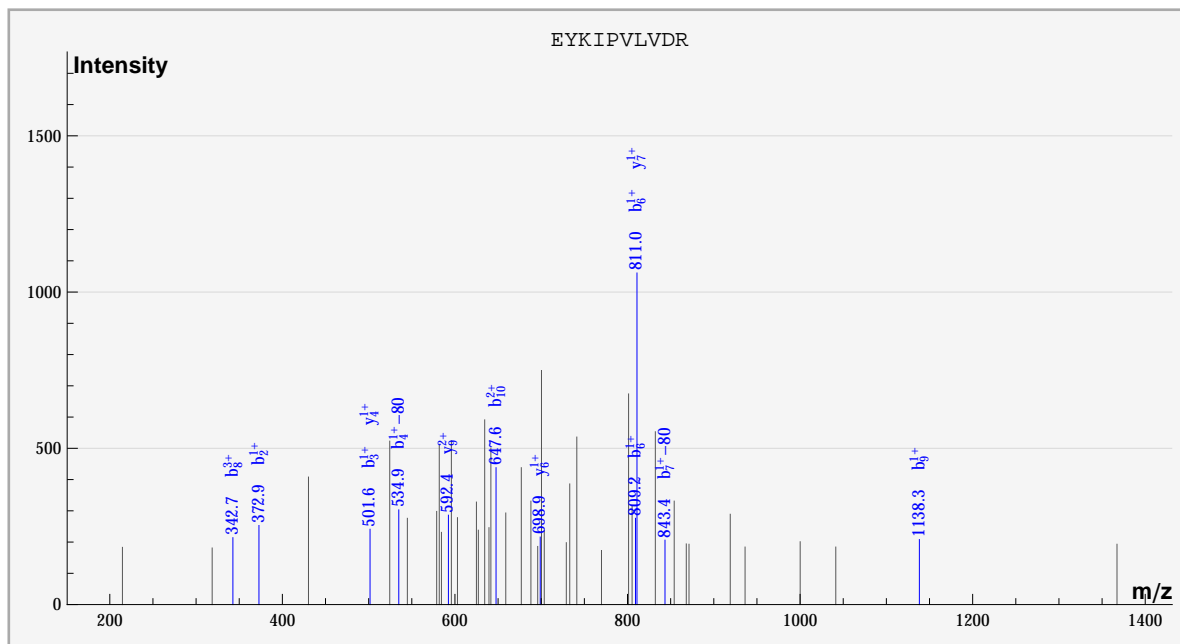

|   | #  | b | b* | # | y | y* | P | P* |
|---|----|---|----|---|---|----|---|----|
| E | 1  |   |    |   |   |    |   |    |
| Y | 2  | ✓ |    | 9 | ✓ |    |   |    |
| K | 3  | ✓ |    | 8 |   |    |   |    |
| I | 4  |   | ✓  | 7 | ✓ |    |   |    |
| P | 5  |   |    | 6 | ✓ |    |   |    |
| V | 6  | ✓ |    | 5 |   |    |   |    |
| L | 7  |   | ✓  | 4 | ✓ |    |   |    |
| V | 8  | ✓ |    | 3 |   |    |   |    |
| D | 9  | ✓ |    | 2 |   |    |   |    |
| R | 10 | ✓ |    | 1 |   |    |   |    |

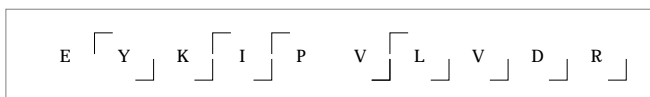

dbValid true IDLSLGENYK PHOS(2) 2. 658. -1.73292 5.07653 100. ? 2220.

S\_Acido\_new%gi|68567105|gb|AA80034.1| IDLSLGENYK%:::PHOS:::PHOS::%sample\_3%cmpd\_897

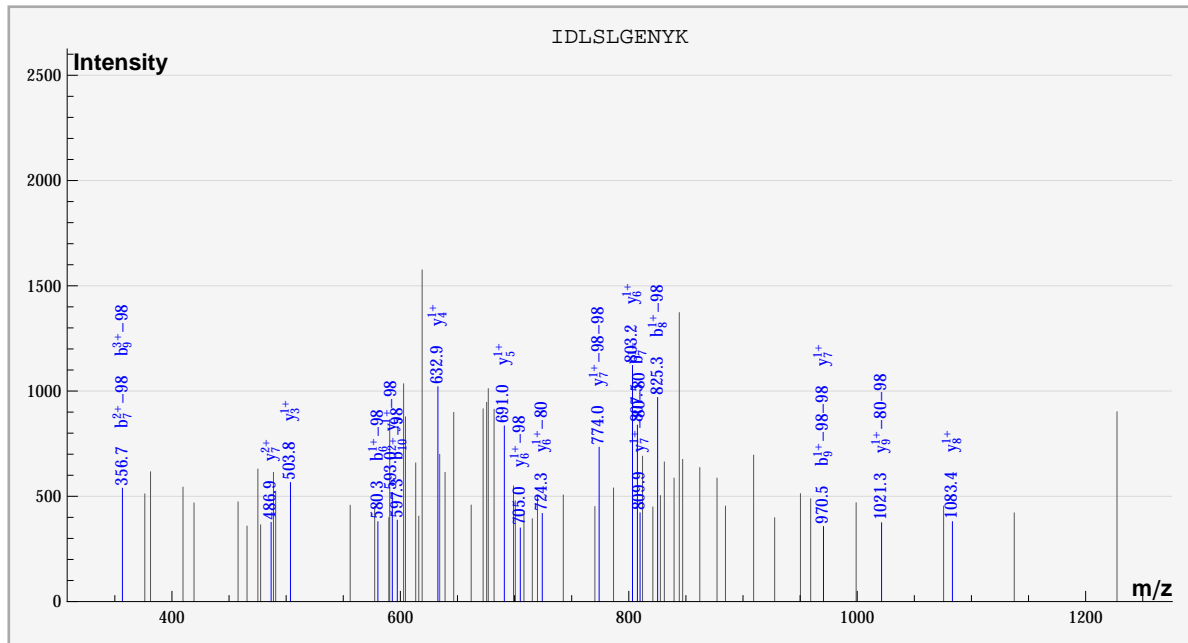

|   | #  | b | b* | # | y | y* | P | P* |
|---|----|---|----|---|---|----|---|----|
| I | 1  |   |    |   |   |    |   |    |
| D | 2  |   |    | 9 |   | ✓  |   |    |
| L | 3  |   |    | 8 | ✓ |    |   |    |
| S | 4  |   |    | 7 | ✓ | ✓  |   |    |
| L | 5  |   |    | 6 | ✓ | ✓  |   |    |
| G | 6  | ✓ |    | 5 | ✓ | ✓  |   |    |
| E | 7  | ✓ | ✓  | 4 | ✓ |    |   |    |
| N | 8  | ✓ |    | 3 | ✓ |    |   |    |
| Y | 9  | ✓ |    | 2 |   |    |   |    |
| K | 10 | ✓ |    | 1 |   |    |   |    |

I D L S L G E N Y K

dbValid true QQYLSKVS RK PHOS(1) 2. 658. 0.839742 5.45136 100. ? 3516.  
 S\_Acido\_new%gi|68566620|gb|AAY79549.1| QQYLSKVS RK%:::PHOS:::sample\_3%compd\_2082

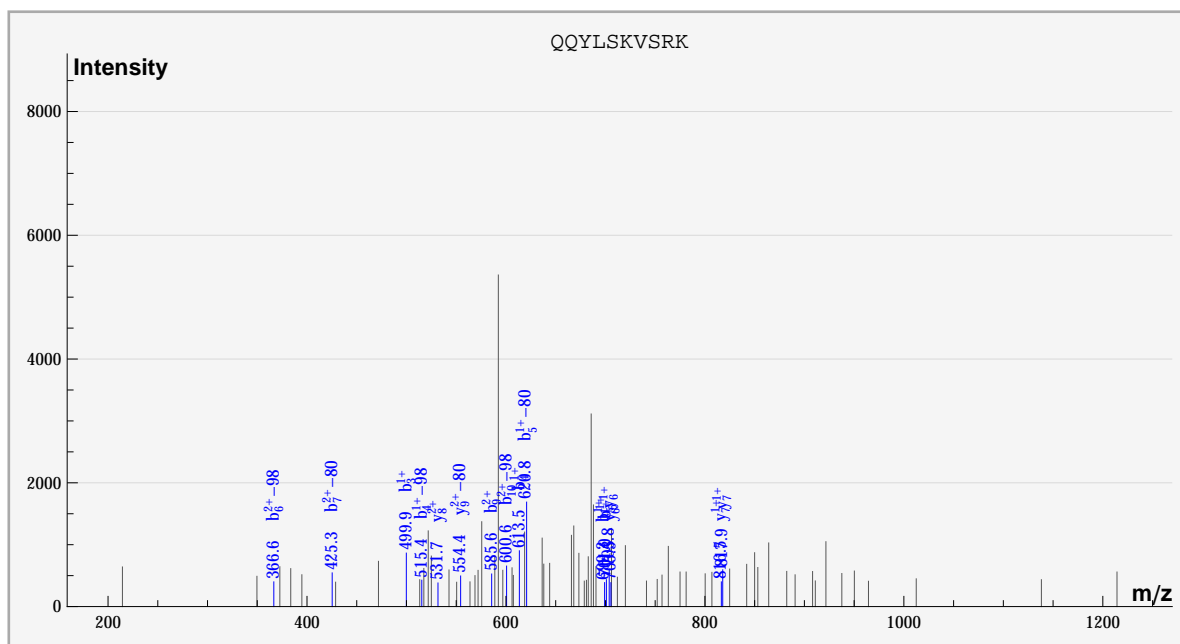

|   | #  | b | b* | # | y | y* | P | P* |
|---|----|---|----|---|---|----|---|----|
| Q | 1  |   |    |   |   |    |   |    |
| Q | 2  |   |    | 9 |   | ✓  |   |    |
| Y | 3  | ✓ |    | 8 | ✓ |    |   |    |
| L | 4  | ✓ | ✓  | 7 | ✓ |    |   |    |
| S | 5  | ✓ | ✓  | 6 | ✓ |    |   |    |
| K | 6  |   | ✓  | 5 |   |    |   |    |
| V | 7  |   | ✓  | 4 |   |    |   |    |
| S | 8  |   |    | 3 |   |    |   |    |
| R | 9  | ✓ |    | 2 |   |    |   |    |
| K | 10 |   | ✓  | 1 |   |    |   |    |

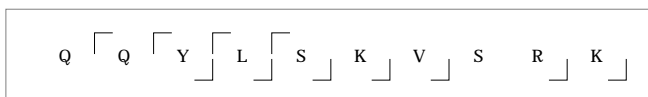

dbValid true KAVILAGGYGKR PHOS(1) 2. 658. -1.13954 5.58571 100. ? 3600.

S\_Acido\_new%gi|68567675|gb|AAY80604.1| KAVILAGGYGKR%:::PHOS:::%sample\_3%compd\_2159

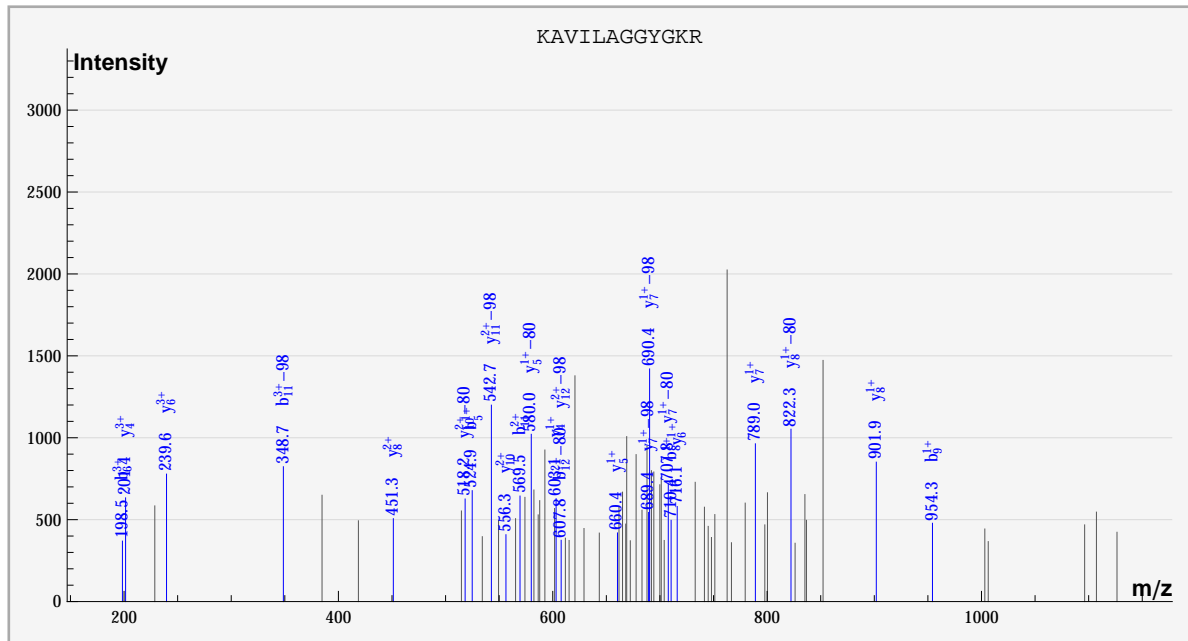

|   | #  | b | b* | #  | y | y* | P | P* |
|---|----|---|----|----|---|----|---|----|
| K | 1  |   |    |    |   |    |   | ✓  |
| A | 2  |   |    | 11 |   | ✓  |   |    |
| V | 3  |   |    | 10 | ✓ | ✓  |   |    |
| I | 4  |   |    | 9  |   |    |   |    |
| L | 5  | ✓ |    | 8  | ✓ | ✓  |   |    |
| A | 6  | ✓ |    | 7  | ✓ | ✓  |   |    |
| G | 7  |   |    | 6  | ✓ |    |   |    |
| G | 8  | ✓ |    | 5  | ✓ | ✓  |   |    |
| Y | 9  | ✓ |    | 4  | ✓ |    |   |    |
| G | 10 |   |    | 3  |   |    |   |    |
| K | 11 | ✓ | ✓  | 2  |   |    |   |    |
| R | 12 |   | ✓  | 1  |   |    |   |    |

[ K ] [ A ] [ V ] [ I ] [ L ] [ A ] [ G ] [ G ] [ Y ] [ G ] [ K ] [ R ]

dbValid true EMEIPAPYKR PHOS(1) 2. 658. -0.698403 5.37525 100. ? 3840.  
 S\_Acido\_new%gi|68568506|gb|AA81435.1| EMEIPAPYKR%:::::PHOS:::sample\_3%compd\_2381

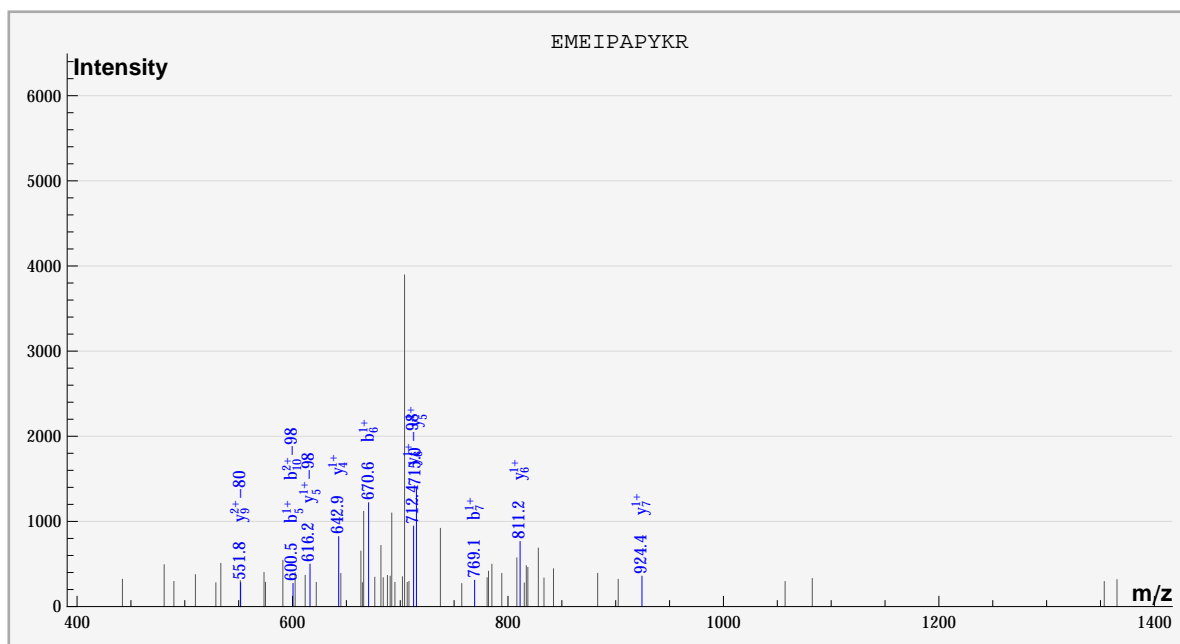

|   | #  | b | b* | # | y | y* | P | P* |
|---|----|---|----|---|---|----|---|----|
| E | 1  |   |    |   |   |    |   |    |
| M | 2  |   |    | 9 |   | ✓  |   |    |
| E | 3  |   |    | 8 |   |    |   |    |
| I | 4  |   |    | 7 | ✓ |    |   |    |
| P | 5  | ✓ |    | 6 | ✓ | ✓  |   |    |
| A | 6  | ✓ |    | 5 | ✓ | ✓  |   |    |
| P | 7  | ✓ |    | 4 | ✓ |    |   |    |
| Y | 8  |   |    | 3 |   |    |   |    |
| K | 9  |   |    | 2 |   |    |   |    |
| R | 10 |   | ✓  | 1 |   |    |   |    |

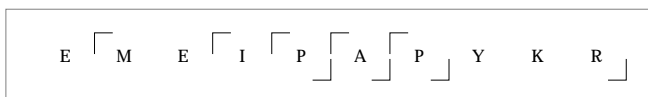



dbValid true FRAPSTTTEVK PHOS(1) 2. 659. -0.184073 5.14573 100. ? 4290.  
 S\_Acido\_new%gi|68568615|gb|AA81544.1| FRAPSTTTEVK%:::PHOS:::sample\_3%compd\_2793

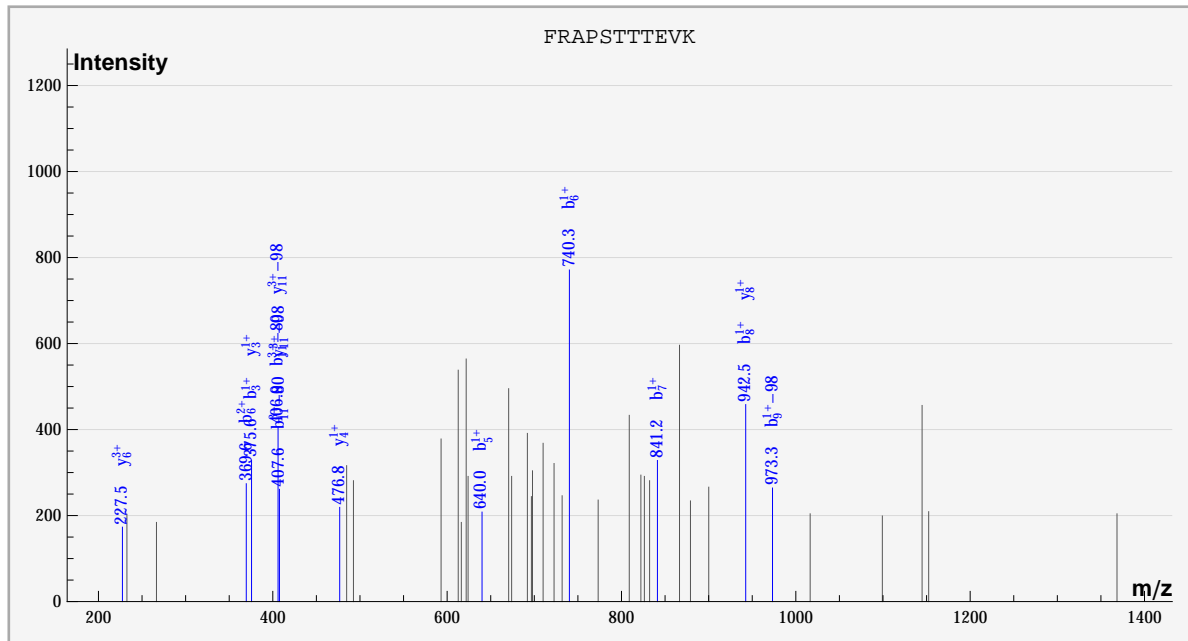

|   | #  | b | b* | #  | y | y* | P | P* |
|---|----|---|----|----|---|----|---|----|
| F | 1  |   |    |    |   |    |   | ✓  |
| R | 2  |   |    | 10 |   |    |   |    |
| A | 3  | ✓ |    | 9  |   |    |   |    |
| P | 4  |   |    | 8  | ✓ |    |   |    |
| S | 5  | ✓ |    | 7  |   |    |   |    |
| T | 6  | ✓ |    | 6  | ✓ |    |   |    |
| T | 7  | ✓ |    | 5  |   |    |   |    |
| T | 8  | ✓ |    | 4  | ✓ |    |   |    |
| E | 9  |   | ✓  | 3  | ✓ |    |   |    |
| V | 10 |   |    | 2  |   |    |   |    |
| K | 11 | ✓ |    | 1  |   |    |   |    |

FRAPSTTTEVK

dbValid true ADVSVS PHOS(1) 1. 659. -1.75092 5.98468 100. ? 444.

S\_Acido\_new%gi|68567062|gb|AAY79991.1| ADVSVS%:::::PHOS:%sample\_3%compd\_2859

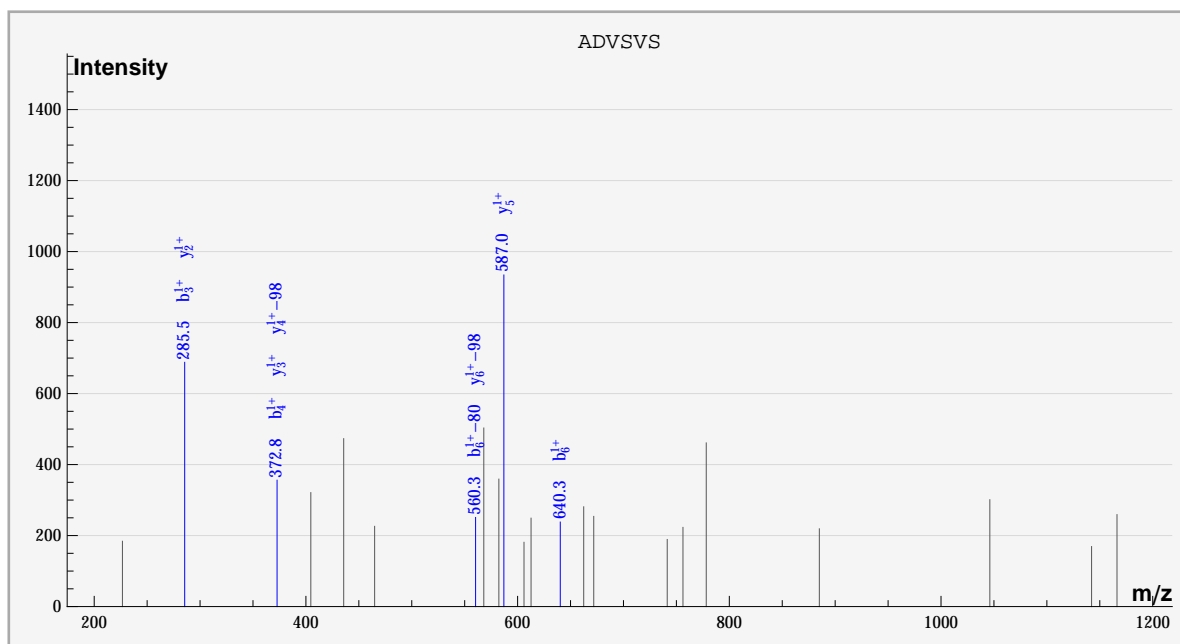

|   | # | b | b* | # | y | y* | P | P* |
|---|---|---|----|---|---|----|---|----|
| A | 1 |   |    |   |   |    |   | ✓  |
| D | 2 |   |    | 5 | ✓ |    |   |    |
| V | 3 | ✓ |    | 4 |   | ✓  |   |    |
| S | 4 | ✓ |    | 3 | ✓ |    |   |    |
| V | 5 |   |    | 2 | ✓ |    |   |    |
| S | 6 | ✓ | ✓  | 1 |   |    |   |    |

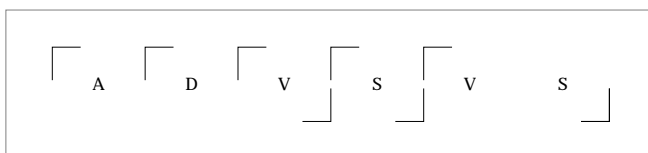

dbValid true MEITEDSKRK PHOS(1) 2. 660. -1.20058 5.64538 100. ? 2700.  
 S\_Acido\_new%gii68566940|gb|AAY79869.1| MEITEDSKRK%::::PHOS:::::sample\_0%compd\_1333

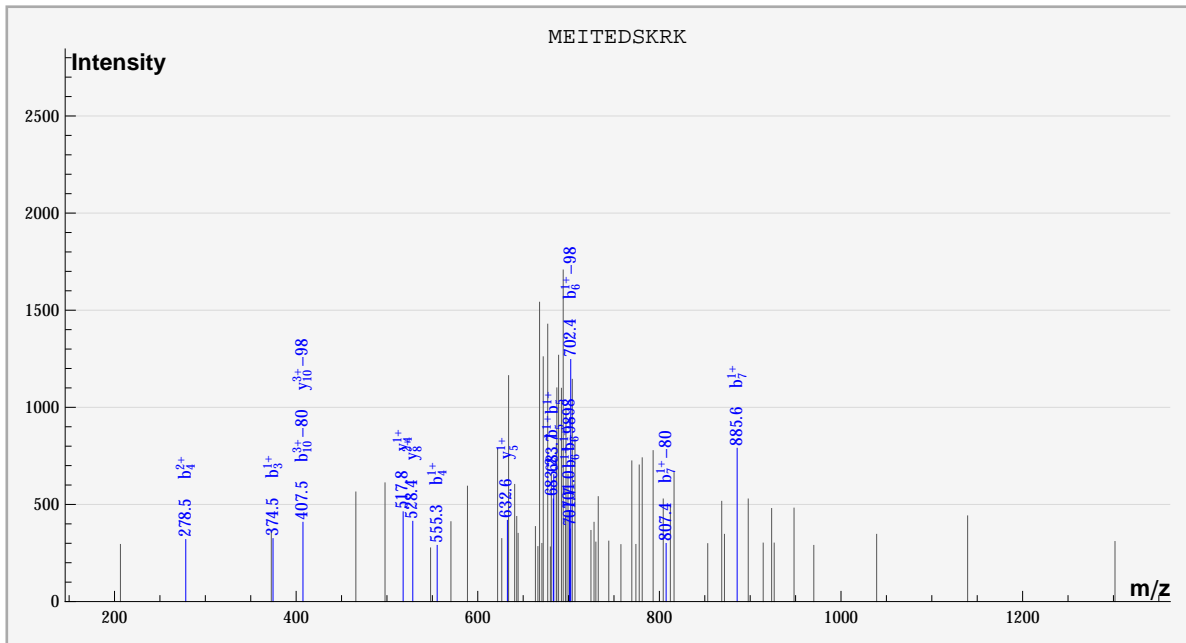

|   | #  | b | b* | # | y | y* | P | P* |
|---|----|---|----|---|---|----|---|----|
| M | 1  |   |    |   |   |    |   | ✓  |
| E | 2  |   |    | 9 |   |    |   |    |
| I | 3  | ✓ |    | 8 | ✓ |    |   |    |
| T | 4  | ✓ |    | 7 |   |    |   |    |
| E | 5  | ✓ |    | 6 |   |    |   |    |
| D | 6  |   | ✓  | 5 | ✓ |    |   |    |
| S | 7  | ✓ | ✓  | 4 | ✓ |    |   |    |
| K | 8  |   |    | 3 |   |    |   |    |
| R | 9  |   |    | 2 |   |    |   |    |
| K | 10 |   | ✓  | 1 |   |    |   |    |

MEITEDSKRK

dbValid true KILYKHVTR PHOS(2) 2. 661. -1.67239 5.08806 100. ? 1650.  
 S\_Acido\_new%gi|68568139|gb|AA81068.1| KILYKHVTR%:::PHOS:::PHOS::%sample\_0%compd\_373

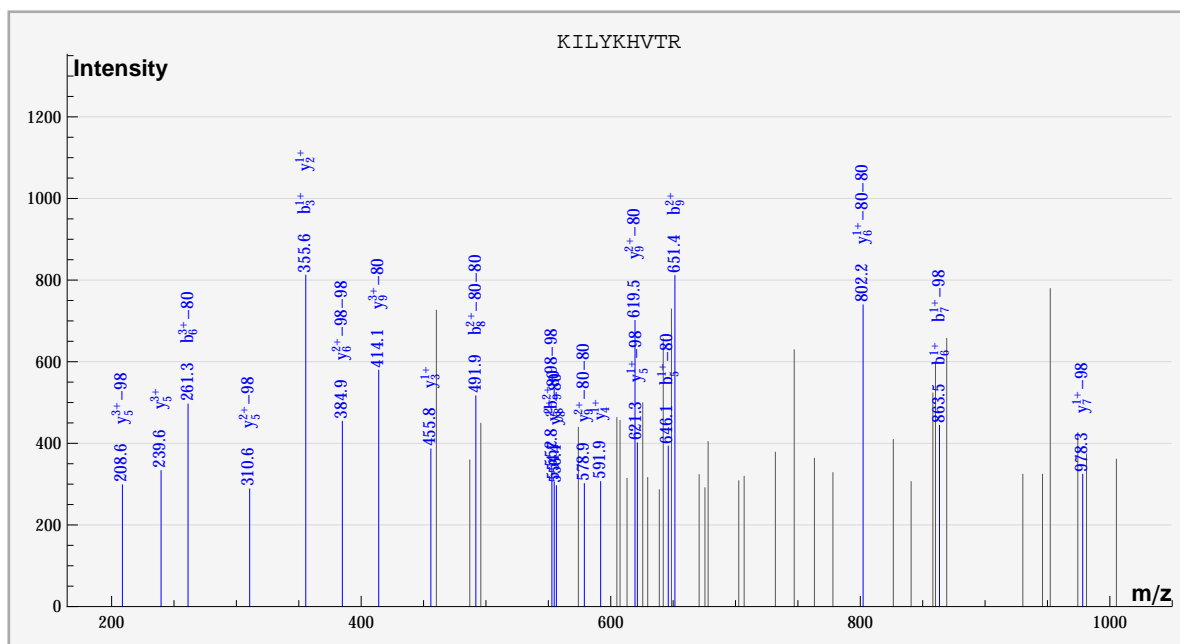

|   | # | b | b* | # | y | y* | P | P* |
|---|---|---|----|---|---|----|---|----|
| K | 1 |   |    |   |   |    |   | ✓  |
| I | 2 |   |    | 8 |   | ✓  |   |    |
| L | 3 | ✓ |    | 7 |   | ✓  |   |    |
| Y | 4 |   |    | 6 |   | ✓  |   |    |
| K | 5 |   | ✓  | 5 | ✓ | ✓  |   |    |
| H | 6 | ✓ | ✓  | 4 | ✓ |    |   |    |
| V | 7 |   | ✓  | 3 | ✓ |    |   |    |
| T | 8 |   | ✓  | 2 | ✓ |    |   |    |
| R | 9 | ✓ | ✓  | 1 |   |    |   |    |

┌ K ┌ I ┌ L ┌ Y ┌ K ┌ H ┌ V ┌ T ┌ R ┘

dbValid true ERYMVIMKR Oxidation\_M(1),PHOS(1) 2. 661. 0.311442 5.44126 100. ? 354.

S\_Acido\_new%gil68568392|gb|AAY81321.1| ERYMVIMKR%:::PHOS:Oxidation\_M:::::%sample\_0%cmpd\_1994

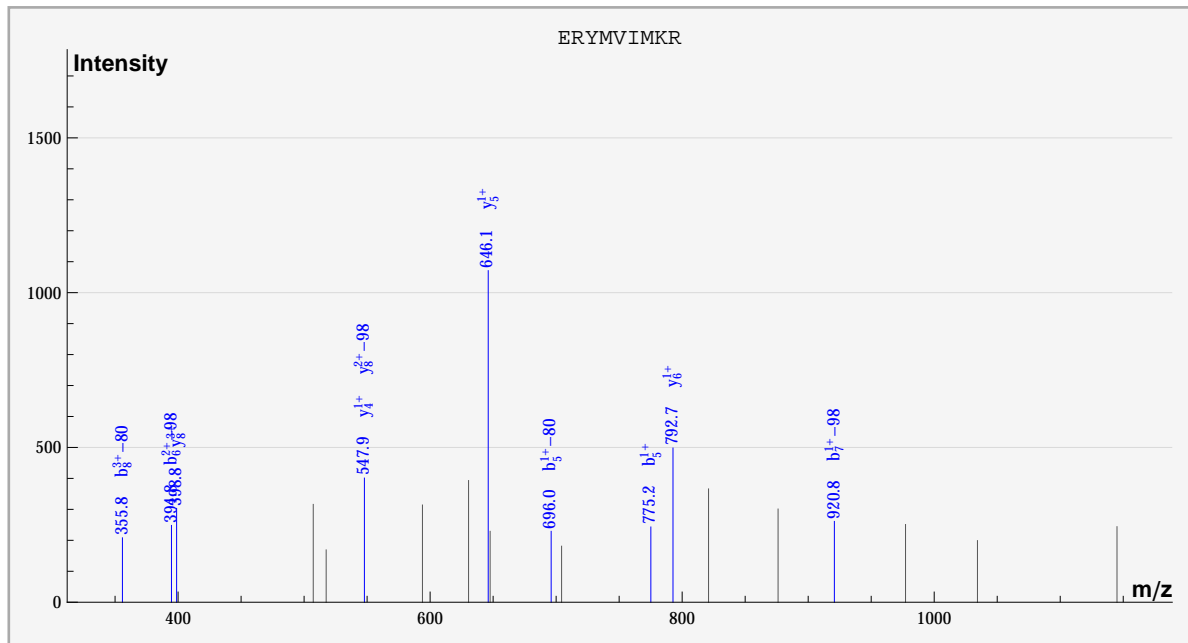

|   | # | b | b* | # | y | y* | P | P* |
|---|---|---|----|---|---|----|---|----|
| E | 1 |   |    |   |   |    |   |    |
| R | 2 |   |    | 8 | ✓ | ✓  |   |    |
| Y | 3 |   |    | 7 |   |    |   |    |
| M | 4 |   |    | 6 | ✓ |    |   |    |
| V | 5 | ✓ | ✓  | 5 | ✓ |    |   |    |
| I | 6 |   | ✓  | 4 | ✓ |    |   |    |
| M | 7 |   | ✓  | 3 |   |    |   |    |
| K | 8 |   | ✓  | 2 |   |    |   |    |
| R | 9 |   |    | 1 |   |    |   |    |

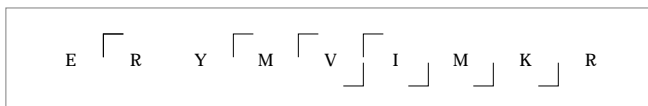

dbValid true RSSQLKLSLK PHOS(2) 2. 661. -0.672193 5.11513 100. ? 3972.  
 S\_Acido\_new%gi|68567464|gb|AAy80393.1| RSSQLKLSLK%:::PHOS:::PHOS:::sample\_0%compd\_2495

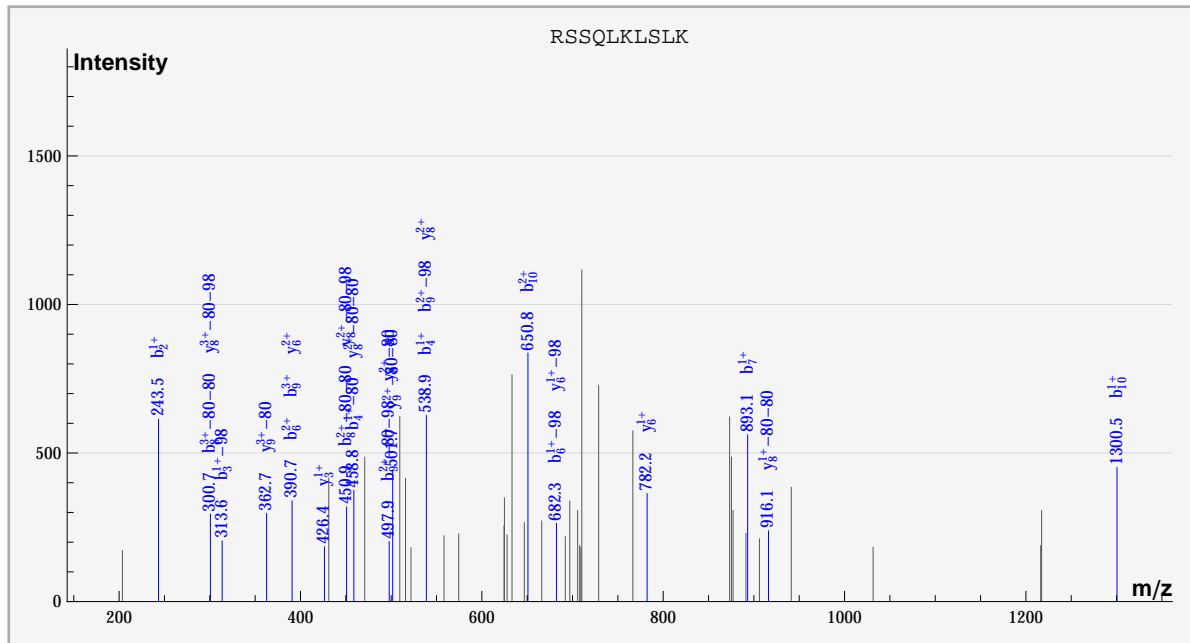

|   | #  | b | b* | # | y | y* | P | P* |
|---|----|---|----|---|---|----|---|----|
| R | 1  |   |    |   |   |    |   |    |
| S | 2  | ✓ |    | 9 |   | ✓  |   |    |
| S | 3  |   | ✓  | 8 | ✓ | ✓  |   |    |
| Q | 4  | ✓ | ✓  | 7 |   |    |   |    |
| L | 5  |   |    | 6 | ✓ | ✓  |   |    |
| K | 6  | ✓ | ✓  | 5 |   |    |   |    |
| L | 7  | ✓ |    | 4 |   |    |   |    |
| S | 8  |   | ✓  | 3 | ✓ |    |   |    |
| L | 9  | ✓ | ✓  | 2 |   |    |   |    |
| K | 10 | ✓ |    | 1 |   |    |   |    |

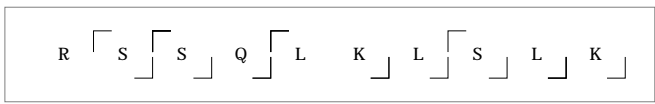

dbValid true YMEWFHRR Oxidation\_M(1),PHOS(1) 2. 661. -0.229203 6.59913 100. ? 4530.  
 S\_Acido\_new%gil68568536|gb|AAY81465.1| YMEWFHRR%:PHOS:Oxidation\_M:::::%sample\_0%compd\_3005

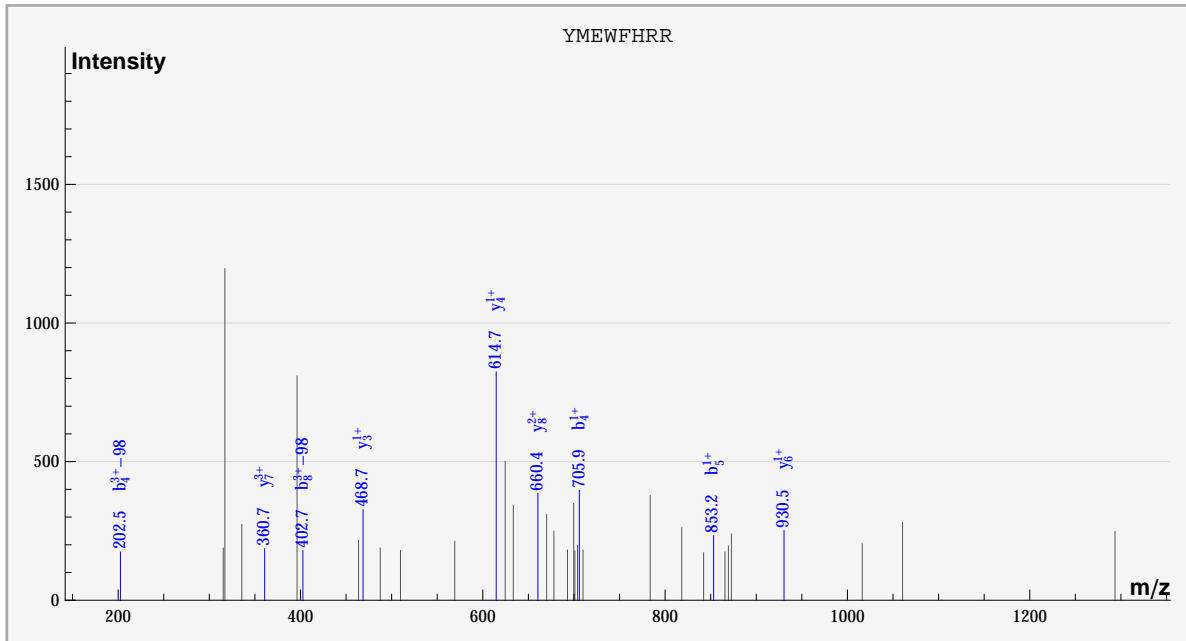

|   | # | b | b* | # | y | y* | P | P* |
|---|---|---|----|---|---|----|---|----|
| Y | 1 |   |    |   |   |    |   | ✓  |
| M | 2 |   |    | 7 | ✓ |    |   |    |
| E | 3 |   |    | 6 | ✓ |    |   |    |
| W | 4 | ✓ | ✓  | 5 |   |    |   |    |
| F | 5 | ✓ |    | 4 | ✓ |    |   |    |
| H | 6 |   |    | 3 | ✓ |    |   |    |
| R | 7 |   |    | 2 |   |    |   |    |
| R | 8 |   | ✓  | 1 |   |    |   |    |

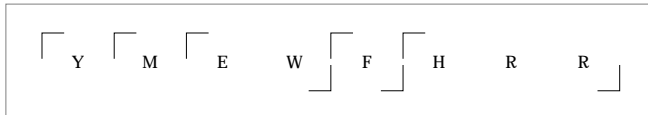

dbValid true YRDYYMKQ PHOS(2) 2. 662. 1.7349 5.04656 100. ? 1614.

S\_Acido\_new%gii68567549|gb|AAy80478.1| YRDYYMKQ%:PHOS:::PHOS:::%sample\_0%cmpd\_341

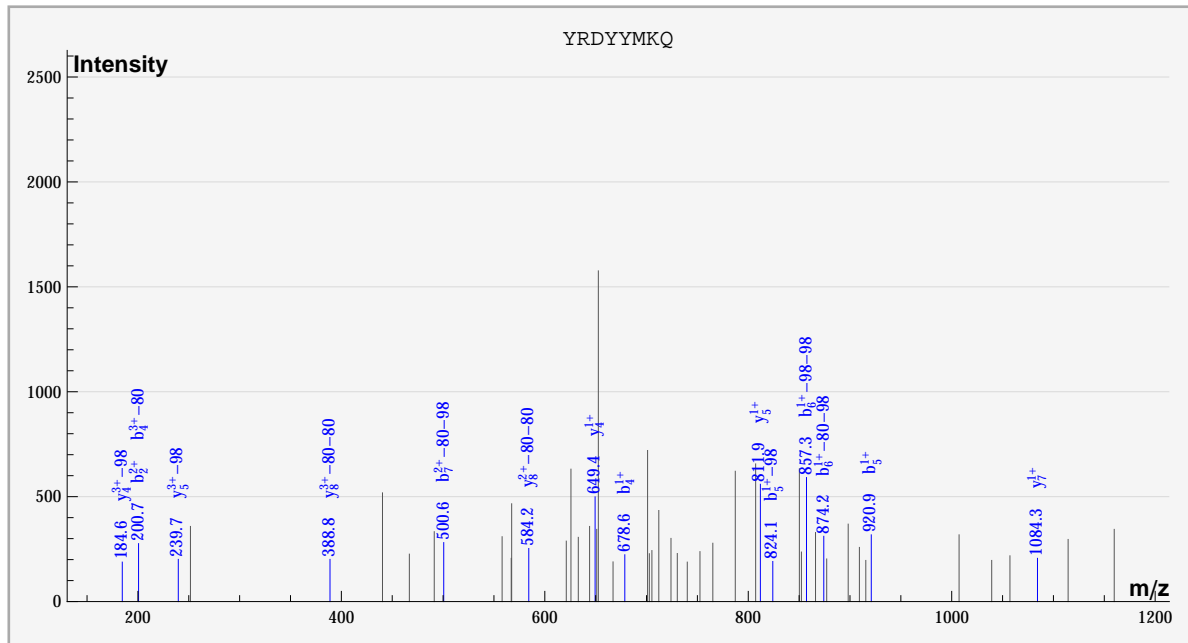

|   | # | b | b* | # | y | y* | P | P* |
|---|---|---|----|---|---|----|---|----|
| Y | 1 |   |    |   |   |    |   | ✓  |
| R | 2 | ✓ |    | 7 | ✓ |    |   |    |
| D | 3 |   |    | 6 |   |    |   |    |
| Y | 4 | ✓ | ✓  | 5 | ✓ | ✓  |   |    |
| Y | 5 | ✓ | ✓  | 4 | ✓ | ✓  |   |    |
| M | 6 |   | ✓  | 3 |   |    |   |    |
| K | 7 |   | ✓  | 2 |   |    |   |    |
| Q | 8 |   |    | 1 |   |    |   |    |

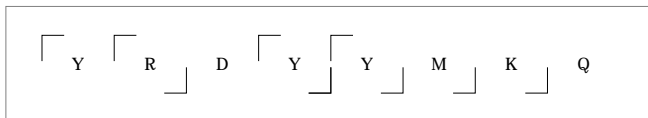



dbValid true KVLSTLLQNTK PHOS(1) 2. 662. 0.865422 4.95946 100. ? 2772.  
 S\_Acido\_new%gi|68568413|gb|AA81342.1| KVLSTLLQNTK%:::PHOS::%sample\_3%compd\_1308

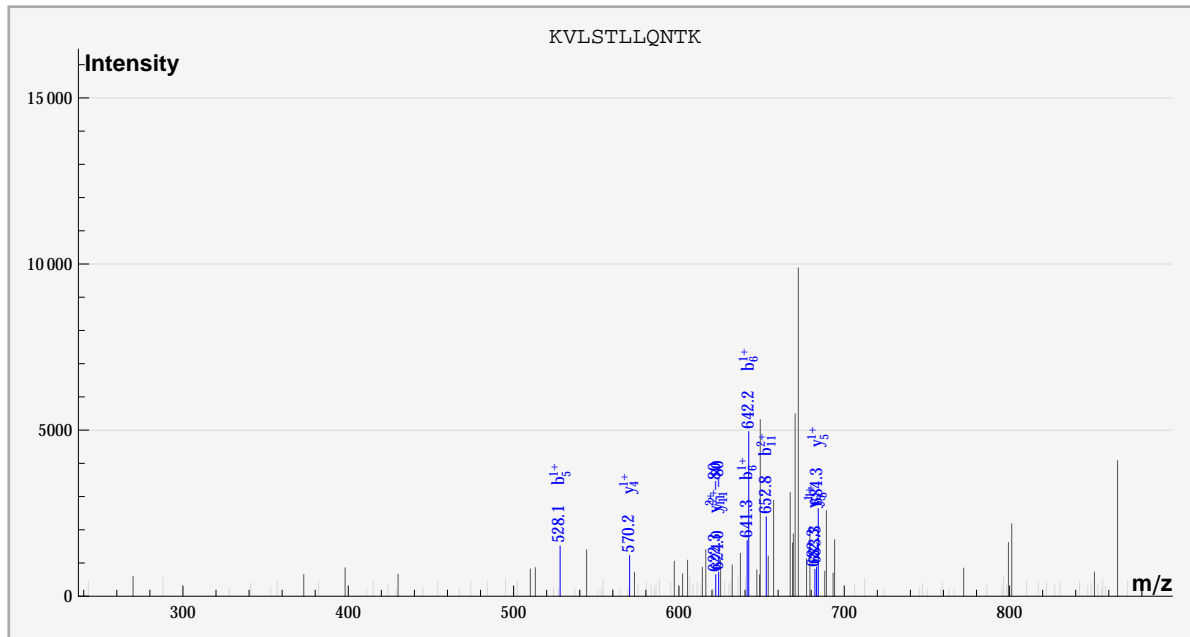

|   | #  | b | b* | #  | y | y* | P | P* |
|---|----|---|----|----|---|----|---|----|
| K | 1  |   |    |    |   |    |   | ✓  |
| V | 2  |   |    | 10 |   |    |   |    |
| L | 3  |   |    | 9  |   |    |   |    |
| S | 4  |   |    | 8  |   |    |   |    |
| T | 5  | ✓ |    | 7  |   |    |   |    |
| L | 6  | ✓ |    | 6  |   |    |   |    |
| L | 7  |   |    | 5  | ✓ |    |   |    |
| Q | 8  |   |    | 4  | ✓ |    |   |    |
| N | 9  |   |    | 3  |   |    |   |    |
| T | 10 |   |    | 2  |   |    |   |    |
| K | 11 | ✓ |    | 1  |   |    |   |    |

┌ K V L S T ┘ ┌ L ┘ ┌ Q N T K ┘

dbValid true DVYDISSKK PHOS(2) 2. 663. 1.28273 5.02366 100. ? 1662.  
 S\_Acido\_new%gi|68568498|gb|AAy81427.1| DVYDISSKK%:::PHOS:::PHOS:::sample\_0%compd\_386

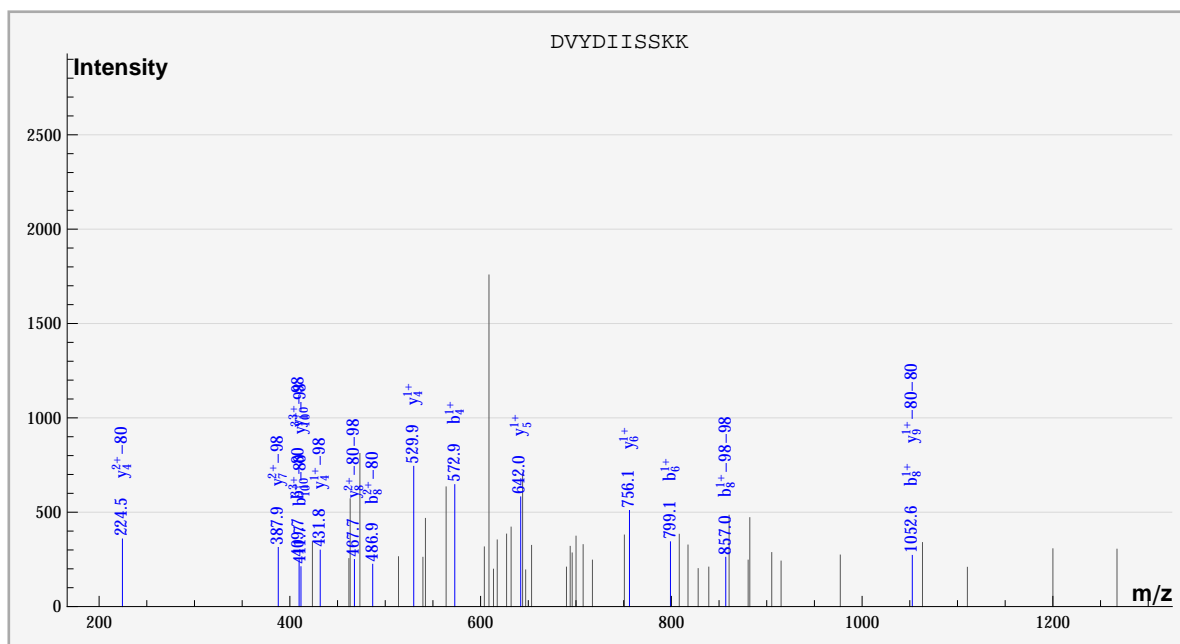

|   | #  | b | b* | # | y | y* | P | P* |
|---|----|---|----|---|---|----|---|----|
| D | 1  |   |    |   |   |    |   | ✓  |
| V | 2  |   |    | 9 |   | ✓  |   |    |
| Y | 3  |   |    | 8 |   | ✓  |   |    |
| D | 4  | ✓ |    | 7 |   | ✓  |   |    |
| I | 5  |   |    | 6 |   | ✓  |   |    |
| I | 6  | ✓ |    | 5 |   | ✓  |   |    |
| S | 7  |   |    | 4 |   | ✓  | ✓ |    |
| S | 8  | ✓ | ✓  | 3 |   |    |   |    |
| K | 9  |   |    | 2 |   |    |   |    |
| K | 10 |   | ✓  | 1 |   |    |   |    |

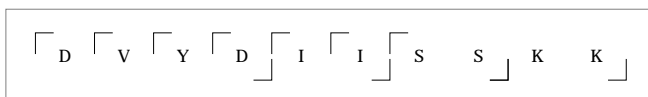

dbValid true KETVSNNK NK PHOS(2) 2. 663. -1.71894 5.16921 100. ? 1902.  
 S\_Acido\_new%gi68566747|gb|AAY79676.1| KETVSNNK NK%::PHOS::PHOS:::sample\_3%compd\_577

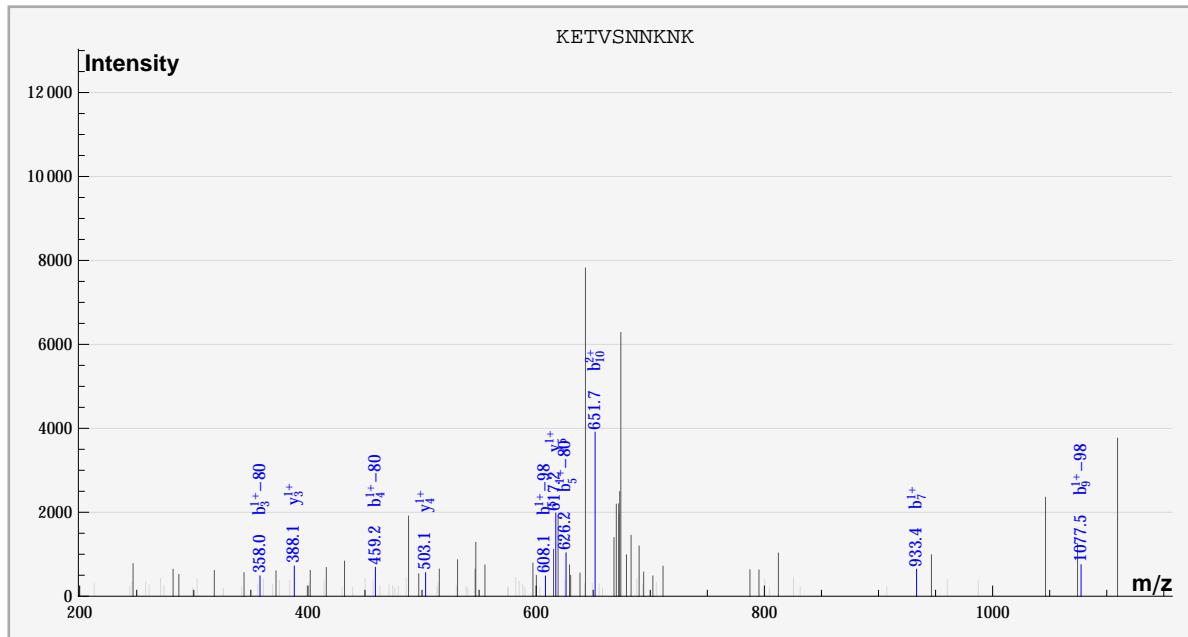

|   | #  | b | b* | # | y | y* | P | P* |
|---|----|---|----|---|---|----|---|----|
| K | 1  |   |    |   |   |    |   |    |
| E | 2  |   |    | 9 |   |    |   |    |
| T | 3  |   | ✓  | 8 |   |    |   |    |
| V | 4  |   | ✓  | 7 |   |    |   |    |
| S | 5  |   | ✓  | 6 |   |    |   |    |
| N | 6  |   |    | 5 |   | ✓  |   |    |
| N | 7  | ✓ |    | 4 |   | ✓  |   |    |
| K | 8  |   |    | 3 |   | ✓  |   |    |
| N | 9  |   | ✓  | 2 |   |    |   |    |
| K | 10 | ✓ |    | 1 |   |    |   |    |

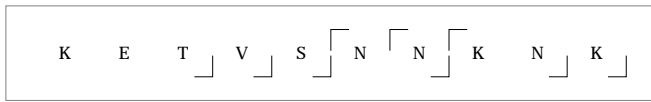



dbValid true YYEAIQLR PHOS(2) 2. 663. 1.78798 5.23414 100. ? 2556.

S\_Acido\_new%gi68567392|gb|AA80321.1| YYEAIQLR%:PHOS:PHOS:.....%sample\_3%cmpd\_1126

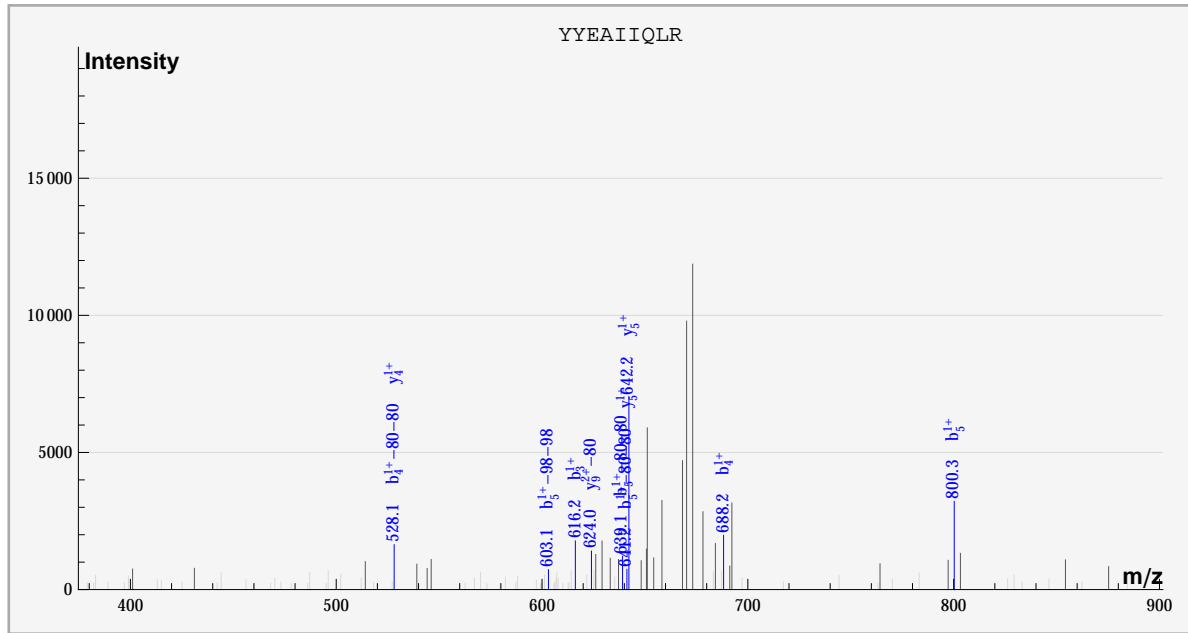

|   | # | b | b* | # | y | y* | P | P* |
|---|---|---|----|---|---|----|---|----|
| Y | 1 |   |    |   |   |    |   | ✓  |
| Y | 2 |   |    | 8 |   |    |   |    |
| E | 3 | ✓ |    | 7 |   |    |   |    |
| A | 4 | ✓ | ✓  | 6 |   |    |   |    |
| I | 5 | ✓ | ✓  | 5 | ✓ |    |   |    |
| I | 6 |   |    | 4 | ✓ |    |   |    |
| Q | 7 |   |    | 3 |   |    |   |    |
| L | 8 |   |    | 2 |   |    |   |    |
| R | 9 |   |    | 1 |   |    |   |    |

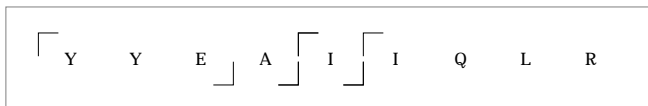

dbValid true GEGYTVVSLSR PHOS(2) 2. 664. 0.270152 5.04318 100. ? 3234.

S\_Acido\_new%gi|68567705|gb|AAy80634.1| GEGYTVVSLSR%:::::::PHOS::PHOS::%sample\_0%compd\_1824

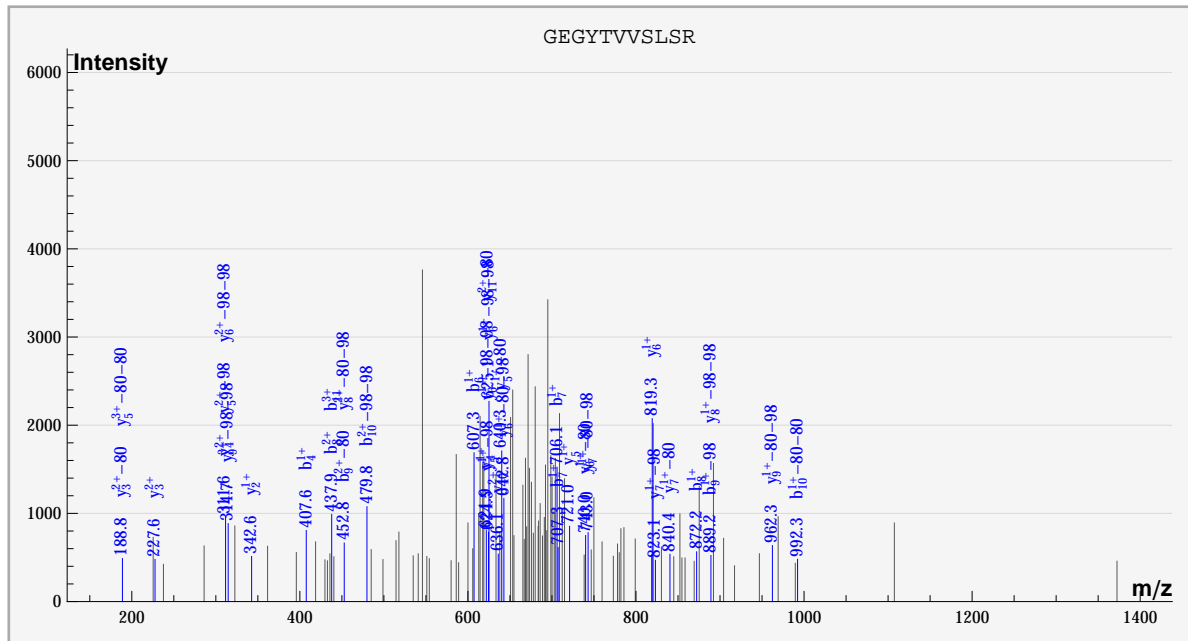

|   | #  | b | b* | #  | y | y* | P | P* |
|---|----|---|----|----|---|----|---|----|
| G | 1  |   |    |    |   |    |   | ✓  |
| E | 2  |   |    | 10 | ✓ |    |   |    |
| G | 3  |   |    | 9  |   | ✓  |   |    |
| Y | 4  | ✓ |    | 8  |   | ✓  |   |    |
| T | 5  |   |    | 7  |   | ✓  |   |    |
| V | 6  | ✓ |    | 6  | ✓ | ✓  |   |    |
| V | 7  | ✓ |    | 5  | ✓ | ✓  |   |    |
| S | 8  | ✓ |    | 4  | ✓ | ✓  |   |    |
| L | 9  |   | ✓  | 3  | ✓ | ✓  |   |    |
| S | 10 |   | ✓  | 2  | ✓ |    |   |    |
| R | 11 | ✓ |    | 1  |   |    |   |    |

[ G [ E [ G [ Y [ T [ V [ V [ S [ L [ S [ R ]

dbValid true GVWAHEVGFSR PHOS(1) 2. 664. -1.20468 5.2032 100. ? 3660.

S\_Acido\_new%gi|68568420|gb|AAy81349.1| GVWAHEVGFSR%:::PHOS::%sample\_0%cmpd\_2210

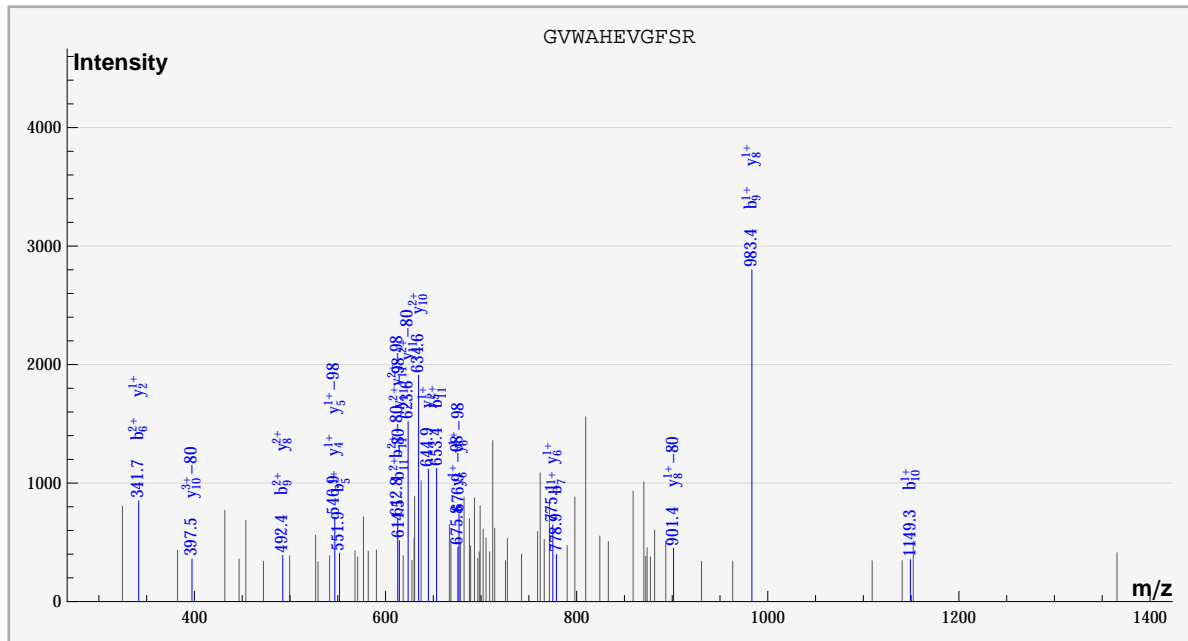

|   | #  | b | b* | #  | y | y* | P | P* |
|---|----|---|----|----|---|----|---|----|
| G | 1  |   |    |    |   |    |   | ✓  |
| V | 2  |   |    | 10 | ✓ | ✓  |   |    |
| W | 3  |   |    | 9  |   |    |   |    |
| A | 4  |   |    | 8  | ✓ | ✓  |   |    |
| H | 5  | ✓ |    | 7  |   |    |   |    |
| E | 6  | ✓ |    | 6  | ✓ | ✓  |   |    |
| V | 7  | ✓ |    | 5  | ✓ | ✓  |   |    |
| G | 8  |   |    | 4  | ✓ |    |   |    |
| F | 9  | ✓ |    | 3  |   |    |   |    |
| S | 10 | ✓ |    | 2  | ✓ |    |   |    |
| R | 11 | ✓ | ✓  | 1  |   |    |   |    |

G V W A H E V G F S R

dbValid true IYMKYCDR Cys\_CAM(1),Oxidation\_M(1),PHOS(2) 2. 664. -1.27125 5.12568 100. ? 402.  
 S\_Acido\_new%gil68566621|gb|AAY79550.1| IYMKYCDR%::PHOS:Oxidation\_M::PHOS:Cys\_CAM::%sample\_0%compd\_2470

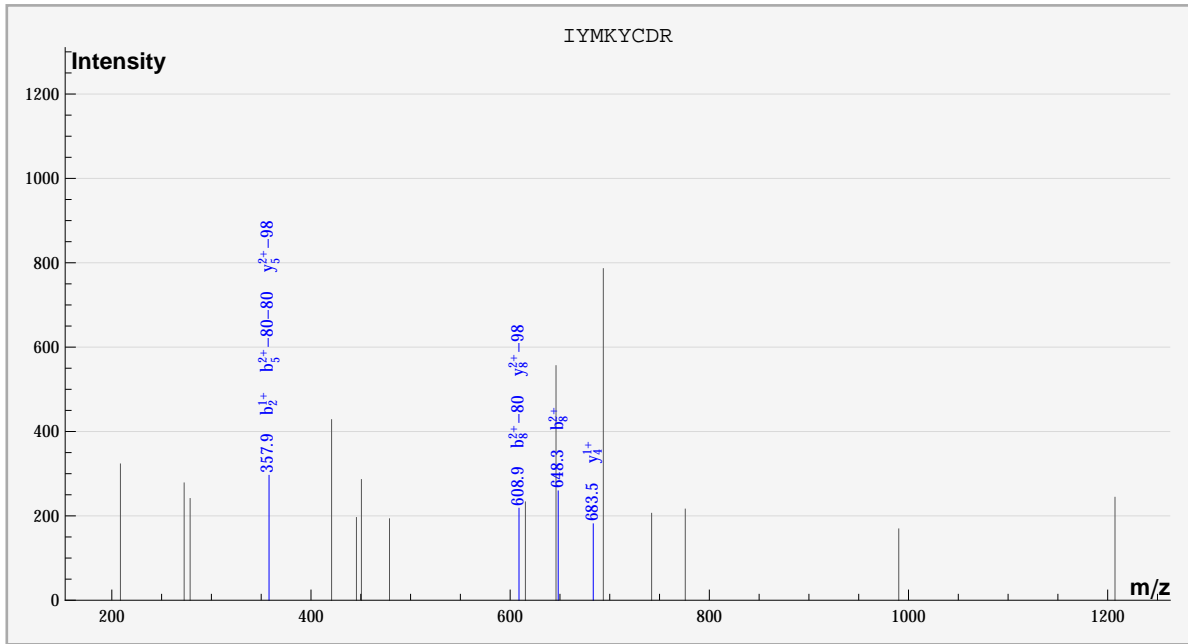

|   | # | b | b* | # | y | y* | P | P* |
|---|---|---|----|---|---|----|---|----|
| I | 1 |   |    |   |   |    |   | ✓  |
| Y | 2 | ✓ |    | 7 |   |    |   |    |
| M | 3 |   |    | 6 |   |    |   |    |
| K | 4 |   |    | 5 |   | ✓  |   |    |
| Y | 5 |   | ✓  | 4 | ✓ |    |   |    |
| C | 6 |   |    | 3 |   |    |   |    |
| D | 7 |   |    | 2 |   |    |   |    |
| R | 8 | ✓ | ✓  | 1 |   |    |   |    |

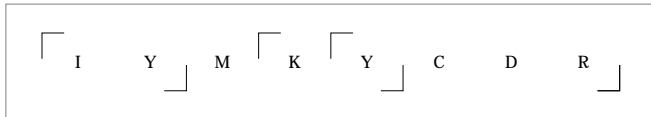



dbValid true RIRSSNGTLNK PHOS(1) 2. 665. -1.6621 4.94187 100. ? 2376.  
 S\_Acido\_new%gi|68568025|gb|AA80954.1| RIRSSNGTLNK%:::PHOS:::sample\_0%compd\_1039

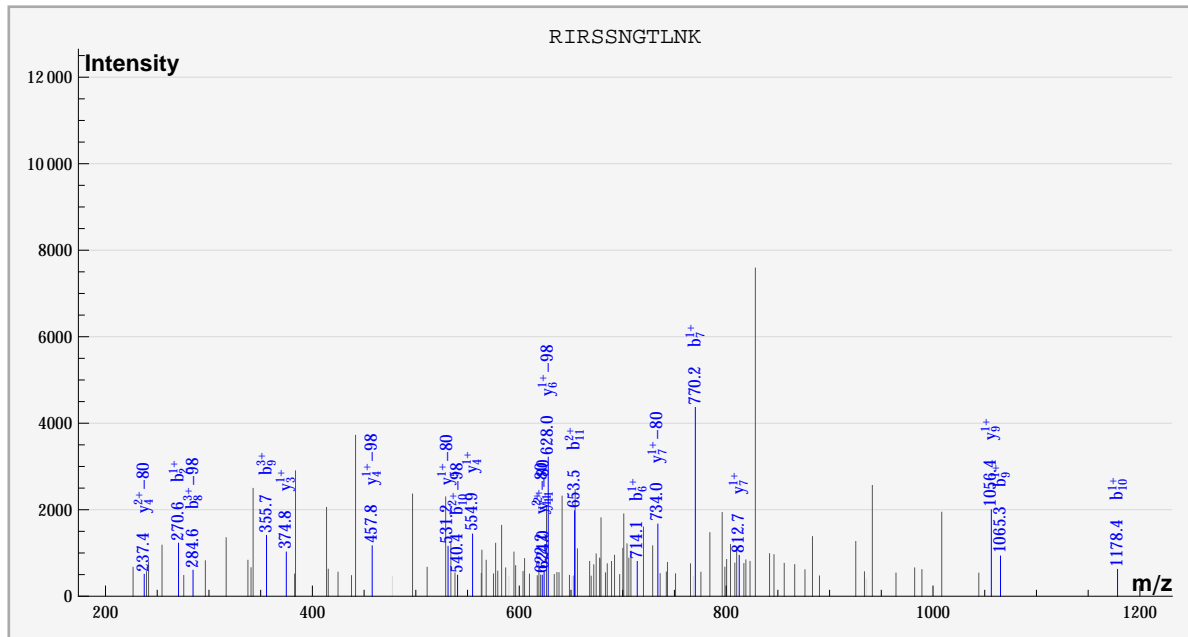

|   | #  | b | b* | #  | y | y* | P | P* |
|---|----|---|----|----|---|----|---|----|
| R | 1  |   |    |    |   |    |   | ✓  |
| I | 2  | ✓ |    | 10 |   |    |   |    |
| R | 3  |   |    | 9  | ✓ |    |   |    |
| S | 4  |   |    | 8  |   |    |   |    |
| S | 5  |   |    | 7  | ✓ | ✓  |   |    |
| N | 6  | ✓ |    | 6  |   | ✓  |   |    |
| G | 7  | ✓ |    | 5  |   | ✓  |   |    |
| T | 8  |   | ✓  | 4  | ✓ | ✓  |   |    |
| L | 9  | ✓ |    | 3  | ✓ |    |   |    |
| N | 10 | ✓ | ✓  | 2  |   |    |   |    |
| K | 11 | ✓ |    | 1  |   |    |   |    |

R I R S S N G T L N K

dbValid true RGLDALGVEYR PHOS(1) 2. 665. -0.178463 5.27653 100. ? 2508.  
 S\_Acido\_new%gi|68566912|gb|AA79841.1| RGLDALGVEYR%:.....PHOS::%sample\_0%cmpd\_1161

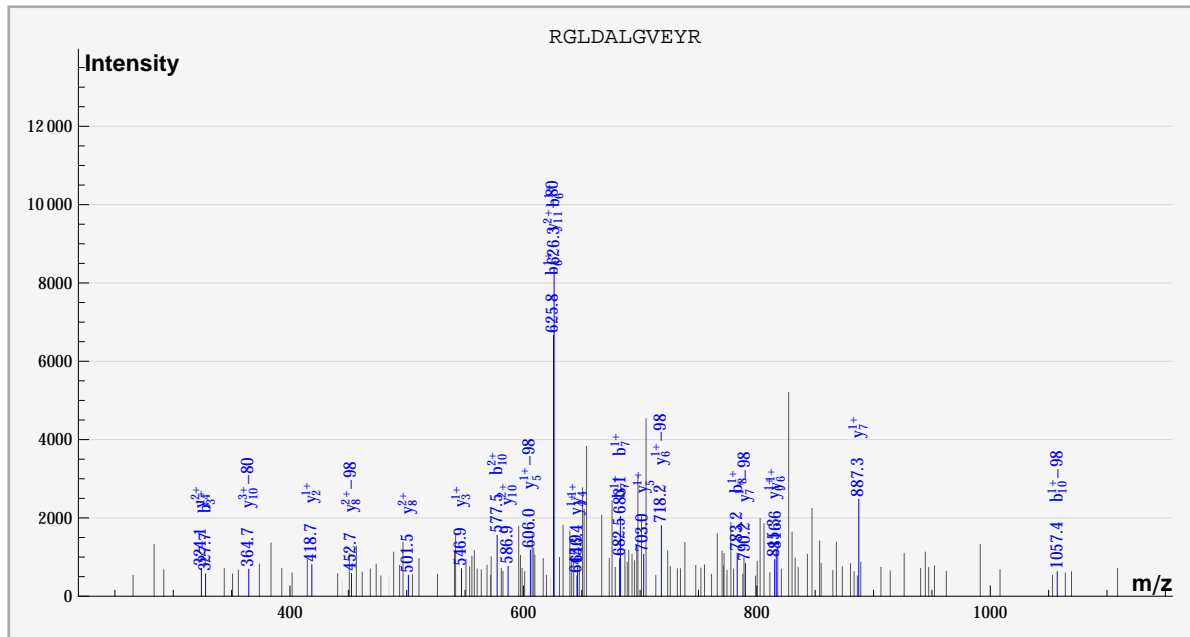

|   | #  | b | b* | #  | y | y* | P | P* |
|---|----|---|----|----|---|----|---|----|
| R | 1  |   |    |    |   |    |   | ✓  |
| G | 2  |   |    | 10 | ✓ | ✓  |   |    |
| L | 3  | ✓ |    | 9  |   |    |   |    |
| D | 4  |   |    | 8  | ✓ | ✓  |   |    |
| A | 5  |   |    | 7  | ✓ | ✓  |   |    |
| L | 6  | ✓ |    | 6  | ✓ | ✓  |   |    |
| G | 7  | ✓ |    | 5  | ✓ | ✓  |   |    |
| V | 8  | ✓ |    | 4  | ✓ |    |   |    |
| E | 9  |   |    | 3  | ✓ |    |   |    |
| Y | 10 | ✓ | ✓  | 2  | ✓ |    |   |    |
| R | 11 |   |    | 1  |   |    |   |    |

[ R ] [ G ] [ L ] [ D ] [ A ] [ L ] [ G ] [ V ] [ E ] [ Y ] R

dbValid true FVSKSVALPAVK PHOS(1) 2. 665. -1.63495 5.56645 100. ? 3648.  
 S\_Acido\_new%gi|68567852|gb|AAV80781.1| FVSKSVALPAVK%:::PHOS:::sample\_0%compd\_2201

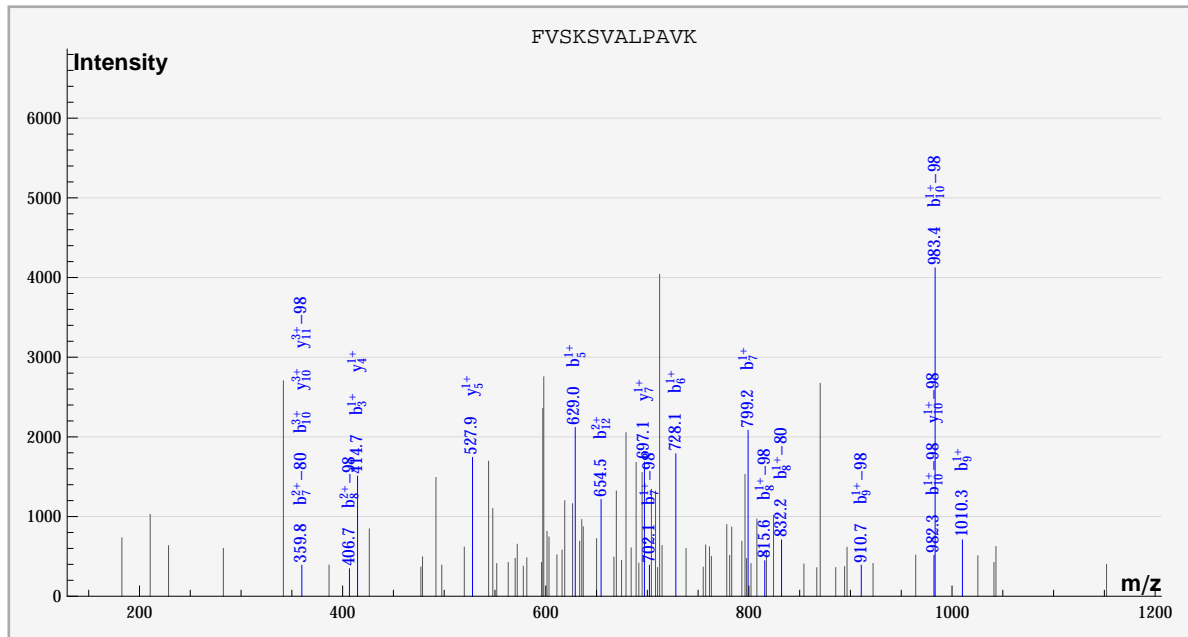

|   | #  | b | b* | #  | y | y* | P | P* |
|---|----|---|----|----|---|----|---|----|
| F | 1  |   |    |    |   |    |   |    |
| V | 2  |   |    | 11 |   | ✓  |   |    |
| S | 3  | ✓ |    | 10 | ✓ | ✓  |   |    |
| K | 4  |   |    | 9  |   |    |   |    |
| S | 5  | ✓ |    | 8  |   |    |   |    |
| V | 6  | ✓ |    | 7  | ✓ |    |   |    |
| A | 7  | ✓ | ✓  | 6  |   |    |   |    |
| L | 8  |   | ✓  | 5  | ✓ |    |   |    |
| P | 9  | ✓ | ✓  | 4  | ✓ |    |   |    |
| A | 10 | ✓ | ✓  | 3  |   |    |   |    |
| V | 11 |   |    | 2  |   |    |   |    |
| K | 12 | ✓ |    | 1  |   |    |   |    |

F V S K S V A L P A V K



dbValid true VVWLSEEEKK PHOS(1) 2. 665.14 -1.31933 5.03533 100. ? 2016.  
 S\_Acido\_new%gi|68566862|gb|AAY79791.1| VVWLSEEEKK%::::PHOS::::%sample\_1%cmpd\_680

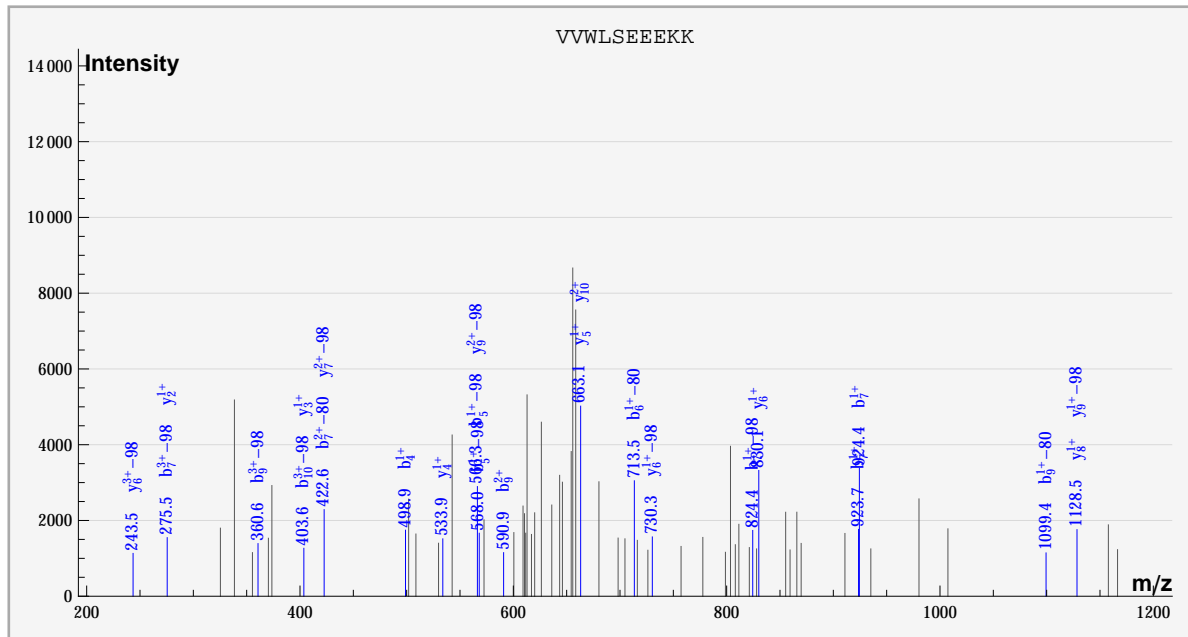

|   | #  | b | b* | # | y | y* | P | P* |
|---|----|---|----|---|---|----|---|----|
| V | 1  |   |    |   |   |    | ✓ |    |
| V | 2  |   |    | 9 |   | ✓  |   |    |
| W | 3  |   |    | 8 | ✓ |    |   |    |
| L | 4  | ✓ |    | 7 |   | ✓  |   |    |
| S | 5  |   | ✓  | 6 | ✓ | ✓  |   |    |
| E | 6  |   | ✓  | 5 | ✓ |    |   |    |
| E | 7  | ✓ | ✓  | 4 | ✓ |    |   |    |
| E | 8  |   |    | 3 | ✓ |    |   |    |
| K | 9  | ✓ | ✓  | 2 | ✓ |    |   |    |
| K | 10 |   | ✓  | 1 |   |    |   |    |

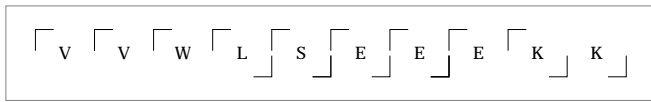

dbValid true KENEKALEYK PHOS(1) 2. 666. 0.315757 5.03754 100. ? 2730.  
 S\_Acido\_new%gii68567153|gb|AAY80082.1| KENEKALEYK%:.....PHOS::%sample\_2%compd\_1285

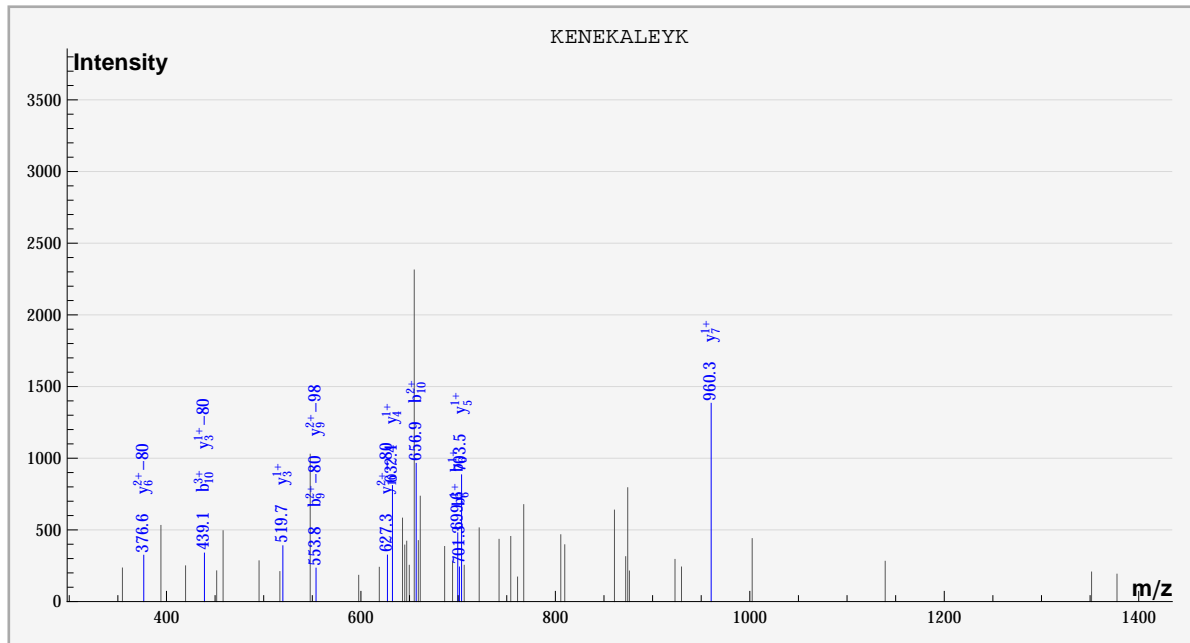

|   | #  | b | b* | # | y | y* | P | P* |
|---|----|---|----|---|---|----|---|----|
| K | 1  |   |    |   |   |    |   | ✓  |
| E | 2  |   |    | 9 |   | ✓  |   |    |
| N | 3  |   |    | 8 |   |    |   |    |
| E | 4  |   |    | 7 | ✓ |    |   |    |
| K | 5  |   |    | 6 |   | ✓  |   |    |
| A | 6  | ✓ |    | 5 | ✓ |    |   |    |
| L | 7  |   |    | 4 | ✓ |    |   |    |
| E | 8  |   |    | 3 | ✓ | ✓  |   |    |
| Y | 9  |   | ✓  | 2 |   |    |   |    |
| K | 10 | ✓ |    | 1 |   |    |   |    |

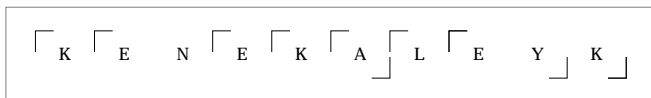

dbValid true YNDAMNIVRR PHOS(1) 2. 668. -1.70007 5.02851 100. ? 2340.  
 S\_Acido\_new%gi|68566710|gb|AAY79639.1| YNDAMNIVRR%:PHOS:.....:sample\_3%cpd\_948

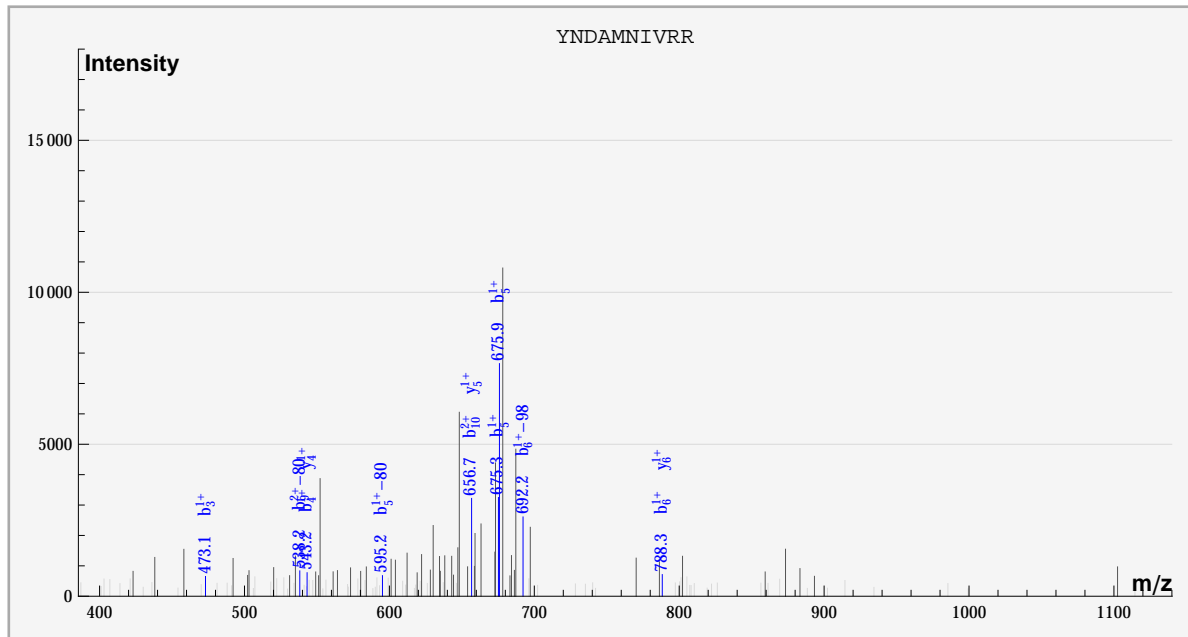

|   | #  | b | b* | # | y | y* | P | P* |
|---|----|---|----|---|---|----|---|----|
| Y | 1  |   |    |   |   |    |   |    |
| N | 2  |   |    | 9 |   |    |   |    |
| D | 3  | ✓ |    | 8 |   |    |   |    |
| A | 4  | ✓ |    | 7 |   |    |   |    |
| M | 5  | ✓ | ✓  | 6 | ✓ |    |   |    |
| N | 6  | ✓ | ✓  | 5 | ✓ |    |   |    |
| I | 7  |   |    | 4 | ✓ |    |   |    |
| V | 8  |   |    | 3 |   |    |   |    |
| R | 9  |   | ✓  | 2 |   |    |   |    |
| R | 10 | ✓ |    | 1 |   |    |   |    |

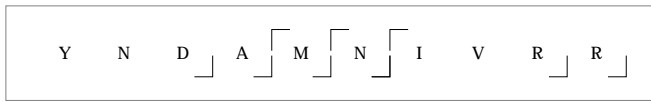

dbValid true VYDSIEYLQK PHOS(1) 2. 668. 1.30486 5.14505 100. ? 3054.  
 S\_Acido\_new%gil68568630|gb|AAy81559.1| VYDSIEYLQK%::PHOS:::sample\_2%compd\_1564

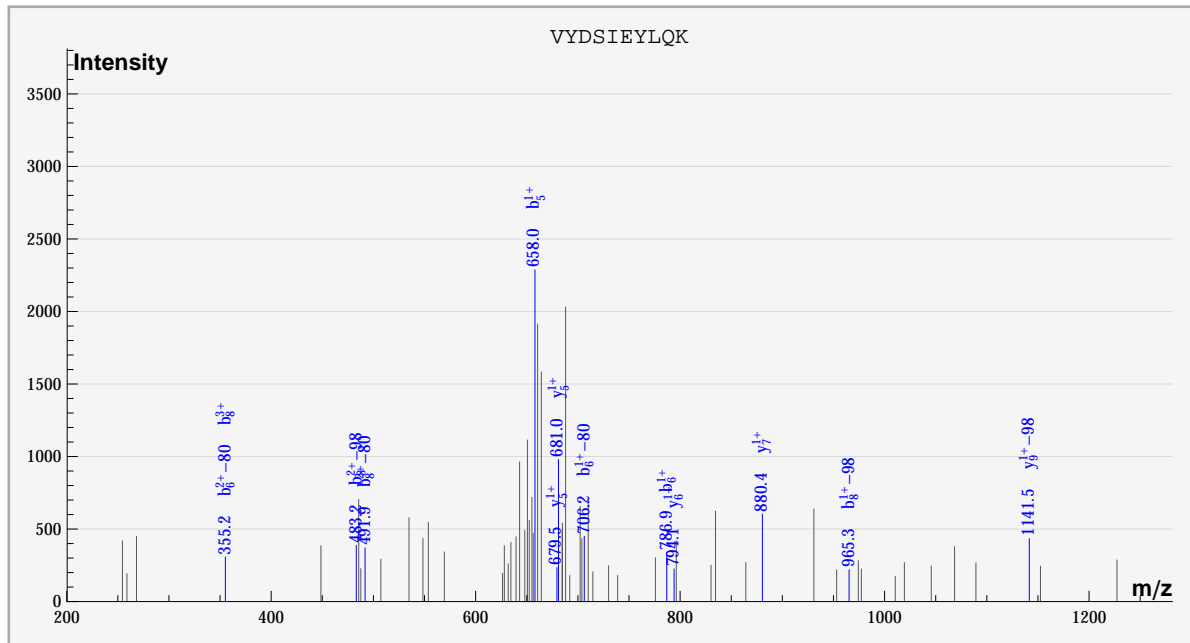

|   | #  | b | b* | # | y | y* | P | P* |
|---|----|---|----|---|---|----|---|----|
| V | 1  |   |    |   |   |    |   |    |
| Y | 2  |   |    | 9 |   | ✓  |   |    |
| D | 3  |   |    | 8 |   |    |   |    |
| S | 4  |   |    | 7 |   | ✓  |   |    |
| I | 5  | ✓ |    | 6 |   | ✓  |   |    |
| E | 6  | ✓ | ✓  | 5 |   | ✓  |   |    |
| Y | 7  |   |    | 4 |   |    |   |    |
| L | 8  | ✓ | ✓  | 3 |   |    |   |    |
| Q | 9  |   |    | 2 |   |    |   |    |
| K | 10 |   |    | 1 |   |    |   |    |

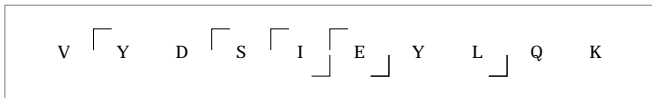



dbValid true KLTYHDLYK PHOS(2) 2. 669. 1.78798 4.9251 100. ? 2208.

S\_Acido\_new%gi|68566793|gb|AAy79722.1| KLTYHDLYK%:::PHOS:PHOS:::sample\_3%compd\_838

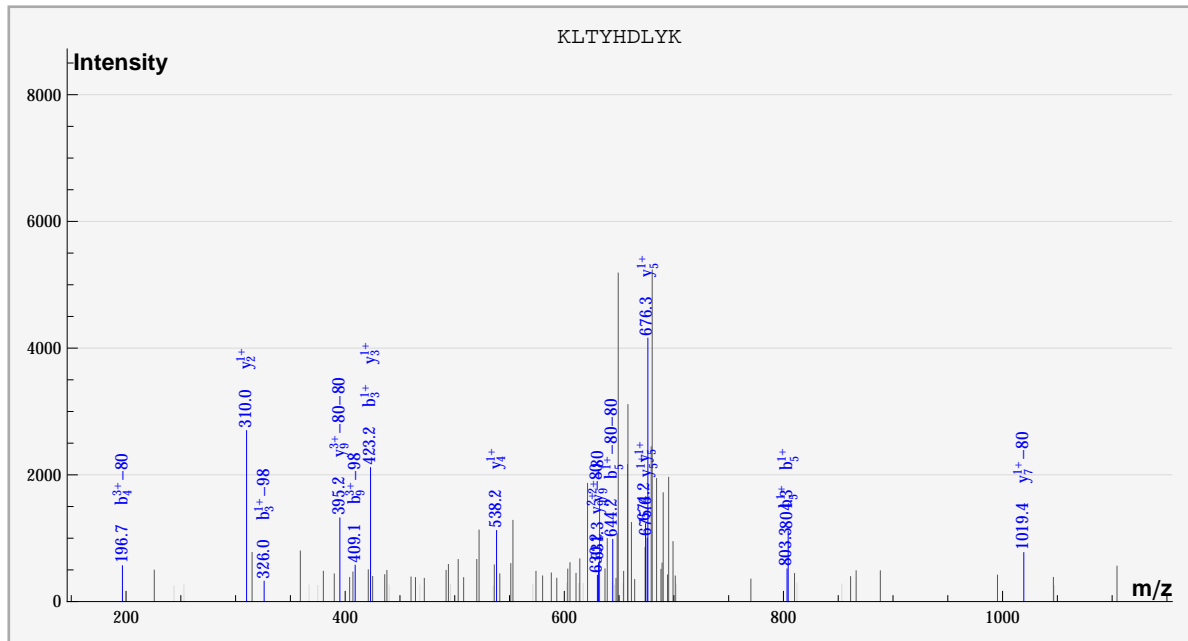

|   | # | b | b* | # | y | y* | P | P* |
|---|---|---|----|---|---|----|---|----|
| K | 1 |   |    |   |   |    |   | ✓  |
| L | 2 |   |    | 8 |   |    |   |    |
| T | 3 | ✓ | ✓  | 7 |   | ✓  |   |    |
| Y | 4 |   | ✓  | 6 |   |    |   |    |
| H | 5 | ✓ | ✓  | 5 |   | ✓  |   |    |
| D | 6 |   |    | 4 |   | ✓  |   |    |
| L | 7 |   |    | 3 |   | ✓  |   |    |
| Y | 8 |   |    | 2 |   | ✓  |   |    |
| K | 9 |   | ✓  | 1 |   |    |   |    |

┌ K L T Y H D L Y K ┐

dbValid true KLT YHDLYK PHOS(2) 2. 669. 1.78798 5.04828 100. ? 2256.  
 S\_Acido\_new%gi|68566793|gb|AA Y79722.1| KLT YHDLYK%:::PHOS:PHOS:::sample\_3%cmpd\_878

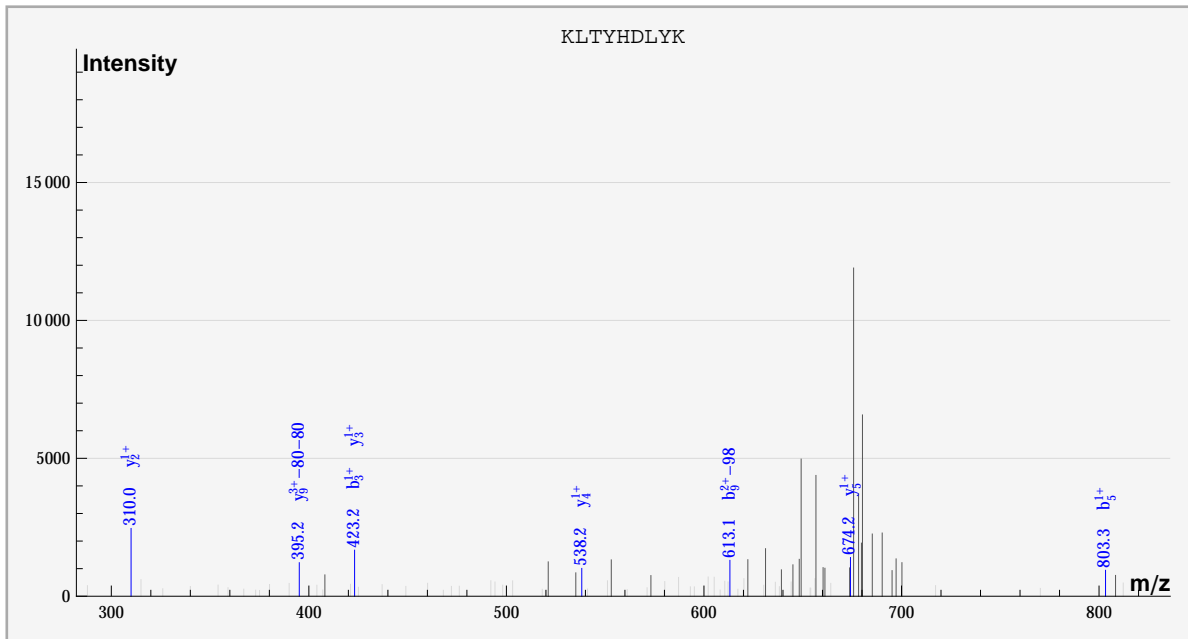

|   | # | b | b* | # | y | y* | P | P* |
|---|---|---|----|---|---|----|---|----|
| K | 1 |   |    |   |   |    |   | ✓  |
| L | 2 |   |    | 8 |   |    |   |    |
| T | 3 | ✓ |    | 7 |   |    |   |    |
| Y | 4 |   |    | 6 |   |    |   |    |
| H | 5 | ✓ |    | 5 | ✓ |    |   |    |
| D | 6 |   |    | 4 | ✓ |    |   |    |
| L | 7 |   |    | 3 | ✓ |    |   |    |
| Y | 8 |   |    | 2 | ✓ |    |   |    |
| K | 9 |   | ✓  | 1 |   |    |   |    |

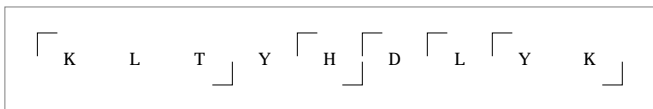

dbValid true DYREALARIR PHOS(1) 2. 670. 1.83498 5.22757 100. ? 2730.

S\_Acido\_new%gi|68567654|gb|AAY80583.1| DYREALARIR%::PHOS:::sample\_0%compd\_1352

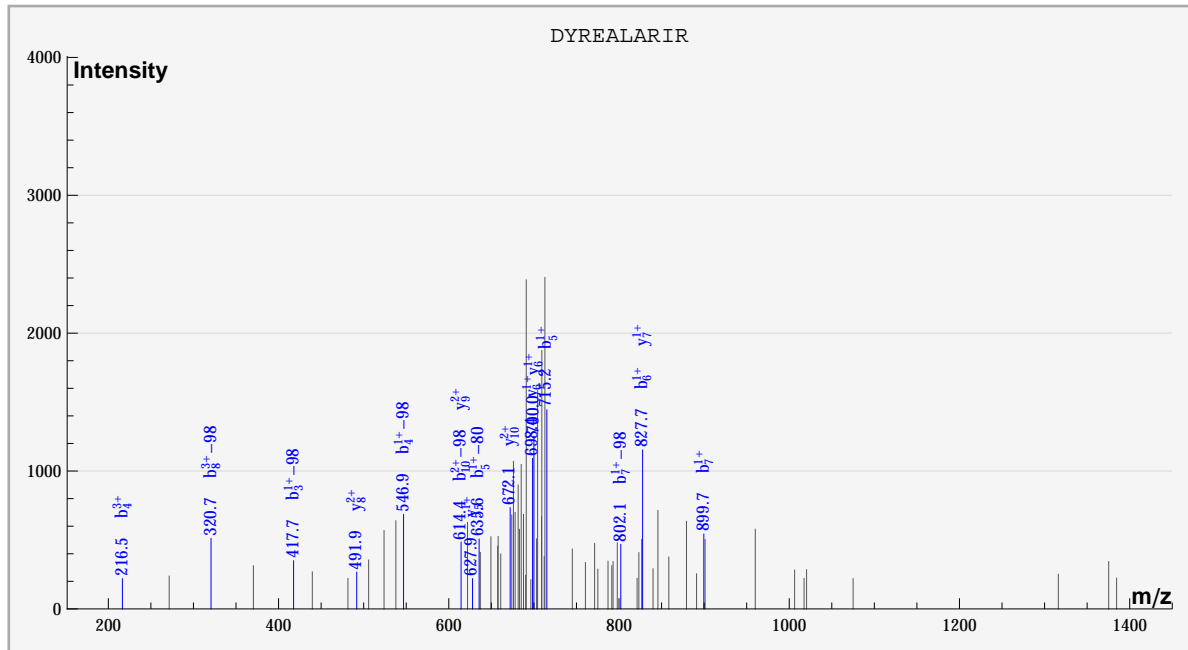

|   | #  | b | b* | # | y | y* | P | P* |
|---|----|---|----|---|---|----|---|----|
| D | 1  |   |    |   |   |    |   | ✓  |
| Y | 2  |   |    | 9 |   | ✓  |   |    |
| R | 3  |   | ✓  | 8 |   | ✓  |   |    |
| E | 4  | ✓ | ✓  | 7 |   | ✓  |   |    |
| A | 5  | ✓ | ✓  | 6 |   | ✓  |   |    |
| L | 6  | ✓ |    | 5 |   | ✓  |   |    |
| A | 7  | ✓ | ✓  | 4 |   |    |   |    |
| R | 8  |   | ✓  | 3 |   |    |   |    |
| I | 9  |   |    | 2 |   |    |   |    |
| R | 10 |   | ✓  | 1 |   |    |   |    |

D Y R E A L A R I R

dbValid true LWEEFEDYK PHOS(1) 2. 671. -1.23189 5.88494 100. ? 1806.  
 S\_Acido\_new%gi|68567492|gb|AAY80421.1| LWEEFEDYK%::::::PHOS::%sample\_0%compd\_513

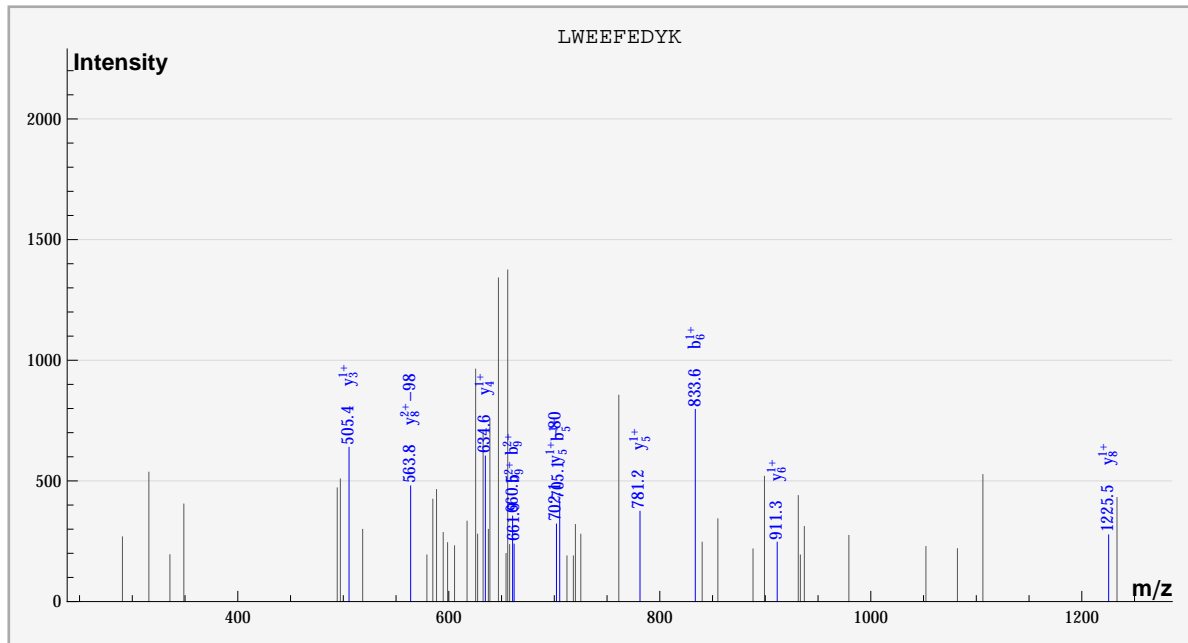

|   | # | b | b* | # | y | y* | P | P* |
|---|---|---|----|---|---|----|---|----|
| L | 1 |   |    |   |   |    |   |    |
| W | 2 |   |    | 8 | ✓ | ✓  |   |    |
| E | 3 |   |    | 7 |   |    |   |    |
| E | 4 |   |    | 6 | ✓ |    |   |    |
| F | 5 | ✓ |    | 5 | ✓ | ✓  |   |    |
| E | 6 | ✓ |    | 4 | ✓ |    |   |    |
| D | 7 |   |    | 3 | ✓ |    |   |    |
| Y | 8 |   |    | 2 |   |    |   |    |
| K | 9 | ✓ |    | 1 |   |    |   |    |

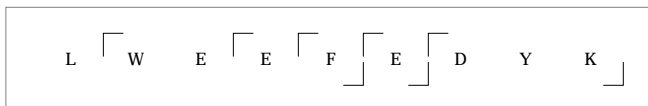

dbValid true KLT YHDLYK PHOS(2) 2. 671. -0.212018 5.39818 100. ? 2346.  
 S\_Acido\_new%gi|68566793|gb|AA79722.1| KLT YHDLYK%:::PHOS:PHOS:::sample\_0%compd\_957

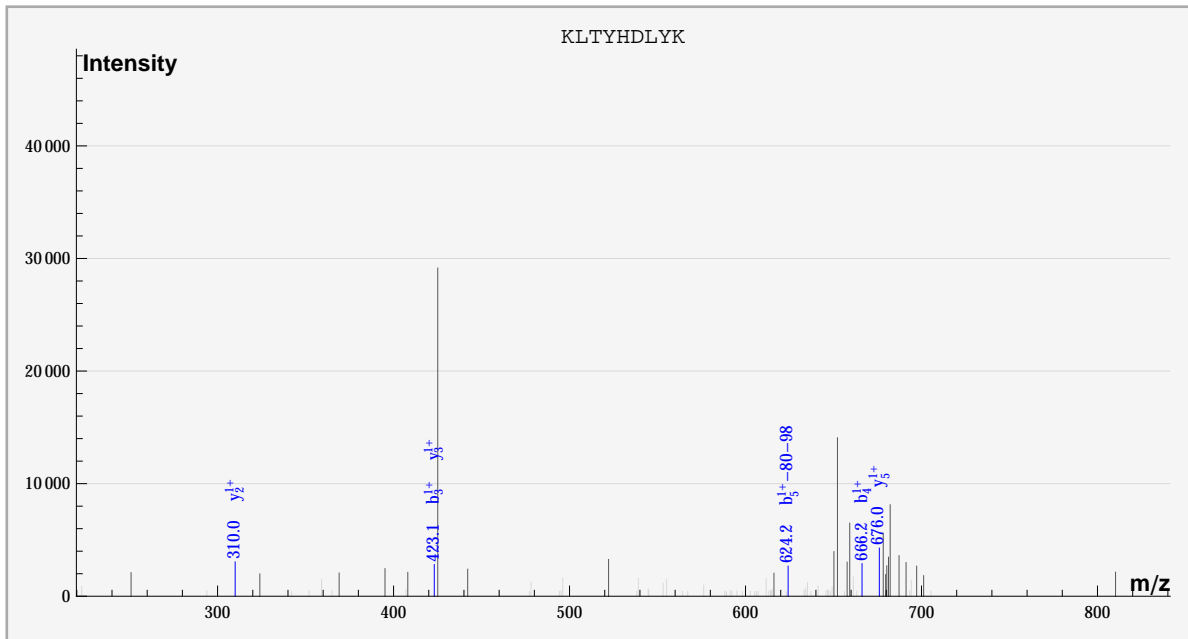

|   | # | b | b* | # | y | y* | P | P* |
|---|---|---|----|---|---|----|---|----|
| K | 1 |   |    |   |   |    |   |    |
| L | 2 |   |    | 8 |   |    |   |    |
| T | 3 | ✓ |    | 7 |   |    |   |    |
| Y | 4 | ✓ |    | 6 |   |    |   |    |
| H | 5 |   | ✓  | 5 | ✓ |    |   |    |
| D | 6 |   |    | 4 |   |    |   |    |
| L | 7 |   |    | 3 | ✓ |    |   |    |
| Y | 8 |   |    | 2 | ✓ |    |   |    |
| K | 9 |   |    | 1 |   |    |   |    |

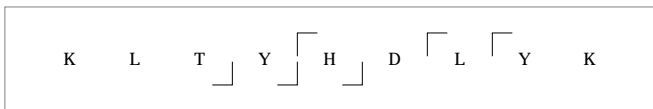

dbValid true KTILDLVGYK PHOS(1) 2. 671. 0.872707 5.15447 100. ? 2556.  
 S\_Acido\_new%gil68567257|gb|AAY80186.1| KTILDLVGYK%::PHOS:::sample\_0%compd\_1144

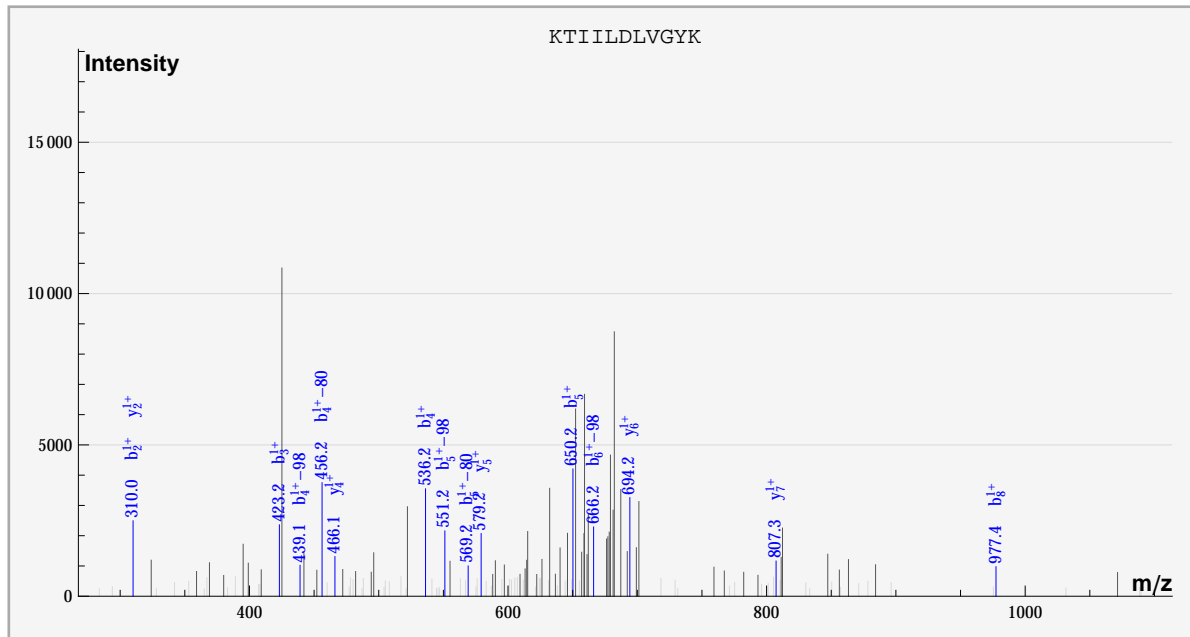

|   | #  | b | b* | #  | y | y* | P | P* |
|---|----|---|----|----|---|----|---|----|
| K | 1  |   |    |    |   |    |   |    |
| T | 2  | ✓ |    | 10 |   |    |   |    |
| I | 3  | ✓ |    | 9  |   |    |   |    |
| I | 4  | ✓ | ✓  | 8  |   |    |   |    |
| L | 5  | ✓ | ✓  | 7  | ✓ |    |   |    |
| D | 6  |   | ✓  | 6  | ✓ |    |   |    |
| L | 7  |   |    | 5  | ✓ |    |   |    |
| V | 8  | ✓ |    | 4  | ✓ |    |   |    |
| G | 9  |   |    | 3  |   |    |   |    |
| Y | 10 |   |    | 2  | ✓ |    |   |    |
| K | 11 |   |    | 1  |   |    |   |    |

K T I I L D L V G Y K

dbValid true KTILDLVGYK PHOS(1) 2. 671. 0.872707 5.25437 100. ? 2586.  
 S\_Acido\_new%gil68567257|gb|AAy80186.1| KTILDLVGYK%::PHOS:::sample\_0%cmpd\_1165

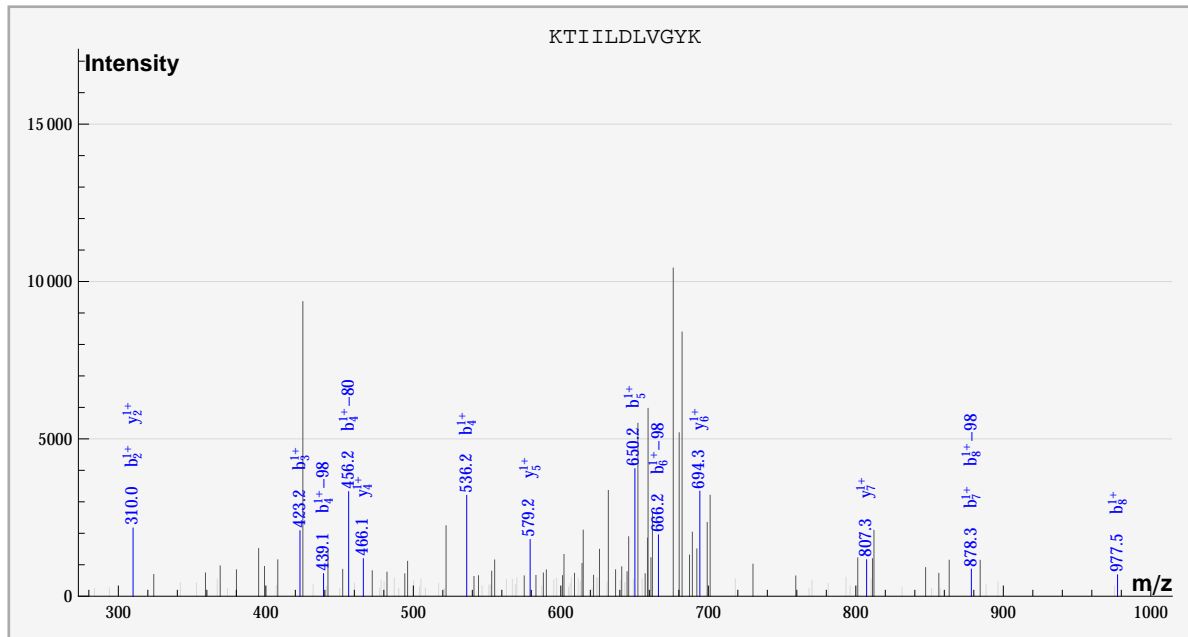

|   | #  | b | b* | #  | y | y* | P | P* |
|---|----|---|----|----|---|----|---|----|
| K | 1  |   |    |    |   |    |   |    |
| T | 2  | ✓ |    | 10 |   |    |   |    |
| I | 3  | ✓ |    | 9  |   |    |   |    |
| I | 4  | ✓ | ✓  | 8  |   |    |   |    |
| L | 5  | ✓ |    | 7  | ✓ |    |   |    |
| D | 6  |   | ✓  | 6  | ✓ |    |   |    |
| L | 7  | ✓ |    | 5  | ✓ |    |   |    |
| V | 8  | ✓ | ✓  | 4  | ✓ |    |   |    |
| G | 9  |   |    | 3  |   |    |   |    |
| Y | 10 |   |    | 2  | ✓ |    |   |    |
| K | 11 |   |    | 1  |   |    |   |    |

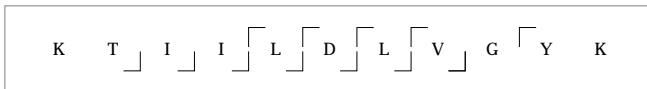

dbValid true KTIIIDLVGYK PHOS(1) 2. 671. 0.872707 5.41288 100. ? 2598.  
 S\_Acido\_new%gil68567257|gb|AAY80186.1| KTIIIDLVGYK%::PHOS:::sample\_0%compd\_1175

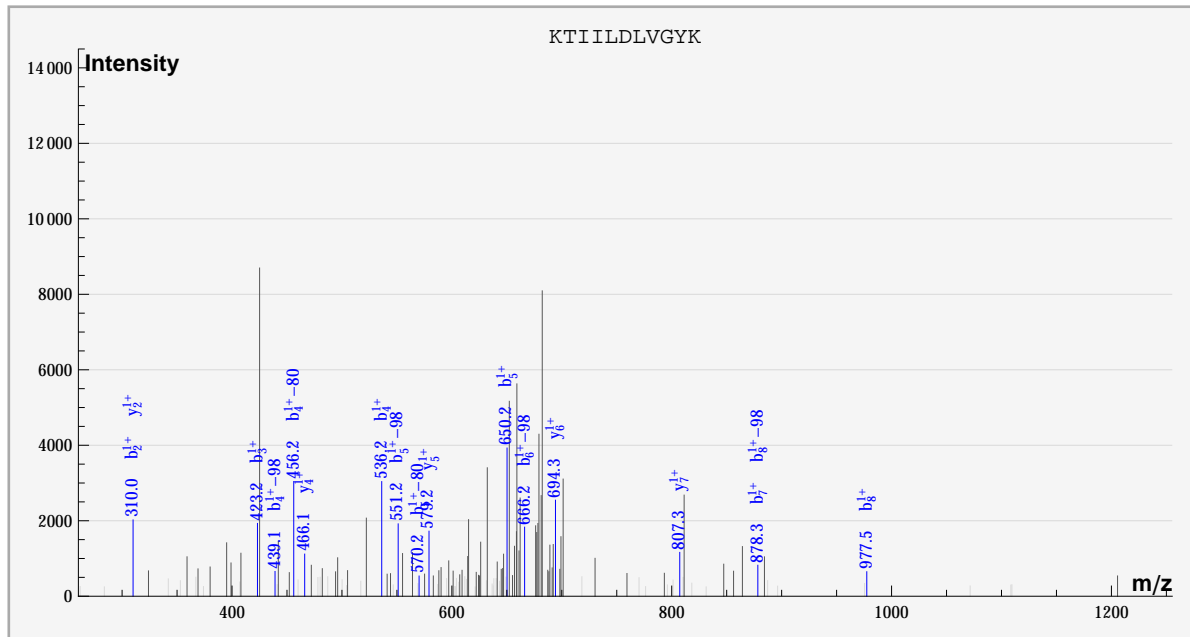

|   | #  | b | b* | #  | y | y* | P | P* |
|---|----|---|----|----|---|----|---|----|
| K | 1  |   |    |    |   |    |   |    |
| T | 2  | ✓ |    | 10 |   |    |   |    |
| I | 3  | ✓ |    | 9  |   |    |   |    |
| I | 4  | ✓ | ✓  | 8  |   |    |   |    |
| L | 5  | ✓ | ✓  | 7  | ✓ |    |   |    |
| D | 6  |   | ✓  | 6  | ✓ |    |   |    |
| L | 7  | ✓ |    | 5  | ✓ |    |   |    |
| V | 8  | ✓ | ✓  | 4  | ✓ |    |   |    |
| G | 9  |   |    | 3  |   |    |   |    |
| Y | 10 |   |    | 2  | ✓ |    |   |    |
| K | 11 |   |    | 1  |   |    |   |    |

K T I I L D L V G Y K



dbValid true KTIIIDLVLGYK PHOS(1) 2. 671. 0.872707 5.84899 100. ? 2676.  
 S\_Acido\_new%gi|68567257|gb|AAV80186.1| KTIIIDLVLGYK%::PHOS:::sample\_0%compd\_1248

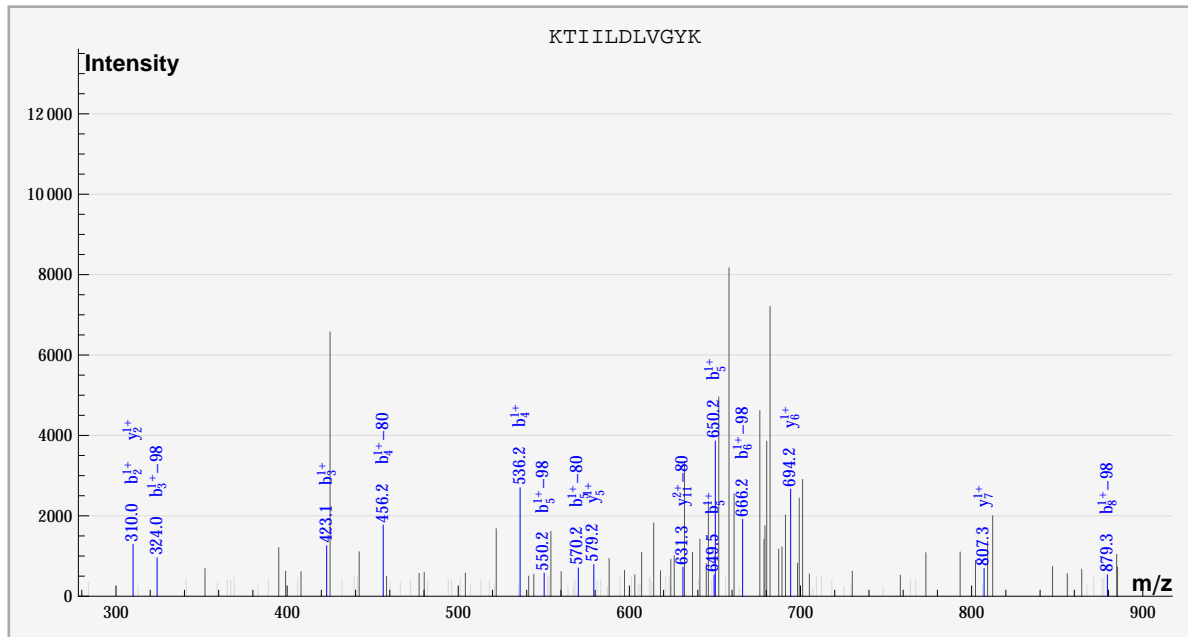

|   | #  | b | b* | #  | y | y* | P | P* |
|---|----|---|----|----|---|----|---|----|
| K | 1  |   |    |    |   |    |   | ✓  |
| T | 2  | ✓ |    | 10 |   |    |   |    |
| I | 3  | ✓ | ✓  | 9  |   |    |   |    |
| I | 4  | ✓ | ✓  | 8  |   |    |   |    |
| L | 5  | ✓ | ✓  | 7  | ✓ |    |   |    |
| D | 6  |   | ✓  | 6  | ✓ |    |   |    |
| L | 7  |   |    | 5  | ✓ |    |   |    |
| V | 8  |   | ✓  | 4  |   |    |   |    |
| G | 9  |   |    | 3  |   |    |   |    |
| Y | 10 |   |    | 2  | ✓ |    |   |    |
| K | 11 |   |    | 1  |   |    |   |    |

⌈ K T ⌋ I ⌋ I ⌋ L ⌋ D ⌋ L V ⌋ G ⌈ Y K

dbValid true KTILDLVGYK PHOS(1) 2. 671. 0.872707 6.10026 100. ? 2688.  
 S\_Acido\_new%gil68567257|gb|AAY80186.1| KTILDLVGYK%:PHOS:::sample\_0%cmpd\_1258

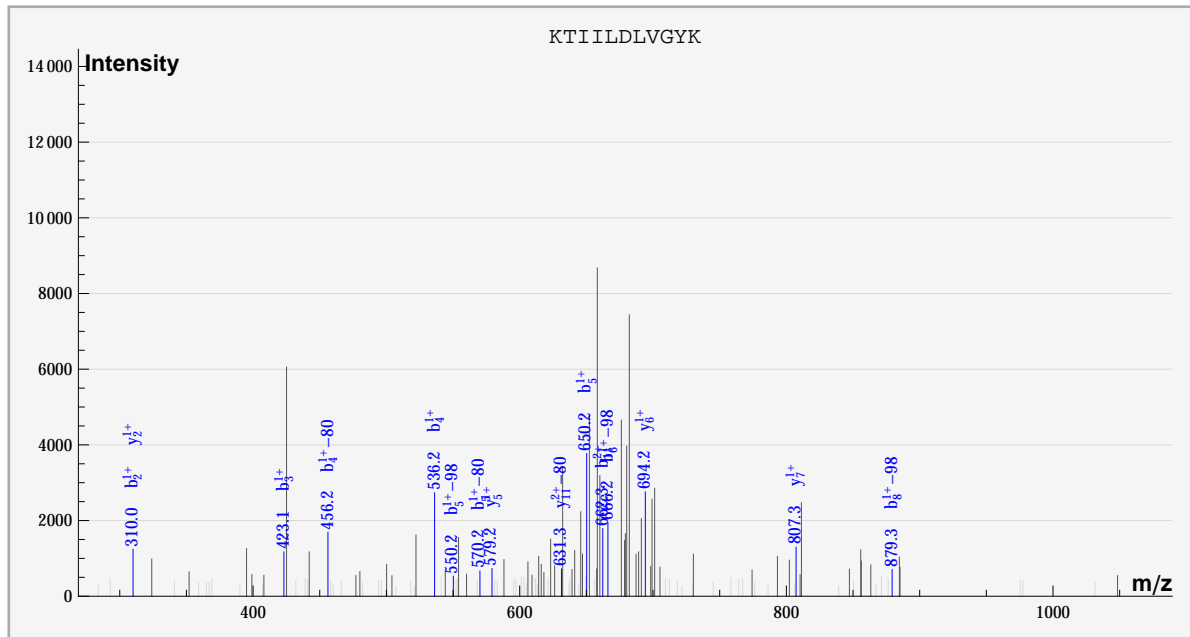

|   | #  | b | b* | #  | y | y* | P | P* |
|---|----|---|----|----|---|----|---|----|
| K | 1  |   |    |    |   |    |   | ✓  |
| T | 2  | ✓ |    | 10 |   |    |   |    |
| I | 3  | ✓ |    | 9  |   |    |   |    |
| I | 4  | ✓ | ✓  | 8  |   |    |   |    |
| L | 5  | ✓ | ✓  | 7  | ✓ |    |   |    |
| D | 6  |   | ✓  | 6  | ✓ |    |   |    |
| L | 7  |   |    | 5  | ✓ |    |   |    |
| V | 8  |   | ✓  | 4  |   |    |   |    |
| G | 9  |   |    | 3  |   |    |   |    |
| Y | 10 |   |    | 2  | ✓ |    |   |    |
| K | 11 | ✓ |    | 1  |   |    |   |    |

[ K T I I L D L V G Y K ]

dbValid true KTILDLVGYK PHOS(1) 2. 671. 0.872707 5.3156 100. ? 2712.  
 S\_Acido\_new%gil68567257|gb|AAY80186.1| KTILDLVGYK%::PHOS:::sample\_0%cmpd\_1279

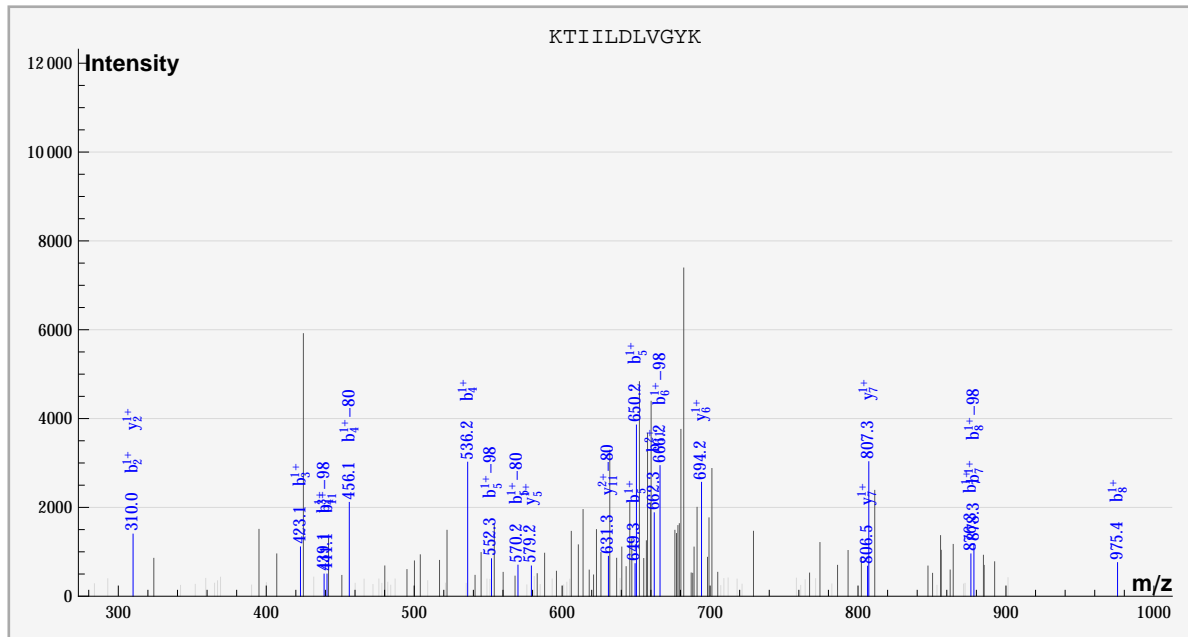

|   | #  | b | b* | #  | y | y* | P | P* |
|---|----|---|----|----|---|----|---|----|
| K | 1  |   |    |    |   |    |   | ✓  |
| T | 2  | ✓ |    | 10 |   |    |   |    |
| I | 3  | ✓ |    | 9  |   |    |   |    |
| I | 4  | ✓ | ✓  | 8  |   |    |   |    |
| L | 5  | ✓ | ✓  | 7  | ✓ |    |   |    |
| D | 6  |   | ✓  | 6  | ✓ |    |   |    |
| L | 7  | ✓ |    | 5  | ✓ |    |   |    |
| V | 8  | ✓ | ✓  | 4  |   |    |   |    |
| G | 9  |   |    | 3  |   |    |   |    |
| Y | 10 |   |    | 2  | ✓ |    |   |    |
| K | 11 | ✓ |    | 1  |   |    |   |    |

[ K T I I L D L V G Y K ]

dbValid true RILDIVGFISK PHOS(1) 2. 671. -0.129503 5.24947 100. ? 3114.  
 S\_Acido\_new%gi|68567344|gb|AAY80273.1| RILDIVGFISK%:.....PHOS::%sample\_0%cmpd\_1706

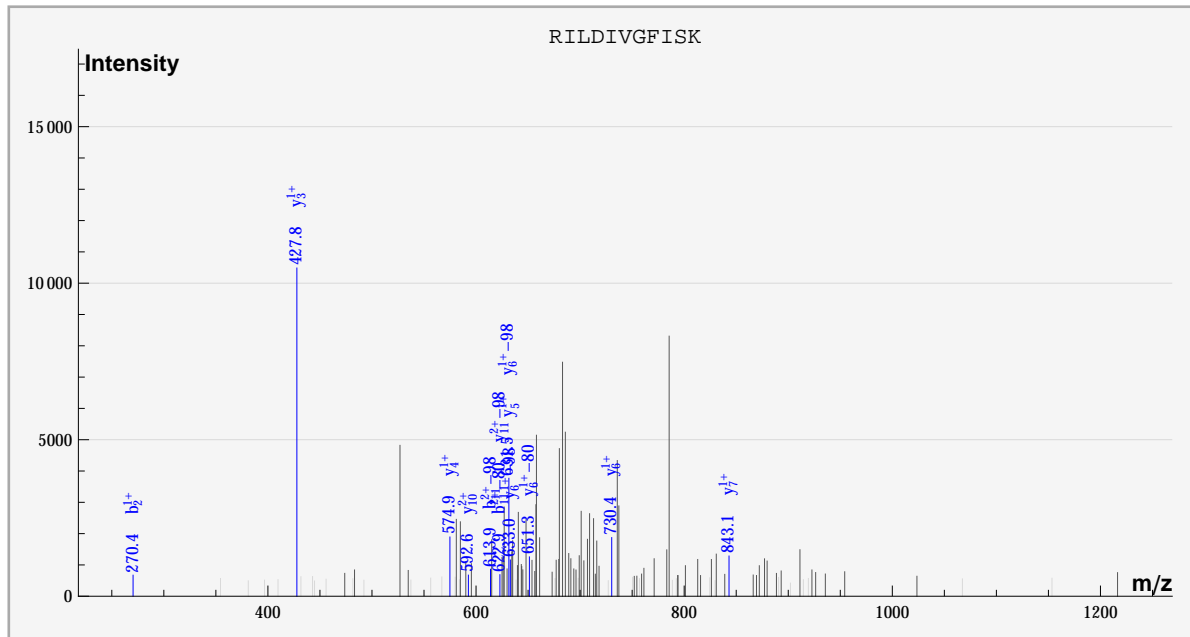

|   | #  | b | b* | #  | y | y* | P | P* |
|---|----|---|----|----|---|----|---|----|
| R | 1  |   |    |    |   |    |   | ✓  |
| I | 2  | ✓ |    | 10 | ✓ |    |   |    |
| L | 3  |   |    | 9  |   |    |   |    |
| D | 4  |   |    | 8  |   |    |   |    |
| I | 5  |   |    | 7  | ✓ |    |   |    |
| V | 6  |   |    | 6  | ✓ | ✓  |   |    |
| G | 7  |   |    | 5  | ✓ |    |   |    |
| F | 8  |   |    | 4  | ✓ |    |   |    |
| I | 9  |   |    | 3  | ✓ |    |   |    |
| S | 10 |   |    | 2  |   |    |   |    |
| K | 11 |   | ✓  | 1  |   |    |   |    |

「 R 「 I 「 L D 「 I 「 V 「 G 「 F 「 I S K 」

dbValid true MIKQILAYIR Oxidation\_M(1),PHOS(1) 2. 671. 1.85908 5.22728 100. ? 4230.

S\_Acido\_new%gil68567947|gb|AAY80876.1| MIKQILAYIR%:Oxidation\_M:::::PHOS:::%sample\_0%cmpd\_2724

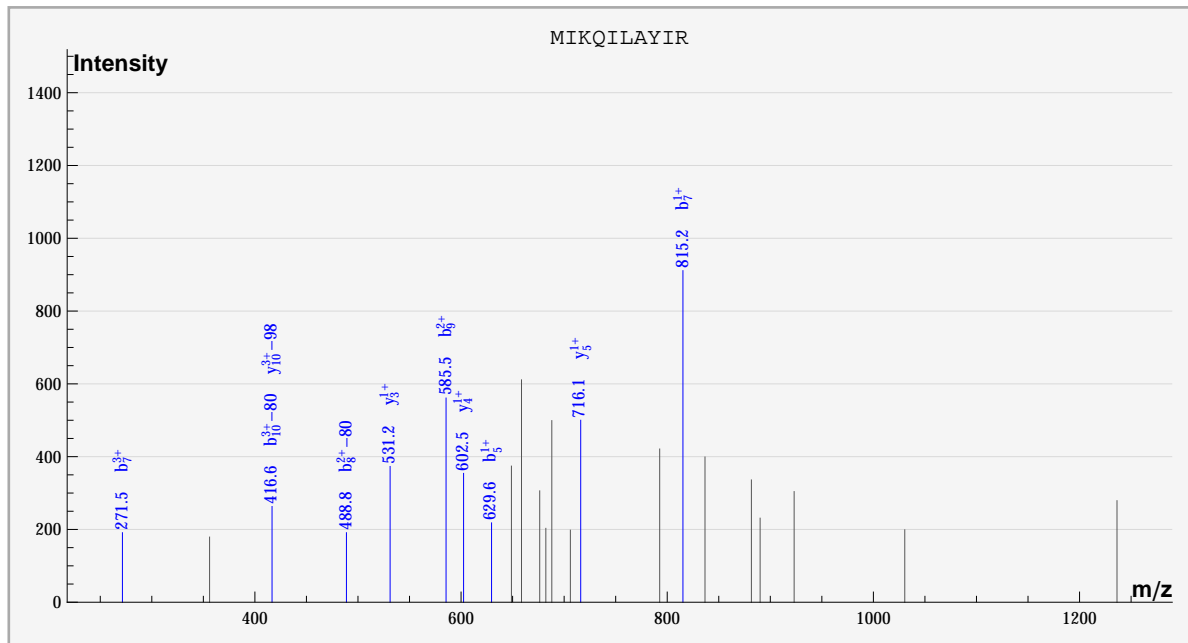

|   | #  | b | b* | # | y | y* | P | P* |
|---|----|---|----|---|---|----|---|----|
| M | 1  |   |    |   |   |    |   | ✓  |
| I | 2  |   |    | 9 |   |    |   |    |
| K | 3  |   |    | 8 |   |    |   |    |
| Q | 4  |   |    | 7 |   |    |   |    |
| I | 5  | ✓ |    | 6 |   |    |   |    |
| L | 6  |   |    | 5 | ✓ |    |   |    |
| A | 7  | ✓ |    | 4 | ✓ |    |   |    |
| Y | 8  |   | ✓  | 3 | ✓ |    |   |    |
| I | 9  | ✓ |    | 2 |   |    |   |    |
| R | 10 |   | ✓  | 1 |   |    |   |    |

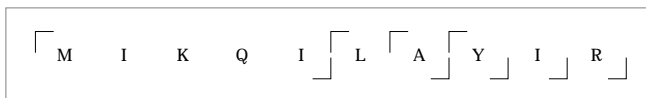

dbValid true KYINVIRDIK PHOS(1) 2. 672. -0.631873 5.17483 100. ? 1710.  
 S\_Acido\_new%gi|68567496|gb|AAY80425.1| KYINVIRDIK%::PHOS:.....%sample\_0%cmpd\_426

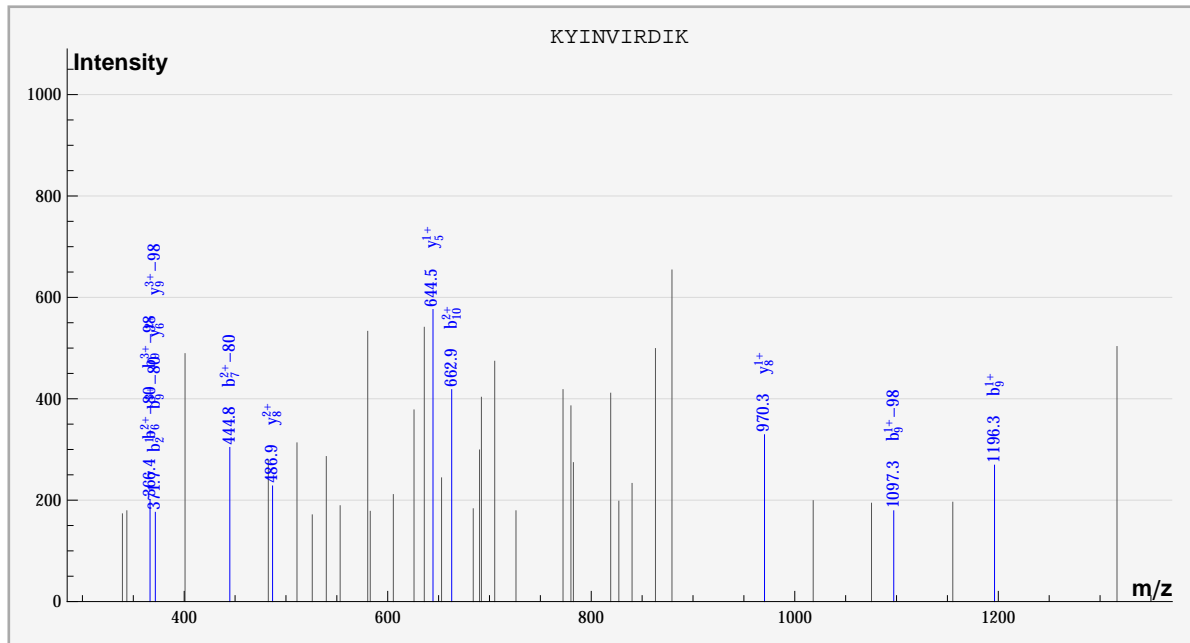

|   | #  | b | b* | # | y | y* | P | P* |
|---|----|---|----|---|---|----|---|----|
| K | 1  |   |    |   |   |    |   |    |
| Y | 2  | ✓ |    | 9 |   | ✓  |   |    |
| I | 3  |   |    | 8 | ✓ |    |   |    |
| N | 4  |   |    | 7 |   |    |   |    |
| V | 5  |   |    | 6 | ✓ |    |   |    |
| I | 6  |   | ✓  | 5 | ✓ |    |   |    |
| R | 7  |   | ✓  | 4 |   |    |   |    |
| D | 8  |   |    | 3 |   |    |   |    |
| I | 9  | ✓ | ✓  | 2 |   |    |   |    |
| K | 10 | ✓ |    | 1 |   |    |   |    |

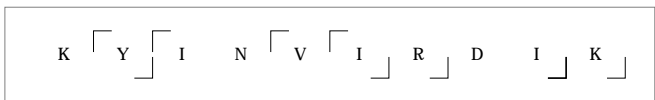

dbValid true IYEQTSIYSR PHOS(1) 2. 672. -1.69988 5.22299 100. ? 2706.  
 S\_Acido\_new%gil68567379|gb|AAY80308.1| IYEQTSIYSR%::PHOS:.....%sample\_0%cmpd\_1332

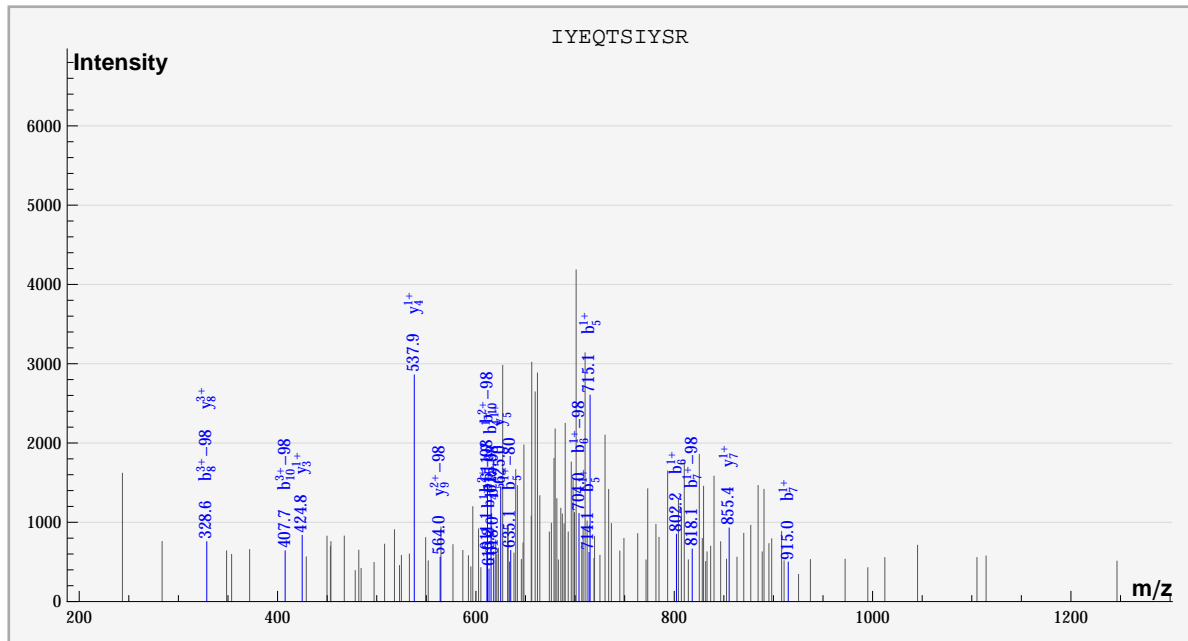

|   | #  | b | b* | # | y | y* | P | P* |
|---|----|---|----|---|---|----|---|----|
| I | 1  |   |    |   |   |    |   |    |
| Y | 2  |   |    | 9 |   | ✓  |   |    |
| E | 3  |   |    | 8 |   | ✓  |   |    |
| Q | 4  | ✓ |    | 7 |   | ✓  |   |    |
| T | 5  | ✓ | ✓  | 6 |   |    |   |    |
| S | 6  | ✓ | ✓  | 5 |   | ✓  |   |    |
| I | 7  | ✓ | ✓  | 4 |   | ✓  |   |    |
| Y | 8  |   | ✓  | 3 |   | ✓  |   |    |
| S | 9  |   |    | 2 |   |    |   |    |
| R | 10 |   | ✓  | 1 |   |    |   |    |

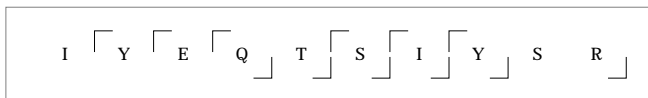

dbValid true SKENSTKEEK PHOS(2) 2. 672. -1.73747 5.00458 100. ? 3210.  
 S\_Acido\_new%gii68567804|gb|AAY80733.1| SKENSTKEEK%:PHOS:::PHOS:::sample\_0%compd\_1703

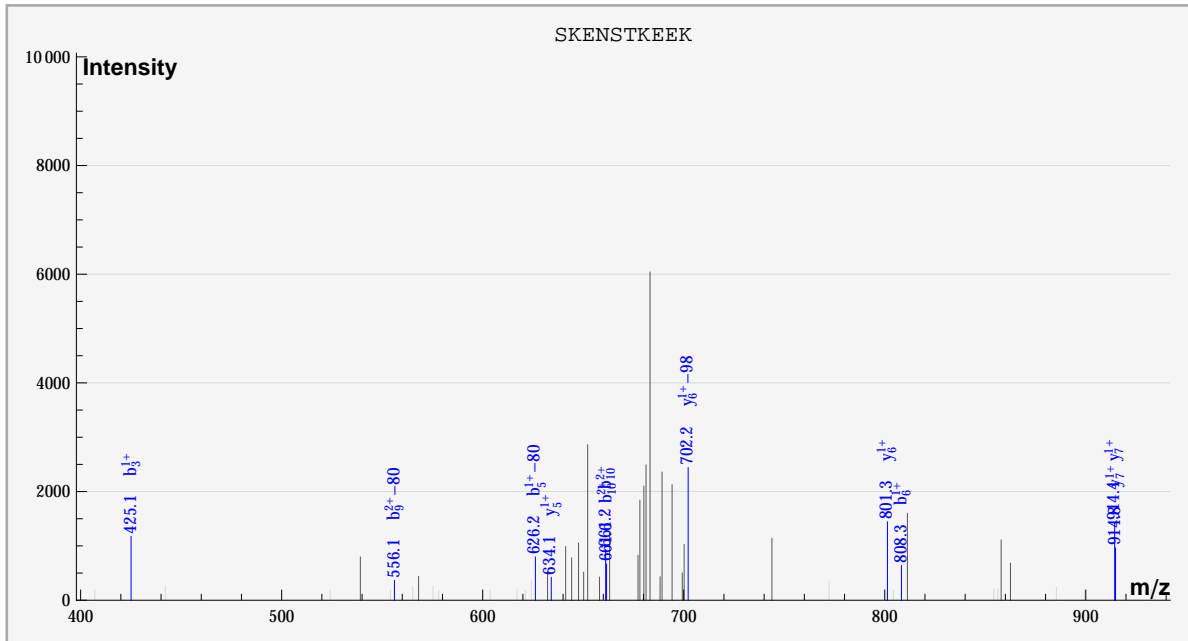

|   | #  | b | b* | # | y | y* | P | P* |
|---|----|---|----|---|---|----|---|----|
| S | 1  |   |    |   |   |    |   |    |
| K | 2  |   |    | 9 |   |    |   |    |
| E | 3  | ✓ |    | 8 |   |    |   |    |
| N | 4  |   |    | 7 | ✓ |    |   |    |
| S | 5  |   | ✓  | 6 | ✓ | ✓  |   |    |
| T | 6  | ✓ |    | 5 | ✓ |    |   |    |
| K | 7  |   |    | 4 |   |    |   |    |
| E | 8  |   |    | 3 |   |    |   |    |
| E | 9  |   | ✓  | 2 |   |    |   |    |
| K | 10 | ✓ |    | 1 |   |    |   |    |

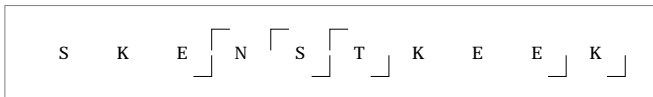



dbValid true SGSEGR PHOS(1) 1. 673. -0.765165 5.26388 100. ? 1698.

S\_Acido\_new%gi|68567998|gb|AAY80927.1| SGSEGR%:PHOS:::sample\_0%compd\_415

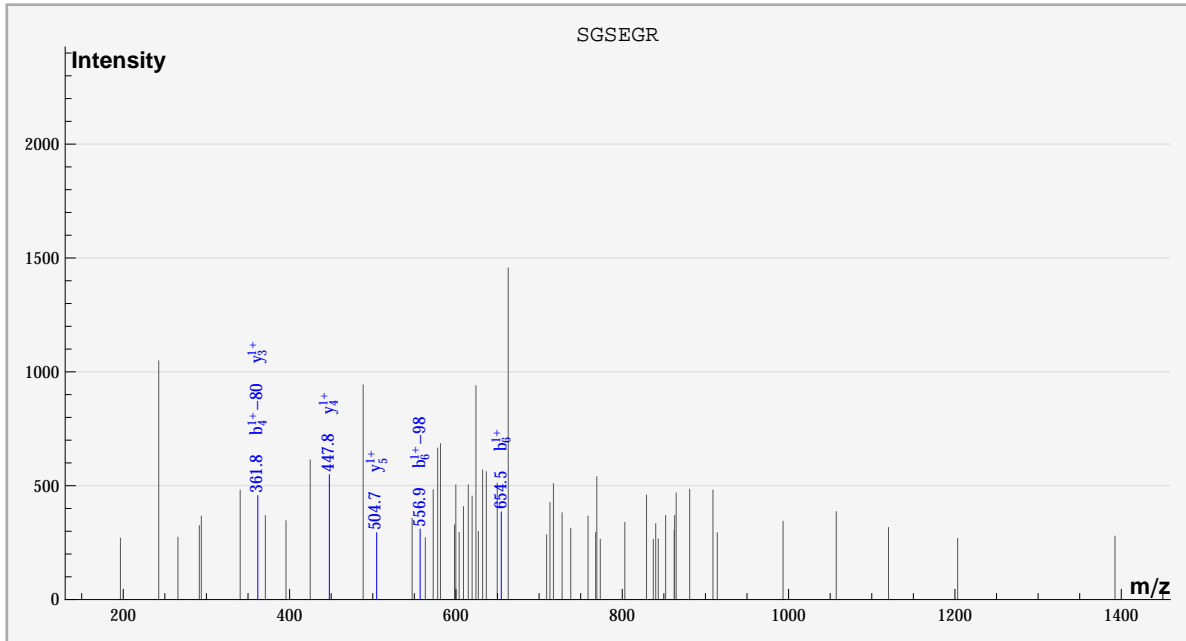

|   | # | b | b* | # | y | y* | P | P* |
|---|---|---|----|---|---|----|---|----|
| S | 1 |   |    |   |   |    |   |    |
| G | 2 |   |    | 5 | ✓ |    |   |    |
| S | 3 |   |    | 4 | ✓ |    |   |    |
| E | 4 | ✓ |    | 3 | ✓ |    |   |    |
| G | 5 |   |    | 2 |   |    |   |    |
| R | 6 | ✓ | ✓  | 1 |   |    |   |    |

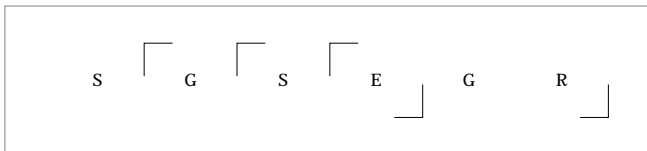

dbValid true QTDAGELSRYSK PHOS(1) 2. 673. 1.30064 5.26972 100. ? 2430.  
 S\_Acido\_new%gi|68567040|gb|AA79969.1| QTDAGELSRYSK%::PHOS:::sample\_0%compd\_1033

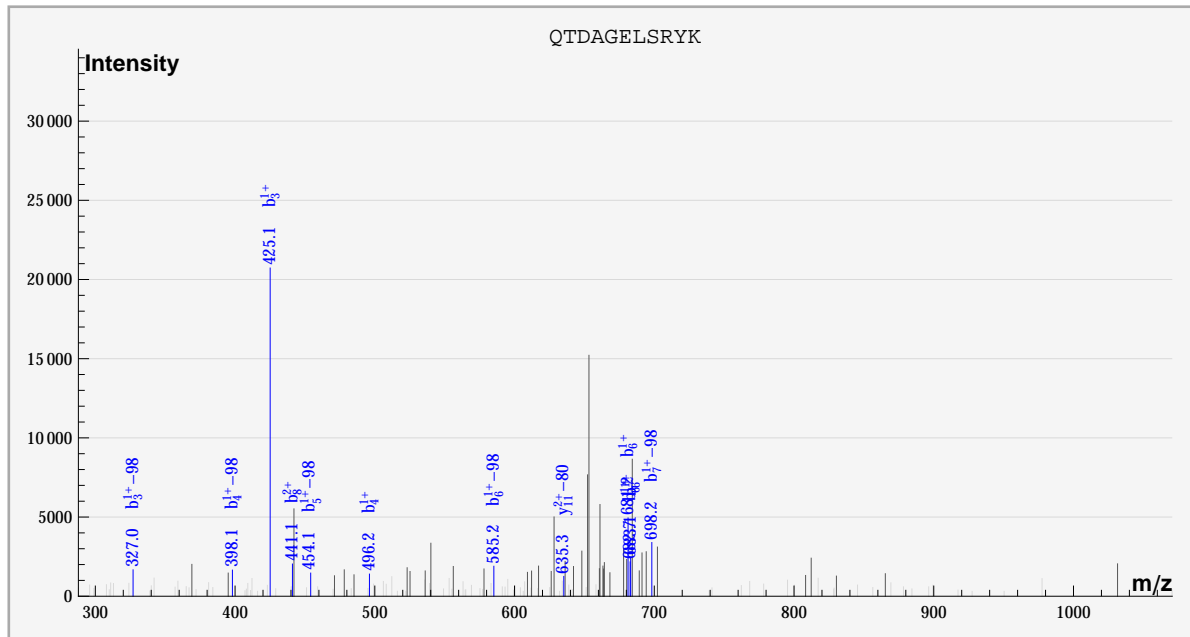

|   | #  | b | b* | #  | y | y* | P | P* |
|---|----|---|----|----|---|----|---|----|
| Q | 1  |   |    |    |   |    |   | ✓  |
| T | 2  |   |    | 10 |   |    |   |    |
| D | 3  | ✓ | ✓  | 9  |   |    |   |    |
| A | 4  | ✓ | ✓  | 8  |   |    |   |    |
| G | 5  |   | ✓  | 7  |   |    |   |    |
| E | 6  | ✓ | ✓  | 6  |   |    |   |    |
| L | 7  |   | ✓  | 5  |   |    |   |    |
| S | 8  | ✓ |    | 4  |   |    |   |    |
| R | 9  |   |    | 3  |   |    |   |    |
| Y | 10 |   |    | 2  |   |    |   |    |
| K | 11 |   |    | 1  |   |    |   |    |

Q T D A G E L S R Y K

dbValid true QTDAGELSRYSK PHOS(1) 2. 673. 1.30064 5.5691 100. ? 2454.  
 S\_Acido\_new%gil68567040|gb|AA79969.1| QTDAGELSRYSK%::PHOS:::sample\_0%compd\_1053

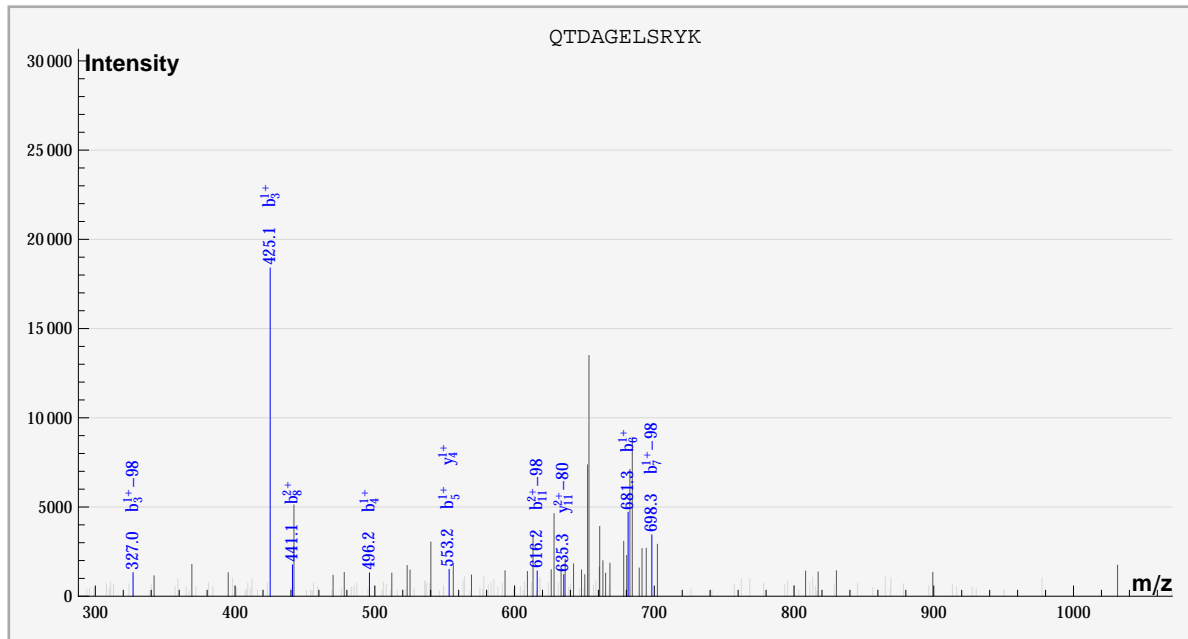

|   | #  | b | b* | #  | y | y* | P | P* |
|---|----|---|----|----|---|----|---|----|
| Q | 1  |   |    |    |   |    |   | ✓  |
| T | 2  |   |    | 10 |   |    |   |    |
| D | 3  | ✓ | ✓  | 9  |   |    |   |    |
| A | 4  | ✓ |    | 8  |   |    |   |    |
| G | 5  | ✓ |    | 7  |   |    |   |    |
| E | 6  | ✓ |    | 6  |   |    |   |    |
| L | 7  |   | ✓  | 5  |   |    |   |    |
| S | 8  | ✓ |    | 4  | ✓ |    |   |    |
| R | 9  |   |    | 3  |   |    |   |    |
| Y | 10 |   |    | 2  |   |    |   |    |
| K | 11 |   | ✓  | 1  |   |    |   |    |

Q T D A G E L S R Y K

dbValid true QTDAGELSRYSK PHOS(1) 2. 673. 1.30064 5.47114 100. ? 2466.  
 S\_Acido\_new%gil68567040|gb|AA79969.1| QTDAGELSRYSK%::PHOS:::sample\_0%compd\_1063

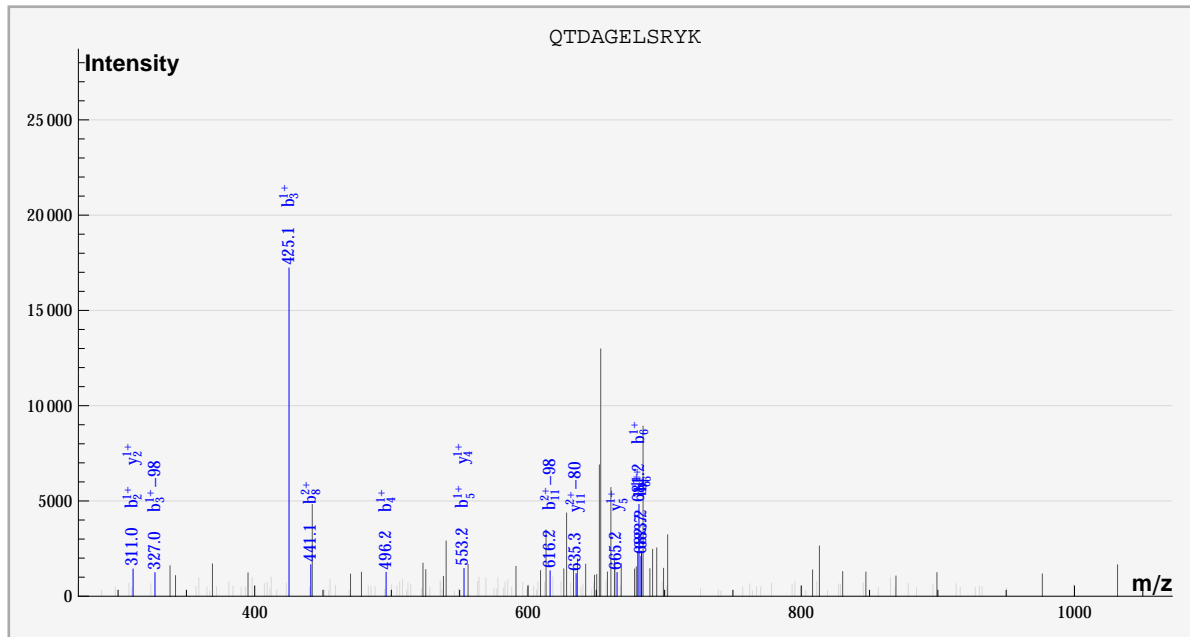

|   | #  | b | b* | #  | y | y* | P | P* |
|---|----|---|----|----|---|----|---|----|
| Q | 1  |   |    |    |   |    |   | ✓  |
| T | 2  | ✓ |    | 10 |   |    |   |    |
| D | 3  | ✓ | ✓  | 9  |   |    |   |    |
| A | 4  | ✓ |    | 8  |   |    |   |    |
| G | 5  | ✓ |    | 7  |   |    |   |    |
| E | 6  | ✓ |    | 6  |   |    |   |    |
| L | 7  |   |    | 5  | ✓ |    |   |    |
| S | 8  | ✓ |    | 4  | ✓ |    |   |    |
| R | 9  |   |    | 3  |   |    |   |    |
| Y | 10 |   |    | 2  | ✓ |    |   |    |
| K | 11 |   | ✓  | 1  |   |    |   |    |

Q T D A G E L S R Y K

dbValid true QTDAGELSRYSK PHOS(1) 2. 673. 1.30064 5.54198 100. ? 2478.  
 S\_Acido\_new%gi|68567040|gb|AA79969.1| QTDAGELSRYSK%::PHOS%:::sample\_0%compd\_1073

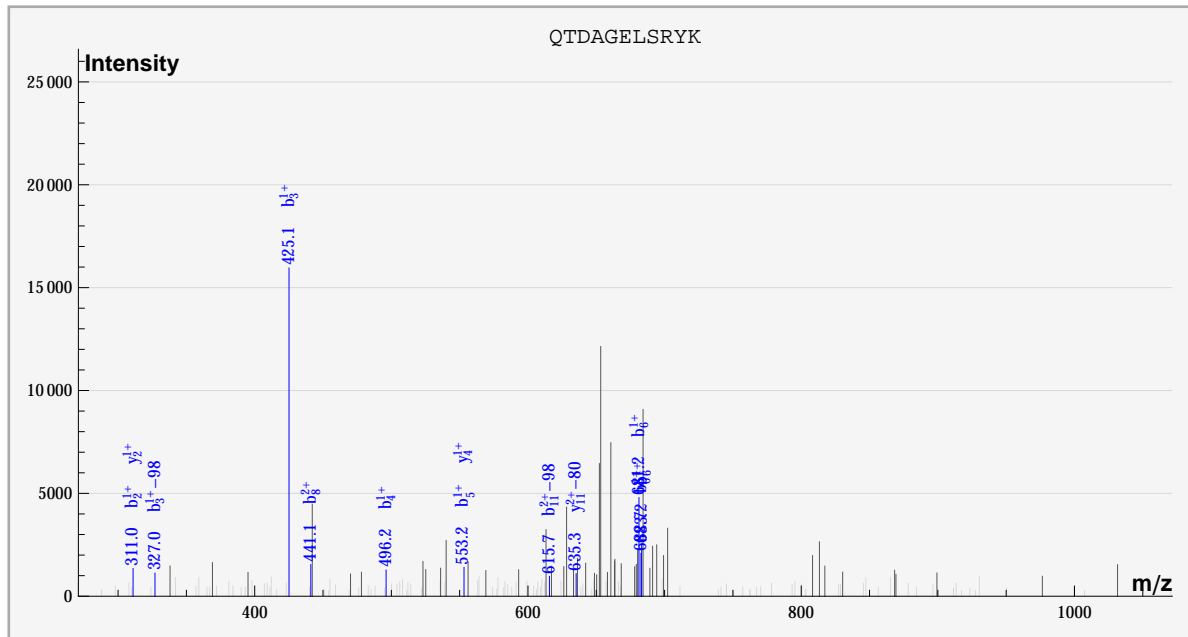

|   | #  | b | b* | #  | y | y* | P | P* |
|---|----|---|----|----|---|----|---|----|
| Q | 1  |   |    |    |   |    |   | ✓  |
| T | 2  | ✓ |    | 10 |   |    |   |    |
| D | 3  | ✓ | ✓  | 9  |   |    |   |    |
| A | 4  | ✓ |    | 8  |   |    |   |    |
| G | 5  | ✓ |    | 7  |   |    |   |    |
| E | 6  | ✓ |    | 6  |   |    |   |    |
| L | 7  |   |    | 5  |   |    |   |    |
| S | 8  | ✓ |    | 4  | ✓ |    |   |    |
| R | 9  |   |    | 3  |   |    |   |    |
| Y | 10 |   |    | 2  | ✓ |    |   |    |
| K | 11 |   | ✓  | 1  |   |    |   |    |

Q T D A G E L S R Y K

dbValid true QTDAGELSRYSK PHOS(1) 2. 673. 1.30064 4.98225 100. ? 2874.  
 S\_Acido\_new%gi|68567040|gb|AAY79969.1| QTDAGELSRYSK%::PHOS:.....%sample\_0%compd\_1415

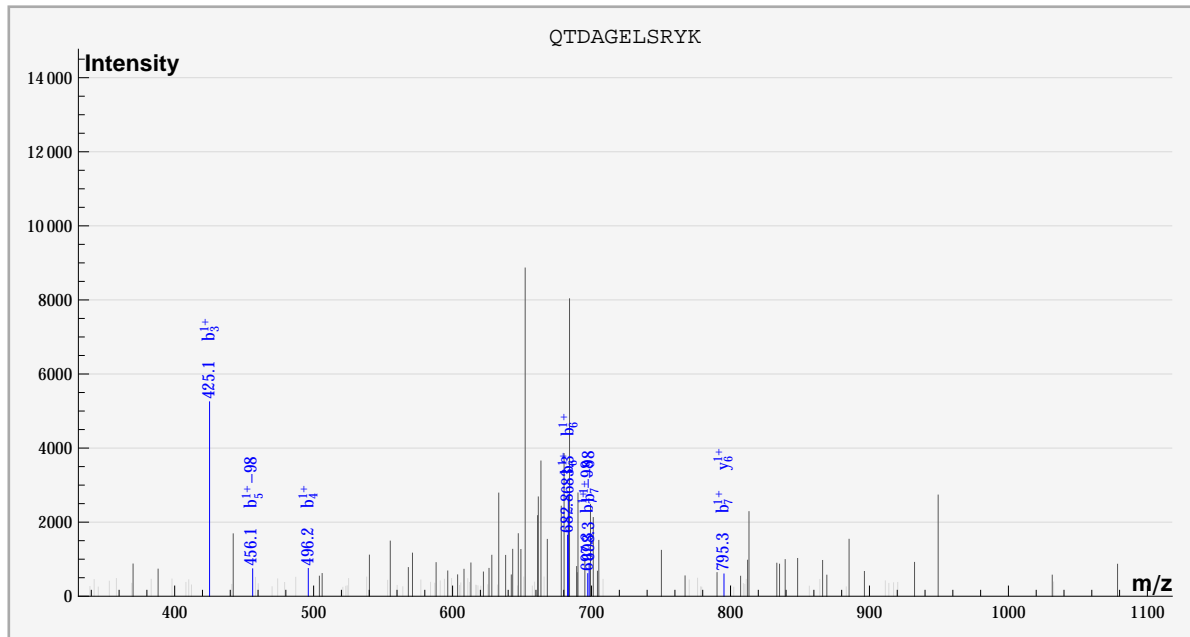

|   | #  | b | b* | #  | y | y* | P | P* |
|---|----|---|----|----|---|----|---|----|
| Q | 1  |   |    |    |   |    |   |    |
| T | 2  |   |    | 10 |   |    |   |    |
| D | 3  | ✓ |    | 9  |   |    |   |    |
| A | 4  | ✓ |    | 8  |   |    |   |    |
| G | 5  |   | ✓  | 7  |   |    |   |    |
| E | 6  | ✓ |    | 6  | ✓ |    |   |    |
| L | 7  | ✓ | ✓  | 5  |   |    |   |    |
| S | 8  |   |    | 4  |   |    |   |    |
| R | 9  |   |    | 3  |   |    |   |    |
| Y | 10 |   |    | 2  |   |    |   |    |
| K | 11 |   |    | 1  |   |    |   |    |

Q T D A G E L S R Y K

dbValid true ISELGYSEKR PHOS(2) 2. 673. -1.72202 5.06997 100. ? 306.  
 S\_Acido\_new%gi|68566552|gb|AA79481.1| ISELGYSEKR%::PHOS:::PHOS:::sample\_0%compd\_1570

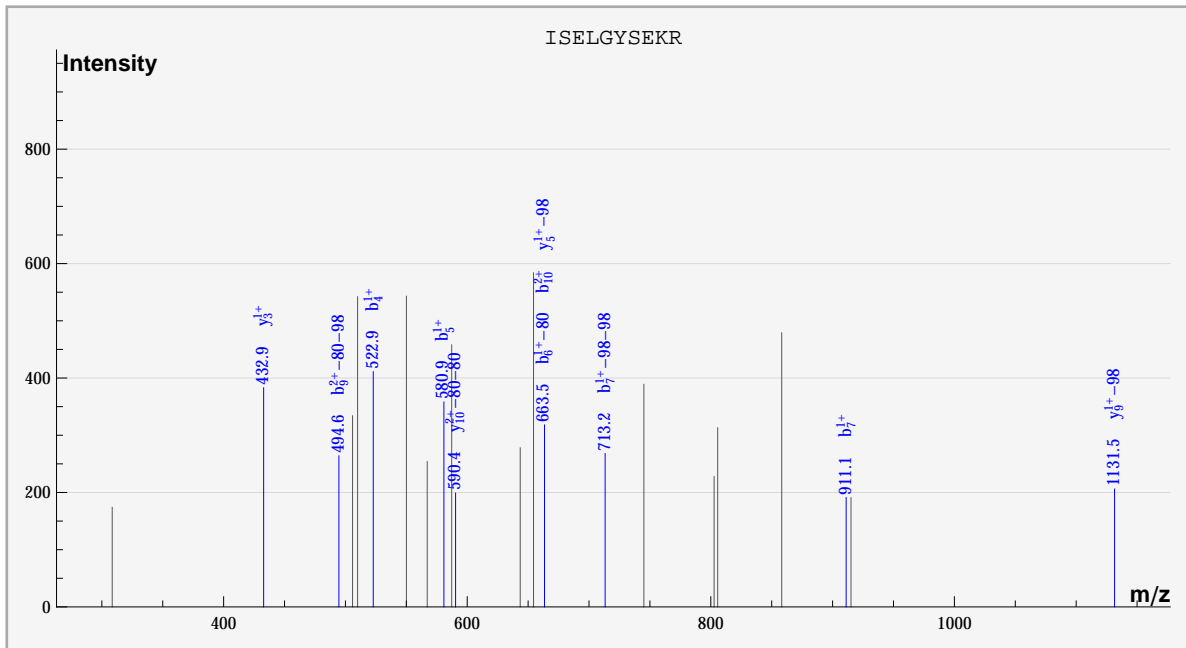

|   | #  | b | b* | # | y | y* | P | P* |
|---|----|---|----|---|---|----|---|----|
| I | 1  |   |    |   |   |    |   | ✓  |
| S | 2  |   |    | 9 |   | ✓  |   |    |
| E | 3  |   |    | 8 |   |    |   |    |
| L | 4  | ✓ |    | 7 |   |    |   |    |
| G | 5  | ✓ |    | 6 |   |    |   |    |
| Y | 6  |   | ✓  | 5 |   | ✓  |   |    |
| S | 7  | ✓ | ✓  | 4 |   |    |   |    |
| E | 8  |   |    | 3 | ✓ |    |   |    |
| K | 9  |   | ✓  | 2 |   |    |   |    |
| R | 10 | ✓ |    | 1 |   |    |   |    |

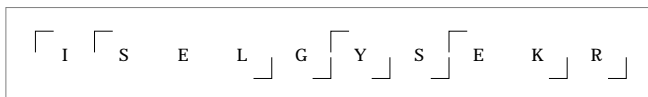

dbValid true YVYYTTPKR PHOS(2) 2. 673.89 1.89016 5.16893 100. ? 3522.  
 S\_Acido\_new%gil68567917|gb|AAy80846.1| YVYYTTPKR%:PHOS:::PHOS:::sample\_1%cmpd\_2301

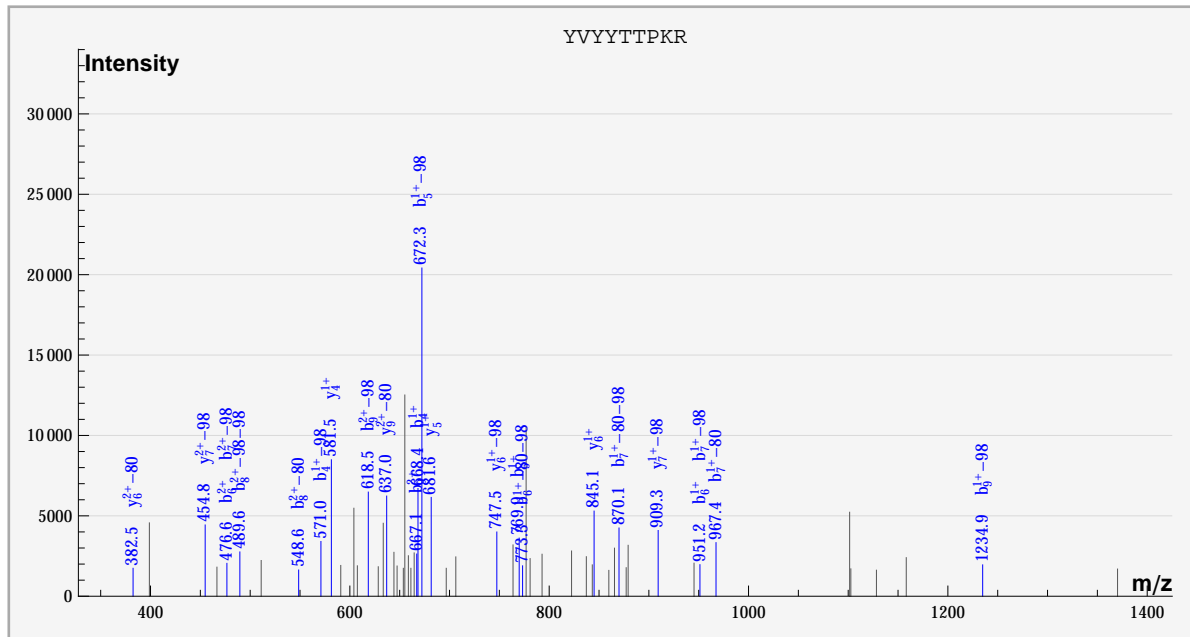

|   | # | b | b* | # | y | y* | P | P* |
|---|---|---|----|---|---|----|---|----|
| Y | 1 |   |    |   |   |    |   | ✓  |
| V | 2 |   |    | 8 |   |    |   |    |
| Y | 3 |   |    | 7 |   | ✓  |   |    |
| Y | 4 | ✓ | ✓  | 6 | ✓ | ✓  |   |    |
| T | 5 | ✓ | ✓  | 5 | ✓ |    |   |    |
| T | 6 | ✓ | ✓  | 4 | ✓ |    |   |    |
| P | 7 |   | ✓  | 3 |   |    |   |    |
| K | 8 |   | ✓  | 2 |   |    |   |    |
| R | 9 | ✓ | ✓  | 1 |   |    |   |    |

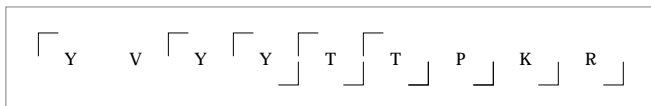



dbValid true WLESKDSVSSK PHOS(1) 2. 674. -0.694608 5.10321 100. ? 1782.  
 S\_Acido\_new%gi|68568547|gb|AAY81476.1| WLESKDSVSSK%:::PHOS::%sample\_0%cmpd\_467

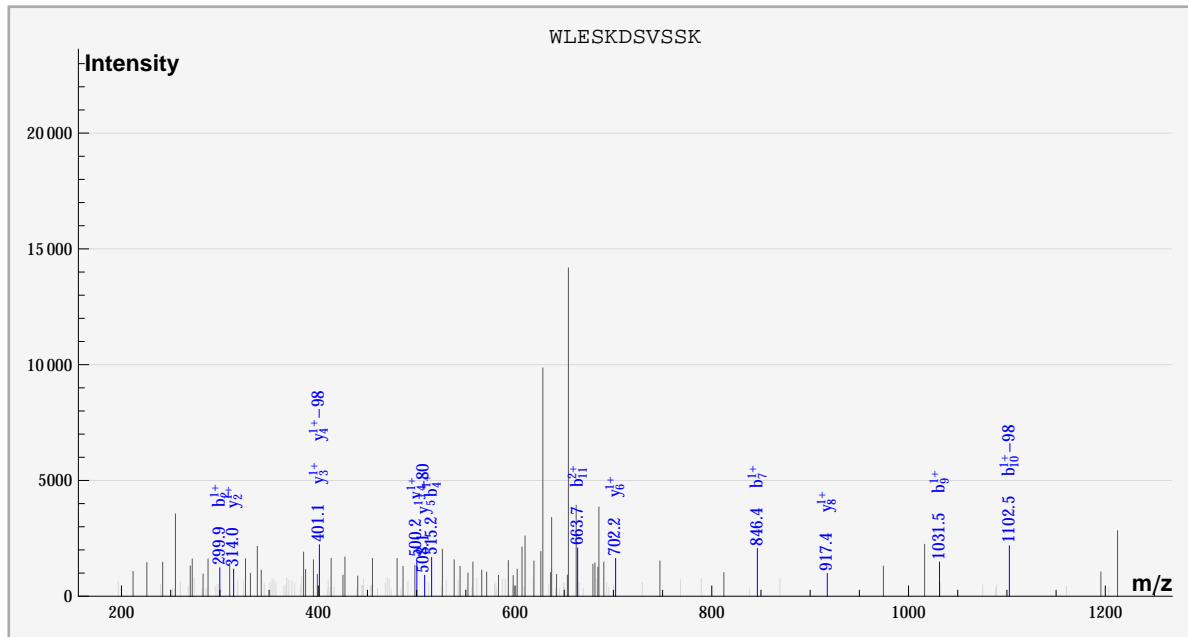

|   | #  | b | b* | #  | y | y* | P | P* |
|---|----|---|----|----|---|----|---|----|
| W | 1  |   |    |    |   |    |   |    |
| L | 2  | ✓ |    | 10 |   |    |   |    |
| E | 3  |   |    | 9  |   |    |   |    |
| S | 4  | ✓ |    | 8  | ✓ |    |   |    |
| K | 5  |   |    | 7  |   |    |   |    |
| D | 6  |   |    | 6  | ✓ |    |   |    |
| S | 7  | ✓ |    | 5  |   | ✓  |   |    |
| V | 8  |   |    | 4  | ✓ | ✓  |   |    |
| S | 9  | ✓ |    | 3  | ✓ |    |   |    |
| S | 10 |   | ✓  | 2  | ✓ |    |   |    |
| K | 11 | ✓ |    | 1  |   |    |   |    |

W L E S K D S V S S K

dbValid true VKMLYSILQGT Oxidation\_M(1),PHOS(1) 2. 674. 0.832727 5.05291 100. ? 1848.  
 S\_Acido\_new%gi|68567308|gb|AAAY80237.1| VKMLYSILQGT%:::Oxidation\_M:::PHOS:%sample\_0%compd\_549

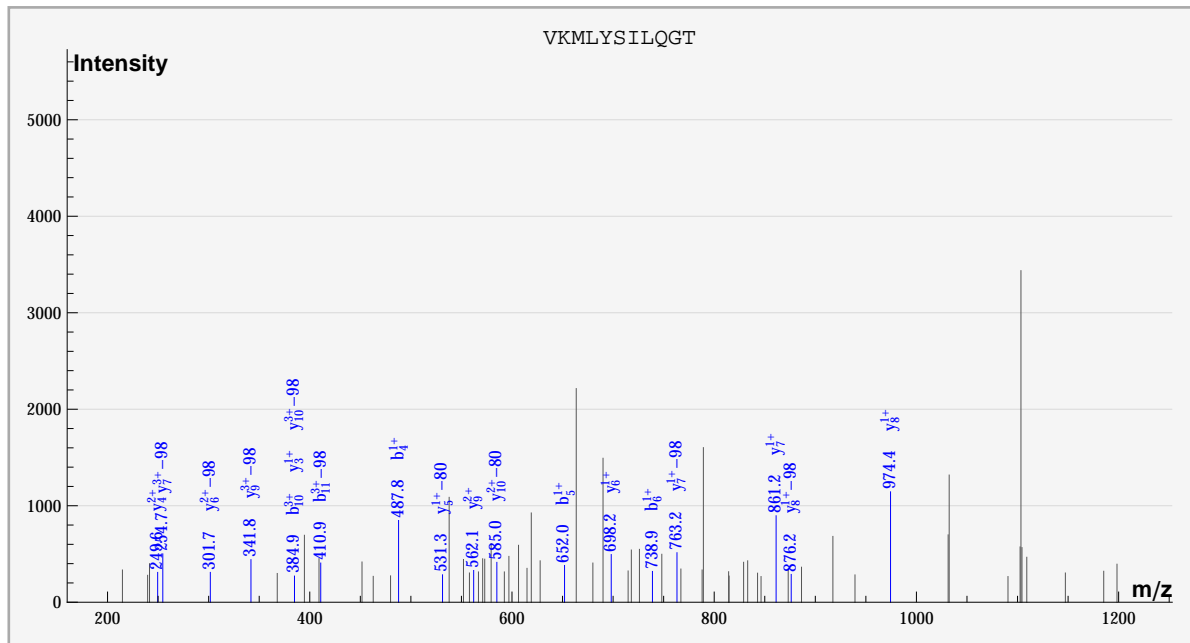

|   | #  | b | b* | #  | y | y* | P | P* |
|---|----|---|----|----|---|----|---|----|
| V | 1  |   |    |    |   |    |   |    |
| K | 2  |   |    | 10 |   | ✓  |   |    |
| M | 3  |   |    | 9  | ✓ | ✓  |   |    |
| L | 4  | ✓ |    | 8  | ✓ | ✓  |   |    |
| Y | 5  | ✓ |    | 7  | ✓ | ✓  |   |    |
| S | 6  | ✓ |    | 6  | ✓ | ✓  |   |    |
| I | 7  |   |    | 5  |   | ✓  |   |    |
| L | 8  |   |    | 4  | ✓ |    |   |    |
| Q | 9  |   |    | 3  | ✓ |    |   |    |
| G | 10 | ✓ |    | 2  |   |    |   |    |
| T | 11 |   | ✓  | 1  |   |    |   |    |

V [ K [ M [ L [ Y [ S [ I [ L [ Q [ G [ T ]

dbValid true KYADMLQIGAR PHOS(1) 2. 674. -0.679678 5.08081 100. ? 3882.

S\_Acido\_new%gil68566673|gb|AAY79602.1| KYADMLQIGAR%::PHOS:::sample\_0%compd\_2407

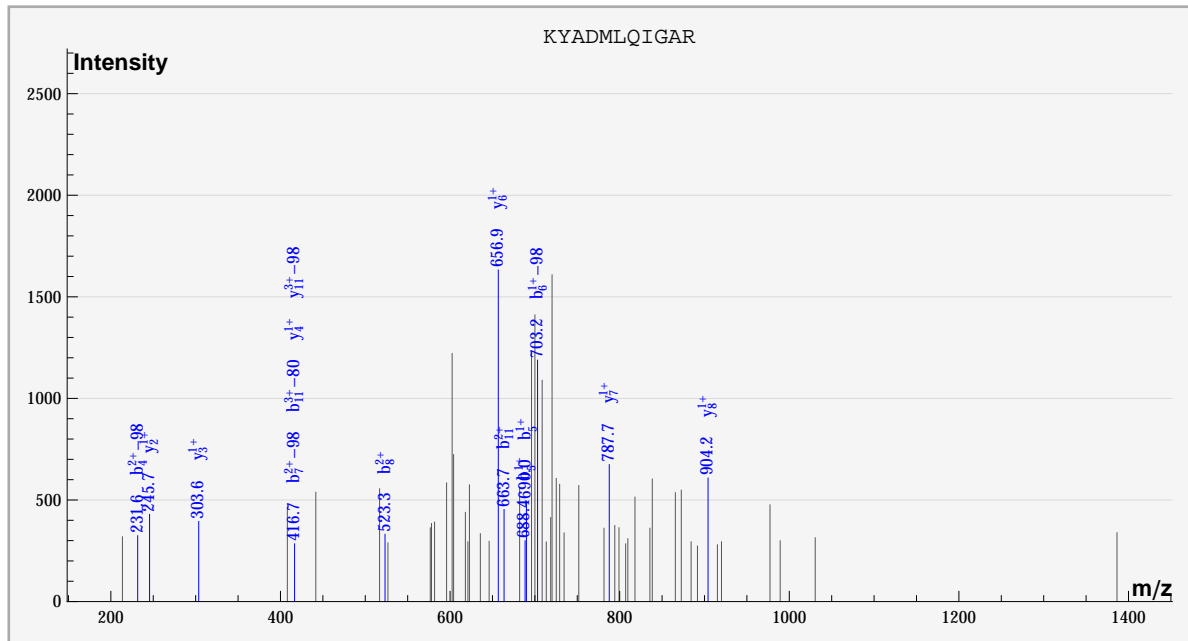

|   | #  | b | b* | #  | y | y* | P | P* |
|---|----|---|----|----|---|----|---|----|
| K | 1  |   |    |    |   |    |   | ✓  |
| Y | 2  |   |    | 10 |   |    |   |    |
| A | 3  |   |    | 9  |   |    |   |    |
| D | 4  |   | ✓  | 8  |   | ✓  |   |    |
| M | 5  | ✓ |    | 7  |   | ✓  |   |    |
| L | 6  |   | ✓  | 6  |   | ✓  |   |    |
| Q | 7  |   | ✓  | 5  |   |    |   |    |
| I | 8  | ✓ |    | 4  |   | ✓  |   |    |
| G | 9  |   |    | 3  |   | ✓  |   |    |
| A | 10 |   |    | 2  |   | ✓  |   |    |
| R | 11 | ✓ | ✓  | 1  |   |    |   |    |

[ K Y A D M L Q I G A R ]

dbValid true VKILINNSGYEALRSR PHOS(1) 3. 675. 1.03301 4.96686 100. ? 1998.  
 S\_Acido\_new%gi|68568120|gb|AAY81049.1| VKILINNSGYEALRSR%:.....PHOS::%sample\_0%cmpd\_654

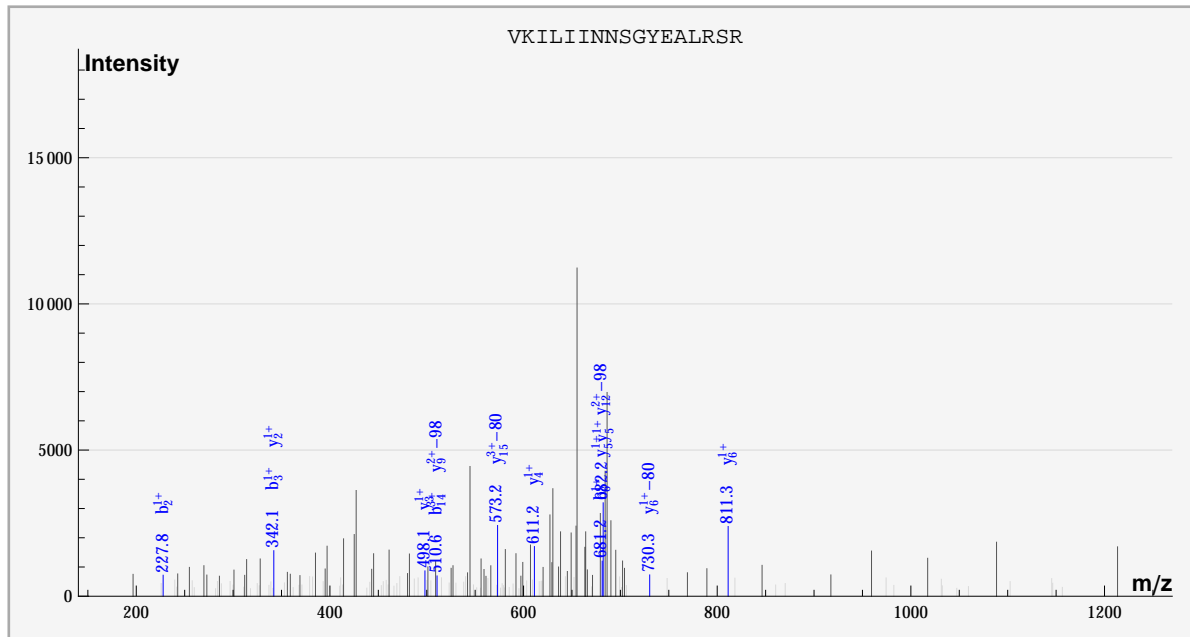

|   | #  | b | b* | #  | y | y* | P | P* |
|---|----|---|----|----|---|----|---|----|
| V | 1  |   |    |    |   |    |   |    |
| K | 2  | ✓ |    | 16 |   |    |   |    |
| I | 3  | ✓ |    | 15 | ✓ |    |   |    |
| L | 4  |   |    | 14 |   |    |   |    |
| I | 5  |   |    | 13 |   |    |   |    |
| I | 6  | ✓ |    | 12 | ✓ |    |   |    |
| N | 7  |   |    | 11 |   |    |   |    |
| N | 8  |   |    | 10 |   |    |   |    |
| S | 9  |   |    | 9  | ✓ |    |   |    |
| G | 10 |   |    | 8  |   |    |   |    |
| Y | 11 |   |    | 7  |   |    |   |    |
| E | 12 |   |    | 6  | ✓ | ✓  |   |    |
| A | 13 |   |    | 5  | ✓ |    |   |    |
| L | 14 | ✓ |    | 4  | ✓ |    |   |    |
| R | 15 |   |    | 3  | ✓ |    |   |    |
| S | 16 |   |    | 2  | ✓ |    |   |    |
| R | 17 |   |    | 1  |   |    |   |    |

V K I L I I N N S G Y E A L R S R

dbValid true VKILIINNSGYEALRSR PHOS(1) 3. 675. 1.03301 5.45965 100. ? 2004.  
 S\_Acido\_new%gi|68568120|gb|AA81049.1| VKILIINNSGYEALRSR%:.....PHOS::%sample\_0%compd\_663

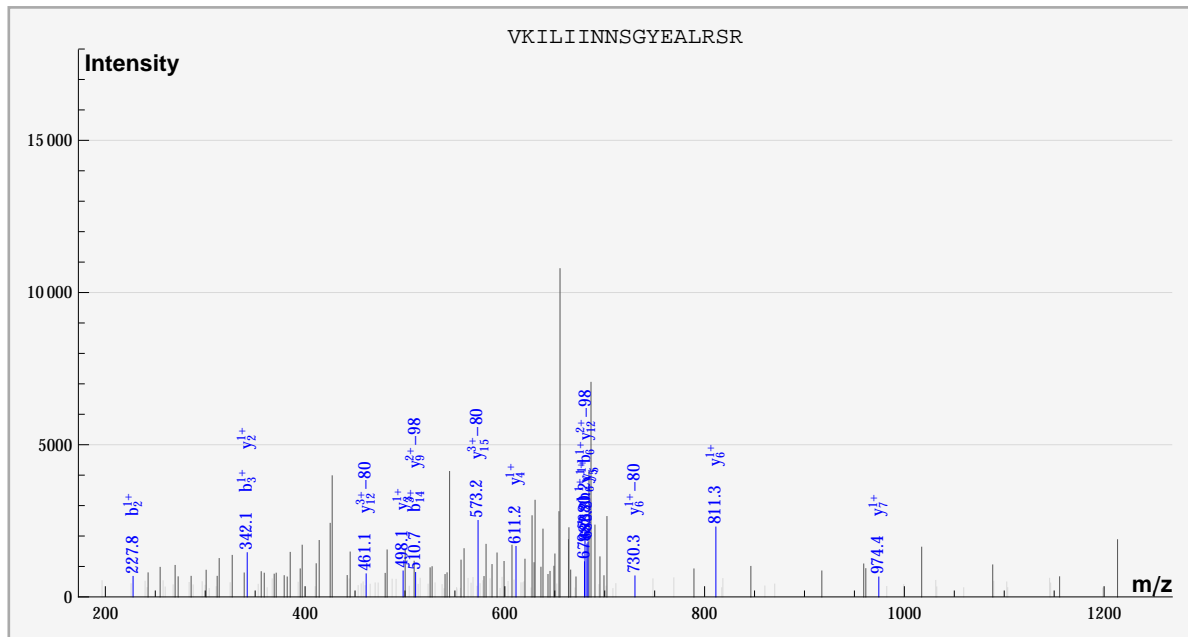

|   | #  | b | b* | #  | y | y* | P | P* |
|---|----|---|----|----|---|----|---|----|
| V | 1  |   |    |    |   |    |   |    |
| K | 2  | ✓ |    | 16 |   |    |   |    |
| I | 3  | ✓ |    | 15 | ✓ |    |   |    |
| L | 4  |   |    | 14 |   |    |   |    |
| I | 5  |   |    | 13 |   |    |   |    |
| I | 6  | ✓ |    | 12 | ✓ |    |   |    |
| N | 7  |   |    | 11 |   |    |   |    |
| N | 8  |   |    | 10 |   |    |   |    |
| S | 9  |   |    | 9  | ✓ |    |   |    |
| G | 10 |   |    | 8  |   |    |   |    |
| Y | 11 |   |    | 7  | ✓ |    |   |    |
| E | 12 |   |    | 6  | ✓ | ✓  |   |    |
| A | 13 |   |    | 5  | ✓ |    |   |    |
| L | 14 | ✓ |    | 4  | ✓ |    |   |    |
| R | 15 |   |    | 3  | ✓ |    |   |    |
| S | 16 |   |    | 2  | ✓ |    |   |    |
| R | 17 |   |    | 1  |   |    |   |    |

V K I I L I I N N S G Y E A L R S R

dbValid true QISISLQGQSK PHOS(2) 2. 675. -0.200918 5.28634 100. ? 2172.  
 S\_Acido\_new%gil68567692|gb|AAy80621.1| QISISLQGQSK%::::PHOS::::PHOS::%sample\_0%cmpd\_807

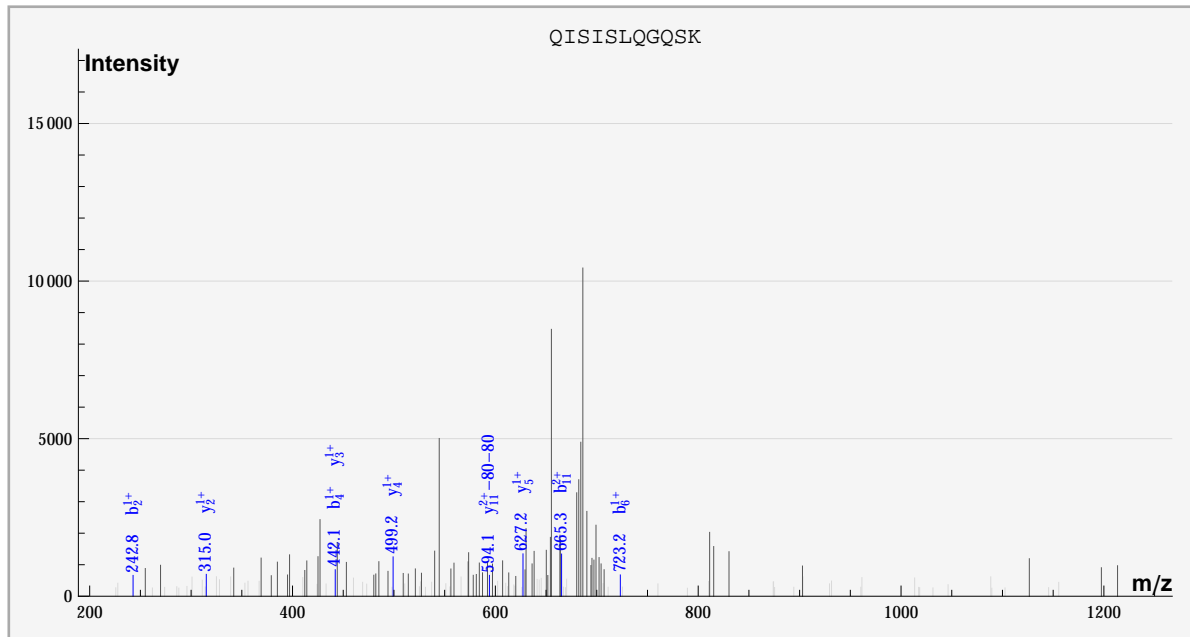

|   | #  | b | b* | #  | y | y* | P | P* |
|---|----|---|----|----|---|----|---|----|
| Q | 1  |   |    |    |   |    |   | ✓  |
| I | 2  | ✓ |    | 10 |   |    |   |    |
| S | 3  |   |    | 9  |   |    |   |    |
| I | 4  | ✓ |    | 8  |   |    |   |    |
| S | 5  |   |    | 7  |   |    |   |    |
| L | 6  | ✓ |    | 6  |   |    |   |    |
| Q | 7  |   |    | 5  | ✓ |    |   |    |
| G | 8  |   |    | 4  | ✓ |    |   |    |
| Q | 9  |   |    | 3  | ✓ |    |   |    |
| S | 10 |   |    | 2  | ✓ |    |   |    |
| K | 11 | ✓ |    | 1  |   |    |   |    |

Q I S I S L Q G Q S K

dbValid true TYITADIYAR PHOS(2) 2. 675. -1.22493 5.002 100. ? 2328.

S\_Acido\_new%gii68566860|gb|AAY79789.1| TYITADIYAR%:PHOS:PHOS:.....:sample\_0%compd\_992

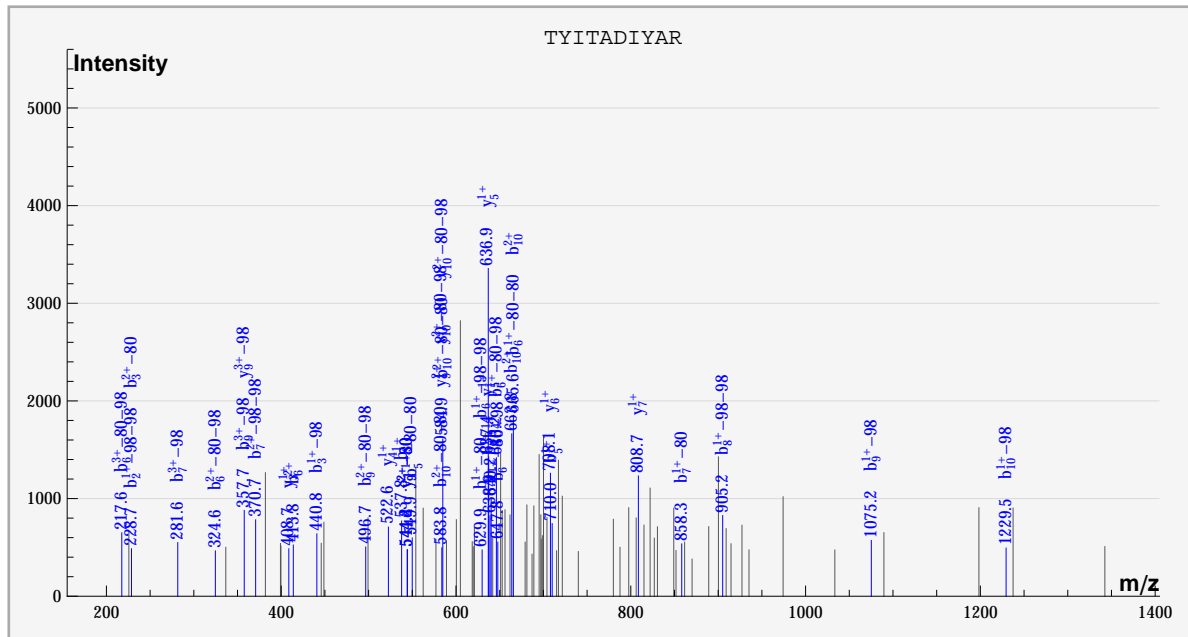

|   | #  | b | b* | # | y | y* | P | P* |
|---|----|---|----|---|---|----|---|----|
| T | 1  |   |    |   |   |    |   | ✓  |
| Y | 2  |   | ✓  | 9 | ✓ | ✓  |   |    |
| I | 3  | ✓ | ✓  | 8 |   |    |   |    |
| T | 4  | ✓ |    | 7 | ✓ |    |   |    |
| A | 5  | ✓ | ✓  | 6 | ✓ |    |   |    |
| D | 6  | ✓ | ✓  | 5 | ✓ |    |   |    |
| I | 7  |   | ✓  | 4 | ✓ |    |   |    |
| Y | 8  |   | ✓  | 3 | ✓ |    |   |    |
| A | 9  |   | ✓  | 2 |   |    |   |    |
| R | 10 | ✓ | ✓  | 1 |   |    |   |    |

T Y I T A D I Y A R

dbValid true EYIYYINSK PHOS(2) 2. 675. 1.76418 5.27179 100. ? 2958.  
 S\_Acido\_new%gi|68568065|gb|AA80994.1| EYIYYINSK%::PHOS:::PHOS::%sample\_0%compd\_1490

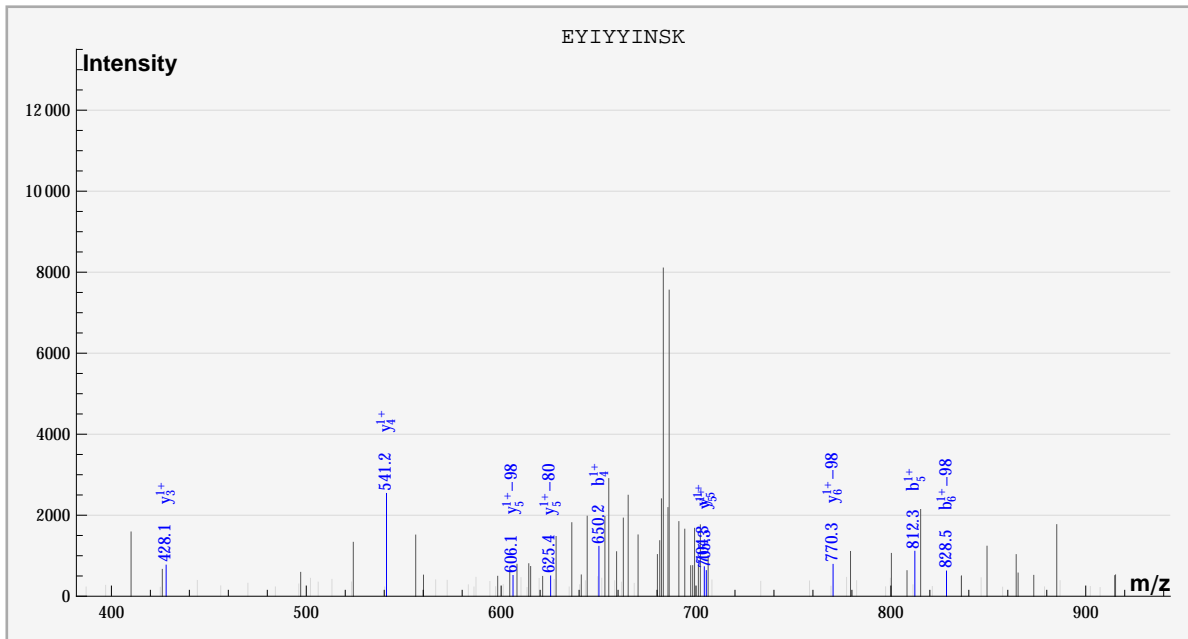

|   | # | b | b* | # | y | y* | P | P* |
|---|---|---|----|---|---|----|---|----|
| E | 1 |   |    |   |   |    |   |    |
| Y | 2 |   |    | 8 |   |    |   |    |
| I | 3 |   |    | 7 |   |    |   |    |
| Y | 4 | ✓ |    | 6 |   | ✓  |   |    |
| Y | 5 | ✓ |    | 5 | ✓ | ✓  |   |    |
| I | 6 |   | ✓  | 4 | ✓ |    |   |    |
| N | 7 |   |    | 3 | ✓ |    |   |    |
| S | 8 |   |    | 2 |   |    |   |    |
| K | 9 |   |    | 1 |   |    |   |    |

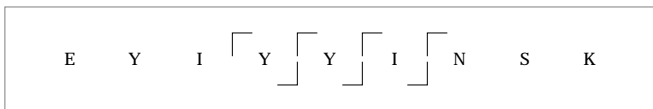



dbValid true YSTNEDYFAR PHOS(1) 2. 675. -1.74155 5.22676 100. ? 2964.  
 S\_Acido\_new%gi|68567194|gb|AAy80123.1| YSTNEDYFAR%:PHOS:.....%sample\_2%cmpd\_1487

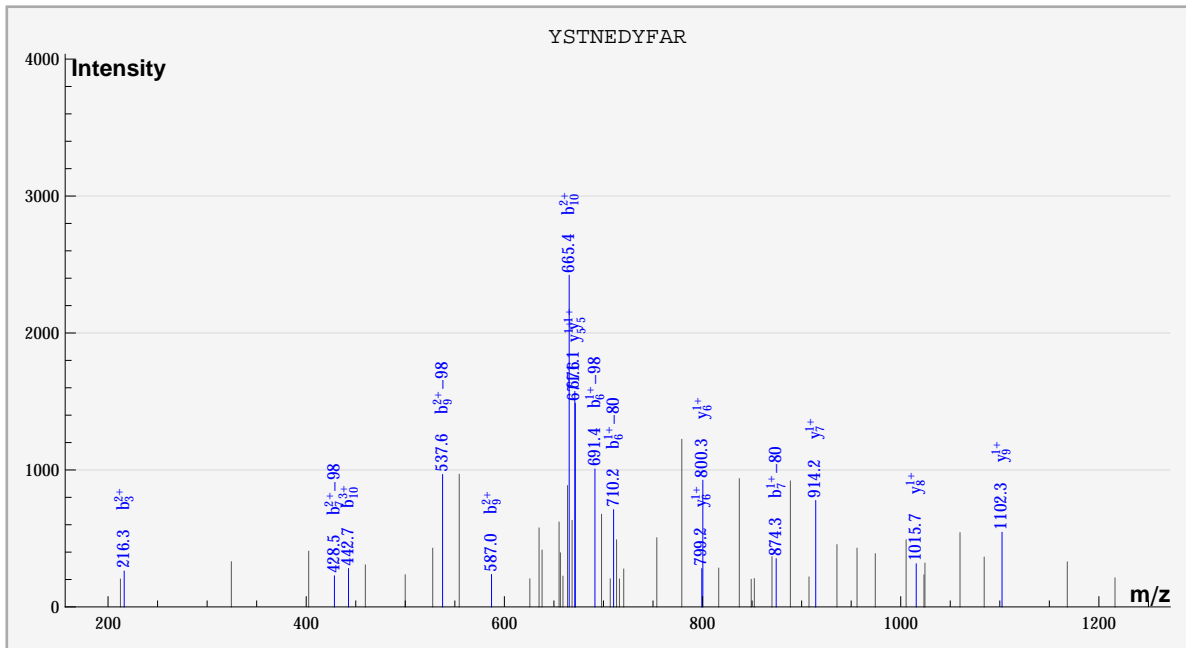

|   | #  | b | b* | # | y | y* | P | P* |
|---|----|---|----|---|---|----|---|----|
| Y | 1  |   |    |   |   |    |   |    |
| S | 2  |   |    | 9 | ✓ |    |   |    |
| T | 3  | ✓ |    | 8 | ✓ |    |   |    |
| N | 4  |   |    | 7 | ✓ |    |   |    |
| E | 5  |   |    | 6 | ✓ |    |   |    |
| D | 6  |   | ✓  | 5 | ✓ |    |   |    |
| Y | 7  |   | ✓  | 4 |   |    |   |    |
| F | 8  |   |    | 3 |   |    |   |    |
| A | 9  | ✓ | ✓  | 2 |   |    |   |    |
| R | 10 | ✓ |    | 1 |   |    |   |    |

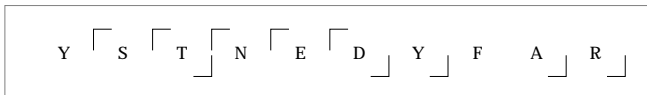

dbValid true LYDFLDSLRLK PHOS(1) 2. 676. -0.671333 5.27328 100. ? 1206.  
 S\_Acido\_new%gi|68567286|gb|AA80215.1| LYDFLDSLRLK%:::PHOS:::sample\_3%compd\_3718

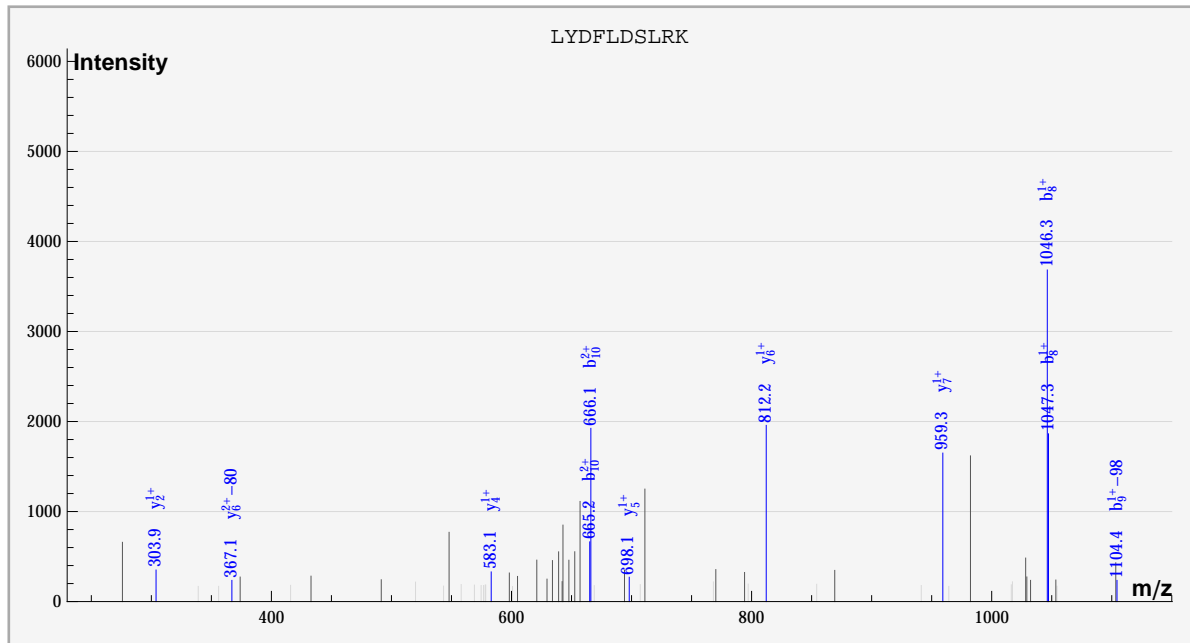

|   | #  | b | b* | # | y | y* | P | P* |
|---|----|---|----|---|---|----|---|----|
| L | 1  |   |    |   |   |    |   |    |
| Y | 2  |   |    | 9 |   |    |   |    |
| D | 3  |   |    | 8 |   |    |   |    |
| F | 4  |   |    | 7 | ✓ |    |   |    |
| L | 5  |   |    | 6 | ✓ | ✓  |   |    |
| D | 6  |   |    | 5 | ✓ |    |   |    |
| S | 7  |   |    | 4 | ✓ |    |   |    |
| L | 8  | ✓ |    | 3 |   |    |   |    |
| R | 9  |   | ✓  | 2 | ✓ |    |   |    |
| K | 10 | ✓ |    | 1 |   |    |   |    |

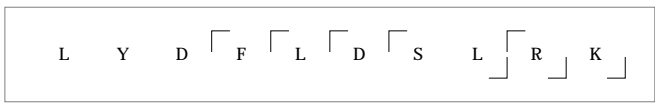

dbValid true MDVTVGIP TLGR Oxidation\_M(1),PHOS(1) 2. 676. 1.82543 5.03143 100. ? 1854.  
 S\_Acido\_new%gil68568394|gb|AAy81323.1| MDVTVGIP TLGR%:Oxidation\_M::PHOS:::sample\_0%compd\_533

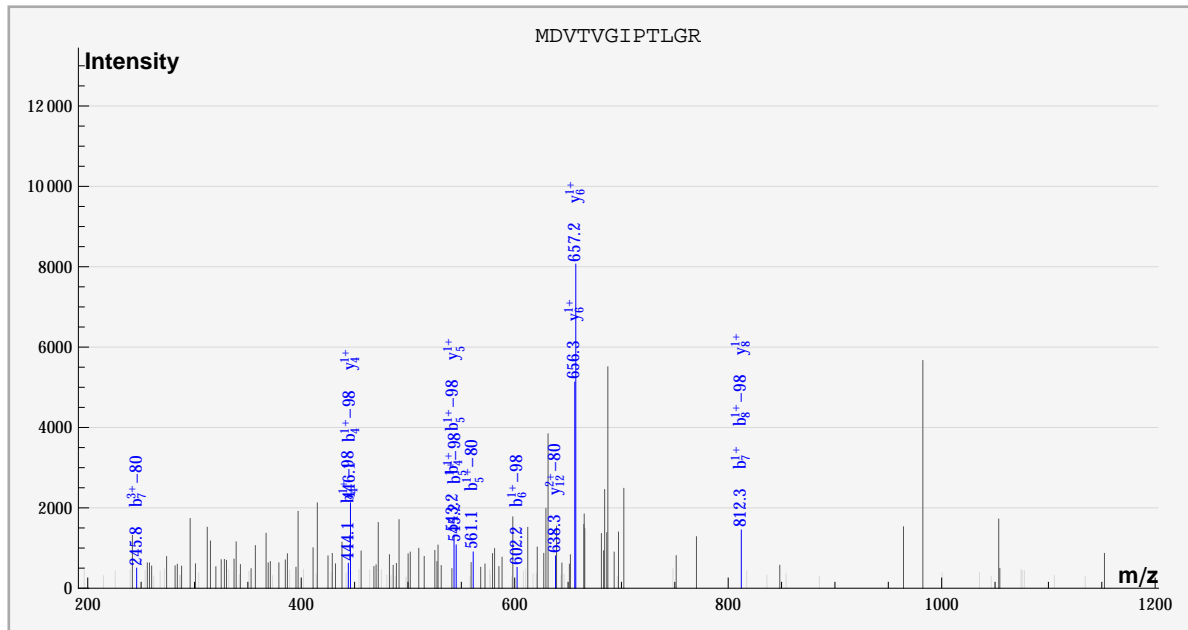

|   | #  | b | b* | #  | y | y* | P | P* |
|---|----|---|----|----|---|----|---|----|
| M | 1  |   |    |    |   |    |   | ✓  |
| D | 2  |   |    | 11 |   |    |   |    |
| V | 3  |   |    | 10 |   |    |   |    |
| T | 4  | ✓ | ✓  | 9  |   |    |   |    |
| V | 5  |   | ✓  | 8  | ✓ |    |   |    |
| G | 6  |   | ✓  | 7  |   |    |   |    |
| I | 7  | ✓ | ✓  | 6  | ✓ |    |   |    |
| P | 8  |   | ✓  | 5  | ✓ |    |   |    |
| T | 9  |   |    | 4  | ✓ |    |   |    |
| L | 10 |   |    | 3  |   |    |   |    |
| G | 11 |   |    | 2  |   |    |   |    |
| R | 12 |   |    | 1  |   |    |   |    |

MDVTVGIP TLGR

dbValid true MDVTVGIP TLGR Oxidation\_M(1),PHOS(1) 2. 676. 1.82543 5.34518 100. ? 1866.  
 S\_Acido\_new%gi|68568394|gb|AA81323.1| MDVTVGIP TLGR%:Oxidation\_M::PHOS:::sample\_0%compd\_544

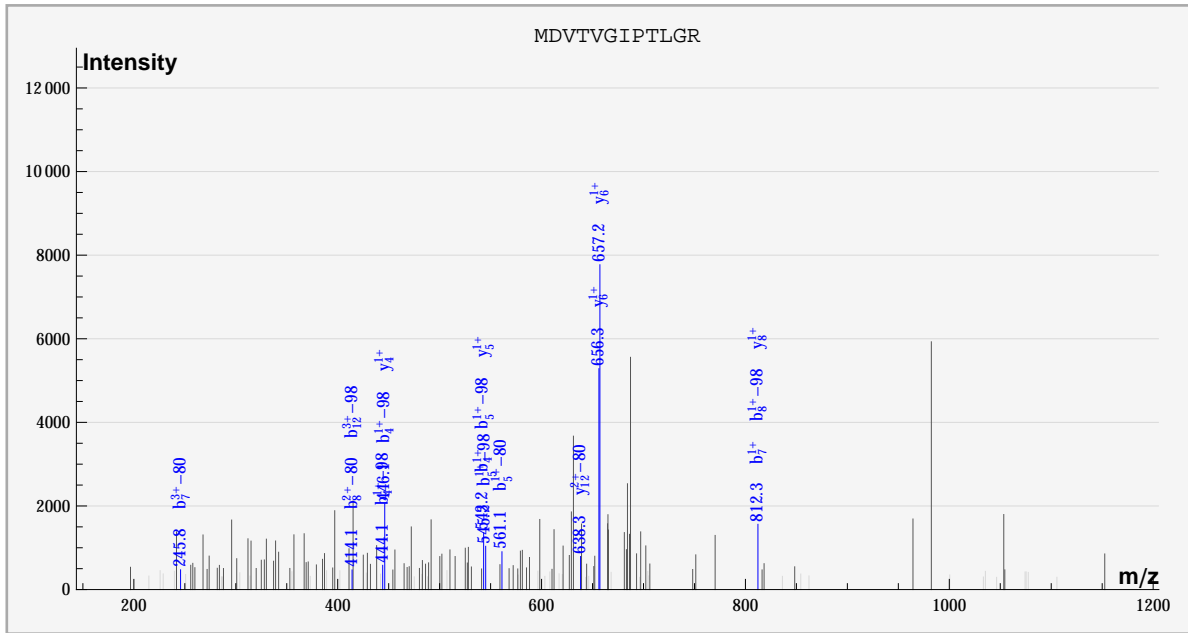

|   | #  | b | b* | #  | y | y* | P | P* |
|---|----|---|----|----|---|----|---|----|
| M | 1  |   |    |    |   |    |   | ✓  |
| D | 2  |   |    | 11 |   |    |   |    |
| V | 3  |   |    | 10 |   |    |   |    |
| T | 4  | ✓ | ✓  | 9  |   |    |   |    |
| V | 5  |   | ✓  | 8  | ✓ |    |   |    |
| G | 6  |   |    | 7  |   |    |   |    |
| I | 7  | ✓ | ✓  | 6  | ✓ |    |   |    |
| P | 8  |   | ✓  | 5  | ✓ |    |   |    |
| T | 9  |   |    | 4  | ✓ |    |   |    |
| L | 10 |   |    | 3  |   |    |   |    |
| G | 11 |   |    | 2  |   |    |   |    |
| R | 12 |   | ✓  | 1  |   |    |   |    |

MDVTVGIP TLGR

dbValid true MDVTVGIP TLGR Oxidation\_M(1),PHOS(1) 2. 676. 1.82543 5.81232 100. ? 1878.  
 S\_Acido\_new%gil68568394|gb|AAY81323.1| MDVTVGIP TLGR%:Oxidation\_M::PHOS:::sample\_0%compd\_554

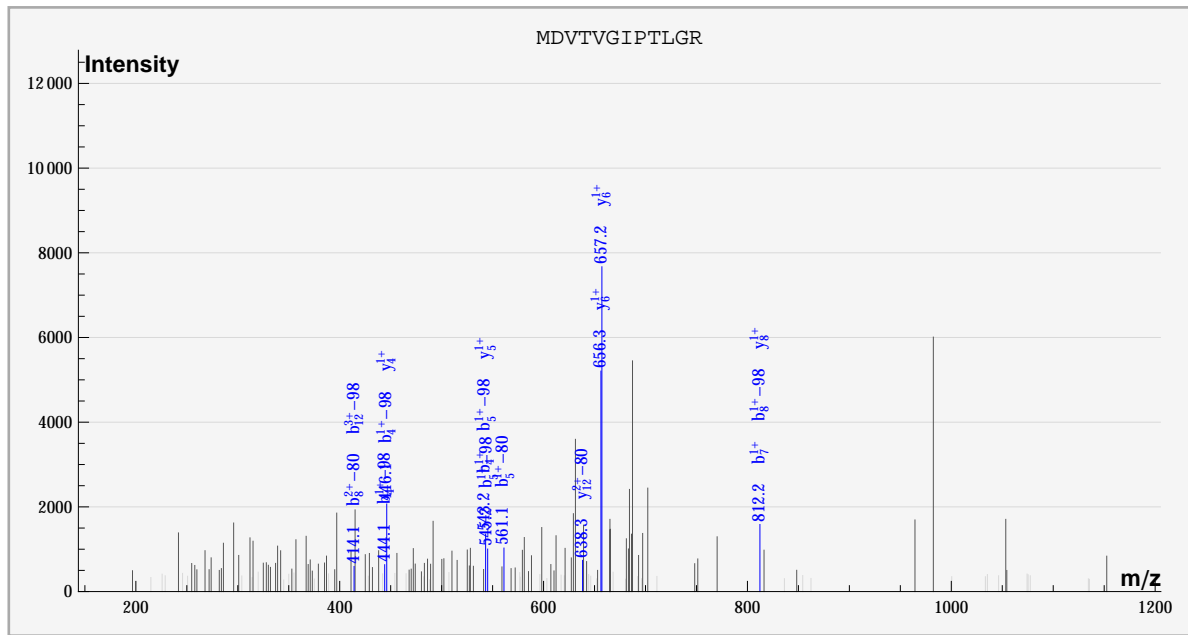

|   | #  | b | b* | #  | y | y* | P | P* |
|---|----|---|----|----|---|----|---|----|
| M | 1  |   |    |    |   |    |   | ✓  |
| D | 2  |   |    | 11 |   |    |   |    |
| V | 3  |   |    | 10 |   |    |   |    |
| T | 4  | ✓ | ✓  | 9  |   |    |   |    |
| V | 5  |   | ✓  | 8  | ✓ |    |   |    |
| G | 6  |   |    | 7  |   |    |   |    |
| I | 7  | ✓ |    | 6  | ✓ |    |   |    |
| P | 8  |   | ✓  | 5  | ✓ |    |   |    |
| T | 9  |   |    | 4  | ✓ |    |   |    |
| L | 10 |   |    | 3  |   |    |   |    |
| G | 11 |   |    | 2  |   |    |   |    |
| R | 12 |   | ✓  | 1  |   |    |   |    |

MDVTVGIP TLGR

dbValid true MDVTVGIP TLGR Oxidation\_M(1),PHOS(1) 2. 676. 1.82543 5.65584 100. ? 1890.  
 S\_Acido\_new%gil68568394|gb|AAy81323.1| MDVTVGIP TLGR%:Oxidation\_M::PHOS:::sample\_0%compd\_564

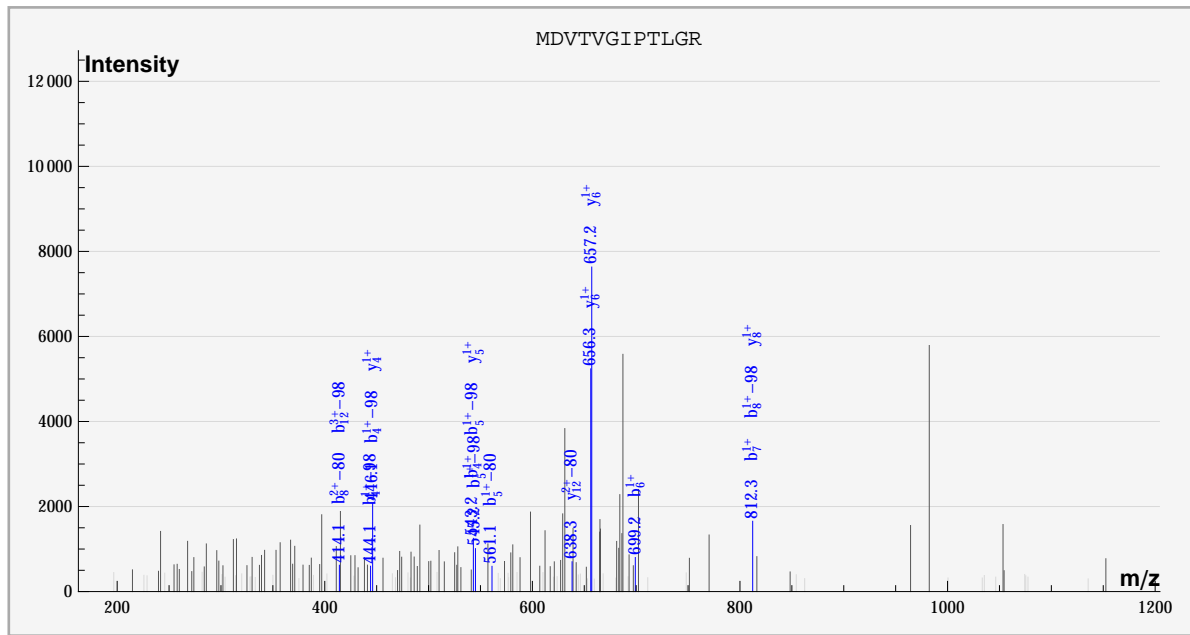

|   | #  | b | b* | #  | y | y* | P | P* |
|---|----|---|----|----|---|----|---|----|
| M | 1  |   |    |    |   |    |   | ✓  |
| D | 2  |   |    | 11 |   |    |   |    |
| V | 3  |   |    | 10 |   |    |   |    |
| T | 4  | ✓ | ✓  | 9  |   |    |   |    |
| V | 5  |   | ✓  | 8  | ✓ |    |   |    |
| G | 6  | ✓ |    | 7  |   |    |   |    |
| I | 7  | ✓ |    | 6  | ✓ |    |   |    |
| P | 8  |   | ✓  | 5  | ✓ |    |   |    |
| T | 9  |   |    | 4  | ✓ |    |   |    |
| L | 10 |   |    | 3  |   |    |   |    |
| G | 11 |   |    | 2  |   |    |   |    |
| R | 12 |   | ✓  | 1  |   |    |   |    |

MDVTVGIP TLGR

dbValid true EKYWGEEGFK PHOS(1) 2. 676. 0.781547 4.93329 100. ? 2226.  
 S\_Acido\_new%gi|68566861|gb|AA79790.1| EKYWGEEGFK%::PHOS:::::sample\_2%compd\_857

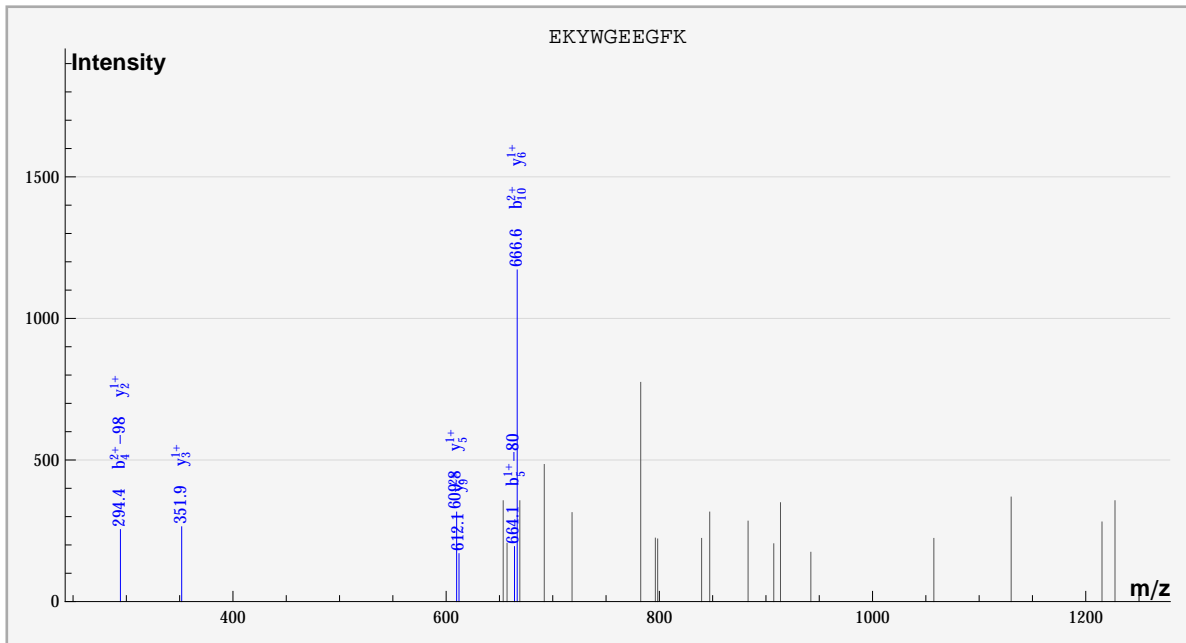

|   | #  | b | b* | # | y | y* | P | P* |
|---|----|---|----|---|---|----|---|----|
| E | 1  |   |    |   |   |    |   |    |
| K | 2  |   |    | 9 | ✓ |    |   |    |
| Y | 3  |   |    | 8 |   |    |   |    |
| W | 4  | ✓ |    | 7 |   |    |   |    |
| G | 5  | ✓ |    | 6 | ✓ |    |   |    |
| E | 6  |   |    | 5 | ✓ |    |   |    |
| E | 7  |   |    | 4 |   |    |   |    |
| G | 8  |   |    | 3 | ✓ |    |   |    |
| F | 9  |   |    | 2 | ✓ |    |   |    |
| K | 10 | ✓ |    | 1 |   |    |   |    |

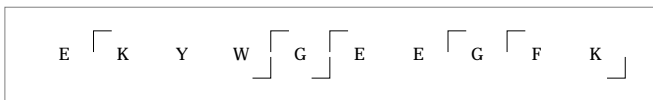

dbValid true MDVTVGIPTLGR Oxidation\_M(1),PHOS(1) 2. 676. 1.82543 5.25512 100. ? 2514.  
 S\_Acido\_new%gi|68568394|gb|AAY81323.1| MDVTVGIPTLGR%:Oxidation\_M::PHOS:::sample\_0%compd\_1106

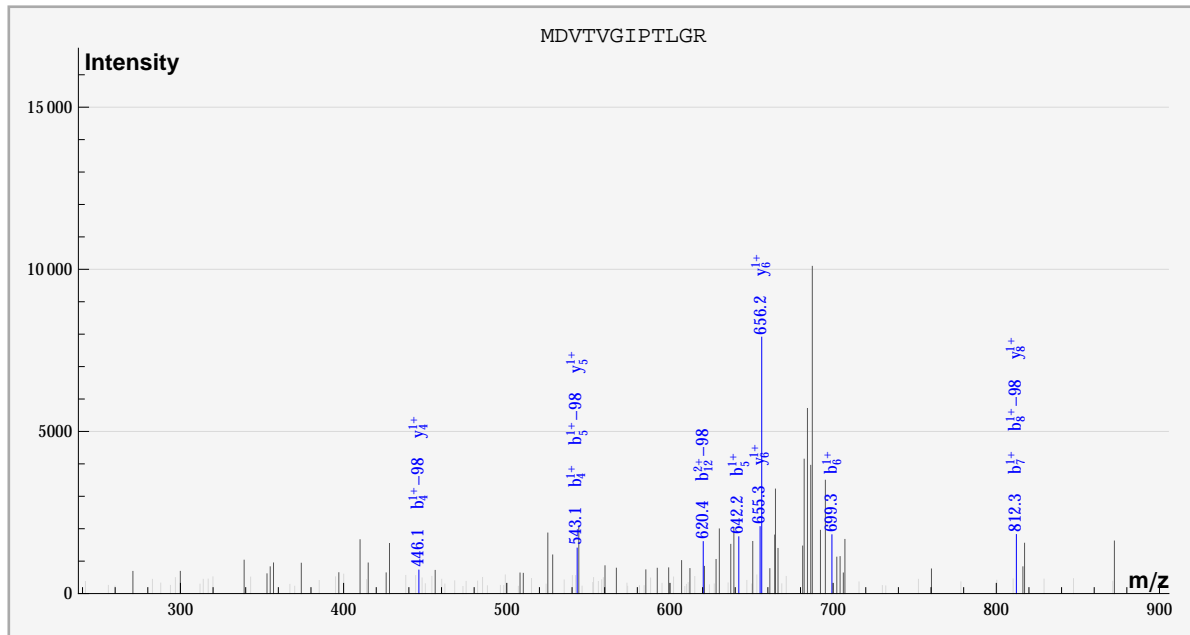

|   | #  | b | b* | #  | y | y* | P | P* |
|---|----|---|----|----|---|----|---|----|
| M | 1  |   |    |    |   |    |   |    |
| D | 2  |   |    | 11 |   |    |   |    |
| V | 3  |   |    | 10 |   |    |   |    |
| T | 4  | ✓ | ✓  | 9  |   |    |   |    |
| V | 5  | ✓ | ✓  | 8  | ✓ |    |   |    |
| G | 6  | ✓ |    | 7  |   |    |   |    |
| I | 7  | ✓ |    | 6  | ✓ |    |   |    |
| P | 8  |   | ✓  | 5  | ✓ |    |   |    |
| T | 9  |   |    | 4  | ✓ |    |   |    |
| L | 10 |   |    | 3  |   |    |   |    |
| G | 11 |   |    | 2  |   |    |   |    |
| R | 12 |   | ✓  | 1  |   |    |   |    |

M D V T V G I P T L G R



dbValid true SINVELDL DTR PHOS(1) 2. 676. 1.81612 5.17309 100. ? 2550.  
 S\_Acido\_new%gi|68568434|gb|AA81363.1| SINVELDL DTR%::::::::::PHOS::%sample\_0%compd\_1139

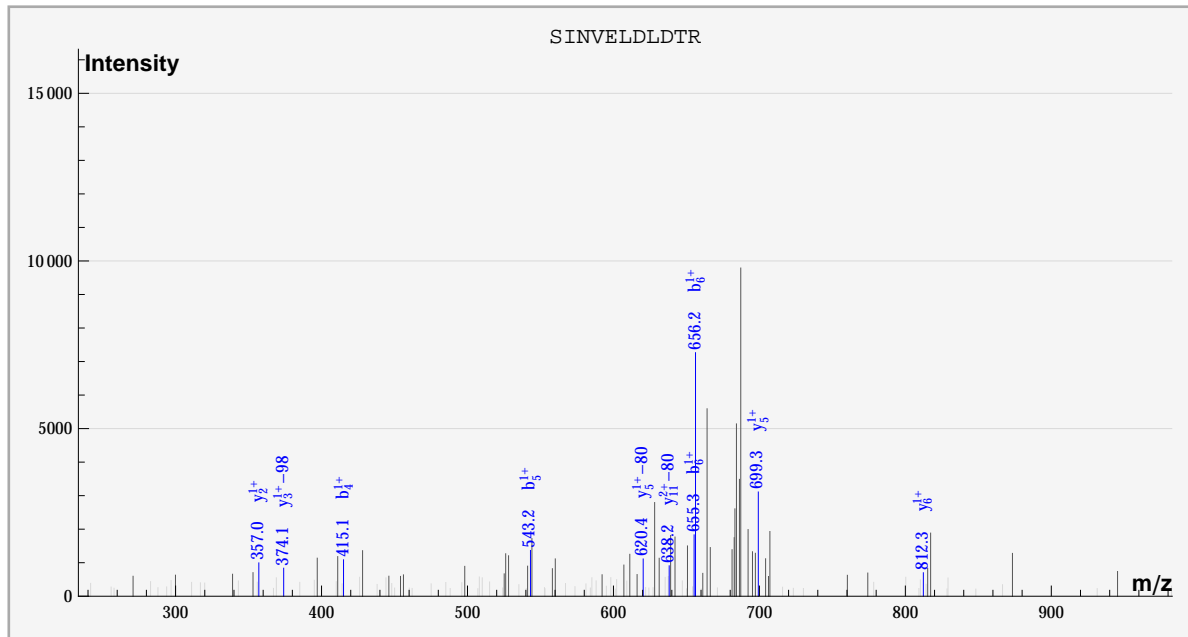

|   | #  | b | b* | #  | y | y* | P | P* |
|---|----|---|----|----|---|----|---|----|
| S | 1  |   |    |    |   |    |   | ✓  |
| I | 2  |   |    | 10 |   |    |   |    |
| N | 3  |   |    | 9  |   |    |   |    |
| V | 4  | ✓ |    | 8  |   |    |   |    |
| E | 5  | ✓ |    | 7  |   |    |   |    |
| L | 6  | ✓ |    | 6  | ✓ |    |   |    |
| D | 7  |   |    | 5  | ✓ | ✓  |   |    |
| L | 8  |   |    | 4  |   |    |   |    |
| D | 9  |   |    | 3  |   | ✓  |   |    |
| T | 10 |   |    | 2  | ✓ |    |   |    |
| R | 11 |   |    | 1  |   |    |   |    |

S I N V E L D L D T R

dbValid true EYIYYINSK PHOS(2) 2. 676. 0.764177 5.23476 100. ? 2874.

S\_Acido\_new%gi68568065|gb|AA80994.1| EYIYYINSK%::PHOS:::PHOS::%sample\_0%compd\_1418

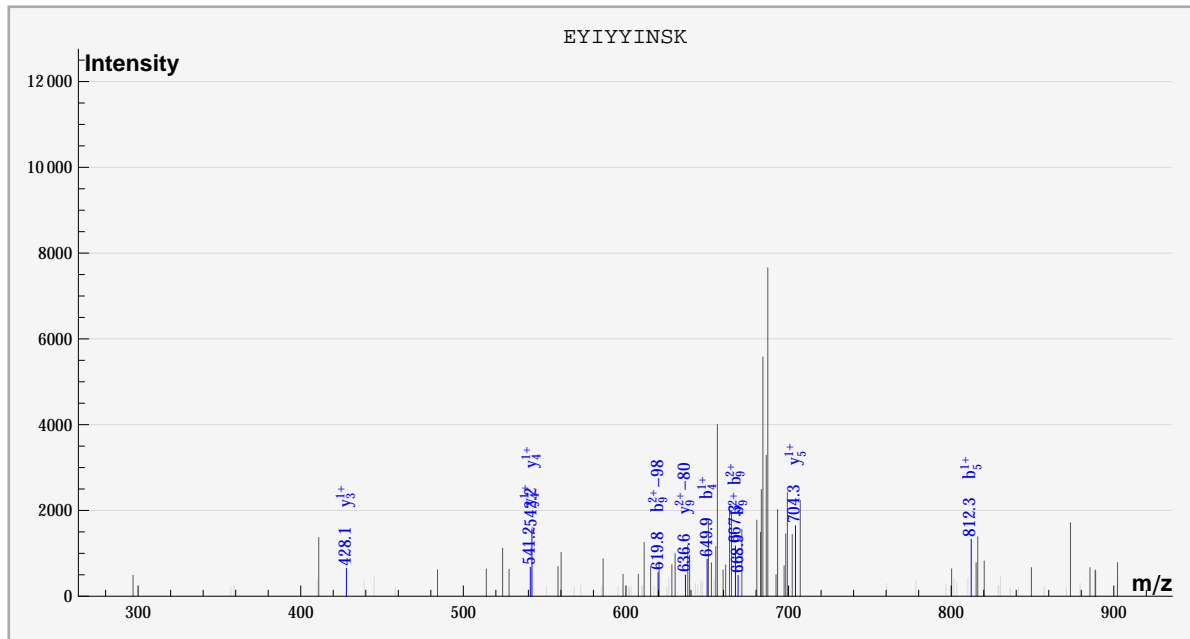

|   | # | b | b* | # | y | y* | P | P* |
|---|---|---|----|---|---|----|---|----|
| E | 1 |   |    |   |   |    |   | ✓  |
| Y | 2 |   |    | 8 |   |    |   |    |
| I | 3 |   |    | 7 |   |    |   |    |
| Y | 4 | ✓ |    | 6 |   |    |   |    |
| Y | 5 | ✓ |    | 5 | ✓ |    |   |    |
| I | 6 |   |    | 4 | ✓ |    |   |    |
| N | 7 |   |    | 3 | ✓ |    |   |    |
| S | 8 |   |    | 2 |   |    |   |    |
| K | 9 | ✓ | ✓  | 1 |   |    |   |    |

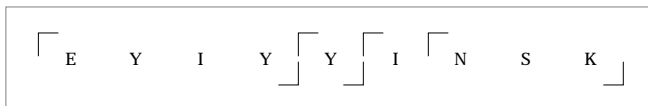

dbValid true EYIYYINSK PHOS(2) 2. 676. 0.764177 5.39352 100. ? 2910.  
 S\_Acido\_new%gi|68568065|gb|AA80994.1| EYIYYINSK%::PHOS:::PHOS::%sample\_0%compd\_1451

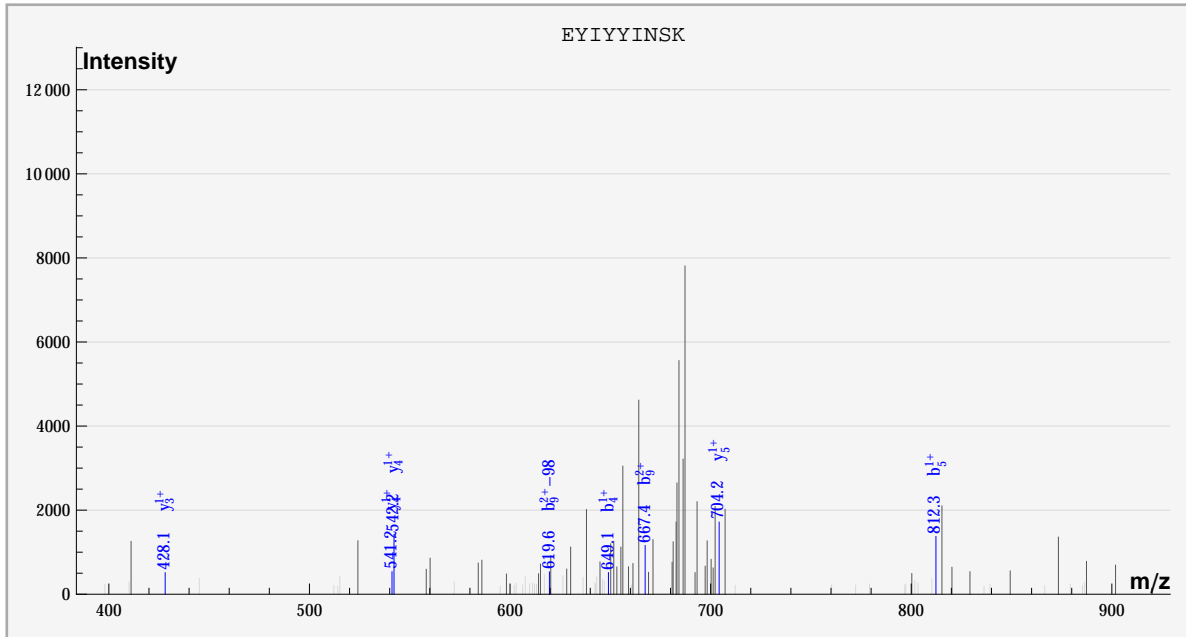

|   | # | b | b* | # | y | y* | P | P* |
|---|---|---|----|---|---|----|---|----|
| E | 1 |   |    |   |   |    |   |    |
| Y | 2 |   |    | 8 |   |    |   |    |
| I | 3 |   |    | 7 |   |    |   |    |
| Y | 4 | ✓ |    | 6 |   |    |   |    |
| Y | 5 | ✓ |    | 5 | ✓ |    |   |    |
| I | 6 |   |    | 4 | ✓ |    |   |    |
| N | 7 |   |    | 3 | ✓ |    |   |    |
| S | 8 |   |    | 2 |   |    |   |    |
| K | 9 | ✓ | ✓  | 1 |   |    |   |    |

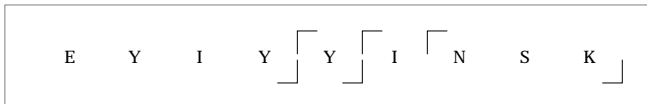



dbValid true RISGDLGSLLDK PHOS(1) 2. 676. 1.3423 5.0679 100. ? 3828.  
 S\_Acido\_new%gi|68567115|gb|AA80044.1| RISGDLGSLLDK%:::PHOS:::sample\_0%compd\_2224

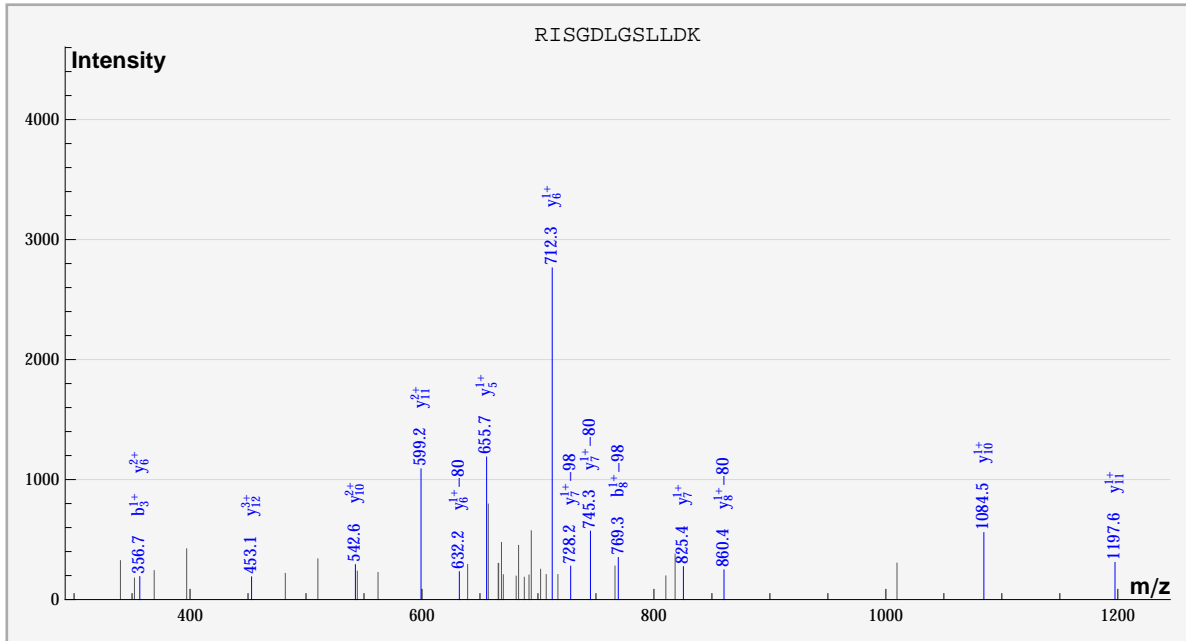

|   | #  | b | b* | #  | y | y* | P | P* |
|---|----|---|----|----|---|----|---|----|
| R | 1  |   |    |    |   |    |   | ✓  |
| I | 2  |   |    | 11 | ✓ |    |   |    |
| S | 3  | ✓ |    | 10 | ✓ |    |   |    |
| G | 4  |   |    | 9  |   |    |   |    |
| D | 5  |   |    | 8  |   | ✓  |   |    |
| L | 6  |   |    | 7  | ✓ | ✓  |   |    |
| G | 7  |   |    | 6  | ✓ | ✓  |   |    |
| S | 8  |   | ✓  | 5  | ✓ |    |   |    |
| L | 9  |   |    | 4  |   |    |   |    |
| L | 10 |   |    | 3  |   |    |   |    |
| D | 11 |   |    | 2  |   |    |   |    |
| K | 12 |   |    | 1  |   |    |   |    |

R I S G D L G S L L D K

dbValid true EKYWGEEGFK PHOS(1) 2. 677. -0.218453 4.93126 100. ? 1494.  
 S\_Acido\_new%gi|68566861|gb|AAY79790.1| EKYWGEEGFK%:::PHOS:::sample\_0%cmpd\_234

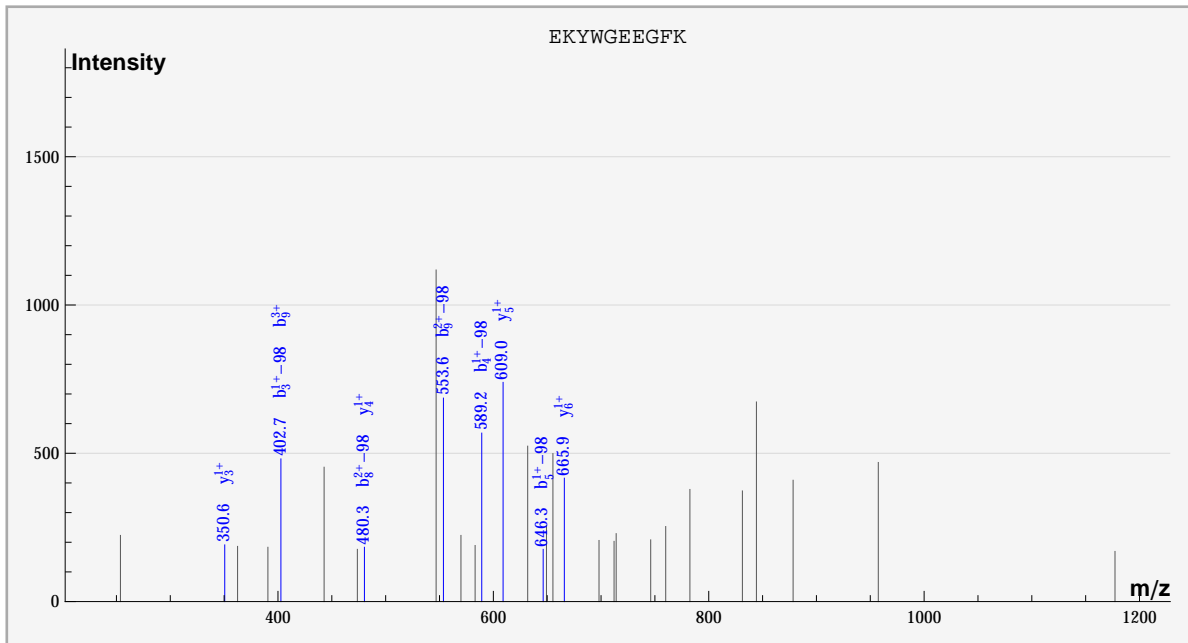

|   | #  | b | b* | # | y | y* | P | P* |
|---|----|---|----|---|---|----|---|----|
| E | 1  |   |    |   |   |    |   |    |
| K | 2  |   |    | 9 |   |    |   |    |
| Y | 3  | ✓ |    | 8 |   |    |   |    |
| W | 4  | ✓ |    | 7 |   |    |   |    |
| G | 5  | ✓ |    | 6 | ✓ |    |   |    |
| E | 6  |   |    | 5 | ✓ |    |   |    |
| E | 7  |   |    | 4 | ✓ |    |   |    |
| G | 8  |   | ✓  | 3 | ✓ |    |   |    |
| F | 9  | ✓ | ✓  | 2 |   |    |   |    |
| K | 10 |   |    | 1 |   |    |   |    |

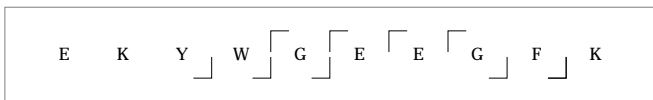

dbValid true RIAFTTLWLR PHOS(1) 2. 677. 1.86301 4.97886 100. ? 1908.

S\_Acido\_new%gi|68568658|gb|AAY81587.1| RIAFTTLWLR%:::::PHOS:::::sample\_0%compd\_607

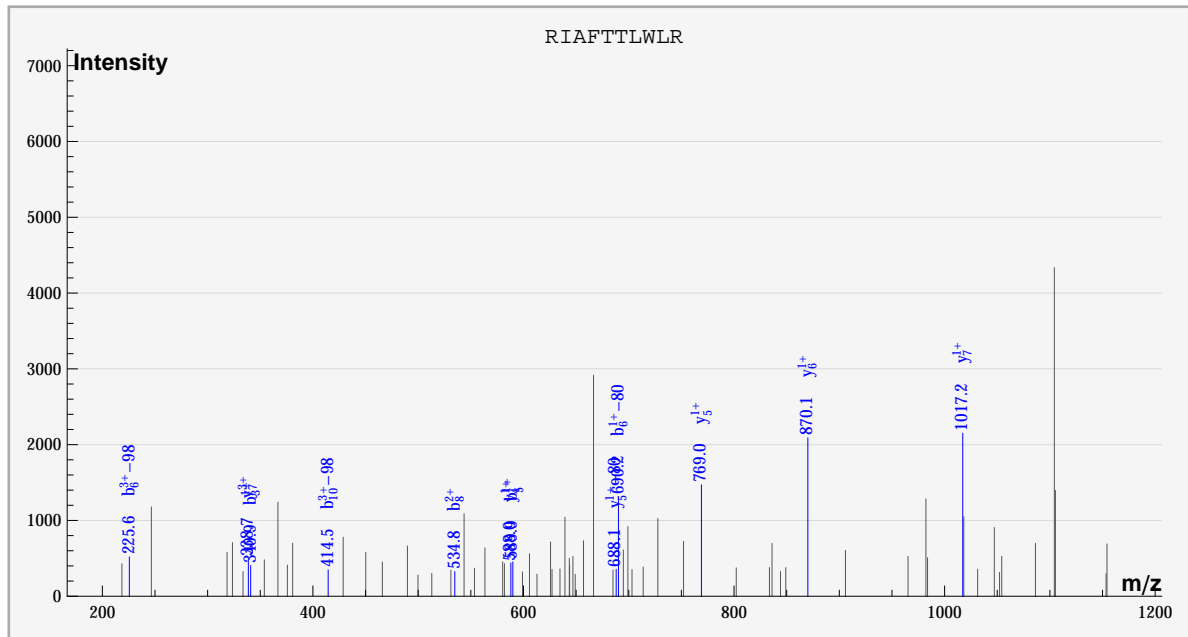

|   | #  | b | b* | # | y | y* | P | P* |
|---|----|---|----|---|---|----|---|----|
| R | 1  |   |    |   |   |    |   |    |
| I | 2  |   |    | 9 |   |    |   |    |
| A | 3  | ✓ |    | 8 |   |    |   |    |
| F | 4  |   |    | 7 | ✓ |    |   |    |
| T | 5  | ✓ |    | 6 | ✓ |    |   |    |
| T | 6  |   | ✓  | 5 | ✓ | ✓  |   |    |
| L | 7  |   |    | 4 | ✓ |    |   |    |
| W | 8  | ✓ |    | 3 |   |    |   |    |
| L | 9  |   |    | 2 |   |    |   |    |
| R | 10 |   | ✓  | 1 |   |    |   |    |

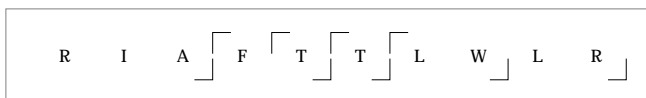

dbValid true MSIIGAPRSSR Oxidation\_M(1),PHOS(2) 2. 677. -1.21456 5.02799 100. ? 2394.  
 S\_Acido\_new%gil68568073|gb|AAY81002.1| MSIIGAPRSSR%:Oxidation\_M:PHOS:::PHOS:::sample\_0%compd\_1003

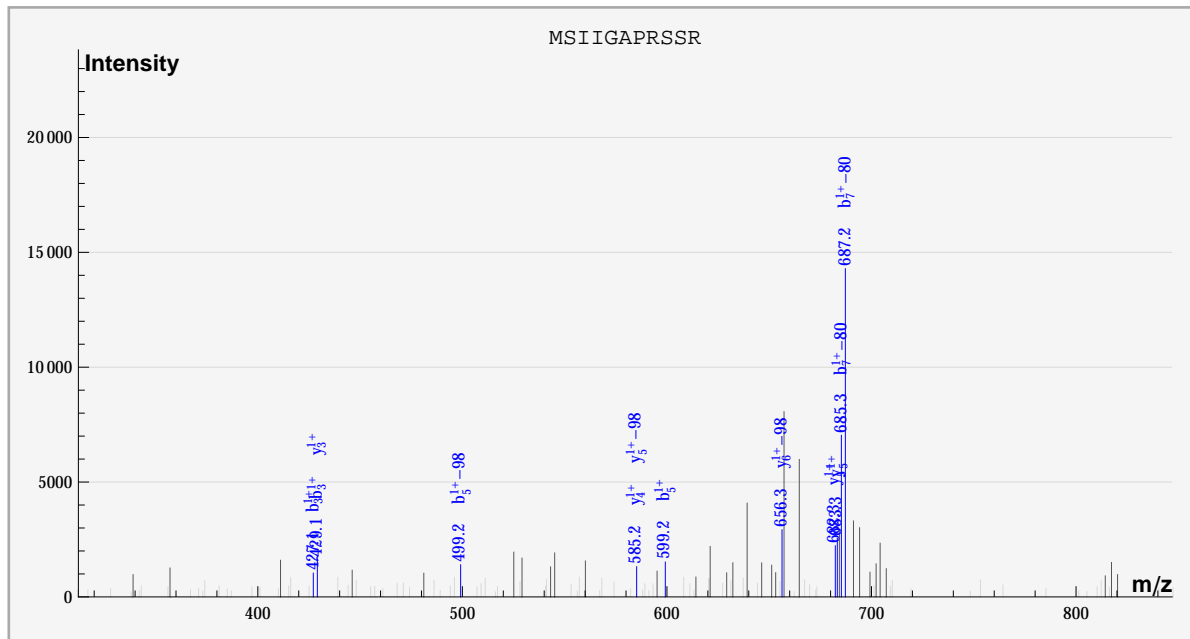

|   | #  | b | b* | #  | y | y* | P | P* |
|---|----|---|----|----|---|----|---|----|
| M | 1  |   |    |    |   |    |   |    |
| S | 2  |   |    | 10 |   |    |   |    |
| I | 3  | ✓ |    | 9  |   |    |   |    |
| I | 4  |   |    | 8  |   |    |   |    |
| G | 5  | ✓ | ✓  | 7  |   |    |   |    |
| A | 6  |   |    | 6  |   | ✓  |   |    |
| P | 7  |   | ✓  | 5  | ✓ | ✓  |   |    |
| R | 8  |   |    | 4  | ✓ |    |   |    |
| S | 9  |   |    | 3  | ✓ |    |   |    |
| S | 10 |   |    | 2  |   |    |   |    |
| R | 11 |   |    | 1  |   |    |   |    |

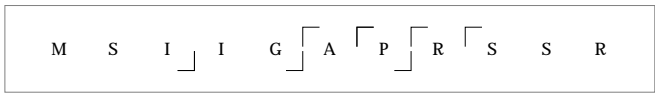



dbValid true NSQQSIGQSISK PHOS(1) 2. 677. 1.81138 5.18948 100. ? 2706.  
 S\_Acido\_new%gil68568657|gb|AAY81586.1| NSQQSIGQSISK%:::PHOS:::%sample\_0%compd\_1337

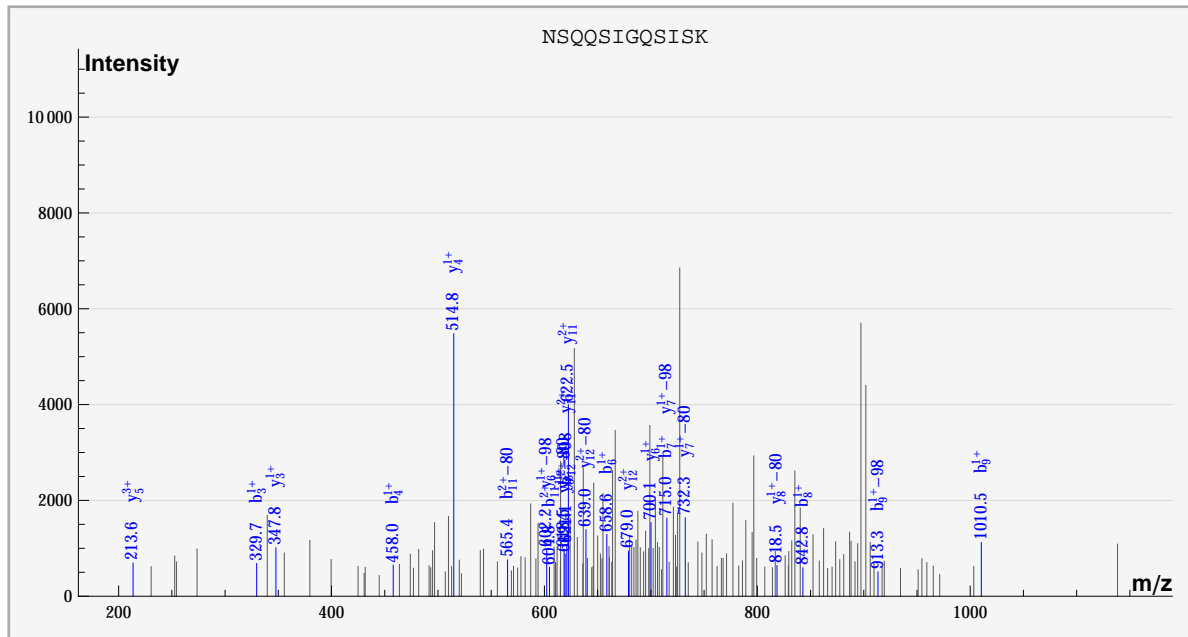

|   | #  | b | b* | #  | y | y* | P | P* |
|---|----|---|----|----|---|----|---|----|
| N | 1  |   |    |    |   |    | ✓ | ✓  |
| S | 2  |   |    | 11 | ✓ |    |   |    |
| Q | 3  | ✓ |    | 10 |   |    |   |    |
| Q | 4  | ✓ |    | 9  |   |    |   |    |
| S | 5  |   |    | 8  |   | ✓  |   |    |
| I | 6  | ✓ |    | 7  |   | ✓  |   |    |
| G | 7  | ✓ |    | 6  | ✓ | ✓  |   |    |
| Q | 8  | ✓ |    | 5  | ✓ |    |   |    |
| S | 9  | ✓ | ✓  | 4  | ✓ |    |   |    |
| I | 10 |   |    | 3  | ✓ |    |   |    |
| S | 11 | ✓ | ✓  | 2  |   |    |   |    |
| K | 12 |   | ✓  | 1  |   |    |   |    |

[ N ] [ S ] [ Q ] [ Q ] [ S ] [ I ] [ G ] [ Q ] [ S ] [ I ] [ S ] [ K ]

dbValid true SNDIGIVPLVSR PHOS(1) 2. 677. -1.65515 5.00826 100. ? 2790.  
 S\_Acido\_new%gil68568558|gb|AAy81487.1| SNDIGIVPLVSR%:PHOS:.....:sample\_0%cmpd\_1414

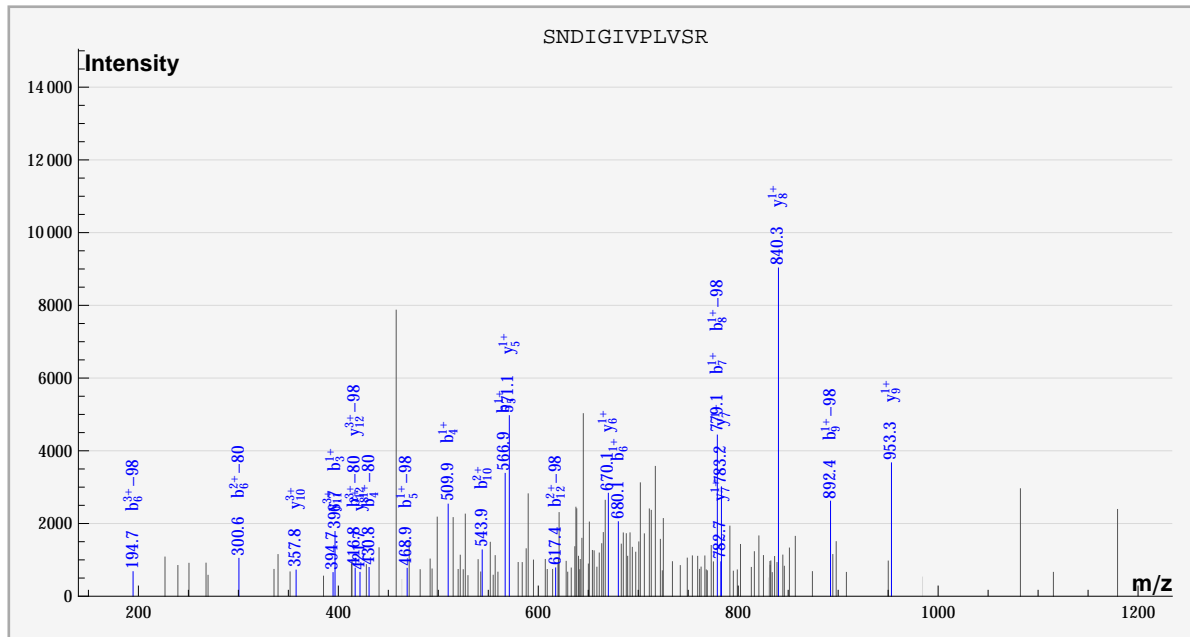

|   | #  | b | b* | #  | y | y* | P | P* |
|---|----|---|----|----|---|----|---|----|
| S | 1  |   |    |    |   |    |   | ✓  |
| N | 2  |   |    | 11 |   | ✓  |   |    |
| D | 3  | ✓ |    | 10 |   | ✓  |   |    |
| I | 4  | ✓ | ✓  | 9  |   | ✓  |   |    |
| G | 5  | ✓ | ✓  | 8  |   | ✓  |   |    |
| I | 6  | ✓ | ✓  | 7  |   | ✓  |   |    |
| V | 7  | ✓ |    | 6  |   | ✓  |   |    |
| P | 8  |   | ✓  | 5  |   | ✓  |   |    |
| L | 9  |   | ✓  | 4  |   |    |   |    |
| V | 10 | ✓ |    | 3  |   |    |   |    |
| S | 11 |   |    | 2  |   |    |   |    |
| R | 12 |   | ✓  | 1  |   |    |   |    |

[ S ] [ N ] [ D ] [ I ] [ G ] [ I ] [ V ] [ P ] [ L ] [ V ] [ S ] [ R ]

dbValid true SNDIGIVPLVSR PHOS(1) 2. 677. -1.65515 6.25178 100. ? 2802.  
 S\_Acido\_new%gi|68568558|gb|AAy81487.1| SNDIGIVPLVSR%:PHOS:.....:sample\_0%compd\_1426

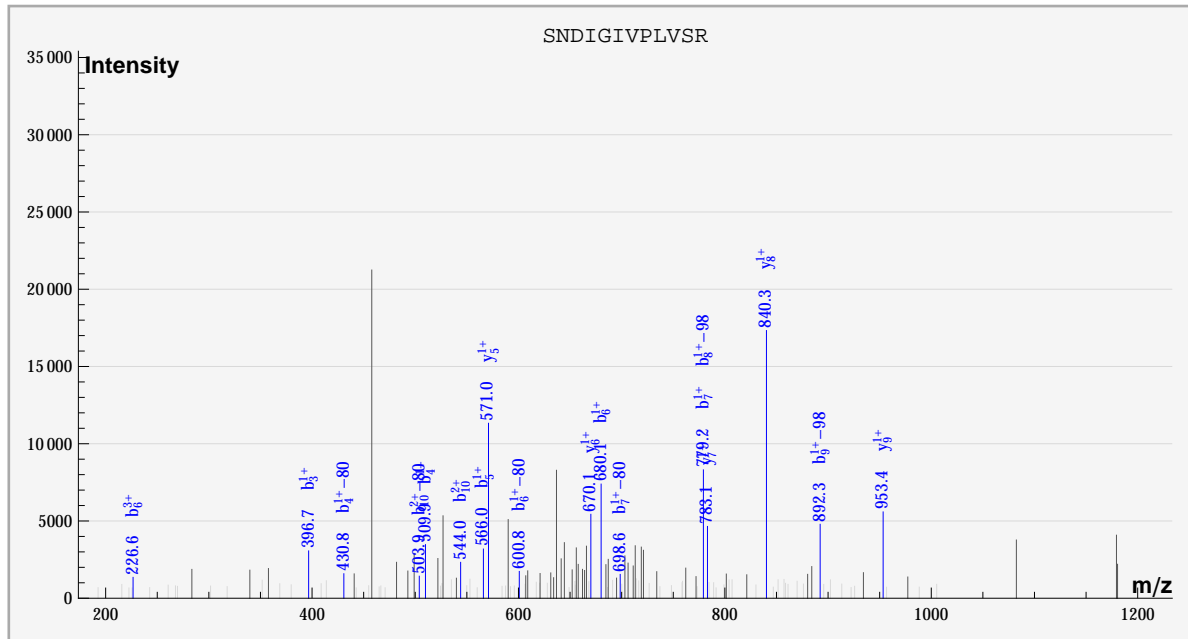

|   | #  | b | b* | #  | y | y* | P | P* |
|---|----|---|----|----|---|----|---|----|
| S | 1  |   |    |    |   |    |   |    |
| N | 2  |   |    | 11 |   |    |   |    |
| D | 3  | ✓ |    | 10 |   |    |   |    |
| I | 4  | ✓ | ✓  | 9  | ✓ |    |   |    |
| G | 5  | ✓ |    | 8  | ✓ |    |   |    |
| I | 6  | ✓ | ✓  | 7  | ✓ |    |   |    |
| V | 7  | ✓ | ✓  | 6  | ✓ |    |   |    |
| P | 8  |   | ✓  | 5  | ✓ |    |   |    |
| L | 9  |   | ✓  | 4  |   |    |   |    |
| V | 10 | ✓ | ✓  | 3  |   |    |   |    |
| S | 11 |   |    | 2  |   |    |   |    |
| R | 12 |   |    | 1  |   |    |   |    |

S N D I G I V P L V S R

dbValid true SNDIGIVPLVSR PHOS(1) 2. 677. -1.65515 6.38927 100. ? 2814.  
 S\_Acido\_new%gi|68568558|gb|AAY81487.1| SNDIGIVPLVSR%:PHOS:.....:sample\_0%cmpd\_1436

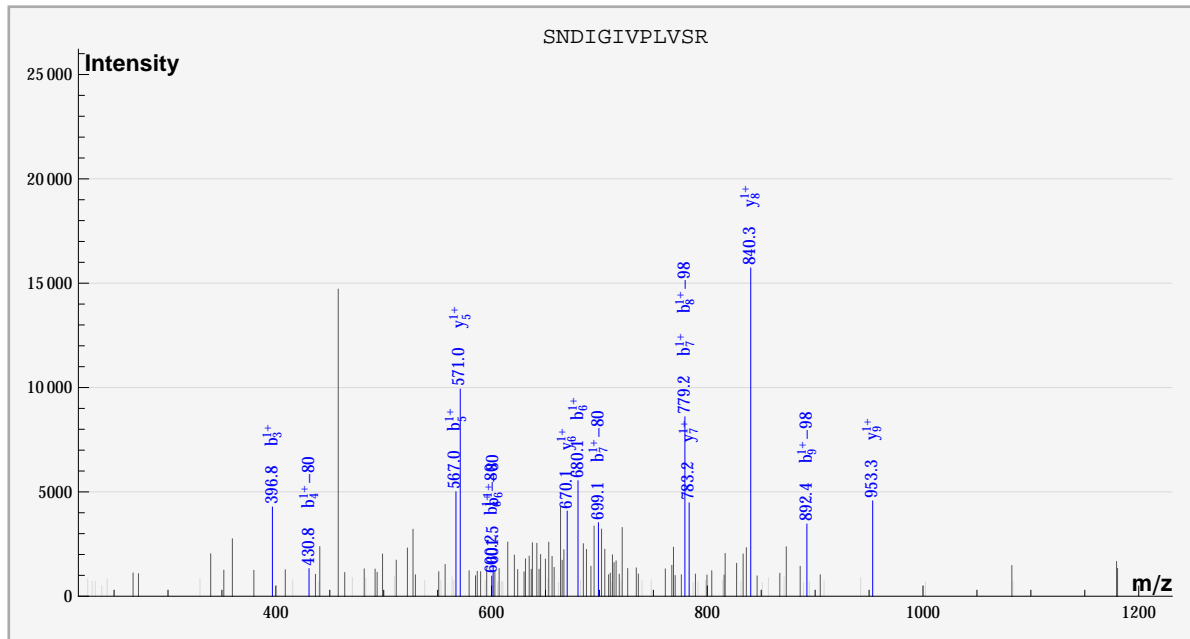

|   | #  | b | b* | #  | y | y* | P | P* |
|---|----|---|----|----|---|----|---|----|
| S | 1  |   |    |    |   |    |   |    |
| N | 2  |   |    | 11 |   |    |   |    |
| D | 3  | ✓ |    | 10 |   |    |   |    |
| I | 4  |   | ✓  | 9  | ✓ |    |   |    |
| G | 5  | ✓ |    | 8  | ✓ |    |   |    |
| I | 6  | ✓ | ✓  | 7  | ✓ |    |   |    |
| V | 7  | ✓ | ✓  | 6  | ✓ |    |   |    |
| P | 8  |   | ✓  | 5  | ✓ |    |   |    |
| L | 9  |   | ✓  | 4  |   |    |   |    |
| V | 10 |   |    | 3  |   |    |   |    |
| S | 11 |   |    | 2  |   |    |   |    |
| R | 12 |   |    | 1  |   |    |   |    |

S N D I G I V P L V S R

dbValid true IIEKSGSEGRAK PHOS(1) 2. 677. 0.839927 5.582 100. ? 2922.  
 S\_Acido\_new%gil68567998|gb|AAY80927.1| IIEKSGSEGRAK%:::PHOS:::sample\_0%compd\_1536

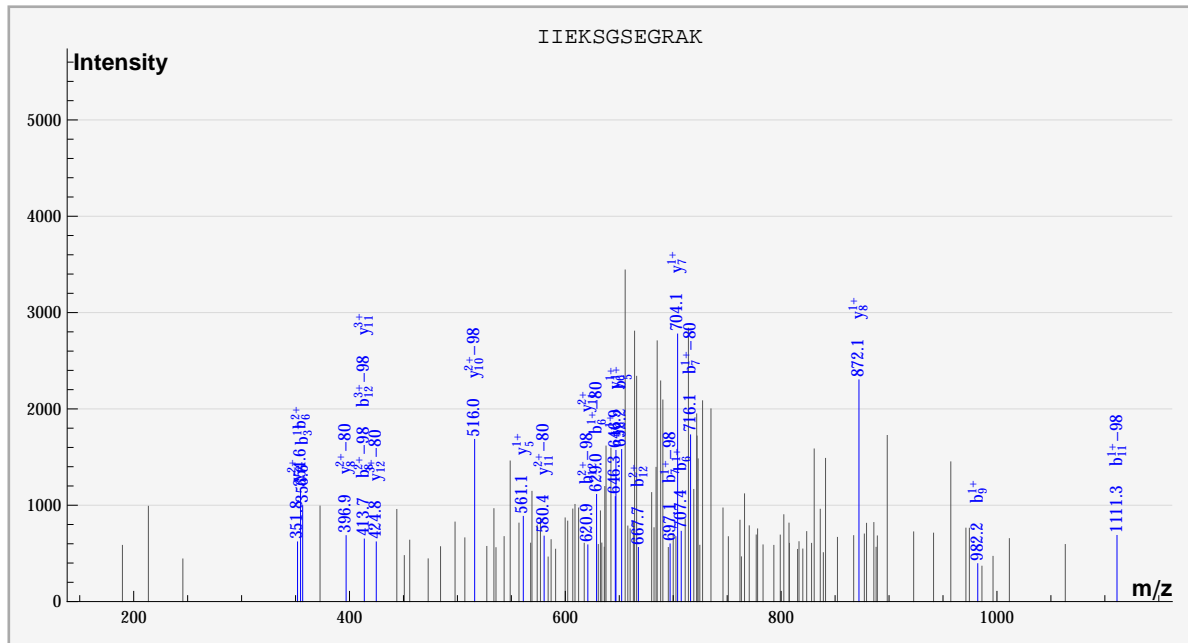

|   | #  | b | b* | #  | y | y* | P | P* |
|---|----|---|----|----|---|----|---|----|
| I | 1  |   |    |    |   |    |   | ✓  |
| I | 2  |   |    | 11 | ✓ | ✓  |   |    |
| E | 3  | ✓ |    | 10 |   | ✓  |   |    |
| K | 4  |   |    | 9  |   |    |   |    |
| S | 5  | ✓ |    | 8  | ✓ | ✓  |   |    |
| G | 6  | ✓ | ✓  | 7  | ✓ |    |   |    |
| S | 7  |   | ✓  | 6  | ✓ |    |   |    |
| E | 8  |   | ✓  | 5  | ✓ |    |   |    |
| G | 9  | ✓ |    | 4  |   |    |   |    |
| R | 10 |   |    | 3  |   |    |   |    |
| A | 11 |   | ✓  | 2  |   |    |   |    |
| K | 12 | ✓ | ✓  | 1  |   |    |   |    |

I I E K S G S E G R A K

dbValid true HPMSYGYTR PHOS(3) 2. 677. -0.797433 5.20917 100. ? 3684.  
 S\_Acido\_new%gi|68567947|gb|AA80876.1| HPMSYGYTR%:::PHOS:PHOS:PHOS::%sample\_0%compd\_2234

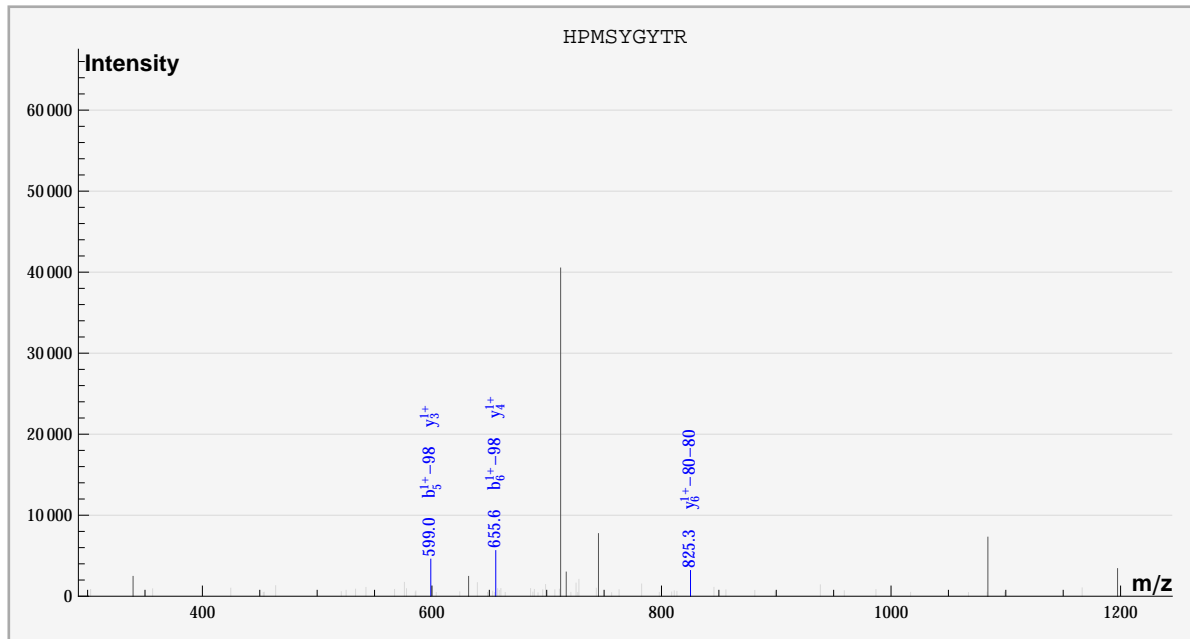

|   | # | b | b* | # | y | y* | P | P* |
|---|---|---|----|---|---|----|---|----|
| H | 1 |   |    |   |   |    |   |    |
| P | 2 |   |    | 8 |   |    |   |    |
| M | 3 |   |    | 7 |   |    |   |    |
| S | 4 |   |    | 6 |   | ✓  |   |    |
| Y | 5 | ✓ |    | 5 |   |    |   |    |
| G | 6 | ✓ |    | 4 | ✓ |    |   |    |
| Y | 7 |   |    | 3 | ✓ |    |   |    |
| T | 8 |   |    | 2 |   |    |   |    |
| R | 9 |   |    | 1 |   |    |   |    |

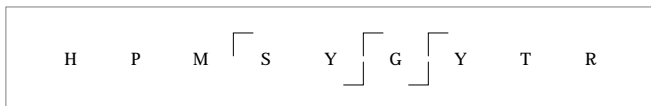

dbValid true RISGDLGSLLDK PHOS(1) 2. 678. -0.657698 5.08761 100. ? 1764.  
 S\_Acido\_new%gi|68567115|gb|AA80044.1| RISGDLGSLLDK%:::PHOS:::%sample\_0%compd\_476

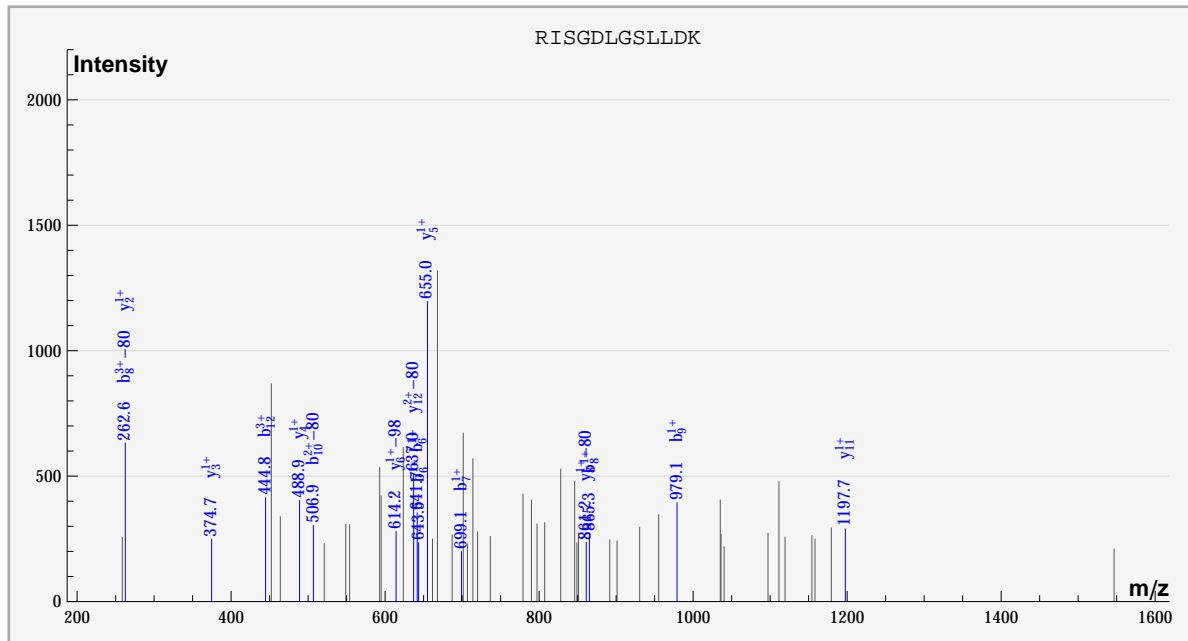

|   | #  | b | b* | #  | y | y* | P | P* |
|---|----|---|----|----|---|----|---|----|
| R | 1  |   |    |    |   |    |   | ✓  |
| I | 2  |   |    | 11 | ✓ |    |   |    |
| S | 3  |   |    | 10 |   |    |   |    |
| G | 4  |   |    | 9  |   |    |   |    |
| D | 5  |   |    | 8  |   | ✓  |   |    |
| L | 6  | ✓ |    | 7  |   |    |   |    |
| G | 7  | ✓ |    | 6  |   | ✓  |   |    |
| S | 8  | ✓ | ✓  | 5  | ✓ |    |   |    |
| L | 9  | ✓ |    | 4  | ✓ |    |   |    |
| L | 10 |   | ✓  | 3  | ✓ |    |   |    |
| D | 11 |   |    | 2  | ✓ |    |   |    |
| K | 12 | ✓ |    | 1  |   |    |   |    |

R I S G D L G S L L D K

dbValid true KSSILTEER PHOS(2) 2. 678. -1.71928 5.03704 100. ? 1848.  
 S\_Acido\_new%gii68566702|gb|AAY79631.1| KSSILTEER%::PHOS:PHOS:.....%sample\_0%compd\_553

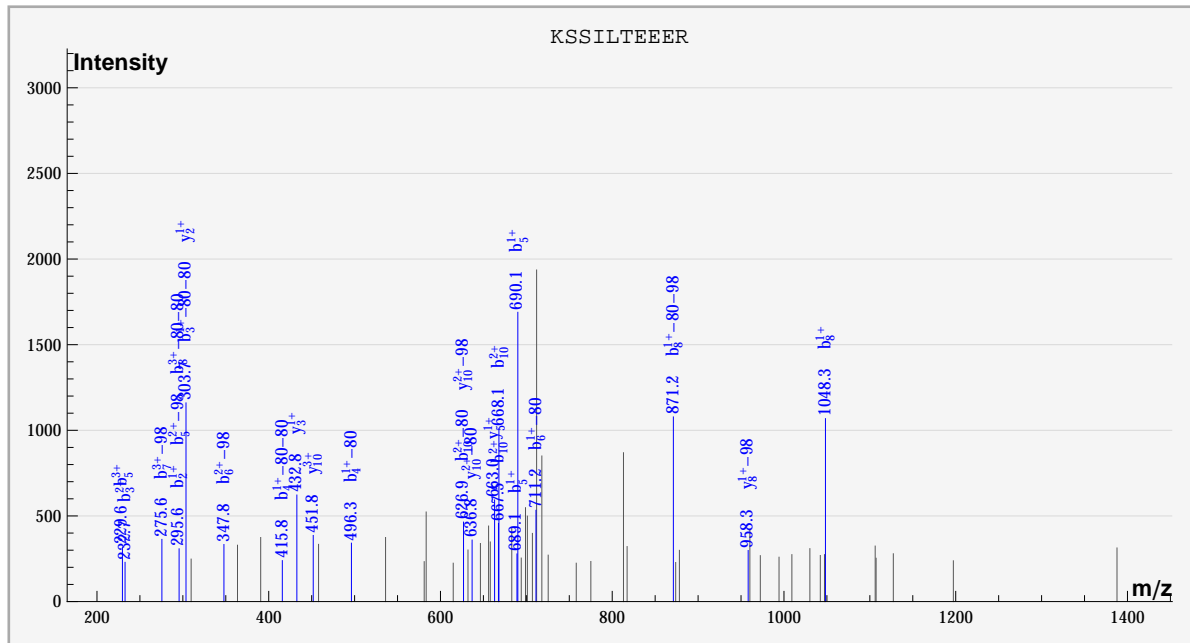

|   | #  | b | b* | # | y | y* | P | P* |
|---|----|---|----|---|---|----|---|----|
| K | 1  |   |    |   |   |    | ✓ | ✓  |
| S | 2  | ✓ |    | 9 |   |    |   |    |
| S | 3  | ✓ | ✓  | 8 |   | ✓  |   |    |
| I | 4  |   | ✓  | 7 |   |    |   |    |
| L | 5  | ✓ | ✓  | 6 |   |    |   |    |
| T | 6  |   | ✓  | 5 |   | ✓  |   |    |
| E | 7  |   | ✓  | 4 |   |    |   |    |
| E | 8  | ✓ | ✓  | 3 |   | ✓  |   |    |
| E | 9  |   |    | 2 |   | ✓  |   |    |
| R | 10 | ✓ | ✓  | 1 |   |    |   |    |

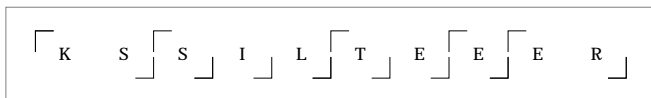



dbValid true NYSQLEDTVK PHOS(2) 2. 678. 0.759622 5.08639 100. ? 2970.  
 S\_Acido\_new%gi|68568081|gb|AAY81010.1| NYSQLEDTVK%::PHOS:::PHOS:::sample\_2%compd\_1490

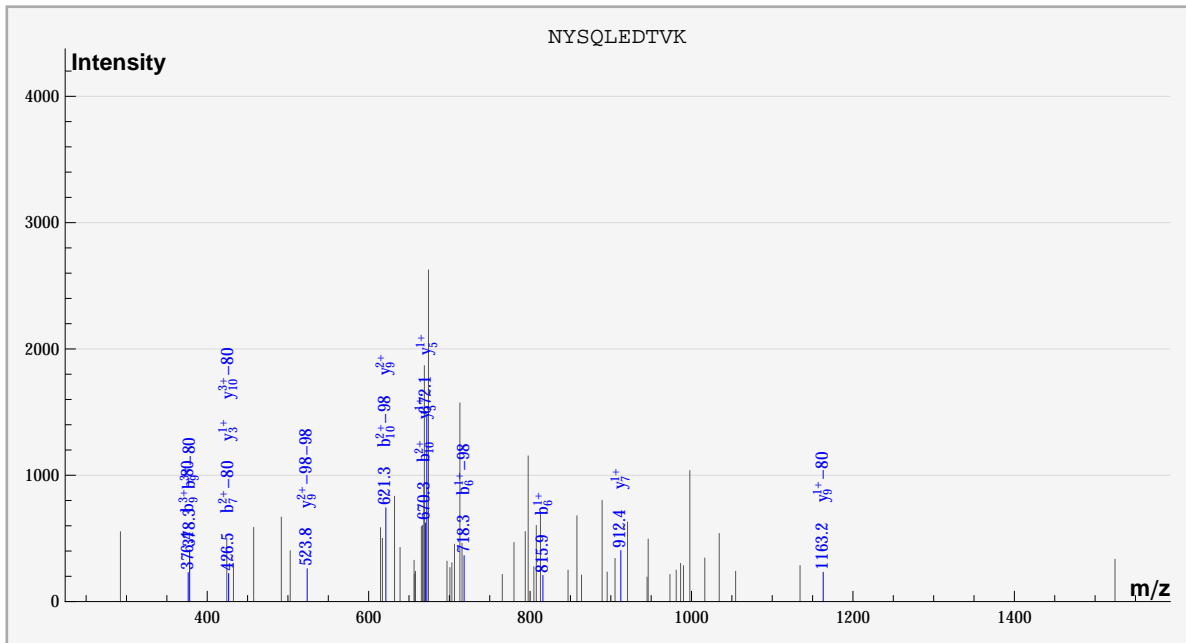

|   | #  | b | b* | # | y | y* | P | P* |
|---|----|---|----|---|---|----|---|----|
| N | 1  |   |    |   |   |    |   | ✓  |
| Y | 2  |   |    | 9 | ✓ | ✓  |   |    |
| S | 3  |   |    | 8 |   |    |   |    |
| Q | 4  |   |    | 7 | ✓ |    |   |    |
| L | 5  |   |    | 6 |   |    |   |    |
| E | 6  | ✓ | ✓  | 5 | ✓ |    |   |    |
| D | 7  |   | ✓  | 4 |   |    |   |    |
| T | 8  |   |    | 3 | ✓ |    |   |    |
| V | 9  |   | ✓  | 2 |   |    |   |    |
| K | 10 | ✓ | ✓  | 1 |   |    |   |    |

┌ N ┌ Y S ┌ Q L ┌ E ┌ D ┌ T V ┌ K ┌

dbValid true GPPLSK PHOS(1) 1. 678. 0.322185 5.72134 100. ? 3084.  
 S\_Acido\_new%gi|68567821|gb|AAY80750.1| GPPLSK%::::PHOS:::sample\_0%compd\_1680

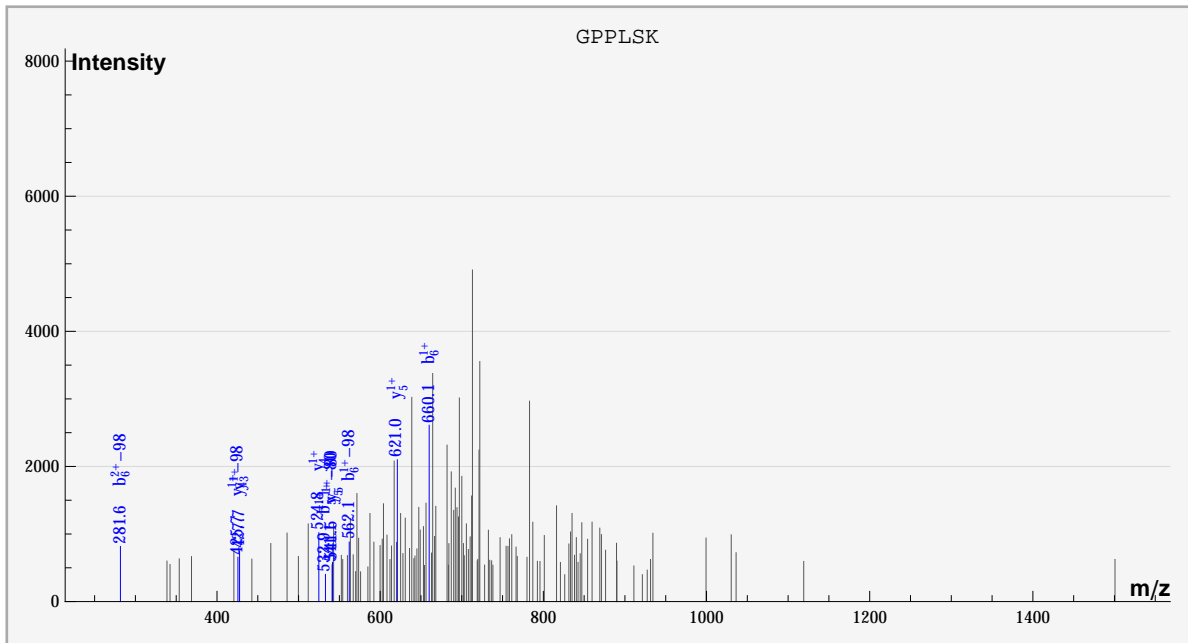

|   | # | b | b* | # | y | y* | P | P* |
|---|---|---|----|---|---|----|---|----|
| G | 1 |   |    |   |   |    |   |    |
| P | 2 |   |    | 5 | ✓ | ✓  |   |    |
| P | 3 |   |    | 4 | ✓ | ✓  |   |    |
| L | 4 |   |    | 3 | ✓ |    |   |    |
| S | 5 | ✓ |    | 2 |   |    |   |    |
| K | 6 | ✓ | ✓  | 1 |   |    |   |    |

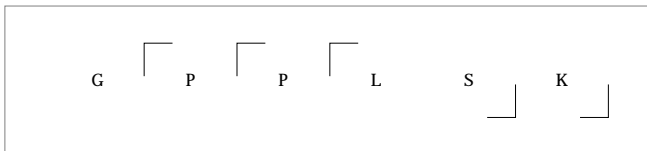

dbValid true NSQQSIGQSISK PHOS(1) 2. 679. -0.188618 5.16605 100. ? 2586.  
 S\_Acido\_new%gil68568657|gb|AAY81586.1| NSQQSIGQSISK%:.....:PHOS::%sample\_0%compd\_1229

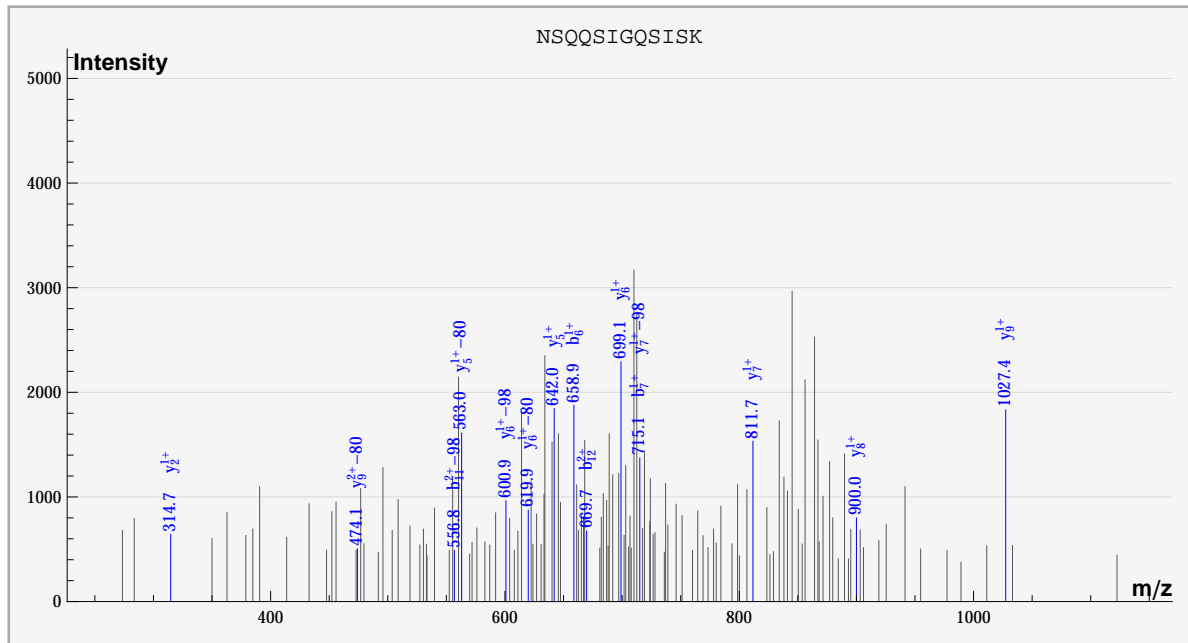

|   | #  | b | b* | #  | y | y* | P | P* |
|---|----|---|----|----|---|----|---|----|
| N | 1  |   |    |    |   |    |   |    |
| S | 2  |   |    | 11 |   |    |   |    |
| Q | 3  |   |    | 10 |   |    |   |    |
| Q | 4  |   |    | 9  | ✓ | ✓  |   |    |
| S | 5  |   |    | 8  | ✓ | ✓  |   |    |
| I | 6  | ✓ |    | 7  | ✓ | ✓  |   |    |
| G | 7  | ✓ |    | 6  | ✓ | ✓  |   |    |
| Q | 8  |   |    | 5  | ✓ | ✓  |   |    |
| S | 9  |   |    | 4  |   |    |   |    |
| I | 10 |   |    | 3  |   |    |   |    |
| S | 11 |   | ✓  | 2  | ✓ |    |   |    |
| K | 12 | ✓ |    | 1  |   |    |   |    |

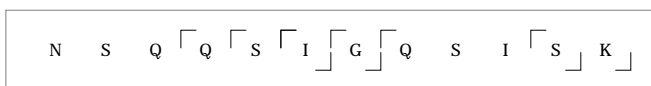

dbValid true MNISIVVSTR PHOS(3) 2. 679. 1.26262 5.16215 100. ? 3084.

S\_Acido\_new%gii68566543|gb|AA79472.1| MNISIVVSTR%::::PHOS::::PHOS:PHOS::%sample\_0%compd\_1682

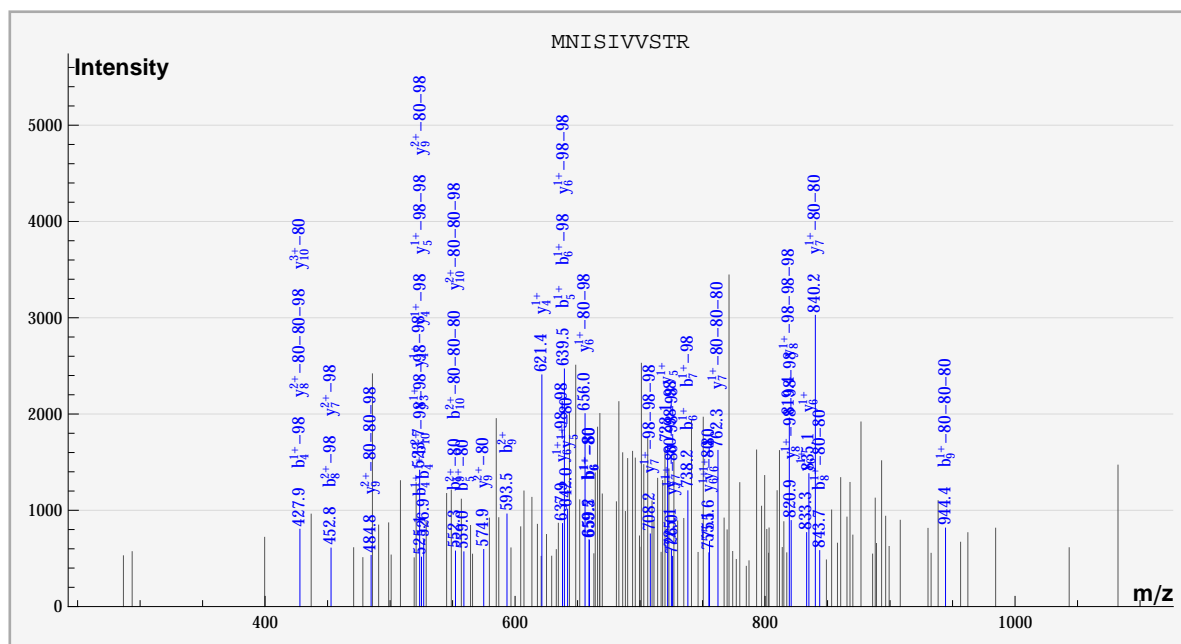

|   | #  | b | b* | # | y | y* | P | P* |
|---|----|---|----|---|---|----|---|----|
| M | 1  |   |    |   |   |    |   | ✓  |
| N | 2  |   |    | 9 |   | ✓  |   |    |
| I | 3  |   |    | 8 |   | ✓  |   |    |
| S | 4  | ✓ | ✓  | 7 |   | ✓  |   |    |
| I | 5  | ✓ | ✓  | 6 | ✓ | ✓  |   |    |
| V | 6  | ✓ | ✓  | 5 | ✓ | ✓  |   |    |
| V | 7  |   | ✓  | 4 | ✓ | ✓  |   |    |
| S | 8  |   | ✓  | 3 | ✓ |    |   |    |
| T | 9  | ✓ | ✓  | 2 |   |    |   |    |
| R | 10 |   | ✓  | 1 |   |    |   |    |

M N I S I V V S T R

dbValid true NSQQSIGQSISK PHOS(1) 2. 679. -0.188618 5.17487 100. ? 3324.  
 S\_Acido\_new%gi|68568657|gb|AAy81586.1| NSQQSIGQSISK%:.....PHOS::%sample\_0%compd\_1904

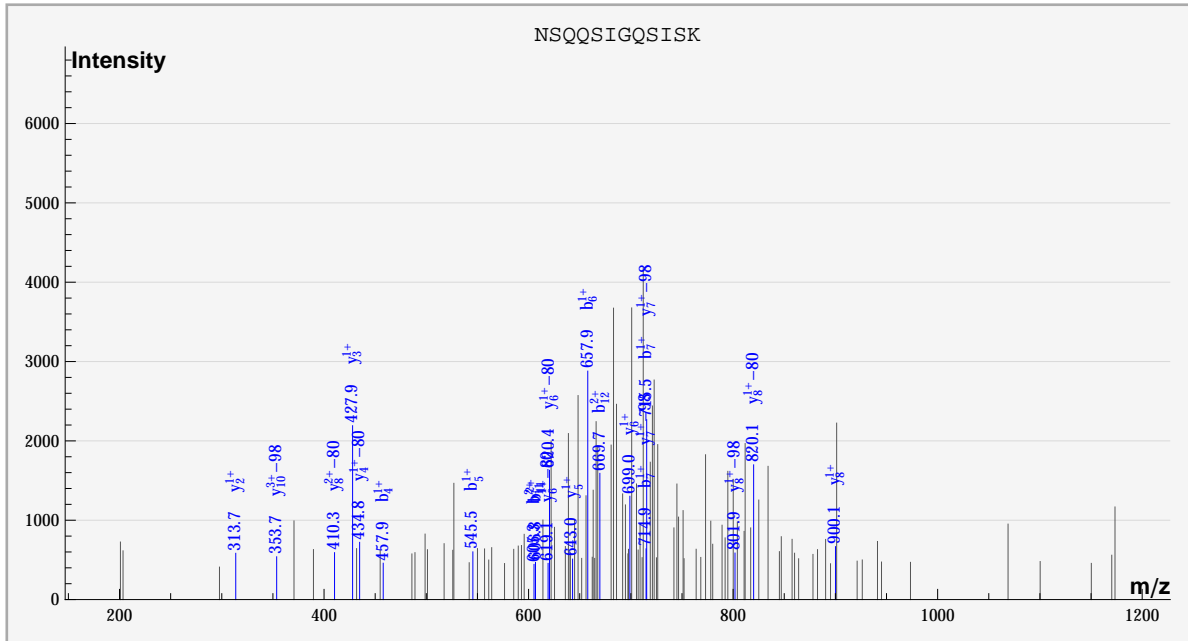

|   | #  | b | b* | #  | y | y* | P | P* |
|---|----|---|----|----|---|----|---|----|
| N | 1  |   |    |    |   |    |   |    |
| S | 2  |   |    | 11 |   |    |   |    |
| Q | 3  |   |    | 10 |   | ✓  |   |    |
| Q | 4  | ✓ |    | 9  |   |    |   |    |
| S | 5  | ✓ |    | 8  | ✓ | ✓  |   |    |
| I | 6  | ✓ |    | 7  |   | ✓  |   |    |
| G | 7  | ✓ |    | 6  | ✓ | ✓  |   |    |
| Q | 8  |   |    | 5  | ✓ |    |   |    |
| S | 9  |   |    | 4  |   | ✓  |   |    |
| I | 10 |   |    | 3  | ✓ |    |   |    |
| S | 11 | ✓ |    | 2  | ✓ |    |   |    |
| K | 12 | ✓ |    | 1  |   |    |   |    |

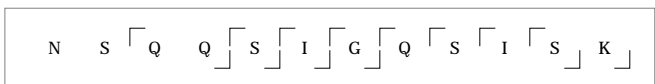

dbValid true MTIKVINISKK PHOS(1) 2. 679. -1.11998 5.36326 100. ? 3588.  
 S\_Acido\_new%gi|68567455|gb|AAY80384.1| MTIKVINISKK%:.....PHOS:::sample\_0%compd\_2148

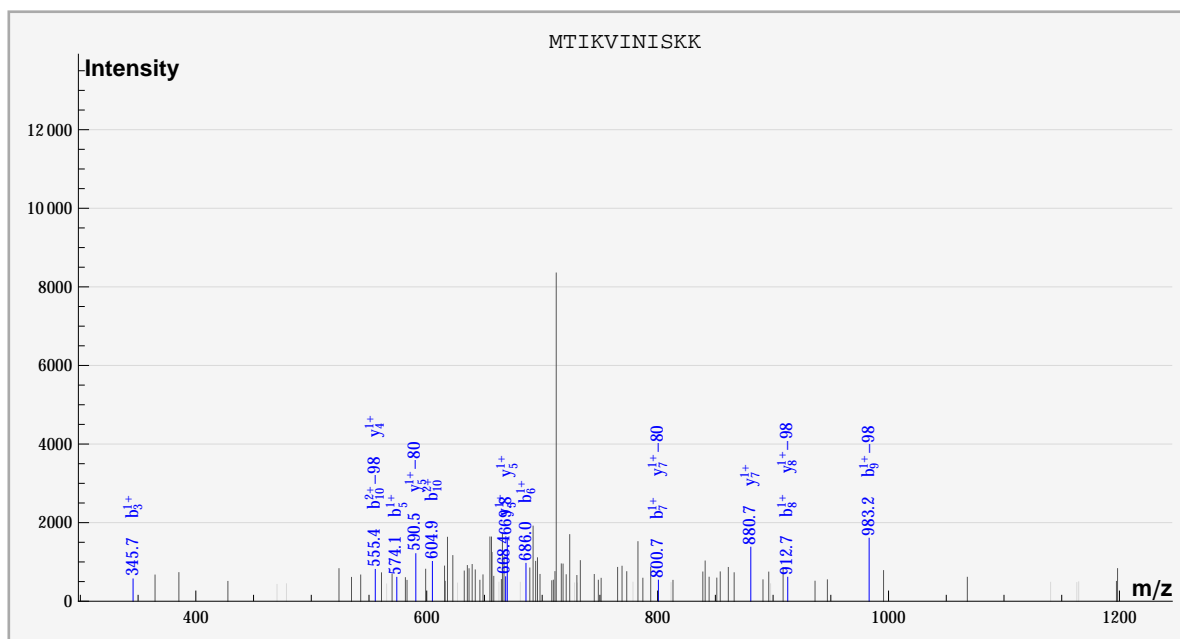

|   | #  | b | b* | #  | y | y* | P | P* |
|---|----|---|----|----|---|----|---|----|
| M | 1  |   |    |    |   |    |   |    |
| T | 2  |   |    | 10 |   |    |   |    |
| I | 3  | ✓ |    | 9  |   |    |   |    |
| K | 4  |   |    | 8  |   | ✓  |   |    |
| V | 5  | ✓ |    | 7  | ✓ | ✓  |   |    |
| I | 6  | ✓ |    | 6  |   |    |   |    |
| N | 7  | ✓ |    | 5  | ✓ | ✓  |   |    |
| I | 8  | ✓ |    | 4  | ✓ |    |   |    |
| S | 9  |   | ✓  | 3  |   |    |   |    |
| K | 10 | ✓ | ✓  | 2  |   |    |   |    |
| K | 11 |   |    | 1  |   |    |   |    |

M T I K V I N I S K K

dbValid true TKTGEFTQSKR PHOS(1) 2. 680. 1.82429 5.21698 100. ? 2712.  
 S\_Acido\_new%gil68567392|gb|AAY80321.1| TKTGEFTQSKR%:::PHOS:::sample\_3%cmpd\_1343

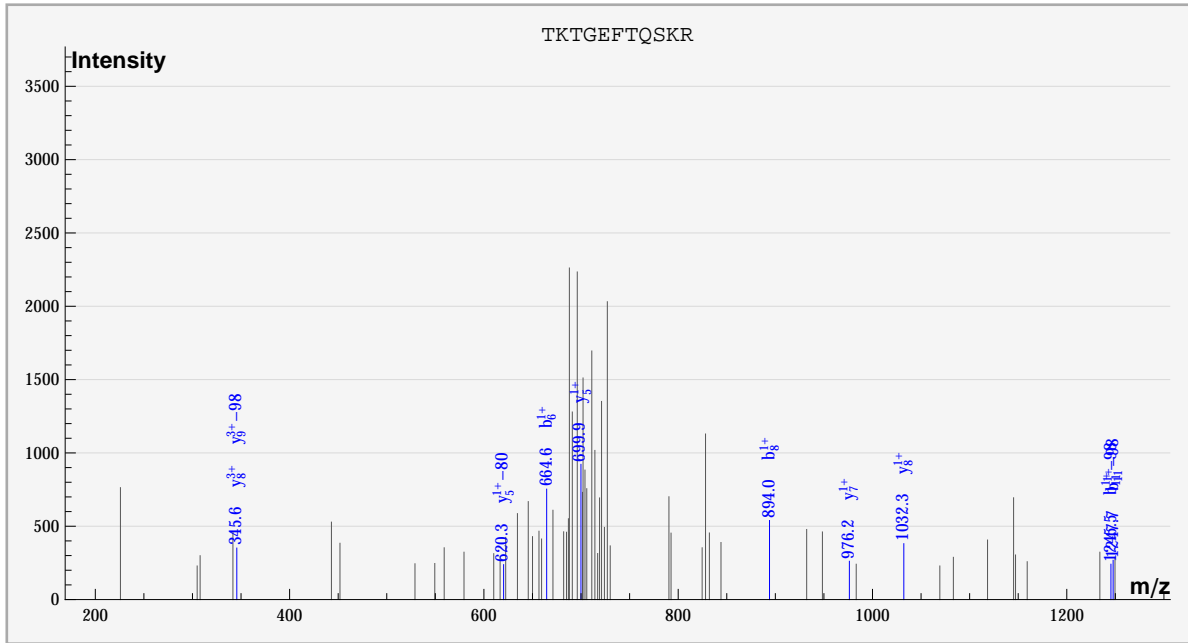

|   | #  | b | b* | #  | y | y* | P | P* |
|---|----|---|----|----|---|----|---|----|
| T | 1  |   |    |    |   |    |   |    |
| K | 2  |   |    | 10 |   |    |   |    |
| T | 3  |   |    | 9  |   | ✓  |   |    |
| G | 4  |   |    | 8  | ✓ |    |   |    |
| E | 5  |   |    | 7  | ✓ |    |   |    |
| F | 6  | ✓ |    | 6  |   |    |   |    |
| T | 7  |   |    | 5  | ✓ | ✓  |   |    |
| Q | 8  | ✓ |    | 4  |   |    |   |    |
| S | 9  |   |    | 3  |   |    |   |    |
| K | 10 |   |    | 2  |   |    |   |    |
| R | 11 |   | ✓  | 1  |   |    |   |    |

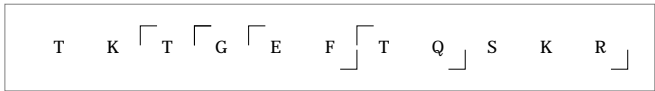

dbValid true NYSQLEDTVK PHOS(2) 2. 680. -1.24038 5.67562 100. ? 3132.  
 S\_Acido\_new%gi|68568081|gb|AA81010.1| NYSQLEDTVK%::PHOS:::PHOS::%sample\_3%compd\_1729

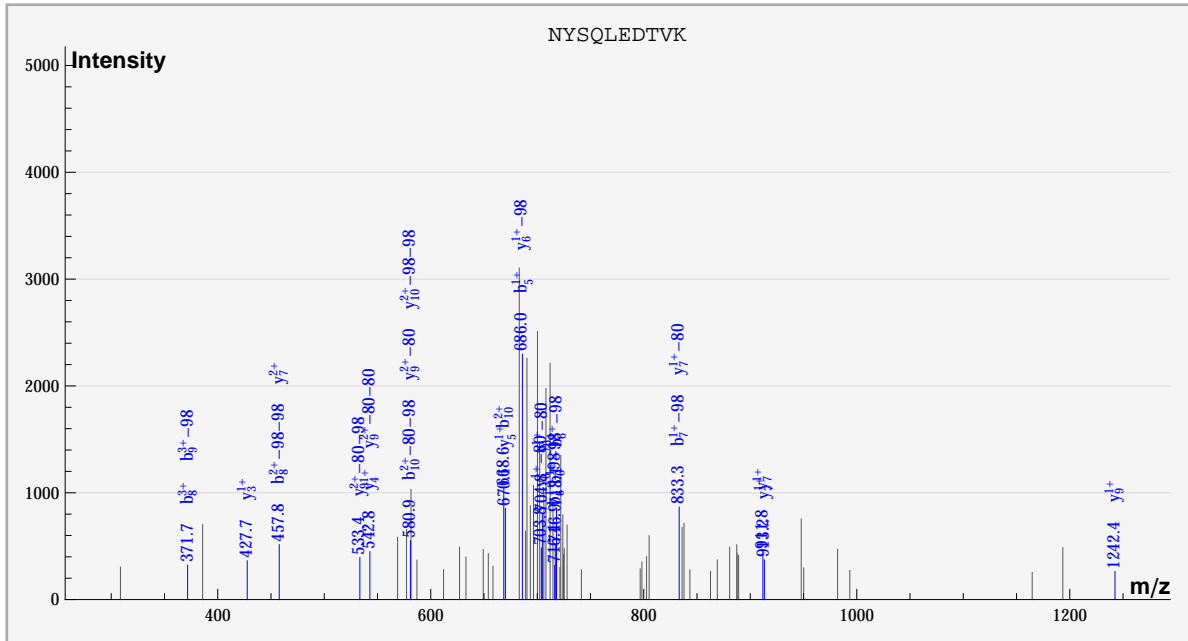

|   | #  | b | b* | # | y | y* | P | P* |
|---|----|---|----|---|---|----|---|----|
| N | 1  |   |    |   |   |    |   | ✓  |
| Y | 2  |   |    | 9 | ✓ | ✓  |   |    |
| S | 3  |   |    | 8 |   |    |   |    |
| Q | 4  |   |    | 7 | ✓ | ✓  |   |    |
| L | 5  | ✓ |    | 6 |   | ✓  |   |    |
| E | 6  |   | ✓  | 5 | ✓ |    |   |    |
| D | 7  |   | ✓  | 4 | ✓ |    |   |    |
| T | 8  | ✓ | ✓  | 3 | ✓ |    |   |    |
| V | 9  |   | ✓  | 2 |   |    |   |    |
| K | 10 | ✓ | ✓  | 1 |   |    |   |    |

{
N
{
Y
S
{
Q
{
L
}
}
E
}
}
D
}
}
T
}
}
V
}
}
K
}
}



dbValid true GPPLSK PHOS(1) 1. 680. -1.67782 6.02304 100. ? 3186.  
 S\_Acido\_new%gi|68567821|gb|AAY80750.1| GPPLSK%::::PHOS::%sample\_2%cmpd\_1666

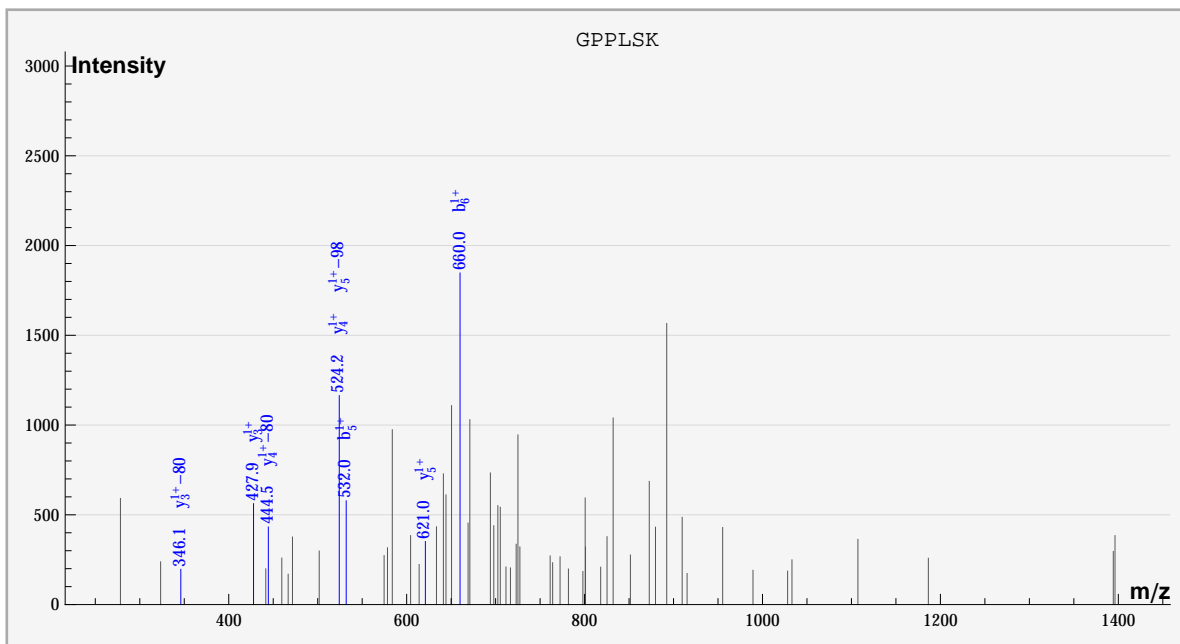

|   | # | b | b* | # | y | y* | P | P* |
|---|---|---|----|---|---|----|---|----|
| G | 1 |   |    |   |   |    |   |    |
| P | 2 |   |    | 5 | ✓ | ✓  |   |    |
| P | 3 |   |    | 4 | ✓ | ✓  |   |    |
| L | 4 |   |    | 3 | ✓ | ✓  |   |    |
| S | 5 | ✓ |    | 2 |   |    |   |    |
| K | 6 | ✓ |    | 1 |   |    |   |    |

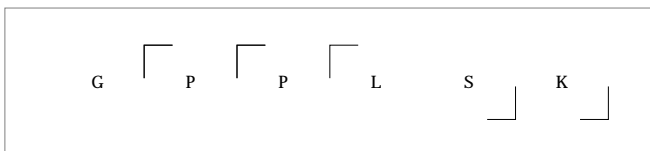

dbValid true FWENIIGRSR PHOS(1) 2. 680. -0.675748 5.24847 100. ? 3282.  
 S\_Acido\_new%gi|68568042|gb|AA80971.1| FWENIIGRSR%:::::PHOS::%sample\_2%cmpd\_1750

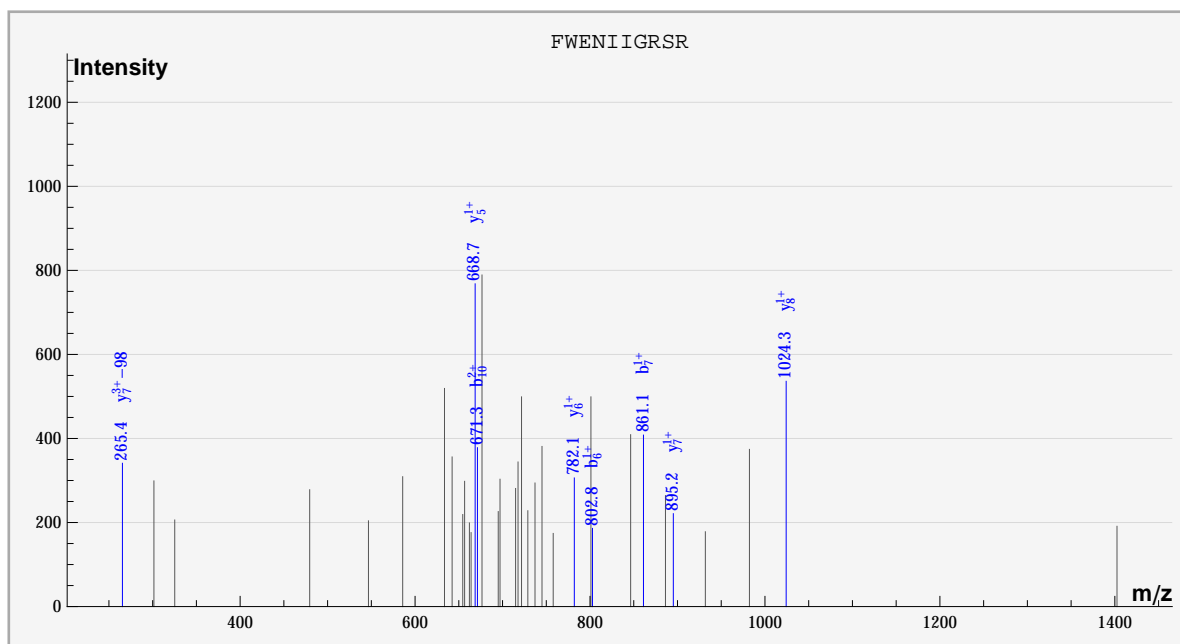

|   | #  | b | b* | # | y | y* | P | P* |
|---|----|---|----|---|---|----|---|----|
| F | 1  |   |    |   |   |    |   |    |
| W | 2  |   |    | 9 |   |    |   |    |
| E | 3  |   |    | 8 | ✓ |    |   |    |
| N | 4  |   |    | 7 | ✓ | ✓  |   |    |
| I | 5  |   |    | 6 | ✓ |    |   |    |
| I | 6  | ✓ |    | 5 | ✓ |    |   |    |
| G | 7  | ✓ |    | 4 |   |    |   |    |
| R | 8  |   |    | 3 |   |    |   |    |
| S | 9  |   |    | 2 |   |    |   |    |
| R | 10 | ✓ |    | 1 |   |    |   |    |

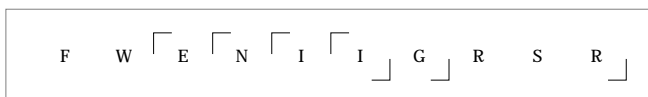

dbValid true NYSQLEDTVK PHOS(2) 2. 680. -1.24038 5.13951 100. ? 3342.  
 S\_Acido\_new%gi|68568081|gb|AA81010.1| NYSQLEDTVK%::PHOS:::PHOS:::sample\_3%compd\_1918

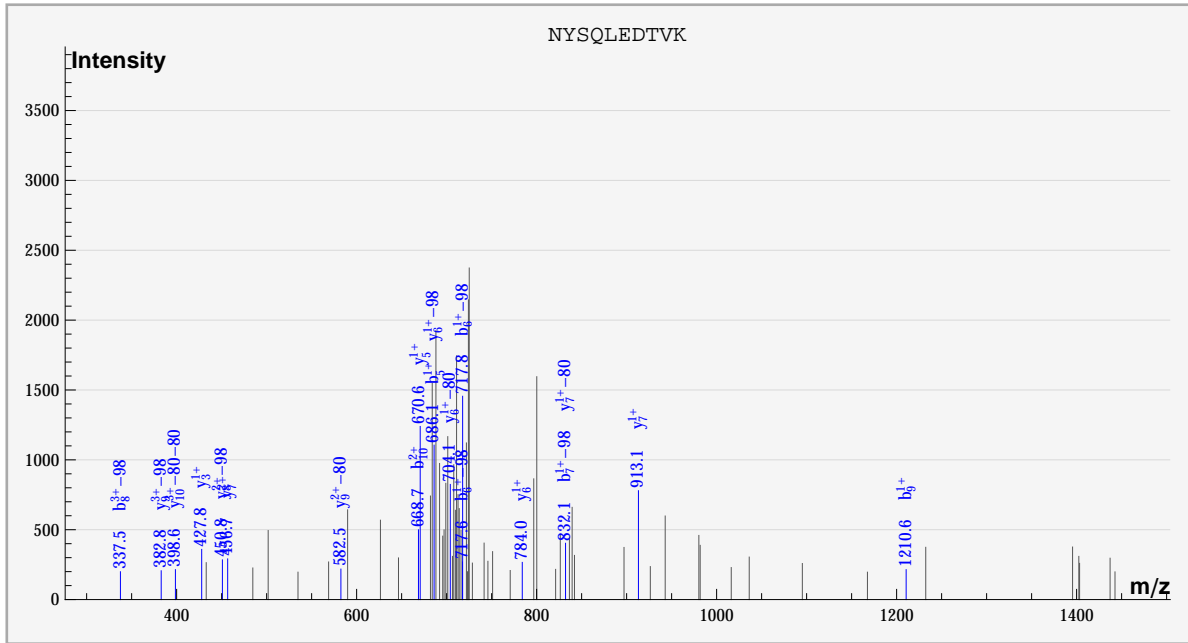

|   | #  | b | b* | # | y | y* | P | P* |
|---|----|---|----|---|---|----|---|----|
| N | 1  |   |    |   |   |    |   | ✓  |
| Y | 2  |   |    | 9 |   | ✓  |   |    |
| S | 3  |   |    | 8 |   | ✓  |   |    |
| Q | 4  |   |    | 7 | ✓ | ✓  |   |    |
| L | 5  | ✓ |    | 6 | ✓ | ✓  |   |    |
| E | 6  |   | ✓  | 5 | ✓ |    |   |    |
| D | 7  |   | ✓  | 4 |   |    |   |    |
| T | 8  |   | ✓  | 3 | ✓ |    |   |    |
| V | 9  | ✓ |    | 2 |   |    |   |    |
| K | 10 | ✓ |    | 1 |   |    |   |    |

┌ N ─┐ ┌ Y ─┐ ┌ S ─┐ ┌ Q ─┐ ┌ L ─┐ ┌ E ─┐ ┌ D ─┐ ┌ T ─┐ ┌ V ─┐ ┌ K ─┐

dbValid true FLKGYEDDK PHOS(1) 2. 681. -1.71079 5.13818 100. ? 2118.  
 S\_Acido\_new%gi|68568489|gb|AAY81418.1| FLKGYEDDK%:::PHOS:::sample\_1%compd\_756

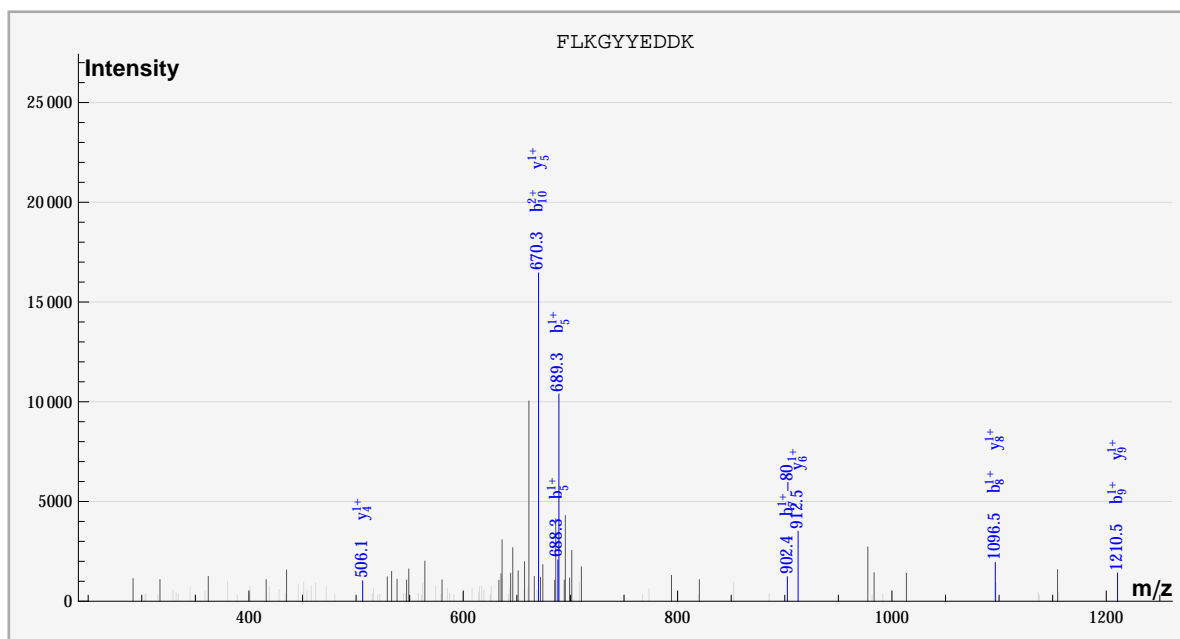

|   | #  | b | b* | # | y | y* | P | P* |
|---|----|---|----|---|---|----|---|----|
| F | 1  |   |    |   |   |    |   |    |
| L | 2  |   |    | 9 | ✓ |    |   |    |
| K | 3  |   |    | 8 | ✓ |    |   |    |
| G | 4  |   |    | 7 |   |    |   |    |
| Y | 5  | ✓ |    | 6 | ✓ |    |   |    |
| Y | 6  |   |    | 5 | ✓ |    |   |    |
| E | 7  |   | ✓  | 4 | ✓ |    |   |    |
| D | 8  | ✓ |    | 3 |   |    |   |    |
| D | 9  | ✓ |    | 2 |   |    |   |    |
| K | 10 | ✓ |    | 1 |   |    |   |    |

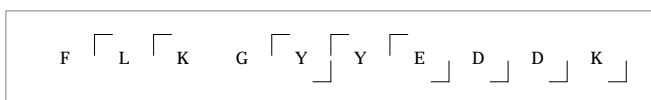

dbValid true FWENIIGRSR PHOS(1) 2. 681. -1.67575 4.98498 100. ? 2250.  
 S\_Acido\_new%gi|68568042|gb|AA80971.1| FWENIIGRSR%:::::PHOS::%sample\_3%compd\_925

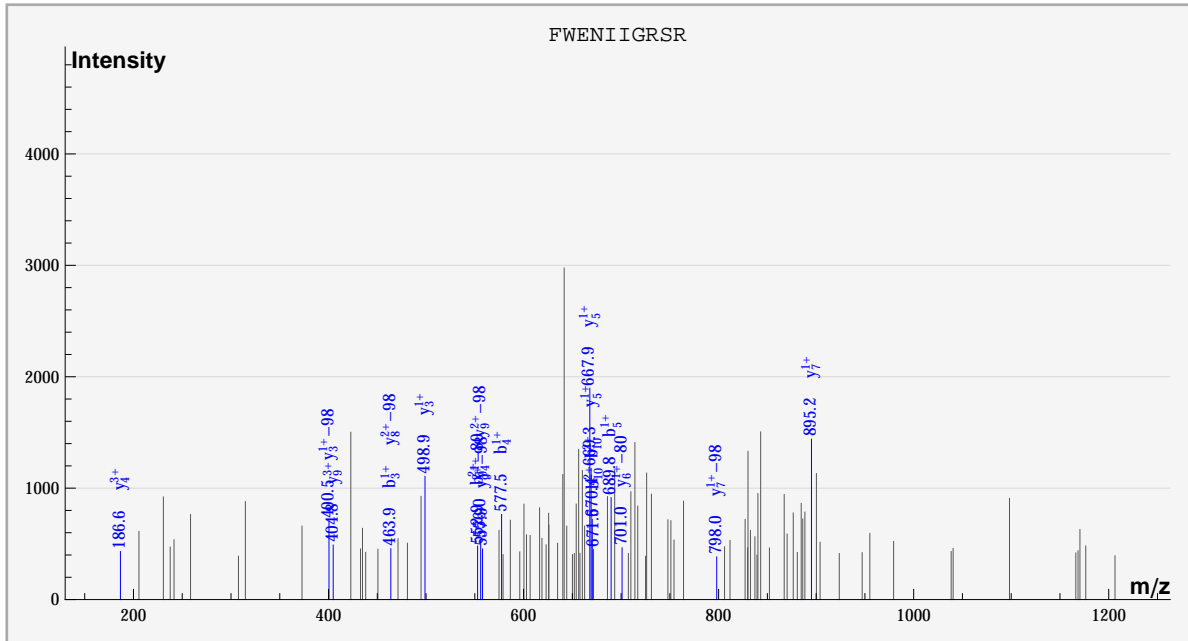

|   | #  | b | b* | # | y | y* | P | P* |
|---|----|---|----|---|---|----|---|----|
| F | 1  |   |    |   |   |    |   |    |
| W | 2  |   |    | 9 | ✓ | ✓  |   |    |
| E | 3  | ✓ |    | 8 |   | ✓  |   |    |
| N | 4  | ✓ |    | 7 | ✓ | ✓  |   |    |
| I | 5  | ✓ |    | 6 |   | ✓  |   |    |
| I | 6  |   |    | 5 | ✓ |    |   |    |
| G | 7  |   |    | 4 | ✓ |    |   |    |
| R | 8  |   |    | 3 | ✓ | ✓  |   |    |
| S | 9  |   | ✓  | 2 |   |    |   |    |
| R | 10 | ✓ |    | 1 |   |    |   |    |

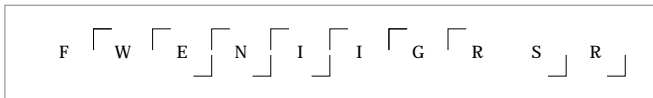

dbValid true SILEASDNIK PHOS(2) 2. 681. 0.801282 5.1204 100. ? 3690.

S\_Acido\_new%gi|68567536|gb|AA80465.1| SILEASDNIK%:PHOS:::PHOS:::sample\_3%compd\_2239

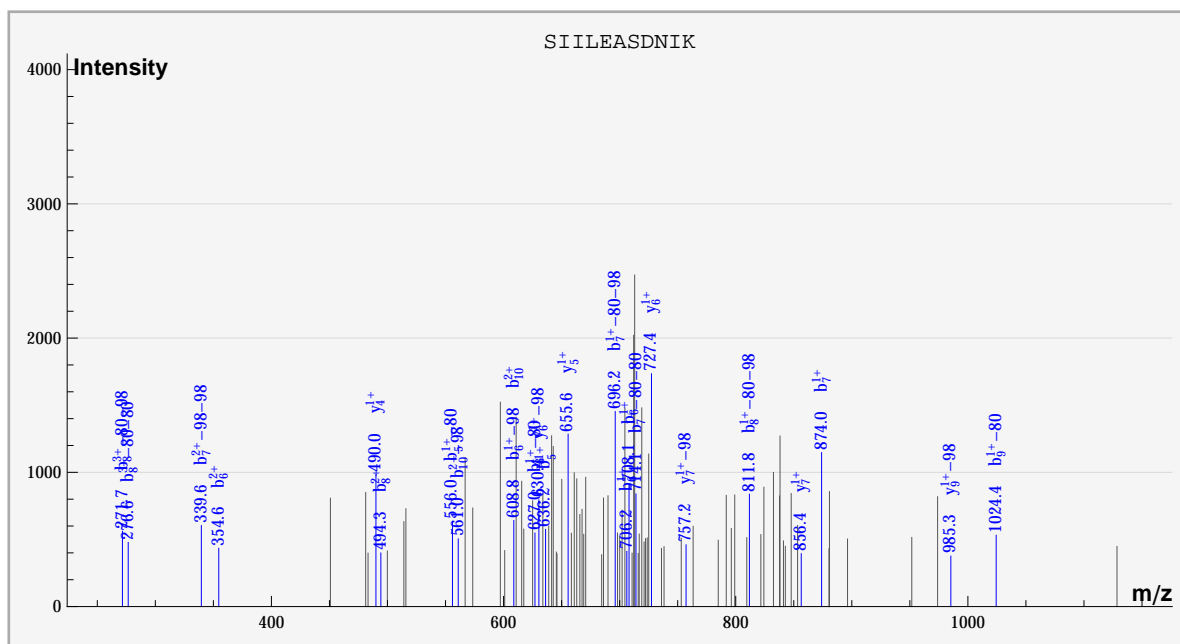

|   | #  | b | b* | #  | y | y* | P | P* |
|---|----|---|----|----|---|----|---|----|
| S | 1  |   |    |    |   |    |   |    |
| I | 2  |   |    | 10 |   |    |   |    |
| I | 3  |   |    | 9  |   | ✓  |   |    |
| L | 4  |   |    | 8  |   |    |   |    |
| E | 5  | ✓ | ✓  | 7  | ✓ | ✓  |   |    |
| A | 6  | ✓ | ✓  | 6  | ✓ | ✓  |   |    |
| S | 7  | ✓ | ✓  | 5  | ✓ |    |   |    |
| D | 8  | ✓ | ✓  | 4  | ✓ |    |   |    |
| N | 9  |   | ✓  | 3  |   |    |   |    |
| I | 10 | ✓ | ✓  | 2  |   |    |   |    |
| K | 11 |   |    | 1  |   |    |   |    |

S I I L E A S D N I K

dbValid true TEEEEEEEEK PHOS(1) 2. 682. -1.2626 5.05066 100. ? 3906.  
 S\_Acido\_new%gi|68567193|gb|AAY80122.1| TEEEEEEEEK%:PHOS:::.....%sample\_1%cmpd\_2291

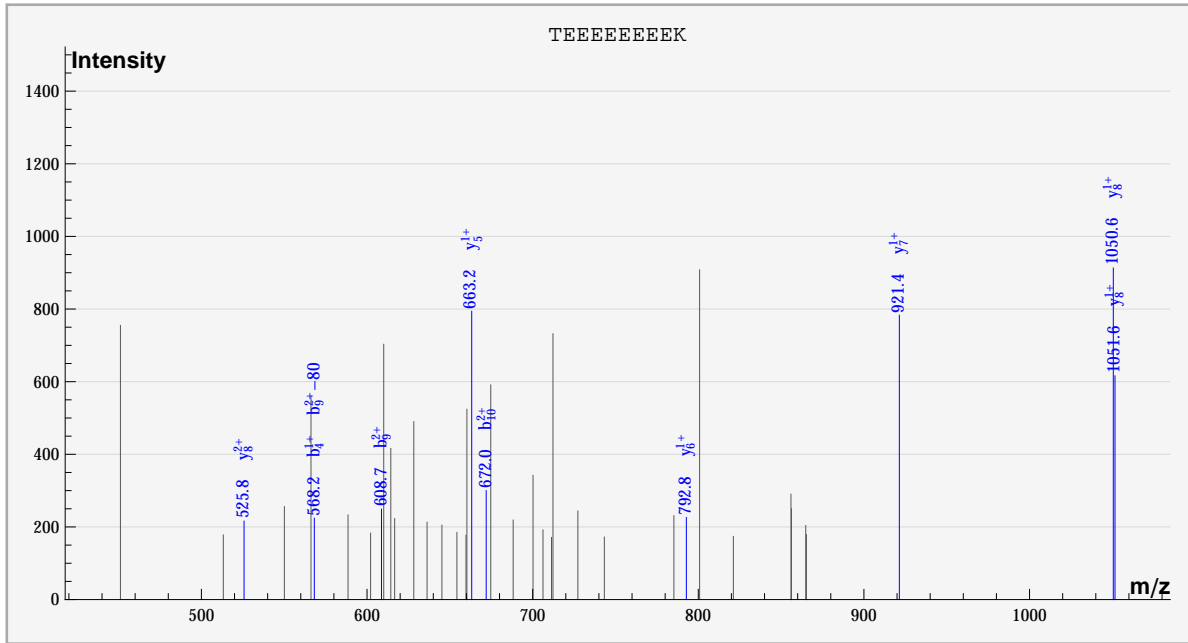

|   | #  | b | b* | # | y | y* | P | P* |
|---|----|---|----|---|---|----|---|----|
| T | 1  |   |    |   |   |    |   |    |
| E | 2  |   |    | 9 |   |    |   |    |
| E | 3  |   |    | 8 |   | ✓  |   |    |
| E | 4  | ✓ |    | 7 |   | ✓  |   |    |
| E | 5  |   |    | 6 |   | ✓  |   |    |
| E | 6  |   |    | 5 |   | ✓  |   |    |
| E | 7  |   |    | 4 |   |    |   |    |
| E | 8  |   |    | 3 |   |    |   |    |
| E | 9  | ✓ | ✓  | 2 |   |    |   |    |
| K | 10 | ✓ |    | 1 |   |    |   |    |

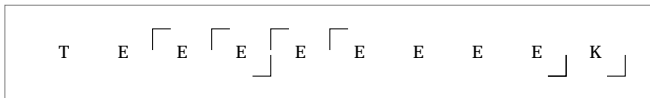

dbValid true TEEEEEEEEK PHOS(1) 2. 682. -1.2626 5.02195 100. ? 3918.  
 S\_Acido\_new%gi|68567193|gb|AAY80122.1| TEEEEEEEEK%:PHOS:::.....%sample\_1%cmpd\_2302

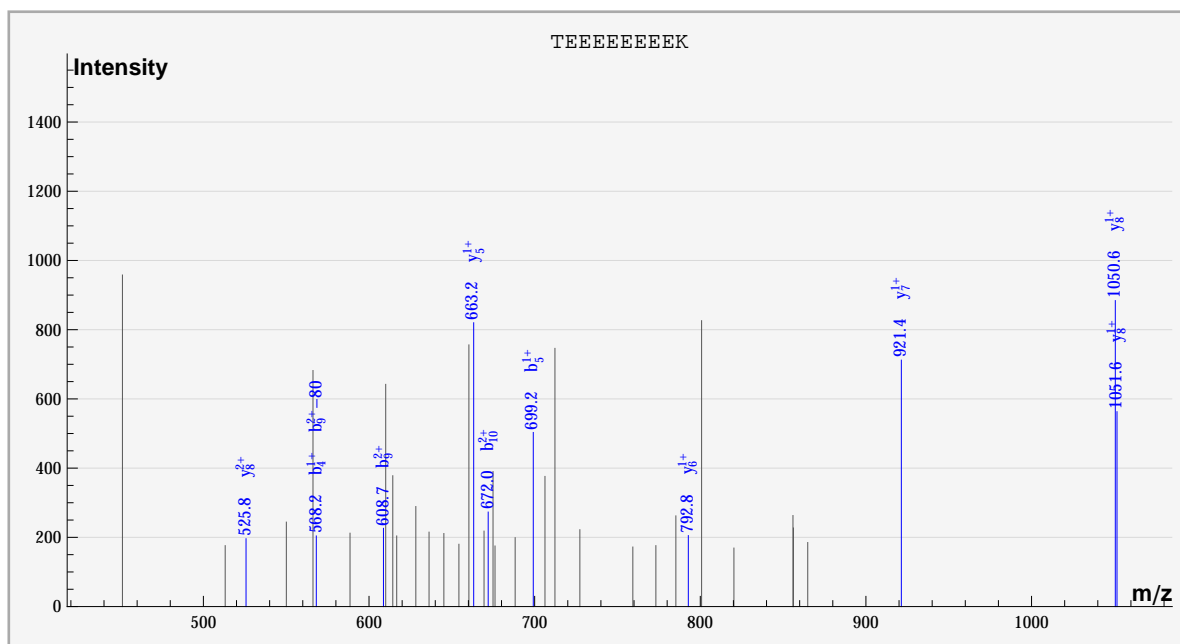

|   | #  | b | b* | # | y | y* | P | P* |
|---|----|---|----|---|---|----|---|----|
| T | 1  |   |    |   |   |    |   |    |
| E | 2  |   |    | 9 |   |    |   |    |
| E | 3  |   |    | 8 |   | ✓  |   |    |
| E | 4  | ✓ |    | 7 |   | ✓  |   |    |
| E | 5  | ✓ |    | 6 |   | ✓  |   |    |
| E | 6  |   |    | 5 |   | ✓  |   |    |
| E | 7  |   |    | 4 |   |    |   |    |
| E | 8  |   |    | 3 |   |    |   |    |
| E | 9  | ✓ | ✓  | 2 |   |    |   |    |
| K | 10 | ✓ |    | 1 |   |    |   |    |

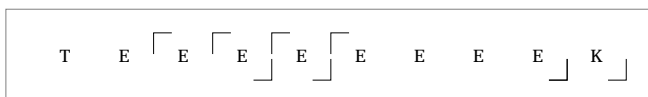



dbValid true TEEEEEEEEK PHOS(1) 2. 682. -1.2626 5.06085 100. ? 3930.  
 S\_Acido\_new%gi|68567193|gb|AAY80122.1| TEEEEEEEEK%:PHOS:::.....%sample\_1%cmpd\_2312

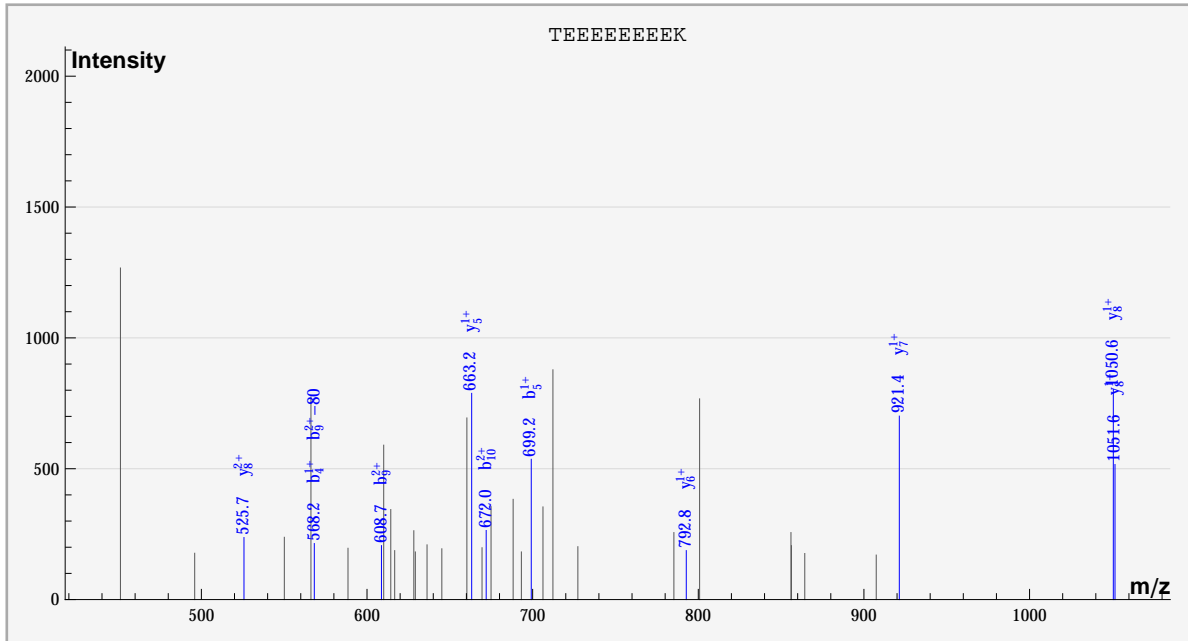

|   | #  | b | b* | # | y | y* | P | P* |
|---|----|---|----|---|---|----|---|----|
| T | 1  |   |    |   |   |    |   |    |
| E | 2  |   |    | 9 |   |    |   |    |
| E | 3  |   |    | 8 |   | ✓  |   |    |
| E | 4  | ✓ |    | 7 |   | ✓  |   |    |
| E | 5  | ✓ |    | 6 |   | ✓  |   |    |
| E | 6  |   |    | 5 |   | ✓  |   |    |
| E | 7  |   |    | 4 |   |    |   |    |
| E | 8  |   |    | 3 |   |    |   |    |
| E | 9  | ✓ | ✓  | 2 |   |    |   |    |
| K | 10 | ✓ |    | 1 |   |    |   |    |

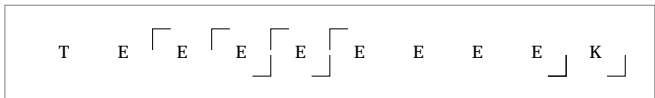

dbValid true DKYIFHFRR PHOS(1) 2. 682. -0.670663 5.44921 100. ? 4080.  
 S\_Acido\_new%gi|68568101|gb|AAY81030.1| DKYIFHFRR%:::PHOS:::sample\_3%cmpd\_2594

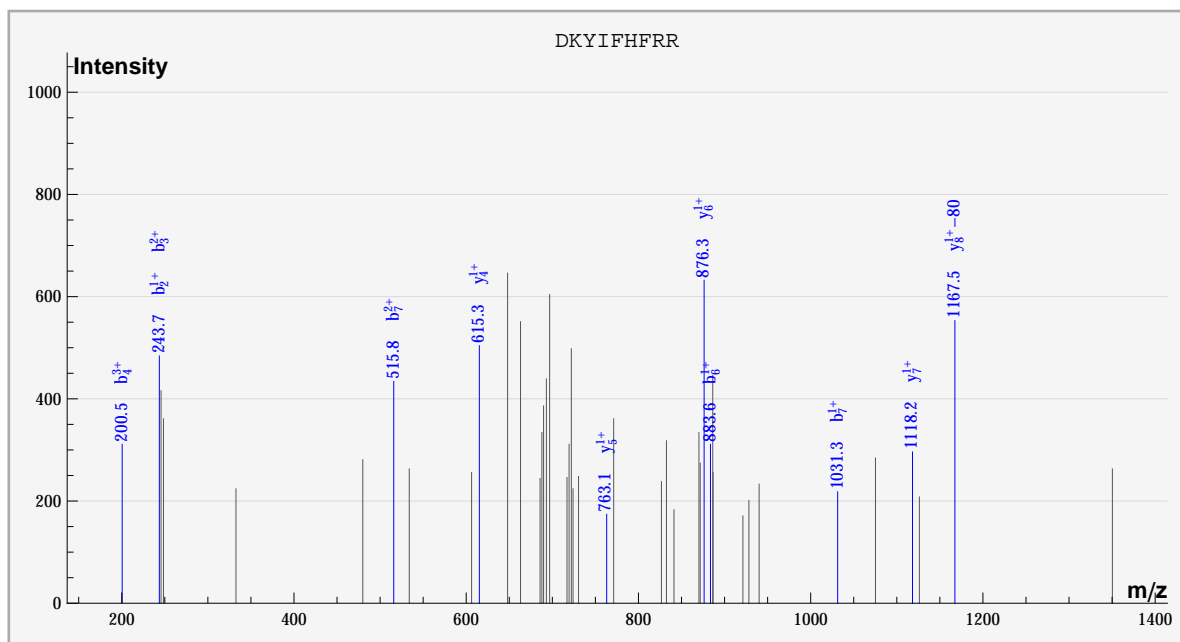

|   | # | b | b* | # | y | y* | P | P* |
|---|---|---|----|---|---|----|---|----|
| D | 1 |   |    |   |   |    |   |    |
| K | 2 | ✓ |    | 8 |   | ✓  |   |    |
| Y | 3 | ✓ |    | 7 | ✓ |    |   |    |
| I | 4 | ✓ |    | 6 | ✓ |    |   |    |
| F | 5 |   |    | 5 | ✓ |    |   |    |
| H | 6 | ✓ |    | 4 | ✓ |    |   |    |
| F | 7 | ✓ |    | 3 |   |    |   |    |
| R | 8 |   |    | 2 |   |    |   |    |
| R | 9 |   |    | 1 |   |    |   |    |

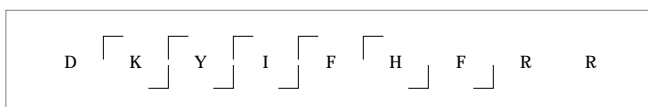

dbValid true GGSLLR PHOS(1) 1. 684. -1.67167 5.13087 100. ? 2640.  
 S\_Acido\_new%gi|68567831|gb|AAY80760.1| GGSLLR%:::PHOS:::%sample\_1%compd\_1206

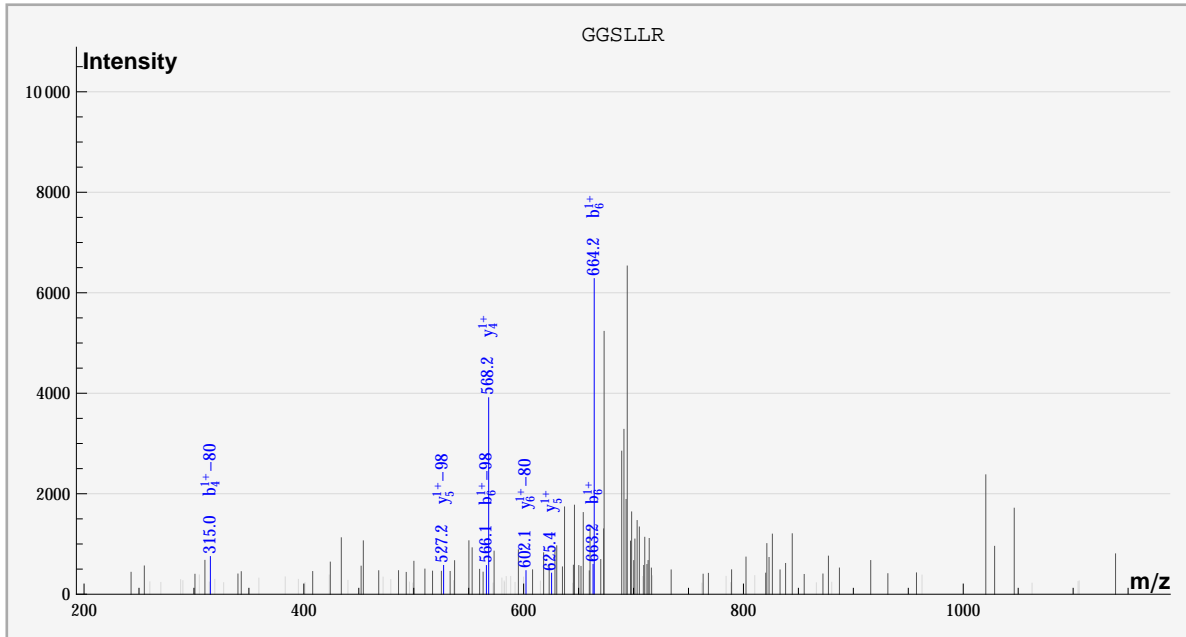

|   | # | b | b* | # | y | y* | P | P* |
|---|---|---|----|---|---|----|---|----|
| G | 1 |   |    |   |   |    |   | ✓  |
| G | 2 |   |    | 5 | ✓ | ✓  |   |    |
| S | 3 |   |    | 4 | ✓ |    |   |    |
| L | 4 | ✓ |    | 3 |   |    |   |    |
| L | 5 |   |    | 2 |   |    |   |    |
| R | 6 | ✓ | ✓  | 1 |   |    |   |    |

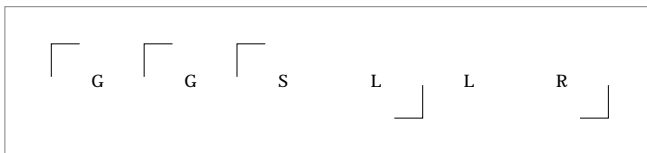

dbValid true GGSLLR PHOS(1) 1. 684. -1.67167 5.54287 100. ? 2868.  
 S\_Acido\_new%gi|68567831|gb|AAY80760.1| GGSLLR%:::PHOS:::%sample\_3%cmpd\_1490

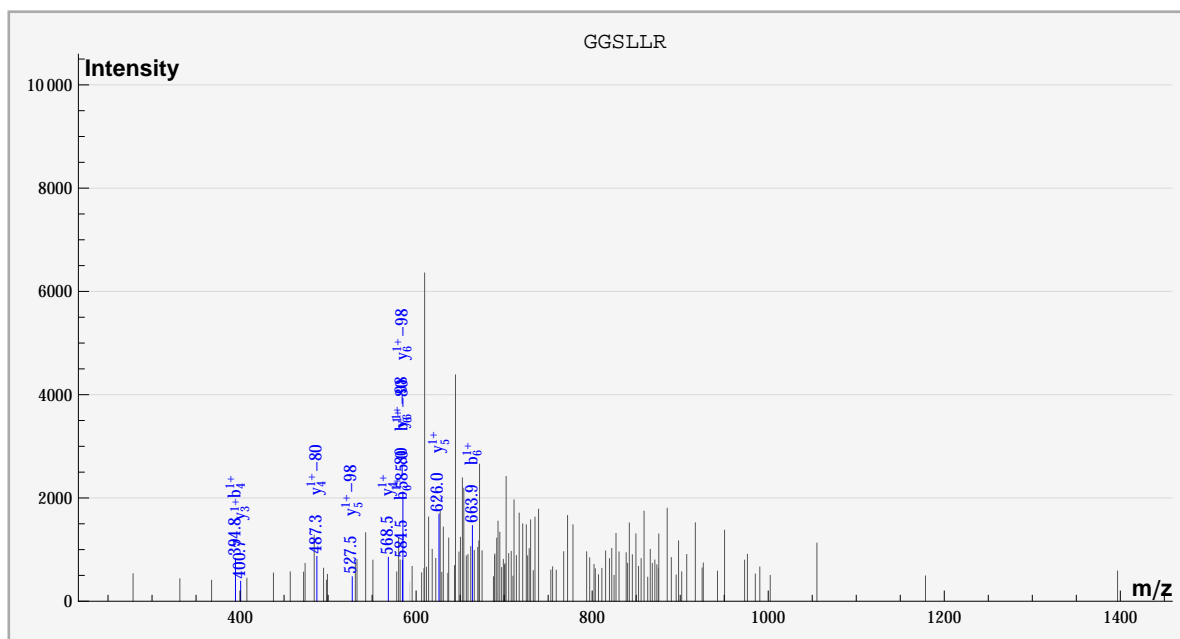

|   | # | b | b* | # | y | y* | P | P* |
|---|---|---|----|---|---|----|---|----|
| G | 1 |   |    |   |   |    |   | ✓  |
| G | 2 |   |    | 5 | ✓ | ✓  |   |    |
| S | 3 |   |    | 4 | ✓ | ✓  |   |    |
| L | 4 | ✓ |    | 3 | ✓ |    |   |    |
| L | 5 |   |    | 2 |   |    |   |    |
| R | 6 | ✓ | ✓  | 1 |   |    |   |    |

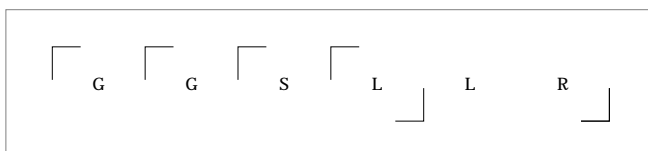

dbValid true LANTSVSVD DIR PHOS(1) 2. 684. 1.32157 5.02562 100. ? 3066.  
 S\_Acido\_new%gil68567378|gb|AAY80307.1| LANTSVSVD DIR%::::PHOS::::::::::%sample\_3%compd\_1667

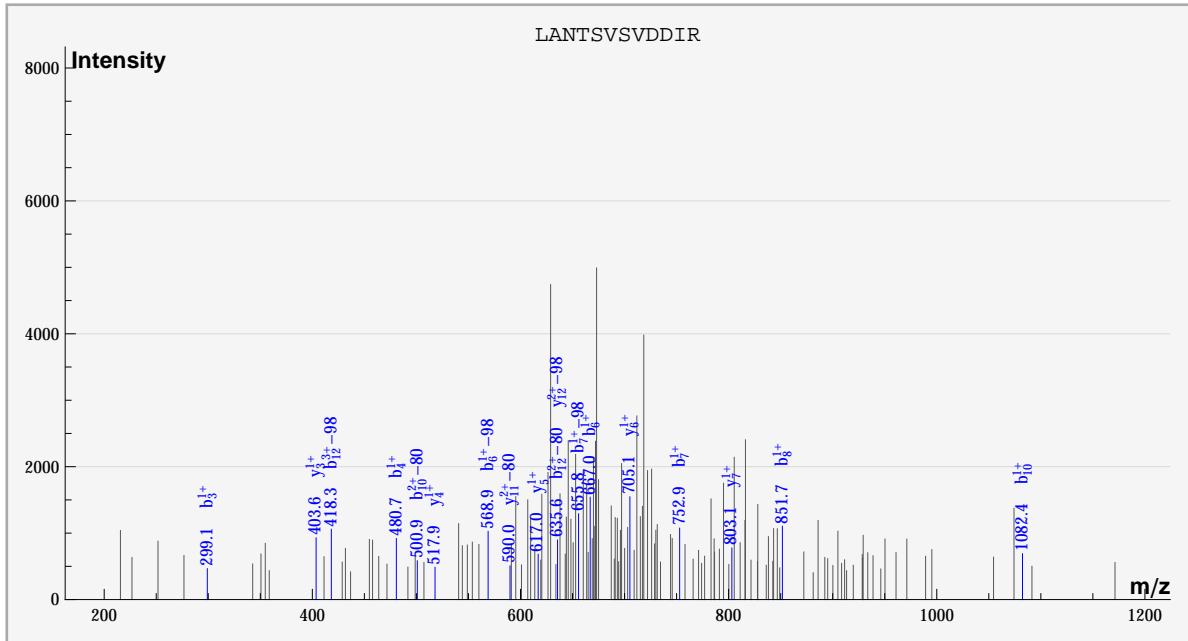

|   | #  | b | b* | #  | y | y* | P | P* |
|---|----|---|----|----|---|----|---|----|
| L | 1  |   |    |    |   |    |   | ✓  |
| A | 2  |   |    | 11 |   | ✓  |   |    |
| N | 3  | ✓ |    | 10 |   |    |   |    |
| T | 4  | ✓ |    | 9  |   |    |   |    |
| S | 5  |   |    | 8  |   |    |   |    |
| V | 6  | ✓ | ✓  | 7  | ✓ |    |   |    |
| S | 7  | ✓ | ✓  | 6  | ✓ |    |   |    |
| V | 8  | ✓ |    | 5  | ✓ |    |   |    |
| D | 9  |   |    | 4  | ✓ |    |   |    |
| D | 10 | ✓ | ✓  | 3  | ✓ |    |   |    |
| I | 11 |   |    | 2  |   |    |   |    |
| R | 12 |   | ✓  | 1  |   |    |   |    |

L A N T S V S V D D I R

dbValid true YWSSTEDR PHOS(4) 2. 684. -1.84232 5.33971 100. ? 4560.

S\_Acido\_new%gi|68568094|gb|AA81023.1| YWSSTEDR%:PHOS::PHOS:PHOS:PHOS:::%sample\_1%cmpd\_2838

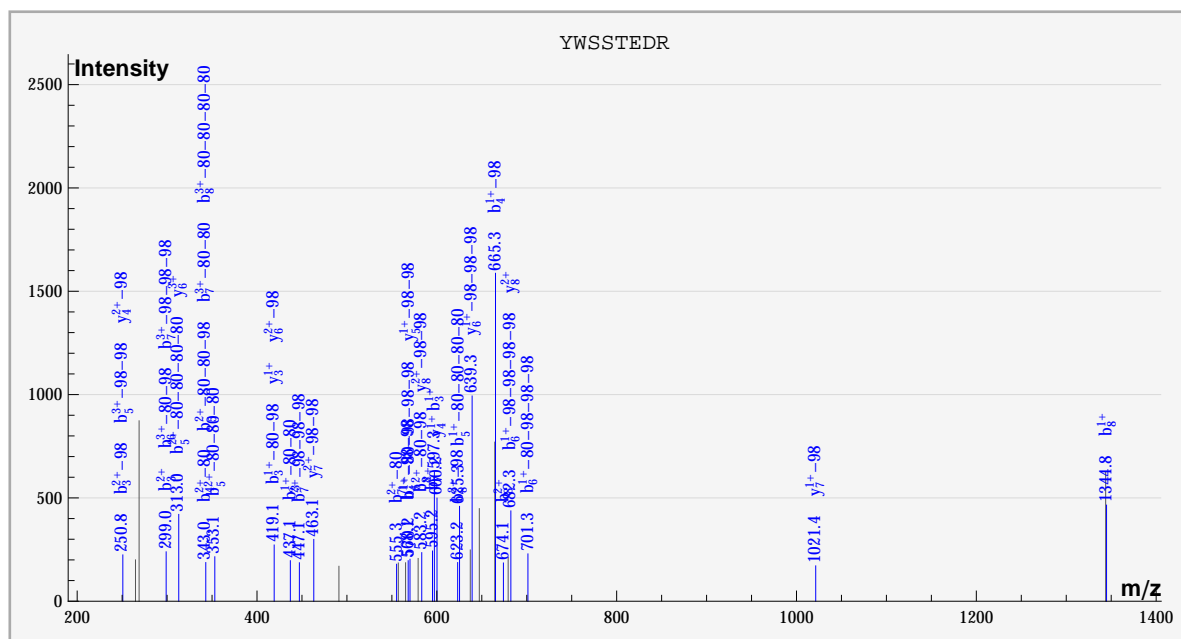

|   | # | b | b* | # | y | y* | P | P* |
|---|---|---|----|---|---|----|---|----|
| Y | 1 |   |    |   |   |    | ✓ | ✓  |
| W | 2 |   |    | 7 |   | ✓  |   |    |
| S | 3 | ✓ | ✓  | 6 | ✓ | ✓  |   |    |
| S | 4 |   | ✓  | 5 |   | ✓  |   |    |
| T | 5 |   | ✓  | 4 | ✓ | ✓  |   |    |
| E | 6 |   | ✓  | 3 |   | ✓  |   |    |
| D | 7 | ✓ | ✓  | 2 |   |    |   |    |
| R | 8 | ✓ | ✓  | 1 |   |    |   |    |

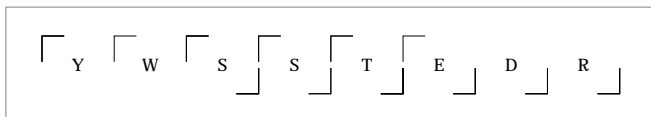

dbValid true YWSSTEDR PHOS(4) 2. 684. -1.84232 5.23785 100. ? 4584.

S\_Acido\_new%gii68568094|gb|AAy81023.1| YWSSTEDR%:PHOS::PHOS:PHOS:PHOS:::%sample\_1%cmpd\_2859

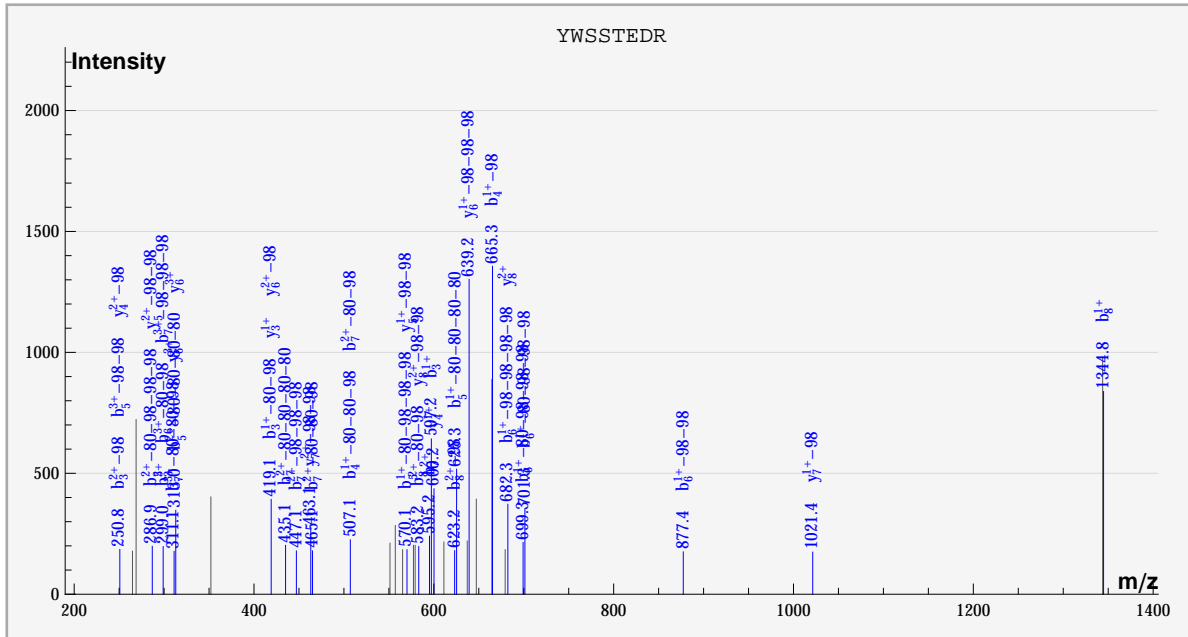

|   | # | b | b* | # | y | y* | P | P* |
|---|---|---|----|---|---|----|---|----|
| Y | 1 |   |    |   |   |    | ✓ | ✓  |
| W | 2 |   |    | 7 |   | ✓  |   |    |
| S | 3 | ✓ | ✓  | 6 | ✓ | ✓  |   |    |
| S | 4 |   | ✓  | 5 |   | ✓  |   |    |
| T | 5 |   | ✓  | 4 | ✓ | ✓  |   |    |
| E | 6 |   | ✓  | 3 |   | ✓  |   |    |
| D | 7 | ✓ | ✓  | 2 |   |    |   |    |
| R | 8 | ✓ | ✓  | 1 |   |    |   |    |

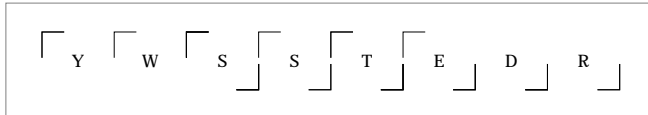

dbValid true RLKESSSSR PHOS(4) 2. 686. -0.778858 5.09483 100. ? 1422.  
 S\_Acido\_new%gi|68567995|gb|AAy80924.1| RLKESSSSR%::::PHOS:PHOS:PHOS:PHOS::%sample\_1%compd\_169

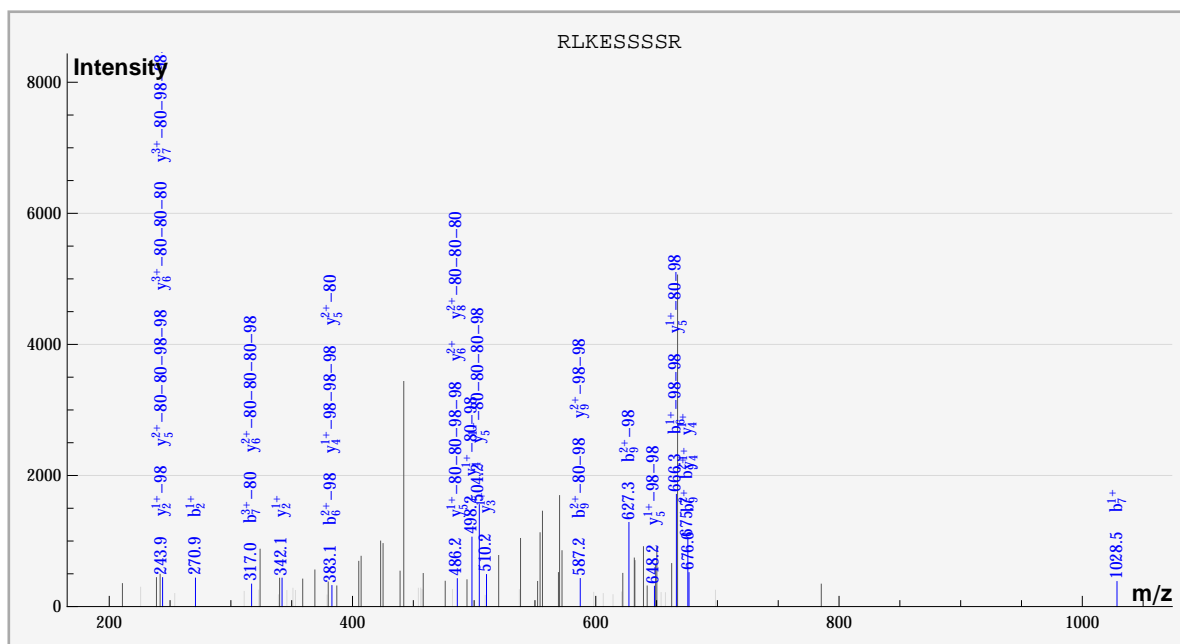

|   | # | b | b* | # | y | y* | P | P* |
|---|---|---|----|---|---|----|---|----|
| R | 1 |   |    |   |   |    |   | ✓  |
| L | 2 | ✓ |    | 8 |   | ✓  |   |    |
| K | 3 |   |    | 7 |   | ✓  |   |    |
| E | 4 |   |    | 6 | ✓ | ✓  |   |    |
| S | 5 |   |    | 5 |   | ✓  |   |    |
| S | 6 |   | ✓  | 4 | ✓ | ✓  |   |    |
| S | 7 | ✓ | ✓  | 3 | ✓ |    |   |    |
| S | 8 |   |    | 2 | ✓ | ✓  |   |    |
| R | 9 | ✓ | ✓  | 1 |   |    |   |    |

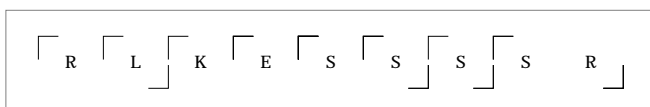



dbValid true IYKYGATYSPK PHOS(1) 2. 686. -0.176778 5.00005 100. ? 1818.  
 S\_Acido\_new%gil68568042|gb|AAY80971.1| IYKYGATYSPK%::PHOS:::sample\_1%compd\_505

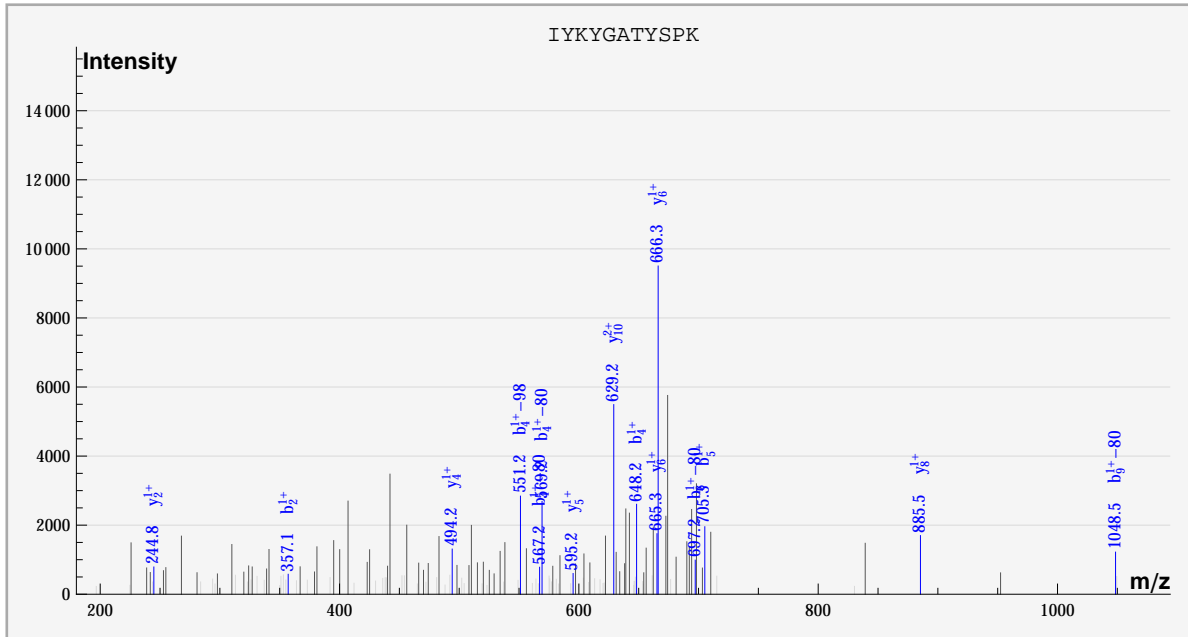

|   | #  | b | b* | #  | y | y* | P | P* |
|---|----|---|----|----|---|----|---|----|
| I | 1  |   |    |    |   |    |   |    |
| Y | 2  | ✓ |    | 10 | ✓ |    |   |    |
| K | 3  |   |    | 9  |   |    |   |    |
| Y | 4  | ✓ | ✓  | 8  | ✓ |    |   |    |
| G | 5  | ✓ |    | 7  |   |    |   |    |
| A | 6  |   | ✓  | 6  | ✓ |    |   |    |
| T | 7  |   |    | 5  | ✓ |    |   |    |
| Y | 8  |   |    | 4  | ✓ |    |   |    |
| S | 9  |   | ✓  | 3  |   |    |   |    |
| P | 10 |   |    | 2  | ✓ |    |   |    |
| K | 11 |   |    | 1  |   |    |   |    |

I Y K Y G A T Y S P K

dbValid true IKETVDEVLSR PHOS(1) 2. 686. -1.15786 5.81787 100. ? 2046.  
 S\_Acido\_new%gi|68567557|gb|AAV80486.1| IKETVDEVLSR%:::PHOS::%sample\_3%cmpd\_741

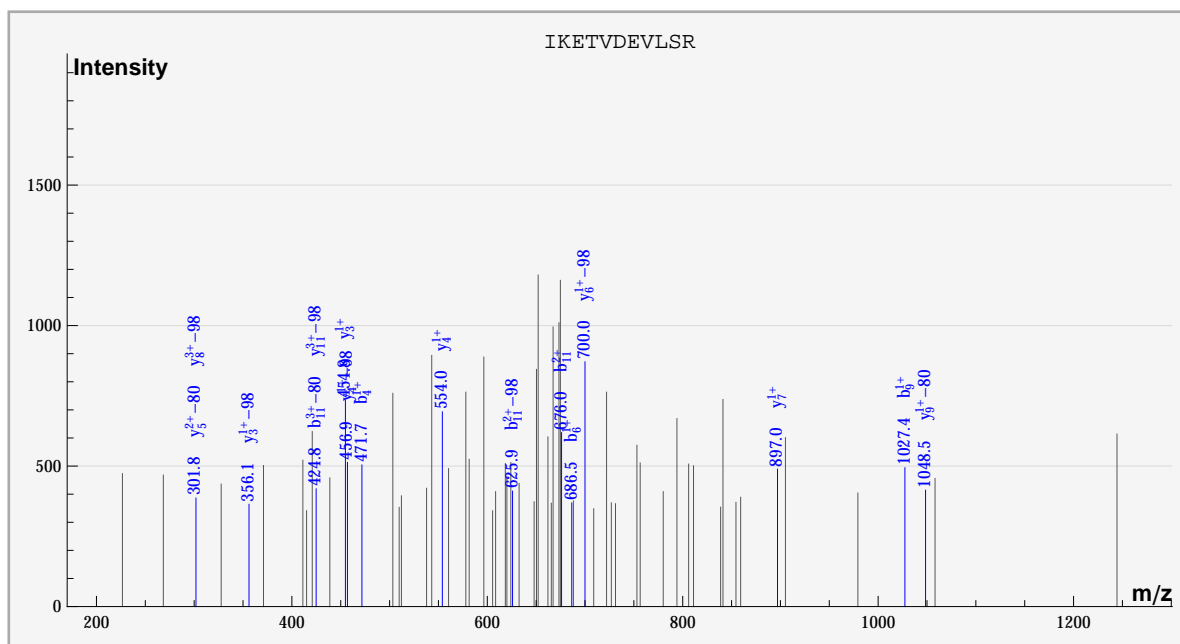

|   | #  | b | b* | #  | y | y* | P | P* |
|---|----|---|----|----|---|----|---|----|
| I | 1  |   |    |    |   |    |   | ✓  |
| K | 2  |   |    | 10 |   |    |   |    |
| E | 3  |   |    | 9  |   | ✓  |   |    |
| T | 4  | ✓ |    | 8  |   | ✓  |   |    |
| V | 5  |   |    | 7  | ✓ |    |   |    |
| D | 6  | ✓ |    | 6  |   | ✓  |   |    |
| E | 7  |   |    | 5  |   | ✓  |   |    |
| V | 8  |   |    | 4  | ✓ | ✓  |   |    |
| L | 9  | ✓ |    | 3  | ✓ | ✓  |   |    |
| S | 10 |   |    | 2  |   |    |   |    |
| R | 11 | ✓ | ✓  | 1  |   |    |   |    |

I K E T V D E V L S R

dbValid true SQILEIANYLK PHOS(1) 2. 686. 0.349602 5.00332 100. ? 2412.  
 S\_Acido\_new%gi|68568698|gb|AAY81627.1| SQILEIANYLK%:.....PHOS:::sample\_3%compd\_1073

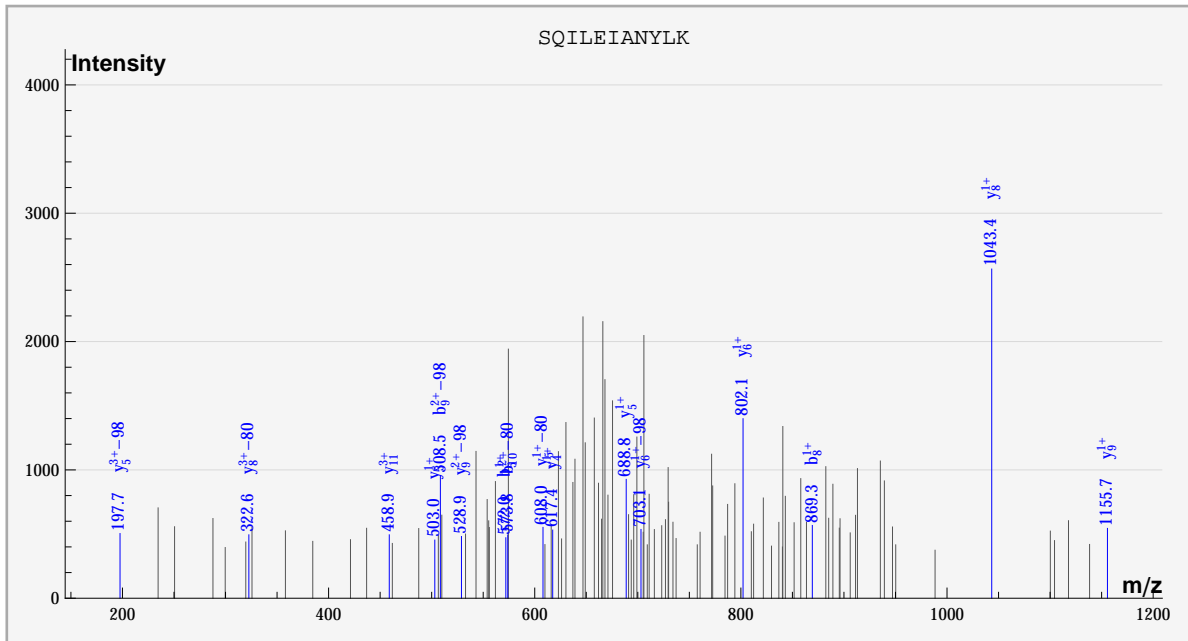

|   | #  | b | b* | #  | y | y* | P | P* |
|---|----|---|----|----|---|----|---|----|
| S | 1  |   |    |    |   |    |   | ✓  |
| Q | 2  |   |    | 10 |   |    |   |    |
| I | 3  |   |    | 9  | ✓ | ✓  |   |    |
| L | 4  |   |    | 8  | ✓ | ✓  |   |    |
| E | 5  | ✓ |    | 7  |   |    |   |    |
| I | 6  |   |    | 6  | ✓ | ✓  |   |    |
| A | 7  |   |    | 5  | ✓ | ✓  |   |    |
| N | 8  | ✓ |    | 4  | ✓ |    |   |    |
| Y | 9  |   | ✓  | 3  | ✓ |    |   |    |
| L | 10 |   | ✓  | 2  |   |    |   |    |
| K | 11 |   |    | 1  |   |    |   |    |

┌ S Q ┌ I ┌ L E ┌ I ┌ A ┌ N ┌ Y ┌ L ┌ K

dbValid true MTSILGGTCTR Cys\_CAM(1),Oxidation\_M(1),PHOS(2) 2.  
 686. 0.755497 4.97682 100. ? 3090. S\_Acido\_new%gi|68568045|gb|AAy80974.1|  
 MTSILGGTCTR::Oxidation\_M::PHOS:::Cys\_CAM:PHOS::%sample\_3%compd\_1691

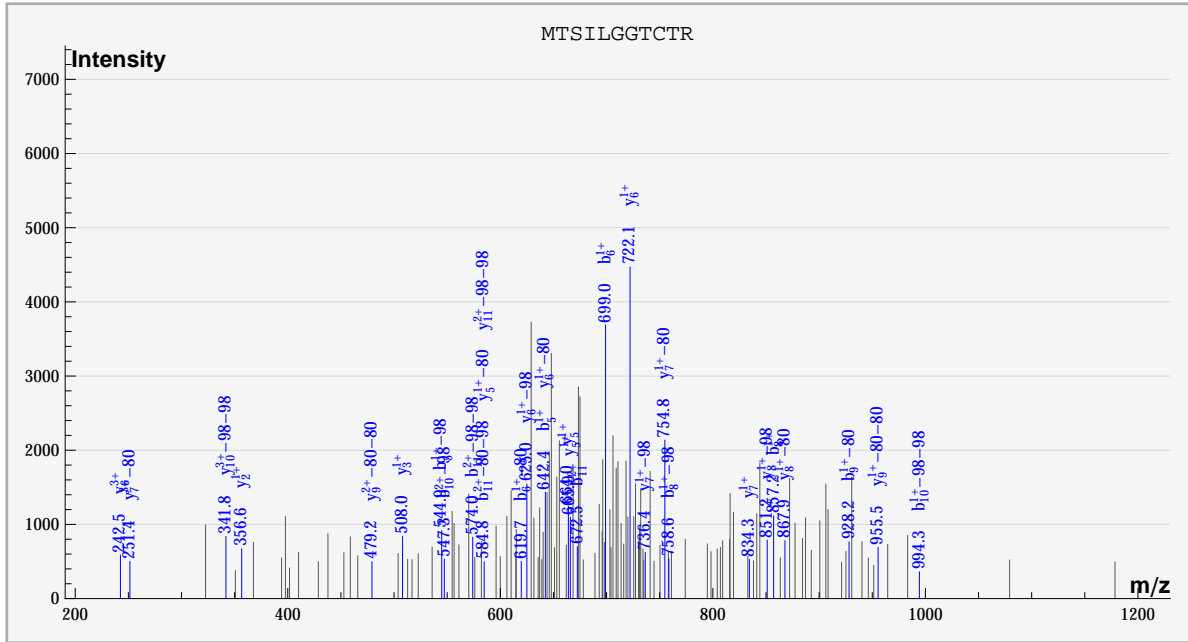

|   | #  | b | b* | #  | y | y* | P | P* |
|---|----|---|----|----|---|----|---|----|
| M | 1  |   |    |    |   |    |   | ✓  |
| T | 2  |   |    | 10 |   | ✓  |   |    |
| S | 3  |   |    | 9  |   | ✓  |   |    |
| I | 4  |   |    | 8  |   | ✓  |   |    |
| L | 5  | ✓ | ✓  | 7  | ✓ | ✓  |   |    |
| G | 6  | ✓ | ✓  | 6  | ✓ | ✓  |   |    |
| G | 7  |   |    | 5  | ✓ | ✓  |   |    |
| T | 8  | ✓ | ✓  | 4  |   |    |   |    |
| C | 9  |   | ✓  | 3  | ✓ |    |   |    |
| T | 10 |   | ✓  | 2  | ✓ |    |   |    |
| R | 11 | ✓ | ✓  | 1  |   |    |   |    |

MTSILGGTCTR

dbValid true LSMRKTNQVSK PHOS(1) 2. 686. 0.344337 5.00081 100. ? 3348.  
 S\_Acido\_new%gi|68568162|gb|AA81091.1| LSMRKTNQVSK%:::PHOS::%sample\_2%compd\_1809

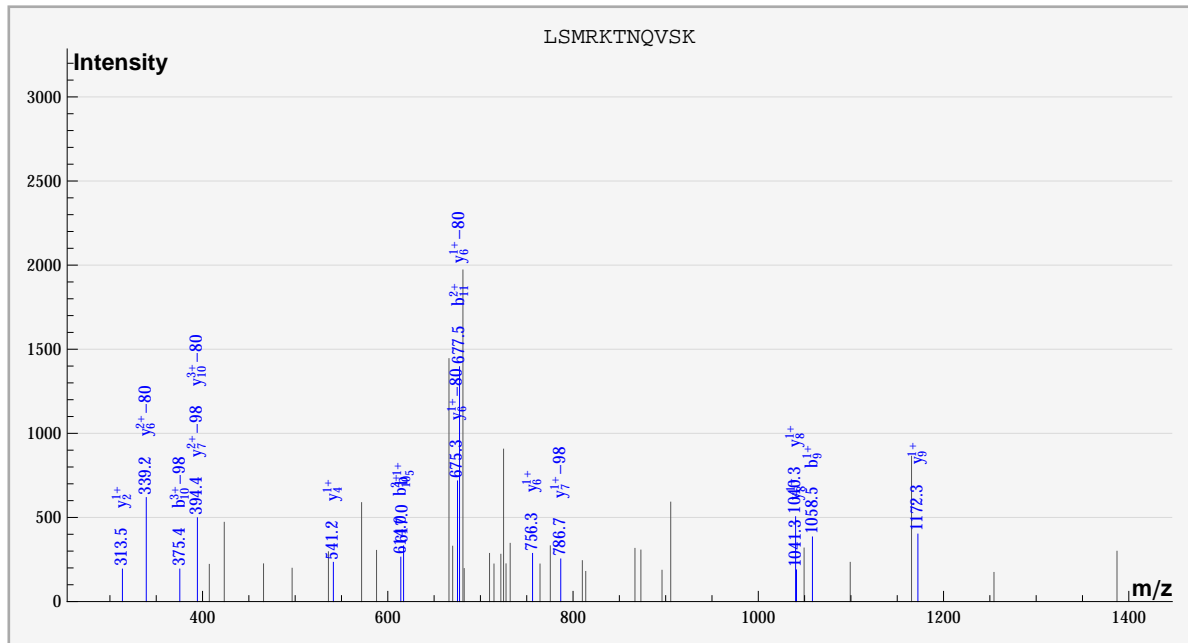

|   | #  | b | b* | #  | y | y* | P | P* |
|---|----|---|----|----|---|----|---|----|
| L | 1  |   |    |    |   |    |   |    |
| S | 2  |   |    | 10 |   | ✓  |   |    |
| M | 3  |   |    | 9  | ✓ |    |   |    |
| R | 4  |   |    | 8  | ✓ |    |   |    |
| K | 5  | ✓ |    | 7  |   | ✓  |   |    |
| T | 6  |   |    | 6  | ✓ | ✓  |   |    |
| N | 7  |   |    | 5  |   |    |   |    |
| Q | 8  |   |    | 4  | ✓ |    |   |    |
| V | 9  | ✓ |    | 3  |   |    |   |    |
| S | 10 | ✓ | ✓  | 2  | ✓ |    |   |    |
| K | 11 | ✓ |    | 1  |   |    |   |    |

L [ S [ M [ R [ K ] T N [ Q V [ S ] K ]

dbValid true IYKYGATYSPK PHOS(1) 2. 687. -1.17678 5.28141 100. ? 2172.  
 S\_Acido\_new%gi|68568042|gb|AAy80971.1| IYKYGATYSPK%::PHOS:::sample\_3%compd\_853

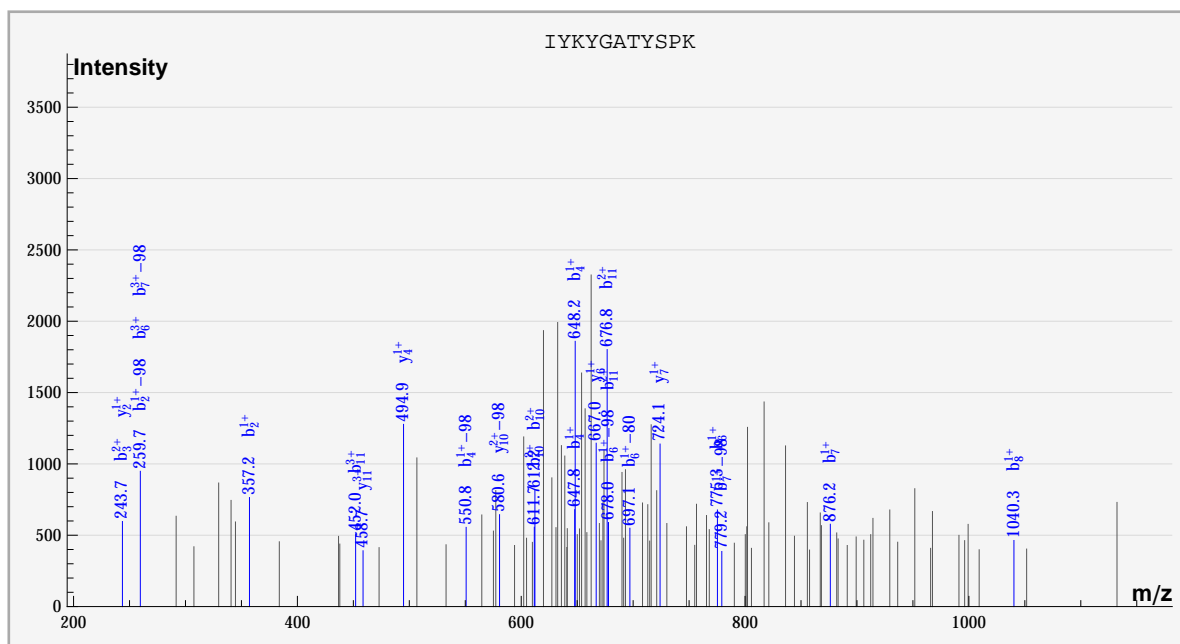

|   | #  | b | b* | #  | y | y* | P | P* |
|---|----|---|----|----|---|----|---|----|
| I | 1  |   |    |    |   |    |   | ✓  |
| Y | 2  | ✓ | ✓  | 10 |   | ✓  |   |    |
| K | 3  | ✓ |    | 9  |   |    |   |    |
| Y | 4  | ✓ | ✓  | 8  |   |    |   |    |
| G | 5  |   |    | 7  |   | ✓  |   |    |
| A | 6  | ✓ | ✓  | 6  |   | ✓  |   |    |
| T | 7  | ✓ | ✓  | 5  |   |    |   |    |
| Y | 8  | ✓ |    | 4  |   | ✓  |   |    |
| S | 9  |   |    | 3  |   |    |   |    |
| P | 10 | ✓ |    | 2  |   | ✓  |   |    |
| K | 11 | ✓ |    | 1  |   |    |   |    |

I Y K Y G A T Y S P K



dbValid true LLPTMTTGSSKR PHOS(1) 2. 688. -1.66128 5.13711 100. ? 2640.  
 S\_Acido\_new%gi|68568308|gb|AAY81237.1| LLPTMTTGSSKR%:::::PHOS::::%sample\_3%compd\_1284

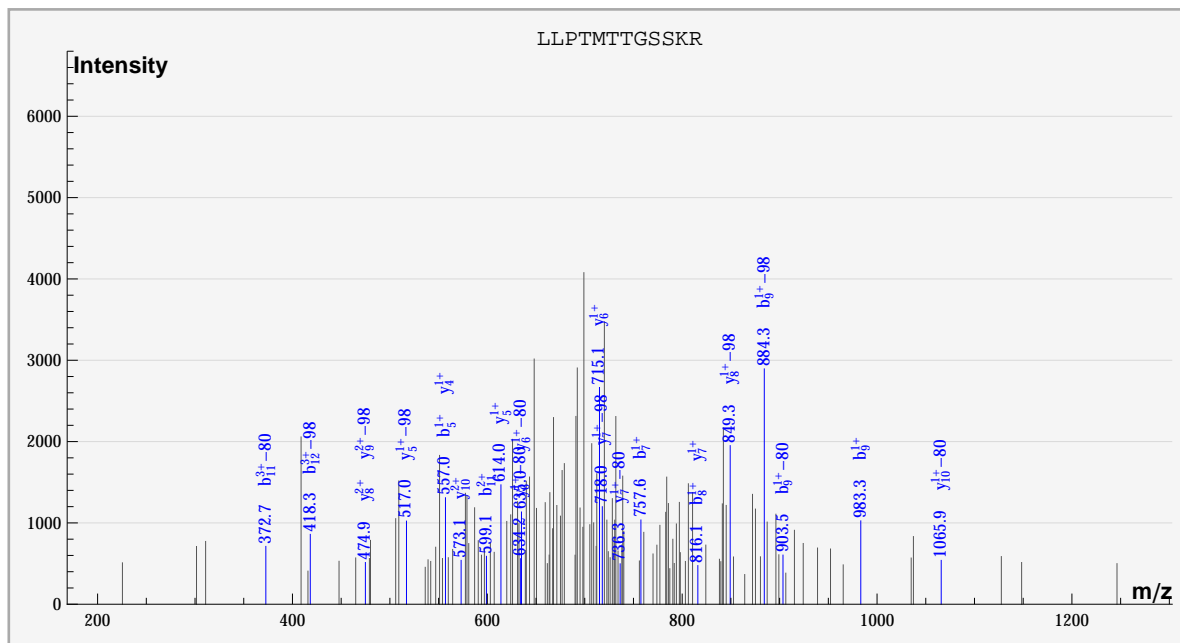

|   | #  | b | b* | #  | y | y* | P | P* |
|---|----|---|----|----|---|----|---|----|
| L | 1  |   |    |    |   |    |   |    |
| L | 2  |   |    | 11 |   |    |   |    |
| P | 3  |   |    | 10 | ✓ | ✓  |   |    |
| T | 4  |   |    | 9  |   | ✓  |   |    |
| M | 5  | ✓ |    | 8  | ✓ | ✓  |   |    |
| T | 6  |   |    | 7  | ✓ | ✓  |   |    |
| T | 7  | ✓ |    | 6  | ✓ | ✓  |   |    |
| G | 8  | ✓ |    | 5  | ✓ | ✓  |   |    |
| S | 9  | ✓ | ✓  | 4  | ✓ |    |   |    |
| S | 10 |   |    | 3  |   |    |   |    |
| K | 11 | ✓ | ✓  | 2  |   |    |   |    |
| R | 12 |   | ✓  | 1  |   |    |   |    |

L L P T M T T G S S K R





dbValid true YDIAIALYAER PHOS(1) 2. 688. 1.32612 5.00794 100. ? 3474.  
 S\_Acido\_new%gi|68568419|gb|AAy81348.1| YDIAIALYAER%:PHOS:.....:sample\_3%cmpd\_2047

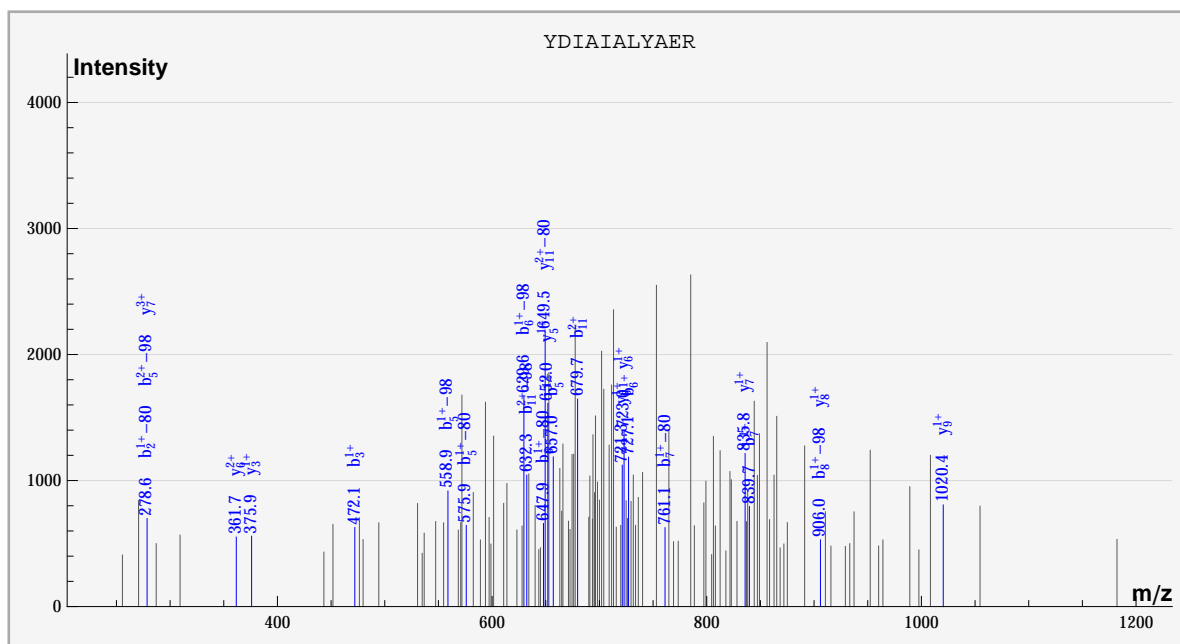

|   | #  | b | b* | #  | y | y* | P | P* |
|---|----|---|----|----|---|----|---|----|
| Y | 1  |   |    |    |   |    |   | ✓  |
| D | 2  |   | ✓  | 10 |   |    |   |    |
| I | 3  | ✓ |    | 9  | ✓ |    |   |    |
| A | 4  |   |    | 8  | ✓ |    |   |    |
| I | 5  | ✓ | ✓  | 7  | ✓ |    |   |    |
| A | 6  | ✓ | ✓  | 6  | ✓ |    |   |    |
| L | 7  | ✓ | ✓  | 5  | ✓ |    |   |    |
| Y | 8  |   | ✓  | 4  |   |    |   |    |
| A | 9  |   |    | 3  | ✓ |    |   |    |
| E | 10 |   |    | 2  |   |    |   |    |
| R | 11 | ✓ | ✓  | 1  |   |    |   |    |

Y D I A I A L Y A E R

dbValid true RGDVIYEINSK PHOS(1) 2. 689. -1.67334 5.69718 100. ? 1314.  
 S\_Acido\_new%gi68567452|gb|AAY80381.1| RGDVIYEINSK%:.....PHOS::%sample\_1%cmpd\_81

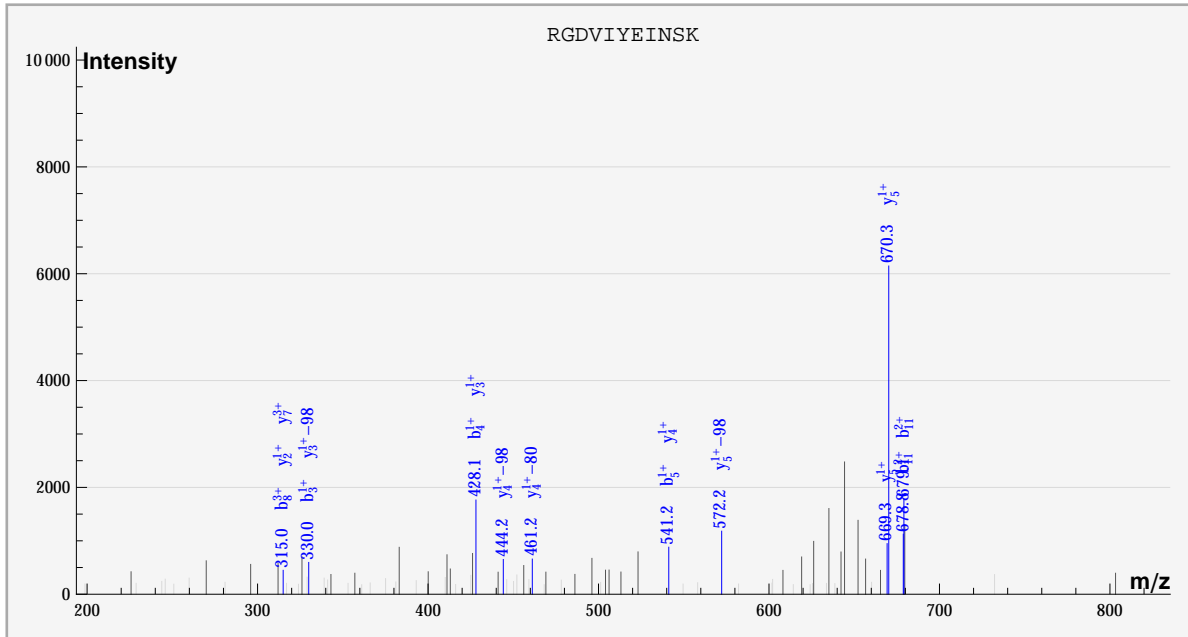

|   | #  | b | b* | #  | y | y* | P | P* |
|---|----|---|----|----|---|----|---|----|
| R | 1  |   |    |    |   |    |   |    |
| G | 2  |   |    | 10 |   |    |   |    |
| D | 3  | ✓ |    | 9  |   |    |   |    |
| V | 4  | ✓ |    | 8  |   |    |   |    |
| I | 5  | ✓ |    | 7  | ✓ |    |   |    |
| Y | 6  |   |    | 6  |   |    |   |    |
| E | 7  |   |    | 5  | ✓ | ✓  |   |    |
| I | 8  | ✓ |    | 4  | ✓ | ✓  |   |    |
| N | 9  |   |    | 3  | ✓ | ✓  |   |    |
| S | 10 |   |    | 2  | ✓ |    |   |    |
| K | 11 | ✓ |    | 1  |   |    |   |    |

R G D V I Y E I N S K

dbValid true RGDVIYEINSK PHOS(1) 2. 689. -1.67334 5.26241 100. ? 1326.  
 S\_Acido\_new%gi|68567452|gb|AAV80381.1| RGDVIYEINSK%:::PHOS::%sample\_1%cmpd\_91

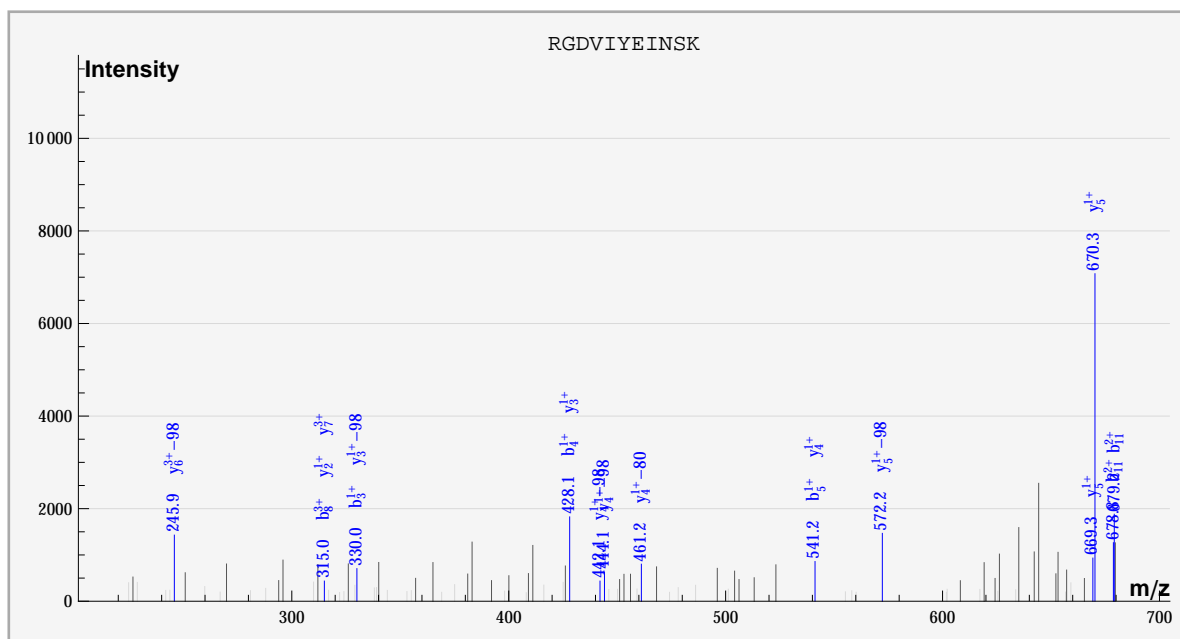

|   | #  | b | b* | #  | y | y* | P | P* |
|---|----|---|----|----|---|----|---|----|
| R | 1  |   |    |    |   |    |   |    |
| G | 2  |   |    | 10 |   |    |   |    |
| D | 3  | ✓ |    | 9  |   |    |   |    |
| V | 4  | ✓ |    | 8  |   |    |   |    |
| I | 5  | ✓ |    | 7  | ✓ |    |   |    |
| Y | 6  |   |    | 6  |   | ✓  |   |    |
| E | 7  |   |    | 5  | ✓ | ✓  |   |    |
| I | 8  | ✓ |    | 4  | ✓ | ✓  |   |    |
| N | 9  |   |    | 3  | ✓ | ✓  |   |    |
| S | 10 |   |    | 2  | ✓ |    |   |    |
| K | 11 | ✓ |    | 1  |   |    |   |    |

R G D V I Y E I N S K

dbValid true RGDVIYEINSK PHOS(1) 2. 689. -1.67334 5.22355 100. ? 1338.  
 S\_Acido\_new%gi|68567452|gb|AAV80381.1| RGDVIYEINSK%:.....PHOS::%sample\_1%cmpd\_101

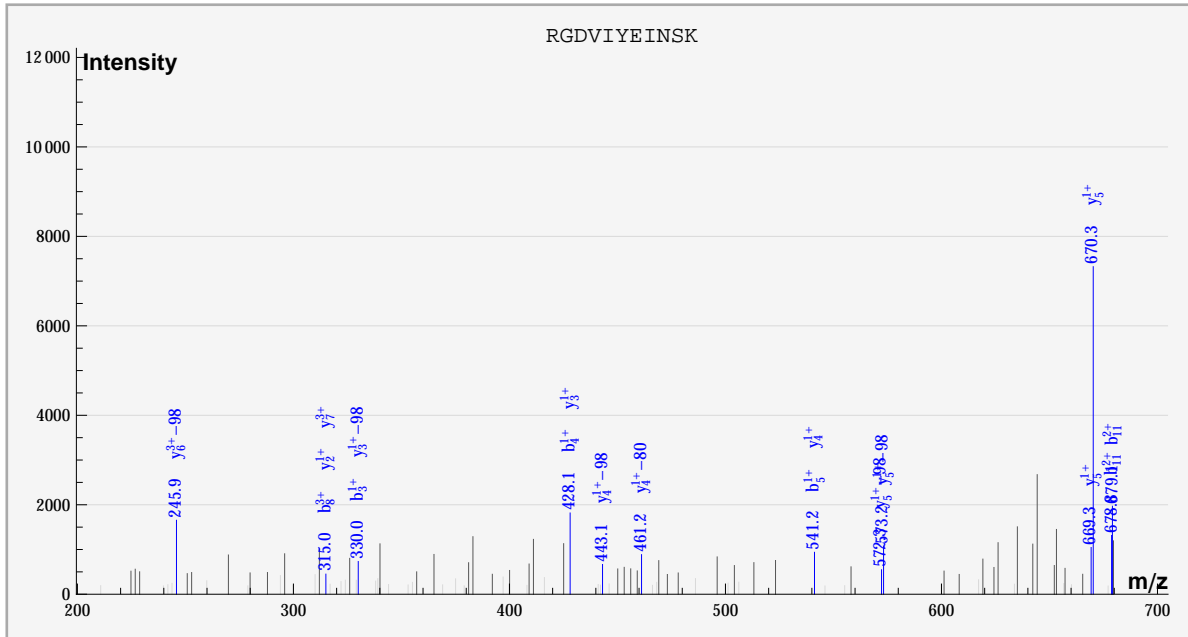

|   | #  | b | b* | #  | y | y* | P | P* |
|---|----|---|----|----|---|----|---|----|
| R | 1  |   |    |    |   |    |   |    |
| G | 2  |   |    | 10 |   |    |   |    |
| D | 3  | ✓ |    | 9  |   |    |   |    |
| V | 4  | ✓ |    | 8  |   |    |   |    |
| I | 5  | ✓ |    | 7  | ✓ |    |   |    |
| Y | 6  |   |    | 6  |   | ✓  |   |    |
| E | 7  |   |    | 5  | ✓ | ✓  |   |    |
| I | 8  | ✓ |    | 4  | ✓ | ✓  |   |    |
| N | 9  |   |    | 3  | ✓ | ✓  |   |    |
| S | 10 |   |    | 2  | ✓ |    |   |    |
| K | 11 | ✓ |    | 1  |   |    |   |    |

R G D V I Y E I N S K

dbValid true RGDVIYEINSK PHOS(1) 2. 689. -1.67334 5.38235 100. ? 1350.  
 S\_Acido\_new%gi|68567452|gb|AAV80381.1| RGDVIYEINSK%:.....PHOS::%sample\_1%cmpd\_111

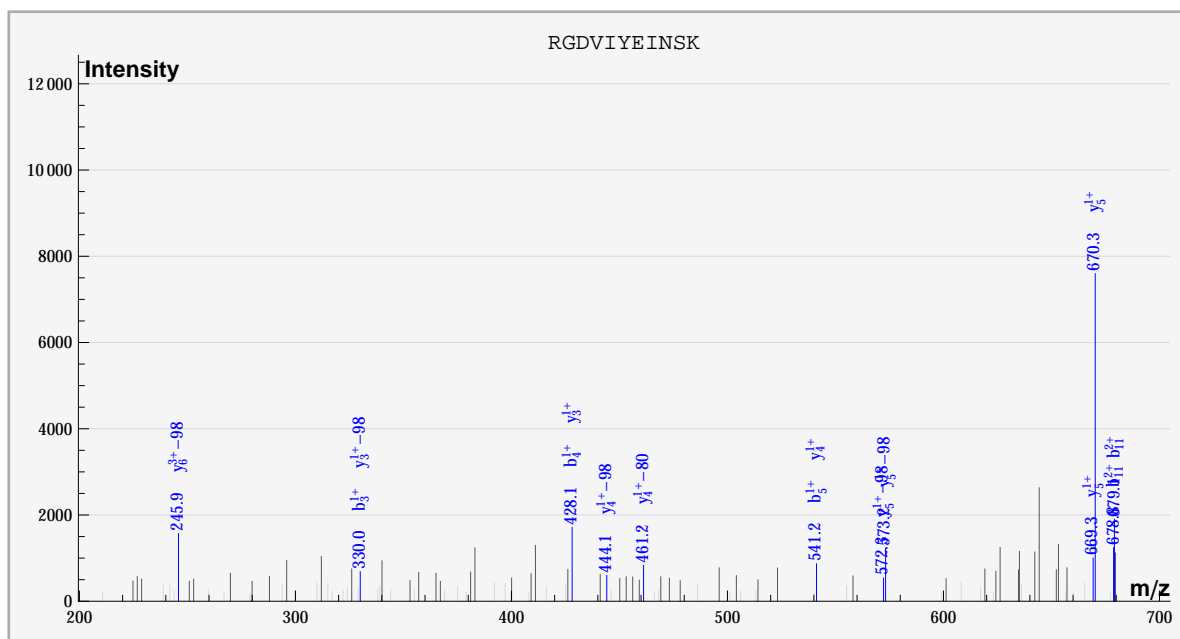

|   | #  | b | b* | #  | y | y* | P | P* |
|---|----|---|----|----|---|----|---|----|
| R | 1  |   |    |    |   |    |   |    |
| G | 2  |   |    | 10 |   |    |   |    |
| D | 3  | ✓ |    | 9  |   |    |   |    |
| V | 4  | ✓ |    | 8  |   |    |   |    |
| I | 5  | ✓ |    | 7  |   |    |   |    |
| Y | 6  |   |    | 6  |   | ✓  |   |    |
| E | 7  |   |    | 5  | ✓ | ✓  |   |    |
| I | 8  |   |    | 4  | ✓ | ✓  |   |    |
| N | 9  |   |    | 3  | ✓ | ✓  |   |    |
| S | 10 |   |    | 2  |   |    |   |    |
| K | 11 | ✓ |    | 1  |   |    |   |    |

R G D V I Y E I N S K

dbValid true RGDVIYEINSK PHOS(1) 2. 689. -1.67334 5.09088 100. ? 1374.  
 S\_Acido\_new%gi|68567452|gb|AA80381.1| RGDVIYEINSK%:.....PHOS::%sample\_1%cmpd\_132

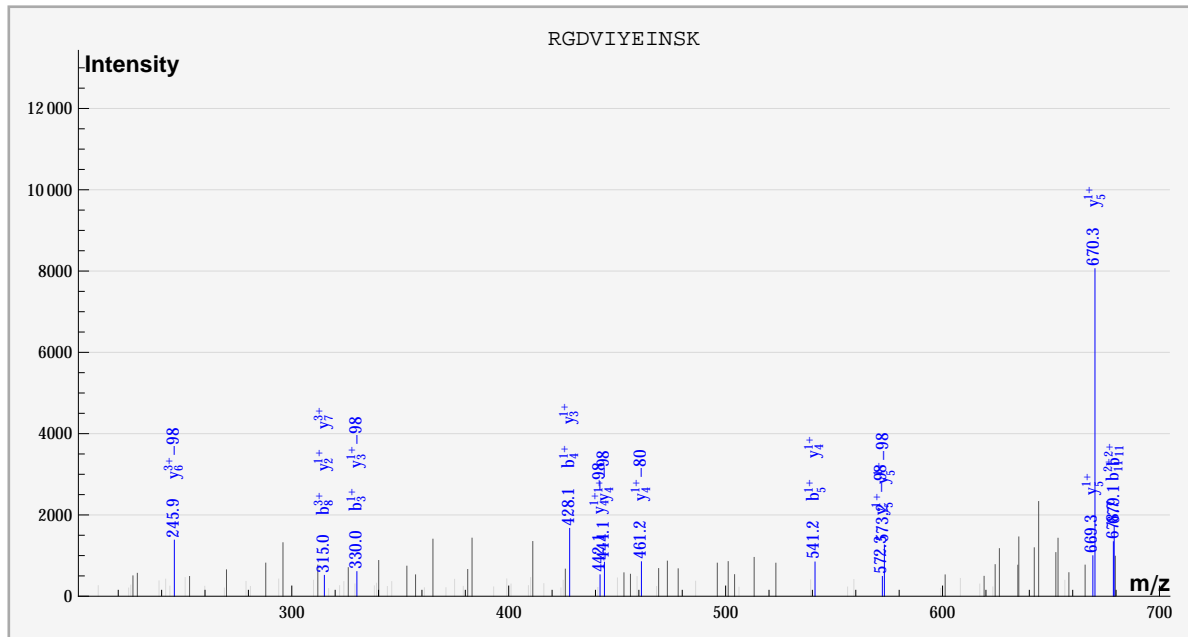

|   | #  | b | b* | #  | y | y* | P | P* |
|---|----|---|----|----|---|----|---|----|
| R | 1  |   |    |    |   |    |   |    |
| G | 2  |   |    | 10 |   |    |   |    |
| D | 3  | ✓ |    | 9  |   |    |   |    |
| V | 4  | ✓ |    | 8  |   |    |   |    |
| I | 5  | ✓ |    | 7  | ✓ |    |   |    |
| Y | 6  |   |    | 6  |   | ✓  |   |    |
| E | 7  |   |    | 5  | ✓ | ✓  |   |    |
| I | 8  | ✓ |    | 4  | ✓ | ✓  |   |    |
| N | 9  |   |    | 3  | ✓ | ✓  |   |    |
| S | 10 |   |    | 2  | ✓ |    |   |    |
| K | 11 | ✓ |    | 1  |   |    |   |    |

R G D V I Y E I N S K

dbValid true RGDVIYEINSK PHOS(1) 2. 689. -1.67334 5.24088 100. ? 1386.  
 S\_Acido\_new%gi|68567452|gb|AAV80381.1| RGDVIYEINSK%:.....PHOS::%sample\_1%cmpd\_142

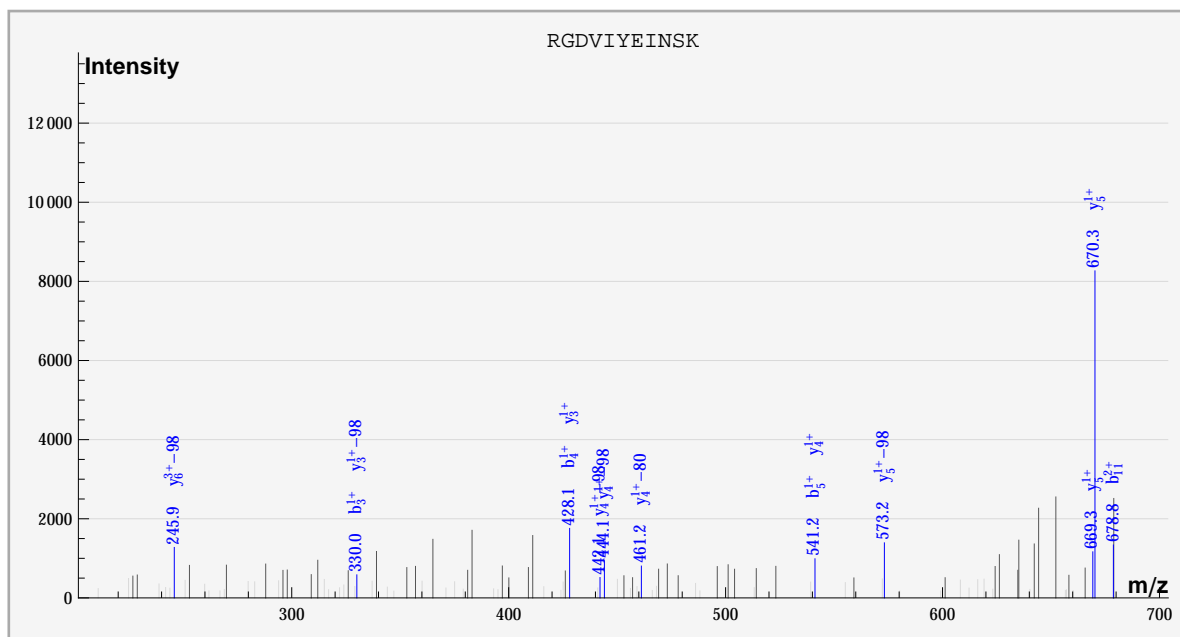

|   | #  | b | b* | #  | y | y* | P | P* |
|---|----|---|----|----|---|----|---|----|
| R | 1  |   |    |    |   |    |   |    |
| G | 2  |   |    | 10 |   |    |   |    |
| D | 3  | ✓ |    | 9  |   |    |   |    |
| V | 4  | ✓ |    | 8  |   |    |   |    |
| I | 5  | ✓ |    | 7  |   |    |   |    |
| Y | 6  |   |    | 6  |   | ✓  |   |    |
| E | 7  |   |    | 5  | ✓ | ✓  |   |    |
| I | 8  |   |    | 4  | ✓ | ✓  |   |    |
| N | 9  |   |    | 3  | ✓ | ✓  |   |    |
| S | 10 |   |    | 2  |   |    |   |    |
| K | 11 | ✓ |    | 1  |   |    |   |    |

R G D V I Y E I N S K



dbValid true RGDVIYEINSK PHOS(1) 2. 689. -1.67334 4.98414 100. ? 1434.  
 S\_Acido\_new%gi|68567452|gb|AAy80381.1| RGDVIYEINSK%:.....PHOS::%sample\_1%cmpd\_182

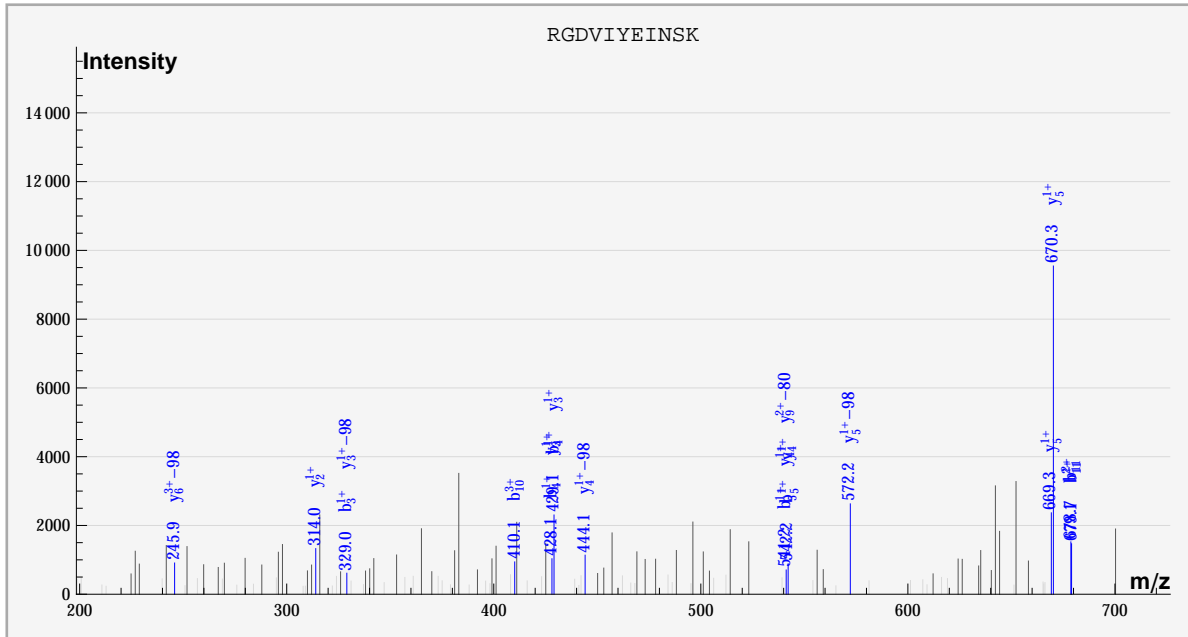

|   | #  | b | b* | #  | y | y* | P | P* |
|---|----|---|----|----|---|----|---|----|
| R | 1  |   |    |    |   |    |   |    |
| G | 2  |   |    | 10 |   |    |   |    |
| D | 3  | ✓ |    | 9  |   | ✓  |   |    |
| V | 4  | ✓ |    | 8  |   |    |   |    |
| I | 5  | ✓ |    | 7  |   |    |   |    |
| Y | 6  |   |    | 6  |   | ✓  |   |    |
| E | 7  |   |    | 5  | ✓ | ✓  |   |    |
| I | 8  |   |    | 4  | ✓ | ✓  |   |    |
| N | 9  |   |    | 3  | ✓ | ✓  |   |    |
| S | 10 | ✓ |    | 2  | ✓ |    |   |    |
| K | 11 | ✓ |    | 1  |   |    |   |    |

R G [D] V [I] Y [E] [I] [N] [S] K [ ]

dbValid true RGDVIYEINSK PHOS(1) 2. 689. -1.67334 5.18115 100. ? 1482.  
 S\_Acido\_new%gi|68567452|gb|AA80381.1| RGDVIYEINSK%:.....PHOS::%sample\_1%cmpd\_223

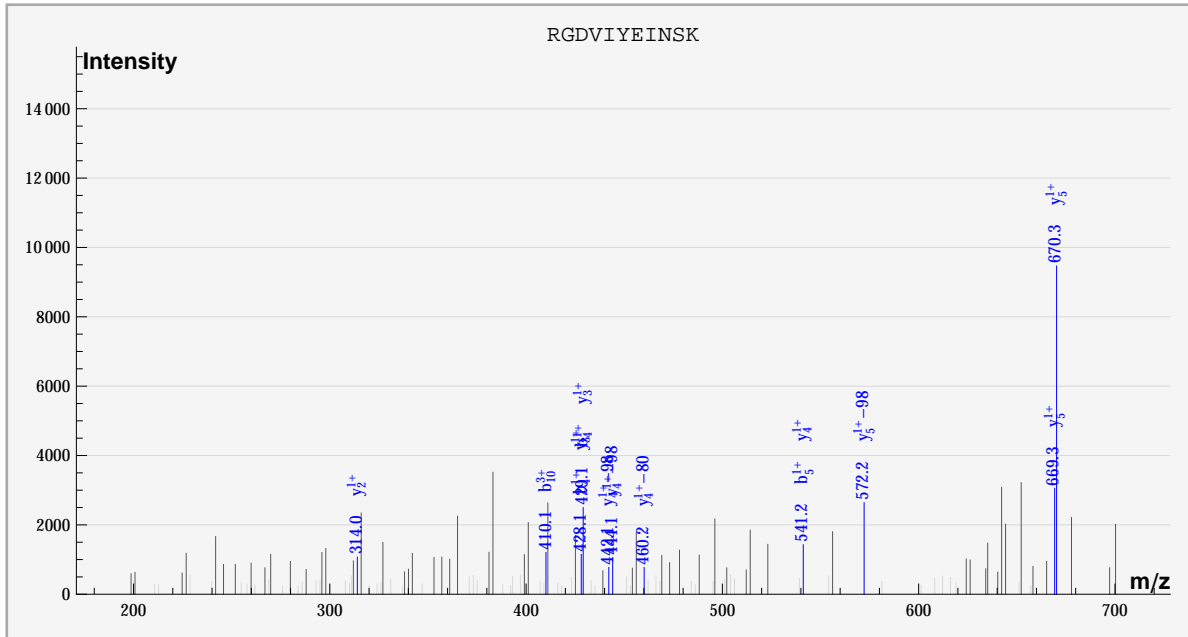

|   | #  | b | b* | #  | y | y* | P | P* |
|---|----|---|----|----|---|----|---|----|
| R | 1  |   |    |    |   |    |   |    |
| G | 2  |   |    | 10 |   |    |   |    |
| D | 3  |   |    | 9  |   |    |   |    |
| V | 4  | ✓ |    | 8  |   |    |   |    |
| I | 5  | ✓ |    | 7  |   |    |   |    |
| Y | 6  |   |    | 6  |   |    |   |    |
| E | 7  |   |    | 5  | ✓ | ✓  |   |    |
| I | 8  |   |    | 4  | ✓ | ✓  |   |    |
| N | 9  |   |    | 3  | ✓ |    |   |    |
| S | 10 | ✓ |    | 2  | ✓ |    |   |    |
| K | 11 |   |    | 1  |   |    |   |    |

R G D V I Y E I N S K

dbValid true RGDVIYEINSK PHOS(1) 2. 689. -1.67334 5.1062 100. ? 1506.  
 S\_Acido\_new%gil68567452|gb|AAy80381.1| RGDVIYEINSK%:.....PHOS::%sample\_1%cmpd\_244

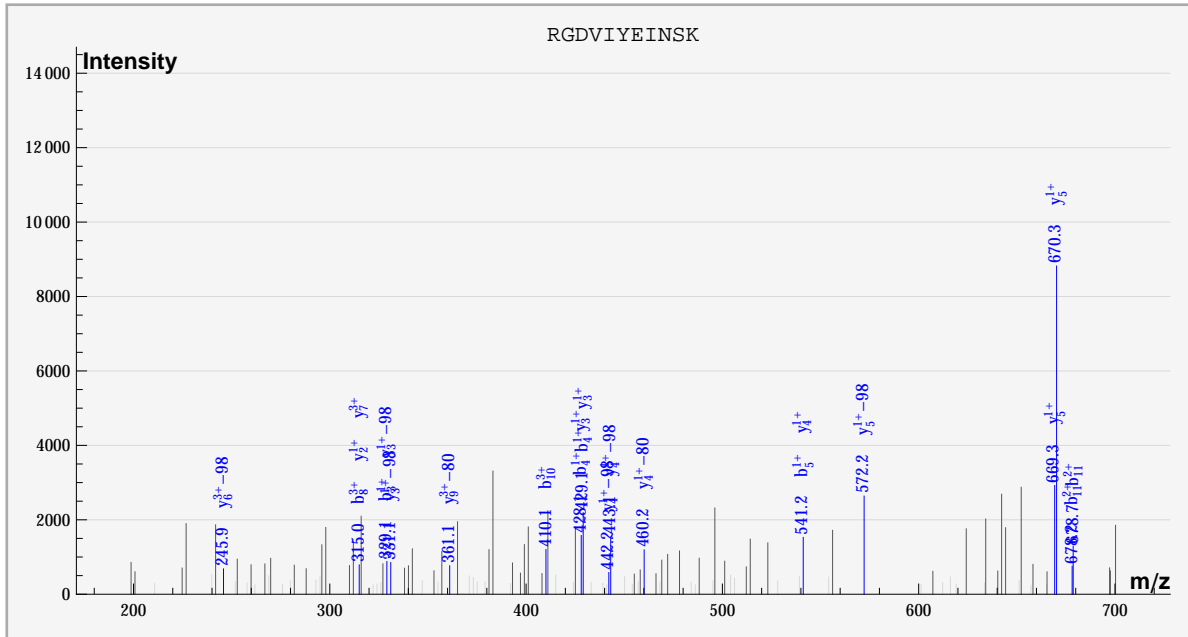

|   | #  | b | b* | #  | y | y* | P | P* |
|---|----|---|----|----|---|----|---|----|
| R | 1  |   |    |    |   |    |   |    |
| G | 2  |   |    | 10 |   |    |   |    |
| D | 3  | ✓ |    | 9  |   | ✓  |   |    |
| V | 4  | ✓ |    | 8  |   |    |   |    |
| I | 5  | ✓ |    | 7  | ✓ |    |   |    |
| Y | 6  |   |    | 6  |   | ✓  |   |    |
| E | 7  |   |    | 5  | ✓ | ✓  |   |    |
| I | 8  | ✓ |    | 4  | ✓ | ✓  |   |    |
| N | 9  |   |    | 3  | ✓ | ✓  |   |    |
| S | 10 | ✓ |    | 2  | ✓ |    |   |    |
| K | 11 | ✓ |    | 1  |   |    |   |    |

R G [D] V [I] [Y] [E] [I] [N] [S] [K]

dbValid true RGDVIYEINSK PHOS(1) 2. 689. -1.67334 5.69456 100. ? 1518.  
 S\_Acido\_new%gi|68567452|gb|AAV80381.1| RGDVIYEINSK%:.....PHOS::%sample\_1%cmpd\_254

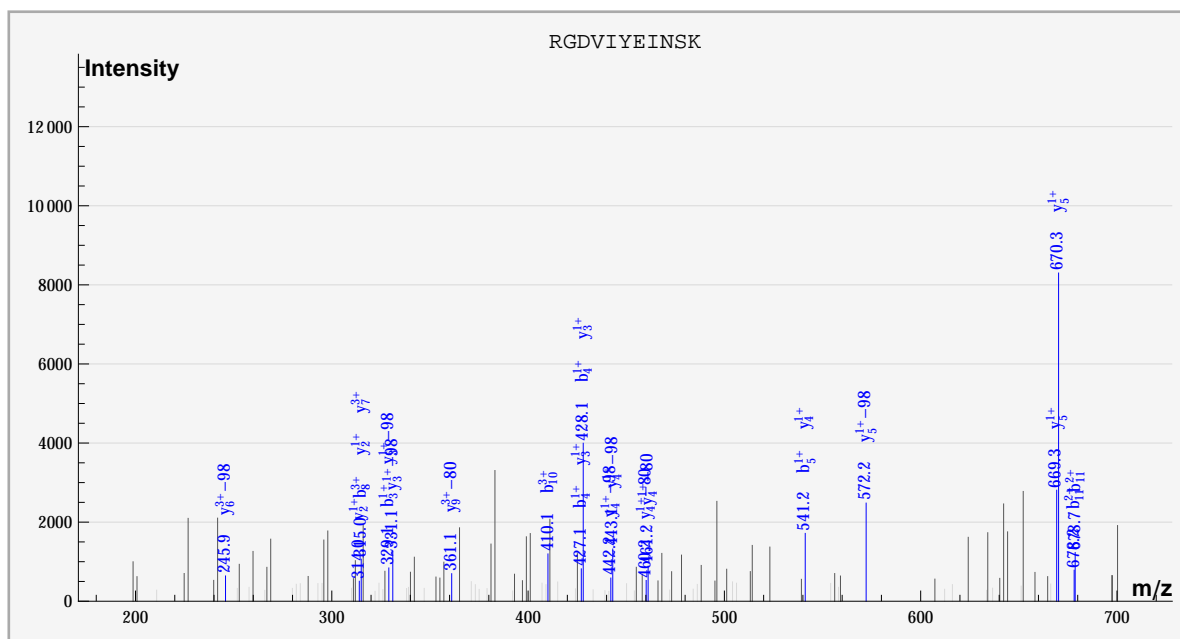

|   | #  | b | b* | #  | y | y* | P | P* |
|---|----|---|----|----|---|----|---|----|
| R | 1  |   |    |    |   |    |   |    |
| G | 2  |   |    | 10 |   |    |   |    |
| D | 3  | ✓ |    | 9  |   | ✓  |   |    |
| V | 4  | ✓ |    | 8  |   |    |   |    |
| I | 5  | ✓ |    | 7  |   | ✓  |   |    |
| Y | 6  |   |    | 6  |   | ✓  |   |    |
| E | 7  |   |    | 5  |   | ✓  | ✓ |    |
| I | 8  | ✓ |    | 4  |   | ✓  | ✓ |    |
| N | 9  |   |    | 3  |   | ✓  | ✓ |    |
| S | 10 | ✓ |    | 2  |   | ✓  |   |    |
| K | 11 | ✓ |    | 1  |   |    |   |    |

R G [D] V [I] [Y] [E] [I] [N] [S] [K]

dbValid true RGDVIYEINSK PHOS(1) 2. 689. -1.67334 6.40558 100. ? 1530.  
 S\_Acido\_new%gi|68567452|gb|AAy80381.1| RGDVIYEINSK%:.....PHOS::%sample\_1%cmpd\_264

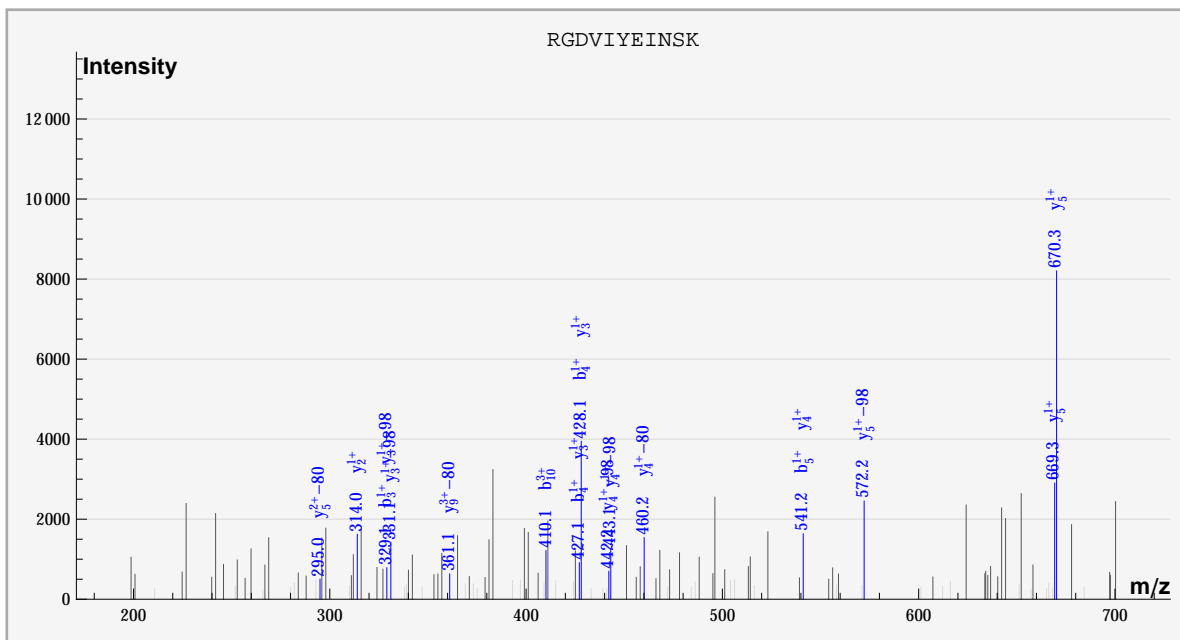

|   | #  | b | b* | #  | y | y* | P | P* |
|---|----|---|----|----|---|----|---|----|
| R | 1  |   |    |    |   |    |   |    |
| G | 2  |   |    | 10 |   |    |   |    |
| D | 3  | ✓ |    | 9  |   | ✓  |   |    |
| V | 4  | ✓ |    | 8  |   |    |   |    |
| I | 5  | ✓ |    | 7  |   |    |   |    |
| Y | 6  |   |    | 6  |   |    |   |    |
| E | 7  |   |    | 5  | ✓ | ✓  |   |    |
| I | 8  |   |    | 4  | ✓ | ✓  |   |    |
| N | 9  |   |    | 3  | ✓ | ✓  |   |    |
| S | 10 | ✓ |    | 2  | ✓ |    |   |    |
| K | 11 |   |    | 1  |   |    |   |    |

R G [ D ] V [ I ] Y [ E ] [ I ] [ N ] [ S ] K

dbValid true RGDVIYEINSK PHOS(1) 2. 689. -1.67334 6.06783 100. ? 1542.  
 S\_Acido\_new%gi|68567452|gb|AA80381.1| RGDVIYEINSK%:::PHOS::%sample\_1%cmpd\_274

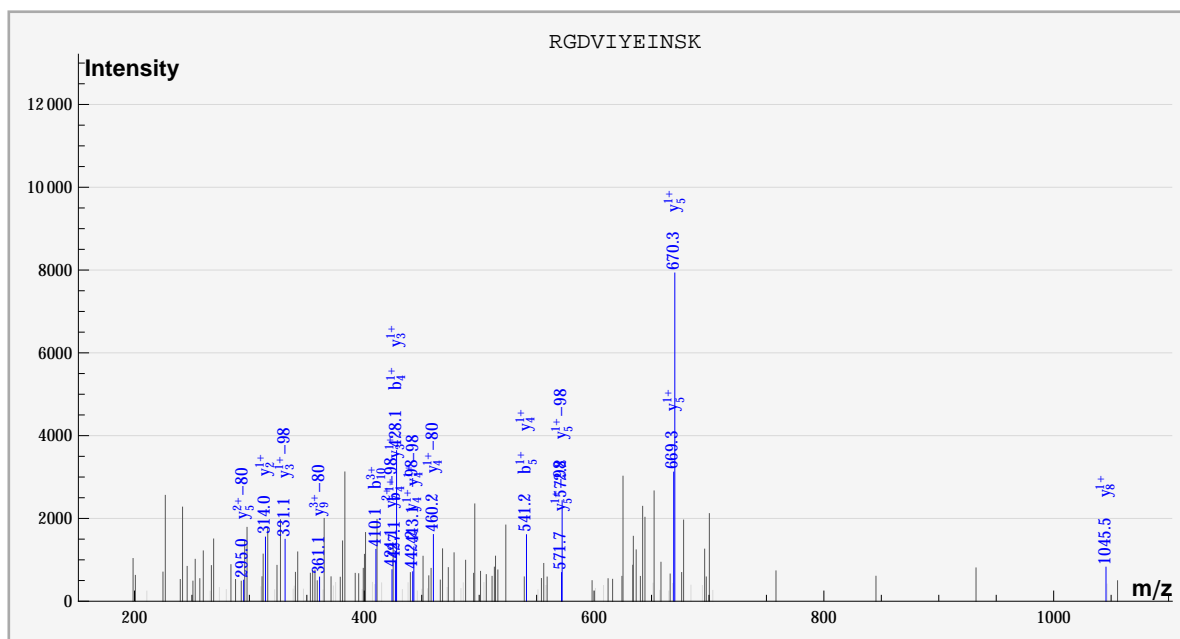

|   | #  | b | b* | #  | y | y* | P | P* |
|---|----|---|----|----|---|----|---|----|
| R | 1  |   |    |    |   |    |   |    |
| G | 2  |   |    | 10 |   |    |   |    |
| D | 3  |   |    | 9  |   | ✓  |   |    |
| V | 4  | ✓ |    | 8  | ✓ |    |   |    |
| I | 5  | ✓ |    | 7  |   | ✓  |   |    |
| Y | 6  |   |    | 6  |   |    |   |    |
| E | 7  |   |    | 5  | ✓ | ✓  |   |    |
| I | 8  |   |    | 4  | ✓ | ✓  |   |    |
| N | 9  |   |    | 3  | ✓ | ✓  |   |    |
| S | 10 | ✓ |    | 2  | ✓ |    |   |    |
| K | 11 |   |    | 1  |   |    |   |    |

R G D V I Y E I N S K

dbValid true RGDVIYEINSK PHOS(1) 2. 689. -1.67334 6.10342 100. ? 1554.  
 S\_Acido\_new%gil68567452|gb|AA80381.1| RGDVIYEINSK%:.....PHOS::%sample\_1%cmpd\_284

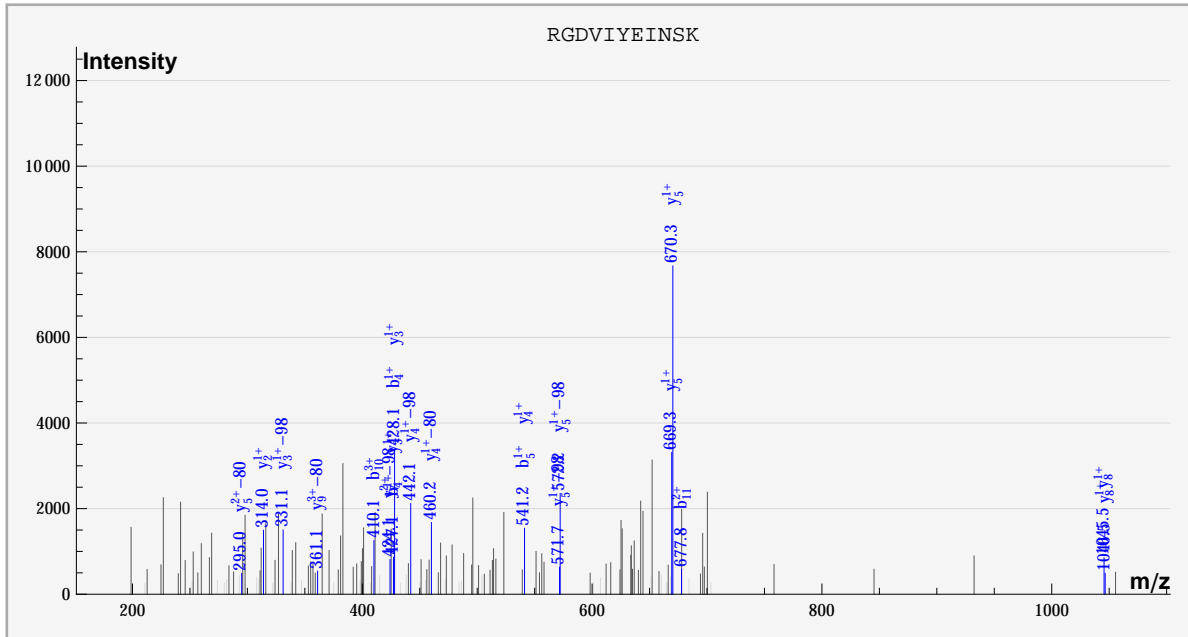

|   | #  | b | b* | #  | y | y* | P | P* |
|---|----|---|----|----|---|----|---|----|
| R | 1  |   |    |    |   |    |   |    |
| G | 2  |   |    | 10 |   |    |   |    |
| D | 3  |   |    | 9  |   | ✓  |   |    |
| V | 4  | ✓ |    | 8  | ✓ |    |   |    |
| I | 5  | ✓ |    | 7  |   | ✓  |   |    |
| Y | 6  |   |    | 6  |   |    |   |    |
| E | 7  |   |    | 5  | ✓ | ✓  |   |    |
| I | 8  |   |    | 4  | ✓ | ✓  |   |    |
| N | 9  |   |    | 3  | ✓ | ✓  |   |    |
| S | 10 | ✓ |    | 2  | ✓ |    |   |    |
| K | 11 | ✓ |    | 1  |   |    |   |    |

R G D V I Y E I N S K

dbValid true GSADMK PHOS(1) 1. 689. -0.762855 5.08652 100. ? 1554.  
 S\_Acido\_new%gi|68568495|gb|AAY81424.1| GSADMK%::PHOS:::sample\_3%compd\_293

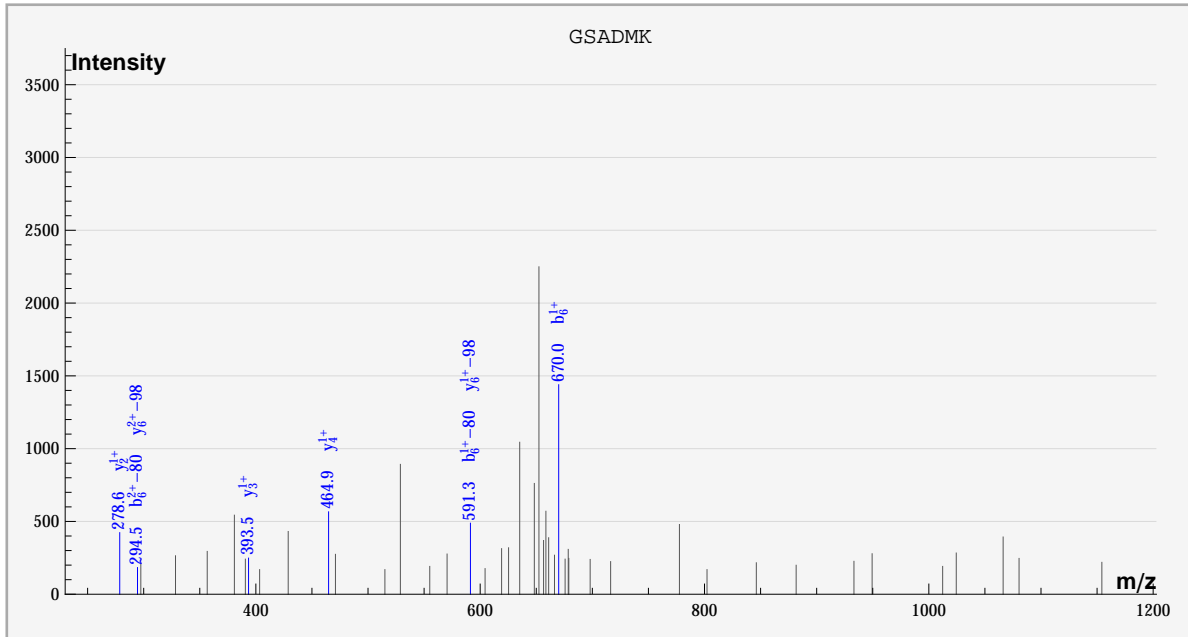

|   | # | b | b* | # | y | y* | P | P* |
|---|---|---|----|---|---|----|---|----|
| G | 1 |   |    |   |   |    |   | ✓  |
| S | 2 |   |    | 5 |   |    |   |    |
| A | 3 |   |    | 4 | ✓ |    |   |    |
| D | 4 |   |    | 3 | ✓ |    |   |    |
| M | 5 |   |    | 2 | ✓ |    |   |    |
| K | 6 | ✓ | ✓  | 1 |   |    |   |    |

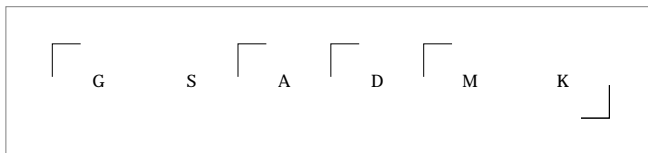



dbValid true RGDVIYEINSK PHOS(1) 2. 689. -1.67334 6.13236 100. ? 1566.  
 S\_Acido\_new%gi|68567452|gb|AA80381.1| RGDVIYEINSK%:::PHOS:::sample\_1%cmpd\_294

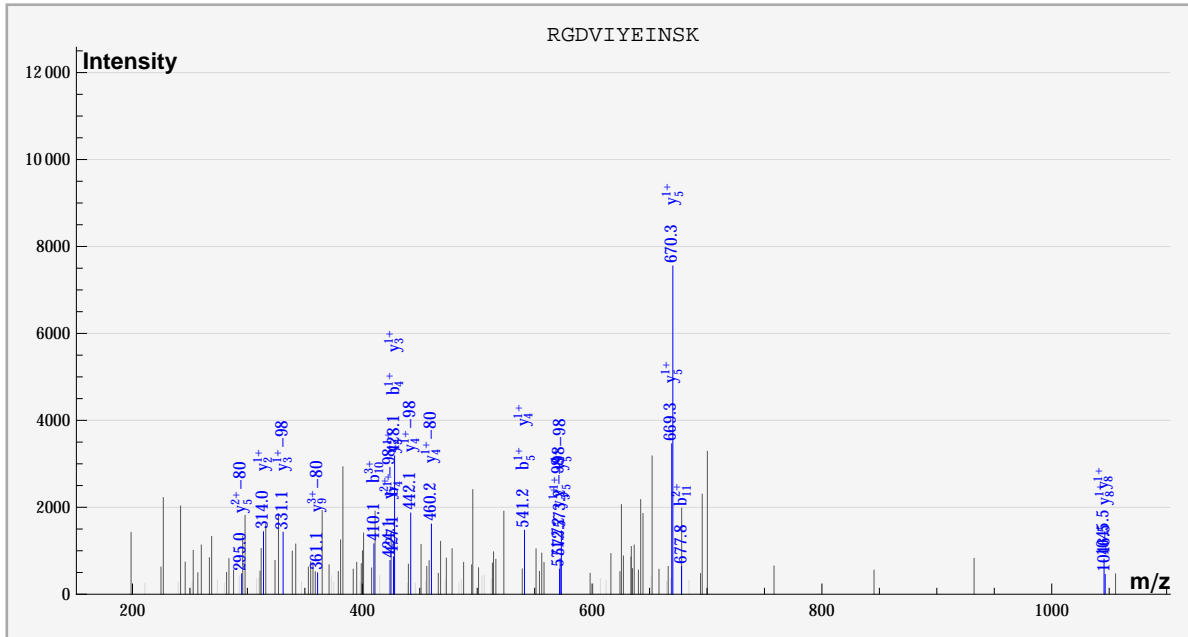

|   | #  | b | b* | #  | y | y* | P | P* |
|---|----|---|----|----|---|----|---|----|
| R | 1  |   |    |    |   |    |   |    |
| G | 2  |   |    | 10 |   |    |   |    |
| D | 3  |   |    | 9  |   | ✓  |   |    |
| V | 4  | ✓ |    | 8  | ✓ |    |   |    |
| I | 5  | ✓ |    | 7  |   | ✓  |   |    |
| Y | 6  |   |    | 6  |   |    |   |    |
| E | 7  |   |    | 5  | ✓ | ✓  |   |    |
| I | 8  |   |    | 4  | ✓ | ✓  |   |    |
| N | 9  |   |    | 3  | ✓ | ✓  |   |    |
| S | 10 | ✓ |    | 2  | ✓ |    |   |    |
| K | 11 | ✓ |    | 1  |   |    |   |    |

R G D V I Y E I N S K

dbValid true RGDVIYEINSK PHOS(1) 2. 689. -1.67334 5.75067 100. ? 1578.  
 S\_Acido\_new%gi|68567452|gb|AA80381.1| RGDVIYEINSK%:::PHOS::%sample\_1%cmpd\_305

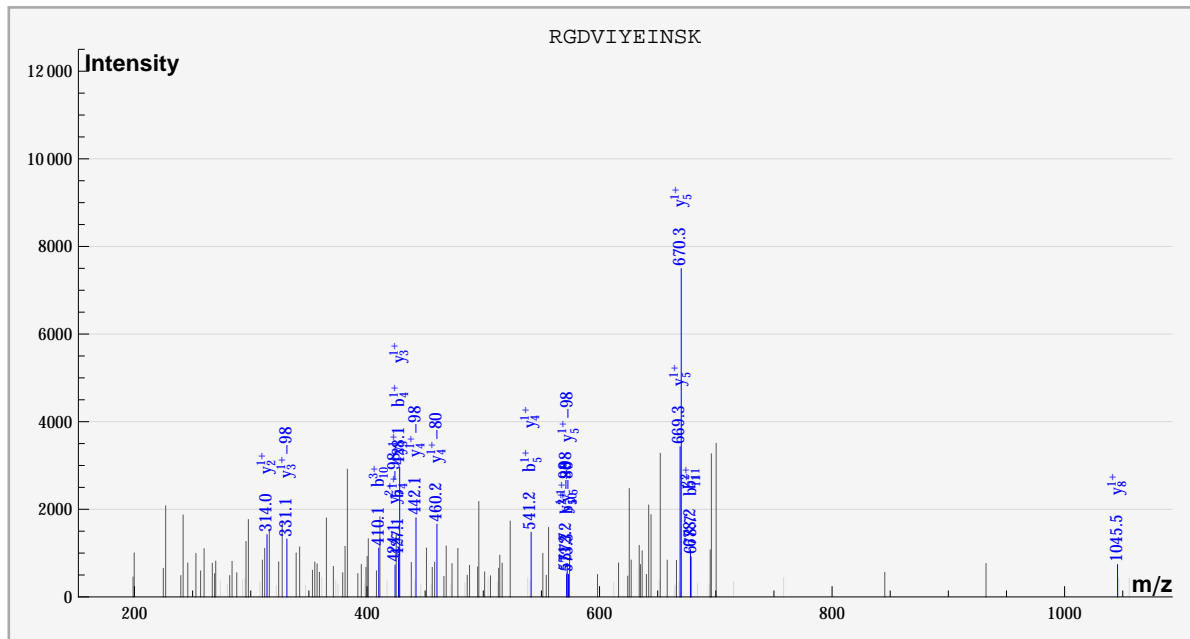

|   | #  | b | b* | #  | y | y* | P | P* |
|---|----|---|----|----|---|----|---|----|
| R | 1  |   |    |    |   |    |   |    |
| G | 2  |   |    | 10 |   |    |   |    |
| D | 3  |   |    | 9  |   |    |   |    |
| V | 4  | ✓ |    | 8  | ✓ |    |   |    |
| I | 5  | ✓ |    | 7  |   | ✓  |   |    |
| Y | 6  |   |    | 6  |   |    |   |    |
| E | 7  |   |    | 5  | ✓ | ✓  |   |    |
| I | 8  |   |    | 4  | ✓ | ✓  |   |    |
| N | 9  |   |    | 3  | ✓ | ✓  |   |    |
| S | 10 | ✓ | ✓  | 2  | ✓ |    |   |    |
| K | 11 | ✓ |    | 1  |   |    |   |    |

R G D V I Y E I N S K

dbValid true RGDVIYEINSK PHOS(1) 2. 689. -1.67334 5.32705 100. ? 1602.  
 S\_Acido\_new%gi|68567452|gb|AA80381.1| RGDVIYEINSK%:.....PHOS::%sample\_1%cmpd\_325

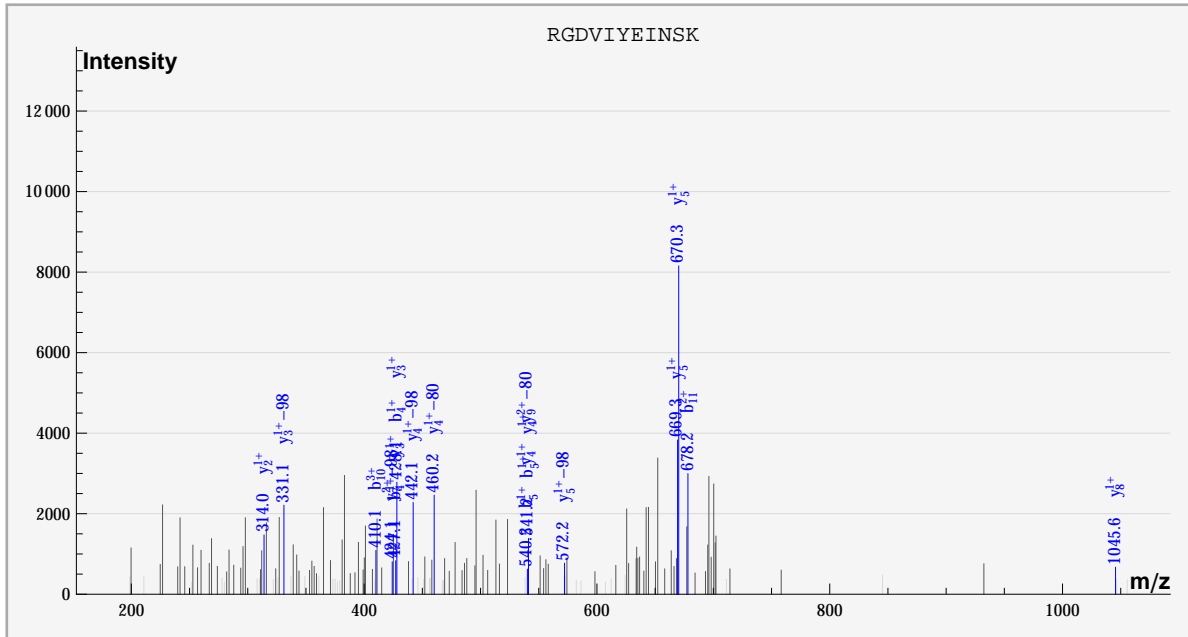

|   | #  | b | b* | #  | y | y* | P | P* |
|---|----|---|----|----|---|----|---|----|
| R | 1  |   |    |    |   |    |   |    |
| G | 2  |   |    | 10 |   |    |   |    |
| D | 3  |   |    | 9  |   | ✓  |   |    |
| V | 4  | ✓ |    | 8  | ✓ |    |   |    |
| I | 5  | ✓ |    | 7  |   | ✓  |   |    |
| Y | 6  |   |    | 6  |   |    |   |    |
| E | 7  |   |    | 5  | ✓ | ✓  |   |    |
| I | 8  |   |    | 4  | ✓ | ✓  |   |    |
| N | 9  |   |    | 3  | ✓ | ✓  |   |    |
| S | 10 | ✓ |    | 2  | ✓ |    |   |    |
| K | 11 | ✓ |    | 1  |   |    |   |    |

R G D V I Y E I N S K

dbValid true RGDVIYEINSK PHOS(1) 2. 689. -1.67334 5.32087 100. ? 1626.  
 S\_Acido\_new%gi|68567452|gb|AAI80381.1| RGDVIYEINSK%:.....PHOS::%sample\_1%cmpd\_346

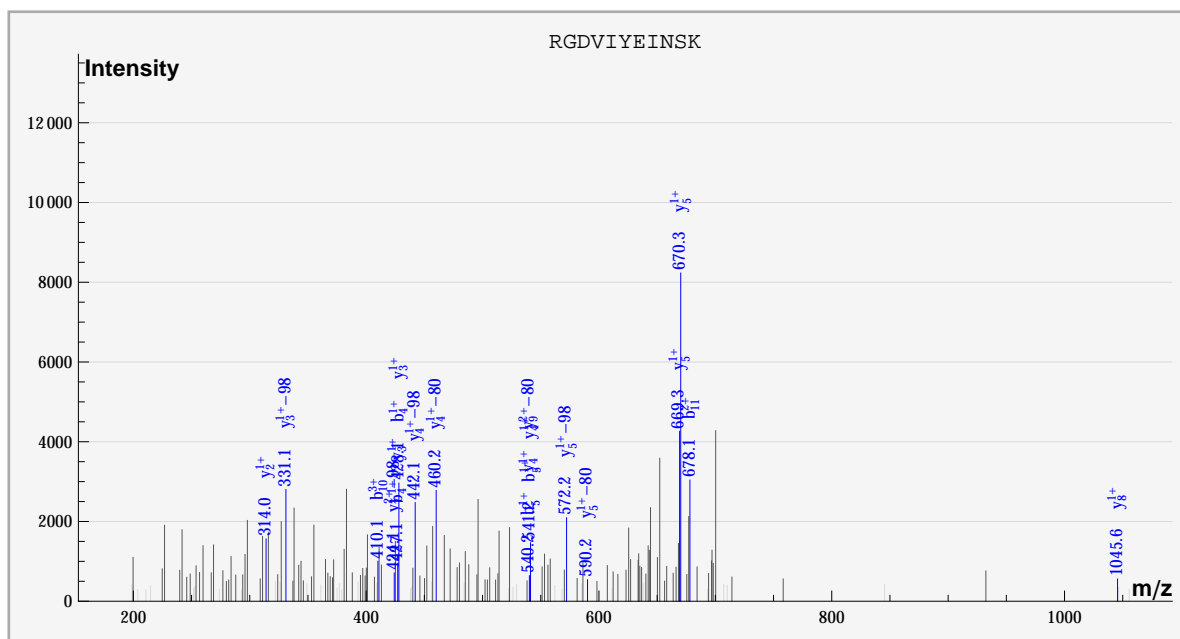

|   | #  | b | b* | #  | y | y* | P | P* |
|---|----|---|----|----|---|----|---|----|
| R | 1  |   |    |    |   |    |   |    |
| G | 2  |   |    | 10 |   |    |   |    |
| D | 3  |   |    | 9  |   | ✓  |   |    |
| V | 4  | ✓ |    | 8  | ✓ |    |   |    |
| I | 5  | ✓ |    | 7  |   | ✓  |   |    |
| Y | 6  |   |    | 6  |   |    |   |    |
| E | 7  |   |    | 5  | ✓ | ✓  |   |    |
| I | 8  |   |    | 4  | ✓ | ✓  |   |    |
| N | 9  |   |    | 3  | ✓ | ✓  |   |    |
| S | 10 | ✓ |    | 2  | ✓ |    |   |    |
| K | 11 | ✓ |    | 1  |   |    |   |    |

R G D V I Y E I N S K

dbValid true RGDVIYEINSK PHOS(1) 2. 689. -1.67334 5.6005 100. ? 1638.

S\_Acido\_new%gi|68567452|gb|AA80381.1| RGDVIYEINSK%:.....PHOS::%sample\_1%cmpd\_356

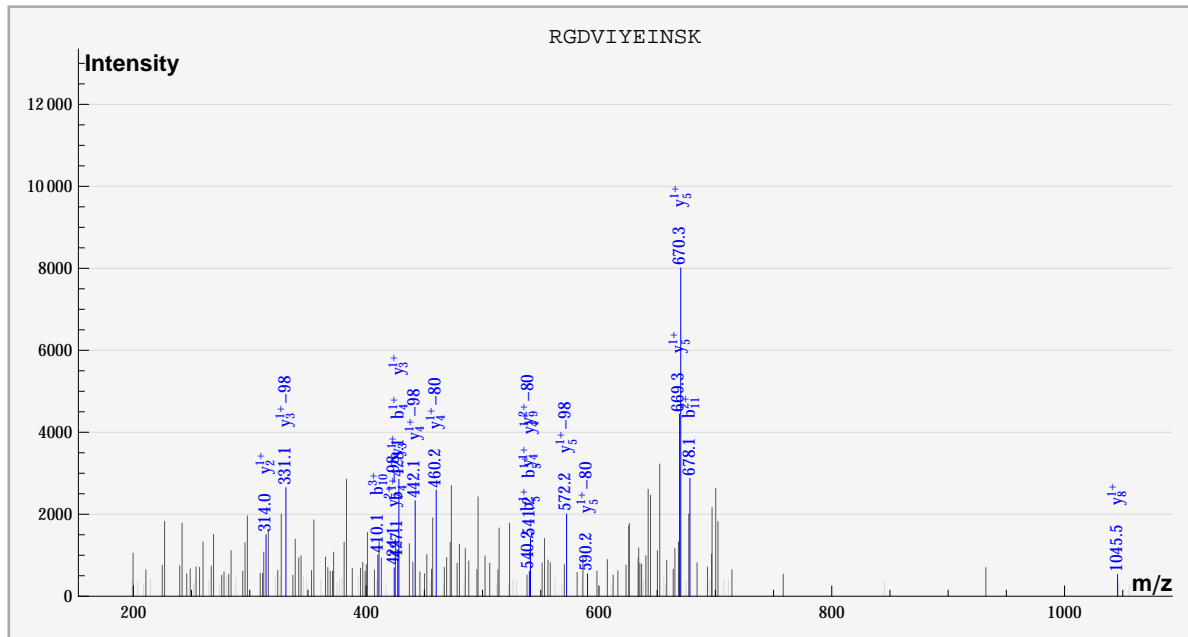

|   | #  | b | b* | #  | y | y* | P | P* |
|---|----|---|----|----|---|----|---|----|
| R | 1  |   |    |    |   |    |   |    |
| G | 2  |   |    | 10 |   |    |   |    |
| D | 3  |   |    | 9  |   | ✓  |   |    |
| V | 4  | ✓ |    | 8  | ✓ |    |   |    |
| I | 5  | ✓ |    | 7  |   | ✓  |   |    |
| Y | 6  |   |    | 6  |   |    |   |    |
| E | 7  |   |    | 5  | ✓ | ✓  |   |    |
| I | 8  |   |    | 4  | ✓ | ✓  |   |    |
| N | 9  |   |    | 3  | ✓ | ✓  |   |    |
| S | 10 | ✓ |    | 2  | ✓ |    |   |    |
| K | 11 | ✓ |    | 1  |   |    |   |    |

R G D V I Y E I N S K

dbValid true DIVTGLGGVTVGK PHOS(2) 2. 689. -0.682908 5.29276 100. ? 2136.  
 S\_Acido\_new%gi|68568609|gb|AAY81538.1| DIVTGLGGVTVGK%::::PHOS::::PHOS::::%sample\_3%cmpd\_823

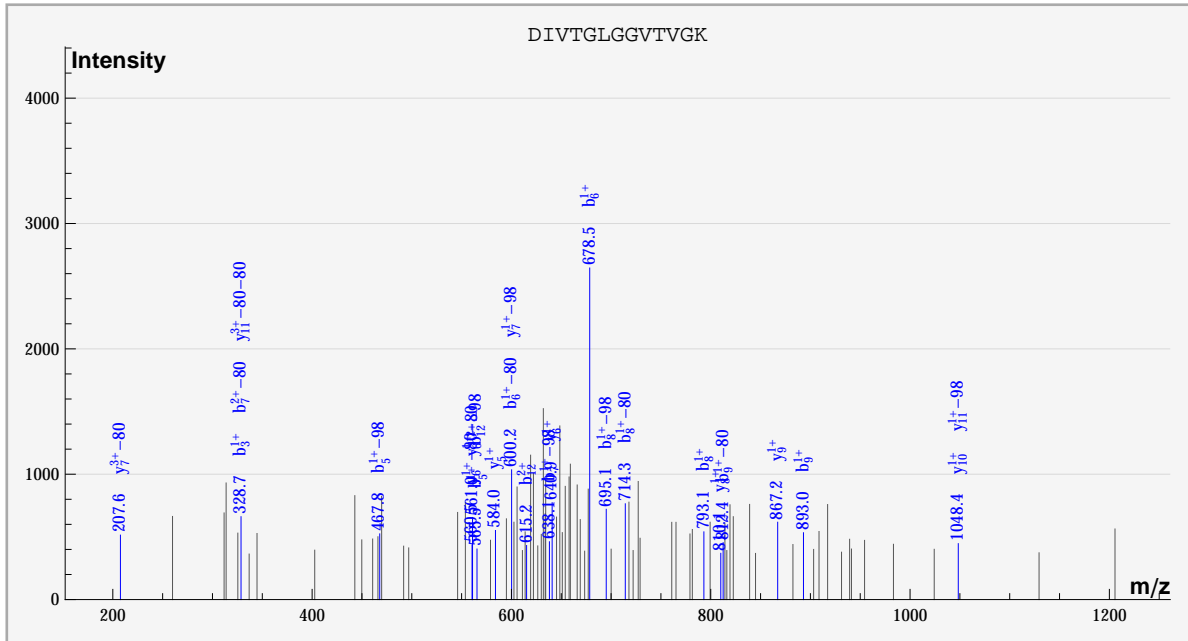

|   | #  | b | b* | #  | y | y* | P | P* |
|---|----|---|----|----|---|----|---|----|
| D | 1  |   |    |    |   |    |   |    |
| I | 2  |   |    | 12 |   |    |   |    |
| V | 3  | ✓ |    | 11 |   | ✓  |   |    |
| T | 4  |   |    | 10 | ✓ |    |   |    |
| G | 5  | ✓ | ✓  | 9  | ✓ |    |   |    |
| L | 6  | ✓ | ✓  | 8  | ✓ |    |   |    |
| G | 7  |   | ✓  | 7  |   | ✓  |   |    |
| G | 8  | ✓ | ✓  | 6  | ✓ | ✓  |   |    |
| V | 9  | ✓ | ✓  | 5  | ✓ |    |   |    |
| T | 10 |   |    | 4  |   |    |   |    |
| V | 11 |   |    | 3  |   |    |   |    |
| G | 12 | ✓ | ✓  | 2  |   |    |   |    |
| K | 13 |   |    | 1  |   |    |   |    |

D I V T G L G G V T V G K

dbValid true RTWGGVIGISPR PHOS(1) 2. 689. 0.853172 5.3951 100. ? 2712.  
 S\_Acido\_new%gi68568658|gb|AAY81587.1| RTWGGVIGISPR%:::PHOS:::sample\_3%compd\_1353

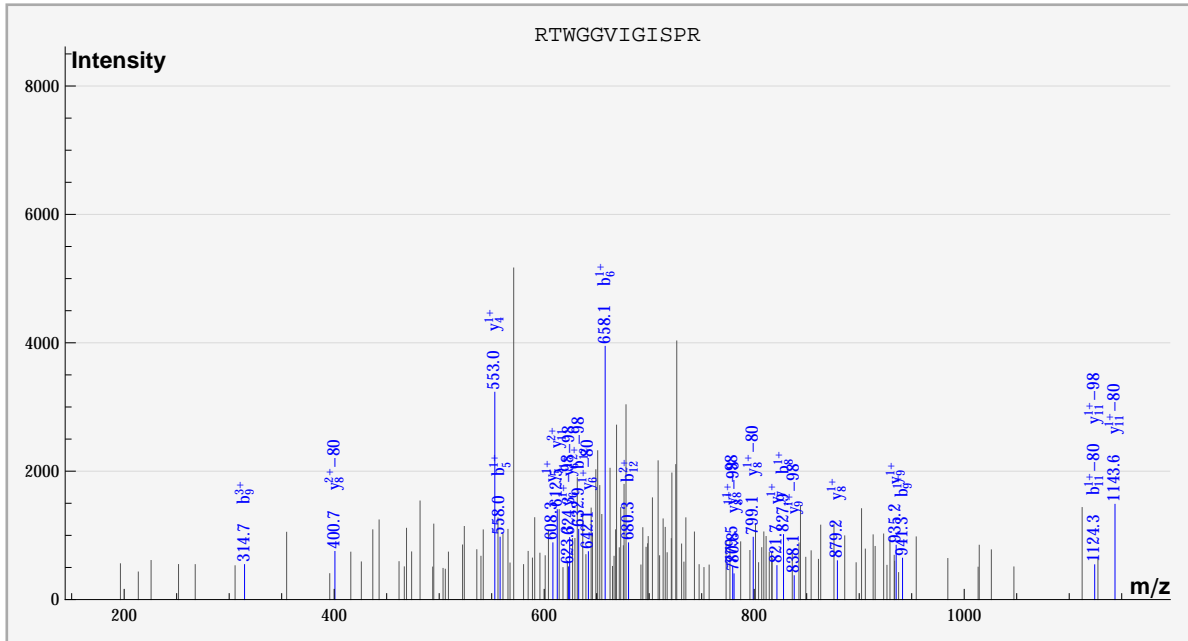

|   | #  | b | b* | #  | y | y* | P | P* |
|---|----|---|----|----|---|----|---|----|
| R | 1  |   |    |    |   |    |   |    |
| T | 2  |   |    | 11 | ✓ | ✓  |   |    |
| W | 3  |   |    | 10 |   |    |   |    |
| G | 4  |   |    | 9  | ✓ | ✓  |   |    |
| G | 5  | ✓ |    | 8  | ✓ | ✓  |   |    |
| V | 6  | ✓ |    | 7  | ✓ |    |   |    |
| I | 7  |   |    | 6  |   | ✓  |   |    |
| G | 8  | ✓ |    | 5  | ✓ |    |   |    |
| I | 9  | ✓ |    | 4  | ✓ |    |   |    |
| S | 10 |   |    | 3  |   |    |   |    |
| P | 11 |   | ✓  | 2  |   |    |   |    |
| R | 12 | ✓ | ✓  | 1  |   |    |   |    |

R T W G G V I G I S P R

dbValid true RARSLISNINR PHOS(1) 2. 689. 1.36699 5.46944 100. ? 3174.  
 S\_Acido\_new%gi|68567167|gb|AAY80096.1| RARSLISNINR%:::PHOS:::sample\_3%compd\_1773

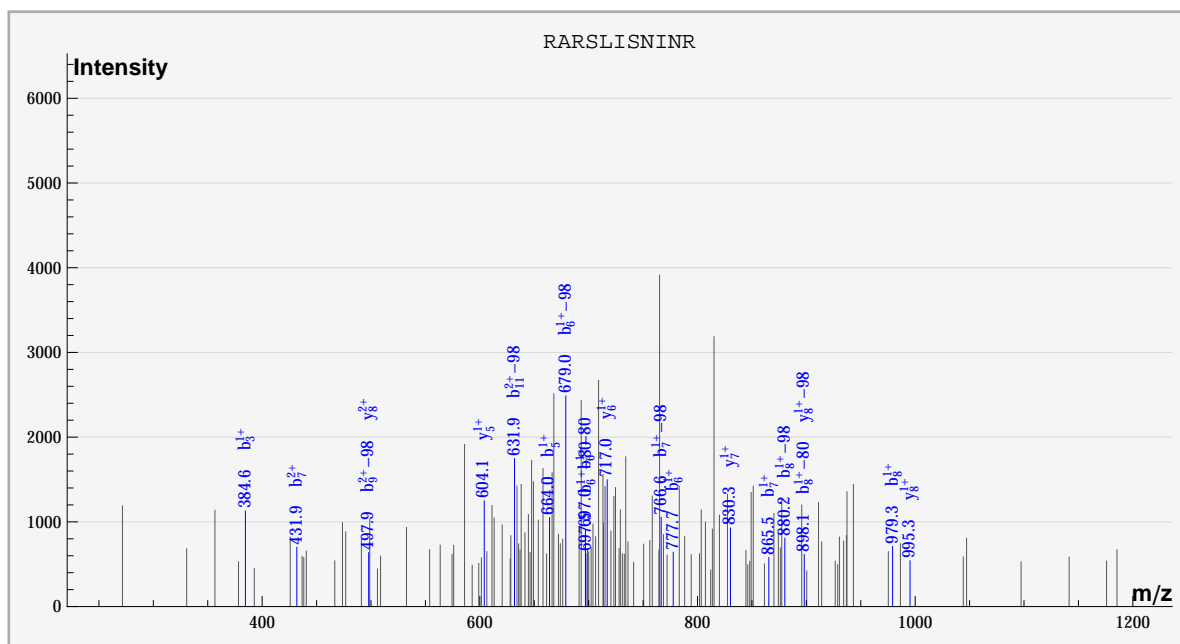

|   | #  | b | b* | #  | y | y* | P | P* |
|---|----|---|----|----|---|----|---|----|
| R | 1  |   |    |    |   |    |   |    |
| A | 2  |   |    | 10 |   |    |   |    |
| R | 3  | ✓ |    | 9  |   |    |   |    |
| S | 4  |   |    | 8  | ✓ | ✓  |   |    |
| L | 5  | ✓ |    | 7  | ✓ |    |   |    |
| I | 6  | ✓ | ✓  | 6  | ✓ |    |   |    |
| S | 7  | ✓ | ✓  | 5  | ✓ |    |   |    |
| N | 8  | ✓ | ✓  | 4  |   |    |   |    |
| I | 9  |   | ✓  | 3  |   |    |   |    |
| N | 10 |   |    | 2  |   |    |   |    |
| R | 11 |   | ✓  | 1  |   |    |   |    |

R A R S L I S N I N R



dbValid true KTGKGFYEYK PHOS(2) 2. 691. -0.214563 5.45997 100. ? 1506.  
 S\_Acido\_new%gi|68567557|gb|AA80486.1| KTGKGFYEYK%::PHOS:::PHOS:::%sample\_0%compd\_243

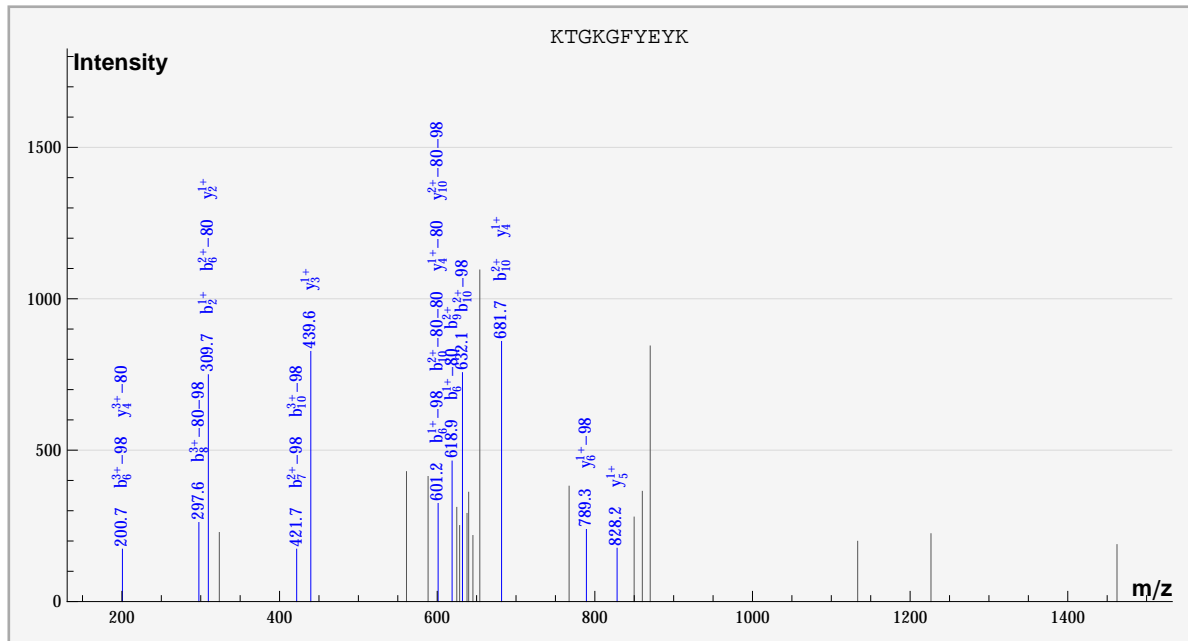

|   | #  | b | b* | # | y | y* | P | P* |
|---|----|---|----|---|---|----|---|----|
| K | 1  |   |    |   |   |    |   | ✓  |
| T | 2  | ✓ |    | 9 |   |    |   |    |
| G | 3  |   |    | 8 |   |    |   |    |
| K | 4  |   |    | 7 |   |    |   |    |
| G | 5  |   |    | 6 |   | ✓  |   |    |
| F | 6  |   | ✓  | 5 | ✓ |    |   |    |
| Y | 7  |   | ✓  | 4 | ✓ | ✓  |   |    |
| E | 8  |   | ✓  | 3 | ✓ |    |   |    |
| Y | 9  | ✓ |    | 2 | ✓ |    |   |    |
| K | 10 | ✓ | ✓  | 1 |   |    |   |    |

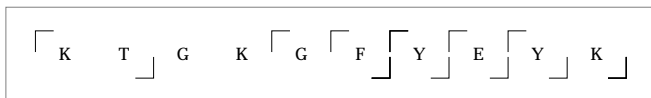

dbValid true SQVFEGKSPNK PHOS(2) 2. 691. -0.216573 5.05932 100. ? 1938.  
 S\_Acido\_new%gi|68567066|gb|AAY79995.1| SQVFEGKSPNK%:PHOS:::PHOS:::%sample\_2%cmpd\_600

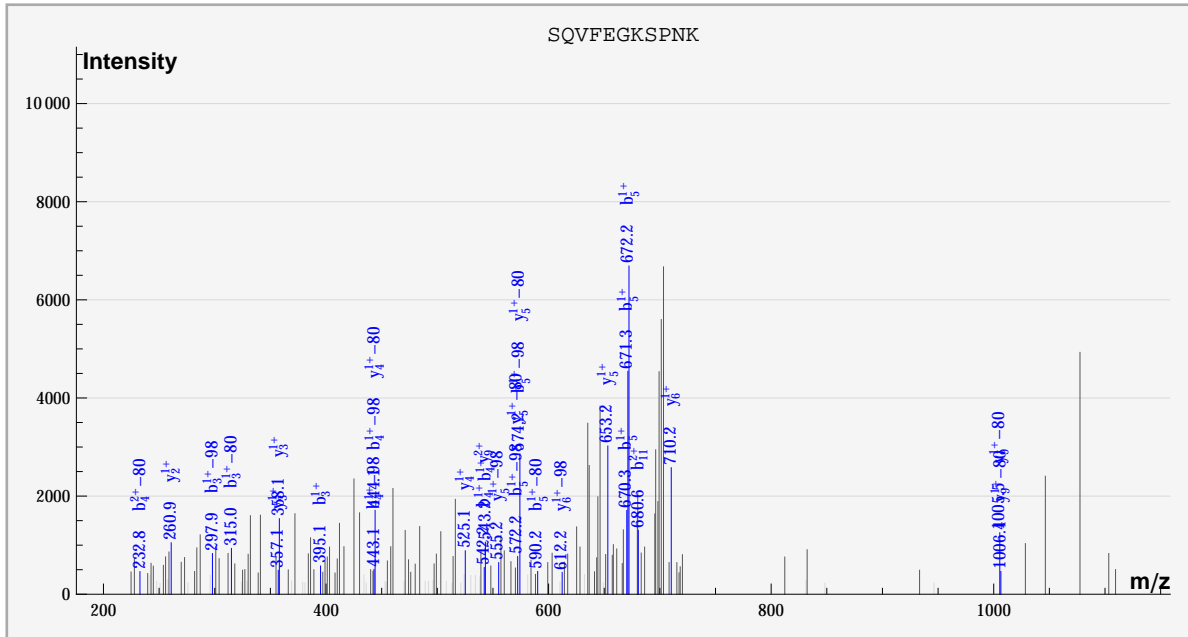

|   | #  | b | b* | #  | y | y* | P | P* |
|---|----|---|----|----|---|----|---|----|
| S | 1  |   |    |    |   |    |   |    |
| Q | 2  |   |    | 10 |   |    |   |    |
| V | 3  | ✓ | ✓  | 9  | ✓ | ✓  |   |    |
| F | 4  | ✓ | ✓  | 8  |   |    |   |    |
| E | 5  | ✓ | ✓  | 7  |   |    |   |    |
| G | 6  |   |    | 6  | ✓ | ✓  |   |    |
| K | 7  |   |    | 5  | ✓ | ✓  |   |    |
| S | 8  |   |    | 4  | ✓ | ✓  |   |    |
| P | 9  |   |    | 3  | ✓ |    |   |    |
| N | 10 |   |    | 2  | ✓ |    |   |    |
| K | 11 | ✓ |    | 1  |   |    |   |    |

S Q V F E G K S P N K

dbValid true SQVFEGKSPNK PHOS(2) 2. 691. -0.216573 5.24735 100. ? 2010.  
 S\_Acido\_new%gi|68567066|gb|AA79995.1| SQVFEGKSPNK%:PHOS:::PHOS:::%sample\_2%compd\_662

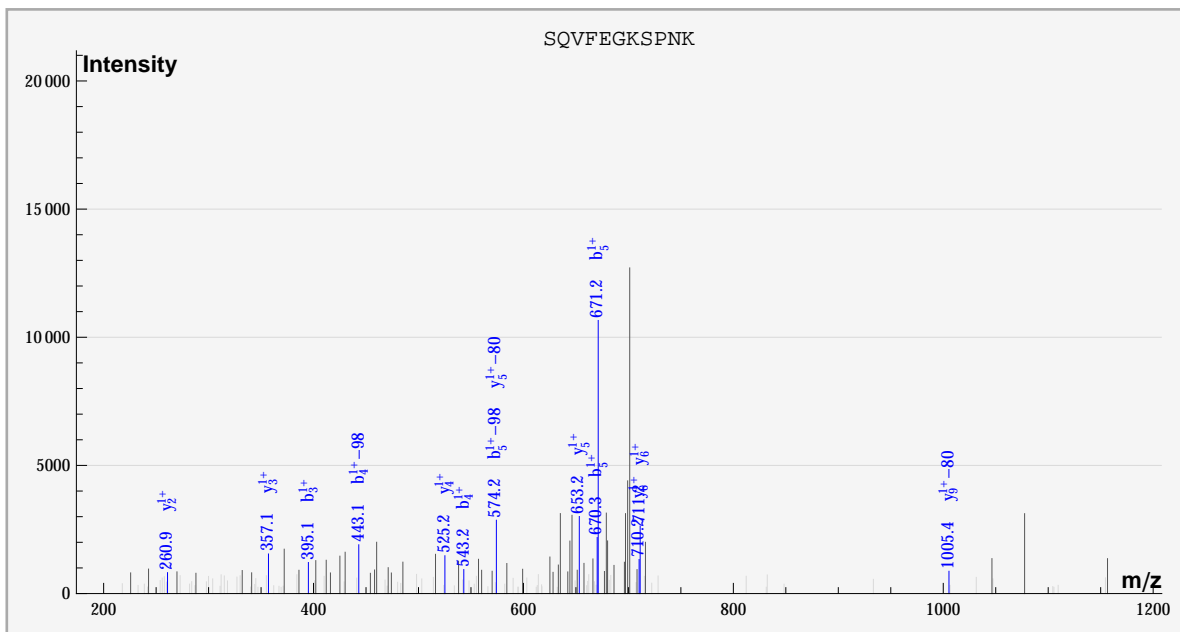

|   | #  | b | b* | #  | y | y* | P | P* |
|---|----|---|----|----|---|----|---|----|
| S | 1  |   |    |    |   |    |   |    |
| Q | 2  |   |    | 10 |   |    |   |    |
| V | 3  | ✓ |    | 9  |   | ✓  |   |    |
| F | 4  | ✓ | ✓  | 8  |   |    |   |    |
| E | 5  | ✓ | ✓  | 7  |   |    |   |    |
| G | 6  |   |    | 6  | ✓ |    |   |    |
| K | 7  |   |    | 5  | ✓ | ✓  |   |    |
| S | 8  |   |    | 4  | ✓ |    |   |    |
| P | 9  |   |    | 3  | ✓ |    |   |    |
| N | 10 |   |    | 2  | ✓ |    |   |    |
| K | 11 |   |    | 1  |   |    |   |    |

S Q V F E G K S P N K

dbValid true YFTFSITTK PHOS(2) 2. 691. -0.201983 4.9999 100. ? 4392.  
 S\_Acido\_new%gi|68567815|gb|AAY80744.1| YFTFSITTK%::::PHOS:::PHOS::%sample\_0%cmpd\_2872

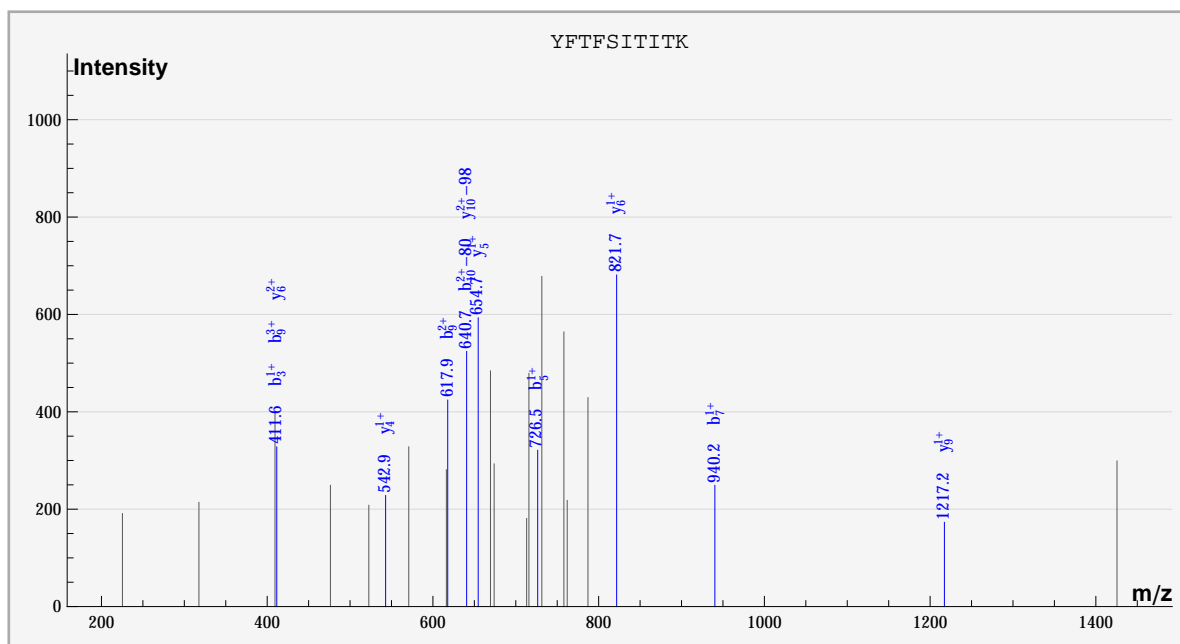

|   | #  | b | b* | # | y | y* | P | P* |
|---|----|---|----|---|---|----|---|----|
| Y | 1  |   |    |   |   |    |   | ✓  |
| F | 2  |   |    | 9 | ✓ |    |   |    |
| T | 3  | ✓ |    | 8 |   |    |   |    |
| F | 4  |   |    | 7 |   |    |   |    |
| S | 5  | ✓ |    | 6 | ✓ |    |   |    |
| I | 6  |   |    | 5 | ✓ |    |   |    |
| T | 7  | ✓ |    | 4 | ✓ |    |   |    |
| I | 8  |   |    | 3 |   |    |   |    |
| T | 9  | ✓ |    | 2 |   |    |   |    |
| K | 10 |   | ✓  | 1 |   |    |   |    |

Y F T F S I T I T K

dbValid true KTGKGFYEYK PHOS(2) 2. 692. -1.21456 5.1436 100. ? 1638.  
 S\_Acido\_new%gi|68567557|gb|AAy80486.1| KTGKGFYEYK%::PHOS:::PHOS::%sample\_0%cmpd\_364

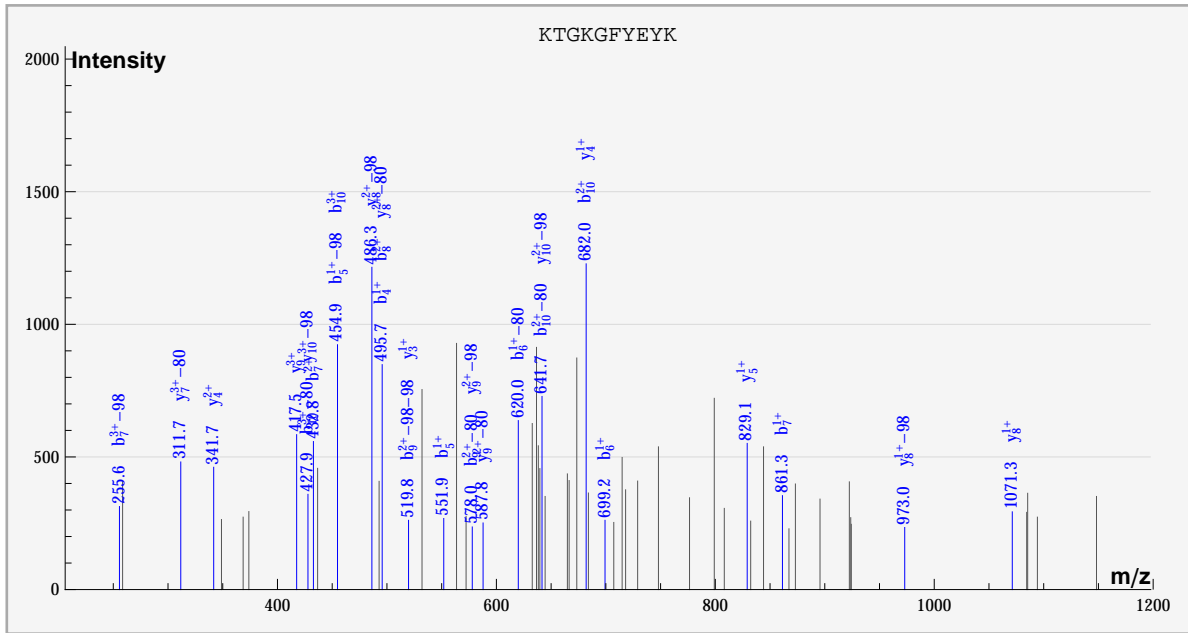

|   | #  | b | b* | # | y | y* | P | P* |
|---|----|---|----|---|---|----|---|----|
| K | 1  |   |    |   |   |    |   | ✓  |
| T | 2  |   |    | 9 | ✓ | ✓  |   |    |
| G | 3  |   |    | 8 | ✓ | ✓  |   |    |
| K | 4  | ✓ |    | 7 |   | ✓  |   |    |
| G | 5  | ✓ | ✓  | 6 |   |    |   |    |
| F | 6  | ✓ | ✓  | 5 | ✓ |    |   |    |
| Y | 7  | ✓ | ✓  | 4 | ✓ |    |   |    |
| E | 8  | ✓ |    | 3 | ✓ |    |   |    |
| Y | 9  |   | ✓  | 2 |   |    |   |    |
| K | 10 | ✓ | ✓  | 1 |   |    |   |    |

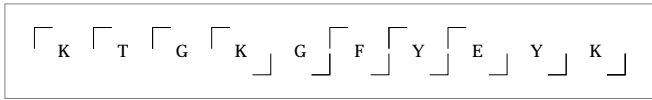

dbValid true YLTLPYNTR PHOS(3) 2. 692. -1.24451 5.09212 100. ? 2466.

S\_Acido\_new%gi|68567020|gb|AA79949.1| YLTLPYNTR%:PHOS::PHOS:::PHOS::%sample\_0%compd\_1115

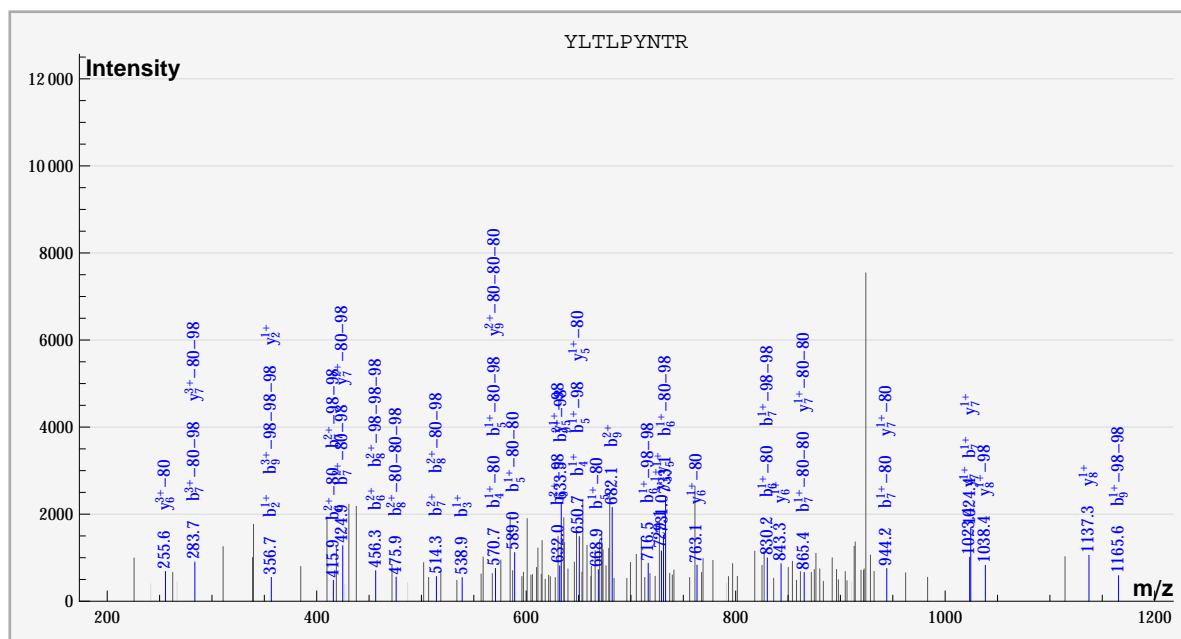

|   | # | b | b* | # | y | y* | P | P* |
|---|---|---|----|---|---|----|---|----|
| Y | 1 |   |    |   |   |    |   | ✓  |
| L | 2 | ✓ |    | 8 | ✓ | ✓  |   |    |
| T | 3 | ✓ |    | 7 | ✓ | ✓  |   |    |
| L | 4 | ✓ | ✓  | 6 | ✓ | ✓  |   |    |
| P | 5 |   | ✓  | 5 | ✓ | ✓  |   |    |
| Y | 6 | ✓ | ✓  | 4 |   |    |   |    |
| N | 7 | ✓ | ✓  | 3 |   |    |   |    |
| T | 8 |   | ✓  | 2 | ✓ |    |   |    |
| R | 9 | ✓ | ✓  | 1 |   |    |   |    |

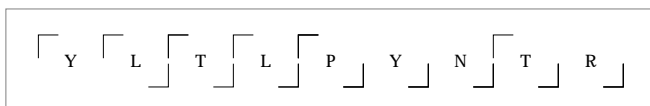

dbValid true SILMINGVDKSK PHOS(1) 2. 692. 0.848912 5.01805 100. ? 2826.  
 S\_Acido\_new%gi|68568273|gb|AAy81202.1| SILMINGVDKSK%:.....PHOS::%sample\_0%compd\_1446

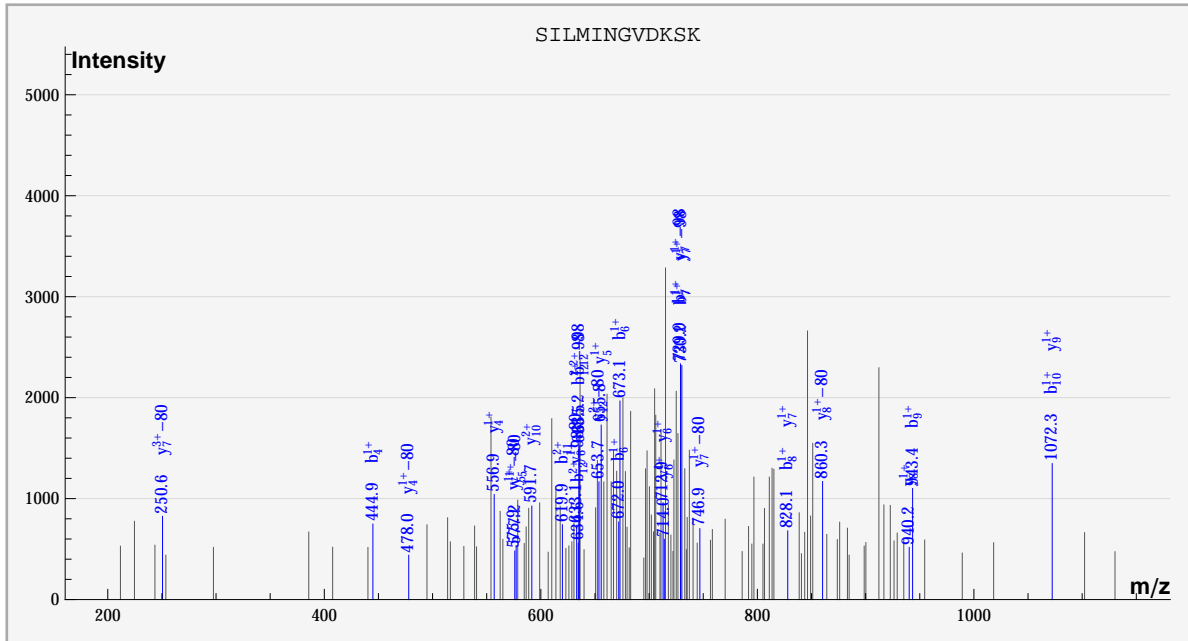

|   | #  | b | b* | #  | y | y* | P | P* |
|---|----|---|----|----|---|----|---|----|
| S | 1  |   |    |    |   |    |   | ✓  |
| I | 2  |   |    | 11 |   |    |   |    |
| L | 3  |   |    | 10 | ✓ |    |   |    |
| M | 4  | ✓ |    | 9  | ✓ |    |   |    |
| I | 5  |   |    | 8  | ✓ | ✓  |   |    |
| N | 6  | ✓ |    | 7  | ✓ | ✓  |   |    |
| G | 7  | ✓ |    | 6  | ✓ | ✓  |   |    |
| V | 8  | ✓ |    | 5  | ✓ | ✓  |   |    |
| D | 9  | ✓ |    | 4  | ✓ | ✓  |   |    |
| K | 10 | ✓ |    | 3  |   |    |   |    |
| S | 11 | ✓ |    | 2  |   |    |   |    |
| K | 12 |   | ✓  | 1  |   |    |   |    |

S I L M I N G V D K S K

dbValid true YRNYVLR PHOS(3) 2. 693. 0.755822 5.00827 100. ? 1578.

S\_Acido\_new%gi|68567852|gb|AAy80781.1| YRNYVLR%:PHOS::PHOS::%sample\_0%compd\_309

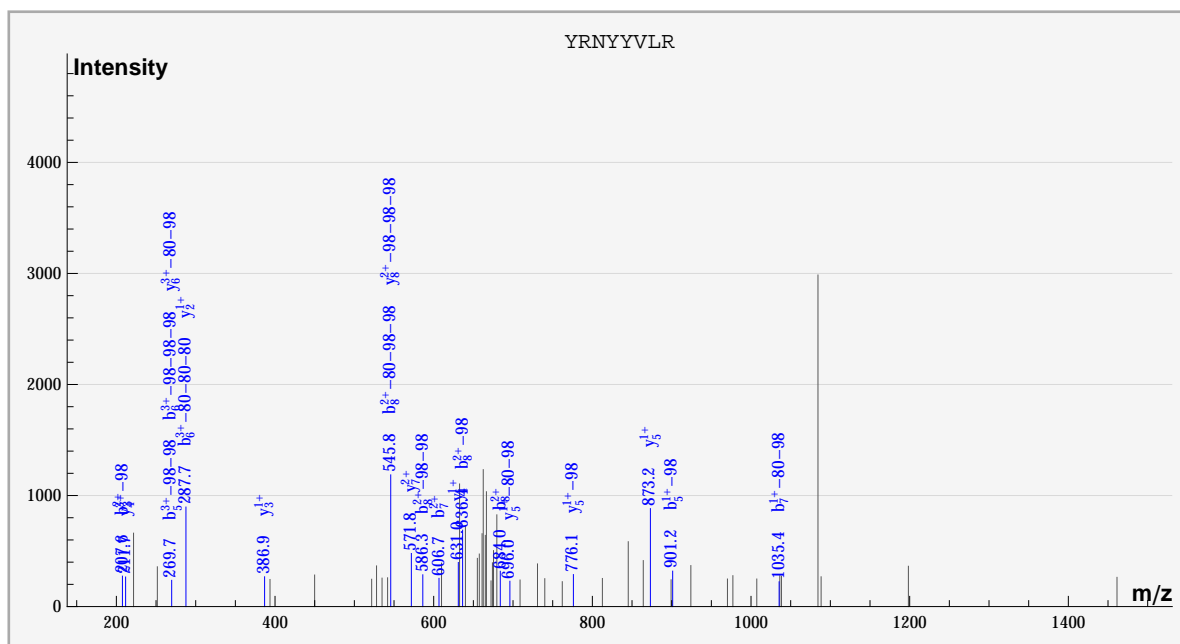

|   | # | b | b* | # | y | y* | P | P* |
|---|---|---|----|---|---|----|---|----|
| Y | 1 |   |    |   |   |    |   | ✓  |
| R | 2 |   |    | 7 | ✓ |    |   |    |
| N | 3 | ✓ |    | 6 |   | ✓  |   |    |
| Y | 4 |   |    | 5 | ✓ | ✓  |   |    |
| Y | 5 | ✓ |    | 4 | ✓ |    |   |    |
| V | 6 | ✓ |    | 3 | ✓ |    |   |    |
| L | 7 | ✓ | ✓  | 2 | ✓ |    |   |    |
| R | 8 | ✓ | ✓  | 1 |   |    |   |    |

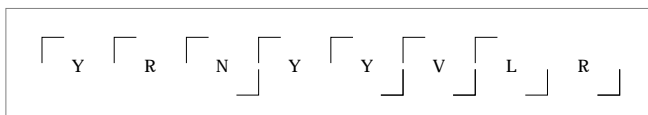



dbValid true YRNYVLR PHOS(3) 2. 693. 0.755822 4.935 100. ? 1590.

S\_Acido\_new%gi|68567852|gb|AA80781.1| YRNYVLR%:PHOS::PHOS:PHOS:::%sample\_0%compd\_321

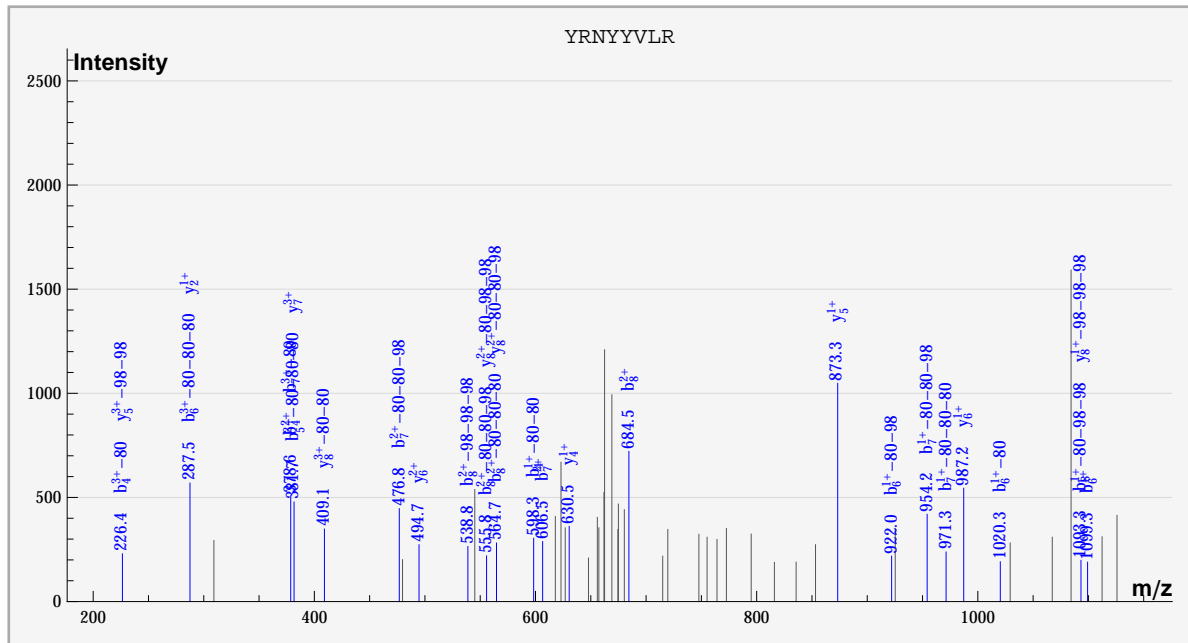

|   | # | b | b* | # | y | y* | P | P* |
|---|---|---|----|---|---|----|---|----|
| Y | 1 |   |    |   |   |    |   | ✓  |
| R | 2 |   |    | 7 | ✓ |    |   |    |
| N | 3 |   |    | 6 | ✓ |    |   |    |
| Y | 4 | ✓ | ✓  | 5 | ✓ | ✓  |   |    |
| Y | 5 |   | ✓  | 4 | ✓ |    |   |    |
| V | 6 | ✓ | ✓  | 3 |   |    |   |    |
| L | 7 | ✓ | ✓  | 2 | ✓ |    |   |    |
| R | 8 | ✓ | ✓  | 1 |   |    |   |    |

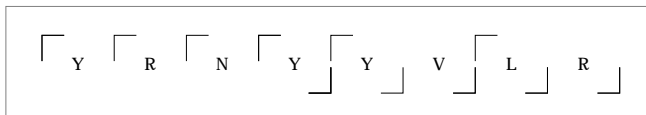

dbValid true GPLATR PHOS(1) 1. 693. 1.32834 5.36315 100. ? 2742.

S\_Acido\_new%gi|68567124|gb|AAY80053.1| GPLATR%:::::PHOS::%sample\_0%compd\_1370

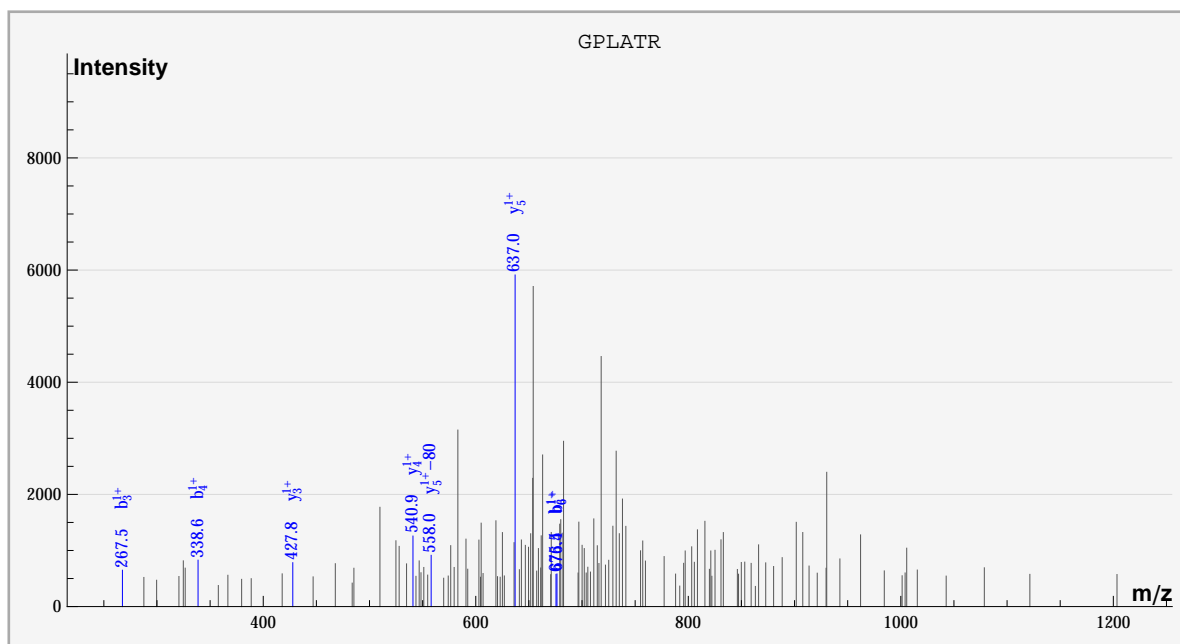

|   | # | b | b* | # | y | y* | P | P* |
|---|---|---|----|---|---|----|---|----|
| G | 1 |   |    |   |   |    |   |    |
| P | 2 |   |    | 5 | ✓ | ✓  |   |    |
| L | 3 | ✓ |    | 4 | ✓ |    |   |    |
| A | 4 | ✓ |    | 3 | ✓ |    |   |    |
| T | 5 |   |    | 2 |   |    |   |    |
| R | 6 | ✓ |    | 1 |   |    |   |    |

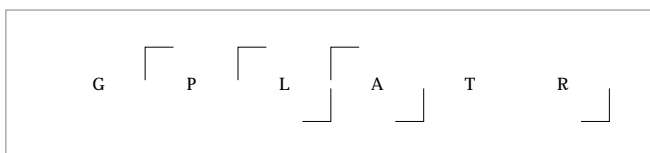

dbValid true REGDEFVVKTK PHOS(1) 2. 694. 0.334477 5.11619 100. ? 2172.  
 S\_Acido\_new%gi|68567364|gb|AAy80293.1| REGDEFVVKTK%:::PHOS::%sample\_0%cmpd\_851

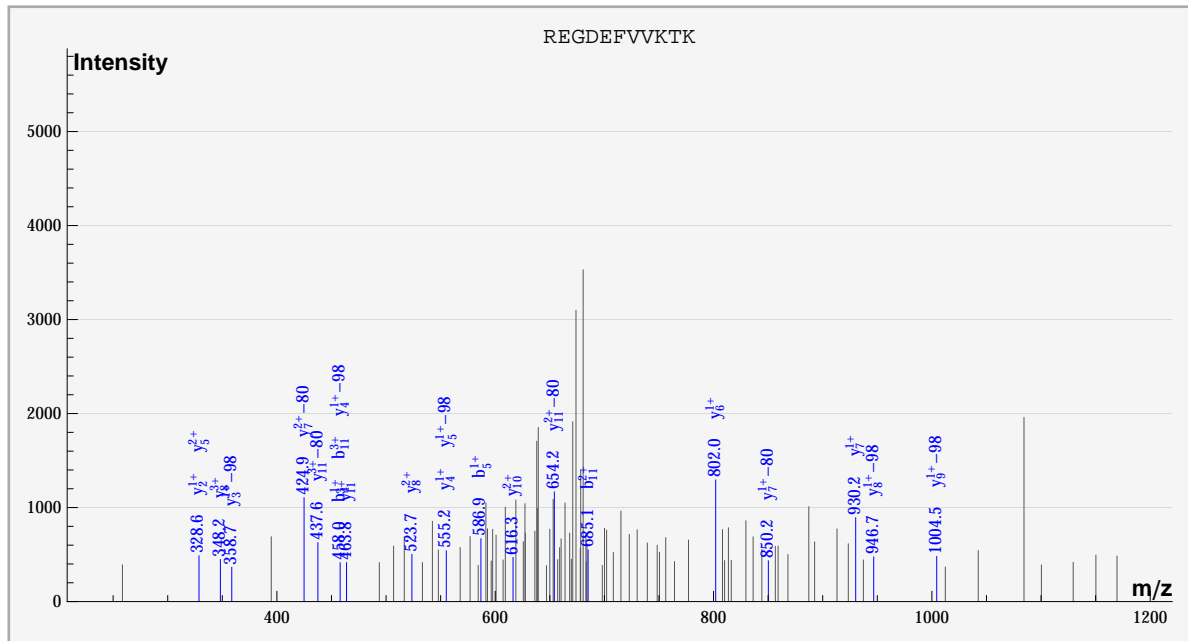

|   | #  | b | b* | #  | y | y* | P | P* |
|---|----|---|----|----|---|----|---|----|
| R | 1  |   |    |    |   |    | ✓ | ✓  |
| E | 2  |   |    | 10 | ✓ |    |   |    |
| G | 3  |   |    | 9  |   | ✓  |   |    |
| D | 4  | ✓ |    | 8  | ✓ | ✓  |   |    |
| E | 5  | ✓ |    | 7  | ✓ | ✓  |   |    |
| F | 6  |   |    | 6  | ✓ |    |   |    |
| V | 7  |   |    | 5  | ✓ | ✓  |   |    |
| V | 8  |   |    | 4  | ✓ | ✓  |   |    |
| K | 9  |   |    | 3  |   | ✓  |   |    |
| T | 10 |   |    | 2  | ✓ |    |   |    |
| K | 11 | ✓ |    | 1  |   |    |   |    |

REGDEFVVKTK

dbValid true VETYSGMRRR PHOS(1) 2. 695. 1.31611 5.13822 100. ? 2526.  
 S\_Acido\_new%gil68567435|gb|AAY80364.1| VETYSGMRRR%:::PHOS:::sample\_0%compd\_1099

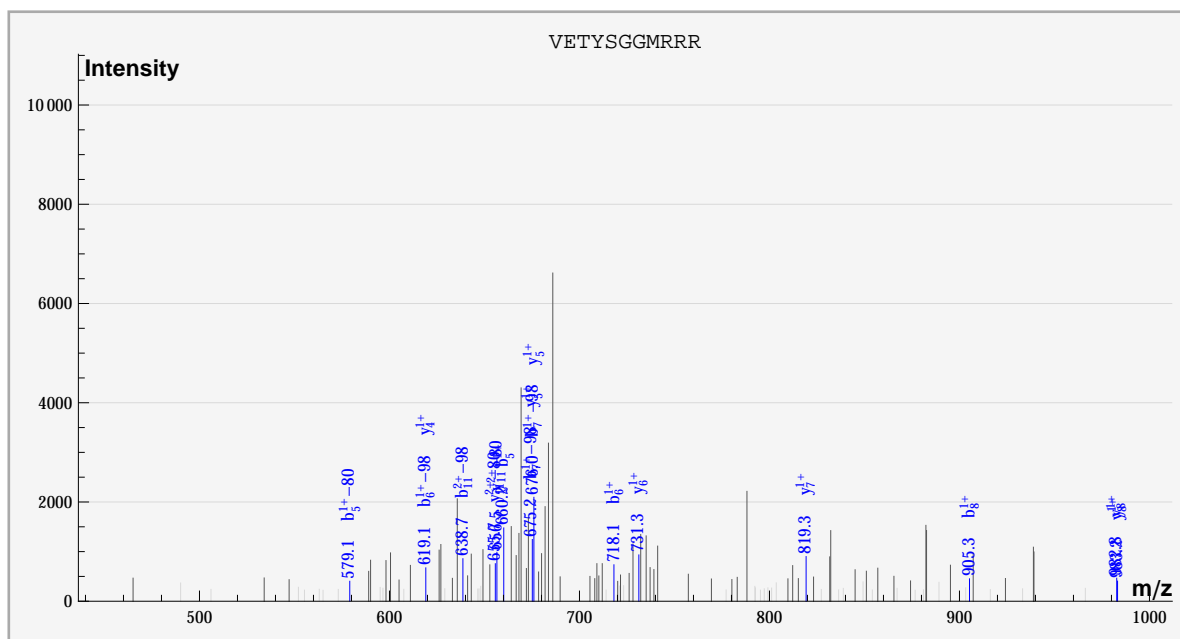

|   | #  | b | b* | #  | y | y* | P | P* |
|---|----|---|----|----|---|----|---|----|
| V | 1  |   |    |    |   |    |   | ✓  |
| E | 2  |   |    | 10 |   |    |   |    |
| T | 3  |   |    | 9  |   |    |   |    |
| Y | 4  |   |    | 8  | ✓ |    |   |    |
| S | 5  | ✓ | ✓  | 7  | ✓ |    |   |    |
| G | 6  | ✓ | ✓  | 6  | ✓ |    |   |    |
| G | 7  |   | ✓  | 5  | ✓ |    |   |    |
| M | 8  | ✓ |    | 4  | ✓ |    |   |    |
| R | 9  |   |    | 3  |   |    |   |    |
| R | 10 |   |    | 2  |   |    |   |    |
| R | 11 |   | ✓  | 1  |   |    |   |    |

V E T Y S G G M R R R

dbValid true YTNTYVTRK PHOS(3) 2. 695. -1.74943 5.03666 100. ? 3792.

S\_Acido\_new%gi|68566706|gb|AAY79635.1| YTNTYVTRK%:PHOS:PHOS::PHOS:::sample\_2%compd\_2190

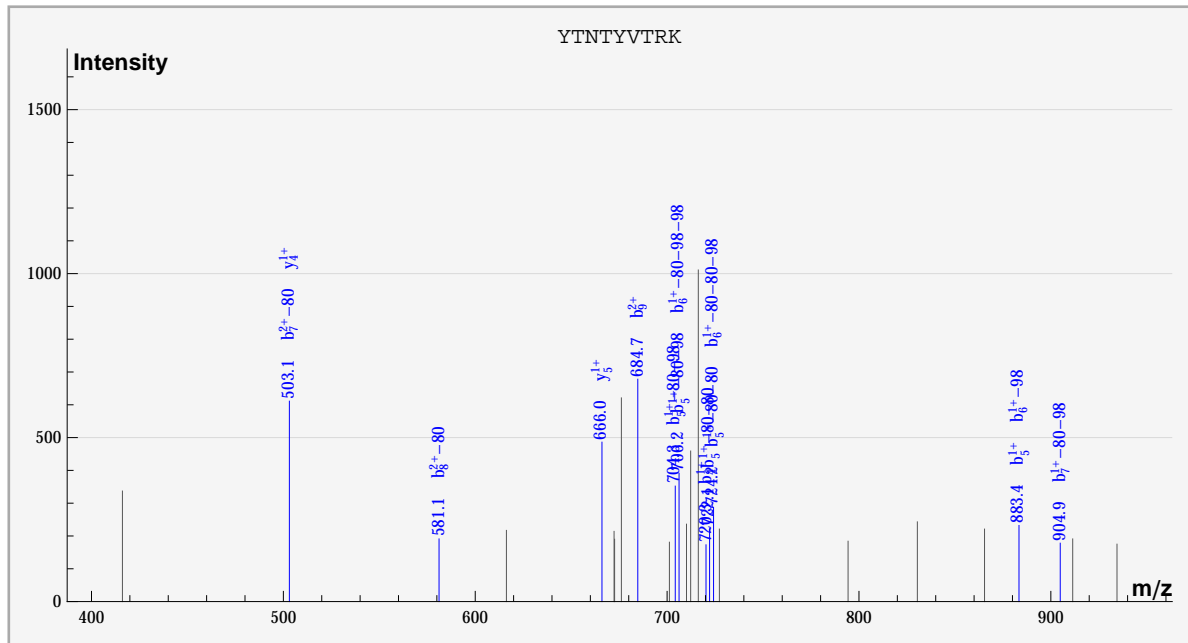

|   | # | b | b* | # | y | y* | P | P* |
|---|---|---|----|---|---|----|---|----|
| Y | 1 |   |    |   |   |    |   |    |
| T | 2 |   |    | 8 |   |    |   |    |
| N | 3 |   |    | 7 |   |    |   |    |
| T | 4 | ✓ |    | 6 |   |    |   |    |
| Y | 5 | ✓ | ✓  | 5 | ✓ |    |   |    |
| V | 6 |   | ✓  | 4 | ✓ |    |   |    |
| T | 7 |   | ✓  | 3 |   |    |   |    |
| R | 8 |   | ✓  | 2 |   |    |   |    |
| K | 9 | ✓ |    | 1 |   |    |   |    |

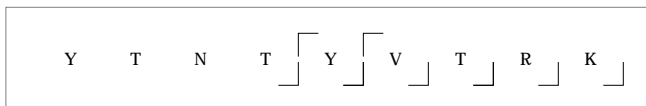

dbValid true DPEKSFELTSR PHOS(1) 2. 696. -1.1917 5.09345 100. ? 2892.  
 S\_Acido\_new%gi|68568518|gb|AA81447.1| DPEKSFELTSR%:::PHOS::%sample\_0%cmpd\_1505

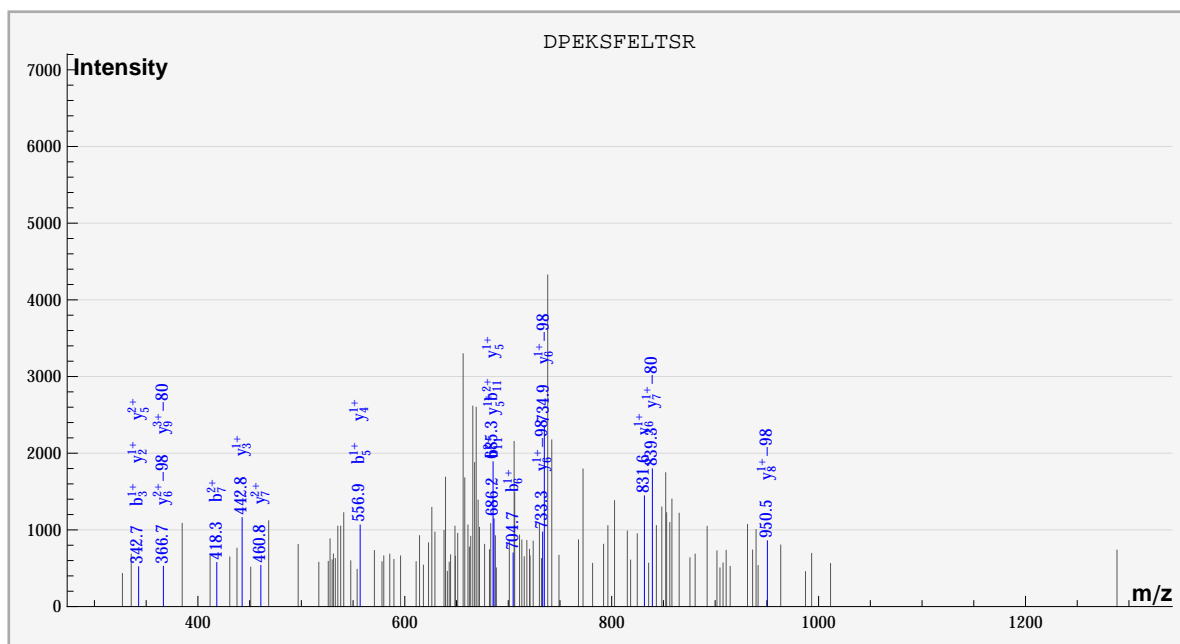

|   | #  | b | b* | #  | y | y* | P | P* |
|---|----|---|----|----|---|----|---|----|
| D | 1  |   |    |    |   |    |   |    |
| P | 2  |   |    | 10 |   |    |   |    |
| E | 3  | ✓ |    | 9  |   | ✓  |   |    |
| K | 4  |   |    | 8  |   | ✓  |   |    |
| S | 5  | ✓ |    | 7  | ✓ | ✓  |   |    |
| F | 6  | ✓ |    | 6  | ✓ | ✓  |   |    |
| E | 7  | ✓ |    | 5  | ✓ |    |   |    |
| L | 8  |   |    | 4  | ✓ |    |   |    |
| T | 9  |   |    | 3  | ✓ |    |   |    |
| S | 10 |   |    | 2  | ✓ |    |   |    |
| R | 11 | ✓ |    | 1  |   |    |   |    |

D P E K S F E L T S R

dbValid true ETIYSGGNWER PHOS(1) 2. 698. -1.71501 5.00699 100. ? 1728.  
 S\_Acido\_new%gi|68566944|gb|AAV79873.1| ETIYSGGNWER%::::PHOS:::::sample\_0%cmpd\_445

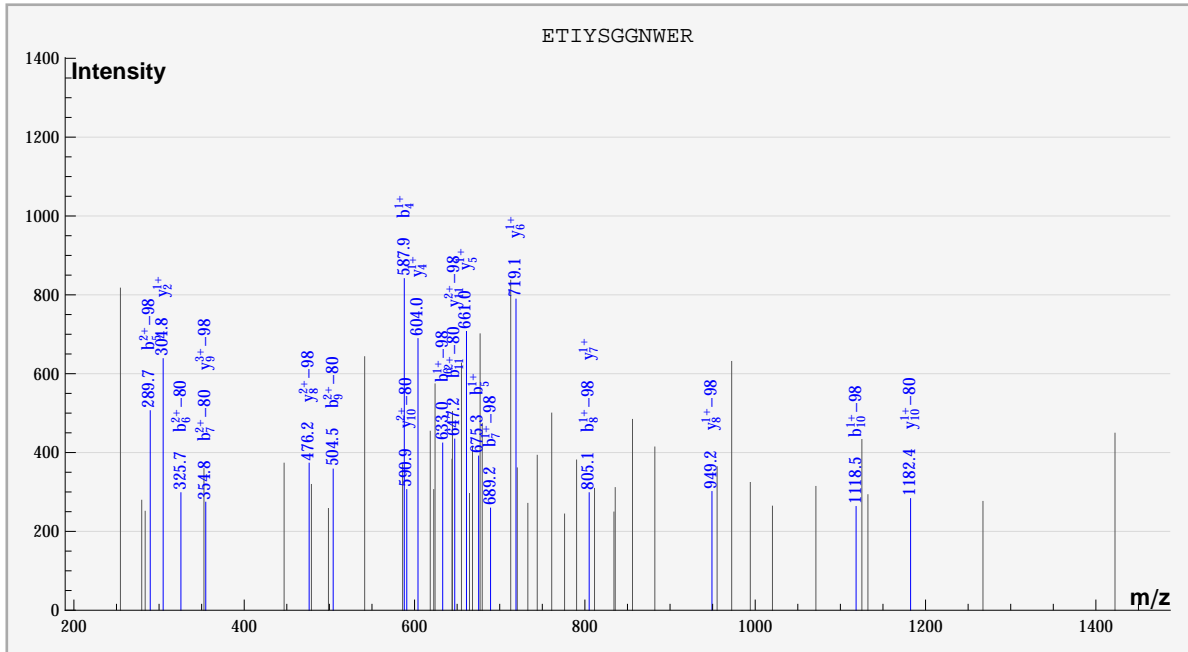

|   | #  | b | b* | #  | y | y* | P | P* |
|---|----|---|----|----|---|----|---|----|
| E | 1  |   |    |    |   |    |   | ✓  |
| T | 2  |   |    | 10 |   |    |   | ✓  |
| I | 3  |   |    | 9  |   |    |   | ✓  |
| Y | 4  | ✓ |    | 8  |   |    |   | ✓  |
| S | 5  | ✓ | ✓  | 7  | ✓ |    |   |    |
| G | 6  |   | ✓  | 6  | ✓ |    |   |    |
| G | 7  |   | ✓  | 5  | ✓ |    |   |    |
| N | 8  |   | ✓  | 4  | ✓ |    |   |    |
| W | 9  |   | ✓  | 3  |   |    |   |    |
| E | 10 |   | ✓  | 2  | ✓ |    |   |    |
| R | 11 |   | ✓  | 1  |   |    |   |    |

ETIYSGGNWER

dbValid true EIIYFLLYK PHOS(1) 2. 698. -0.127823 5.12482 100. ? 2064.  
 S\_Acido\_new%gi|68567730|gb|AAY80659.1| EIIYFLLYK%::::PHOS::::%sample\_0%cmpd\_755

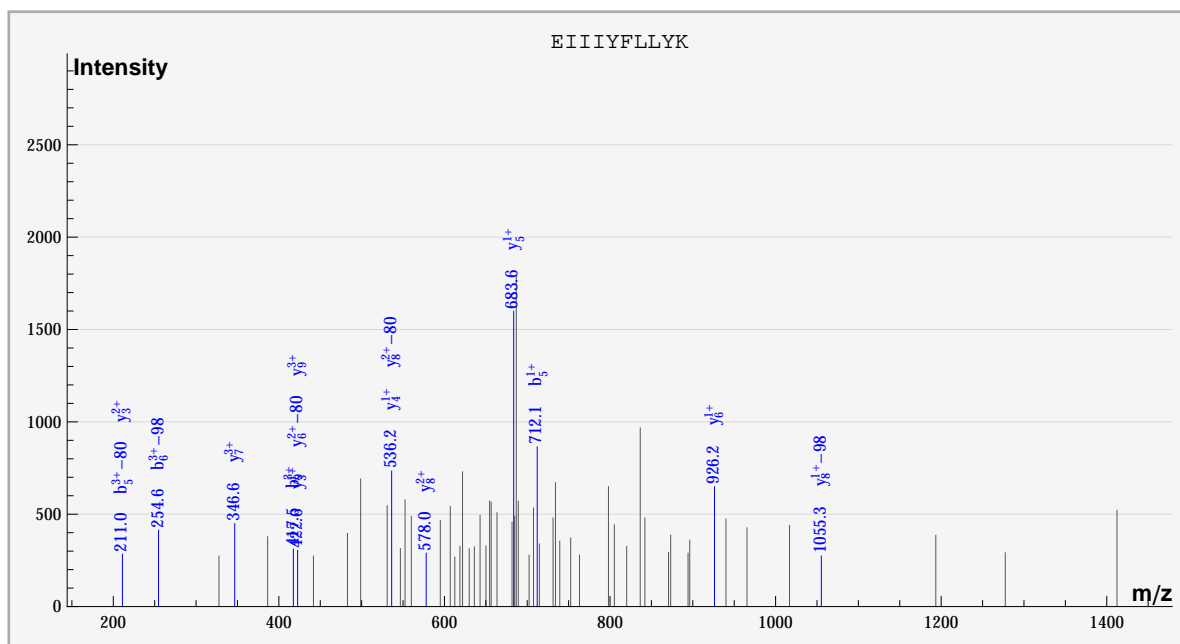

|   | #  | b | b* | # | y | y* | P | P* |
|---|----|---|----|---|---|----|---|----|
| E | 1  |   |    |   |   |    |   |    |
| I | 2  |   |    | 9 | ✓ |    |   |    |
| I | 3  |   |    | 8 | ✓ | ✓  |   |    |
| I | 4  |   |    | 7 | ✓ |    |   |    |
| Y | 5  | ✓ | ✓  | 6 | ✓ | ✓  |   |    |
| F | 6  |   | ✓  | 5 | ✓ |    |   |    |
| L | 7  |   |    | 4 | ✓ |    |   |    |
| L | 8  |   |    | 3 | ✓ |    |   |    |
| Y | 9  | ✓ |    | 2 |   |    |   |    |
| K | 10 |   |    | 1 |   |    |   |    |

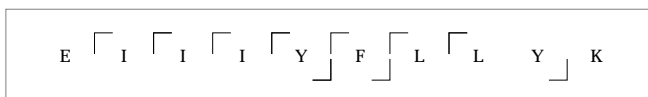



dbValid true TDTGYKNSLR PHOS(3) 2. 699. -1.25689 5.12899 100. ? 1434.

S\_Acido\_new%gi|68567901|gb|AA80830.1| TDTGYKNSLR%:PHOS:::PHOS:::PHOS:::sample\_2%cmpd\_168

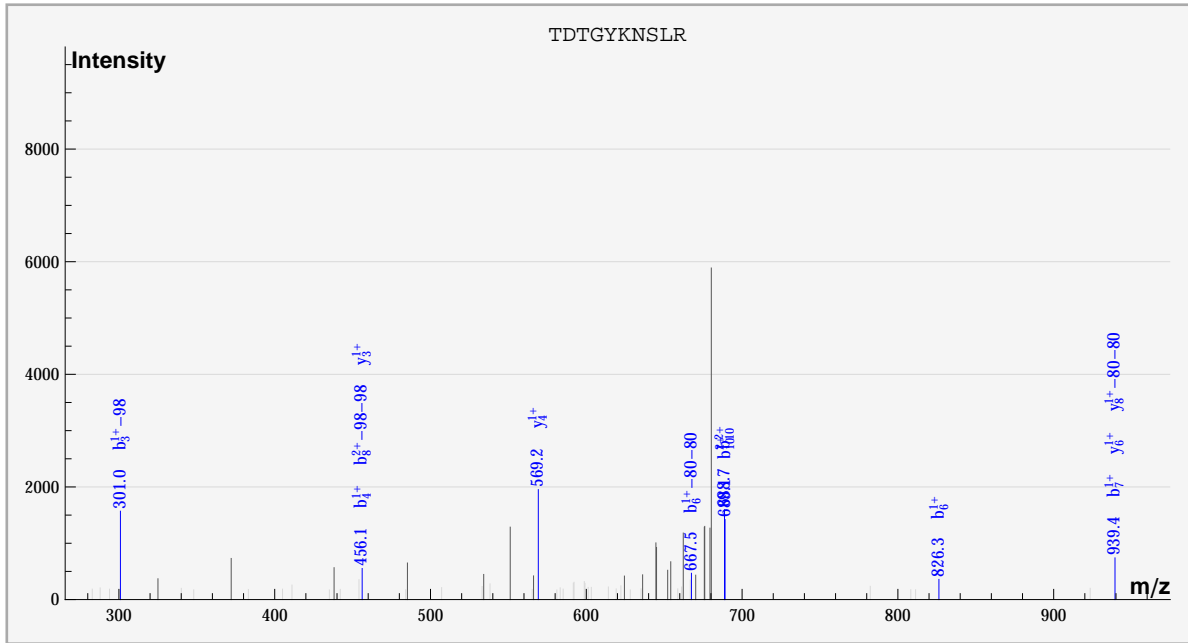

|   | #  | b | b* | # | y | y* | P | P* |
|---|----|---|----|---|---|----|---|----|
| T | 1  |   |    |   |   |    |   |    |
| D | 2  |   |    | 9 |   |    |   |    |
| T | 3  |   | ✓  | 8 |   | ✓  |   |    |
| G | 4  | ✓ |    | 7 |   |    |   |    |
| Y | 5  |   |    | 6 |   | ✓  |   |    |
| K | 6  | ✓ | ✓  | 5 |   |    |   |    |
| N | 7  | ✓ |    | 4 |   | ✓  |   |    |
| S | 8  |   | ✓  | 3 |   | ✓  |   |    |
| L | 9  |   |    | 2 |   |    |   |    |
| R | 10 | ✓ |    | 1 |   |    |   |    |

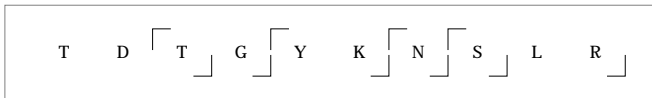

dbValid true TDTGYKNSLR PHOS(3) 2. 699. -1.25689 5.31195 100. ? 1446.

S\_Acido\_new%gi|68567901|gb|AAY80830.1| TDTGYKNSLR%:PHOS:::PHOS:::PHOS:::sample\_2%cmpd\_177

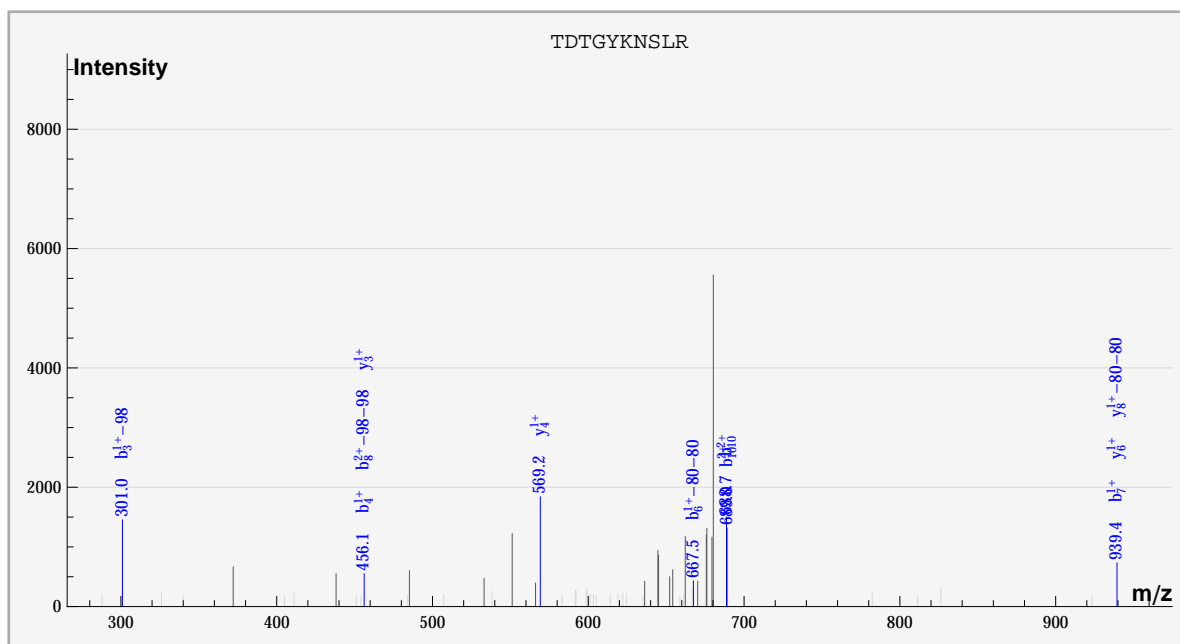

|   | #  | b | b* | # | y | y* | P | P* |
|---|----|---|----|---|---|----|---|----|
| T | 1  |   |    |   |   |    |   |    |
| D | 2  |   |    | 9 |   |    |   |    |
| T | 3  |   | ✓  | 8 |   | ✓  |   |    |
| G | 4  | ✓ |    | 7 |   |    |   |    |
| Y | 5  |   |    | 6 |   | ✓  |   |    |
| K | 6  |   | ✓  | 5 |   |    |   |    |
| N | 7  | ✓ |    | 4 |   | ✓  |   |    |
| S | 8  |   | ✓  | 3 |   | ✓  |   |    |
| L | 9  |   |    | 2 |   |    |   |    |
| R | 10 | ✓ |    | 1 |   |    |   |    |

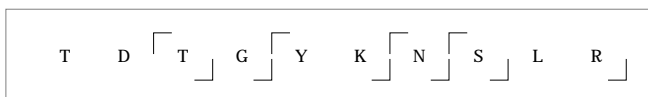

dbValid true QKITEFITQK PHOS(2) 2. 699. -0.680353 5.08027 100. ? 1464.  
 S\_Acido\_new%gi|68567956|gb|AA80885.1| QKITEFITQK%::::PHOS::::PHOS::::%sample\_2%cmpd\_197

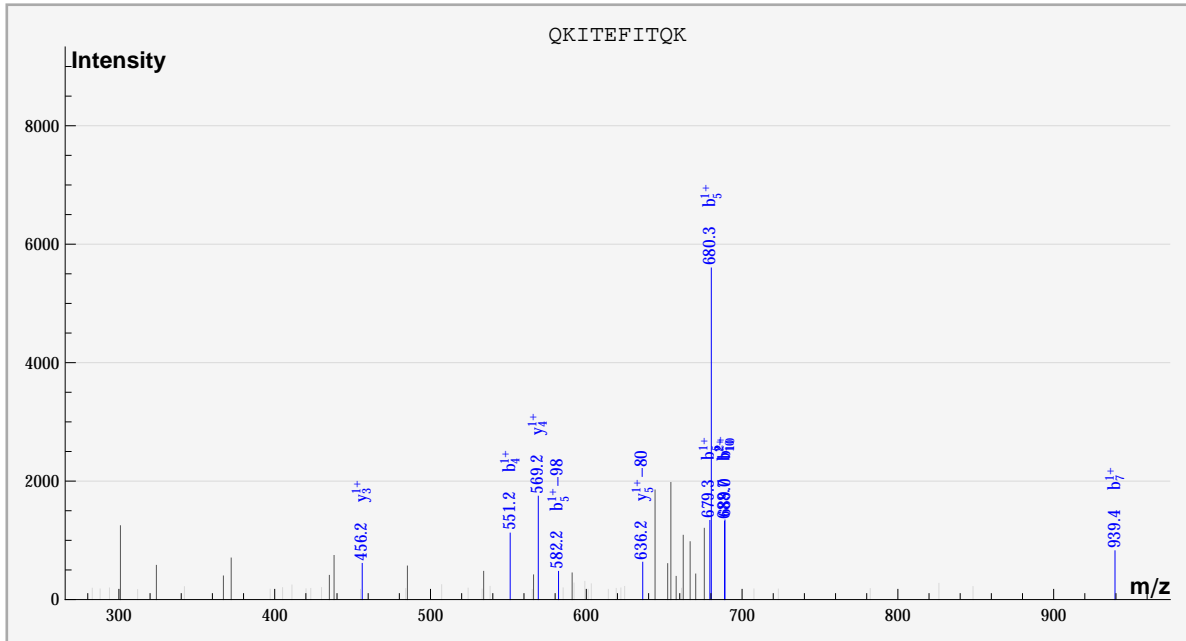

|   | #  | b | b* | # | y | y* | P | P* |
|---|----|---|----|---|---|----|---|----|
| Q | 1  |   |    |   |   |    |   |    |
| K | 2  |   |    | 9 |   |    |   |    |
| I | 3  |   |    | 8 |   |    |   |    |
| T | 4  | ✓ |    | 7 |   |    |   |    |
| E | 5  | ✓ | ✓  | 6 |   |    |   |    |
| F | 6  |   |    | 5 |   | ✓  |   |    |
| I | 7  | ✓ |    | 4 | ✓ |    |   |    |
| T | 8  |   |    | 3 | ✓ |    |   |    |
| Q | 9  |   |    | 2 |   |    |   |    |
| K | 10 | ✓ |    | 1 |   |    |   |    |

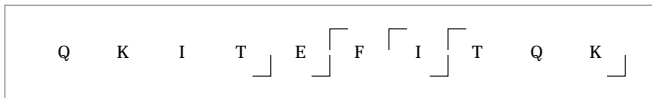

dbValid true ASLQAVSQLYR PHOS(2) 2. 699. -0.692928 5.44124 100. ? 2562.  
 S\_Acido\_new%gi|68566690|gb|AA79619.1| ASLQAVSQLYR%::PHOS:::PHOS::%sample\_0%compd\_1211

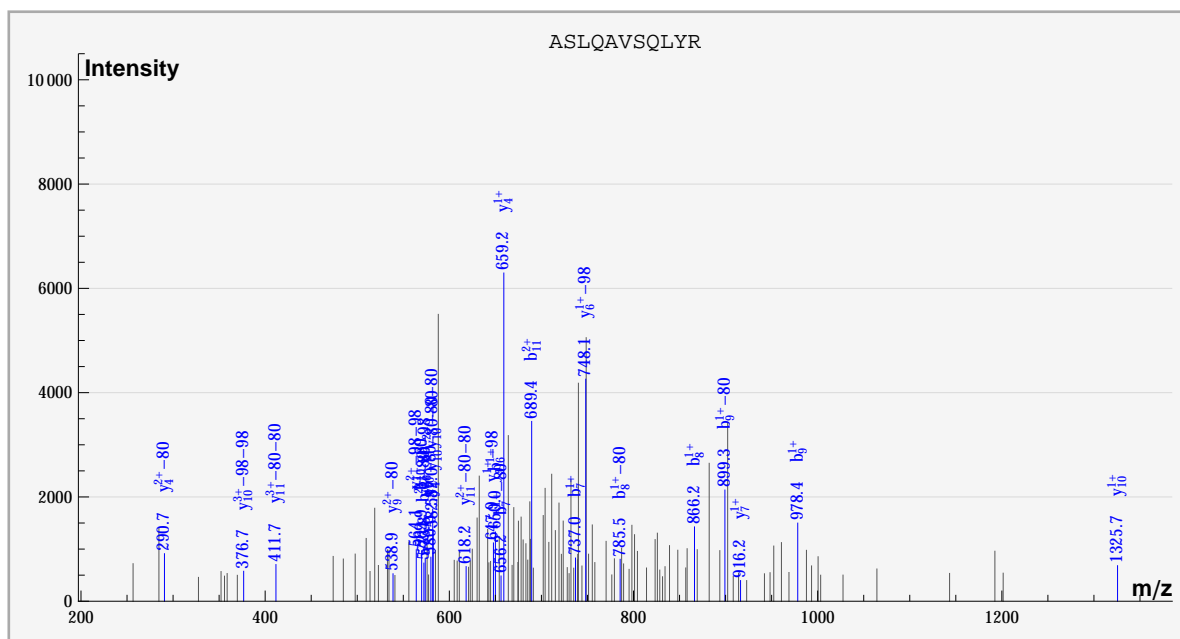

|   | #  | b | b* | #  | y | y* | P | P* |
|---|----|---|----|----|---|----|---|----|
| A | 1  |   |    |    |   |    |   | ✓  |
| S | 2  |   |    | 10 | ✓ | ✓  |   |    |
| L | 3  |   |    | 9  |   | ✓  |   |    |
| Q | 4  |   |    | 8  |   |    |   |    |
| A | 5  |   |    | 7  | ✓ |    |   |    |
| V | 6  | ✓ | ✓  | 6  |   | ✓  |   |    |
| S | 7  | ✓ | ✓  | 5  |   | ✓  |   |    |
| Q | 8  | ✓ | ✓  | 4  | ✓ | ✓  |   |    |
| L | 9  | ✓ | ✓  | 3  |   |    |   |    |
| Y | 10 |   | ✓  | 2  |   |    |   |    |
| R | 11 | ✓ |    | 1  |   |    |   |    |

ASLQAVSQLYR

dbValid true LIGDSL PHOS(1) 1. 699. -1.68324 5.44493 100. ? 2634.  
 S\_Acido\_new%gi|68567921|gb|AAY80850.1| LIGDSL%:::::PHOS::%sample\_0%compd\_1277

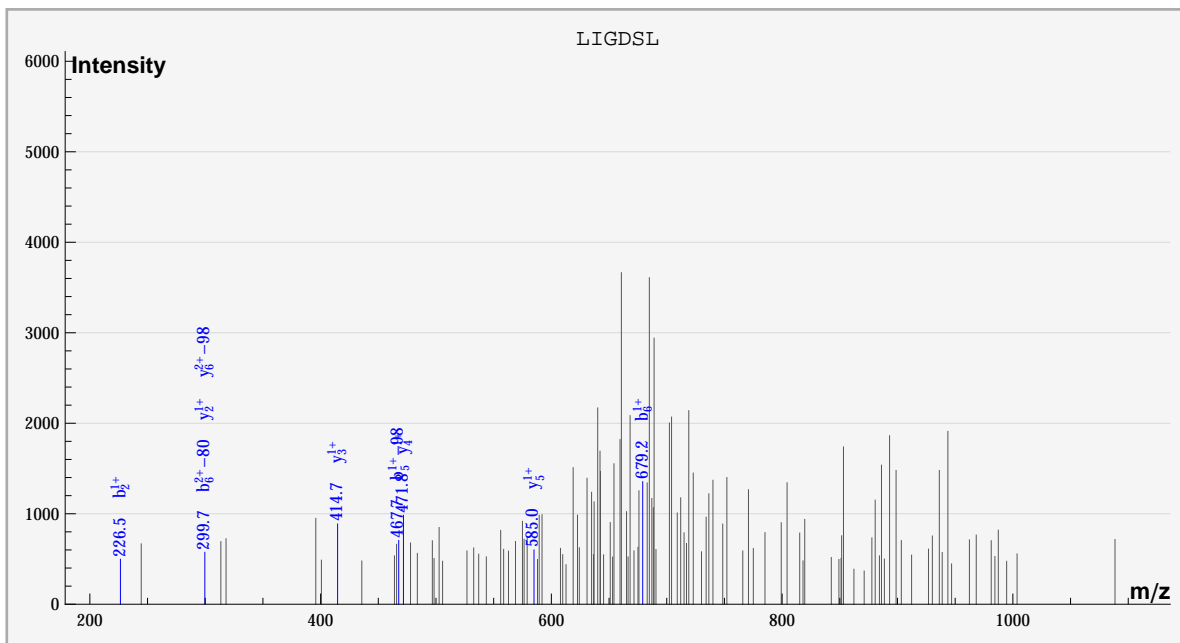

|   | # | b | b* | # | y | y* | P | P* |
|---|---|---|----|---|---|----|---|----|
| L | 1 |   |    |   |   |    |   | ✓  |
| I | 2 | ✓ |    | 5 | ✓ |    |   |    |
| G | 3 |   |    | 4 | ✓ |    |   |    |
| D | 4 |   |    | 3 | ✓ |    |   |    |
| S | 5 |   | ✓  | 2 | ✓ |    |   |    |
| L | 6 | ✓ | ✓  | 1 |   |    |   |    |

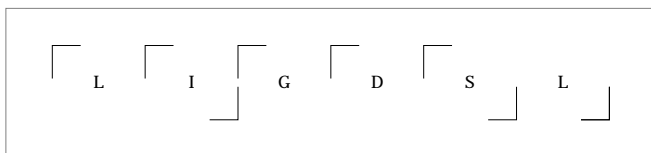

dbValid true RDTLQGISVKK PHOS(2) 2. 701. 1.83599 5.24369 100. ? 3114.

S\_Acido\_new%gi|68567937|gb|AA80866.1| RDTLQGISVKK%:::PHOS:::PHOS:::%sample\_3%compd\_1598

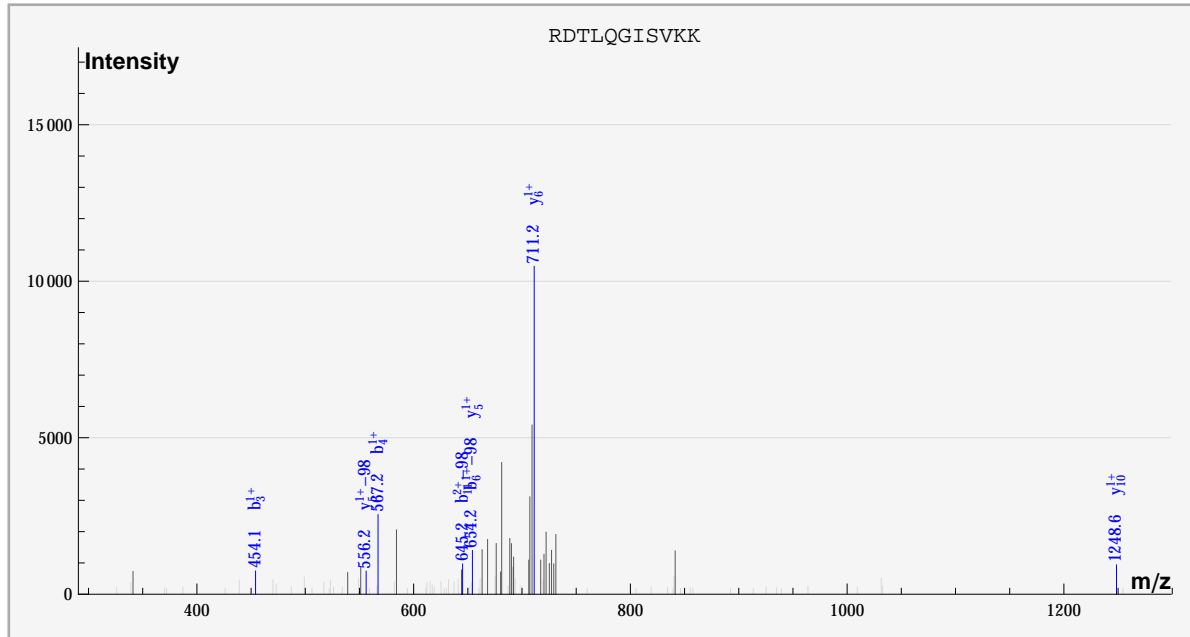

|   | #  | b | b* | #  | y | y* | P | P* |
|---|----|---|----|----|---|----|---|----|
| R | 1  |   |    |    |   |    |   |    |
| D | 2  |   |    | 10 | ✓ |    |   |    |
| T | 3  | ✓ |    | 9  |   |    |   |    |
| L | 4  | ✓ |    | 8  |   |    |   |    |
| Q | 5  |   |    | 7  |   |    |   |    |
| G | 6  |   | ✓  | 6  | ✓ |    |   |    |
| I | 7  |   |    | 5  | ✓ | ✓  |   |    |
| S | 8  |   |    | 4  |   |    |   |    |
| V | 9  |   |    | 3  |   |    |   |    |
| K | 10 |   |    | 2  |   |    |   |    |
| K | 11 |   | ✓  | 1  |   |    |   |    |

R [ D T ] L ] Q [ G ] I S V K K ]

dbValid true VVITADAYYRR PHOS(1) 2. 702. 1.84502 4.98492 100. ? 2154.  
 S\_Acido\_new%gi|68567602|gb|AAV80531.1| VVITADAYYRR%::::PHOS%:::::%sample\_0%compd\_822

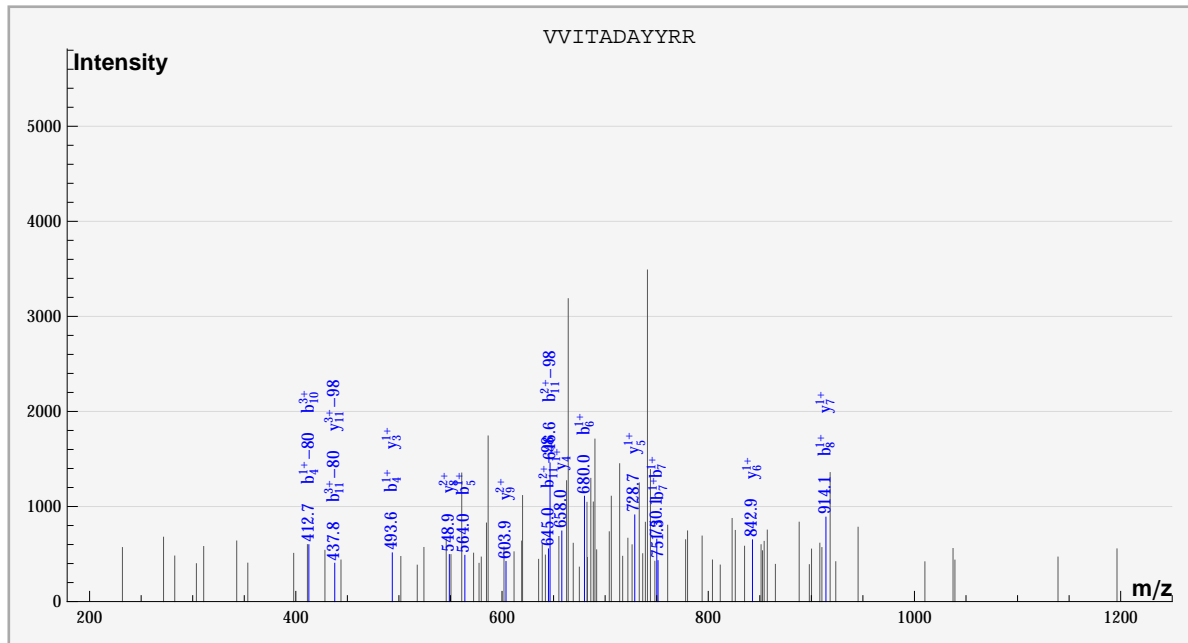

|   | #  | b | b* | #  | y | y* | P | P* |
|---|----|---|----|----|---|----|---|----|
| V | 1  |   |    |    |   |    |   | ✓  |
| V | 2  |   |    | 10 |   |    |   |    |
| I | 3  |   |    | 9  | ✓ |    |   |    |
| T | 4  | ✓ | ✓  | 8  | ✓ |    |   |    |
| A | 5  | ✓ |    | 7  | ✓ |    |   |    |
| D | 6  | ✓ |    | 6  | ✓ |    |   |    |
| A | 7  | ✓ |    | 5  | ✓ |    |   |    |
| Y | 8  | ✓ |    | 4  | ✓ |    |   |    |
| Y | 9  |   |    | 3  | ✓ |    |   |    |
| R | 10 | ✓ |    | 2  |   |    |   |    |
| R | 11 |   | ✓  | 1  |   |    |   |    |

V V I T A D A Y Y R R

dbValid true QLLSMFSSPSK Oxidation\_M(1),PHOS(2) 2. 702. -1.21796 5.61417 100. ? 2166.  
 S\_Acido\_new%gil68566758|gb|AAY79687.1| QLLSMFSSPSK%::::PHOS:Oxidation\_M::::PHOS::%sample\_3%compd\_787

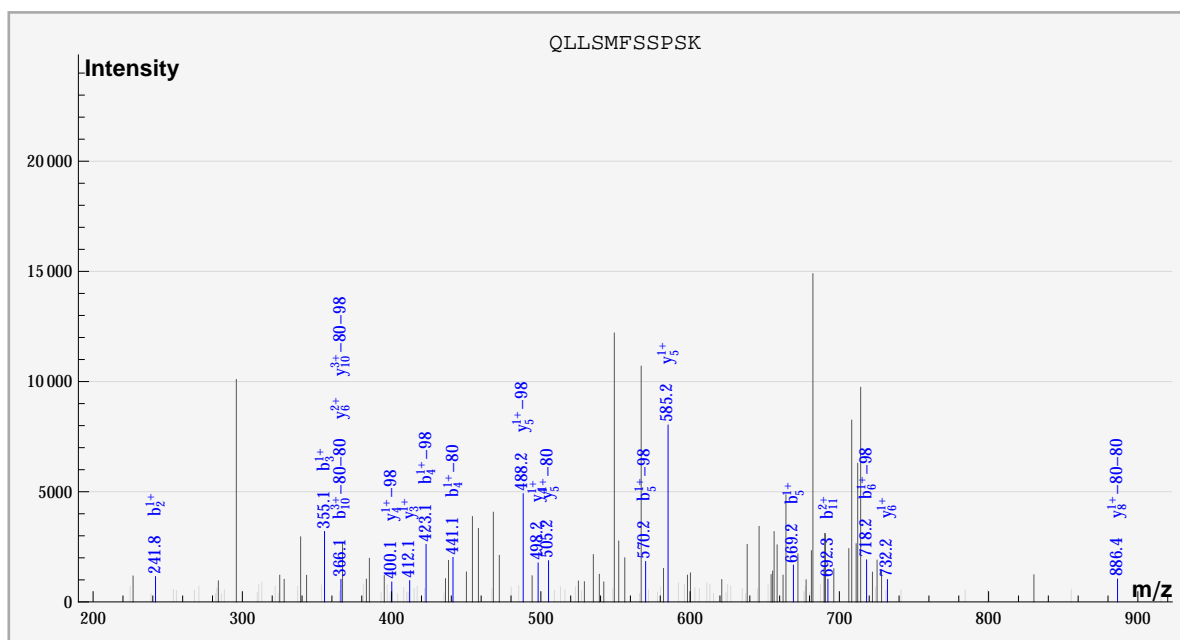

|   | #  | b | b* | #  | y | y* | P | P* |
|---|----|---|----|----|---|----|---|----|
| Q | 1  |   |    |    |   |    |   |    |
| L | 2  | ✓ |    | 10 |   | ✓  |   |    |
| L | 3  | ✓ |    | 9  |   |    |   |    |
| S | 4  |   | ✓  | 8  |   | ✓  |   |    |
| M | 5  | ✓ | ✓  | 7  |   |    |   |    |
| F | 6  |   | ✓  | 6  | ✓ |    |   |    |
| S | 7  |   |    | 5  | ✓ | ✓  |   |    |
| S | 8  |   |    | 4  | ✓ | ✓  |   |    |
| P | 9  |   |    | 3  | ✓ |    |   |    |
| S | 10 |   | ✓  | 2  |   |    |   |    |
| K | 11 | ✓ |    | 1  |   |    |   |    |

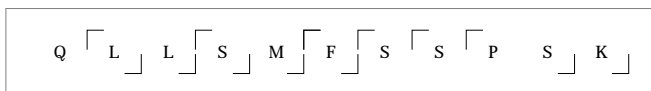



dbValid true NISRIPIISRR PHOS(1) 2. 702. 0.895377 5.39728 100. ? 2760.  
 S\_Acido\_new%gi|68567463|gb|AA80392.1| NISRIPIISRR%:::::PHOS::%sample\_0%compd\_1375

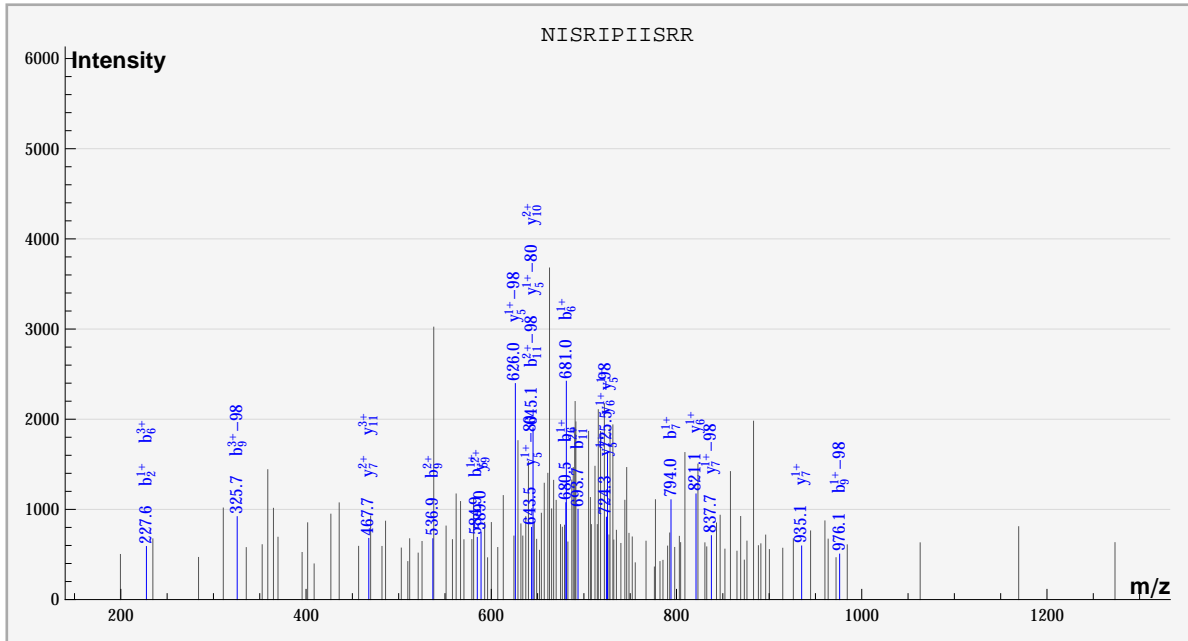

|   | #  | b | b* | #  | y | y* | P | P* |
|---|----|---|----|----|---|----|---|----|
| N | 1  |   |    |    |   |    |   | ✓  |
| I | 2  | ✓ |    | 10 | ✓ |    |   |    |
| S | 3  |   |    | 9  | ✓ |    |   |    |
| R | 4  |   |    | 8  |   |    |   |    |
| I | 5  | ✓ |    | 7  | ✓ | ✓  |   |    |
| P | 6  | ✓ |    | 6  | ✓ | ✓  |   |    |
| I | 7  | ✓ |    | 5  | ✓ | ✓  |   |    |
| I | 8  |   |    | 4  |   |    |   |    |
| S | 9  | ✓ | ✓  | 3  |   |    |   |    |
| R | 10 |   |    | 2  |   |    |   |    |
| R | 11 | ✓ | ✓  | 1  |   |    |   |    |

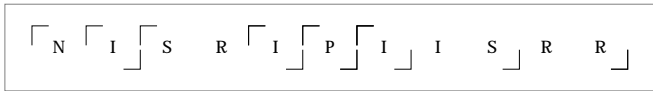

dbValid true YSYEKLERR PHOS(2) 2. 703. -0.708578 5.04869 100. ? 1584.  
 S\_Acido\_new%gi|68567350|gb|AAy80279.1| YSYEKLERR%:PHOS::PHOS:::sample\_0%compd\_307

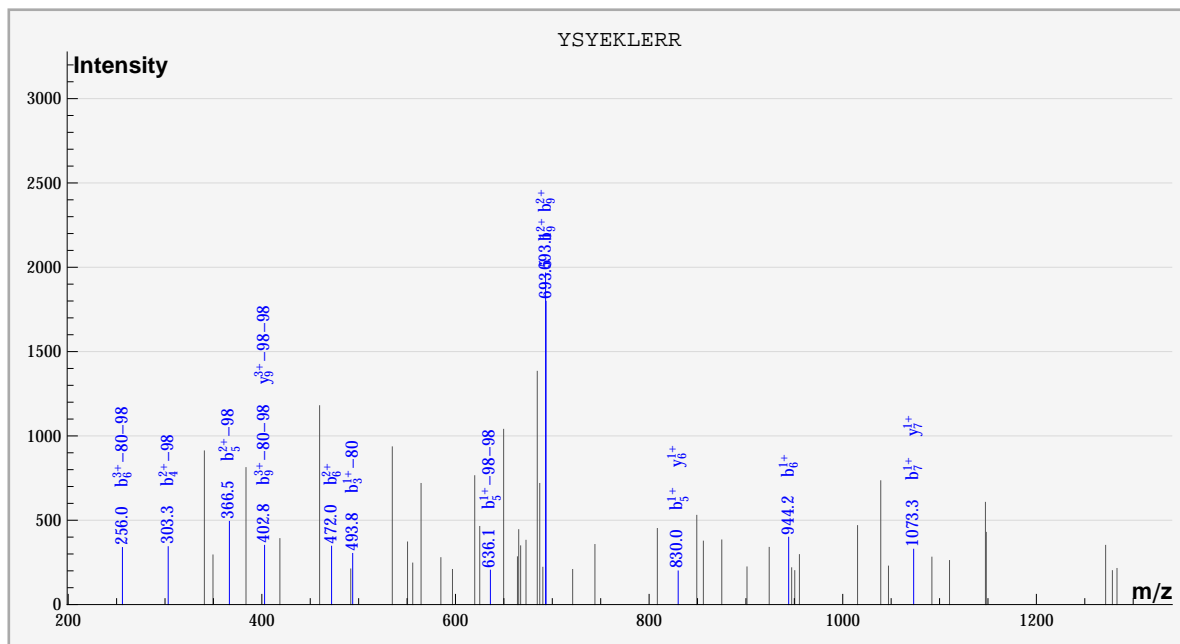

|   | # | b | b* | # | y | y* | P | P* |
|---|---|---|----|---|---|----|---|----|
| Y | 1 |   |    |   |   |    |   | ✓  |
| S | 2 |   |    | 8 |   |    |   |    |
| Y | 3 | ✓ | ✓  | 7 | ✓ |    |   |    |
| E | 4 | ✓ | ✓  | 6 | ✓ |    |   |    |
| K | 5 | ✓ | ✓  | 5 |   |    |   |    |
| L | 6 | ✓ | ✓  | 4 |   |    |   |    |
| E | 7 | ✓ |    | 3 |   |    |   |    |
| R | 8 |   |    | 2 |   |    |   |    |
| R | 9 | ✓ | ✓  | 1 |   |    |   |    |

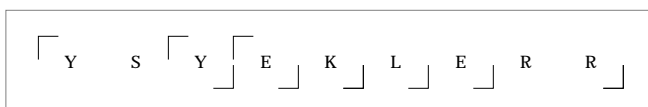

dbValid true EYIELEEKNR PHOS(1) 2. 703. -1.18388 5.75944 100. ? 2838.

S\_Acido\_new%gi|68568192|gb|AA81121.1| EYIELEEKNR::PHOS:::sample\_1%cmpd\_1354

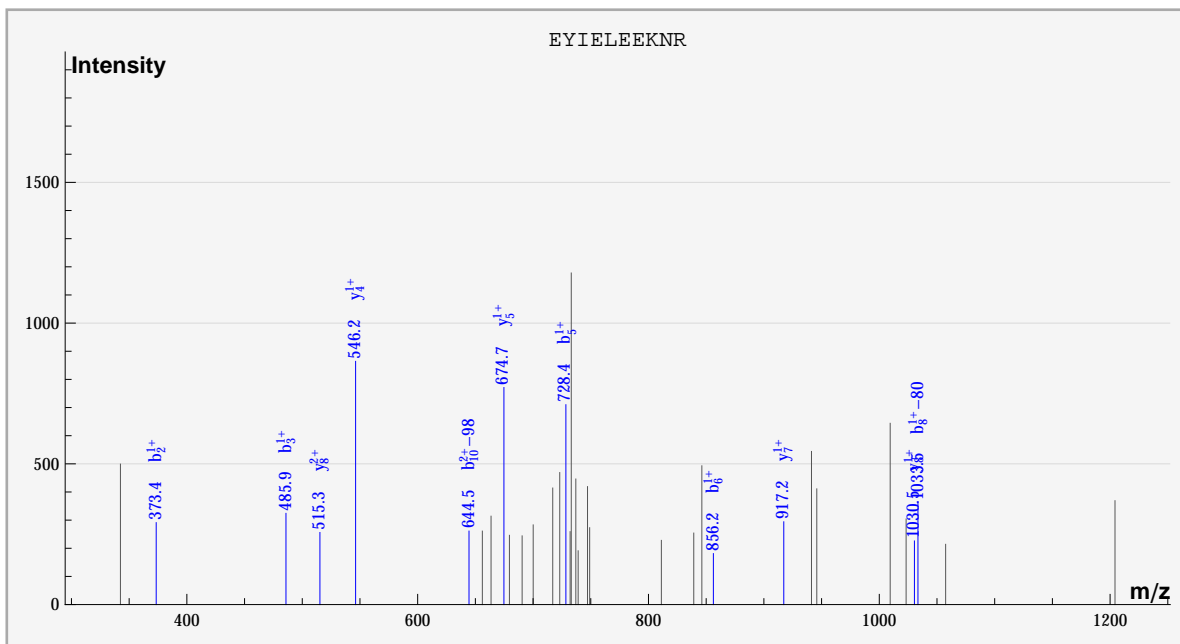

|   | #  | b | b* | # | y | y* | P | P* |
|---|----|---|----|---|---|----|---|----|
| E | 1  |   |    |   |   |    |   |    |
| Y | 2  | ✓ |    | 9 |   |    |   |    |
| I | 3  | ✓ |    | 8 | ✓ |    |   |    |
| E | 4  |   |    | 7 | ✓ |    |   |    |
| L | 5  | ✓ |    | 6 |   |    |   |    |
| E | 6  | ✓ |    | 5 | ✓ |    |   |    |
| E | 7  |   |    | 4 | ✓ |    |   |    |
| K | 8  |   | ✓  | 3 |   |    |   |    |
| N | 9  |   |    | 2 |   |    |   |    |
| R | 10 |   | ✓  | 1 |   |    |   |    |

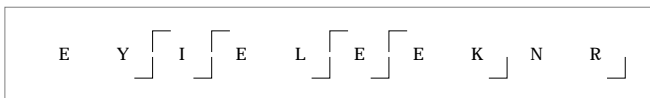

dbValid true VETYSGGMRRR Oxidation\_M(1),PHOS(1) 2. 704. 0.313557 5.01435 100. ? 2604.  
 S\_Acido\_new%gil68567435|gb|AAy80364.1| VETYSGGMRRR%:::PHOS%:::Oxidation\_M%:::%sample\_0%compd\_1233

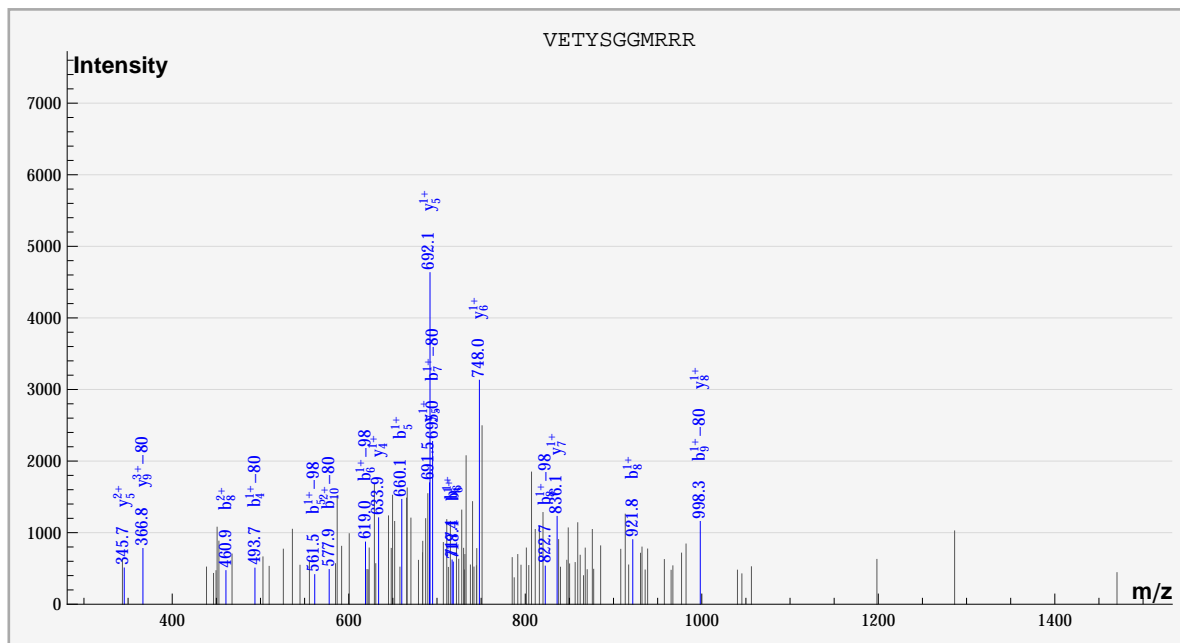

|   | #  | b | b* | #  | y | y* | P | P* |
|---|----|---|----|----|---|----|---|----|
| V | 1  |   |    |    |   |    |   |    |
| E | 2  |   |    | 10 |   |    |   |    |
| T | 3  |   |    | 9  |   | ✓  |   |    |
| Y | 4  | ✓ | ✓  | 8  | ✓ |    |   |    |
| S | 5  | ✓ | ✓  | 7  | ✓ |    |   |    |
| G | 6  | ✓ | ✓  | 6  | ✓ |    |   |    |
| G | 7  |   | ✓  | 5  | ✓ |    |   |    |
| M | 8  | ✓ | ✓  | 4  | ✓ |    |   |    |
| R | 9  |   | ✓  | 3  |   |    |   |    |
| R | 10 |   | ✓  | 2  |   |    |   |    |
| R | 11 |   |    | 1  |   |    |   |    |

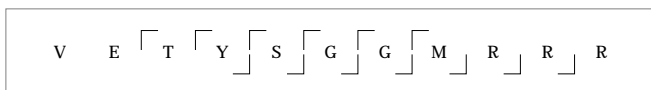

dbValid true GGYVDDLEFKGK PHOS(1) 2. 704. 0.313207 5.05675 100. ? 4998.

S\_Acido\_new%gi|68568119|gb|AAY81048.1| GGYVDDLEFKGK%::PHOS:::sample\_0%cmpd\_3406

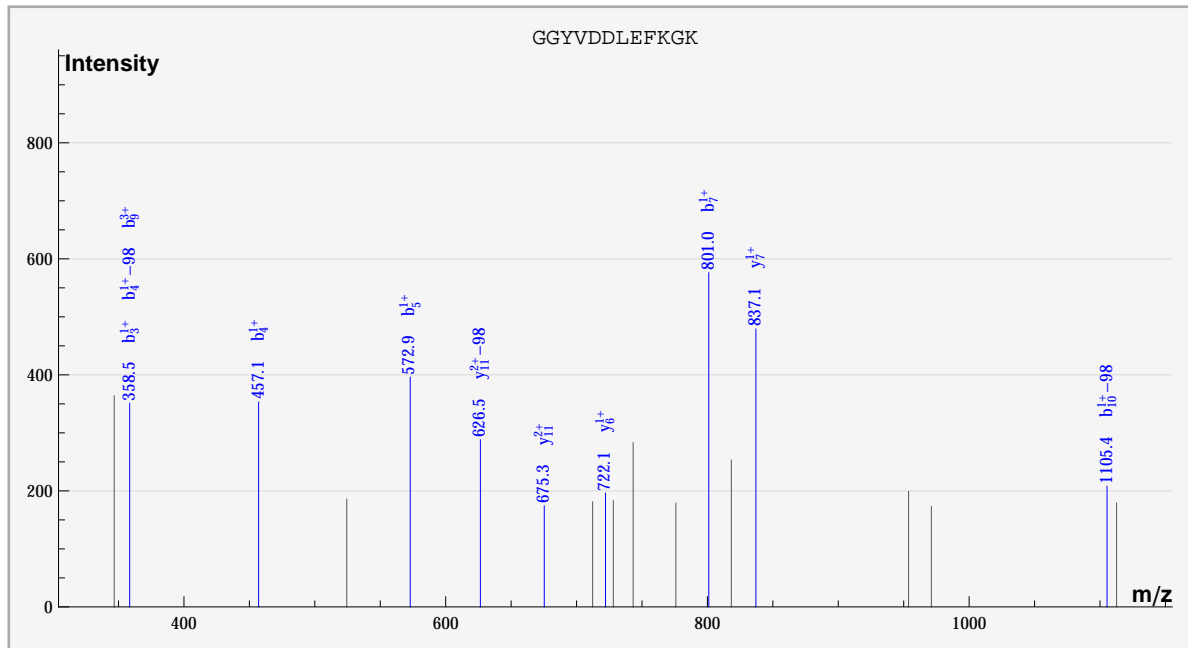

|   | #  | b | b* | #  | y | y* | P | P* |
|---|----|---|----|----|---|----|---|----|
| G | 1  |   |    |    |   |    |   |    |
| G | 2  |   |    | 11 | ✓ | ✓  |   |    |
| Y | 3  | ✓ |    | 10 |   |    |   |    |
| V | 4  | ✓ | ✓  | 9  |   |    |   |    |
| D | 5  | ✓ |    | 8  |   |    |   |    |
| D | 6  |   |    | 7  | ✓ |    |   |    |
| L | 7  | ✓ |    | 6  | ✓ |    |   |    |
| E | 8  |   |    | 5  |   |    |   |    |
| F | 9  | ✓ |    | 4  |   |    |   |    |
| K | 10 |   | ✓  | 3  |   |    |   |    |
| G | 11 |   |    | 2  |   |    |   |    |
| K | 12 |   |    | 1  |   |    |   |    |

G G Y V D D L E F K G K

dbValid true RGWTTLGVKTK PHOS(2) 2. 705. -1.16675 5.03141 100. ? 2640.  
 S\_Acido\_new%gi|68567076|gb|AA80005.1| RGWTTLGVKTK%::::PHOS::::PHOS::%sample\_0%cmpd\_1267

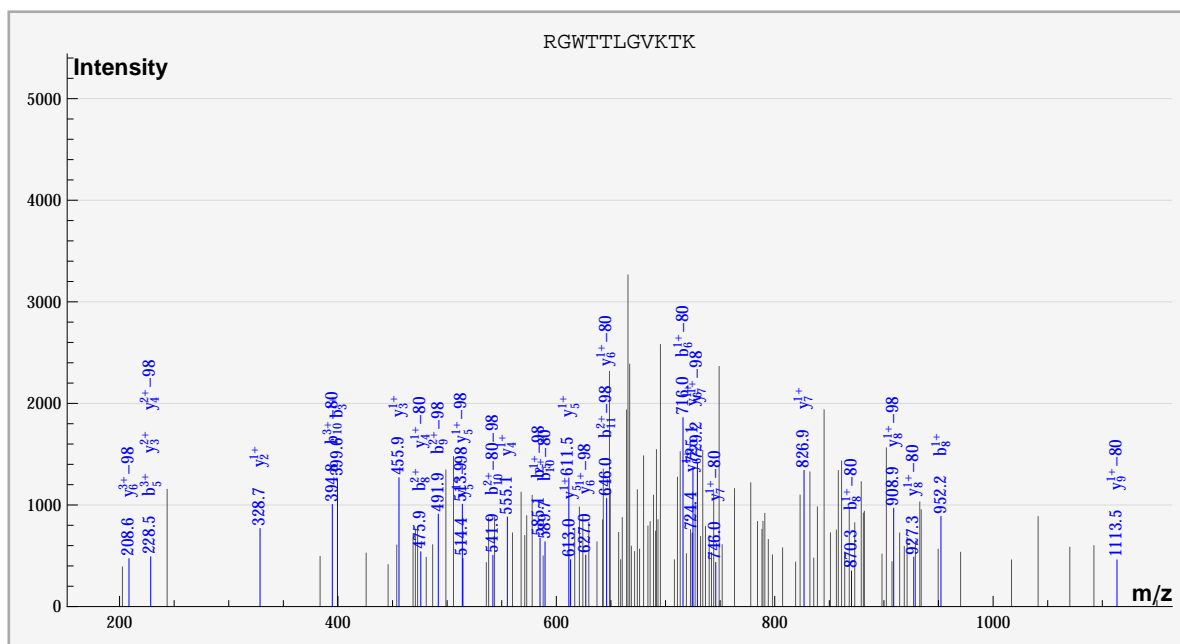

|   | #  | b | b* | #  | y | y* | P | P* |
|---|----|---|----|----|---|----|---|----|
| R | 1  |   |    |    |   |    |   |    |
| G | 2  |   |    | 10 |   |    |   |    |
| W | 3  | ✓ |    | 9  |   | ✓  |   |    |
| T | 4  |   |    | 8  |   | ✓  |   |    |
| T | 5  | ✓ | ✓  | 7  | ✓ | ✓  |   |    |
| L | 6  |   | ✓  | 6  | ✓ | ✓  |   |    |
| G | 7  |   |    | 5  | ✓ | ✓  |   |    |
| V | 8  | ✓ | ✓  | 4  | ✓ | ✓  |   |    |
| K | 9  |   | ✓  | 3  | ✓ |    |   |    |
| T | 10 |   | ✓  | 2  | ✓ |    |   |    |
| K | 11 |   | ✓  | 1  |   |    |   |    |

R G W T T L G V K T K

dbValid true VKDYILSFGER PHOS(1) 2. 705. -1.1606 5.0583 100. ? 3468.  
 S\_Acido\_new%gil68567813|gb|AAY80742.1| VKDYILSFGER%::::::PHOS:::::sample\_1%cmpd\_1893

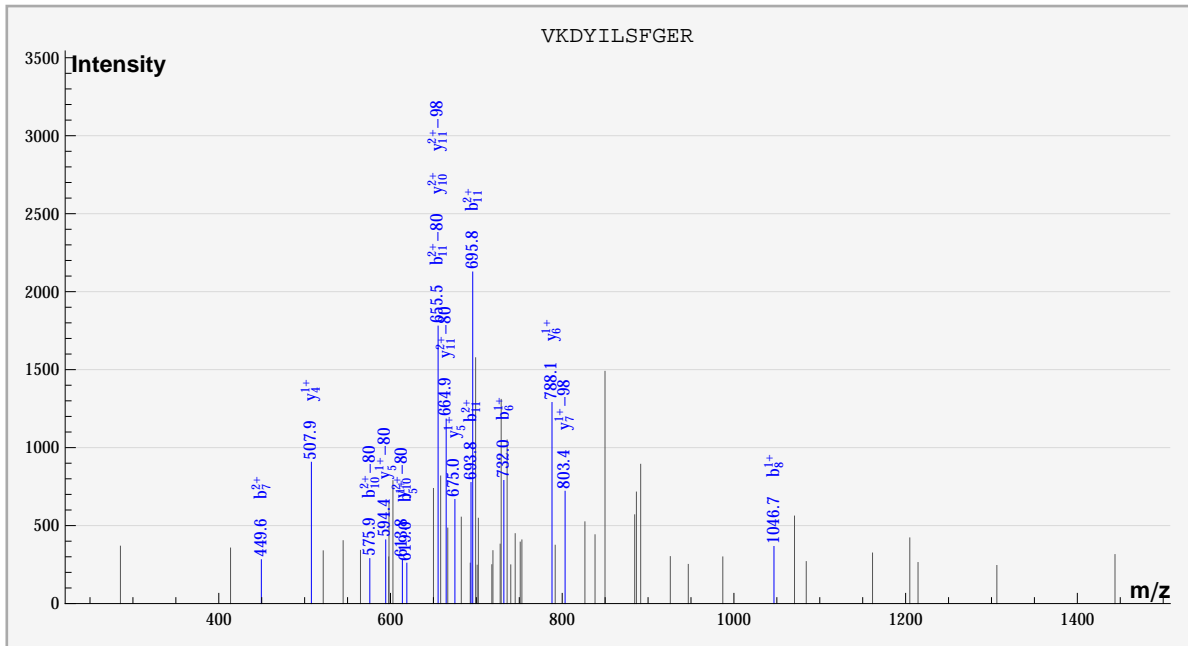

|   | #  | b | b* | #  | y | y* | P | P* |
|---|----|---|----|----|---|----|---|----|
| V | 1  |   |    |    |   |    |   | ✓  |
| K | 2  |   |    | 10 | ✓ | ✓  |   |    |
| D | 3  |   |    | 9  |   |    |   |    |
| Y | 4  |   |    | 8  |   |    |   |    |
| I | 5  | ✓ |    | 7  |   | ✓  |   |    |
| L | 6  | ✓ |    | 6  | ✓ |    |   |    |
| S | 7  | ✓ |    | 5  | ✓ | ✓  |   |    |
| F | 8  | ✓ |    | 4  | ✓ |    |   |    |
| G | 9  |   |    | 3  |   |    |   |    |
| E | 10 |   | ✓  | 2  |   |    |   |    |
| R | 11 | ✓ | ✓  | 1  |   |    |   |    |

V K D Y I L S F G E R

dbValid true VYVSFGEEKDR PHOS(1) 2. 706. -1.18916 5.02445 100. ? 2742.  
 S\_Acido\_new%gi|68567523|gb|AAV80452.1| VYVSFGEEKDR%::::PHOS:::::sample\_1%compd\_1275

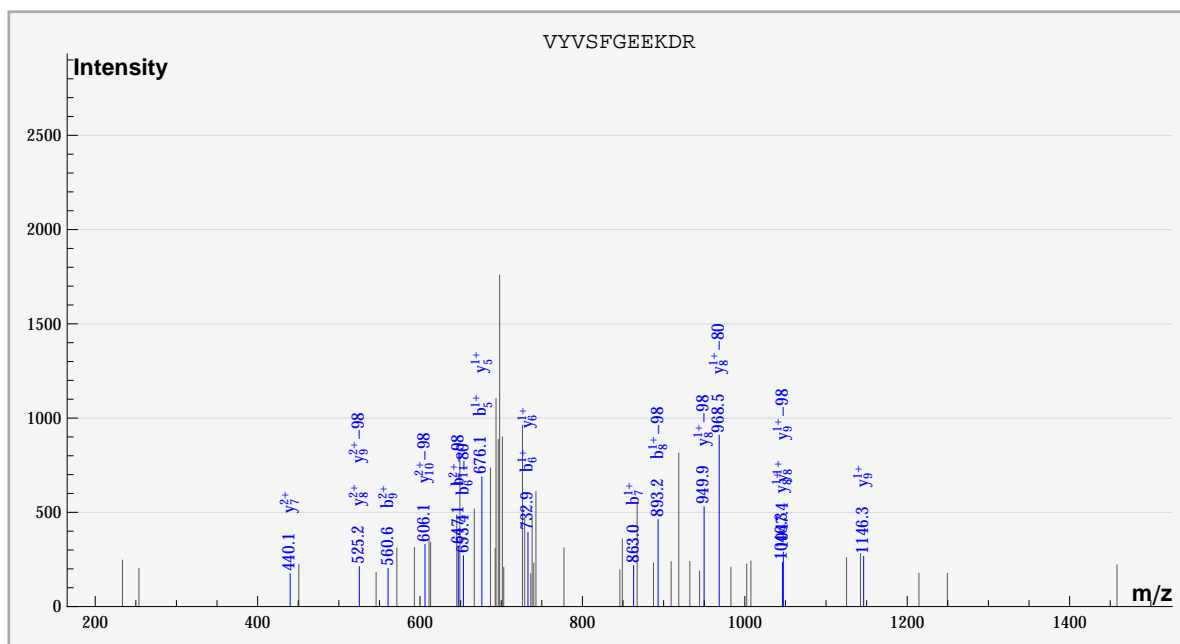

|   | #  | b | b* | #  | y | y* | P | P* |
|---|----|---|----|----|---|----|---|----|
| V | 1  |   |    |    |   |    |   |    |
| Y | 2  |   |    | 10 |   | ✓  |   |    |
| V | 3  |   |    | 9  | ✓ | ✓  |   |    |
| S | 4  |   |    | 8  | ✓ | ✓  |   |    |
| F | 5  | ✓ |    | 7  | ✓ |    |   |    |
| G | 6  | ✓ | ✓  | 6  | ✓ |    |   |    |
| E | 7  | ✓ |    | 5  | ✓ |    |   |    |
| E | 8  |   | ✓  | 4  |   |    |   |    |
| K | 9  | ✓ |    | 3  |   |    |   |    |
| D | 10 |   |    | 2  |   |    |   |    |
| R | 11 |   | ✓  | 1  |   |    |   |    |

V Y V S F G E E K D R





dbValid true TKNILNFEIK PHOS(1) 2. 706. 0.881067 5.40527 100. ? 3978.  
 S\_Acido\_new%gi68567122|gb|AAY80051.1| TKNILNFEIK%:PHOS:.....%sample\_0%cmpd\_2486

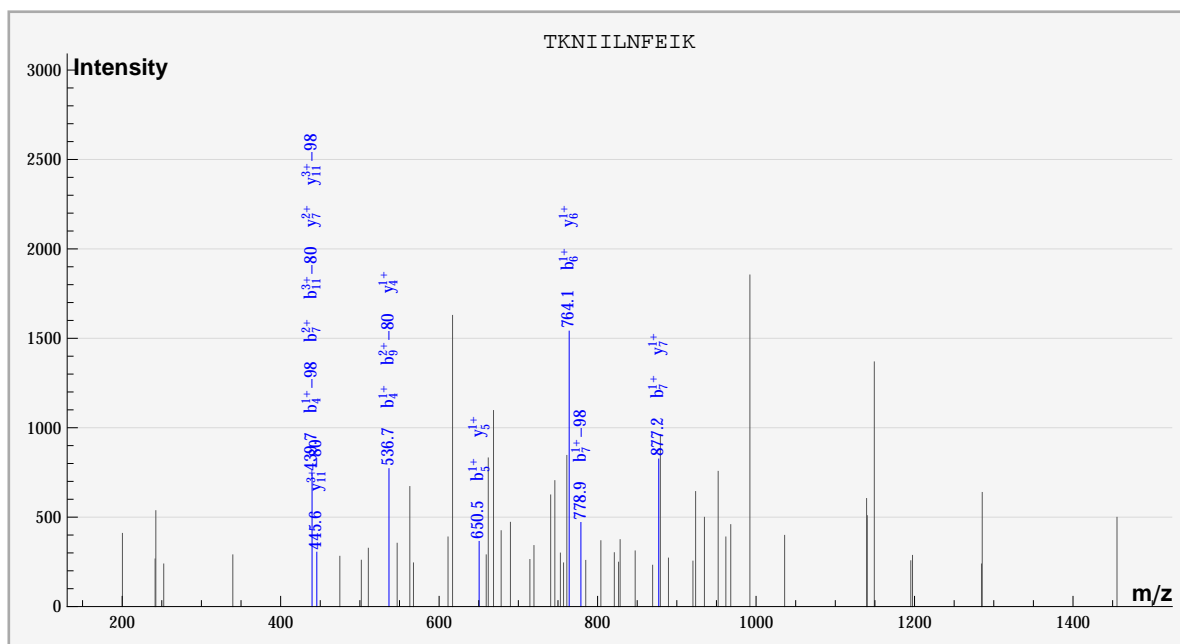

|   | #  | b | b* | #  | y | y* | P | P* |
|---|----|---|----|----|---|----|---|----|
| T | 1  |   |    |    |   |    |   | ✓  |
| K | 2  |   |    | 10 |   |    |   |    |
| N | 3  |   |    | 9  |   |    |   |    |
| I | 4  | ✓ | ✓  | 8  |   |    |   |    |
| I | 5  | ✓ |    | 7  | ✓ |    |   |    |
| L | 6  | ✓ |    | 6  | ✓ |    |   |    |
| N | 7  | ✓ | ✓  | 5  | ✓ |    |   |    |
| F | 8  |   |    | 4  | ✓ |    |   |    |
| E | 9  |   | ✓  | 3  |   |    |   |    |
| I | 10 |   |    | 2  |   |    |   |    |
| K | 11 |   | ✓  | 1  |   |    |   |    |

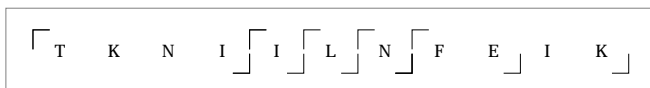

dbValid true QYQMTNLLK PHOS(2) 2. 707. -0.212333 5.23597 100. ? 1566.  
 S\_Acido\_new%gi|68567719|gb|AAy80648.1| QYQMTNLLK%::PHOS::PHOS:::sample\_3%compd\_274

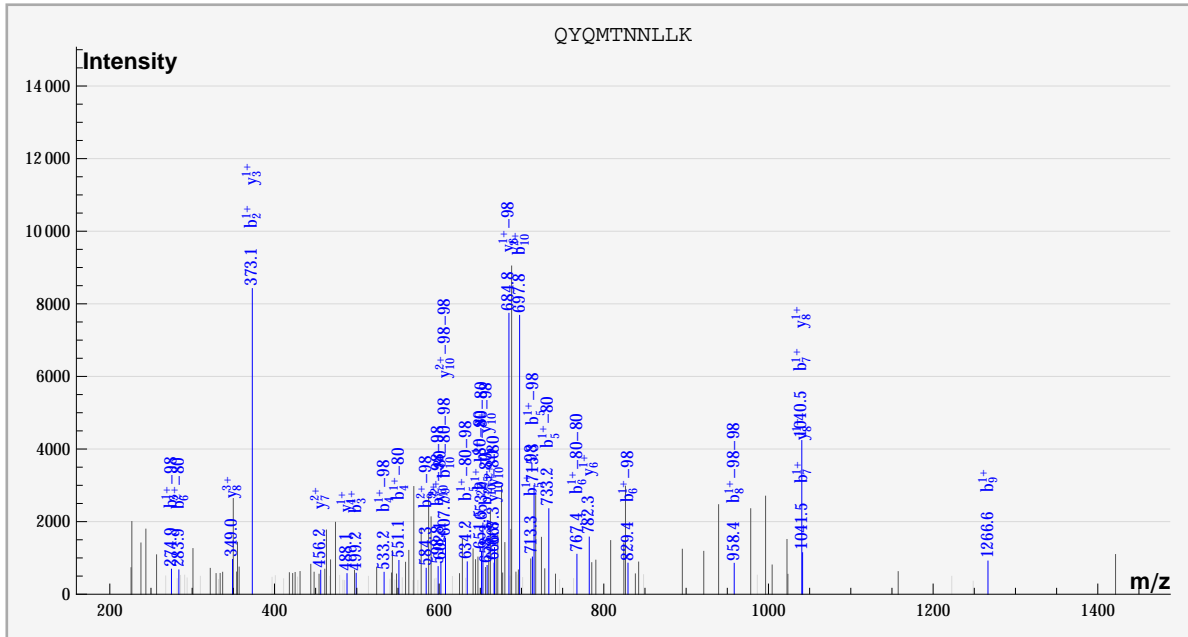

|   | #  | b | b* | # | y | y* | P | P* |
|---|----|---|----|---|---|----|---|----|
| Q | 1  |   |    |   |   |    |   | ✓  |
| Y | 2  | ✓ | ✓  | 9 |   | ✓  |   |    |
| Q | 3  | ✓ |    | 8 | ✓ |    |   |    |
| M | 4  |   | ✓  | 7 | ✓ |    |   |    |
| T | 5  |   | ✓  | 6 | ✓ | ✓  |   |    |
| N | 6  |   | ✓  | 5 |   |    |   |    |
| N | 7  | ✓ |    | 4 | ✓ |    |   |    |
| L | 8  |   | ✓  | 3 | ✓ |    |   |    |
| L | 9  | ✓ | ✓  | 2 |   |    |   |    |
| K | 10 | ✓ | ✓  | 1 |   |    |   |    |

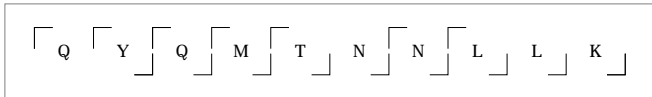

dbValid true QYQMTNNLLK PHOS(2) 2. 707. -0.212333 5.11759 100. ? 1578.  
 S\_Acido\_new%gi|68567719|gb|AAy80648.1| QYQMTNNLLK%::PHOS::PHOS:::sample\_3%compd\_285

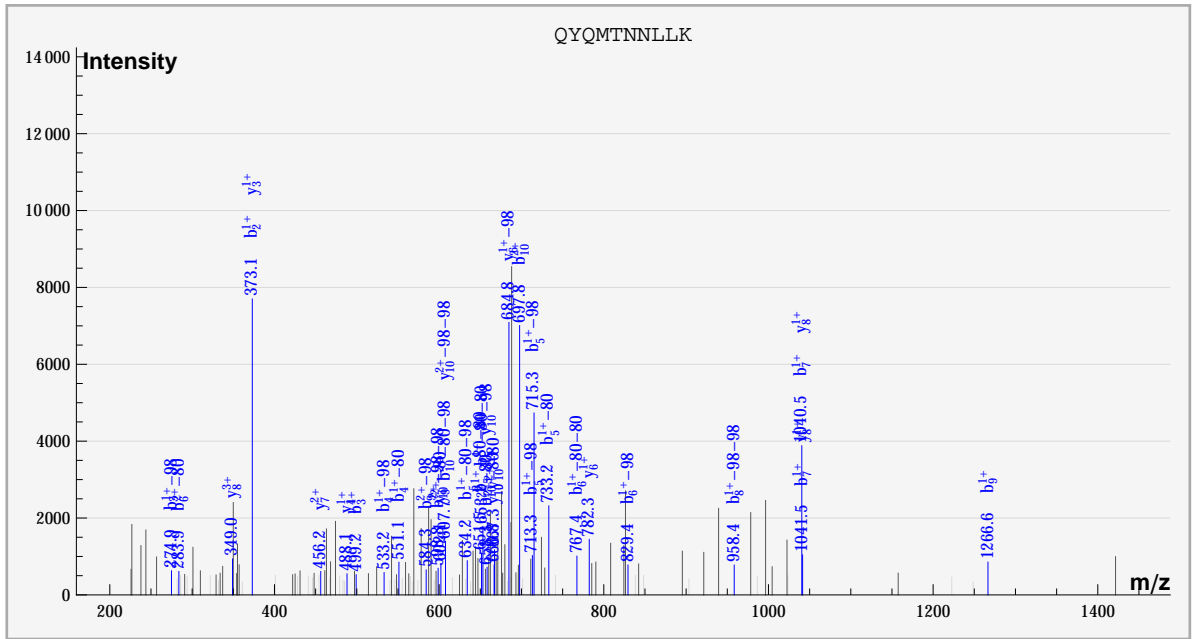

|   | #  | b | b* | # | y | y* | P | P* |
|---|----|---|----|---|---|----|---|----|
| Q | 1  |   |    |   |   |    |   | ✓  |
| Y | 2  | ✓ | ✓  | 9 |   | ✓  |   |    |
| Q | 3  | ✓ |    | 8 | ✓ |    |   |    |
| M | 4  |   | ✓  | 7 | ✓ |    |   |    |
| T | 5  |   | ✓  | 6 | ✓ | ✓  |   |    |
| N | 6  |   | ✓  | 5 |   |    |   |    |
| N | 7  | ✓ |    | 4 | ✓ |    |   |    |
| L | 8  |   | ✓  | 3 | ✓ |    |   |    |
| L | 9  | ✓ | ✓  | 2 |   |    |   |    |
| K | 10 | ✓ | ✓  | 1 |   |    |   |    |

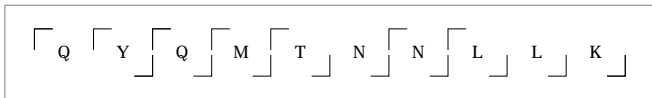

dbValid true TKNILNFEIK PHOS(1) 2. 707. -0.118933 5.51935 100. ? 3666.  
 S\_Acido\_new%gi|68567122|gb|AA80051.1| TKNILNFEIK%:PHOS:.....%sample\_0%compd\_2200

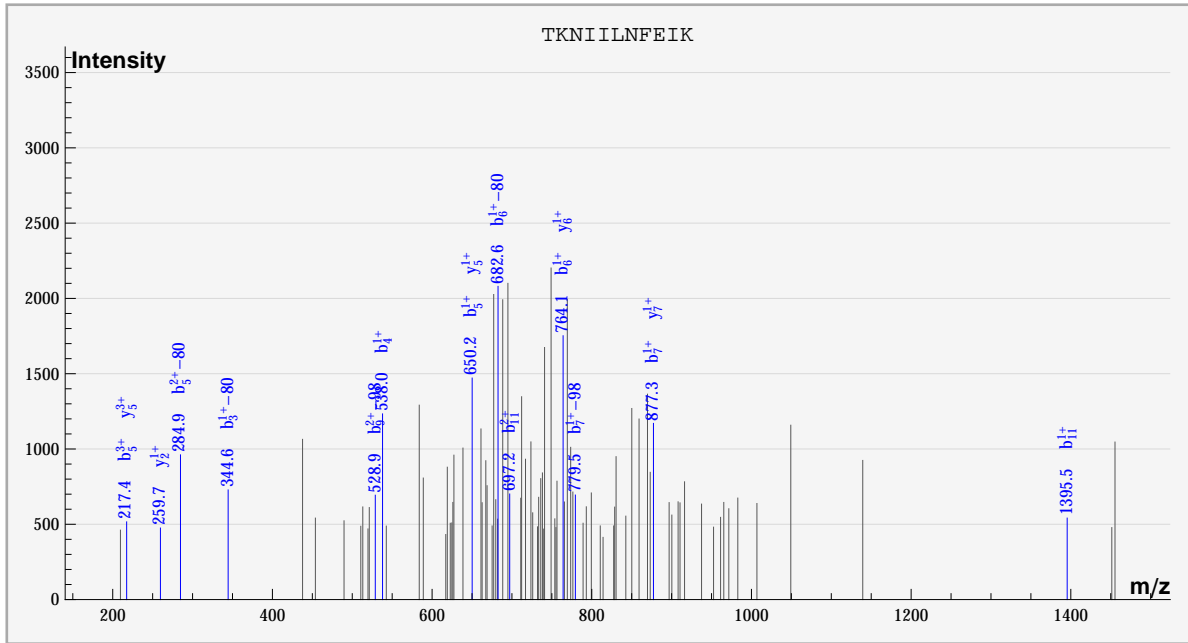

|   | #  | b | b* | #  | y | y* | P | P* |
|---|----|---|----|----|---|----|---|----|
| T | 1  |   |    |    |   |    |   |    |
| K | 2  |   |    | 10 |   |    |   |    |
| N | 3  |   | ✓  | 9  |   |    |   |    |
| I | 4  | ✓ |    | 8  |   |    |   |    |
| I | 5  | ✓ | ✓  | 7  | ✓ |    |   |    |
| L | 6  | ✓ | ✓  | 6  | ✓ |    |   |    |
| N | 7  | ✓ | ✓  | 5  | ✓ |    |   |    |
| F | 8  |   |    | 4  |   |    |   |    |
| E | 9  |   | ✓  | 3  |   |    |   |    |
| I | 10 |   |    | 2  | ✓ |    |   |    |
| K | 11 | ✓ |    | 1  |   |    |   |    |

T K N I I L N F E I K

dbValid true KYIPEIVSVRK PHOS(1) 2. 708. -1.61094 5.0703 100. ? 1710.  
 S\_Acido\_new%gi|68567723|gb|AA80652.1| KYIPEIVSVRK%::PHOS%:::sample\_0%compd\_420

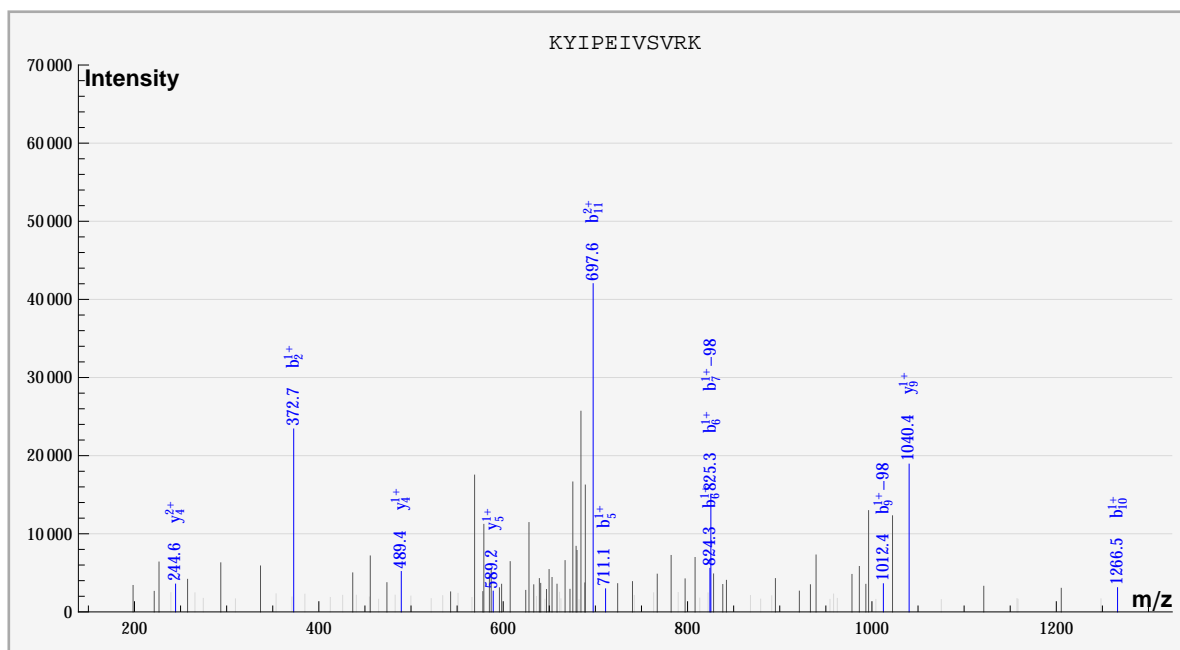

|   | #  | b | b* | #  | y | y* | P | P* |
|---|----|---|----|----|---|----|---|----|
| K | 1  |   |    |    |   |    |   |    |
| Y | 2  | ✓ |    | 10 |   |    |   |    |
| I | 3  |   |    | 9  | ✓ |    |   |    |
| P | 4  |   |    | 8  |   |    |   |    |
| E | 5  | ✓ |    | 7  |   |    |   |    |
| I | 6  | ✓ |    | 6  |   |    |   |    |
| V | 7  |   | ✓  | 5  | ✓ |    |   |    |
| S | 8  |   |    | 4  | ✓ |    |   |    |
| V | 9  |   | ✓  | 3  |   |    |   |    |
| R | 10 | ✓ |    | 2  |   |    |   |    |
| K | 11 | ✓ |    | 1  |   |    |   |    |

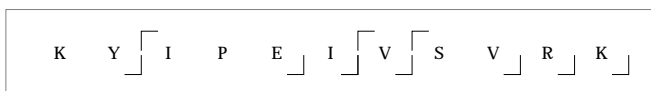



dbValid true SRTYQNQETK PHOS(2) 2. 709. -1.2264 5.25286 100. ? 1638.

S\_Acido\_new%gil68567068|gb|AAY79997.1| SRTYQNQETK%::::PHOS::::PHOS::%sample\_0%compd\_356

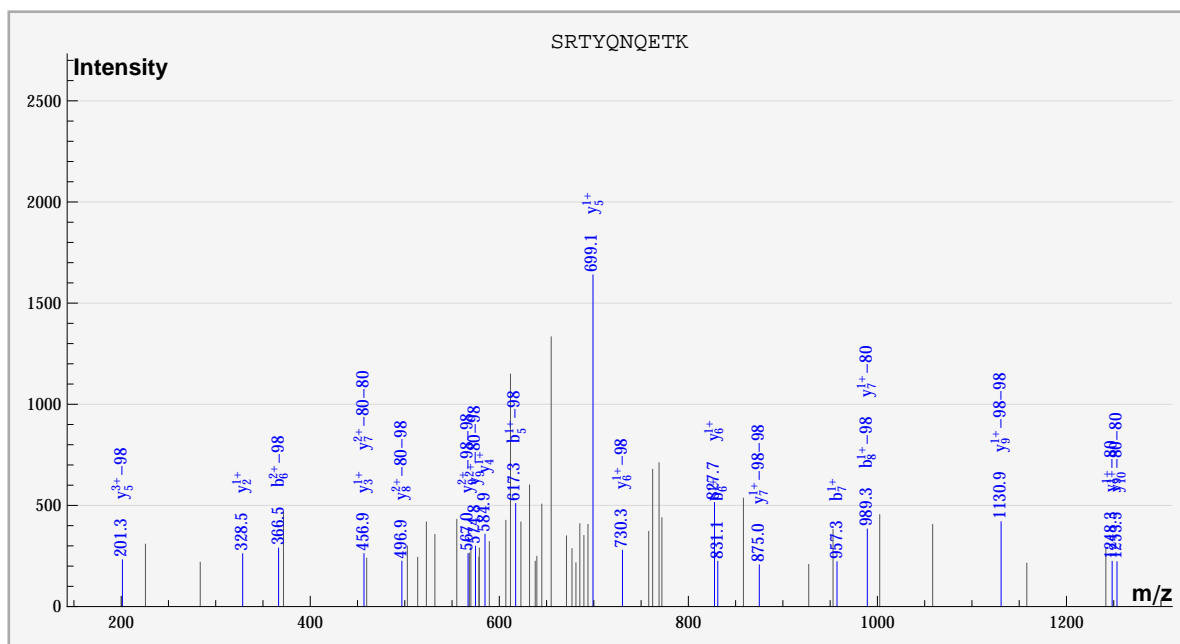

|   | #  | b | b* | # | y | y* | P | P* |
|---|----|---|----|---|---|----|---|----|
| S | 1  |   |    |   |   |    |   | ✓  |
| R | 2  |   |    | 9 |   |    |   | ✓  |
| T | 3  |   |    | 8 |   |    |   | ✓  |
| Y | 4  |   |    | 7 |   |    |   | ✓  |
| Q | 5  |   | ✓  | 6 |   | ✓  | ✓ |    |
| N | 6  | ✓ | ✓  | 5 |   | ✓  | ✓ |    |
| Q | 7  | ✓ |    | 4 |   | ✓  |   |    |
| E | 8  |   | ✓  | 3 |   | ✓  |   |    |
| T | 9  |   |    | 2 |   | ✓  |   |    |
| K | 10 |   |    | 1 |   |    |   |    |

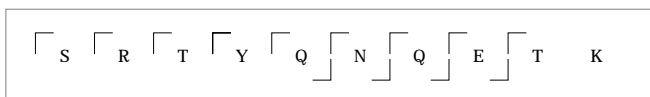



dbValid true VEYPIARDK PHOS(2) 2. 709. -1.70383 5.02779 100. ? 2550.

S\_Acido\_new%gi|68568429|gb|AAY81358.1| VEYPIARDK%::PHOS:PHOS:::sample\_3%cmpd\_1123

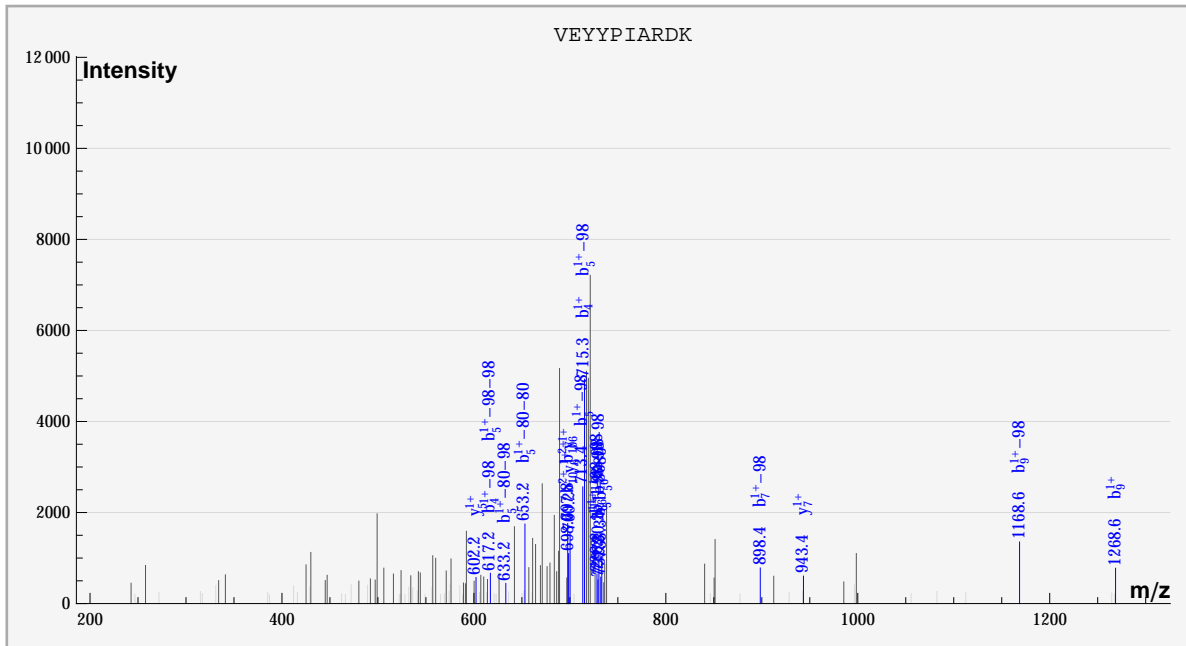

|   | #  | b | b* | # | y | y* | P | P* |
|---|----|---|----|---|---|----|---|----|
| V | 1  |   |    |   |   |    |   |    |
| E | 2  |   |    | 9 |   |    |   |    |
| Y | 3  |   |    | 8 |   |    |   |    |
| Y | 4  | ✓ | ✓  | 7 | ✓ |    |   |    |
| P | 5  |   | ✓  | 6 | ✓ |    |   |    |
| I | 6  |   | ✓  | 5 | ✓ |    |   |    |
| A | 7  |   | ✓  | 4 |   |    |   |    |
| R | 8  |   |    | 3 |   |    |   |    |
| D | 9  | ✓ | ✓  | 2 |   |    |   |    |
| K | 10 | ✓ |    | 1 |   |    |   |    |

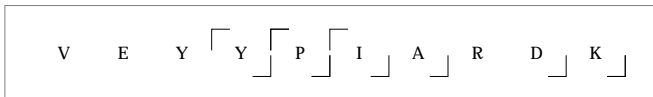

dbValid true VEYPIARDK PHOS(2) 2. 709. -1.70383 4.96562 100. ? 2598.

S\_Acido\_new%gi68568429|gb|AAY81358.1| VEYPIARDK%::PHOS:PHOS:::sample\_3%compd\_1164

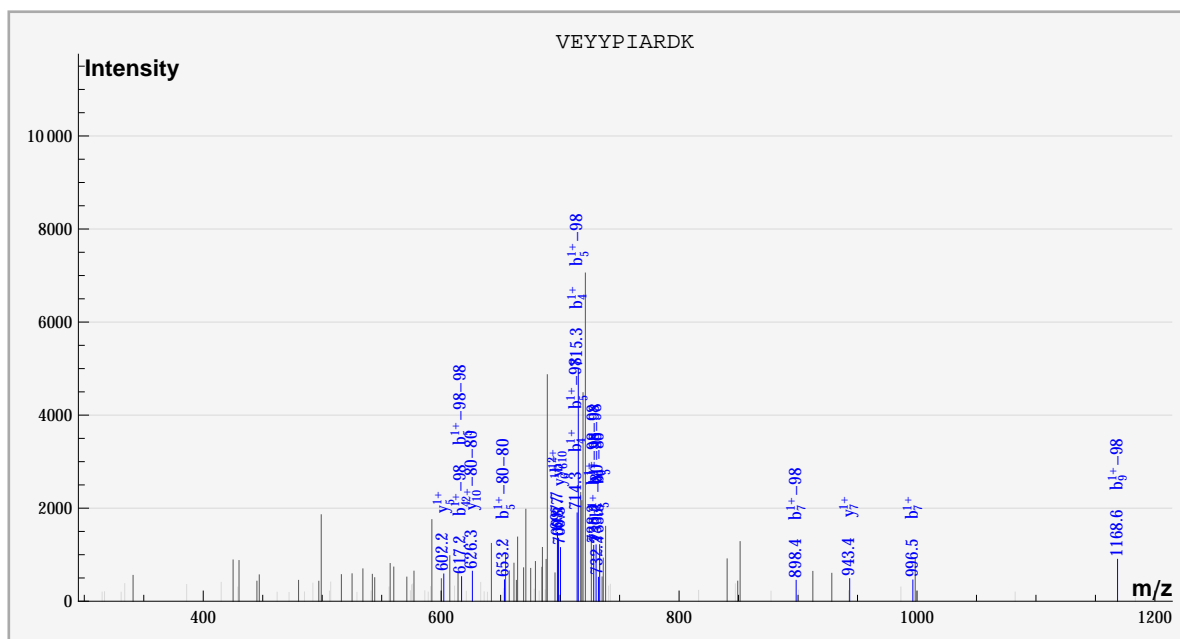

|   | #  | b | b* | # | y | y* | P | P* |
|---|----|---|----|---|---|----|---|----|
| V | 1  |   |    |   |   |    |   | ✓  |
| E | 2  |   |    | 9 |   |    |   |    |
| Y | 3  |   |    | 8 |   |    |   |    |
| Y | 4  | ✓ | ✓  | 7 | ✓ |    |   |    |
| P | 5  |   | ✓  | 6 | ✓ |    |   |    |
| I | 6  |   | ✓  | 5 | ✓ |    |   |    |
| A | 7  | ✓ | ✓  | 4 |   |    |   |    |
| R | 8  |   |    | 3 |   |    |   |    |
| D | 9  |   | ✓  | 2 |   |    |   |    |
| K | 10 | ✓ |    | 1 |   |    |   |    |

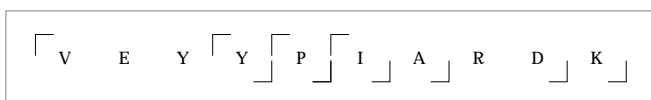

dbValid true NTFYVQCYSR Cys\_CAM(1),PHOS(1) 2. 709. 0.283947 5.01114 100. ? 3726.  
 S\_Acido\_new%gil68567336|gb|AAI80265.1| NTFYVQCYSR%::PHOS::::Cys\_CAM::::%sample\_0%compd\_2258

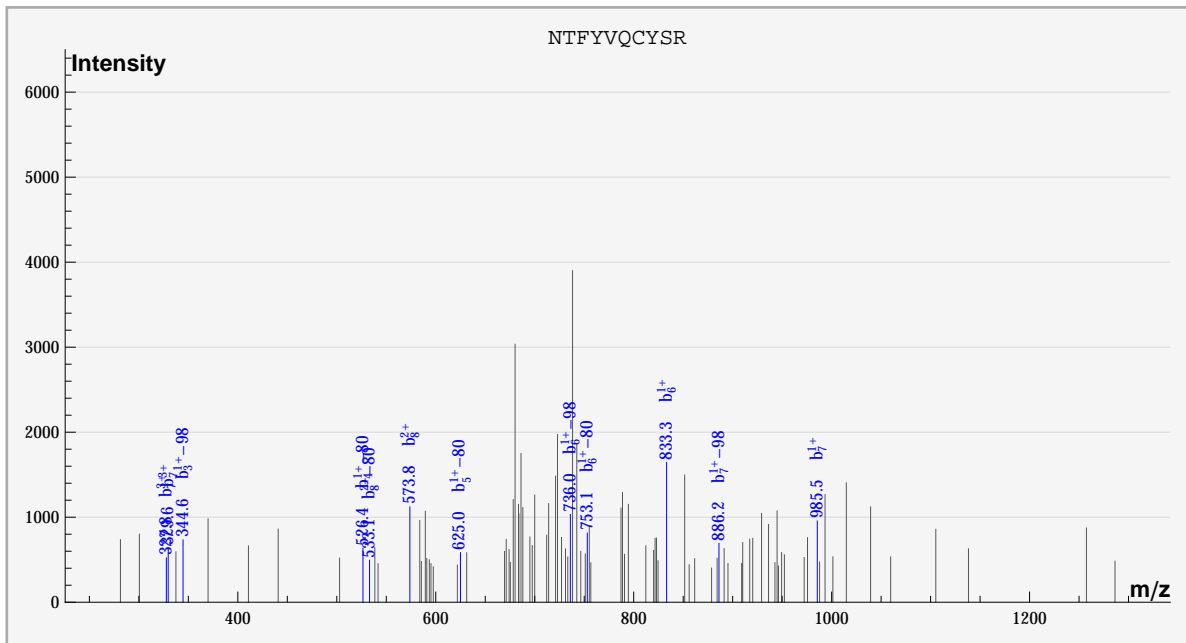

|   | #  | b | b* | # | y | y* | P | P* |
|---|----|---|----|---|---|----|---|----|
| N | 1  |   |    |   |   |    |   |    |
| T | 2  |   |    | 9 |   |    |   |    |
| F | 3  | ✓ |    | 8 |   |    |   |    |
| Y | 4  | ✓ |    | 7 |   |    |   |    |
| V | 5  | ✓ |    | 6 |   |    |   |    |
| Q | 6  | ✓ | ✓  | 5 |   |    |   |    |
| C | 7  | ✓ | ✓  | 4 |   |    |   |    |
| Y | 8  | ✓ | ✓  | 3 |   |    |   |    |
| S | 9  |   |    | 2 |   |    |   |    |
| R | 10 |   |    | 1 |   |    |   |    |

N T F Y V Q C Y S R



dbValid true GIVTIK PHOS(1) 1. 711. -0.615215 5.82301 100. ? 2502.  
 S\_Acido\_new%gi|68566726|gb|AAY79655.1| GIVTIK%:::PHOS:::sample\_3%compd\_1144

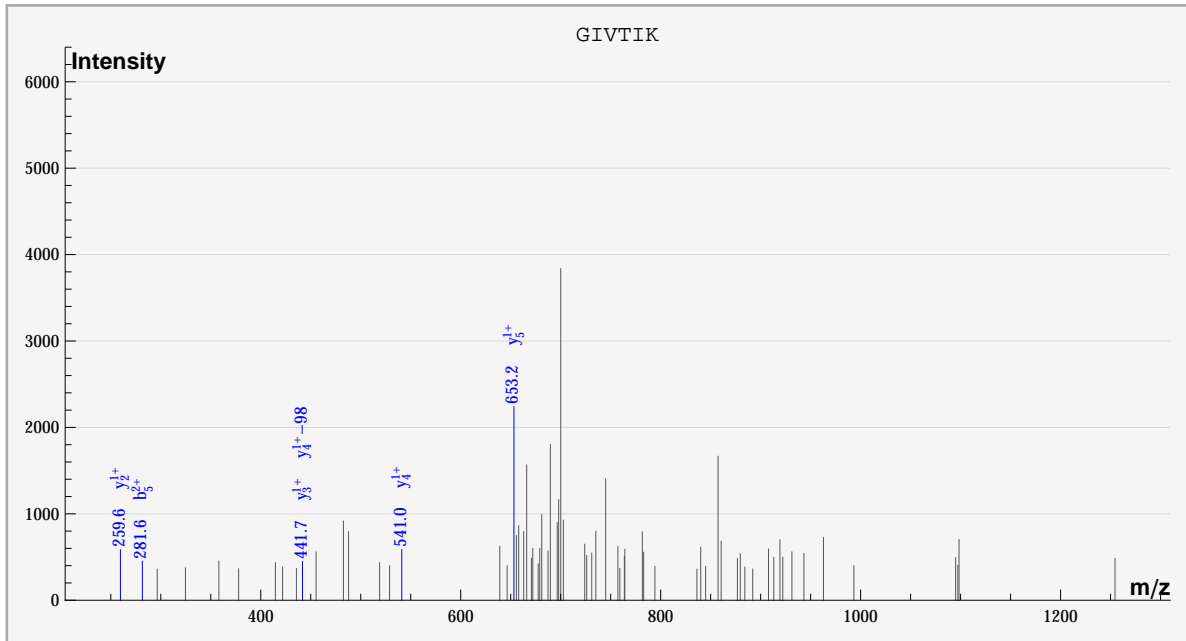

|   | # | b | b* | # | y | y* | P | P* |
|---|---|---|----|---|---|----|---|----|
| G | 1 |   |    |   |   |    |   |    |
| I | 2 |   |    | 5 | ✓ |    |   |    |
| V | 3 |   |    | 4 | ✓ | ✓  |   |    |
| T | 4 |   |    | 3 | ✓ |    |   |    |
| I | 5 | ✓ |    | 2 | ✓ |    |   |    |
| K | 6 |   |    | 1 |   |    |   |    |

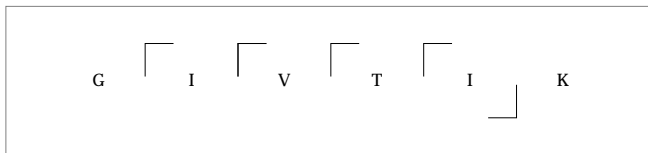

dbValid true NISGIK PHOS(1) 1. 713. -1.65635 5.54755 100. ? 2202.  
 S\_Acido\_new%gi|68568427|gb|AAY81356.1| NISGIK%:::PHOS:::%sample\_0%compd\_833

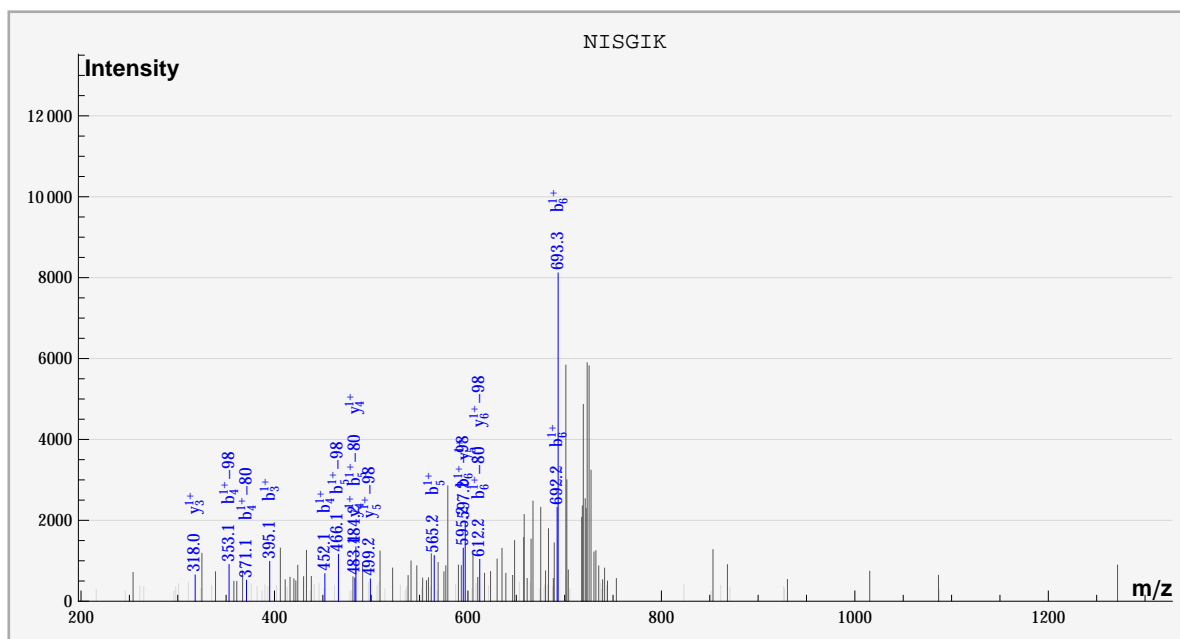

|   | # | b | b* | # | y | y* | P | P* |
|---|---|---|----|---|---|----|---|----|
| N | 1 |   |    |   |   |    |   | ✓  |
| I | 2 |   |    | 5 | ✓ | ✓  |   |    |
| S | 3 | ✓ |    | 4 | ✓ |    |   |    |
| G | 4 | ✓ | ✓  | 3 | ✓ |    |   |    |
| I | 5 | ✓ | ✓  | 2 |   |    |   |    |
| K | 6 | ✓ | ✓  | 1 |   |    |   |    |

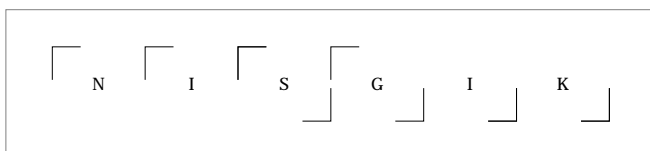

dbValid true NISGIK PHOS(1) 1. 713. -1.65635 5.8555 100. ? 2214.  
 S\_Acido\_new%gi|68568427|gb|AAY81356.1| NISGIK%:::PHOS:::%sample\_0%cmpd\_844

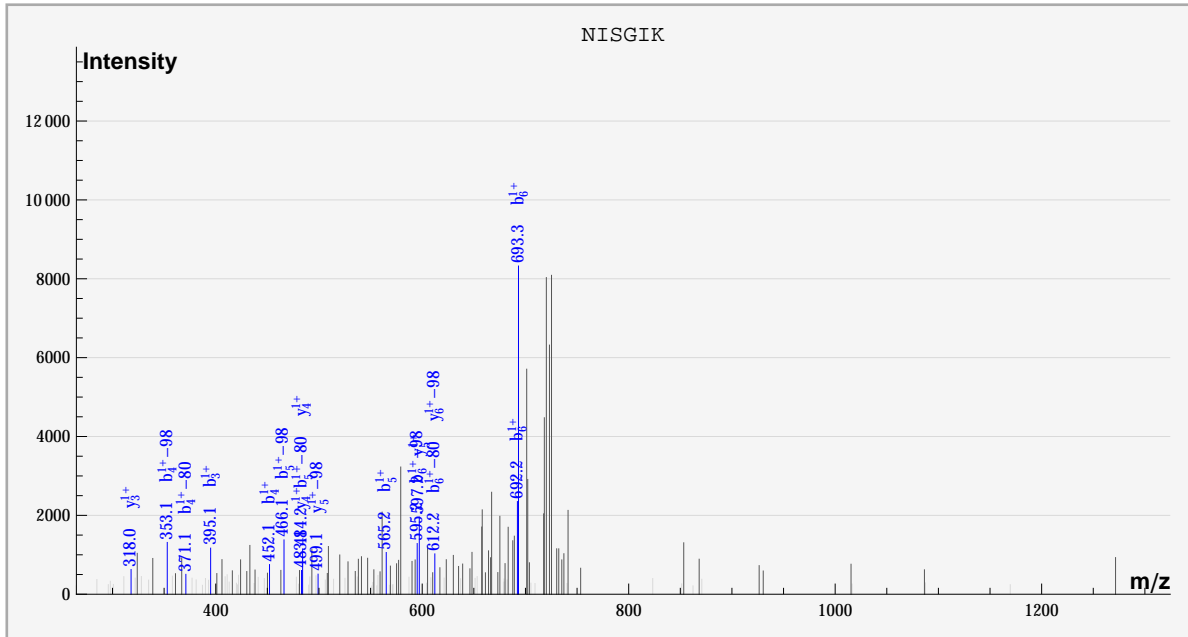

|   | # | b | b* | # | y | y* | P | P* |
|---|---|---|----|---|---|----|---|----|
| N | 1 |   |    |   |   |    |   | ✓  |
| I | 2 |   |    | 5 | ✓ | ✓  |   |    |
| S | 3 | ✓ |    | 4 | ✓ |    |   |    |
| G | 4 | ✓ | ✓  | 3 | ✓ |    |   |    |
| I | 5 | ✓ | ✓  | 2 |   |    |   |    |
| K | 6 | ✓ | ✓  | 1 |   |    |   |    |

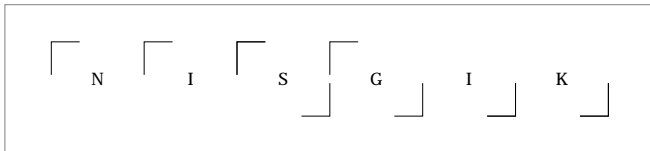

dbValid true TTTIAK PHOS(1) 1. 713. 1.34333 5.11985 100. ? 2694.  
 S\_Acido\_new%gi|68567854|gb|AAY80783.1| TTTIAK%:::PHOS:::%sample\_3%compd\_1323

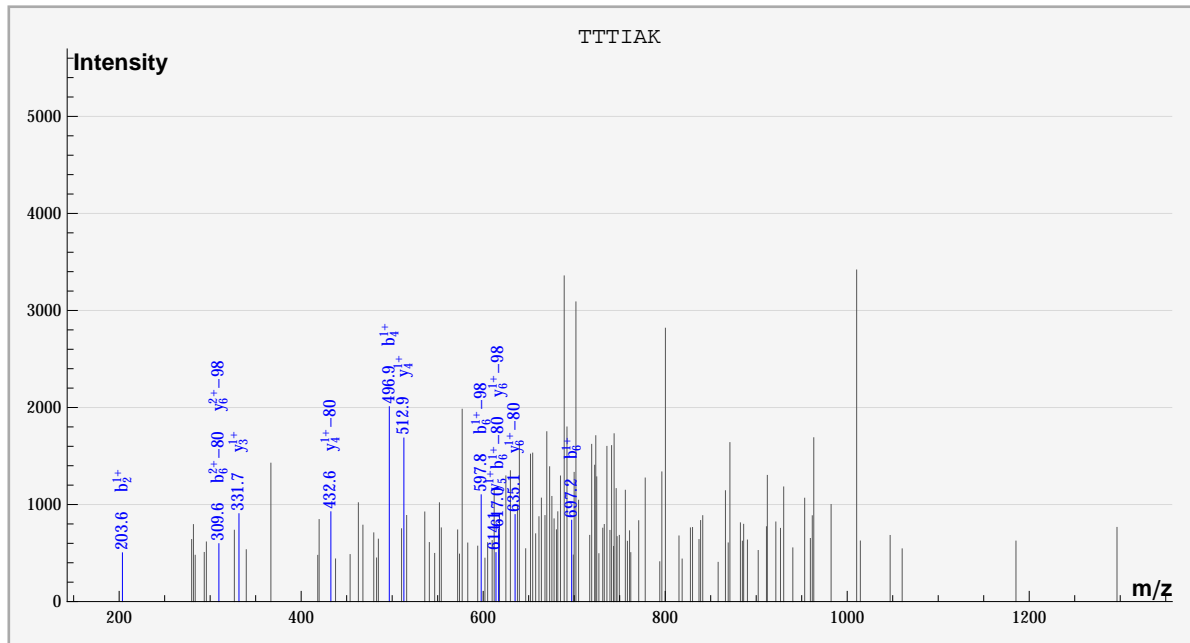

|   | # | b | b* | # | y | y* | P | P* |
|---|---|---|----|---|---|----|---|----|
| T | 1 |   |    |   |   |    |   | ✓  |
| T | 2 | ✓ |    | 5 | ✓ |    |   |    |
| T | 3 |   |    | 4 | ✓ | ✓  |   |    |
| I | 4 | ✓ |    | 3 | ✓ |    |   |    |
| A | 5 |   |    | 2 |   |    |   |    |
| K | 6 | ✓ | ✓  | 1 |   |    |   |    |

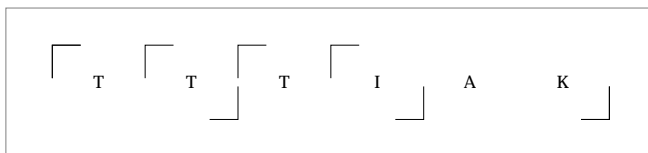



dbValid true DISNLA PHOS(1) 1. 713. -0.708715 5.31404 100. ? 3534.  
 S\_Acido\_new%gi|68568442|gb|AAY81371.1| DISNLA%:::PHOS:::%sample\_3%cmpd\_2087

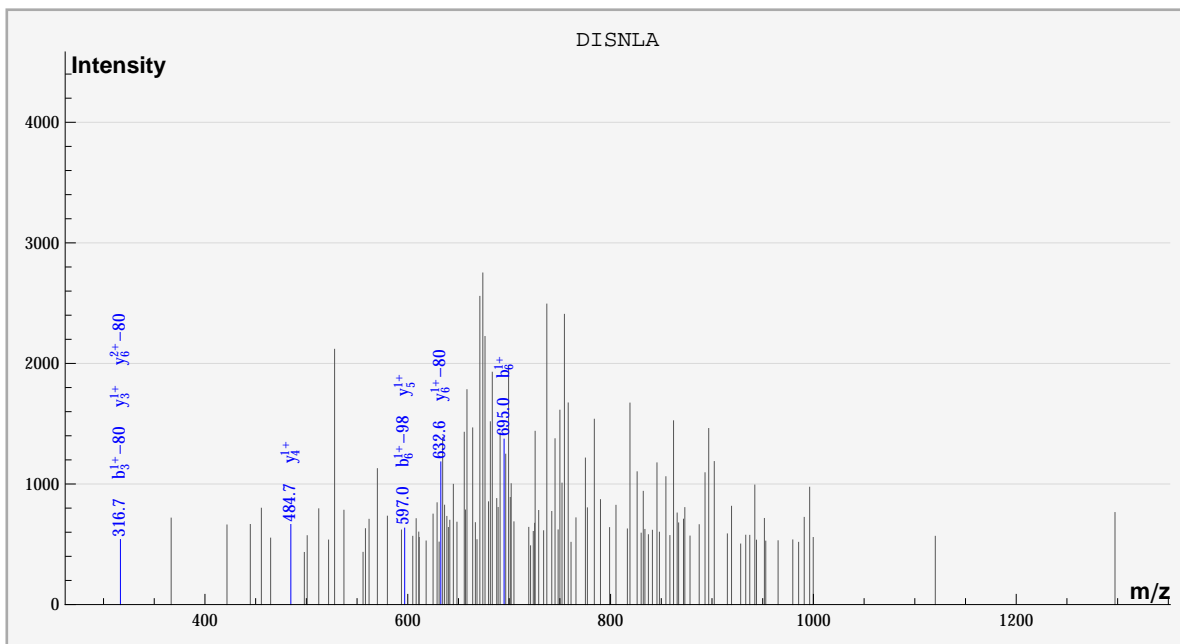

|   | # | b | b* | # | y | y* | P | P* |
|---|---|---|----|---|---|----|---|----|
| D | 1 |   |    |   |   |    |   | ✓  |
| I | 2 |   |    | 5 | ✓ |    |   |    |
| S | 3 | ✓ |    | 4 | ✓ |    |   |    |
| N | 4 |   |    | 3 | ✓ |    |   |    |
| L | 5 |   |    | 2 |   |    |   |    |
| A | 6 | ✓ | ✓  | 1 |   |    |   |    |

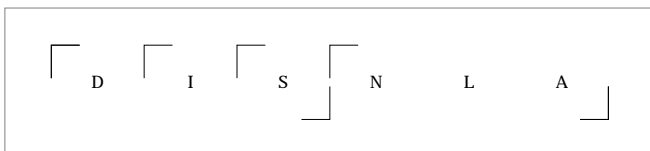

dbValid true FWYLSTKYR PHOS(2) 2. 713. -0.704023 5.01919 100. ? 4290.  
 S\_Acido\_new%gi|68566644|gb|AA79573.1| FWYLSTKYR%:::PHOS:::PHOS::%sample\_3%compd\_2773

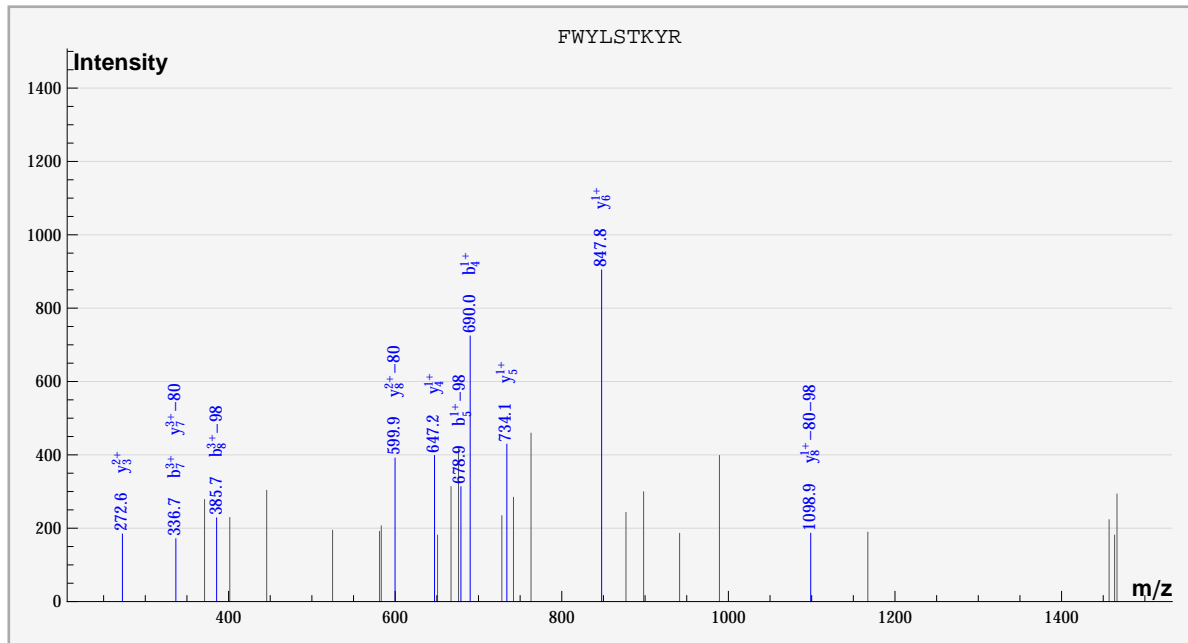

|   | # | b | b* | # | y | y* | P | P* |
|---|---|---|----|---|---|----|---|----|
| F | 1 |   |    |   |   |    |   |    |
| W | 2 |   |    | 8 |   | ✓  |   |    |
| Y | 3 |   |    | 7 |   | ✓  |   |    |
| L | 4 | ✓ |    | 6 |   | ✓  |   |    |
| S | 5 |   | ✓  | 5 |   | ✓  |   |    |
| T | 6 |   |    | 4 |   | ✓  |   |    |
| K | 7 | ✓ |    | 3 |   | ✓  |   |    |
| Y | 8 |   | ✓  | 2 |   |    |   |    |
| R | 9 |   |    | 1 |   |    |   |    |

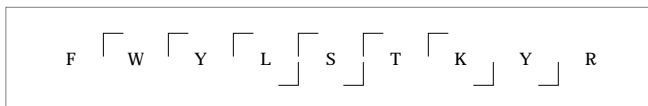

dbValid true DISNLA PHOS(1) 1. 714. -1.70872 5.23413 100. ? 2130.  
 S\_Acido\_new%gi|68568442|gb|AAY81371.1| DISNLA%:::PHOS:::%sample\_0%compd\_771

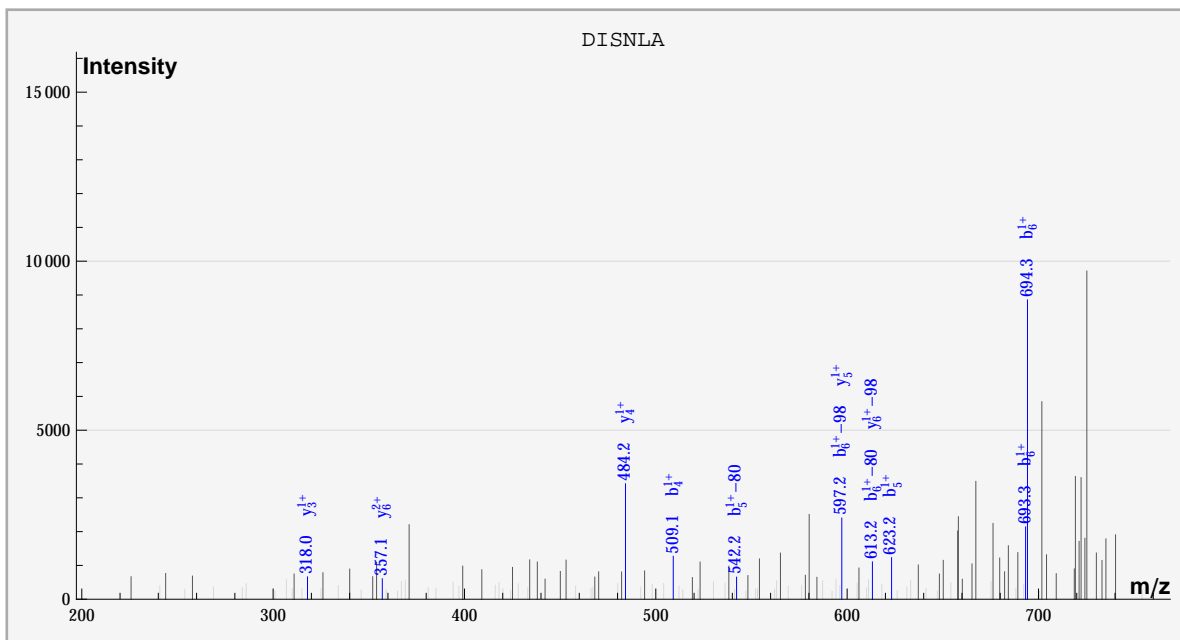

|   | # | b | b* | # | y | y* | P | P* |
|---|---|---|----|---|---|----|---|----|
| D | 1 |   |    |   |   |    | ✓ | ✓  |
| I | 2 |   |    | 5 | ✓ |    |   |    |
| S | 3 |   |    | 4 | ✓ |    |   |    |
| N | 4 | ✓ |    | 3 | ✓ |    |   |    |
| L | 5 | ✓ | ✓  | 2 |   |    |   |    |
| A | 6 | ✓ | ✓  | 1 |   |    |   |    |

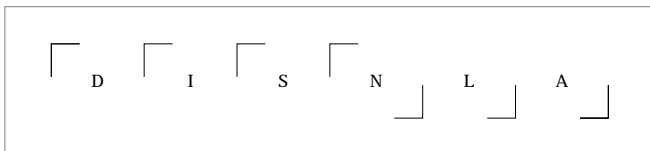

dbValid true DISNLA PHOS(1) 1. 714. -1.70872 5.29657 100. ? 2580.  
 S\_Acido\_new%gi|68568442|gb|AAY81371.1| DISNLA%:::PHOS:::%sample\_0%cmpd\_1164

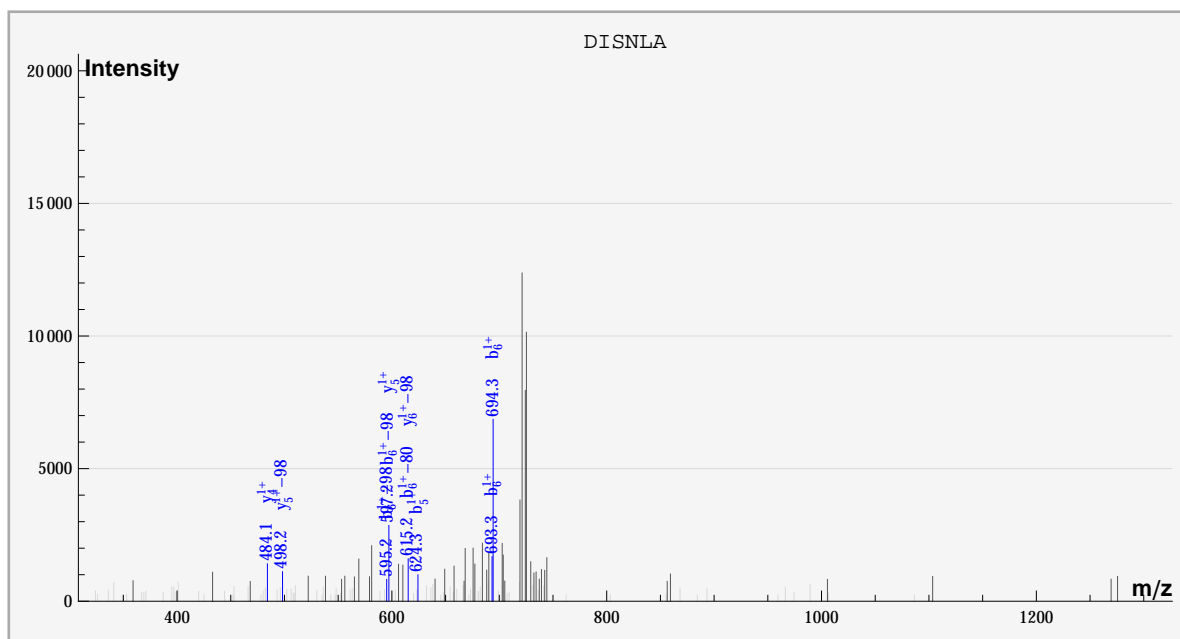

|   | # | b | b* | # | y | y* | P | P* |
|---|---|---|----|---|---|----|---|----|
| D | 1 |   |    |   |   |    |   | ✓  |
| I | 2 |   |    | 5 | ✓ | ✓  |   |    |
| S | 3 |   |    | 4 | ✓ |    |   |    |
| N | 4 |   |    | 3 |   |    |   |    |
| L | 5 | ✓ |    | 2 |   |    |   |    |
| A | 6 | ✓ | ✓  | 1 |   |    |   |    |

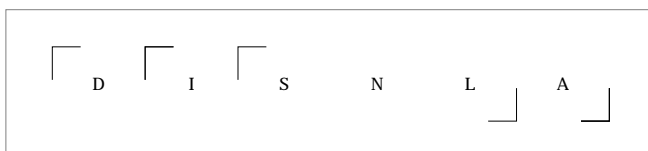

dbValid true DISNLA PHOS(1) 1. 714. -1.70872 5.66695 100. ? 2592.  
 S\_Acido\_new%gi|68568442|gb|AAY81371.1| DISNLA%:::PHOS:::%sample\_0%cmpd\_1174

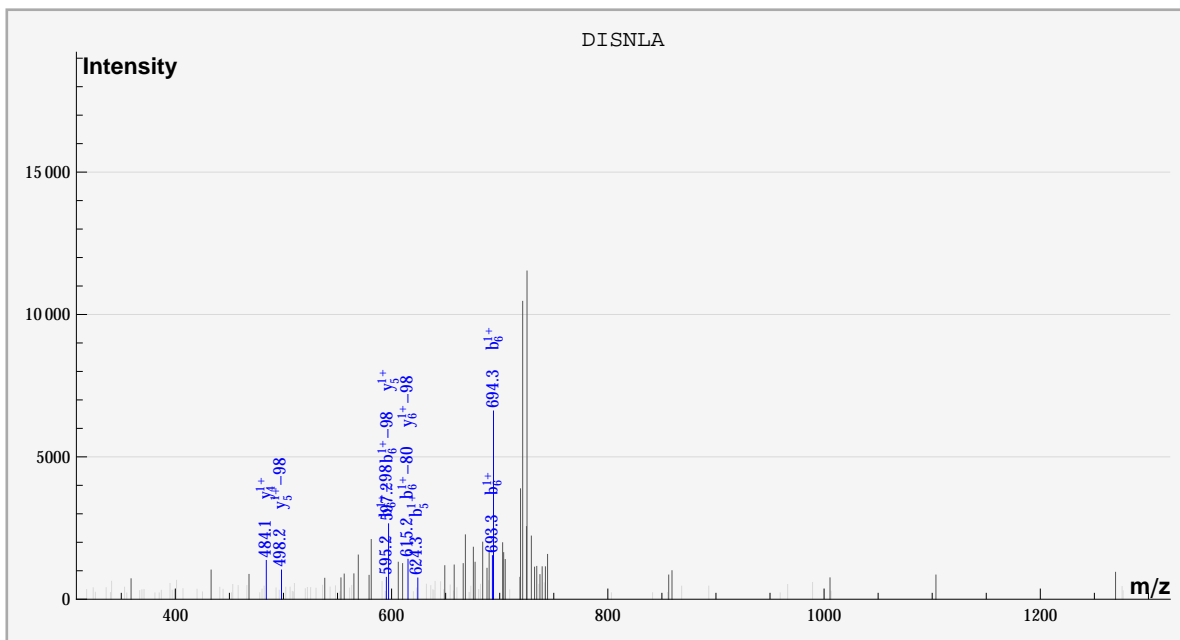

|   | # | b | b* | # | y | y* | P | P* |
|---|---|---|----|---|---|----|---|----|
| D | 1 |   |    |   |   |    |   | ✓  |
| I | 2 |   |    | 5 | ✓ | ✓  |   |    |
| S | 3 |   |    | 4 | ✓ |    |   |    |
| N | 4 |   |    | 3 |   |    |   |    |
| L | 5 | ✓ |    | 2 |   |    |   |    |
| A | 6 | ✓ | ✓  | 1 |   |    |   |    |

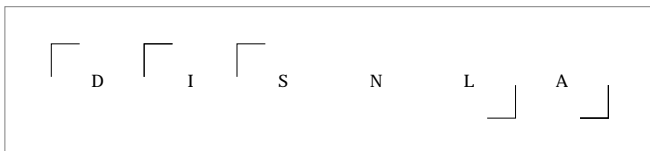

dbValid true DISNLA PHOS(1) 1. 714. -1.70872 5.07939 100. ? 2628.  
 S\_Acido\_new%gi|68568442|gb|AAY81371.1| DISNLA%:::PHOS:::%sample\_0%cmpd\_1205

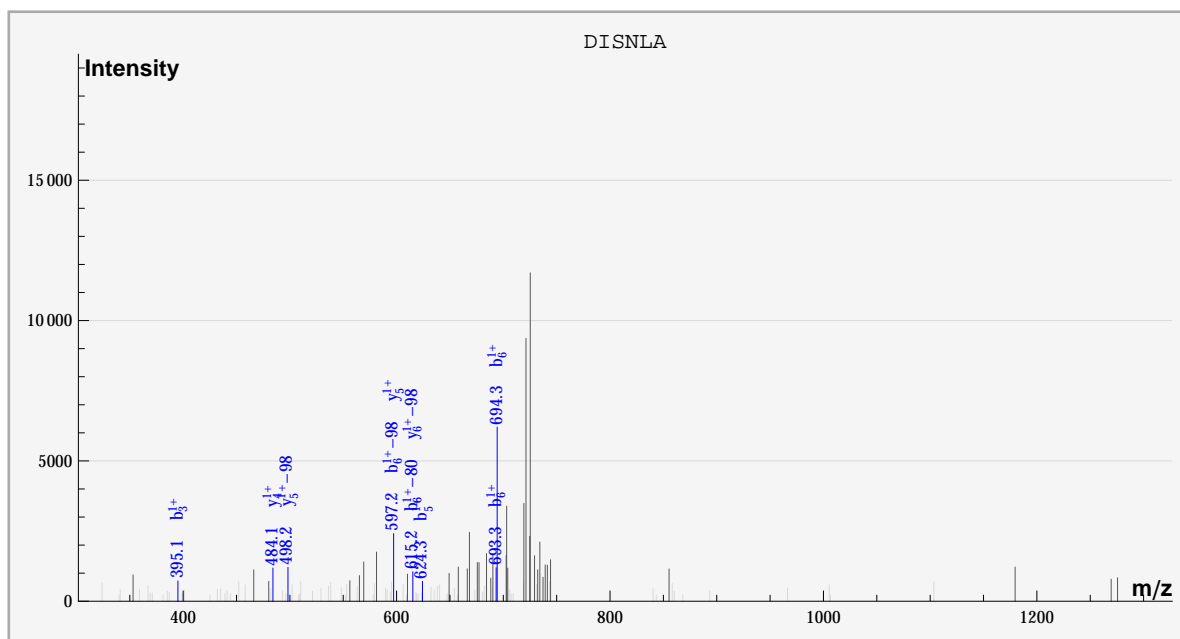

|   | # | b | b* | # | y | y* | P | P* |
|---|---|---|----|---|---|----|---|----|
| D | 1 |   |    |   |   |    |   | ✓  |
| I | 2 |   |    | 5 | ✓ | ✓  |   |    |
| S | 3 | ✓ |    | 4 | ✓ |    |   |    |
| N | 4 |   |    | 3 |   |    |   |    |
| L | 5 | ✓ |    | 2 |   |    |   |    |
| A | 6 | ✓ | ✓  | 1 |   |    |   |    |

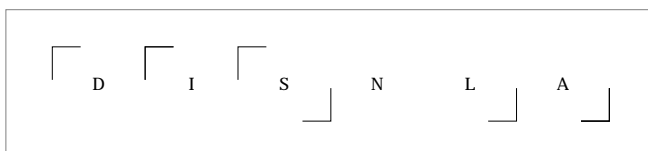

dbValid true DISNLA PHOS(1) 1. 714. -1.70872 5.09247 100. ? 2652.  
 S\_Acido\_new%gi|68568442|gb|AAY81371.1| DISNLA%:::PHOS:::%sample\_0%cmpd\_1225

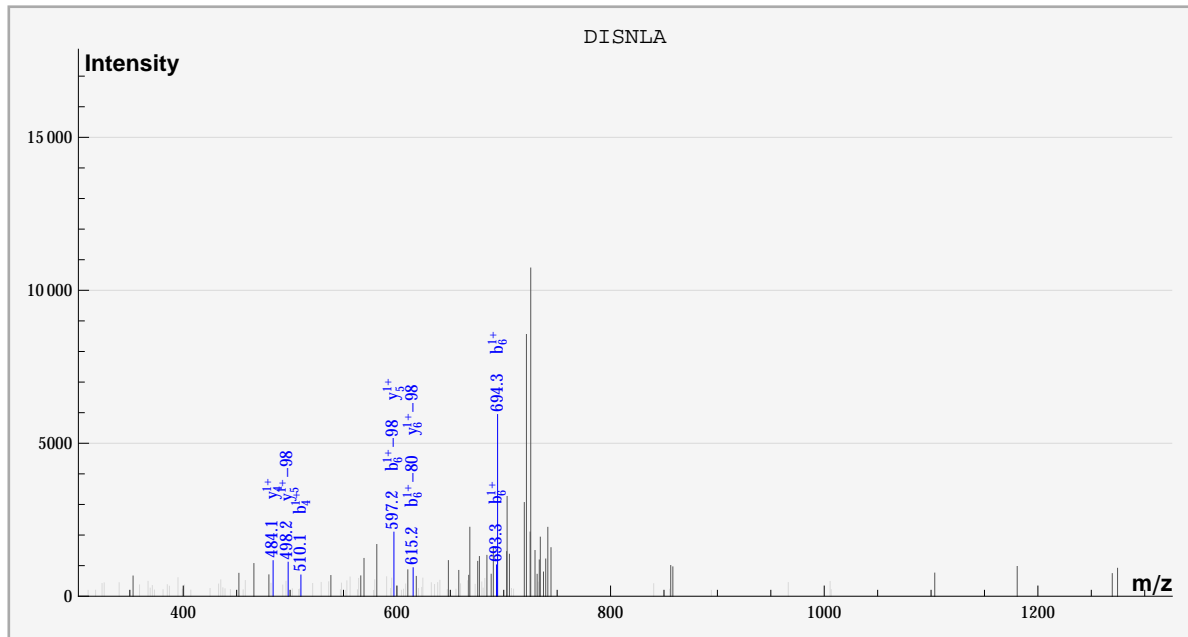

|   | # | b | b* | # | y | y* | P | P* |
|---|---|---|----|---|---|----|---|----|
| D | 1 |   |    |   |   |    |   | ✓  |
| I | 2 |   |    | 5 | ✓ | ✓  |   |    |
| S | 3 |   |    | 4 | ✓ |    |   |    |
| N | 4 | ✓ |    | 3 |   |    |   |    |
| L | 5 |   |    | 2 |   |    |   |    |
| A | 6 | ✓ | ✓  | 1 |   |    |   |    |

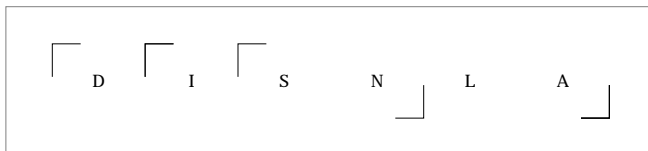

dbValid true VDDGASK PHOS(1) 1. 715. -1.71348 5.09513 100. ? 2190.  
 S\_Acido\_new%gi|68568400|gb|AAY81329.1| VDDGASK%:::::PHOS::%sample\_0%compd\_825

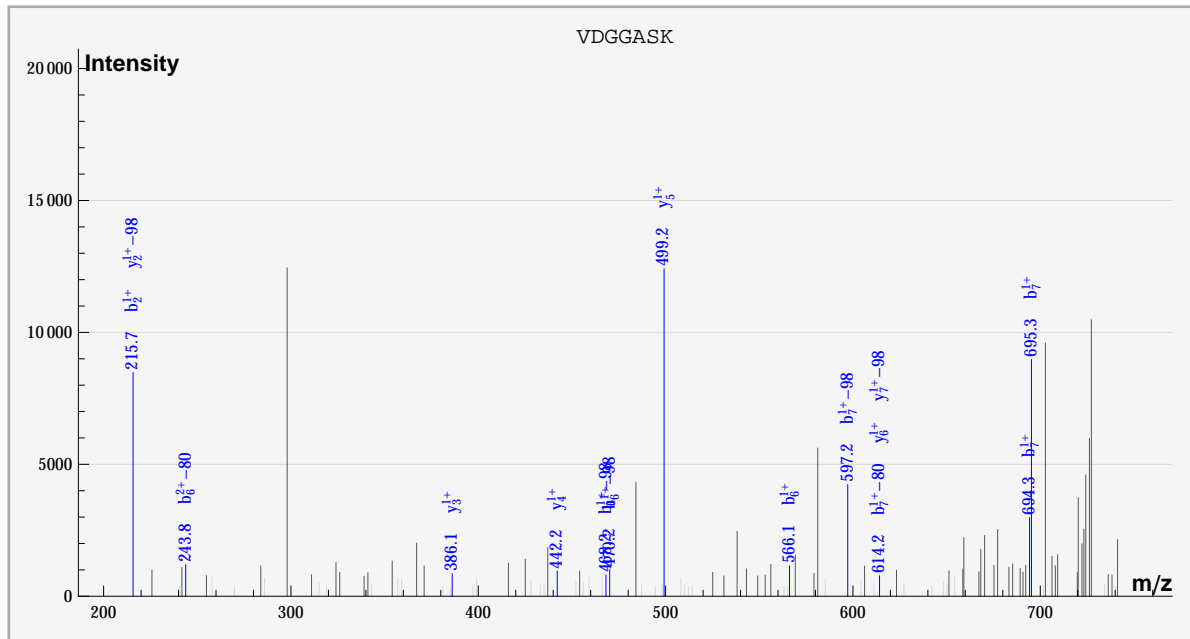

|   | # | b | b* | # | y | y* | P | P* |
|---|---|---|----|---|---|----|---|----|
| V | 1 |   |    |   |   |    |   | ✓  |
| D | 2 | ✓ |    | 6 | ✓ |    |   |    |
| G | 3 |   |    | 5 | ✓ |    |   |    |
| G | 4 |   |    | 4 | ✓ |    |   |    |
| A | 5 |   |    | 3 | ✓ |    |   |    |
| S | 6 | ✓ | ✓  | 2 |   | ✓  |   |    |
| K | 7 | ✓ | ✓  | 1 |   |    |   |    |

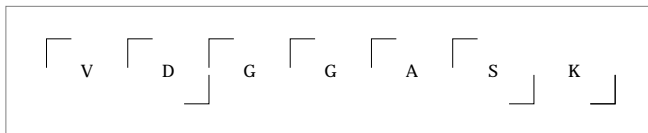



dbValid true YMTRAFGRSTR PHOS(1) 2. 715. -1.67352 5.05793 100. ? 2214.  
 S\_Acido\_new%gi|68567055|gb|AA79984.1| YMTRAFGRSTR%:PHOS:.....:sample\_3%compd\_882

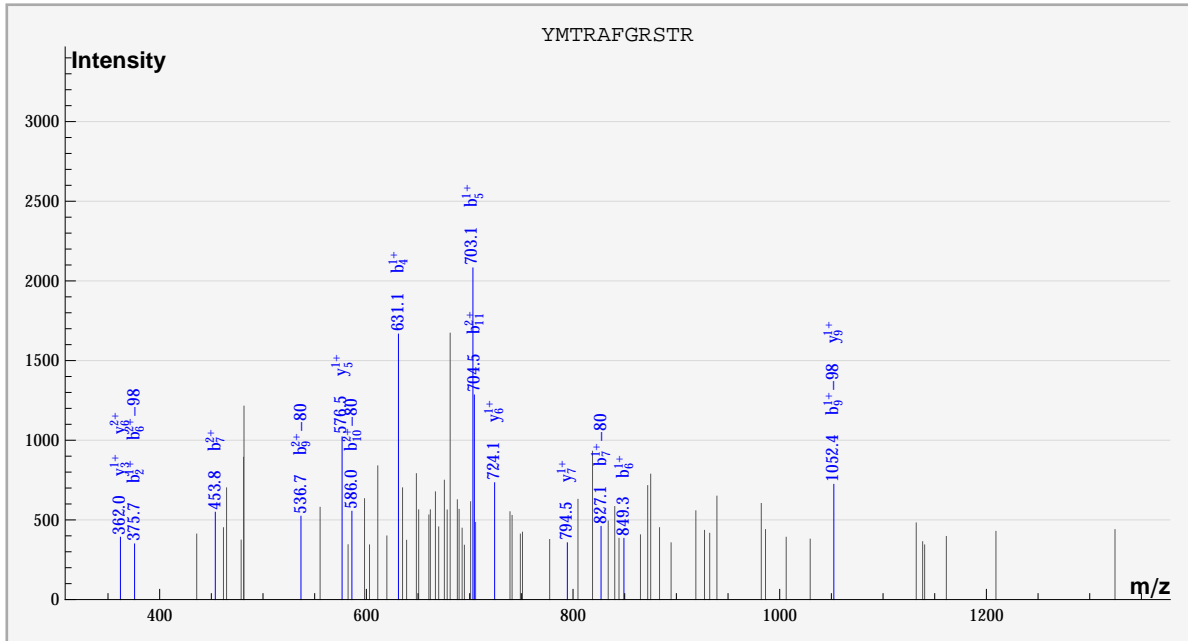

|   | #  | b | b* | #  | y | y* | P | P* |
|---|----|---|----|----|---|----|---|----|
| Y | 1  |   |    |    |   |    |   |    |
| M | 2  | ✓ |    | 10 |   |    |   |    |
| T | 3  |   |    | 9  | ✓ |    |   |    |
| R | 4  | ✓ |    | 8  |   |    |   |    |
| A | 5  | ✓ |    | 7  | ✓ |    |   |    |
| F | 6  | ✓ | ✓  | 6  | ✓ |    |   |    |
| G | 7  | ✓ | ✓  | 5  | ✓ |    |   |    |
| R | 8  |   |    | 4  |   |    |   |    |
| S | 9  |   | ✓  | 3  | ✓ |    |   |    |
| T | 10 |   | ✓  | 2  |   |    |   |    |
| R | 11 | ✓ |    | 1  |   |    |   |    |

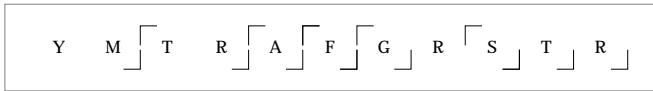

dbValid true VYEAIVSIESR PHOS(2) 2. 715. -1.69327 5.94136 100. ? 2262.  
 S\_Acido\_new%gi|68568539|gb|AAy81468.1| VYEAIVSIESR%::PHOS:::PHOS::%sample\_3%compd\_926

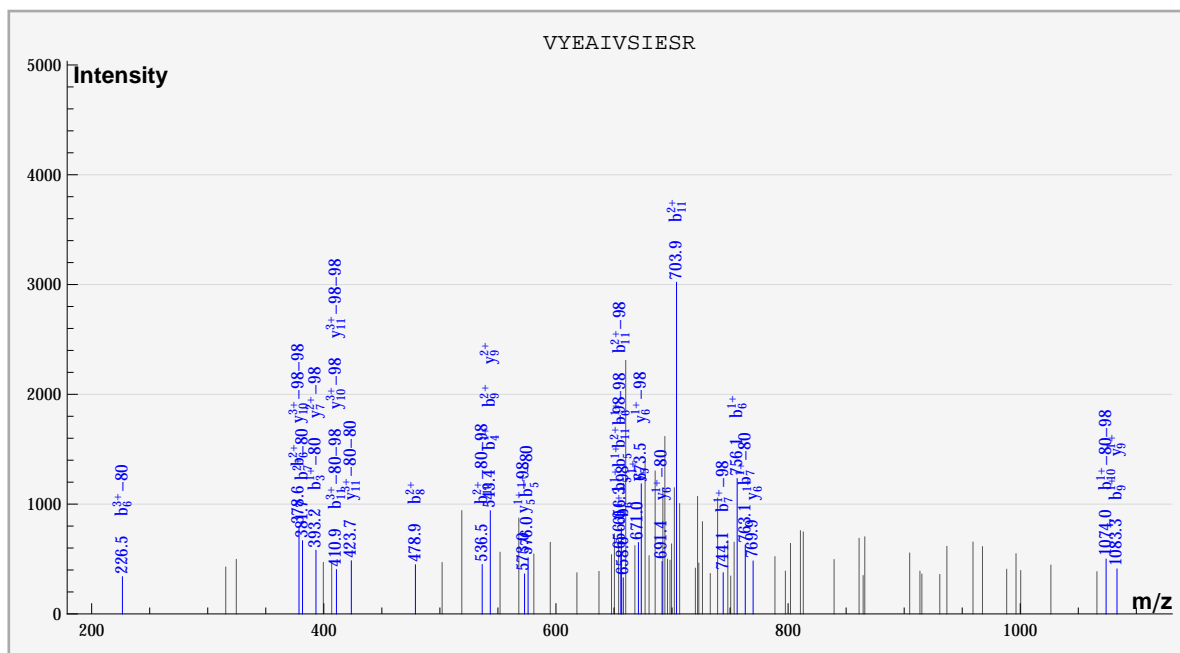

|   | #  | b | b* | #  | y | y* | P | P* |
|---|----|---|----|----|---|----|---|----|
| V | 1  |   |    |    |   |    |   | ✓  |
| Y | 2  |   |    | 10 |   | ✓  |   |    |
| E | 3  |   | ✓  | 9  |   | ✓  |   |    |
| A | 4  | ✓ |    | 8  |   |    |   |    |
| I | 5  | ✓ | ✓  | 7  |   | ✓  |   |    |
| V | 6  | ✓ | ✓  | 6  |   | ✓  | ✓ |    |
| S | 7  | ✓ |    | 5  |   | ✓  | ✓ |    |
| I | 8  | ✓ |    | 4  |   |    |   |    |
| E | 9  | ✓ |    | 3  |   |    |   |    |
| S | 10 |   | ✓  | 2  |   |    |   |    |
| R | 11 | ✓ | ✓  | 1  |   |    |   |    |

V Y E A I V S I E S R

dbValid true SGVILLIEMKSR PHOS(1) 2. 715. -1.61962 5.41317 100. ? 4002.

S\_Acido\_new%gi|68567942|gb|AA80871.1| SGVILLIEMKSR%.....PHOS::%sample\_0%cmpd\_2371

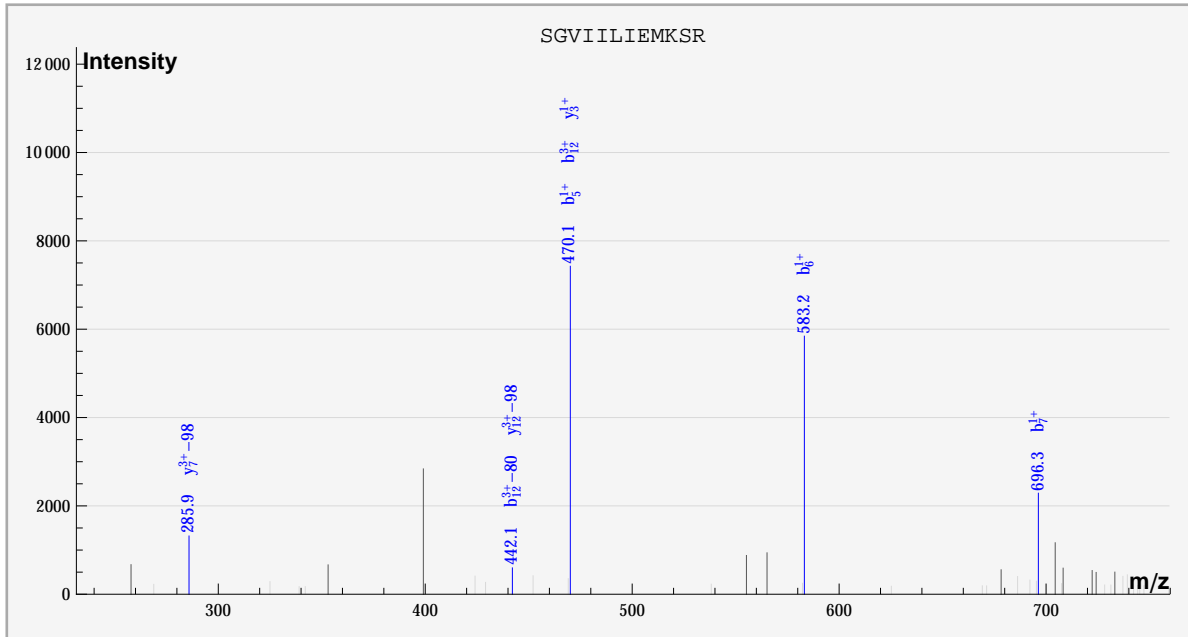

|   | #  | b | b* | #  | y | y* | P | P* |
|---|----|---|----|----|---|----|---|----|
| S | 1  |   |    |    |   |    |   | ✓  |
| G | 2  |   |    | 11 |   |    |   |    |
| V | 3  |   |    | 10 |   |    |   |    |
| I | 4  |   |    | 9  |   |    |   |    |
| I | 5  | ✓ |    | 8  |   |    |   |    |
| L | 6  | ✓ |    | 7  |   | ✓  |   |    |
| I | 7  | ✓ |    | 6  |   |    |   |    |
| E | 8  |   |    | 5  |   |    |   |    |
| M | 9  |   |    | 4  |   |    |   |    |
| K | 10 |   |    | 3  |   | ✓  |   |    |
| S | 11 |   |    | 2  |   |    |   |    |
| R | 12 | ✓ | ✓  | 1  |   |    |   |    |

「 S G V I I 」 「 L 」 「 I 」 E M 「 K S R 」

dbValid true RMKLMGLINTR Oxidation\_M(1),PHOS(1) 2. 716. -1.13563 5.04113 100. ? 2106.  
 S\_Acido\_new%gil68567337|gb|AAy80266.1| RMKLMGLINTR:::Oxidation\_M:::PHOS:::sample\_3%compd\_784

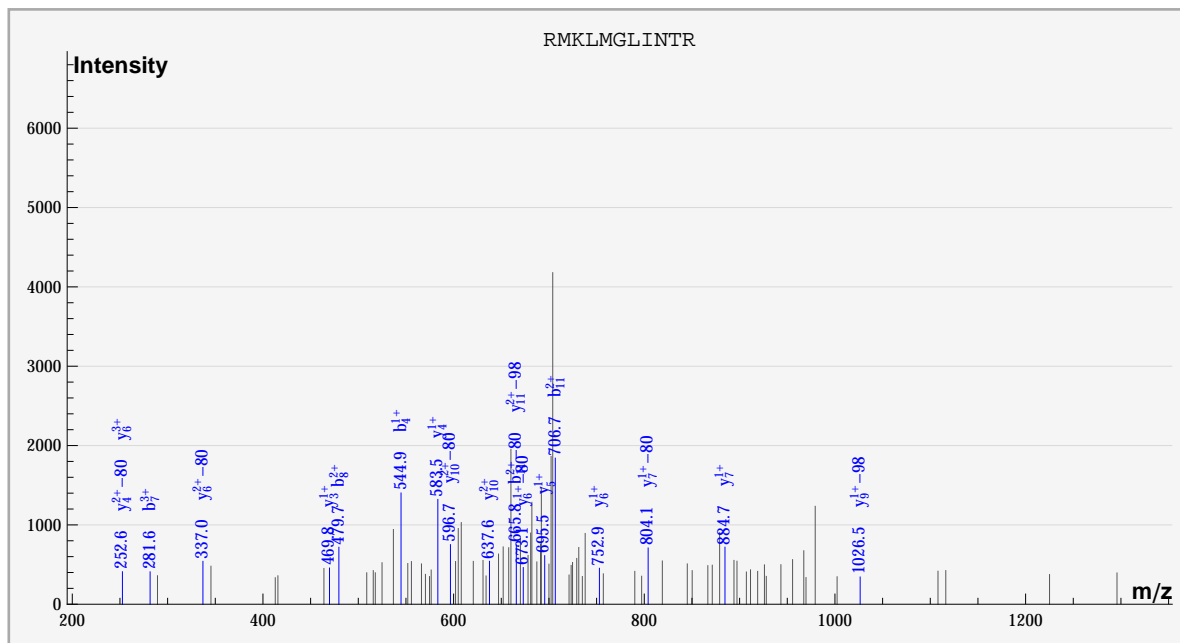

|   | #  | b | b* | #  | y | y* | P | P* |
|---|----|---|----|----|---|----|---|----|
| R | 1  |   |    |    |   |    |   | ✓  |
| M | 2  |   |    | 10 | ✓ | ✓  |   |    |
| K | 3  |   |    | 9  |   | ✓  |   |    |
| L | 4  | ✓ |    | 8  |   |    |   |    |
| M | 5  |   |    | 7  | ✓ | ✓  |   |    |
| G | 6  |   |    | 6  | ✓ | ✓  |   |    |
| L | 7  | ✓ |    | 5  | ✓ |    |   |    |
| I | 8  | ✓ |    | 4  | ✓ | ✓  |   |    |
| N | 9  |   |    | 3  | ✓ |    |   |    |
| T | 10 |   |    | 2  |   |    |   |    |
| R | 11 | ✓ | ✓  | 1  |   |    |   |    |

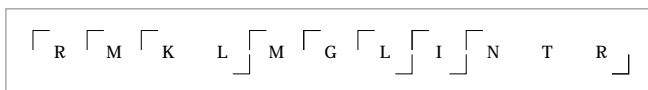

dbValid true RMKLMGLINTR Oxidation\_M(1),PHOS(1) 2. 716. -1.13563 5.10727 100. ? 2532.  
 S\_Acido\_new%gil68567337|gb|AAy80266.1| RMKLMGLINTR%:::::Oxidation\_M:::::PHOS::%sample\_0%compd\_1125

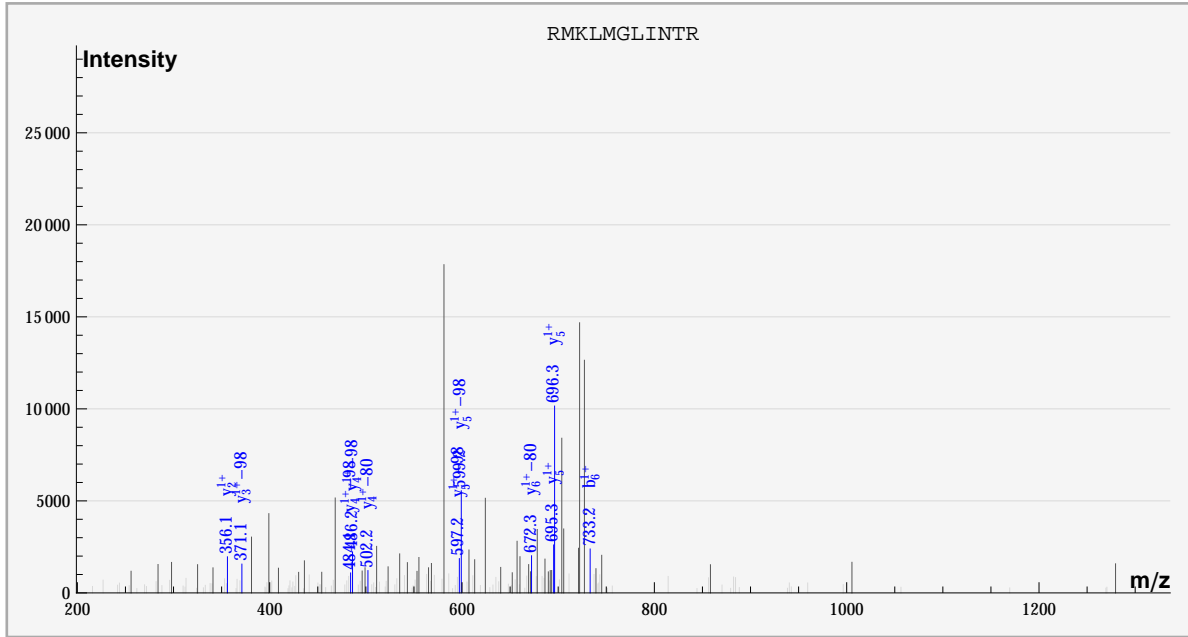

|   | #  | b | b* | #  | y | y* | P | P* |
|---|----|---|----|----|---|----|---|----|
| R | 1  |   |    |    |   |    |   |    |
| M | 2  |   |    | 10 |   |    |   |    |
| K | 3  |   |    | 9  |   |    |   |    |
| L | 4  |   |    | 8  |   |    |   |    |
| M | 5  |   |    | 7  |   |    |   |    |
| G | 6  | ✓ |    | 6  |   | ✓  |   |    |
| L | 7  |   |    | 5  | ✓ | ✓  |   |    |
| I | 8  |   |    | 4  |   | ✓  |   |    |
| N | 9  |   |    | 3  |   | ✓  |   |    |
| T | 10 |   |    | 2  | ✓ |    |   |    |
| R | 11 |   |    | 1  |   |    |   |    |

R M K L M G L I N T R

dbValid true RMKLMGLINTR Oxidation\_M(1),PHOS(1) 2. 716. -1.13563 5.36872 100. ? 3198.  
 S\_Acido\_new%gil68567337|gb|AAy80266.1| RMKLMGLINTR%:::Oxidation\_M:::::PHOS::%sample\_0%cmpd\_1693

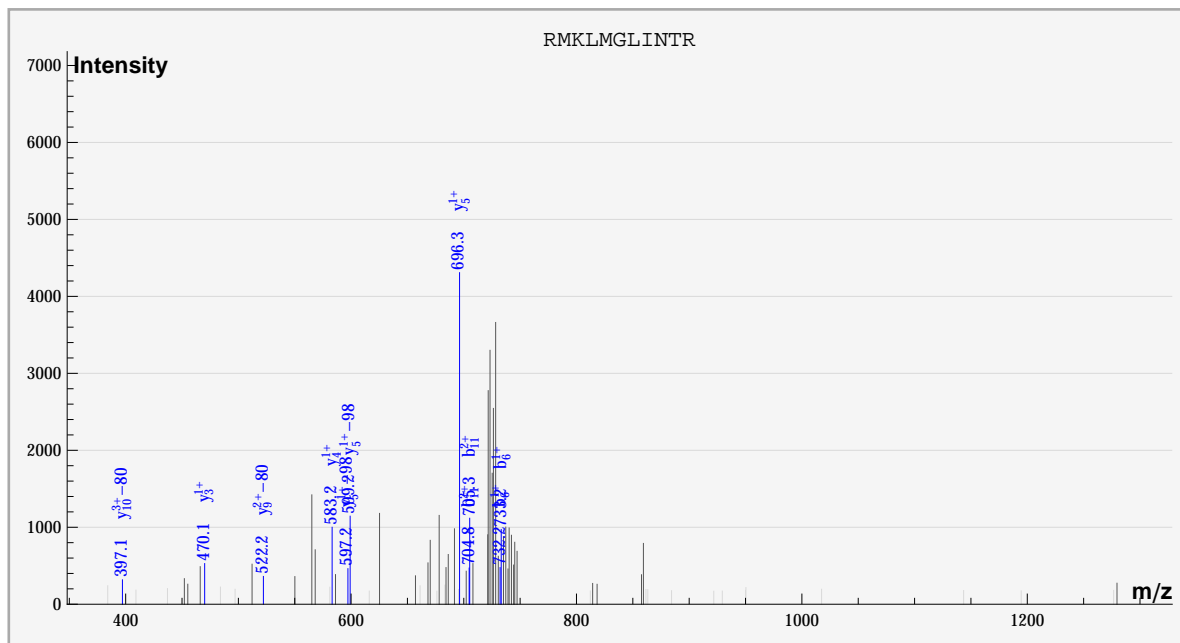

|   | #  | b | b* | #  | y | y* | P | P* |
|---|----|---|----|----|---|----|---|----|
| R | 1  |   |    |    |   |    |   |    |
| M | 2  |   |    | 10 |   | ✓  |   |    |
| K | 3  |   |    | 9  |   | ✓  |   |    |
| L | 4  |   |    | 8  |   |    |   |    |
| M | 5  |   |    | 7  |   |    |   |    |
| G | 6  | ✓ |    | 6  |   |    |   |    |
| L | 7  |   |    | 5  | ✓ | ✓  |   |    |
| I | 8  |   |    | 4  | ✓ |    |   |    |
| N | 9  |   |    | 3  | ✓ |    |   |    |
| T | 10 |   |    | 2  |   |    |   |    |
| R | 11 | ✓ |    | 1  |   |    |   |    |

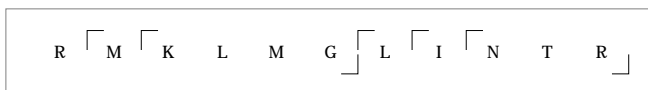

dbValid true RMKLMGLINTR Oxidation\_M(1),PHOS(1) 2. 716. -1.13563 5.68695 100. ? 3288.  
 S\_Acido\_new%gil68567337|gb|AAY80266.1| RMKLMGLINTR%:::Oxidation\_M:::::PHOS::%sample\_0%cmpd\_1767

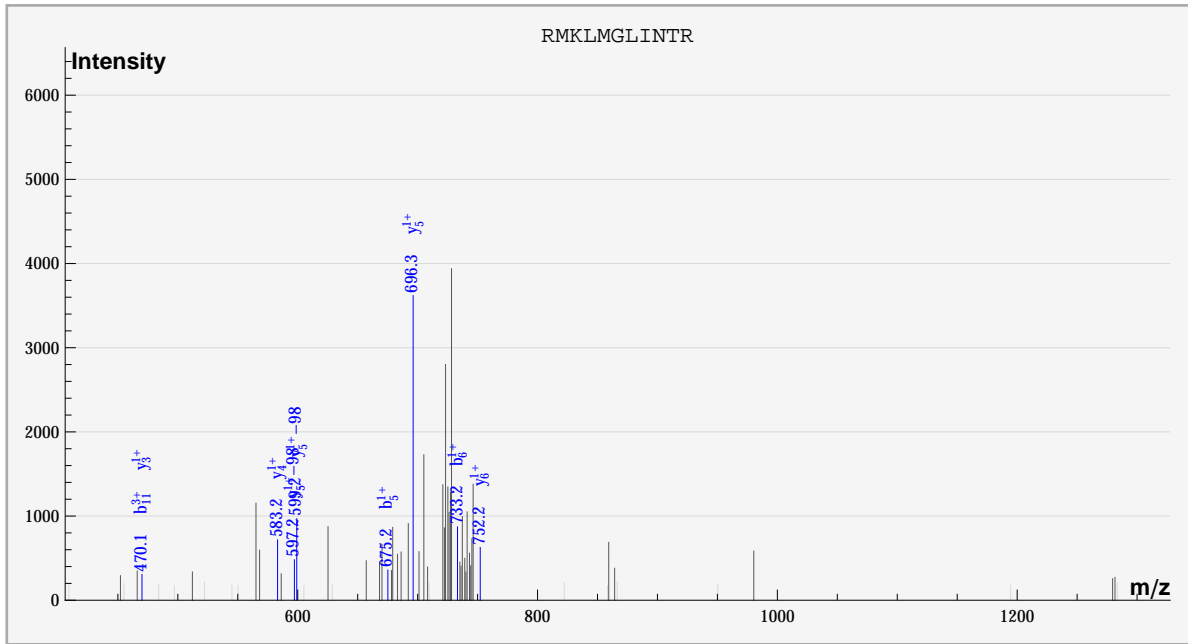

|   | #  | b | b* | #  | y | y* | P | P* |
|---|----|---|----|----|---|----|---|----|
| R | 1  |   |    |    |   |    |   |    |
| M | 2  |   |    | 10 |   |    |   |    |
| K | 3  |   |    | 9  |   |    |   |    |
| L | 4  |   |    | 8  |   |    |   |    |
| M | 5  | ✓ |    | 7  |   |    |   |    |
| G | 6  | ✓ |    | 6  | ✓ |    |   |    |
| L | 7  |   |    | 5  | ✓ | ✓  |   |    |
| I | 8  |   |    | 4  | ✓ |    |   |    |
| N | 9  |   |    | 3  | ✓ |    |   |    |
| T | 10 |   |    | 2  |   |    |   |    |
| R | 11 | ✓ |    | 1  |   |    |   |    |

R M K L M G L I N T R

dbValid true DVSDAK PHOS(1) 1. 716. -1.72946 5.44583 100. ? 3486.  
 S\_Acido\_new%gi|68567940|gb|AAY80869.1| DVSDAK%:::PHOS:::%sample\_3%compd\_2045

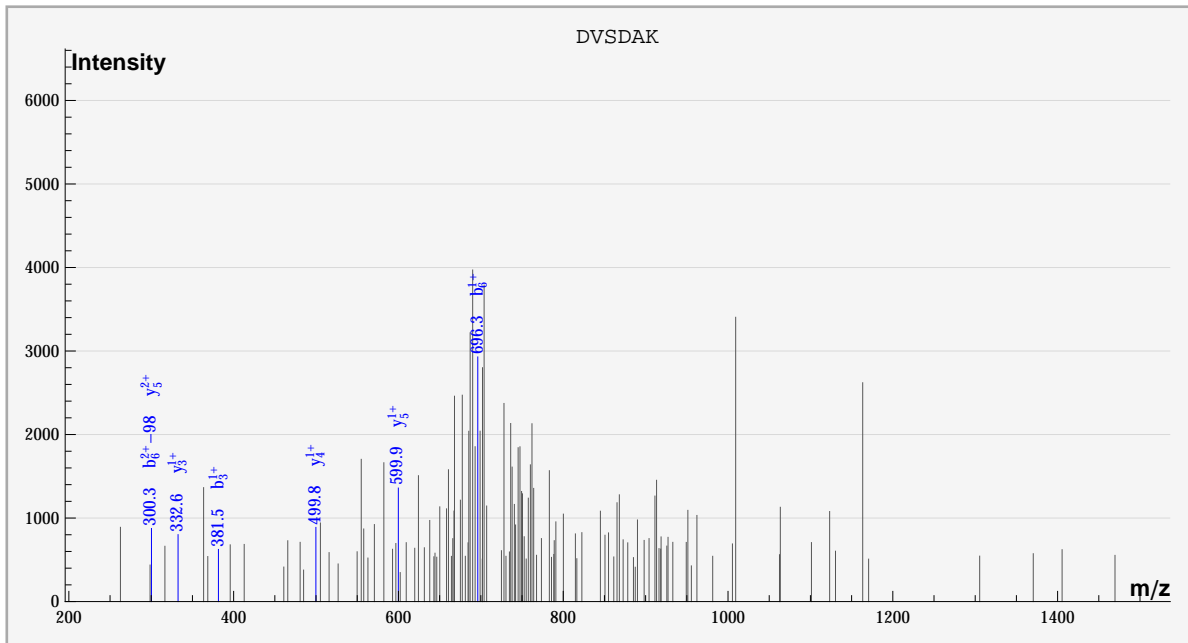

|   | # | b | b* | # | y | y* | P | P* |
|---|---|---|----|---|---|----|---|----|
| D | 1 |   |    |   |   |    |   |    |
| V | 2 |   |    | 5 |   | ✓  |   |    |
| S | 3 | ✓ |    | 4 |   | ✓  |   |    |
| D | 4 |   |    | 3 |   | ✓  |   |    |
| A | 5 |   |    | 2 |   |    |   |    |
| K | 6 | ✓ | ✓  | 1 |   |    |   |    |

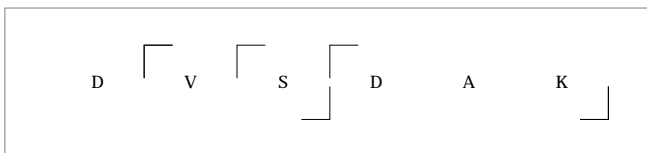



dbValid true IFSVGI PHOS(1) 1. 717. -1.65742 5.28445 100. ? 3090.

S\_Acido\_new%gi|68567569|gb|AAY80498.1| IFSVGI%:::PHOS:::%sample\_0%compd\_1600

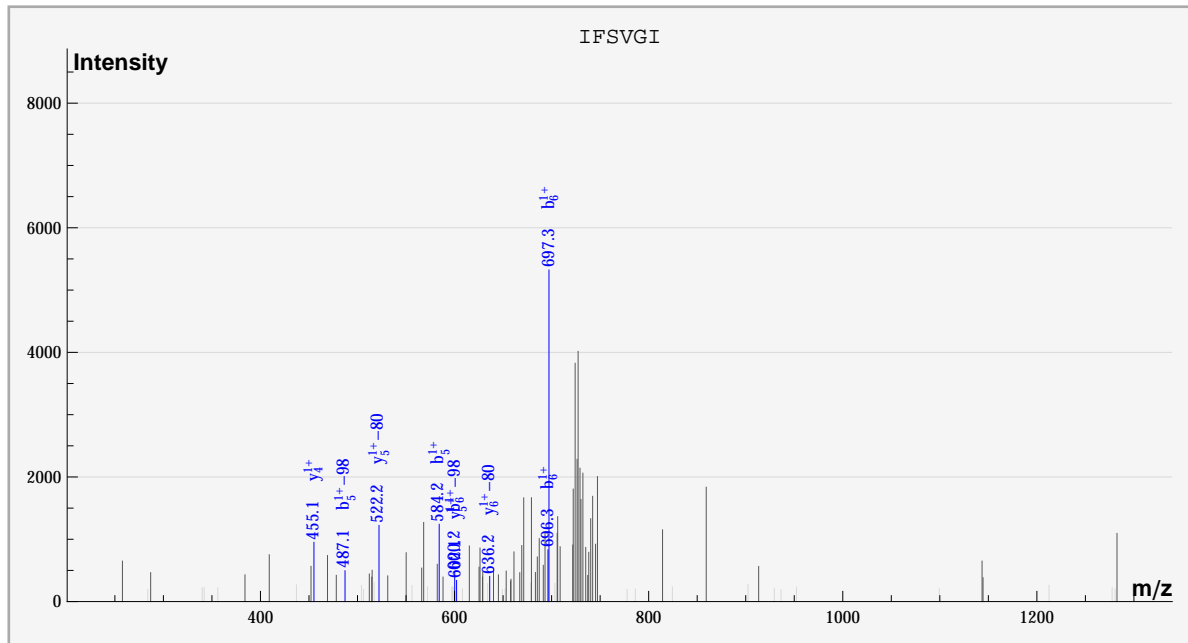

|   | # | b | b* | # | y | y* | P | P* |
|---|---|---|----|---|---|----|---|----|
| I | 1 |   |    |   |   |    |   | ✓  |
| F | 2 |   |    | 5 | ✓ | ✓  |   |    |
| S | 3 |   |    | 4 | ✓ |    |   |    |
| V | 4 |   |    | 3 |   |    |   |    |
| G | 5 | ✓ | ✓  | 2 |   |    |   |    |
| I | 6 | ✓ | ✓  | 1 |   |    |   |    |

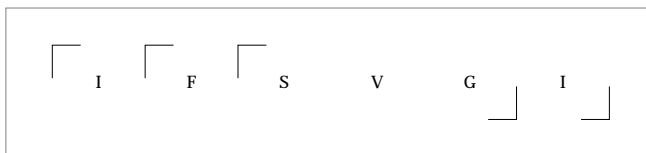

dbValid true IFSVGI PHOS(1) 1. 717. -1.65742 5.17123 100. ? 3756.  
 S\_Acido\_new%gi|68567569|gb|AAY80498.1| IFSVGI%:::PHOS:::%sample\_3%compd\_2290

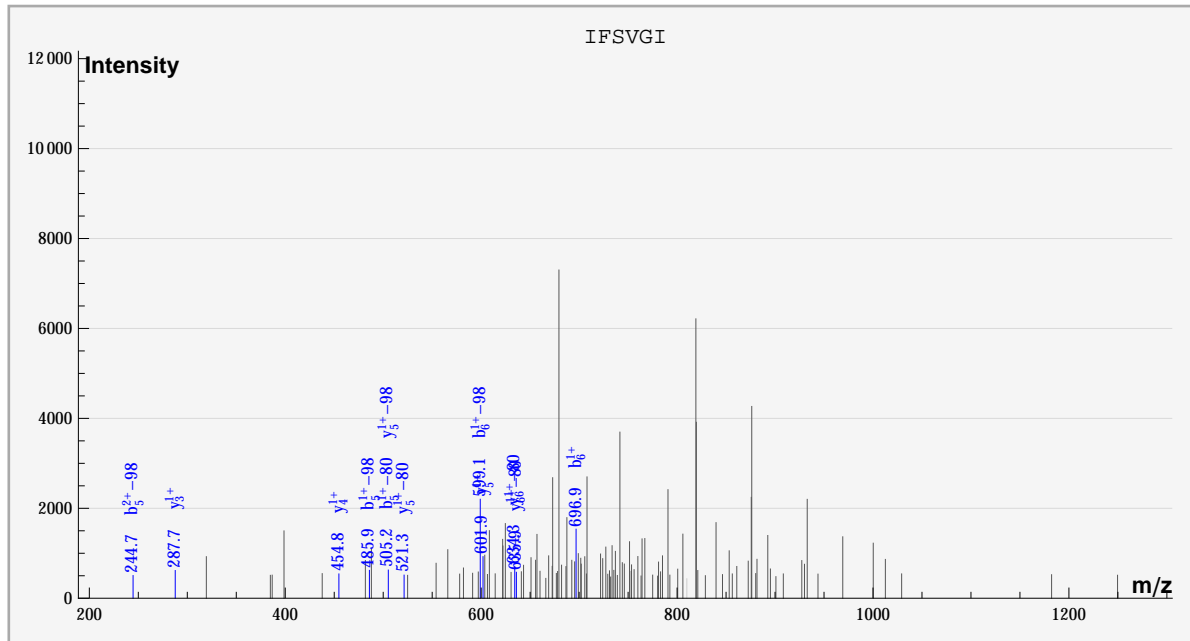

|   | # | b | b* | # | y | y* | P | P* |
|---|---|---|----|---|---|----|---|----|
| I | 1 |   |    |   |   |    |   | ✓  |
| F | 2 |   |    | 5 | ✓ | ✓  |   |    |
| S | 3 |   |    | 4 | ✓ |    |   |    |
| V | 4 |   |    | 3 | ✓ |    |   |    |
| G | 5 |   | ✓  | 2 |   |    |   |    |
| I | 6 | ✓ | ✓  | 1 |   |    |   |    |

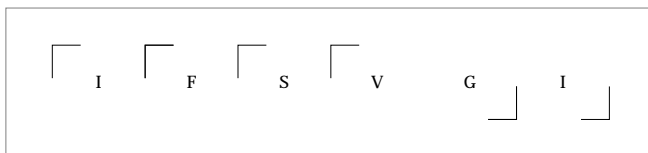

dbValid true VYYIAELCDK Cys\_CAM(1),PHOS(2) 2. 718. -0.723413 5.0751 100. ? 1356.  
 S\_Acido\_new%gil68568248|gb|AAy81177.1| VYYIAELCDK%::PHOS:PHOS::::Cys\_CAM:::sample\_0%compd\_108

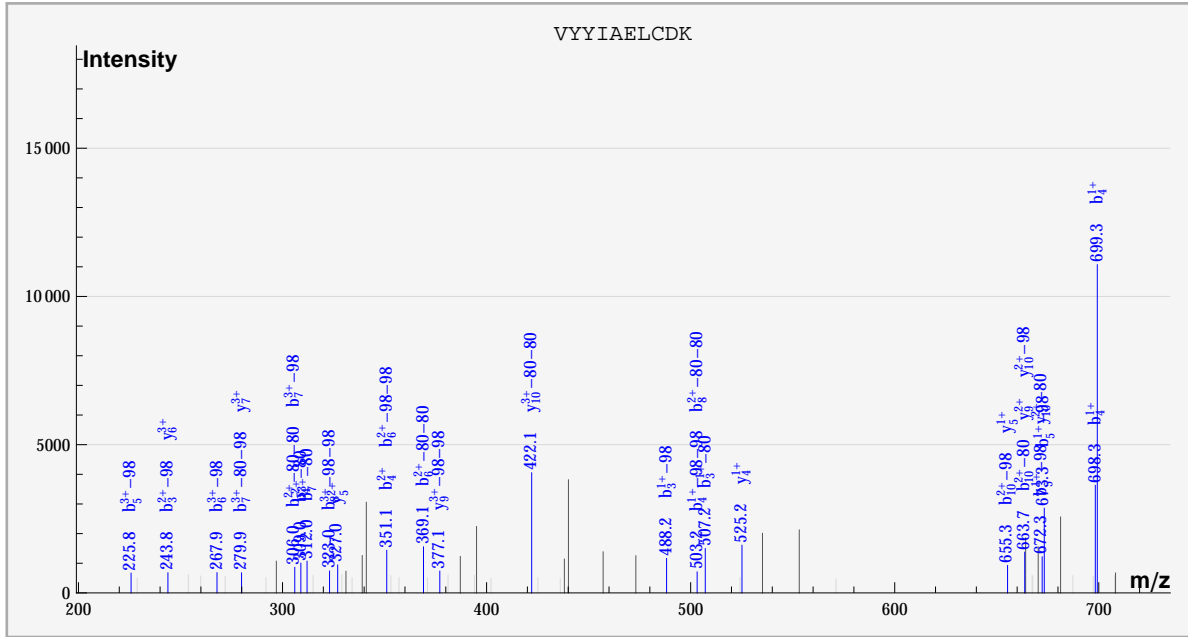

|   | #  | b | b* | # | y | y* | P | P* |
|---|----|---|----|---|---|----|---|----|
| V | 1  |   |    |   |   |    |   | ✓  |
| Y | 2  |   |    | 9 | ✓ | ✓  |   |    |
| Y | 3  |   | ✓  | 8 |   |    |   |    |
| I | 4  | ✓ | ✓  | 7 | ✓ |    |   |    |
| A | 5  |   | ✓  | 6 | ✓ |    |   |    |
| E | 6  |   | ✓  | 5 | ✓ |    |   |    |
| L | 7  |   | ✓  | 4 | ✓ |    |   |    |
| C | 8  |   | ✓  | 3 |   |    |   |    |
| D | 9  |   |    | 2 |   |    |   |    |
| K | 10 |   | ✓  | 1 |   |    |   |    |

V Y Y I A E L C D K

dbValid true MYETIKLETK Oxidation\_M(1),PHOS(2) 2. 718. -1.70248 5.03974 100. ? 1542.  
 S\_Acido\_new%gil68568643|gb|AAY81572.1| MYETIKLETK%:Oxidation\_M::PHOS:::PHOS::%sample\_0%compd\_265

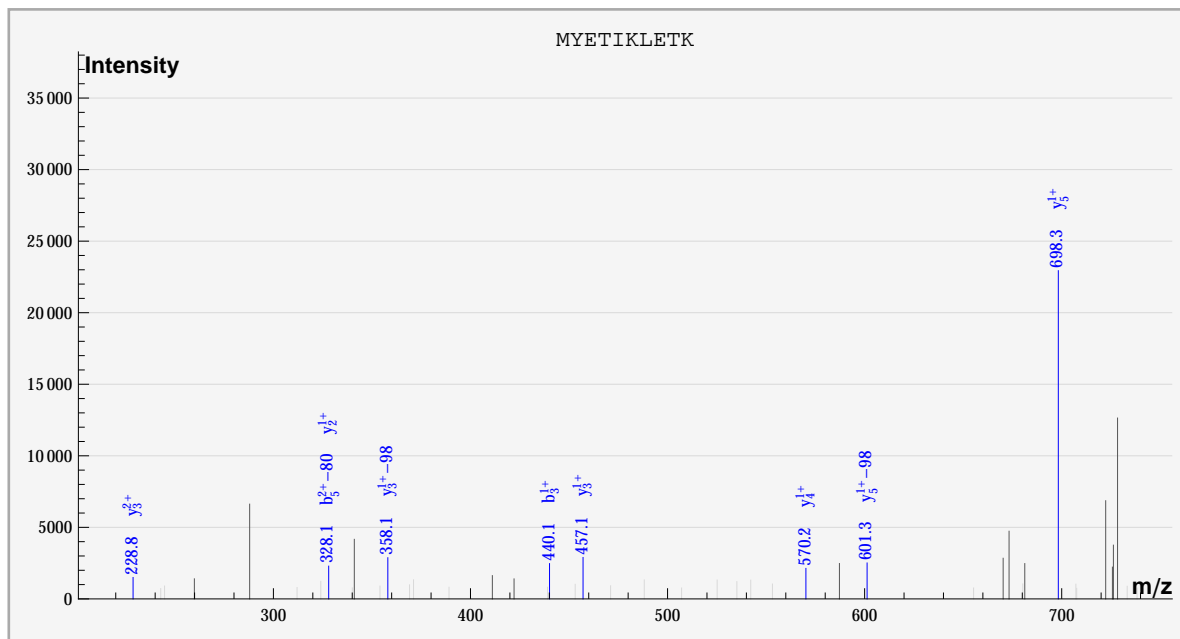

|   | #  | b | b* | # | y | y* | P | P* |
|---|----|---|----|---|---|----|---|----|
| M | 1  |   |    |   |   |    |   |    |
| Y | 2  |   |    | 9 |   |    |   |    |
| E | 3  | ✓ |    | 8 |   |    |   |    |
| T | 4  |   |    | 7 |   |    |   |    |
| I | 5  |   | ✓  | 6 |   |    |   |    |
| K | 6  |   |    | 5 | ✓ | ✓  |   |    |
| L | 7  |   |    | 4 | ✓ |    |   |    |
| E | 8  |   |    | 3 | ✓ | ✓  |   |    |
| T | 9  |   |    | 2 | ✓ |    |   |    |
| K | 10 |   |    | 1 |   |    |   |    |

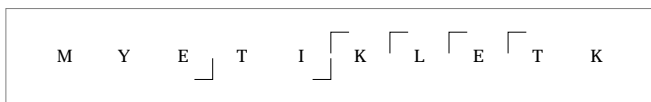

dbValid true LRKYVAFTTTR PHOS(1) 2. 718. 0.376487 5.17428 100. ? 2820.  
 S\_Acido\_new%gi|68566708|gb|AA79637.1| LRKYVAFTTTR%:::PHOS:::sample\_3%compd\_1439

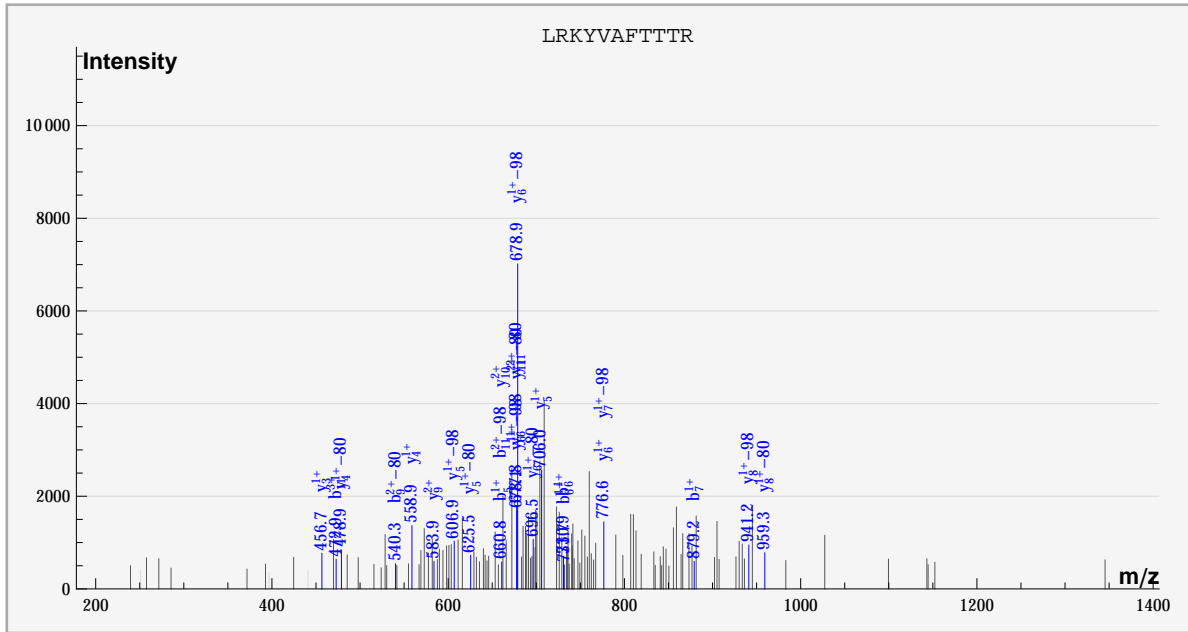

|   | #  | b | b* | #  | y | y* | P | P* |
|---|----|---|----|----|---|----|---|----|
| L | 1  |   |    |    |   |    |   | ✓  |
| R | 2  |   |    | 10 | ✓ |    |   |    |
| K | 3  |   |    | 9  | ✓ |    |   |    |
| Y | 4  |   |    | 8  |   | ✓  |   |    |
| V | 5  | ✓ |    | 7  |   | ✓  |   |    |
| A | 6  | ✓ |    | 6  | ✓ | ✓  |   |    |
| F | 7  | ✓ |    | 5  | ✓ | ✓  |   |    |
| T | 8  |   |    | 4  | ✓ | ✓  |   |    |
| T | 9  |   | ✓  | 3  | ✓ |    |   |    |
| T | 10 |   |    | 2  |   |    |   |    |
| R | 11 | ✓ | ✓  | 1  |   |    |   |    |

LRKYVAFTTTR

dbValid true EFYYWTMR PHOS(3) 2. 718. 0.215142 5.5612 100. ? 5064.  
 S\_Acido\_new%gii68567662|gb|AAY80591.1| EFYYWTMR%:::PHOS:PHOS:PHOS:::sample\_3%compd\_3476

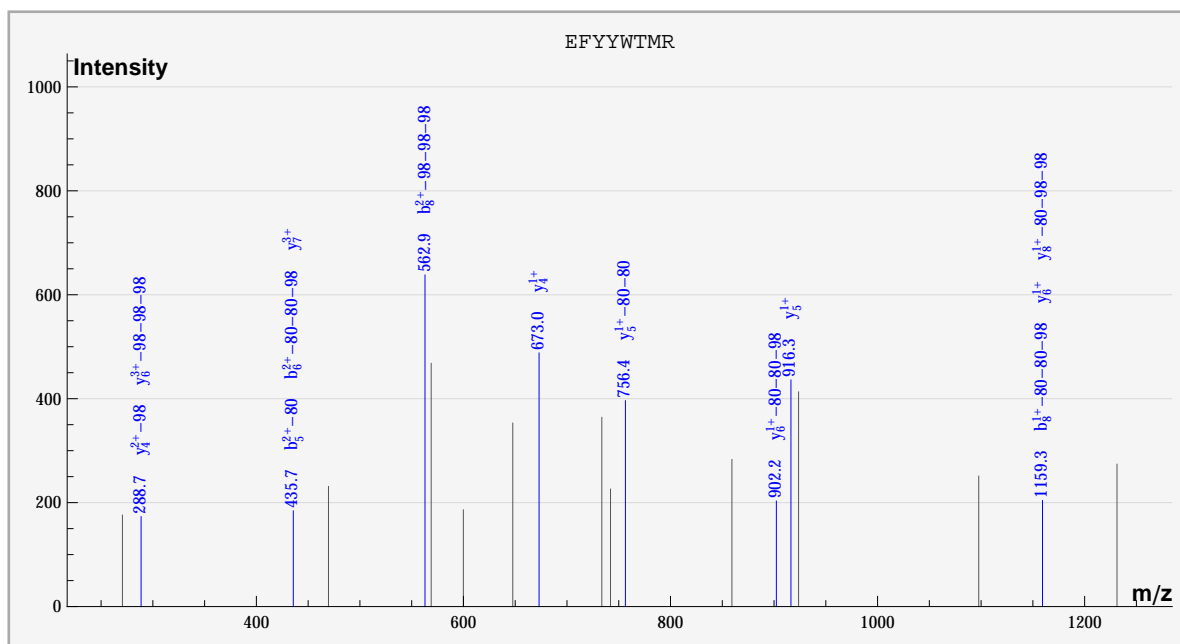

|   | # | b | b* | # | y | y* | P | P* |
|---|---|---|----|---|---|----|---|----|
| E | 1 |   |    |   |   |    |   | ✓  |
| F | 2 |   |    | 7 | ✓ |    |   |    |
| Y | 3 |   |    | 6 | ✓ | ✓  |   |    |
| Y | 4 |   |    | 5 | ✓ | ✓  |   |    |
| W | 5 | ✓ |    | 4 | ✓ | ✓  |   |    |
| T | 6 | ✓ |    | 3 |   |    |   |    |
| M | 7 |   |    | 2 |   |    |   |    |
| R | 8 | ✓ |    | 1 |   |    |   |    |

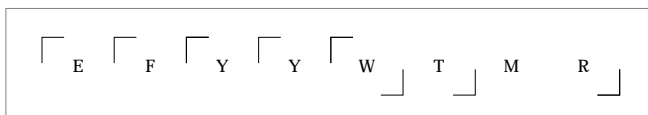

dbValid true YIETINSVKR PHOS(1) 2. 718.1 -1.75241 5.00377 100. ? 3570.

S\_Acido\_new%gi|68568048|gb|AA80977.1| YIETINSVKR%:PHOS:::sample\_1%compd\_2354

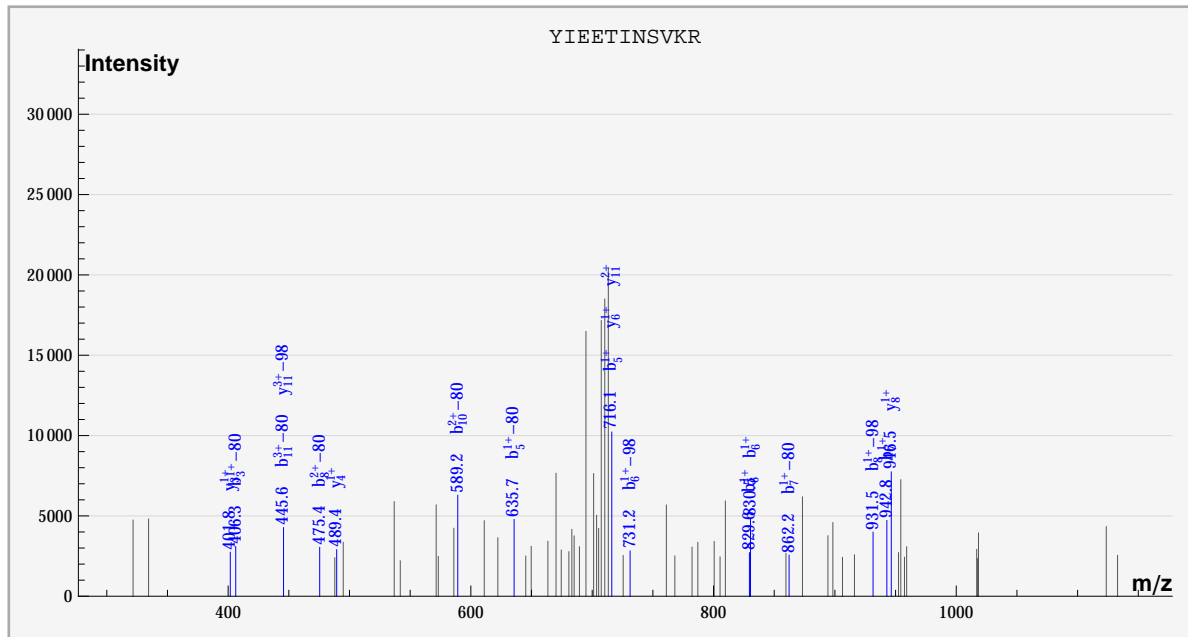

|   | #  | b | b* | #  | y | y* | P | P* |
|---|----|---|----|----|---|----|---|----|
| Y | 1  |   |    |    |   |    | ✓ | ✓  |
| I | 2  |   |    | 10 |   |    |   |    |
| E | 3  |   | ✓  | 9  |   |    |   |    |
| E | 4  |   |    | 8  | ✓ |    |   |    |
| T | 5  | ✓ | ✓  | 7  |   |    |   |    |
| I | 6  | ✓ | ✓  | 6  | ✓ |    |   |    |
| N | 7  | ✓ | ✓  | 5  |   |    |   |    |
| S | 8  |   | ✓  | 4  | ✓ |    |   |    |
| V | 9  |   |    | 3  | ✓ |    |   |    |
| K | 10 |   | ✓  | 2  |   |    |   |    |
| R | 11 |   | ✓  | 1  |   |    |   |    |

Y I E E T I N S V K R

dbValid true VYYIAELCDK Cys\_CAM(1),PHOS(2) 2. 719. -1.72341 5.39347 100. ? 2958.  
 S\_Acido\_new%gil68568248|gb|AA81177.1| VYYIAELCDK%::PHOS:PHOS::::Cys\_CAM:::sample\_0%compd\_1490

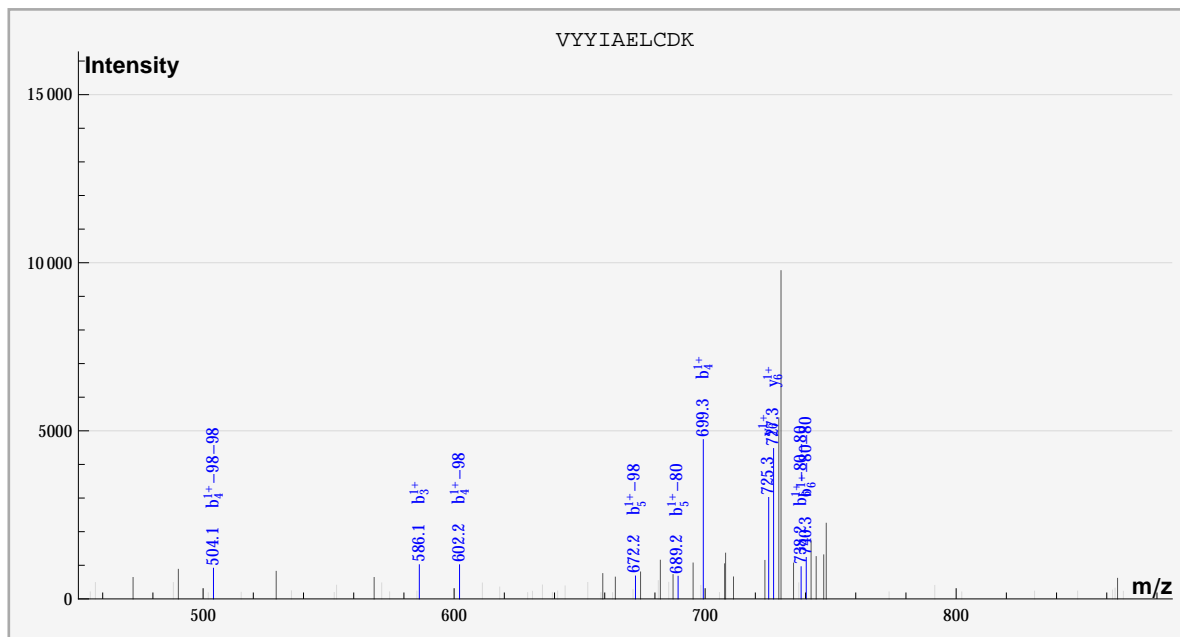

|   | #  | b | b* | # | y | y* | P | P* |
|---|----|---|----|---|---|----|---|----|
| V | 1  |   |    |   |   |    |   |    |
| Y | 2  |   |    | 9 |   |    |   |    |
| Y | 3  | ✓ |    | 8 |   |    |   |    |
| I | 4  | ✓ | ✓  | 7 |   |    |   |    |
| A | 5  |   | ✓  | 6 | ✓ |    |   |    |
| E | 6  |   | ✓  | 5 |   |    |   |    |
| L | 7  |   |    | 4 |   |    |   |    |
| C | 8  |   |    | 3 |   |    |   |    |
| D | 9  |   |    | 2 |   |    |   |    |
| K | 10 |   |    | 1 |   |    |   |    |

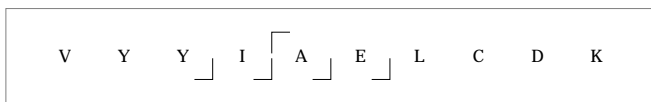



dbValid true YWDDNNIYKK PHOS(1) 2. 720. -0.194438 5.08592 100. ? 2562.  
 S\_Acido\_new%gi|68567062|gb|AAY79991.1| YWDDNNIYKK%::::::PHOS:::sample\_1%cmpd\_1200

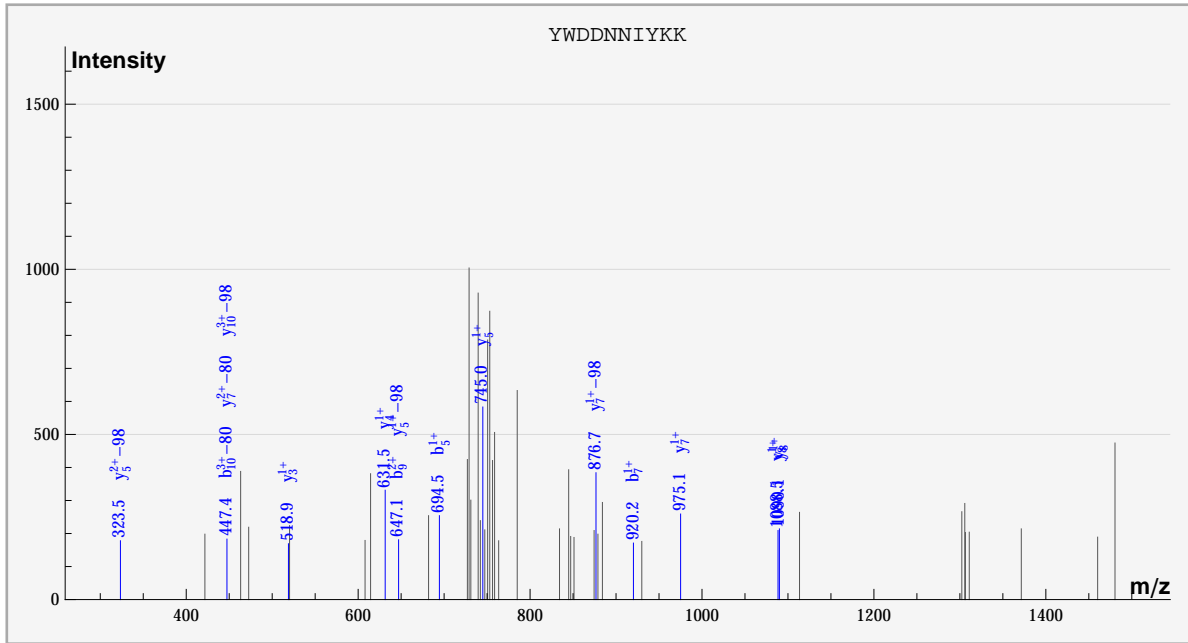

|   | #  | b | b* | # | y | y* | P | P* |
|---|----|---|----|---|---|----|---|----|
| Y | 1  |   |    |   |   |    |   | ✓  |
| W | 2  |   |    | 9 |   |    |   |    |
| D | 3  |   |    | 8 | ✓ |    |   |    |
| D | 4  |   |    | 7 | ✓ | ✓  |   |    |
| N | 5  | ✓ |    | 6 |   |    |   |    |
| N | 6  |   |    | 5 | ✓ | ✓  |   |    |
| I | 7  | ✓ |    | 4 | ✓ |    |   |    |
| Y | 8  |   |    | 3 | ✓ |    |   |    |
| K | 9  | ✓ |    | 2 |   |    |   |    |
| K | 10 |   | ✓  | 1 |   |    |   |    |

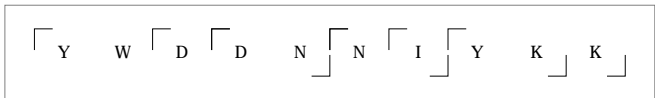

dbValid true KYIavgSSEVPK PHOS(2) 2. 721. -1.67508 5.14888 100. ? 2448.  
 S\_Acido\_new%gil68567822|gb|AAY80751.1| KYIavgSSEVPK%::PHOS:::PHOS:::sample\_1%cmpd\_1037

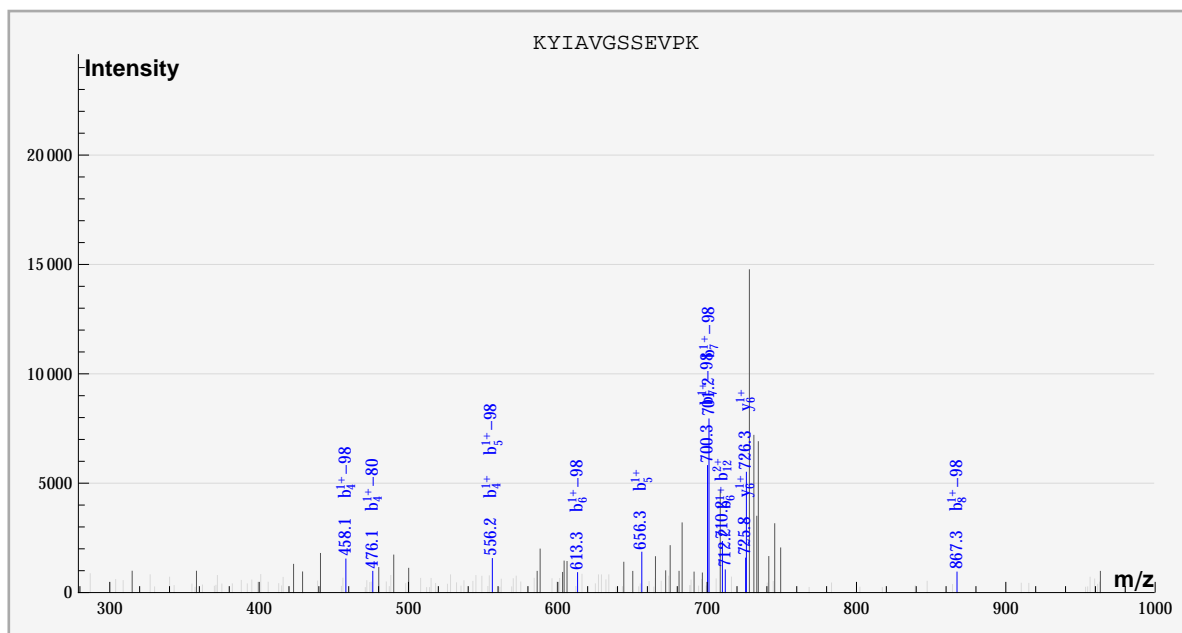

|   | #  | b | b* | #  | y | y* | P | P* |
|---|----|---|----|----|---|----|---|----|
| K | 1  |   |    |    |   |    |   |    |
| Y | 2  |   |    | 11 |   |    |   |    |
| I | 3  |   |    | 10 |   |    |   |    |
| A | 4  | ✓ | ✓  | 9  |   |    |   |    |
| V | 5  | ✓ | ✓  | 8  |   |    |   |    |
| G | 6  | ✓ | ✓  | 7  |   |    |   |    |
| S | 7  |   | ✓  | 6  | ✓ |    |   |    |
| S | 8  |   | ✓  | 5  |   |    |   |    |
| E | 9  |   |    | 4  |   |    |   |    |
| V | 10 |   |    | 3  |   |    |   |    |
| P | 11 |   |    | 2  |   |    |   |    |
| K | 12 | ✓ |    | 1  |   |    |   |    |

K Y I A V G S S E V P K

dbValid true FYNSTFFSLR PHOS(2) 2. 721. 0.283067 5.42008 100. ? 4662.  
 S\_Acido\_new%gi|68568068|gb|AAy80997.1| FYNSTFFSLR%::PHOS::PHOS:::sample\_1%compd\_3115

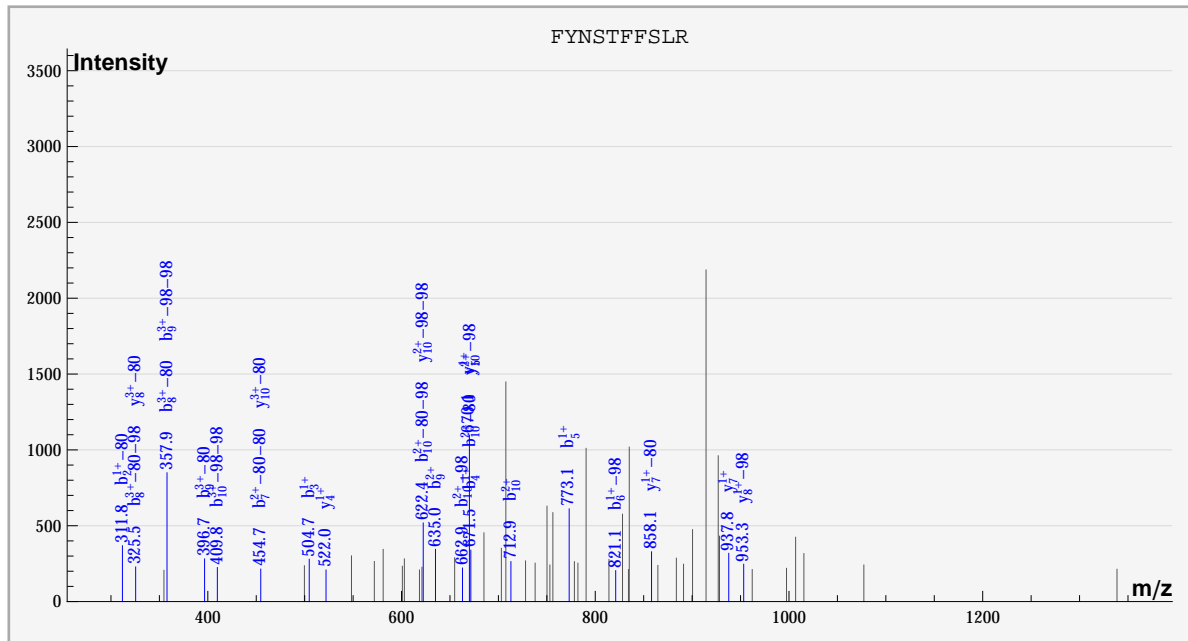

|   | #  | b | b* | # | y | y* | P | P* |
|---|----|---|----|---|---|----|---|----|
| F | 1  |   |    |   |   |    |   | ✓  |
| Y | 2  |   | ✓  | 9 |   |    |   |    |
| N | 3  | ✓ |    | 8 |   | ✓  |   |    |
| S | 4  | ✓ |    | 7 | ✓ | ✓  |   |    |
| T | 5  | ✓ |    | 6 |   |    |   |    |
| F | 6  |   | ✓  | 5 | ✓ |    |   |    |
| F | 7  | ✓ | ✓  | 4 | ✓ |    |   |    |
| S | 8  | ✓ | ✓  | 3 |   |    |   |    |
| L | 9  | ✓ | ✓  | 2 |   |    |   |    |
| R | 10 | ✓ | ✓  | 1 |   |    |   |    |

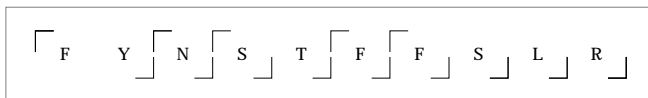

dbValid true TRNDMISILRK Oxidation\_M(1),PHOS(1) 2. 722.02 -0.157118 5.28391 100. ? 4206.  
 S\_Acido\_new%gi|68568642|gb|AAY81571.1| TRNDMISILRK%:PHOS:::Oxidation\_M:::sample\_1%compd\_3005

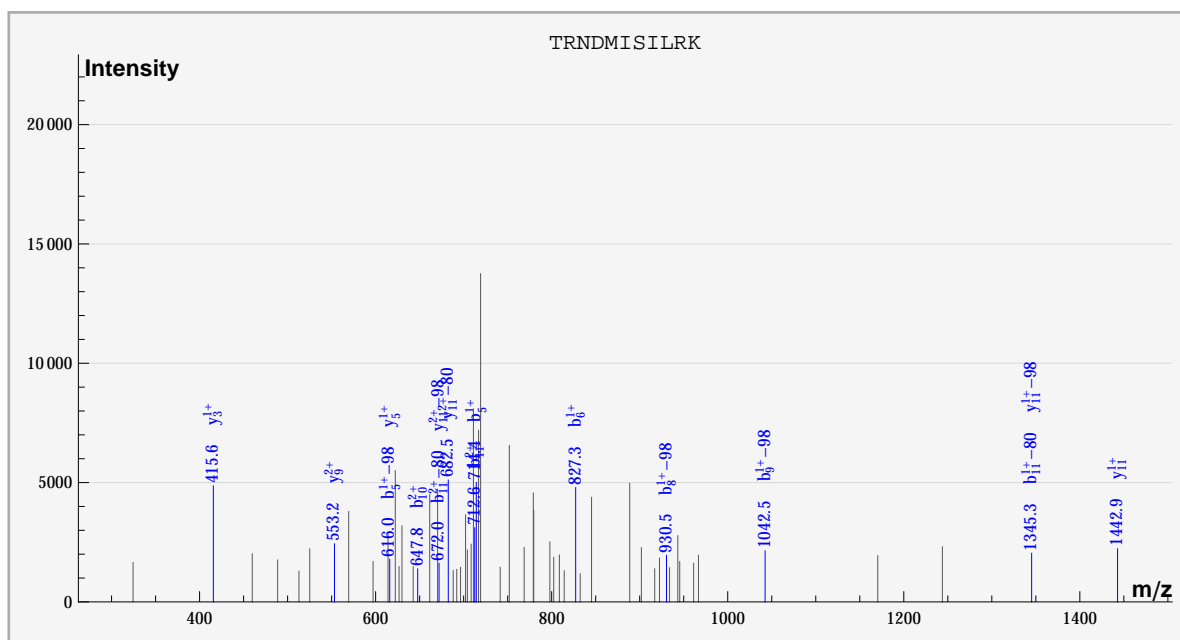

|   | #  | b | b* | #  | y | y* | P | P* |
|---|----|---|----|----|---|----|---|----|
| T | 1  |   |    |    |   |    | ✓ | ✓  |
| R | 2  |   |    | 10 |   |    |   |    |
| N | 3  |   |    | 9  | ✓ |    |   |    |
| D | 4  |   |    | 8  |   |    |   |    |
| M | 5  | ✓ | ✓  | 7  |   |    |   |    |
| I | 6  | ✓ |    | 6  |   |    |   |    |
| S | 7  |   |    | 5  | ✓ |    |   |    |
| I | 8  |   | ✓  | 4  |   |    |   |    |
| L | 9  |   | ✓  | 3  | ✓ |    |   |    |
| R | 10 | ✓ |    | 2  |   |    |   |    |
| K | 11 | ✓ | ✓  | 1  |   |    |   |    |

T R N D M I S I L R K

dbValid true RMKLMGLINTR Oxidation\_M(2),PHOS(1) 2. 723. -0.138178 5.20206 100. ? 2712.

S\_Acido\_new%gil68567337|gb|AAY80266.1| RMKLMGLINTR::Oxidation\_M:::Oxidation\_M:::PHOS::%sample\_1%compd\_1335

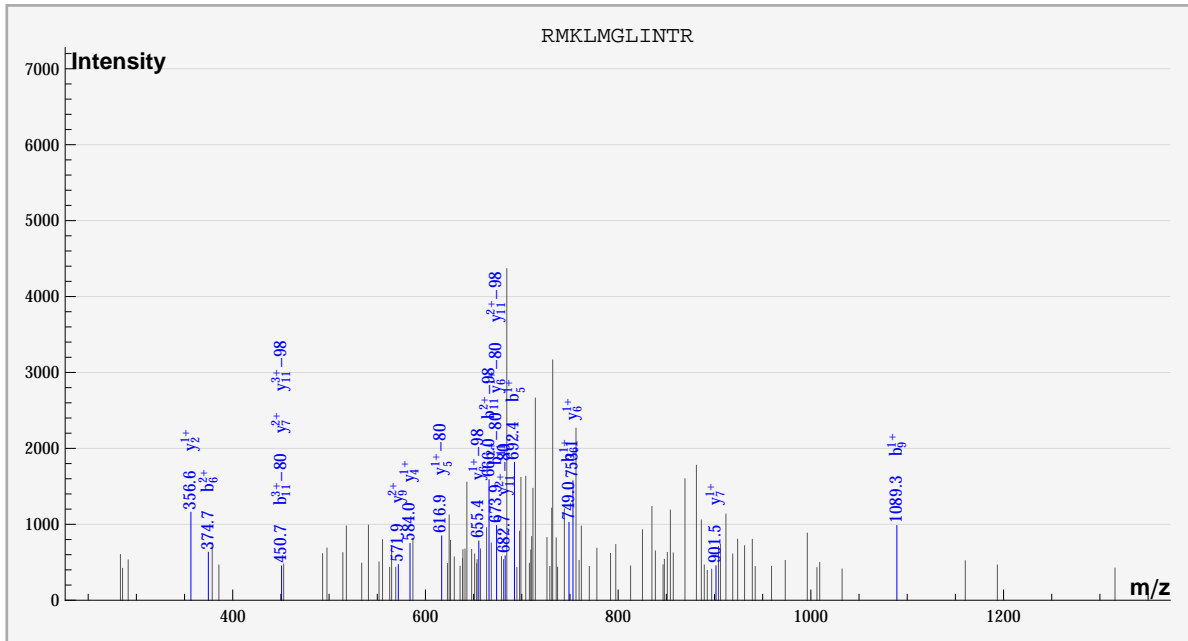

|   | #  | b | b* | #  | y | y* | P | P* |
|---|----|---|----|----|---|----|---|----|
| R | 1  |   |    |    |   |    |   | ✓  |
| M | 2  |   |    | 10 |   |    |   |    |
| K | 3  |   |    | 9  | ✓ |    |   |    |
| L | 4  |   |    | 8  |   |    |   |    |
| M | 5  | ✓ |    | 7  | ✓ |    |   |    |
| G | 6  | ✓ |    | 6  | ✓ | ✓  |   |    |
| L | 7  |   |    | 5  |   | ✓  |   |    |
| I | 8  |   |    | 4  | ✓ |    |   |    |
| N | 9  | ✓ |    | 3  |   |    |   |    |
| T | 10 |   |    | 2  | ✓ |    |   |    |
| R | 11 |   | ✓  | 1  |   |    |   |    |

RMKLMGLINTR

dbValid true YYEMYSR PHOS(4) 2. 724. -0.830263 5.61354 100. ? 1764.

S\_Acido\_new%gi|68567117|gb|AA80046.1| YYEMYSR::PHOS:PHOS::PHOS::PHOS::%sample\_1%compd\_474

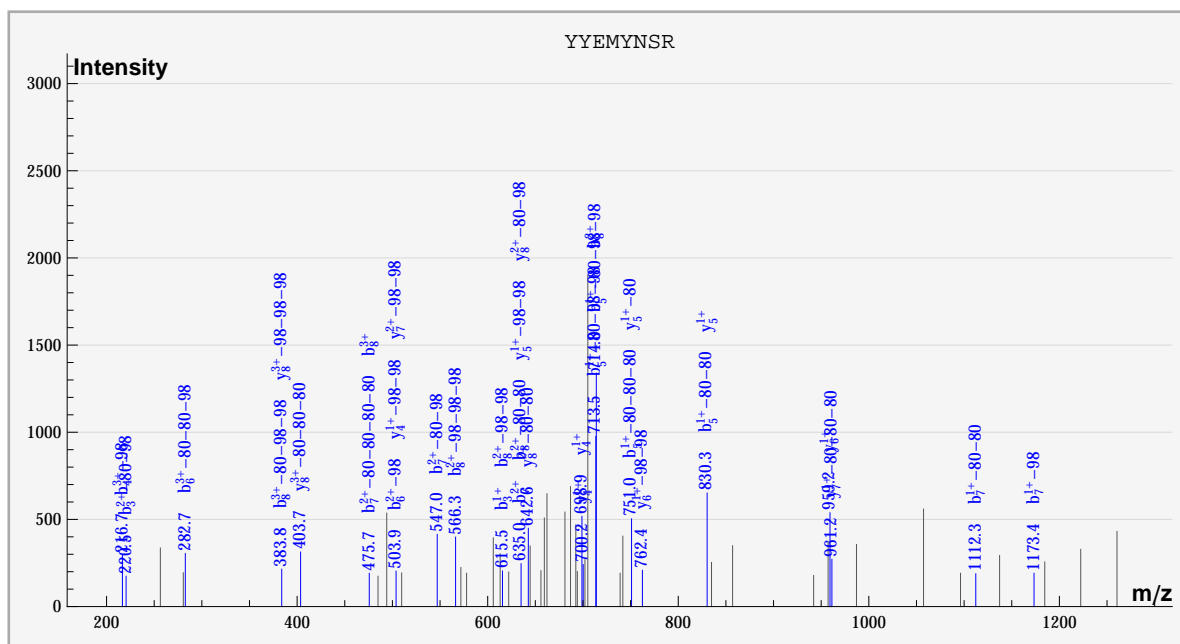

|   | # | b | b* | # | y | y* | P | P* |
|---|---|---|----|---|---|----|---|----|
| Y | 1 |   |    |   |   |    |   | ✓  |
| Y | 2 |   |    | 7 |   | ✓  |   |    |
| E | 3 | ✓ | ✓  | 6 | ✓ | ✓  |   |    |
| M | 4 |   | ✓  | 5 | ✓ | ✓  |   |    |
| Y | 5 |   | ✓  | 4 | ✓ | ✓  |   |    |
| N | 6 |   | ✓  | 3 |   |    |   |    |
| S | 7 | ✓ | ✓  | 2 |   |    |   |    |
| R | 8 | ✓ | ✓  | 1 |   |    |   |    |

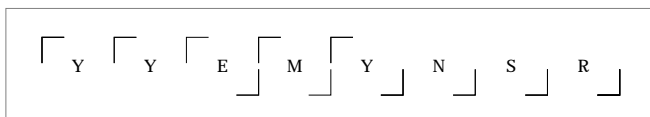







dbValid true RHYELGSIIRK PHOS(1) 2. 725. 1.37956 5.56418 100. ? 3510.  
 S\_Acido\_new%gil68568598|gb|AAY81527.1| RHYELGSIIRK%:::PHOS:::::sample\_1%cmpd\_2066

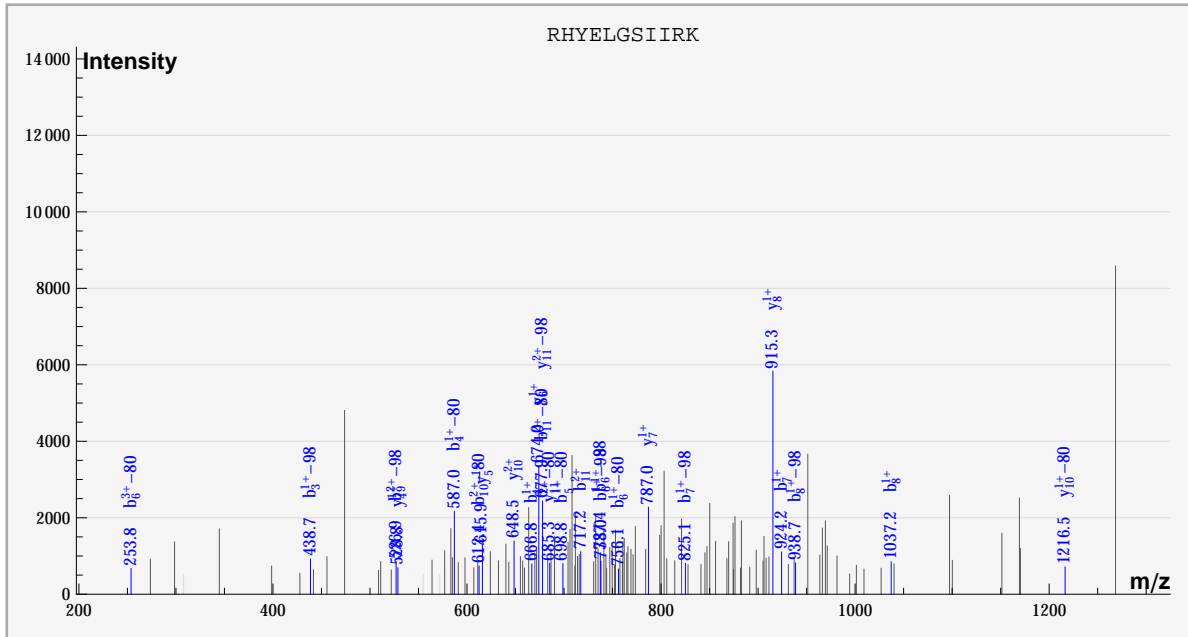

|   | #  | b | b* | #  | y | y* | P | P* |
|---|----|---|----|----|---|----|---|----|
| R | 1  |   |    |    |   |    |   | ✓  |
| H | 2  |   |    | 10 | ✓ | ✓  |   |    |
| Y | 3  |   | ✓  | 9  |   |    |   |    |
| E | 4  | ✓ | ✓  | 8  | ✓ |    |   |    |
| L | 5  |   | ✓  | 7  | ✓ |    |   |    |
| G | 6  |   | ✓  | 6  | ✓ |    |   |    |
| S | 7  | ✓ | ✓  | 5  | ✓ |    |   |    |
| I | 8  | ✓ | ✓  | 4  | ✓ |    |   |    |
| I | 9  |   | ✓  | 3  |   |    |   |    |
| R | 10 |   | ✓  | 2  |   |    |   |    |
| K | 11 | ✓ | ✓  | 1  |   |    |   |    |

R H Y E L G S I I R K

dbValid true MGVR AEEIYR Oxidation\_M(1),PHOS(1) 2. 725. -0.184408 6.31461 100. ? 4182.  
 S\_Acido\_new%gi|68568482|gb|AAY81411.1| MGVR AEEIYR%:Oxidation\_M:::::PHOS::%sample\_1%compd\_2677

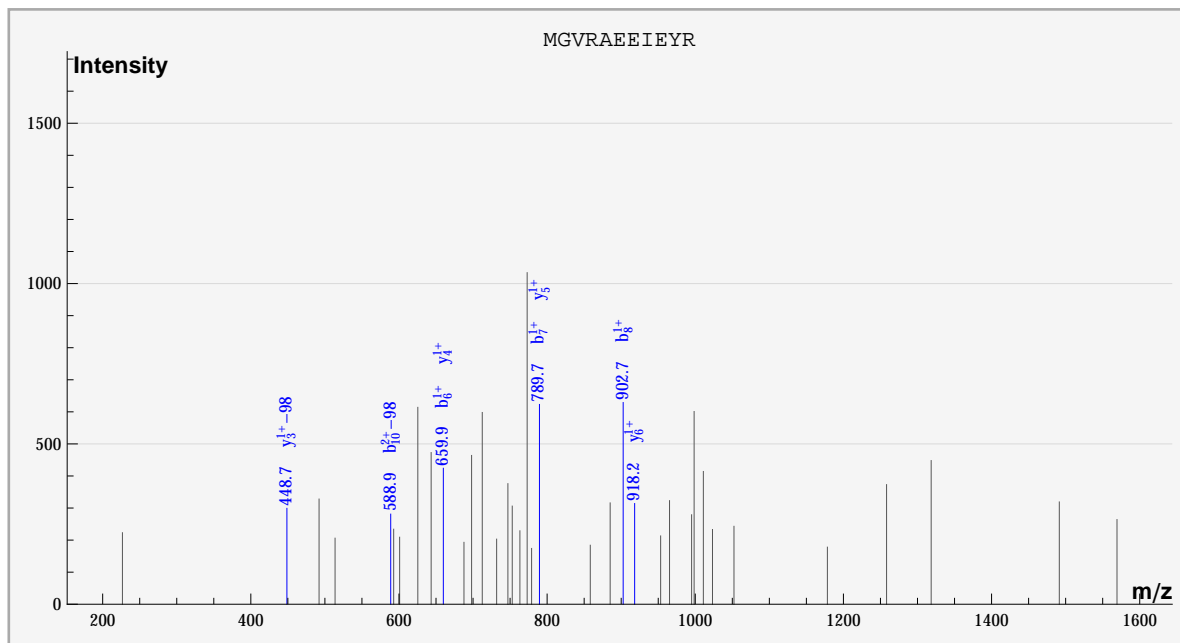

|   | #  | b | b* | #  | y | y* | P | P* |
|---|----|---|----|----|---|----|---|----|
| M | 1  |   |    |    |   |    |   |    |
| G | 2  |   |    | 10 |   |    |   |    |
| V | 3  |   |    | 9  |   |    |   |    |
| R | 4  |   |    | 8  |   |    |   |    |
| A | 5  |   |    | 7  |   |    |   |    |
| E | 6  | ✓ |    | 6  | ✓ |    |   |    |
| E | 7  | ✓ |    | 5  | ✓ |    |   |    |
| I | 8  | ✓ |    | 4  | ✓ |    |   |    |
| E | 9  |   |    | 3  |   | ✓  |   |    |
| Y | 10 |   | ✓  | 2  |   |    |   |    |
| R | 11 |   |    | 1  |   |    |   |    |

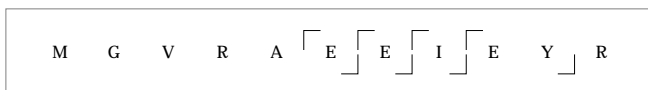

dbValid true MGVRAEEIYR Oxidation\_M(1),PHOS(1) 2. 726. -1.18441 5.35209 100. ? 624.  
 S\_Acido\_new%gi|68568482|gb|AAY81411.1| MGVRAEEIYR%:Oxidation\_M:::::PHOS::%sample\_1%compd\_3837

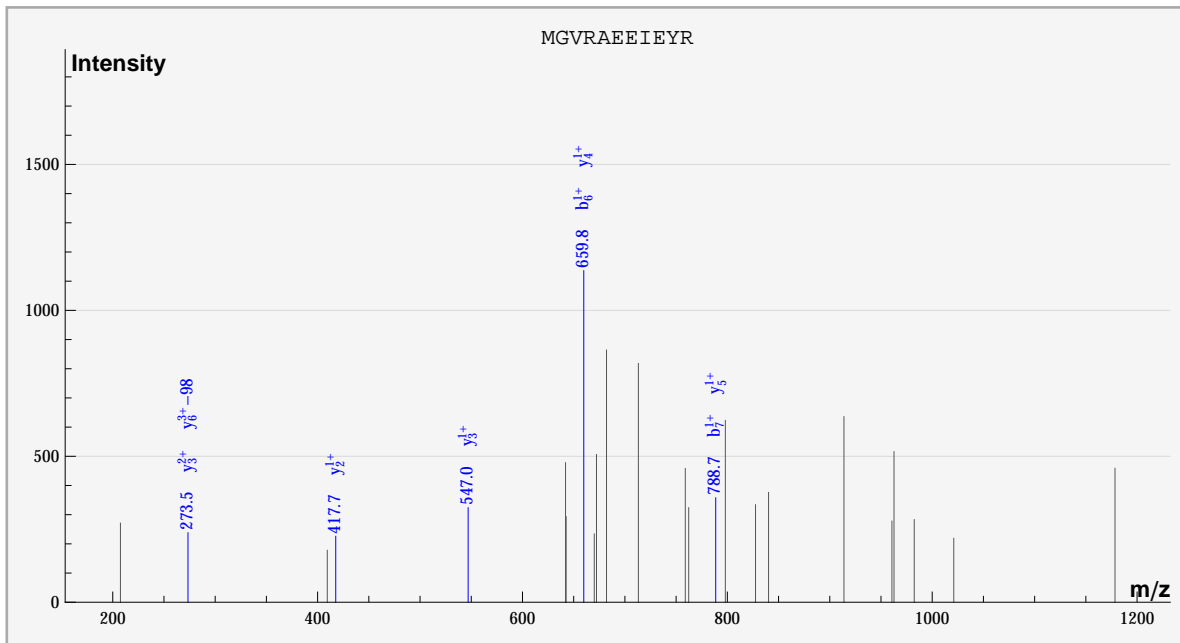

|   | #  | b | b* | #  | y | y* | P | P* |
|---|----|---|----|----|---|----|---|----|
| M | 1  |   |    |    |   |    |   |    |
| G | 2  |   |    | 10 |   |    |   |    |
| V | 3  |   |    | 9  |   |    |   |    |
| R | 4  |   |    | 8  |   |    |   |    |
| A | 5  |   |    | 7  |   |    |   |    |
| E | 6  | ✓ |    | 6  |   | ✓  |   |    |
| E | 7  | ✓ |    | 5  | ✓ |    |   |    |
| I | 8  |   |    | 4  | ✓ |    |   |    |
| E | 9  |   |    | 3  | ✓ |    |   |    |
| Y | 10 |   |    | 2  | ✓ |    |   |    |
| R | 11 |   |    | 1  |   |    |   |    |

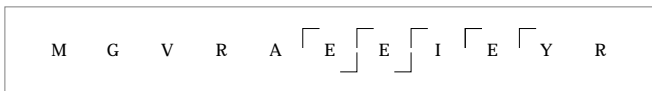

dbValid true KYNVILSDYPR PHOS(1) 2. 726. -1.64732 5.12318 100. ? 2142.  
 S\_Acido\_new%gii68567657|gb|AAY80586.1| KYNVILSDYPR%:::::PHOS:::sample\_1%cmpd\_818

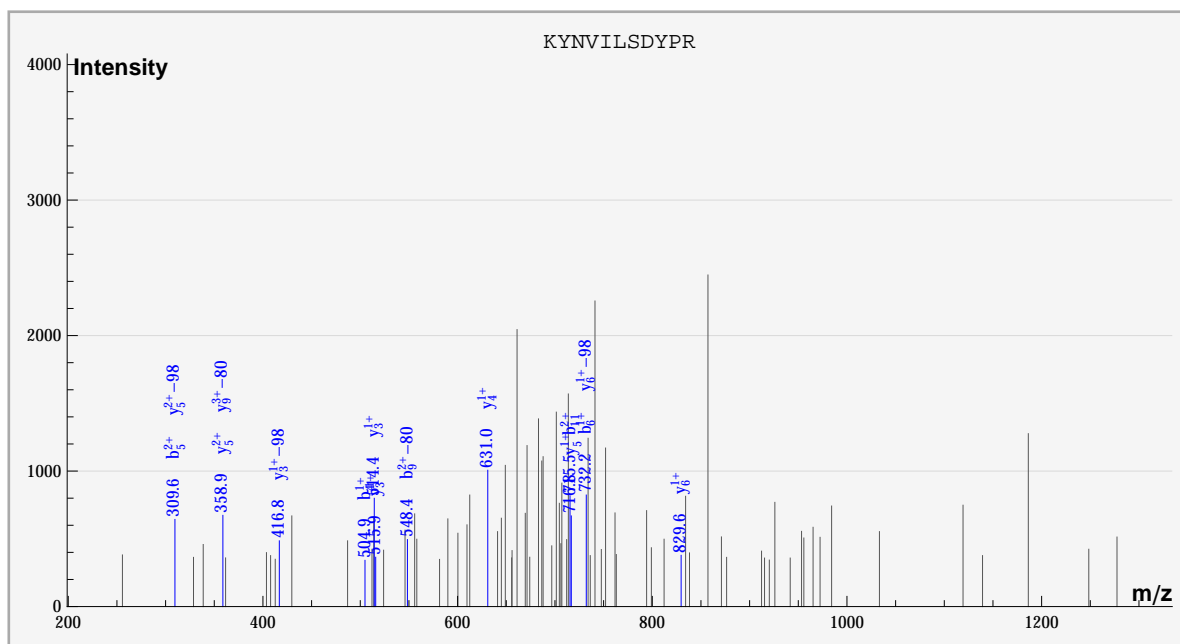

|   | #  | b | b* | #  | y | y* | P | P* |
|---|----|---|----|----|---|----|---|----|
| K | 1  |   |    |    |   |    |   |    |
| Y | 2  |   |    | 10 |   |    |   |    |
| N | 3  |   |    | 9  |   | ✓  |   |    |
| V | 4  | ✓ |    | 8  |   |    |   |    |
| I | 5  | ✓ |    | 7  |   |    |   |    |
| L | 6  | ✓ |    | 6  | ✓ | ✓  |   |    |
| S | 7  |   |    | 5  | ✓ | ✓  |   |    |
| D | 8  |   |    | 4  | ✓ |    |   |    |
| Y | 9  |   | ✓  | 3  | ✓ | ✓  |   |    |
| P | 10 |   |    | 2  |   |    |   |    |
| R | 11 | ✓ |    | 1  |   |    |   |    |

K Y N V I L S D Y P R

dbValid true IYTIGAPRYR PHOS(3) 2. 726. -0.709978 5.15964 100. ? 2178.

S\_Acido\_new%gi|68567688|gb|AA80617.1| IYTIGAPRYR::PHOS:PHOS:::PHOS::%sample\_1%compd\_851

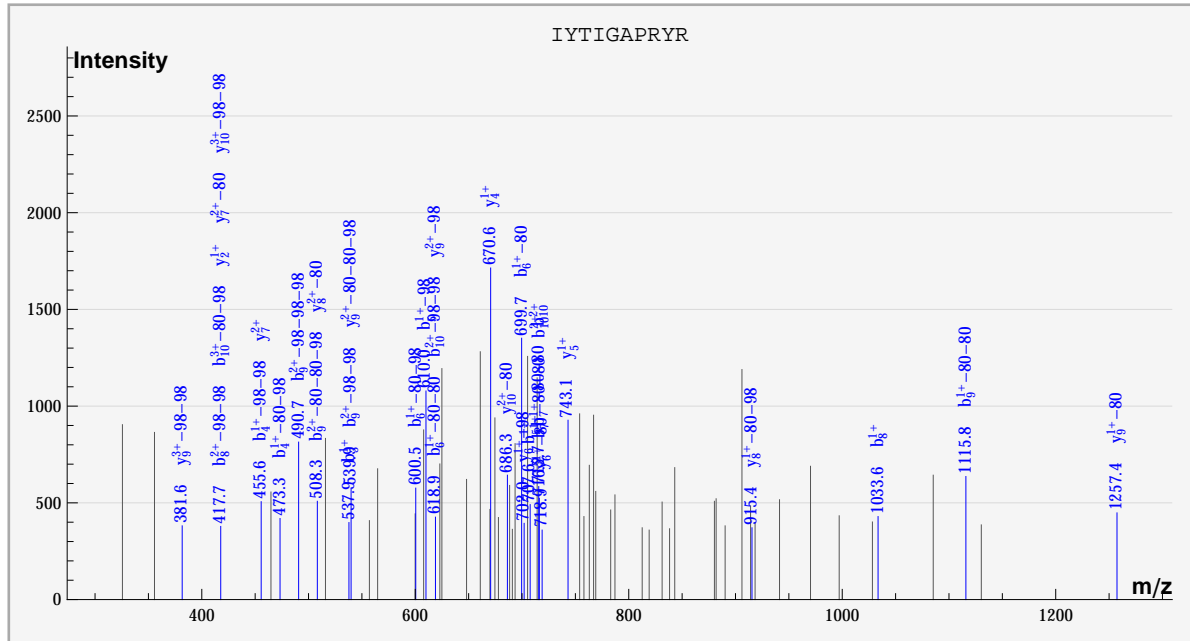

|   | #  | b | b* | # | y | y* | P | P* |
|---|----|---|----|---|---|----|---|----|
| I | 1  |   |    |   |   |    |   | ✓  |
| Y | 2  |   |    | 9 |   | ✓  |   |    |
| T | 3  | ✓ |    | 8 |   | ✓  |   |    |
| I | 4  |   | ✓  | 7 | ✓ | ✓  |   |    |
| G | 5  | ✓ | ✓  | 6 |   | ✓  |   |    |
| A | 6  |   | ✓  | 5 | ✓ |    |   |    |
| P | 7  |   | ✓  | 4 | ✓ |    |   |    |
| R | 8  | ✓ | ✓  | 3 |   |    |   |    |
| Y | 9  |   | ✓  | 2 | ✓ |    |   |    |
| R | 10 | ✓ | ✓  | 1 |   |    |   |    |

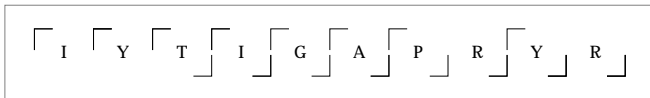

dbValid true LLYKSGFRMPR PHOS(1) 2. 726. -1.63239 5.60041 100. ? 2502.  
 S\_Acido\_new%gi|68568668|gb|AA81597.1| LLYKSGFRMPR%::PHOS:.....%sample\_1%compd\_1151

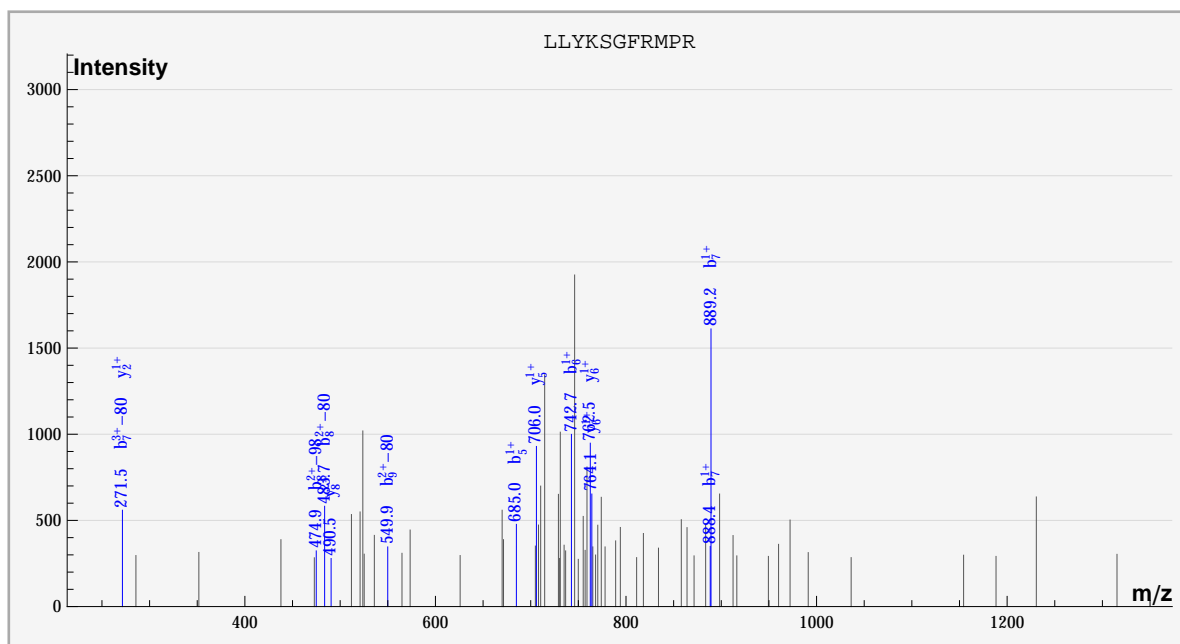

|   | #  | b | b* | #  | y | y* | P | P* |
|---|----|---|----|----|---|----|---|----|
| L | 1  |   |    |    |   |    |   |    |
| L | 2  |   |    | 10 |   |    |   |    |
| Y | 3  |   |    | 9  |   |    |   |    |
| K | 4  |   |    | 8  | ✓ |    |   |    |
| S | 5  | ✓ |    | 7  |   |    |   |    |
| G | 6  | ✓ |    | 6  | ✓ |    |   |    |
| F | 7  | ✓ | ✓  | 5  | ✓ |    |   |    |
| R | 8  |   | ✓  | 4  |   |    |   |    |
| M | 9  |   | ✓  | 3  |   |    |   |    |
| P | 10 |   |    | 2  | ✓ |    |   |    |
| R | 11 |   |    | 1  |   |    |   |    |

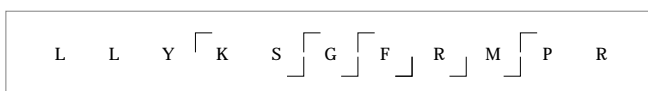

dbValid true KPNTTS PHOS(1) 1. 726. 1.3022 5.01045 100. ? 2676.

S\_Acido\_new%gi|68567968|gb|AAY80897.1| KPNTTS%::::PHOS::%sample\_1%cmpd\_1305

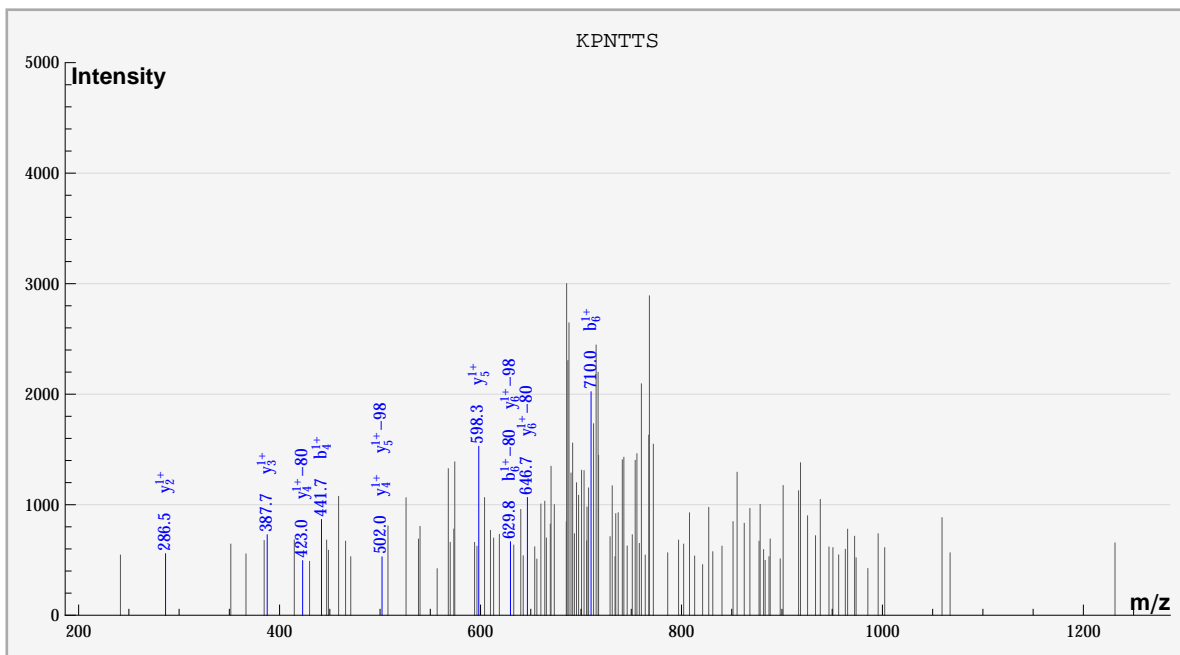

|   | # | b | b* | # | y | y* | P | P* |
|---|---|---|----|---|---|----|---|----|
| K | 1 |   |    |   |   |    |   | ✓  |
| P | 2 |   |    | 5 | ✓ | ✓  |   |    |
| N | 3 |   |    | 4 | ✓ | ✓  |   |    |
| T | 4 | ✓ |    | 3 | ✓ |    |   |    |
| T | 5 |   |    | 2 | ✓ |    |   |    |
| S | 6 | ✓ | ✓  | 1 |   |    |   |    |

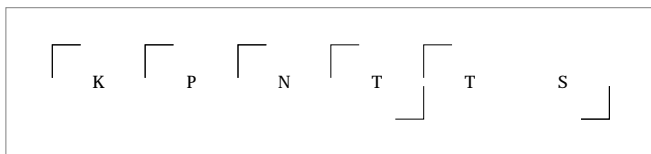

dbConflictWinner true LLSILPYETK PHOS(2) 2. 727. -1.64431 5.73944 100. ? 1650.  
 S\_Acido\_new%gi|68567386|gb|AAY80315.1| LLSILPYETK%:::PHOS:::PHOS::%sample\_1%cmpd\_368

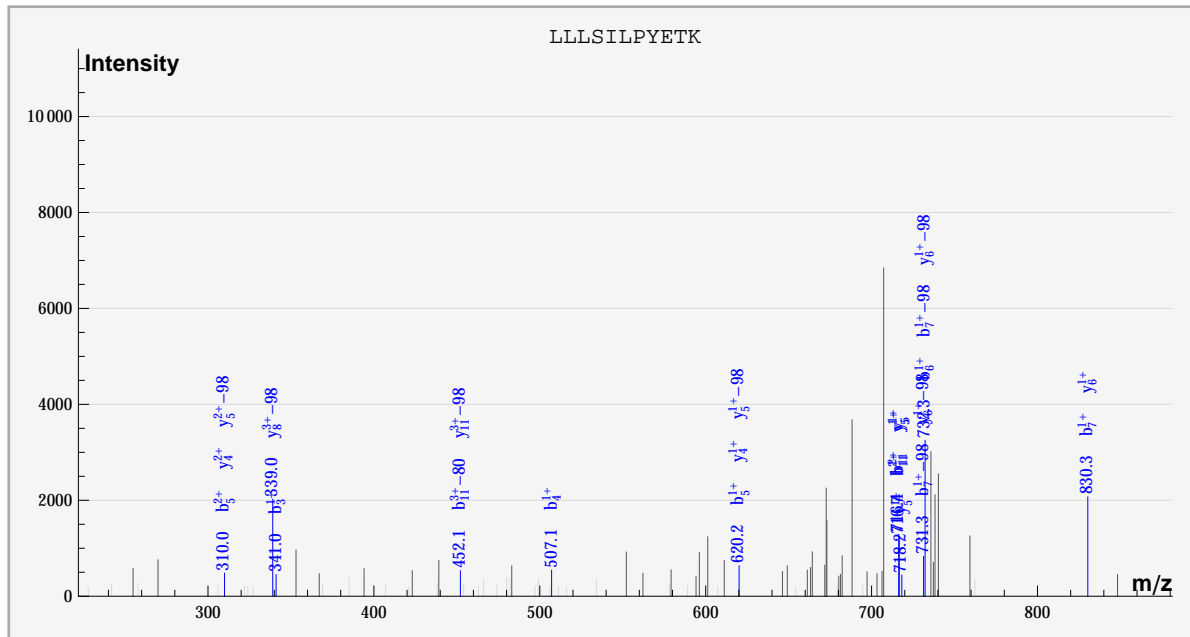

|   | #  | b | b* | #  | y | y* | P | P* |
|---|----|---|----|----|---|----|---|----|
| L | 1  |   |    |    |   |    |   | ✓  |
| L | 2  |   |    | 10 |   |    |   |    |
| L | 3  | ✓ |    | 9  |   |    |   |    |
| S | 4  | ✓ |    | 8  |   | ✓  |   |    |
| I | 5  | ✓ |    | 7  |   |    |   |    |
| L | 6  | ✓ |    | 6  | ✓ | ✓  |   |    |
| P | 7  | ✓ | ✓  | 5  | ✓ | ✓  |   |    |
| Y | 8  |   |    | 4  | ✓ |    |   |    |
| E | 9  |   |    | 3  |   |    |   |    |
| T | 10 |   |    | 2  |   |    |   |    |
| K | 11 | ✓ | ✓  | 1  |   |    |   |    |

LLSILPYETK



dbValid true FRSTGHGISAASGK PHOS(1) 2. 727. 1.34063 5.26894 100. ? 3198.  
 S\_Acido\_new%gil68567322|gb|AAy80251.1| FRSTGHGISAASGK%:.....PHOS:::sample\_1%compd\_1781

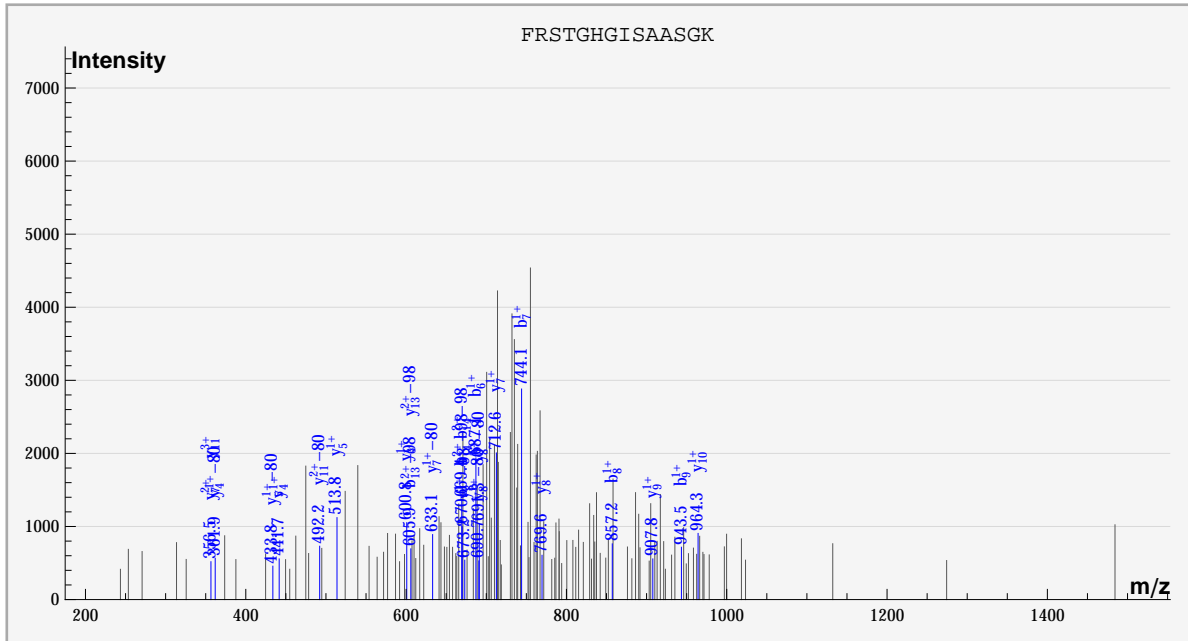

|   | #  | b | b* | #  | y | y* | P | P* |
|---|----|---|----|----|---|----|---|----|
| F | 1  |   |    |    |   |    |   |    |
| R | 2  |   |    | 13 |   | ✓  |   |    |
| S | 3  |   |    | 12 |   |    |   |    |
| T | 4  |   |    | 11 | ✓ | ✓  |   |    |
| G | 5  |   |    | 10 | ✓ |    |   |    |
| H | 6  | ✓ |    | 9  | ✓ |    |   |    |
| G | 7  | ✓ |    | 8  | ✓ | ✓  |   |    |
| I | 8  | ✓ |    | 7  | ✓ | ✓  |   |    |
| S | 9  | ✓ |    | 6  | ✓ |    |   |    |
| A | 10 |   |    | 5  | ✓ | ✓  |   |    |
| A | 11 |   |    | 4  | ✓ | ✓  |   |    |
| S | 12 |   |    | 3  |   |    |   |    |
| G | 13 | ✓ |    | 2  |   |    |   |    |
| K | 14 | ✓ |    | 1  |   |    |   |    |

F R S T G H G I S A A S G K

dbValid true LSQSITE PHOS(1) 1. 727. 1.3226 5.2106 100. ? 3612.  
 S\_Acido\_new%gi|68568303|gb|AAY81232.1| LSQSITE%:::::PHOS:%sample\_1%compd\_2157

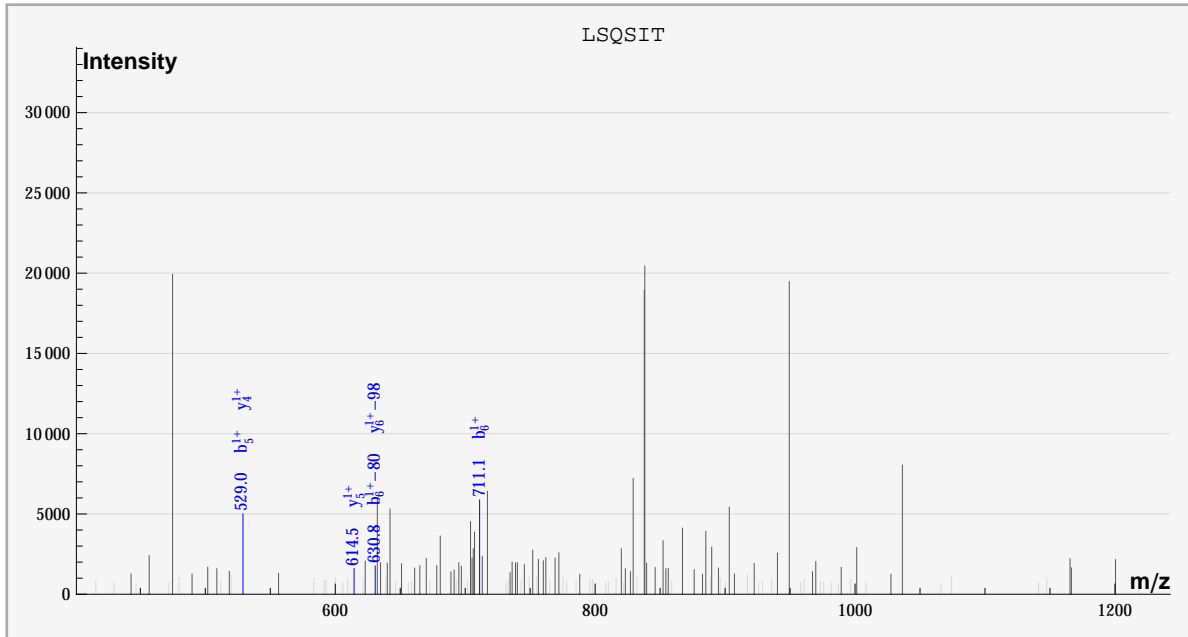

|   | # | b | b* | # | y | y* | P | P* |
|---|---|---|----|---|---|----|---|----|
| L | 1 |   |    |   |   |    |   | ✓  |
| S | 2 |   |    | 5 | ✓ |    |   |    |
| Q | 3 |   |    | 4 | ✓ |    |   |    |
| S | 4 |   |    | 3 |   |    |   |    |
| I | 5 | ✓ |    | 2 |   |    |   |    |
| T | 6 | ✓ | ✓  | 1 |   |    |   |    |

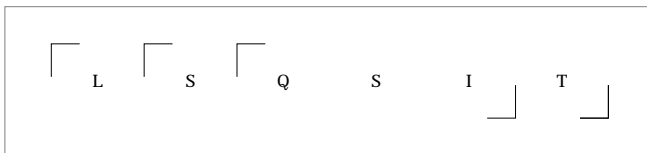

dbValid true ATVEDYGSICEK Cys\_CAM(1),PHOS(1) 2. 728. -1.70838 5.37882 100. ? 3102.  
 S\_Acido\_new%gil68568008|gb|AAAY80937.1| ATVEDYGSICEK%:::PHOS::Cys\_CAM:::sample\_1%compd\_1693

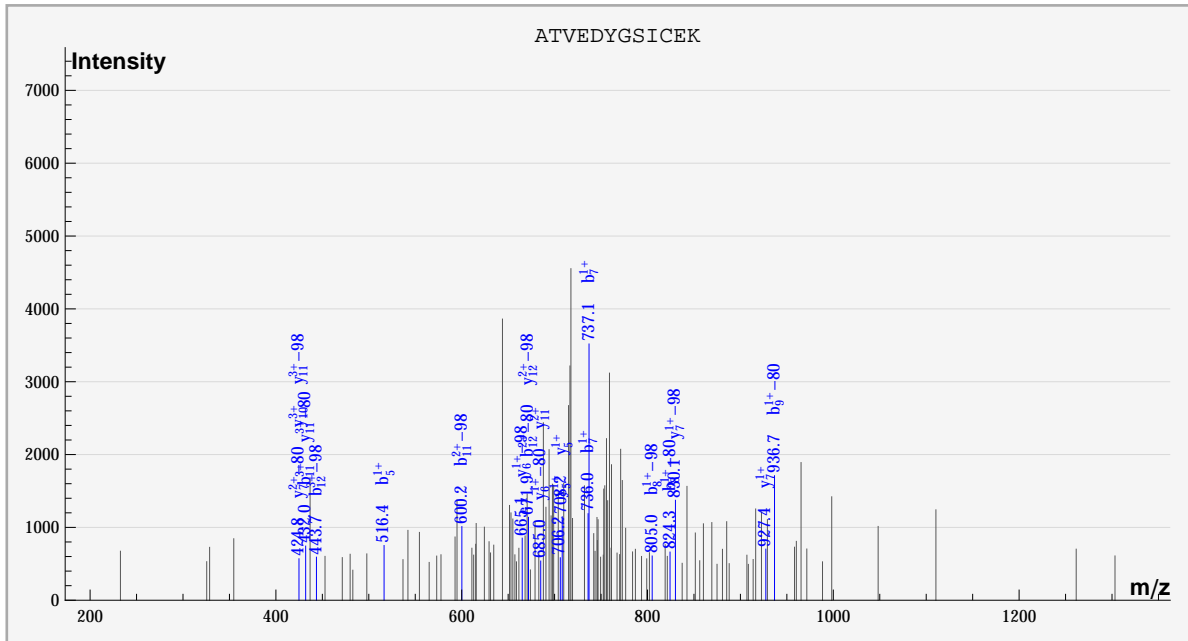

|   | #  | b | b* | #  | y | y* | P | P* |
|---|----|---|----|----|---|----|---|----|
| A | 1  |   |    |    |   |    |   | ✓  |
| T | 2  |   |    | 11 | ✓ | ✓  |   |    |
| V | 3  |   |    | 10 | ✓ |    |   |    |
| E | 4  |   |    | 9  |   |    |   |    |
| D | 5  | ✓ |    | 8  |   |    |   |    |
| Y | 6  |   |    | 7  | ✓ | ✓  |   |    |
| G | 7  | ✓ |    | 6  |   | ✓  |   |    |
| S | 8  |   | ✓  | 5  | ✓ |    |   |    |
| I | 9  |   | ✓  | 4  |   |    |   |    |
| C | 10 |   |    | 3  |   |    |   |    |
| E | 11 | ✓ | ✓  | 2  |   |    |   |    |
| K | 12 |   | ✓  | 1  |   |    |   |    |

┌ A ─┤ ┌ T ─┤ ┌ V ─┤ E ─┤ D ─┤ ┌ Y ─┤ ┌ G ─┤ ┌ S ─┤ ┌ I ─┤ C ─┤ E ─┤ K ─┤

dbValid true EYVDVYDVMNK PHOS(1) 2. 729. -1.20091 5.63283 100. ? 78.  
 S\_Acido\_new%gi|68567694|gb|AA80623.1| EYVDVYDVMNK%:::PHOS:::sample\_1%compd\_3938

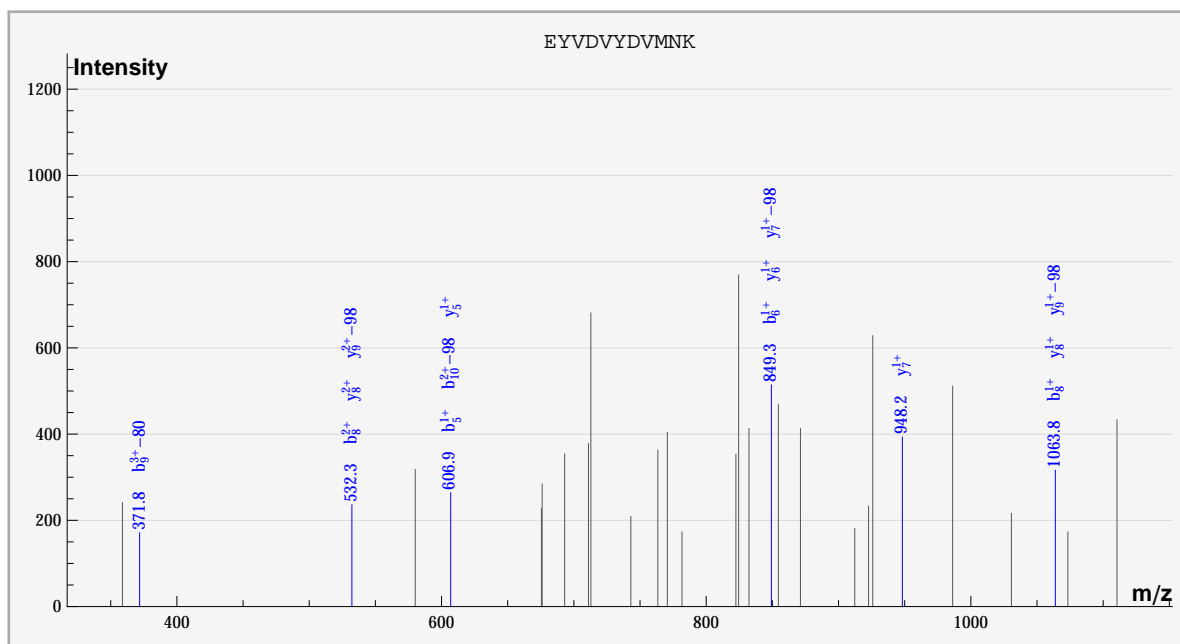

|   | #  | b | b* | #  | y | y* | P | P* |
|---|----|---|----|----|---|----|---|----|
| E | 1  |   |    |    |   |    |   |    |
| Y | 2  |   |    | 10 |   |    |   |    |
| V | 3  |   |    | 9  |   | ✓  |   |    |
| D | 4  |   |    | 8  | ✓ |    |   |    |
| V | 5  | ✓ |    | 7  | ✓ | ✓  |   |    |
| Y | 6  | ✓ |    | 6  | ✓ |    |   |    |
| D | 7  |   |    | 5  | ✓ |    |   |    |
| V | 8  | ✓ |    | 4  |   |    |   |    |
| M | 9  |   | ✓  | 3  |   |    |   |    |
| N | 10 |   | ✓  | 2  |   |    |   |    |
| K | 11 |   |    | 1  |   |    |   |    |

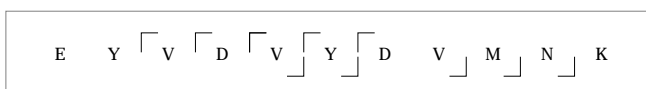

dbValid true KLLYYPLMVR PHOS(2) 2. 729. -0.652848 5.07369 100. ? 1410.  
 S\_Acido\_new%gi|68568283|gb|AAy81212.1| KLLYYPLMVR%:::PHOS:PHOS:::sample\_1%compd\_166

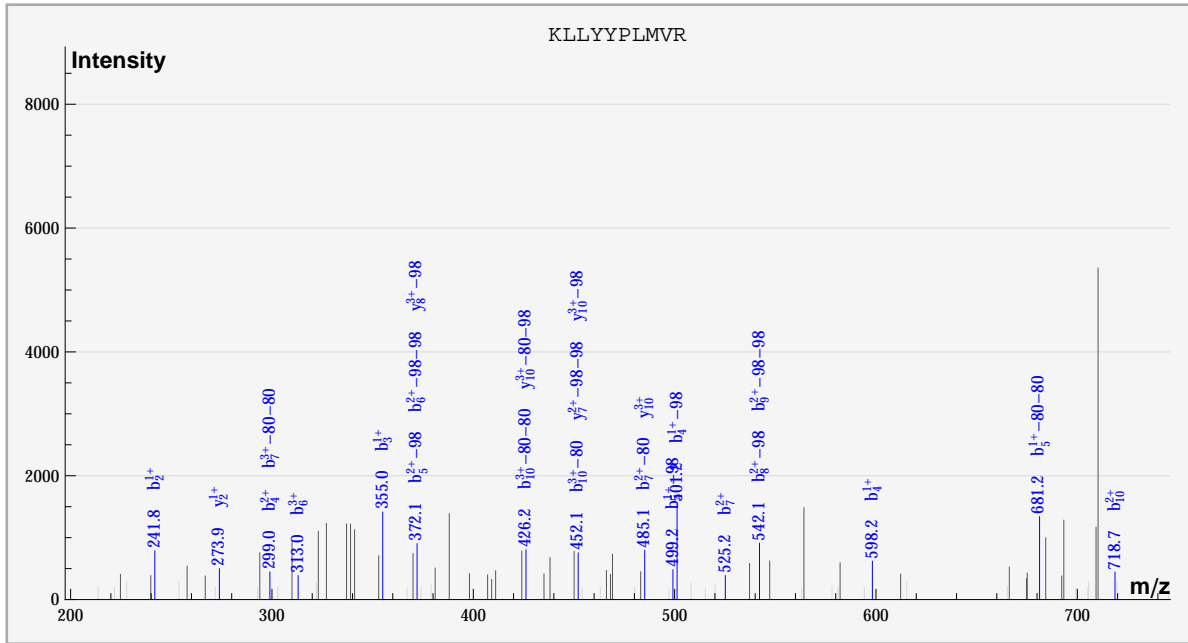

|   | #  | b | b* | # | y | y* | P | P* |
|---|----|---|----|---|---|----|---|----|
| K | 1  |   |    |   |   |    | ✓ | ✓  |
| L | 2  | ✓ |    | 9 |   |    |   |    |
| L | 3  | ✓ |    | 8 |   | ✓  |   |    |
| Y | 4  | ✓ | ✓  | 7 |   | ✓  |   |    |
| Y | 5  |   | ✓  | 6 |   |    |   |    |
| P | 6  | ✓ | ✓  | 5 |   |    |   |    |
| L | 7  | ✓ | ✓  | 4 |   |    |   |    |
| M | 8  |   | ✓  | 3 |   |    |   |    |
| V | 9  |   | ✓  | 2 | ✓ |    |   |    |
| R | 10 | ✓ | ✓  | 1 |   |    |   |    |

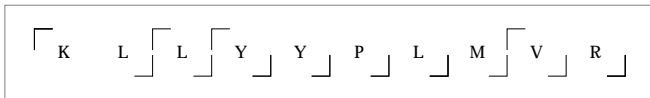

dbValid true GNESLK PHOS(1) 1. 729. -1.69782 5.26877 100. ? 2106.  
 S\_Acido\_new%gi|68568681|gb|AAY81610.1| GNESLK%:::PHOS:::sample\_1%compd\_789

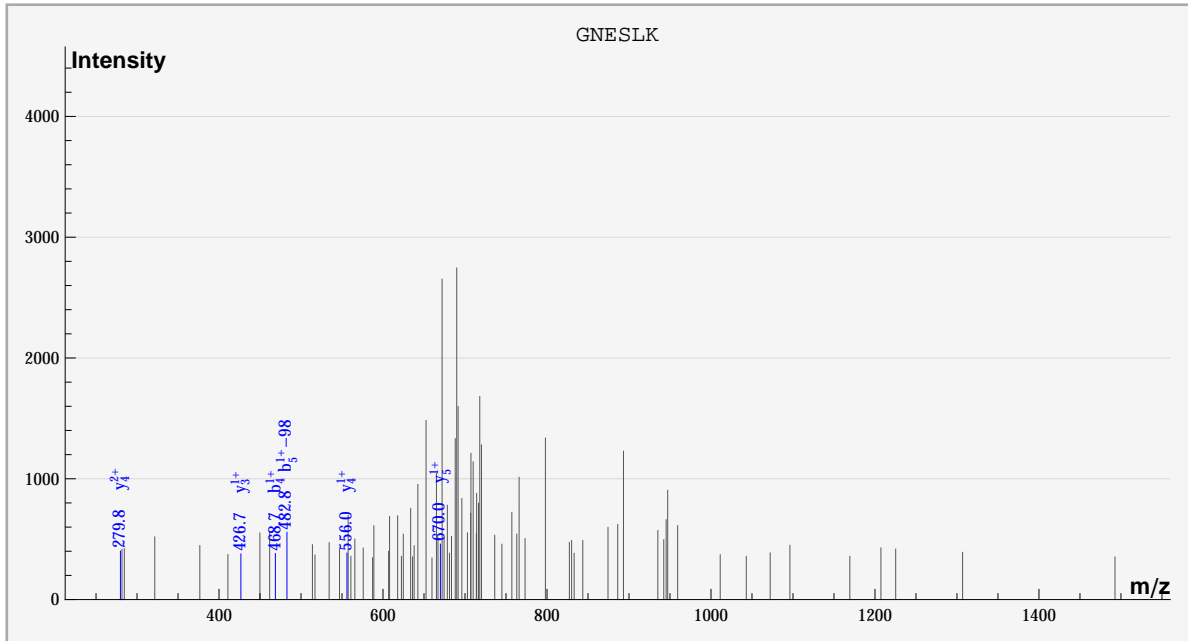

|   | # | b | b* | # | y | y* | P | P* |
|---|---|---|----|---|---|----|---|----|
| G | 1 |   |    |   |   |    |   |    |
| N | 2 |   |    | 5 | ✓ |    |   |    |
| E | 3 |   |    | 4 | ✓ |    |   |    |
| S | 4 | ✓ |    | 3 | ✓ |    |   |    |
| L | 5 |   | ✓  | 2 |   |    |   |    |
| K | 6 |   |    | 1 |   |    |   |    |

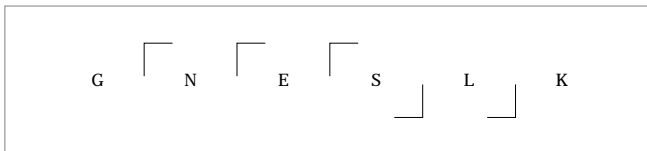

dbValid true ETQDMLLKYR PHOS(2) 2. 729. -0.199233 5.41281 100. ? 2310.  
 S\_Acido\_new%gi|68568724|gb|AAy81653.1| ETQDMLLKYR%::PHOS:::PHOS::%sample\_1%compd\_977

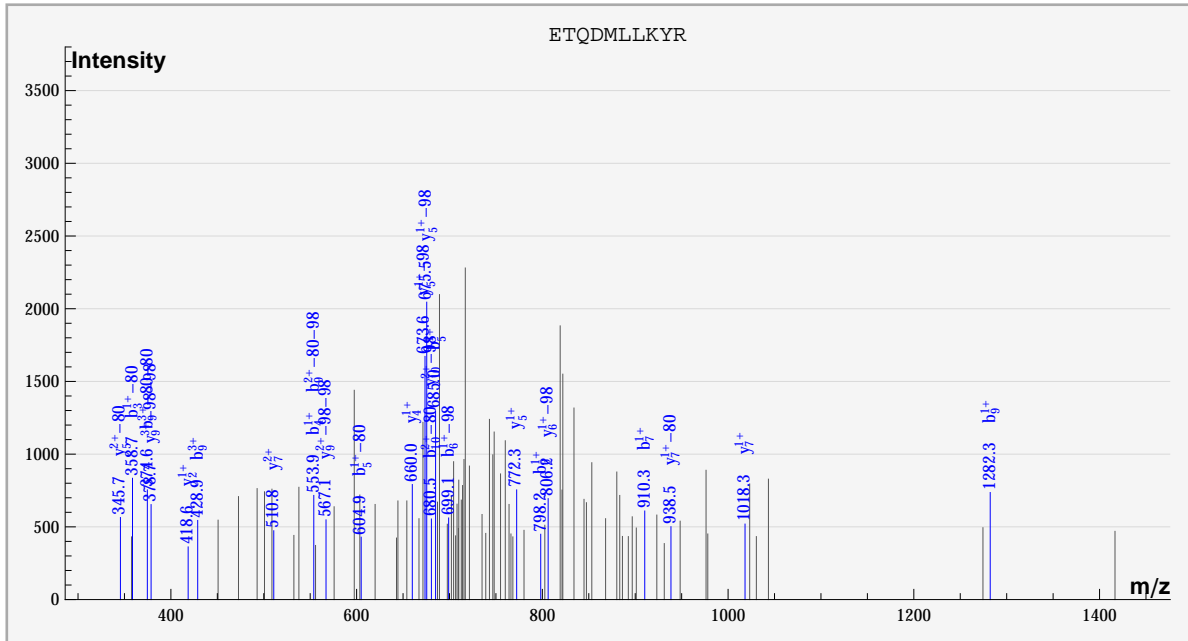

|   | #  | b | b* | # | y | y* | P | P* |
|---|----|---|----|---|---|----|---|----|
| E | 1  |   |    |   |   |    |   | ✓  |
| T | 2  |   |    | 9 |   | ✓  |   |    |
| Q | 3  | ✓ |    | 8 |   |    |   |    |
| D | 4  | ✓ | ✓  | 7 | ✓ | ✓  |   |    |
| M | 5  | ✓ | ✓  | 6 | ✓ | ✓  |   |    |
| L | 6  | ✓ | ✓  | 5 | ✓ | ✓  |   |    |
| L | 7  | ✓ |    | 4 | ✓ |    |   |    |
| K | 8  |   |    | 3 |   |    |   |    |
| Y | 9  | ✓ | ✓  | 2 | ✓ |    |   |    |
| R | 10 |   | ✓  | 1 |   |    |   |    |

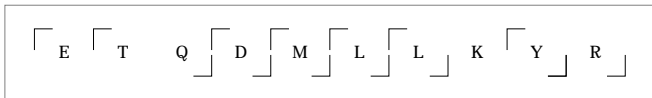

dbValid true YYKASEESIK PHOS(3) 2. 729. 0.255512 5.0741 100. ? 504.

S\_Acido\_new%gi|68568552|gb|AAY81481.1| YYKASEESIK%:PHOS:PHOS:::::PHOS:::sample\_1%compd\_3405

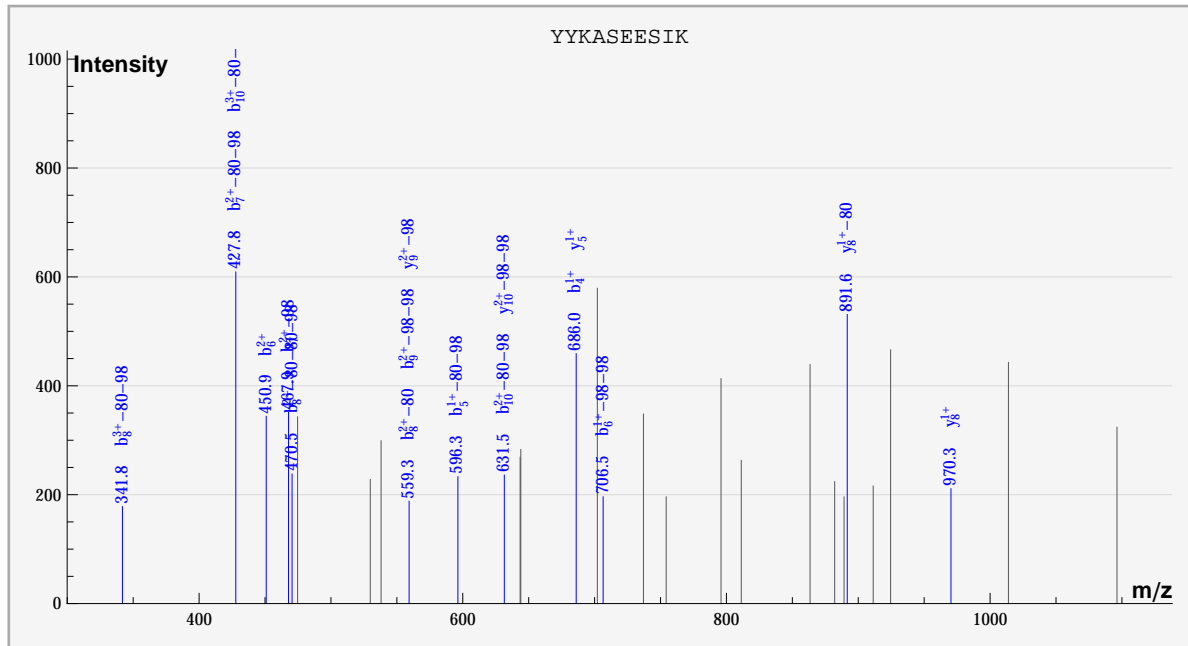

|   | #  | b | b* | # | y | y* | P | P* |
|---|----|---|----|---|---|----|---|----|
| Y | 1  |   |    |   |   |    |   | ✓  |
| Y | 2  |   |    | 9 |   | ✓  |   |    |
| K | 3  |   |    | 8 | ✓ | ✓  |   |    |
| A | 4  | ✓ |    | 7 |   |    |   |    |
| S | 5  |   | ✓  | 6 |   |    |   |    |
| E | 6  | ✓ | ✓  | 5 | ✓ |    |   |    |
| E | 7  |   | ✓  | 4 |   |    |   |    |
| S | 8  |   | ✓  | 3 | ✓ |    |   |    |
| I | 9  |   | ✓  | 2 |   |    |   |    |
| K | 10 |   | ✓  | 1 |   |    |   |    |

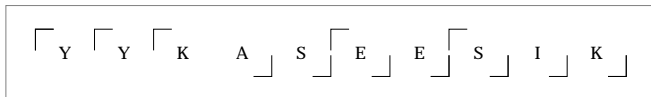



dbValid true KIDENYILSRK PHOS(1) 2. 731. -1.12877 5.02083 100. ? 1458.  
 S\_Acido\_new%gi|68566551|gb|AA79480.1| KIDENYILSRK%:.....PHOS:::sample\_2%compd\_183

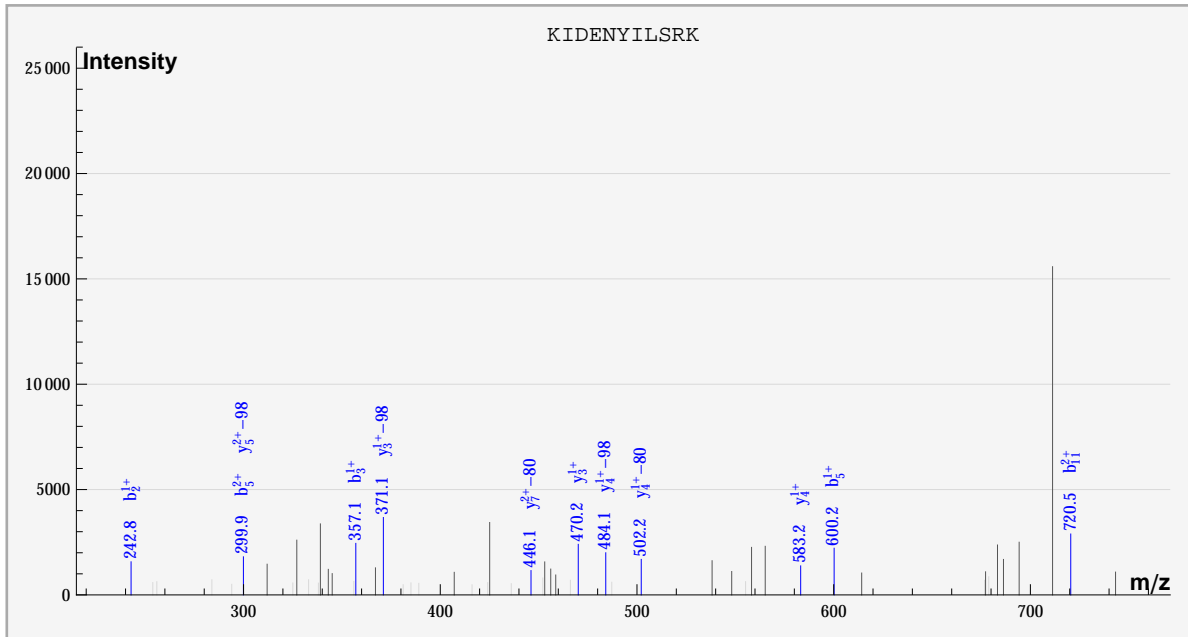

|   | #  | b | b* | #  | y | y* | P | P* |
|---|----|---|----|----|---|----|---|----|
| K | 1  |   |    |    |   |    |   |    |
| I | 2  | ✓ |    | 10 |   |    |   |    |
| D | 3  | ✓ |    | 9  |   |    |   |    |
| E | 4  |   |    | 8  |   |    |   |    |
| N | 5  | ✓ |    | 7  |   | ✓  |   |    |
| Y | 6  |   |    | 6  |   |    |   |    |
| I | 7  |   |    | 5  |   | ✓  |   |    |
| L | 8  |   |    | 4  | ✓ | ✓  |   |    |
| S | 9  |   |    | 3  | ✓ | ✓  |   |    |
| R | 10 |   |    | 2  |   |    |   |    |
| K | 11 | ✓ |    | 1  |   |    |   |    |

K I D E N Y I L S R K

dbValid true GGESFR PHOS(1) 1. 731. 1.27122 5.4238 100. ? 2046.  
 S\_Acido\_new%gi|68567565|gb|AAY80494.1| GGESFR%:::PHOS:::sample\_0%compd\_725

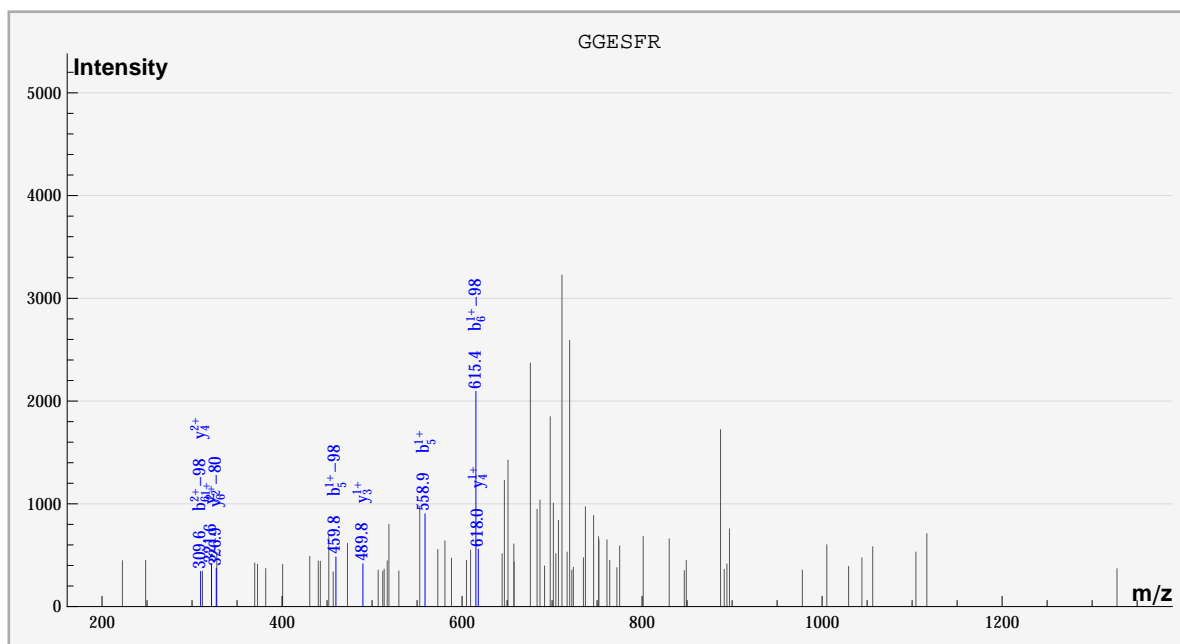

|   | # | b | b* | # | y | y* | P | P* |
|---|---|---|----|---|---|----|---|----|
| G | 1 |   |    |   |   |    |   | ✓  |
| G | 2 |   |    | 5 |   |    |   |    |
| E | 3 |   |    | 4 | ✓ |    |   |    |
| S | 4 |   |    | 3 | ✓ |    |   |    |
| F | 5 | ✓ | ✓  | 2 | ✓ |    |   |    |
| R | 6 |   | ✓  | 1 |   |    |   |    |

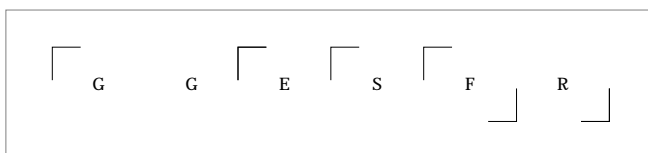

dbValid true SSNTLK PHOS(1) 1. 731. -1.68216 4.99479 100. ? 2466.  
 S\_Acido\_new%gi|68566672|gb|AAY79601.1| SSNTLK%::::PHOS:::sample\_2%compd\_1045

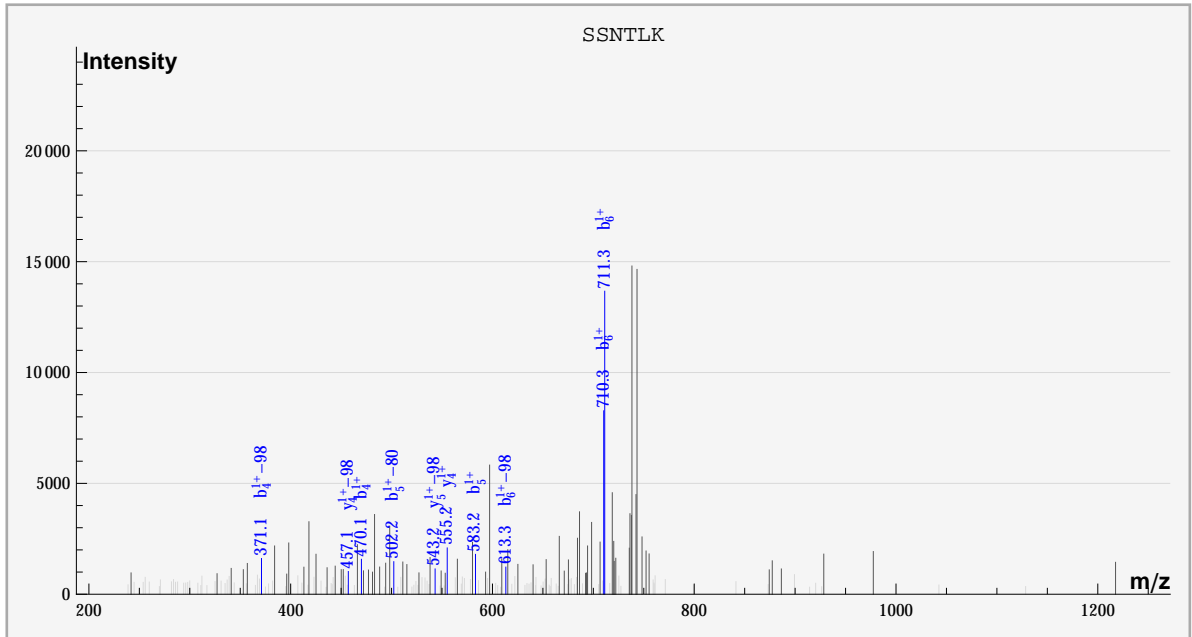

|   | # | b | b* | # | y | y* | P | P* |
|---|---|---|----|---|---|----|---|----|
| S | 1 |   |    |   |   |    |   |    |
| S | 2 |   |    | 5 |   | ✓  |   |    |
| N | 3 |   |    | 4 | ✓ | ✓  |   |    |
| T | 4 | ✓ | ✓  | 3 |   |    |   |    |
| L | 5 | ✓ | ✓  | 2 |   |    |   |    |
| K | 6 | ✓ | ✓  | 1 |   |    |   |    |

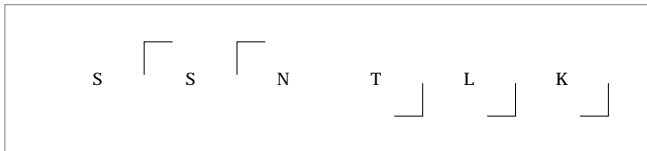

dbValid true YDIAIALYAER PHOS(2) 2. 731. -1.69073 5.13232 100. ? 2928.

S\_Acido\_new%gi|68568419|gb|AA81348.1| YDIAIALYAER%:PHOS:::PHOS:::sample\_2%compd\_1415

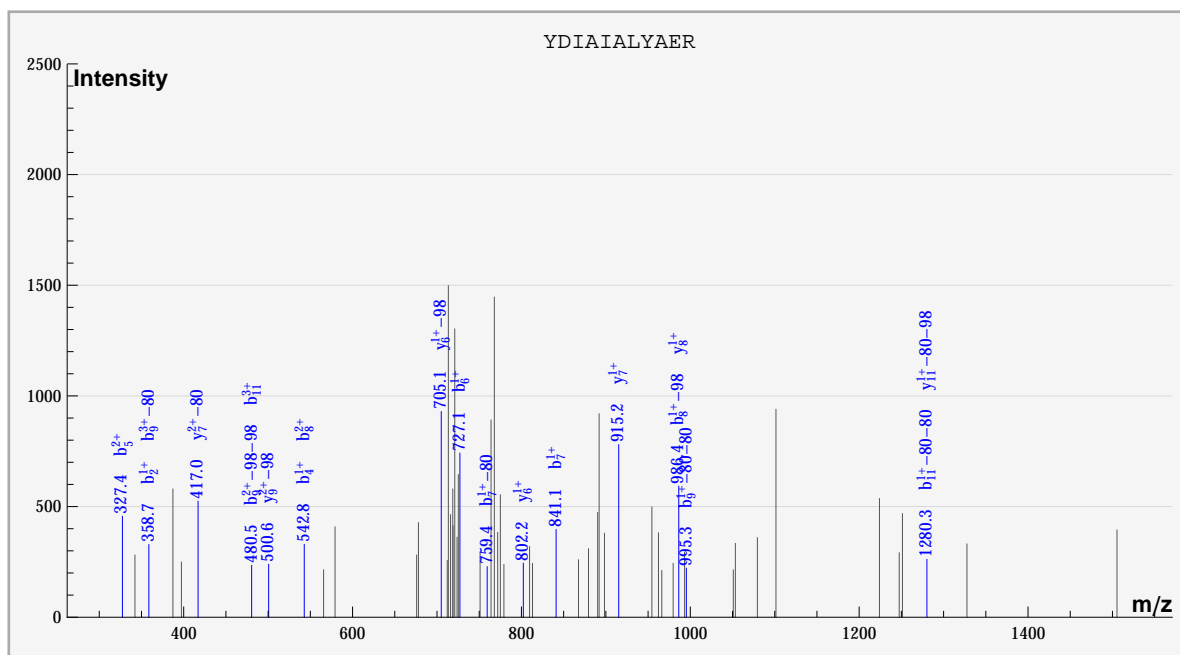

|   | #  | b | b* | #  | y | y* | P | P* |
|---|----|---|----|----|---|----|---|----|
| Y | 1  |   |    |    |   |    |   | ✓  |
| D | 2  | ✓ |    | 10 |   |    |   |    |
| I | 3  |   |    | 9  |   | ✓  |   |    |
| A | 4  | ✓ |    | 8  | ✓ |    |   |    |
| I | 5  | ✓ |    | 7  | ✓ | ✓  |   |    |
| A | 6  | ✓ |    | 6  | ✓ | ✓  |   |    |
| L | 7  | ✓ | ✓  | 5  |   |    |   |    |
| Y | 8  | ✓ | ✓  | 4  |   |    |   |    |
| A | 9  |   | ✓  | 3  |   |    |   |    |
| E | 10 |   |    | 2  |   |    |   |    |
| R | 11 | ✓ | ✓  | 1  |   |    |   |    |

Y D I A I A L Y A E R

dbValid true SYIQGNDNRK PHOS(3) 2. 731. -1.76963 5.15584 100. ? 3036.

S\_Acido\_new%gi|68567205|gb|AAV80134.1| SYIQGNDNRK%:PHOS:PHOS:::PHOS:::sample\_0%cmpd\_1632

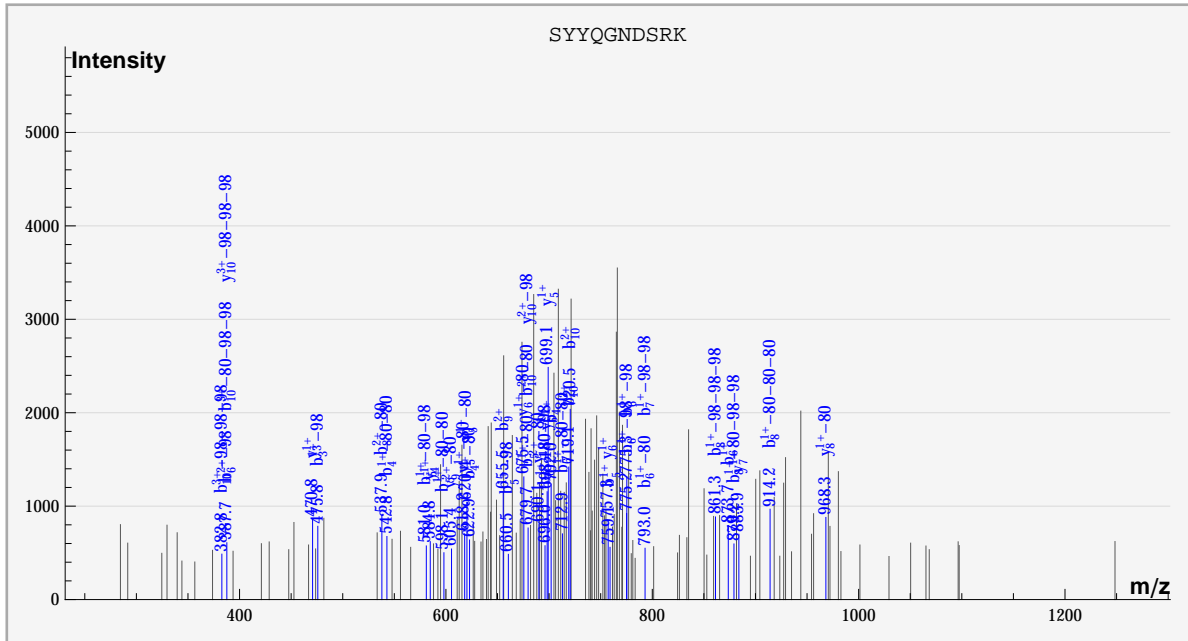

|   | #  | b | b* | # | y | y* | P | P* |
|---|----|---|----|---|---|----|---|----|
| S | 1  |   |    |   |   |    |   | ✓  |
| Y | 2  |   |    | 9 |   | ✓  |   |    |
| Y | 3  |   | ✓  | 8 |   | ✓  |   |    |
| Q | 4  | ✓ | ✓  | 7 | ✓ |    |   |    |
| G | 5  | ✓ | ✓  | 6 | ✓ | ✓  |   |    |
| N | 6  | ✓ | ✓  | 5 | ✓ | ✓  |   |    |
| D | 7  |   | ✓  | 4 | ✓ |    |   |    |
| S | 8  |   | ✓  | 3 | ✓ |    |   |    |
| R | 9  | ✓ |    | 2 |   |    |   |    |
| K | 10 | ✓ | ✓  | 1 |   |    |   |    |

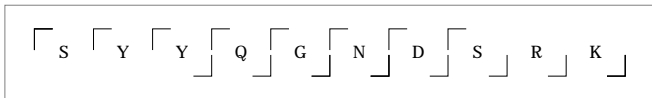

dbValid true GAASGMR PHOS(1) 1. 731. -1.72508 5.27435 100. ? 3486.  
 S\_Acido\_new%gi|68568331|gb|AAY81260.1|S\_Acido\_new%gi|68568476|gb|AAY81405.1|  
 GAASGMR%::::PHOS::::%sample\_0%compd\_2042

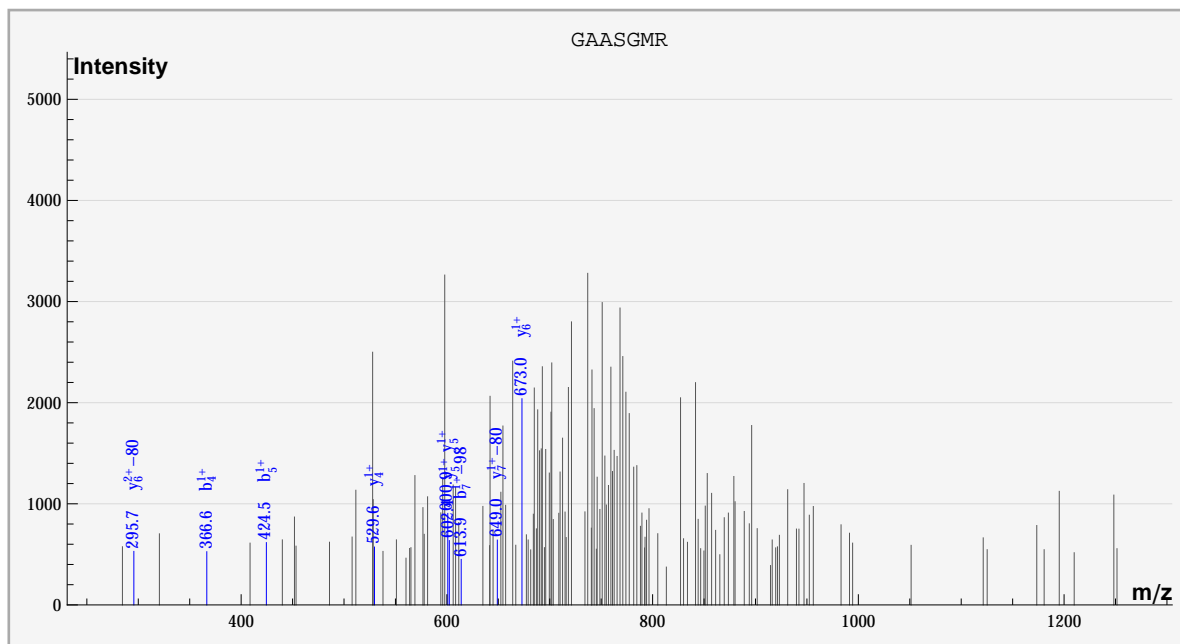

|   | # | b | b* | # | y | y* | P | P* |
|---|---|---|----|---|---|----|---|----|
| G | 1 |   |    |   |   |    |   | ✓  |
| A | 2 |   |    | 6 | ✓ | ✓  |   |    |
| A | 3 |   |    | 5 | ✓ |    |   |    |
| S | 4 | ✓ |    | 4 | ✓ |    |   |    |
| G | 5 | ✓ |    | 3 |   |    |   |    |
| M | 6 |   |    | 2 |   |    |   |    |
| R | 7 |   | ✓  | 1 |   |    |   |    |

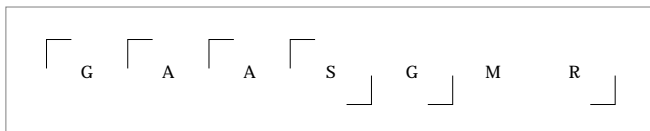

dbValid true MKAVILAGGYGKR Oxidation\_M(1),PHOS(1) 2. 732. -1.62184 5.34949 100. ? 1800.  
 S\_Acido\_new%gil68567675|gb|AAY80604.1| MKAVILAGGYGKR%:Oxidation\_M:.....PHOS:....%sample\_0%compd\_505

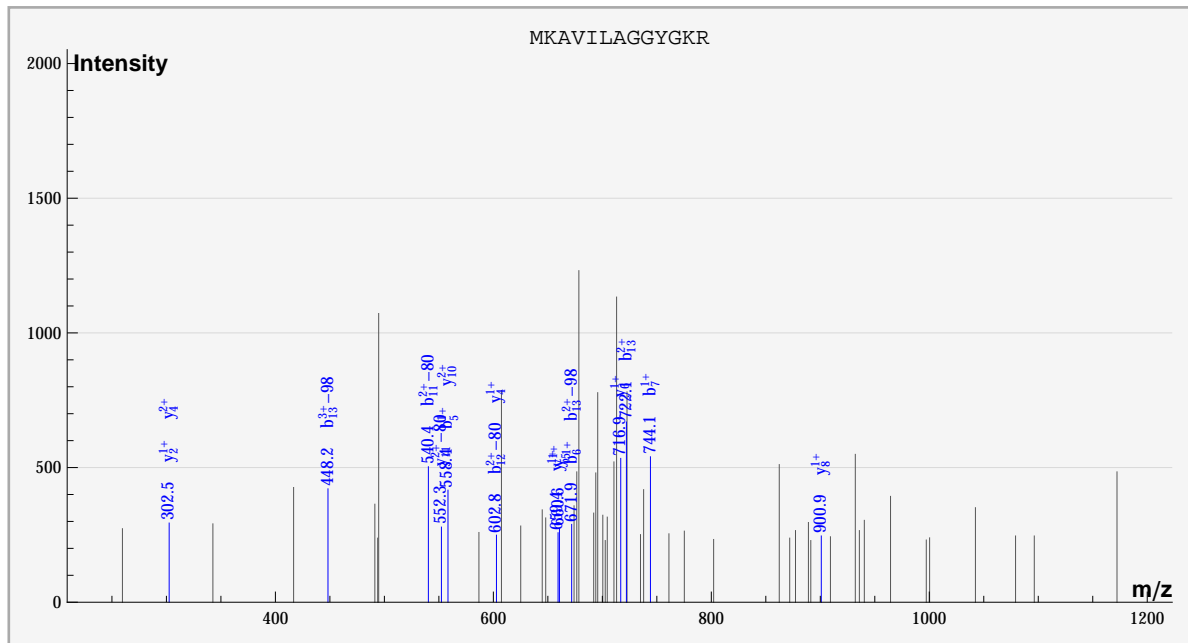

|   | #  | b | b* | #  | y | y* | P | P* |
|---|----|---|----|----|---|----|---|----|
| M | 1  |   |    |    |   |    |   |    |
| K | 2  |   |    | 12 |   |    |   |    |
| A | 3  |   |    | 11 |   | ✓  |   |    |
| V | 4  |   |    | 10 | ✓ |    |   |    |
| I | 5  | ✓ |    | 9  |   |    |   |    |
| L | 6  | ✓ |    | 8  | ✓ |    |   |    |
| A | 7  | ✓ |    | 7  |   |    |   |    |
| G | 8  |   |    | 6  | ✓ |    |   |    |
| G | 9  |   |    | 5  | ✓ |    |   |    |
| Y | 10 |   |    | 4  | ✓ |    |   |    |
| G | 11 |   | ✓  | 3  |   |    |   |    |
| K | 12 |   | ✓  | 2  |   | ✓  |   |    |
| R | 13 | ✓ | ✓  | 1  |   |    |   |    |

M K [A [V I [L [A [G [G [Y G [K [R ]]

dbValid true FHTTNQEKSK PHOS(3) 2. 732. -1.74362 5.48285 100. ? 2646.  
 S\_Acido\_new%gi|68568348|gb|AAy81277.1| FHTTNQEKSK%:::PHOS:PHOS:::PHOS::%sample\_2%cmpd\_1200

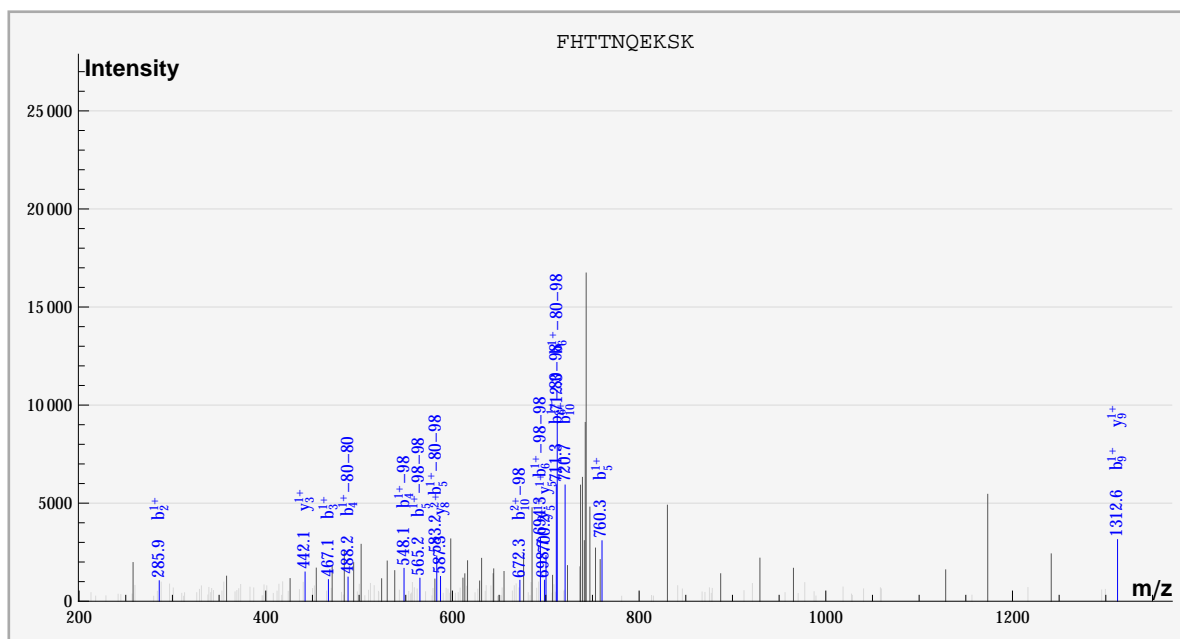

|   | #  | b | b* | # | y | y* | P | P* |
|---|----|---|----|---|---|----|---|----|
| F | 1  |   |    |   |   |    |   |    |
| H | 2  | ✓ |    | 9 | ✓ |    |   |    |
| T | 3  | ✓ |    | 8 | ✓ |    |   |    |
| T | 4  |   | ✓  | 7 |   |    |   |    |
| N | 5  | ✓ | ✓  | 6 |   |    |   |    |
| Q | 6  |   | ✓  | 5 | ✓ |    |   |    |
| E | 7  |   |    | 4 |   |    |   |    |
| K | 8  |   |    | 3 | ✓ |    |   |    |
| S | 9  | ✓ |    | 2 |   |    |   |    |
| K | 10 | ✓ | ✓  | 1 |   |    |   |    |

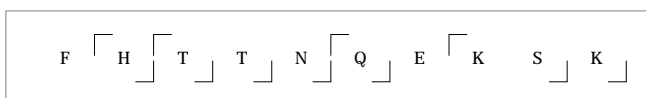



dbValid true FHTTNQEKSK PHOS(3) 2. 732. -1.74362 5.3555 100. ? 2658.

S\_Acido\_new%gi|68568348|gb|AAy81277.1| FHTTNQEKSK%:::PHOS:PHOS:::PHOS::%sample\_2%cmpd\_1211

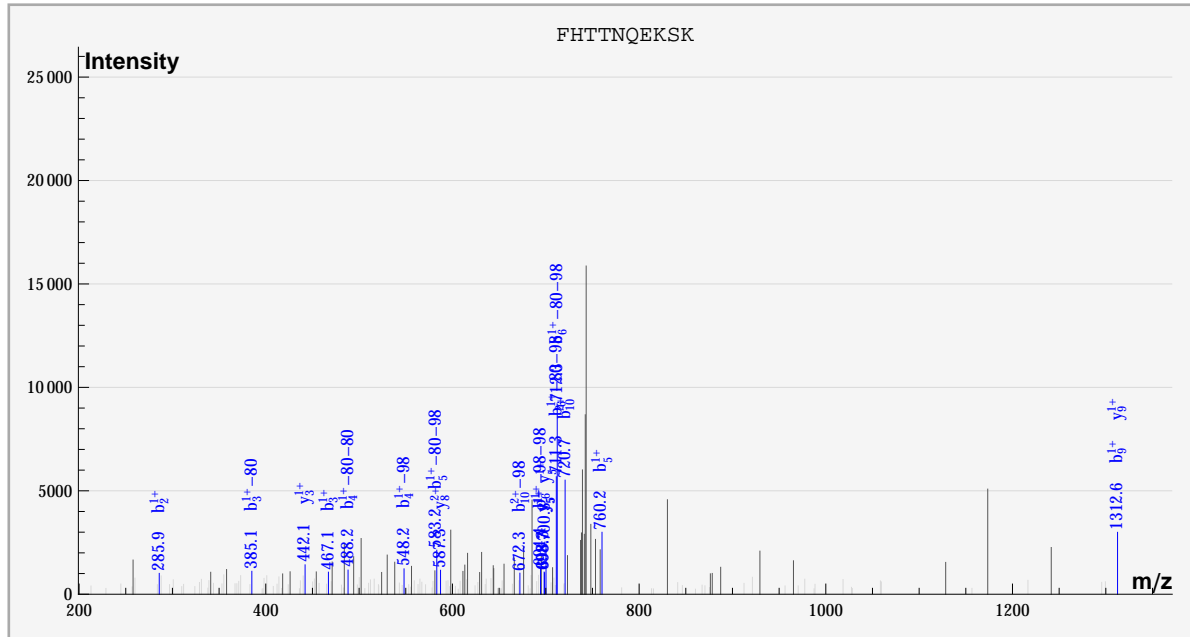

|   | #  | b | b* | # | y | y* | P | P* |
|---|----|---|----|---|---|----|---|----|
| F | 1  |   |    |   |   |    |   |    |
| H | 2  | ✓ |    | 9 | ✓ |    |   |    |
| T | 3  | ✓ | ✓  | 8 | ✓ |    |   |    |
| T | 4  |   | ✓  | 7 |   |    |   |    |
| N | 5  | ✓ | ✓  | 6 |   |    |   |    |
| Q | 6  |   | ✓  | 5 | ✓ |    |   |    |
| E | 7  |   |    | 4 |   |    |   |    |
| K | 8  |   |    | 3 | ✓ |    |   |    |
| S | 9  | ✓ |    | 2 |   |    |   |    |
| K | 10 | ✓ | ✓  | 1 |   |    |   |    |

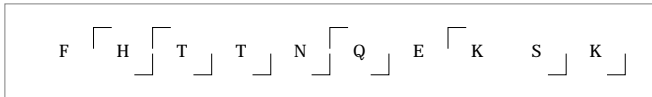

dbValid true FHTTNQEKSK PHOS(3) 2. 732. -1.74362 5.50943 100. ? 2670.  
 S\_Acido\_new%gi|68568348|gb|AA81277.1| FHTTNQEKSK%::PHOS:PHOS:::PHOS::%sample\_2%cmpd\_1221

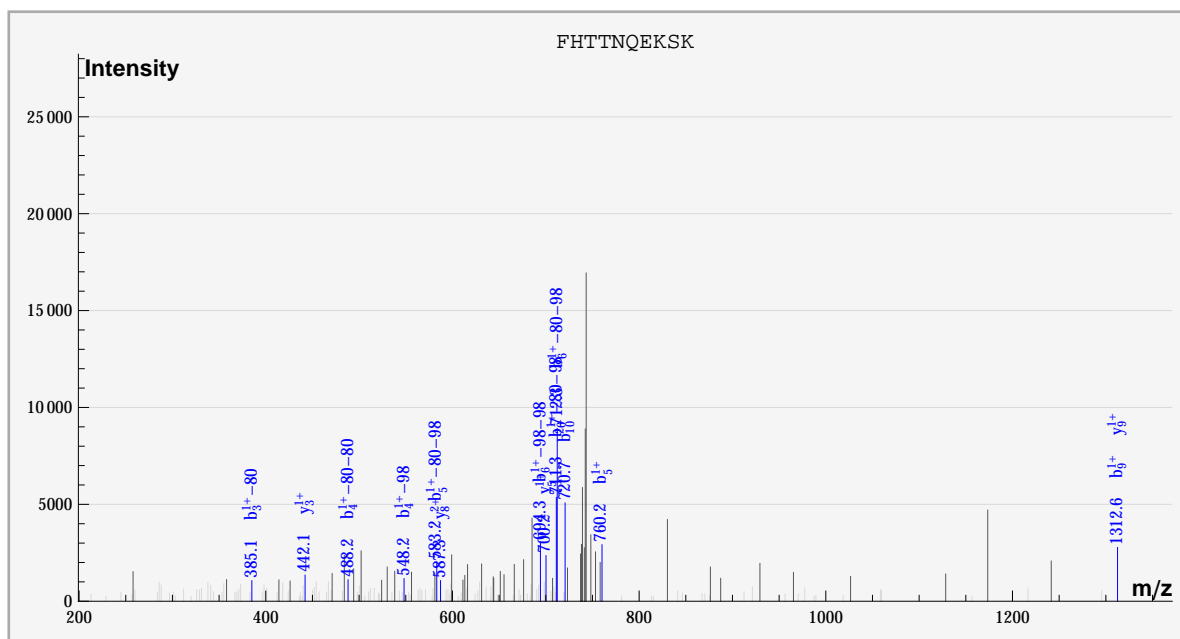

|   | #  | b | b* | # | y | y* | P | P* |
|---|----|---|----|---|---|----|---|----|
| F | 1  |   |    |   |   |    |   |    |
| H | 2  |   |    | 9 | ✓ |    |   |    |
| T | 3  | ✓ |    | 8 | ✓ |    |   |    |
| T | 4  | ✓ |    | 7 |   |    |   |    |
| N | 5  | ✓ | ✓  | 6 |   |    |   |    |
| Q | 6  | ✓ |    | 5 | ✓ |    |   |    |
| E | 7  |   |    | 4 |   |    |   |    |
| K | 8  |   |    | 3 | ✓ |    |   |    |
| S | 9  | ✓ |    | 2 |   |    |   |    |
| K | 10 | ✓ |    | 1 |   |    |   |    |

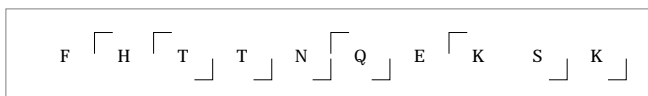



dbValid true AFQSAK PHOS(1) 1. 733. -1.68765 7.12017 100. ? 1788.  
 S\_Acido\_new%gi|68568585|gb|AAY81514.1| AFQSAK%:::PHOS:::sample\_0%compd\_495

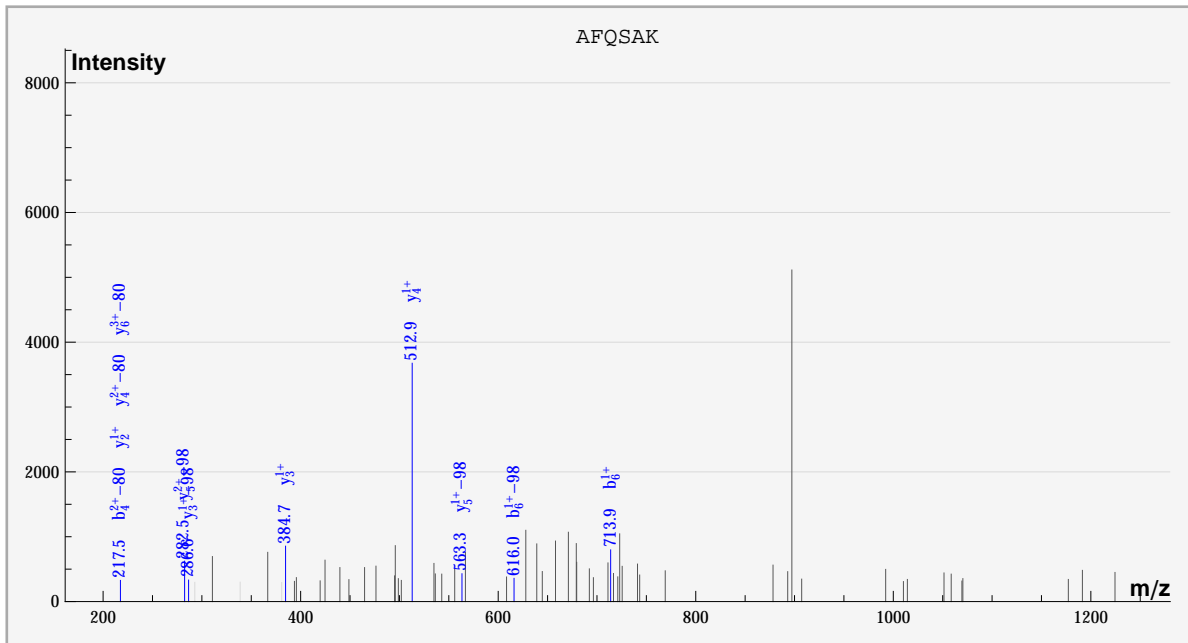

|   | # | b | b* | # | y | y* | P | P* |
|---|---|---|----|---|---|----|---|----|
| A | 1 |   |    |   |   |    |   | ✓  |
| F | 2 |   |    | 5 |   | ✓  |   |    |
| Q | 3 |   |    | 4 | ✓ | ✓  |   |    |
| S | 4 | ✓ |    | 3 | ✓ | ✓  |   |    |
| A | 5 |   |    | 2 | ✓ |    |   |    |
| K | 6 | ✓ | ✓  | 1 |   |    |   |    |

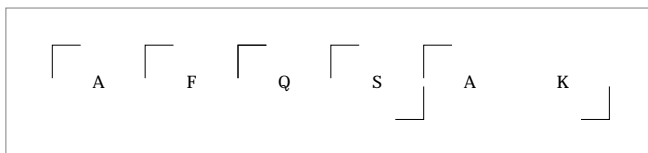

dbValid true DLRLEGGHSSRR PHOS(1) 2. 733. -1.15085 5.78997 100. ? 2430.  
 S\_Acido\_new%gi|68567016|gb|AA79945.1| DLRLEGGHSSRR%:::PHOS:::sample\_2%compd\_1017

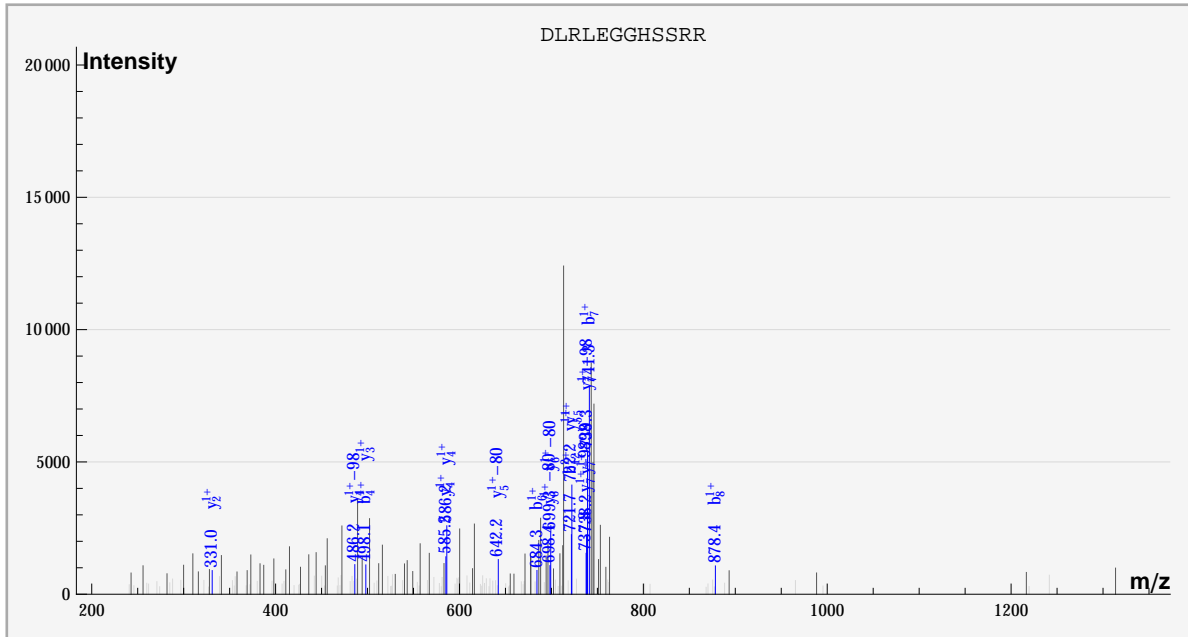

|   | #  | b | b* | #  | y | y* | P | P* |
|---|----|---|----|----|---|----|---|----|
| D | 1  |   |    |    |   |    |   |    |
| L | 2  |   |    | 11 |   |    |   |    |
| R | 3  |   |    | 10 |   |    |   |    |
| L | 4  | ✓ |    | 9  |   |    |   |    |
| E | 5  |   |    | 8  |   |    |   |    |
| G | 6  | ✓ |    | 7  |   | ✓  |   |    |
| G | 7  | ✓ |    | 6  |   | ✓  |   |    |
| H | 8  | ✓ |    | 5  | ✓ | ✓  |   |    |
| S | 9  |   |    | 4  | ✓ | ✓  |   |    |
| S | 10 |   |    | 3  | ✓ |    |   |    |
| R | 11 |   |    | 2  | ✓ |    |   |    |
| R | 12 | ✓ |    | 1  |   |    |   |    |

D L R L E G G H S S R R

dbValid true DLRLEGGHSSRR PHOS(1) 2. 733. -1.15085 5.77207 100. ? 2454.  
 S\_Acido\_new%gi|68567016|gb|AA79945.1| DLRLEGGHSSRR%:::PHOS:::sample\_2%compd\_1037

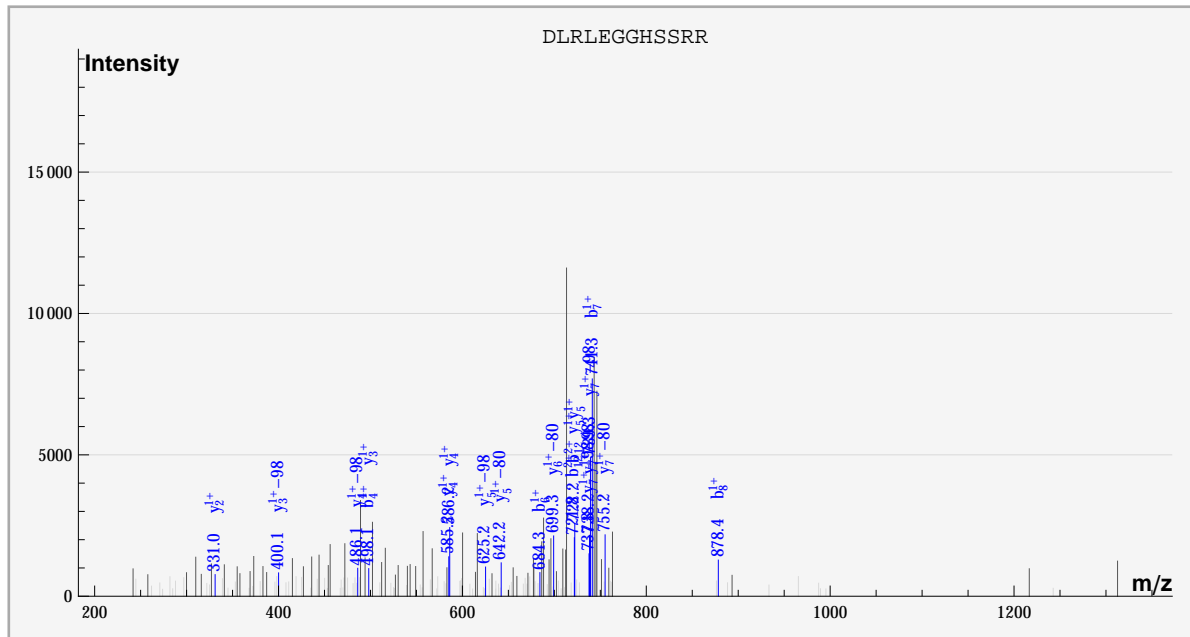

|   | #  | b | b* | #  | y | y* | P | P* |
|---|----|---|----|----|---|----|---|----|
| D | 1  |   |    |    |   |    |   |    |
| L | 2  |   |    | 11 |   |    |   |    |
| R | 3  |   |    | 10 |   |    |   |    |
| L | 4  | ✓ |    | 9  |   |    |   |    |
| E | 5  |   |    | 8  |   |    |   |    |
| G | 6  | ✓ |    | 7  |   | ✓  |   |    |
| G | 7  | ✓ |    | 6  |   | ✓  |   |    |
| H | 8  | ✓ |    | 5  | ✓ | ✓  |   |    |
| S | 9  |   |    | 4  | ✓ | ✓  |   |    |
| S | 10 |   |    | 3  | ✓ | ✓  |   |    |
| R | 11 |   |    | 2  | ✓ |    |   |    |
| R | 12 | ✓ |    | 1  |   |    |   |    |

D L R L E G G H S S R R

dbValid true GMKTSK PHOS(1) 1. 733. -1.68427 5.09739 100. ? 2784.

S\_Acido\_new%gi|68566883|gb|AAY79812.1| GMKTSK%:::::PHOS:::sample\_0%compd\_1402

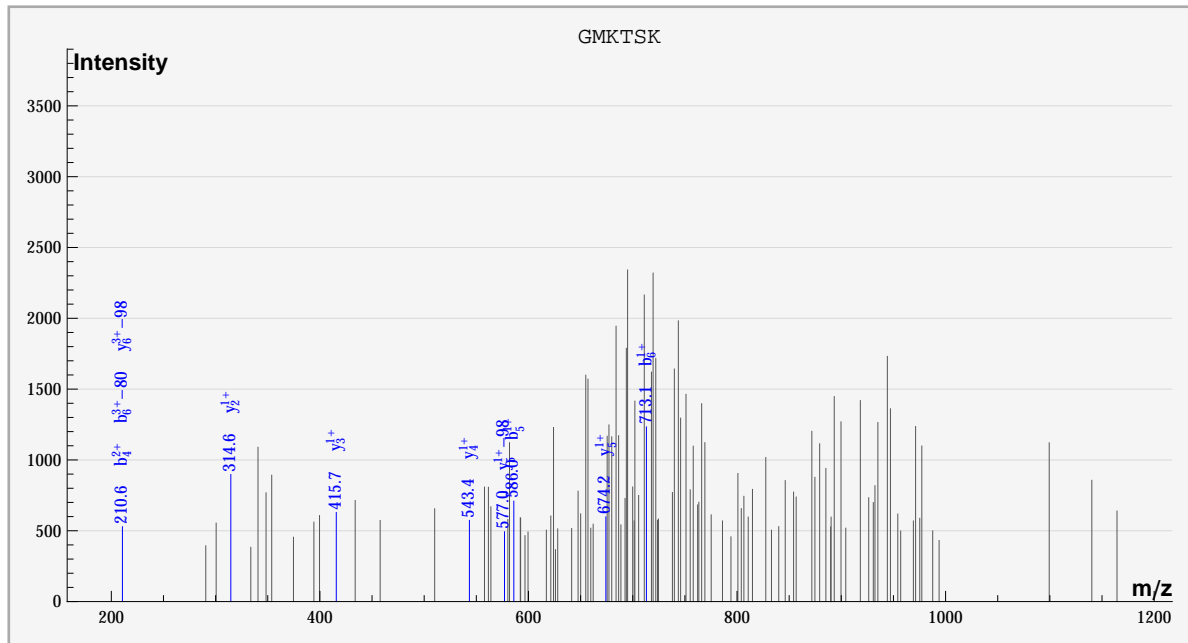

|   | # | b | b* | # | y | y* | P | P* |
|---|---|---|----|---|---|----|---|----|
| G | 1 |   |    |   |   |    |   | ✓  |
| M | 2 |   |    | 5 | ✓ | ✓  |   |    |
| K | 3 |   |    | 4 | ✓ |    |   |    |
| T | 4 | ✓ |    | 3 | ✓ |    |   |    |
| S | 5 | ✓ |    | 2 | ✓ |    |   |    |
| K | 6 | ✓ | ✓  | 1 |   |    |   |    |

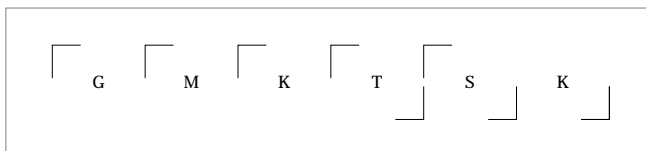

dbValid true DLRLEGGHSSRR PHOS(1) 2. 733. -1.15085 5.07006 100. ? 3030.  
 S\_Acido\_new%gi|68567016|gb|AAY79945.1| DLRLEGGHSSRR%:::PHOS:::sample\_2%compd\_1528

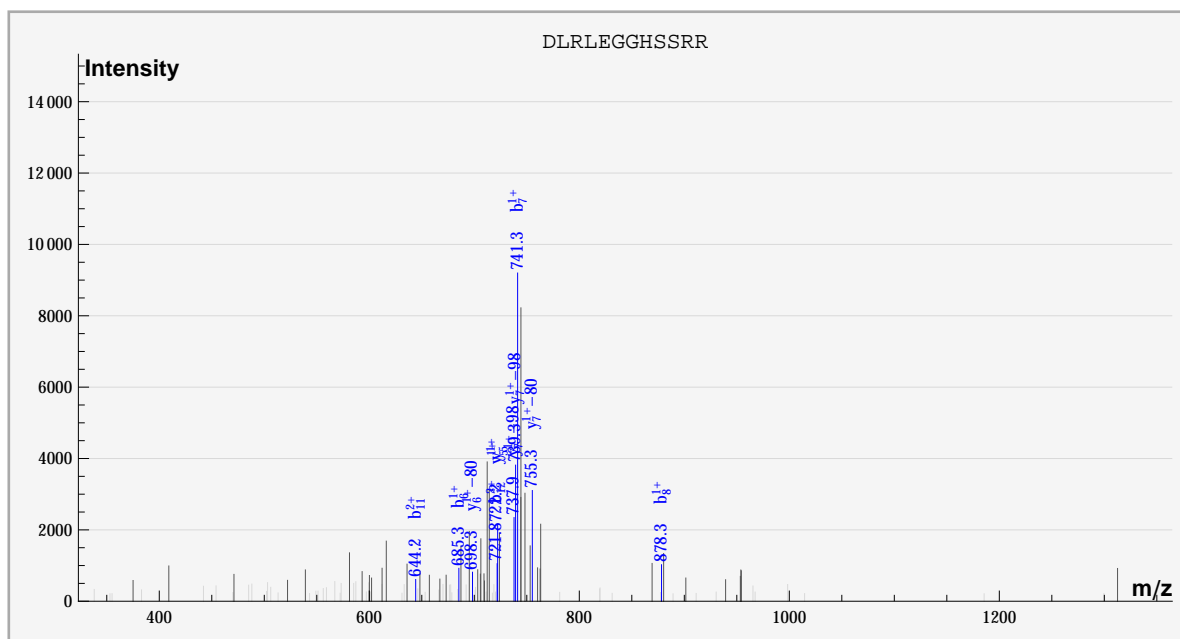

|   | #  | b | b* | #  | y | y* | P | P* |
|---|----|---|----|----|---|----|---|----|
| D | 1  |   |    |    |   |    |   |    |
| L | 2  |   |    | 11 |   |    |   |    |
| R | 3  |   |    | 10 |   |    |   |    |
| L | 4  |   |    | 9  |   |    |   |    |
| E | 5  |   |    | 8  |   |    |   |    |
| G | 6  | ✓ |    | 7  |   | ✓  |   |    |
| G | 7  | ✓ |    | 6  |   | ✓  |   |    |
| H | 8  | ✓ |    | 5  | ✓ |    |   |    |
| S | 9  |   |    | 4  |   |    |   |    |
| S | 10 |   |    | 3  |   |    |   |    |
| R | 11 | ✓ |    | 2  |   |    |   |    |
| R | 12 | ✓ |    | 1  |   |    |   |    |

D L R L E [ G ] [ G ] [ H ] S S R ] R ]



dbValid true DLRLEGGHSSRR PHOS(1) 2. 733. -1.15085 5.46548 100. ? 3120.  
 S\_Acido\_new%gi|68567016|gb|AA79945.1| DLRLEGGHSSRR%:::PHOS:::sample\_2%compd\_1599

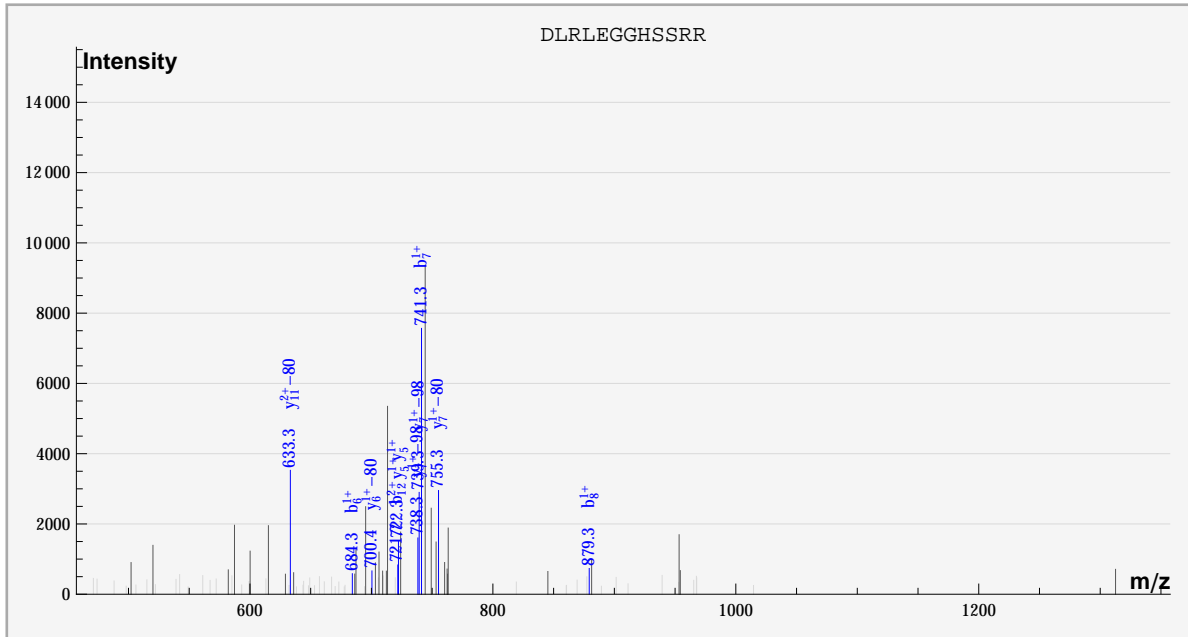

|   | #  | b | b* | #  | y | y* | P | P* |
|---|----|---|----|----|---|----|---|----|
| D | 1  |   |    |    |   |    |   |    |
| L | 2  |   |    | 11 |   | ✓  |   |    |
| R | 3  |   |    | 10 |   |    |   |    |
| L | 4  |   |    | 9  |   |    |   |    |
| E | 5  |   |    | 8  |   |    |   |    |
| G | 6  | ✓ |    | 7  |   | ✓  |   |    |
| G | 7  | ✓ |    | 6  |   | ✓  |   |    |
| H | 8  | ✓ |    | 5  | ✓ |    |   |    |
| S | 9  |   |    | 4  |   |    |   |    |
| S | 10 |   |    | 3  |   |    |   |    |
| R | 11 |   |    | 2  |   |    |   |    |
| R | 12 | ✓ |    | 1  |   |    |   |    |

D [ L R L E [ G [ G [ H ] S S R R ]

dbValid true YMLLDITKLLK Oxidation\_M(1),PHOS(1) 2. 733. -1.60705 5.1329 100. ? 3192.  
 S\_Acido\_new%gil68567207|gb|AAY80136.1| YMLLDITKLLK%:PHOS:Oxidation\_M:.....:sample\_2%cmpd\_1643

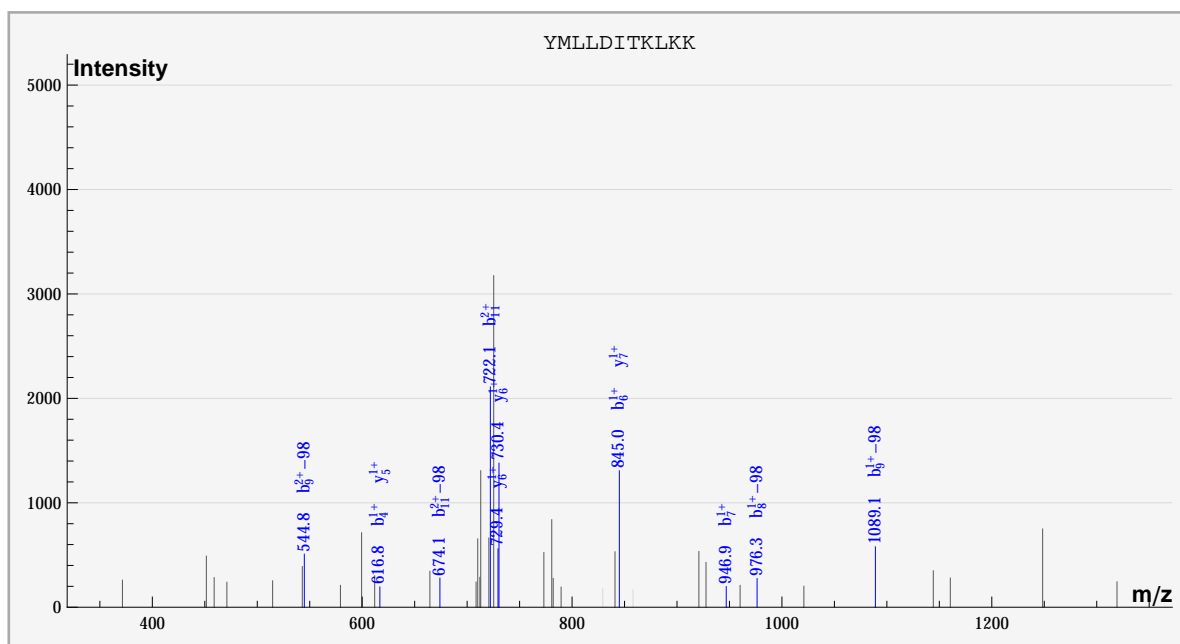

|   | #  | b | b* | #  | y | y* | P | P* |
|---|----|---|----|----|---|----|---|----|
| Y | 1  |   |    |    |   |    |   |    |
| M | 2  |   |    | 10 |   |    |   |    |
| L | 3  |   |    | 9  |   |    |   |    |
| L | 4  | ✓ |    | 8  |   |    |   |    |
| D | 5  |   |    | 7  | ✓ |    |   |    |
| I | 6  | ✓ |    | 6  | ✓ |    |   |    |
| T | 7  | ✓ |    | 5  | ✓ |    |   |    |
| K | 8  |   | ✓  | 4  |   |    |   |    |
| L | 9  |   | ✓  | 3  |   |    |   |    |
| K | 10 |   |    | 2  |   |    |   |    |
| K | 11 | ✓ | ✓  | 1  |   |    |   |    |

Y M L L D I T K L K K

dbValid true VKTTGAVIDIITR PHOS(1) 2. 733. 0.902527 5.11439 100. ? 3354.  
 S\_Acido\_new%gi|68568580|gb|AAy81509.1| VKTTGAVIDIITR%:.....PHOS::%sample\_0%cmpd\_1923

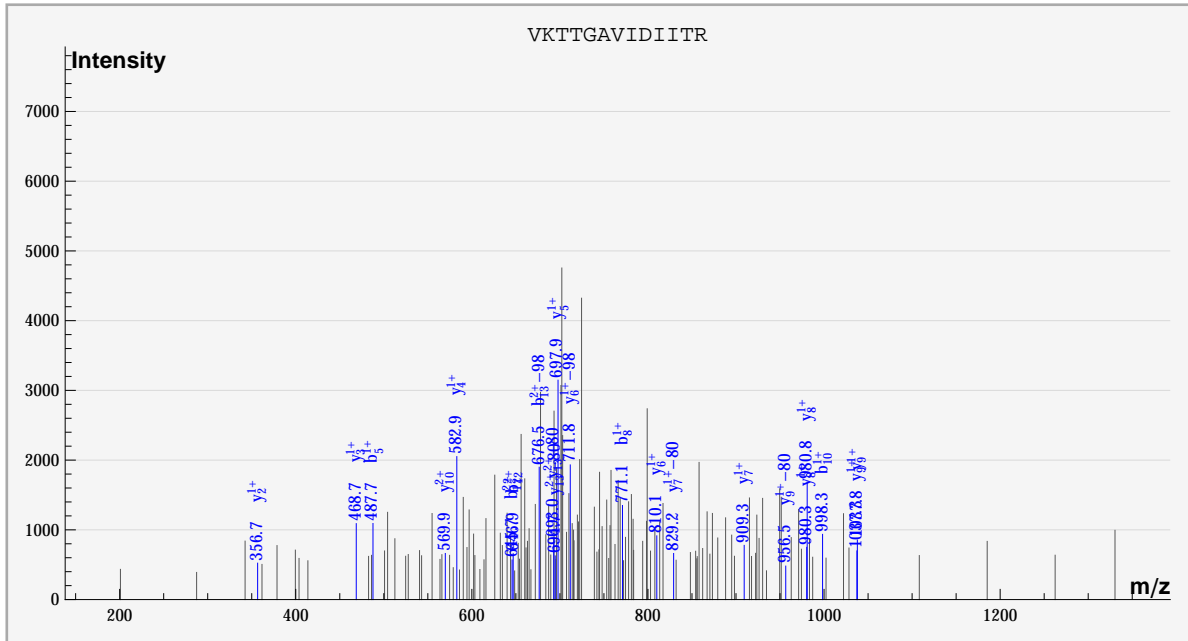

|   | #  | b | b* | #  | y | y* | P | P* |
|---|----|---|----|----|---|----|---|----|
| V | 1  |   |    |    |   |    |   | ✓  |
| K | 2  |   |    | 12 |   |    |   |    |
| T | 3  |   |    | 11 |   |    |   |    |
| T | 4  |   |    | 10 | ✓ |    |   |    |
| G | 5  | ✓ |    | 9  | ✓ | ✓  |   |    |
| A | 6  |   |    | 8  | ✓ |    |   |    |
| V | 7  |   |    | 7  | ✓ | ✓  |   |    |
| I | 8  | ✓ |    | 6  | ✓ | ✓  |   |    |
| D | 9  |   |    | 5  | ✓ |    |   |    |
| I | 10 | ✓ |    | 4  | ✓ |    |   |    |
| I | 11 |   |    | 3  | ✓ |    |   |    |
| T | 12 | ✓ |    | 2  | ✓ |    |   |    |
| R | 13 |   | ✓  | 1  |   |    |   |    |

V K T T T G A V I D I I T R

dbValid true VYWYGKPDVKK PHOS(1) 2. 733. -1.13987 5.5202 100. ? 5238.  
 S\_Acido\_new%gi|68567609|gb|AAI80538.1| VYWYGKPDVKK%::::PHOS:::::sample\_0%compd\_3626

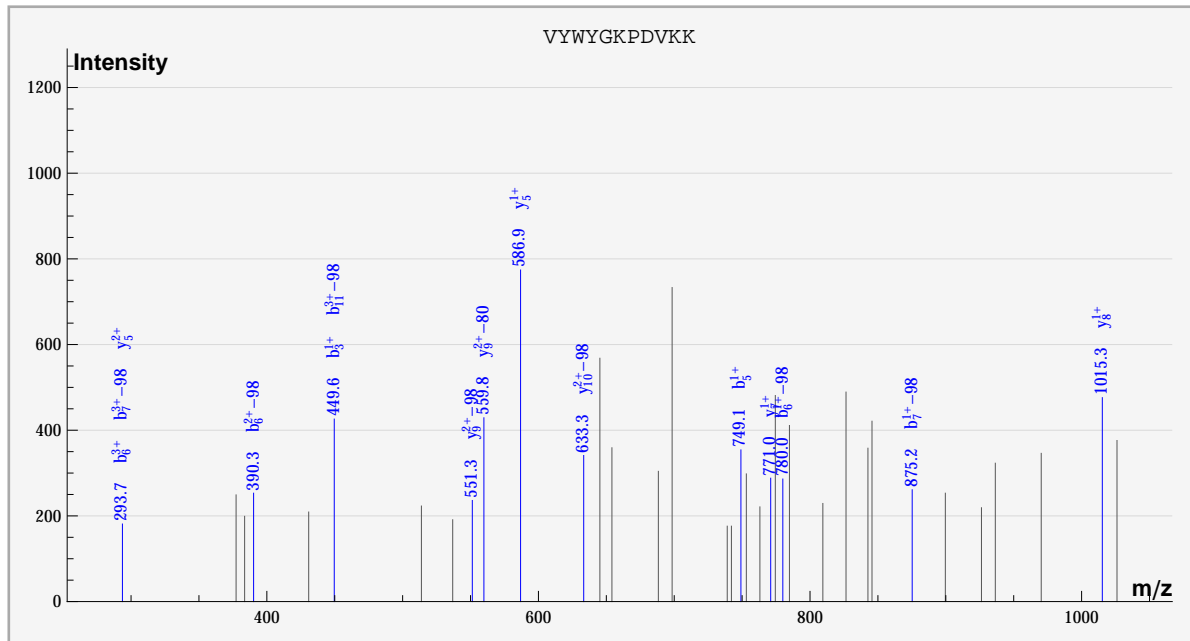

|   | #  | b | b* | #  | y | y* | P | P* |
|---|----|---|----|----|---|----|---|----|
| V | 1  |   |    |    |   |    |   |    |
| Y | 2  |   |    | 10 |   | ✓  |   |    |
| W | 3  | ✓ |    | 9  |   | ✓  |   |    |
| Y | 4  |   |    | 8  | ✓ |    |   |    |
| G | 5  | ✓ |    | 7  | ✓ |    |   |    |
| K | 6  | ✓ | ✓  | 6  |   |    |   |    |
| P | 7  |   | ✓  | 5  | ✓ |    |   |    |
| D | 8  |   |    | 4  |   |    |   |    |
| V | 9  |   |    | 3  |   |    |   |    |
| K | 10 |   |    | 2  |   |    |   |    |
| K | 11 |   | ✓  | 1  |   |    |   |    |

V Y W Y G K P D V K K

dbValid true LSTEIGSFTNR PHOS(3) 2. 734. -1.23596 5.42963 100. ? 2382.

S\_Acido\_new%gii68568244|gb|AAY81173.1| LSTEIGSFTNR%::PHOS:PHOS:::PHOS:::sample\_0%cmpd\_1037

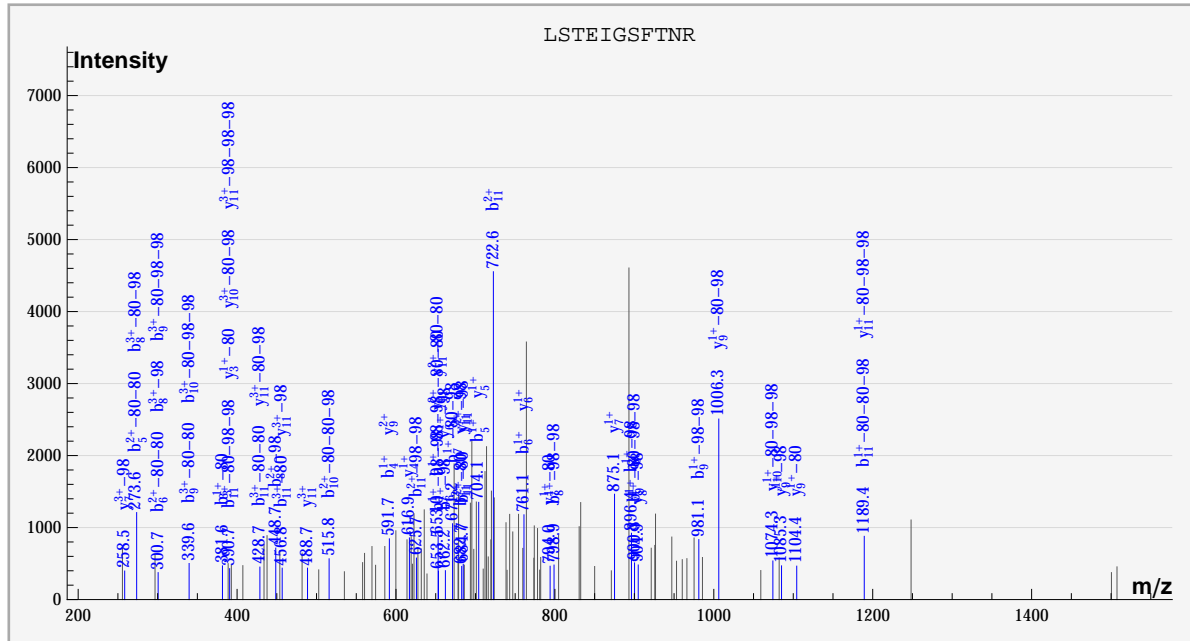

|   | #  | b | b* | #  | y | y* | P | P* |
|---|----|---|----|----|---|----|---|----|
| L | 1  |   |    |    |   |    | ✓ | ✓  |
| S | 2  |   |    | 10 |   | ✓  |   |    |
| T | 3  |   | ✓  | 9  | ✓ | ✓  |   |    |
| E | 4  | ✓ |    | 8  |   | ✓  |   |    |
| I | 5  | ✓ | ✓  | 7  | ✓ | ✓  |   |    |
| G | 6  | ✓ | ✓  | 6  | ✓ | ✓  |   |    |
| S | 7  |   | ✓  | 5  | ✓ |    |   |    |
| F | 8  |   | ✓  | 4  | ✓ |    |   |    |
| T | 9  |   | ✓  | 3  |   | ✓  |   |    |
| N | 10 |   | ✓  | 2  |   |    |   |    |
| R | 11 | ✓ | ✓  | 1  |   |    |   |    |

L S T E I G S F T N R

dbValid true KRGLSLVTDGNTK PHOS(1) 2. 734. 0.879587 5.01447 100. ? 3552.  
 S\_Acido\_new%gi|68566826|gb|AA79755.1| KRGLSLVTDGNTK%:::PHOS::%sample\_0%compd\_2100

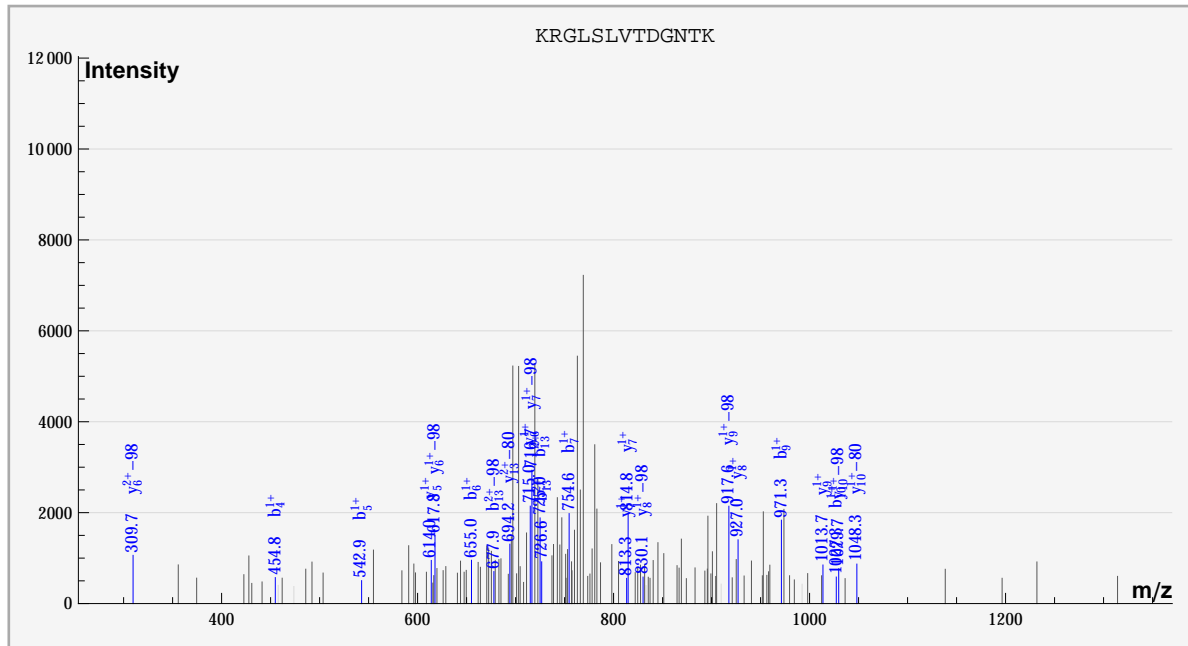

|   | #  | b | b* | #  | y | y* | P | P* |
|---|----|---|----|----|---|----|---|----|
| K | 1  |   |    |    |   |    |   | ✓  |
| R | 2  |   |    | 12 |   |    |   |    |
| G | 3  |   |    | 11 |   |    |   |    |
| L | 4  | ✓ |    | 10 |   | ✓  |   |    |
| S | 5  | ✓ |    | 9  | ✓ | ✓  |   |    |
| L | 6  | ✓ |    | 8  | ✓ | ✓  |   |    |
| V | 7  | ✓ |    | 7  | ✓ | ✓  |   |    |
| T | 8  |   |    | 6  | ✓ | ✓  |   |    |
| D | 9  | ✓ |    | 5  | ✓ |    |   |    |
| G | 10 | ✓ |    | 4  |   |    |   |    |
| N | 11 |   |    | 3  |   |    |   |    |
| T | 12 |   |    | 2  |   |    |   |    |
| K | 13 | ✓ | ✓  | 1  |   |    |   |    |

[ K R G [ L ] S ] L ] V ] T [ D ] G ] N T K ]

dbValid true EALKEAIVPTR PHOS(1) 2. 735. 0.373602 5.21988 100. ? 2274.  
 S\_Acido\_new%gi|68567777|gb|AAy80706.1| EALKEAIVPTR%:::PHOS::%sample\_0%compd\_939

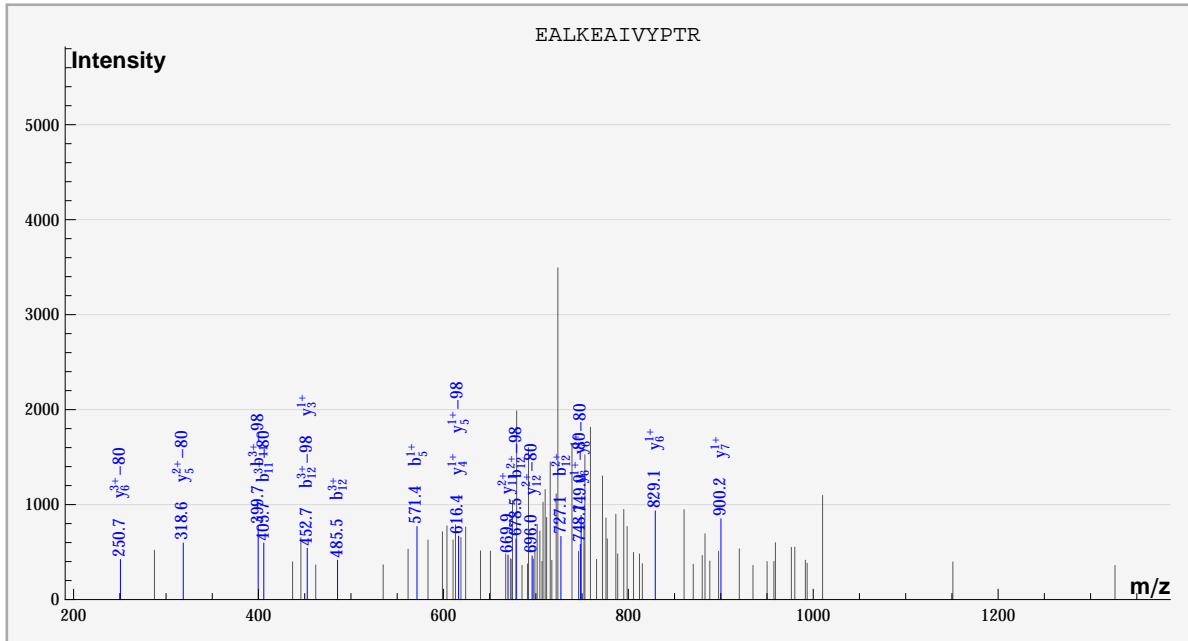

|   | #  | b | b* | #  | y | y* | P | P* |
|---|----|---|----|----|---|----|---|----|
| E | 1  |   |    |    |   |    |   | ✓  |
| A | 2  |   |    | 11 | ✓ |    |   |    |
| L | 3  |   |    | 10 |   |    |   |    |
| K | 4  |   |    | 9  |   |    |   |    |
| E | 5  | ✓ |    | 8  |   |    |   |    |
| A | 6  |   |    | 7  | ✓ |    |   |    |
| I | 7  |   |    | 6  | ✓ | ✓  |   |    |
| V | 8  |   |    | 5  |   | ✓  |   |    |
| Y | 9  |   |    | 4  | ✓ |    |   |    |
| P | 10 |   |    | 3  | ✓ |    |   |    |
| T | 11 |   | ✓  | 2  |   |    |   |    |
| R | 12 | ✓ | ✓  | 1  |   |    |   |    |

E A L K E A I V Y P T R

dbValid true SIVSVEEENKK PHOS(1) 2. 735. -0.131648 5.39626 100. ? 2310.  
 S\_Acido\_new%gi|68568168|gb|AA81097.1| SIVSVEEENKK%:PHOS:.....%sample\_0%cmpd\_972

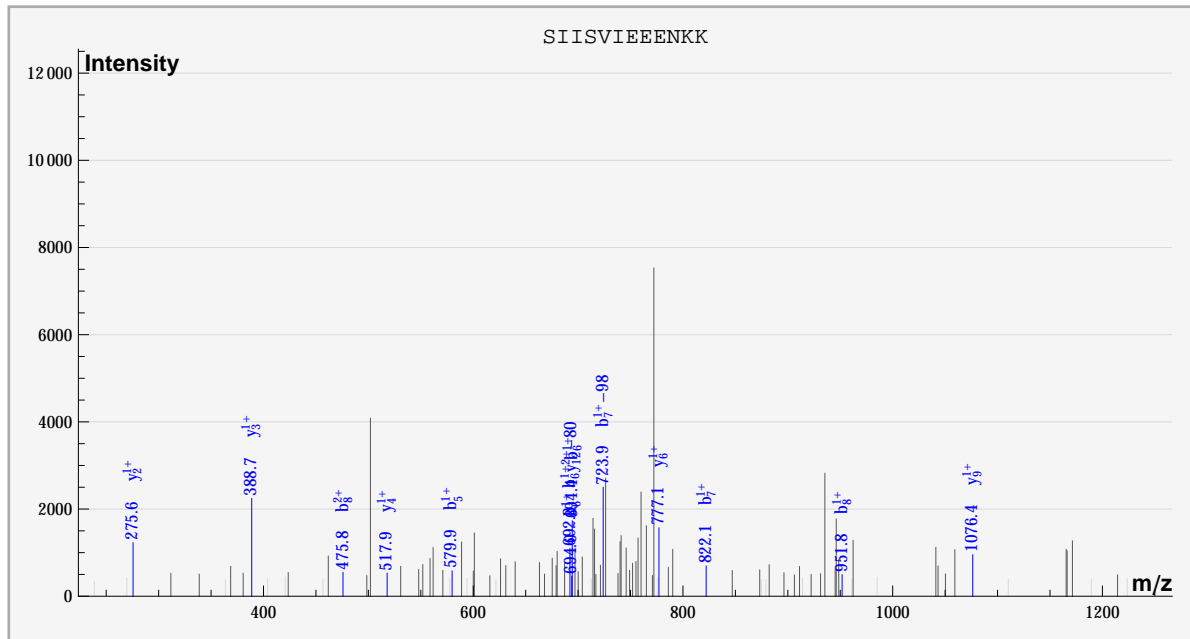

|   | #  | b | b* | #  | y | y* | P | P* |
|---|----|---|----|----|---|----|---|----|
| S | 1  |   |    |    |   |    |   | ✓  |
| I | 2  |   |    | 11 |   |    |   |    |
| I | 3  |   |    | 10 |   |    |   |    |
| S | 4  |   |    | 9  | ✓ |    |   |    |
| V | 5  | ✓ |    | 8  |   |    |   |    |
| I | 6  | ✓ |    | 7  |   |    |   |    |
| E | 7  | ✓ | ✓  | 6  | ✓ |    |   |    |
| E | 8  | ✓ |    | 5  |   |    |   |    |
| E | 9  |   |    | 4  | ✓ |    |   |    |
| N | 10 |   |    | 3  | ✓ |    |   |    |
| K | 11 |   |    | 2  | ✓ |    |   |    |
| K | 12 |   |    | 1  |   |    |   |    |

S I I S V I E E E N K K



dbValid true GHGTER PHOS(1) 1. 735. 1.27737 5.17989 100. ? 2436.

S\_Acido\_new%gi|68567981|gb|AAY80910.1| GHGTER%:::PHOS:::sample\_0%compd\_1082

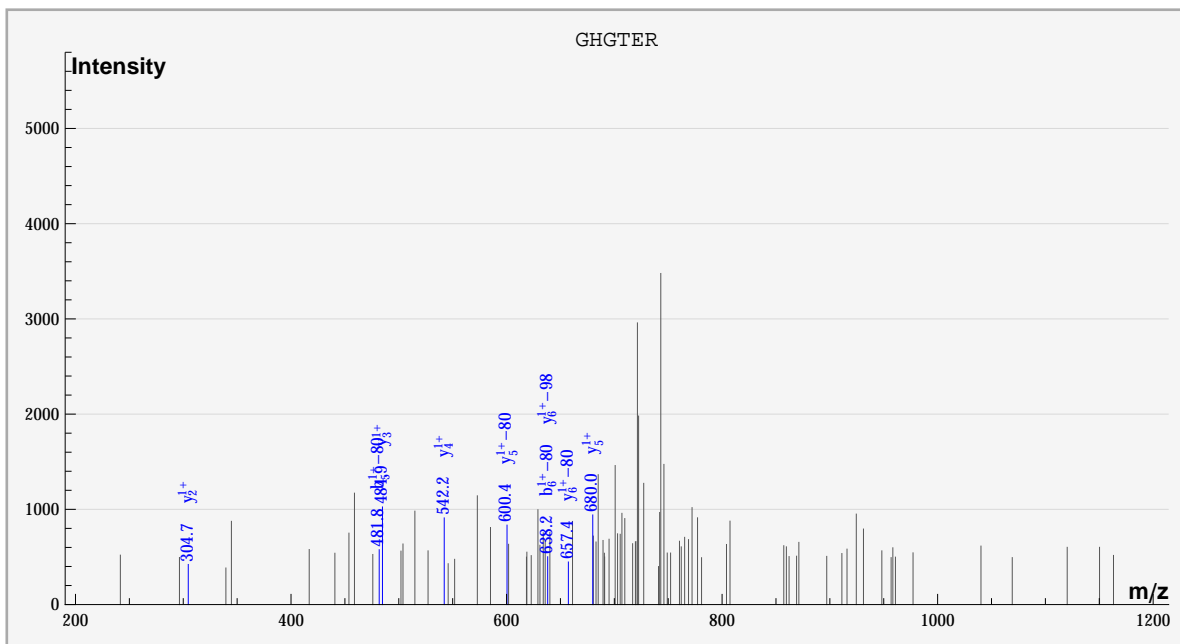

|   | # | b | b* | # | y | y* | P | P* |
|---|---|---|----|---|---|----|---|----|
| G | 1 |   |    |   |   |    |   | ✓  |
| H | 2 |   |    | 5 | ✓ | ✓  |   |    |
| G | 3 |   |    | 4 | ✓ |    |   |    |
| T | 4 |   |    | 3 | ✓ |    |   |    |
| E | 5 | ✓ |    | 2 | ✓ |    |   |    |
| R | 6 | ✓ |    | 1 |   |    |   |    |

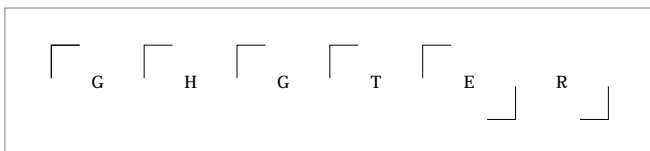



dbValid true MKNNVIIVNTSR PHOS(1) 2. 736. -1.12928 4.96858 100. ? 2880.  
 S\_Acido\_new%gi|68567773|gb|AAY80702.1| MKNNVIIVNTSR%::::::::::PHOS:::%sample\_0%compd\_1493

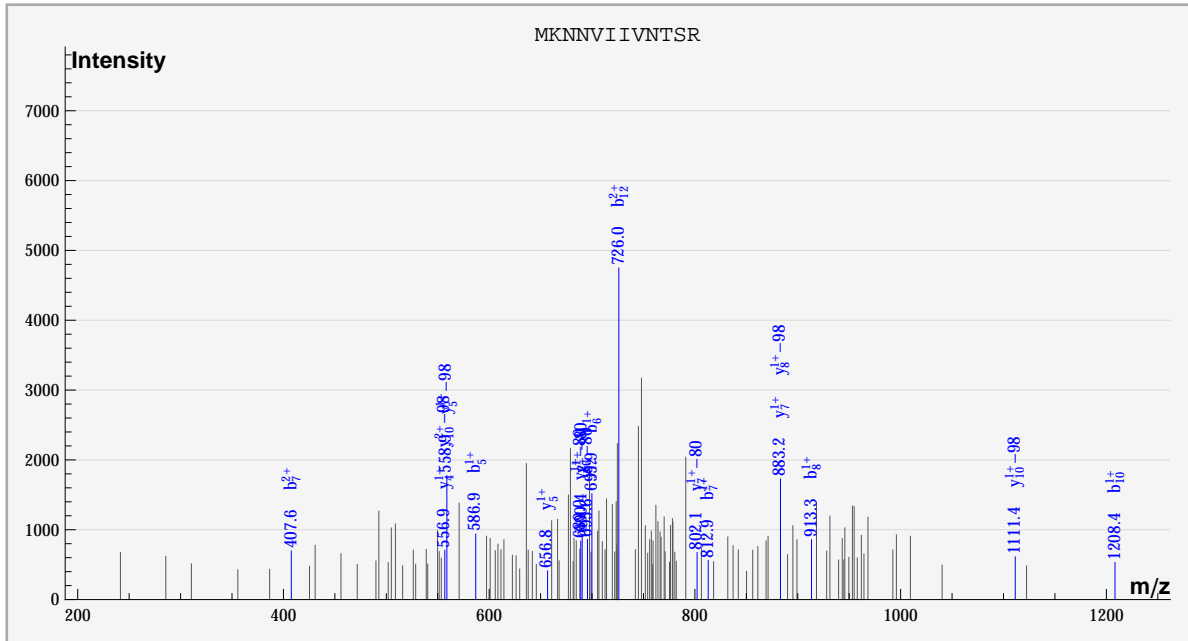

|   | #  | b | b* | #  | y | y* | P | P* |
|---|----|---|----|----|---|----|---|----|
| M | 1  |   |    |    |   |    |   | ✓  |
| K | 2  |   |    | 11 |   |    |   |    |
| N | 3  |   |    | 10 |   | ✓  |   |    |
| N | 4  |   |    | 9  |   |    |   |    |
| V | 5  | ✓ |    | 8  |   | ✓  |   |    |
| I | 6  | ✓ |    | 7  | ✓ | ✓  |   |    |
| I | 7  | ✓ |    | 6  |   | ✓  |   |    |
| V | 8  | ✓ |    | 5  | ✓ | ✓  |   |    |
| N | 9  |   |    | 4  | ✓ |    |   |    |
| T | 10 | ✓ |    | 3  |   |    |   |    |
| S | 11 |   |    | 2  |   |    |   |    |
| R | 12 | ✓ |    | 1  |   |    |   |    |

┌ M K ┌ N N ┌ V ┌ I ┌ I ┌ V ┌ N T ┌ S R ┌

dbValid true IYSTGLGVATTAR PHOS(2) 2. 736. -0.674543 5.54833 100. ? 2994.

S\_Acido\_new%gi|68566647|gb|AA79576.1| IYSTGLGVATTAR%::PHOS:::PHOS:::sample\_0%compd\_1593

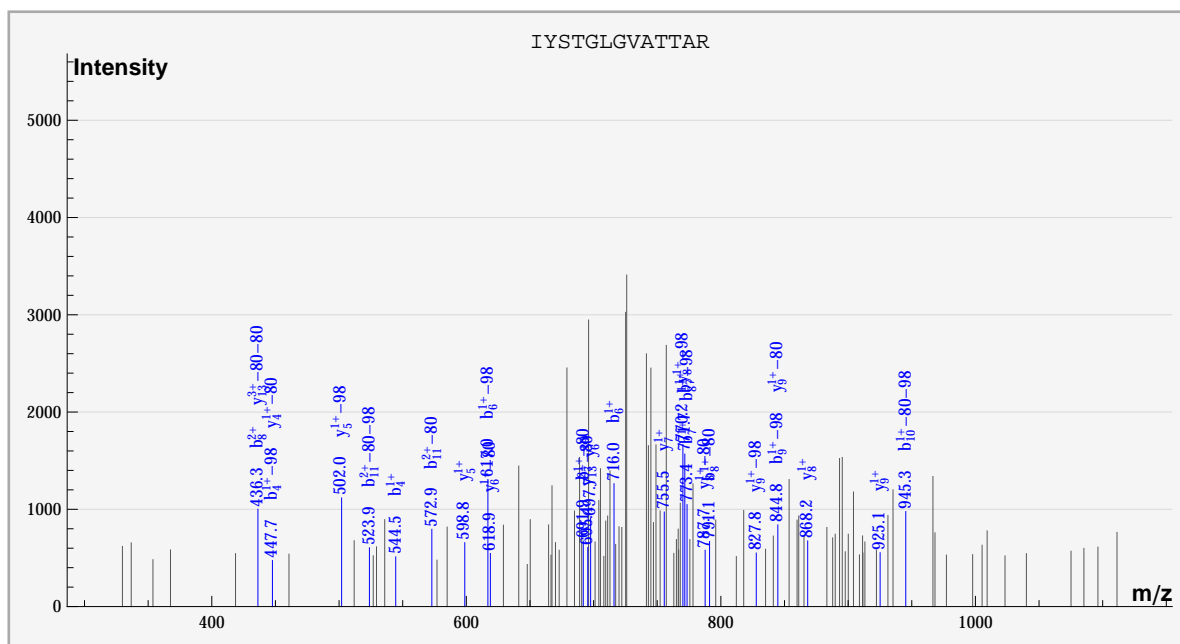

|   | #  | b | b* | #  | y | y* | P | P* |
|---|----|---|----|----|---|----|---|----|
| I | 1  |   |    |    |   |    |   | ✓  |
| Y | 2  |   |    | 12 |   |    |   |    |
| S | 3  |   |    | 11 |   |    |   |    |
| T | 4  | ✓ | ✓  | 10 |   |    |   |    |
| G | 5  |   |    | 9  | ✓ | ✓  |   |    |
| L | 6  | ✓ | ✓  | 8  | ✓ | ✓  |   |    |
| G | 7  | ✓ | ✓  | 7  | ✓ |    |   |    |
| V | 8  | ✓ | ✓  | 6  | ✓ | ✓  |   |    |
| A | 9  |   | ✓  | 5  | ✓ | ✓  |   |    |
| T | 10 |   | ✓  | 4  |   | ✓  |   |    |
| T | 11 |   | ✓  | 3  |   |    |   |    |
| A | 12 |   |    | 2  |   |    |   |    |
| R | 13 |   |    | 1  |   |    |   |    |

I Y S T G L G V A T T A R

dbValid true DYYWLKIRR PHOS(2) 2. 736. 0.827972 5.13821 100. ? 4290.  
 S\_Acido\_new%gi|68567630|gb|AA80559.1| DYYWLKIRR%::PHOS:PHOS:.....%sample\_0%cmpd\_2777

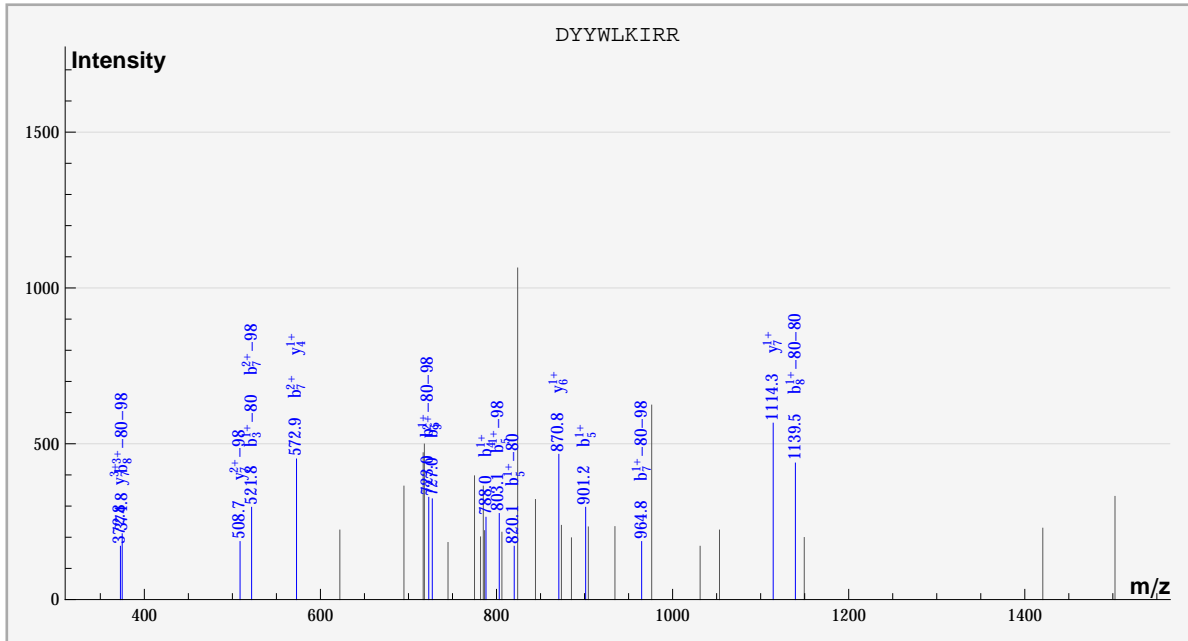

|   | # | b | b* | # | y | y* | P | P* |
|---|---|---|----|---|---|----|---|----|
| D | 1 |   |    |   |   |    |   |    |
| Y | 2 |   |    | 8 |   |    |   |    |
| Y | 3 |   | ✓  | 7 | ✓ | ✓  |   |    |
| W | 4 | ✓ |    | 6 | ✓ |    |   |    |
| L | 5 | ✓ | ✓  | 5 |   |    |   |    |
| K | 6 |   |    | 4 | ✓ |    |   |    |
| I | 7 | ✓ | ✓  | 3 |   |    |   |    |
| R | 8 |   | ✓  | 2 |   |    |   |    |
| R | 9 | ✓ |    | 1 |   |    |   |    |

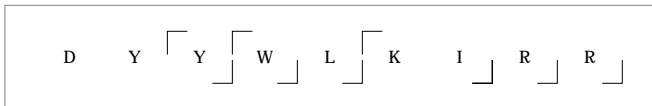

dbValid true VDKNYEQLLDR PHOS(1) 2. 736. 0.842672 5.78668 100. ? 5262.  
 S\_Acido\_new%gi|68567394|gb|AA80323.1| VDKNYEQLLDR%::::PHOS:::::%sample\_0%compd\_3650

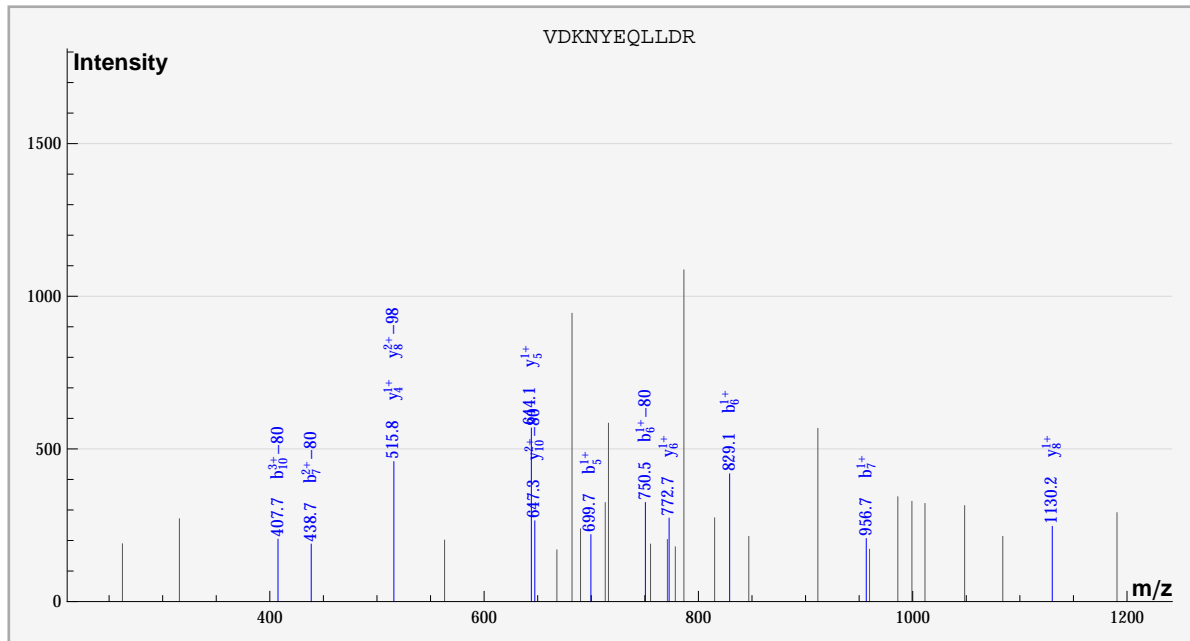

|   | #  | b | b* | #  | y | y* | P | P* |
|---|----|---|----|----|---|----|---|----|
| V | 1  |   |    |    |   |    |   |    |
| D | 2  |   |    | 10 |   | ✓  |   |    |
| K | 3  |   |    | 9  |   |    |   |    |
| N | 4  |   |    | 8  | ✓ | ✓  |   |    |
| Y | 5  | ✓ |    | 7  |   |    |   |    |
| E | 6  | ✓ | ✓  | 6  | ✓ |    |   |    |
| Q | 7  | ✓ | ✓  | 5  | ✓ |    |   |    |
| L | 8  |   |    | 4  | ✓ |    |   |    |
| L | 9  |   |    | 3  |   |    |   |    |
| D | 10 |   | ✓  | 2  |   |    |   |    |
| R | 11 |   |    | 1  |   |    |   |    |

V [ D K [ N Y ] E ] Q ] L L D ] R

dbValid true EYSAHKIAMIAIR PHOS(1) 2. 737. -1.64785 5.19943 100. ? 1656.  
 S\_Acido\_new%gi|68567400|gb|AAy80329.1| EYSAHKIAMIAIR%::PHOS:::.....%sample\_2%cmpd\_352

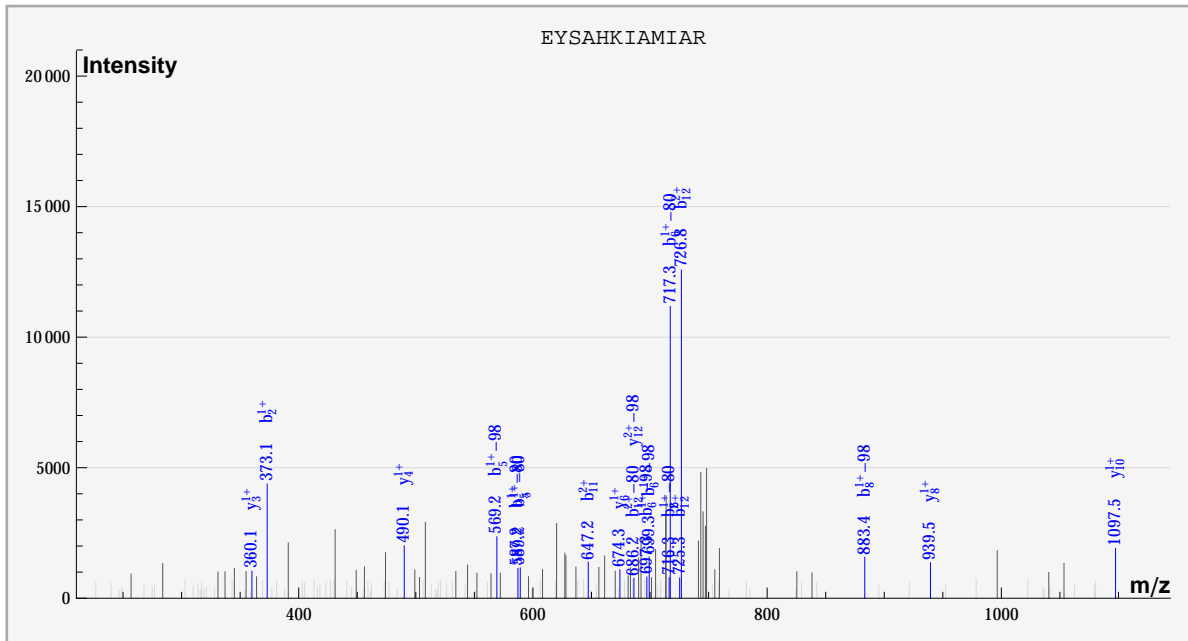

|   | #  | b | b* | #  | y | y* | P | P* |
|---|----|---|----|----|---|----|---|----|
| E | 1  |   |    |    |   |    |   | ✓  |
| Y | 2  | ✓ |    | 11 |   |    |   |    |
| S | 3  |   |    | 10 | ✓ |    |   |    |
| A | 4  |   |    | 9  |   |    |   |    |
| H | 5  |   | ✓  | 8  | ✓ |    |   |    |
| K | 6  |   | ✓  | 7  |   |    |   |    |
| I | 7  |   |    | 6  | ✓ |    |   |    |
| A | 8  |   | ✓  | 5  |   |    |   |    |
| M | 9  |   |    | 4  | ✓ |    |   |    |
| I | 10 |   |    | 3  | ✓ |    |   |    |
| A | 11 | ✓ |    | 2  |   |    |   |    |
| R | 12 | ✓ | ✓  | 1  |   |    |   |    |

[ E Y ] S A [ H ] K [ I ] A [ M ] I A [ R ]

dbValid true RFVIASALSSNPK PHOS(1) 2. 737. -1.62078 5.09476 100. ? 1794.  
 S\_Acido\_new%gi68567316|gb|AAY80245.1| RFVIASALSSNPK%:::PHOS:::sample\_2%compd\_474

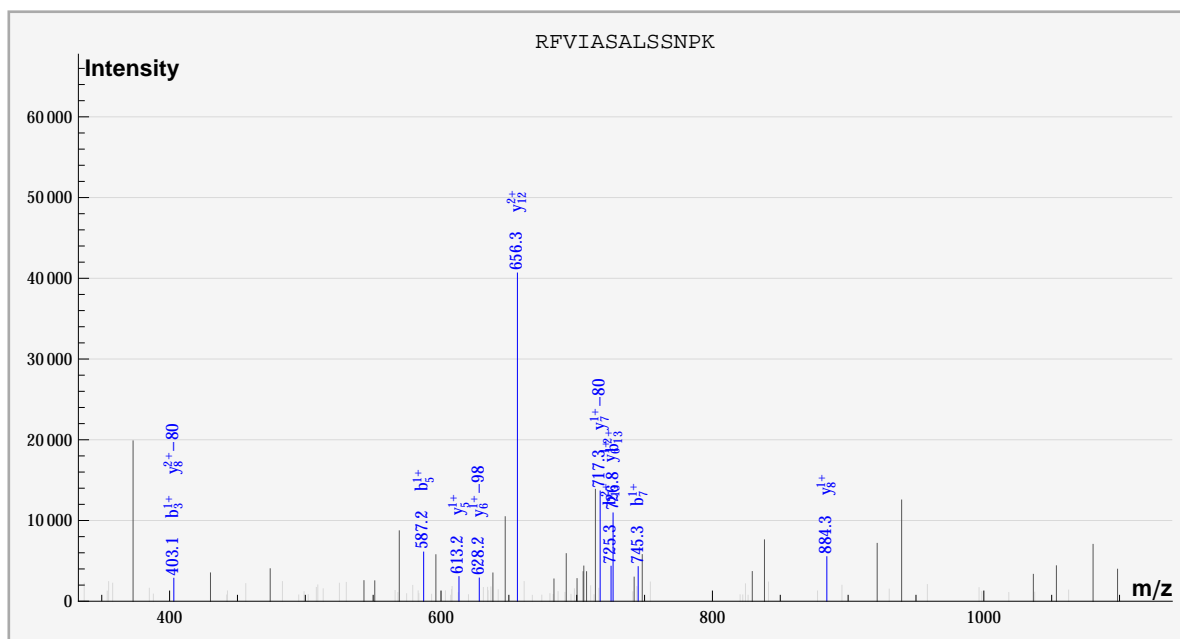

|   | #  | b | b* | #  | y | y* | P | P* |
|---|----|---|----|----|---|----|---|----|
| R | 1  |   |    |    |   |    |   |    |
| F | 2  |   |    | 12 | ✓ |    |   |    |
| V | 3  | ✓ |    | 11 |   |    |   |    |
| I | 4  |   |    | 10 |   |    |   |    |
| A | 5  | ✓ |    | 9  |   |    |   |    |
| S | 6  |   |    | 8  | ✓ | ✓  |   |    |
| A | 7  | ✓ |    | 7  |   | ✓  |   |    |
| L | 8  |   |    | 6  | ✓ | ✓  |   |    |
| S | 9  |   |    | 5  | ✓ |    |   |    |
| S | 10 |   |    | 4  |   |    |   |    |
| N | 11 |   |    | 3  |   |    |   |    |
| P | 12 |   |    | 2  |   |    |   |    |
| K | 13 | ✓ |    | 1  |   |    |   |    |

R [ F V ] I A [ S [ A [ L [ S S N P K ] ] ] ]



dbValid true YDWFSEMRKK PHOS(1) 2. 737. -1.68222 5.06454 100. ? 2214.  
 S\_Acido\_new%gi|68568446|gb|AAY81375.1| YDWFSEMRKK%:PHOS:.....:sample\_3%compd\_824

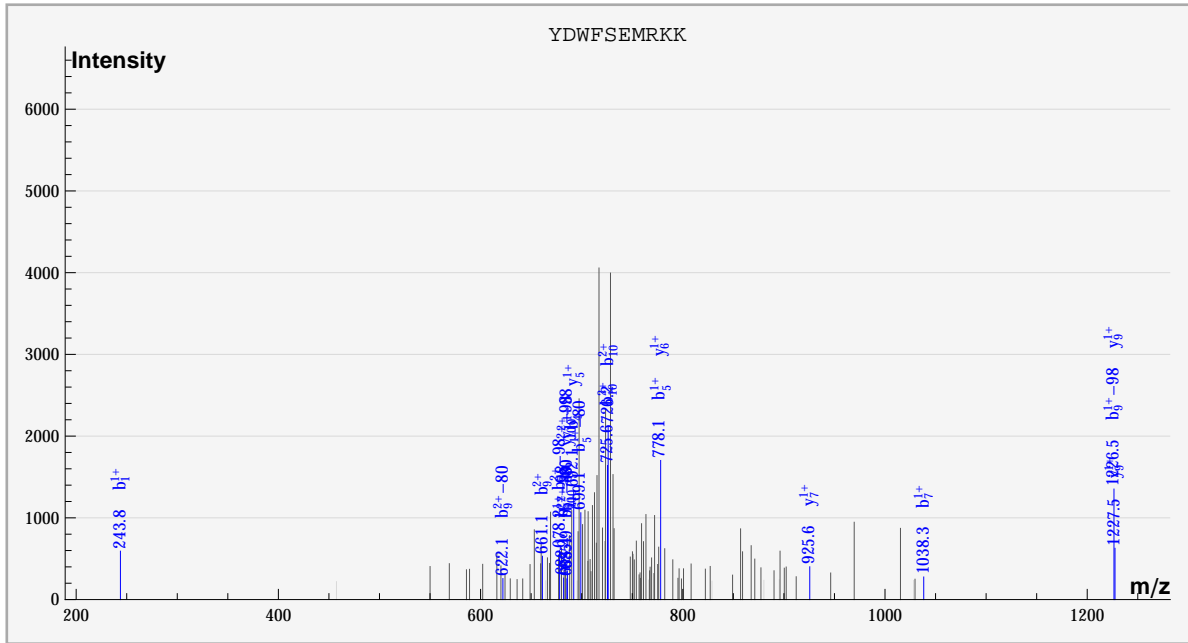

|   | #  | b | b* | # | y | y* | P | P* |
|---|----|---|----|---|---|----|---|----|
| Y | 1  | ✓ |    |   |   |    |   | ✓  |
| D | 2  |   |    | 9 | ✓ |    |   |    |
| W | 3  |   |    | 8 |   |    |   |    |
| F | 4  | ✓ |    | 7 | ✓ |    |   |    |
| S | 5  | ✓ | ✓  | 6 | ✓ |    |   |    |
| E | 6  |   |    | 5 | ✓ |    |   |    |
| M | 7  | ✓ |    | 4 |   |    |   |    |
| R | 8  |   |    | 3 |   |    |   |    |
| K | 9  | ✓ | ✓  | 2 |   |    |   |    |
| K | 10 | ✓ | ✓  | 1 |   |    |   |    |

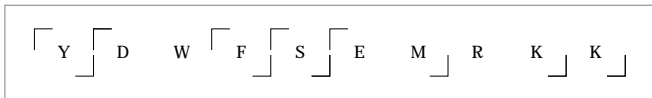

dbValid true YYPGGGDIYVK PHOS(3) 2. 737. -0.747233 5.20663 100. ? 2286.

S\_Acido\_new%gil68566641|gb|AA79570.1| YYPGGGDIYVK%:PHOS:PHOS:.....PHOS:::sample\_3%compd\_885

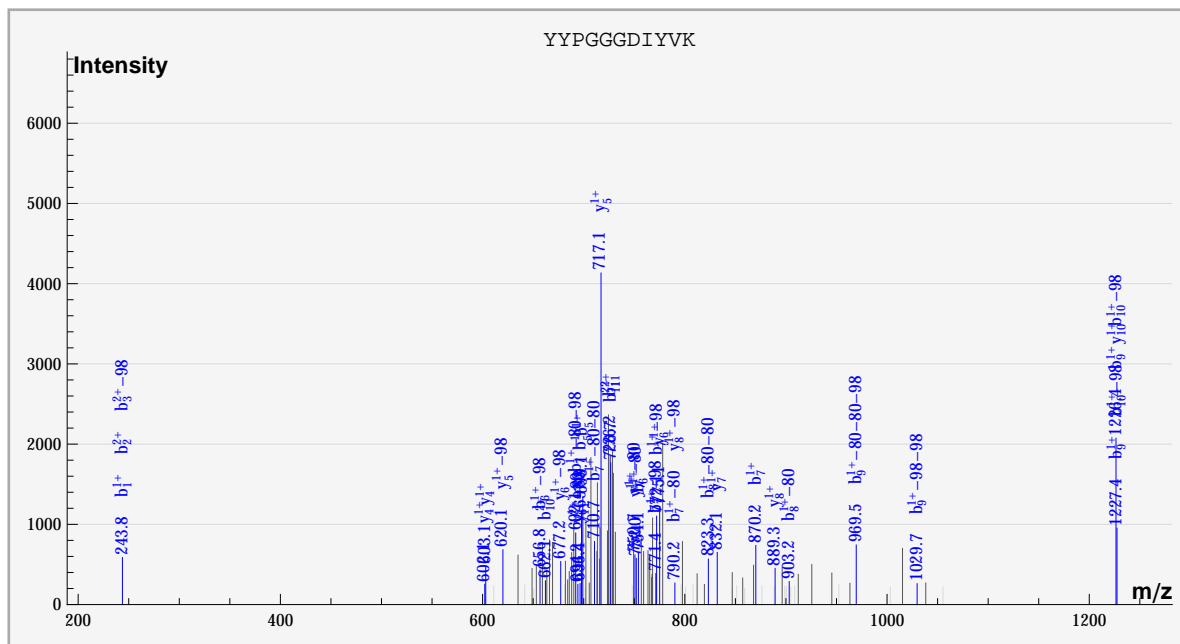

|   | #  | b | b* | #  | y | y* | P | P* |
|---|----|---|----|----|---|----|---|----|
| Y | 1  | ✓ |    |    |   |    |   | ✓  |
| Y | 2  | ✓ |    | 10 | ✓ |    |   |    |
| P | 3  |   | ✓  | 9  |   |    |   |    |
| G | 4  |   |    | 8  | ✓ | ✓  |   |    |
| G | 5  | ✓ |    | 7  | ✓ | ✓  |   |    |
| G | 6  | ✓ | ✓  | 6  | ✓ | ✓  |   |    |
| D | 7  | ✓ | ✓  | 5  | ✓ | ✓  |   |    |
| I | 8  |   | ✓  | 4  | ✓ |    |   |    |
| Y | 9  | ✓ | ✓  | 3  |   |    |   |    |
| V | 10 | ✓ | ✓  | 2  |   |    |   |    |
| K | 11 | ✓ |    | 1  |   |    |   |    |

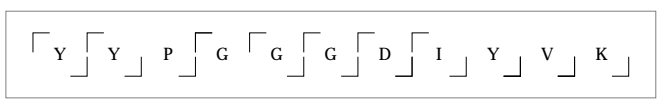

dbValid true YYPGGGDIYVK PHOS(3) 2. 737. -0.747233 5.07403 100. ? 2310.

S\_Acido\_new%gi|68566641|gb|AA79570.1|\_YYPGGGDIYVK%:PHOS:PHOS:::PHOS:::sample\_3%compd\_905

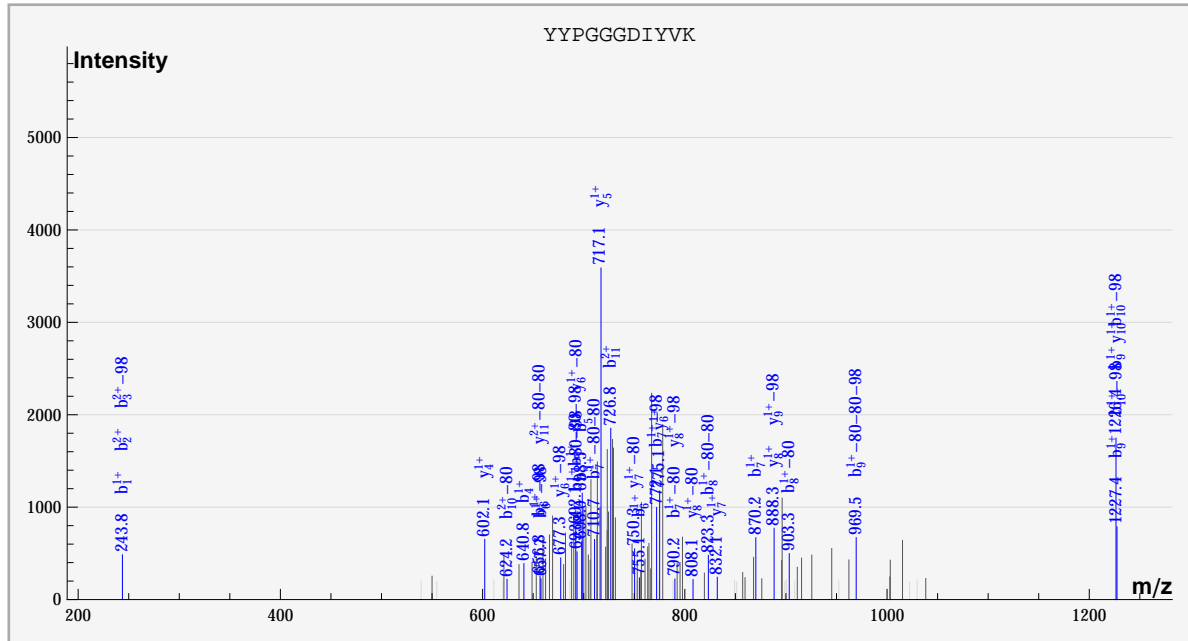

|   | #  | b | b* | #  | y | y* | P | P* |
|---|----|---|----|----|---|----|---|----|
| Y | 1  | ✓ |    |    |   |    |   | ✓  |
| Y | 2  | ✓ |    | 10 | ✓ |    |   |    |
| P | 3  |   | ✓  | 9  |   | ✓  |   |    |
| G | 4  | ✓ |    | 8  | ✓ | ✓  |   |    |
| G | 5  | ✓ |    | 7  | ✓ | ✓  |   |    |
| G | 6  | ✓ | ✓  | 6  | ✓ | ✓  |   |    |
| D | 7  | ✓ | ✓  | 5  | ✓ |    |   |    |
| I | 8  |   | ✓  | 4  | ✓ |    |   |    |
| Y | 9  | ✓ | ✓  | 3  |   |    |   |    |
| V | 10 |   | ✓  | 2  |   |    |   |    |
| K | 11 | ✓ |    | 1  |   |    |   |    |

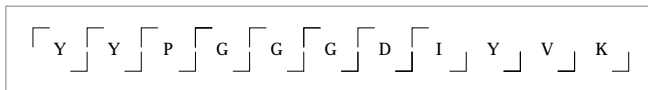

dbValid true YYPGGGDIYVK PHOS(3) 2. 737. -0.747233 5.07753 100. ? 2322.

S\_Acido\_new%gil68566641|gb|AA79570.1| YYPGGGDIYVK%:PHOS:PHOS:::PHOS:::sample\_3%compd\_916

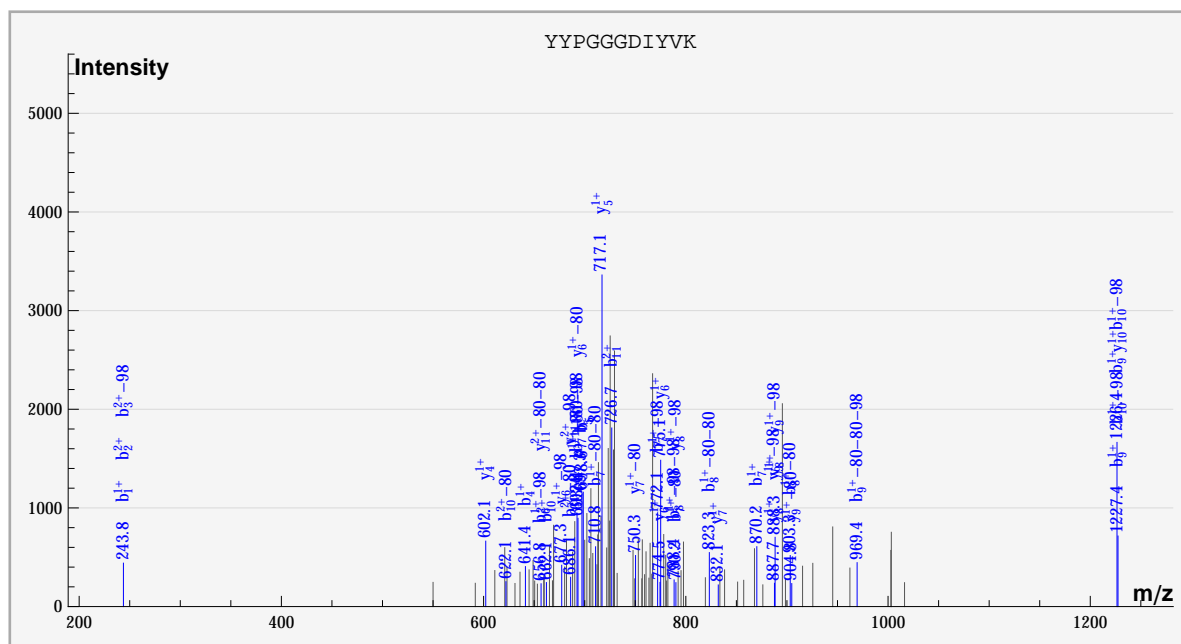

|   | #  | b | b* | #  | y | y* | P | P* |
|---|----|---|----|----|---|----|---|----|
| Y | 1  | ✓ |    |    |   |    |   | ✓  |
| Y | 2  | ✓ |    | 10 | ✓ |    |   |    |
| P | 3  |   | ✓  | 9  |   | ✓  |   |    |
| G | 4  | ✓ |    | 8  | ✓ | ✓  |   |    |
| G | 5  | ✓ |    | 7  | ✓ | ✓  |   |    |
| G | 6  |   | ✓  | 6  | ✓ | ✓  |   |    |
| D | 7  | ✓ | ✓  | 5  | ✓ |    |   |    |
| I | 8  |   | ✓  | 4  | ✓ |    |   |    |
| Y | 9  | ✓ | ✓  | 3  |   |    |   |    |
| V | 10 | ✓ | ✓  | 2  |   |    |   |    |
| K | 11 | ✓ | ✓  | 1  |   |    |   |    |

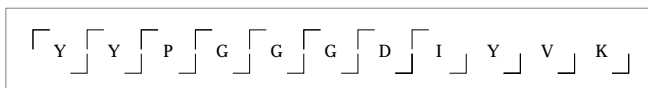

dbValid true YDWFSEMRKK PHOS(1) 2. 737. -1.68222 5.01172 100. ? 2484.  
 S\_Acido\_new%gi|68568446|gb|AAY81375.1| YDWFSEMRKK%:PHOS:.....:sample\_0%cmpd\_1129

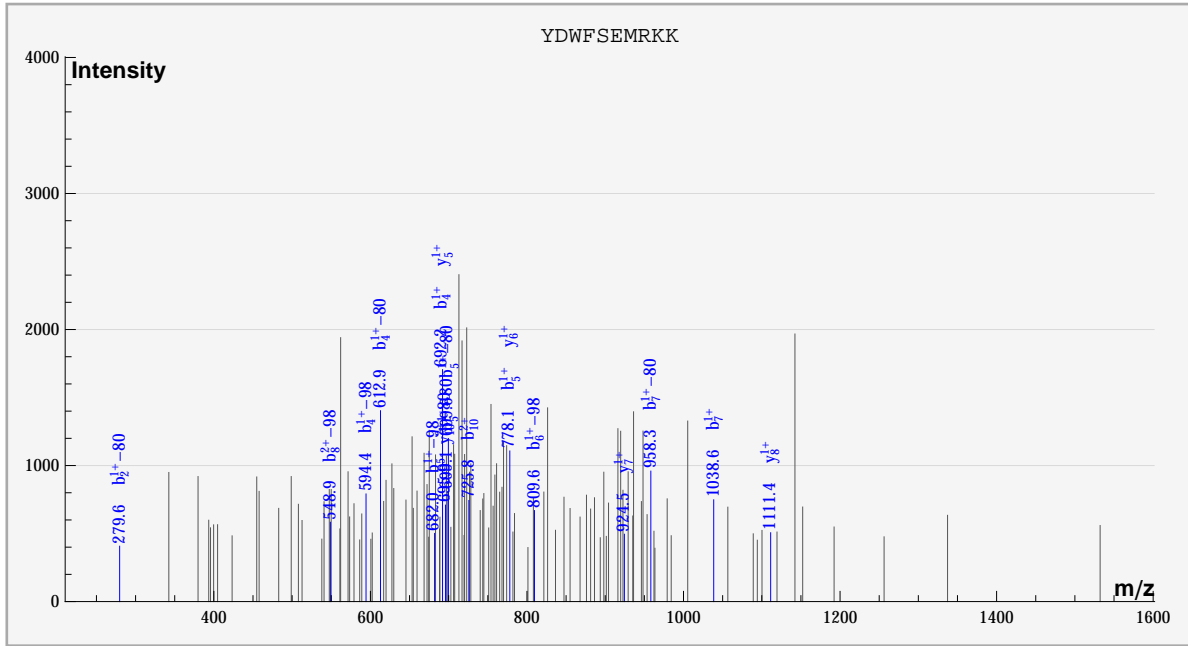

|   | #  | b | b* | # | y | y* | P | P* |
|---|----|---|----|---|---|----|---|----|
| Y | 1  |   |    |   |   |    |   | ✓  |
| D | 2  |   | ✓  | 9 |   |    |   |    |
| W | 3  |   |    | 8 | ✓ |    |   |    |
| F | 4  | ✓ | ✓  | 7 | ✓ |    |   |    |
| S | 5  | ✓ | ✓  | 6 | ✓ |    |   |    |
| E | 6  |   | ✓  | 5 | ✓ |    |   |    |
| M | 7  | ✓ | ✓  | 4 |   |    |   |    |
| R | 8  |   | ✓  | 3 |   |    |   |    |
| K | 9  |   |    | 2 |   |    |   |    |
| K | 10 | ✓ |    | 1 |   |    |   |    |

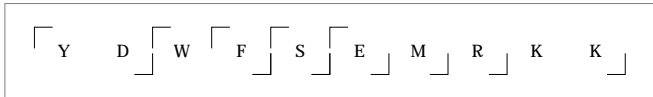

dbValid true ETIYSGGNWER PHOS(2) 2. 737. -0.731858 5.08918 100. ? 2502.

S\_Acido\_new%gi|68566944|gb|AAY79873.1| ETIYSGGNWER%::PHOS::PHOS:::sample\_2%compd\_1082

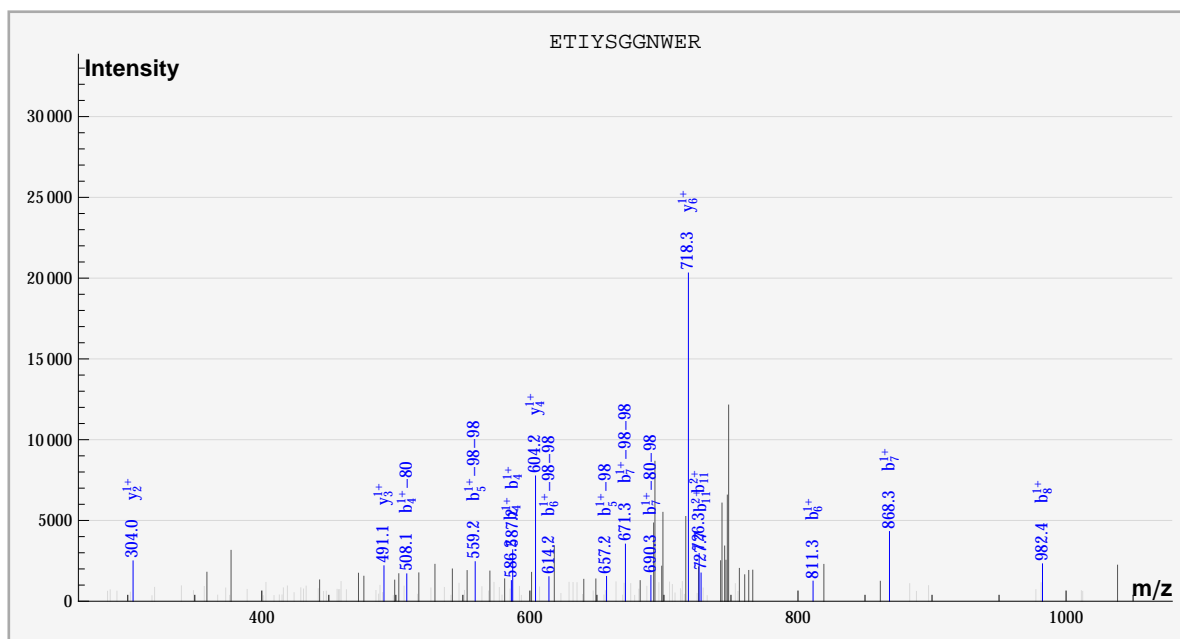

|   | #  | b | b* | #  | y | y* | P | P* |
|---|----|---|----|----|---|----|---|----|
| E | 1  |   |    |    |   |    |   |    |
| T | 2  |   |    | 10 |   |    |   |    |
| I | 3  |   |    | 9  |   |    |   |    |
| Y | 4  | ✓ | ✓  | 8  |   |    |   |    |
| S | 5  |   | ✓  | 7  |   |    |   |    |
| G | 6  | ✓ | ✓  | 6  | ✓ |    |   |    |
| G | 7  | ✓ | ✓  | 5  |   |    |   |    |
| N | 8  | ✓ |    | 4  | ✓ |    |   |    |
| W | 9  |   |    | 3  | ✓ |    |   |    |
| E | 10 |   |    | 2  | ✓ |    |   |    |
| R | 11 | ✓ |    | 1  |   |    |   |    |

E T I Y S G G N W E R

dbValid true GTKPPR PHOS(1) 1. 737. -1.64512 5.71007 100. ? 2568.  
 S\_Acido\_new%gi|68567861|gb|AAY80790.1| GTKPPR%::PHOS%:::%sample\_0%compd\_1207

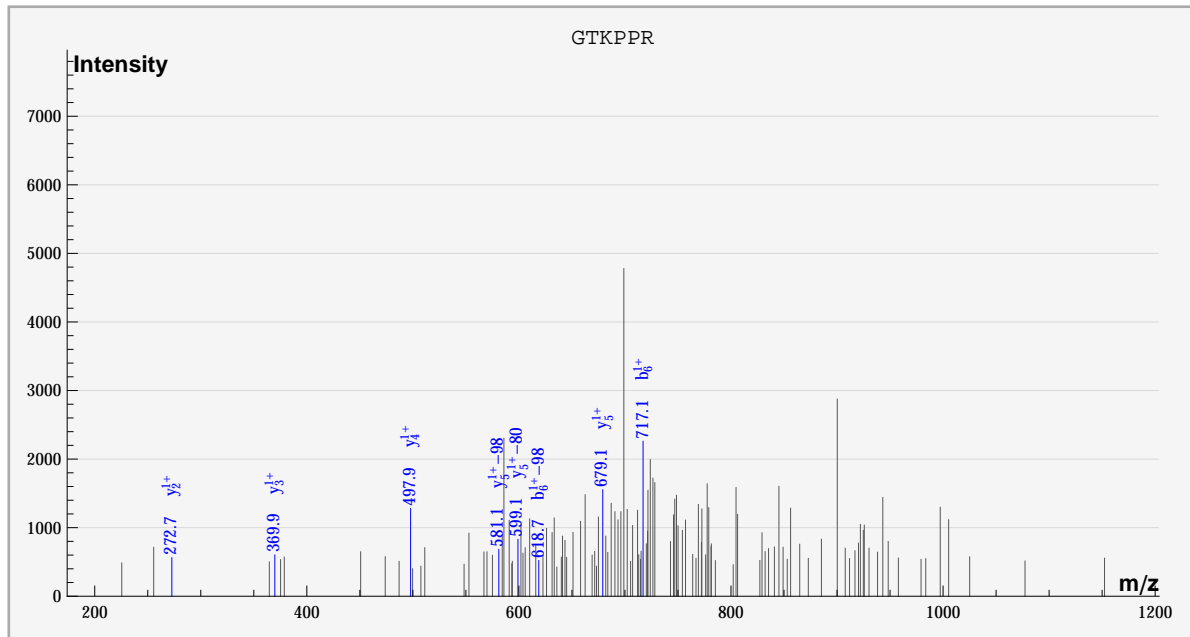

|   | # | b | b* | # | y | y* | P | P* |
|---|---|---|----|---|---|----|---|----|
| G | 1 |   |    |   |   |    |   |    |
| T | 2 |   |    | 5 | ✓ | ✓  |   |    |
| K | 3 |   |    | 4 | ✓ |    |   |    |
| P | 4 |   |    | 3 | ✓ |    |   |    |
| P | 5 |   |    | 2 | ✓ |    |   |    |
| R | 6 | ✓ | ✓  | 1 |   |    |   |    |

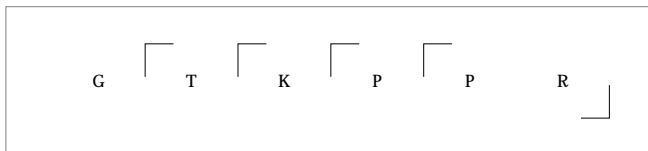

dbValid true EGKYTGTEIIEER PHOS(1) 2. 737. 1.3425 5.30469 100. ? 4338.  
 S\_Acido\_new%gi|68568391|gb|AAY81320.1| EGKYTGTEIIEER%::::PHOS::::::::::%sample\_0%compd\_2821

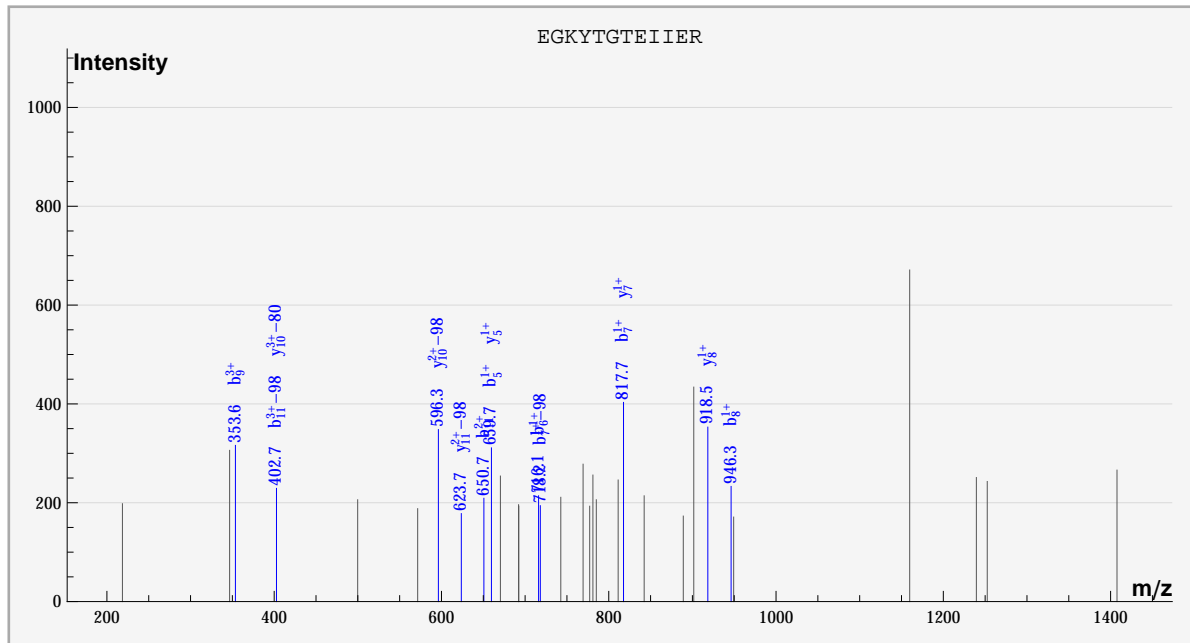

|   | #  | b | b* | #  | y | y* | P | P* |
|---|----|---|----|----|---|----|---|----|
| E | 1  |   |    |    |   |    |   |    |
| G | 2  |   |    | 11 |   | ✓  |   |    |
| K | 3  |   |    | 10 |   | ✓  |   |    |
| Y | 4  |   |    | 9  |   |    |   |    |
| T | 5  | ✓ |    | 8  | ✓ |    |   |    |
| G | 6  | ✓ |    | 7  | ✓ |    |   |    |
| T | 7  | ✓ | ✓  | 6  |   |    |   |    |
| E | 8  | ✓ |    | 5  | ✓ |    |   |    |
| I | 9  | ✓ |    | 4  |   |    |   |    |
| I | 10 |   |    | 3  |   |    |   |    |
| E | 11 | ✓ | ✓  | 2  |   |    |   |    |
| R | 12 |   |    | 1  |   |    |   |    |

E [ G [ K Y [ T ] G ] T ] E ] I ] I E ] R



dbValid true LNSNVTLITRGK PHOS(2) 2. 738. 0.354552 5.2059 100. ? 2562.

S\_Acido\_new%gi|68566825|gb|AA79754.1| LNSNVTLITRGK%:::PHOS:::PHOS:::%sample\_2%compd\_1118

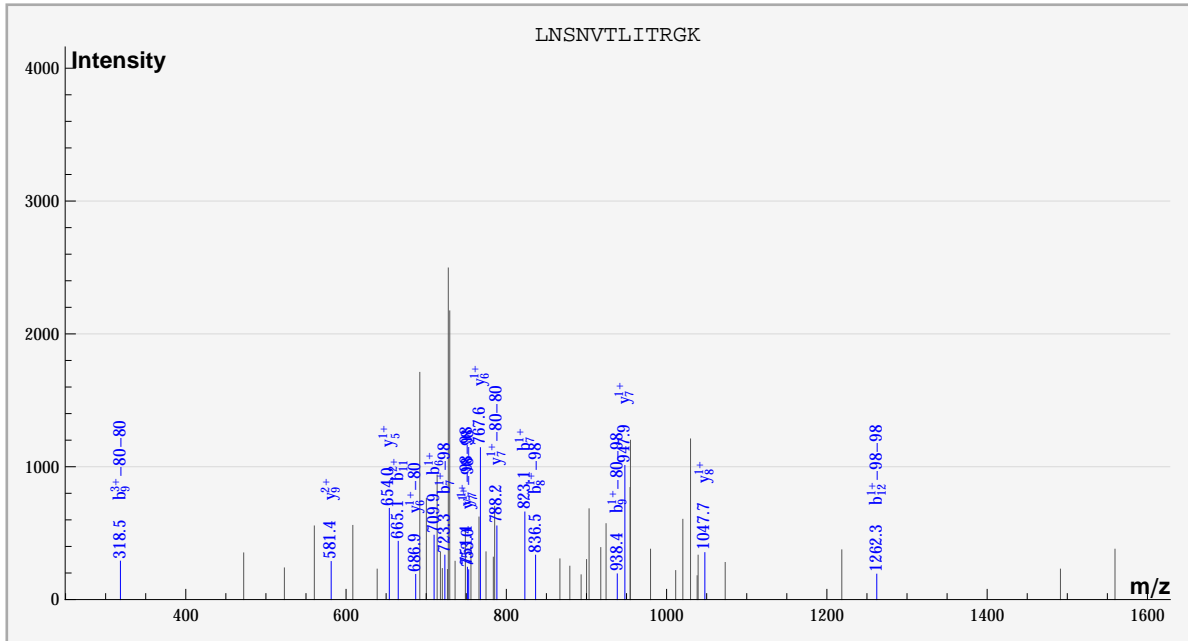

|   | #  | b | b* | #  | y | y* | P | P* |
|---|----|---|----|----|---|----|---|----|
| L | 1  |   |    |    |   |    |   |    |
| N | 2  |   |    | 11 |   |    |   |    |
| S | 3  |   |    | 10 |   |    |   |    |
| N | 4  |   |    | 9  | ✓ |    |   |    |
| V | 5  |   |    | 8  | ✓ |    |   |    |
| T | 6  | ✓ |    | 7  | ✓ | ✓  |   |    |
| L | 7  | ✓ | ✓  | 6  | ✓ | ✓  |   |    |
| I | 8  |   | ✓  | 5  | ✓ |    |   |    |
| T | 9  |   | ✓  | 4  |   |    |   |    |
| R | 10 |   |    | 3  |   |    |   |    |
| G | 11 | ✓ |    | 2  |   |    |   |    |
| K | 12 |   | ✓  | 1  |   |    |   |    |

L N S N V T L I T R G K

dbValid true VISLLI PHOS(1) 1. 739. -1.57917 5.22947 100. ? 2850.  
 S\_Acido\_new%gi|68567764|gb|AAY80693.1| VISLLI%:::PHOS:::%sample\_0%cmpd\_1464

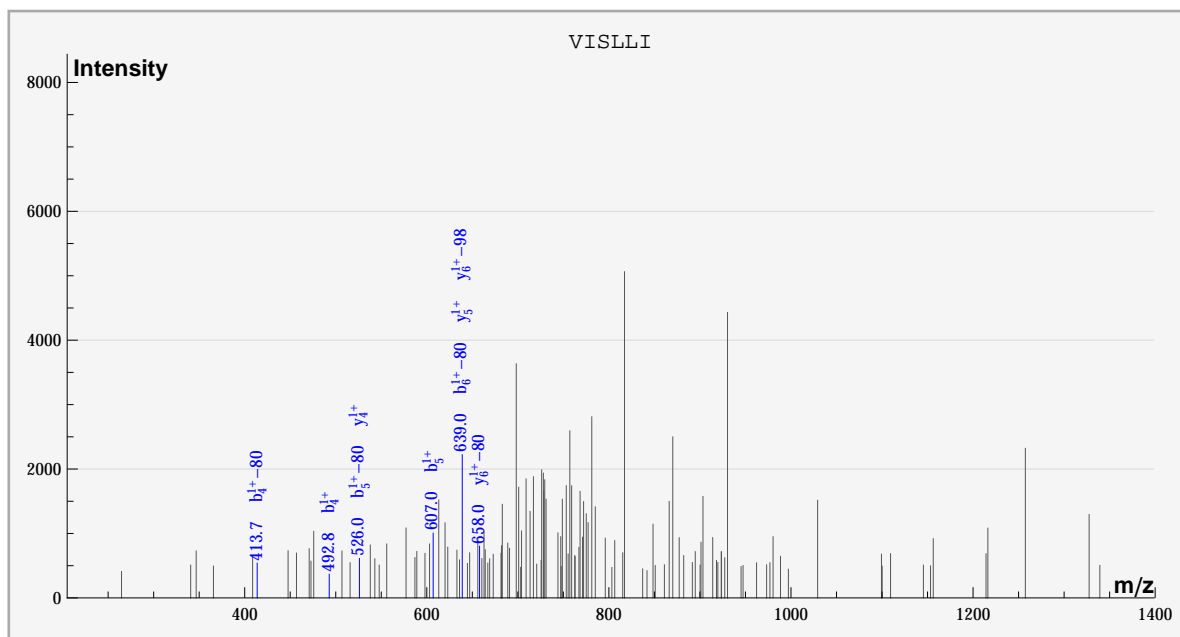

|   | # | b | b* | # | y | y* | P | P* |
|---|---|---|----|---|---|----|---|----|
| V | 1 |   |    |   |   |    |   | ✓  |
| I | 2 |   |    | 5 | ✓ |    |   |    |
| S | 3 |   |    | 4 | ✓ |    |   |    |
| L | 4 | ✓ | ✓  | 3 |   |    |   |    |
| L | 5 | ✓ | ✓  | 2 |   |    |   |    |
| I | 6 |   | ✓  | 1 |   |    |   |    |

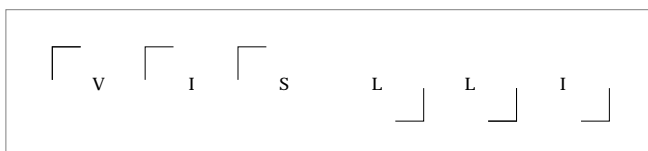

dbValid true KTKTVSTTATDSR PHOS(1) 2. 739. -0.641308 5.56544 100. ? 2886.  
 S\_Acido\_new%gii68568452|gb|AAy81381.1| KTKTVSTTATDSR%::::::::::PHOS::%sample\_0%cmpd\_1497

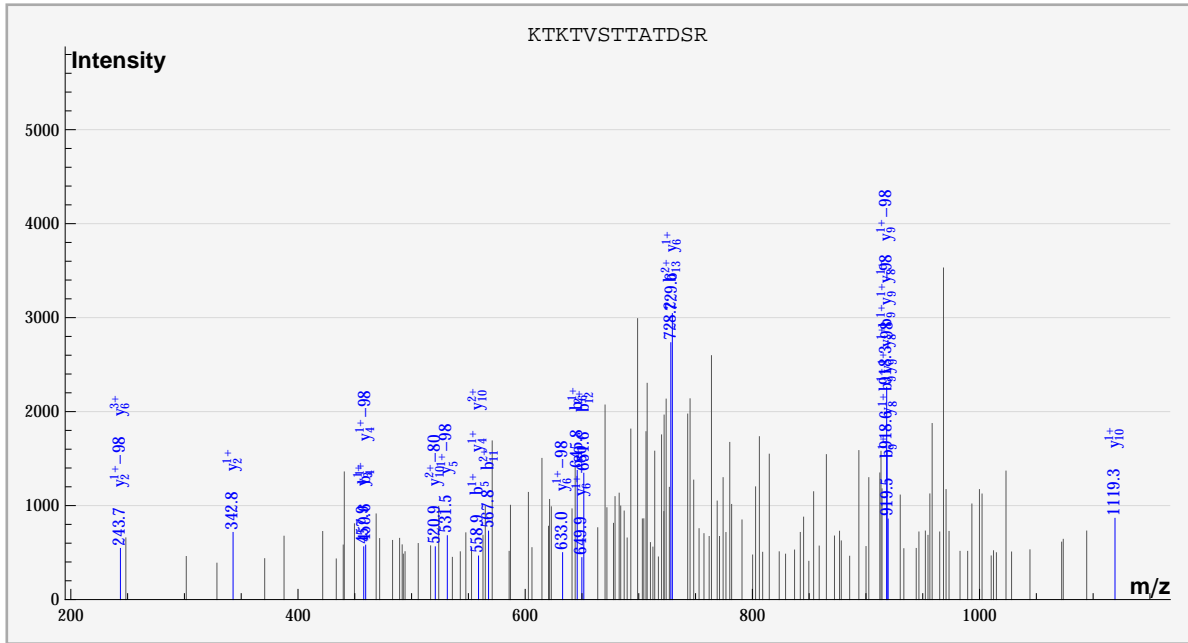

|   | #  | b | b* | #  | y | y* | P | P* |
|---|----|---|----|----|---|----|---|----|
| K | 1  |   |    |    |   |    |   |    |
| T | 2  |   |    | 12 |   |    |   |    |
| K | 3  |   |    | 11 |   |    |   |    |
| T | 4  | ✓ |    | 10 | ✓ | ✓  |   |    |
| V | 5  | ✓ |    | 9  |   | ✓  |   |    |
| S | 6  | ✓ |    | 8  | ✓ |    |   |    |
| T | 7  |   |    | 7  |   |    |   |    |
| T | 8  |   |    | 6  | ✓ | ✓  |   |    |
| A | 9  | ✓ |    | 5  |   | ✓  |   |    |
| T | 10 |   |    | 4  | ✓ | ✓  |   |    |
| D | 11 | ✓ |    | 3  | ✓ |    |   |    |
| S | 12 | ✓ |    | 2  | ✓ | ✓  |   |    |
| R | 13 | ✓ |    | 1  |   |    |   |    |

K T K T V S T T A T D S R

dbValid true WTTITQERK PHOS(2) 2. 740. -0.168753 5.16036 100. ? 2850.

S\_Acido\_new%gi|68568234|gb|AAy81163.1| WTTITQERK%::PHOS:PHOS:::sample\_1%compd\_1462

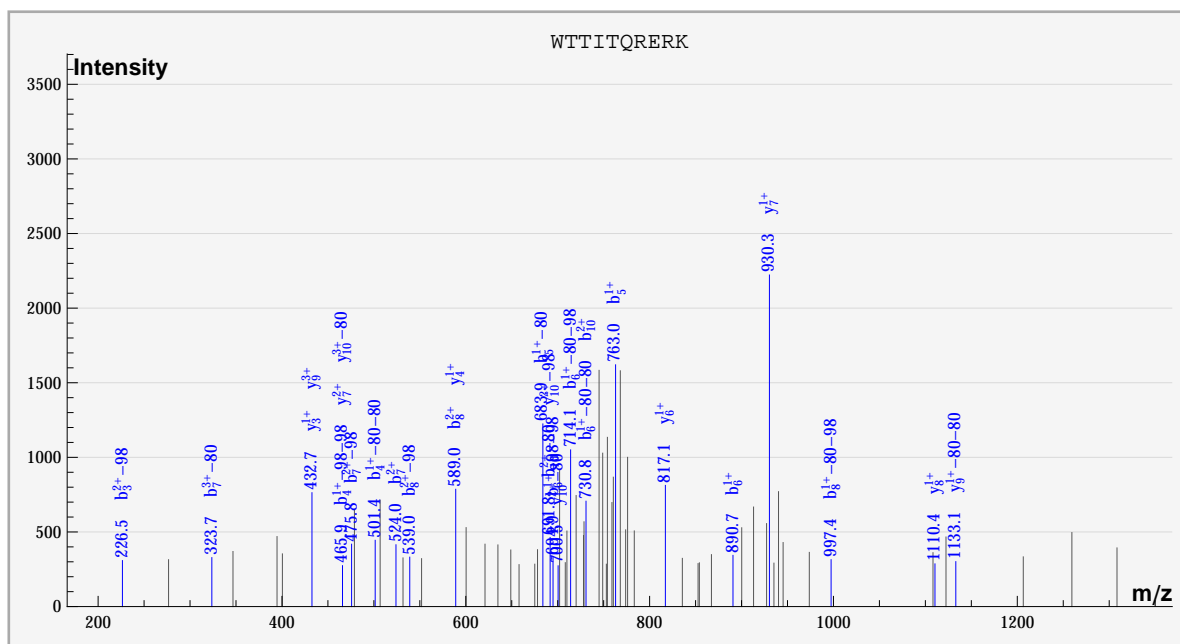

|   | #  | b | b* | # | y | y* | P | P* |
|---|----|---|----|---|---|----|---|----|
| W | 1  |   |    |   |   |    |   | ✓  |
| T | 2  |   |    | 9 | ✓ | ✓  |   |    |
| T | 3  |   | ✓  | 8 | ✓ |    |   |    |
| I | 4  |   | ✓  | 7 | ✓ |    |   |    |
| T | 5  | ✓ | ✓  | 6 | ✓ |    |   |    |
| Q | 6  | ✓ | ✓  | 5 |   |    |   |    |
| R | 7  | ✓ | ✓  | 4 | ✓ |    |   |    |
| E | 8  | ✓ | ✓  | 3 | ✓ |    |   |    |
| R | 9  |   |    | 2 |   |    |   |    |
| K | 10 | ✓ | ✓  | 1 |   |    |   |    |

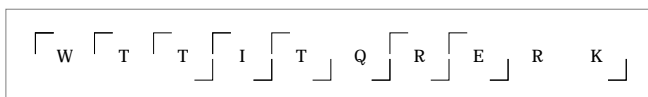

dbValid true ADIVIVTGGSSAGEK PHOS(1) 2. 741. 1.3556 5.03726 100. ? 2208.

S\_Acido\_new%gil68567406|gb|AAY80335.1| ADIVIVTGGSSAGEK%:::PHOS:::%sample\_1%compd\_875

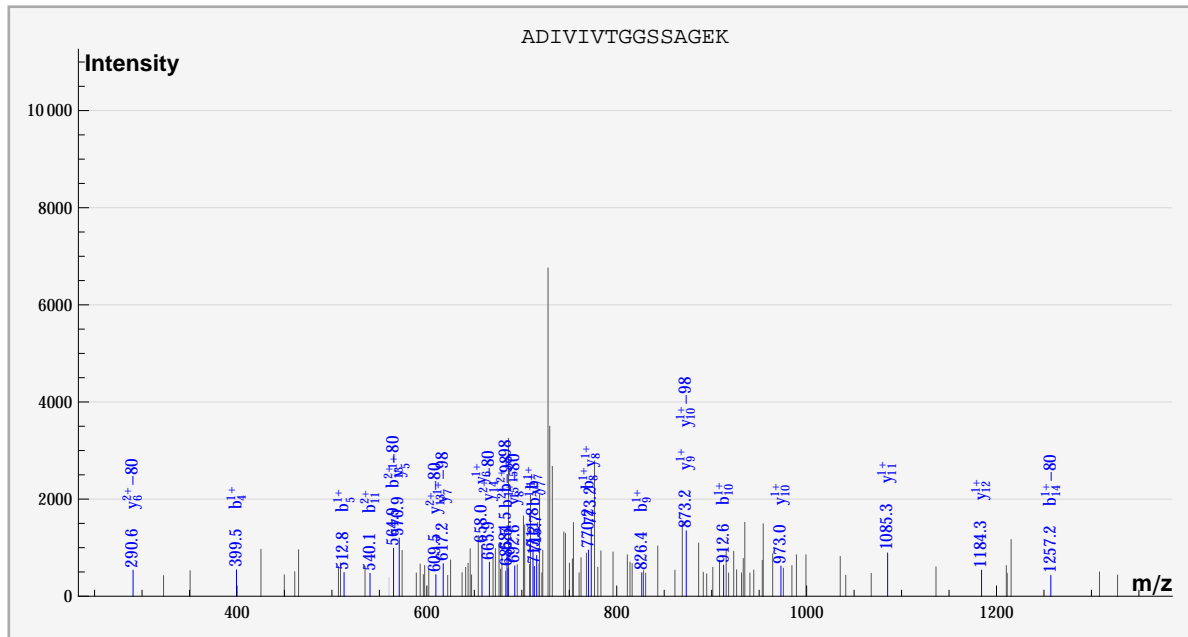

|   | #  | b | b* | #  | y | y* | P | P* |
|---|----|---|----|----|---|----|---|----|
| A | 1  |   |    |    |   |    |   |    |
| D | 2  |   |    | 14 |   | ✓  |   |    |
| I | 3  |   |    | 13 |   | ✓  |   |    |
| V | 4  | ✓ |    | 12 | ✓ |    |   |    |
| I | 5  | ✓ |    | 11 | ✓ |    |   |    |
| V | 6  |   |    | 10 | ✓ | ✓  |   |    |
| T | 7  | ✓ |    | 9  | ✓ |    |   |    |
| G | 8  | ✓ |    | 8  | ✓ | ✓  |   |    |
| G | 9  | ✓ |    | 7  | ✓ | ✓  |   |    |
| S | 10 | ✓ |    | 6  | ✓ | ✓  |   |    |
| S | 11 | ✓ |    | 5  | ✓ |    |   |    |
| A | 12 |   |    | 4  |   |    |   |    |
| G | 13 |   | ✓  | 3  |   |    |   |    |
| E | 14 |   | ✓  | 2  |   |    |   |    |
| K | 15 |   | ✓  | 1  |   |    |   |    |

A D I V I V T G G S S A G E K

dbValid true GELDTK PHOS(1) 1. 741. 1.30185 5.12895 100. ? 3024.

S\_Acido\_new%gi|68567126|gb|AAY80055.1| GELDTK%::::PHOS::%sample\_1%compd\_1618

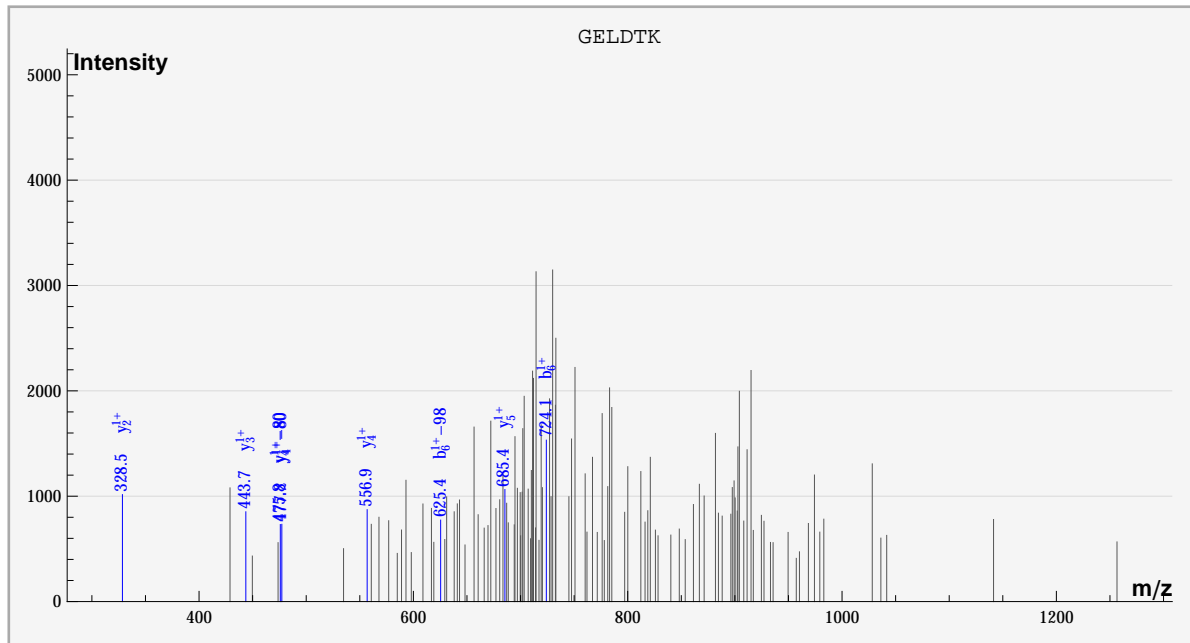

|   | # | b | b* | # | y | y* | P | P* |
|---|---|---|----|---|---|----|---|----|
| G | 1 |   |    |   |   |    |   |    |
| E | 2 |   |    | 5 | ✓ |    |   |    |
| L | 3 |   |    | 4 | ✓ | ✓  |   |    |
| D | 4 |   |    | 3 | ✓ |    |   |    |
| T | 5 |   |    | 2 | ✓ |    |   |    |
| K | 6 | ✓ | ✓  | 1 |   |    |   |    |

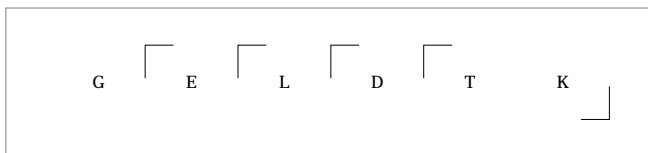

dbValid true AVDTTR PHOS(1) 1. 741. 1.31309 5.44695 100. ? 3858.

S\_Acido\_new%gi|68567048|gb|AAY79977.1| AVDTTR%:::PHOS:::sample\_1%compd\_2382

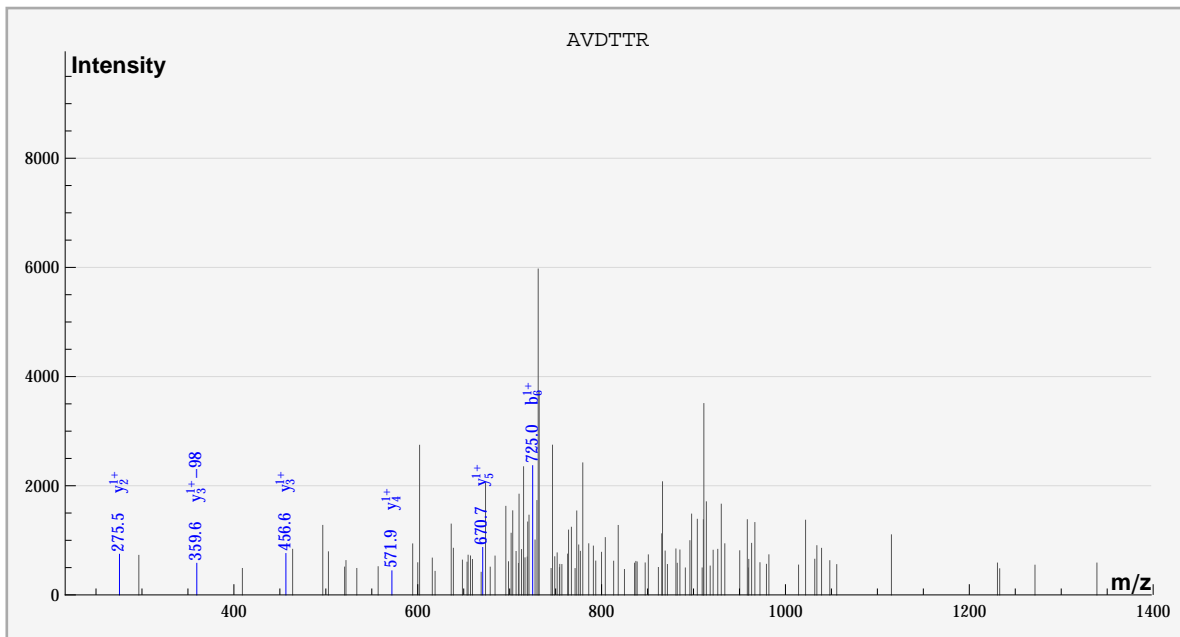

|   | # | b | b* | # | y | y* | P | P* |
|---|---|---|----|---|---|----|---|----|
| A | 1 |   |    |   |   |    |   |    |
| V | 2 |   |    | 5 | ✓ |    |   |    |
| D | 3 |   |    | 4 | ✓ |    |   |    |
| T | 4 |   |    | 3 | ✓ | ✓  |   |    |
| T | 5 |   |    | 2 | ✓ |    |   |    |
| R | 6 | ✓ |    | 1 |   |    |   |    |

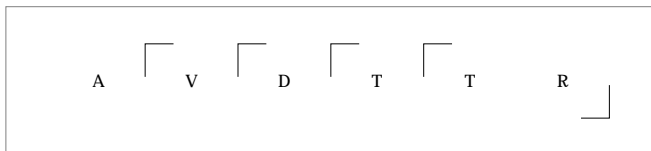

dbValid true GKVTKK PHOS(1) 1. 742. -1.59342 5.38066 100. ? 2028.  
 S\_Acido\_new%gi|68567254|gb|AAY80183.1| GKVTKK%:::PHOS:::sample\_1%compd\_710

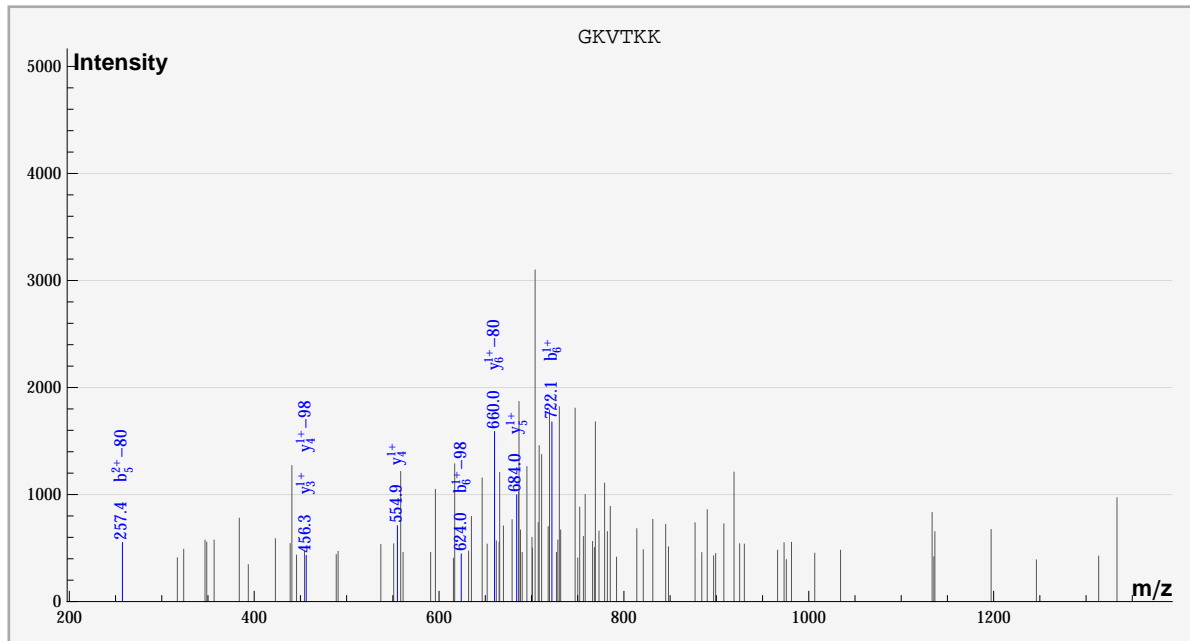

|   | # | b | b* | # | y | y* | P | P* |
|---|---|---|----|---|---|----|---|----|
| G | 1 |   |    |   |   |    |   | ✓  |
| K | 2 |   |    | 5 | ✓ |    |   |    |
| V | 3 |   |    | 4 | ✓ | ✓  |   |    |
| T | 4 |   |    | 3 | ✓ |    |   |    |
| K | 5 | ✓ | ✓  | 2 |   |    |   |    |
| K | 6 | ✓ | ✓  | 1 |   |    |   |    |

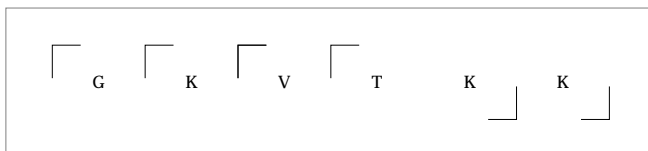



dbValid true QLITVWRYSR PHOS(2) 2. 743. -1.66129 5.07155 100. ? 1506.

S\_Acido\_new%gi|68566691|gb|AAY79620.1| QLITVWRYSR%:::PHOS:PHOS::%sample\_3%compd\_219

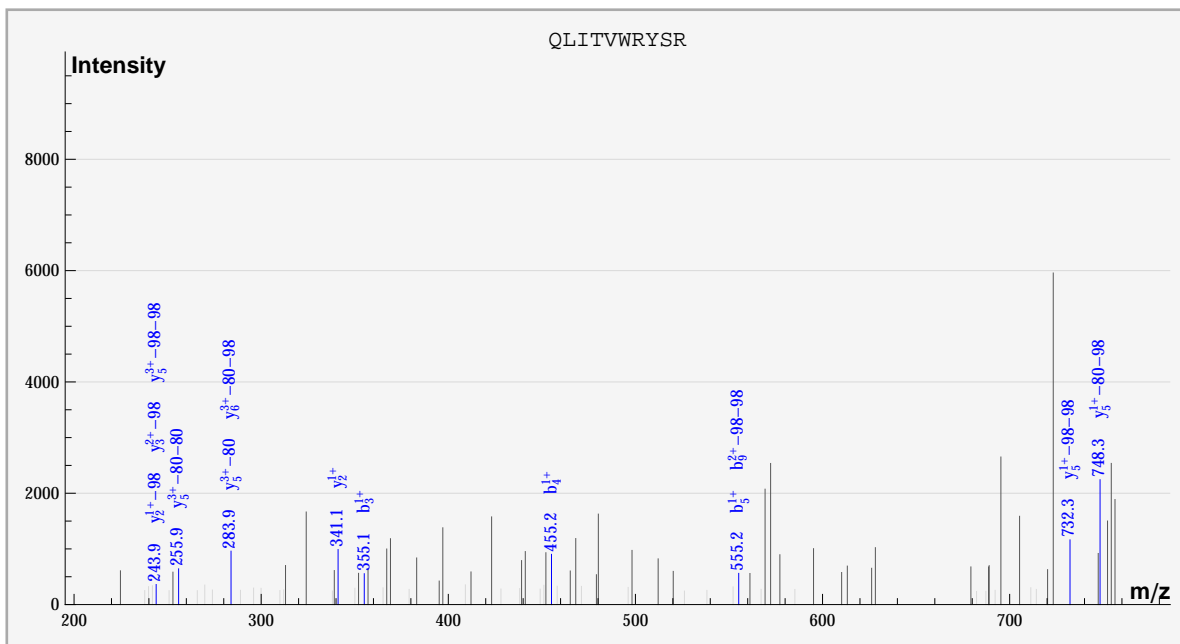

|   | #  | b | b* | # | y | y* | P | P* |
|---|----|---|----|---|---|----|---|----|
| Q | 1  |   |    |   |   |    |   |    |
| L | 2  |   |    | 9 |   |    |   |    |
| I | 3  | ✓ |    | 8 |   |    |   |    |
| T | 4  | ✓ |    | 7 |   |    |   |    |
| V | 5  | ✓ |    | 6 | ✓ |    |   |    |
| W | 6  |   |    | 5 | ✓ |    |   |    |
| R | 7  |   |    | 4 |   |    |   |    |
| Y | 8  |   |    | 3 | ✓ |    |   |    |
| S | 9  |   | ✓  | 2 | ✓ | ✓  |   |    |
| R | 10 |   |    | 1 |   |    |   |    |

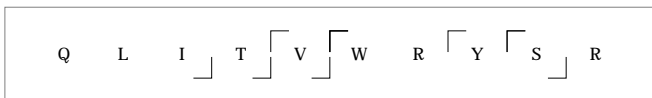



dbValid true IGQGYK PHOS(1) 1. 744. 1.32801 5.03363 100. ? 1698.  
 S\_Acido\_new%gi|68567363|gb|AAY80292.1| IGQGYK%::::PHOS::%sample\_1%compd\_412

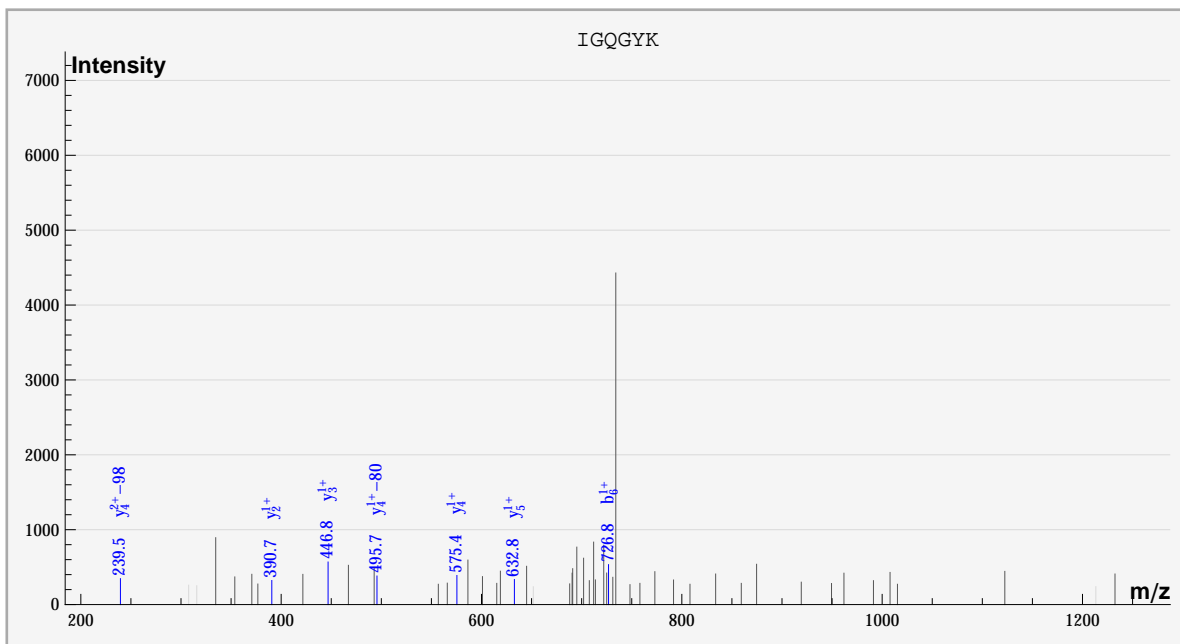

|   | # | b | b* | # | y | y* | P | P* |
|---|---|---|----|---|---|----|---|----|
| I | 1 |   |    |   |   |    |   |    |
| G | 2 |   |    | 5 | ✓ |    |   |    |
| Q | 3 |   |    | 4 | ✓ | ✓  |   |    |
| G | 4 |   |    | 3 | ✓ |    |   |    |
| Y | 5 |   |    | 2 | ✓ |    |   |    |
| K | 6 | ✓ |    | 1 |   |    |   |    |

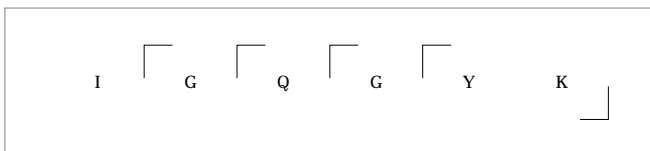

dbValid true KYRVKQPWQMR Oxidation\_M(1),PHOS(1) 2. 744. 0.370677 5.93728 100. ? 1980.  
 S\_Acido\_new%gi68568488|gb|AAY81417.1| KYRVKQPWQMR%::PHOS:::Oxidation\_M:::sample\_1%compd\_668

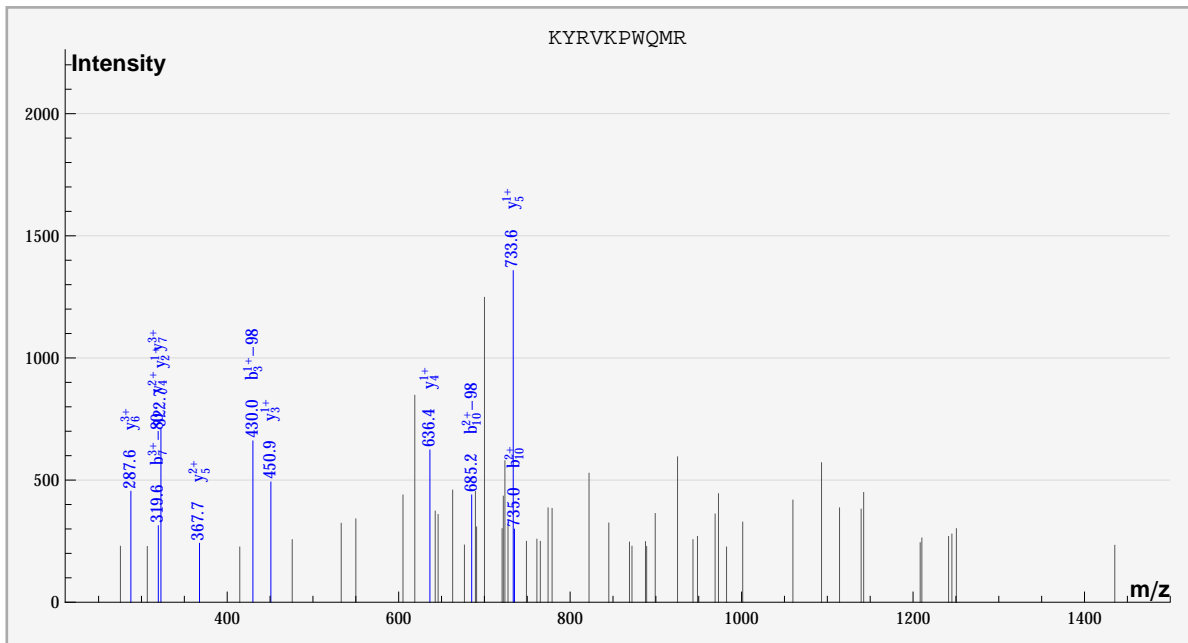

|   | #  | b | b* | # | y | y* | P | P* |
|---|----|---|----|---|---|----|---|----|
| K | 1  |   |    |   |   |    |   |    |
| Y | 2  |   |    | 9 |   |    |   |    |
| R | 3  |   | ✓  | 8 |   |    |   |    |
| V | 4  |   |    | 7 | ✓ |    |   |    |
| K | 5  |   |    | 6 | ✓ |    |   |    |
| P | 6  |   |    | 5 | ✓ |    |   |    |
| W | 7  | ✓ |    | 4 | ✓ |    |   |    |
| Q | 8  |   |    | 3 | ✓ |    |   |    |
| M | 9  |   |    | 2 | ✓ |    |   |    |
| R | 10 | ✓ | ✓  | 1 |   |    |   |    |

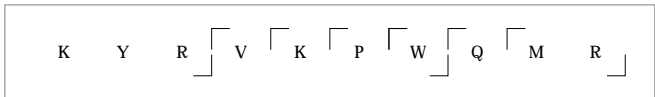

dbValid true AVVIAAGGMGLYR PHOS(1) 2. 744. 0.858752 5.51156 100. ? 2028.  
 S\_Acido\_new%gi|68567414|gb|AAV80343.1| AVVIAAGGMGLYR%:.....:PHOS::%sample\_1%cmpd\_712

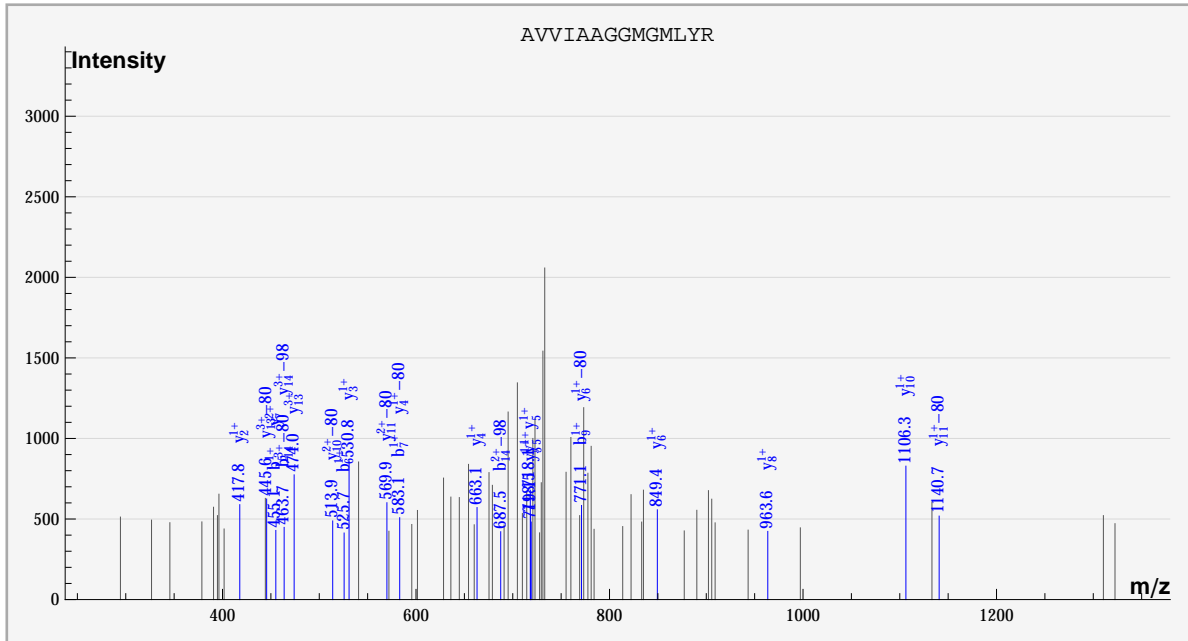

|   | #  | b | b* | #  | y | y* | P | P* |
|---|----|---|----|----|---|----|---|----|
| A | 1  |   |    |    |   |    |   | ✓  |
| V | 2  |   |    | 13 | ✓ | ✓  |   |    |
| V | 3  |   |    | 12 |   |    |   |    |
| I | 4  |   |    | 11 |   | ✓  |   |    |
| A | 5  | ✓ |    | 10 | ✓ | ✓  |   |    |
| A | 6  | ✓ |    | 9  |   |    |   |    |
| G | 7  | ✓ |    | 8  | ✓ |    |   |    |
| G | 8  |   |    | 7  | ✓ |    |   |    |
| M | 9  | ✓ |    | 6  | ✓ | ✓  |   |    |
| G | 10 |   |    | 5  | ✓ |    |   |    |
| M | 11 |   |    | 4  | ✓ | ✓  |   |    |
| L | 12 |   |    | 3  | ✓ |    |   |    |
| Y | 13 |   |    | 2  | ✓ |    |   |    |
| R | 14 | ✓ |    | 1  |   |    |   |    |

「 A 」 「 V 」 「 V 」 「 I 」 「 A 」 「 A 」 「 G 」 「 G 」 「 M 」 「 G 」 「 M 」 「 L 」 「 Y 」 「 R 」

dbValid true DVNTVILGSTAYR PHOS(1) 2. 744. 0.858322 5.53857 100. ? 3582.  
 S\_Acido\_new%gi|68568645|gb|AA81574.1| DVNTVILGSTAYR%:::PHOS:::sample\_1%compd\_2130

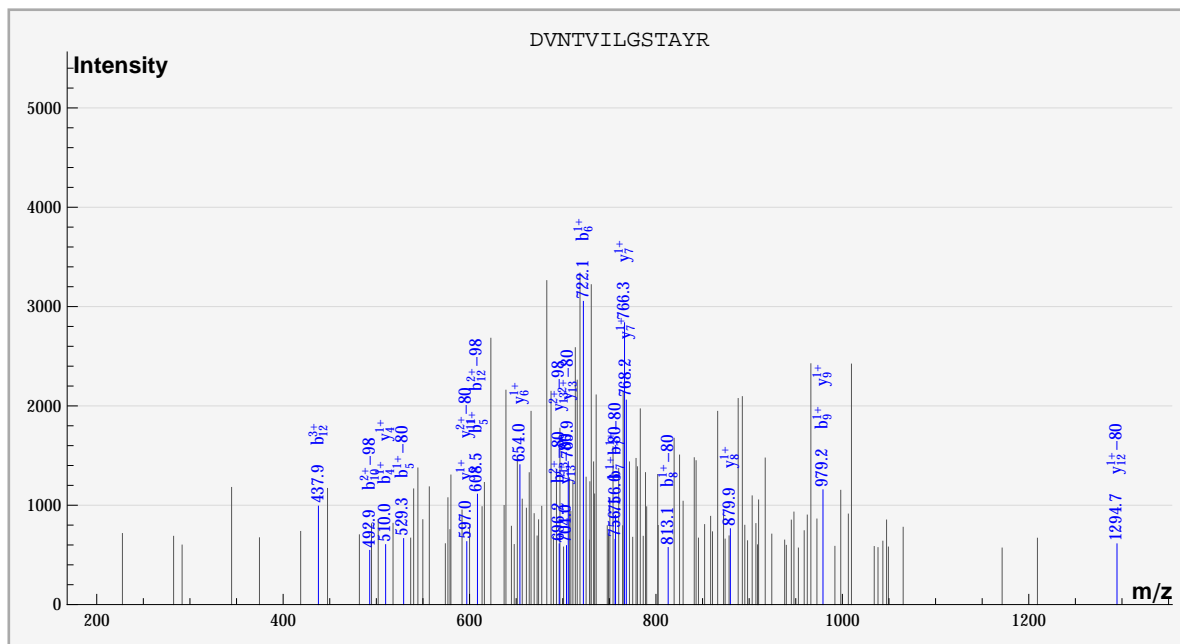

|   | #  | b | b* | #  | y | y* | P | P* |
|---|----|---|----|----|---|----|---|----|
| D | 1  |   |    |    |   |    |   | ✓  |
| V | 2  |   |    | 12 |   |    |   | ✓  |
| N | 3  |   |    | 11 |   |    |   | ✓  |
| T | 4  | ✓ |    | 10 |   |    |   |    |
| V | 5  | ✓ | ✓  | 9  |   |    |   | ✓  |
| I | 6  | ✓ |    | 8  |   |    |   | ✓  |
| L | 7  |   | ✓  | 7  |   |    |   | ✓  |
| G | 8  |   | ✓  | 6  |   |    |   | ✓  |
| S | 9  | ✓ |    | 5  |   |    |   | ✓  |
| T | 10 |   | ✓  | 4  |   |    |   | ✓  |
| A | 11 |   |    | 3  |   |    |   |    |
| Y | 12 | ✓ | ✓  | 2  |   |    |   |    |
| R | 13 |   | ✓  | 1  |   |    |   |    |

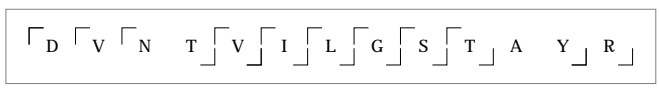

dbValid true SSSVKR PHOS(1) 1. 744. -0.655275 5.7592 100. ? 5016.  
 S\_Acido\_new%gi|68567390|gb|AAY80319.1| SSSVKR%::PHOS::::%sample\_1%compd\_3430

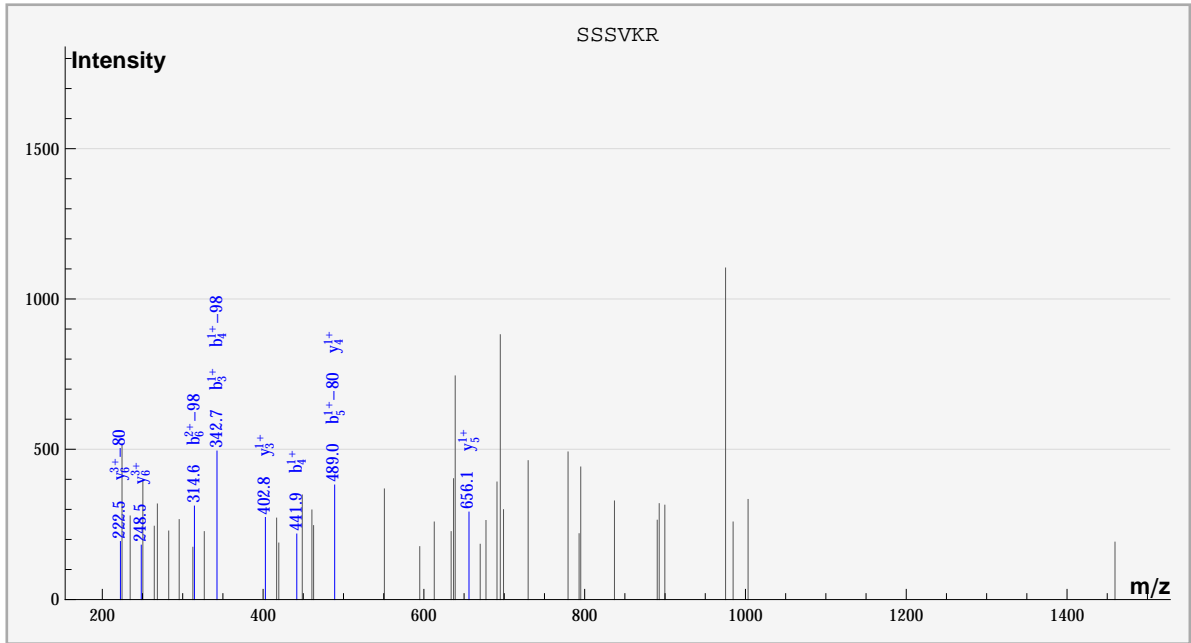

|   | # | b | b* | # | y | y* | P | P* |
|---|---|---|----|---|---|----|---|----|
| S | 1 |   |    |   |   |    | ✓ | ✓  |
| S | 2 |   |    | 5 | ✓ |    |   |    |
| S | 3 | ✓ |    | 4 | ✓ |    |   |    |
| V | 4 | ✓ | ✓  | 3 | ✓ |    |   |    |
| K | 5 |   | ✓  | 2 |   |    |   |    |
| R | 6 |   | ✓  | 1 |   |    |   |    |

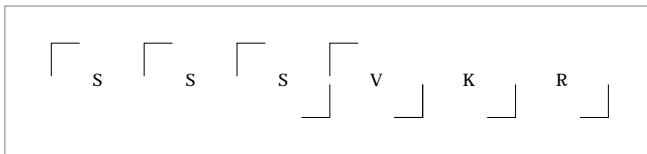

dbValid true MVSAIVLAGGYATR PHOS(1) 2. 744.61 0.257632 5.71195 100. ? 1962.  
 S\_Acido\_new%gi|68566686|gb|AA79615.1| MVSAIVLAGGYATR%:::PHOS::%sample\_1%cmpd\_632

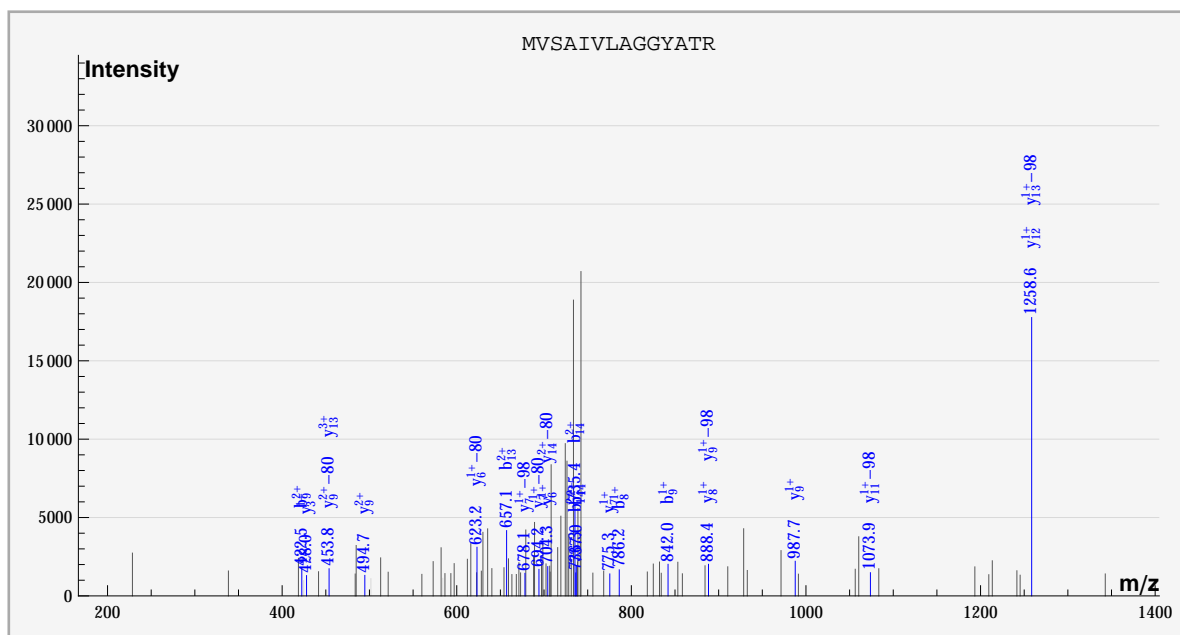

|   | #  | b | b* | #  | y | y* | P | P* |
|---|----|---|----|----|---|----|---|----|
| M | 1  |   |    |    |   |    |   | ✓  |
| V | 2  |   |    | 13 | ✓ | ✓  |   |    |
| S | 3  |   |    | 12 | ✓ |    |   |    |
| A | 4  |   |    | 11 |   | ✓  |   |    |
| I | 5  |   |    | 10 |   |    |   |    |
| V | 6  |   |    | 9  | ✓ | ✓  |   |    |
| L | 7  |   |    | 8  | ✓ |    |   |    |
| A | 8  | ✓ |    | 7  | ✓ | ✓  |   |    |
| G | 9  | ✓ |    | 6  | ✓ | ✓  |   |    |
| G | 10 |   |    | 5  |   |    |   |    |
| Y | 11 |   |    | 4  |   |    |   |    |
| A | 12 |   |    | 3  | ✓ |    |   |    |
| T | 13 | ✓ |    | 2  |   |    |   |    |
| R | 14 | ✓ |    | 1  |   |    |   |    |

「M」 「V」 「S」 「A」 「I」 「V」 「L」 「A」 「G」 「G」 「Y」 「A」 「T」 「R」



dbConflictWinner true KMGISK PHOS(1) 1. 745. -1.64789 5.65159 100. ?  
 1314. S\_Acido\_new%gi|68568641|gb|AAY81570.1| KMGISK%:::::PHOS::%sample\_3%compd\_71

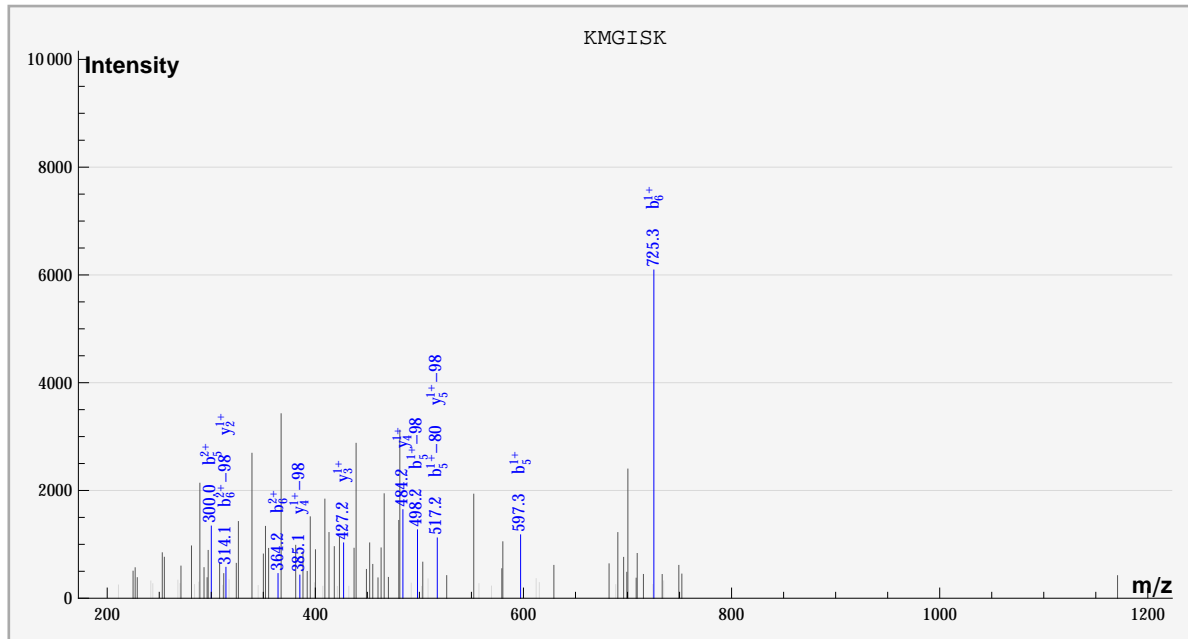

|   | # | b | b* | # | y | y* | P | P* |
|---|---|---|----|---|---|----|---|----|
| K | 1 |   |    |   |   |    |   |    |
| M | 2 |   |    | 5 |   | ✓  |   |    |
| G | 3 |   |    | 4 | ✓ | ✓  |   |    |
| I | 4 |   |    | 3 | ✓ |    |   |    |
| S | 5 | ✓ | ✓  | 2 | ✓ |    |   |    |
| K | 6 | ✓ | ✓  | 1 |   |    |   |    |

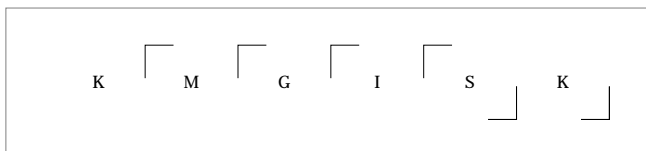

dbConflictWinner true KMGISK PHOS(1) 1. 745. -1.64789 5.39131 100. ?  
 1518. S\_Acido\_new%gi|68568641|gb|AAY81570.1| KMGISK%:::::PHOS::%sample\_3%cmpd\_231

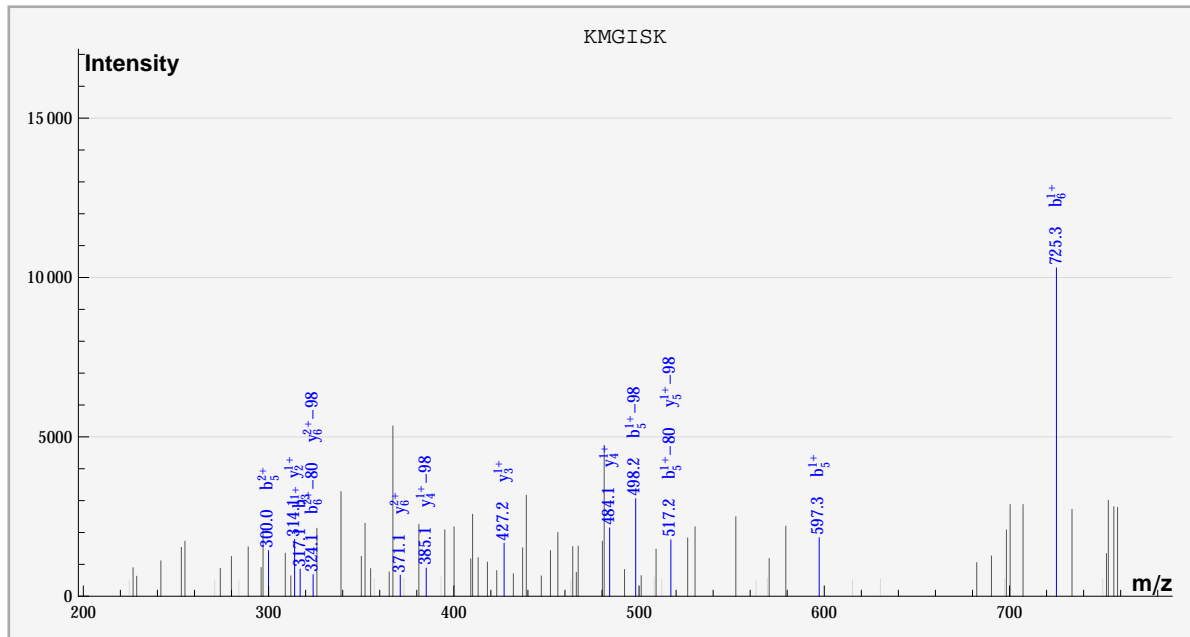

|   | # | b | b* | # | y | y* | P | P* |
|---|---|---|----|---|---|----|---|----|
| K | 1 |   |    |   |   |    | ✓ | ✓  |
| M | 2 |   |    | 5 |   | ✓  |   |    |
| G | 3 | ✓ |    | 4 | ✓ | ✓  |   |    |
| I | 4 |   |    | 3 | ✓ |    |   |    |
| S | 5 | ✓ | ✓  | 2 | ✓ |    |   |    |
| K | 6 | ✓ | ✓  | 1 |   |    |   |    |

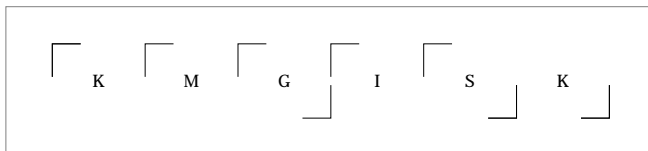

dbValid true KMGISK PHOS(1) 1. 745. -1.64789 5.06395 100. ? 2634.  
 S\_Acido\_new%gi|68568641|gb|AAY81570.1| KMGISK%::::PHOS::%sample\_3%cmpd\_1175

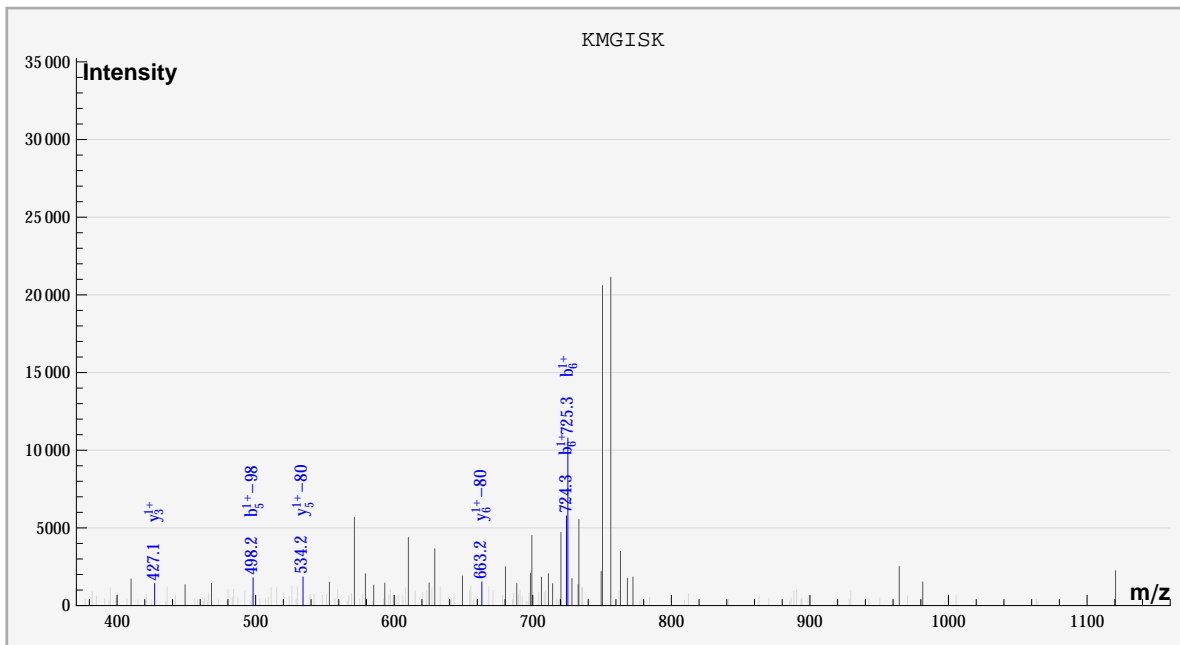

|   | # | b | b* | # | y | y* | P | P* |
|---|---|---|----|---|---|----|---|----|
| K | 1 |   |    |   |   |    |   | ✓  |
| M | 2 |   |    | 5 |   | ✓  |   |    |
| G | 3 |   |    | 4 |   |    |   |    |
| I | 4 |   |    | 3 |   | ✓  |   |    |
| S | 5 |   | ✓  | 2 |   |    |   |    |
| K | 6 | ✓ |    | 1 |   |    |   |    |

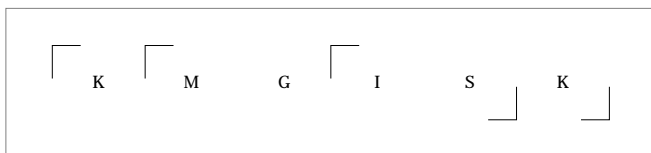

dbValid true KMGISK PHOS(1) 1. 745. -1.64789 5.00951 100. ? 2646.  
 S\_Acido\_new%gi|68568641|gb|AAY81570.1| KMGISK%:::::PHOS:::sample\_3%compd\_1185

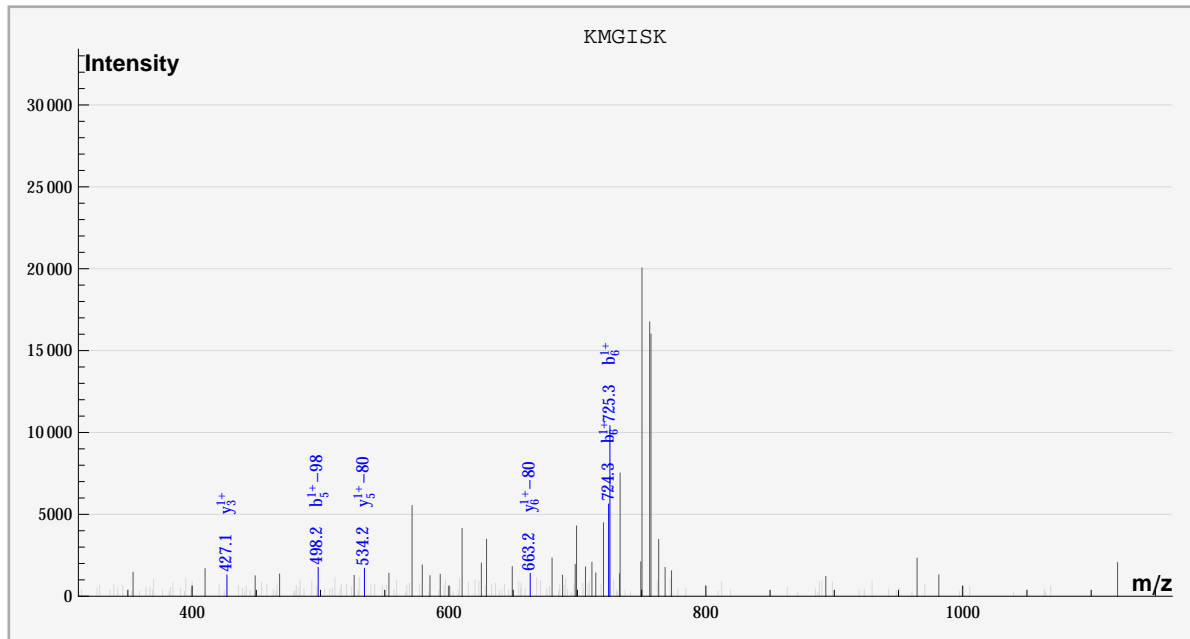

|   | # | b | b* | # | y | y* | P | P* |
|---|---|---|----|---|---|----|---|----|
| K | 1 |   |    |   |   |    |   | ✓  |
| M | 2 |   |    | 5 |   | ✓  |   |    |
| G | 3 |   |    | 4 |   |    |   |    |
| I | 4 |   |    | 3 |   | ✓  |   |    |
| S | 5 |   | ✓  | 2 |   |    |   |    |
| K | 6 | ✓ |    | 1 |   |    |   |    |

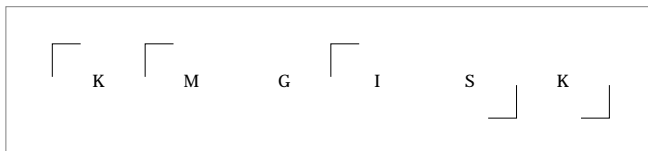

dbValid true KTLSSK PHOS(1) 1. 745. -1.63013 5.1362 100. ? 3030.  
 S\_Acido\_new%gi|68568179|gb|AAY81108.1| KTLSSK%:::PHOS:::%sample\_3%cmpd\_1510

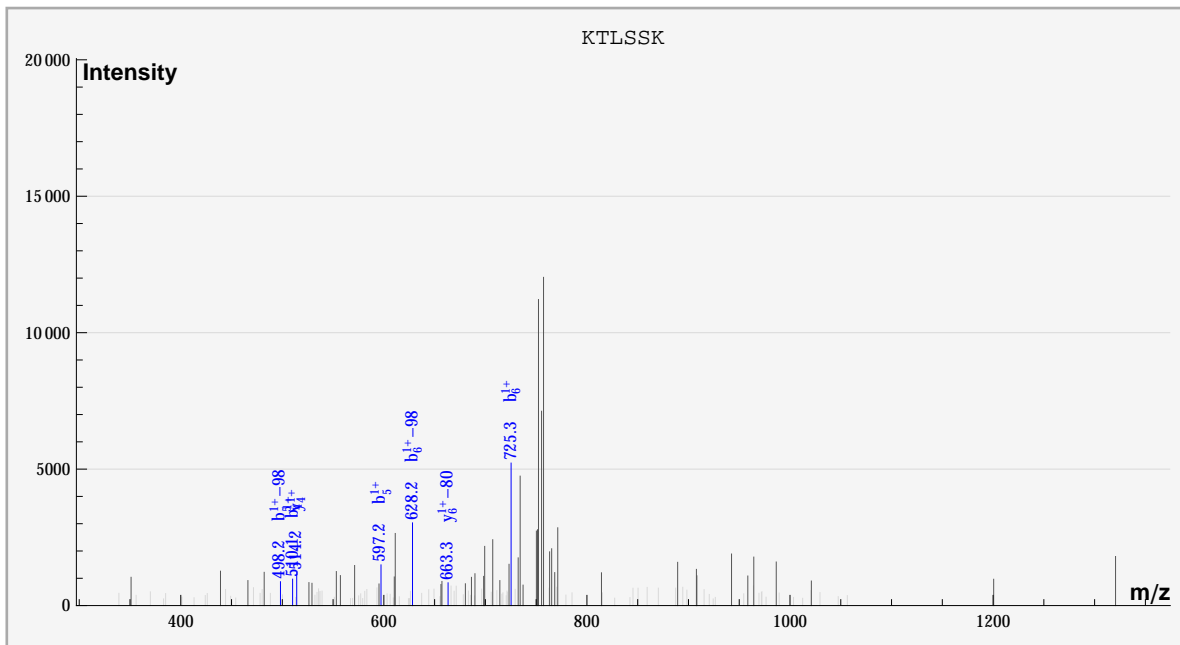

|   | # | b | b* | # | y | y* | P | P* |
|---|---|---|----|---|---|----|---|----|
| K | 1 |   |    |   |   |    |   | ✓  |
| T | 2 |   |    | 5 |   |    |   |    |
| L | 3 |   |    | 4 | ✓ |    |   |    |
| S | 4 | ✓ |    | 3 |   |    |   |    |
| S | 5 | ✓ | ✓  | 2 |   |    |   |    |
| K | 6 | ✓ | ✓  | 1 |   |    |   |    |

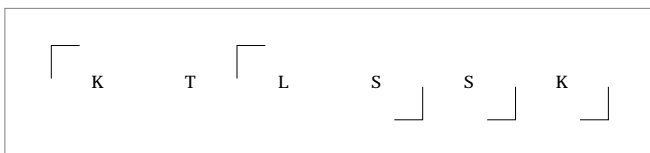

dbValid true KTLSSK PHOS(1) 1. 745. -1.63013 5.13274 100. ? 3042.  
 S\_Acido\_new%gi|68568179|gb|AAY81108.1| KTLSSK%:::PHOS:::sample\_3%cmpd\_1520

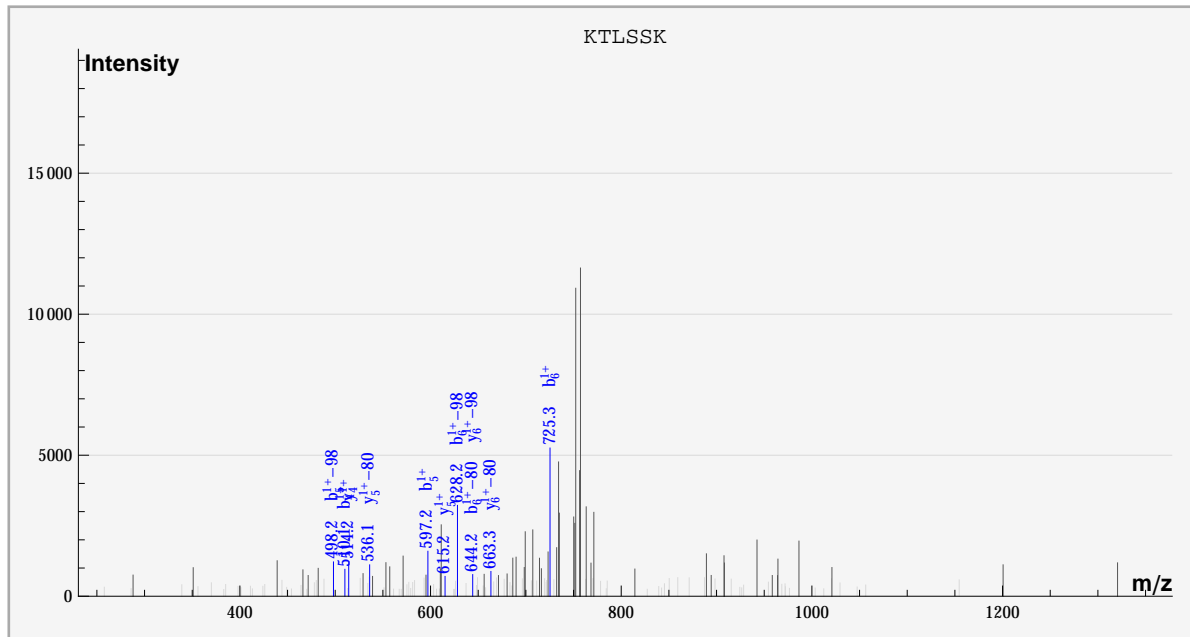

|   | # | b | b* | # | y | y* | P | P* |
|---|---|---|----|---|---|----|---|----|
| K | 1 |   |    |   |   |    |   | ✓  |
| T | 2 |   |    | 5 | ✓ | ✓  |   |    |
| L | 3 |   |    | 4 | ✓ |    |   |    |
| S | 4 | ✓ |    | 3 |   |    |   |    |
| S | 5 | ✓ | ✓  | 2 |   |    |   |    |
| K | 6 | ✓ | ✓  | 1 |   |    |   |    |

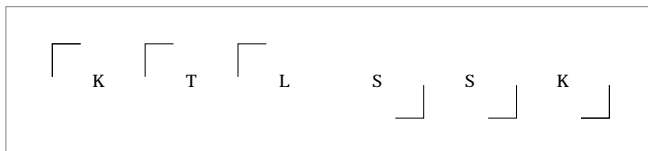

dbValid true RVKMLYSILQGT PHOS(1) 2. 746. -1.11417 5.36971 100. ? 2478.  
 S\_Acido\_new%gi|68567308|gb|AAY80237.1| RVKMLYSILQGT%:::PHOS:%sample\_3%cmpd\_1045

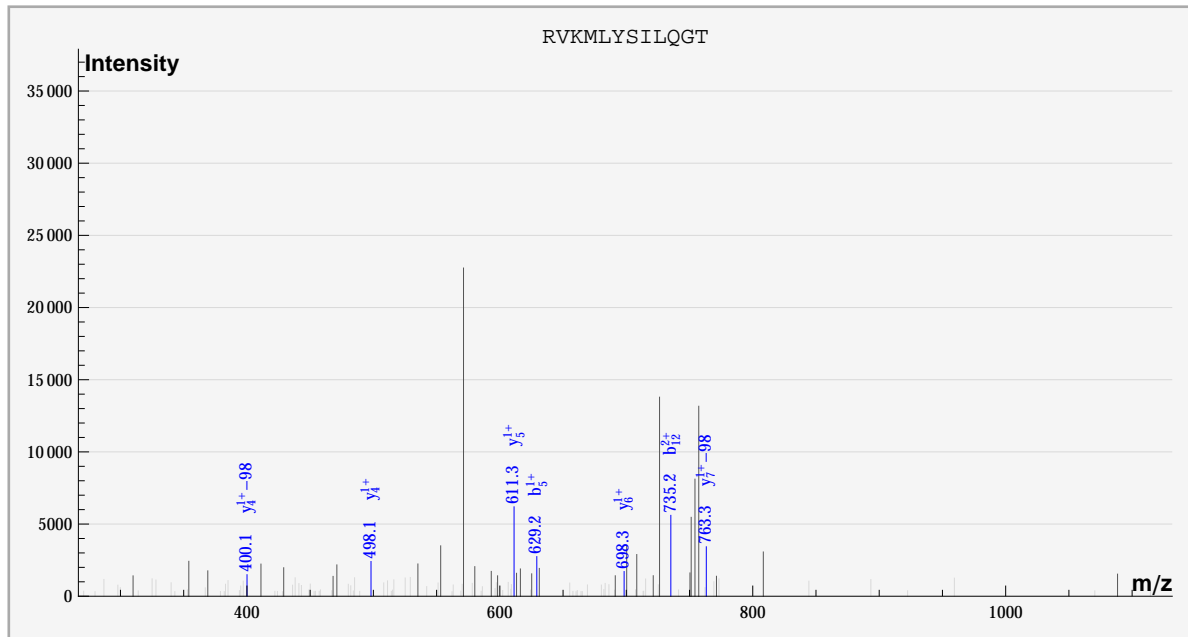

|   | #  | b | b* | #  | y | y* | P | P* |
|---|----|---|----|----|---|----|---|----|
| R | 1  |   |    |    |   |    |   |    |
| V | 2  |   |    | 11 |   |    |   |    |
| K | 3  |   |    | 10 |   |    |   |    |
| M | 4  |   |    | 9  |   |    |   |    |
| L | 5  | ✓ |    | 8  |   |    |   |    |
| Y | 6  |   |    | 7  |   | ✓  |   |    |
| S | 7  |   |    | 6  | ✓ |    |   |    |
| I | 8  |   |    | 5  | ✓ |    |   |    |
| L | 9  |   |    | 4  | ✓ | ✓  |   |    |
| Q | 10 |   |    | 3  |   |    |   |    |
| G | 11 |   |    | 2  |   |    |   |    |
| T | 12 | ✓ |    | 1  |   |    |   |    |

R V K M L Y S I L Q G T

dbValid true KGMSVAAALAAKSK PHOS(2) 2. 746. 0.853322 5.58199 100. ? 2502.  
 S\_Acido\_new%gi|68567491|gb|AAV80420.1| KGMSVAAALAAKSK%:::PHOS:::PHOS::%sample\_1%compd\_1146

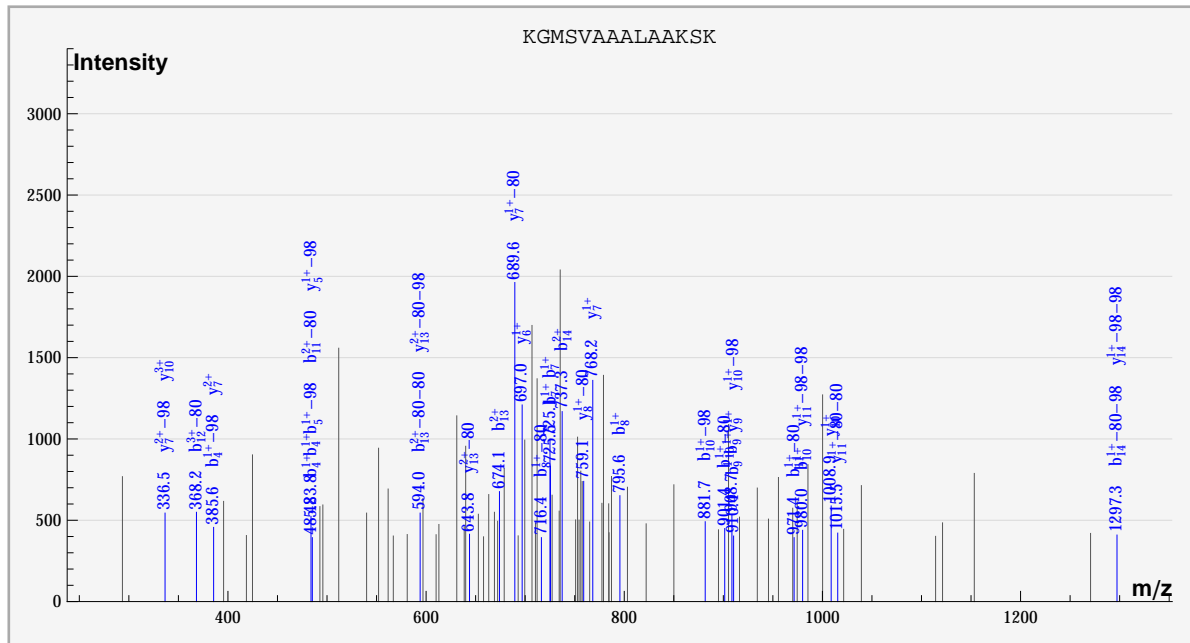

|   | #  | b | b* | #  | y | y* | P | P* |
|---|----|---|----|----|---|----|---|----|
| K | 1  |   |    |    |   |    |   | ✓  |
| G | 2  |   |    | 13 |   | ✓  |   |    |
| M | 3  |   |    | 12 |   |    |   |    |
| S | 4  | ✓ | ✓  | 11 |   | ✓  |   |    |
| V | 5  |   | ✓  | 10 | ✓ | ✓  |   |    |
| A | 6  |   |    | 9  | ✓ |    |   |    |
| A | 7  | ✓ |    | 8  |   | ✓  |   |    |
| A | 8  | ✓ | ✓  | 7  | ✓ | ✓  |   |    |
| L | 9  | ✓ |    | 6  | ✓ |    |   |    |
| A | 10 | ✓ | ✓  | 5  |   | ✓  |   |    |
| A | 11 |   | ✓  | 4  |   |    |   |    |
| K | 12 |   | ✓  | 3  |   |    |   |    |
| S | 13 | ✓ | ✓  | 2  |   |    |   |    |
| K | 14 | ✓ | ✓  | 1  |   |    |   |    |

[K][G][M][S][V][A][A][A][L][A][A][K][S][K]



dbValid true STNLVVYHLKR PHOS(2) 2. 747. -1.64819 5.27117 100. ? 3324.

S\_Acido\_new%gi|68566932|gb|AA79861.1| STNLVVYHLKR%:PHOS:PHOS:.....:sample\_3%cmpd\_1755

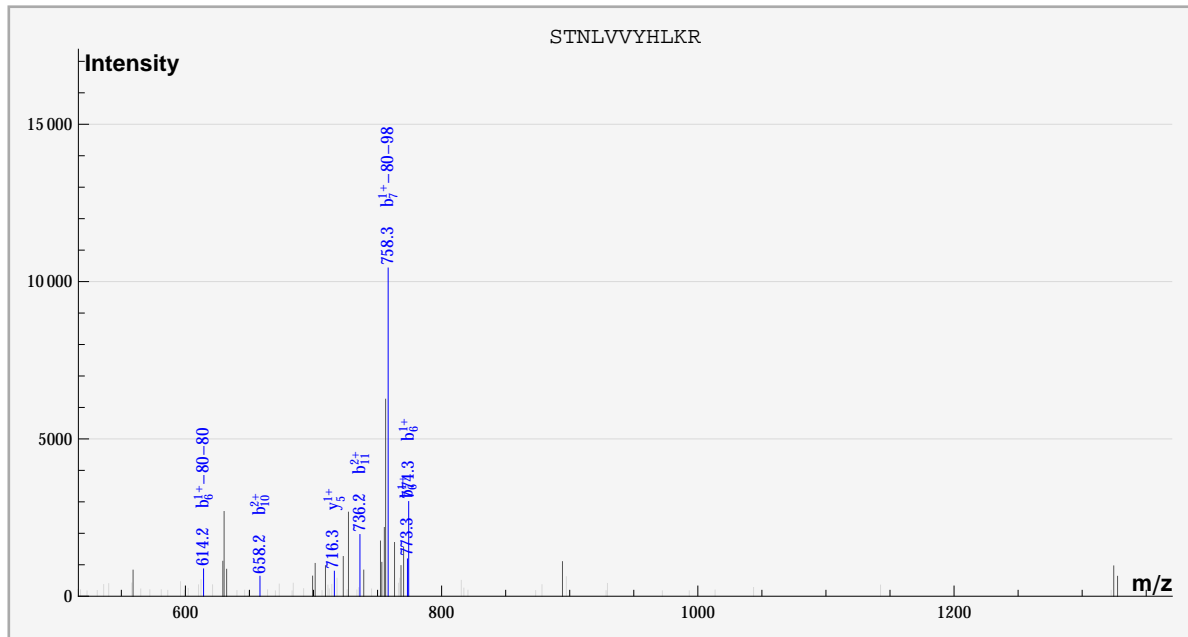

|   | #  | b | b* | #  | y | y* | P | P* |
|---|----|---|----|----|---|----|---|----|
| S | 1  |   |    |    |   |    |   |    |
| T | 2  |   |    | 10 |   |    |   |    |
| N | 3  |   |    | 9  |   |    |   |    |
| L | 4  |   |    | 8  |   |    |   |    |
| V | 5  |   |    | 7  |   |    |   |    |
| V | 6  | ✓ | ✓  | 6  |   |    |   |    |
| Y | 7  |   | ✓  | 5  | ✓ |    |   |    |
| H | 8  |   |    | 4  |   |    |   |    |
| L | 9  |   |    | 3  |   |    |   |    |
| K | 10 | ✓ |    | 2  |   |    |   |    |
| R | 11 | ✓ |    | 1  |   |    |   |    |

S T N L V V Y H L K R

dbValid true YNTGINAISWAK PHOS(2) 2. 748. 1.31235 5.38211 100. ? 2964.  
 S\_Acido\_new%gi|68567962|gb|AAy80891.1| YNTGINAISWAK%:PHOS:.....PHOS:....%sample\_1%compd\_1570

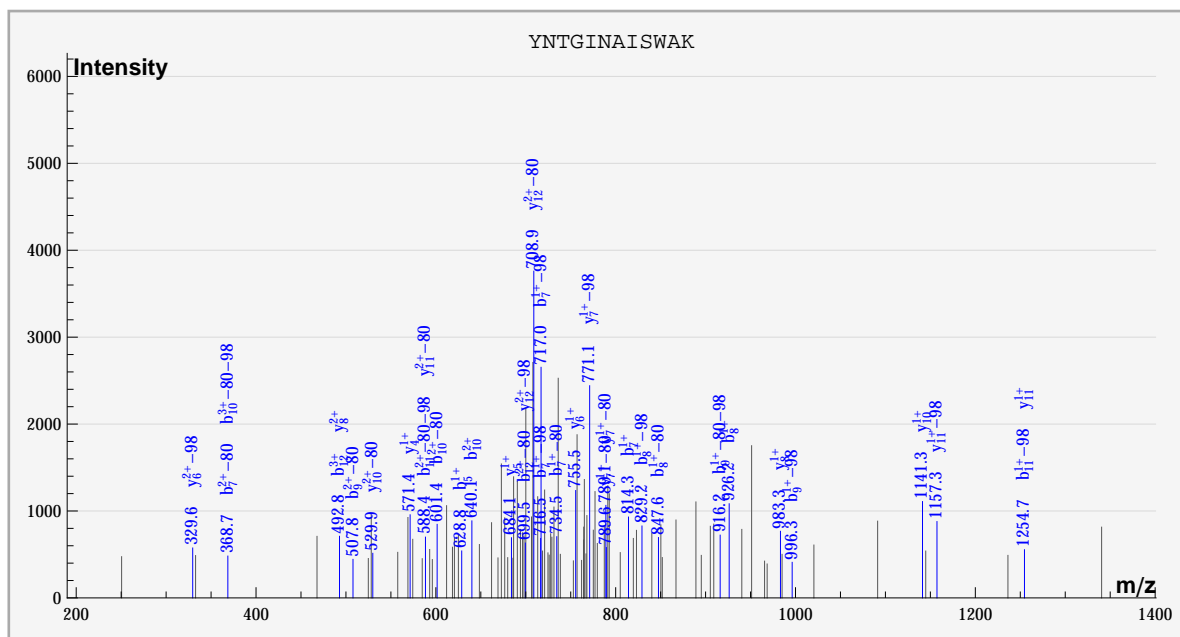

|   | #  | b | b* | #  | y | y* | P | P* |
|---|----|---|----|----|---|----|---|----|
| Y | 1  |   |    |    |   |    |   | ✓  |
| N | 2  |   |    | 11 | ✓ | ✓  |   |    |
| T | 3  |   |    | 10 | ✓ | ✓  |   |    |
| G | 4  |   |    | 9  |   |    |   |    |
| I | 5  | ✓ |    | 8  | ✓ |    |   |    |
| N | 6  |   |    | 7  |   | ✓  |   |    |
| A | 7  | ✓ | ✓  | 6  | ✓ | ✓  |   |    |
| I | 8  | ✓ | ✓  | 5  | ✓ |    |   |    |
| S | 9  |   | ✓  | 4  | ✓ |    |   |    |
| W | 10 | ✓ | ✓  | 3  |   |    |   |    |
| A | 11 |   | ✓  | 2  |   |    |   |    |
| K | 12 | ✓ | ✓  | 1  |   |    |   |    |

Y N T G I N A I S W A K

dbValid true GIYVSK PHOS(1) 1. 748. -1.6516 5.07185 100. ? 3168.  
 S\_Acido\_new%gi|68567993|gb|AAY80922.1| GIYVSK%:::PHOS:::%sample\_1%compd\_1758

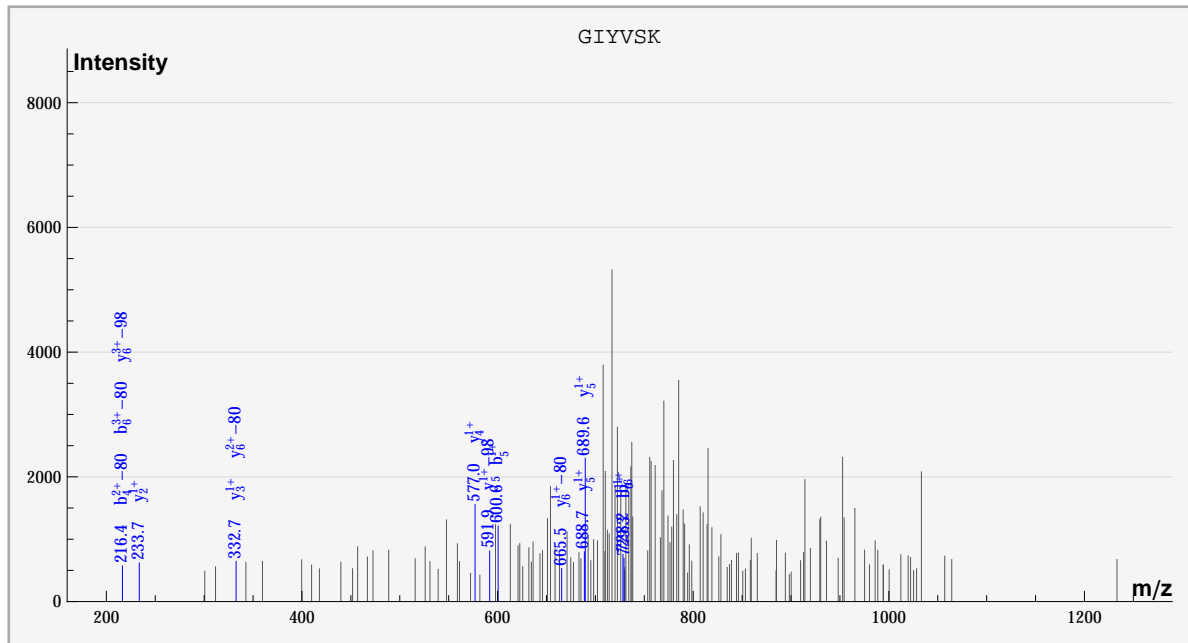

|   | # | b | b* | # | y | y* | P | P* |
|---|---|---|----|---|---|----|---|----|
| G | 1 |   |    |   |   |    |   | ✓  |
| I | 2 |   |    | 5 | ✓ | ✓  |   |    |
| Y | 3 |   |    | 4 | ✓ |    |   |    |
| V | 4 |   | ✓  | 3 | ✓ |    |   |    |
| S | 5 | ✓ |    | 2 | ✓ |    |   |    |
| K | 6 | ✓ | ✓  | 1 |   |    |   |    |

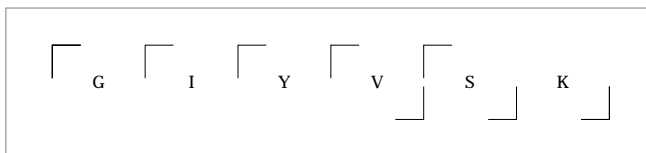

dbValid true DPSDPLVMSISPR PHOS(1) 2. 748. -0.661093 5.9591 100. ? 3234.  
 S\_Acido\_new%gi|68567726|gb|AA80655.1| DPSDPLVMSISPR%:::PHOS:::sample\_1%compd\_1813

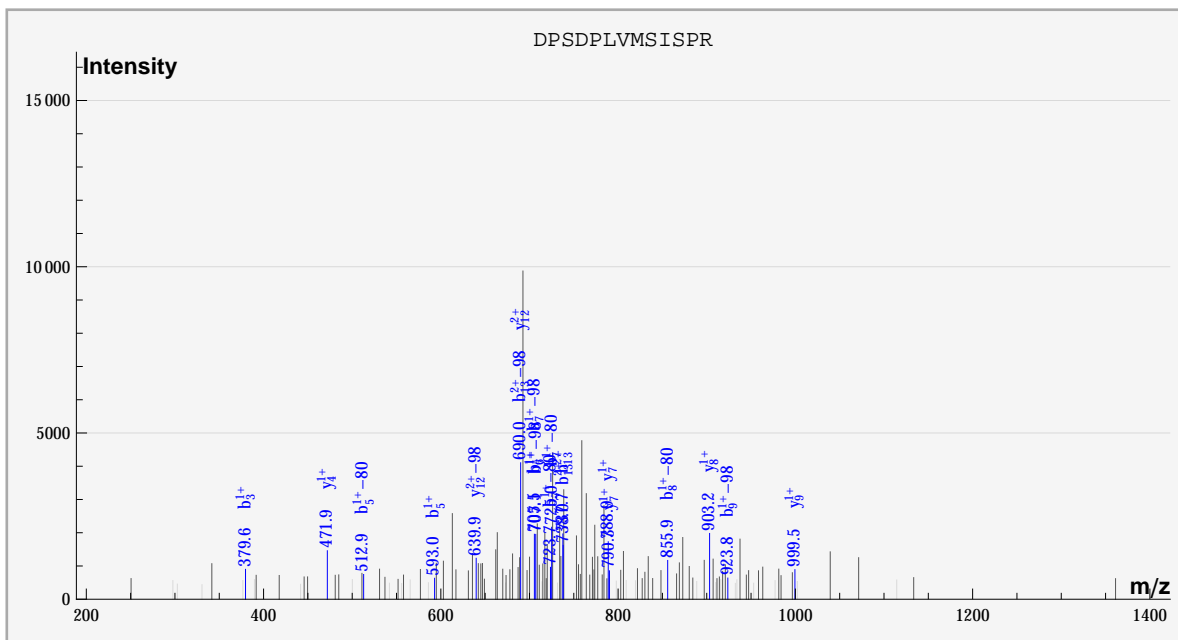

|   | #  | b | b* | #  | y | y* | P | P* |
|---|----|---|----|----|---|----|---|----|
| D | 1  |   |    |    |   |    |   |    |
| P | 2  |   |    | 12 | ✓ | ✓  |   |    |
| S | 3  | ✓ |    | 11 |   |    |   |    |
| D | 4  |   |    | 10 |   |    |   |    |
| P | 5  | ✓ | ✓  | 9  | ✓ |    |   |    |
| L | 6  | ✓ |    | 8  | ✓ |    |   |    |
| V | 7  |   | ✓  | 7  | ✓ |    |   |    |
| M | 8  |   | ✓  | 6  |   |    |   |    |
| S | 9  |   | ✓  | 5  |   |    |   |    |
| I | 10 |   |    | 4  | ✓ |    |   |    |
| S | 11 |   |    | 3  |   |    |   |    |
| P | 12 |   |    | 2  |   |    |   |    |
| R | 13 | ✓ | ✓  | 1  |   |    |   |    |

D [ P S ] D [ P [ L [ V ] M ] S [ I S P R ]

dbValid true YKGYATDTTR PHOS(4) 2. 748. 0.220807 4.999 100. ? 4278.

S\_Acido\_new%gii68567443|gb|AAy80372.1| YKGYATDTTR%:PHOS::PHOS::PHOS::PHOS::%sample\_1%cmpd\_2765

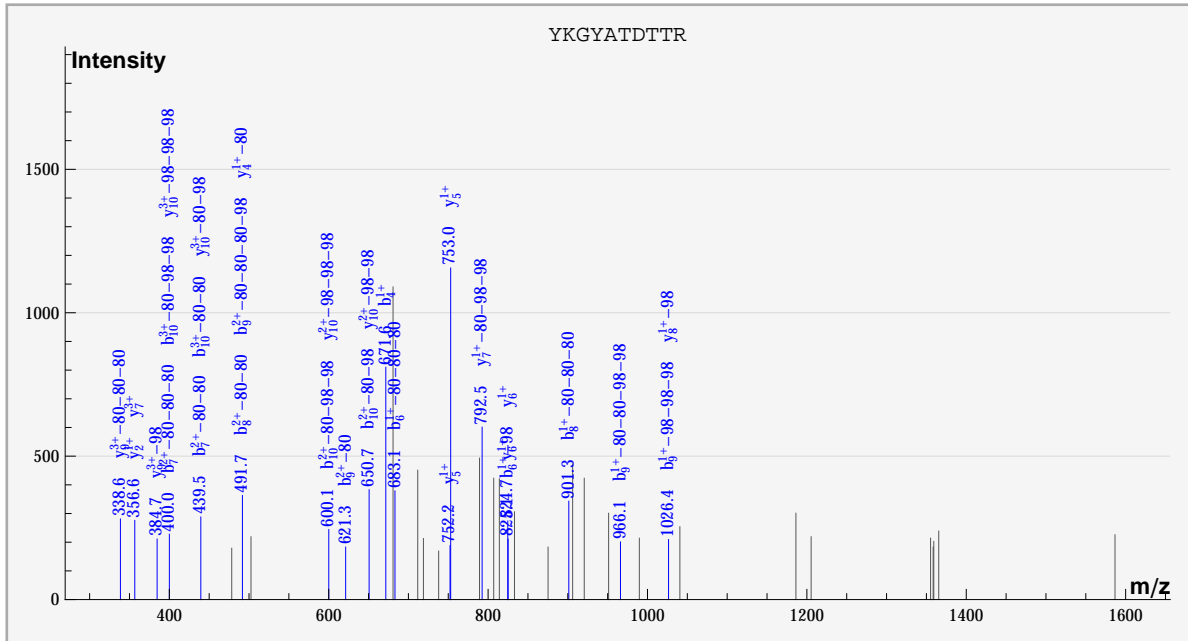

|   | #  | b | b* | # | y | y* | P | P* |
|---|----|---|----|---|---|----|---|----|
| Y | 1  |   |    |   |   |    |   | ✓  |
| K | 2  |   |    | 9 |   |    | ✓ |    |
| G | 3  |   |    | 8 |   |    | ✓ |    |
| Y | 4  | ✓ |    | 7 | ✓ | ✓  |   |    |
| A | 5  |   |    | 6 | ✓ |    |   |    |
| T | 6  |   | ✓  | 5 | ✓ |    |   |    |
| D | 7  |   | ✓  | 4 |   | ✓  |   |    |
| T | 8  |   | ✓  | 3 |   |    |   |    |
| T | 9  |   | ✓  | 2 |   | ✓  |   |    |
| R | 10 |   | ✓  | 1 |   |    |   |    |

Y K G Y A T D T T R

dbValid true YYEMYSRK PHOS(3) 2. 749. -1.76593 5.08307 100. ? 1680.  
 S\_Acido\_new%gi|68567117|gb|AAY80046.1| YYEMYSRK%:PHOS:PHOS::PHOS:::sample\_3%compd\_367

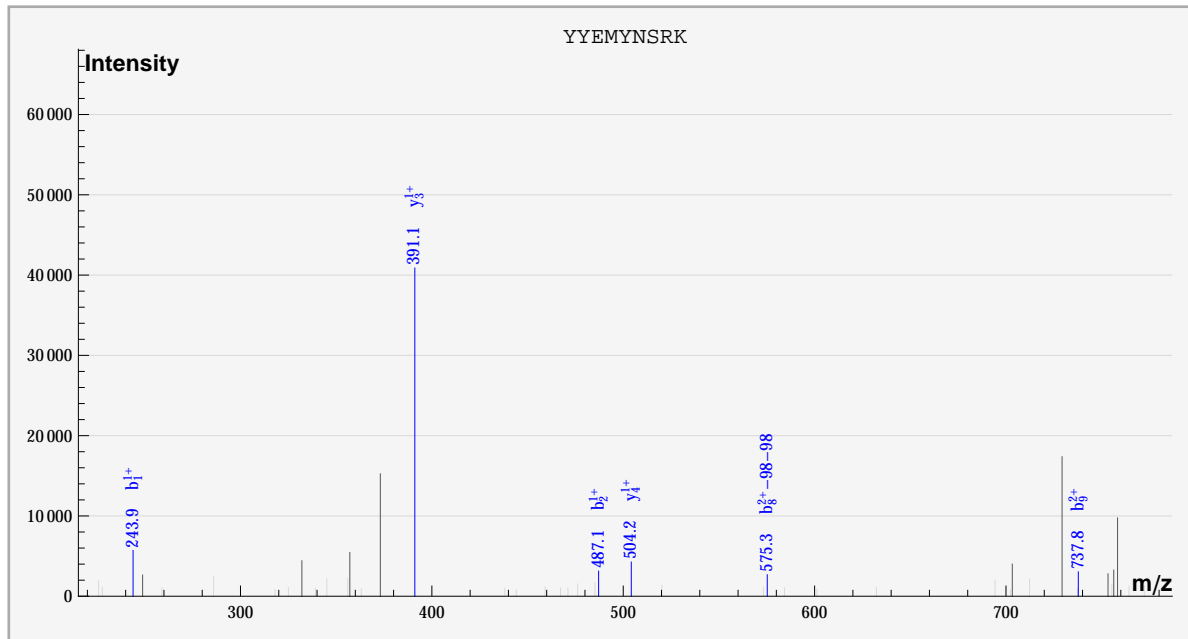

|   | # | b | b* | # | y | y* | P | P* |
|---|---|---|----|---|---|----|---|----|
| Y | 1 | ✓ |    |   |   |    |   |    |
| Y | 2 | ✓ |    | 8 |   |    |   |    |
| E | 3 |   |    | 7 |   |    |   |    |
| M | 4 |   |    | 6 |   |    |   |    |
| Y | 5 |   |    | 5 |   |    |   |    |
| N | 6 |   |    | 4 | ✓ |    |   |    |
| S | 7 |   |    | 3 | ✓ |    |   |    |
| R | 8 |   | ✓  | 2 |   |    |   |    |
| K | 9 | ✓ |    | 1 |   |    |   |    |

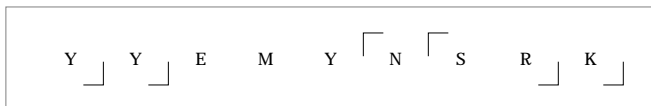

dbValid true CYVPLVIGLTER Cys\_CAM(1),PHOS(1) 2. 749. 1.37001 5.04058 100. ? 2820.  
 S\_Acido\_new%gil68566534|gb|AA79463.1| CYVPLVIGLTER%:Cys\_CAM:PHOS:.....%sample\_1%compd\_1439

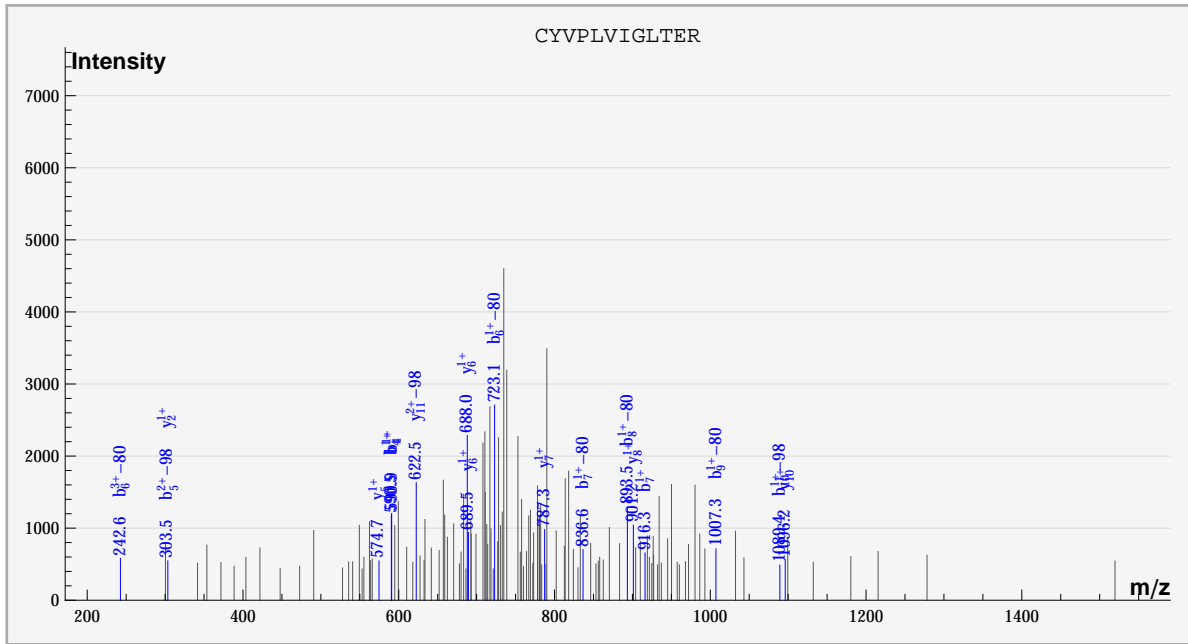

|   | #  | b | b* | #  | y | y* | P | P* |
|---|----|---|----|----|---|----|---|----|
| C | 1  |   |    |    |   |    |   |    |
| Y | 2  |   |    | 11 |   | ✓  |   |    |
| V | 3  |   |    | 10 | ✓ |    |   |    |
| P | 4  | ✓ |    | 9  |   |    |   |    |
| L | 5  |   | ✓  | 8  | ✓ |    |   |    |
| V | 6  |   | ✓  | 7  | ✓ |    |   |    |
| I | 7  | ✓ | ✓  | 6  | ✓ |    |   |    |
| G | 8  |   | ✓  | 5  | ✓ |    |   |    |
| L | 9  |   | ✓  | 4  |   |    |   |    |
| T | 10 |   | ✓  | 3  |   |    |   |    |
| E | 11 |   |    | 2  | ✓ |    |   |    |
| R | 12 |   |    | 1  |   |    |   |    |

C Y V P L V I G L T E R

dbValid true RRMGTVDYFIR PHOS(1) 2. 749. -1.64223 5.33633 100. ? 3684.  
 S\_Acido\_new%gi|68566856|gb|AA79785.1| RRMGTVDYFIR%::::PHOS:::::sample\_1%compd\_2225

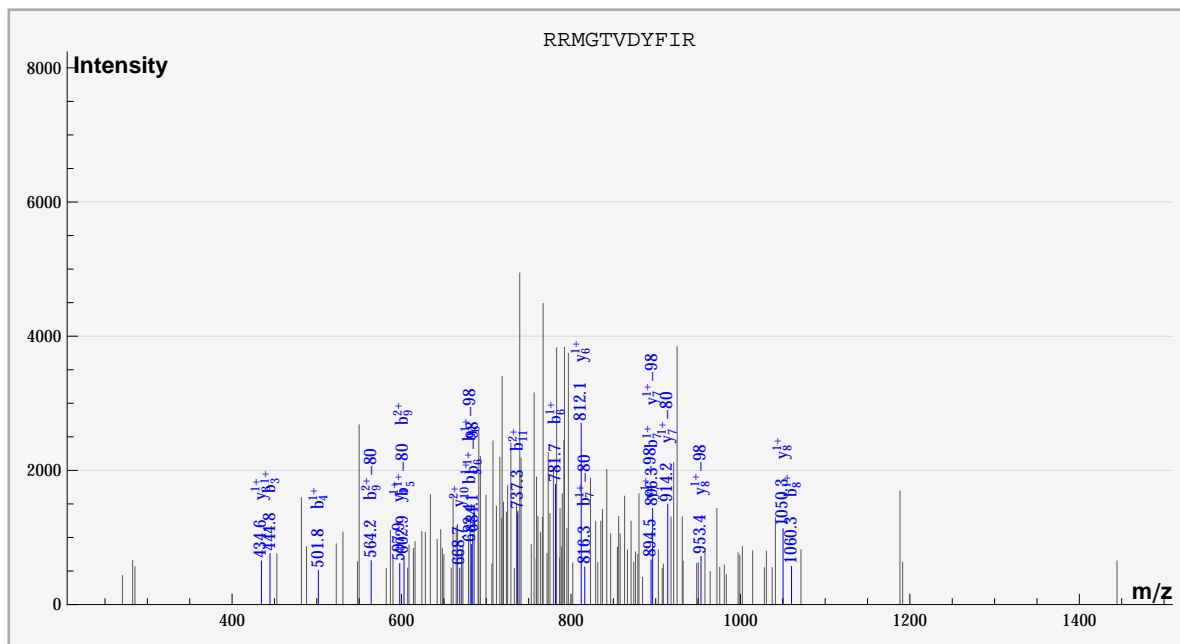

|   | #  | b | b* | #  | y | y* | P | P* |
|---|----|---|----|----|---|----|---|----|
| R | 1  |   |    |    |   |    |   |    |
| R | 2  |   |    | 10 | ✓ |    |   |    |
| M | 3  | ✓ |    | 9  |   |    |   |    |
| G | 4  | ✓ |    | 8  | ✓ | ✓  |   |    |
| T | 5  | ✓ | ✓  | 7  |   | ✓  |   |    |
| V | 6  | ✓ | ✓  | 6  | ✓ |    |   |    |
| D | 7  | ✓ | ✓  | 5  |   |    |   |    |
| Y | 8  | ✓ |    | 4  | ✓ |    |   |    |
| F | 9  | ✓ | ✓  | 3  | ✓ |    |   |    |
| I | 10 |   |    | 2  |   |    |   |    |
| R | 11 | ✓ |    | 1  |   |    |   |    |

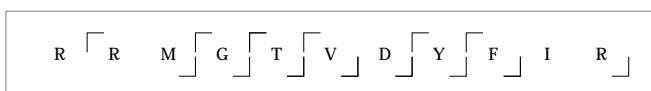



dbValid true VYDELNVTTKR PHOS(2) 2. 749. 0.322917 5.05559 100. ? 3840.

S\_Acido\_new%gi|68567337|gb|AAy80266.1| VYDELNVTTKR%::PHOS:::PHOS:::sample\_1%compd\_2369

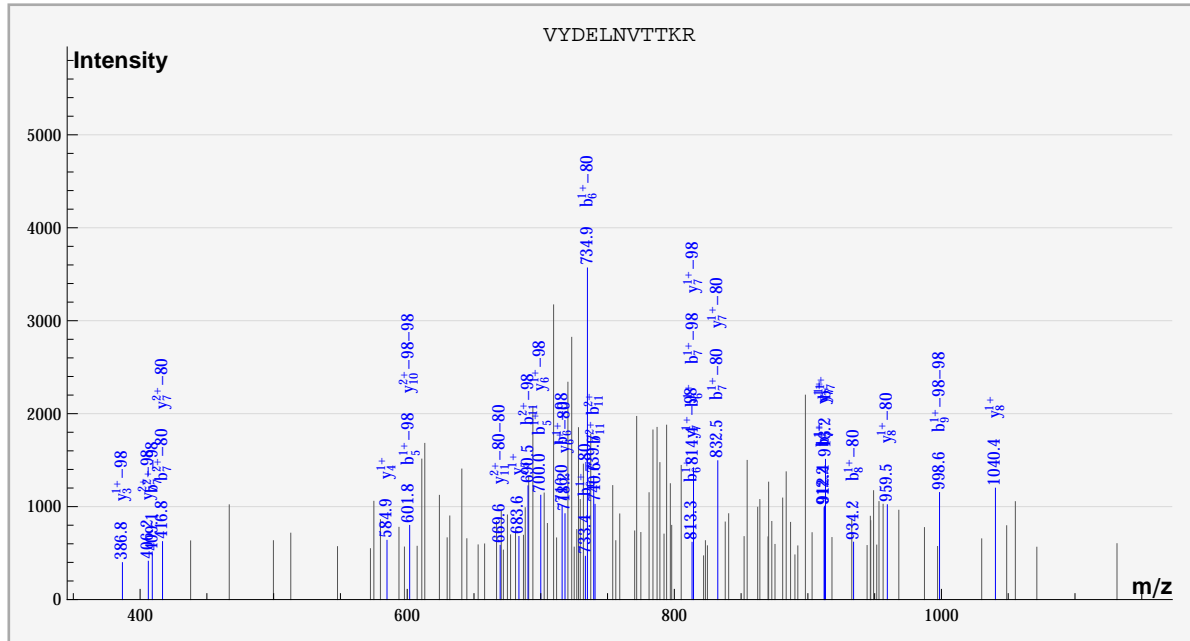

|   | #  | b | b* | #  | y | y* | P | P* |
|---|----|---|----|----|---|----|---|----|
| V | 1  |   |    |    |   |    |   | ✓  |
| Y | 2  |   |    | 10 |   | ✓  |   |    |
| D | 3  |   |    | 9  |   |    |   |    |
| E | 4  |   |    | 8  | ✓ | ✓  |   |    |
| L | 5  | ✓ | ✓  | 7  | ✓ | ✓  |   |    |
| N | 6  | ✓ | ✓  | 6  |   | ✓  |   |    |
| V | 7  | ✓ | ✓  | 5  | ✓ |    |   |    |
| T | 8  |   | ✓  | 4  | ✓ |    |   |    |
| T | 9  |   | ✓  | 3  |   | ✓  |   |    |
| K | 10 |   |    | 2  |   |    |   |    |
| R | 11 | ✓ | ✓  | 1  |   |    |   |    |

V Y D E L N V T T K R

dbValid true SRYSMIGWGRK PHOS(2) 2. 750. 0.814542 5.04003 100. ? 3258.  
 S\_Acido\_new%gil68567826|gb|AAY80755.1| SRYSMIGWGRK%:PHOS::PHOS:::sample\_0%compd\_1660

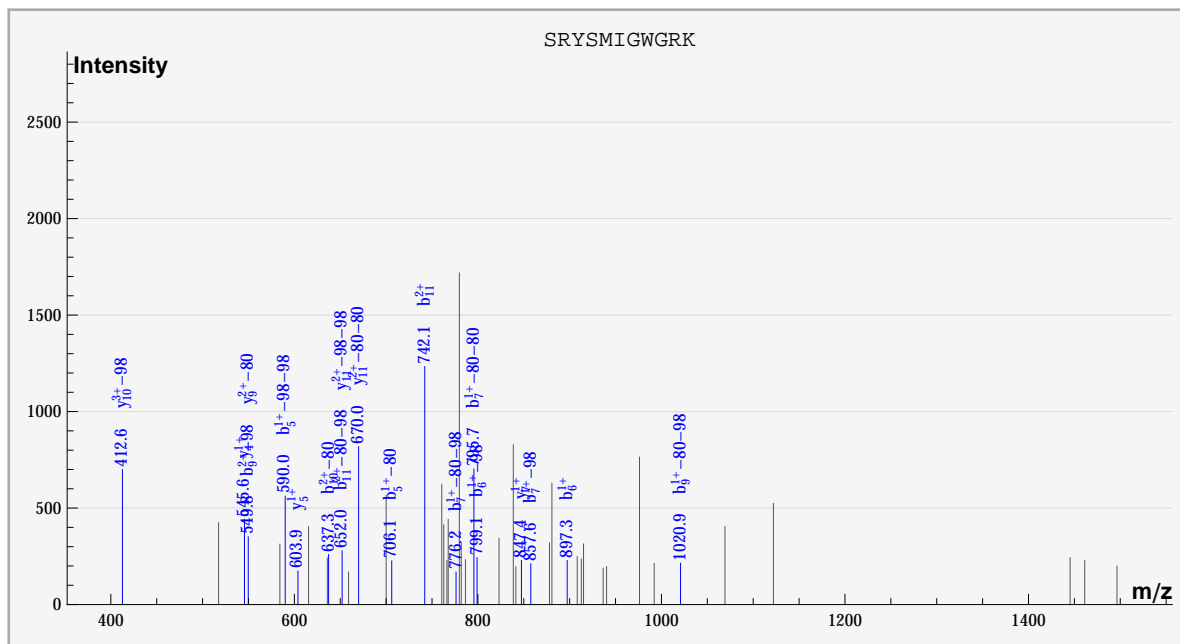

|   | #  | b | b* | #  | y | y* | P | P* |
|---|----|---|----|----|---|----|---|----|
| S | 1  |   |    |    |   |    |   | ✓  |
| R | 2  |   |    | 10 |   | ✓  |   |    |
| Y | 3  |   |    | 9  |   | ✓  |   |    |
| S | 4  |   |    | 8  |   |    |   |    |
| M | 5  |   | ✓  | 7  |   | ✓  |   |    |
| I | 6  | ✓ | ✓  | 6  |   |    |   |    |
| G | 7  |   | ✓  | 5  |   | ✓  |   |    |
| W | 8  |   |    | 4  |   | ✓  |   |    |
| G | 9  |   | ✓  | 3  |   |    |   |    |
| R | 10 |   | ✓  | 2  |   |    |   |    |
| K | 11 | ✓ | ✓  | 1  |   |    |   |    |

SRYSMIGWGRK

dbValid true KLMDIGLITREK PHOS(1) 2. 750. -1.10107 5.10259 100. ? 3468.  
 S\_Acido\_new%gi|68567659|gb|AAy80588.1| KLMDIGLITREK%:::::PHOS::::%sample\_0%compd\_1831

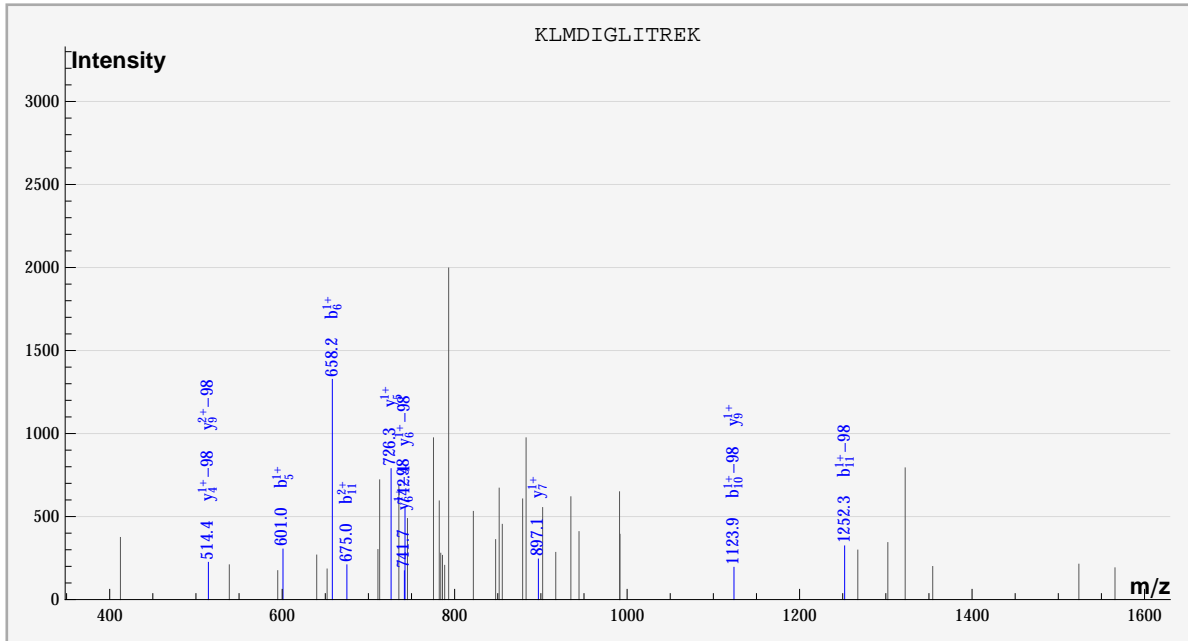

|   | #  | b | b* | #  | y | y* | P | P* |
|---|----|---|----|----|---|----|---|----|
| K | 1  |   |    |    |   |    |   |    |
| L | 2  |   |    | 11 |   |    |   |    |
| M | 3  |   |    | 10 |   |    |   |    |
| D | 4  |   |    | 9  | ✓ | ✓  |   |    |
| I | 5  | ✓ |    | 8  |   |    |   |    |
| G | 6  | ✓ |    | 7  | ✓ |    |   |    |
| L | 7  |   |    | 6  |   | ✓  |   |    |
| I | 8  |   |    | 5  | ✓ |    |   |    |
| T | 9  |   |    | 4  |   | ✓  |   |    |
| R | 10 |   | ✓  | 3  |   |    |   |    |
| E | 11 | ✓ | ✓  | 2  |   |    |   |    |
| K | 12 |   |    | 1  |   |    |   |    |

K L M D I G L I T R E K

dbValid true DYQLQGIYNLK PHOS(2) 2. 751. -0.667248 5.11316 100. ? 3144.  
 S\_Acido\_new%gi|68568544|gb|AA81473.1| DYQLQGIYNLK%::PHOS:::PHOS:::sample\_0%compd\_1643

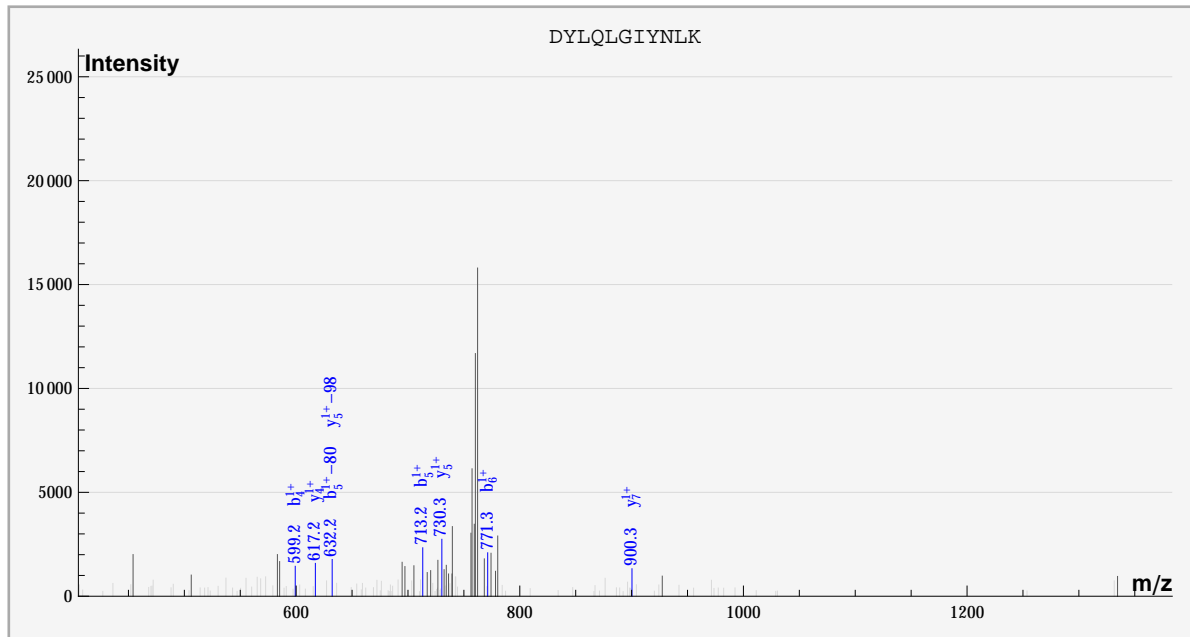

|   | #  | b | b* | #  | y | y* | P | P* |
|---|----|---|----|----|---|----|---|----|
| D | 1  |   |    |    |   |    |   |    |
| Y | 2  |   |    | 10 |   |    |   |    |
| L | 3  |   |    | 9  |   |    |   |    |
| Q | 4  | ✓ |    | 8  |   |    |   |    |
| L | 5  | ✓ | ✓  | 7  | ✓ |    |   |    |
| G | 6  | ✓ |    | 6  |   |    |   |    |
| I | 7  |   |    | 5  | ✓ | ✓  |   |    |
| Y | 8  |   |    | 4  | ✓ |    |   |    |
| N | 9  |   |    | 3  |   |    |   |    |
| L | 10 |   |    | 2  |   |    |   |    |
| K | 11 |   |    | 1  |   |    |   |    |

D Y L Q L G I Y N L K

dbValid true KSTGIVVSWDKK PHOS(2) 2. 753. 1.35147 5.09885 100. ? 2652.  
 S\_Acido\_new%gi|68568101|gb|AAY81030.1| KSTGIVVSWDKK%::PHOS:PHOS:::sample\_0%compd\_1161

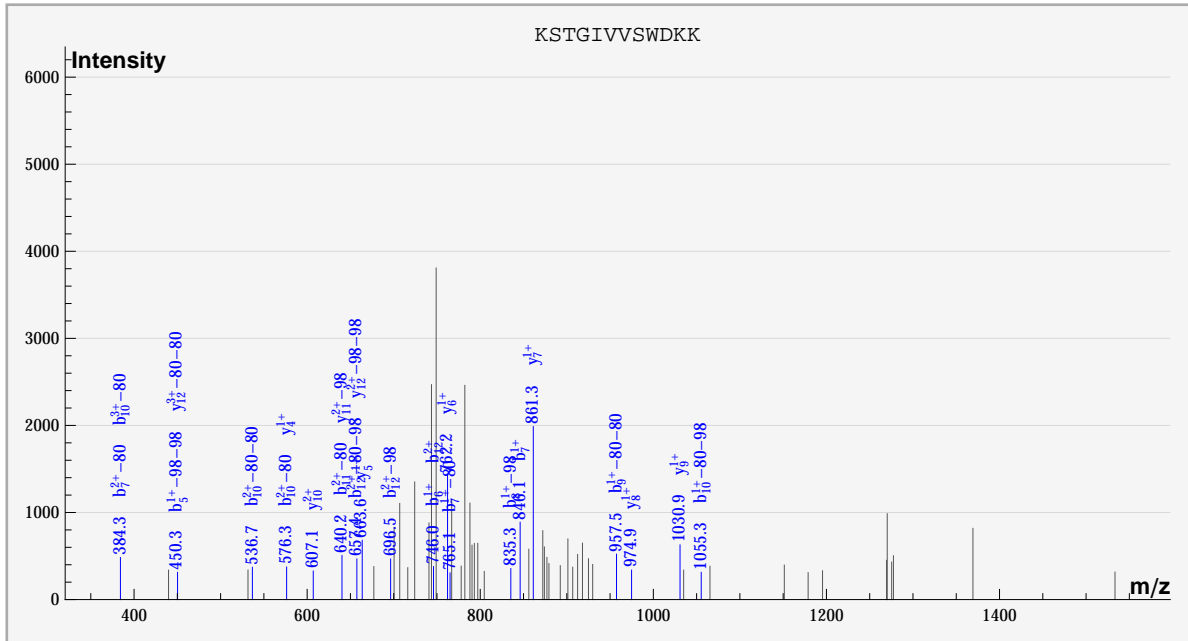

|   | #  | b | b* | #  | y | y* | P | P* |
|---|----|---|----|----|---|----|---|----|
| K | 1  |   |    |    |   |    |   | ✓  |
| S | 2  |   |    | 11 |   | ✓  |   |    |
| T | 3  |   |    | 10 | ✓ |    |   |    |
| G | 4  |   |    | 9  | ✓ |    |   |    |
| I | 5  |   | ✓  | 8  | ✓ |    |   |    |
| V | 6  | ✓ |    | 7  | ✓ |    |   |    |
| V | 7  | ✓ | ✓  | 6  | ✓ |    |   |    |
| S | 8  |   | ✓  | 5  | ✓ |    |   |    |
| W | 9  |   | ✓  | 4  | ✓ |    |   |    |
| D | 10 |   | ✓  | 3  |   |    |   |    |
| K | 11 |   | ✓  | 2  |   |    |   |    |
| K | 12 | ✓ | ✓  | 1  |   |    |   |    |

[ K ] [ S ] [ T ] [ G ] [ I ] [ V ] [ V ] [ S ] [ W ] [ D ] [ K ] [ K ]

dbValid true YNVDYEFYFTK PHOS(2) 2. 753. -1.73018 5.13516 100. ? 3018.  
 S\_Acido\_new%gi|68567767|gb|AA80696.1| YNVDYEFYFTK%:PHOS:::PHOS::%sample\_0%compd\_1461

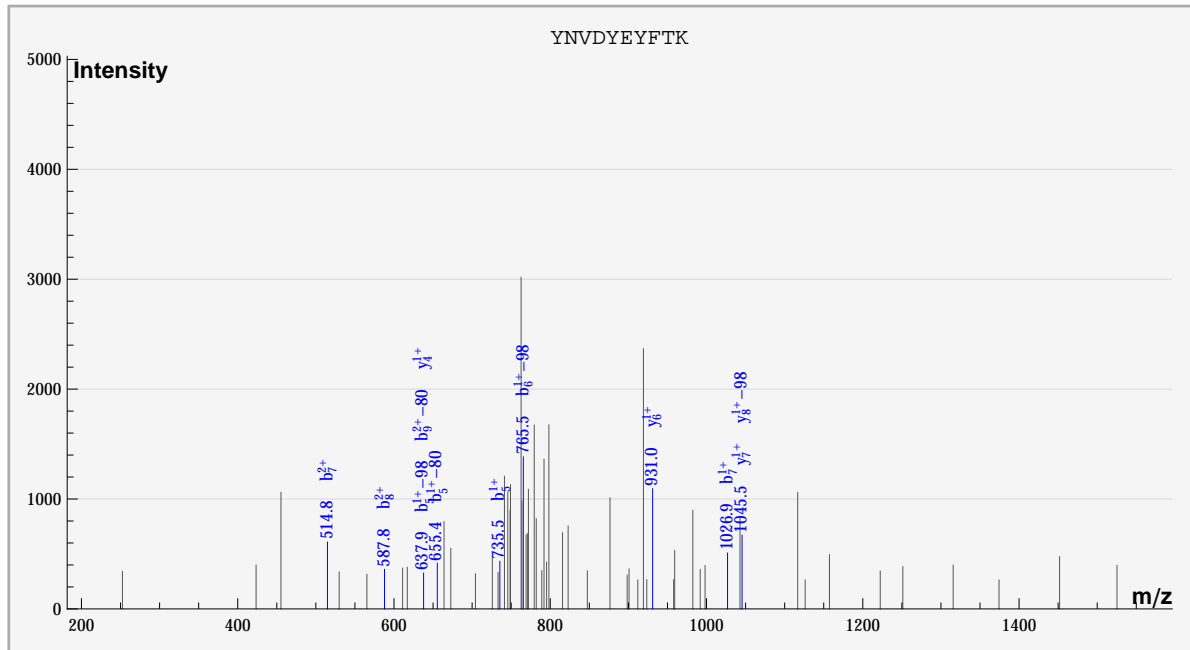

|   | #  | b | b* | # | y | y* | P | P* |
|---|----|---|----|---|---|----|---|----|
| Y | 1  |   |    |   |   |    |   |    |
| N | 2  |   |    | 9 |   |    |   |    |
| V | 3  |   |    | 8 |   | ✓  |   |    |
| D | 4  |   |    | 7 |   | ✓  |   |    |
| Y | 5  | ✓ | ✓  | 6 |   | ✓  |   |    |
| E | 6  |   | ✓  | 5 |   |    |   |    |
| Y | 7  | ✓ |    | 4 |   | ✓  |   |    |
| F | 8  | ✓ |    | 3 |   |    |   |    |
| T | 9  |   | ✓  | 2 |   |    |   |    |
| K | 10 |   |    | 1 |   |    |   |    |

Y N V D Y E Y F T K

dbValid true ISLINI PHOS(1) 1. 754. -1.60465 6.0654 100. ? 2952.  
 S\_Acido\_new%gi|68568430|gb|AAY81359.1| ISLINI%::PHOS::::%sample\_0%compd\_1480

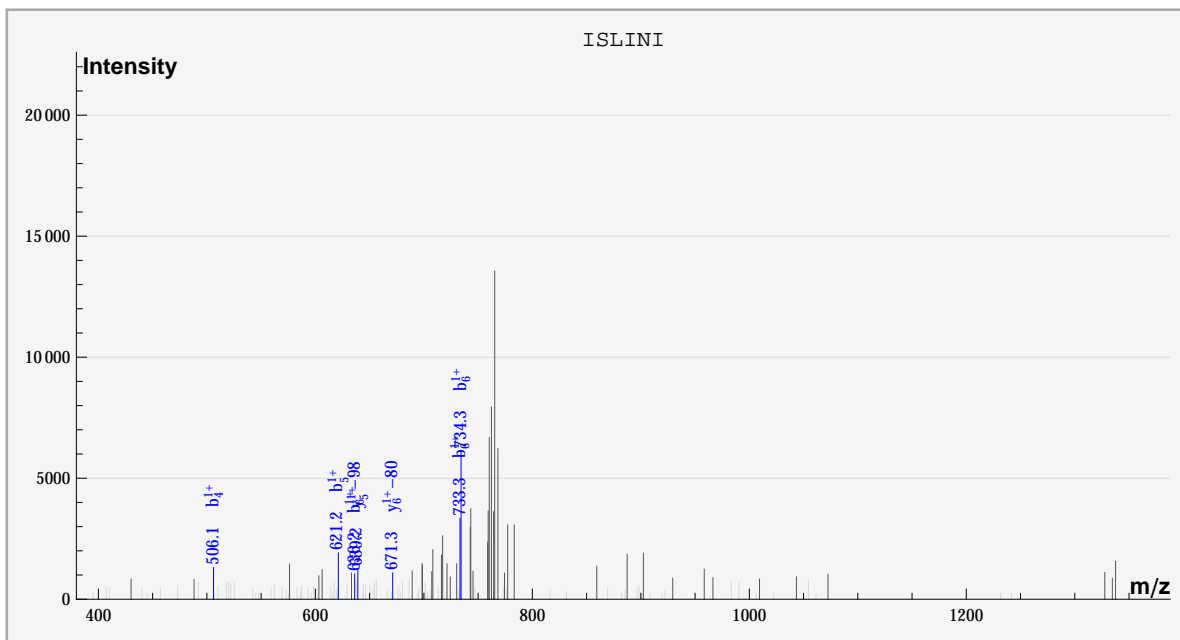

|   | # | b | b* | # | y | y* | P | P* |
|---|---|---|----|---|---|----|---|----|
| I | 1 |   |    |   |   |    |   | ✓  |
| S | 2 |   |    | 5 | ✓ |    |   |    |
| L | 3 |   |    | 4 |   |    |   |    |
| I | 4 | ✓ |    | 3 |   |    |   |    |
| N | 5 | ✓ |    | 2 |   |    |   |    |
| I | 6 | ✓ | ✓  | 1 |   |    |   |    |

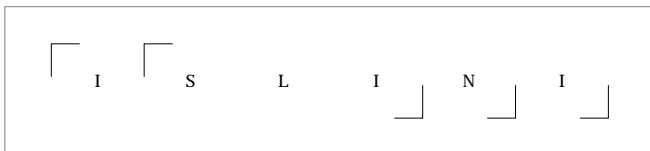

dbValid true NLSLAR PHOS(1) 1. 755. -1.63455 5.35691 100. ? 2526.  
 S\_Acido\_new%gi|68566812|gb|AAY79741.1| NLSLAR%:::PHOS:::%sample\_0%compd\_1114

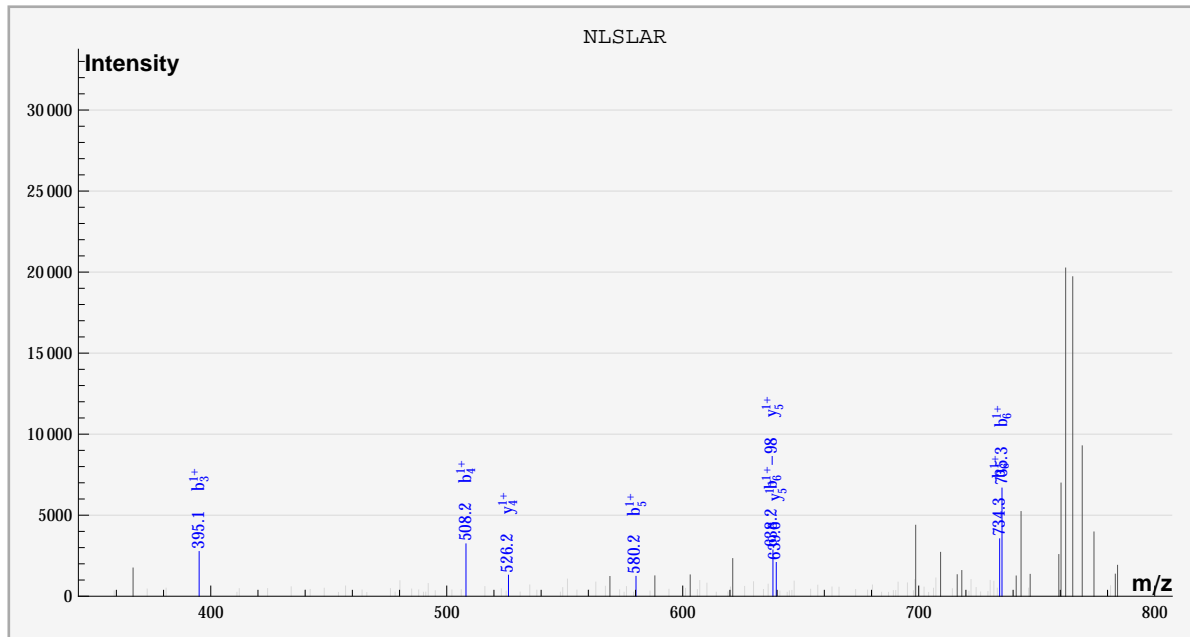

|   | # | b | b* | # | y | y* | P | P* |
|---|---|---|----|---|---|----|---|----|
| N | 1 |   |    |   |   |    |   |    |
| L | 2 |   |    | 5 | ✓ |    |   |    |
| S | 3 | ✓ |    | 4 | ✓ |    |   |    |
| L | 4 | ✓ |    | 3 |   |    |   |    |
| A | 5 | ✓ |    | 2 |   |    |   |    |
| R | 6 | ✓ | ✓  | 1 |   |    |   |    |

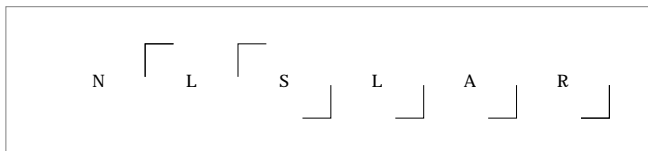



dbValid true FYVITISTSR PHOS(4) 2. 755. -1.24043 5.08474 100. ? 2718.  
 S\_Acido\_new%gi|68566711|gb|AA79640.1| FYVITISTSR::PHOS::PHOS::PHOS:PHOS::%sample\_0%compd\_1277

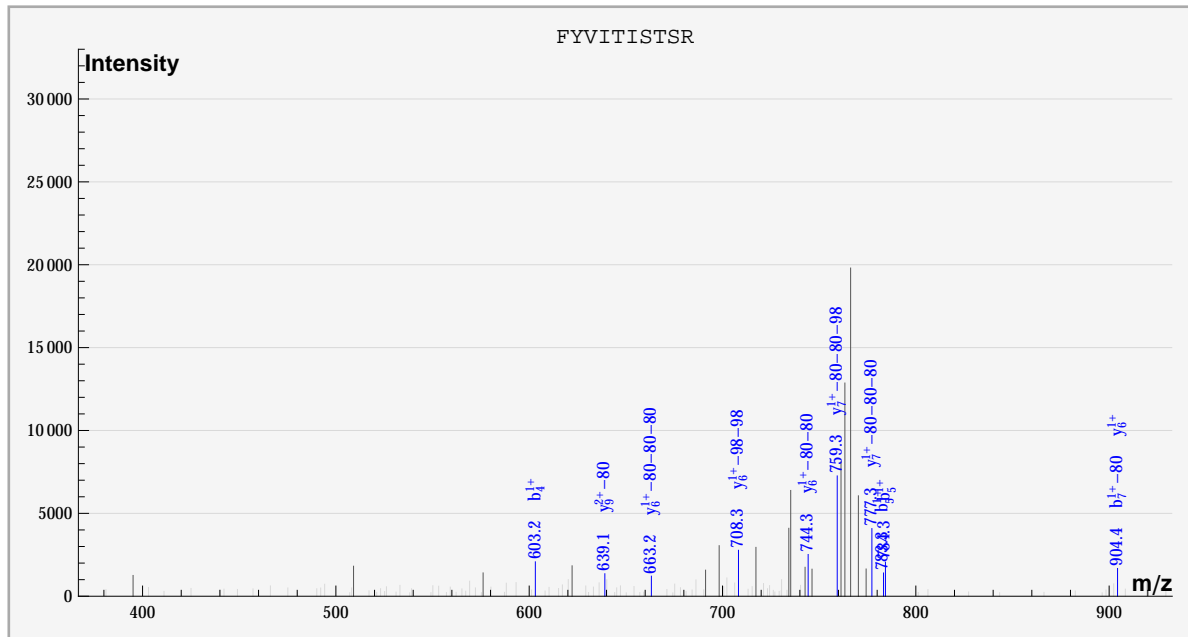

|   | #  | b | b* | # | y | y* | P | P* |
|---|----|---|----|---|---|----|---|----|
| F | 1  |   |    |   |   |    |   |    |
| Y | 2  |   |    | 9 |   | ✓  |   |    |
| V | 3  |   |    | 8 |   |    |   |    |
| I | 4  | ✓ |    | 7 |   | ✓  |   |    |
| T | 5  | ✓ |    | 6 | ✓ | ✓  |   |    |
| I | 6  |   |    | 5 |   |    |   |    |
| S | 7  |   | ✓  | 4 |   |    |   |    |
| T | 8  |   |    | 3 |   |    |   |    |
| S | 9  |   |    | 2 |   |    |   |    |
| R | 10 |   |    | 1 |   |    |   |    |

F Y V I T I S T S R

dbValid true FTTAYISQKSK PHOS(3) 2. 756. 1.29243 5.15648 100. ? 1668.

S\_Acido\_new%gi|68566747|gb|AA79676.1| FTTAYISQKSK%::PHOS:PHOS:::PHOS::%sample\_0%cmpd\_373

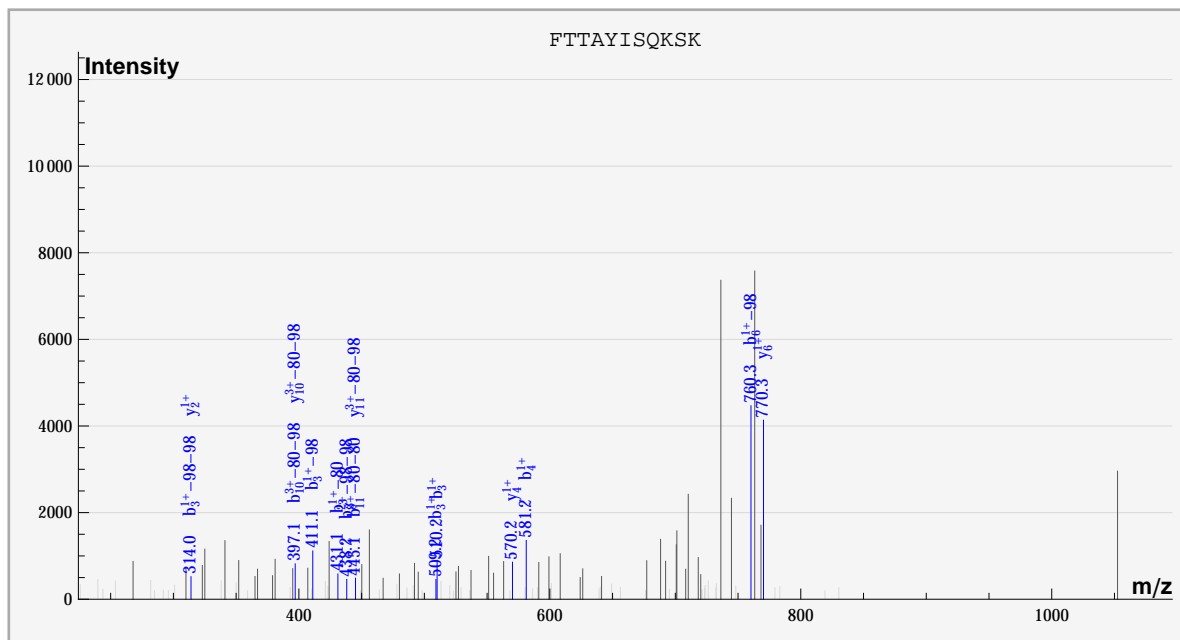

|   | #  | b | b* | #  | y | y* | P | P* |
|---|----|---|----|----|---|----|---|----|
| F | 1  |   |    |    |   |    |   | ✓  |
| T | 2  |   |    | 10 |   | ✓  |   |    |
| T | 3  | ✓ | ✓  | 9  |   |    |   |    |
| A | 4  | ✓ |    | 8  |   |    |   |    |
| Y | 5  |   |    | 7  |   |    |   |    |
| I | 6  |   | ✓  | 6  | ✓ |    |   |    |
| S | 7  |   |    | 5  |   |    |   |    |
| Q | 8  |   | ✓  | 4  | ✓ |    |   |    |
| K | 9  |   |    | 3  |   |    |   |    |
| S | 10 |   | ✓  | 2  | ✓ |    |   |    |
| K | 11 |   | ✓  | 1  |   |    |   |    |

FTTAYISQKSK

dbValid true EYYGAVSGVSR PHOS(4) 2. 756. -1.7792 5.1146 100. ? 2400.  
 S\_Acido\_new%gi|68568028|gb|AA80957.1| EYYGAVSGVSR::PHOS:PHOS::PHOS::PHOS::%sample\_0%cmpd\_1000

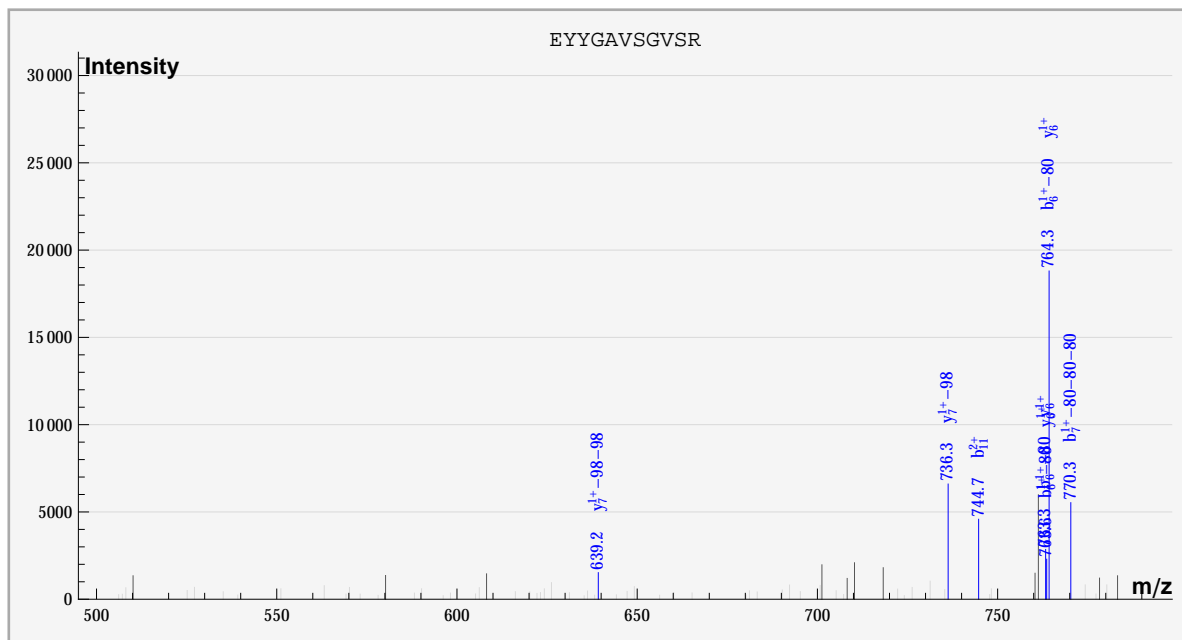

|   | #  | b | b* | #  | y | y* | P | P* |
|---|----|---|----|----|---|----|---|----|
| E | 1  |   |    |    |   |    |   |    |
| Y | 2  |   |    | 10 |   |    |   |    |
| Y | 3  |   |    | 9  |   |    |   |    |
| G | 4  |   |    | 8  |   |    |   |    |
| A | 5  |   |    | 7  |   | ✓  |   |    |
| V | 6  | ✓ |    | 6  | ✓ |    |   |    |
| S | 7  | ✓ |    | 5  |   |    |   |    |
| G | 8  |   |    | 4  |   |    |   |    |
| V | 9  |   |    | 3  |   |    |   |    |
| S | 10 |   |    | 2  |   |    |   |    |
| R | 11 | ✓ |    | 1  |   |    |   |    |

E Y Y G [ A [ V ] S ] G V S R ]

dbValid true DGKTVR PHOS(1) 1. 756. -0.655285 5.20779 100. ? 2886.  
 S\_Acido\_new%gi|68568162|gb|AAY81091.1| DGKTVR%:::PHOS:::sample\_0%compd\_1354

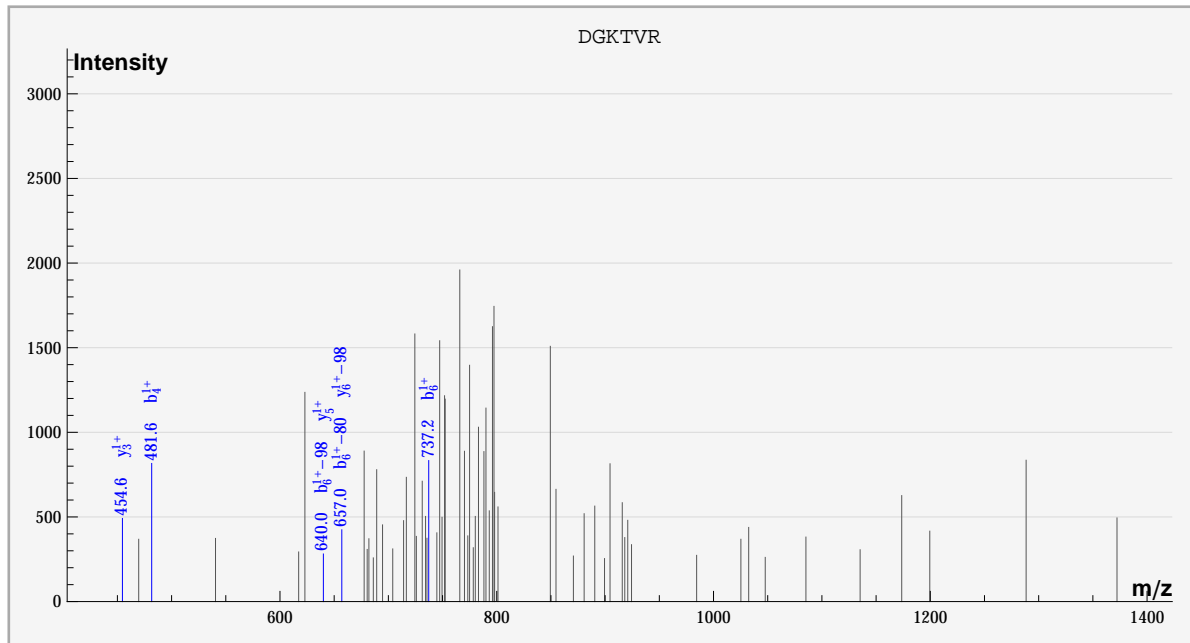

|   | # | b | b* | # | y | y* | P | P* |
|---|---|---|----|---|---|----|---|----|
| D | 1 |   |    |   |   |    |   | ✓  |
| G | 2 |   |    | 5 | ✓ |    |   |    |
| K | 3 |   |    | 4 |   |    |   |    |
| T | 4 | ✓ |    | 3 | ✓ |    |   |    |
| V | 5 |   |    | 2 |   |    |   |    |
| R | 6 | ✓ | ✓  | 1 |   |    |   |    |

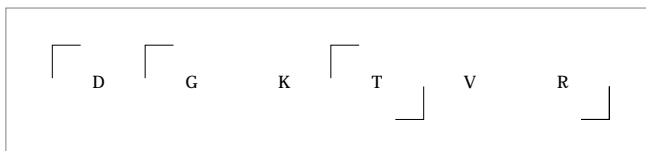

dbValid true EYIFYDSKYK PHOS(2) 2. 757.59 0.705837 5.09551 100. ? 2238.  
 S\_Acido\_new%gi|68567051|gb|AA79980.1| EYIFYDSKYK%::PHOS:::PHOS::%sample\_1%cmpd\_894

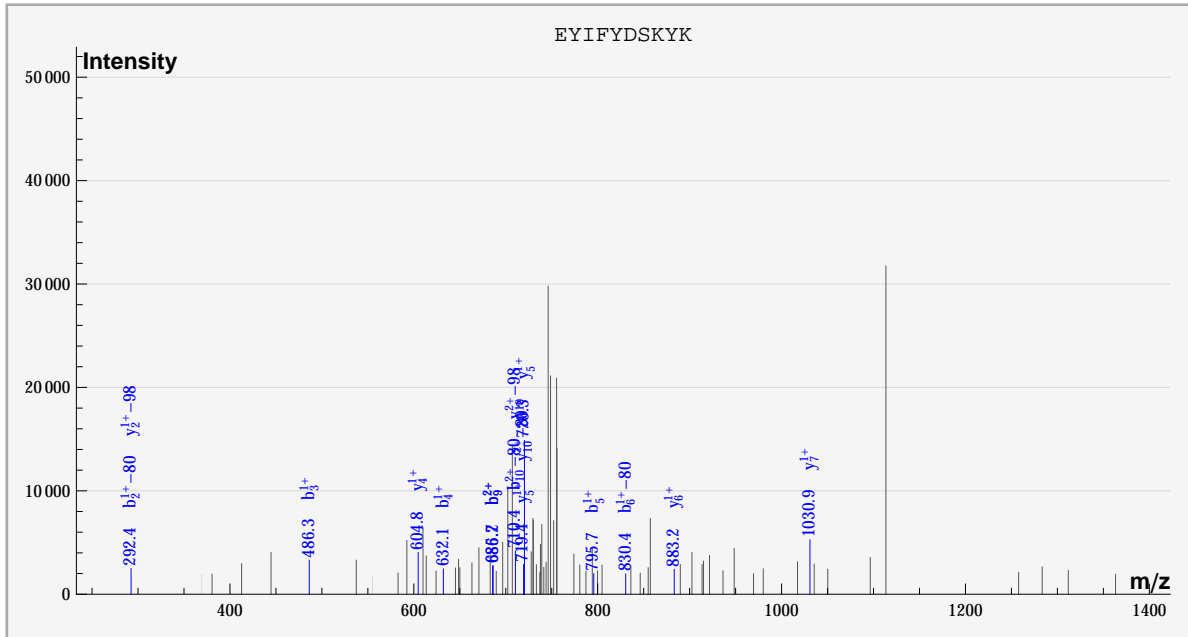

|   | #  | b | b* | # | y | y* | P | P* |
|---|----|---|----|---|---|----|---|----|
| E | 1  |   |    |   |   |    |   | ✓  |
| Y | 2  |   | ✓  | 9 |   |    |   |    |
| I | 3  | ✓ |    | 8 |   |    |   |    |
| F | 4  | ✓ |    | 7 | ✓ |    |   |    |
| Y | 5  | ✓ |    | 6 | ✓ |    |   |    |
| D | 6  |   | ✓  | 5 | ✓ |    |   |    |
| S | 7  |   |    | 4 | ✓ |    |   |    |
| K | 8  |   |    | 3 |   |    |   |    |
| Y | 9  | ✓ |    | 2 |   | ✓  |   |    |
| K | 10 |   | ✓  | 1 |   |    |   |    |

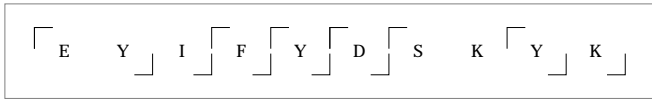

dbValid true VESLDN PHOS(1) 1. 758. -1.71889 5.42105 100. ? 3216.  
 S\_Acido\_new%gi|68568023|gb|AAY80952.1| VESLDN%:::PHOS:::%sample\_0%compd\_1711

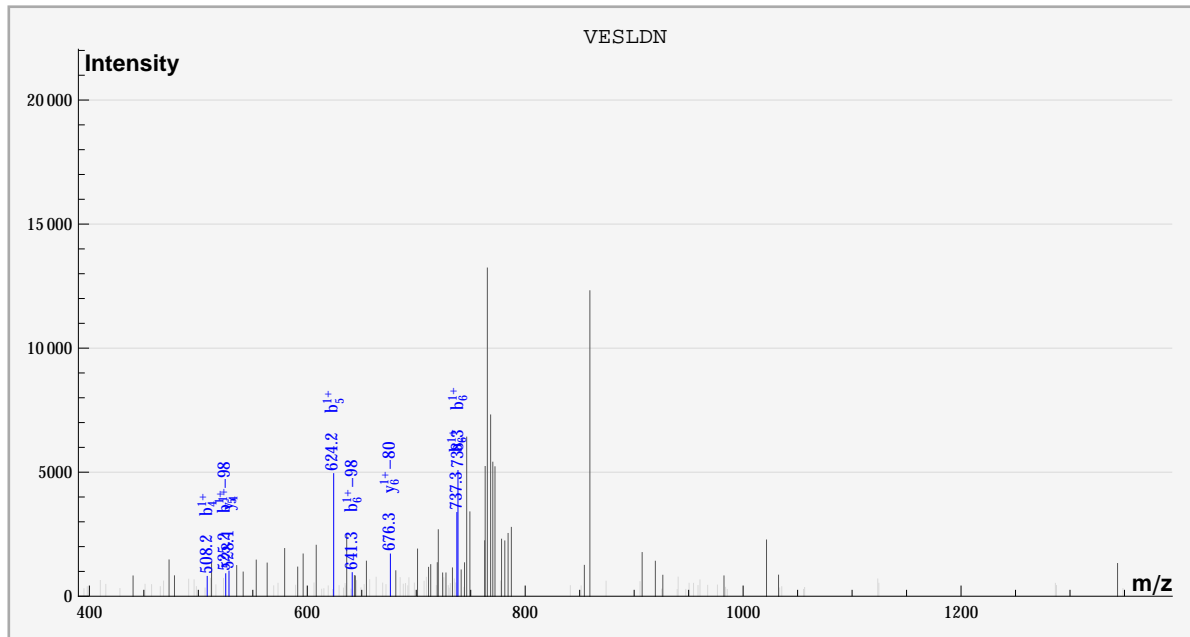

|   | # | b | b* | # | y | y* | P | P* |
|---|---|---|----|---|---|----|---|----|
| V | 1 |   |    |   |   |    |   | ✓  |
| E | 2 |   |    | 5 |   |    |   |    |
| S | 3 |   |    | 4 | ✓ |    |   |    |
| L | 4 | ✓ |    | 3 |   |    |   |    |
| D | 5 | ✓ | ✓  | 2 |   |    |   |    |
| N | 6 | ✓ | ✓  | 1 |   |    |   |    |

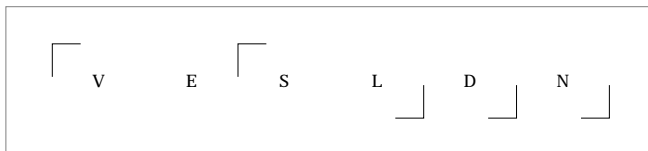

dbValid true TLSSNKELTAK PHOS(4) 2. 758. -1.73479 5.0777 100. ? 3738.

S\_Acido\_new%gi|68566640|gb|AAY79569.1| TLSSNKELTAK%:PHOS::PHOS:PHOS::::PHOS:::sample\_0%compd\_2157

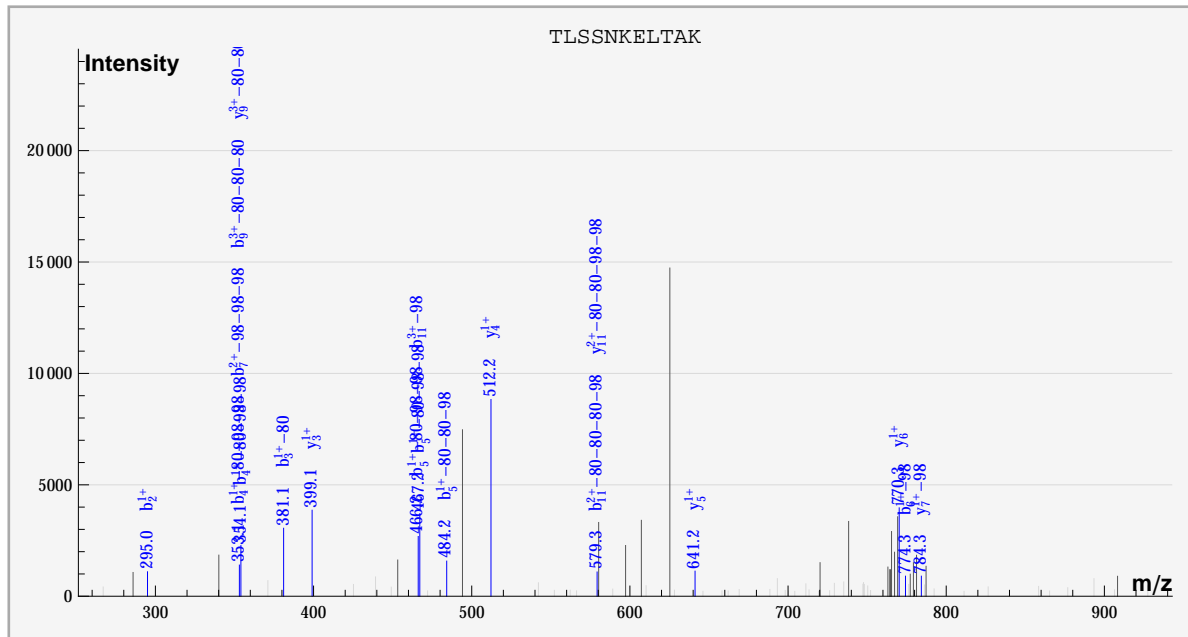

|   | #  | b | b* | #  | y | y* | P | P* |
|---|----|---|----|----|---|----|---|----|
| T | 1  |   |    |    |   |    |   | ✓  |
| L | 2  | ✓ |    | 10 |   | ✓  |   |    |
| S | 3  |   | ✓  | 9  |   | ✓  |   |    |
| S | 4  |   | ✓  | 8  |   |    |   |    |
| N | 5  |   | ✓  | 7  |   | ✓  |   |    |
| K | 6  |   | ✓  | 6  | ✓ |    |   |    |
| E | 7  |   | ✓  | 5  | ✓ |    |   |    |
| L | 8  |   |    | 4  | ✓ |    |   |    |
| T | 9  |   | ✓  | 3  | ✓ |    |   |    |
| A | 10 |   |    | 2  |   |    |   |    |
| K | 11 |   | ✓  | 1  |   |    |   |    |

T L S S N K E L T A K

dbValid true IREIKHPSQSK PHOS(1) 2. 759. -0.594228 5.04102 100. ? 1812.  
 S\_Acido\_new%gi68566943|gb|AAY79872.1| IREIKHPSQSK%:::PHOS::%sample\_0%cmpd\_499

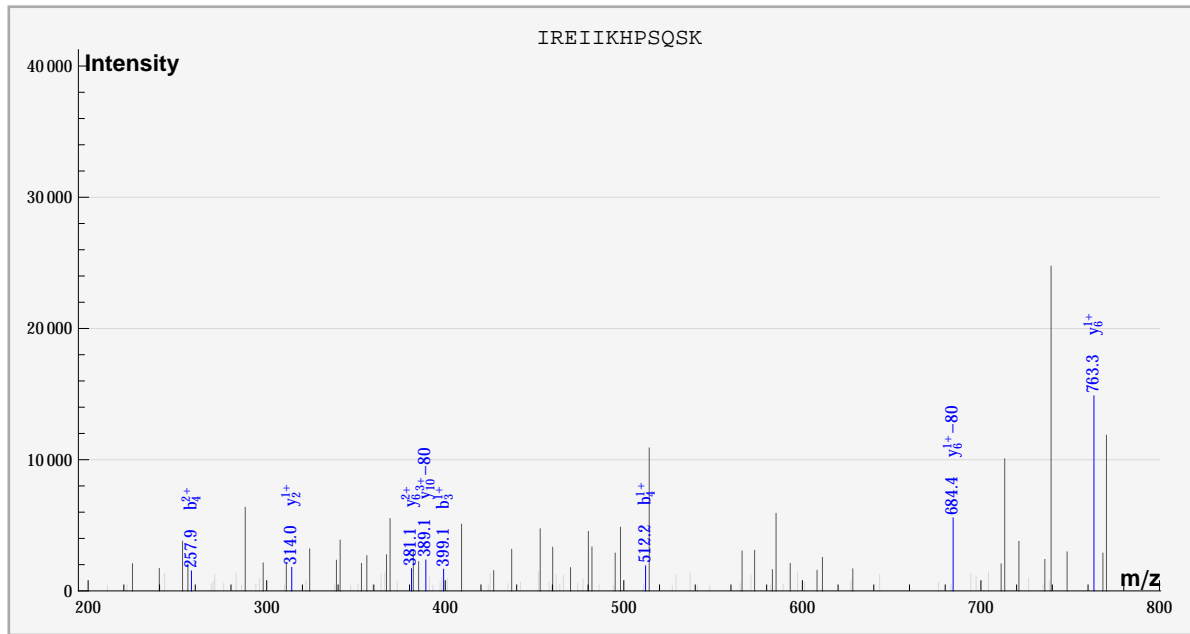

|   | #  | b | b* | #  | y | y* | P | P* |
|---|----|---|----|----|---|----|---|----|
| I | 1  |   |    |    |   |    |   |    |
| R | 2  |   |    | 11 |   |    |   |    |
| E | 3  | ✓ |    | 10 |   | ✓  |   |    |
| I | 4  | ✓ |    | 9  |   |    |   |    |
| I | 5  |   |    | 8  |   |    |   |    |
| K | 6  |   |    | 7  |   |    |   |    |
| H | 7  |   |    | 6  | ✓ | ✓  |   |    |
| P | 8  |   |    | 5  |   |    |   |    |
| S | 9  |   |    | 4  |   |    |   |    |
| Q | 10 |   |    | 3  |   |    |   |    |
| S | 11 |   |    | 2  |   | ✓  |   |    |
| K | 12 |   |    | 1  |   |    |   |    |

I R E I I K H P S Q S K



dbValid true KYSMVSTKLSYK PHOS(1) 2. 759. -1.13015 5.39729 100. ? 2892.  
 S\_Acido\_new%gi|68568081|gb|AA81010.1| KYSMVSTKLSYK%:::PHOS:::sample\_0%compd\_1435

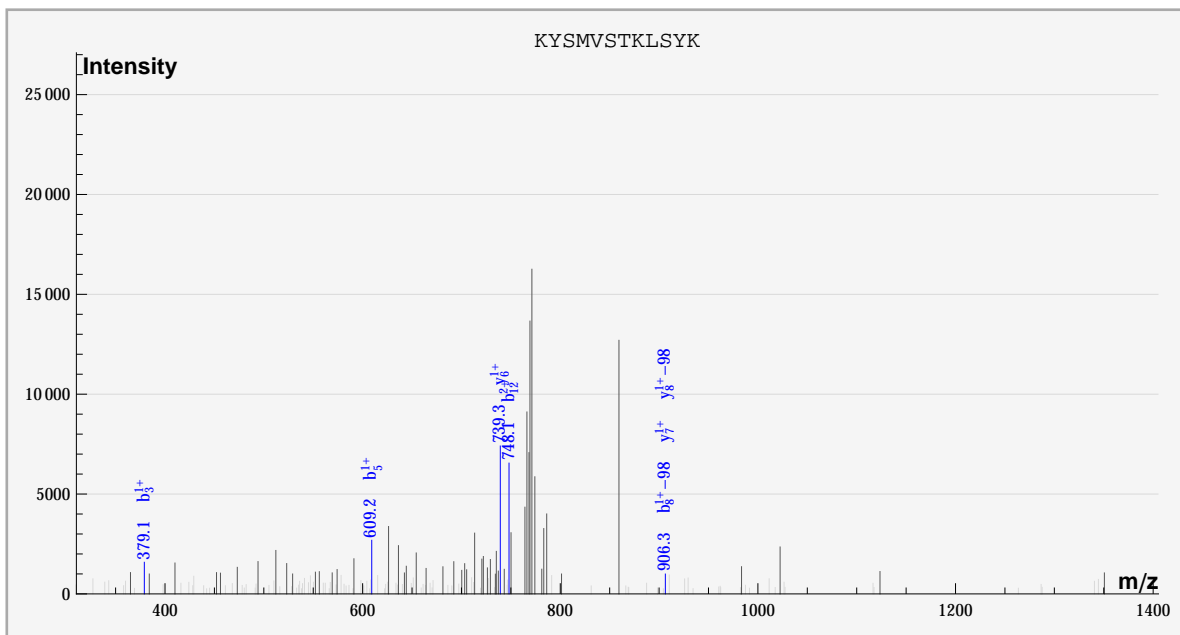

|   | #  | b | b* | #  | y | y* | P | P* |
|---|----|---|----|----|---|----|---|----|
| K | 1  |   |    |    |   |    |   |    |
| Y | 2  |   |    | 11 |   |    |   |    |
| S | 3  | ✓ |    | 10 |   |    |   |    |
| M | 4  |   |    | 9  |   |    |   |    |
| V | 5  | ✓ |    | 8  |   | ✓  |   |    |
| S | 6  |   |    | 7  | ✓ |    |   |    |
| T | 7  |   |    | 6  | ✓ |    |   |    |
| K | 8  |   | ✓  | 5  |   |    |   |    |
| L | 9  |   |    | 4  |   |    |   |    |
| S | 10 |   |    | 3  |   |    |   |    |
| Y | 11 |   |    | 2  |   |    |   |    |
| K | 12 | ✓ |    | 1  |   |    |   |    |

K Y S M V S T K L S Y K

dbValid true MINTAK PHOS(1) 1. 759. -1.66862 5.13991 100. ? 3438.

S\_Acido\_new%gi|68568720|gb|AAY81649.1| MINTAK%:::PHOS:::sample\_0%compd\_1897

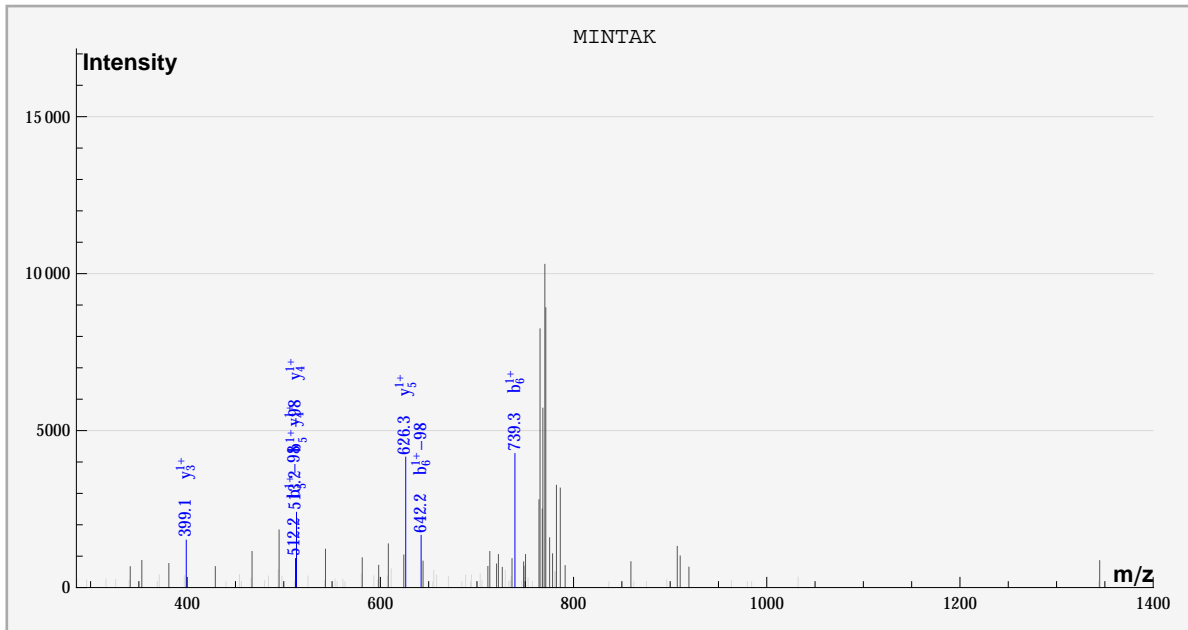

|   | # | b | b* | # | y | y* | P | P* |
|---|---|---|----|---|---|----|---|----|
| M | 1 |   |    |   |   |    |   |    |
| I | 2 |   |    | 5 | ✓ |    |   |    |
| N | 3 |   |    | 4 | ✓ |    |   |    |
| T | 4 |   |    | 3 | ✓ |    |   |    |
| A | 5 | ✓ | ✓  | 2 |   |    |   |    |
| K | 6 | ✓ | ✓  | 1 |   |    |   |    |

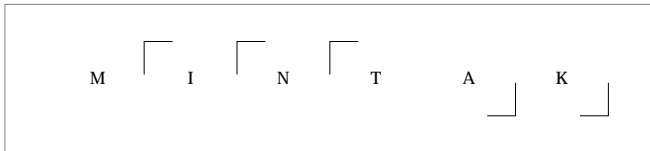

dbValid true MINTAK PHOS(1) 1. 759. -1.66862 5.11474 100. ? 3450.

S\_Acido\_new%gi|68568720|gb|AAY81649.1| MINTAK%:::PHOS:::sample\_0%compd\_1908

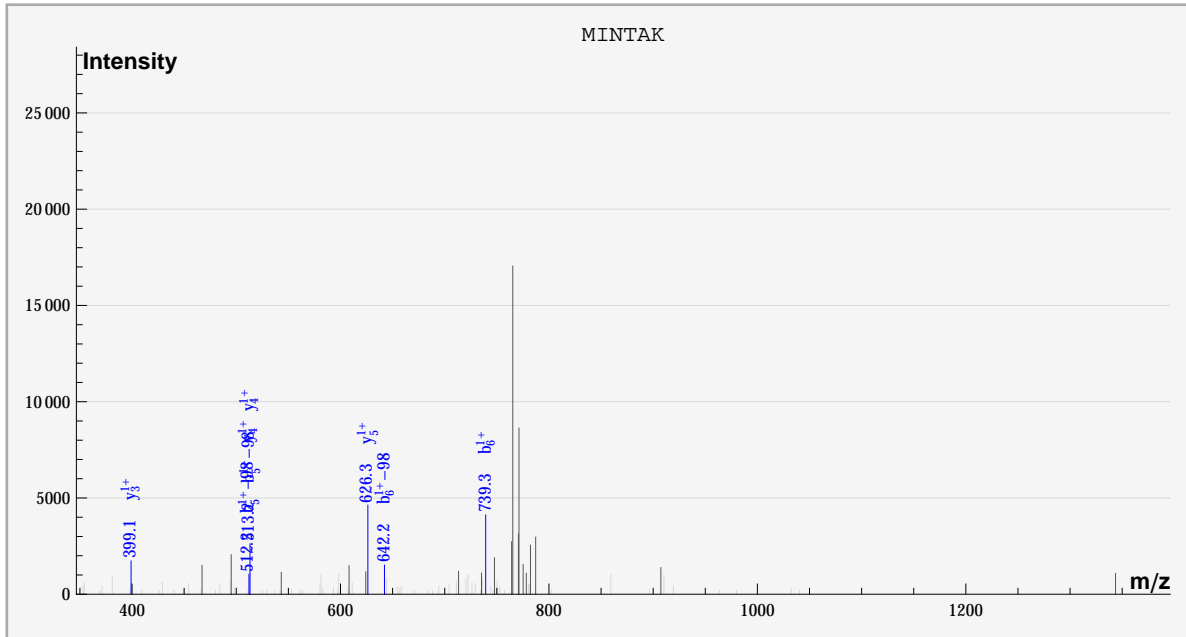

|   | # | b | b* | # | y | y* | P | P* |
|---|---|---|----|---|---|----|---|----|
| M | 1 |   |    |   |   |    |   |    |
| I | 2 |   |    | 5 | ✓ |    |   |    |
| N | 3 |   |    | 4 | ✓ |    |   |    |
| T | 4 |   |    | 3 | ✓ |    |   |    |
| A | 5 | ✓ | ✓  | 2 |   |    |   |    |
| K | 6 | ✓ | ✓  | 1 |   |    |   |    |

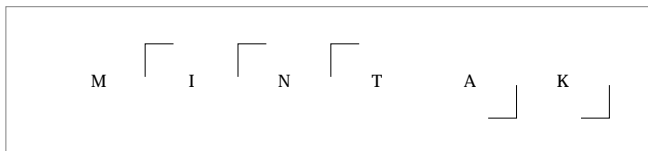

dbValid true MINTAK PHOS(1) 1. 759. -1.66862 5.53129 100. ? 3462.

S\_Acido\_new%gi|68568720|gb|AAY81649.1| MINTAK%:::PHOS:::sample\_0%compd\_1918

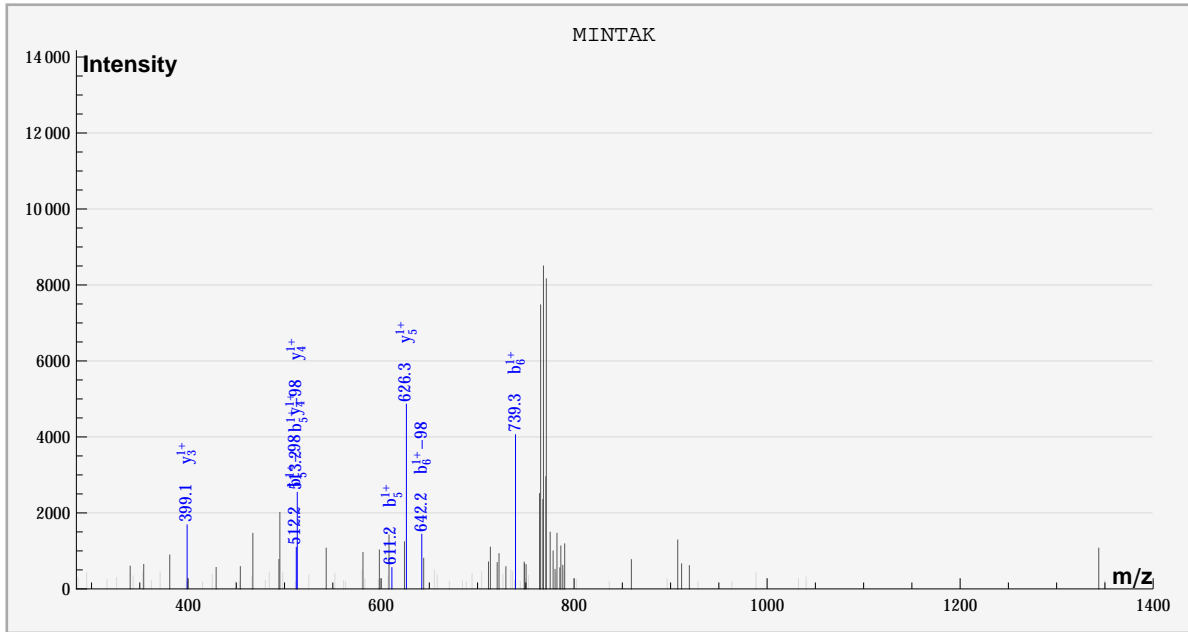

|   | # | b | b* | # | y | y* | P | P* |
|---|---|---|----|---|---|----|---|----|
| M | 1 |   |    |   |   |    |   |    |
| I | 2 |   |    | 5 | ✓ |    |   |    |
| N | 3 |   |    | 4 | ✓ |    |   |    |
| T | 4 |   |    | 3 | ✓ |    |   |    |
| A | 5 | ✓ | ✓  | 2 |   |    |   |    |
| K | 6 | ✓ | ✓  | 1 |   |    |   |    |

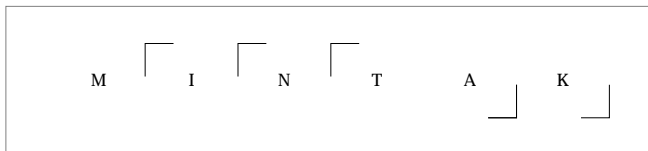

dbValid true MINTAK PHOS(1) 1. 759. -1.66862 5.89206 100. ? 3474.

S\_Acido\_new%gi|68568720|gb|AAY81649.1| MINTAK%:::PHOS:::sample\_0%compd\_1929

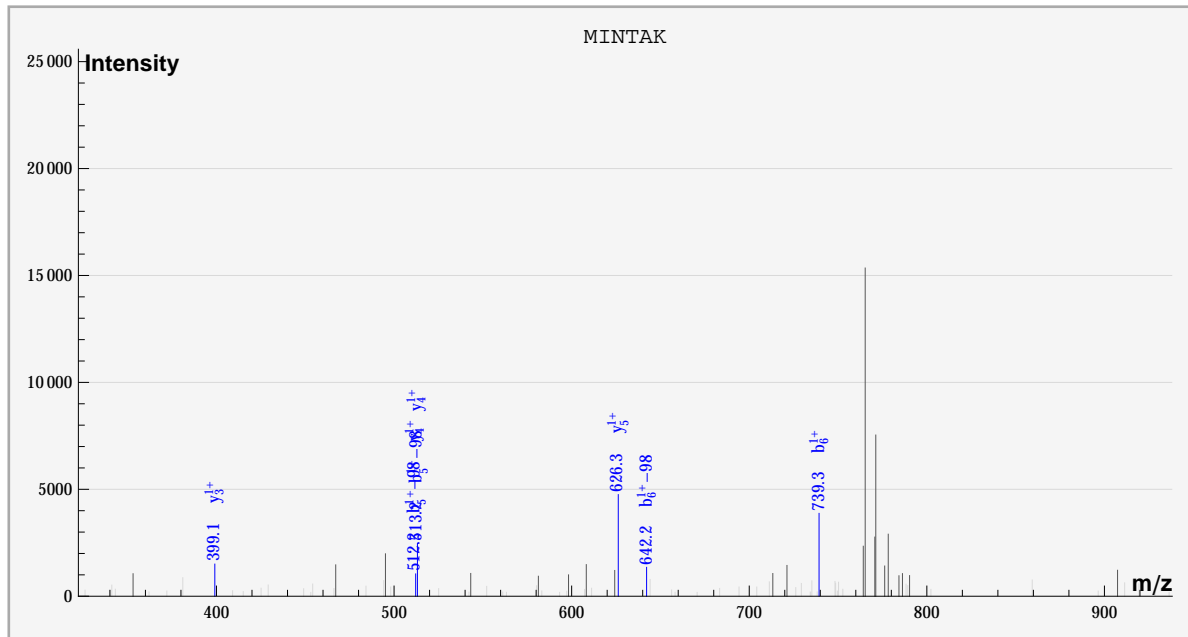

|   | # | b | b* | # | y | y* | P | P* |
|---|---|---|----|---|---|----|---|----|
| M | 1 |   |    |   |   |    |   |    |
| I | 2 |   |    | 5 | ✓ |    |   |    |
| N | 3 |   |    | 4 | ✓ |    |   |    |
| T | 4 |   |    | 3 | ✓ |    |   |    |
| A | 5 | ✓ | ✓  | 2 |   |    |   |    |
| K | 6 | ✓ | ✓  | 1 |   |    |   |    |

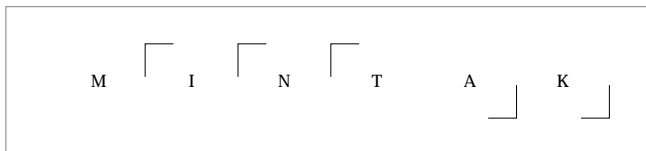

dbValid true MINTAK PHOS(1) 1. 759. -1.66862 5.49292 100. ? 3486.

S\_Acido\_new%gi|68568720|gb|AAY81649.1| MINTAK%:::PHOS:::sample\_0%compd\_1939

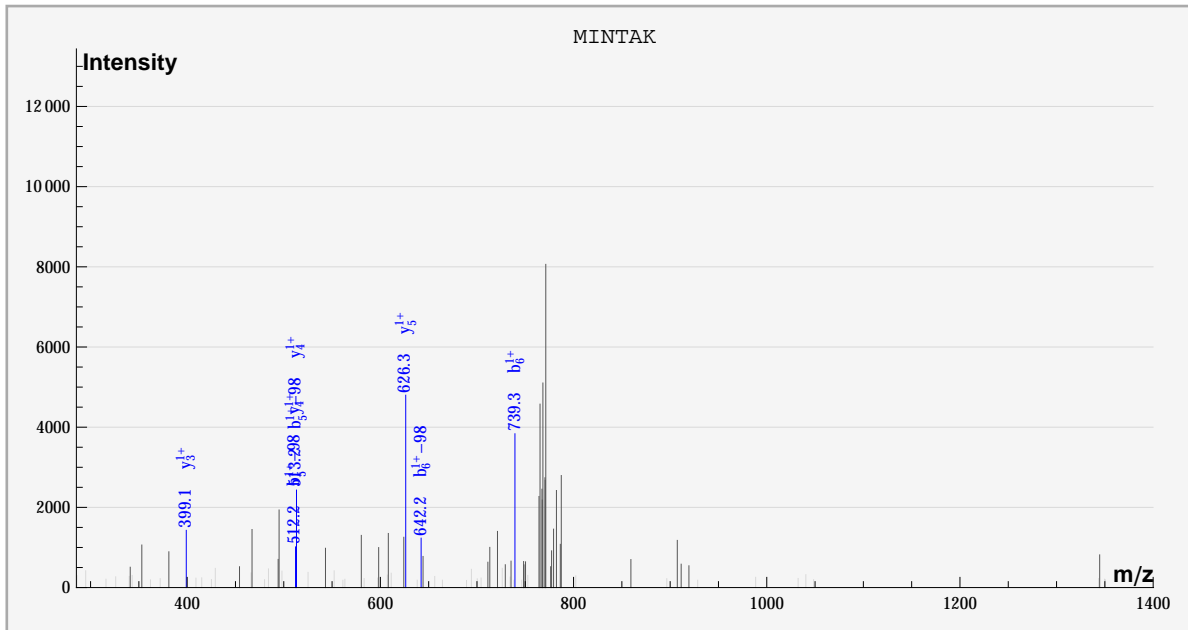

|   | # | b | b* | # | y | y* | P | P* |
|---|---|---|----|---|---|----|---|----|
| M | 1 |   |    |   |   |    |   |    |
| I | 2 |   |    | 5 | ✓ |    |   |    |
| N | 3 |   |    | 4 | ✓ |    |   |    |
| T | 4 |   |    | 3 | ✓ |    |   |    |
| A | 5 | ✓ | ✓  | 2 |   |    |   |    |
| K | 6 | ✓ | ✓  | 1 |   |    |   |    |

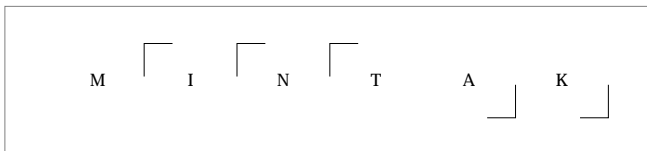

dbValid true MINTAK PHOS(1) 1. 759. -1.66862 5.7052 100. ? 3498.

S\_Acido\_new%gi|68568720|gb|AAY81649.1| MINTAK%:::PHOS:::sample\_0%compd\_1951

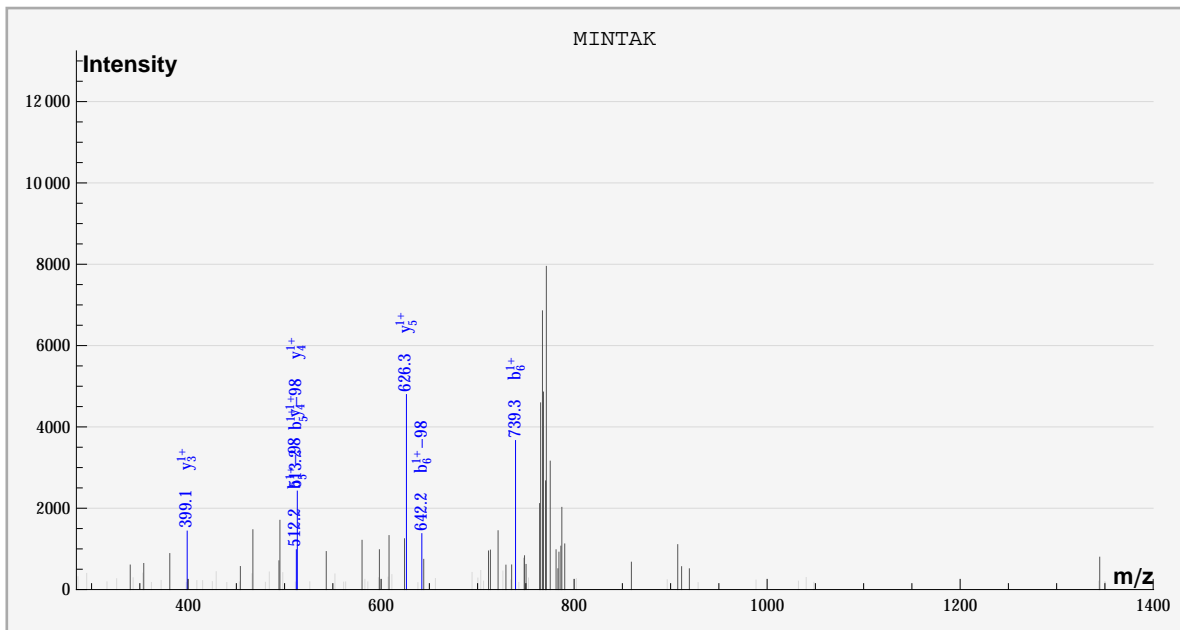

|   | # | b | b* | # | y | y* | P | P* |
|---|---|---|----|---|---|----|---|----|
| M | 1 |   |    |   |   |    |   |    |
| I | 2 |   |    | 5 | ✓ |    |   |    |
| N | 3 |   |    | 4 | ✓ |    |   |    |
| T | 4 |   |    | 3 | ✓ |    |   |    |
| A | 5 | ✓ | ✓  | 2 |   |    |   |    |
| K | 6 | ✓ | ✓  | 1 |   |    |   |    |

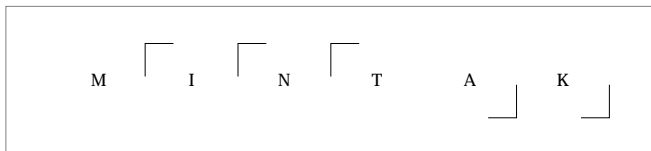

dbValid true MINTAK PHOS(1) 1. 759. -1.66862 5.43272 100. ? 3510.

S\_Acido\_new%gi|68568720|gb|AAY81649.1| MINTAK%:::PHOS:::sample\_0%compd\_1961

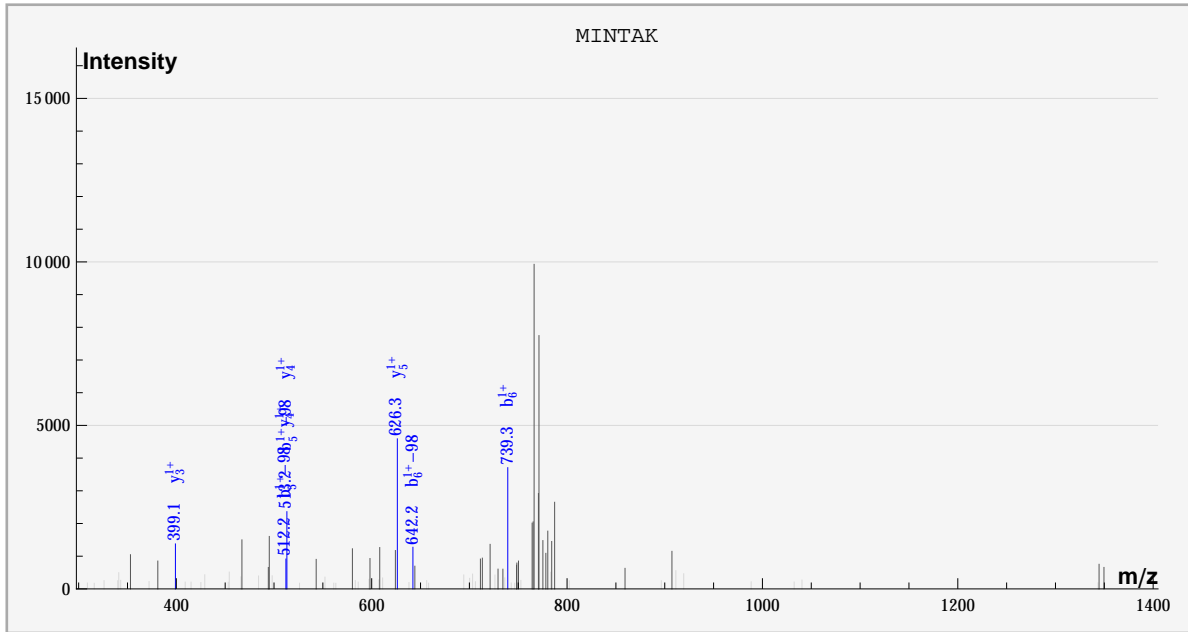

|   | # | b | b* | # | y | y* | P | P* |
|---|---|---|----|---|---|----|---|----|
| M | 1 |   |    |   |   |    |   |    |
| I | 2 |   |    | 5 | ✓ |    |   |    |
| N | 3 |   |    | 4 | ✓ |    |   |    |
| T | 4 |   |    | 3 | ✓ |    |   |    |
| A | 5 | ✓ | ✓  | 2 |   |    |   |    |
| K | 6 | ✓ | ✓  | 1 |   |    |   |    |

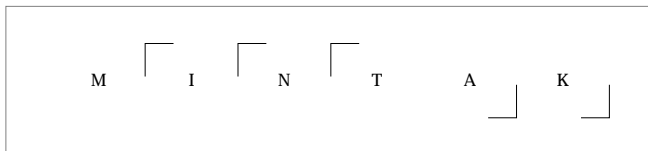



dbValid true MINTAK PHOS(1) 1. 759. -1.66862 5.92263 100. ? 3522.

S\_Acido\_new%gi|68568720|gb|AAY81649.1| MINTAK%:::PHOS:::sample\_0%compd\_1971

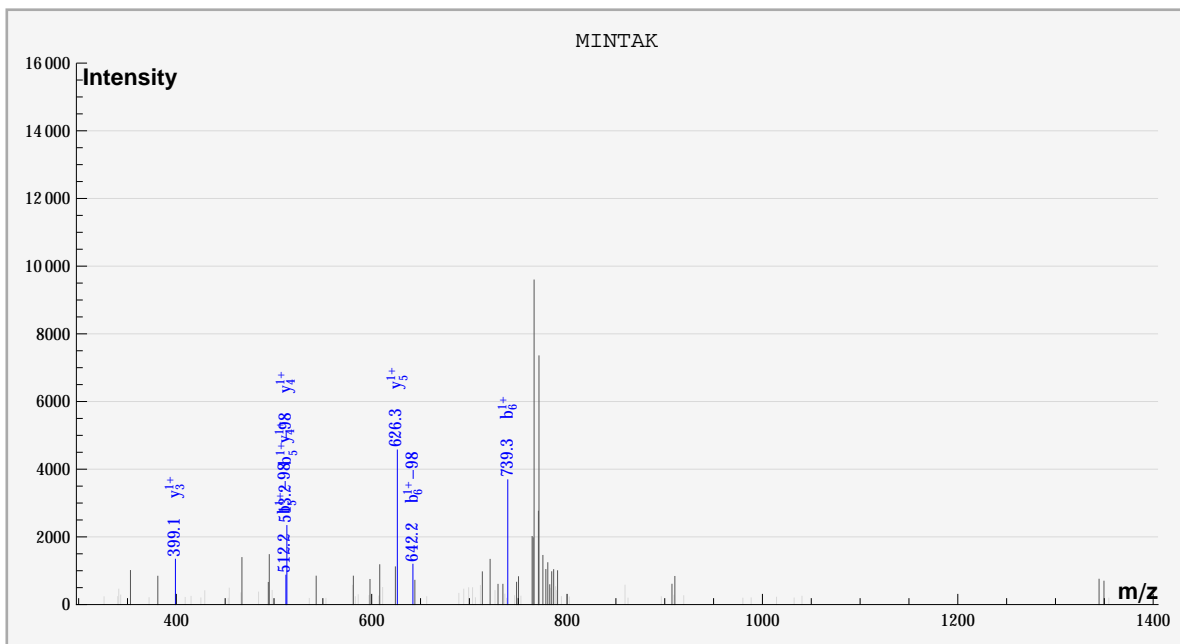

|   | # | b | b* | # | y | y* | P | P* |
|---|---|---|----|---|---|----|---|----|
| M | 1 |   |    |   |   |    |   |    |
| I | 2 |   |    | 5 | ✓ |    |   |    |
| N | 3 |   |    | 4 | ✓ |    |   |    |
| T | 4 |   |    | 3 | ✓ |    |   |    |
| A | 5 | ✓ | ✓  | 2 |   |    |   |    |
| K | 6 | ✓ | ✓  | 1 |   |    |   |    |

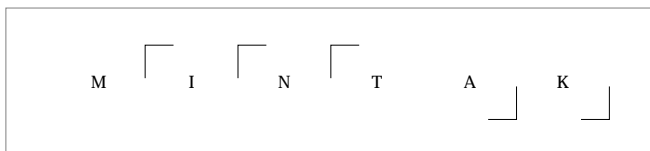

dbValid true MINTAK PHOS(1) 1. 759. -1.66862 5.50854 100. ? 3534.  
 S\_Acido\_new%gi|68568720|gb|AAY81649.1| MINTAK%:::PHOS:::sample\_0%compd\_1981

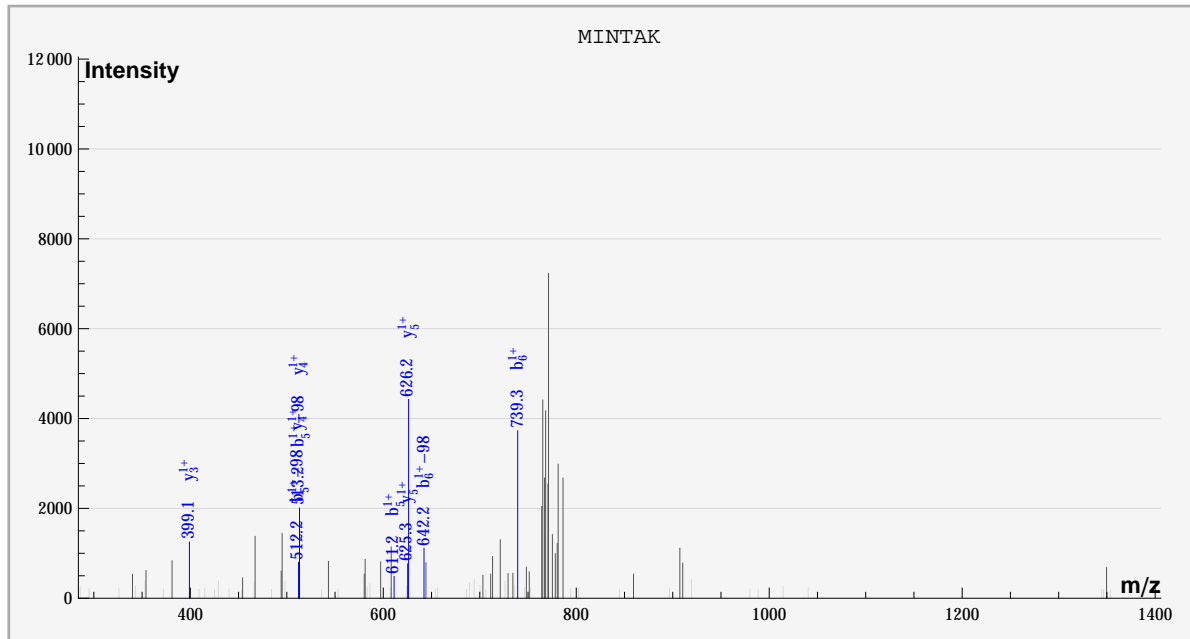

|   | # | b | b* | # | y | y* | P | P* |
|---|---|---|----|---|---|----|---|----|
| M | 1 |   |    |   |   |    |   |    |
| I | 2 |   |    | 5 | ✓ |    |   |    |
| N | 3 |   |    | 4 | ✓ |    |   |    |
| T | 4 |   |    | 3 | ✓ |    |   |    |
| A | 5 | ✓ | ✓  | 2 |   |    |   |    |
| K | 6 | ✓ | ✓  | 1 |   |    |   |    |

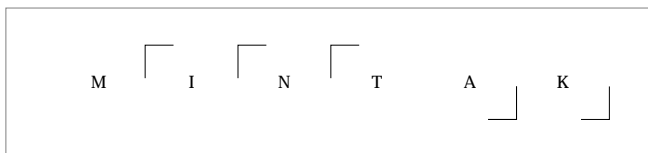

dbValid true MINTAK PHOS(1) 1. 759. -1.66862 5.31477 100. ? 3546.  
 S\_Acido\_new%gi|68568720|gb|AAY81649.1| MINTAK%:::PHOS:::sample\_0%compd\_1991

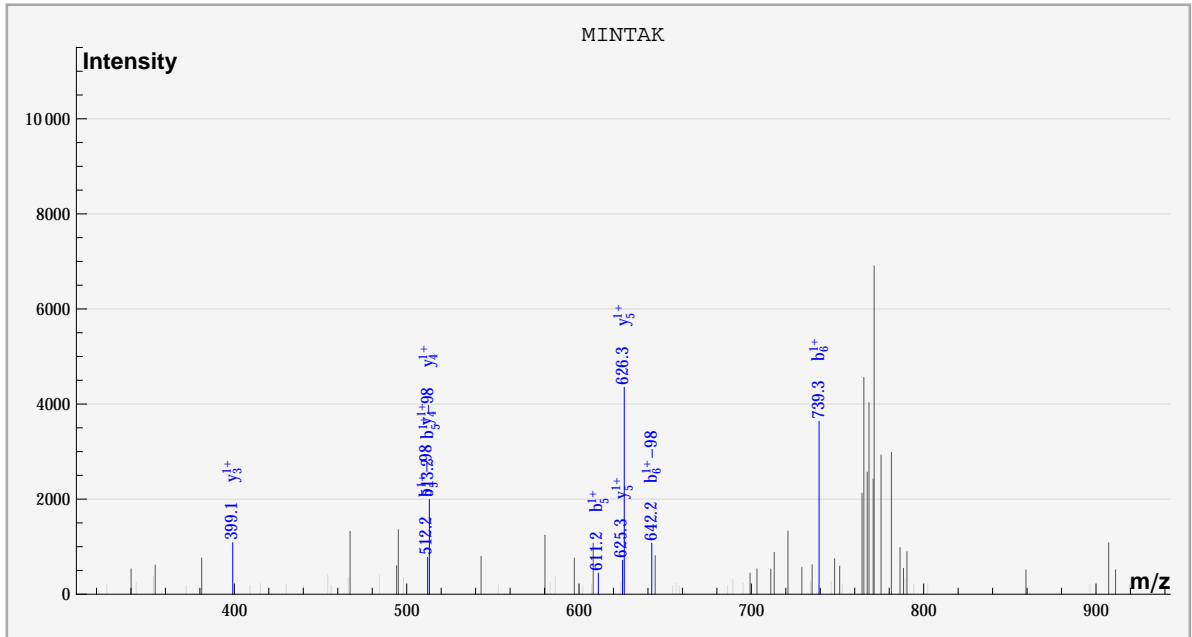

|   | # | b | b* | # | y | y* | P | P* |
|---|---|---|----|---|---|----|---|----|
| M | 1 |   |    |   |   |    |   |    |
| I | 2 |   |    | 5 | ✓ |    |   |    |
| N | 3 |   |    | 4 | ✓ |    |   |    |
| T | 4 |   |    | 3 | ✓ |    |   |    |
| A | 5 | ✓ | ✓  | 2 |   |    |   |    |
| K | 6 | ✓ | ✓  | 1 |   |    |   |    |

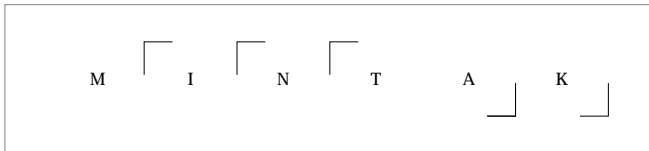

dbValid true MINTAK PHOS(1) 1. 759. -1.66862 5.4276 100. ? 3558.

S\_Acido\_new%gi|68568720|gb|AAY81649.1| MINTAK%:::PHOS:::sample\_0%compd\_2001

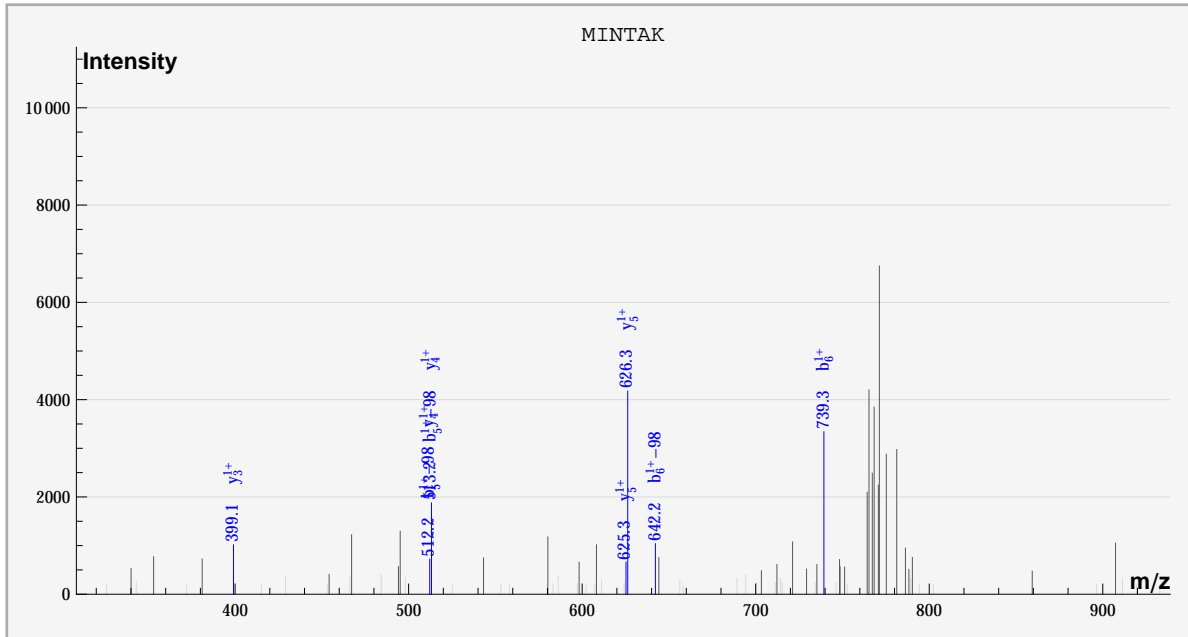

|   | # | b | b* | # | y | y* | P | P* |
|---|---|---|----|---|---|----|---|----|
| M | 1 |   |    |   |   |    |   |    |
| I | 2 |   |    | 5 | ✓ |    |   |    |
| N | 3 |   |    | 4 | ✓ |    |   |    |
| T | 4 |   |    | 3 | ✓ |    |   |    |
| A | 5 | ✓ | ✓  | 2 |   |    |   |    |
| K | 6 | ✓ | ✓  | 1 |   |    |   |    |

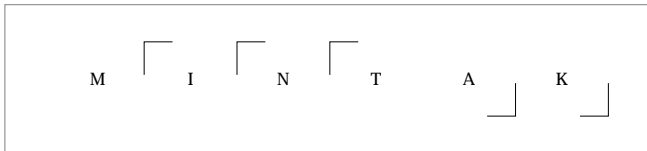

dbValid true MINTAK PHOS(1) 1. 759. -1.66862 5.71959 100. ? 3570.

S\_Acido\_new%gi|68568720|gb|AAY81649.1| MINTAK%:::PHOS:::sample\_0%compd\_2012

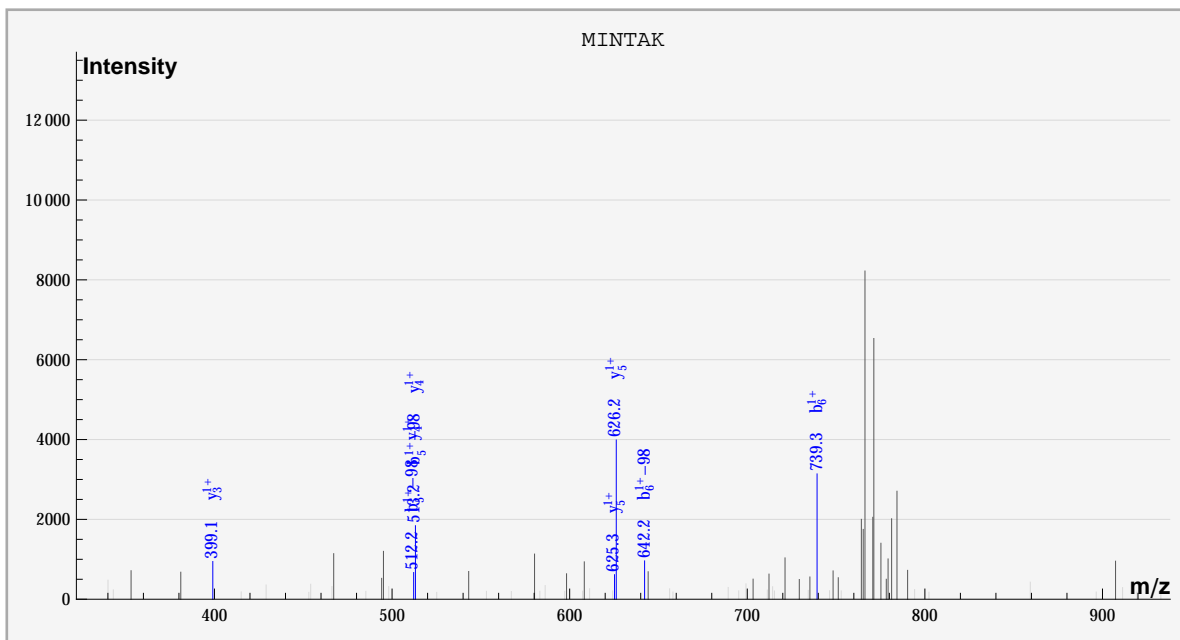

|   | # | b | b* | # | y | y* | P | P* |
|---|---|---|----|---|---|----|---|----|
| M | 1 |   |    |   |   |    |   |    |
| I | 2 |   |    | 5 | ✓ |    |   |    |
| N | 3 |   |    | 4 | ✓ |    |   |    |
| T | 4 |   |    | 3 | ✓ |    |   |    |
| A | 5 | ✓ | ✓  | 2 |   |    |   |    |
| K | 6 | ✓ | ✓  | 1 |   |    |   |    |

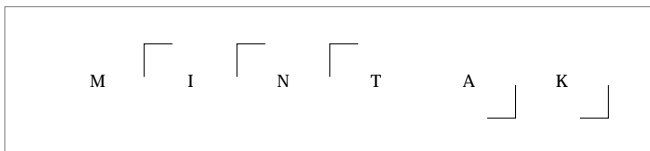

dbValid true MINTAK PHOS(1) 1. 759. -1.66862 5.24241 100. ? 3582.

S\_Acido\_new%gi|68568720|gb|AAY81649.1| MINTAK%:::PHOS:::sample\_0%compd\_2022

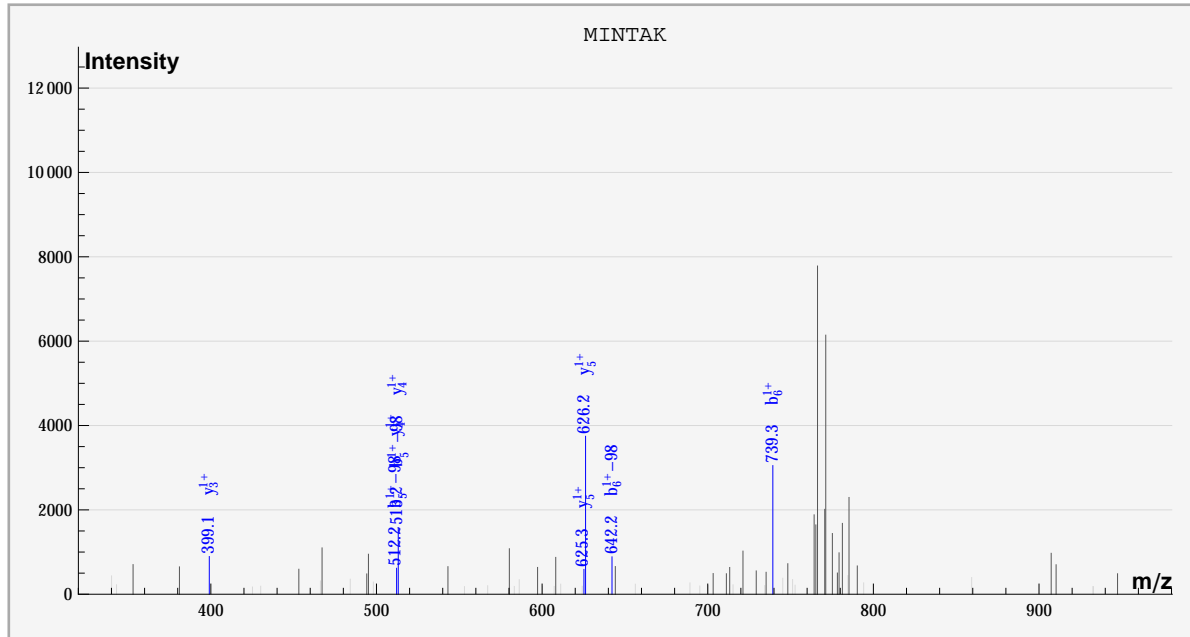

|   | # | b | b* | # | y | y* | P | P* |
|---|---|---|----|---|---|----|---|----|
| M | 1 |   |    |   |   |    |   |    |
| I | 2 |   |    | 5 | ✓ |    |   |    |
| N | 3 |   |    | 4 | ✓ |    |   |    |
| T | 4 |   |    | 3 | ✓ |    |   |    |
| A | 5 | ✓ | ✓  | 2 |   |    |   |    |
| K | 6 | ✓ | ✓  | 1 |   |    |   |    |



dbValid true MINTAK PHOS(1) 1. 759. -1.66862 5.3776 100. ? 3594.

S\_Acido\_new%gi|68568720|gb|AAY81649.1| MINTAK%:::PHOS:::sample\_0%compd\_2033

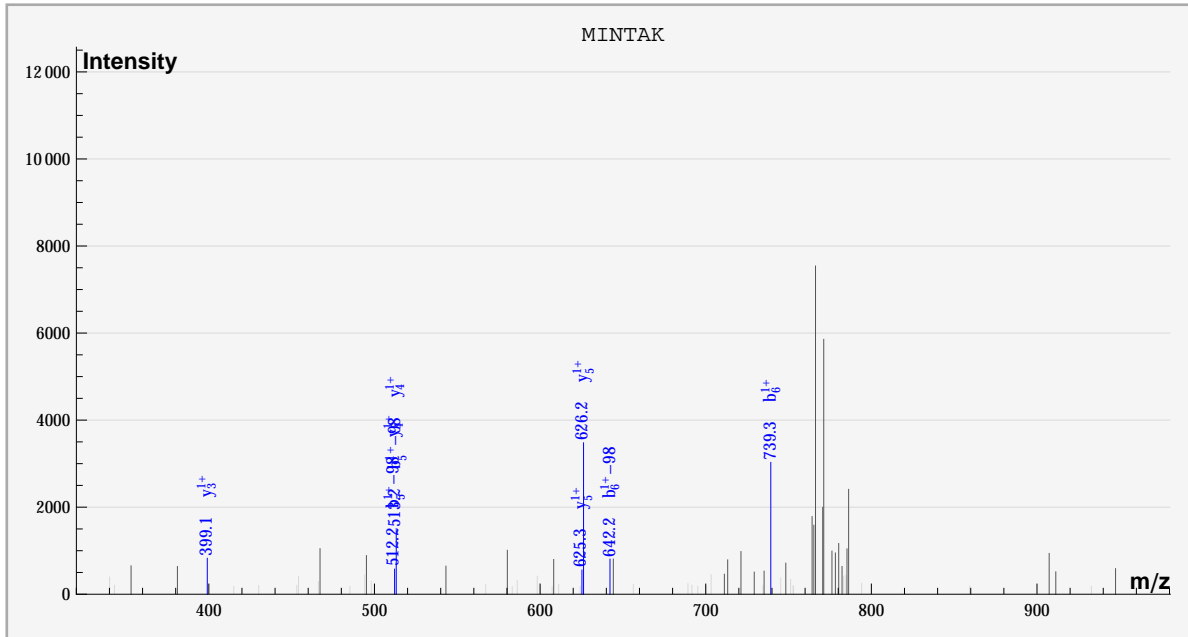

|   | # | b | b* | # | y | y* | P | P* |
|---|---|---|----|---|---|----|---|----|
| M | 1 |   |    |   |   |    |   |    |
| I | 2 |   |    | 5 | ✓ |    |   |    |
| N | 3 |   |    | 4 | ✓ |    |   |    |
| T | 4 |   |    | 3 | ✓ |    |   |    |
| A | 5 | ✓ | ✓  | 2 |   |    |   |    |
| K | 6 | ✓ | ✓  | 1 |   |    |   |    |



dbValid true MINTAK PHOS(1) 1. 759. -1.66862 5.36427 100. ? 3642.

S\_Acido\_new%gi|68568720|gb|AAY81649.1| MINTAK%:::PHOS:::sample\_0%compd\_2076

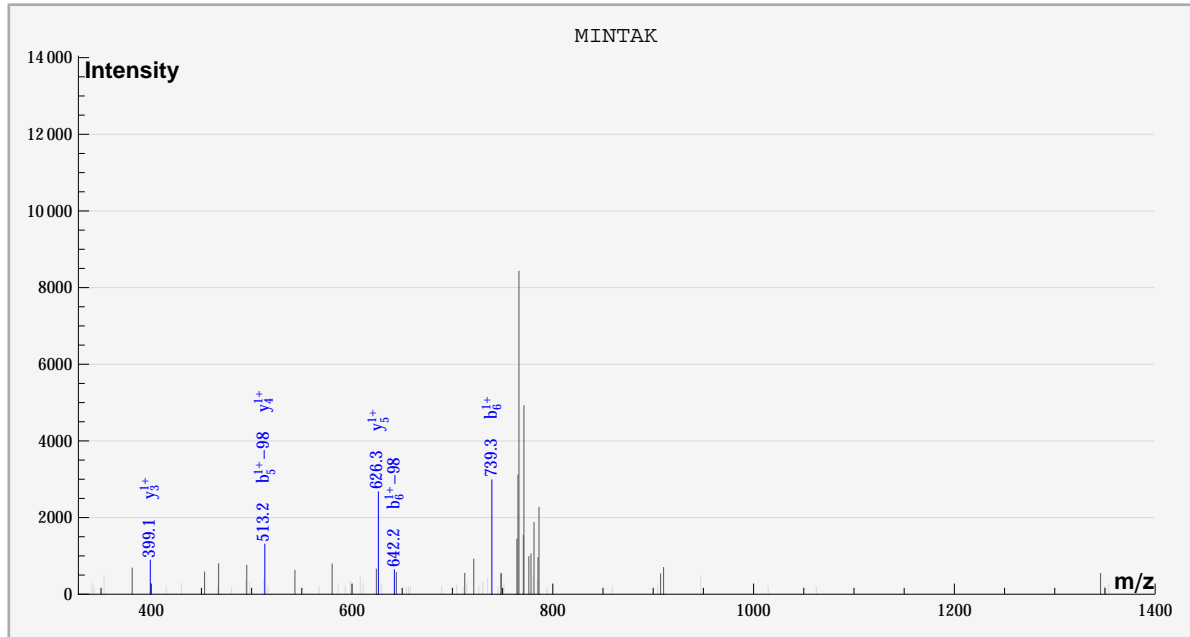

|   | # | b | b* | # | y | y* | P | P* |
|---|---|---|----|---|---|----|---|----|
| M | 1 |   |    |   |   |    |   |    |
| I | 2 |   |    | 5 | ✓ |    |   |    |
| N | 3 |   |    | 4 | ✓ |    |   |    |
| T | 4 |   |    | 3 | ✓ |    |   |    |
| A | 5 | ✓ | ✓  | 2 |   |    |   |    |
| K | 6 | ✓ | ✓  | 1 |   |    |   |    |

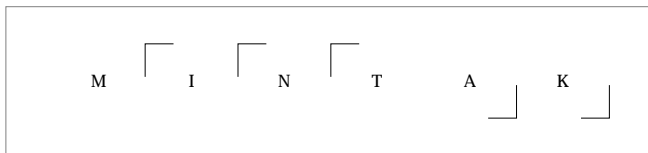



dbValid true MINTAK PHOS(1) 1. 759. -1.66862 5.18039 100. ? 3654.

S\_Acido\_new%gi|68568720|gb|AAY81649.1| MINTAK%:::PHOS:::sample\_0%compd\_2086

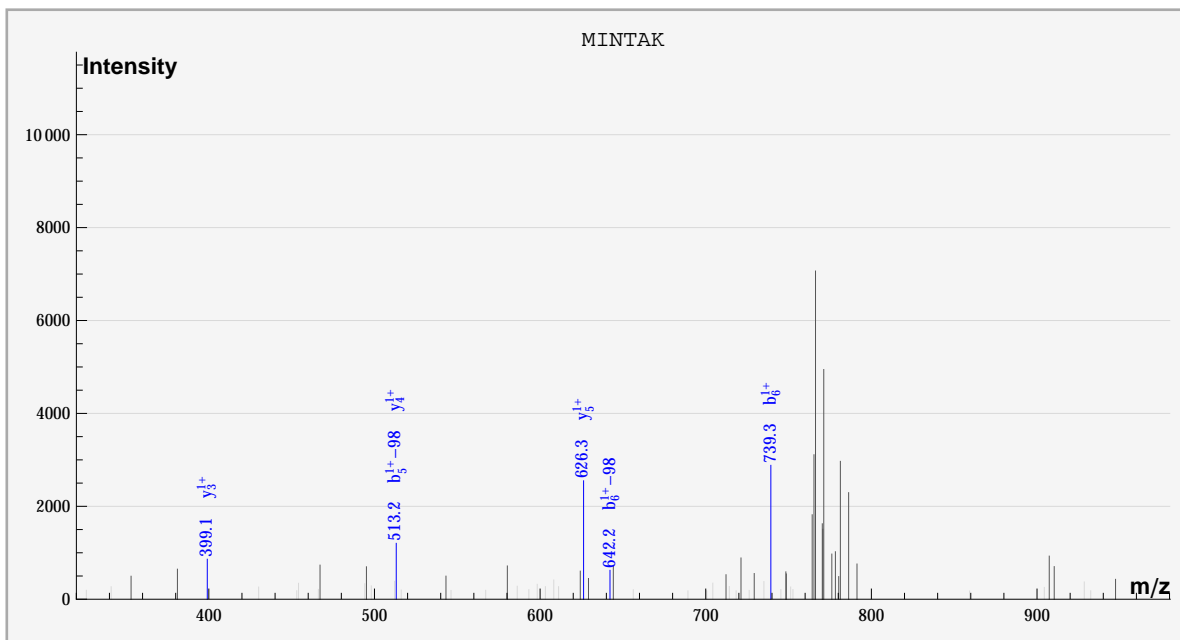

|   | # | b | b* | # | y | y* | P | P* |
|---|---|---|----|---|---|----|---|----|
| M | 1 |   |    |   |   |    |   |    |
| I | 2 |   |    | 5 | ✓ |    |   |    |
| N | 3 |   |    | 4 | ✓ |    |   |    |
| T | 4 |   |    | 3 | ✓ |    |   |    |
| A | 5 | ✓ | ✓  | 2 |   |    |   |    |
| K | 6 | ✓ | ✓  | 1 |   |    |   |    |



dbValid true MINTAK PHOS(1) 1. 759. -1.66862 5.14382 100. ? 3666.

S\_Acido\_new%gi|68568720|gb|AAY81649.1| MINTAK%:::PHOS:::sample\_0%compd\_2096

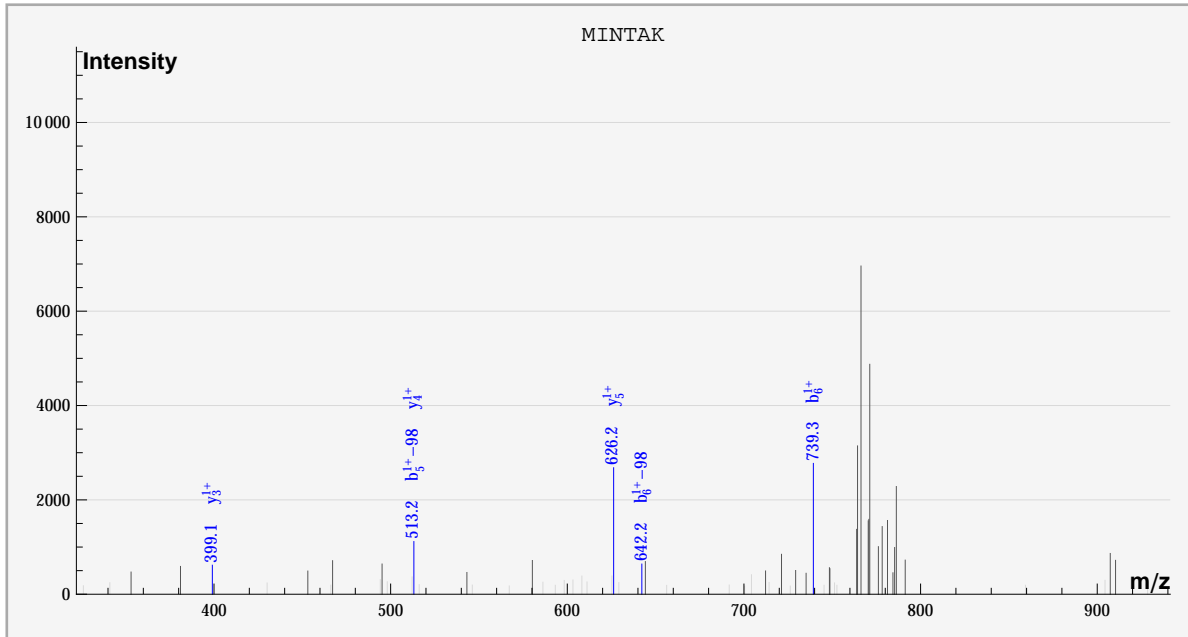

|   | # | b | b* | # | y | y* | P | P* |
|---|---|---|----|---|---|----|---|----|
| M | 1 |   |    |   |   |    |   |    |
| I | 2 |   |    | 5 | ✓ |    |   |    |
| N | 3 |   |    | 4 | ✓ |    |   |    |
| T | 4 |   |    | 3 | ✓ |    |   |    |
| A | 5 | ✓ | ✓  | 2 |   |    |   |    |
| K | 6 | ✓ | ✓  | 1 |   |    |   |    |



dbValid true YLKGSKDLLTK PHOS(2) 2. 761. 1.87732 5.60266 100. ? 3666.

S\_Acido\_new%gi|68567127|gb|AAY80056.1| YLKGSKDLLTK%:PHOS:::PHOS:::sample\_2%compd\_2210

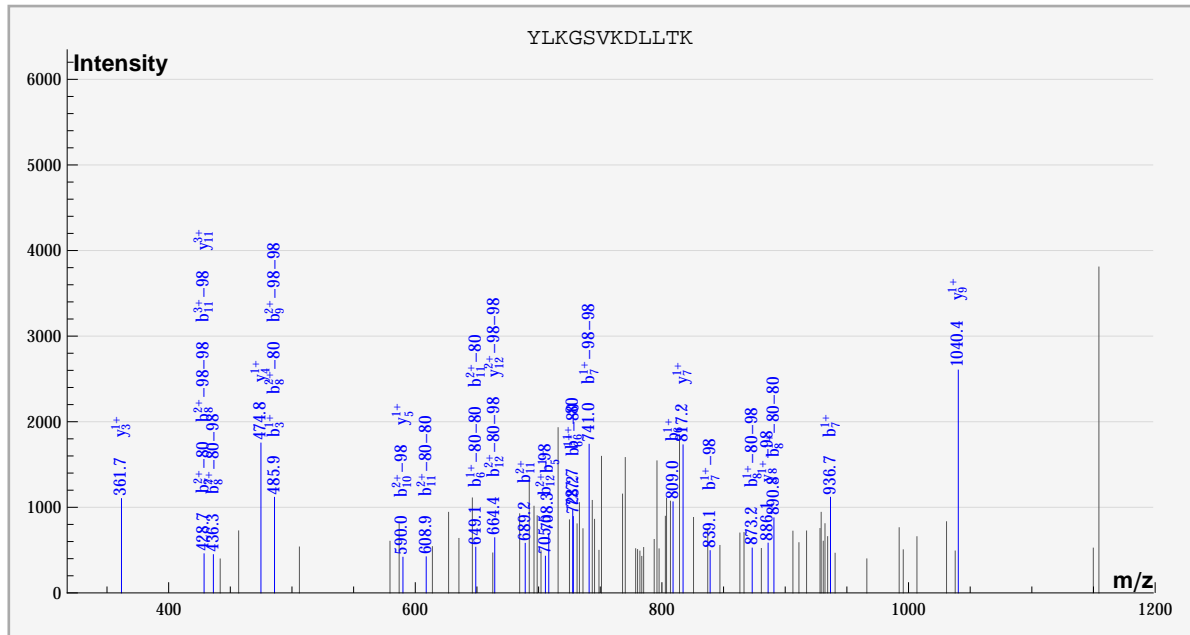

|   | #  | b | b* | #  | y | y* | P | P* |
|---|----|---|----|----|---|----|---|----|
| Y | 1  |   |    |    |   |    |   | ✓  |
| L | 2  |   |    | 11 | ✓ |    |   |    |
| K | 3  | ✓ |    | 10 |   |    |   |    |
| G | 4  |   |    | 9  | ✓ |    |   |    |
| S | 5  | ✓ |    | 8  |   | ✓  |   |    |
| V | 6  | ✓ | ✓  | 7  | ✓ |    |   |    |
| K | 7  | ✓ | ✓  | 6  |   |    |   |    |
| D | 8  |   | ✓  | 5  | ✓ |    |   |    |
| L | 9  |   | ✓  | 4  | ✓ |    |   |    |
| L | 10 |   | ✓  | 3  | ✓ |    |   |    |
| T | 11 | ✓ | ✓  | 2  |   |    |   |    |
| K | 12 |   | ✓  | 1  |   |    |   |    |

Y L K G S V K D L L T K

dbValid true KKDYEYLVLDLDR PHOS(1) 2. 761. 0.371062 5.19187 100. ? 4794.  
 S\_Acido\_new%gil68567929|gb|AAY80858.1| KKDYEYLVLDLDR%:::PHOS:::sample\_2%compd\_3239

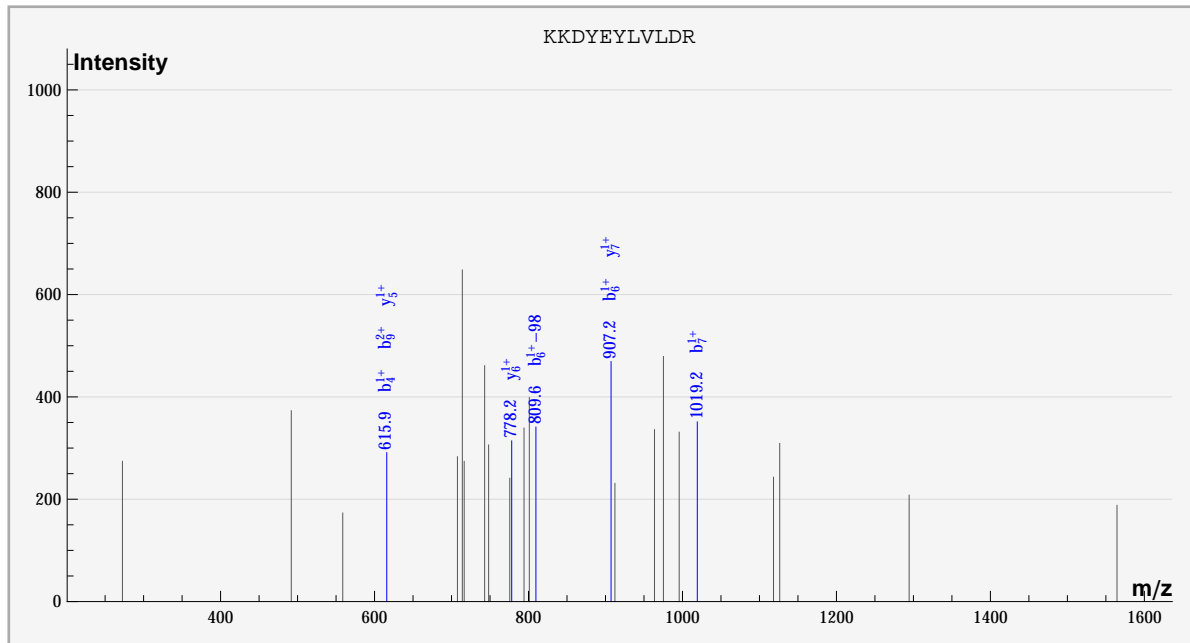

|   | #  | b | b* | #  | y | y* | P | P* |
|---|----|---|----|----|---|----|---|----|
| K | 1  |   |    |    |   |    |   |    |
| K | 2  |   |    | 10 |   |    |   |    |
| D | 3  |   |    | 9  |   |    |   |    |
| Y | 4  | ✓ |    | 8  |   |    |   |    |
| E | 5  |   |    | 7  | ✓ |    |   |    |
| Y | 6  | ✓ | ✓  | 6  | ✓ |    |   |    |
| L | 7  | ✓ |    | 5  | ✓ |    |   |    |
| V | 8  |   |    | 4  |   |    |   |    |
| L | 9  | ✓ |    | 3  |   |    |   |    |
| D | 10 |   |    | 2  |   |    |   |    |
| R | 11 |   |    | 1  |   |    |   |    |

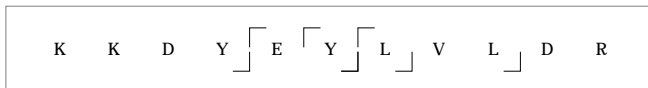

dbValid true SRAGYK PHOS(1) 1. 762. -0.665845 6.5743 100. ? 1758.  
 S\_Acido\_new%gi|68568120|gb|AAY81049.1| SRAGYK%:PHOS:::%sample\_2%compd\_470

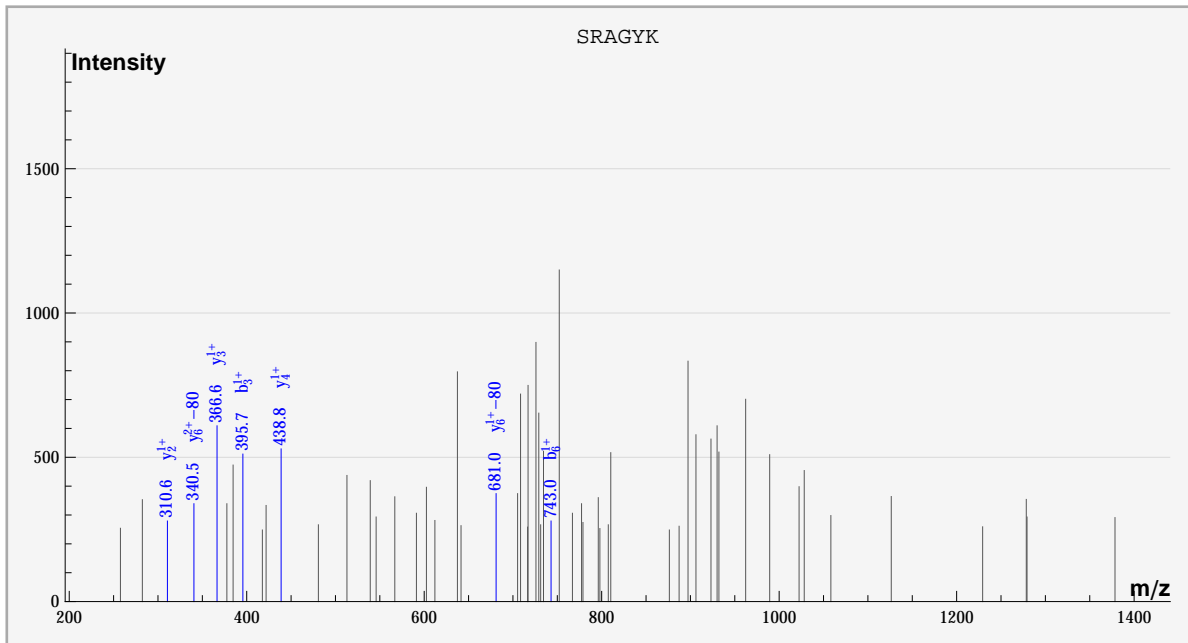

|   | # | b | b* | # | y | y* | P | P* |
|---|---|---|----|---|---|----|---|----|
| S | 1 |   |    |   |   |    |   | ✓  |
| R | 2 |   |    | 5 |   |    |   |    |
| A | 3 | ✓ |    | 4 | ✓ |    |   |    |
| G | 4 |   |    | 3 | ✓ |    |   |    |
| Y | 5 |   |    | 2 | ✓ |    |   |    |
| K | 6 | ✓ |    | 1 |   |    |   |    |

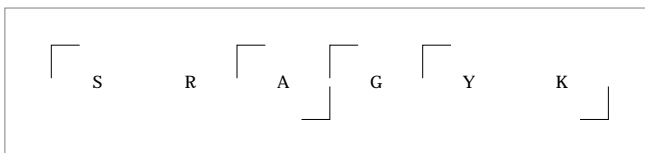

dbValid true YTTGLSEAMRR PHOS(3) 2. 762. 0.771342 5.57448 100. ? 3474.  
 S\_Acido\_new%gi|68567530|gb|AA80459.1| YTTGLSEAMRR%:PHOS:PHOS:PHOS:.....:sample\_1%compd\_1893

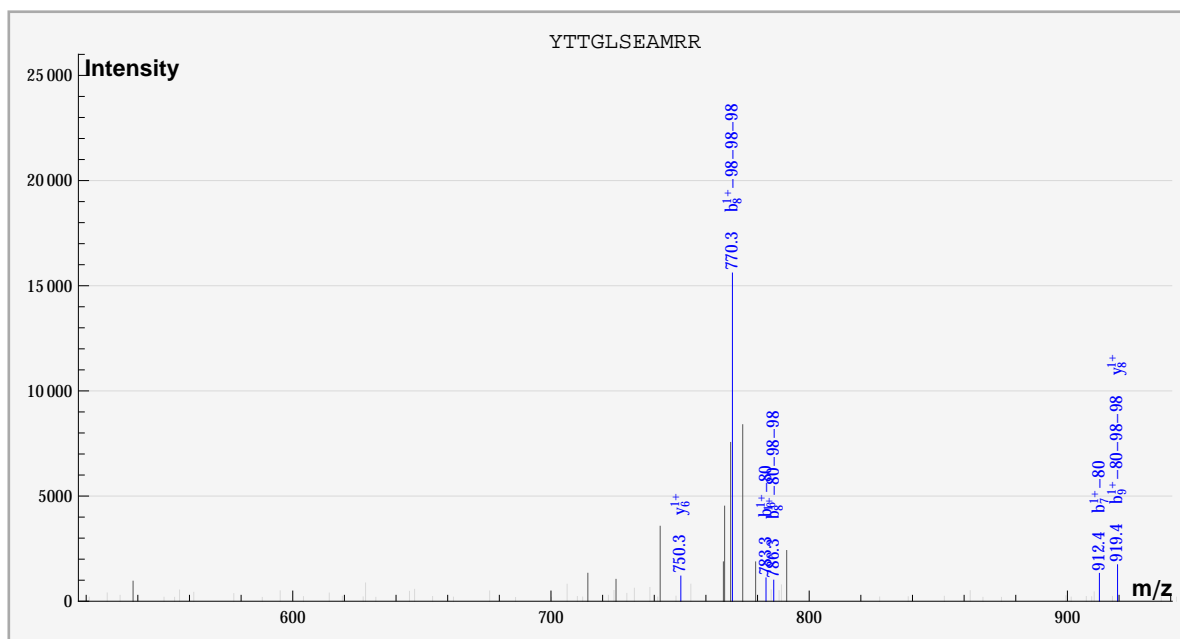

|   | #  | b | b* | #  | y | y* | P | P* |
|---|----|---|----|----|---|----|---|----|
| Y | 1  |   |    |    |   |    |   |    |
| T | 2  |   |    | 10 |   |    |   |    |
| T | 3  |   |    | 9  |   |    |   |    |
| G | 4  |   |    | 8  | ✓ |    |   |    |
| L | 5  |   |    | 7  |   |    |   |    |
| S | 6  | ✓ |    | 6  | ✓ |    |   |    |
| E | 7  | ✓ |    | 5  |   |    |   |    |
| A | 8  | ✓ |    | 4  |   |    |   |    |
| M | 9  | ✓ |    | 3  |   |    |   |    |
| R | 10 |   |    | 2  |   |    |   |    |
| R | 11 |   |    | 1  |   |    |   |    |

Y T T G L S E A M R R



dbValid true KKDYEYLVLD R PHOS(1) 2. 763. -1.62894 5.17221 100. ? 3426.  
 S\_Acido\_new%gil68567929|gb|AAY80858.1| KKDYEYLVLD R%::::PHOS:::::sample\_1%compd\_1854

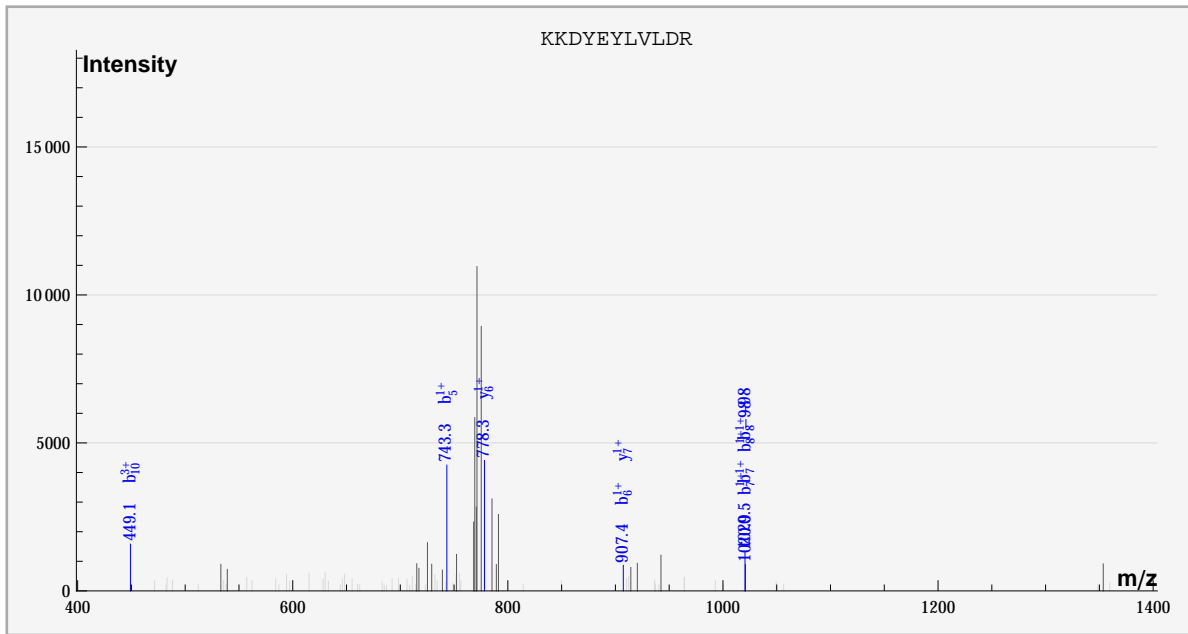

|   | #  | b | b* | #  | y | y* | P | P* |
|---|----|---|----|----|---|----|---|----|
| K | 1  |   |    |    |   |    |   |    |
| K | 2  |   |    | 10 |   |    |   |    |
| D | 3  |   |    | 9  |   |    |   |    |
| Y | 4  |   |    | 8  |   |    |   |    |
| E | 5  | ✓ |    | 7  | ✓ |    |   |    |
| Y | 6  | ✓ |    | 6  | ✓ |    |   |    |
| L | 7  | ✓ |    | 5  |   |    |   |    |
| V | 8  |   | ✓  | 4  |   |    |   |    |
| L | 9  |   |    | 3  |   |    |   |    |
| D | 10 | ✓ |    | 2  |   |    |   |    |
| R | 11 |   |    | 1  |   |    |   |    |

K K D Y [ E ] [ Y ] L [ V ] L D [ R ]



dbValid true KKDYEYLVLDLDR PHOS(1) 2. 763. -1.62894 5.17371 100. ? 3438.  
 S\_Acido\_new%gi|68567929|gb|AA80858.1| KKDYEYLVLDLDR%:::PHOS%:::sample\_1%compd\_1864

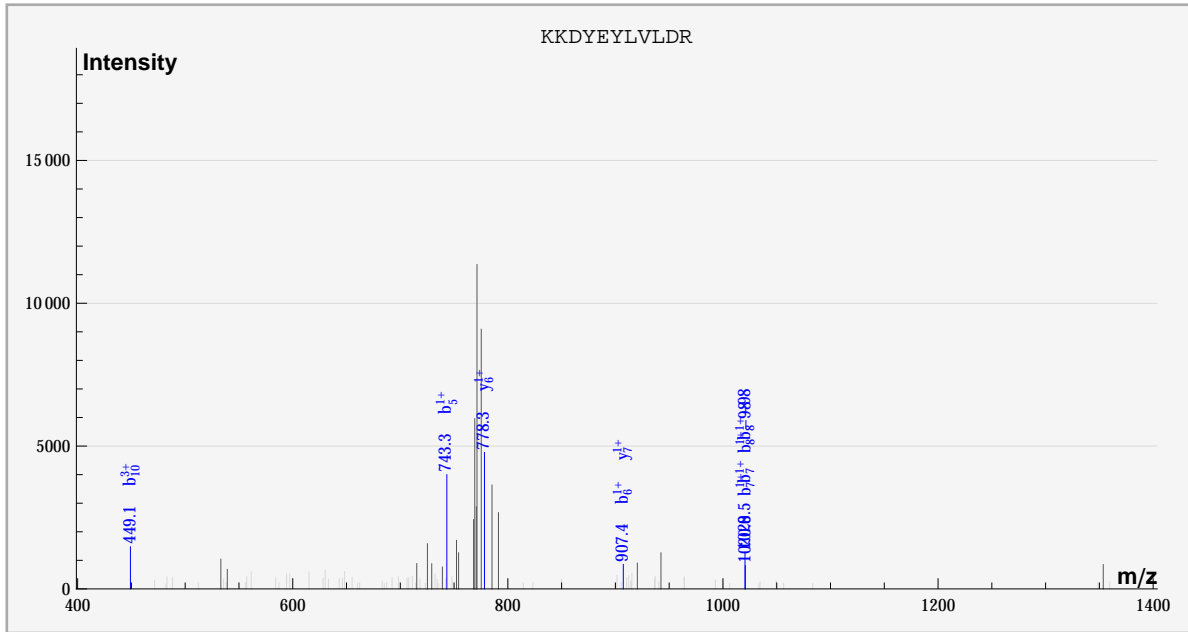

|   | #  | b | b* | #  | y | y* | P | P* |
|---|----|---|----|----|---|----|---|----|
| K | 1  |   |    |    |   |    |   |    |
| K | 2  |   |    | 10 |   |    |   |    |
| D | 3  |   |    | 9  |   |    |   |    |
| Y | 4  |   |    | 8  |   |    |   |    |
| E | 5  | ✓ |    | 7  | ✓ |    |   |    |
| Y | 6  | ✓ |    | 6  | ✓ |    |   |    |
| L | 7  | ✓ |    | 5  |   |    |   |    |
| V | 8  |   | ✓  | 4  |   |    |   |    |
| L | 9  |   |    | 3  |   |    |   |    |
| D | 10 | ✓ |    | 2  |   |    |   |    |
| R | 11 |   |    | 1  |   |    |   |    |

K K D Y E Y L V L D R

dbValid true KKDYEYLVLDLDR PHOS(1) 2. 763. -1.62894 6.19853 100. ? 4590.  
 S\_Acido\_new%gi|68567929|gb|AA80858.1| KKDYEYLVLDLDR%::::PHOS:::::sample\_2%compd\_3052

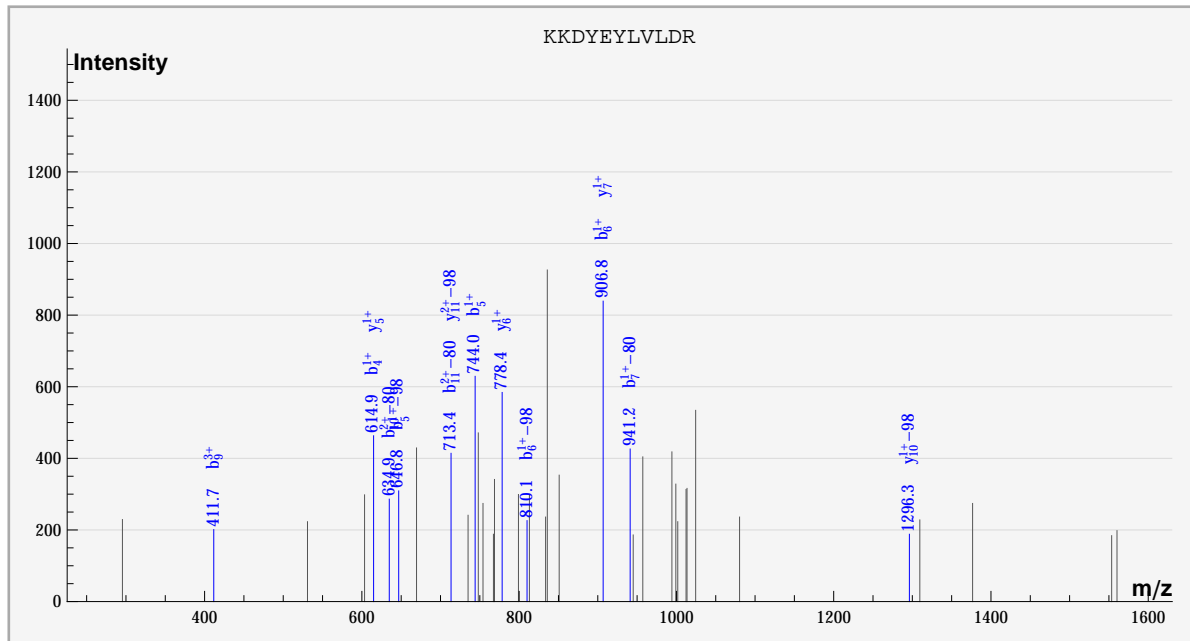

|   | #  | b | b* | #  | y | y* | P | P* |
|---|----|---|----|----|---|----|---|----|
| K | 1  |   |    |    |   |    |   | ✓  |
| K | 2  |   |    | 10 |   | ✓  |   |    |
| D | 3  |   |    | 9  |   |    |   |    |
| Y | 4  | ✓ |    | 8  |   |    |   |    |
| E | 5  | ✓ | ✓  | 7  | ✓ |    |   |    |
| Y | 6  | ✓ | ✓  | 6  | ✓ |    |   |    |
| L | 7  |   | ✓  | 5  | ✓ |    |   |    |
| V | 8  |   |    | 4  |   |    |   |    |
| L | 9  | ✓ |    | 3  |   |    |   |    |
| D | 10 |   | ✓  | 2  |   |    |   |    |
| R | 11 |   | ✓  | 1  |   |    |   |    |

┌ K ┌ K D Y ┌ E ┌ Y ┌ L ┌ V L ┌ D ┌ R ┌

dbValid true EGIKVIYLVPKGK PHOS(1) 2. 764. -1.56654 5.1157 100. ? 4746.  
 S\_Acido\_new%gi|68567271|gb|AA80200.1| EGIKVIYLVPKGK%:::PHOS:::sample\_2%compd\_3198

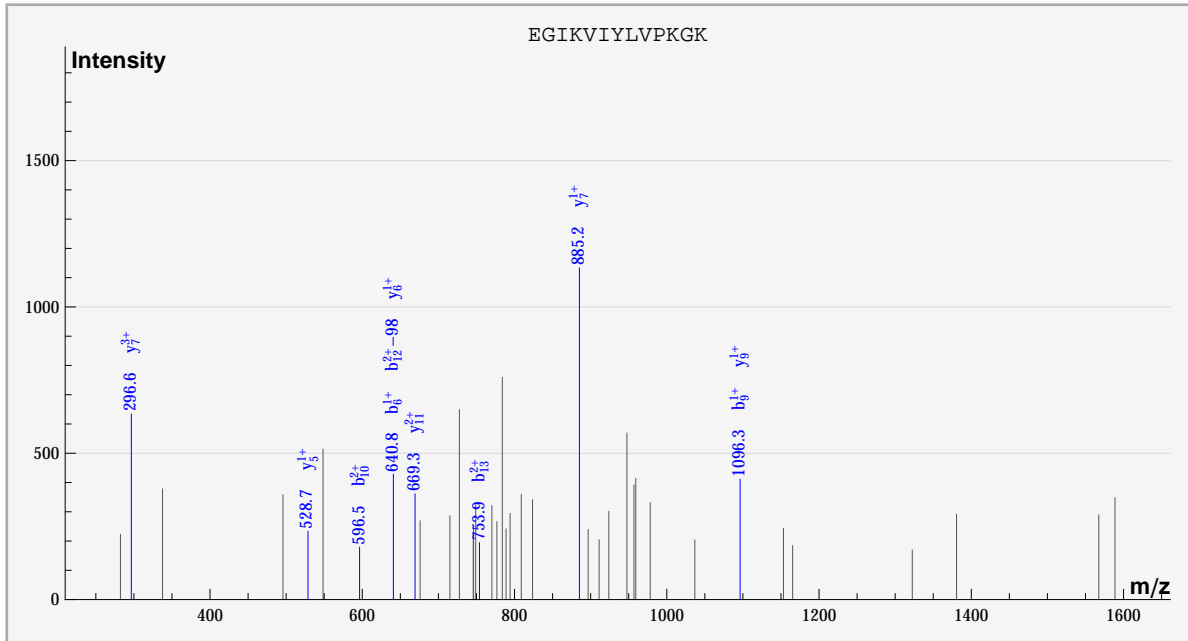

|   | #  | b | b* | #  | y | y* | P | P* |
|---|----|---|----|----|---|----|---|----|
| E | 1  |   |    |    |   |    |   |    |
| G | 2  |   |    | 12 |   |    |   |    |
| I | 3  |   |    | 11 | ✓ |    |   |    |
| K | 4  |   |    | 10 |   |    |   |    |
| V | 5  |   |    | 9  | ✓ |    |   |    |
| I | 6  | ✓ |    | 8  |   |    |   |    |
| Y | 7  |   |    | 7  | ✓ |    |   |    |
| L | 8  |   |    | 6  | ✓ |    |   |    |
| V | 9  | ✓ |    | 5  | ✓ |    |   |    |
| P | 10 | ✓ |    | 4  |   |    |   |    |
| K | 11 |   |    | 3  |   |    |   |    |
| G | 12 |   | ✓  | 2  |   |    |   |    |
| K | 13 | ✓ |    | 1  |   |    |   |    |

E G I K V I Y L V P K G K

dbValid true EYTIEFSQFRK PHOS(1) 2. 765. -0.652408 5.11093 100. ? 1038.  
 S\_Acido\_new%gi|68566565|gb|AAY79494.1| EYTIEFSQFRK%::PHOS:.....:sample\_3%compd\_3764

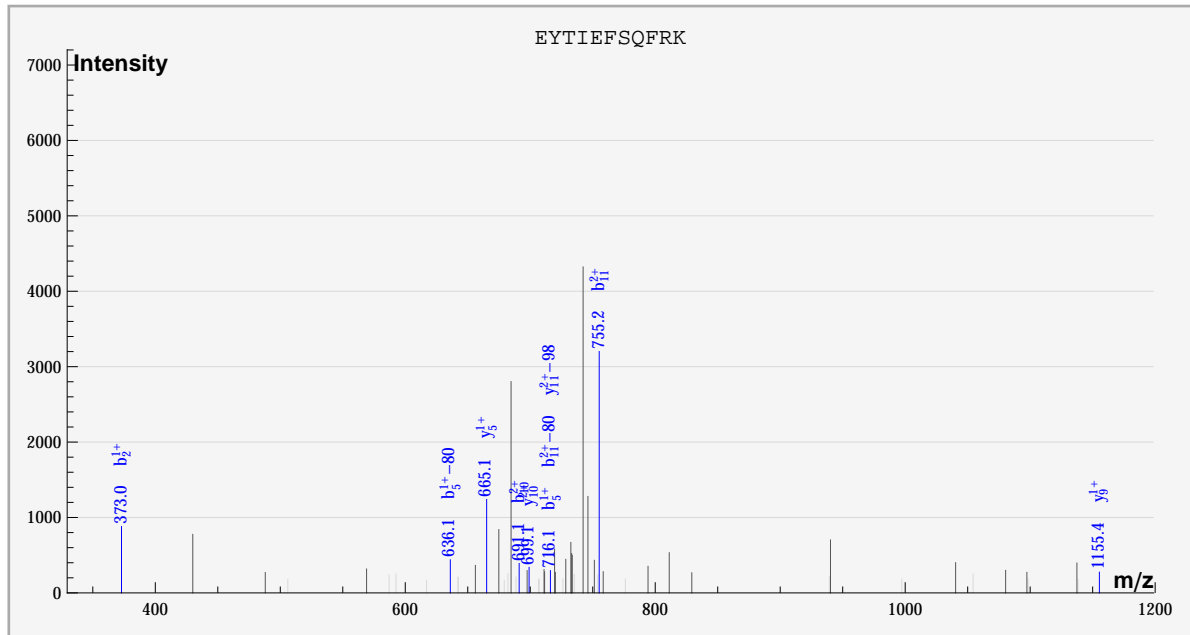

|   | #  | b | b* | #  | y | y* | P | P* |
|---|----|---|----|----|---|----|---|----|
| E | 1  |   |    |    |   |    |   | ✓  |
| Y | 2  | ✓ |    | 10 | ✓ |    |   |    |
| T | 3  |   |    | 9  | ✓ |    |   |    |
| I | 4  |   |    | 8  |   |    |   |    |
| E | 5  | ✓ | ✓  | 7  |   |    |   |    |
| F | 6  |   |    | 6  |   |    |   |    |
| S | 7  |   |    | 5  | ✓ |    |   |    |
| Q | 8  |   |    | 4  |   |    |   |    |
| F | 9  |   |    | 3  |   |    |   |    |
| R | 10 | ✓ |    | 2  |   |    |   |    |
| K | 11 | ✓ | ✓  | 1  |   |    |   |    |

「 E 「 Y 「 T I E 「 F 「 S Q F R 「 K 「

dbValid true EYTIEFSQFRK PHOS(1) 2. 765. -0.652408 5.30454 100. ? 1050.  
 S\_Acido\_new%gi|68566565|gb|AAY79494.1| EYTIEFSQFRK%::PHOS:::sample\_3%compd\_3775

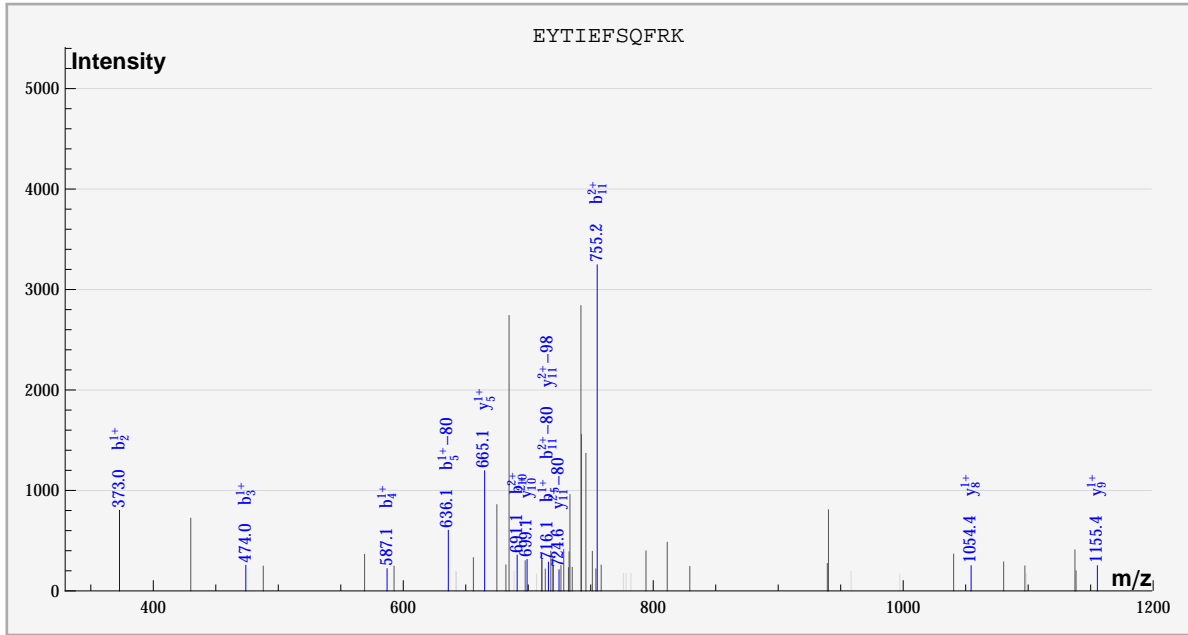

|   | #  | b | b* | #  | y | y* | P | P* |
|---|----|---|----|----|---|----|---|----|
| E | 1  |   |    |    |   |    |   | ✓  |
| Y | 2  | ✓ |    | 10 | ✓ |    |   |    |
| T | 3  | ✓ |    | 9  | ✓ |    |   |    |
| I | 4  | ✓ |    | 8  | ✓ |    |   |    |
| E | 5  | ✓ | ✓  | 7  |   |    |   |    |
| F | 6  |   |    | 6  |   |    |   |    |
| S | 7  |   |    | 5  | ✓ |    |   |    |
| Q | 8  |   |    | 4  |   |    |   |    |
| F | 9  |   |    | 3  |   |    |   |    |
| R | 10 | ✓ |    | 2  |   |    |   |    |
| K | 11 | ✓ | ✓  | 1  |   |    |   |    |

E Y T I E F S Q F R K

dbValid true EYTIEFSQFRK PHOS(1) 2. 765. -0.652408 5.55369 100. ? 1062.  
 S\_Acido\_new%gi|68566565|gb|AAY79494.1| EYTIEFSQFRK%::PHOS:.....:sample\_3%compd\_3786

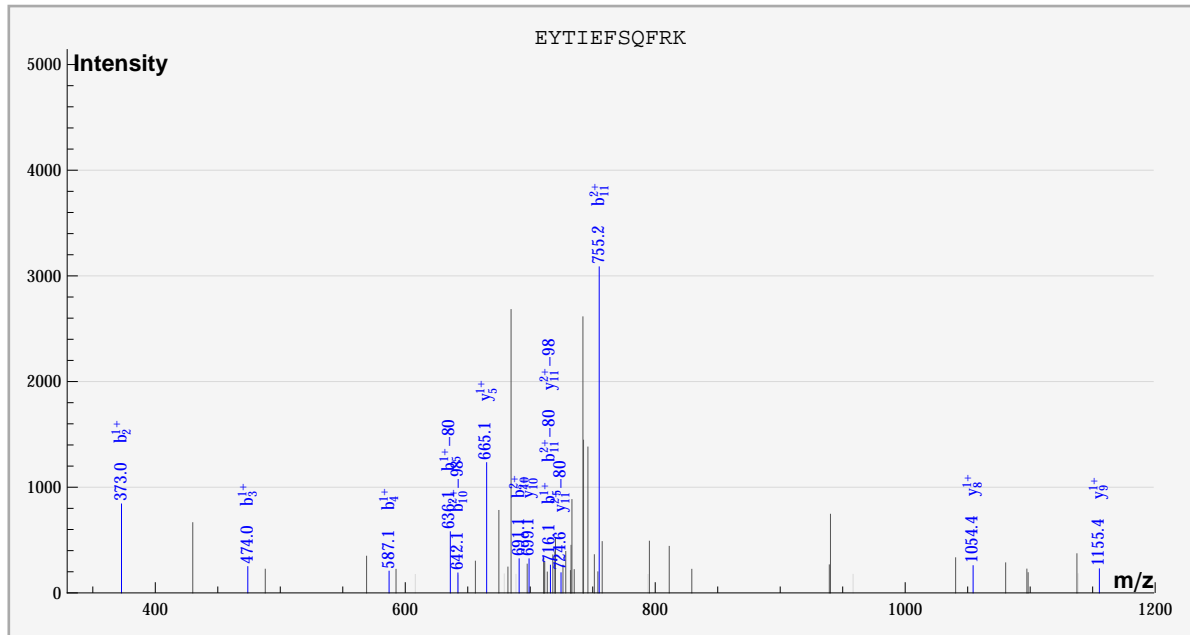

|   | #  | b | b* | #  | y | y* | P | P* |
|---|----|---|----|----|---|----|---|----|
| E | 1  |   |    |    |   |    |   | ✓  |
| Y | 2  | ✓ |    | 10 | ✓ |    |   |    |
| T | 3  | ✓ |    | 9  | ✓ |    |   |    |
| I | 4  | ✓ |    | 8  | ✓ |    |   |    |
| E | 5  | ✓ | ✓  | 7  |   |    |   |    |
| F | 6  |   |    | 6  |   |    |   |    |
| S | 7  |   |    | 5  | ✓ |    |   |    |
| Q | 8  |   |    | 4  |   |    |   |    |
| F | 9  |   |    | 3  |   |    |   |    |
| R | 10 | ✓ | ✓  | 2  |   |    |   |    |
| K | 11 | ✓ | ✓  | 1  |   |    |   |    |

[ E ] [ Y ] [ T ] [ I ] [ E ] [ F ] [ S ] [ Q ] [ F ] [ R ] [ K ]

dbValid true EYTIEFSQFRK PHOS(1) 2. 765. -0.652408 5.24957 100. ? 1074.  
 S\_Acido\_new%gil68566565|gb|AAY79494.1| EYTIEFSQFRK%::PHOS:.....:sample\_3%compd\_3797

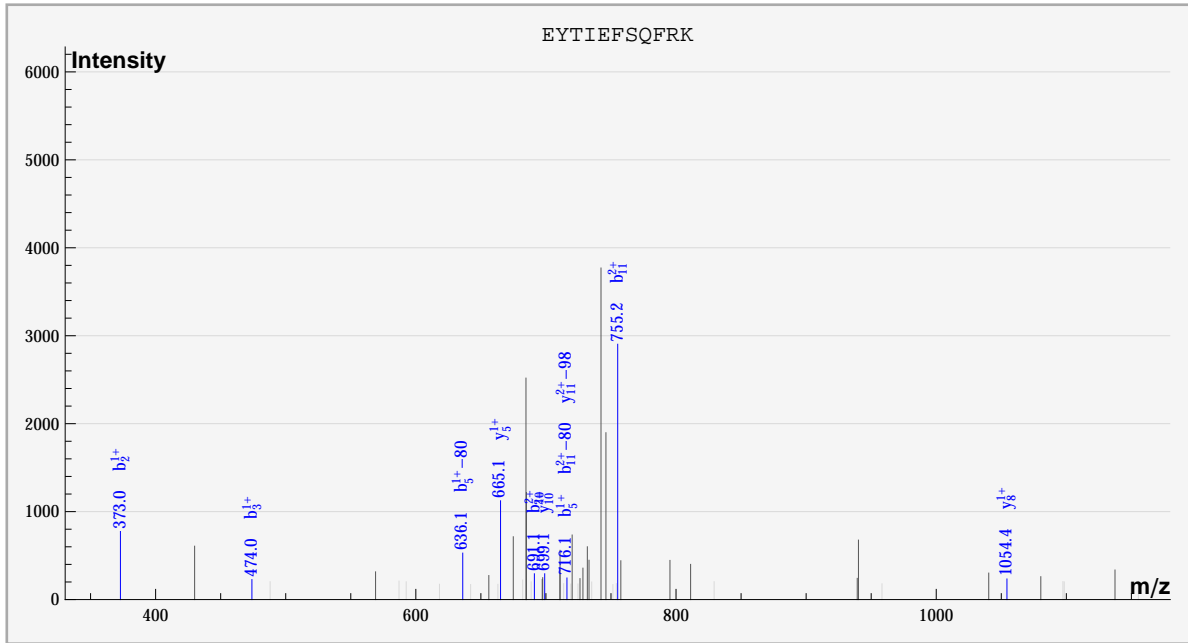

|   | #  | b | b* | #  | y | y* | P | P* |
|---|----|---|----|----|---|----|---|----|
| E | 1  |   |    |    |   |    |   | ✓  |
| Y | 2  | ✓ |    | 10 | ✓ |    |   |    |
| T | 3  | ✓ |    | 9  |   |    |   |    |
| I | 4  |   |    | 8  | ✓ |    |   |    |
| E | 5  | ✓ | ✓  | 7  |   |    |   |    |
| F | 6  |   |    | 6  |   |    |   |    |
| S | 7  |   |    | 5  | ✓ |    |   |    |
| Q | 8  |   |    | 4  |   |    |   |    |
| F | 9  |   |    | 3  |   |    |   |    |
| R | 10 | ✓ |    | 2  |   |    |   |    |
| K | 11 | ✓ | ✓  | 1  |   |    |   |    |

E Y T I E F S Q F R K

dbValid true EYTIEFSQFRK PHOS(1) 2. 765. -0.652408 5.69056 100. ? 1086.  
 S\_Acido\_new%gil68566565|gb|AA79494.1| EYTIEFSQFRK%::PHOS:.....:sample\_3%compd\_3807

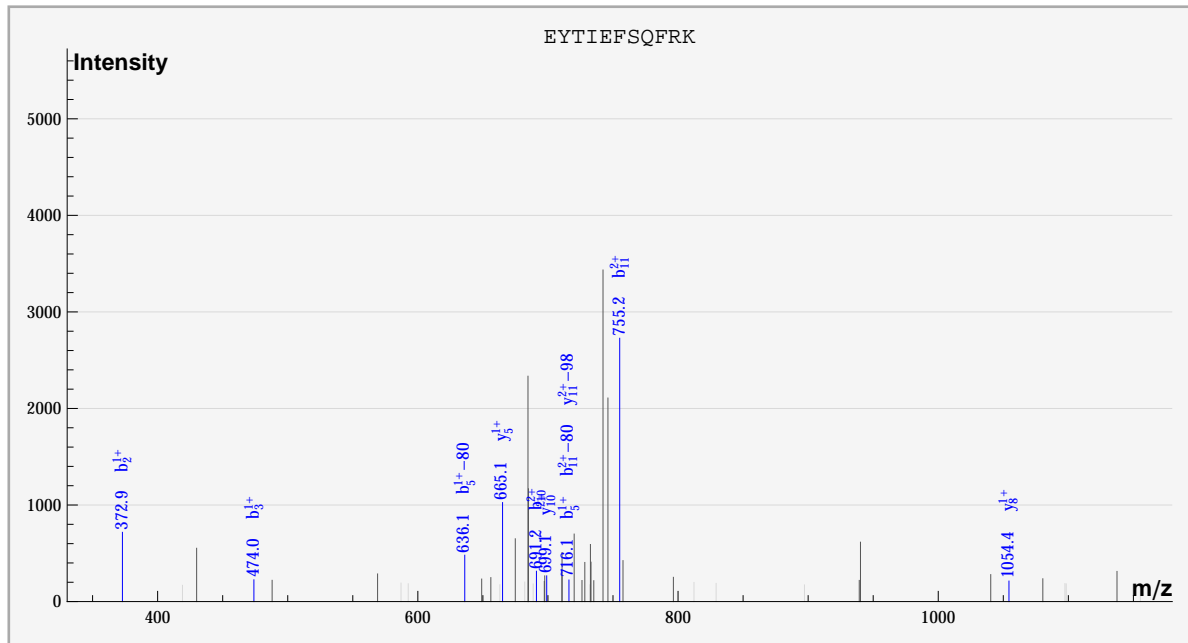

|   | #  | b | b* | #  | y | y* | P | P* |
|---|----|---|----|----|---|----|---|----|
| E | 1  |   |    |    |   |    |   | ✓  |
| Y | 2  | ✓ |    | 10 | ✓ |    |   |    |
| T | 3  | ✓ |    | 9  |   |    |   |    |
| I | 4  |   |    | 8  | ✓ |    |   |    |
| E | 5  | ✓ | ✓  | 7  |   |    |   |    |
| F | 6  |   |    | 6  |   |    |   |    |
| S | 7  |   |    | 5  | ✓ |    |   |    |
| Q | 8  |   |    | 4  |   |    |   |    |
| F | 9  |   |    | 3  |   |    |   |    |
| R | 10 | ✓ |    | 2  |   |    |   |    |
| K | 11 | ✓ | ✓  | 1  |   |    |   |    |

E Y T I E F S Q F R K



dbValid true EYTIEFSQFRK PHOS(1) 2. 765. -0.652408 5.75883 100. ? 1098.  
 S\_Acido\_new%gi|68566565|gb|AA79494.1| EYTIEFSQFRK%::PHOS:::sample\_3%compd\_3818

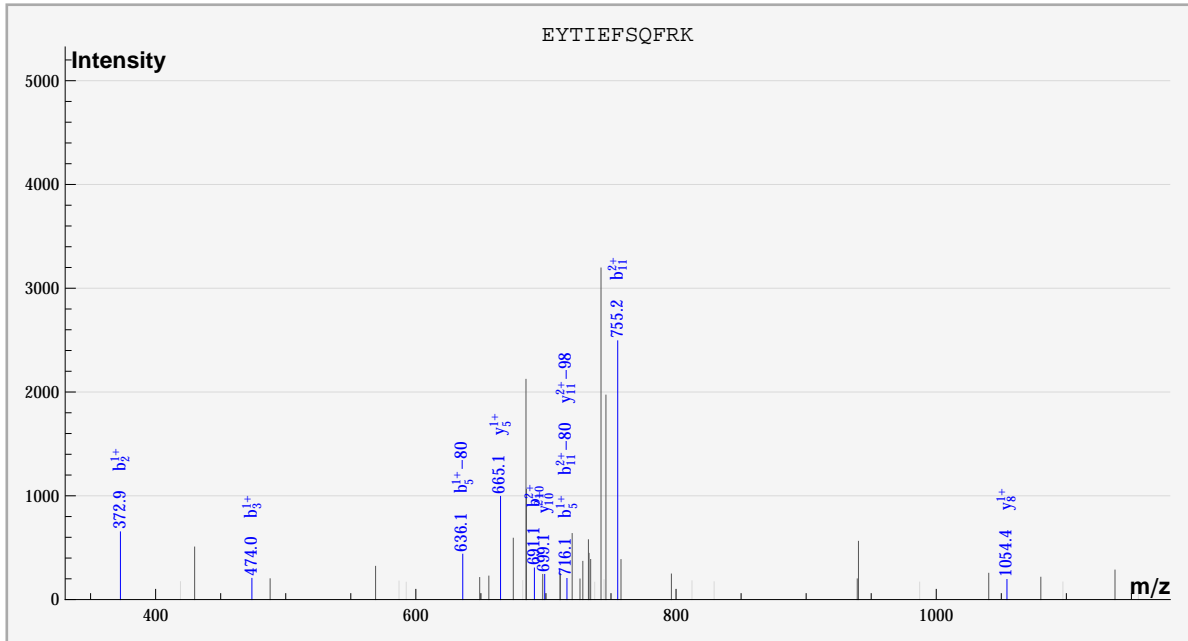

|   | #  | b | b* | #  | y | y* | P | P* |
|---|----|---|----|----|---|----|---|----|
| E | 1  |   |    |    |   |    |   | ✓  |
| Y | 2  | ✓ |    | 10 | ✓ |    |   |    |
| T | 3  | ✓ |    | 9  |   |    |   |    |
| I | 4  |   |    | 8  | ✓ |    |   |    |
| E | 5  | ✓ | ✓  | 7  |   |    |   |    |
| F | 6  |   |    | 6  |   |    |   |    |
| S | 7  |   |    | 5  | ✓ |    |   |    |
| Q | 8  |   |    | 4  |   |    |   |    |
| F | 9  |   |    | 3  |   |    |   |    |
| R | 10 | ✓ |    | 2  |   |    |   |    |
| K | 11 | ✓ | ✓  | 1  |   |    |   |    |

E Y T I E F S Q F R K

dbValid true EYTIEFSQFRK PHOS(1) 2. 766. -1.65241 5.25956 100. ? 1692.  
 S\_Acido\_new%gi|68566565|gb|AA79494.1| EYTIEFSQFRK%::PHOS:.....:sample\_1%compd\_377

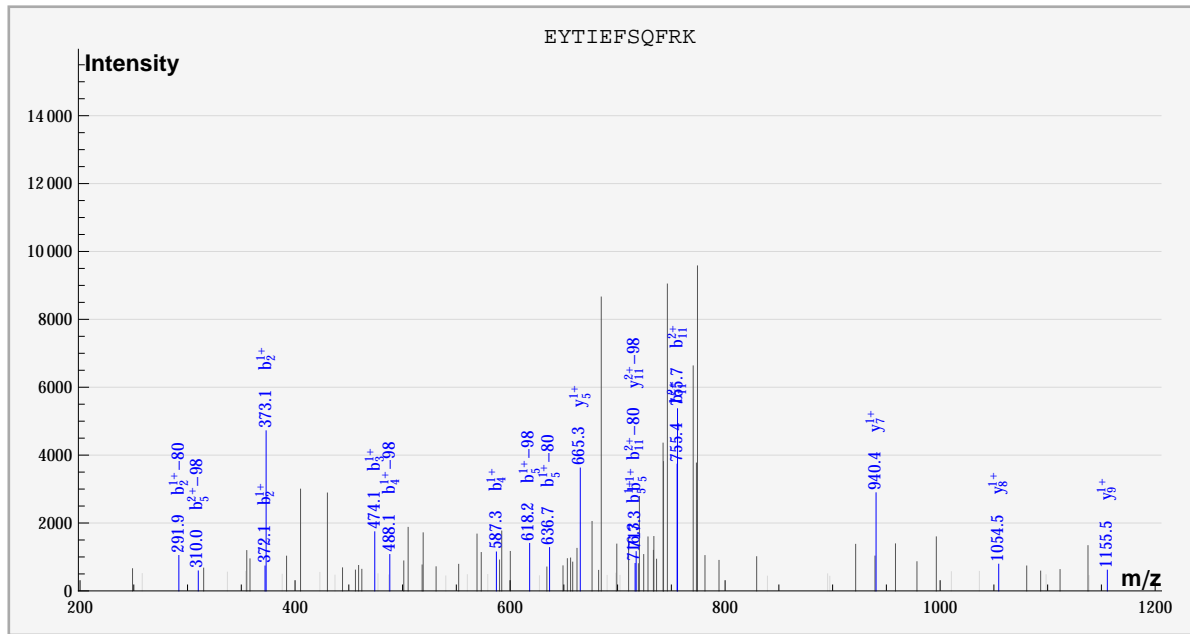

|   | #  | b | b* | #  | y | y* | P | P* |
|---|----|---|----|----|---|----|---|----|
| E | 1  |   |    |    |   |    |   | ✓  |
| Y | 2  | ✓ | ✓  | 10 |   |    |   |    |
| T | 3  | ✓ |    | 9  | ✓ |    |   |    |
| I | 4  | ✓ | ✓  | 8  | ✓ |    |   |    |
| E | 5  | ✓ | ✓  | 7  | ✓ |    |   |    |
| F | 6  |   |    | 6  |   |    |   |    |
| S | 7  |   |    | 5  | ✓ |    |   |    |
| Q | 8  |   |    | 4  |   |    |   |    |
| F | 9  |   |    | 3  |   |    |   |    |
| R | 10 |   |    | 2  |   |    |   |    |
| K | 11 | ✓ | ✓  | 1  |   |    |   |    |

E Y T I E F S Q F R K

dbValid true EYTIEFSQFRK PHOS(1) 2. 766. -1.65241 5.21424 100. ? 1854.  
 S\_Acido\_new%gil68566565|gb|AAY79494.1| EYTIEFSQFRK%::PHOS:::sample\_2%compd\_561

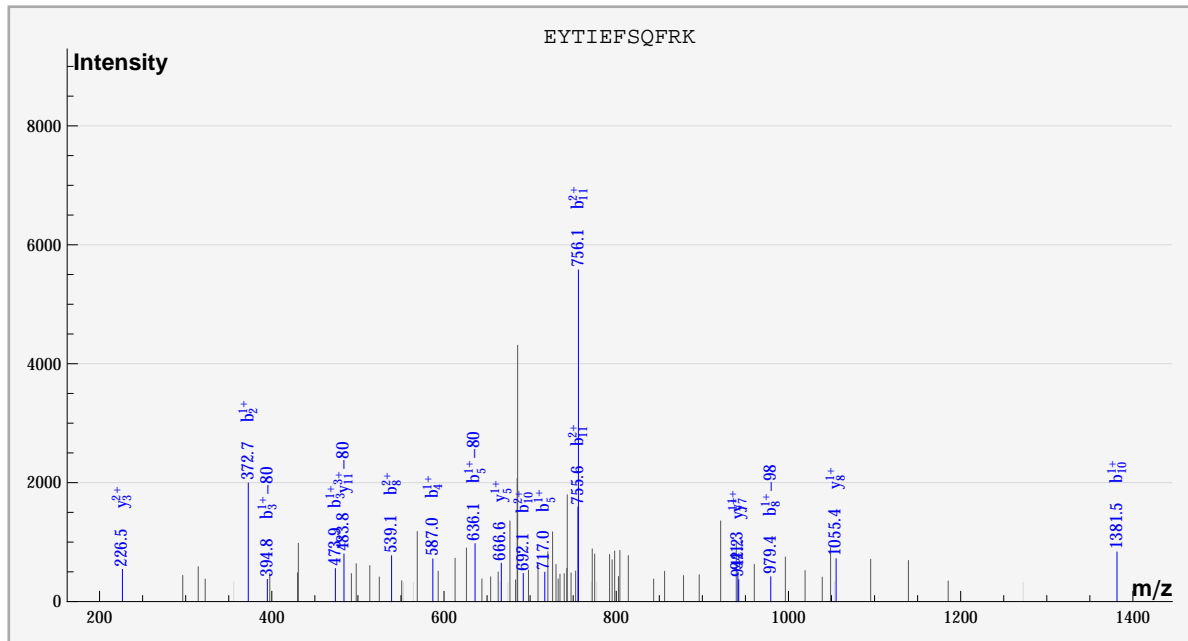

|   | #  | b | b* | #  | y | y* | P | P* |
|---|----|---|----|----|---|----|---|----|
| E | 1  |   |    |    |   |    |   | ✓  |
| Y | 2  | ✓ |    | 10 |   |    |   |    |
| T | 3  | ✓ | ✓  | 9  |   |    |   |    |
| I | 4  | ✓ |    | 8  | ✓ |    |   |    |
| E | 5  | ✓ | ✓  | 7  | ✓ |    |   |    |
| F | 6  |   |    | 6  |   |    |   |    |
| S | 7  |   |    | 5  | ✓ |    |   |    |
| Q | 8  | ✓ | ✓  | 4  |   |    |   |    |
| F | 9  |   |    | 3  | ✓ |    |   |    |
| R | 10 | ✓ |    | 2  |   |    |   |    |
| K | 11 | ✓ |    | 1  |   |    |   |    |

E Y T I E F S Q F R K

dbValid true NCMSYLEEETR Cys\_CAM(1),Oxidation\_M(1),PHOS(1) 2. 766. -1.72181 5.1555 100. ? 1860.  
 S\_Acido\_new%gij68568133|gb|AAY81062.1| NCMSYLEEETR%::Cys\_CAM:Oxidation\_M:PHOS:::sample\_1%compd\_520

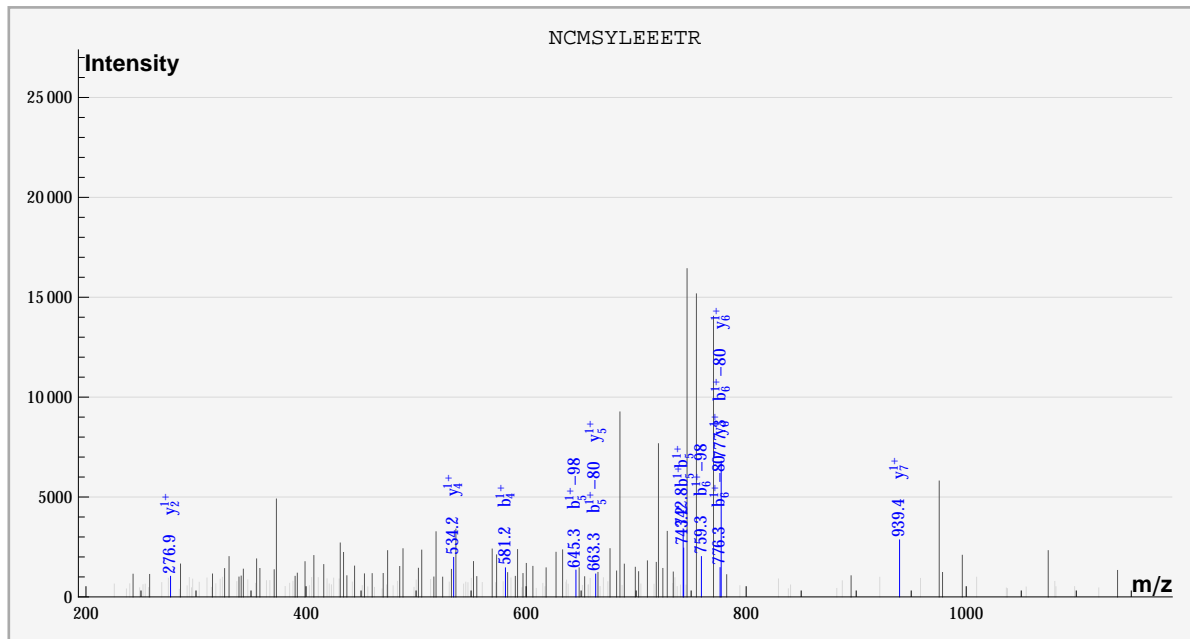

|   | #  | b | b* | #  | y | y* | P | P* |
|---|----|---|----|----|---|----|---|----|
| N | 1  |   |    |    |   |    |   |    |
| C | 2  |   |    | 10 |   |    |   |    |
| M | 3  |   |    | 9  |   |    |   |    |
| S | 4  | ✓ |    | 8  |   |    |   |    |
| Y | 5  | ✓ | ✓  | 7  | ✓ |    |   |    |
| L | 6  |   | ✓  | 6  | ✓ |    |   |    |
| E | 7  |   |    | 5  | ✓ |    |   |    |
| E | 8  |   |    | 4  | ✓ |    |   |    |
| E | 9  |   |    | 3  |   |    |   |    |
| T | 10 |   |    | 2  | ✓ |    |   |    |
| R | 11 |   |    | 1  |   |    |   |    |

N C M S Y L E E E T R

dbValid true SHSIK PHOS(1) 1. 766. -1.6298 5.06896 100. ? 2088.  
 S\_Acido\_new%gi|68567122|gb|AAY80051.1| SHSIK%:PHOS::::::%sample\_1%cmpd\_714

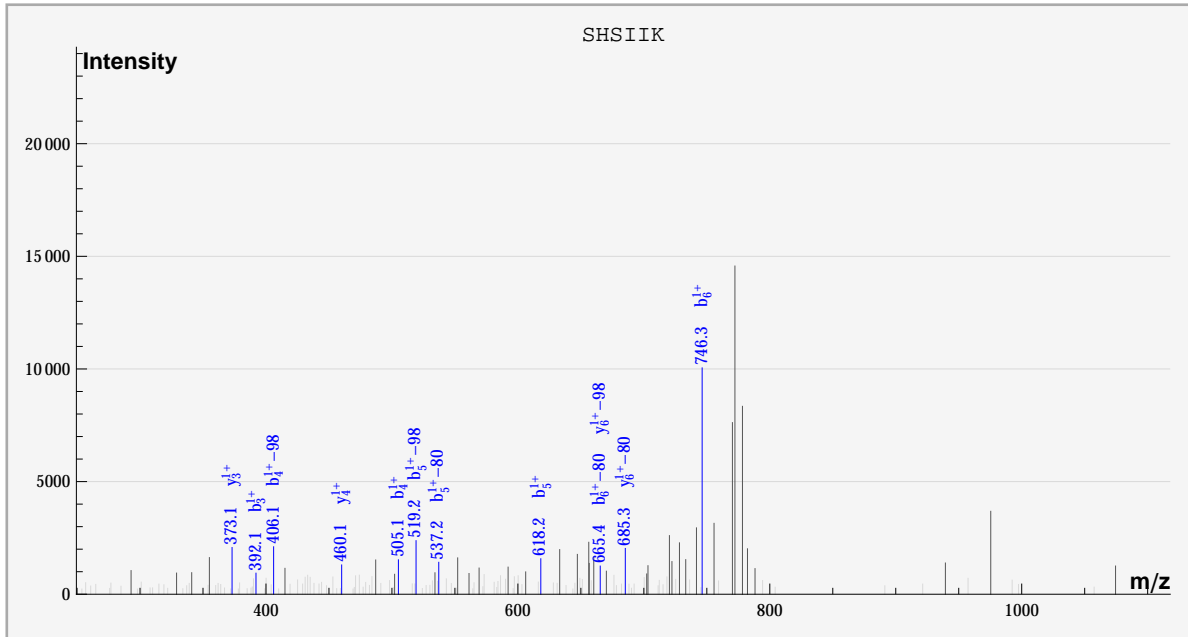

|   | # | b | b* | # | y | y* | P | P* |
|---|---|---|----|---|---|----|---|----|
| S | 1 |   |    |   |   |    |   | ✓  |
| H | 2 |   |    | 5 |   |    |   |    |
| S | 3 | ✓ |    | 4 | ✓ |    |   |    |
| I | 4 | ✓ | ✓  | 3 | ✓ |    |   |    |
| I | 5 | ✓ | ✓  | 2 |   |    |   |    |
| K | 6 | ✓ | ✓  | 1 |   |    |   |    |

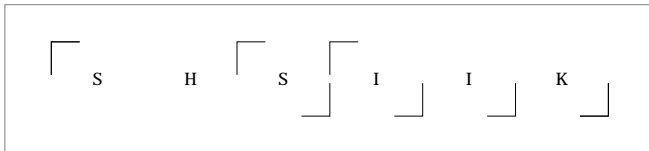

dbValid true YWKAYLDAYKK PHOS(1) 2. 766. -1.13458 5.31207 100. ? 4044.  
 S\_Acido\_new%gi|68568649|gb|AA81578.1| YWKAYLDAYKK%:PHOS:::sample\_2%compd\_2559

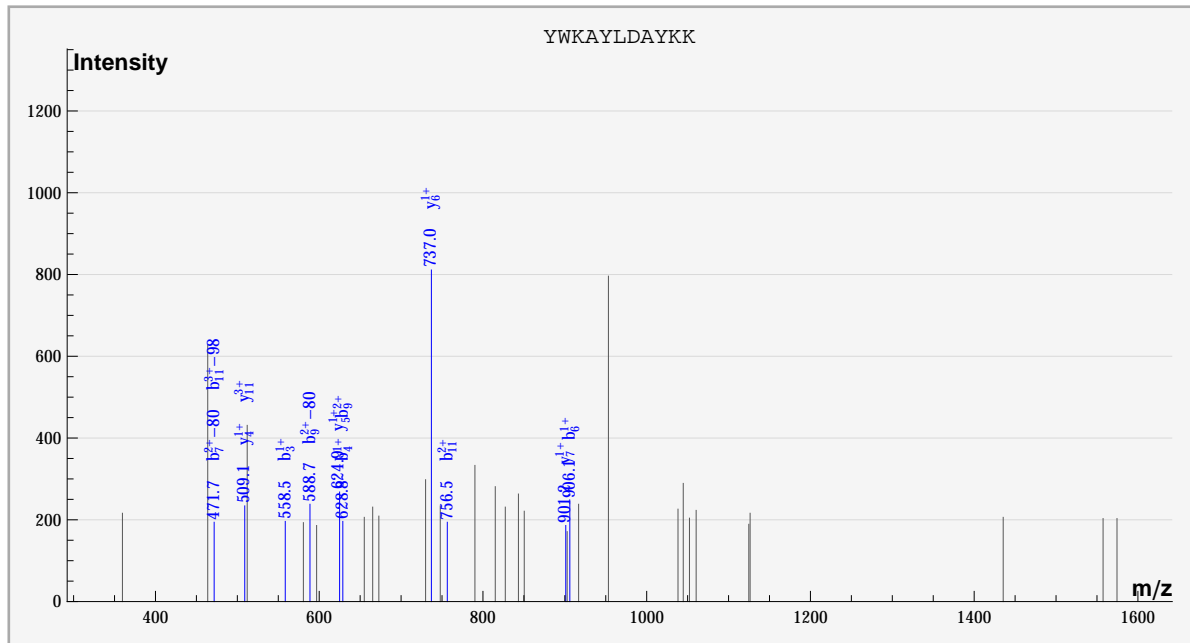

|   | #  | b | b* | #  | y | y* | P | P* |
|---|----|---|----|----|---|----|---|----|
| Y | 1  |   |    |    |   |    |   | ✓  |
| W | 2  |   |    | 10 |   |    |   |    |
| K | 3  | ✓ |    | 9  |   |    |   |    |
| A | 4  | ✓ |    | 8  |   |    |   |    |
| Y | 5  |   |    | 7  | ✓ |    |   |    |
| L | 6  | ✓ |    | 6  | ✓ |    |   |    |
| D | 7  |   | ✓  | 5  | ✓ |    |   |    |
| A | 8  |   |    | 4  | ✓ |    |   |    |
| Y | 9  | ✓ | ✓  | 3  |   |    |   |    |
| K | 10 |   |    | 2  |   |    |   |    |
| K | 11 | ✓ | ✓  | 1  |   |    |   |    |

Y W K A Y L D A Y K K

dbValid true WVSSEILTINK PHOS(3) 2. 767. -1.69192 5.14445 100. ? 1506.

S\_Acido\_new%gij68566506|gb|AAY79435.1| WVSSEILTINK%:::PHOS:PHOS:::PHOS:::sample\_2%cmpd\_251

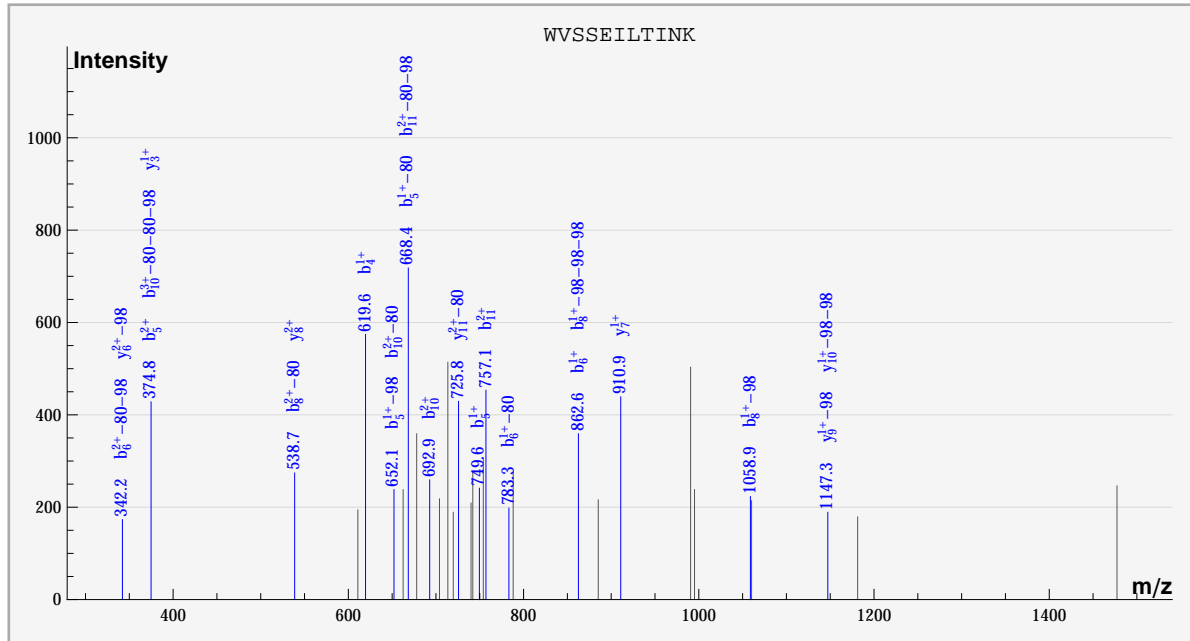

|   | #  | b | b* | #  | y | y* | P | P* |
|---|----|---|----|----|---|----|---|----|
| W | 1  |   |    |    |   |    |   | ✓  |
| V | 2  |   |    | 10 |   |    |   | ✓  |
| S | 3  |   |    | 9  |   |    |   | ✓  |
| S | 4  | ✓ |    | 8  | ✓ |    |   | ✓  |
| E | 5  | ✓ | ✓  | 7  | ✓ |    |   |    |
| I | 6  | ✓ | ✓  | 6  |   | ✓  |   |    |
| L | 7  |   |    | 5  | ✓ |    |   |    |
| T | 8  |   | ✓  | 4  |   |    |   |    |
| I | 9  |   |    | 3  | ✓ |    |   |    |
| N | 10 | ✓ | ✓  | 2  |   |    |   |    |
| K | 11 | ✓ | ✓  | 1  |   |    |   |    |

W V S S E I L T I N K

dbValid true LPNTIK PHOS(1) 1. 767. -1.6094 5.27571 100. ? 2430.  
 S\_Acido\_new%gi68568211|gb|AAY81140.1| LPNTIK%::::PHOS:::sample\_2%compd\_1083

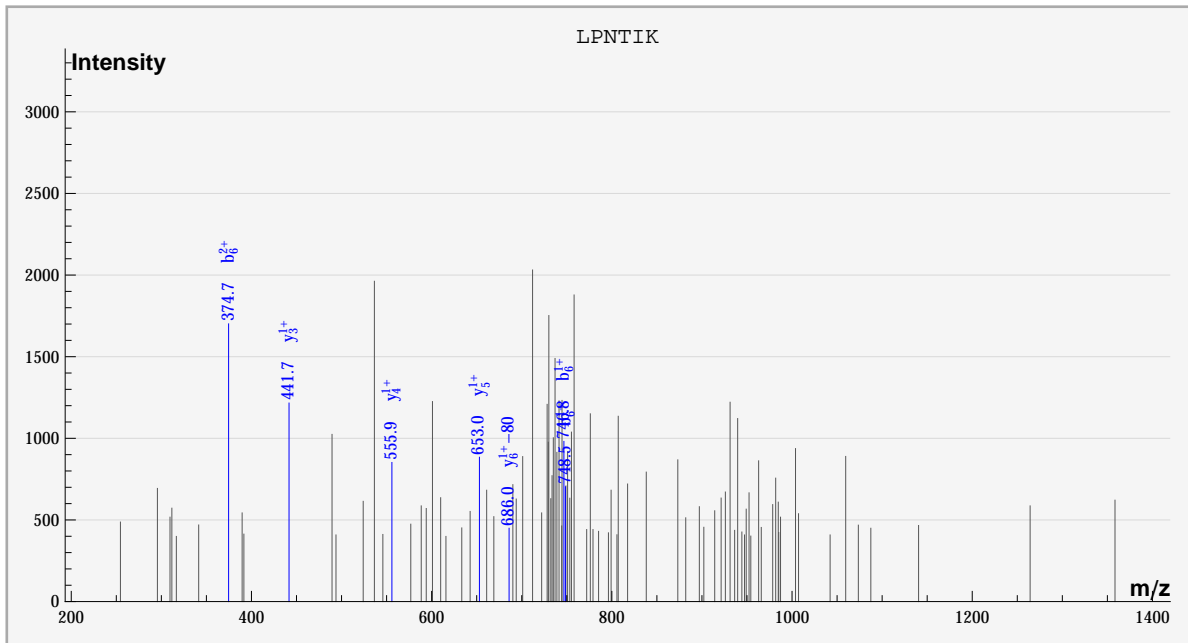

|   | # | b | b* | # | y | y* | P | P* |
|---|---|---|----|---|---|----|---|----|
| L | 1 |   |    |   |   |    |   | ✓  |
| P | 2 |   |    | 5 | ✓ |    |   |    |
| N | 3 |   |    | 4 | ✓ |    |   |    |
| T | 4 |   |    | 3 | ✓ |    |   |    |
| I | 5 |   |    | 2 |   |    |   |    |
| K | 6 | ✓ |    | 1 |   |    |   |    |

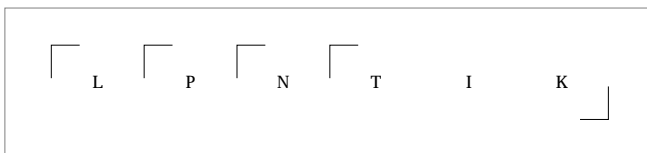



dbValid true MRFSIGDVRKPK Oxidation\_M(1),PHOS(1) 2. 767. -1.61348 5.06367 100. ? 2508.  
 S\_Acido\_new%gi|68566913|gb|AAY79842.1| MRFSIGDVRKPK%:Oxidation\_M::PHOS:::sample\_3%compd\_1071

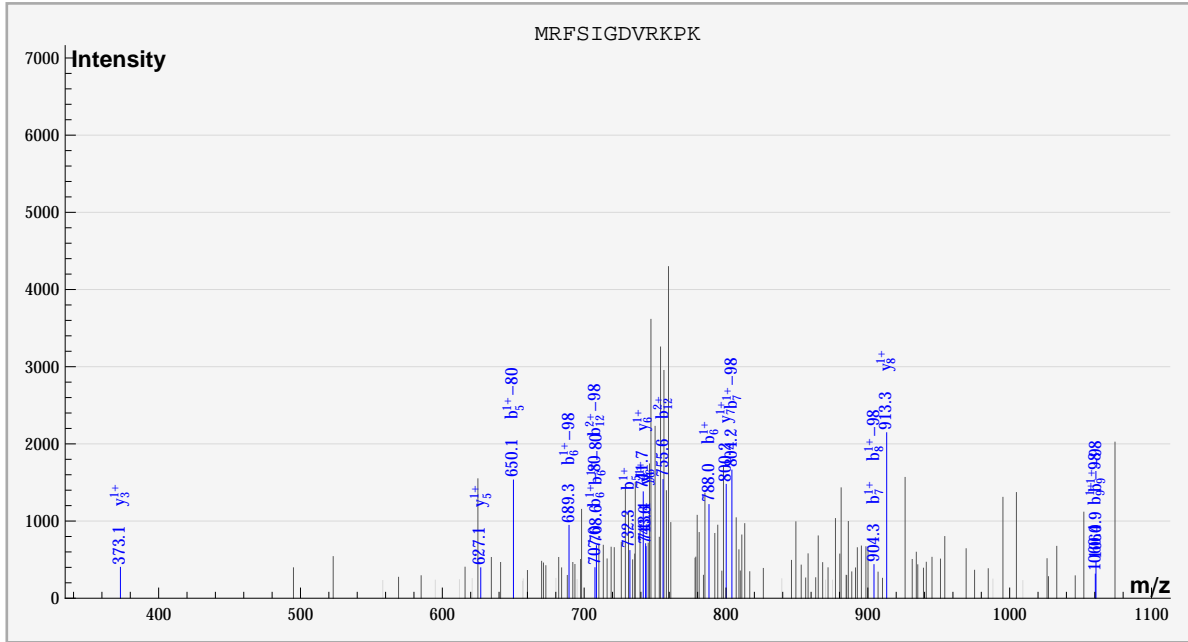

|   | #  | b | b* | #  | y | y* | P | P* |
|---|----|---|----|----|---|----|---|----|
| M | 1  |   |    |    |   |    |   |    |
| R | 2  |   |    | 11 |   |    |   |    |
| F | 3  |   |    | 10 |   |    |   |    |
| S | 4  |   |    | 9  |   |    |   |    |
| I | 5  | ✓ | ✓  | 8  | ✓ |    |   |    |
| G | 6  | ✓ | ✓  | 7  | ✓ |    |   |    |
| D | 7  | ✓ | ✓  | 6  | ✓ |    |   |    |
| V | 8  |   | ✓  | 5  | ✓ |    |   |    |
| R | 9  |   | ✓  | 4  |   |    |   |    |
| K | 10 |   |    | 3  | ✓ |    |   |    |
| P | 11 |   |    | 2  |   |    |   |    |
| K | 12 | ✓ | ✓  | 1  |   |    |   |    |

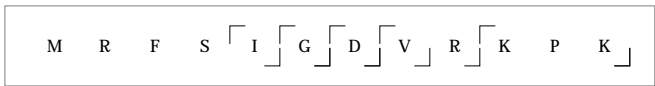

dbValid true AVATVIEGGTITSR PHOS(2) 2. 767. 0.849292 5.50591 100. ? 2514.  
 S\_Acido\_new%gi|68568029|gb|AAV80958.1| AVATVIEGGTITSR%.....PHOS::PHOS::%sample\_2%compd\_1161

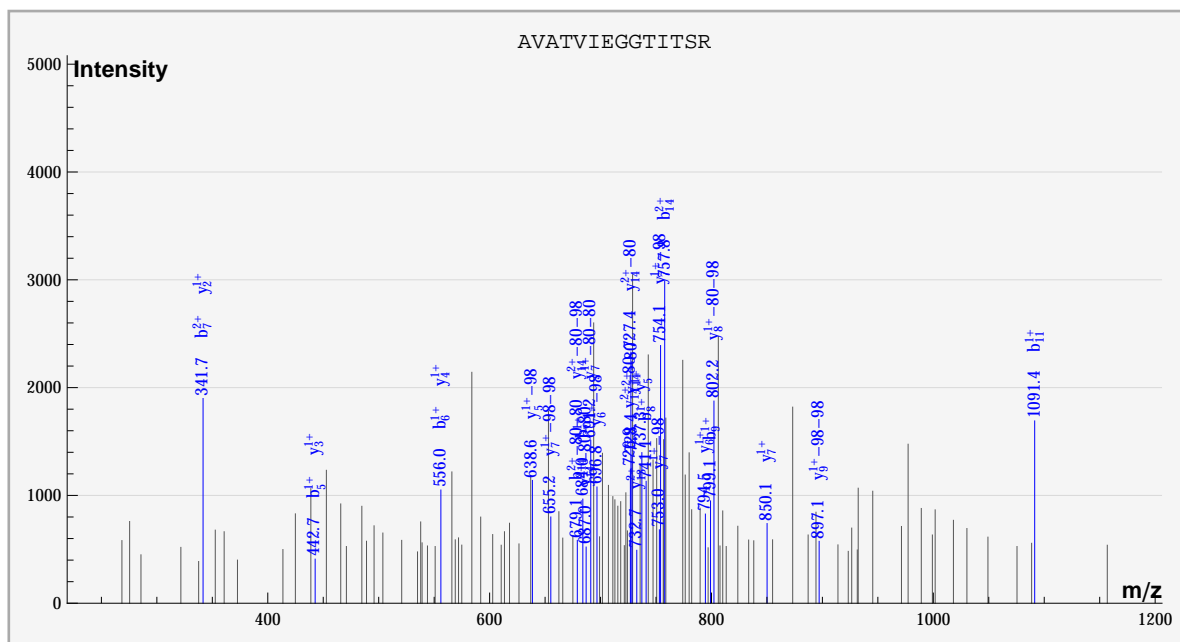

|   | #  | b | b* | #  | y | y* | P | P* |
|---|----|---|----|----|---|----|---|----|
| A | 1  |   |    |    |   |    |   | ✓  |
| V | 2  |   |    | 13 | ✓ |    |   |    |
| A | 3  |   |    | 12 |   |    |   |    |
| T | 4  |   |    | 11 |   |    |   |    |
| V | 5  | ✓ |    | 10 |   |    |   |    |
| I | 6  | ✓ |    | 9  |   | ✓  |   |    |
| E | 7  | ✓ |    | 8  |   | ✓  |   |    |
| G | 8  | ✓ |    | 7  | ✓ | ✓  |   |    |
| G | 9  | ✓ |    | 6  | ✓ | ✓  |   |    |
| T | 10 |   |    | 5  | ✓ | ✓  |   |    |
| I | 11 | ✓ |    | 4  | ✓ |    |   |    |
| T | 12 |   |    | 3  | ✓ |    |   |    |
| S | 13 |   |    | 2  | ✓ |    |   |    |
| R | 14 | ✓ | ✓  | 1  |   |    |   |    |

[ A [ V A T V ] [ I ] [ E ] [ G ] [ G ] [ T ] [ I ] [ T ] [ S R ]

dbValid true MRFSIGDVRKPK Oxidation\_M(1),PHOS(1) 2. 767. -1.61348 5.27307 100. ? 2520.  
 S\_Acido\_new%gil68566913|gb|AAY79842.1| MRFSIGDVRKPK%:Oxidation\_M::PHOS:::sample\_3%compd\_1081

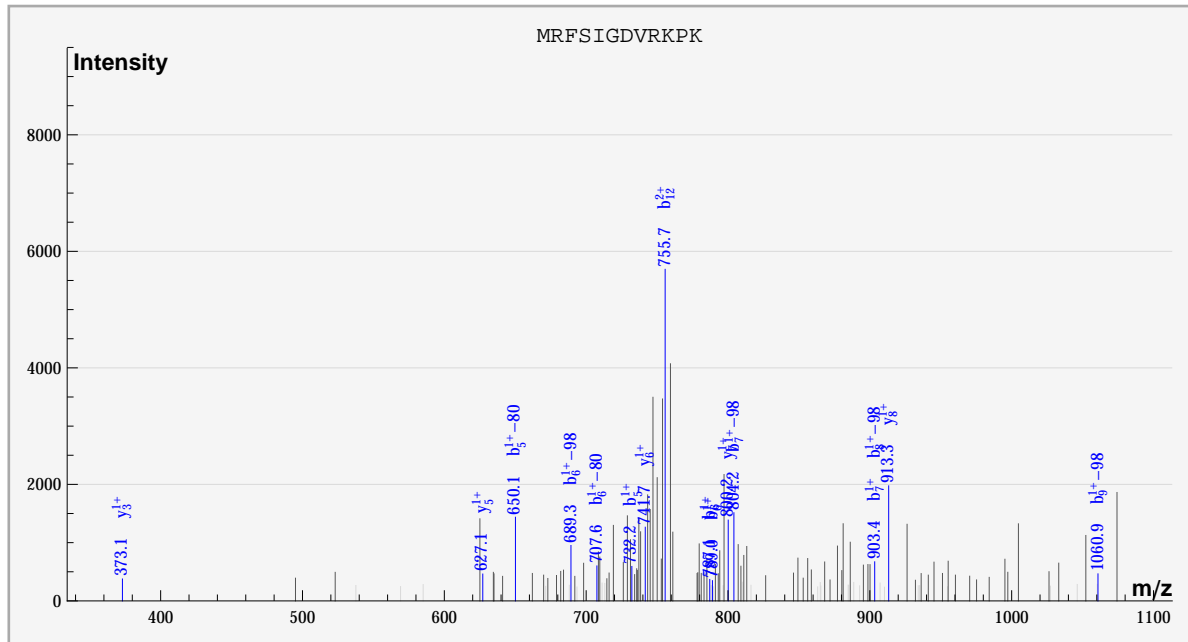

|   | #  | b | b* | #  | y | y* | P | P* |
|---|----|---|----|----|---|----|---|----|
| M | 1  |   |    |    |   |    |   |    |
| R | 2  |   |    | 11 |   |    |   |    |
| F | 3  |   |    | 10 |   |    |   |    |
| S | 4  |   |    | 9  |   |    |   |    |
| I | 5  | ✓ | ✓  | 8  | ✓ |    |   |    |
| G | 6  | ✓ | ✓  | 7  | ✓ |    |   |    |
| D | 7  | ✓ | ✓  | 6  | ✓ |    |   |    |
| V | 8  |   | ✓  | 5  | ✓ |    |   |    |
| R | 9  |   | ✓  | 4  |   |    |   |    |
| K | 10 |   |    | 3  | ✓ |    |   |    |
| P | 11 |   |    | 2  |   |    |   |    |
| K | 12 | ✓ |    | 1  |   |    |   |    |

M R F S I G D V R K P K

dbValid true TILVIK PHOS(1) 1. 768. -1.55262 5.96909 100. ? 2304.  
 S\_Acido\_new%gi|68566590|gb|AAY79519.1| TILVIK%:PHOS::::::%sample\_1%compd\_898

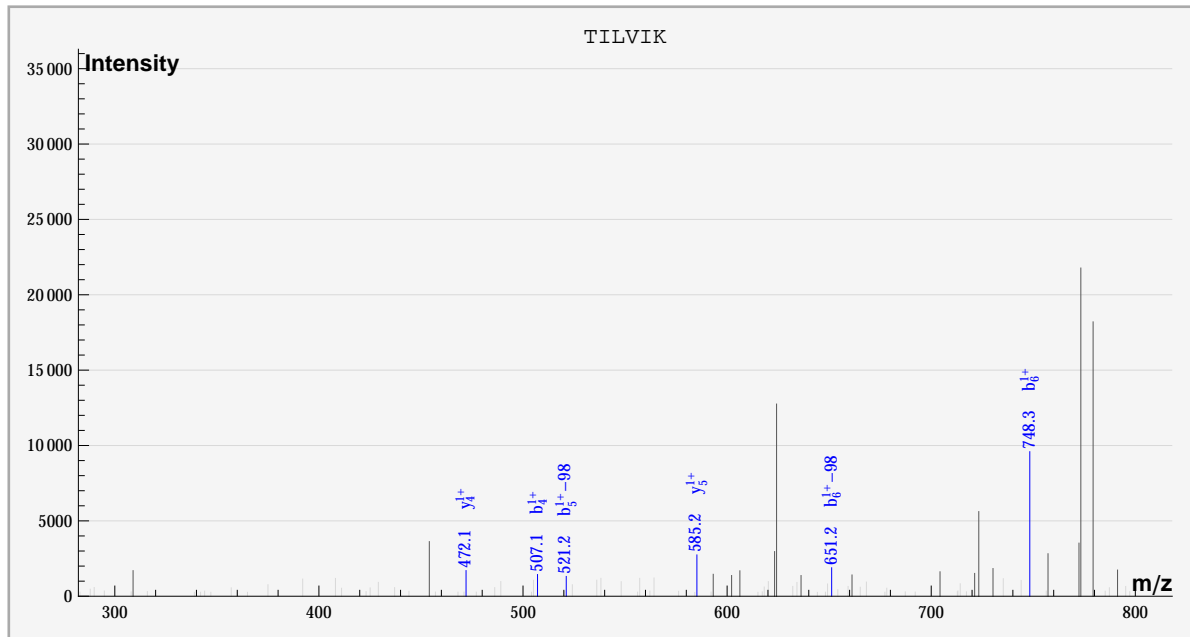

|   | # | b | b* | # | y | y* | P | P* |
|---|---|---|----|---|---|----|---|----|
| T | 1 |   |    |   |   |    |   |    |
| I | 2 |   |    | 5 | ✓ |    |   |    |
| L | 3 |   |    | 4 | ✓ |    |   |    |
| V | 4 | ✓ |    | 3 |   |    |   |    |
| I | 5 |   | ✓  | 2 |   |    |   |    |
| K | 6 | ✓ | ✓  | 1 |   |    |   |    |

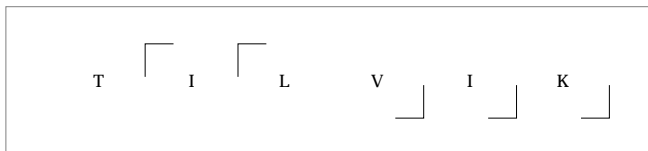

dbValid true LSNILK PHOS(1) 1. 768. -0.593745 5.14961 100. ? 2880.  
 S\_Acido\_new%gi|68567433|gb|AAY80362.1| LSNILK%::PHOS::::%sample\_2%compd\_1495

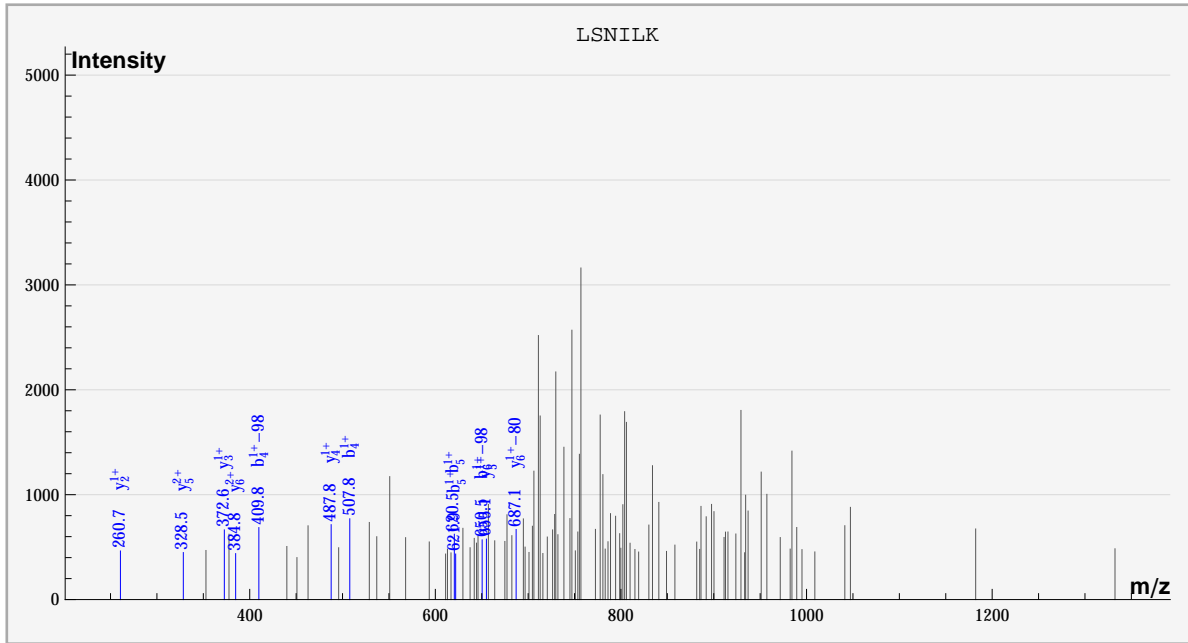

|   | # | b | b* | # | y | y* | P | P* |
|---|---|---|----|---|---|----|---|----|
| L | 1 |   |    |   |   |    | ✓ | ✓  |
| S | 2 |   |    | 5 | ✓ |    |   |    |
| N | 3 |   |    | 4 | ✓ |    |   |    |
| I | 4 | ✓ | ✓  | 3 | ✓ |    |   |    |
| L | 5 | ✓ |    | 2 | ✓ |    |   |    |
| K | 6 |   | ✓  | 1 |   |    |   |    |

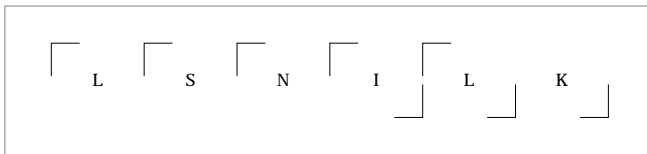

dbValid true LKYTEDSFLMK PHOS(2) 2. 768. -0.181378 5.09053 100. ? 4908.  
 S\_Acido\_new%gi|68568425|gb|AAy81354.1| LKYTEDSFLMK%:::PHOS:PHOS:.....%sample\_2%compd\_3346

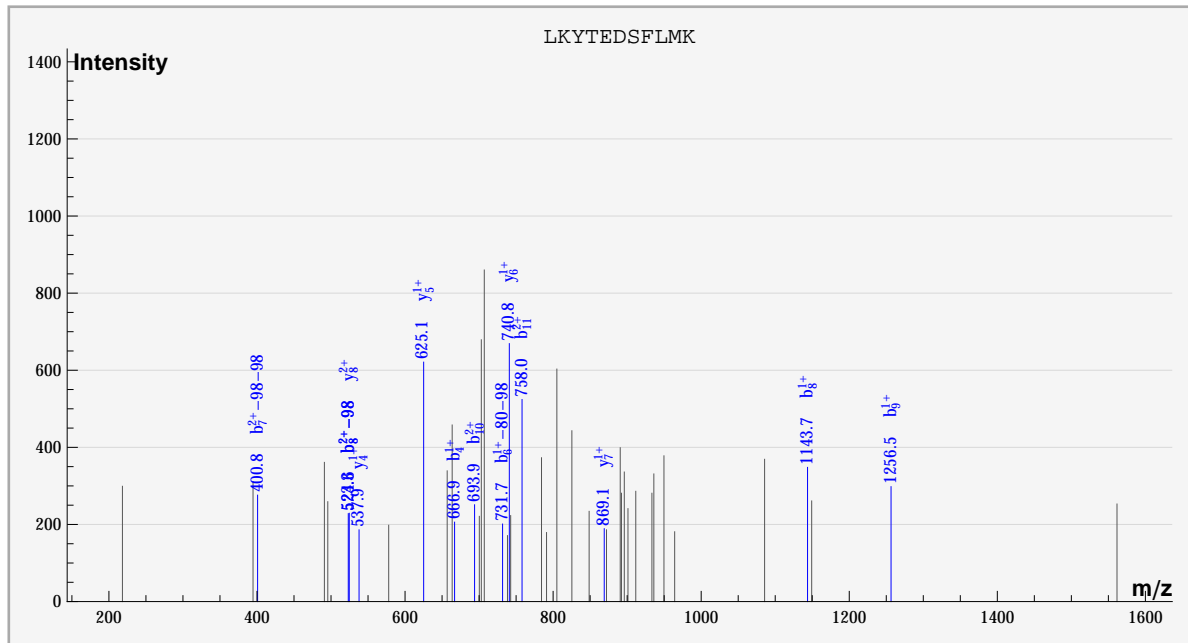

|   | #  | b | b* | #  | y | y* | P | P* |
|---|----|---|----|----|---|----|---|----|
| L | 1  |   |    |    |   |    |   |    |
| K | 2  |   |    | 10 |   |    |   |    |
| Y | 3  |   |    | 9  |   |    |   |    |
| T | 4  | ✓ |    | 8  | ✓ |    |   |    |
| E | 5  |   |    | 7  | ✓ |    |   |    |
| D | 6  |   | ✓  | 6  | ✓ |    |   |    |
| S | 7  |   | ✓  | 5  | ✓ |    |   |    |
| F | 8  | ✓ | ✓  | 4  | ✓ |    |   |    |
| L | 9  | ✓ |    | 3  |   |    |   |    |
| M | 10 | ✓ |    | 2  |   |    |   |    |
| K | 11 | ✓ |    | 1  |   |    |   |    |

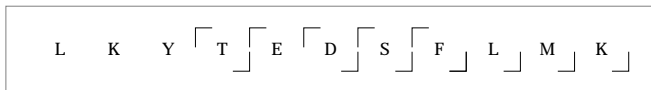

dbValid true FYGKIEGIRYK PHOS(2) 2. 769. -1.65127 5.0446 100. ? 4362.

S\_Acido\_new%gi|68568349|gb|AAy81278.1| FYGKIEGIRYK%::PHOS:::PHOS::%sample\_2%compd\_2850

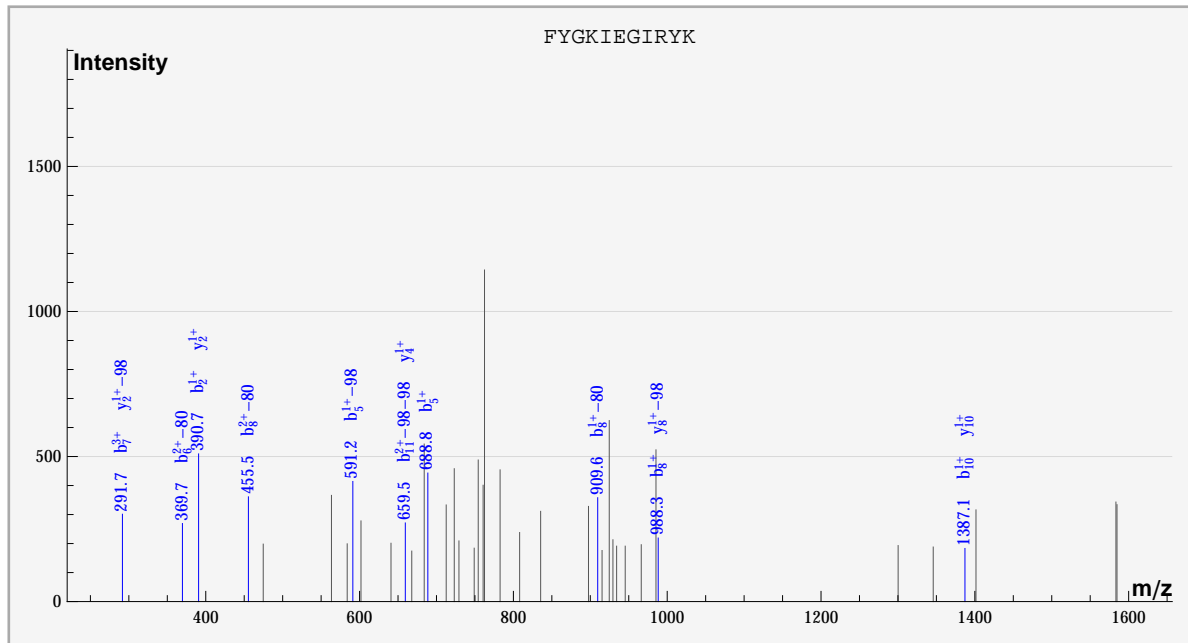

|   | #  | b | b* | #  | y | y* | P | P* |
|---|----|---|----|----|---|----|---|----|
| F | 1  |   |    |    |   |    |   |    |
| Y | 2  | ✓ |    | 10 | ✓ |    |   |    |
| G | 3  |   |    | 9  |   |    |   |    |
| K | 4  |   |    | 8  |   | ✓  |   |    |
| I | 5  | ✓ | ✓  | 7  |   |    |   |    |
| E | 6  |   | ✓  | 6  |   |    |   |    |
| G | 7  | ✓ |    | 5  |   |    |   |    |
| I | 8  | ✓ | ✓  | 4  | ✓ |    |   |    |
| R | 9  |   |    | 3  |   |    |   |    |
| Y | 10 | ✓ |    | 2  | ✓ | ✓  |   |    |
| K | 11 |   | ✓  | 1  |   |    |   |    |

F Y G K I E G I R Y K

dbValid true GIYIPK PHOS(1) 1. 769. 1.38479 5.53031 100. ? 582.  
 S\_Acido\_new%gi|68567741|gb|AAY80670.1| GIYIPK%:::PHOS:::%sample\_2%compd\_3825

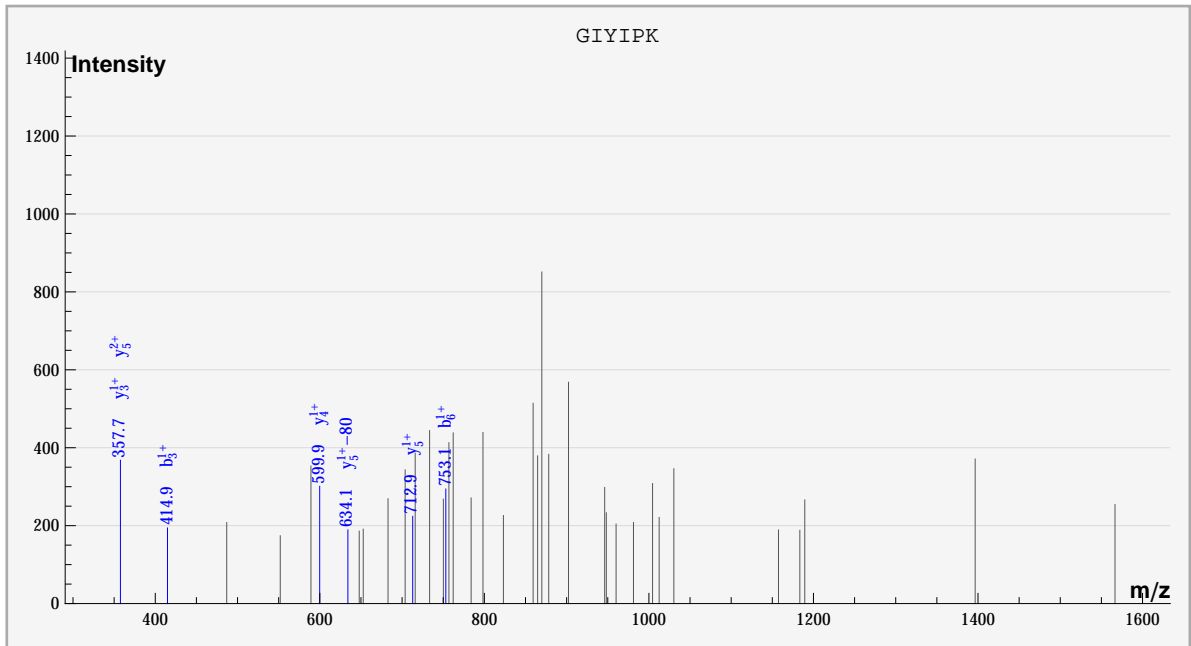

|   | # | b | b* | # | y | y* | P | P* |
|---|---|---|----|---|---|----|---|----|
| G | 1 |   |    |   |   |    |   |    |
| I | 2 |   |    | 5 | ✓ | ✓  |   |    |
| Y | 3 | ✓ |    | 4 | ✓ |    |   |    |
| I | 4 |   |    | 3 | ✓ |    |   |    |
| P | 5 |   |    | 2 |   |    |   |    |
| K | 6 | ✓ |    | 1 |   |    |   |    |

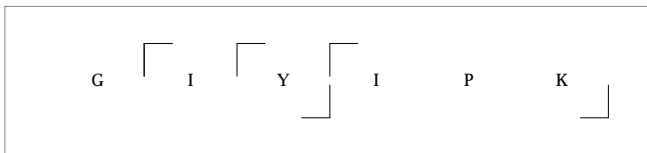



dbValid true LSDKVNNLVTD SR PHOS(1) 2. 771. -0.128038 5.01283 100. ? 2988.  
 S\_Acido\_new%gi|68567896|gb|AA80825.1| LSDKVNNLVTD SR%.....PHOS::%sample\_2%compd\_1601

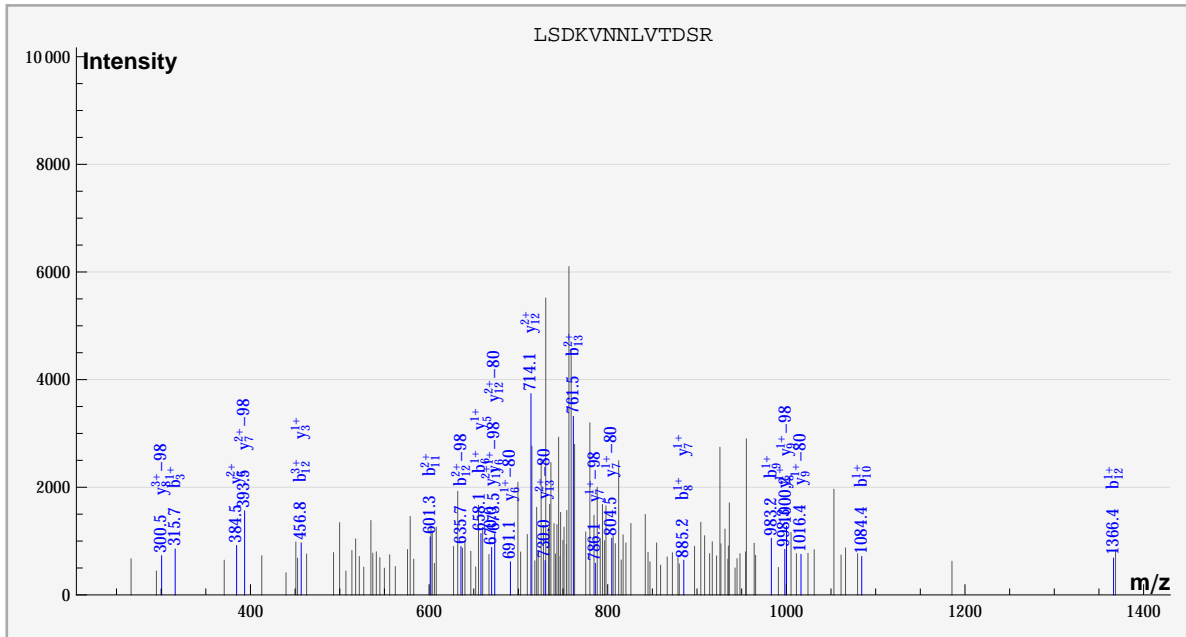

|   | #  | b | b* | #  | y | y* | P | P* |
|---|----|---|----|----|---|----|---|----|
| L | 1  |   |    |    |   |    |   | ✓  |
| S | 2  |   |    | 12 | ✓ | ✓  |   |    |
| D | 3  | ✓ |    | 11 | ✓ |    |   |    |
| K | 4  |   |    | 10 |   |    |   |    |
| V | 5  |   |    | 9  |   | ✓  |   |    |
| N | 6  | ✓ |    | 8  | ✓ | ✓  |   |    |
| N | 7  |   |    | 7  | ✓ | ✓  |   |    |
| L | 8  | ✓ |    | 6  | ✓ | ✓  |   |    |
| V | 9  | ✓ |    | 5  | ✓ |    |   |    |
| T | 10 | ✓ |    | 4  |   |    |   |    |
| D | 11 | ✓ |    | 3  | ✓ |    |   |    |
| S | 12 | ✓ | ✓  | 2  |   |    |   |    |
| R | 13 | ✓ |    | 1  |   |    |   |    |

[ L [ S [ D ] K [ V [ N ] N [ L [ V ] T ] D ] S ] R ]

dbValid true DNLSSR PHOS(1) 1. 772. -0.696745 5.22045 100. ? 2892.  
 S\_Acido\_new%gi|68566875|gb|AAY79804.1| DNLSSR%:::PHOS:::sample\_2%compd\_1513

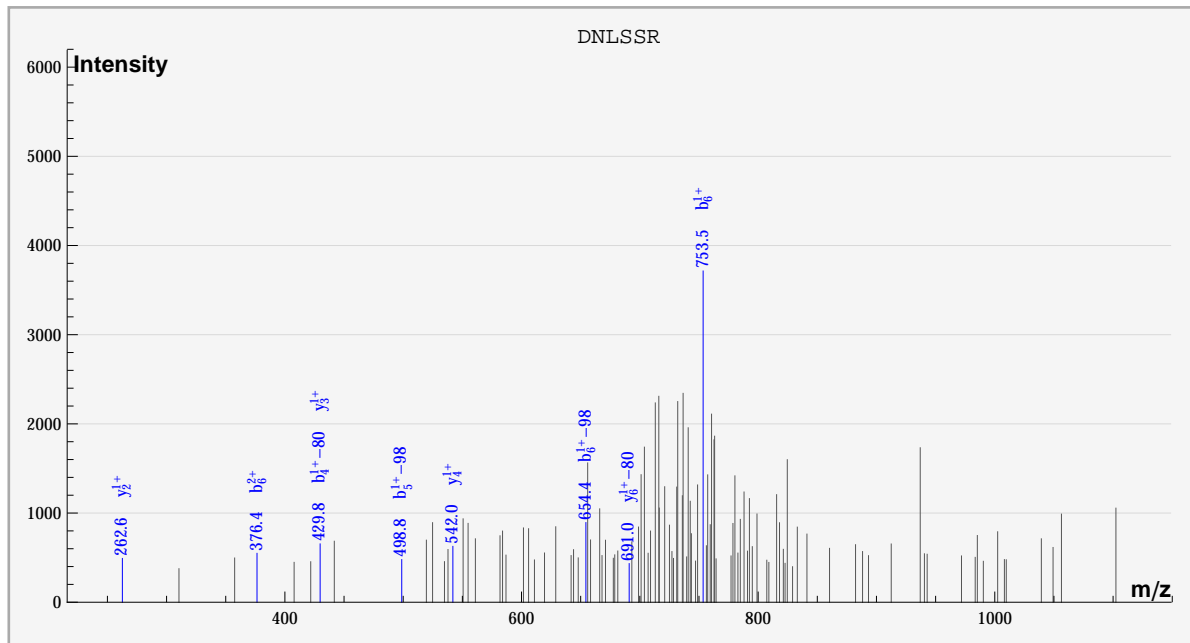

|   | # | b | b* | # | y | y* | P | P* |
|---|---|---|----|---|---|----|---|----|
| D | 1 |   |    |   |   |    |   | ✓  |
| N | 2 |   |    | 5 |   |    |   |    |
| L | 3 |   |    | 4 | ✓ |    |   |    |
| S | 4 | ✓ |    | 3 | ✓ |    |   |    |
| S | 5 |   | ✓  | 2 | ✓ |    |   |    |
| R | 6 | ✓ | ✓  | 1 |   |    |   |    |

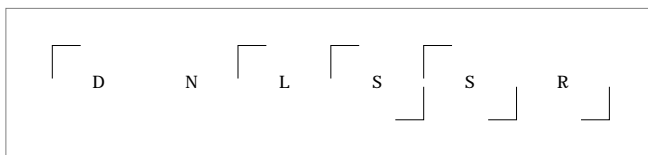

dbValid true TLNTDK PHOS(1) 1. 773. -1.6716 5.47464 100. ? 1728.  
 S\_Acido\_new%gi|68568546|gb|AAY81475.1| TLNTDK%:::PHOS:::sample\_2%compd\_450

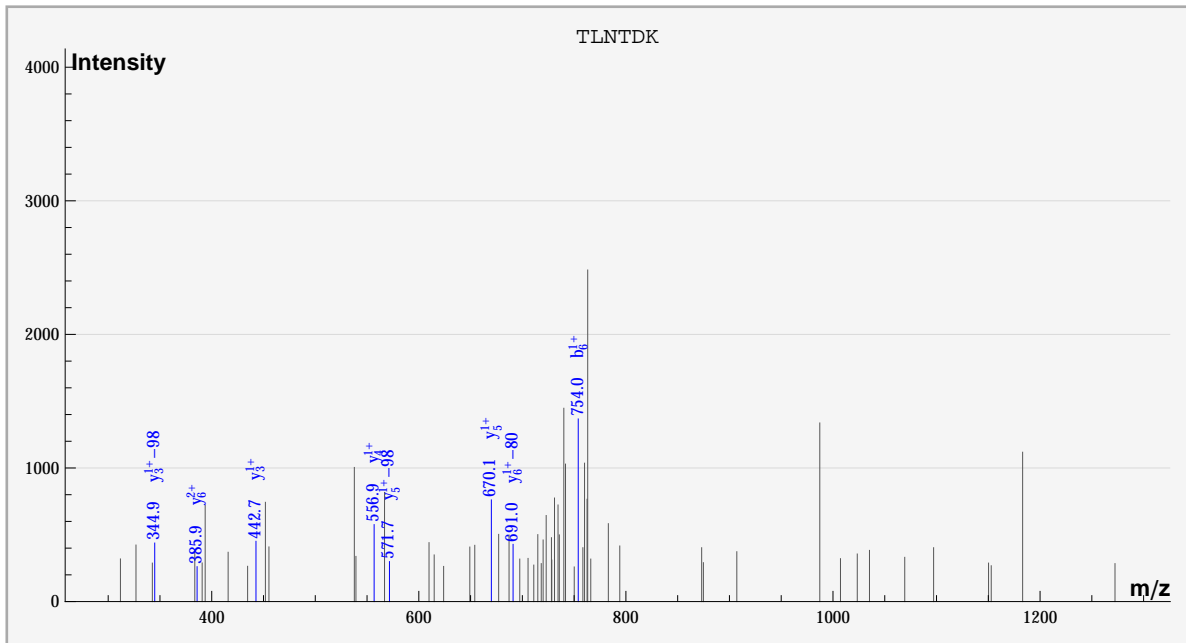

|   | # | b | b* | # | y | y* | P | P* |
|---|---|---|----|---|---|----|---|----|
| T | 1 |   |    |   |   |    | ✓ | ✓  |
| L | 2 |   |    | 5 | ✓ | ✓  |   |    |
| N | 3 |   |    | 4 | ✓ |    |   |    |
| T | 4 |   |    | 3 | ✓ | ✓  |   |    |
| D | 5 |   |    | 2 |   |    |   |    |
| K | 6 | ✓ |    | 1 |   |    |   |    |

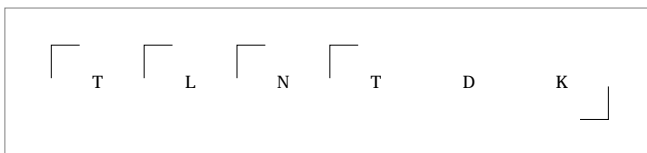

dbValid true FVIGTR PHOS(1) 1. 774. -1.62472 5.20109 100. ? 1890.  
 S\_Acido\_new%gi|68568488|gb|AAY81417.1| FVIGTR%::::PHOS::%sample\_2%cmpd\_563

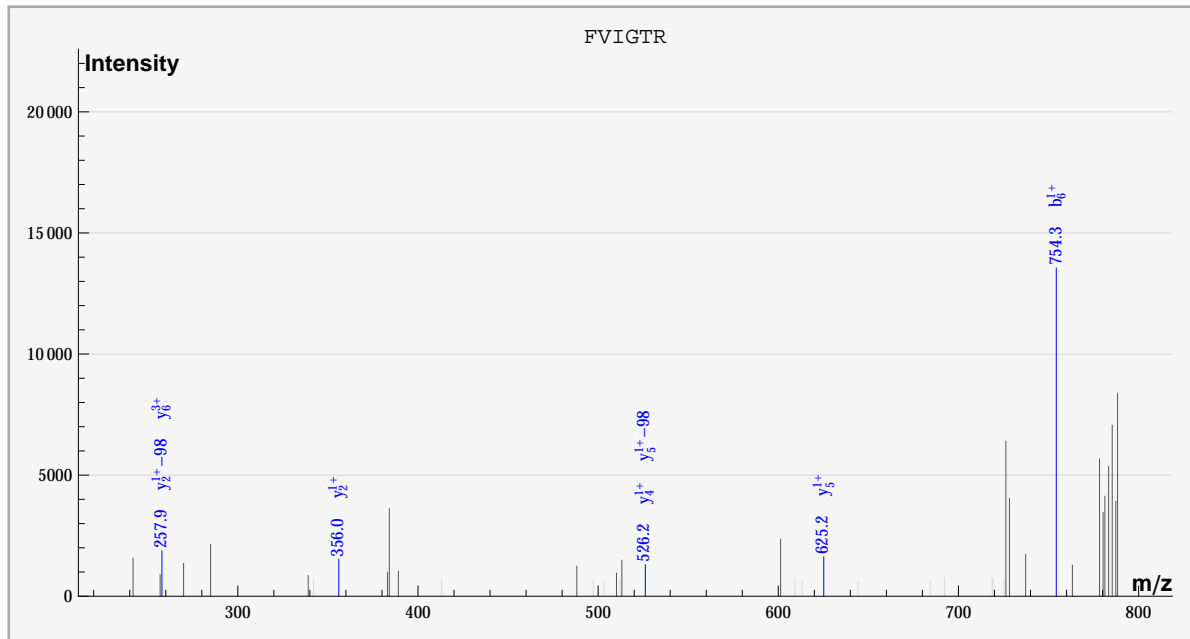

|   | # | b | b* | # | y | y* | P | P* |
|---|---|---|----|---|---|----|---|----|
| F | 1 |   |    |   |   |    | ✓ |    |
| V | 2 |   |    | 5 | ✓ | ✓  |   |    |
| I | 3 |   |    | 4 | ✓ |    |   |    |
| G | 4 |   |    | 3 |   |    |   |    |
| T | 5 |   |    | 2 | ✓ | ✓  |   |    |
| R | 6 | ✓ |    | 1 |   |    |   |    |

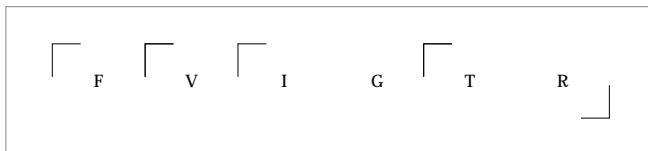

dbValid true YDWFSEMRKK PHOS(2) 2. 774. 1.30093 5.5429 100. ? 402.

S\_Acido\_new%gi|68568446|gb|AA81375.1| YDWFSEMRKK%:PHOS:::PHOS:::sample\_2%compd\_2486

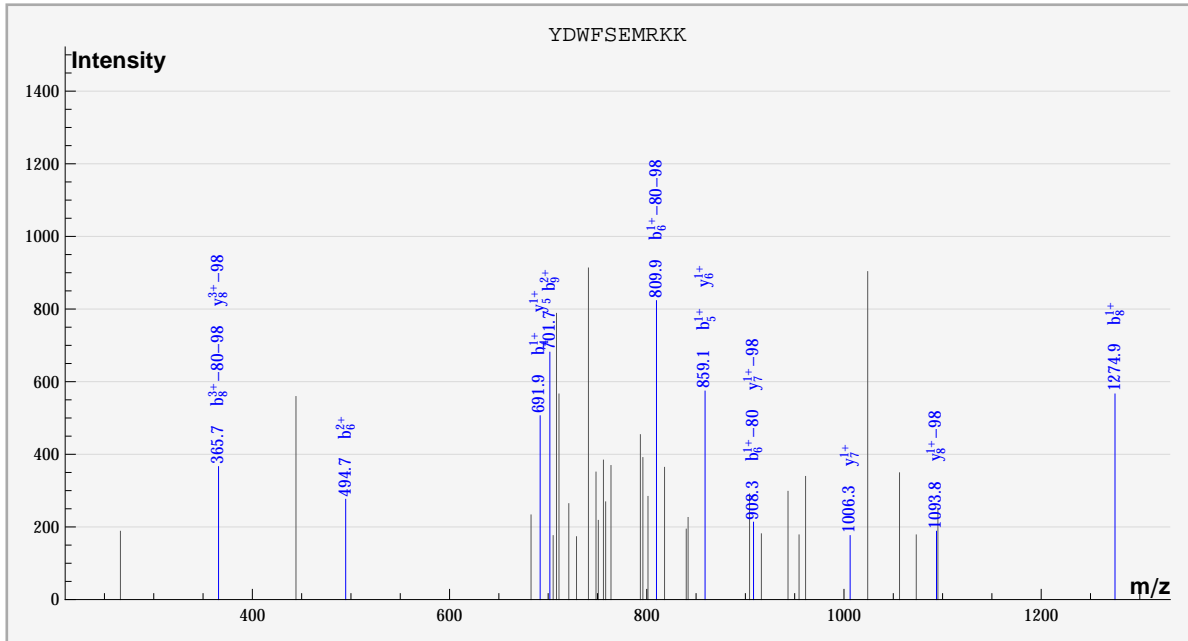

|   | #  | b | b* | # | y | y* | P | P* |
|---|----|---|----|---|---|----|---|----|
| Y | 1  |   |    |   |   |    |   |    |
| D | 2  |   |    | 9 |   |    |   |    |
| W | 3  |   |    | 8 |   | ✓  |   |    |
| F | 4  | ✓ |    | 7 | ✓ | ✓  |   |    |
| S | 5  | ✓ |    | 6 | ✓ |    |   |    |
| E | 6  | ✓ | ✓  | 5 | ✓ |    |   |    |
| M | 7  |   |    | 4 |   |    |   |    |
| R | 8  | ✓ | ✓  | 3 |   |    |   |    |
| K | 9  | ✓ |    | 2 |   |    |   |    |
| K | 10 |   |    | 1 |   |    |   |    |

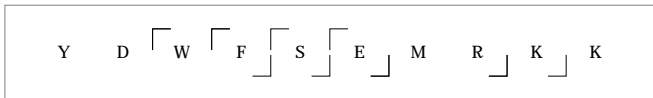

dbValid true KYNVDYEFYFTK PHOS(1) 2. 774. 1.33415 5.37505 100. ? 4470.  
 S\_Acido\_new%gii68567767|gb|AA80696.1| KYNVDYEFYFTK%:.....PHOS:::%sample\_2%compd\_2958

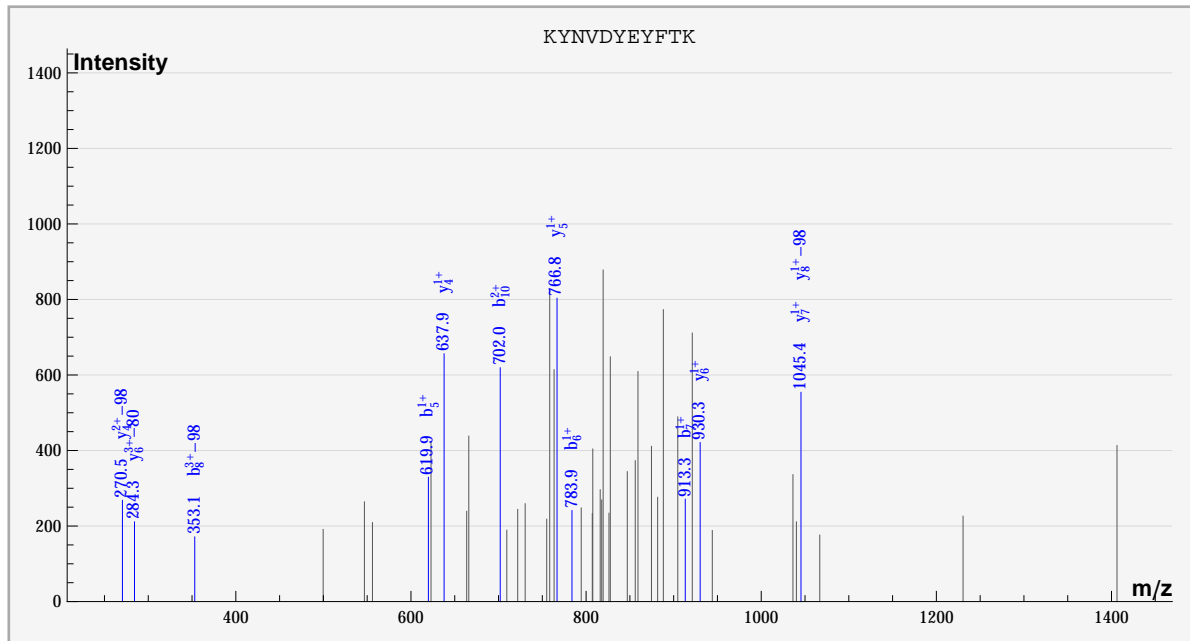

|   | #  | b | b* | #  | y | y* | P | P* |
|---|----|---|----|----|---|----|---|----|
| K | 1  |   |    |    |   |    |   |    |
| Y | 2  |   |    | 10 |   |    |   |    |
| N | 3  |   |    | 9  |   |    |   |    |
| V | 4  |   |    | 8  |   | ✓  |   |    |
| D | 5  | ✓ |    | 7  | ✓ | ✓  |   |    |
| Y | 6  | ✓ |    | 6  | ✓ | ✓  |   |    |
| E | 7  | ✓ |    | 5  | ✓ | ✓  |   |    |
| Y | 8  |   | ✓  | 4  | ✓ | ✓  |   |    |
| F | 9  |   |    | 3  |   |    |   |    |
| T | 10 | ✓ |    | 2  |   |    |   |    |
| K | 11 |   |    | 1  |   |    |   |    |

K Y N V D Y E Y F T K

dbValid true GVLDEY PHOS(1) 1. 775. 0.290945 6.64986 100. ? 1524.  
 S\_Acido\_new%gi|68567823|gb|AAY80752.1| GVLDEY%::::::PHOS:%sample\_2%compd\_264

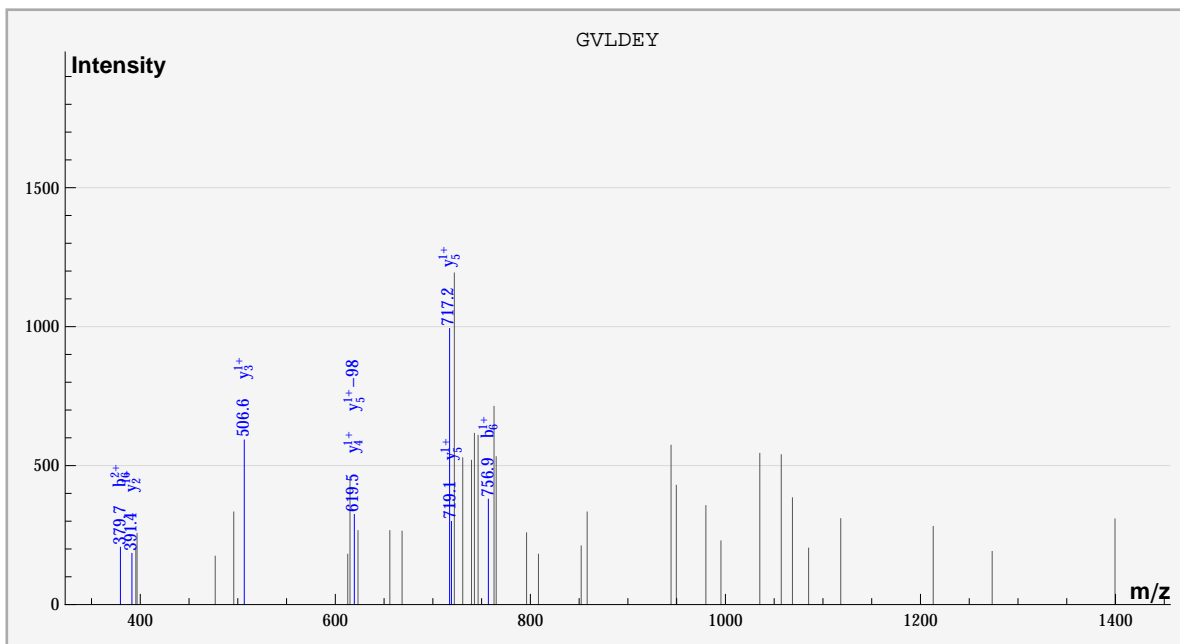

|   | # | b | b* | # | y | y* | P | P* |
|---|---|---|----|---|---|----|---|----|
| G | 1 |   |    |   |   |    |   |    |
| V | 2 |   |    | 5 | ✓ | ✓  |   |    |
| L | 3 |   |    | 4 | ✓ |    |   |    |
| D | 4 |   |    | 3 | ✓ |    |   |    |
| E | 5 |   |    | 2 | ✓ |    |   |    |
| Y | 6 | ✓ |    | 1 |   |    |   |    |

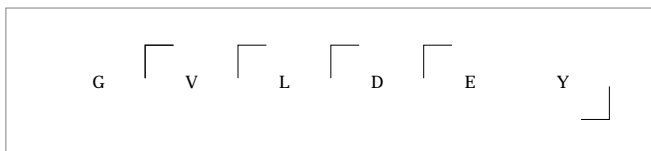

dbValid true EMTKVLNSTKR PHOS(3) 2. 775. -1.18953 5.54361 100. ? 1668.

S\_Acido\_new%gi|68568511|gb|AAY81440.1| EMTKVLNSTKR%:::PHOS:::PHOS:PHOS:::sample\_2%compd\_396

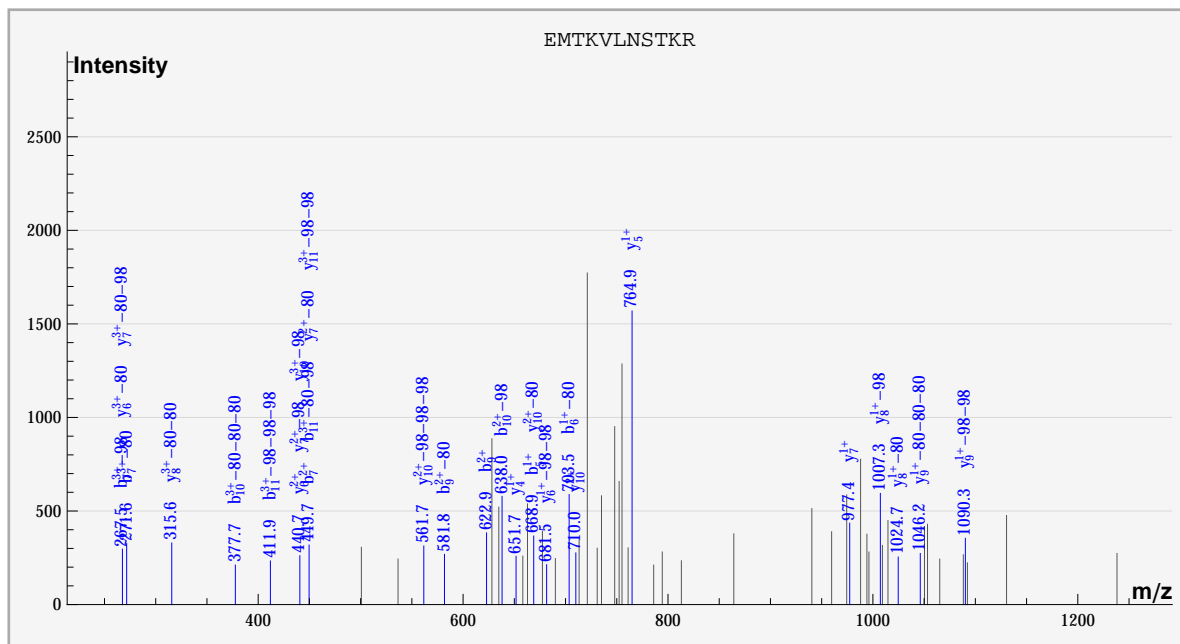

|   | #  | b | b* | #  | y | y* | P | P* |
|---|----|---|----|----|---|----|---|----|
| E | 1  |   |    |    |   |    |   | ✓  |
| M | 2  |   |    | 10 | ✓ | ✓  |   |    |
| T | 3  |   |    | 9  |   | ✓  |   |    |
| K | 4  |   |    | 8  |   | ✓  |   |    |
| V | 5  | ✓ |    | 7  | ✓ | ✓  |   |    |
| L | 6  |   | ✓  | 6  | ✓ | ✓  |   |    |
| N | 7  | ✓ | ✓  | 5  | ✓ |    |   |    |
| S | 8  |   |    | 4  | ✓ |    |   |    |
| T | 9  | ✓ | ✓  | 3  |   |    |   |    |
| K | 10 |   | ✓  | 2  |   |    |   |    |
| R | 11 |   | ✓  | 1  |   |    |   |    |

「 E 「 M 「 T 「 K 「 V 「 L 「 N 「 S T 「 K 「 R 」



dbValid true KRGLSLVTDGNTK PHOS(2) 2. 775. -0.137263 5.68998 100. ? 2760.  
 S\_Acido\_new%gi|68566826|gb|AA79755.1| KRGLSLVTDGNTK%:::PHOS:::PHOS::%sample\_2%cmpd\_1394

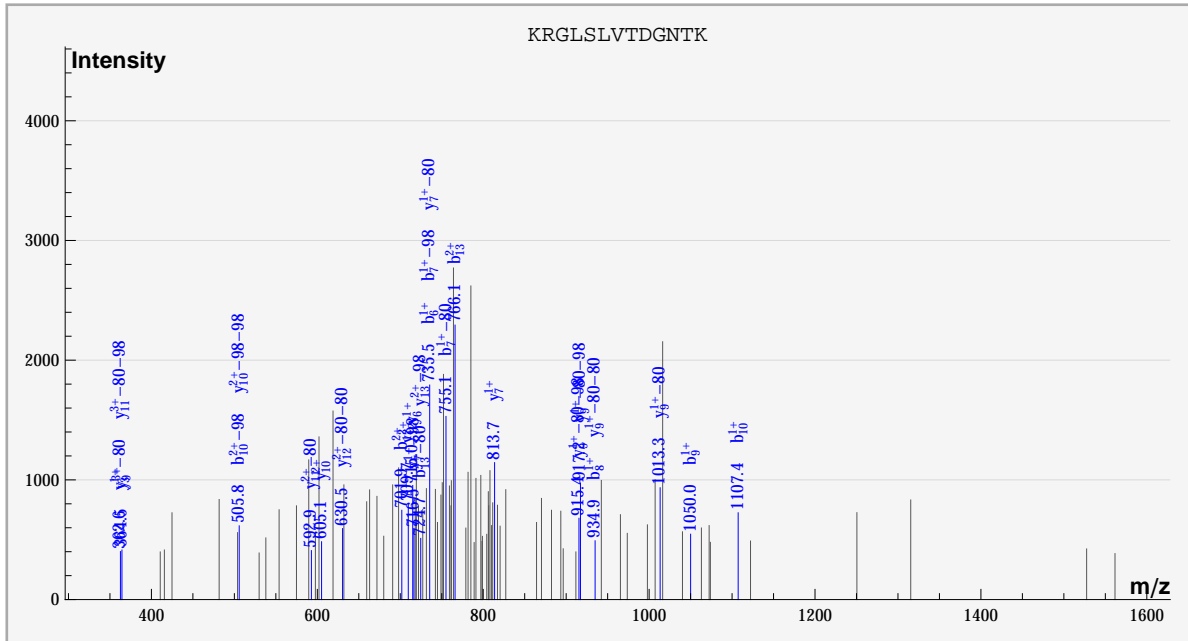

|   | #  | b | b* | #  | y | y* | P | P* |
|---|----|---|----|----|---|----|---|----|
| K | 1  |   |    |    |   |    |   | ✓  |
| R | 2  |   |    | 12 | ✓ | ✓  |   |    |
| G | 3  |   |    | 11 |   | ✓  |   |    |
| L | 4  |   |    | 10 | ✓ | ✓  |   |    |
| S | 5  |   |    | 9  | ✓ | ✓  |   |    |
| L | 6  | ✓ |    | 8  |   |    |   |    |
| V | 7  |   | ✓  | 7  | ✓ | ✓  |   |    |
| T | 8  | ✓ |    | 6  | ✓ |    |   |    |
| D | 9  | ✓ |    | 5  |   |    |   |    |
| G | 10 | ✓ | ✓  | 4  |   |    |   |    |
| N | 11 |   |    | 3  |   | ✓  |   |    |
| T | 12 | ✓ |    | 2  |   |    |   |    |
| K | 13 | ✓ | ✓  | 1  |   |    |   |    |

「 K 」 「 R 」 「 G 」 「 L 」 「 S 」 「 L 」 「 V 」 「 T 」 「 D 」 「 G 」 「 N 」 「 T 」 「 K 」

dbValid true LTKARIAAFGSTR PHOS(2) 2. 775. 1.37581 5.65858 100. ? 3516.  
 S\_Acido\_new%gi|68568681|gb|AAY81610.1| LTKARIAAFGSTR%:.....PHOS:PHOS::%sample\_2%cmpd\_1966

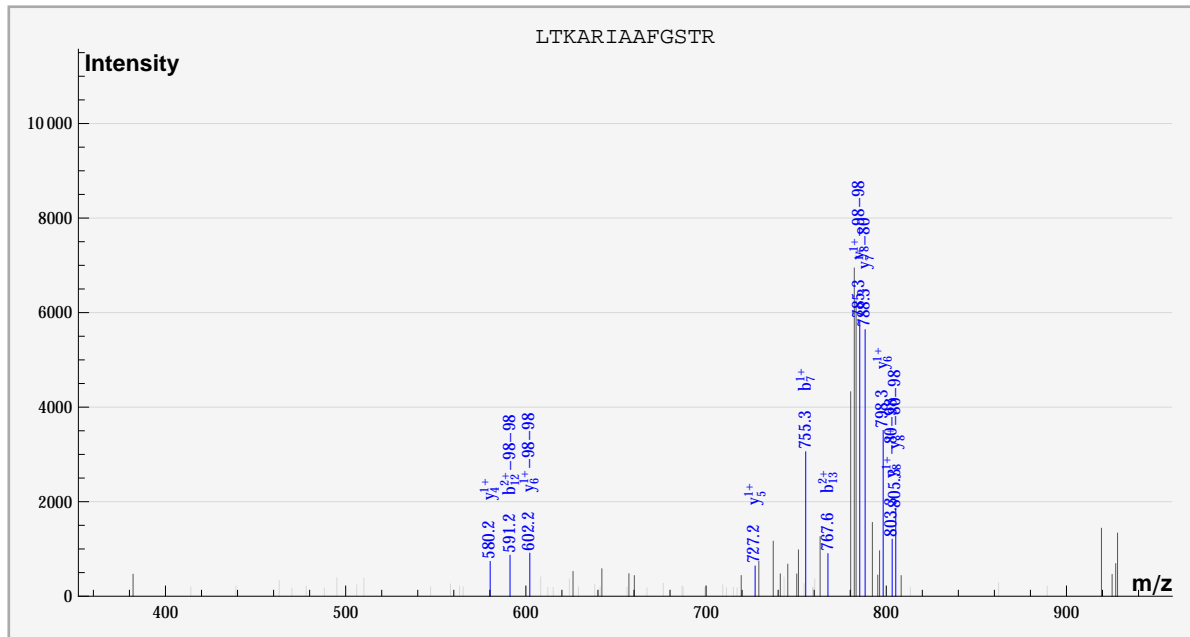

|   | #  | b | b* | #  | y | y* | P | P* |
|---|----|---|----|----|---|----|---|----|
| L | 1  |   |    |    |   |    |   |    |
| T | 2  |   |    | 12 |   |    |   |    |
| K | 3  |   |    | 11 |   |    |   |    |
| A | 4  |   |    | 10 |   |    |   |    |
| R | 5  |   |    | 9  |   |    |   |    |
| I | 6  |   |    | 8  |   | ✓  |   |    |
| A | 7  | ✓ |    | 7  |   | ✓  |   |    |
| A | 8  |   |    | 6  | ✓ | ✓  |   |    |
| F | 9  |   |    | 5  | ✓ |    |   |    |
| G | 10 |   |    | 4  | ✓ |    |   |    |
| S | 11 |   |    | 3  |   |    |   |    |
| T | 12 |   | ✓  | 2  |   |    |   |    |
| R | 13 | ✓ |    | 1  |   |    |   |    |

L T K A R I A A F G S T R

dbValid true VVFSQISAESSYR PHOS(1) 2. 775. 1.85578 5.52252 100. ? 3888.  
 S\_Acido\_new%gi|68568383|gb|AA81312.1| VVFSQISAESSYR%:::PHOS:::sample\_2%compd\_2426

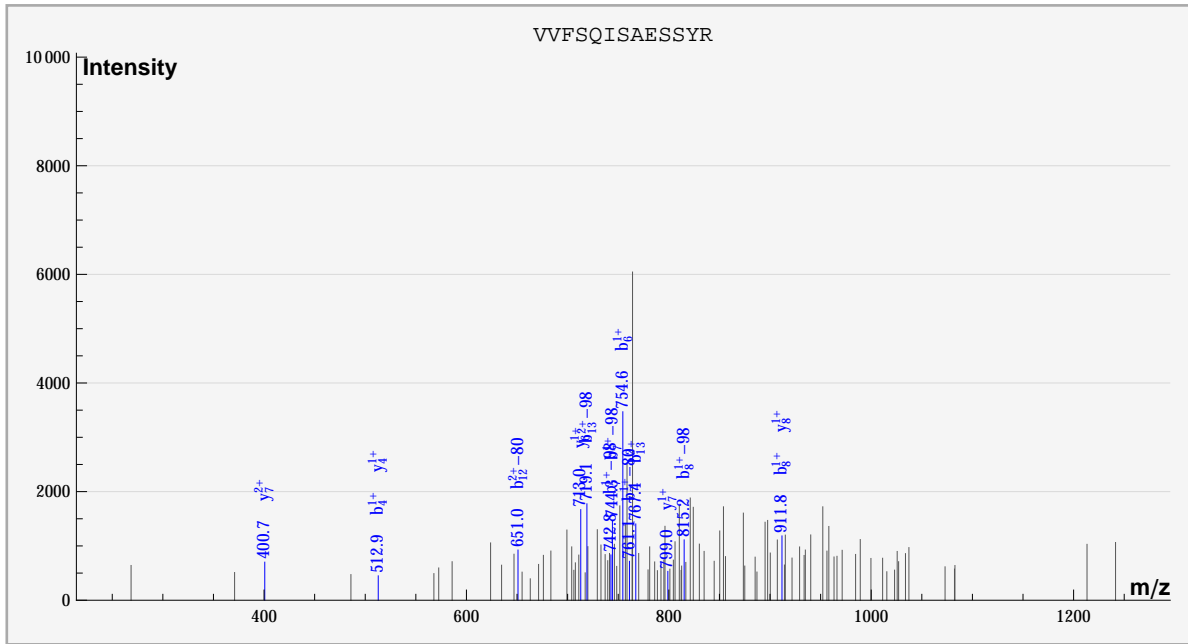

|   | #  | b | b* | #  | y | y* | P | P* |
|---|----|---|----|----|---|----|---|----|
| V | 1  |   |    |    |   |    |   |    |
| V | 2  |   |    | 12 |   |    |   |    |
| F | 3  |   |    | 11 |   |    |   |    |
| S | 4  | ✓ |    | 10 |   |    |   |    |
| Q | 5  |   |    | 9  |   |    |   |    |
| I | 6  | ✓ |    | 8  | ✓ |    |   |    |
| S | 7  |   | ✓  | 7  | ✓ |    |   |    |
| A | 8  | ✓ | ✓  | 6  | ✓ |    |   |    |
| E | 9  |   |    | 5  |   |    |   |    |
| S | 10 |   |    | 4  | ✓ |    |   |    |
| S | 11 |   |    | 3  |   |    |   |    |
| Y | 12 |   | ✓  | 2  |   |    |   |    |
| R | 13 | ✓ | ✓  | 1  |   |    |   |    |

V V F S Q I S A E S S Y R

dbValid true RIYMKPIEISK Oxidation\_M(1),PHOS(2) 2. 776. 1.36352 5.19153 100. ? 1542.  
 S\_Acido\_new%gil68566754|gb|AAY79683.1| RIYMKPIEISK%:::PHOS:Oxidation\_M:::::PHOS::%sample\_2%cmpd\_264

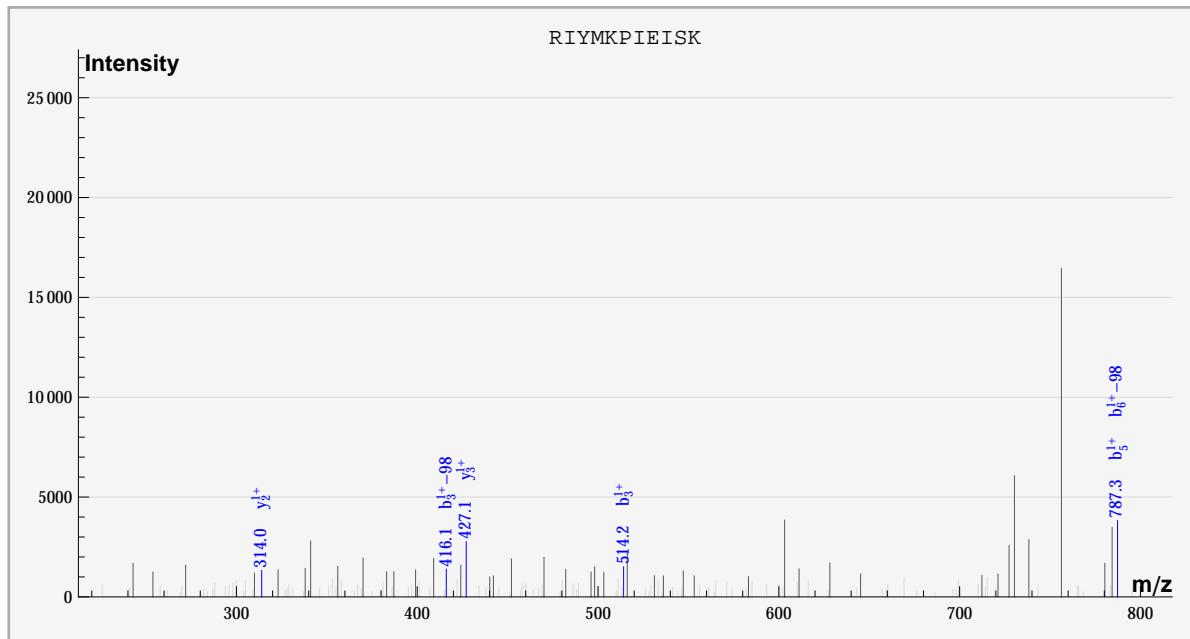

|   | #  | b | b* | #  | y | y* | P | P* |
|---|----|---|----|----|---|----|---|----|
| R | 1  |   |    |    |   |    |   |    |
| I | 2  |   |    | 10 |   |    |   |    |
| Y | 3  | ✓ | ✓  | 9  |   |    |   |    |
| M | 4  |   |    | 8  |   |    |   |    |
| K | 5  | ✓ |    | 7  |   |    |   |    |
| P | 6  |   | ✓  | 6  |   |    |   |    |
| I | 7  |   |    | 5  |   |    |   |    |
| E | 8  |   |    | 4  |   |    |   |    |
| I | 9  |   |    | 3  | ✓ |    |   |    |
| S | 10 |   |    | 2  | ✓ |    |   |    |
| K | 11 |   |    | 1  |   |    |   |    |

RIYMKPIEISK

dbValid true IKDLSILHVNSTK PHOS(1) 2. 776. -1.58674 5.01588 100. ? 2418.  
 S\_Acido\_new%gi|68568204|gb|AAY81133.1| IKDLSILHVNSTK%:.....PHOS::%sample\_2%cmpd\_1018

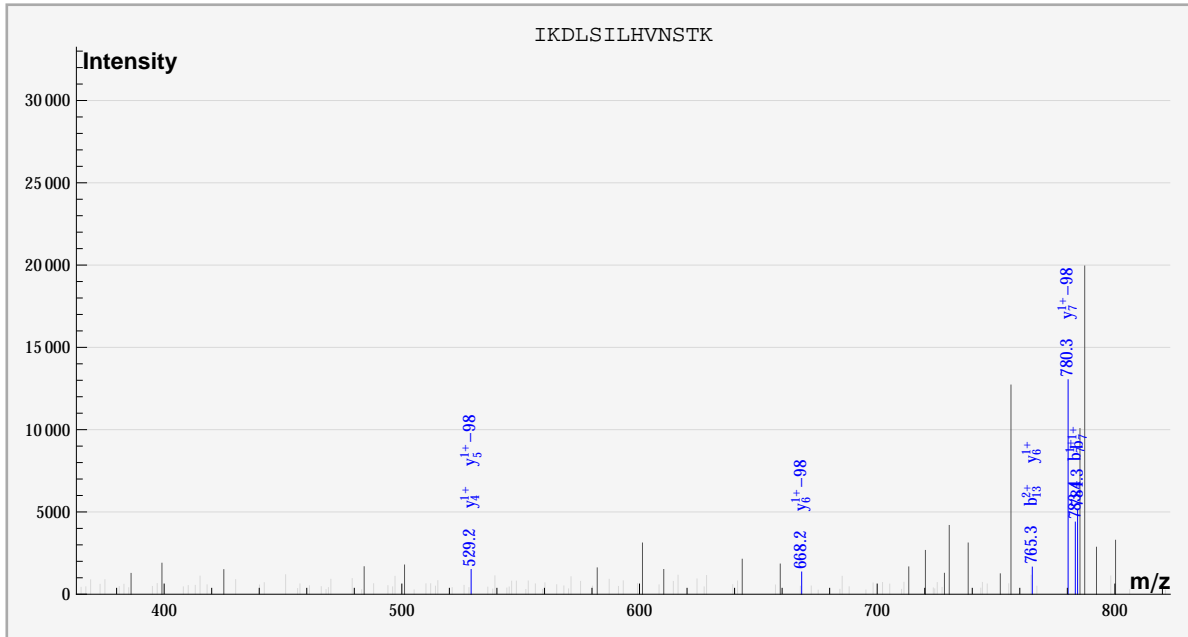

|   | #  | b | b* | #  | y | y* | P | P* |
|---|----|---|----|----|---|----|---|----|
| I | 1  |   |    |    |   |    |   |    |
| K | 2  |   |    | 12 |   |    |   |    |
| D | 3  |   |    | 11 |   |    |   |    |
| L | 4  |   |    | 10 |   |    |   |    |
| S | 5  |   |    | 9  |   |    |   |    |
| I | 6  |   |    | 8  |   |    |   |    |
| L | 7  | ✓ |    | 7  |   | ✓  |   |    |
| H | 8  |   |    | 6  | ✓ | ✓  |   |    |
| V | 9  |   |    | 5  |   | ✓  |   |    |
| N | 10 |   |    | 4  | ✓ |    |   |    |
| S | 11 |   |    | 3  |   |    |   |    |
| T | 12 |   |    | 2  |   |    |   |    |
| K | 13 | ✓ |    | 1  |   |    |   |    |

I K D L S I [ L ] [ H ] [ V ] [ N ] S T K [ ]

dbValid true MTSDLK PHOS(1) 1. 776. -1.68969 5.05379 100. ? 3036.

S\_Acido\_new%gi68567355|gb|AAY80284.1| MTSDLK%:::PHOS:::sample\_2%compd\_1554

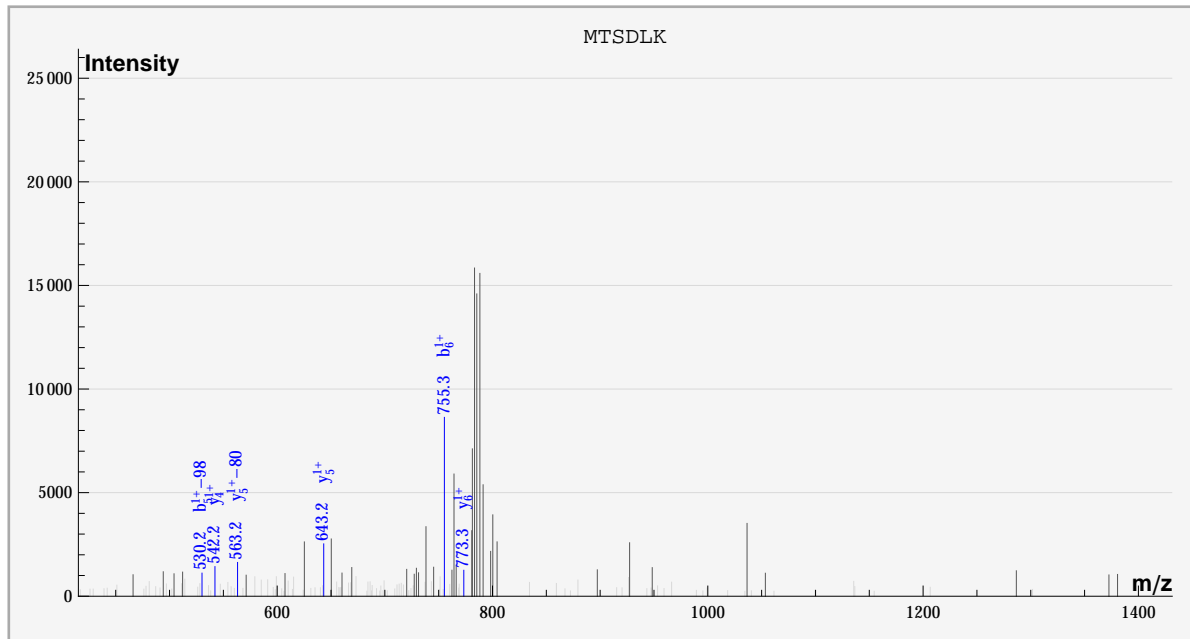

|   | # | b | b* | # | y | y* | P | P* |
|---|---|---|----|---|---|----|---|----|
| M | 1 |   |    |   |   |    |   | ✓  |
| T | 2 |   |    | 5 | ✓ | ✓  |   |    |
| S | 3 |   |    | 4 | ✓ |    |   |    |
| D | 4 |   |    | 3 |   |    |   |    |
| L | 5 |   | ✓  | 2 |   |    |   |    |
| K | 6 | ✓ |    | 1 |   |    |   |    |

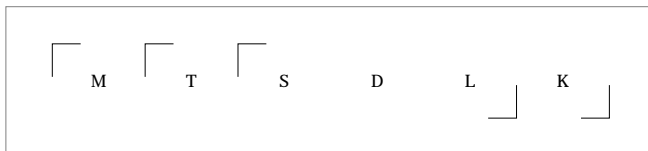

dbValid true YHIIPDLFLTR PHOS(2) 2. 776. -1.64344 5.08263 100. ? 3144.  
 S\_Acido\_new%gil68567709|gb|AAy80638.1| YHIIPDLFLTR%:PHOS:::PHOS::%sample\_2%compd\_1647

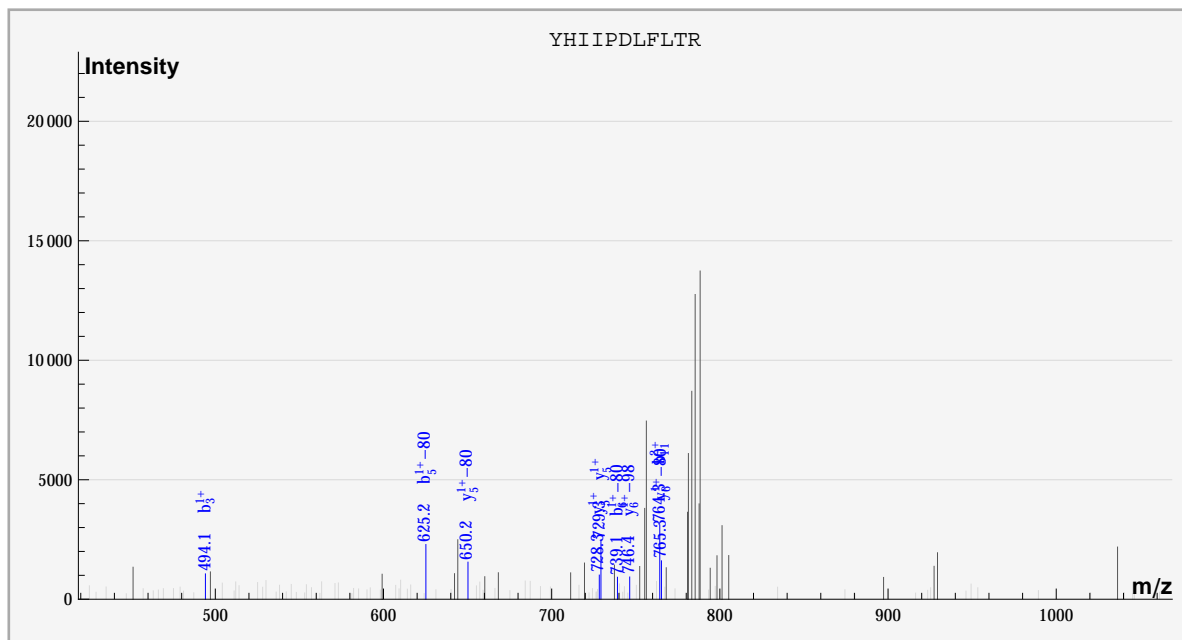

|   | #  | b | b* | #  | y | y* | P | P* |
|---|----|---|----|----|---|----|---|----|
| Y | 1  |   |    |    |   |    |   |    |
| H | 2  |   |    | 10 |   |    |   |    |
| I | 3  | ✓ |    | 9  |   |    |   |    |
| I | 4  |   |    | 8  |   |    |   |    |
| P | 5  |   | ✓  | 7  |   |    |   |    |
| D | 6  |   | ✓  | 6  |   | ✓  |   |    |
| L | 7  |   |    | 5  | ✓ | ✓  |   |    |
| F | 8  |   |    | 4  |   |    |   |    |
| L | 9  |   |    | 3  |   |    |   |    |
| T | 10 |   |    | 2  |   |    |   |    |
| R | 11 | ✓ |    | 1  |   |    |   |    |

Y H I I P D L F L T R

dbValid true YHIIPDLFLTR PHOS(2) 2. 776. -1.64344 5.30206 100. ? 3156.  
 S\_Acido\_new%gi|68567709|gb|AA80638.1| YHIIPDLFLTR%:PHOS:::PHOS::%sample\_2%cmpd\_1657

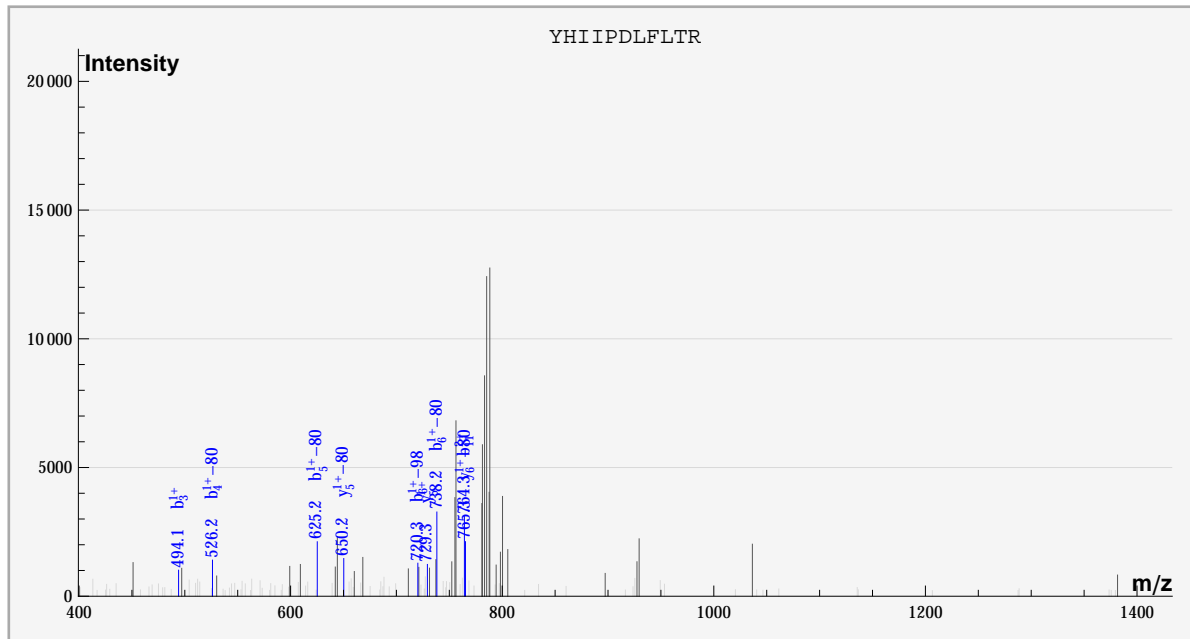

|   | #  | b | b* | #  | y | y* | P | P* |
|---|----|---|----|----|---|----|---|----|
| Y | 1  |   |    |    |   |    |   |    |
| H | 2  |   |    | 10 |   |    |   |    |
| I | 3  | ✓ |    | 9  |   |    |   |    |
| I | 4  |   | ✓  | 8  |   |    |   |    |
| P | 5  |   | ✓  | 7  |   |    |   |    |
| D | 6  |   | ✓  | 6  |   | ✓  |   |    |
| L | 7  |   |    | 5  | ✓ | ✓  |   |    |
| F | 8  |   |    | 4  |   |    |   |    |
| L | 9  |   |    | 3  |   |    |   |    |
| T | 10 |   |    | 2  |   |    |   |    |
| R | 11 | ✓ |    | 1  |   |    |   |    |

Y H I I P D L F L T R



dbValid true KRGLSLVTDGNTK PHOS(2) 2. 776. -1.13726 5.0766 100. ? 3270.

S\_Acido\_new%gi|68566826|gb|AA79755.1| KRGLSLVTDGNTK%:::PHOS:::PHOS::%sample\_2%cmpd\_1861

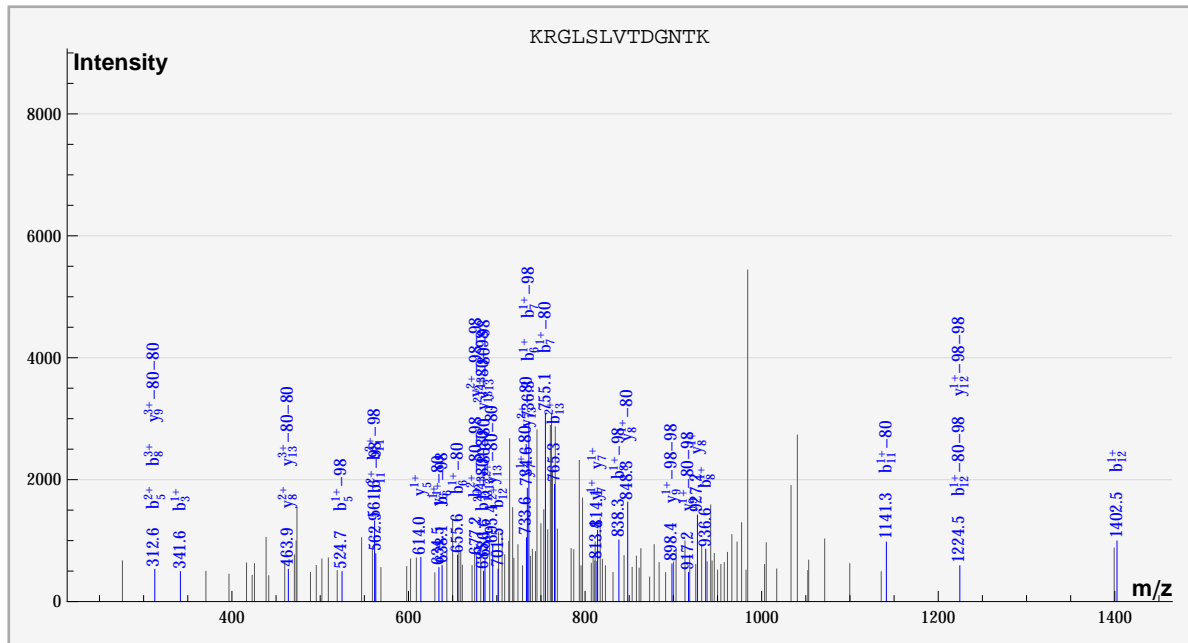

|   | #  | b | b* | #  | y | y* | P | P* |
|---|----|---|----|----|---|----|---|----|
| K | 1  |   |    |    |   |    |   | ✓  |
| R | 2  |   |    | 12 |   | ✓  |   |    |
| G | 3  | ✓ |    | 11 |   |    |   |    |
| L | 4  |   |    | 10 |   |    |   |    |
| S | 5  | ✓ | ✓  | 9  |   | ✓  |   |    |
| L | 6  | ✓ | ✓  | 8  | ✓ | ✓  |   |    |
| V | 7  |   | ✓  | 7  | ✓ | ✓  |   |    |
| T | 8  | ✓ | ✓  | 6  |   | ✓  |   |    |
| D | 9  |   |    | 5  | ✓ |    |   |    |
| G | 10 |   |    | 4  |   |    |   |    |
| N | 11 |   | ✓  | 3  |   |    |   |    |
| T | 12 | ✓ | ✓  | 2  |   |    |   |    |
| K | 13 | ✓ | ✓  | 1  |   |    |   |    |

[K][R][G][L][S][L][V][T][D][G][N][T][K]

dbValid true EFNLTMVIDYQT PHOS(1) 2. 777. 0.333297 5.01539 100. ? 2544.  
 S\_Acido\_new%gi|68566893|gb|AA79822.1| EFNLTMVIDYQT%:.....PHOS:%sample\_2%cmpd\_1196

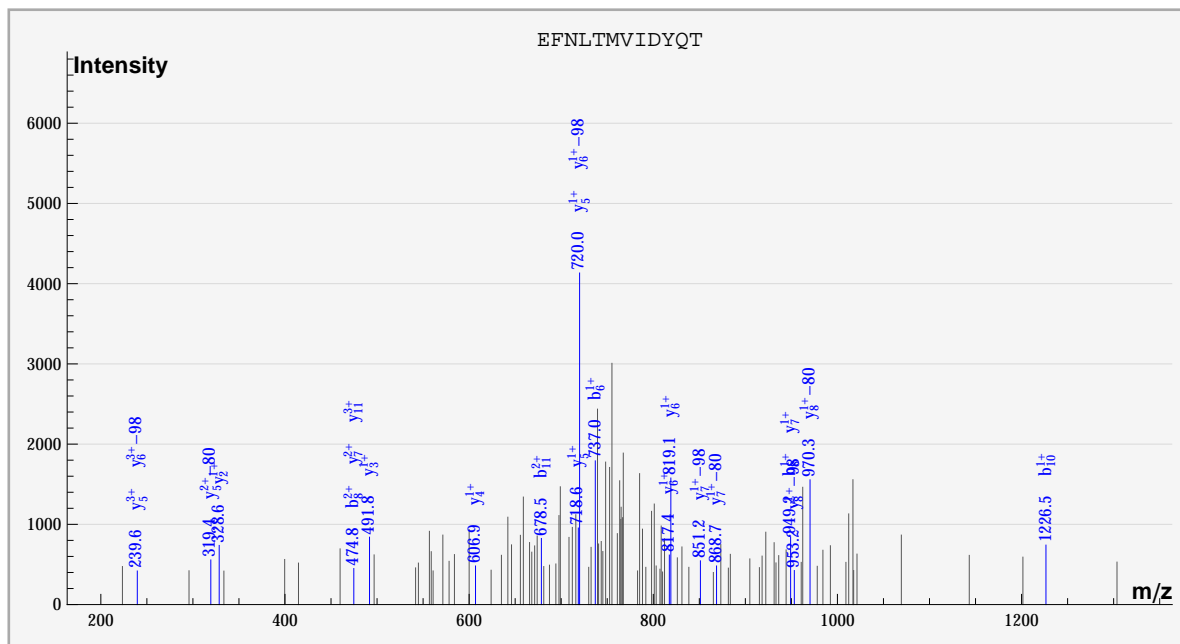

|   | #  | b | b* | #  | y | y* | P | P* |
|---|----|---|----|----|---|----|---|----|
| E | 1  |   |    |    |   |    |   |    |
| F | 2  |   |    | 11 | ✓ |    |   |    |
| N | 3  |   |    | 10 |   |    |   |    |
| L | 4  |   |    | 9  |   |    |   |    |
| T | 5  |   |    | 8  |   | ✓  |   |    |
| M | 6  | ✓ |    | 7  | ✓ | ✓  |   |    |
| V | 7  |   |    | 6  | ✓ | ✓  |   |    |
| I | 8  | ✓ |    | 5  | ✓ | ✓  |   |    |
| D | 9  |   |    | 4  | ✓ |    |   |    |
| Y | 10 | ✓ |    | 3  | ✓ |    |   |    |
| Q | 11 | ✓ |    | 2  | ✓ |    |   |    |
| T | 12 |   |    | 1  |   |    |   |    |

E [ F N L [ T [ M [ V [ I ] D [ Y ] Q ] T

dbValid true EGKYTGTEIIEER PHOS(2) 2. 777. 1.32565 5.46086 100. ? 3024.  
 S\_Acido\_new%gi|68568391|gb|AA81320.1| EGKYTGTEIIEER%::::PHOS:PHOS:.....:sample\_2%cmpd\_1545

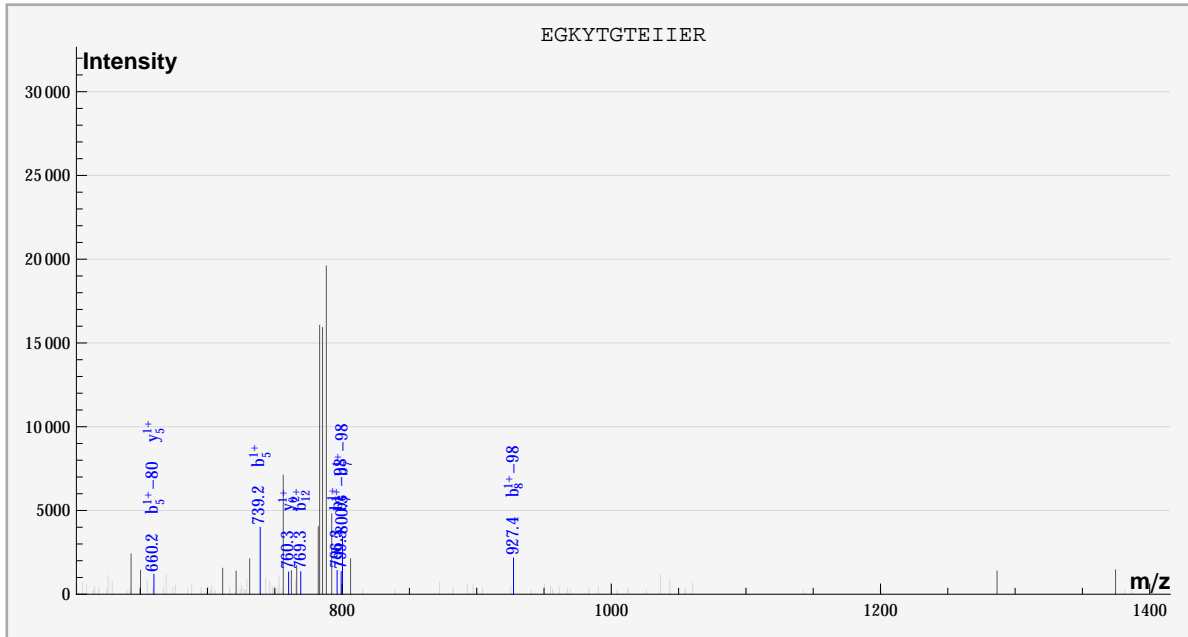

|   | #  | b | b* | #  | y | y* | P | P* |
|---|----|---|----|----|---|----|---|----|
| E | 1  |   |    |    |   |    |   |    |
| G | 2  |   |    | 11 |   |    |   |    |
| K | 3  |   |    | 10 |   |    |   |    |
| Y | 4  |   |    | 9  |   |    |   |    |
| T | 5  | ✓ | ✓  | 8  |   |    |   |    |
| G | 6  | ✓ |    | 7  |   |    |   |    |
| T | 7  |   | ✓  | 6  | ✓ |    |   |    |
| E | 8  |   | ✓  | 5  | ✓ |    |   |    |
| I | 9  |   |    | 4  |   |    |   |    |
| I | 10 |   |    | 3  |   |    |   |    |
| E | 11 |   |    | 2  |   |    |   |    |
| R | 12 | ✓ |    | 1  |   |    |   |    |

E G K Y T G T E I I E R

dbValid true GLNTSK PHOS(2) 1. 778. 1.27358 5.22968 100. ? 2298.  
 S\_Acido\_new%gi|68567384|gb|AAy80313.1| GLNTSK%:::PHOS:PHOS::%sample\_2%cmpd\_975

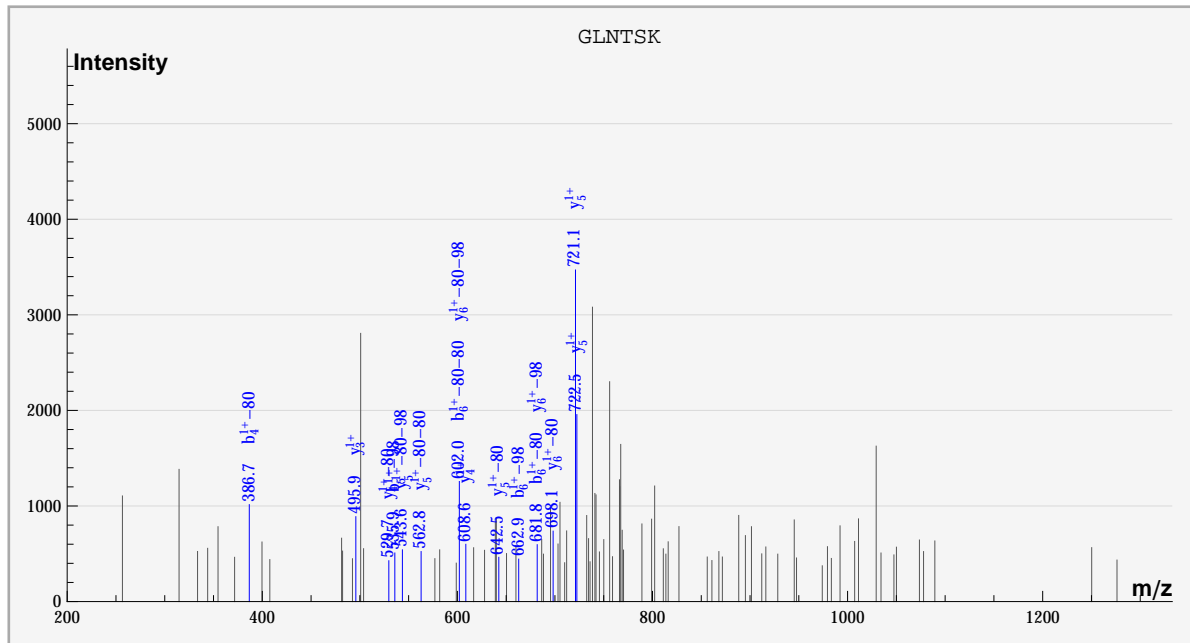

|   | # | b | b* | # | y | y* | P | P* |
|---|---|---|----|---|---|----|---|----|
| G | 1 |   |    |   |   |    |   | ✓  |
| L | 2 |   |    | 5 | ✓ | ✓  |   |    |
| N | 3 |   |    | 4 | ✓ | ✓  |   |    |
| T | 4 | ✓ |    | 3 | ✓ |    |   |    |
| S | 5 | ✓ |    | 2 |   |    |   |    |
| K | 6 | ✓ |    | 1 |   |    |   |    |

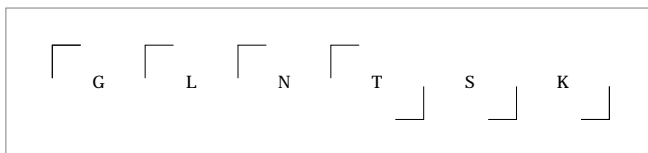

dbValid true STMDGAGVKLYR Oxidation\_M(1),PHOS(3) 2. 778.  
 -0.721013 5.09223 100. ? 2892. S\_Acido\_new%g|68568654|gb|AAY81583.1|  
 STMDGAGVKLYR%:PHOS:PHOS:Oxidation\_M:.....PHOS::%sample\_2%compd\_1519

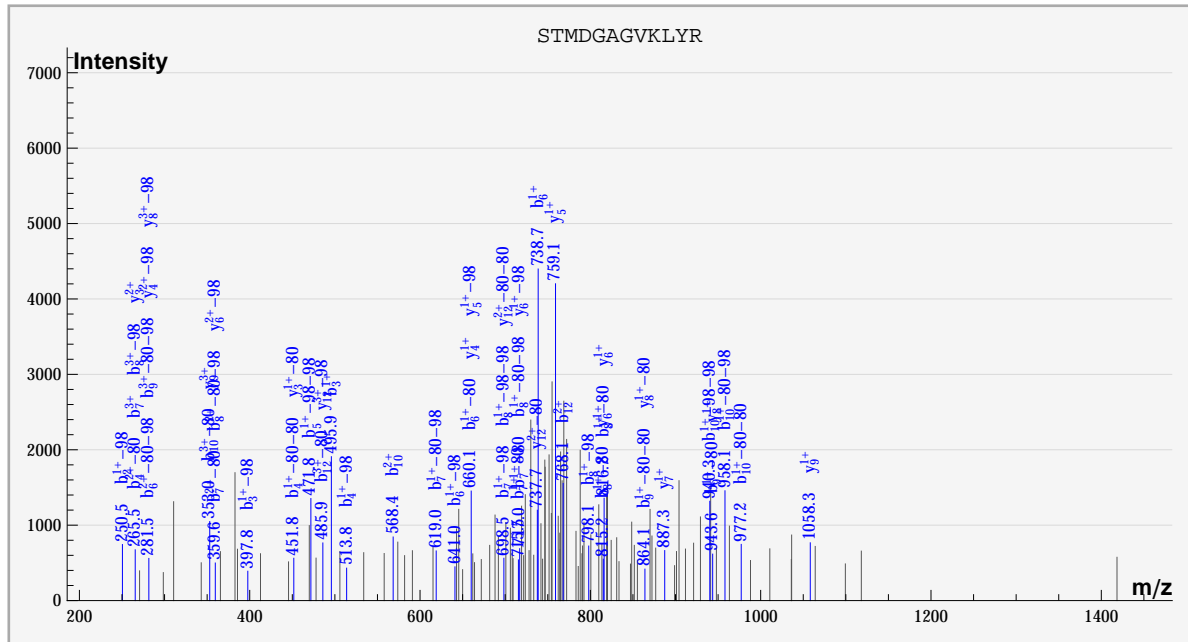

|   | #  | b | b* | #  | y | y* | P | P* |
|---|----|---|----|----|---|----|---|----|
| S | 1  |   |    |    |   |    |   | ✓  |
| T | 2  |   | ✓  | 11 |   |    |   |    |
| M | 3  | ✓ | ✓  | 10 |   |    |   |    |
| D | 4  |   | ✓  | 9  | ✓ |    |   |    |
| G | 5  |   | ✓  | 8  | ✓ | ✓  |   |    |
| A | 6  | ✓ | ✓  | 7  | ✓ | ✓  |   |    |
| G | 7  | ✓ | ✓  | 6  | ✓ | ✓  |   |    |
| V | 8  |   | ✓  | 5  | ✓ | ✓  |   |    |
| K | 9  |   | ✓  | 4  | ✓ | ✓  |   |    |
| L | 10 | ✓ | ✓  | 3  | ✓ | ✓  |   |    |
| Y | 11 |   |    | 2  |   |    |   |    |
| R | 12 | ✓ | ✓  | 1  |   |    |   |    |

[ S T ] M [ D ] G [ A ] G [ V ] K [ L ] Y R [ ]

dbValid true YFGKEYAQQIVK PHOS(1) 2. 778. -0.626393 5.26701 100. ? 354.  
 S\_Acido\_new%gi|68567764|gb|AA80693.1| YFGKEYAQQIVK%:::PHOS:::sample\_2%compd\_2086

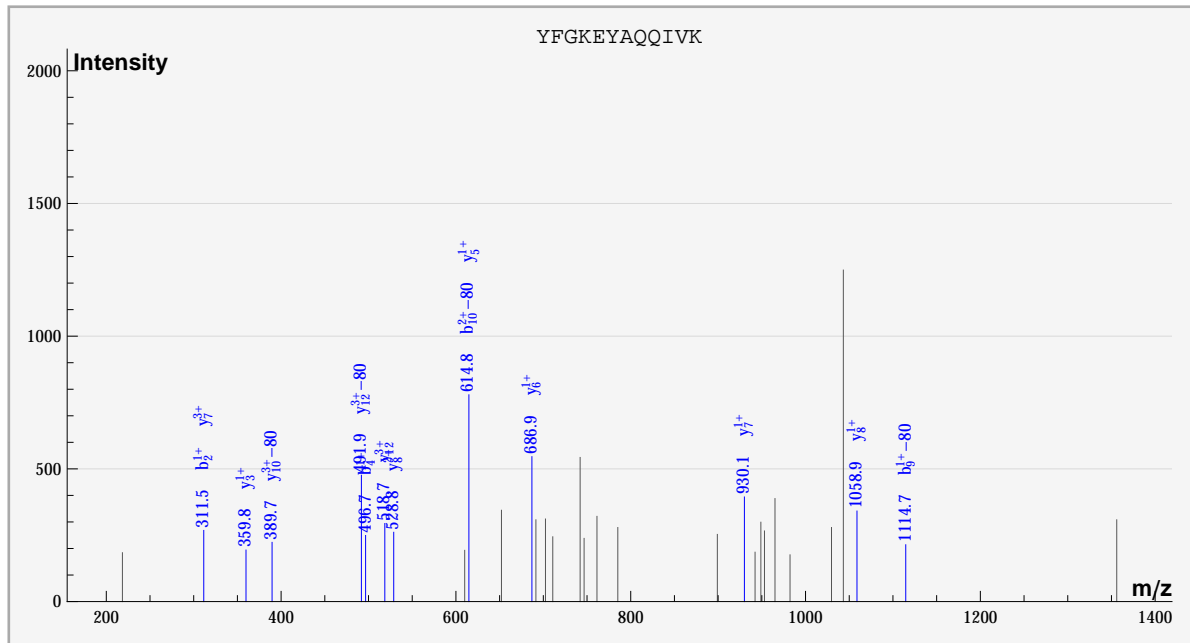

|   | #  | b | b* | #  | y | y* | P | P* |
|---|----|---|----|----|---|----|---|----|
| Y | 1  |   |    |    |   |    | ✓ | ✓  |
| F | 2  | ✓ |    | 11 |   |    |   |    |
| G | 3  |   |    | 10 | ✓ |    |   |    |
| K | 4  | ✓ |    | 9  |   |    |   |    |
| E | 5  |   |    | 8  | ✓ |    |   |    |
| Y | 6  |   |    | 7  | ✓ |    |   |    |
| A | 7  |   |    | 6  | ✓ |    |   |    |
| Q | 8  |   |    | 5  | ✓ |    |   |    |
| Q | 9  | ✓ |    | 4  |   |    |   |    |
| I | 10 | ✓ |    | 3  | ✓ |    |   |    |
| V | 11 |   |    | 2  |   |    |   |    |
| K | 12 |   |    | 1  |   |    |   |    |

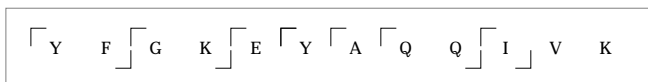

dbValid true DLNSLVIQQTNTK PHOS(1) 2. 779. -1.61783 5.09123 100. ? 2748.  
 S\_Acido\_new%gil68567551|gb|AAY80480.1| DLNSLVIQQTNTK%::::::::::PHOS::%sample\_2%cmpd\_1388

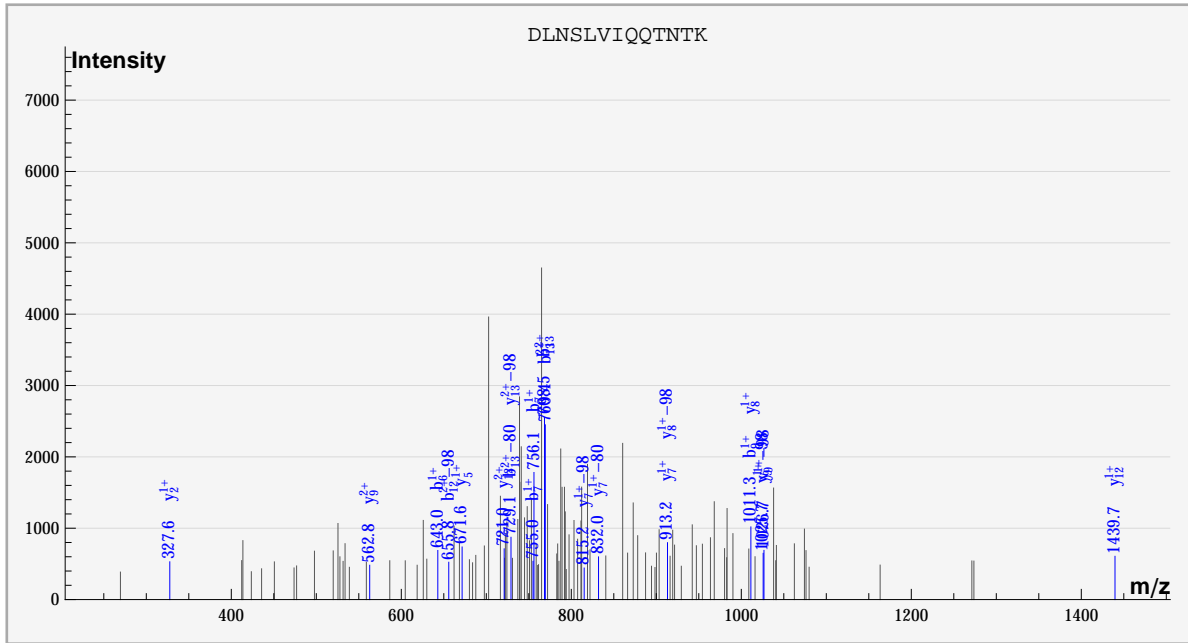

|   | #  | b | b* | #  | y | y* | P | P* |
|---|----|---|----|----|---|----|---|----|
| D | 1  |   |    |    |   |    |   | ✓  |
| L | 2  |   |    | 12 | ✓ |    |   |    |
| N | 3  |   |    | 11 |   |    |   |    |
| S | 4  |   |    | 10 |   |    |   |    |
| L | 5  |   |    | 9  | ✓ | ✓  |   |    |
| V | 6  | ✓ |    | 8  | ✓ | ✓  |   |    |
| I | 7  | ✓ |    | 7  | ✓ | ✓  |   |    |
| Q | 8  |   |    | 6  |   |    |   |    |
| Q | 9  | ✓ |    | 5  | ✓ |    |   |    |
| T | 10 |   |    | 4  |   |    |   |    |
| N | 11 |   |    | 3  |   |    |   |    |
| T | 12 |   | ✓  | 2  | ✓ |    |   |    |
| K | 13 | ✓ | ✓  | 1  |   |    |   |    |

「 D 「 L N S 「 L 「 V 「 I 」 Q 「 Q 」 T N 「 T 」 K 」

dbValid true STMDGAGVKLYR Oxidation\_M(1),PHOS(3) 2. 779.  
 -1.72101 5.14297 100. ? 2880. S\_Acido\_new%g|68568654|gb|AAY81583.1|  
 STMDGAGVKLYR%:PHOS:PHOS:Oxidation\_M:::PHOS::%sample\_2%compd\_1510

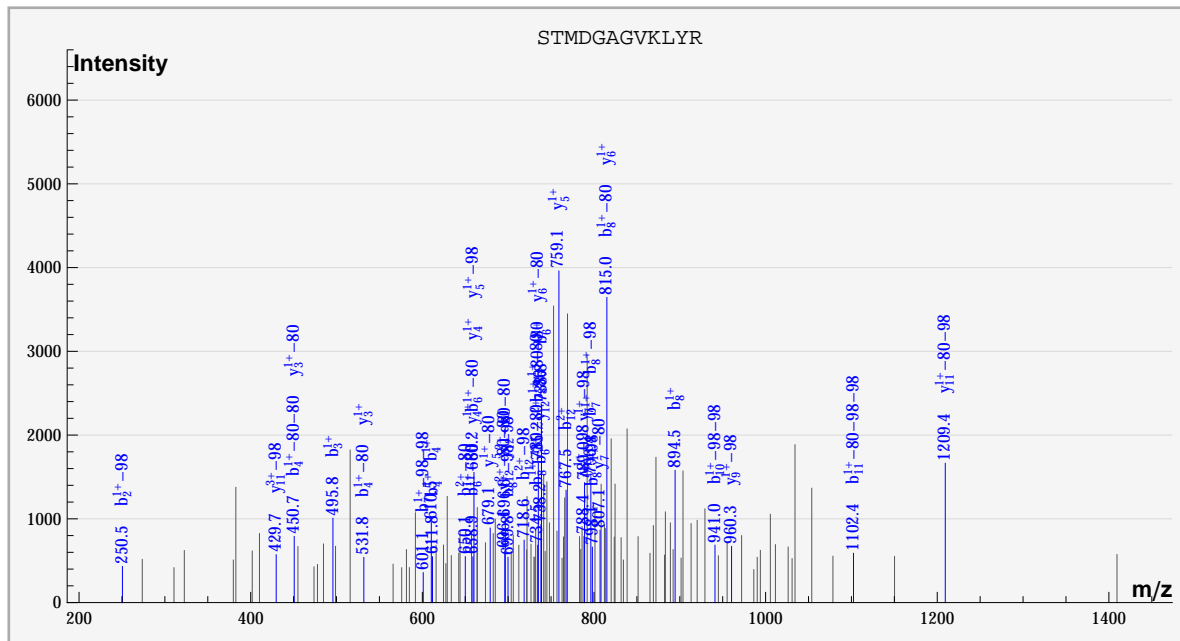

|   | #  | b | b* | #  | y | y* | P | P* |
|---|----|---|----|----|---|----|---|----|
| S | 1  |   |    |    |   |    |   | ✓  |
| T | 2  |   | ✓  | 11 |   | ✓  |   |    |
| M | 3  | ✓ |    | 10 |   |    |   |    |
| D | 4  | ✓ | ✓  | 9  |   | ✓  |   |    |
| G | 5  |   |    | 8  |   |    |   |    |
| A | 6  | ✓ | ✓  | 7  |   | ✓  |   |    |
| G | 7  | ✓ | ✓  | 6  | ✓ | ✓  |   |    |
| V | 8  | ✓ | ✓  | 5  | ✓ | ✓  |   |    |
| K | 9  |   |    | 4  | ✓ |    |   |    |
| L | 10 |   | ✓  | 3  | ✓ | ✓  |   |    |
| Y | 11 |   | ✓  | 2  |   |    |   |    |
| R | 12 | ✓ | ✓  | 1  |   |    |   |    |

「 S 「 T 」 M 「 D 」 G 「 A 」 G 「 V 」 K 「 L 」 Y 「 R 」



dbValid true IDDLVAASALKTEK PHOS(1) 2. 779. -1.60527 5.21582 100. ? 2982.  
 S\_Acido\_new%gi|68567802|gb|AAY80731.1| IDDLVAASALKTEK%:::PHOS:::sample\_2%cmpd\_1599

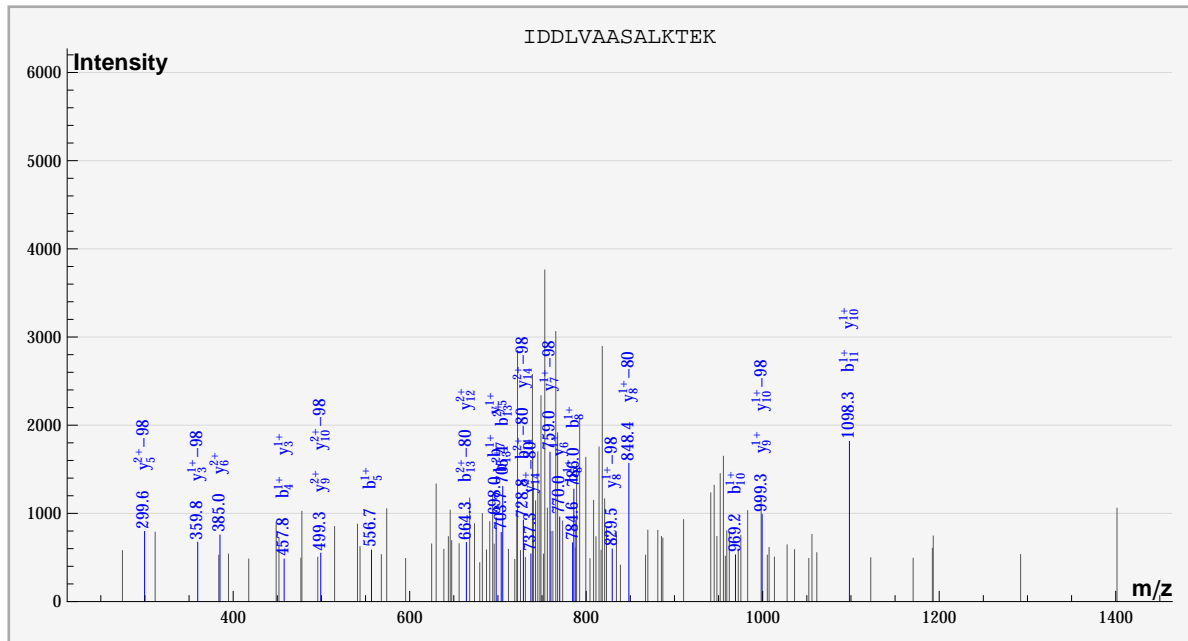

|   | #  | b | b* | #  | y | y* | P | P* |
|---|----|---|----|----|---|----|---|----|
| I | 1  |   |    |    |   |    |   | ✓  |
| D | 2  |   |    | 13 |   |    |   |    |
| D | 3  |   |    | 12 | ✓ |    |   |    |
| L | 4  | ✓ |    | 11 |   |    |   |    |
| V | 5  | ✓ |    | 10 | ✓ | ✓  |   |    |
| A | 6  | ✓ |    | 9  | ✓ |    |   |    |
| A | 7  | ✓ |    | 8  |   | ✓  |   |    |
| S | 8  | ✓ |    | 7  |   | ✓  |   |    |
| A | 9  | ✓ |    | 6  | ✓ |    |   |    |
| L | 10 | ✓ |    | 5  | ✓ | ✓  |   |    |
| K | 11 | ✓ |    | 4  |   |    |   |    |
| T | 12 |   |    | 3  | ✓ | ✓  |   |    |
| E | 13 | ✓ | ✓  | 2  |   |    |   |    |
| K | 14 |   | ✓  | 1  |   |    |   |    |

I D D L V A A S A L K T E K

dbValid true NSLHVK PHOS(1) 1. 779. -1.63455 5.0968 100. ? 3114.

S\_Acido\_new%gi|68566747|gb|AAY79676.1| NSLHVK%::PHOS::::%sample\_2%compd\_1721

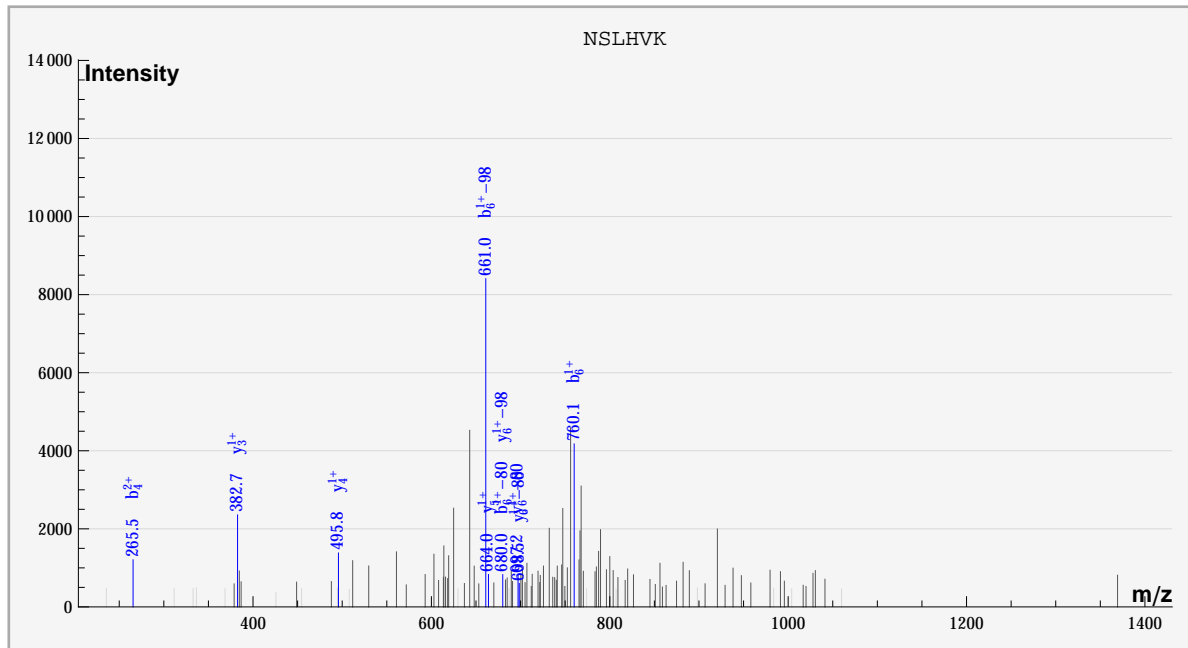

|   | # | b | b* | # | y | y* | P | P* |
|---|---|---|----|---|---|----|---|----|
| N | 1 |   |    |   |   |    |   | ✓  |
| S | 2 |   |    | 5 | ✓ |    |   |    |
| L | 3 |   |    | 4 | ✓ |    |   |    |
| H | 4 | ✓ |    | 3 | ✓ |    |   |    |
| V | 5 |   |    | 2 |   |    |   |    |
| K | 6 | ✓ | ✓  | 1 |   |    |   |    |

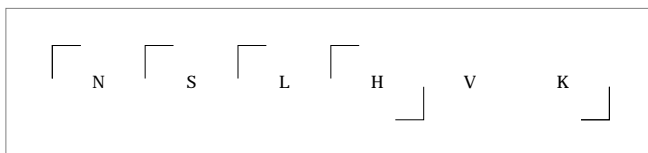

dbValid true DLTVYFYRREK PHOS(1) 2. 787. -1.62332 5.24521 100. ? 3066.

S\_Acido\_new%gi|68567891|gb|AAY80820.1| DLTVYFYRREK%:::PHOS::::::::::%sample\_0%cmpd\_1513

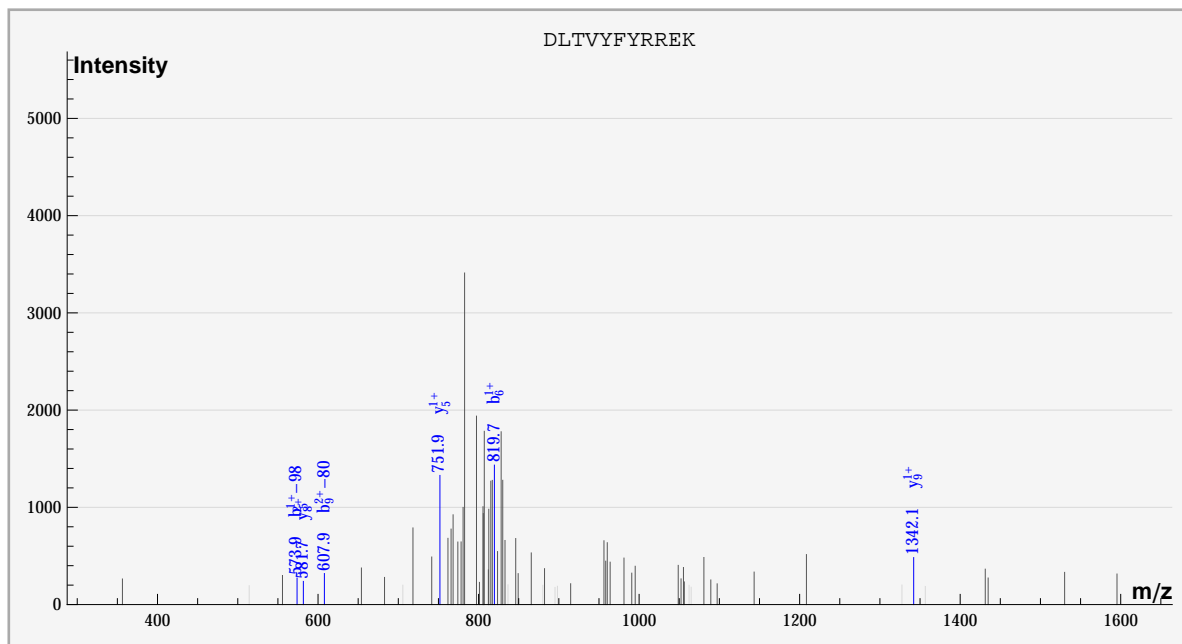

|   | #  | b | b* | #  | y | y* | P | P* |
|---|----|---|----|----|---|----|---|----|
| D | 1  |   |    |    |   |    |   |    |
| L | 2  |   |    | 10 |   |    |   |    |
| T | 3  |   |    | 9  | ✓ |    |   |    |
| V | 4  |   |    | 8  | ✓ |    |   |    |
| Y | 5  | ✓ |    | 7  |   |    |   |    |
| F | 6  | ✓ |    | 6  |   |    |   |    |
| Y | 7  |   |    | 5  | ✓ |    |   |    |
| R | 8  |   |    | 4  |   |    |   |    |
| R | 9  |   | ✓  | 3  |   |    |   |    |
| E | 10 |   |    | 2  |   |    |   |    |
| K | 11 |   |    | 1  |   |    |   |    |

D L T V Y F Y R R E K

dbValid true YMREFGLFEYR PHOS(1) 2. 794. 1.84416 5.06538 100. ? 2238.

S\_Acido\_new%gi|68568187|gb|AAY81116.1| YMREFGLFEYR%:PHOS:.....%sample\_1%compd\_910

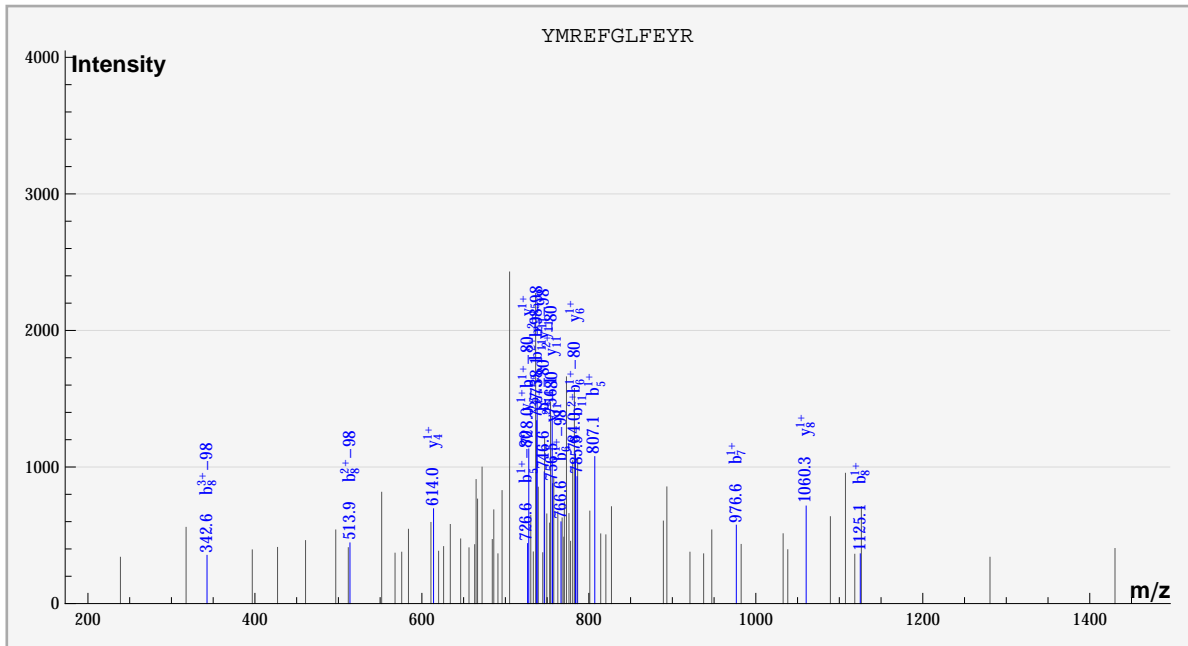

|   | #  | b | b* | #  | y | y* | P | P* |
|---|----|---|----|----|---|----|---|----|
| Y | 1  |   |    |    |   |    |   | ✓  |
| M | 2  |   |    | 10 |   |    |   |    |
| R | 3  |   |    | 9  |   |    |   |    |
| E | 4  |   |    | 8  | ✓ |    |   |    |
| F | 5  | ✓ | ✓  | 7  |   |    |   |    |
| G | 6  |   | ✓  | 6  | ✓ |    |   |    |
| L | 7  | ✓ |    | 5  | ✓ |    |   |    |
| F | 8  | ✓ | ✓  | 4  | ✓ |    |   |    |
| E | 9  |   |    | 3  |   |    |   |    |
| Y | 10 |   |    | 2  |   |    |   |    |
| R | 11 | ✓ | ✓  | 1  |   |    |   |    |

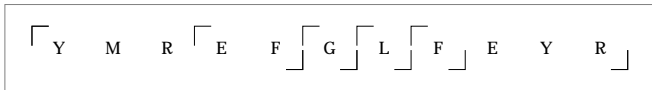

dbValid true WSRVEDIDNEIK PHOS(1) 2. 794. -1.64132 5.13919 100. ? 2280.  
 S\_Acido\_new%gi|68566832|gb|AAAY79761.1| WSRVEDIDNEIK%::PHOS:.....%sample\_0%cmpd\_874

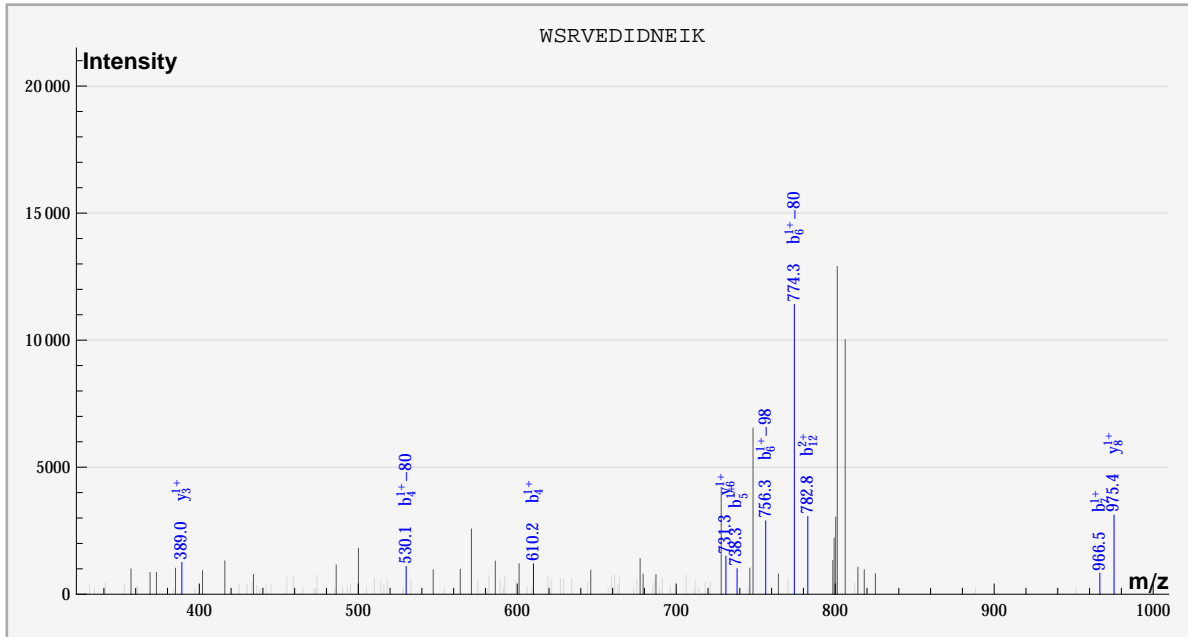

|   | #  | b | b* | #  | y | y* | P | P* |
|---|----|---|----|----|---|----|---|----|
| W | 1  |   |    |    |   |    |   |    |
| S | 2  |   |    | 11 |   |    |   |    |
| R | 3  |   |    | 10 |   |    |   |    |
| V | 4  | ✓ | ✓  | 9  |   |    |   |    |
| E | 5  | ✓ |    | 8  | ✓ |    |   |    |
| D | 6  |   | ✓  | 7  |   |    |   |    |
| I | 7  | ✓ |    | 6  | ✓ |    |   |    |
| D | 8  |   |    | 5  |   |    |   |    |
| N | 9  |   |    | 4  |   |    |   |    |
| E | 10 |   |    | 3  | ✓ |    |   |    |
| I | 11 |   |    | 2  |   |    |   |    |
| K | 12 | ✓ |    | 1  |   |    |   |    |

W S R V E D I D N E I K

dbValid true GTEFQILTKTSRK PHOS(1) 2. 794. 0.908347 5.13084 100. ? 3090.  
 S\_Acido\_new%gi|68568285|gb|AAy81214.1| GTEFQILTKTSRK%:::PHOS:::sample\_1%cmpd\_1687

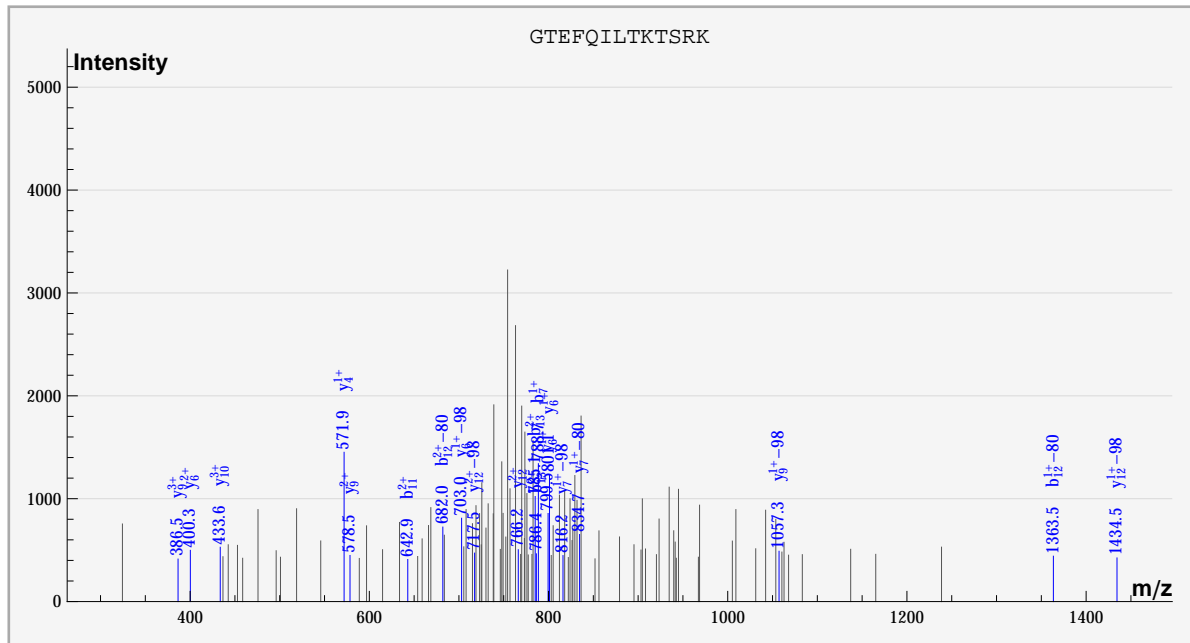

|   | #  | b | b* | #  | y | y* | P | P* |
|---|----|---|----|----|---|----|---|----|
| G | 1  |   |    |    |   |    |   |    |
| T | 2  |   |    | 12 | ✓ | ✓  |   |    |
| E | 3  |   |    | 11 |   |    |   |    |
| F | 4  |   |    | 10 | ✓ |    |   |    |
| Q | 5  |   |    | 9  | ✓ | ✓  |   |    |
| I | 6  |   |    | 8  |   |    |   |    |
| L | 7  | ✓ |    | 7  |   | ✓  |   |    |
| T | 8  |   |    | 6  | ✓ | ✓  |   |    |
| K | 9  |   |    | 5  |   |    |   |    |
| T | 10 |   |    | 4  | ✓ |    |   |    |
| S | 11 | ✓ |    | 3  |   |    |   |    |
| R | 12 |   | ✓  | 2  |   |    |   |    |
| K | 13 | ✓ |    | 1  |   |    |   |    |

G T E F Q I L T K T S R K

dbValid true QSLLTVTKTLNK PHOS(3) 2. 795. -1.64444 5.46826 100. ? 2322.

S\_Acido\_new%gii68566527|gb|AAY79456.1| QSLLTVTKTLNK%::PHOS::PHOS:::PHOS:::%sample\_1%cmpd\_989

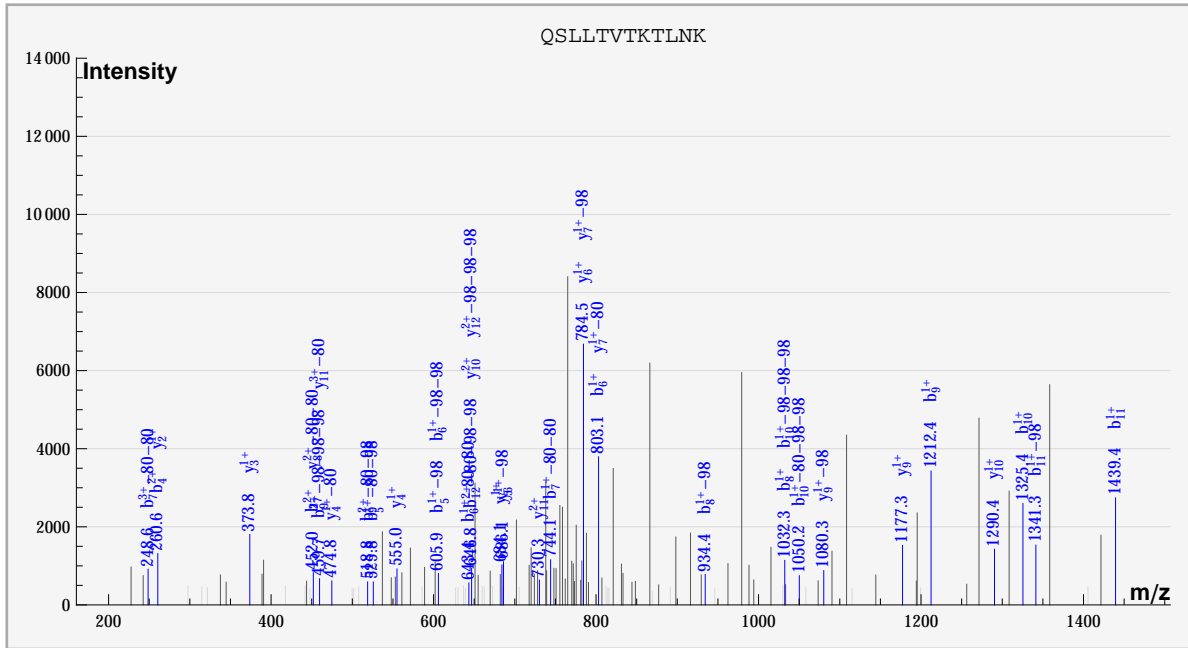

|   | #  | b | b* | #  | y | y* | P | P* |
|---|----|---|----|----|---|----|---|----|
| Q | 1  |   |    |    |   |    |   | ✓  |
| S | 2  |   |    | 11 | ✓ | ✓  |   |    |
| L | 3  |   |    | 10 | ✓ |    |   |    |
| L | 4  | ✓ |    | 9  | ✓ | ✓  |   |    |
| T | 5  |   | ✓  | 8  |   | ✓  |   |    |
| V | 6  | ✓ | ✓  | 7  |   | ✓  |   |    |
| T | 7  | ✓ | ✓  | 6  | ✓ | ✓  |   |    |
| K | 8  | ✓ | ✓  | 5  | ✓ |    |   |    |
| T | 9  | ✓ | ✓  | 4  | ✓ | ✓  |   |    |
| L | 10 | ✓ | ✓  | 3  | ✓ |    |   |    |
| N | 11 | ✓ | ✓  | 2  |   | ✓  |   |    |
| K | 12 |   | ✓  | 1  |   |    |   |    |

Q S L L T V T K T L N K

dbValid true QSLLTVTKTLNK PHOS(3) 2. 795. -1.64444 6.80645 100. ? 2340.

S\_Acido\_new%gil68566527|gb|AAY79456.1| QSLLTVTKTLNK::PHOS::PHOS:::PHOS:::sample\_1%compd\_1000

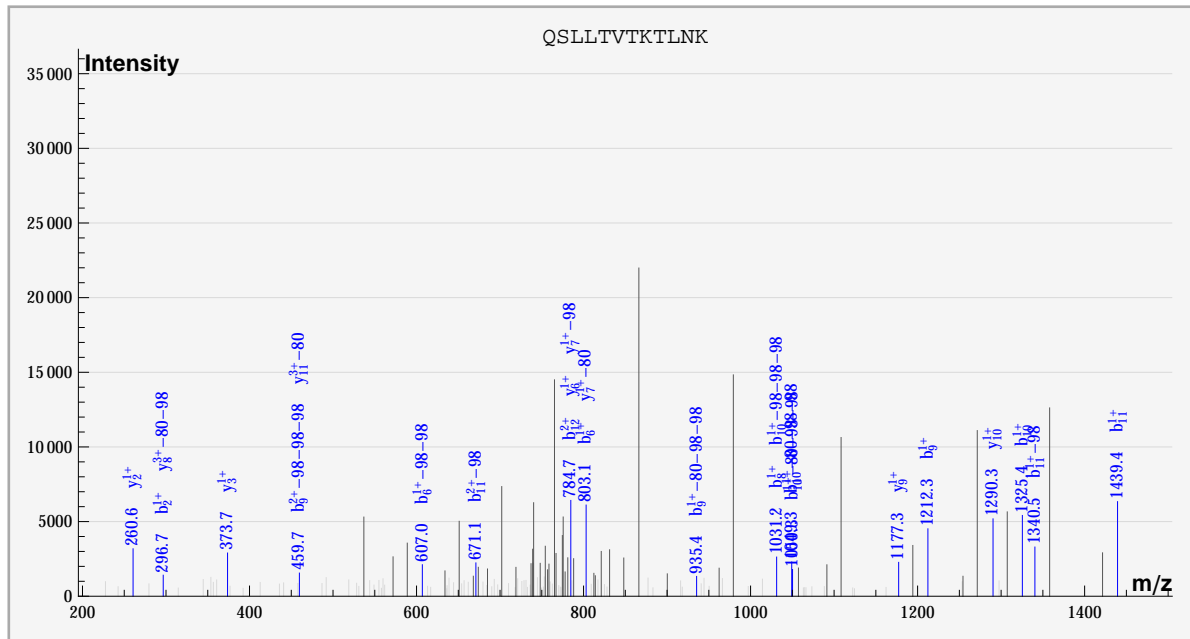

|   | #  | b | b* | #  | y | y* | P | P* |
|---|----|---|----|----|---|----|---|----|
| Q | 1  |   |    |    |   |    |   |    |
| S | 2  | ✓ |    | 11 |   | ✓  |   |    |
| L | 3  |   |    | 10 | ✓ |    |   |    |
| L | 4  |   |    | 9  | ✓ |    |   |    |
| T | 5  |   |    | 8  |   | ✓  |   |    |
| V | 6  | ✓ | ✓  | 7  |   | ✓  |   |    |
| T | 7  |   |    | 6  | ✓ |    |   |    |
| K | 8  | ✓ |    | 5  |   |    |   |    |
| T | 9  | ✓ | ✓  | 4  |   |    |   |    |
| L | 10 | ✓ | ✓  | 3  | ✓ |    |   |    |
| N | 11 | ✓ | ✓  | 2  | ✓ |    |   |    |
| K | 12 | ✓ |    | 1  |   |    |   |    |

Q [ S ] L [ L ] T [ V ] T K ] T [ L ] N ] K ]



dbValid true TIKSLR PHOS(1) 1. 796. 1.42806 5.08901 100. ? 3804.  
 S\_Acido\_new%gi|68567311|gb|AAY80240.1| TIKSLR%::::PHOS:::%sample\_1%compd\_2342

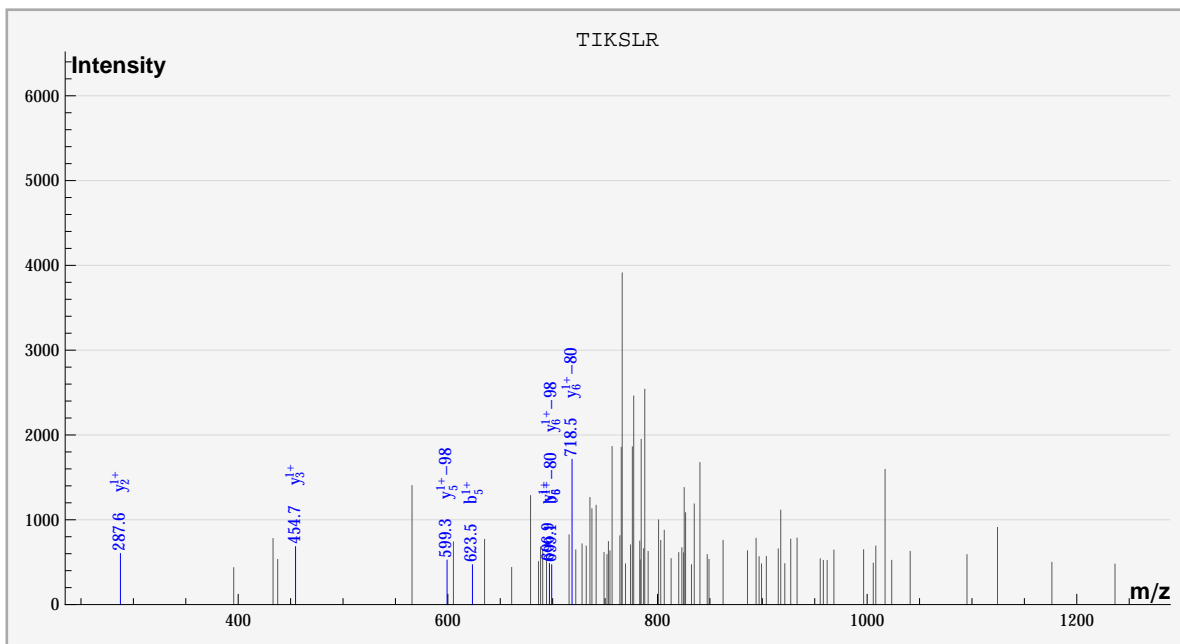

|   | # | b | b* | # | y | y* | P | P* |
|---|---|---|----|---|---|----|---|----|
| T | 1 |   |    |   |   |    |   | ✓  |
| I | 2 |   |    | 5 | ✓ | ✓  |   |    |
| K | 3 |   |    | 4 |   |    |   |    |
| S | 4 |   |    | 3 | ✓ |    |   |    |
| L | 5 | ✓ |    | 2 | ✓ |    |   |    |
| R | 6 |   | ✓  | 1 |   |    |   |    |

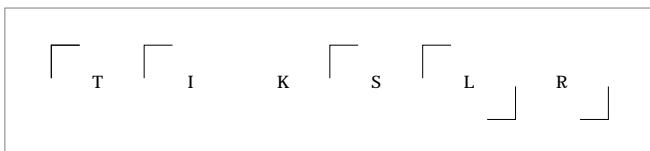

dbValid true YVDEWKEKMLR Oxidation\_M(1),PHOS(1) 2. 796. 0.862542 5.36721 100. ? 4194.  
 S\_Acido\_new%gi68566683|gb|AA79612.1| YVDEWKEKMLR%:PHOS:::Oxidation\_M:::sample\_1%cmpd\_2697

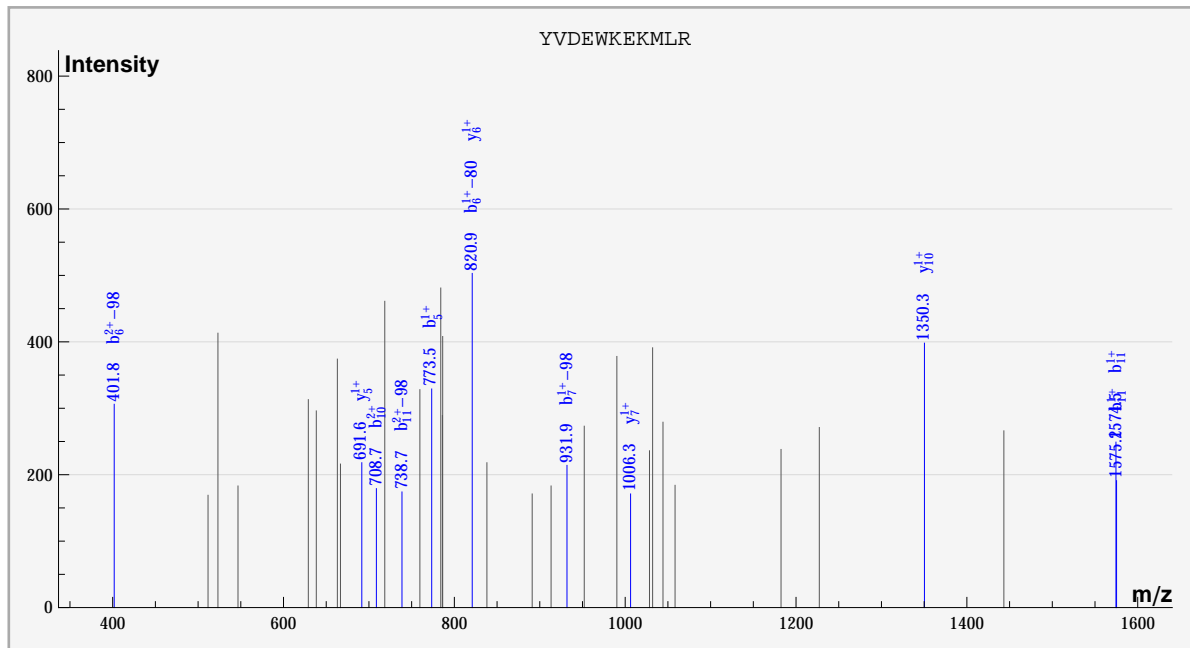

|   | #  | b | b* | #  | y | y* | P | P* |
|---|----|---|----|----|---|----|---|----|
| Y | 1  |   |    |    |   |    |   |    |
| V | 2  |   |    | 10 | ✓ |    |   |    |
| D | 3  |   |    | 9  |   |    |   |    |
| E | 4  |   |    | 8  |   |    |   |    |
| W | 5  | ✓ |    | 7  | ✓ |    |   |    |
| K | 6  |   | ✓  | 6  | ✓ |    |   |    |
| E | 7  |   | ✓  | 5  | ✓ |    |   |    |
| K | 8  |   |    | 4  |   |    |   |    |
| M | 9  |   |    | 3  |   |    |   |    |
| L | 10 | ✓ |    | 2  |   |    |   |    |
| R | 11 | ✓ | ✓  | 1  |   |    |   |    |

Y [ V D E [ W [ K [ E ] K M L ] R ]

dbValid true RSSQLK PHOS(1) 1. 797. 1.38693 5.00082 100. ? 2508.  
 S\_Acido\_new%gi|68567464|gb|AAY80393.1| RSSQLK%:::PHOS:::%sample\_1%compd\_1158

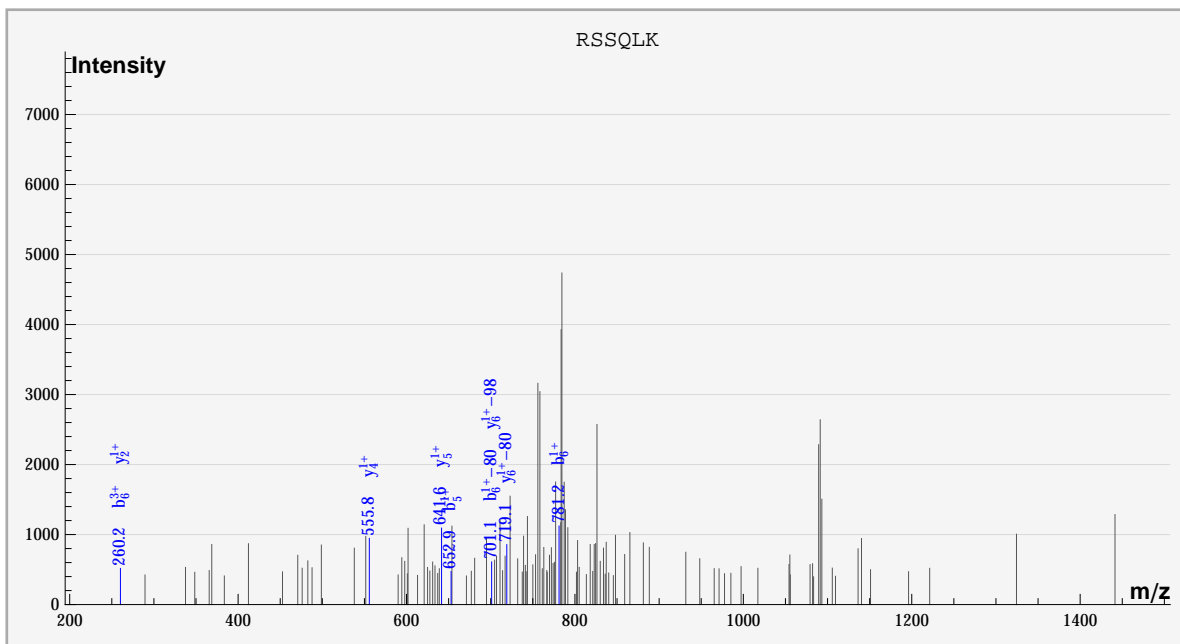

|   | # | b | b* | # | y | y* | P | P* |
|---|---|---|----|---|---|----|---|----|
| R | 1 |   |    |   |   |    |   | ✓  |
| S | 2 |   |    | 5 | ✓ |    |   |    |
| S | 3 |   |    | 4 | ✓ |    |   |    |
| Q | 4 |   |    | 3 |   |    |   |    |
| L | 5 | ✓ |    | 2 | ✓ |    |   |    |
| K | 6 | ✓ | ✓  | 1 |   |    |   |    |

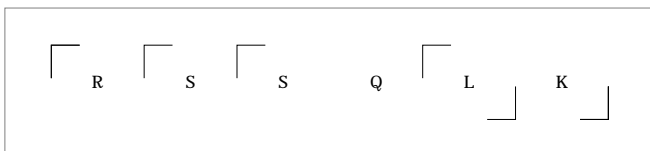

dbValid true IDSPRK PHOS(1) 1. 797. -1.62399 5.27336 100. ? 2862.

S\_Acido\_new%gi|68568590|gb|AAY81519.1| IDSPRK%:::PHOS:::%sample\_1%compd\_1479

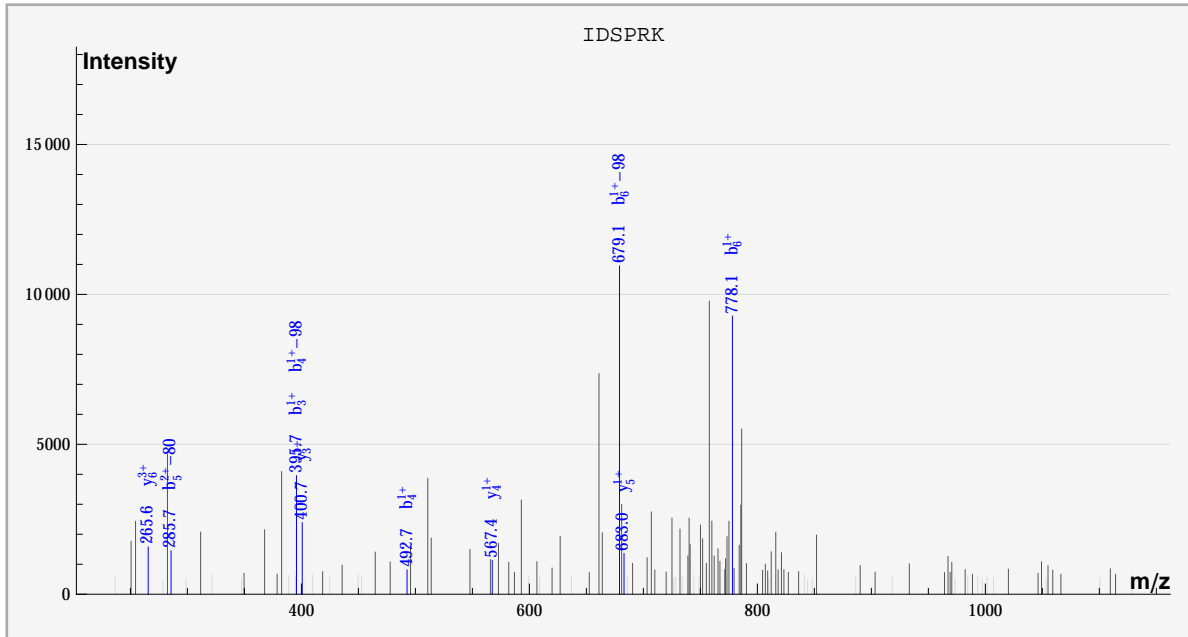

|   | # | b | b* | # | y | y* | P | P* |
|---|---|---|----|---|---|----|---|----|
| I | 1 |   |    |   |   |    | ✓ |    |
| D | 2 |   |    | 5 | ✓ |    |   |    |
| S | 3 | ✓ |    | 4 | ✓ |    |   |    |
| P | 4 | ✓ | ✓  | 3 | ✓ |    |   |    |
| R | 5 |   | ✓  | 2 |   |    |   |    |
| K | 6 | ✓ | ✓  | 1 |   |    |   |    |

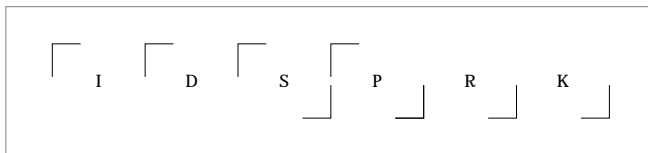

dbValid true VINTLR PHOS(1) 1. 797. -1.5876 5.71394 100. ? 3066.  
 S\_Acido\_new%gi|68567260|gb|AAY80189.1| VINTLR%::::PHOS:::%sample\_1%cmpd\_1668

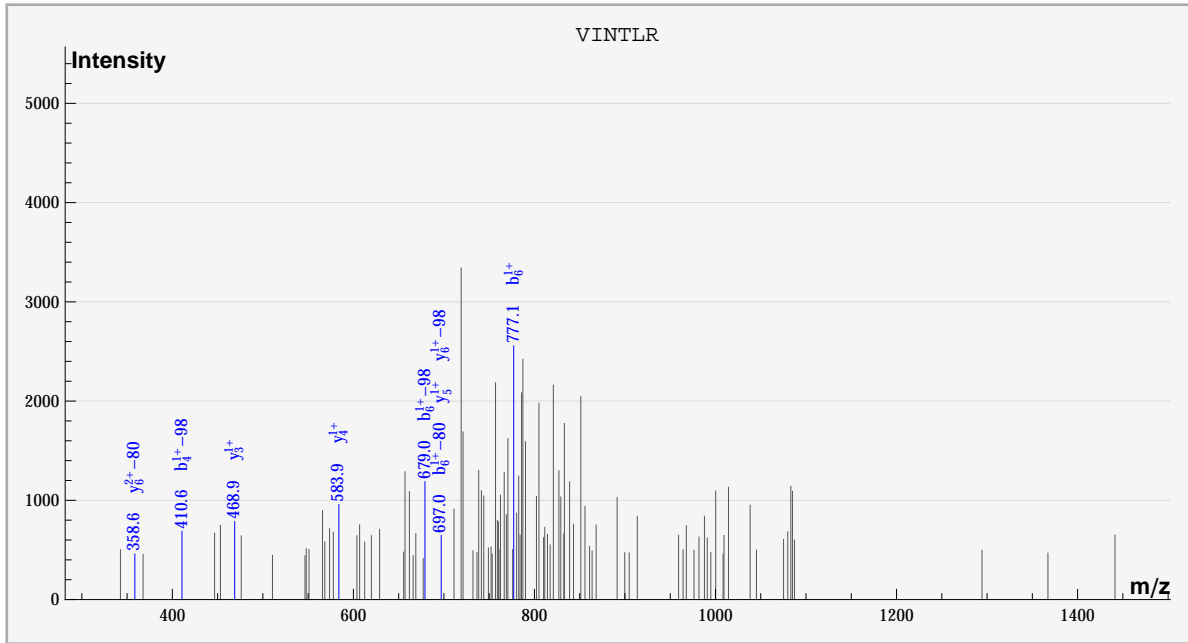

|   | # | b | b* | # | y | y* | P | P* |
|---|---|---|----|---|---|----|---|----|
| V | 1 |   |    |   |   |    |   | ✓  |
| I | 2 |   |    | 5 | ✓ |    |   |    |
| N | 3 |   |    | 4 | ✓ |    |   |    |
| T | 4 | ✓ |    | 3 | ✓ |    |   |    |
| L | 5 |   |    | 2 |   |    |   |    |
| R | 6 | ✓ | ✓  | 1 |   |    |   |    |

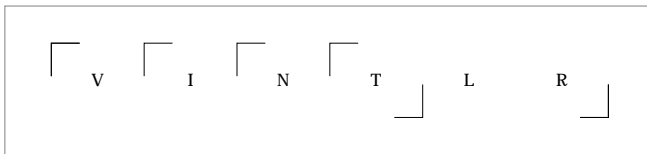

dbValid true IDSPRK PHOS(1) 1. 797. -1.62399 5.32848 100. ? 3114.  
 S\_Acido\_new%gi|68568590|gb|AAY81519.1| IDSPRK%:::PHOS:::%sample\_1%compd\_1712

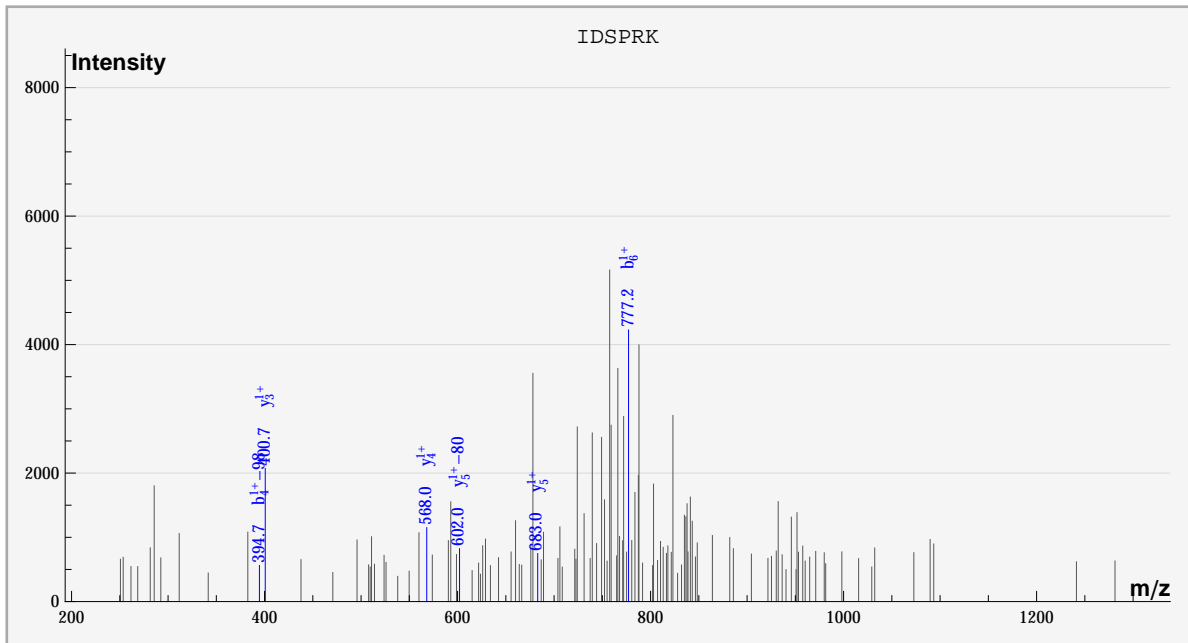

|   | # | b | b* | # | y | y* | P | P* |
|---|---|---|----|---|---|----|---|----|
| I | 1 |   |    |   |   |    |   |    |
| D | 2 |   |    | 5 | ✓ | ✓  |   |    |
| S | 3 |   |    | 4 | ✓ |    |   |    |
| P | 4 | ✓ |    | 3 | ✓ |    |   |    |
| R | 5 |   |    | 2 |   |    |   |    |
| K | 6 | ✓ |    | 1 |   |    |   |    |

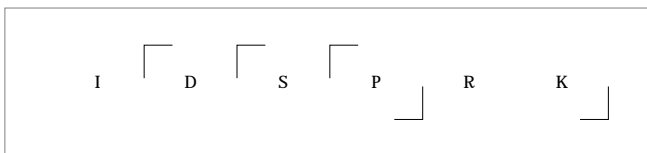

dbValid true YLVYASSRDQR PHOS(3) 2. 798. 1.29604 5.01926 100. ? 2628.

S\_Acido\_new%gi|68568101|gb|AAy81030.1| YLVYASSRDQR%:PHOS::PHOS::PHOS:::sample\_1%compd\_1270

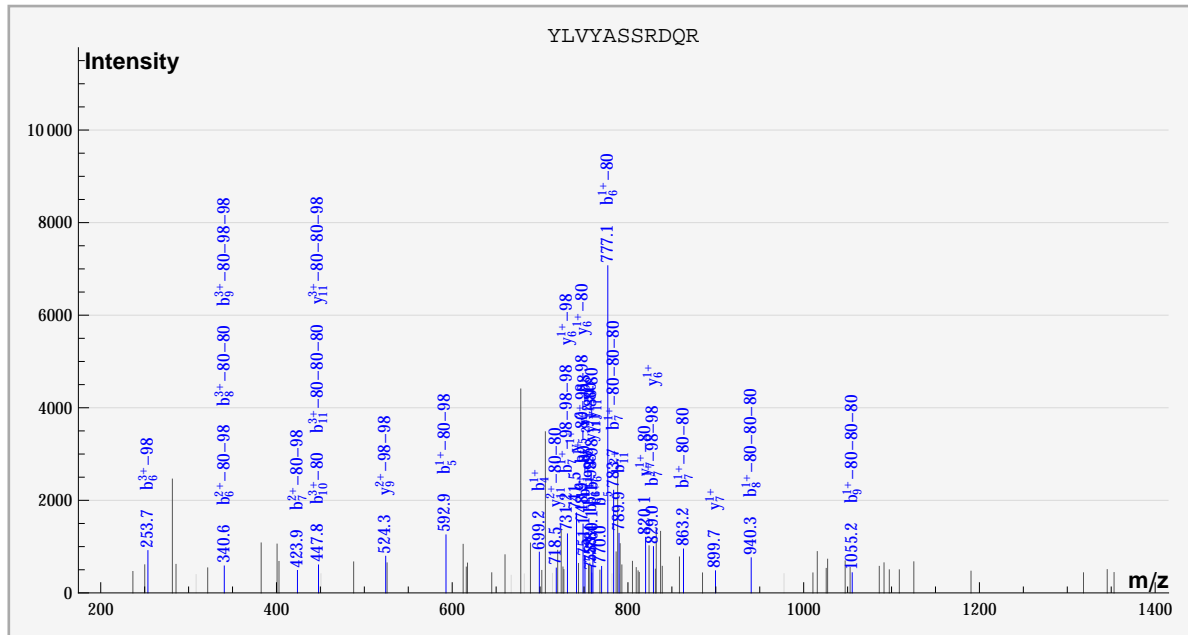

|   | #  | b | b* | #  | y | y* | P | P* |
|---|----|---|----|----|---|----|---|----|
| Y | 1  |   |    |    |   |    |   | ✓  |
| L | 2  |   |    | 10 |   |    |   |    |
| V | 3  |   |    | 9  |   | ✓  |   |    |
| Y | 4  | ✓ |    | 8  |   |    |   |    |
| A | 5  | ✓ | ✓  | 7  | ✓ | ✓  |   |    |
| S | 6  |   | ✓  | 6  | ✓ | ✓  |   |    |
| S | 7  |   | ✓  | 5  | ✓ |    |   |    |
| R | 8  |   | ✓  | 4  |   |    |   |    |
| D | 9  |   | ✓  | 3  |   |    |   |    |
| Q | 10 |   | ✓  | 2  |   |    |   |    |
| R | 11 | ✓ | ✓  | 1  |   |    |   |    |

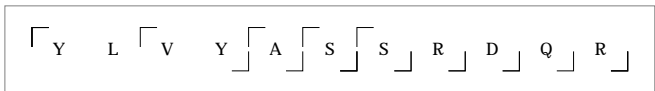

dbValid true VIVSNST PHOS(1) 1. 798. 1.35971 5.47429 100. ? 2640.  
 S\_Acido\_new%gi|68566636|gb|AAY79565.1| VIVSNST%:::::PHOS::%sample\_1%compd\_1281

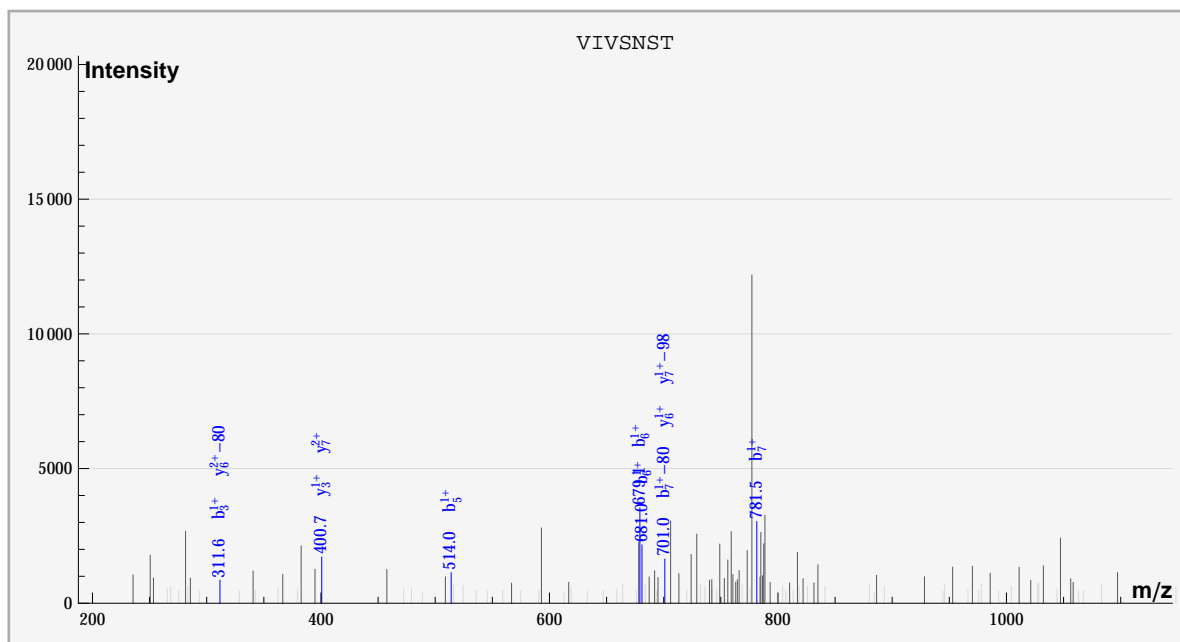

|   | # | b | b* | # | y | y* | P | P* |
|---|---|---|----|---|---|----|---|----|
| V | 1 |   |    |   |   |    | ✓ | ✓  |
| I | 2 |   |    | 6 | ✓ | ✓  |   |    |
| V | 3 | ✓ |    | 5 |   |    |   |    |
| S | 4 |   |    | 4 |   |    |   |    |
| N | 5 | ✓ |    | 3 | ✓ |    |   |    |
| S | 6 | ✓ |    | 2 |   |    |   |    |
| T | 7 | ✓ | ✓  | 1 |   |    |   |    |

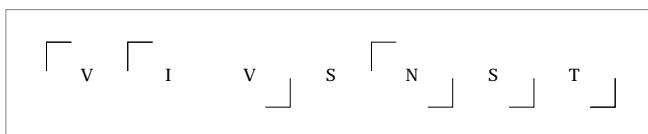



dbValid true MMGMTV Oxidation\_M(3),PHOS(1) 1. 798. -0.772125 5.32061 100. ?  
 2802. S\_Acido\_new%gi|68568315|gb|AAAY81244.1| S\_Acido\_new%gi|68568390|gb|AAAY81319.1|  
 MMGMTV%:Oxidation\_M:Oxidation\_M:Oxidation\_M:PHOS::%sample\_1%compd\_1425

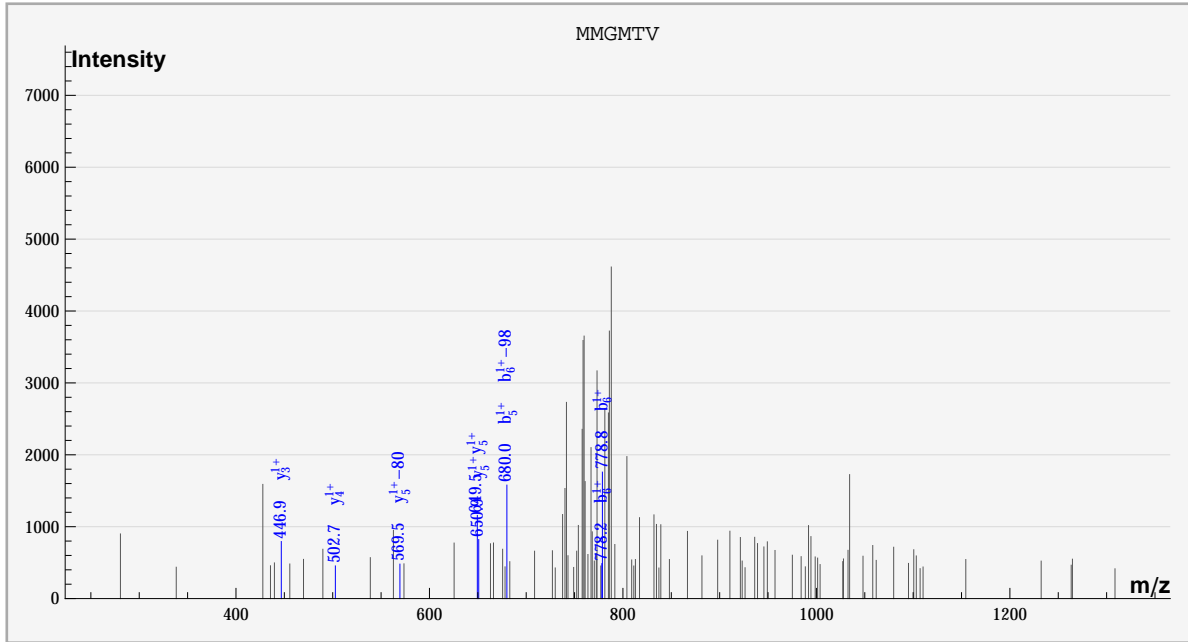

|   | # | b | b* | # | y | y* | P | P* |
|---|---|---|----|---|---|----|---|----|
| M | 1 |   |    |   |   |    |   |    |
| M | 2 |   |    | 5 | ✓ | ✓  |   |    |
| G | 3 |   |    | 4 | ✓ |    |   |    |
| M | 4 |   |    | 3 | ✓ |    |   |    |
| T | 5 | ✓ |    | 2 |   |    |   |    |
| V | 6 | ✓ | ✓  | 1 |   |    |   |    |

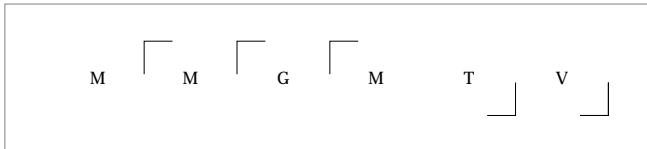

dbValid true RLSQELIEKASSR PHOS(1) 2. 798. 0.908877 6.14379 100. ? 3186.  
 S\_Acido\_new%gi|68567350|gb|AAI80279.1| RLSQELIEKASSR%:::PHOS:::sample\_1%cmpd\_1780

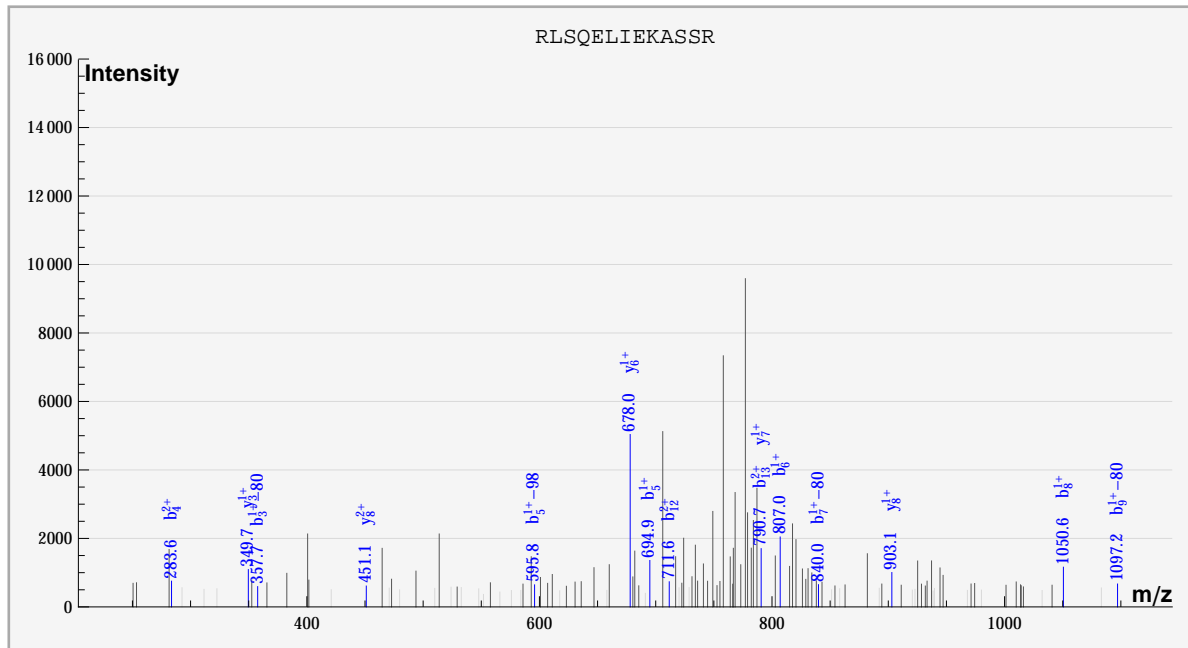

|   | #  | b | b* | #  | y | y* | P | P* |
|---|----|---|----|----|---|----|---|----|
| R | 1  |   |    |    |   |    |   |    |
| L | 2  |   |    | 12 |   |    |   |    |
| S | 3  |   | ✓  | 11 |   |    |   |    |
| Q | 4  | ✓ |    | 10 |   |    |   |    |
| E | 5  | ✓ | ✓  | 9  |   |    |   |    |
| L | 6  | ✓ |    | 8  | ✓ |    |   |    |
| I | 7  |   | ✓  | 7  | ✓ |    |   |    |
| E | 8  | ✓ |    | 6  | ✓ |    |   |    |
| K | 9  |   | ✓  | 5  |   |    |   |    |
| A | 10 |   |    | 4  |   |    |   |    |
| S | 11 |   |    | 3  | ✓ |    |   |    |
| S | 12 | ✓ |    | 2  |   |    |   |    |
| R | 13 | ✓ |    | 1  |   |    |   |    |

R L S Q E L I E K A S S R

dbValid true VIVSNST PHOS(1) 1. 798. 1.35971 5.79337 100. ? 3198.

S\_Acido\_new%gi|68566636|gb|AAY79565.1| VIVSNST%:::PHOS::%sample\_1%compd\_1791

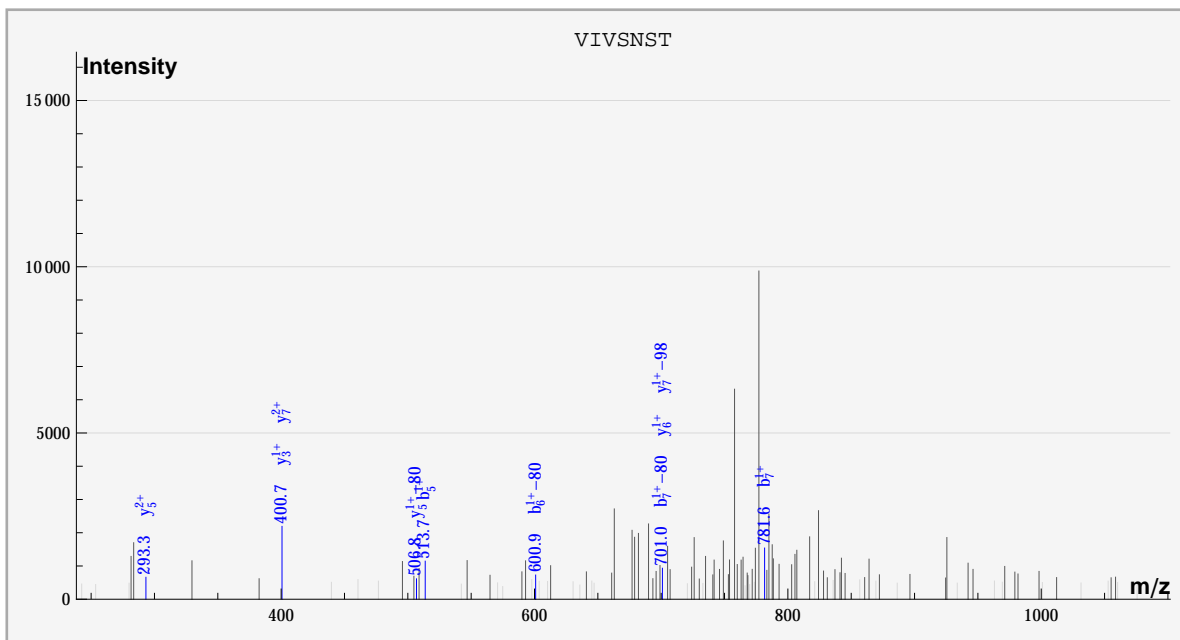

|   | # | b | b* | # | y | y* | P | P* |
|---|---|---|----|---|---|----|---|----|
| V | 1 |   |    |   |   |    | ✓ | ✓  |
| I | 2 |   |    | 6 | ✓ |    |   |    |
| V | 3 |   |    | 5 | ✓ | ✓  |   |    |
| S | 4 |   |    | 4 |   |    |   |    |
| N | 5 | ✓ |    | 3 | ✓ |    |   |    |
| S | 6 |   | ✓  | 2 |   |    |   |    |
| T | 7 | ✓ | ✓  | 1 |   |    |   |    |

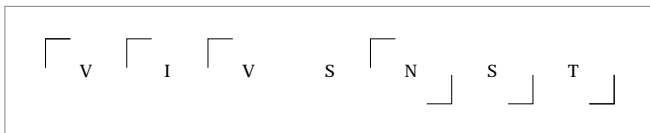

dbValid true YSSLIVLSEGRK PHOS(2) 2. 798. 1.86495 5.5721 100. ? 3468.

S\_Acido\_new%gi|68566535|gb|AA79464.1| YSSLIVLSEGRK::PHOS:PHOS:::sample\_1%compd\_2034

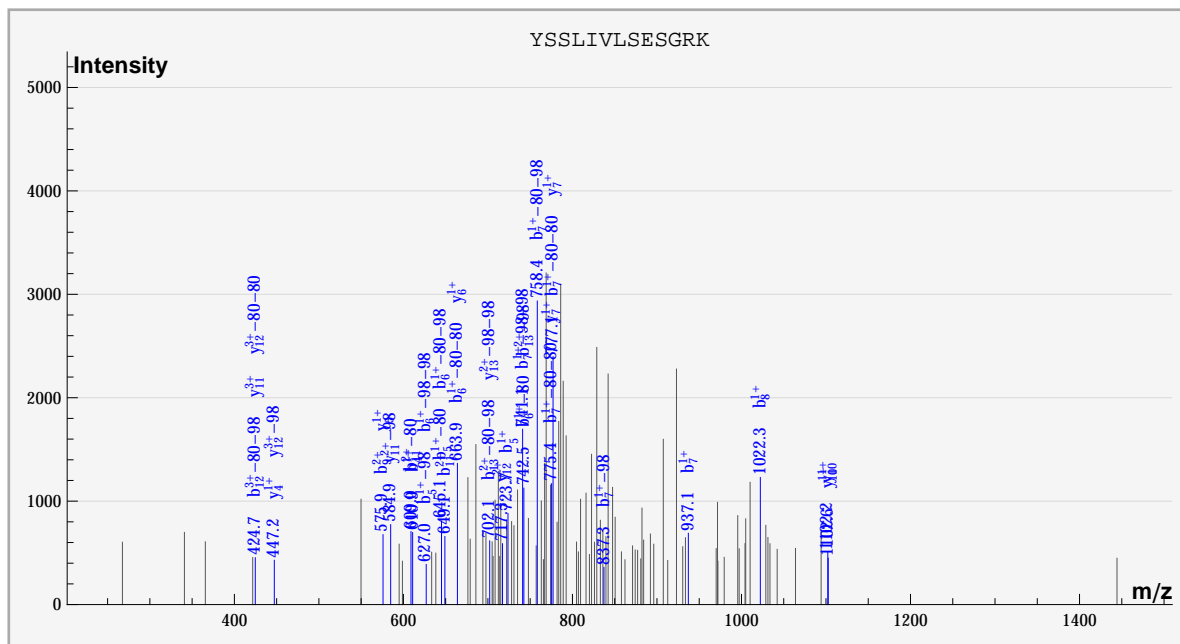

|   | #  | b | b* | #  | y | y* | P | P* |
|---|----|---|----|----|---|----|---|----|
| Y | 1  |   |    |    |   |    |   | ✓  |
| S | 2  |   |    | 12 | ✓ | ✓  |   |    |
| S | 3  |   |    | 11 | ✓ | ✓  |   |    |
| L | 4  | ✓ |    | 10 | ✓ |    |   |    |
| I | 5  | ✓ | ✓  | 9  |   |    |   |    |
| V | 6  |   | ✓  | 8  |   |    |   |    |
| L | 7  | ✓ | ✓  | 7  | ✓ |    |   |    |
| S | 8  | ✓ |    | 6  | ✓ |    |   |    |
| E | 9  | ✓ |    | 5  | ✓ |    |   |    |
| S | 10 |   |    | 4  | ✓ |    |   |    |
| G | 11 | ✓ | ✓  | 3  |   |    |   |    |
| R | 12 |   | ✓  | 2  |   |    |   |    |
| K | 13 |   | ✓  | 1  |   |    |   |    |

Y S S L I V L S E S G R K

dbValid true GEETER PHOS(1) 1. 799. 1.28218 5.13725 100. ? 2568.  
 S\_Acido\_new%gi|68567632|gb|AAY80561.1| GEETER%::::PHOS:::sample\_1%cmpd\_1217

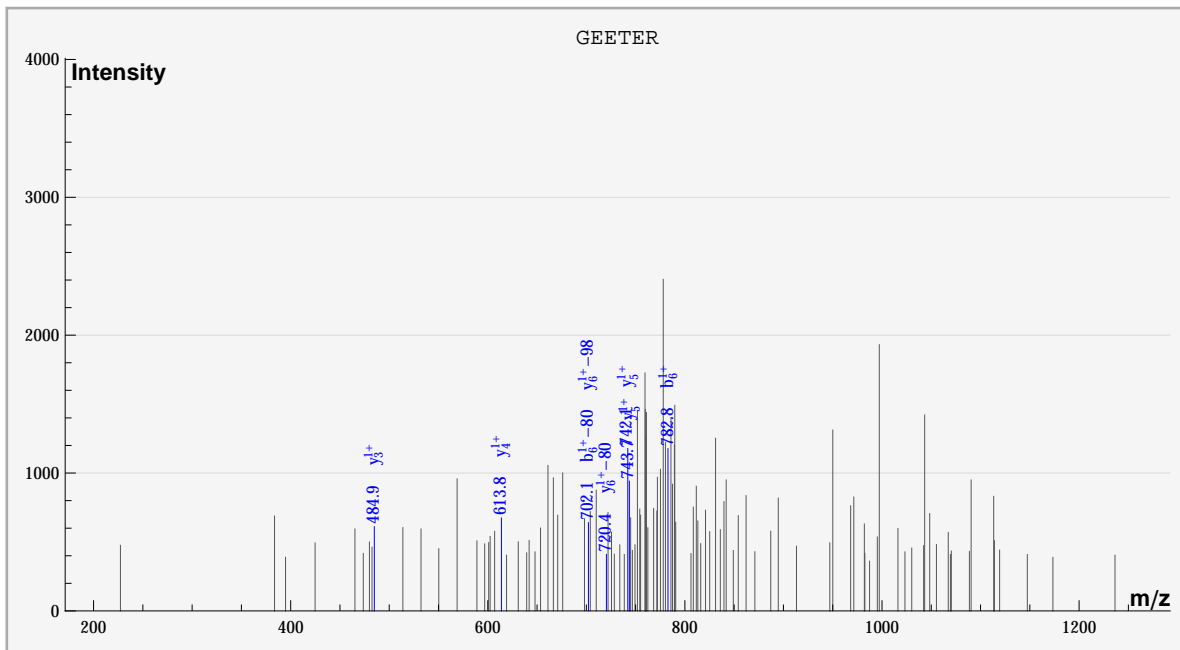

|   | # | b | b* | # | y | y* | P | P* |
|---|---|---|----|---|---|----|---|----|
| G | 1 |   |    |   |   |    |   | ✓  |
| E | 2 |   |    | 5 | ✓ |    |   |    |
| E | 3 |   |    | 4 | ✓ |    |   |    |
| T | 4 |   |    | 3 | ✓ |    |   |    |
| E | 5 |   |    | 2 |   |    |   |    |
| R | 6 | ✓ | ✓  | 1 |   |    |   |    |

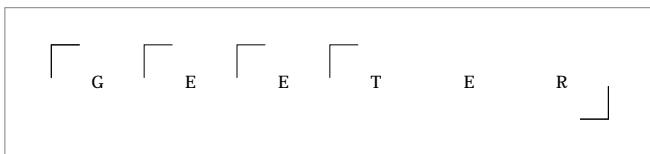

dbValid true VYGIIR PHOS(1) 1. 799. 1.40659 5.34753 100. ? 2652.  
 S\_Acido\_new%gi|68568408|gb|AAY81337.1| VYGIIR%::PHOS::::%sample\_1%cmpd\_1294

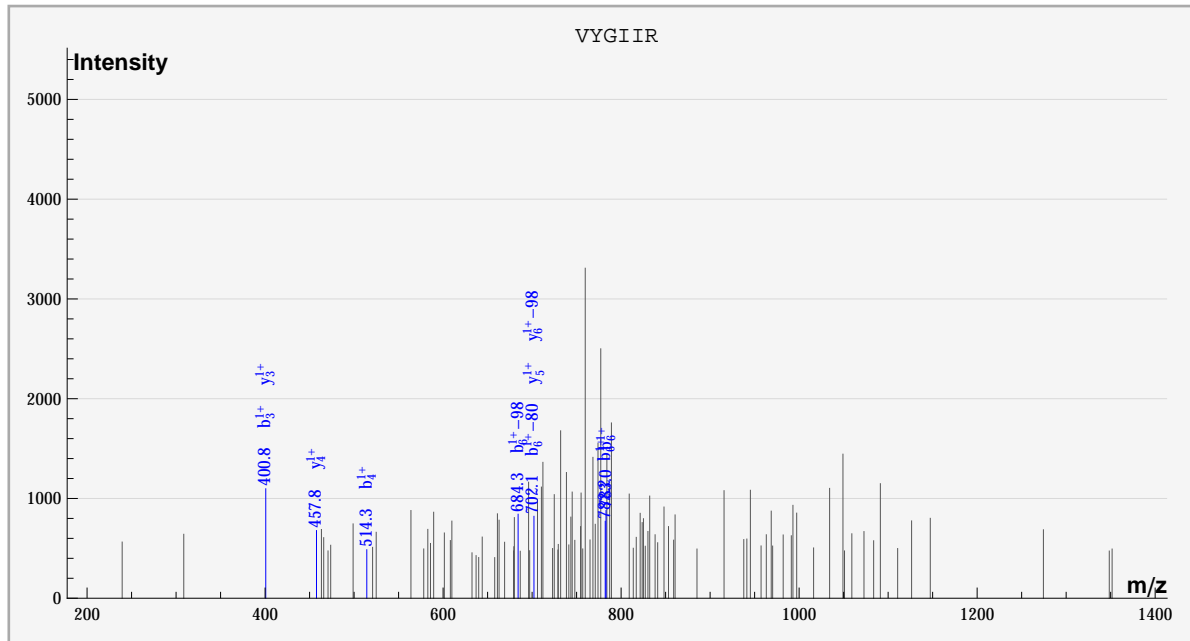

|   | # | b | b* | # | y | y* | P | P* |
|---|---|---|----|---|---|----|---|----|
| V | 1 |   |    |   |   |    |   | ✓  |
| Y | 2 |   |    | 5 | ✓ |    |   |    |
| G | 3 | ✓ |    | 4 | ✓ |    |   |    |
| I | 4 | ✓ |    | 3 | ✓ |    |   |    |
| I | 5 |   |    | 2 |   |    |   |    |
| R | 6 | ✓ | ✓  | 1 |   |    |   |    |

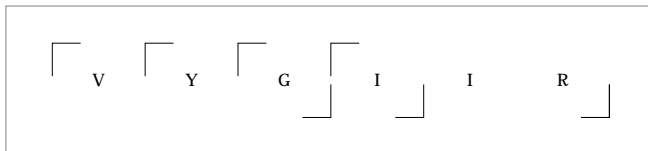

dbValid true IYYVSTASSKR PHOS(4) 2. 799. -1.22679 5.05776 100. ? 2826.

S\_Acido\_new%gi|68567398|gb|AAV80327.1| IYYVSTASSKR%::PHOS::PHOS::PHOS:PHOS::%sample\_0%compd\_1336

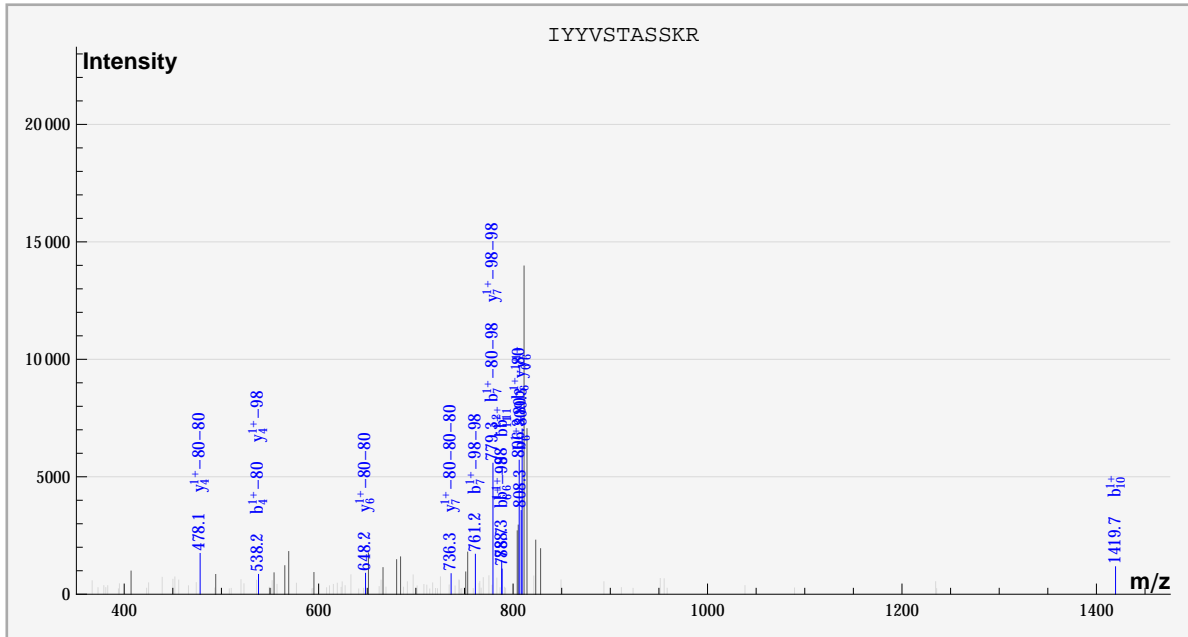

|   | #  | b | b* | #  | y | y* | P | P* |
|---|----|---|----|----|---|----|---|----|
| I | 1  |   |    |    |   |    |   |    |
| Y | 2  |   |    | 10 |   |    |   |    |
| Y | 3  |   |    | 9  |   |    |   |    |
| V | 4  |   | ✓  | 8  |   |    |   |    |
| S | 5  |   |    | 7  |   | ✓  |   |    |
| T | 6  |   | ✓  | 6  | ✓ | ✓  |   |    |
| A | 7  |   | ✓  | 5  |   |    |   |    |
| S | 8  |   |    | 4  |   | ✓  |   |    |
| S | 9  |   |    | 3  |   |    |   |    |
| K | 10 | ✓ |    | 2  |   |    |   |    |
| R | 11 | ✓ |    | 1  |   |    |   |    |

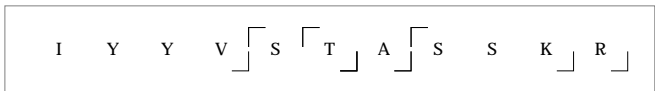

dbValid true IYYVSTASSKR PHOS(4) 2. 799.44 -1.66679 5.08492 100. ? 4776.

S\_Acido\_new%gii68567398|gb|AAy80327.1| IYYVSTASSKR%::PHOS:PHOS::PHOS:::PHOS:::%sample\_1%cmpd\_3537

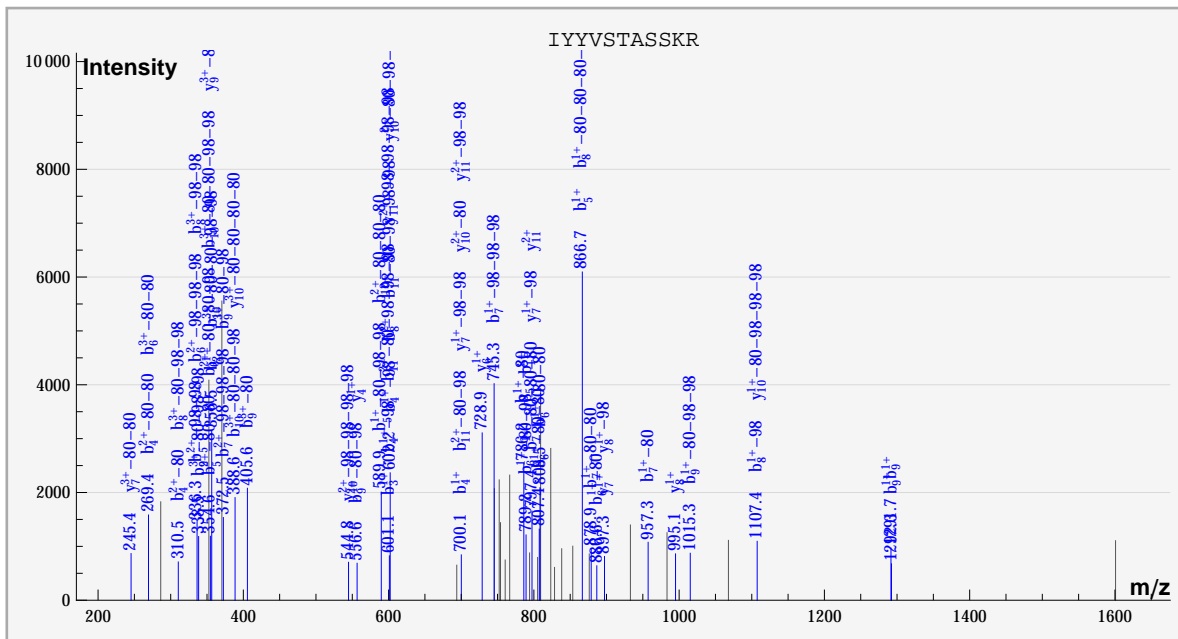

|   | #  | b | b* | #  | y | y* | P | P* |
|---|----|---|----|----|---|----|---|----|
| I | 1  |   |    |    |   |    | ✓ | ✓  |
| Y | 2  | ✓ |    | 10 |   | ✓  |   |    |
| Y | 3  | ✓ |    | 9  |   | ✓  |   |    |
| V | 4  | ✓ | ✓  | 8  | ✓ | ✓  |   |    |
| S | 5  | ✓ | ✓  | 7  | ✓ | ✓  |   |    |
| T | 6  |   | ✓  | 6  | ✓ |    |   |    |
| A | 7  |   | ✓  | 5  |   |    |   |    |
| S | 8  | ✓ | ✓  | 4  | ✓ |    |   |    |
| S | 9  | ✓ | ✓  | 3  |   |    |   |    |
| K | 10 |   | ✓  | 2  |   |    |   |    |
| R | 11 | ✓ | ✓  | 1  |   |    |   |    |

I Y Y V S T A S S K R



dbValid true MSHIKILGIPGSIR PHOS(1) 2. 801. 0.433472 5.10267 100. ? 2664.  
 S\_Acido\_new%gi|68567672|gb|AAY80601.1| MSHIKILGIPGSIR%:.....:PHOS::%sample\_1%compd\_1201

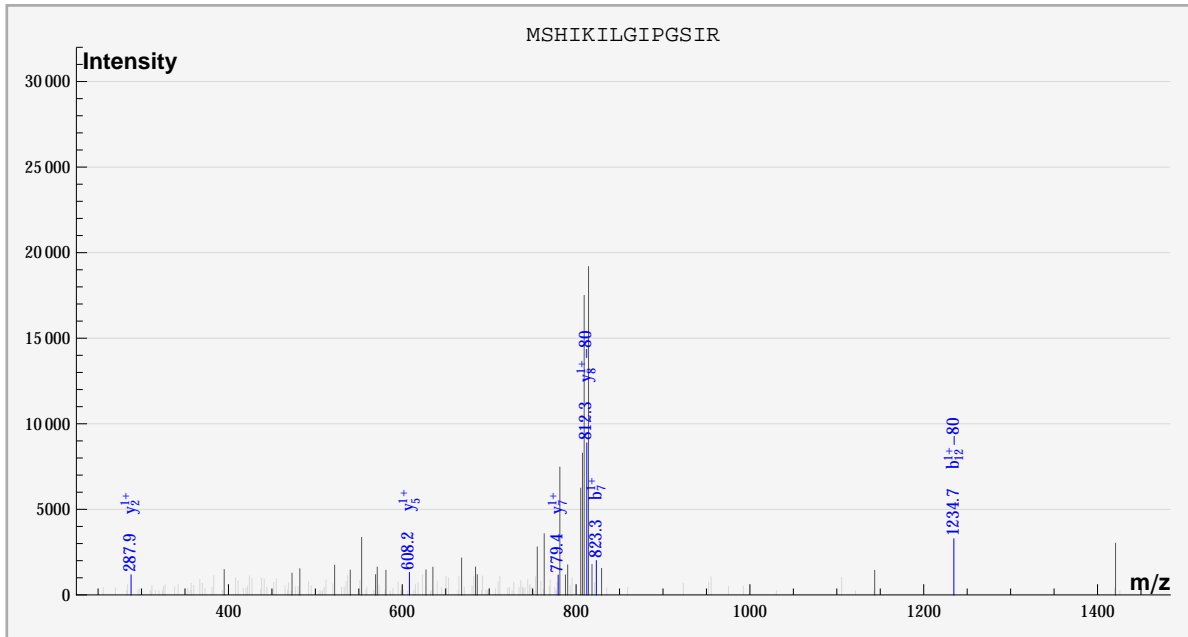

|   | #  | b | b* | #  | y | y* | P | P* |
|---|----|---|----|----|---|----|---|----|
| M | 1  |   |    |    |   |    |   |    |
| S | 2  |   |    | 13 |   |    |   |    |
| H | 3  |   |    | 12 |   |    |   |    |
| I | 4  |   |    | 11 |   |    |   |    |
| K | 5  |   |    | 10 |   |    |   |    |
| I | 6  |   |    | 9  |   |    |   |    |
| L | 7  | ✓ |    | 8  |   | ✓  |   |    |
| G | 8  |   |    | 7  | ✓ |    |   |    |
| I | 9  |   |    | 6  |   |    |   |    |
| P | 10 |   |    | 5  | ✓ |    |   |    |
| G | 11 |   |    | 4  |   |    |   |    |
| S | 12 |   | ✓  | 3  |   |    |   |    |
| I | 13 |   |    | 2  | ✓ |    |   |    |
| R | 14 |   |    | 1  |   |    |   |    |

M S H I K I [ L ] [ G I [ P G S ] ] I R

dbValid true MSHIKILGIPGSIR PHOS(1) 2. 801. 0.433472 5.14043 100. ? 2676.  
 S\_Acido\_new%gi|68567672|gb|AA80601.1| MSHIKILGIPGSIR%:.....:PHOS:::sample\_1%compd\_1211

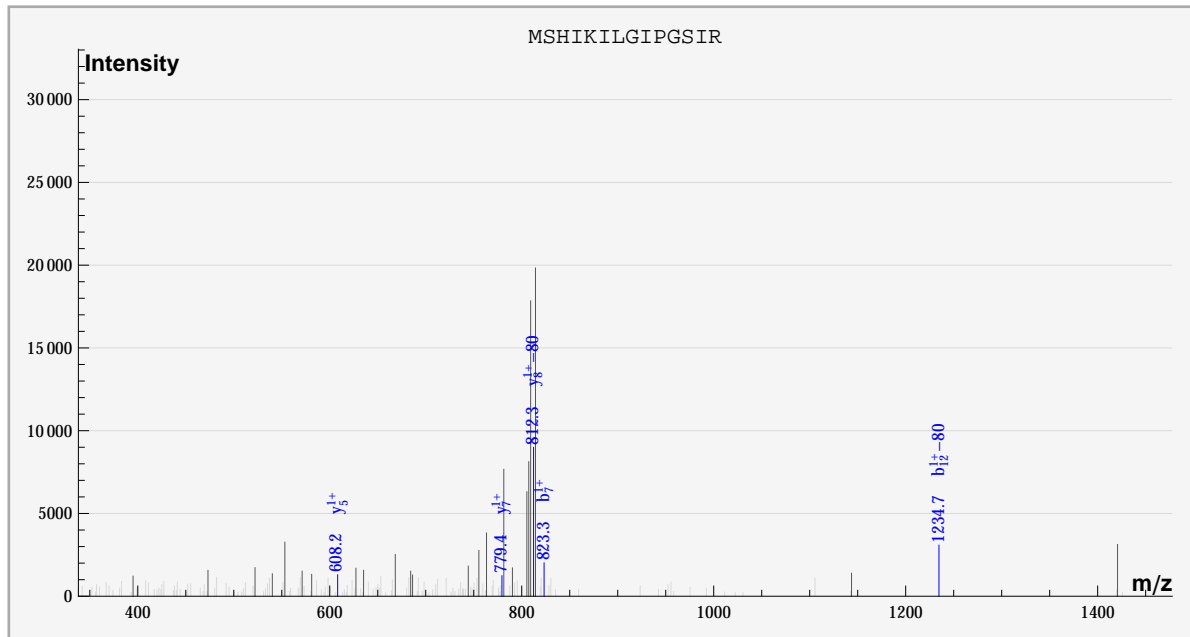

|   | #  | b | b* | #  | y | y* | P | P* |
|---|----|---|----|----|---|----|---|----|
| M | 1  |   |    |    |   |    |   |    |
| S | 2  |   |    | 13 |   |    |   |    |
| H | 3  |   |    | 12 |   |    |   |    |
| I | 4  |   |    | 11 |   |    |   |    |
| K | 5  |   |    | 10 |   |    |   |    |
| I | 6  |   |    | 9  |   |    |   |    |
| L | 7  | ✓ |    | 8  |   | ✓  |   |    |
| G | 8  |   |    | 7  | ✓ |    |   |    |
| I | 9  |   |    | 6  |   |    |   |    |
| P | 10 |   |    | 5  | ✓ |    |   |    |
| G | 11 |   |    | 4  |   |    |   |    |
| S | 12 |   | ✓  | 3  |   |    |   |    |
| I | 13 |   |    | 2  |   |    |   |    |
| R | 14 |   |    | 1  |   |    |   |    |

M S H I K I L G I P G S I R

dbValid true KTALDRVTSQIK PHOS(3) 2. 802. -1.64919 5.83061 100. ? 2892.

S\_Acido\_new%gil68567318|gb|AAY80247.1| KTALDRVTSQIK%::PHOS:::PHOS:PHOS:::sample\_1%cmpd\_1396

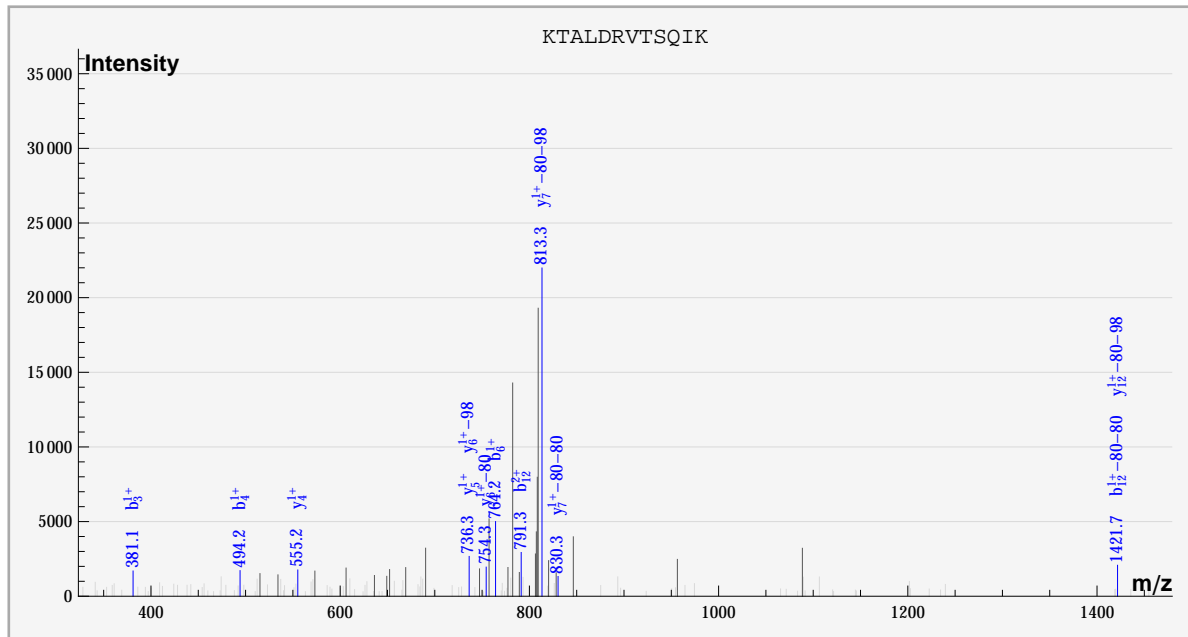

|   | #  | b | b* | #  | y | y* | P | P* |
|---|----|---|----|----|---|----|---|----|
| K | 1  |   |    |    |   |    |   | ✓  |
| T | 2  |   |    | 11 |   |    |   |    |
| A | 3  | ✓ |    | 10 |   |    |   |    |
| L | 4  | ✓ |    | 9  |   |    |   |    |
| D | 5  |   |    | 8  |   |    |   |    |
| R | 6  | ✓ |    | 7  |   | ✓  |   |    |
| V | 7  |   |    | 6  |   | ✓  |   |    |
| T | 8  |   |    | 5  | ✓ |    |   |    |
| S | 9  |   |    | 4  | ✓ |    |   |    |
| Q | 10 |   |    | 3  |   |    |   |    |
| I | 11 |   |    | 2  |   |    |   |    |
| K | 12 | ✓ | ✓  | 1  |   |    |   |    |

「 K T A 」 L 」 D 「 R 」 V 「 T 「 S Q I K 」

dbValid true KTALDRVTSQIK PHOS(3) 2. 802. -1.64919 5.75782 100. ? 2904.  
 S\_Acido\_new%gi|68567318|gb|AA80247.1| KTALDRVTSQIK%::PHOS:::PHOS:PHOS:::sample\_1%compd\_1407

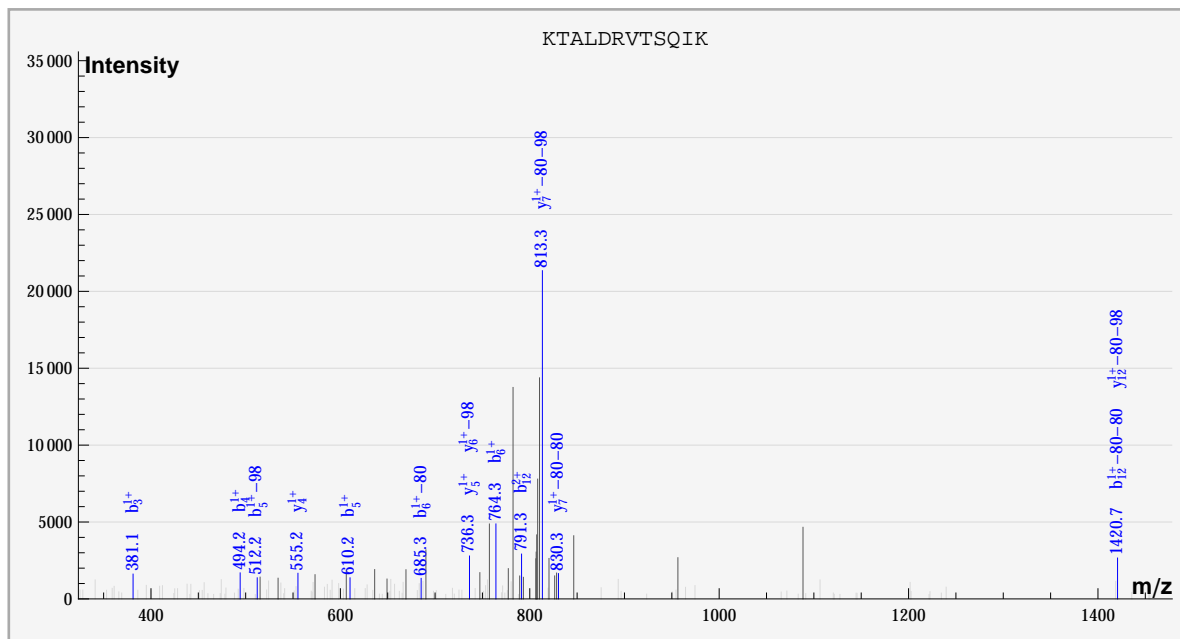

|   | #  | b | b* | #  | y | y* | P | P* |
|---|----|---|----|----|---|----|---|----|
| K | 1  |   |    |    |   |    |   | ✓  |
| T | 2  |   |    | 11 |   |    |   |    |
| A | 3  | ✓ |    | 10 |   |    |   |    |
| L | 4  | ✓ |    | 9  |   |    |   |    |
| D | 5  | ✓ | ✓  | 8  |   |    |   |    |
| R | 6  | ✓ | ✓  | 7  |   | ✓  |   |    |
| V | 7  |   |    | 6  |   | ✓  |   |    |
| T | 8  |   |    | 5  | ✓ |    |   |    |
| S | 9  |   |    | 4  | ✓ |    |   |    |
| Q | 10 |   |    | 3  |   |    |   |    |
| I | 11 |   |    | 2  |   |    |   |    |
| K | 12 | ✓ | ✓  | 1  |   |    |   |    |

「 K T A 」 L 」 D 」 R 「 V 「 T 「 S Q I K 」

dbValid true KTALDRVTSQIK PHOS(3) 2. 802. -1.64919 5.4489 100. ? 2952.

S\_Acido\_new%gil68567318|gb|AAY80247.1| KTALDRVTSQIK%::PHOS:::PHOS:PHOS:::sample\_1%compd\_1448

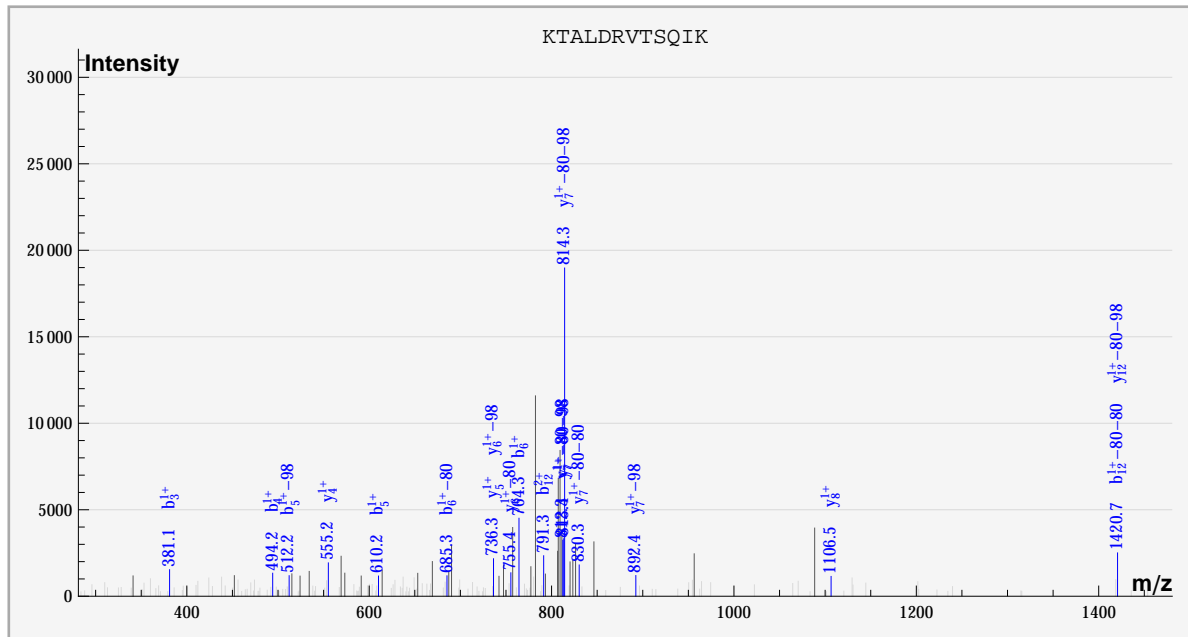

|   | #  | b | b* | #  | y | y* | P | P* |
|---|----|---|----|----|---|----|---|----|
| K | 1  |   |    |    |   |    |   | ✓  |
| T | 2  |   |    | 11 |   |    |   |    |
| A | 3  | ✓ |    | 10 |   |    |   |    |
| L | 4  | ✓ |    | 9  |   |    |   |    |
| D | 5  | ✓ | ✓  | 8  | ✓ |    |   |    |
| R | 6  | ✓ | ✓  | 7  |   | ✓  |   |    |
| V | 7  |   |    | 6  |   | ✓  |   |    |
| T | 8  |   |    | 5  | ✓ |    |   |    |
| S | 9  |   |    | 4  | ✓ |    |   |    |
| Q | 10 |   |    | 3  |   |    |   |    |
| I | 11 |   |    | 2  |   |    |   |    |
| K | 12 | ✓ | ✓  | 1  |   |    |   |    |

[ K T A ] L [ D ] R [ V ] T [ S Q I K ]

dbValid true ELKLSSQEIQKR PHOS(2) 2. 811. -1.11633 5.35138 100. ? 2592.

S\_Acido\_new%gi|68567066|gb|AAY79995.1| ELKLSSQEIQKR%::::PHOS:PHOS:::::sample\_2%cmpd\_1125

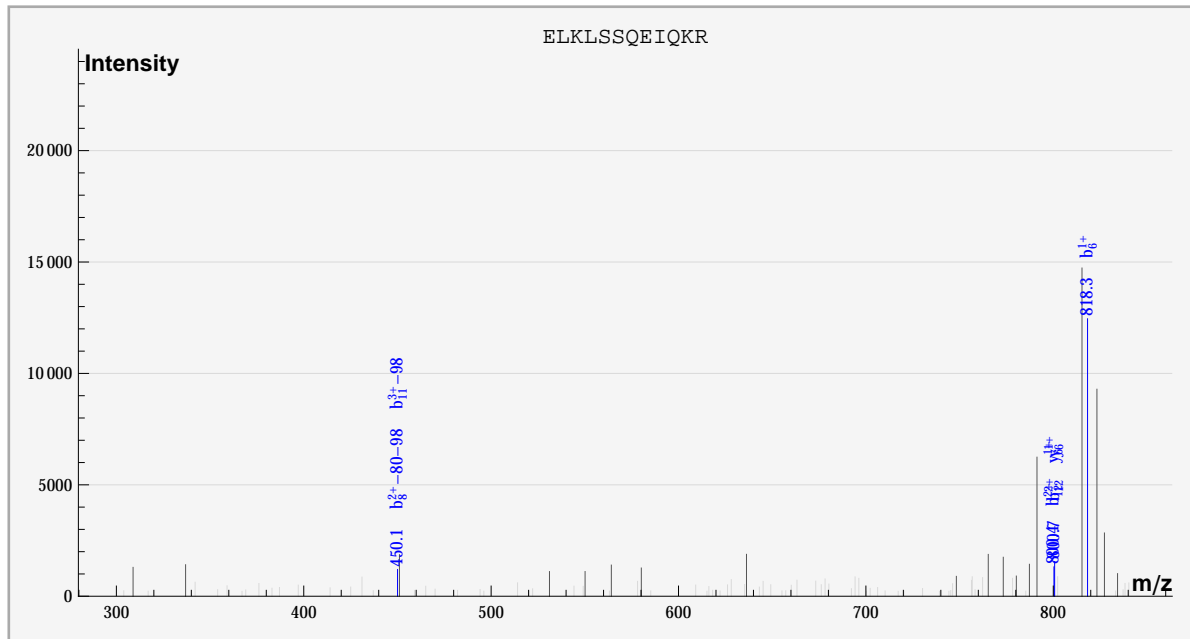

|   | #  | b | b* | #  | y | y* | P | P* |
|---|----|---|----|----|---|----|---|----|
| E | 1  |   |    |    |   |    |   |    |
| L | 2  |   |    | 11 |   |    |   |    |
| K | 3  |   |    | 10 |   |    |   |    |
| L | 4  |   |    | 9  |   |    |   |    |
| S | 5  |   |    | 8  |   |    |   |    |
| S | 6  | ✓ |    | 7  |   |    |   |    |
| Q | 7  |   |    | 6  | ✓ |    |   |    |
| E | 8  |   | ✓  | 5  |   |    |   |    |
| I | 9  |   |    | 4  |   |    |   |    |
| Q | 10 |   |    | 3  |   |    |   |    |
| K | 11 |   | ✓  | 2  |   |    |   |    |
| R | 12 | ✓ |    | 1  |   |    |   |    |

E L K L S S Q E I Q K R

dbValid true ELKLSSQEIQKR PHOS(2) 2. 811. -1.11633 5.63517 100. ? 2604.

S\_Acido\_new%gi|68567066|gb|AA79995.1| ELKLSSQEIQKR%::::PHOS:PHOS:::::sample\_2%cmpd\_1135

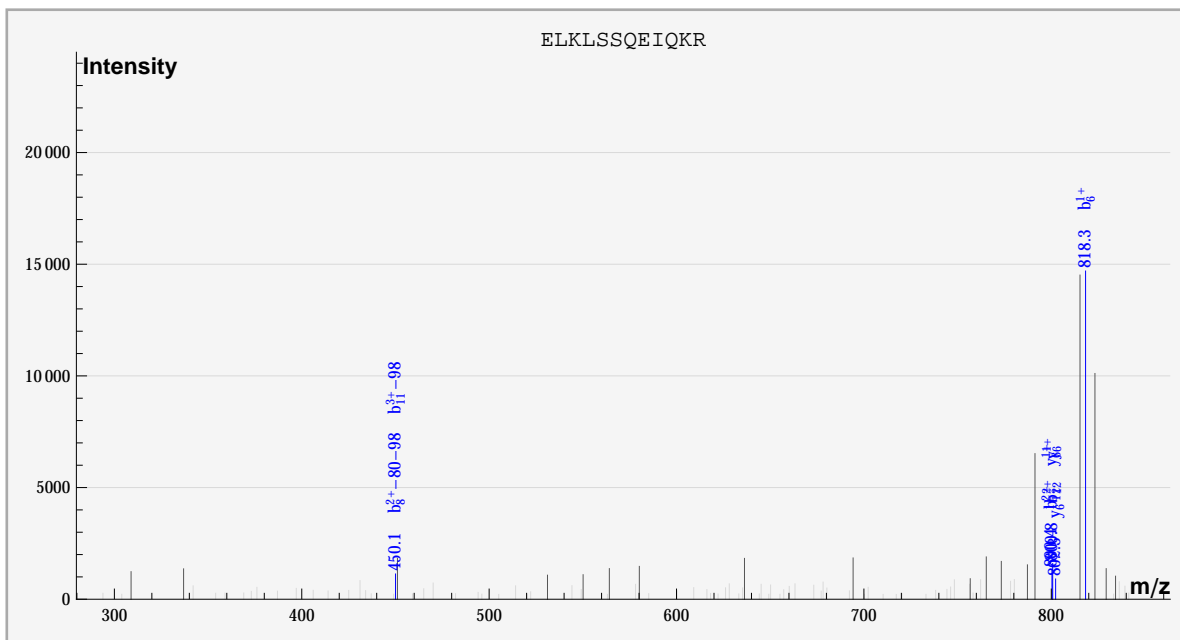

|   | #  | b | b* | #  | y | y* | P | P* |
|---|----|---|----|----|---|----|---|----|
| E | 1  |   |    |    |   |    |   |    |
| L | 2  |   |    | 11 |   |    |   |    |
| K | 3  |   |    | 10 |   |    |   |    |
| L | 4  |   |    | 9  |   |    |   |    |
| S | 5  |   |    | 8  |   |    |   |    |
| S | 6  | ✓ |    | 7  |   |    |   |    |
| Q | 7  |   |    | 6  | ✓ |    |   |    |
| E | 8  |   | ✓  | 5  |   |    |   |    |
| I | 9  |   |    | 4  |   |    |   |    |
| Q | 10 |   |    | 3  |   |    |   |    |
| K | 11 |   | ✓  | 2  |   |    |   |    |
| R | 12 | ✓ |    | 1  |   |    |   |    |

E L K L S S Q E I Q K R

dbValid true VIIAGTR PHOS(1) 1. 811. -1.57196 5.11445 100. ? 3318.  
 S\_Acido\_new%gi|68567014|gb|AAY79943.1| VIIAGTR%:::::PHOS::%sample\_1%compd\_1884

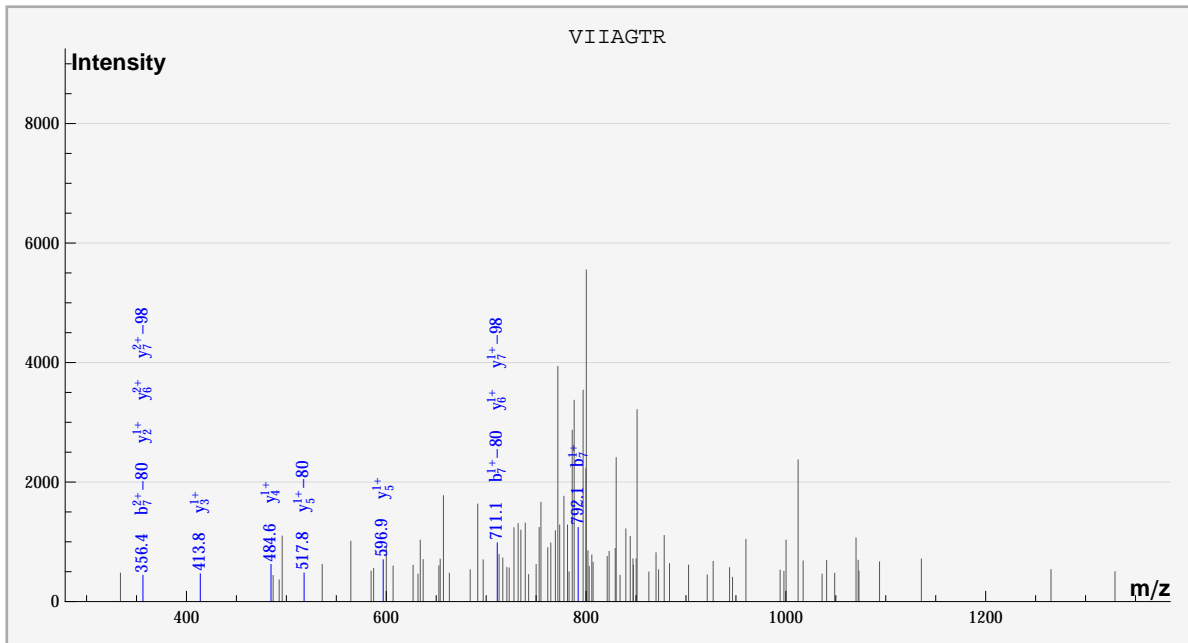

|   | # | b | b* | # | y | y* | P | P* |
|---|---|---|----|---|---|----|---|----|
| V | 1 |   |    |   |   |    |   | ✓  |
| I | 2 |   |    | 6 | ✓ |    |   |    |
| I | 3 |   |    | 5 | ✓ | ✓  |   |    |
| A | 4 |   |    | 4 | ✓ |    |   |    |
| G | 5 |   |    | 3 | ✓ |    |   |    |
| T | 6 |   |    | 2 | ✓ |    |   |    |
| R | 7 | ✓ | ✓  | 1 |   |    |   |    |

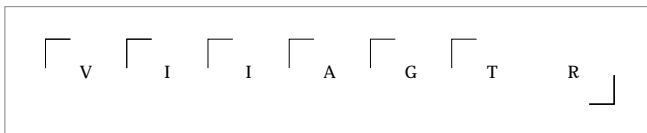



dbValid true NSTSVVLGVLRSVK PHOS(2) 2. 811. -1.09814 5.12852 100. ? 3708.

S\_Acido\_new%gi|68566794|gb|AAAY79723.1| NSTSVVLGVLRSVK%::PHOS:::PHOS:::sample\_1%compd\_2239

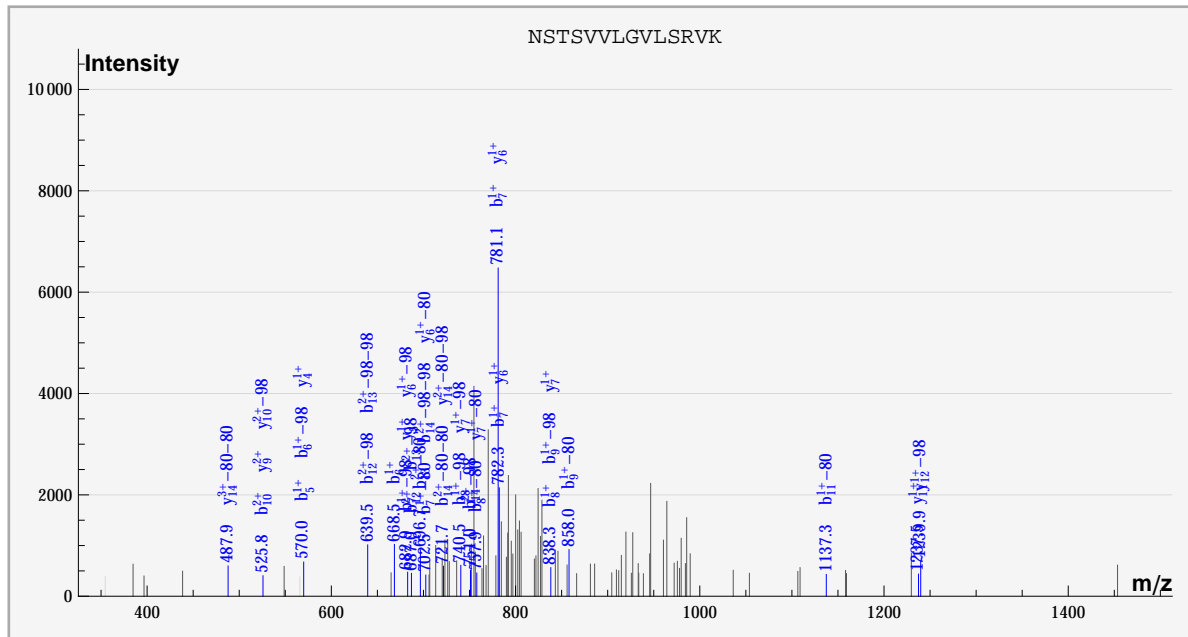

|   | #  | b | b* | #  | y | y* | P | P* |
|---|----|---|----|----|---|----|---|----|
| N | 1  |   |    |    |   |    |   | ✓  |
| S | 2  |   |    | 13 |   |    |   |    |
| T | 3  |   |    | 12 |   | ✓  |   |    |
| S | 4  |   |    | 11 | ✓ | ✓  |   |    |
| V | 5  | ✓ |    | 10 |   | ✓  |   |    |
| V | 6  | ✓ | ✓  | 9  | ✓ | ✓  |   |    |
| L | 7  | ✓ | ✓  | 8  |   |    |   |    |
| G | 8  | ✓ | ✓  | 7  | ✓ | ✓  |   |    |
| V | 9  |   | ✓  | 6  | ✓ | ✓  |   |    |
| L | 10 | ✓ |    | 5  | ✓ | ✓  |   |    |
| S | 11 |   | ✓  | 4  | ✓ |    |   |    |
| R | 12 | ✓ | ✓  | 3  |   |    |   |    |
| V | 13 |   | ✓  | 2  |   |    |   |    |
| K | 14 |   | ✓  | 1  |   |    |   |    |

「N S 「T 「S 「V」V」L」G」V」L」S」R」V」K」

dbValid true TLTYNQVLYESK PHOS(2) 2. 811.14 -1.29631 5.86472 100. ? 2448.  
 S\_Acido\_new%gil68568655|gb|AAY81584.1| TLTYNQVLYESK%:::PHOS::PHOS::%sample\_1%compd\_1119

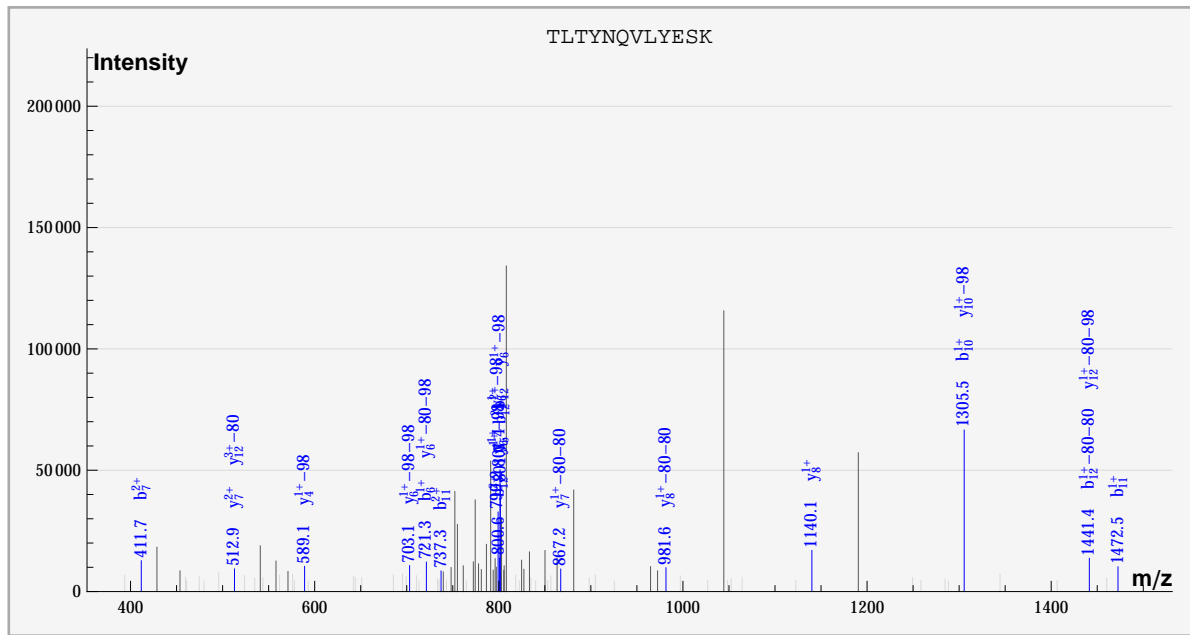

|   | #  | b | b* | #  | y | y* | P | P* |
|---|----|---|----|----|---|----|---|----|
| T | 1  |   |    |    |   |    |   | ✓  |
| L | 2  |   |    | 11 |   |    |   |    |
| T | 3  |   |    | 10 |   | ✓  |   |    |
| Y | 4  |   |    | 9  |   | ✓  |   |    |
| N | 5  |   |    | 8  | ✓ | ✓  |   |    |
| Q | 6  | ✓ |    | 7  | ✓ | ✓  |   |    |
| V | 7  | ✓ |    | 6  |   | ✓  |   |    |
| L | 8  |   |    | 5  | ✓ |    |   |    |
| Y | 9  |   |    | 4  |   | ✓  |   |    |
| E | 10 | ✓ |    | 3  |   |    |   |    |
| S | 11 | ✓ |    | 2  |   |    |   |    |
| K | 12 | ✓ | ✓  | 1  |   |    |   |    |

「 T L 「 T Y 「 N 「 Q 「 V 「 L 「 Y E 」 S 」 K 」

dbValid true DIIKSR PHOS(1) 1. 812. -0.592685 5.18152 100. ? 2496.  
 S\_Acido\_new%gi|68566750|gb|AAY79679.1| DIIKSR%::::PHOS::%sample\_1%cmpd\_1130

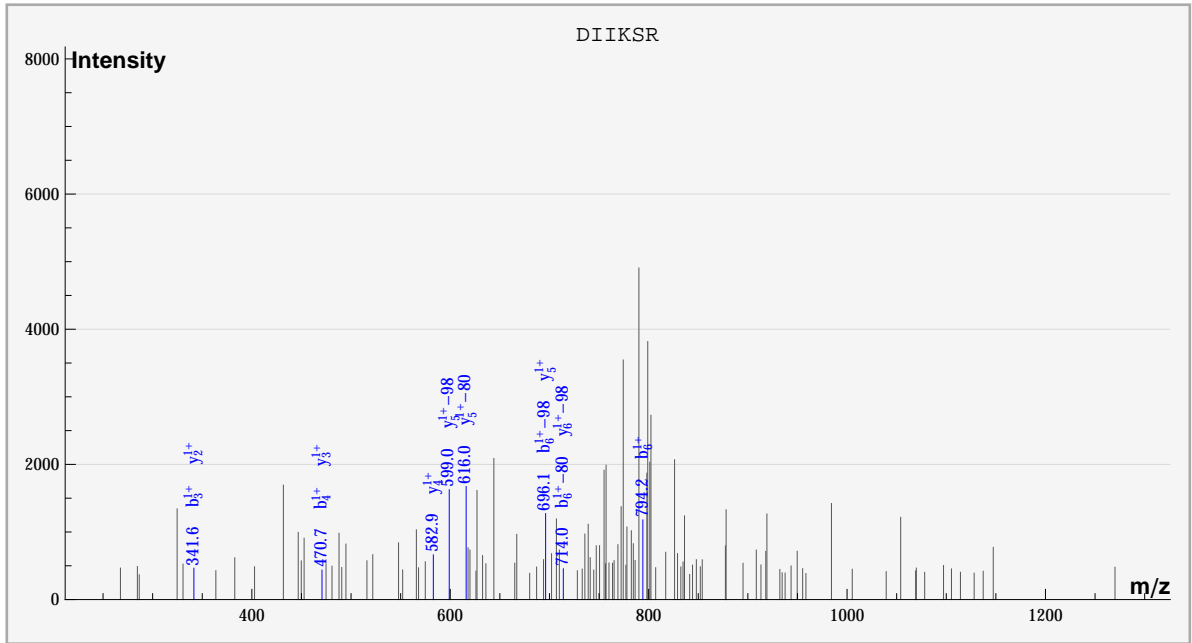

|   | # | b | b* | # | y | y* | P | P* |
|---|---|---|----|---|---|----|---|----|
| D | 1 |   |    |   |   |    |   | ✓  |
| I | 2 |   |    | 5 | ✓ | ✓  |   |    |
| I | 3 | ✓ |    | 4 | ✓ |    |   |    |
| K | 4 | ✓ |    | 3 | ✓ |    |   |    |
| S | 5 |   |    | 2 | ✓ |    |   |    |
| R | 6 | ✓ | ✓  | 1 |   |    |   |    |

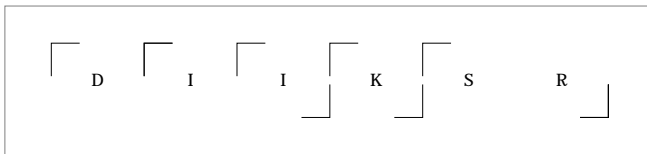

dbValid true VGASLKR PHOS(1) 1. 812. -1.57671 6.18272 100. ? 3234.  
 S\_Acido\_new%gi|68568649|gb|AAY81578.1| VGASLKR%::::PHOS::::%sample\_1%compd\_1807

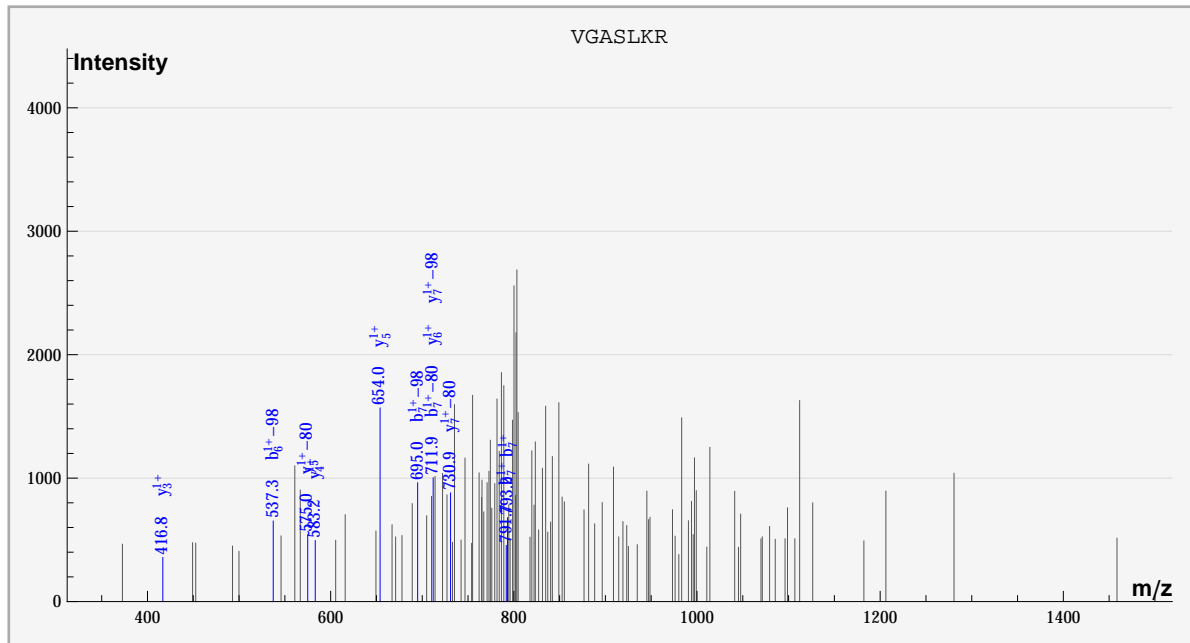

|   | # | b | b* | # | y | y* | P | P* |
|---|---|---|----|---|---|----|---|----|
| V | 1 |   |    |   |   |    |   | ✓  |
| G | 2 |   |    | 6 | ✓ |    |   |    |
| A | 3 |   |    | 5 | ✓ | ✓  |   |    |
| S | 4 |   |    | 4 | ✓ |    |   |    |
| L | 5 |   |    | 3 | ✓ |    |   |    |
| K | 6 | ✓ | ✓  | 2 |   |    |   |    |
| R | 7 | ✓ | ✓  | 1 |   |    |   |    |

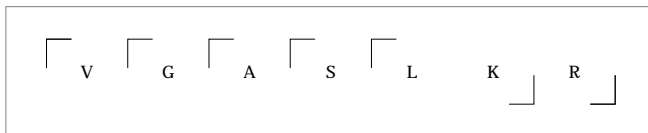

dbValid true LSILASK PHOS(1) 1. 813. -1.56754 5.55237 100. ? 1596.  
 S\_Acido\_new%gi|68567478|gb|AAY80407.1| LSILASK%:::PHOS::%sample\_2%compd\_288

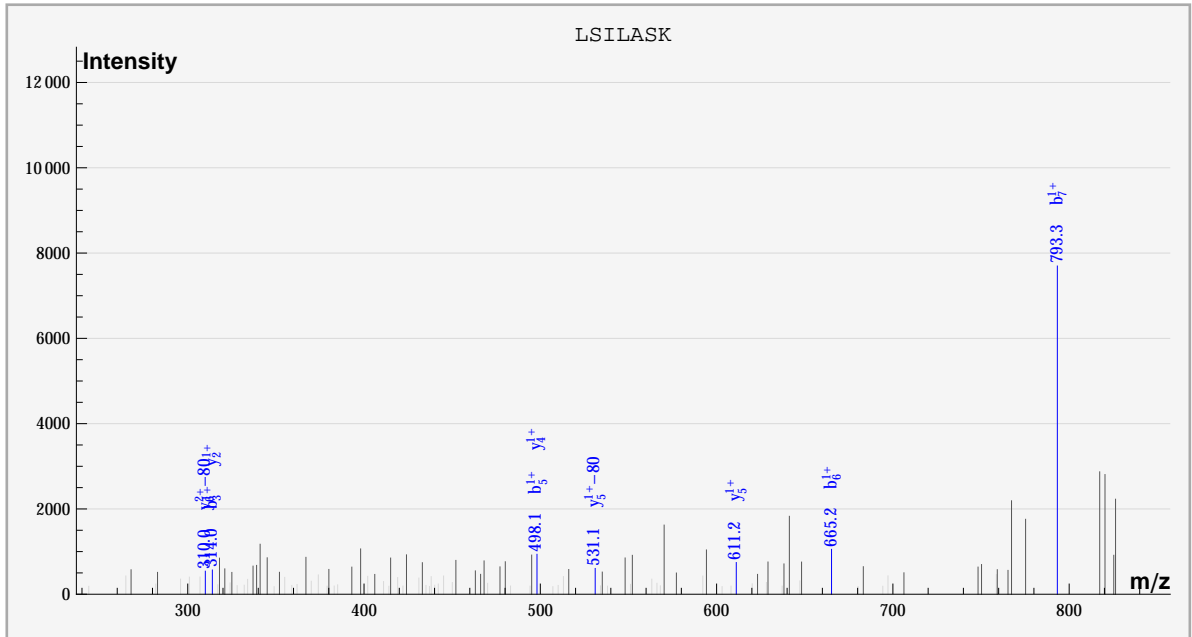

|   | # | b | b* | # | y | y* | P | P* |
|---|---|---|----|---|---|----|---|----|
| L | 1 |   |    |   |   |    |   |    |
| S | 2 |   |    | 6 |   | ✓  |   |    |
| I | 3 | ✓ |    | 5 | ✓ | ✓  |   |    |
| L | 4 |   |    | 4 | ✓ |    |   |    |
| A | 5 | ✓ |    | 3 |   |    |   |    |
| S | 6 | ✓ |    | 2 | ✓ |    |   |    |
| K | 7 | ✓ |    | 1 |   |    |   |    |

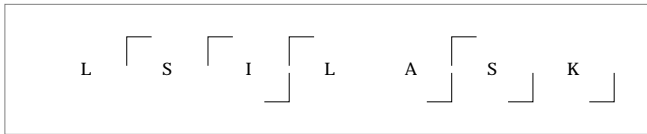

dbValid true LSILASK PHOS(1) 1. 813. -1.56754 5.43883 100. ? 1608.  
 S\_Acido\_new%gi|68567478|gb|AAY80407.1| LSILASK%:::PHOS::%sample\_2%compd\_298

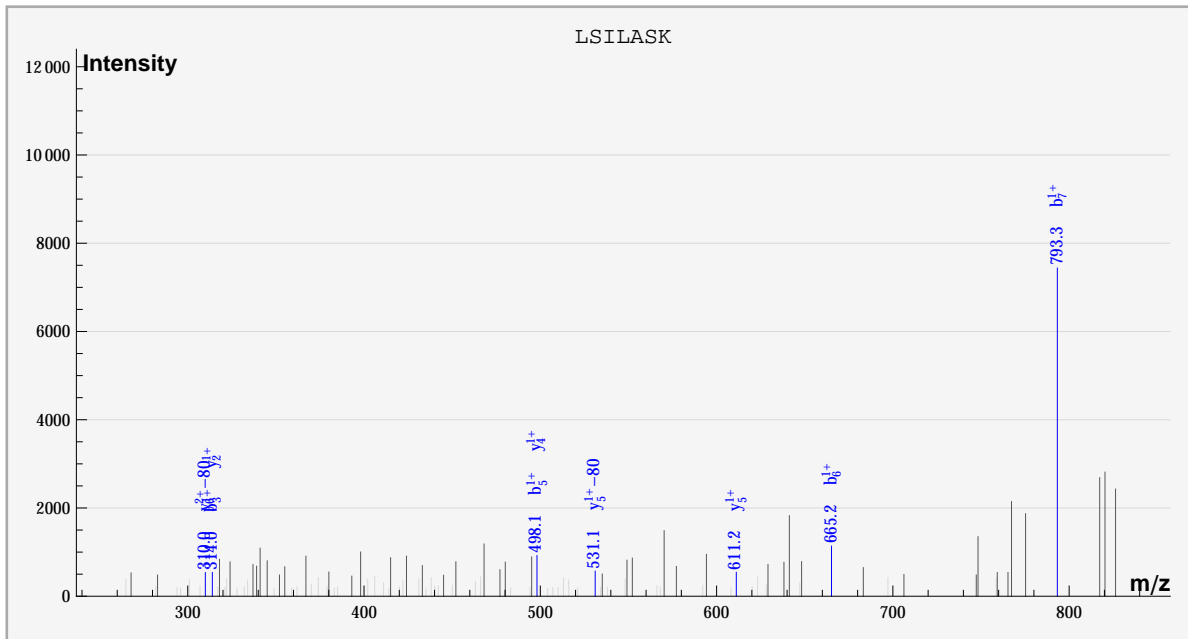

|   | # | b | b* | # | y | y* | P | P* |
|---|---|---|----|---|---|----|---|----|
| L | 1 |   |    |   |   |    |   |    |
| S | 2 |   |    | 6 |   | ✓  |   |    |
| I | 3 | ✓ |    | 5 | ✓ | ✓  |   |    |
| L | 4 |   |    | 4 | ✓ |    |   |    |
| A | 5 | ✓ |    | 3 |   |    |   |    |
| S | 6 | ✓ |    | 2 | ✓ |    |   |    |
| K | 7 | ✓ |    | 1 |   |    |   |    |

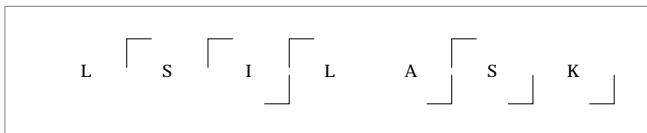

dbValid true LSILASK PHOS(1) 1. 813. -1.56754 5.18537 100. ? 1620.  
 S\_Acido\_new%gi|68567478|gb|AAY80407.1| LSILASK%:::PHOS::%sample\_2%compd\_308

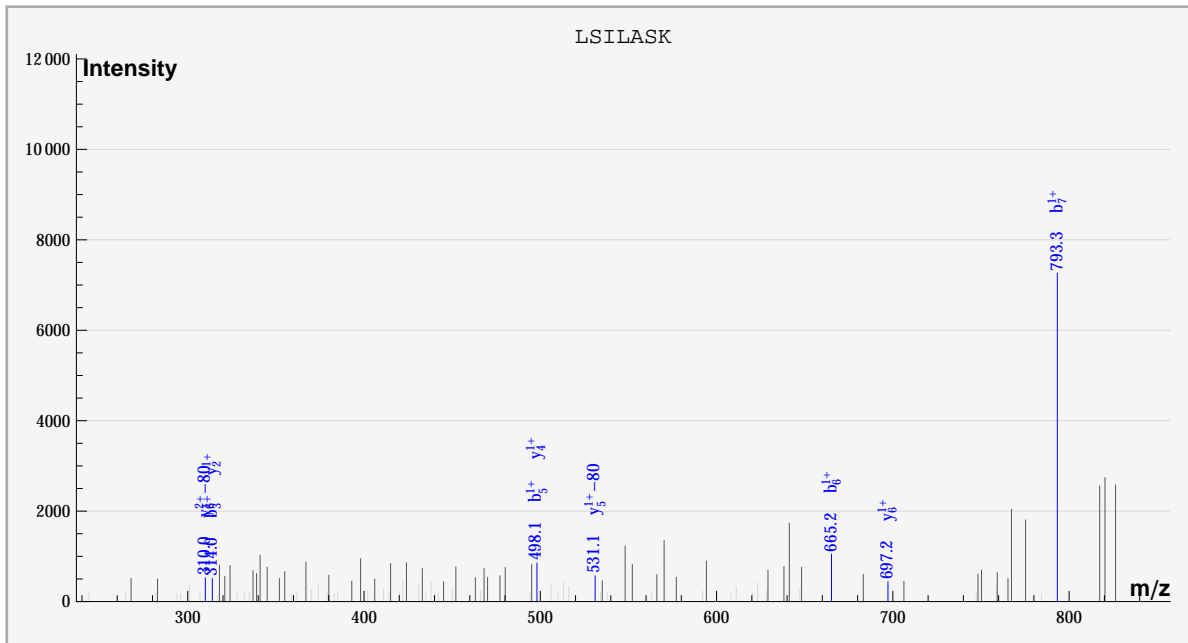

|   | # | b | b* | # | y | y* | P | P* |
|---|---|---|----|---|---|----|---|----|
| L | 1 |   |    |   |   |    |   |    |
| S | 2 |   |    | 6 | ✓ | ✓  |   |    |
| I | 3 | ✓ |    | 5 |   | ✓  |   |    |
| L | 4 |   |    | 4 | ✓ |    |   |    |
| A | 5 | ✓ |    | 3 |   |    |   |    |
| S | 6 | ✓ |    | 2 |   | ✓  |   |    |
| K | 7 | ✓ |    | 1 |   |    |   |    |

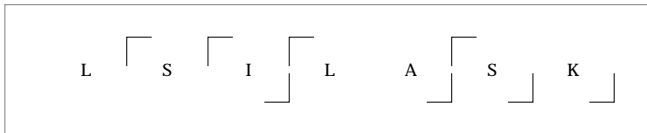

dbValid true LSILASK PHOS(1) 1. 813. -1.56754 5.40663 100. ? 1632.  
 S\_Acido\_new%gi68567478|gb|AAY80407.1| LSILASK%:::PHOS::%sample\_2%compd\_318

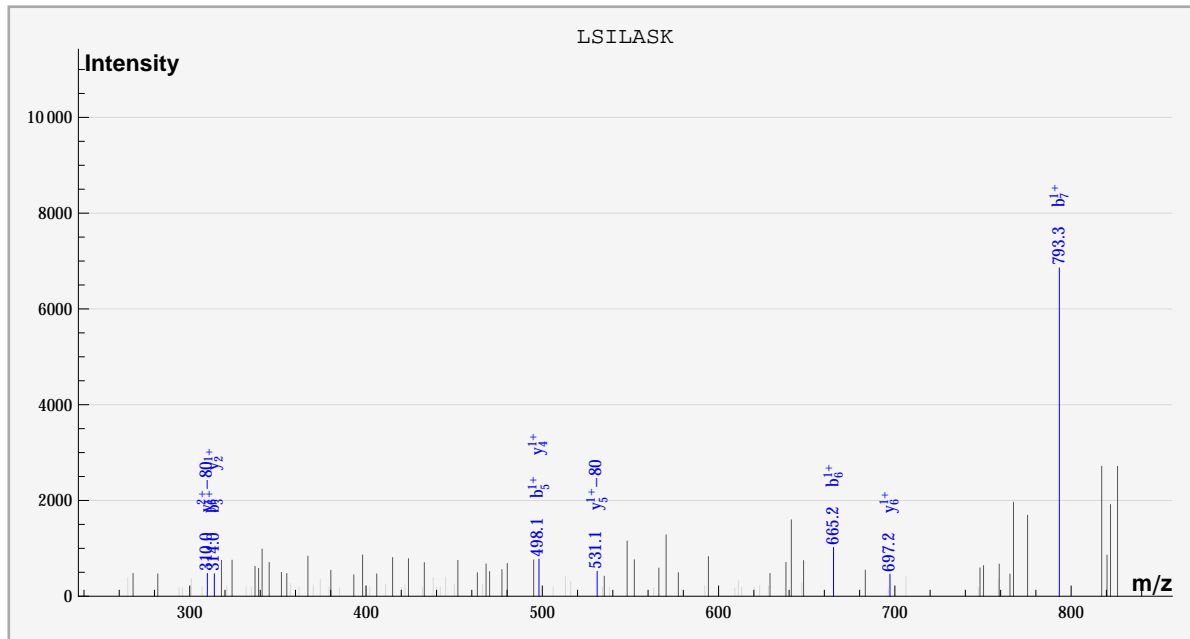

|   | # | b | b* | # | y | y* | P | P* |
|---|---|---|----|---|---|----|---|----|
| L | 1 |   |    |   |   |    |   |    |
| S | 2 |   |    | 6 | ✓ | ✓  |   |    |
| I | 3 | ✓ |    | 5 |   | ✓  |   |    |
| L | 4 |   |    | 4 | ✓ |    |   |    |
| A | 5 | ✓ |    | 3 |   |    |   |    |
| S | 6 | ✓ |    | 2 |   | ✓  |   |    |
| K | 7 | ✓ |    | 1 |   |    |   |    |

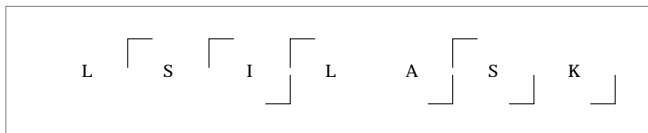



dbValid true GKYNLYKYSQER PHOS(1) 2. 814. 0.877052 5.47365 100. ? 1830.  
 S\_Acido\_new%gii68568256|gb|AAY81185.1| GKYNLYKYSQER%:::PHOS:::sample\_1%compd\_520

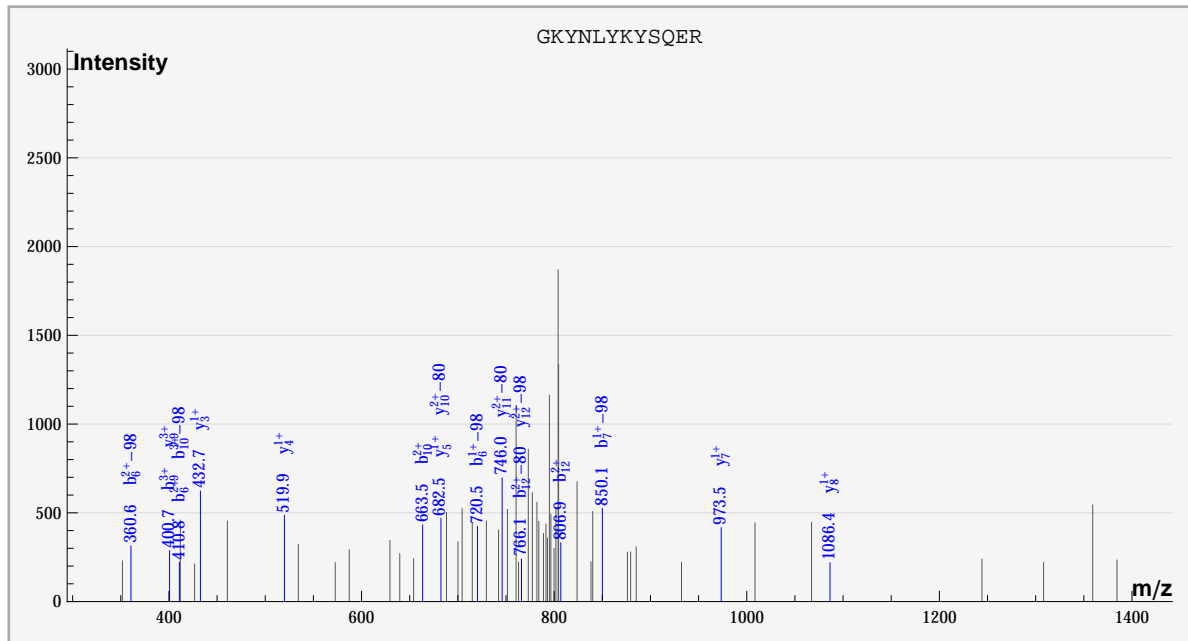

|   | #  | b | b* | #  | y | y* | P | P* |
|---|----|---|----|----|---|----|---|----|
| G | 1  |   |    |    |   |    |   | ✓  |
| K | 2  |   |    | 11 |   | ✓  |   |    |
| Y | 3  |   |    | 10 |   | ✓  |   |    |
| N | 4  |   |    | 9  | ✓ |    |   |    |
| L | 5  |   |    | 8  | ✓ |    |   |    |
| Y | 6  | ✓ | ✓  | 7  | ✓ |    |   |    |
| K | 7  |   | ✓  | 6  |   |    |   |    |
| Y | 8  |   |    | 5  | ✓ |    |   |    |
| S | 9  | ✓ |    | 4  | ✓ |    |   |    |
| Q | 10 | ✓ | ✓  | 3  | ✓ |    |   |    |
| E | 11 |   |    | 2  |   |    |   |    |
| R | 12 | ✓ | ✓  | 1  |   |    |   |    |

G K Y N L Y K Y S Q E R

dbValid true YLKSIIVNVTKPK PHOS(3) 2. 814. 1.37629 5.66091 100. ? 1938.

S\_Acido\_new%gi|68567982|gb|AAy80911.1| YLKSIIVNVTKPK%:PHOS:::PHOS:::PHOS:::sample\_1%compd\_620

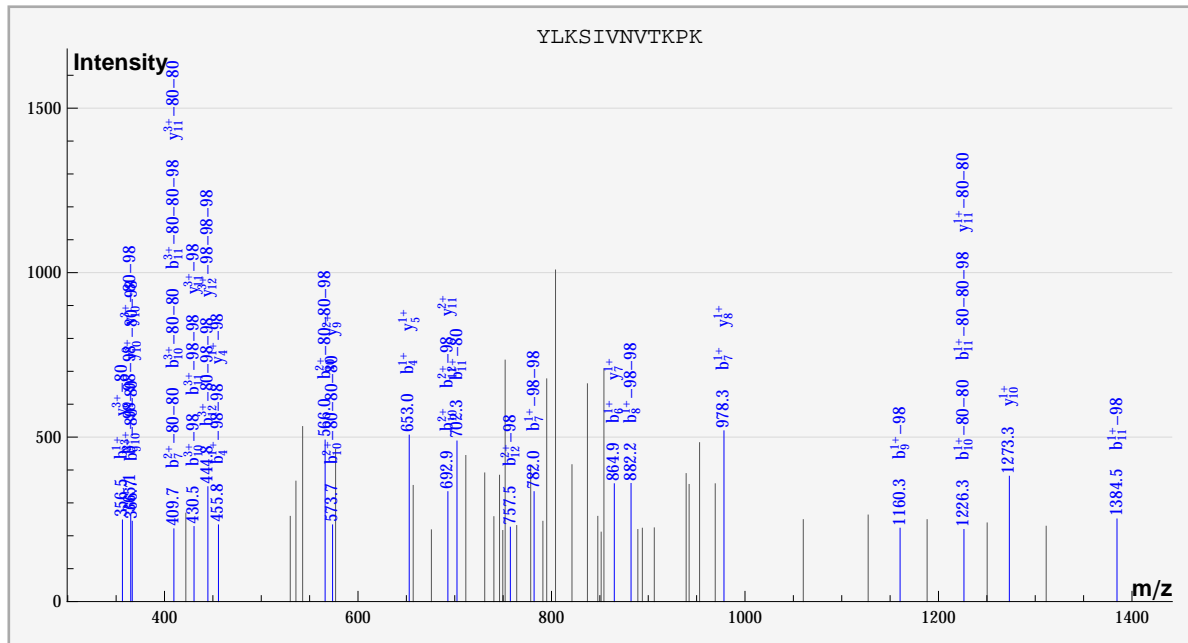

|   | #  | b | b* | #  | y | y* | P | P* |
|---|----|---|----|----|---|----|---|----|
| Y | 1  |   |    |    |   |    |   | ✓  |
| L | 2  | ✓ |    | 11 | ✓ | ✓  |   |    |
| K | 3  |   |    | 10 | ✓ | ✓  |   |    |
| S | 4  | ✓ | ✓  | 9  | ✓ | ✓  |   |    |
| I | 5  |   |    | 8  | ✓ |    |   |    |
| V | 6  | ✓ |    | 7  | ✓ |    |   |    |
| N | 7  | ✓ | ✓  | 6  |   |    |   |    |
| V | 8  |   | ✓  | 5  | ✓ |    |   |    |
| T | 9  |   | ✓  | 4  |   | ✓  |   |    |
| K | 10 | ✓ | ✓  | 3  |   |    |   |    |
| P | 11 |   | ✓  | 2  |   |    |   |    |
| K | 12 |   | ✓  | 1  |   |    |   |    |

Y L K S I V N V T K P K

dbValid true IPYPVSG PHOS(1) 1. 814. -1.64104 6.21365 100. ? 2664.

S\_Acido\_new%gi|68568416|gb|AAY81345.1| IPYPVSG%:::::PHOS::%sample\_1%compd\_1287

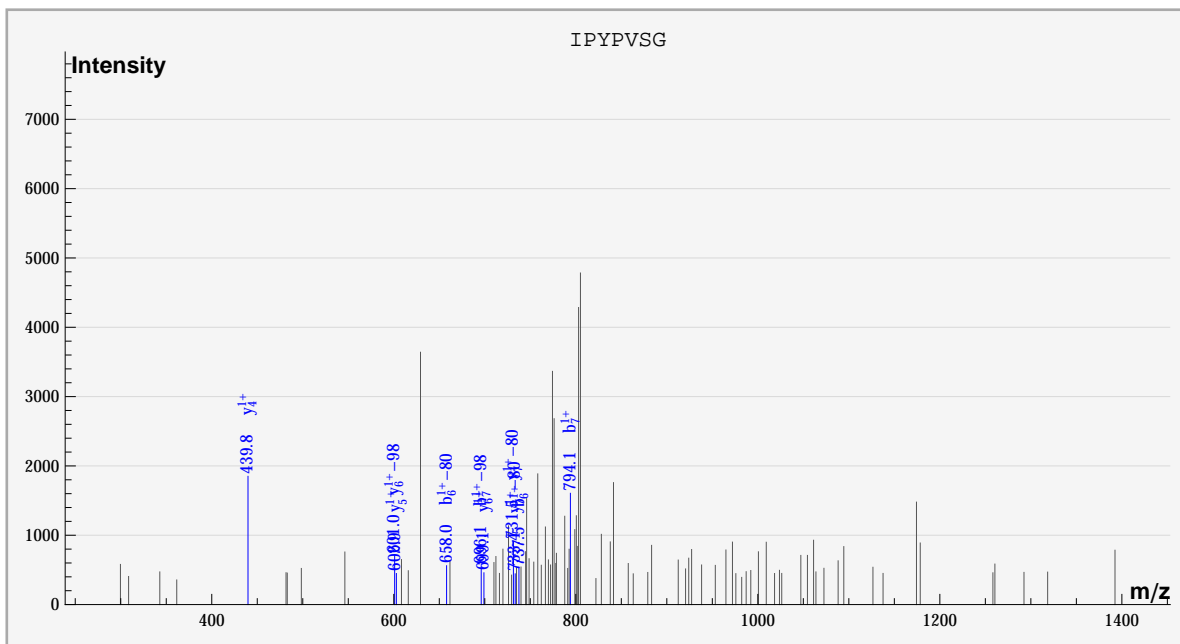

|   | # | b | b* | # | y | y* | P | P* |
|---|---|---|----|---|---|----|---|----|
| I | 1 |   |    |   |   |    |   | ✓  |
| P | 2 |   |    | 6 | ✓ | ✓  |   |    |
| Y | 3 |   |    | 5 | ✓ |    |   |    |
| P | 4 |   |    | 4 | ✓ |    |   |    |
| V | 5 |   |    | 3 |   |    |   |    |
| S | 6 | ✓ | ✓  | 2 |   |    |   |    |
| G | 7 | ✓ | ✓  | 1 |   |    |   |    |

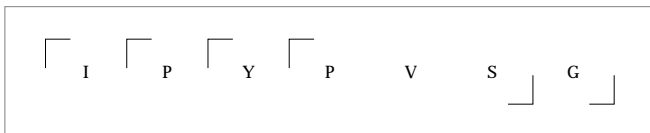

dbValid true GIEWTK PHOS(1) 1. 815. -1.64579 5.20903 100. ? 2376.  
 S\_Acido\_new%gi|68566862|gb|AAY79791.1| GIEWTK%::::PHOS::%sample\_1%compd\_1021

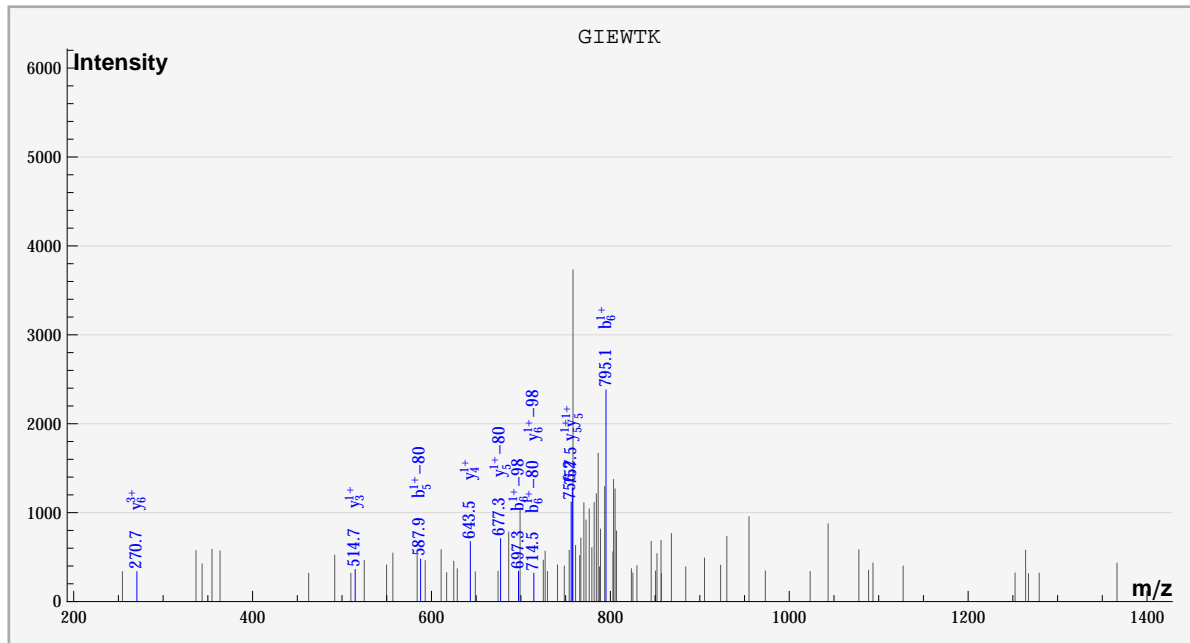

|   | # | b | b* | # | y | y* | P | P* |
|---|---|---|----|---|---|----|---|----|
| G | 1 |   |    |   |   |    | ✓ | ✓  |
| I | 2 |   |    | 5 | ✓ | ✓  |   |    |
| E | 3 |   |    | 4 | ✓ |    |   |    |
| W | 4 |   |    | 3 | ✓ |    |   |    |
| T | 5 | ✓ | ✓  | 2 |   |    |   |    |
| K | 6 | ✓ | ✓  | 1 |   |    |   |    |

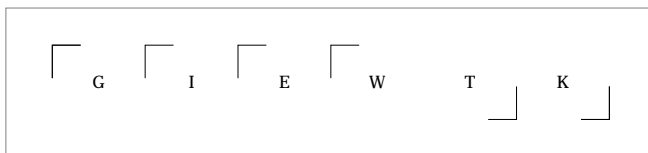

dbValid true LINVDLTTQEGKSK PHOS(1) 2. 815. -1.58908 5.13338 100. ? 2544.  
 S\_Acido\_new%gi|68567037|gb|AA79966.1| LINVDLTTQEGKSK%:::PHOS::%sample\_2%compd\_1089

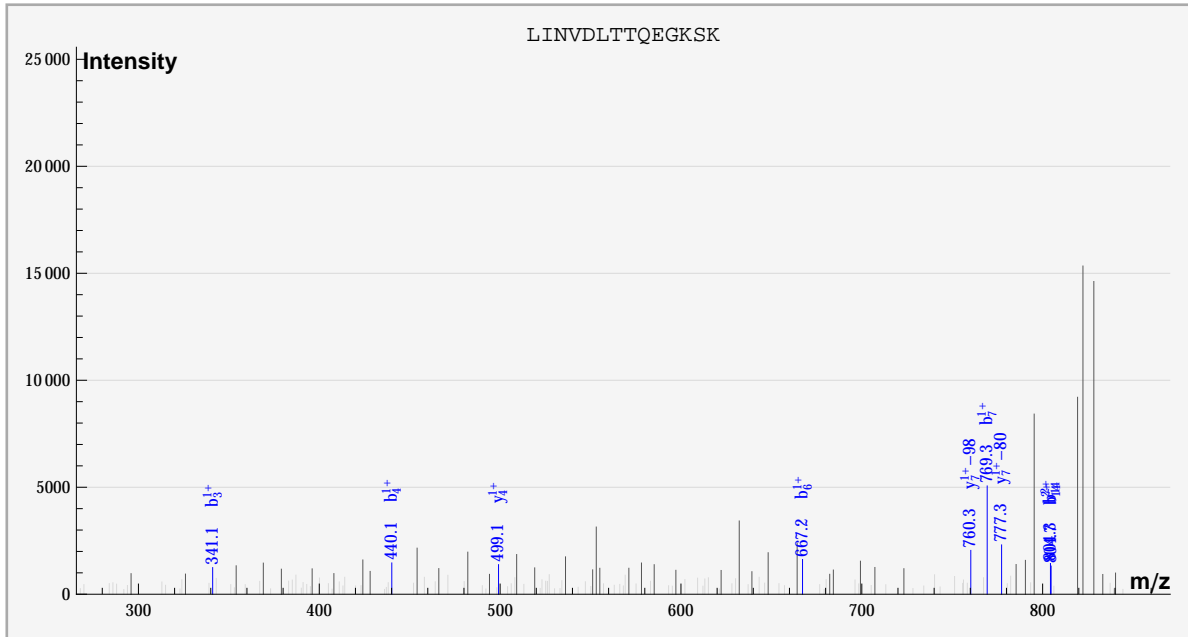

|   | #  | b | b* | #  | y | y* | P | P* |
|---|----|---|----|----|---|----|---|----|
| L | 1  |   |    |    |   |    |   |    |
| I | 2  |   |    | 13 |   |    |   |    |
| N | 3  | ✓ |    | 12 |   |    |   |    |
| V | 4  | ✓ |    | 11 |   |    |   |    |
| D | 5  |   |    | 10 |   |    |   |    |
| L | 6  | ✓ |    | 9  |   |    |   |    |
| T | 7  | ✓ |    | 8  |   |    |   |    |
| T | 8  |   |    | 7  | ✓ |    |   |    |
| Q | 9  |   |    | 6  |   |    |   |    |
| E | 10 |   |    | 5  |   |    |   |    |
| G | 11 |   |    | 4  | ✓ |    |   |    |
| K | 12 |   |    | 3  |   |    |   |    |
| S | 13 |   |    | 2  |   |    |   |    |
| K | 14 | ✓ |    | 1  |   |    |   |    |

L I N V D L T T Q E G K S K

dbValid true EYTKLAITYSRK PHOS(2) 2. 815. 1.87532 5.50182 100. ? 3234.

S\_Acido\_new%gi|68566534|gb|AA79463.1| EYTKLAITYSRK%::PHOS:PHOS::::::::::%sample\_2%cmpd\_1666

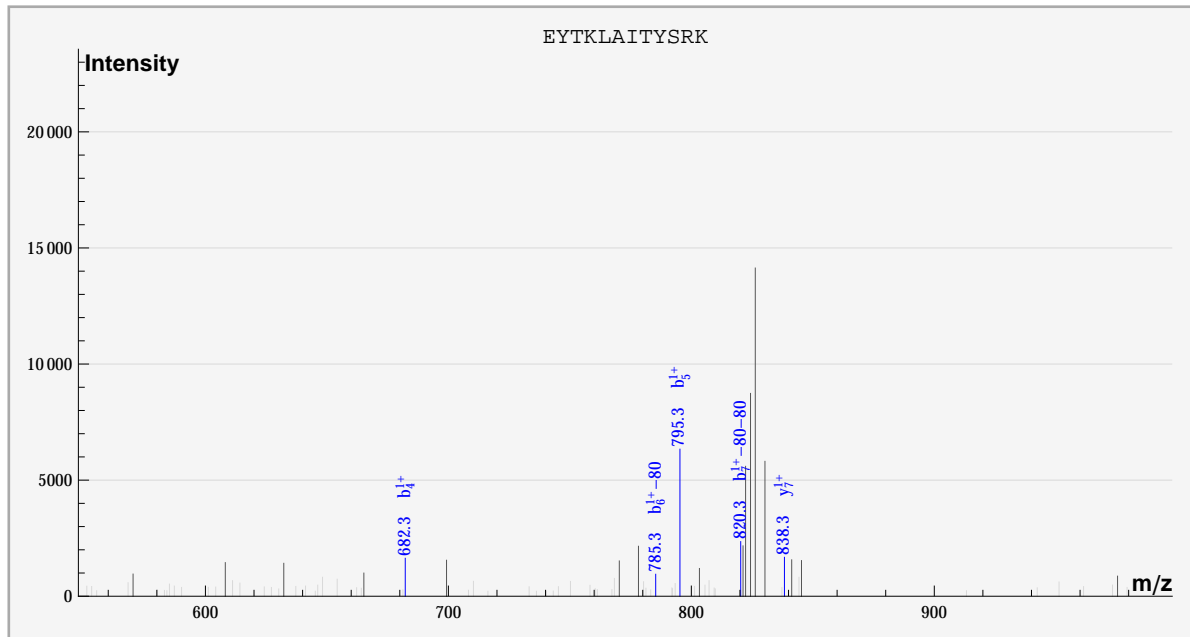

|   | #  | b | b* | #  | y | y* | P | P* |
|---|----|---|----|----|---|----|---|----|
| E | 1  |   |    |    |   |    |   |    |
| Y | 2  |   |    | 11 |   |    |   |    |
| T | 3  |   |    | 10 |   |    |   |    |
| K | 4  | ✓ |    | 9  |   |    |   |    |
| L | 5  | ✓ |    | 8  |   |    |   |    |
| A | 6  |   | ✓  | 7  | ✓ |    |   |    |
| I | 7  |   | ✓  | 6  |   |    |   |    |
| T | 8  |   |    | 5  |   |    |   |    |
| Y | 9  |   |    | 4  |   |    |   |    |
| S | 10 |   |    | 3  |   |    |   |    |
| R | 11 |   |    | 2  |   |    |   |    |
| K | 12 |   |    | 1  |   |    |   |    |

E Y T K L A I T Y S R K

dbValid true ELYYQATSSSNK PHOS(3) 2. 815. 0.777347 5.50205 100. ? 3528.

S\_Acido\_new%gi|68566756|gb|AA79685.1| ELYYQATSSSNK%:::PHOS:::PHOS:PHOS:::sample\_1%compd\_2076

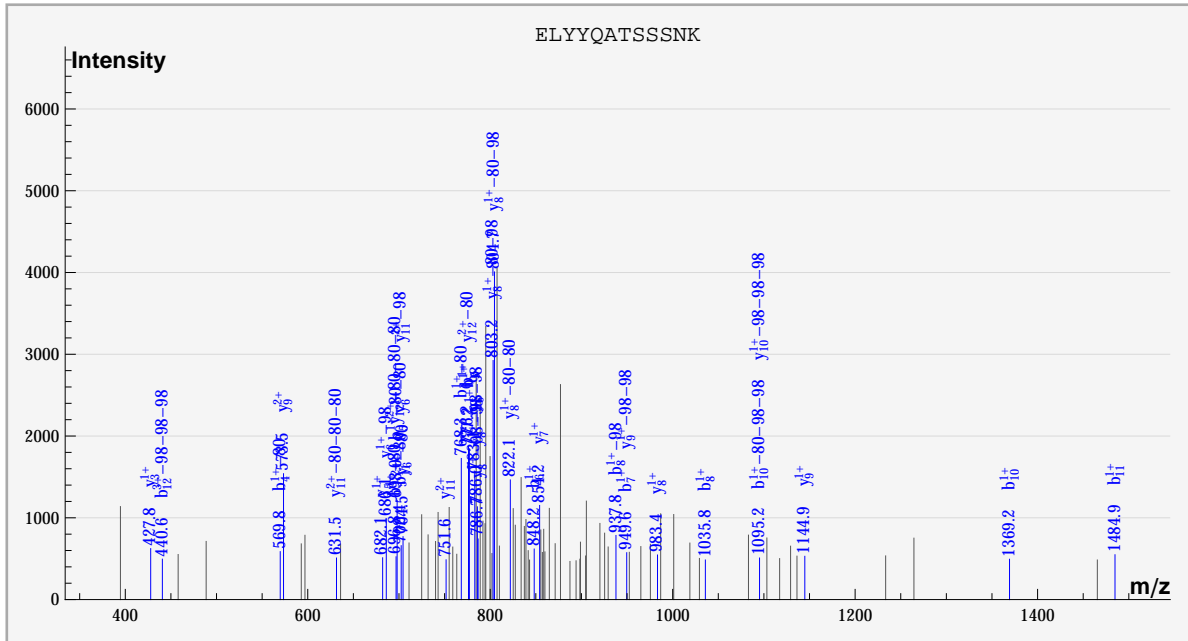

|   | #  | b | b* | #  | y | y* | P | P* |
|---|----|---|----|----|---|----|---|----|
| E | 1  |   |    |    |   |    |   | ✓  |
| L | 2  |   |    | 11 | ✓ | ✓  |   |    |
| Y | 3  |   |    | 10 |   | ✓  |   |    |
| Y | 4  | ✓ | ✓  | 9  | ✓ | ✓  |   |    |
| Q | 5  | ✓ | ✓  | 8  | ✓ | ✓  |   |    |
| A | 6  | ✓ | ✓  | 7  | ✓ |    |   |    |
| T | 7  | ✓ |    | 6  | ✓ | ✓  |   |    |
| S | 8  | ✓ | ✓  | 5  | ✓ |    |   |    |
| S | 9  |   |    | 4  |   |    |   |    |
| S | 10 | ✓ | ✓  | 3  | ✓ |    |   |    |
| N | 11 | ✓ | ✓  | 2  |   |    |   |    |
| K | 12 |   | ✓  | 1  |   |    |   |    |

E L Y Y Q A T S S S N K

dbValid true YTIIPK PHOS(1) 1. 816. -1.589 5.56373 100. ? 2388.  
 S\_Acido\_new%gi|68567857|gb|AAY80786.1| YTIIPK%:PHOS::::::%sample\_2%compd\_960

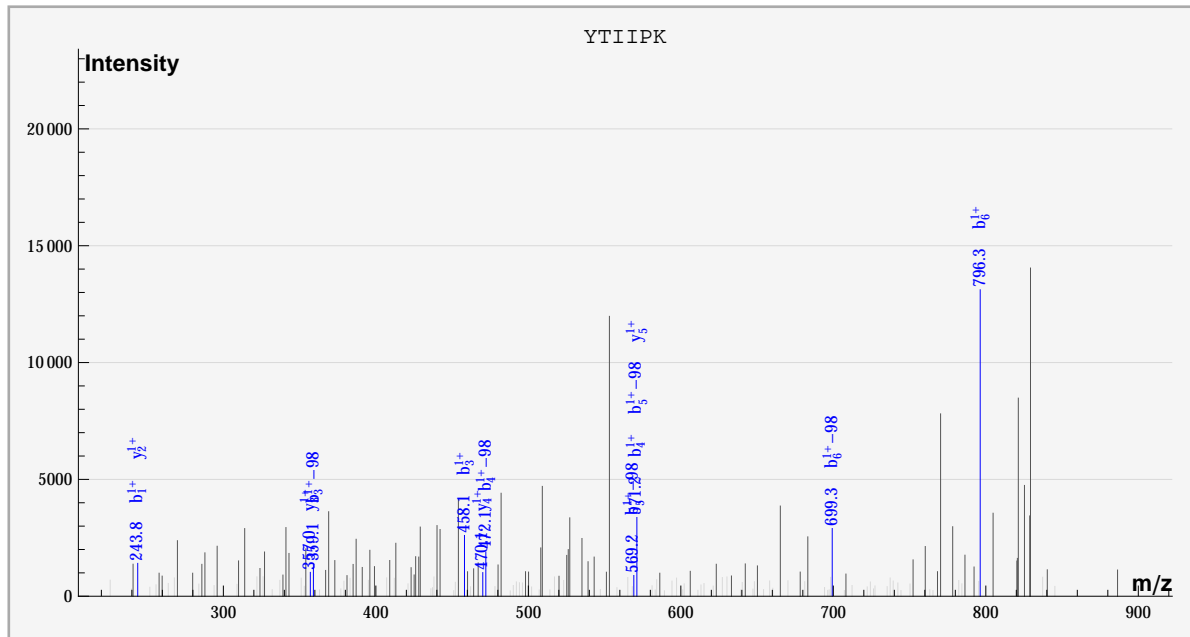

|   | # | b | b* | # | y | y* | P | P* |
|---|---|---|----|---|---|----|---|----|
| Y | 1 | ✓ |    |   |   |    |   |    |
| T | 2 |   |    | 5 | ✓ |    |   |    |
| I | 3 | ✓ | ✓  | 4 | ✓ |    |   |    |
| I | 4 | ✓ | ✓  | 3 | ✓ |    |   |    |
| P | 5 |   | ✓  | 2 | ✓ |    |   |    |
| K | 6 | ✓ | ✓  | 1 |   |    |   |    |

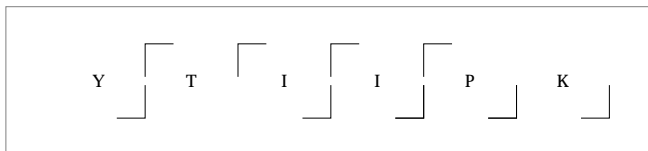



dbValid true YTIIPK PHOS(1) 1. 816. -1.589 5.32114 100. ? 2400.  
 S\_Acido\_new%gi|68567857|gb|AAY80786.1| YTIIPK%:PHOS::::::%sample\_2%cmpd\_970

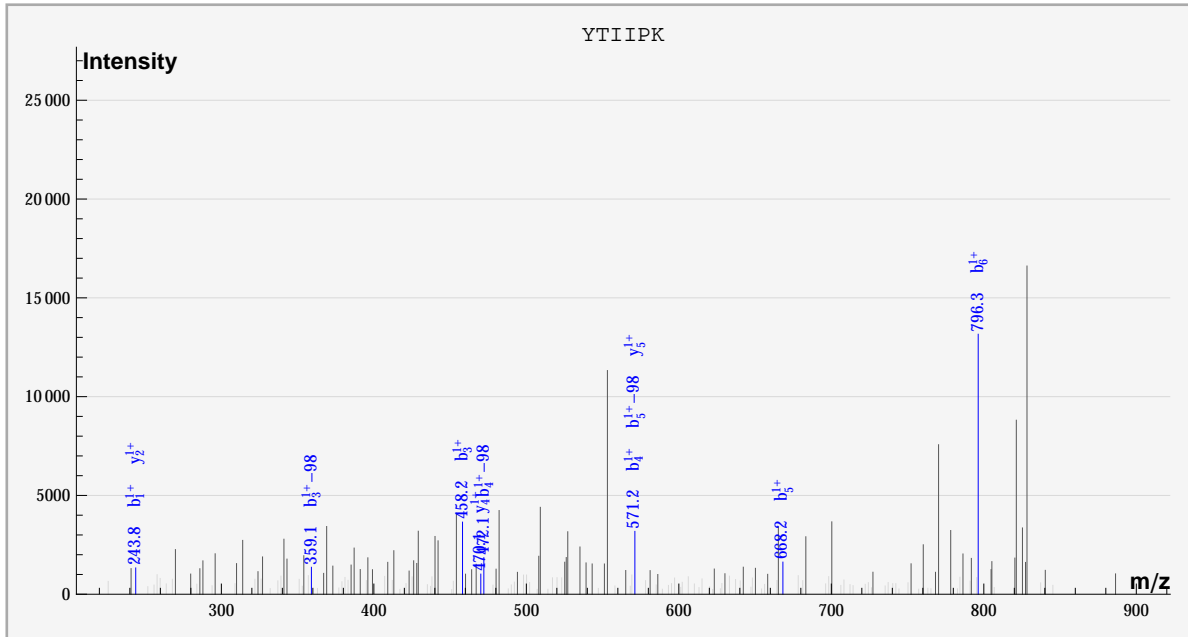

|   | # | b | b* | # | y | y* | P | P* |
|---|---|---|----|---|---|----|---|----|
| Y | 1 | ✓ |    |   |   |    |   |    |
| T | 2 |   |    | 5 | ✓ |    |   |    |
| I | 3 | ✓ | ✓  | 4 | ✓ |    |   |    |
| I | 4 | ✓ | ✓  | 3 |   |    |   |    |
| P | 5 | ✓ | ✓  | 2 | ✓ |    |   |    |
| K | 6 | ✓ |    | 1 |   |    |   |    |

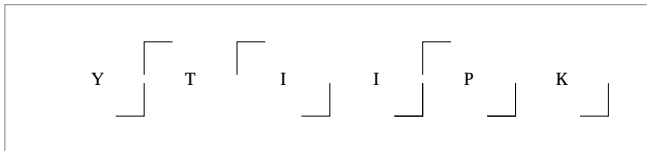

dbValid true YTIIPK PHOS(1) 1. 816. -1.589 5.60153 100. ? 2412.  
 S\_Acido\_new%gi|68567857|gb|AAY80786.1| YTIIPK%:PHOS::::::%sample\_2%compd\_980

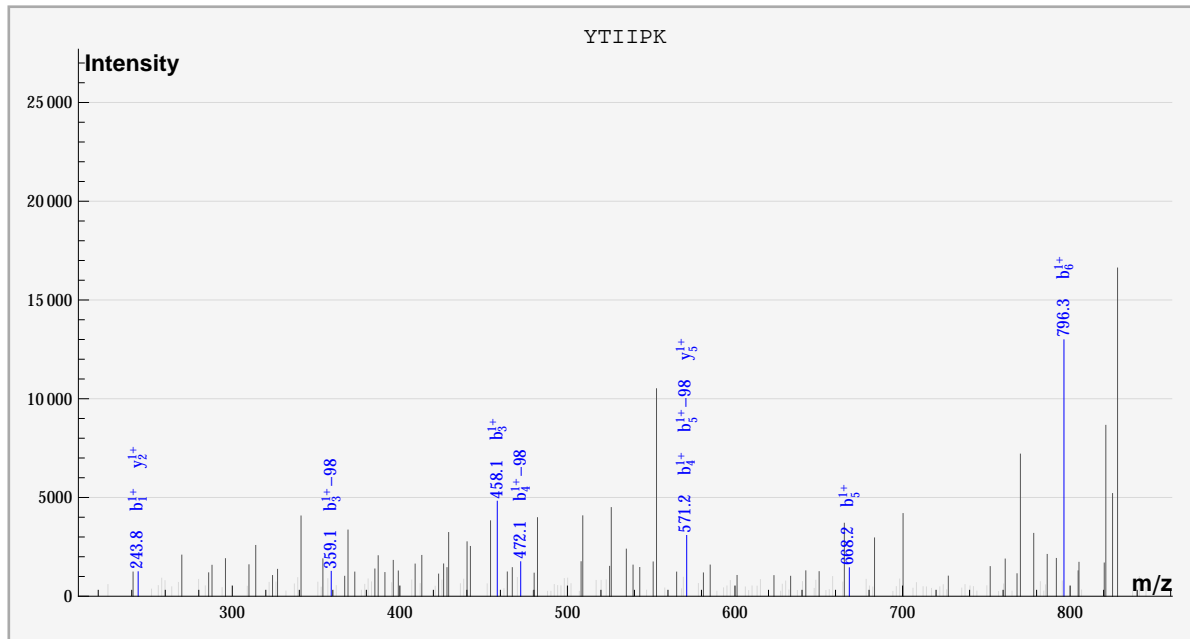

|   | # | b | b* | # | y | y* | P | P* |
|---|---|---|----|---|---|----|---|----|
| Y | 1 | ✓ |    |   |   |    |   |    |
| T | 2 |   |    | 5 | ✓ |    |   |    |
| I | 3 | ✓ | ✓  | 4 |   |    |   |    |
| I | 4 | ✓ | ✓  | 3 |   |    |   |    |
| P | 5 | ✓ | ✓  | 2 | ✓ |    |   |    |
| K | 6 | ✓ |    | 1 |   |    |   |    |

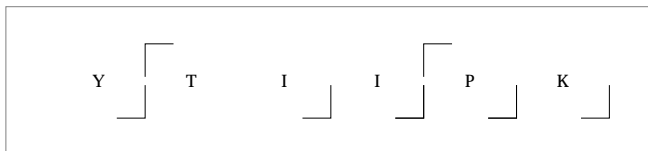

dbValid true YTIIPK PHOS(1) 1. 816. -1.589 5.62311 100. ? 2424.  
 S\_Acido\_new%gi|68567857|gb|AAY80786.1| YTIIPK%:PHOS::::::%sample\_2%compd\_991

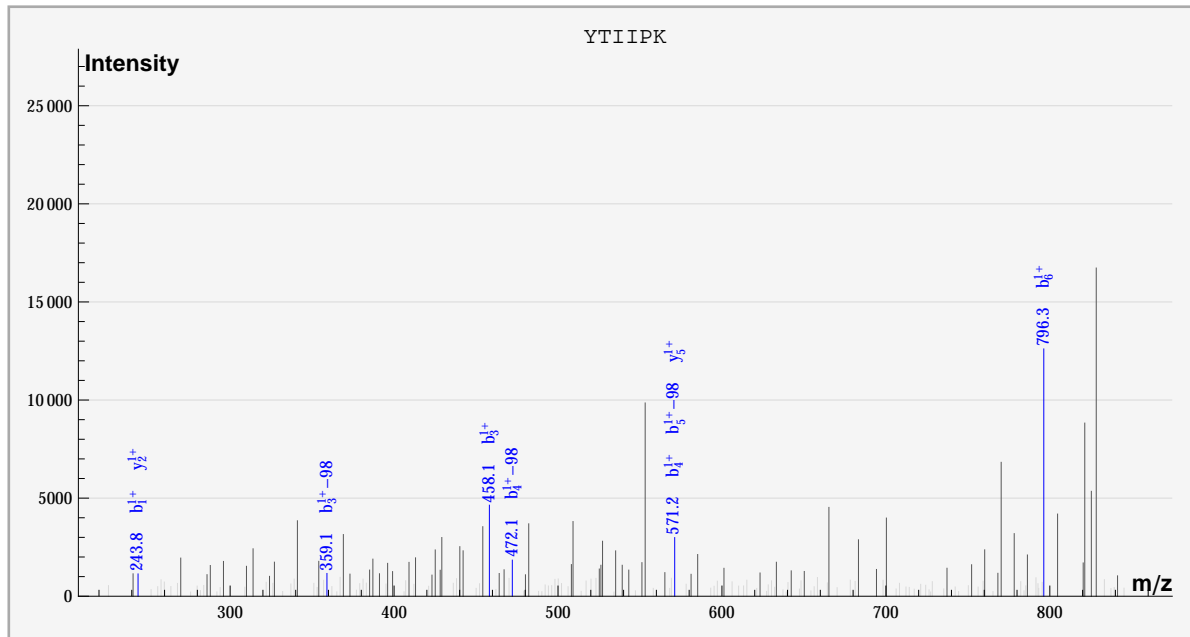

|   | # | b | b* | # | y | y* | P | P* |
|---|---|---|----|---|---|----|---|----|
| Y | 1 | ✓ |    |   |   |    |   |    |
| T | 2 |   |    | 5 | ✓ |    |   |    |
| I | 3 | ✓ | ✓  | 4 |   |    |   |    |
| I | 4 | ✓ | ✓  | 3 |   |    |   |    |
| P | 5 |   | ✓  | 2 | ✓ |    |   |    |
| K | 6 | ✓ |    | 1 |   |    |   |    |

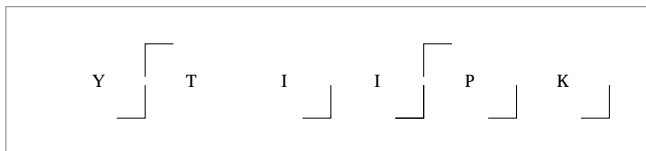

dbValid true YTIIPK PHOS(1) 1. 816. -1.589 5.16698 100. ? 2436.  
 S\_Acido\_new%gi|68567857|gb|AAY80786.1| YTIIPK%:PHOS::::::%sample\_2%compd\_1001

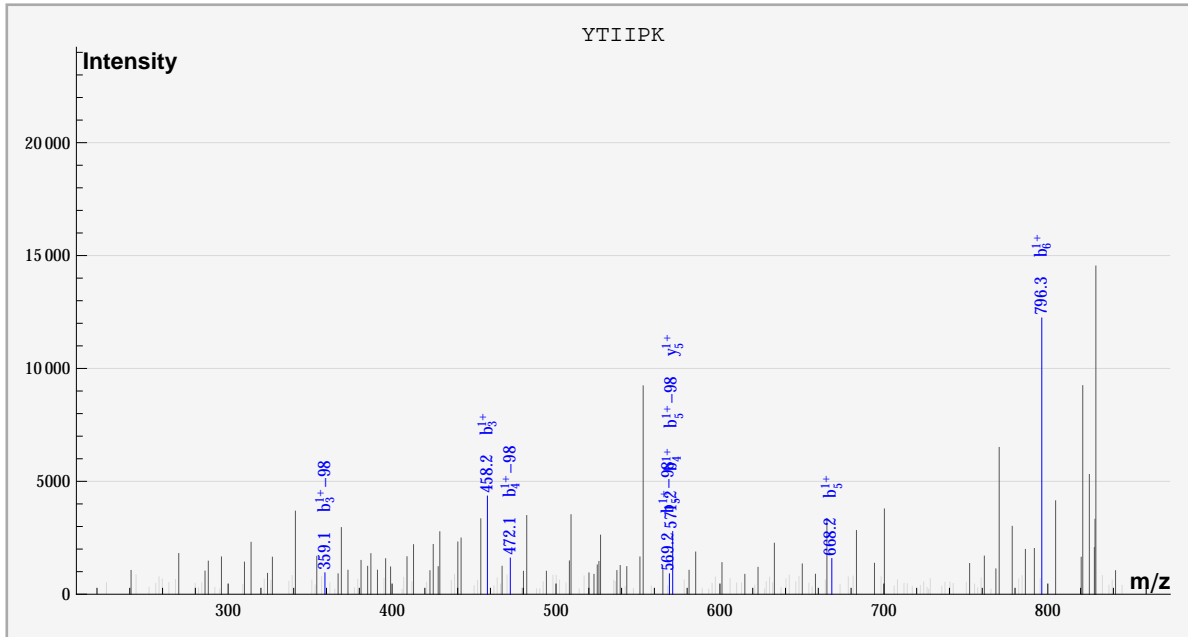

|   | # | b | b* | # | y | y* | P | P* |
|---|---|---|----|---|---|----|---|----|
| Y | 1 |   |    |   |   |    |   |    |
| T | 2 |   |    | 5 |   | ✓  |   |    |
| I | 3 | ✓ | ✓  | 4 |   |    |   |    |
| I | 4 | ✓ | ✓  | 3 |   |    |   |    |
| P | 5 | ✓ | ✓  | 2 |   |    |   |    |
| K | 6 | ✓ |    | 1 |   |    |   |    |

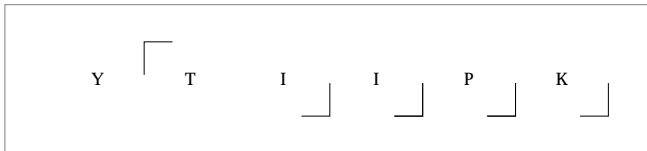

dbValid true YTIIPK PHOS(1) 1. 816. -1.589 5.24102 100. ? 2448.  
 S\_Acido\_new%gi|68567857|gb|AAY80786.1| YTIIPK%:PHOS::::::%sample\_2%cmpd\_1011

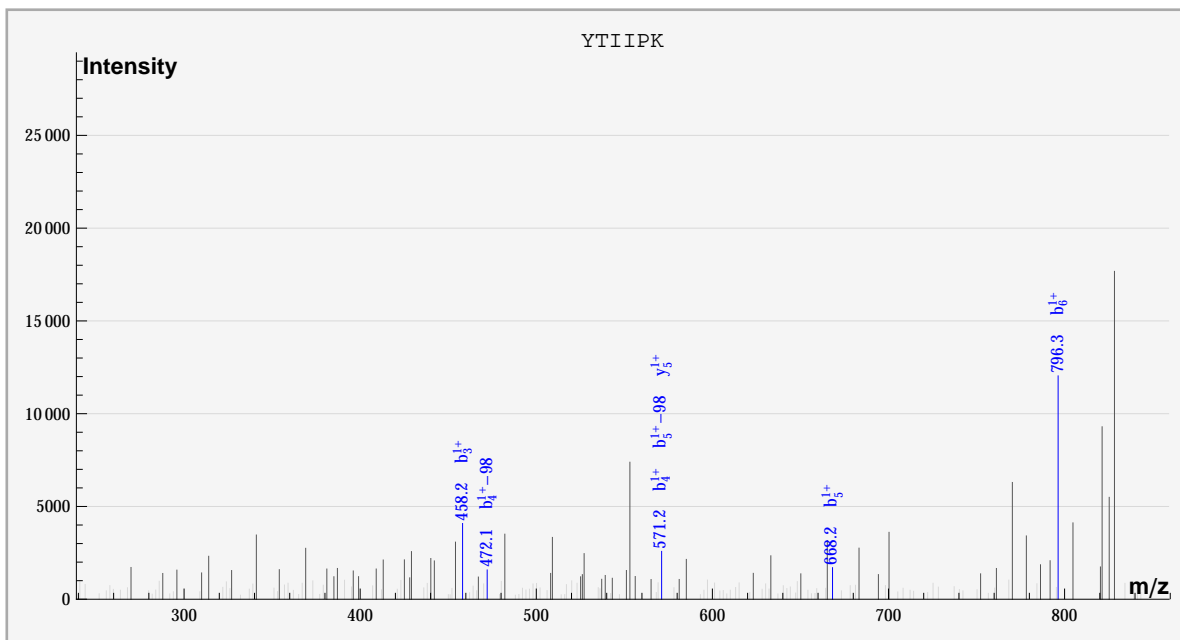

|   | # | b | b* | # | y | y* | P | P* |
|---|---|---|----|---|---|----|---|----|
| Y | 1 |   |    |   |   |    |   |    |
| T | 2 |   |    | 5 | ✓ |    |   |    |
| I | 3 | ✓ |    | 4 |   |    |   |    |
| I | 4 | ✓ | ✓  | 3 |   |    |   |    |
| P | 5 | ✓ | ✓  | 2 |   |    |   |    |
| K | 6 | ✓ |    | 1 |   |    |   |    |

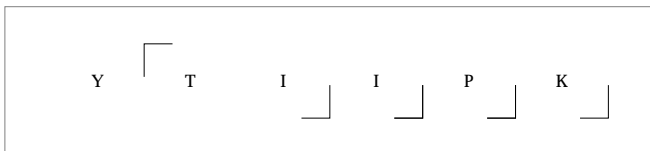



dbValid true EWRQMLFETWK PHOS(1) 2. 816. 1.36526 5.30934 100. ? 3858.  
 S\_Acido\_new%gi|68568658|gb|AAY81587.1| EWRQMLFETWK%:::::PHOS:::sample\_1%compd\_2376

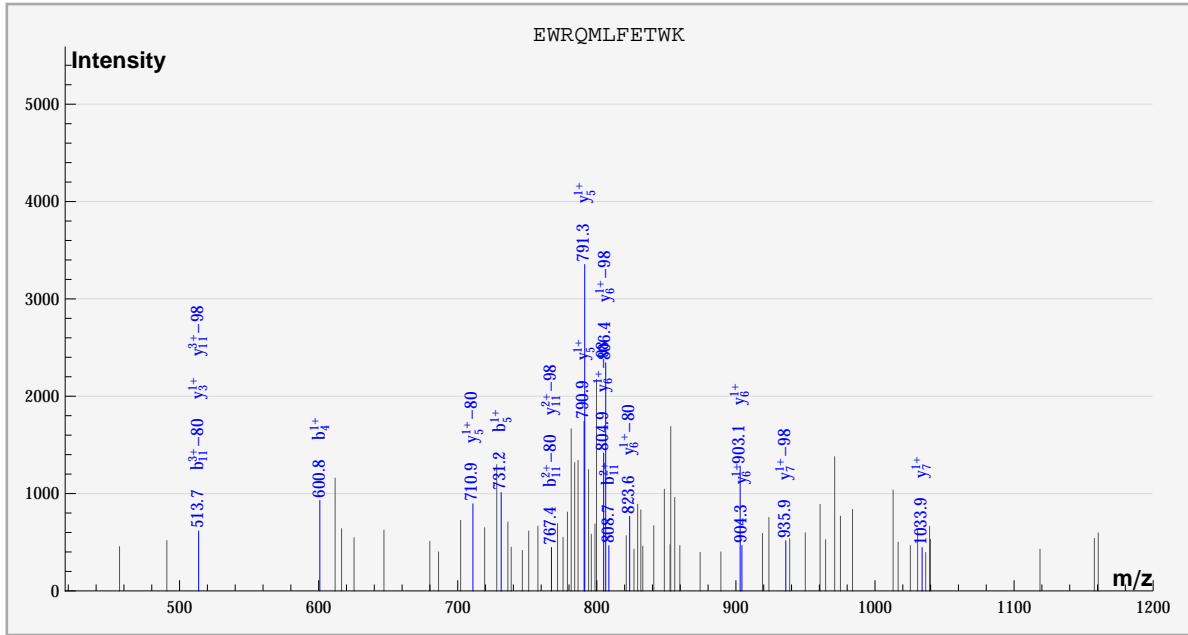

|   | #  | b | b* | #  | y | y* | P | P* |
|---|----|---|----|----|---|----|---|----|
| E | 1  |   |    |    |   |    |   | ✓  |
| W | 2  |   |    | 10 |   |    |   |    |
| R | 3  |   |    | 9  |   |    |   |    |
| Q | 4  | ✓ |    | 8  |   |    |   |    |
| M | 5  | ✓ |    | 7  | ✓ | ✓  |   |    |
| L | 6  |   |    | 6  | ✓ | ✓  |   |    |
| F | 7  |   |    | 5  | ✓ | ✓  |   |    |
| E | 8  |   |    | 4  |   |    |   |    |
| T | 9  |   |    | 3  | ✓ |    |   |    |
| W | 10 |   |    | 2  |   |    |   |    |
| K | 11 | ✓ | ✓  | 1  |   |    |   |    |

「 E W R Q 」 M 「 L 「 F E 「 T W K 」

dbValid true RIMYNTARVLANK PHOS(1) 2. 817. -1.58164 5.68741 100. ? 2304.  
 S\_Acido\_new%gii68568689|gb|AAY81618.1| RIMYNTARVLANK%:::PHOS:::sample\_1%compd\_956

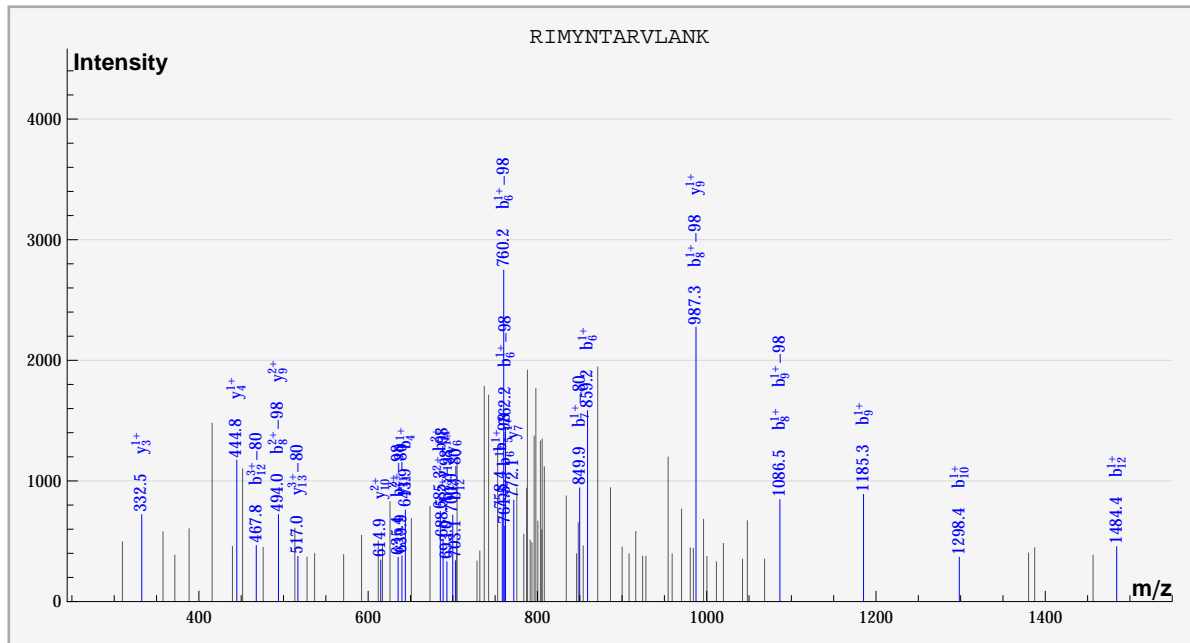

|   | #  | b | b* | #  | y | y* | P | P* |
|---|----|---|----|----|---|----|---|----|
| R | 1  |   |    |    |   |    |   | ✓  |
| I | 2  |   |    | 12 |   | ✓  |   |    |
| M | 3  |   |    | 11 |   | ✓  |   |    |
| Y | 4  | ✓ |    | 10 | ✓ |    |   |    |
| N | 5  | ✓ |    | 9  | ✓ |    |   |    |
| T | 6  | ✓ | ✓  | 8  |   |    |   |    |
| A | 7  |   | ✓  | 7  | ✓ |    |   |    |
| R | 8  | ✓ | ✓  | 6  | ✓ |    |   |    |
| V | 9  | ✓ | ✓  | 5  |   |    |   |    |
| L | 10 | ✓ |    | 4  | ✓ |    |   |    |
| A | 11 | ✓ | ✓  | 3  | ✓ |    |   |    |
| N | 12 | ✓ | ✓  | 2  |   |    |   |    |
| K | 13 |   |    | 1  |   |    |   |    |

R I M Y N T A R V L A N K



dbValid true TIIFEI PHOS(1) 1. 817. -1.60499 5.87888 100. ? 2526.  
 S\_Acido\_new%gi|68567491|gb|AAY80420.1| TIIFEI%:PHOS::::::%sample\_2%compd\_1071

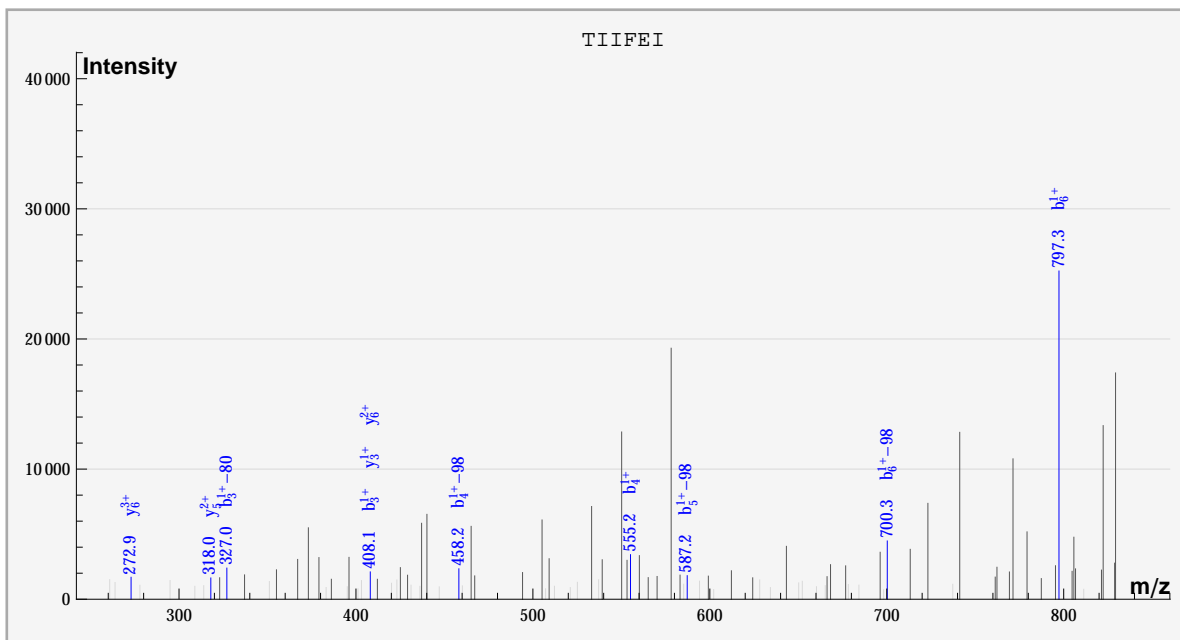

|   | # | b | b* | # | y | y* | P | P* |
|---|---|---|----|---|---|----|---|----|
| T | 1 |   |    |   |   |    | ✓ |    |
| I | 2 |   |    | 5 | ✓ |    |   |    |
| I | 3 | ✓ | ✓  | 4 |   |    |   |    |
| F | 4 | ✓ | ✓  | 3 | ✓ |    |   |    |
| E | 5 |   | ✓  | 2 |   |    |   |    |
| I | 6 | ✓ | ✓  | 1 |   |    |   |    |

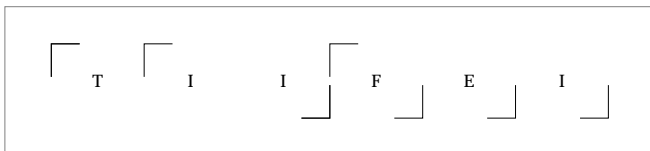

dbConflictWinner true TIIFEI PHOS(1) 1. 817. -1.60499 6.7741 100. ?  
 2544. S\_Acido\_new%gi|68567491|gb|AAY80420.1| TIIFEI%:PHOS:::sample\_2%cmpd\_1091

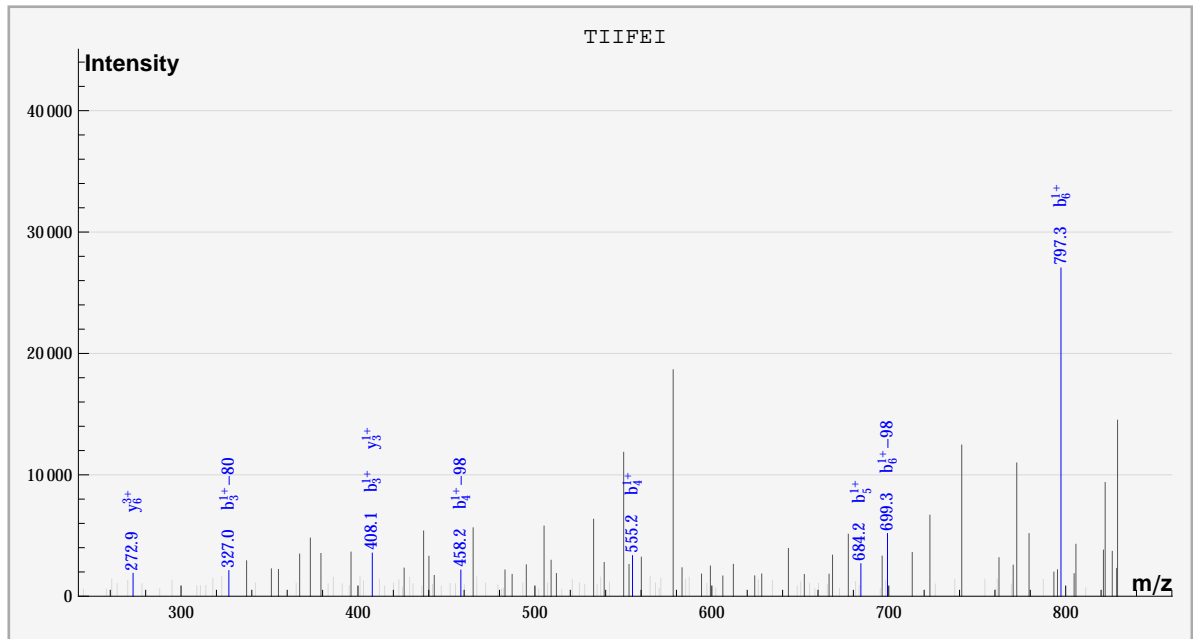

|   | # | b | b* | # | y | y* | P | P* |
|---|---|---|----|---|---|----|---|----|
| T | 1 |   |    |   |   |    | ✓ |    |
| I | 2 |   |    | 5 |   |    |   |    |
| I | 3 | ✓ | ✓  | 4 |   |    |   |    |
| F | 4 | ✓ | ✓  | 3 | ✓ |    |   |    |
| E | 5 | ✓ |    | 2 |   |    |   |    |
| I | 6 | ✓ | ✓  | 1 |   |    |   |    |

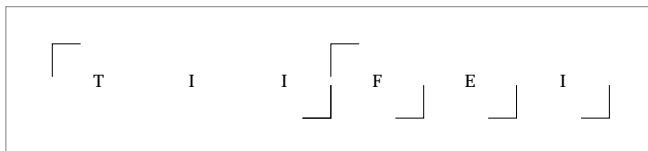

Supplement: supp_M113.027375_mcp.M113.027375-13.pdf [file supp_M113.027375_mcp.M113.027375-13.pdf]
