# Supplementary material
Source: PubMed Central journal article supplement (PMC3861733)
Supplement: supp_M113.027375_mcp.M113.027375-10.pdf [file supp_M113.027375_mcp.M113.027375-10.pdf]

## Supporting information of

### “Archaeal Protein Phosphorylation: Impact of Phosphatase Deletion on Motility and Energy Metabolism in *Sulfolobus acidocaldarius*”

Julia Reimann, Dominik Esser, Alvaro Orell, Fabian Amman, Trong Khoa Pham, Ann-Christin Lindås, Rolf Bernander, Phillip C. Wright, Bettina Siebers and Sonja-Verena Albers

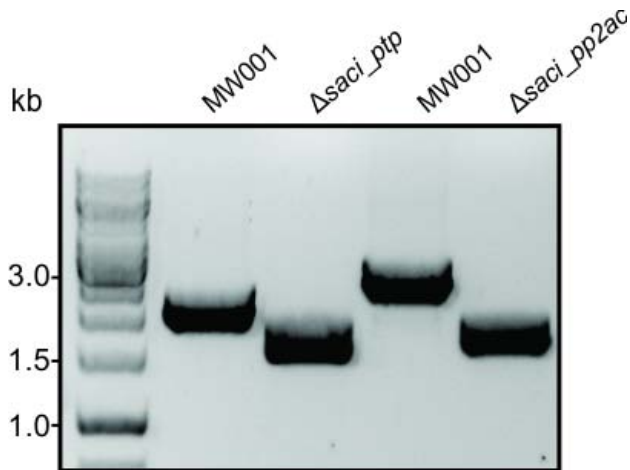

**Figure S1. PCR verification of both phosphatase deletion mutants.** PCR of the markerless in-frame deletion mutants  $\Delta saci\_ptp$  and  $\Delta saci\_pp2a$  resulted in smaller PCR products of the genomic region compared to the parent strain MW001 (1786 nt vs. 2238 nt and 1869 nt vs 2733 nt, respectively). The deletion mutants were additionally confirmed by sequencing.

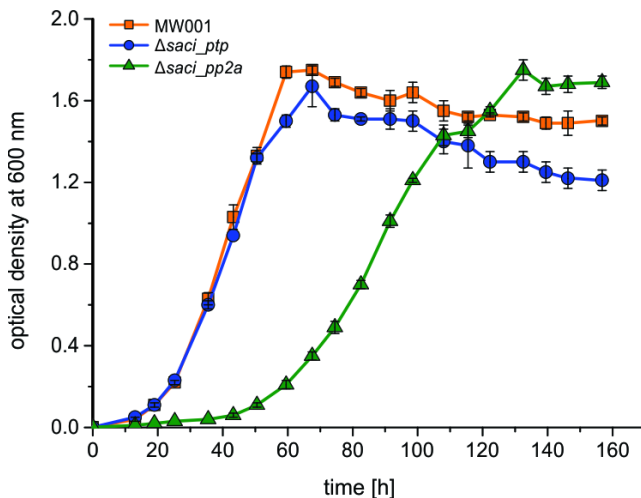

**Figure S2. Slower growth rate of  $\Delta saci\_pp2a$  in comparison to MW001 and  $\Delta saci\_ptp$ .** All three strains were grown for 160 hours in Brock medium supplemented with 0.1% NZ-amine, 0.2% sucrose and 10  $\mu\text{g/ml}$  uracil at 76°C.  $\Delta saci\_ptp$  was comparable in growth to the background strain MW001, whereas the  $saci\_pp2a$  deletion mutant displayed an extended lag-phase and also a slower growth rate. All growth experiments were performed in triplicate, and the standard deviation is shown.

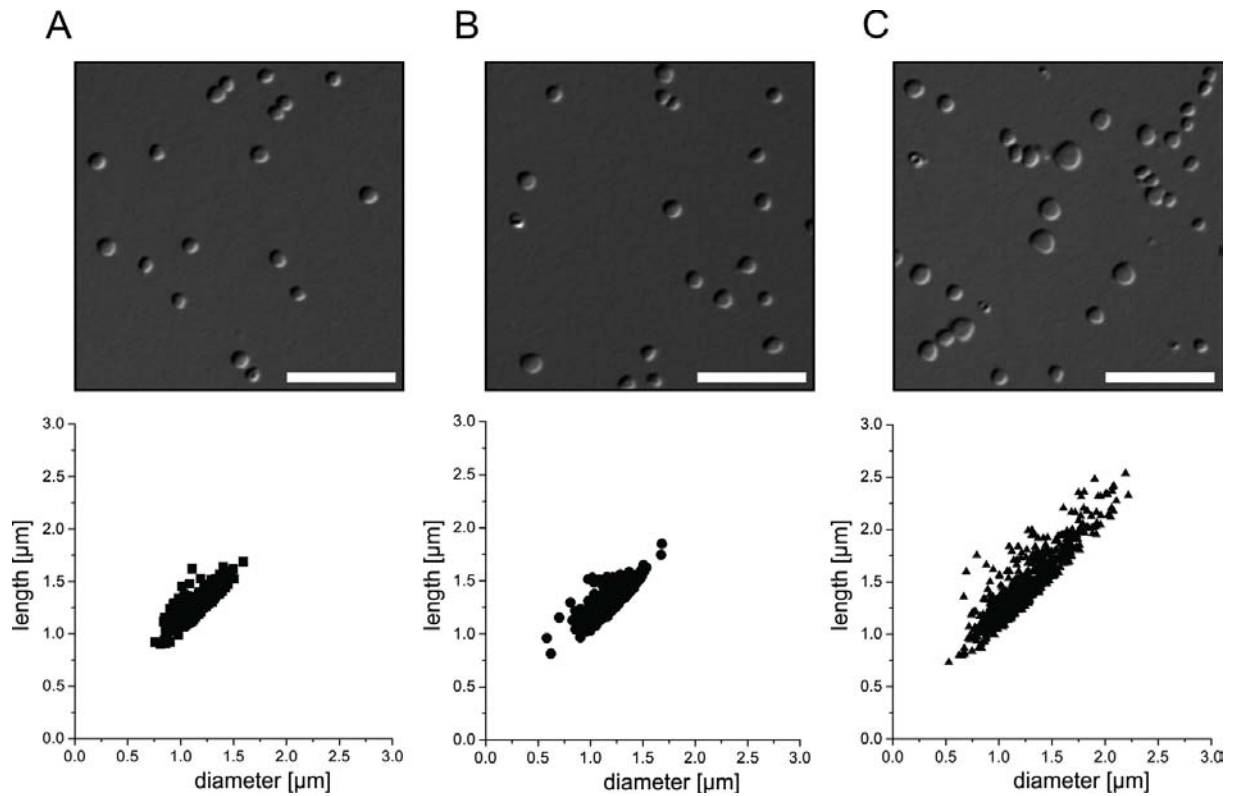

**Figure S3. Cell shape and size of the phosphatase deletion mutant  $\Delta saci\_pp2a$ ,  $\Delta saci\_ptp$  and MW001.** MW001 and  $\Delta saci\_ptp$  show the regular spherical cell shape of *Sulfolobales* (A and B, upper panel), whereas the  $saci\_pp2a$  deletion mutant showed a significantly increased amount of larger cells (C, upper panel). Evaluation of the cell size distribution using ObjectJ revealed a spread distribution in  $\Delta saci\_pp2a$  towards larger sizes (C, lower panel), compared to the parent strain MW001 (A, lower panel) and the  $saci\_ptp$  deletion strain (B, lower panel). The calibration bar indicates 10  $\mu\text{m}$ .

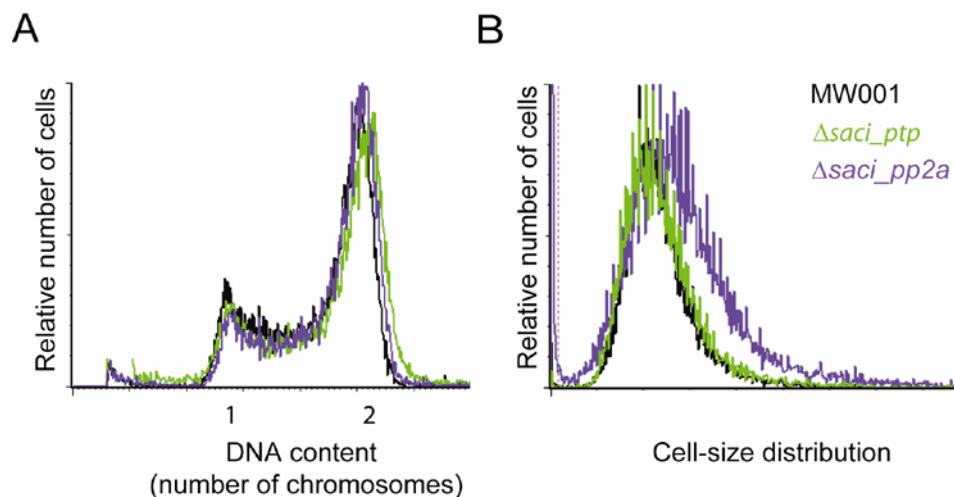

**Figure S4. Flow cytometry of MW001 in comparison to  $\Delta saci\_ptp$  and  $\Delta saci\_pp2a$ .** (A) All three strains show the typical DNA content distribution of exponentially growing *Sulfolobus* cultures [1]. (B) In the cell size the Ser/Thr phosphatase deletion mutant ( $\Delta saci\_pp2a$ ) shows an increase in the relative number of larger cells as compared to the parent strain and the Tyr phosphatase deletion mutant ( $\Delta saci\_ptp$ ).

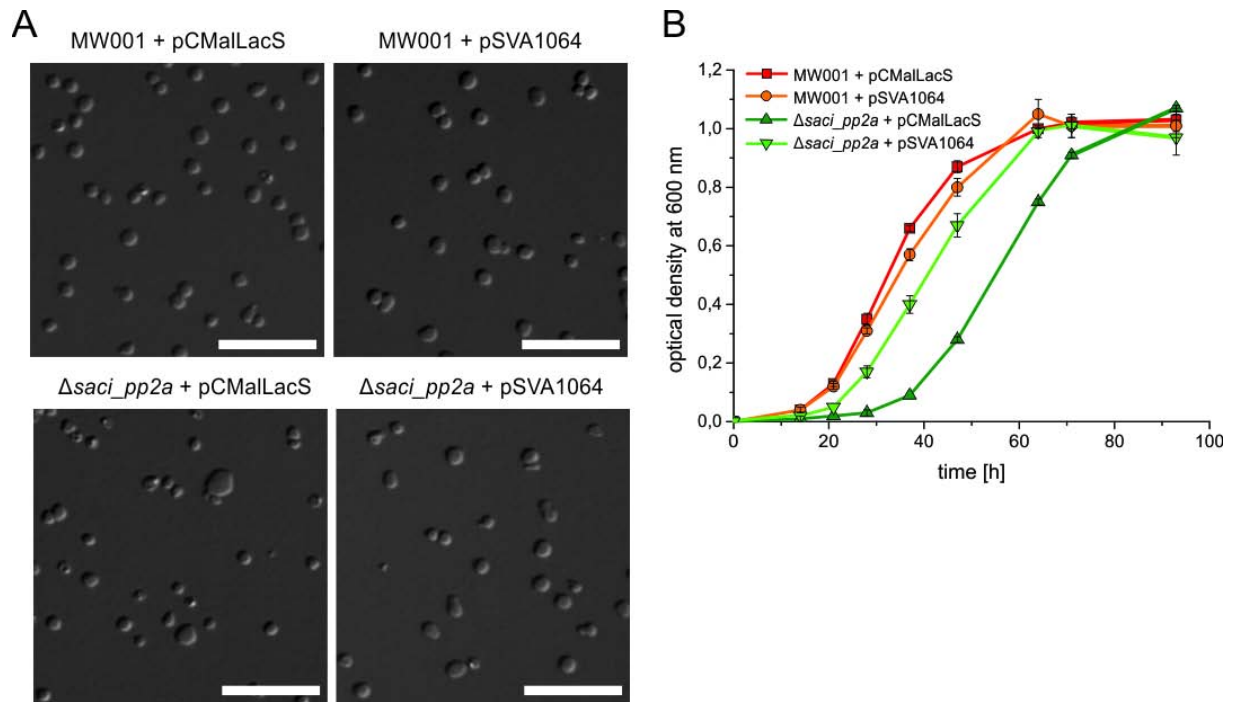

**Figure S5. Complementation of the  $\Delta$ saci\_pp2a deletion.**  $\Delta$ saci\_pp2a and MW001 were transformed with the control plasmid pCMalLacS and the complementation plasmid pSVA1064. (A) DIC light microscopy images of  $\Delta$ saci\_pp2a in comparison to MW001. In the complemented strain  $\Delta$ saci\_pp2a + pSVA1064, the cells became smaller and more homogeneous as compared to the parent strain. (B) Growth curve at 76°C in Brock medium supplemented with 0.1% NZ-amine and 0.2% sucrose. The complemented strain  $\Delta$ saci\_pp2a + pSVA1064 grew similar to the wild type strain. The scalebar indicates 10  $\mu$ m in all images. All growth curves were performed in triplicate, and the standard deviations are shown.

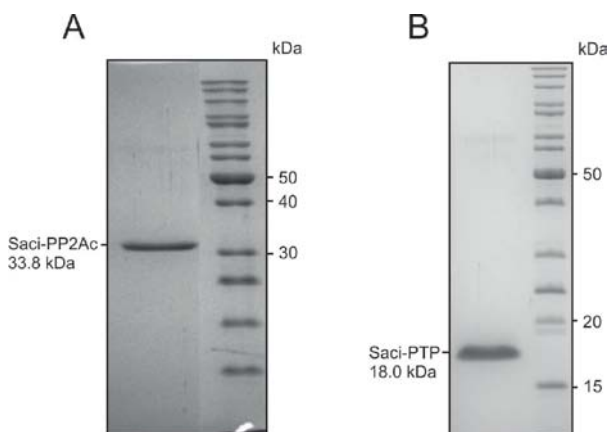

**Figure S6. Purification of Saci-PP2A and Saci-PTP.** 2  $\mu$ g of Saci-PP2A (A) after size exclusion chromatography and Saci-PTP (B) after immobilized metal affinity chromatography were applied to SDS-PAGE. The SDS-gel was stained with Coomassie brilliant blue and PageRuler™ Unstained Protein Ladder (Fermentas) was used as size ladder.

**Figure S7.**

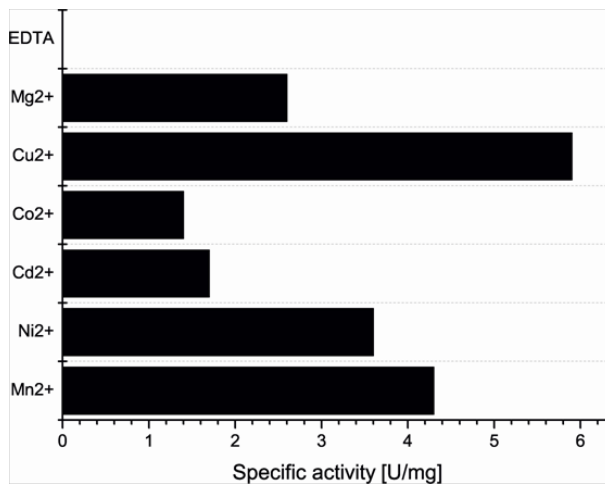

**Figure S8. Metal-ion dependency of Saci-PP2A in the presence of EGTA.** Enzyme activity was measured in the presence of 10 mM p-NPP, 5 mM Me<sup>2+</sup> and 1 mM EGTA. The highest activity was observed with Cu<sup>2+</sup> and Mn<sup>2+</sup>.

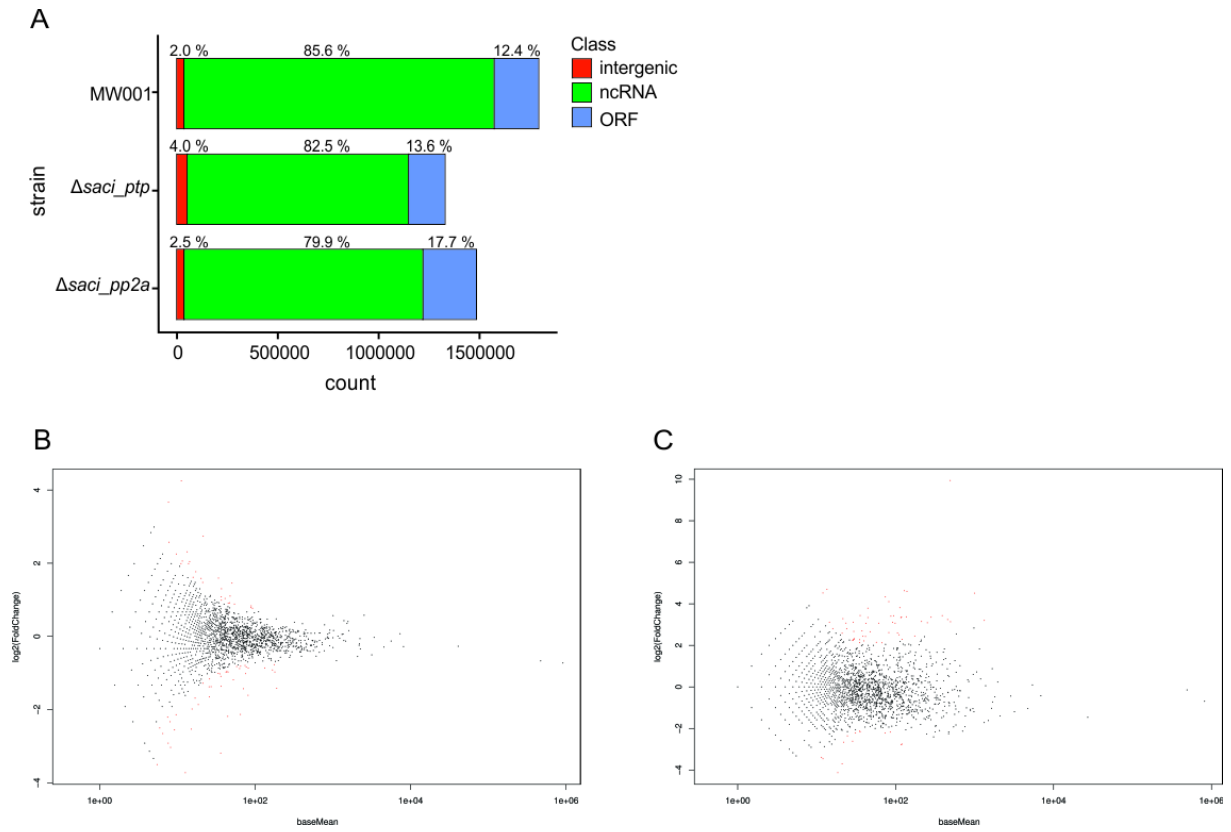

Figure S8. (A) Number of RNA-seq reads and genomic regions to which they were mapped, for samples from the parent strain MW001,  $\Delta saci\_ptp$  and  $\Delta saci\_pp2a$ . (B+C) Plots of normalized mean expression intensities versus  $\log_2$  fold change for parent strain against  $\Delta saci\_pp2a$  (B) and parent strain against  $\Delta saci\_ptp$  (C). Significantly altered genes (p-value < 0.055) are indicated red.

**Table S1. Phosphoproteome composition in *S. acidocaldarius* phosphatase deletion mutants  $\Delta$ saci\_ptp (S1b) and  $\Delta$ saci\_pp2a (S1c) and the parent strain MW001 (S1a). (extra files)**

**Table S2. Comparison between the number of phosphorylated proteins in MW001,  $\Delta$ saci\_pp2a,  $\Delta$ saci\_ptp with the number of proteins assigned to different arCOG categories in the wild type strain *S. acidocaldarius* DSM 639. Cellular metabolism: arCOGs C, E, F, G, H, I, P and Q; information storage/processes: D, M, N, T, O, U and V; information storage/processing (J, K and L); poorly characterized proteins (R, S and X).**

**Table S3. Differentially regulated genes in the *S. acidocaldarius* phosphatase deletion mutants  $\Delta$ saci\_ptp (Table S3b) and  $\Delta$ saci\_pp2a (Table S3a). (extra files)**

**Table S4. Distribution of detected mRNAs in arCOG categories.**

| arCOG category |                                                                 | Total |      | <i>Δsaci_pp2a</i> |      | <i>Δsaci_ptp</i> |      |
|----------------|-----------------------------------------------------------------|-------|------|-------------------|------|------------------|------|
|                |                                                                 | No.   | %    | No.               | %    | No.              | %    |
| arCOG C        | Energy production and conversion                                | 15    | 5.7  | 8                 | 5.7  | 7                | 5.7  |
| arCOG E        | Amino acid transport and metabolism                             | 6     | 2.3  | 3                 | 2.1  | 3                | 2.5  |
| arCOG F        | Nucleotide transport and metabolism                             | 4     | 1.5  | 2                 | 1.4  | 2                | 1.6  |
| arCOG G        | Carbohydrate transport and metabolism                           | 5     | 1.9  | 4                 | 2.9  | 1                | 0.8  |
| arCOG H        | Coenzyme transport and metabolism                               | 5     | 1.9  | 1                 | 0.7  | 4                | 3.3  |
| arCOG I        | Lipid transport and metabolism                                  | 6     | 2.3  | 2                 | 1.4  | 4                | 3.3  |
| arCOG J        | Translation, ribosomal structure and biogenesis                 | 4     | 1.5  | 1                 | 0.7  | 3                | 2.5  |
| arCOG K        | Transcription                                                   | 12    | 4.6  | 5                 | 3.6  | 7                | 5.7  |
| arCOG L        | Replication, recombination and repair                           | 4     | 1.5  | 2                 | 1.4  | 2                | 1.6  |
| arCOG N        | Cell motility                                                   | 4     | 1.5  | 2                 | 1.4  | 2                | 1.6  |
| arCOG O        | Posttranslational modification,<br>protein turnover, chaperones | 3     | 1.1  | 3                 | 2.1  | 0                | 0.0  |
| arCOG P        | Inorganic ion transport and metabolism                          | 4     | 1.5  | 3                 | 2.1  | 1                | 0.8  |
| arCOG Q        | Secondary metabolites<br>biosynthesis, transport and catabolism | 3     | 1.1  | 2                 | 1.4  | 1                | 0.8  |
| arCOG R        | General function predicted only                                 | 10    | 3.8  | 3                 | 2.1  | 7                | 5.7  |
| arCOG S        | Function unknown                                                | 34    | 13.0 | 20                | 14.3 | 14               | 11.5 |
| arCOG T        | Signal transduction mechanism                                   | 1     | 0.4  | 0                 | 0.0  | 1                | 0.8  |
| arCOG V        | Defense mechanism                                               | 2     | 0.8  | 2                 | 1.4  | 0                | 0.0  |
| arCOG X        | Not predicted                                                   | 4     | 1.5  | 2                 | 1.4  | 2                | 1.6  |
| No arCOG       | No arCOG                                                        | 8     | 3.1  | 3                 | 2.1  | 5                | 4.1  |
| <b>Total</b>   |                                                                 | 262   | 100  | 140               | 100  | 122              | 100  |

**Table S5.** Primers used in this study.

| primer                              | sequence (5' - 3')                                             | purpose                                              |
|-------------------------------------|----------------------------------------------------------------|------------------------------------------------------|
| <b>primers for pSVA1016</b>         |                                                                |                                                      |
| 1535                                | CCCCGGATCCGTTTTCGATTAGAACTATT                                  | <i>Δsaci0545</i> upstr fw <i>Bam</i> HI              |
| 1536                                | CATAAAATCTTCCATGTCTTCATCACTCTGAAGAT                            | <i>Δsaci0545</i> upstr rev ol                        |
| 1537                                | CAGAGTGATGAAGACATGGAAGATTTTATGATAGA                            | <i>Δsaci0545</i> downstr fw ol                       |
| 1538                                | CAAA <u>ACTGCAGAGC</u> CTTATGAATTAAGCTC                        | <i>Δsaci0545</i> downstr rev <i>Pst</i> I            |
| 1553                                | AACTCATAGCGTGAGATCC                                            | <i>Δsaci0545</i> check primer fw                     |
| 1554                                | ATCCAGCTAATGCATGTTCC                                           | <i>Δsaci0545</i> check primer rev                    |
| <b>primers for pSVA1017</b>         |                                                                |                                                      |
| 1539                                | CCCCGGATCCGTATTTTCTTAAACCTTC                                   | <i>Δsaci0884</i> upstr fw <i>Bam</i> HI              |
| 1540                                | TGTCCTGCTATACTATAATGTTCCACAATATTGTGGT                          | <i>Δsaci0884</i> upstr rev ol                        |
| 1541                                | AATATTGTGAACATTATAGTATAGCAGACAAAAA                             | <i>Δsaci0884</i> downstr fw ol                       |
| 1542                                | CCCCCTGCAGCCATAACTTATCCTTAAT                                   | <i>Δsaci0884</i> downstr rev <i>Pst</i> I            |
| 1601                                | TTCCTGCCCACTGATATTCC                                           | <i>Δsaci0884</i> check primer fw                     |
| 1602.1                              | CGGTTGGTTAAATCAATTAG                                           | <i>Δsaci0884</i> check primer rev                    |
| <b>primers for pET15b_Saci_0545</b> |                                                                |                                                      |
| 1602.2                              | AAACATATGATGTATTGGGTAAAAAAGCATGTC                              | <i>Saci0545</i> expr. fw <i>Nde</i> I                |
| 1603.1                              | AAAGGATCCTCATAAAATCTTCCATTATCTTTTCAT                           | <i>Saci0545</i> expr. rev <i>Bam</i> HI              |
| <b>primers for pSVA1037</b>         |                                                                |                                                      |
| 1599                                | GGGCCATGGCTAACATTGAAGAAACGTATGAG                               | <i>Saci0884</i> expr. fw <i>Nco</i> I                |
| 1600                                | GGGGATCCTTAGTGGTGATGATGGTGATGTACTATCTTCTAT<br>TAGTTGATCGTTCCAC | <i>Saci0884</i> expr. rev <i>Bam</i> HI with His-tag |
| <b>Primers for pSVA1064</b>         |                                                                |                                                      |
| 1604                                | GGCCGCGGCGTCAATTGAATTAAGTATGG                                  | <i>saci0884</i> compl fw <i>Sac</i> II               |
| 1603.2                              | GGGCGGCCGCTATACTATCTTCTTATTAGTTGATCG                           | <i>saci0884</i> compl rev <i>Eag</i> I               |
| <b>Quantitative RT-PCR primers</b>  |                                                                |                                                      |
| 1480                                | CCTGCAACATCTATCCATAACATACCGA                                   | <i>secY</i> -housekeep-qRT-PCR-fw                    |
| 1481                                | CCTCATAGTGTATATGCTTTAGTAGTAG                                   | <i>secY</i> -housekeep-qRT-PCR-rev                   |
| 1424                                | ACTGCGTCTACTGCGTTATCTTTATC                                     | <i>flaB</i> -qRT-PCR-fw                              |
| 1425                                | GGAGATAAGTCTACACTAGATACACCAGAA                                 | <i>flaB</i> -qRT-PCR-rev                             |
| 1426                                | GCAGTTGAAGAGTTAGCCTTATCTGTG                                    | <i>flaX</i> -qRT-PCR-fw                              |
| 1427                                | CCTACTAACTGACTTACGGTACTAATCT                                   | <i>flaX</i> -qRT-PCR-rev                             |
| 1428                                | CCTGGCTGTAGTGAATTAGATGTAAC TG                                  | <i>flaG</i> -qRT-PCR-fw                              |
| 1429                                | GTGTAGTGTATTTCCGGTCCAAATGGTCA                                  | <i>flaG</i> -qRT-PCR-rev                             |
| 2308                                | CTCTAACCCCTAGCCCTTATTATTGGAC                                   | <i>flaF</i> -qRT-PCR-fw                              |
| 2309                                | GGATACGGAGGATATGCCAGAATGAT                                     | <i>flaF</i> -qRT-PCR-rev                             |
| 1432                                | AGTTGATGTGTATCTTAAGCTCTCGG                                     | <i>flaH</i> -qRT-PCR-fw                              |



---

|             |                                |                          |
|-------------|--------------------------------|--------------------------|
| <b>1433</b> | CTGAACCAGATATTCCTCCTGTAGTTTTTA | <i>flaH</i> -qRT-PCR-rev |
| <b>1434</b> | GGAGAAACCGCATCTGGAAAGACAAC     | <i>flaI</i> -qRT-PCR-fw  |
| <b>1435</b> | GGAACCGTCAATTCTGGAGTGTCTT      | <i>flaI</i> -qRT-PCR-rev |
| <b>1436</b> | CCAGAAAGGAGCAGAACGGTAGG        | <i>flaJ</i> -qRT-PCR-fw  |
| <b>1437</b> | GCTATTACCGAAGCCAATTCACCAATC    | <i>flaJ</i> -qRT-PCR-rev |
| <b>4309</b> | TAGTGTGCTGCTGCTAGAG            | <i>soxB</i> -qRT-PCR-fw  |
| <b>4310</b> | ATTGCAGACTGCAGCGTTTG           | <i>soxB</i> -qRT-PCR-rev |
| <b>4311</b> | TGGGTATCTGGTGTACTTG            | <i>cbsA</i> -qRT-PCR-fw  |
| <b>4312</b> | AGCCGTGATTTCCAATATCC           | <i>cbsA</i> -qRT-PCR-rev |
| <b>4313</b> | CCCTAAACGTGCCAAATGAGGG         | <i>cbsB</i> -qRT-PCR-fw  |
| <b>4314</b> | CAGAGATGCGGTAATCAATGTC         | <i>cbsB</i> -qRT-PCR-rev |
| <b>4315</b> | AGGCGATTTCGAGTGGGAGAC          | <i>soxL</i> -qRT-PCR-fw  |
| <b>4316</b> | GGCGGTGTACAACCCAGATG           | <i>soxL</i> -qRT-PCR-rev |
| <b>4317</b> | AGCAGTGACCTGGGCTATC            | <i>soxN</i> -qRT-PCR-fw  |
| <b>4318</b> | CGTAGTGCTCAGCCATGAAG           | <i>soxN</i> -qRT-PCR-rev |

---

**Table S6.** Strains and plasmids used in this study.

| Strains           | Genotype                                                                                                                                   | Source/<br>Reference |
|-------------------|--------------------------------------------------------------------------------------------------------------------------------------------|----------------------|
| Strains           |                                                                                                                                            |                      |
| DH5 $\alpha$      | <i>Escherichia coli</i> K-12 cloning strain<br>l2 f80d/lacZDM15 D(lacZYA-argF)U169 recA1 endA1 hsdR17 (rK2<br>mK1) supE44 thi-1 gyrA relA1 | Gibco                |
| Rosetta (DE3)     | <i>Escherichia coli</i> expression strain                                                                                                  | Novagen              |
| ER1821            | <i>Escherichia coli</i> propagation strain<br>F' glnV44 e14' (McrA') rfbD1? relA1? endA1 spoT1? thi-1 $\Delta$ (mcrC-<br>mrr)114::IS10     | New England Biolabs  |
| MW001             | <i>Sulfolobus acidocaldarius</i> DSM639 $\Delta$ pyrE                                                                                      | [1]                  |
| MW010             | MW001 $\Delta$ saci_ptp ( $\Delta$ saci0545)                                                                                               | This work            |
| MW025             | MW001 $\Delta$ saci_pp2a ( $\Delta$ saci0884)                                                                                              | This work            |
| MW156             | MW001 $\Delta$ saci2318 ( $\Delta$ aapF)                                                                                                   | [2]                  |
| MW455             | MW001 $\Delta$ saci2318 $\Delta$ saci1174 ( $\Delta$ aapF $\Delta$ flaH)                                                                   | [3]                  |
| Plasmids          |                                                                                                                                            |                      |
| pSVA406           | Gene targeting plasmid, pGEM-T Easy backbone, pyrEF <sub>SSO</sub> cassette;<br>single crossover method                                    | [1]                  |
| pSVA407           | Gene targeting plasmid, pGEM-T Easy backbone, pyrEF <sub>SSO</sub> and<br>lacS <sub>SSO</sub> cassette; single crossover method            | [1]                  |
| p $\Delta$ 2pyrEF | Gene targeting plasmid, pBluescript backbone, pyrEF <sub>SSO</sub> ; single<br>crossover method                                            | [4]                  |
| pSVA1016          | In-frame deletion of saci0545(saci_ptp) cloned into p $\Delta$ 2pyrEF with<br>BamH, PstI                                                   | This work            |
| pSVA1017          | In-frame deletion of saci0884 (saci_pp2ac) cloned into p $\Delta$ 2pyrEF<br>with BamH, PstI                                                | This work            |
| pCMalLacS         | pRN-1 based shuttle vector with lacS <sub>SSO</sub> reporter gene                                                                          | [5]                  |
| pSVA1064          | Complementation of saci0884 (saci_pp2ac) deletion with own<br>promoter, cloned into pCMal instead of lacS                                  | This work            |
| pETDuet-1         | Amp <sup>r</sup> , Car <sup>r</sup> , expression plasmid containing replicon ColE1 (pBR322)<br>and two MCS (MCS1 and MCS2)                 | Novagen              |
| pET-15b           | Amp <sup>r</sup> , expression plasmid containing N-terminal His-Tag sequence                                                               | Novagen              |
| pSVA1037          | saci0884 with C-terminal His-tag cloned into pETDuet-1 with NcoI,<br>BamHI in MCS1                                                         | [6]                  |
| pET15b_Saci_0545  | Saci0545 with N-terminal His-tag cloned into pET15b with NdeI,<br>BamHI                                                                    | This work            |

**Table S7** Supplementary table showing the scores of each phosphorylation site in proteins identified by our method. DISPHOS 1.3 (<http://www.dabi.temple.edu/disphos/pred.html>) was used to calculate the scores. For unknown reasons DISPHOS 1.3 fails to process the sequences of: Saci\_1499, Saci\_2190, Saci\_2201, Saci\_2215, Saci\_2331

## References

1. Wagner M, van Wolferen M, Wagner A, Lassak K, Meyer BH, et al. (2012) Versatile genetic tool box for the crenarchaeote *Sulfolobus acidocaldarius*. *Front Microbiol* 3:214.
2. Henche A-L, Koerdt A, Ghosh A, Albers S-V (2012) Influence of cell surface structures on crenarchaeal biofilm formation using a thermostable green fluorescent protein. *Environ Microbiol* 14: 779–793.
3. Lassak K, Neiner T, Ghosh A, Klingl A, Wirth R, et al. (2012) Molecular analysis of the crenarchaeal flagellum. *Mol Microbiol* 83: 110–124.
4. Wagner M, Berkner S, Ajon M, Driessen AJM, Lipps G, et al. (2009) Expanding and understanding the genetic toolbox of the hyperthermophilic genus *Sulfolobus*. *Biochem Soc Trans* 37: 97–101.
5. Berkner S, Wlodkowski A, Albers S-V, Lipps G (2010) Inducible and constitutive promoters for genetic systems in *Sulfolobus acidocaldarius*. *Extremophiles* 14: 249–259.
6. Reimann J, Lassak K, Khadouma S, Ettema TJG, Yang N, et al. (2012) Regulation of archaella expression by the FHA and von Willebrand domain-containing proteins ArnA and ArnB in *Sulfolobus acidocaldarius*. *Mol Microbiol* 86: 24-36.
