# Supplementary material
Source: PubMed Central journal article supplement (PMC3861733)
Supplement: supp_M113.027375_mcp.M113.027375-14.pdf [file supp_M113.027375_mcp.M113.027375-14.pdf]

dbValid true TIIFEI PHOS(1) 1. 817. -1.60499 6.23724 100. ? 2556.  
 S\_Acido\_new%gi|68567491|gb|AAY80420.1| TIIFEI%:PHOS:.....%sample\_2%compd\_1101

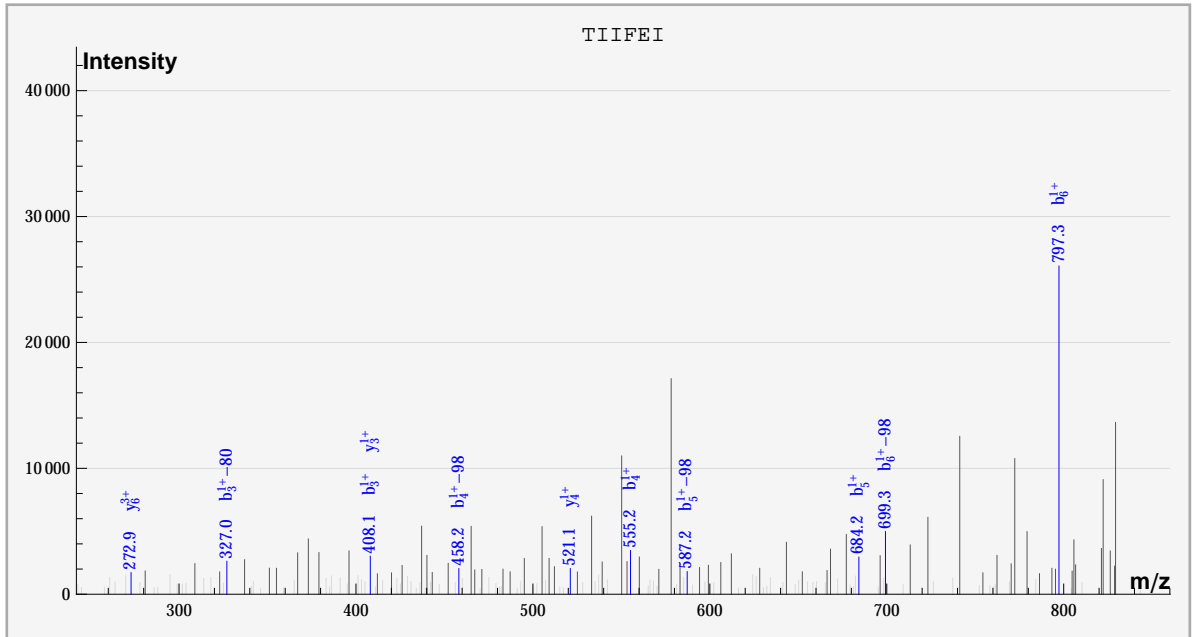

|   | # | b | b* | # | y | y* | P | P* |
|---|---|---|----|---|---|----|---|----|
| T | 1 |   |    |   |   |    | ✓ |    |
| I | 2 |   |    | 5 |   |    |   |    |
| I | 3 | ✓ | ✓  | 4 | ✓ |    |   |    |
| F | 4 | ✓ | ✓  | 3 | ✓ |    |   |    |
| E | 5 | ✓ | ✓  | 2 |   |    |   |    |
| I | 6 | ✓ | ✓  | 1 |   |    |   |    |

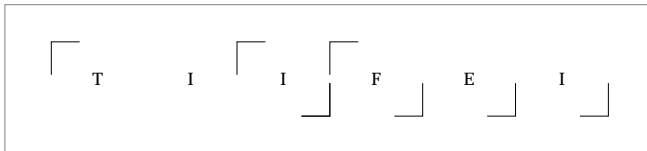

dbValid true TIIIFEI PHOS(1) 1. 817. -1.60499 6.16327 100. ? 2568.  
 S\_Acido\_new%gi|68567491|gb|AAY80420.1| TIIIFEI%:PHOS::::::%sample\_2%compd\_1111

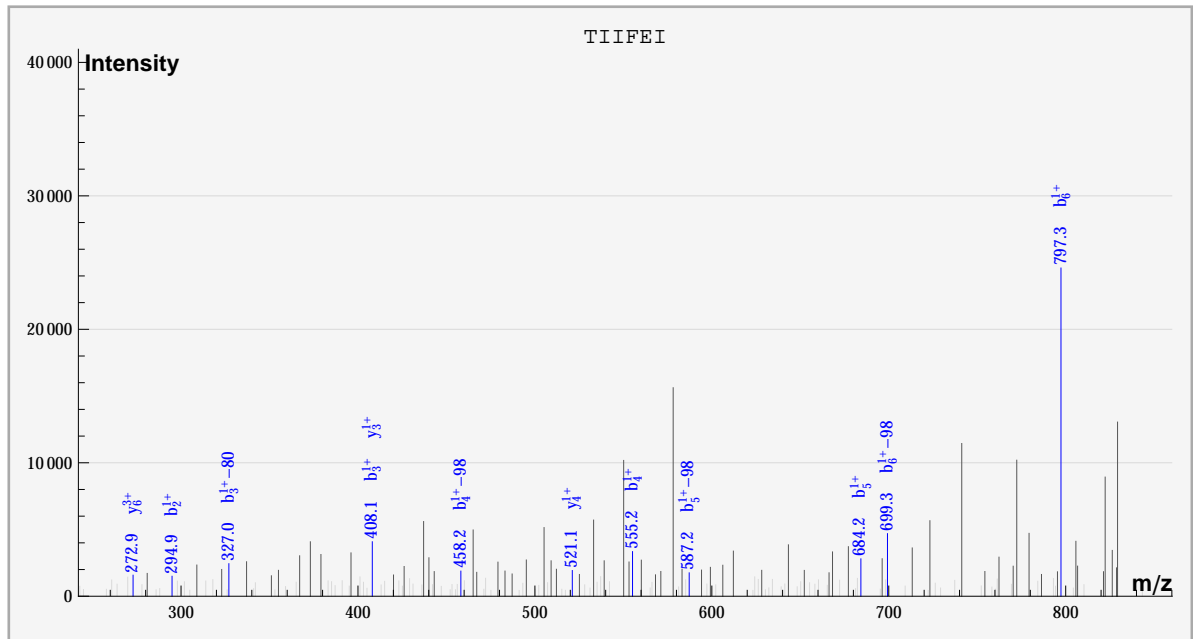

|   | # | b | b* | # | y | y* | P | P* |
|---|---|---|----|---|---|----|---|----|
| T | 1 |   |    |   |   |    | ✓ |    |
| I | 2 | ✓ |    | 5 |   |    |   |    |
| I | 3 | ✓ | ✓  | 4 | ✓ |    |   |    |
| F | 4 | ✓ | ✓  | 3 | ✓ |    |   |    |
| E | 5 | ✓ | ✓  | 2 |   |    |   |    |
| I | 6 | ✓ | ✓  | 1 |   |    |   |    |

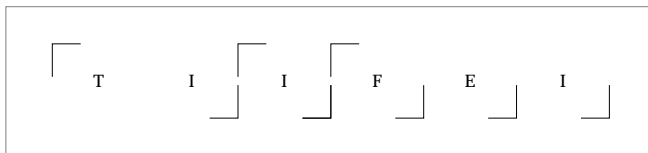

dbValid true TIIFEI PHOS(1) 1. 817. -1.60499 6.20973 100. ? 2580.  
 S\_Acido\_new%gi|68567491|gb|AAY80420.1| TIIFEI%:PHOS::::::%sample\_2%compd\_1121

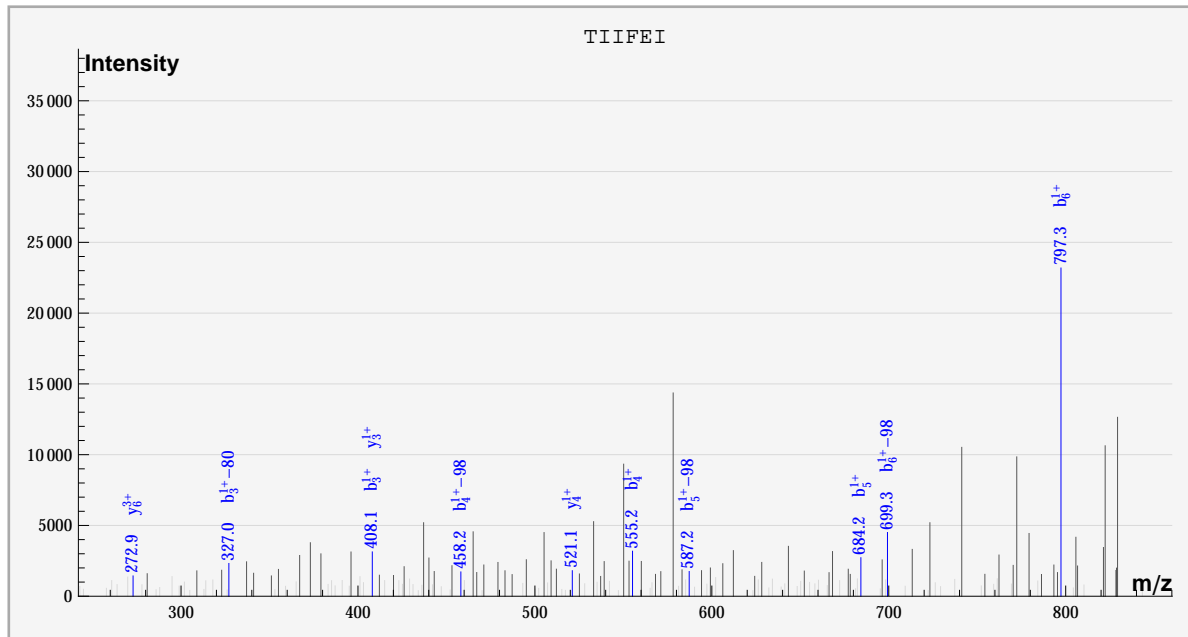

|   | # | b | b* | # | y | y* | P | P* |
|---|---|---|----|---|---|----|---|----|
| T | 1 |   |    |   |   |    | ✓ |    |
| I | 2 |   |    | 5 |   |    |   |    |
| I | 3 | ✓ | ✓  | 4 | ✓ |    |   |    |
| F | 4 | ✓ | ✓  | 3 | ✓ |    |   |    |
| E | 5 | ✓ | ✓  | 2 |   |    |   |    |
| I | 6 | ✓ | ✓  | 1 |   |    |   |    |

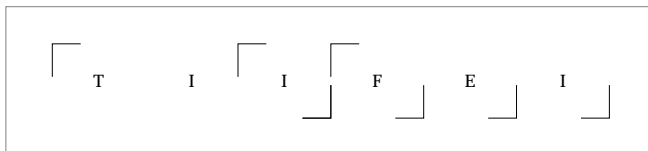

dbValid true TIIFEI PHOS(1) 1. 817. -1.60499 6.08561 100. ? 2592.  
 S\_Acido\_new%g|68567491|g|AAY80420.1| TIIFEI%:PHOS:.....%sample\_2%compd\_1131

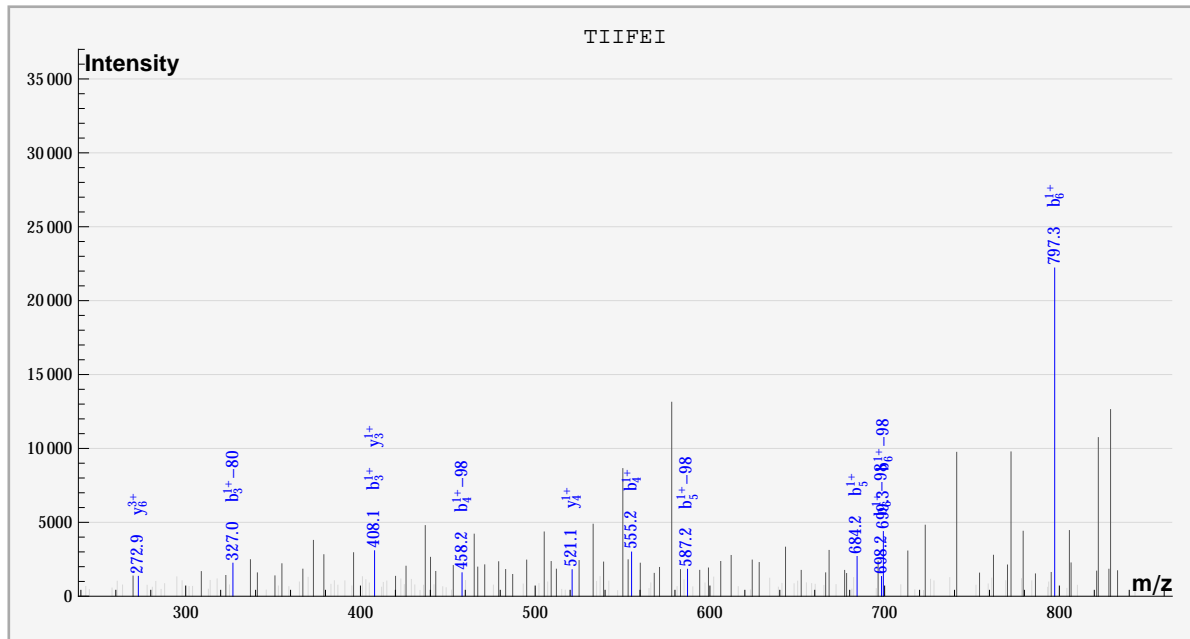

|   | # | b | b* | # | y | y* | P | P* |
|---|---|---|----|---|---|----|---|----|
| T | 1 |   |    |   |   |    | ✓ |    |
| I | 2 |   |    | 5 |   |    |   |    |
| I | 3 | ✓ | ✓  | 4 | ✓ |    |   |    |
| F | 4 | ✓ | ✓  | 3 | ✓ |    |   |    |
| E | 5 | ✓ | ✓  | 2 |   |    |   |    |
| I | 6 | ✓ | ✓  | 1 |   |    |   |    |



dbValid true TIIFEI PHOS(1) 1. 817. -1.60499 6.03468 100. ? 2604.  
 S\_Acido\_new%g|68567491|gb|AAY80420.1| TIIFEI%:PHOS:.....%sample\_2%compd\_1141

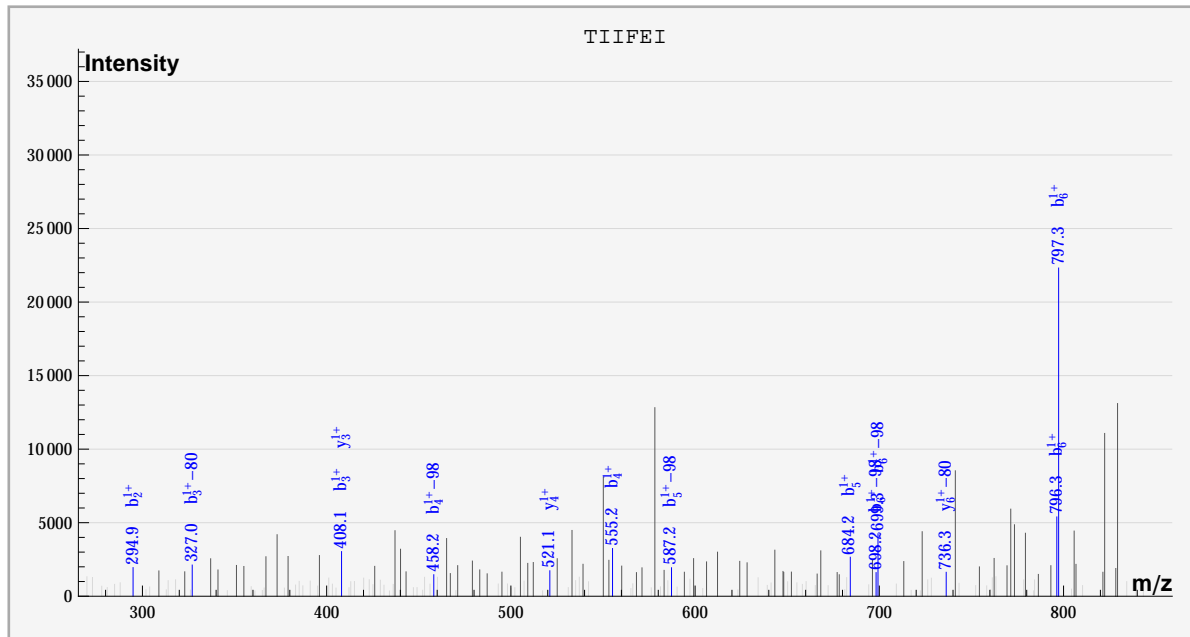

|   | # | b | b* | # | y | y* | P | P* |
|---|---|---|----|---|---|----|---|----|
| T | 1 |   |    |   |   |    |   | ✓  |
| I | 2 | ✓ |    | 5 |   |    |   |    |
| I | 3 | ✓ | ✓  | 4 | ✓ |    |   |    |
| F | 4 | ✓ | ✓  | 3 | ✓ |    |   |    |
| E | 5 | ✓ | ✓  | 2 |   |    |   |    |
| I | 6 | ✓ | ✓  | 1 |   |    |   |    |

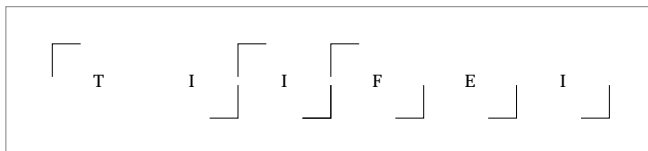

dbValid true TIIFEI PHOS(1) 1. 817. -1.60499 5.65592 100. ? 2616.  
 S\_Acido\_new%gi|68567491|gb|AAY80420.1| TIIFEI%:PHOS:.....%sample\_2%compd\_1151

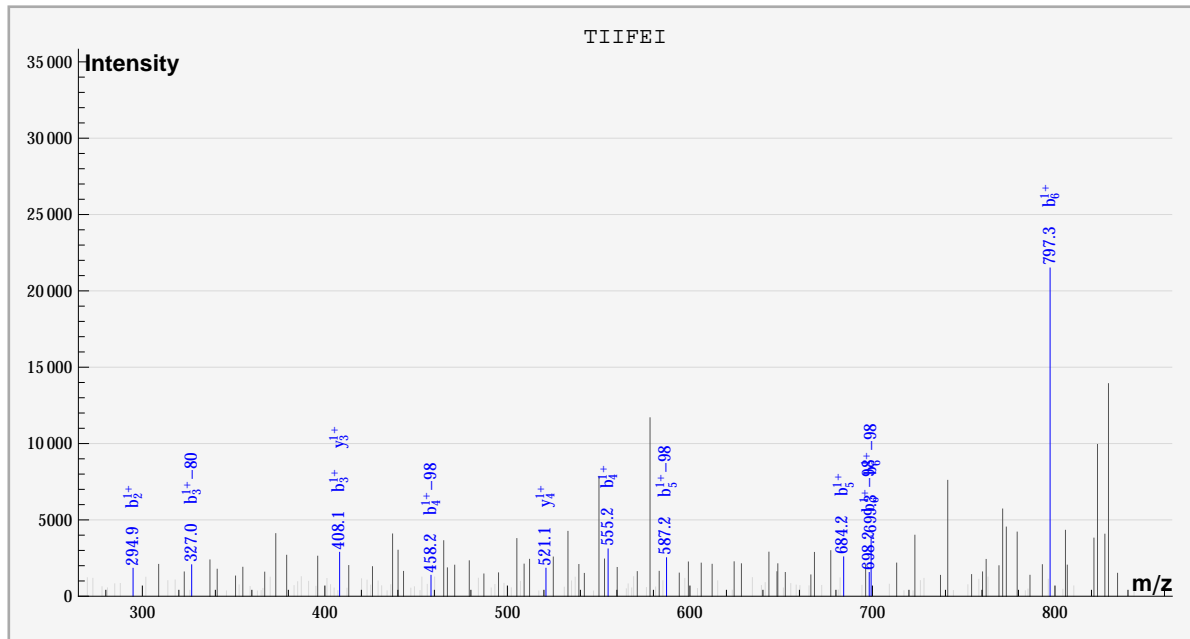

|   | # | b | b* | # | y | y* | P | P* |
|---|---|---|----|---|---|----|---|----|
| T | 1 |   |    |   |   |    |   |    |
| I | 2 | ✓ |    | 5 |   |    |   |    |
| I | 3 | ✓ | ✓  | 4 | ✓ |    |   |    |
| F | 4 | ✓ | ✓  | 3 | ✓ |    |   |    |
| E | 5 | ✓ | ✓  | 2 |   |    |   |    |
| I | 6 | ✓ | ✓  | 1 |   |    |   |    |

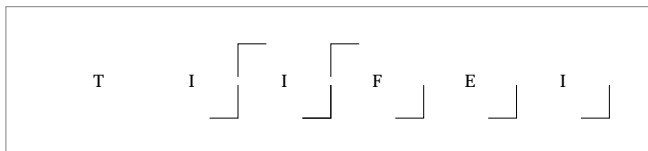

dbValid true TIIFEI PHOS(1) 1. 817. -1.60499 5.19776 100. ? 2628.  
 S\_Acido\_new%gi|68567491|gb|AAY80420.1| TIIFEI%:PHOS:.....%sample\_2%compd\_1161

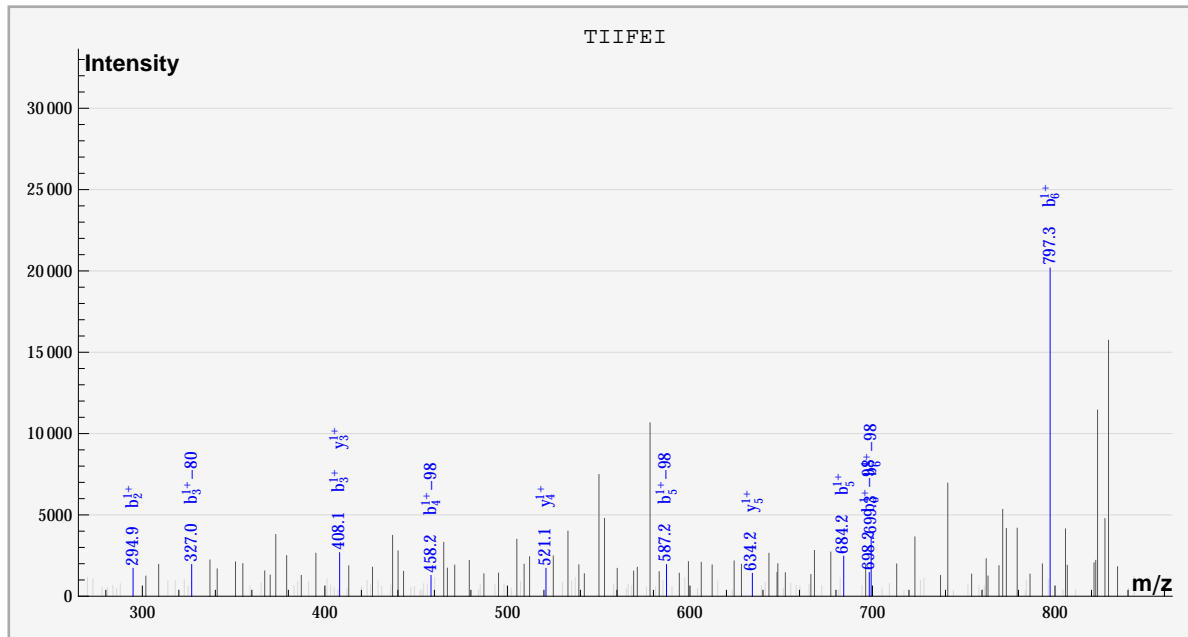

|   | # | b | b* | # | y | y* | P | P* |
|---|---|---|----|---|---|----|---|----|
| T | 1 |   |    |   |   |    |   |    |
| I | 2 | ✓ |    | 5 | ✓ |    |   |    |
| I | 3 | ✓ | ✓  | 4 | ✓ |    |   |    |
| F | 4 |   | ✓  | 3 | ✓ |    |   |    |
| E | 5 | ✓ | ✓  | 2 |   |    |   |    |
| I | 6 | ✓ | ✓  | 1 |   |    |   |    |

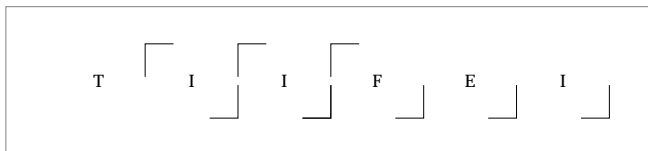

dbValid true TIIFEI PHOS(1) 1. 817. -1.60499 5.28696 100. ? 2646.  
 S\_Acido\_new%gi|68567491|gb|AAY80420.1| TIIFEI%:PHOS::::::%sample\_2%compd\_1171

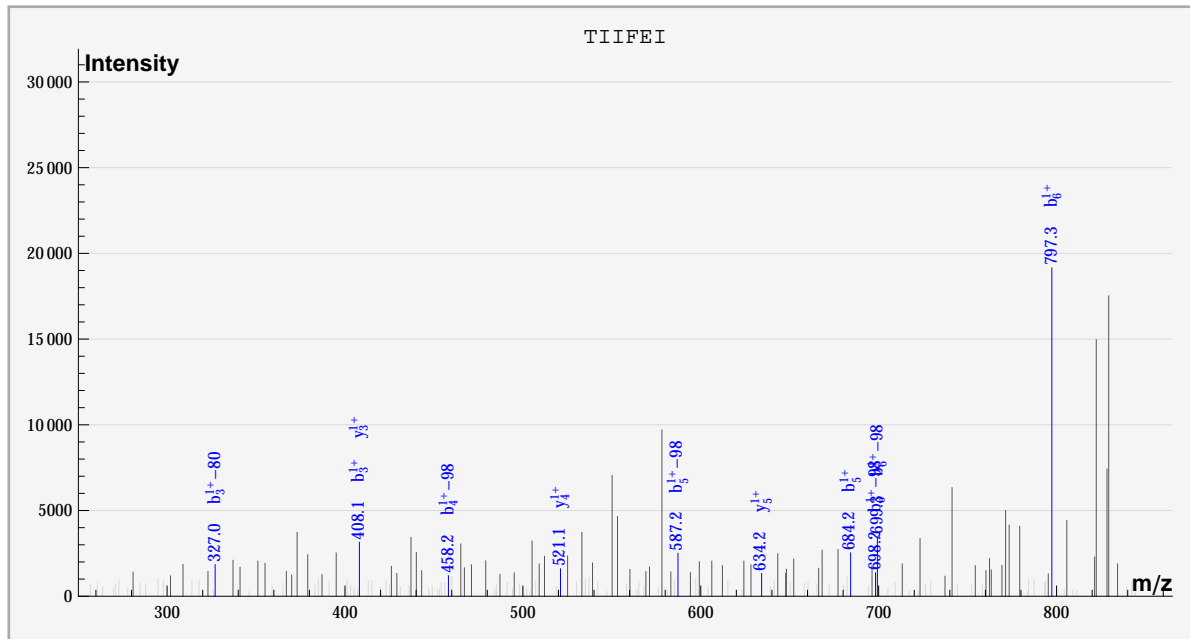

|   | # | b | b* | # | y | y* | P | P* |
|---|---|---|----|---|---|----|---|----|
| T | 1 |   |    |   |   |    |   |    |
| I | 2 |   |    | 5 | ✓ |    |   |    |
| I | 3 | ✓ | ✓  | 4 | ✓ |    |   |    |
| F | 4 |   | ✓  | 3 | ✓ |    |   |    |
| E | 5 | ✓ | ✓  | 2 |   |    |   |    |
| I | 6 | ✓ | ✓  | 1 |   |    |   |    |

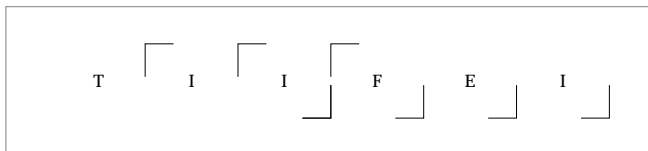



dbValid true TIIFEI PHOS(1) 1. 817. -1.60499 5.47304 100. ? 2658.  
 S\_Acido\_new%gi|68567491|gb|AAY80420.1| TIIFEI%:PHOS:::sample\_2%compd\_1181

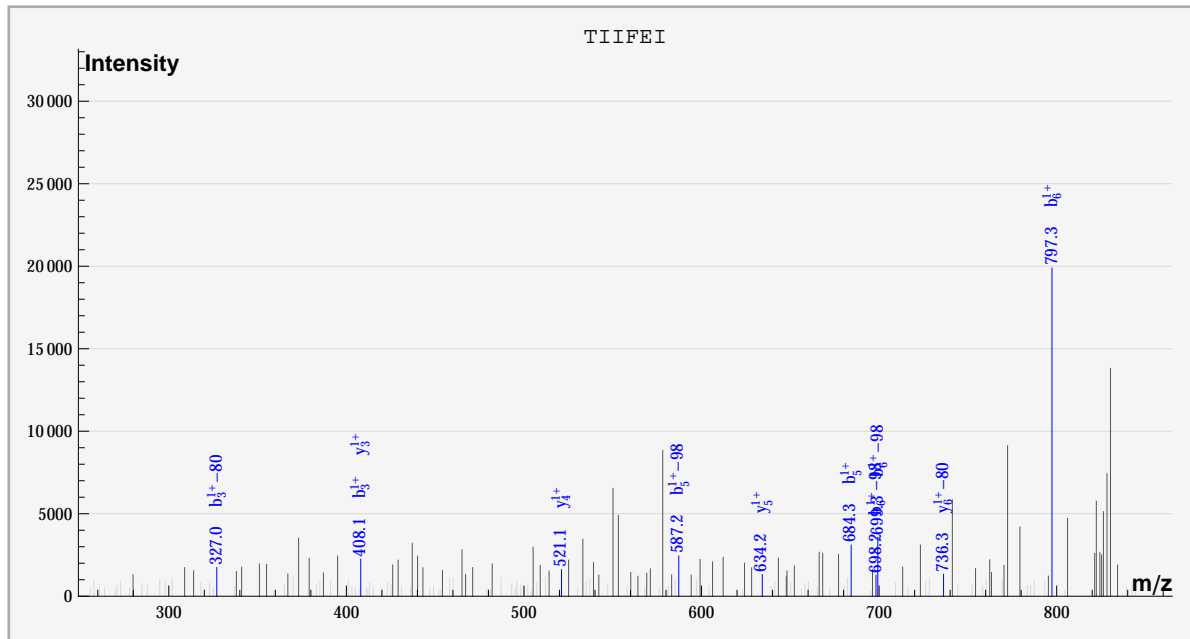

|   | # | b | b* | # | y | y* | P | P* |
|---|---|---|----|---|---|----|---|----|
| T | 1 |   |    |   |   |    |   | ✓  |
| I | 2 |   |    | 5 |   | ✓  |   |    |
| I | 3 | ✓ | ✓  | 4 |   | ✓  |   |    |
| F | 4 |   |    | 3 |   | ✓  |   |    |
| E | 5 | ✓ | ✓  | 2 |   |    |   |    |
| I | 6 | ✓ | ✓  | 1 |   |    |   |    |

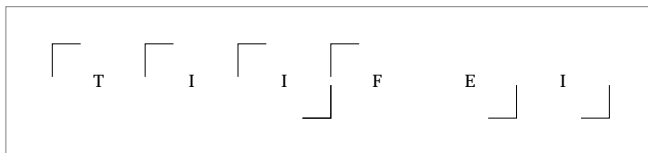

dbValid true TIIFEI PHOS(1) 1. 817. -1.60499 5.23037 100. ? 2664.  
 S\_Acido\_new%gi|68567491|gb|AAY80420.1| TIIFEI%:PHOS:::sample\_2%compd\_1192

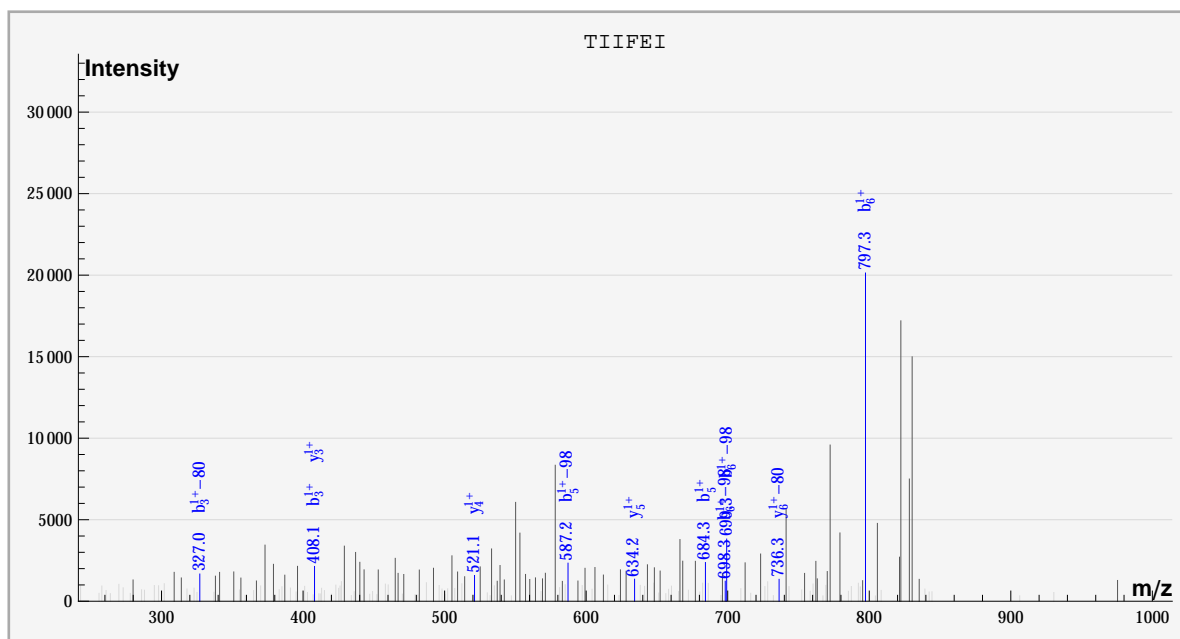

|   | # | b | b* | # | y | y* | P | P* |
|---|---|---|----|---|---|----|---|----|
| T | 1 |   |    |   |   |    |   | ✓  |
| I | 2 |   |    | 5 | ✓ |    |   |    |
| I | 3 | ✓ | ✓  | 4 | ✓ |    |   |    |
| F | 4 |   |    | 3 | ✓ |    |   |    |
| E | 5 | ✓ | ✓  | 2 |   |    |   |    |
| I | 6 | ✓ | ✓  | 1 |   |    |   |    |

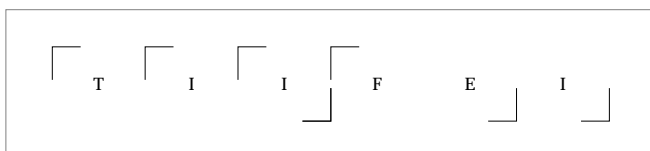

dbValid true TIIFEI PHOS(1) 1. 817. -1.60499 5.5055 100. ? 2712.  
 S\_Acido\_new%gi|68567491|gb|AAY80420.1| TIIFEI%:PHOS:.....%sample\_2%compd\_1233

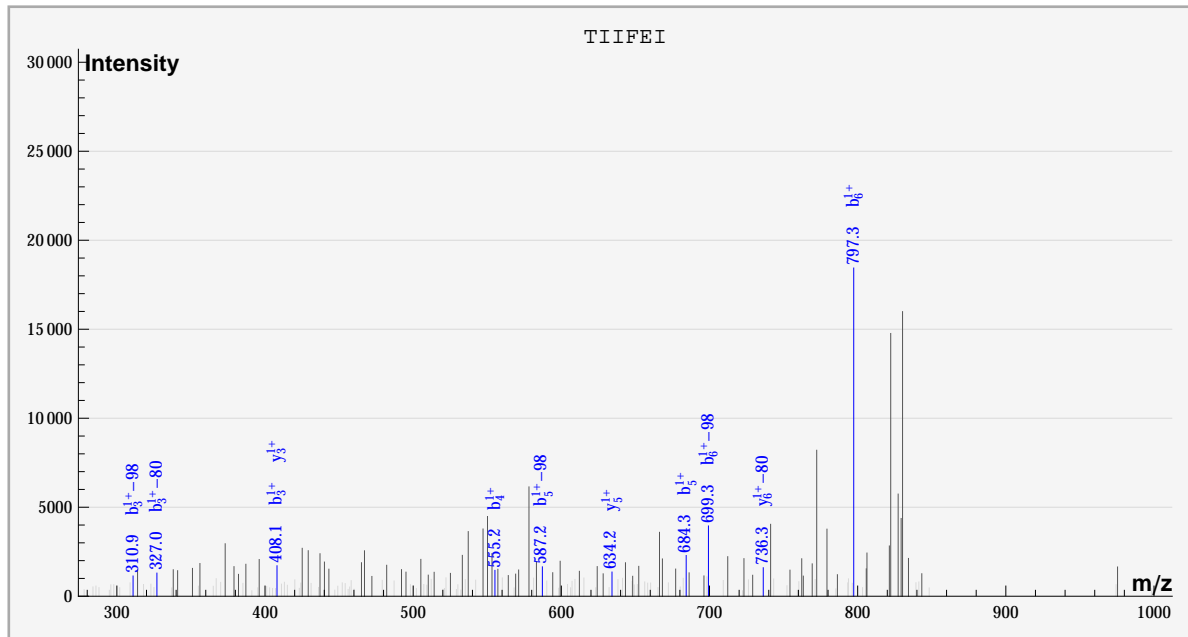

|   | # | b | b* | # | y | y* | P | P* |
|---|---|---|----|---|---|----|---|----|
| T | 1 |   |    |   |   |    |   | ✓  |
| I | 2 |   |    | 5 | ✓ |    |   |    |
| I | 3 | ✓ | ✓  | 4 |   |    |   |    |
| F | 4 | ✓ |    | 3 | ✓ |    |   |    |
| E | 5 | ✓ | ✓  | 2 |   |    |   |    |
| I | 6 | ✓ | ✓  | 1 |   |    |   |    |

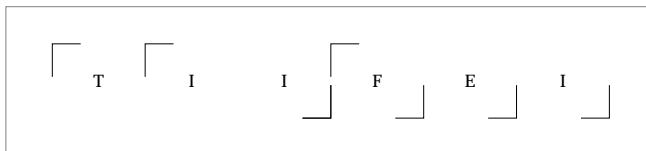

dbValid true TIIFEI PHOS(1) 1. 817. -1.60499 5.27545 100. ? 2784.  
 S\_Acido\_new%gi|68567491|gb|AAY80420.1| TIIFEI%:PHOS:.....%sample\_2%compd\_1293

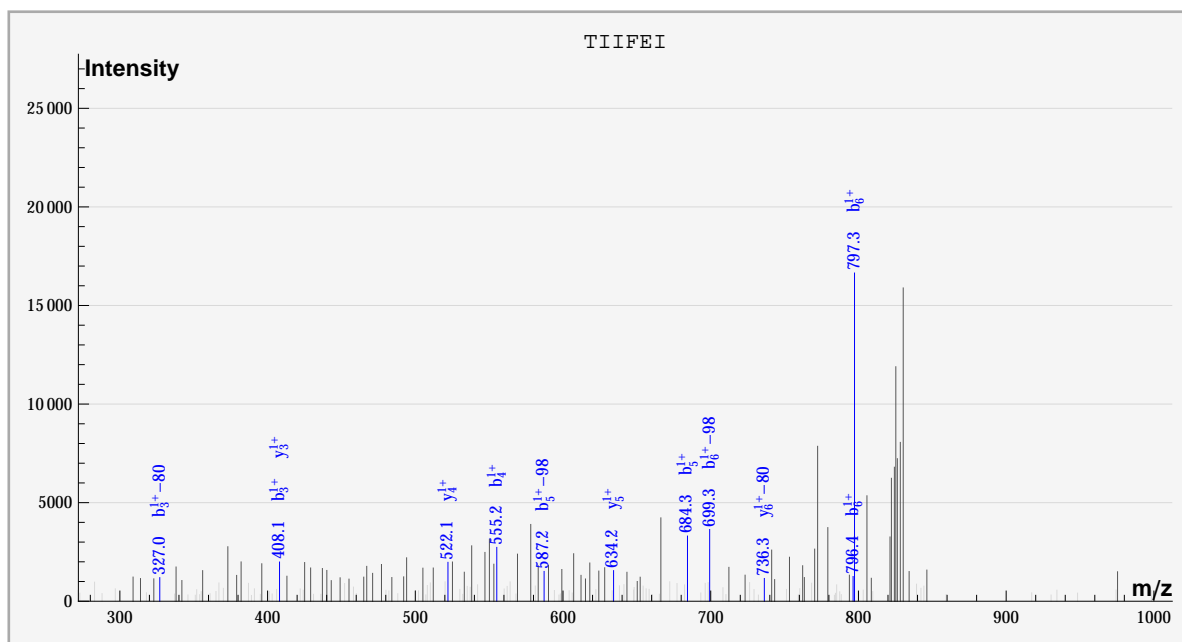

|   | # | b | b* | # | y | y* | P | P* |
|---|---|---|----|---|---|----|---|----|
| T | 1 |   |    |   |   |    |   | ✓  |
| I | 2 |   |    | 5 |   | ✓  |   |    |
| I | 3 | ✓ | ✓  | 4 |   | ✓  |   |    |
| F | 4 | ✓ |    | 3 |   | ✓  |   |    |
| E | 5 | ✓ | ✓  | 2 |   |    |   |    |
| I | 6 | ✓ | ✓  | 1 |   |    |   |    |

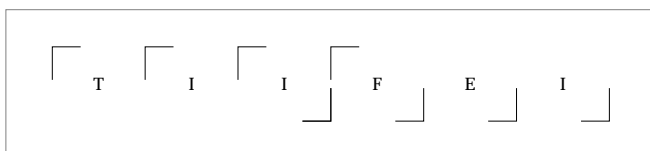

dbValid true TIIFEI PHOS(1) 1. 817. -1.60499 5.4096 100. ? 2796.  
 S\_Acido\_new%gi|68567491|gb|AAY80420.1| TIIFEI%:PHOS:.....%sample\_2%compd\_1303

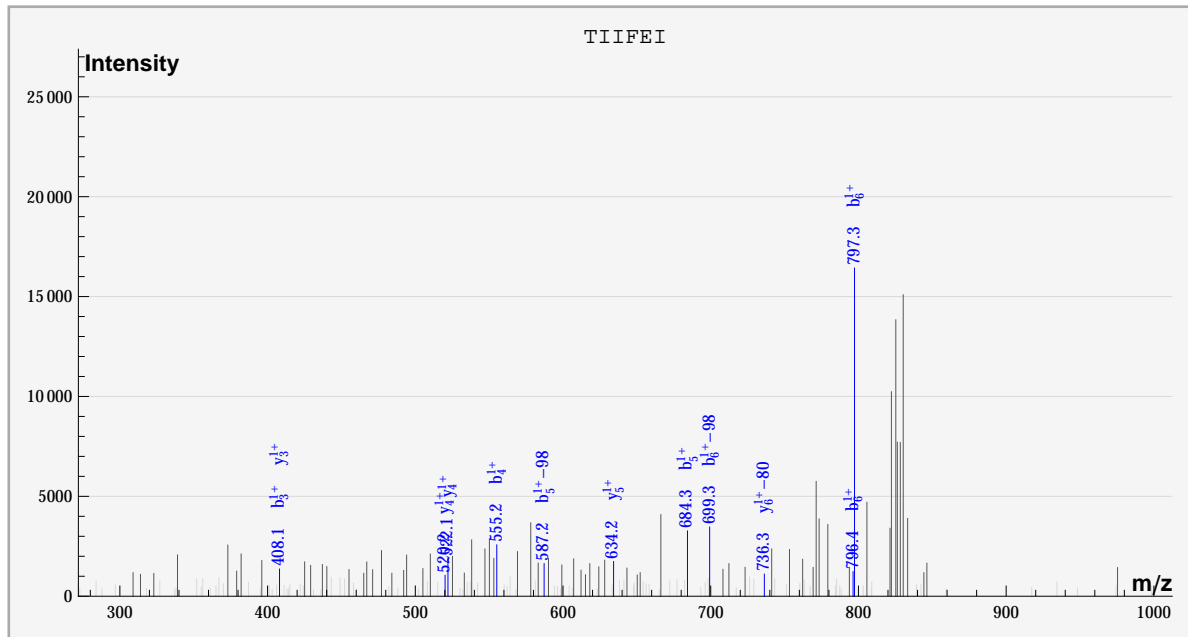

|   | # | b | b* | # | y | y* | P | P* |
|---|---|---|----|---|---|----|---|----|
| T | 1 |   |    |   |   |    |   | ✓  |
| I | 2 |   |    | 5 | ✓ |    |   |    |
| I | 3 | ✓ |    | 4 | ✓ |    |   |    |
| F | 4 | ✓ |    | 3 | ✓ |    |   |    |
| E | 5 | ✓ | ✓  | 2 |   |    |   |    |
| I | 6 | ✓ | ✓  | 1 |   |    |   |    |

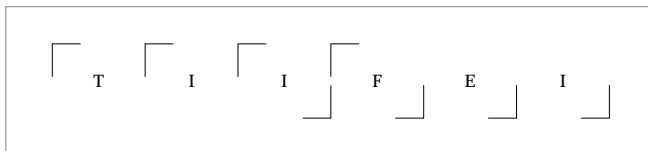

dbValid true TIIFEI PHOS(1) 1. 817. -1.60499 5.73362 100. ? 2808.  
 S\_Acido\_new%gi|68567491|gb|AAY80420.1| TIIFEI%:PHOS:.....%sample\_2%compd\_1314

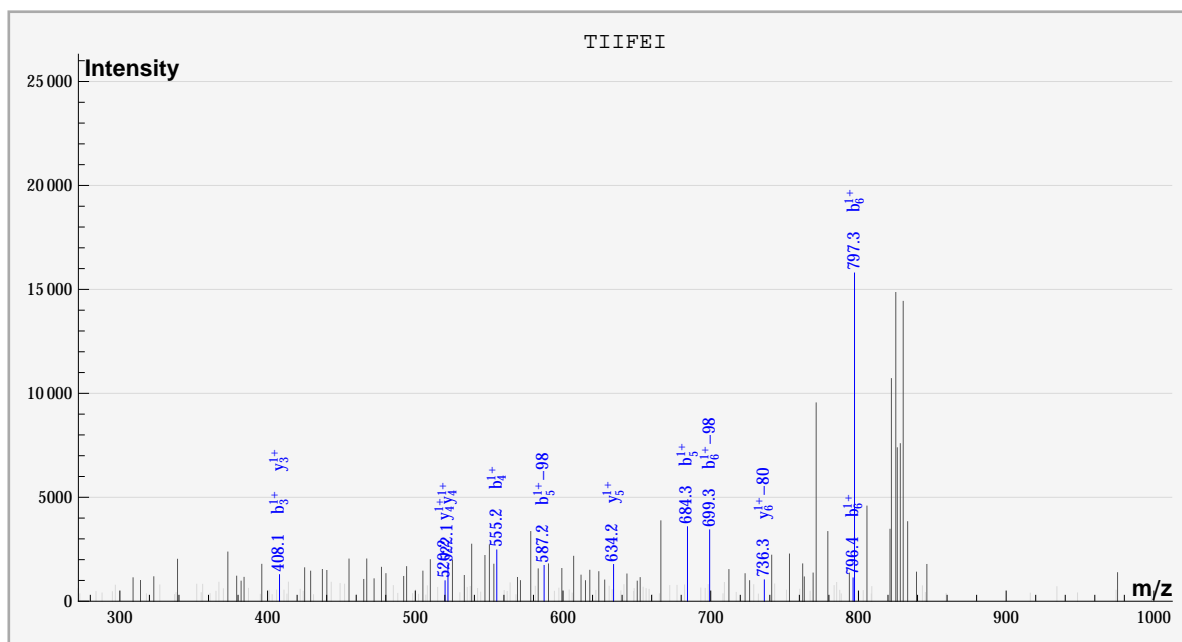

|   | # | b | b* | # | y | y* | P | P* |
|---|---|---|----|---|---|----|---|----|
| T | 1 |   |    |   |   |    |   | ✓  |
| I | 2 |   |    | 5 | ✓ |    |   |    |
| I | 3 | ✓ |    | 4 | ✓ |    |   |    |
| F | 4 | ✓ |    | 3 | ✓ |    |   |    |
| E | 5 | ✓ | ✓  | 2 |   |    |   |    |
| I | 6 | ✓ | ✓  | 1 |   |    |   |    |

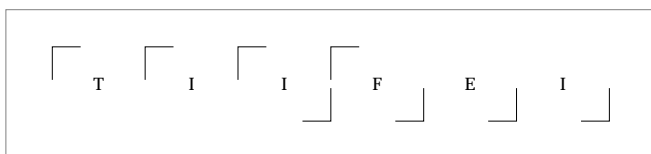

dbValid true TIFEI PHOS(1) 1. 817. -1.60499 5.84674 100. ? 2820.  
 S\_Acido\_new%gi|68567491|gb|AAY80420.1| TIFEI%:PHOS:.....%sample\_2%compd\_1324

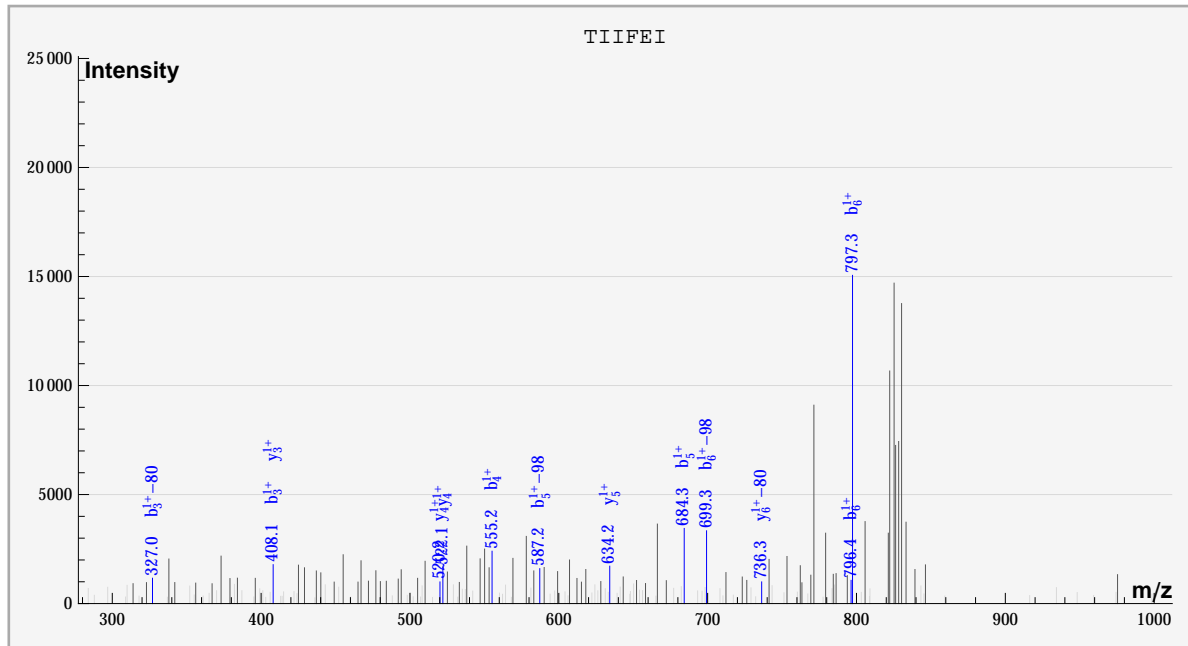

|   | # | b | b* | # | y | y* | P | P* |
|---|---|---|----|---|---|----|---|----|
| T | 1 |   |    |   |   |    |   | ✓  |
| I | 2 |   |    | 5 | ✓ |    |   |    |
| I | 3 | ✓ | ✓  | 4 | ✓ |    |   |    |
| F | 4 | ✓ |    | 3 | ✓ |    |   |    |
| E | 5 | ✓ | ✓  | 2 |   |    |   |    |
| I | 6 | ✓ | ✓  | 1 |   |    |   |    |

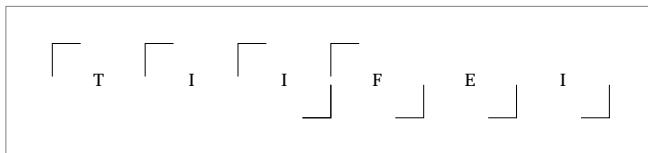

dbValid true TIIFEI PHOS(1) 1. 817. -1.60499 5.28644 100. ? 2832.  
 S\_Acido\_new%gi|68567491|gb|AAY80420.1| TIIFEI%:PHOS:.....%sample\_2%compd\_1334

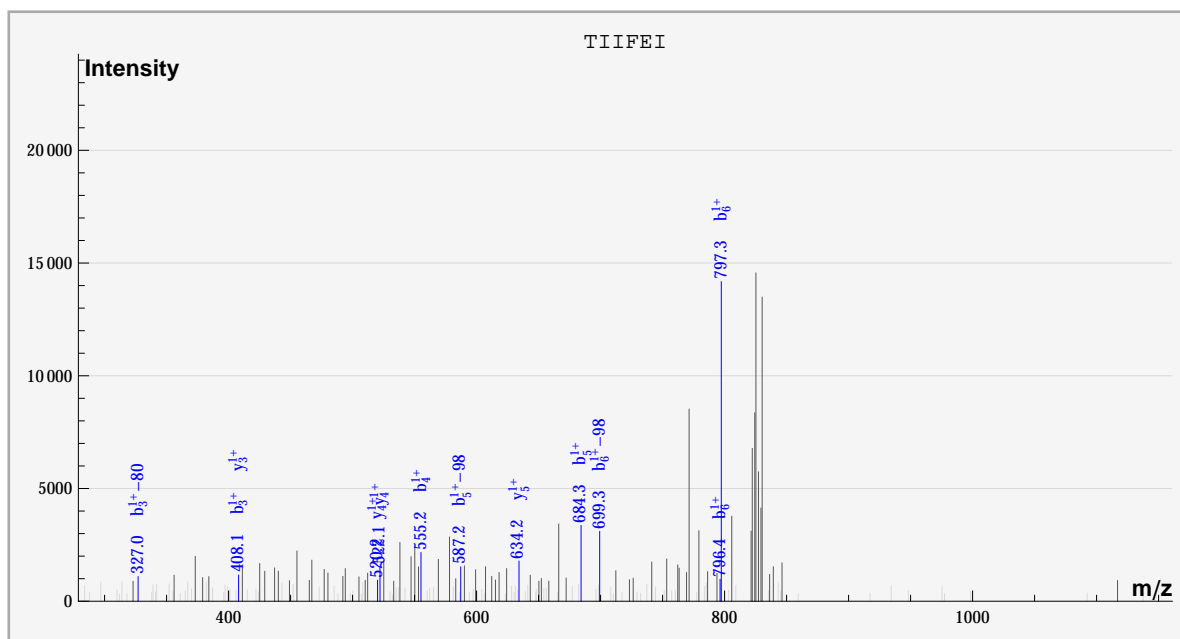

|   | # | b | b* | # | y | y* | P | P* |
|---|---|---|----|---|---|----|---|----|
| T | 1 |   |    |   |   |    |   |    |
| I | 2 |   |    | 5 | ✓ |    |   |    |
| I | 3 | ✓ | ✓  | 4 | ✓ |    |   |    |
| F | 4 | ✓ |    | 3 | ✓ |    |   |    |
| E | 5 | ✓ | ✓  | 2 |   |    |   |    |
| I | 6 | ✓ | ✓  | 1 |   |    |   |    |

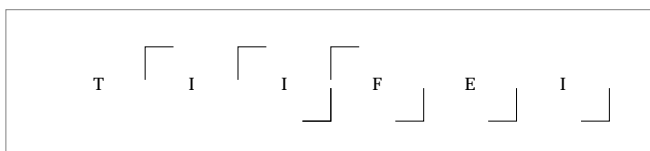



dbValid true TIIFEI PHOS(1) 1. 817. -1.60499 5.16156 100. ? 2844.  
 S\_Acido\_new%gi|68567491|gb|AAY80420.1| TIIFEI%:PHOS:.....%sample\_2%compd\_1344

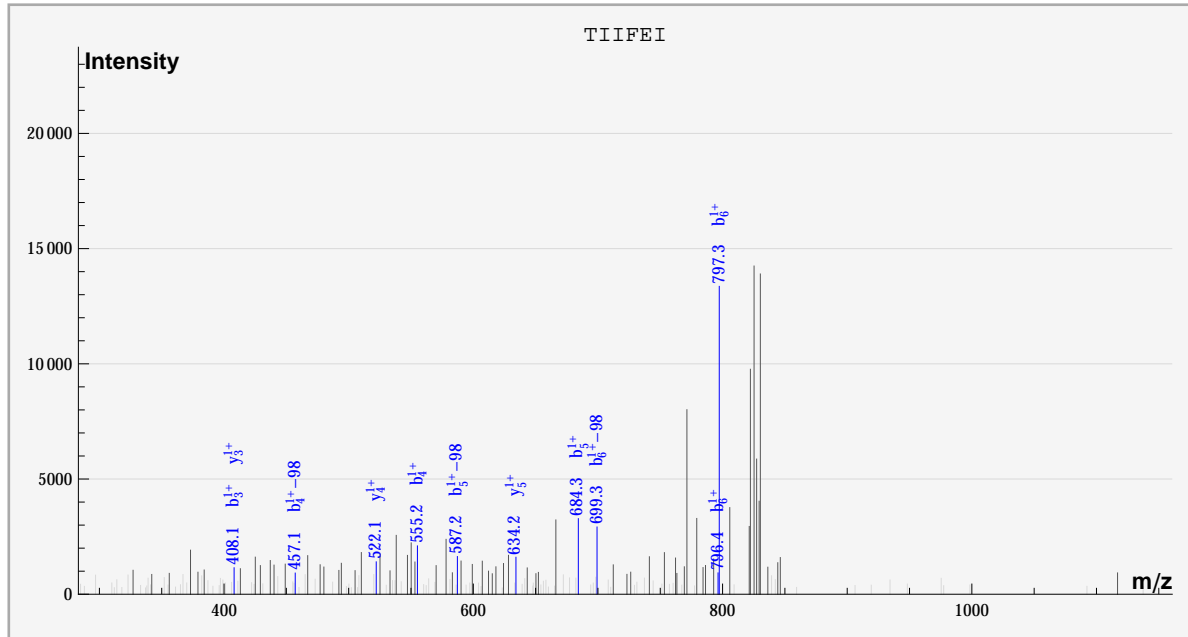

|   | # | b | b* | # | y | y* | P | P* |
|---|---|---|----|---|---|----|---|----|
| T | 1 |   |    |   |   |    |   |    |
| I | 2 |   |    | 5 |   | ✓  |   |    |
| I | 3 | ✓ |    | 4 |   | ✓  |   |    |
| F | 4 | ✓ | ✓  | 3 |   | ✓  |   |    |
| E | 5 | ✓ | ✓  | 2 |   |    |   |    |
| I | 6 | ✓ | ✓  | 1 |   |    |   |    |

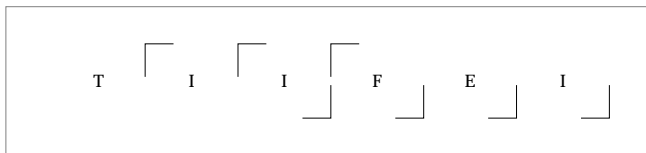

dbValid true TIIFEI PHOS(1) 1. 817. -1.60499 5.21399 100. ? 2856.  
 S\_Acido\_new%gi|68567491|gb|AAY80420.1| TIIFEI%:PHOS:::sample\_2%compd\_1354

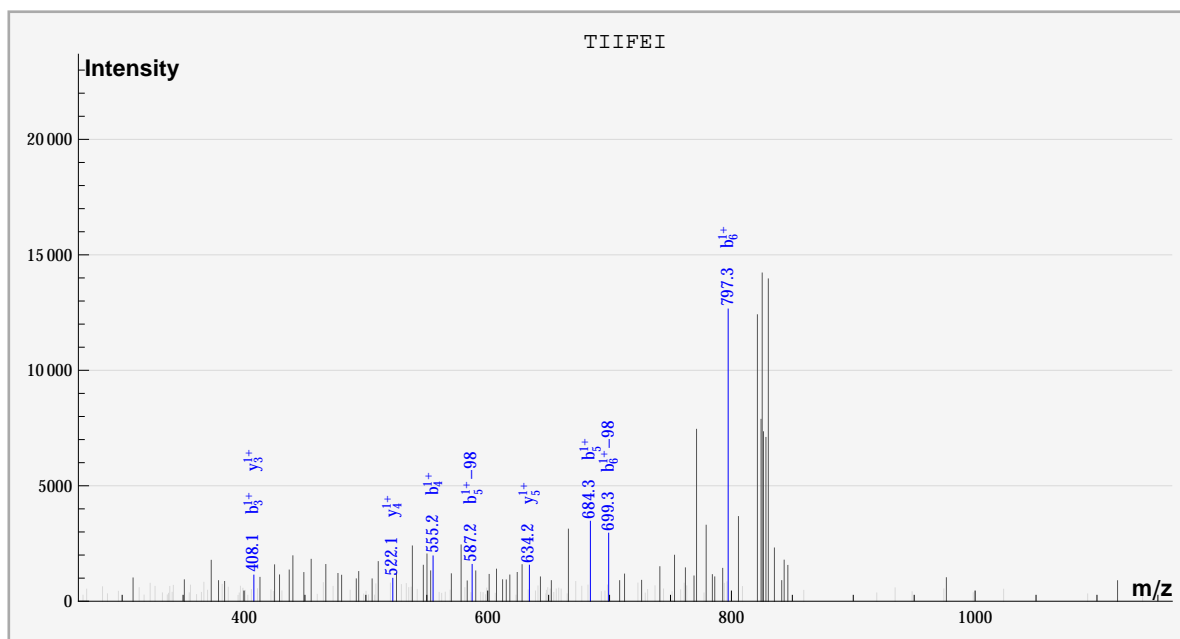

|   | # | b | b* | # | y | y* | P | P* |
|---|---|---|----|---|---|----|---|----|
| T | 1 |   |    |   |   |    |   |    |
| I | 2 |   |    | 5 | ✓ |    |   |    |
| I | 3 | ✓ |    | 4 | ✓ |    |   |    |
| F | 4 | ✓ |    | 3 | ✓ |    |   |    |
| E | 5 | ✓ | ✓  | 2 |   |    |   |    |
| I | 6 | ✓ | ✓  | 1 |   |    |   |    |

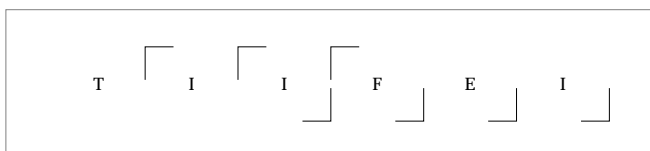

dbValid true TIIFEI PHOS(1) 1. 817. -1.60499 5.19131 100. ? 2868.  
 S\_Acido\_new%gi|68567491|gb|AAY80420.1| TIIFEI%:PHOS:.....%sample\_2%compd\_1364

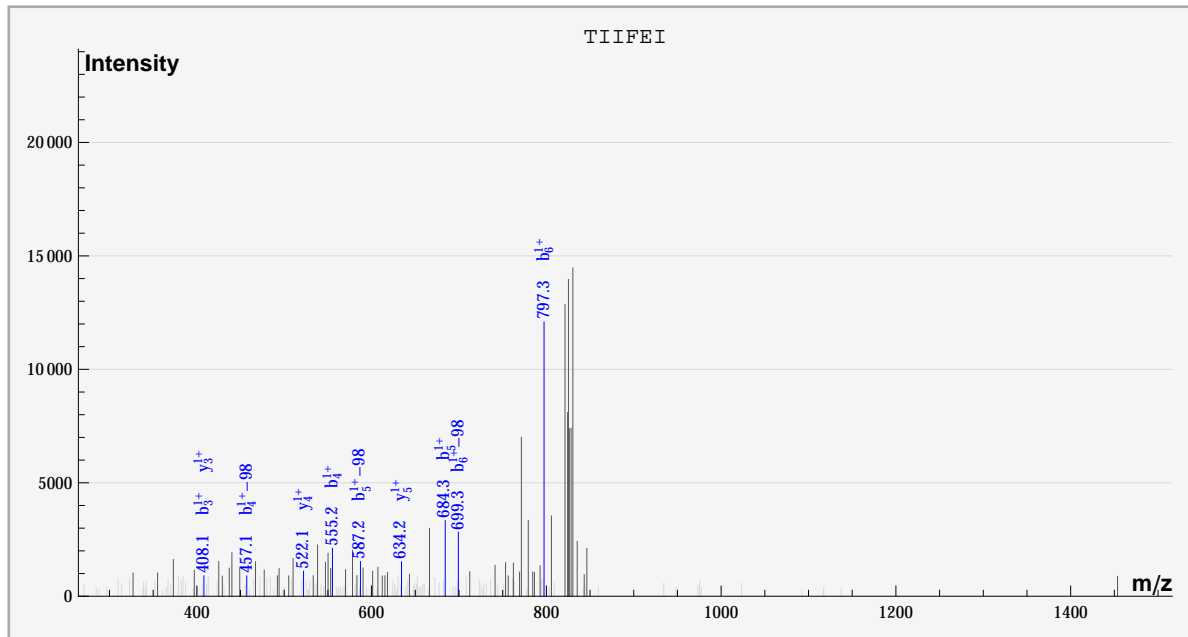

|   | # | b | b* | # | y | y* | P | P* |
|---|---|---|----|---|---|----|---|----|
| T | 1 |   |    |   |   |    |   |    |
| I | 2 |   |    | 5 | ✓ |    |   |    |
| I | 3 | ✓ |    | 4 | ✓ |    |   |    |
| F | 4 | ✓ | ✓  | 3 | ✓ |    |   |    |
| E | 5 | ✓ | ✓  | 2 |   |    |   |    |
| I | 6 | ✓ | ✓  | 1 |   |    |   |    |

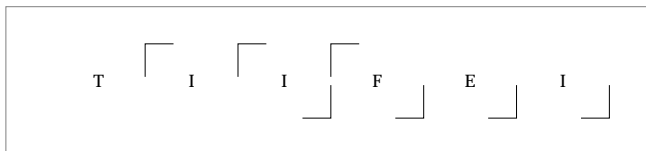

dbValid true AKPYSNDHLLIER PHOS(1) 2. 817.98 0.418142 5.26606 100. ? 2970.  
 S\_Acido\_new%gi|68568129|gb|AA81058.1| AKPYSNDHLLIER%:::PHOS:::sample\_1%cmpd\_1693

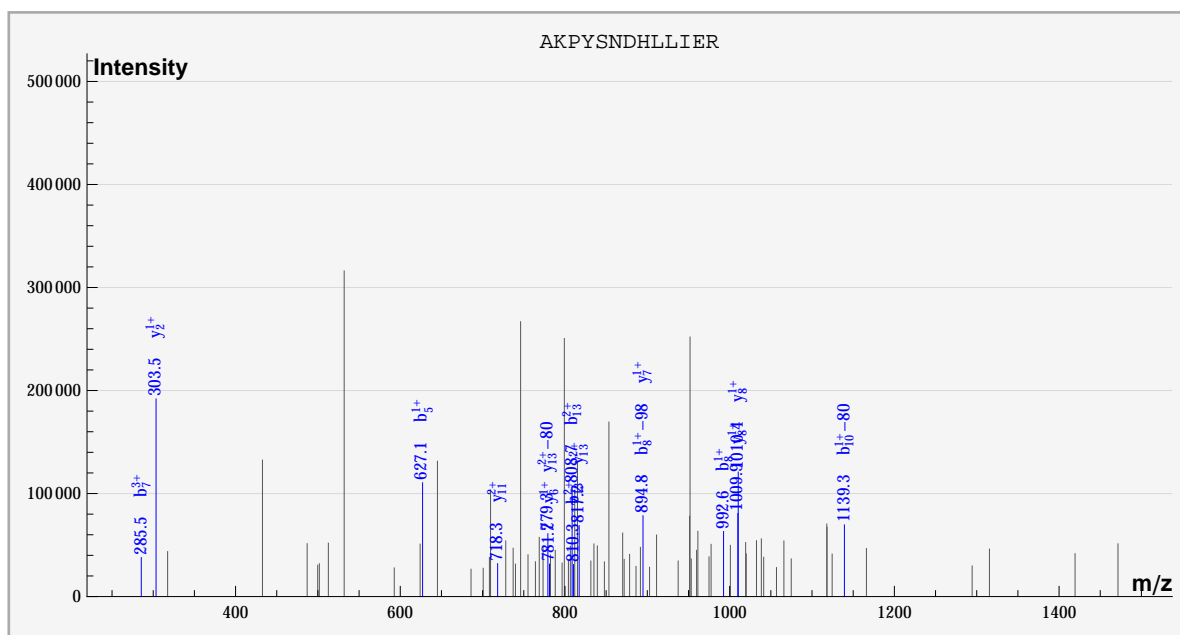

|   | #  | b | b* | #  | y | y* | P | P* |
|---|----|---|----|----|---|----|---|----|
| A | 1  |   |    |    |   |    | ✓ | ✓  |
| K | 2  |   |    | 12 |   |    |   |    |
| P | 3  |   |    | 11 | ✓ |    |   |    |
| Y | 4  |   |    | 10 |   |    |   |    |
| S | 5  | ✓ |    | 9  |   |    |   |    |
| N | 6  |   |    | 8  | ✓ |    |   |    |
| D | 7  | ✓ |    | 7  | ✓ |    |   |    |
| H | 8  | ✓ | ✓  | 6  | ✓ |    |   |    |
| L | 9  |   |    | 5  |   |    |   |    |
| L | 10 |   | ✓  | 4  |   |    |   |    |
| I | 11 |   |    | 3  |   |    |   |    |
| E | 12 |   |    | 2  | ✓ |    |   |    |
| R | 13 | ✓ |    | 1  |   |    |   |    |

「 A K 「 P Y S 」 N 「 D 」 H 」 L L 」 I 「 E R 」

dbValid true TGKELSAVKASFR PHOS(3) 2. 819. -1.65702 5.19141 100. ? 3198.

S\_Acido\_new%gi|68567450|gb|AAV80379.1| TGKELSAVKASFR%:PHOS:::PHOS:::PHOS:::sample\_1%compd\_1782

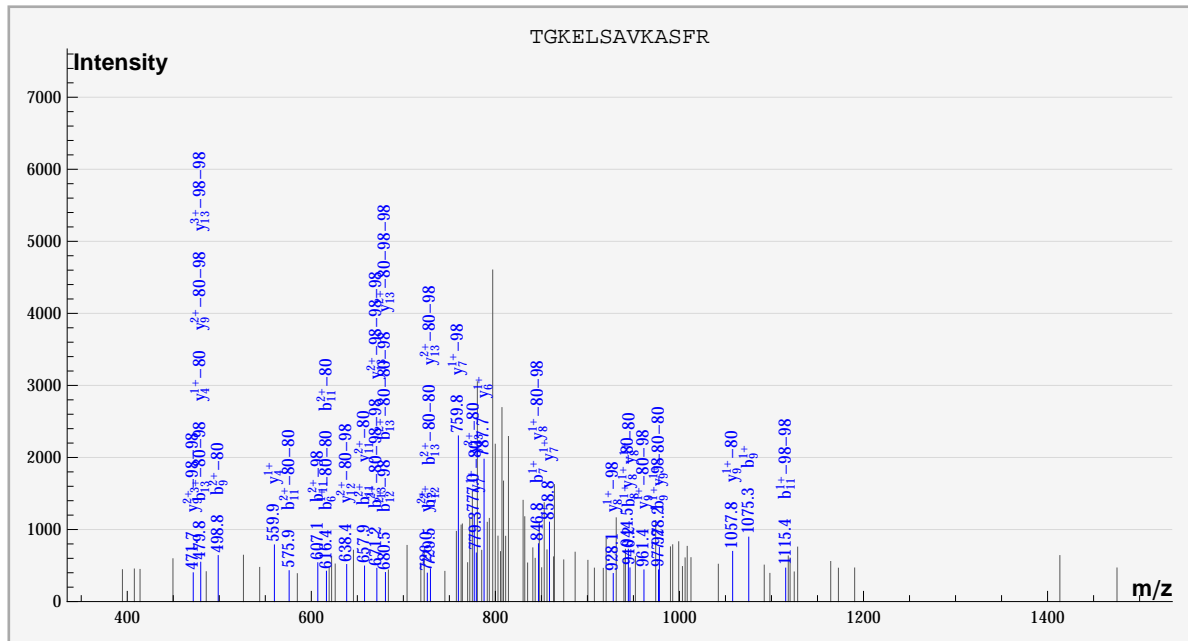

|   | #  | b | b* | #  | y | y* | P | P* |
|---|----|---|----|----|---|----|---|----|
| T | 1  |   |    |    |   |    |   | ✓  |
| G | 2  |   |    | 12 | ✓ | ✓  |   |    |
| K | 3  |   |    | 11 |   | ✓  |   |    |
| E | 4  |   |    | 10 |   |    |   |    |
| L | 5  |   |    | 9  |   | ✓  |   |    |
| S | 6  | ✓ | ✓  | 8  |   | ✓  |   |    |
| A | 7  | ✓ |    | 7  | ✓ | ✓  |   |    |
| V | 8  | ✓ |    | 6  | ✓ |    |   |    |
| K | 9  | ✓ | ✓  | 5  |   |    |   |    |
| A | 10 |   |    | 4  | ✓ | ✓  |   |    |
| S | 11 | ✓ | ✓  | 3  |   |    |   |    |
| F | 12 | ✓ | ✓  | 2  |   |    |   |    |
| R | 13 |   | ✓  | 1  |   |    |   |    |

T G K E L S A V K A S F R

dbValid true AVYTTGK PHOS(1) 1. 821. -1.63522 5.36406 100. ? 1956.  
 S\_Acido\_new%gi|68567334|gb|AAY80263.1| AVYTTGK%:::::PHOS:::%sample\_1%compd\_646

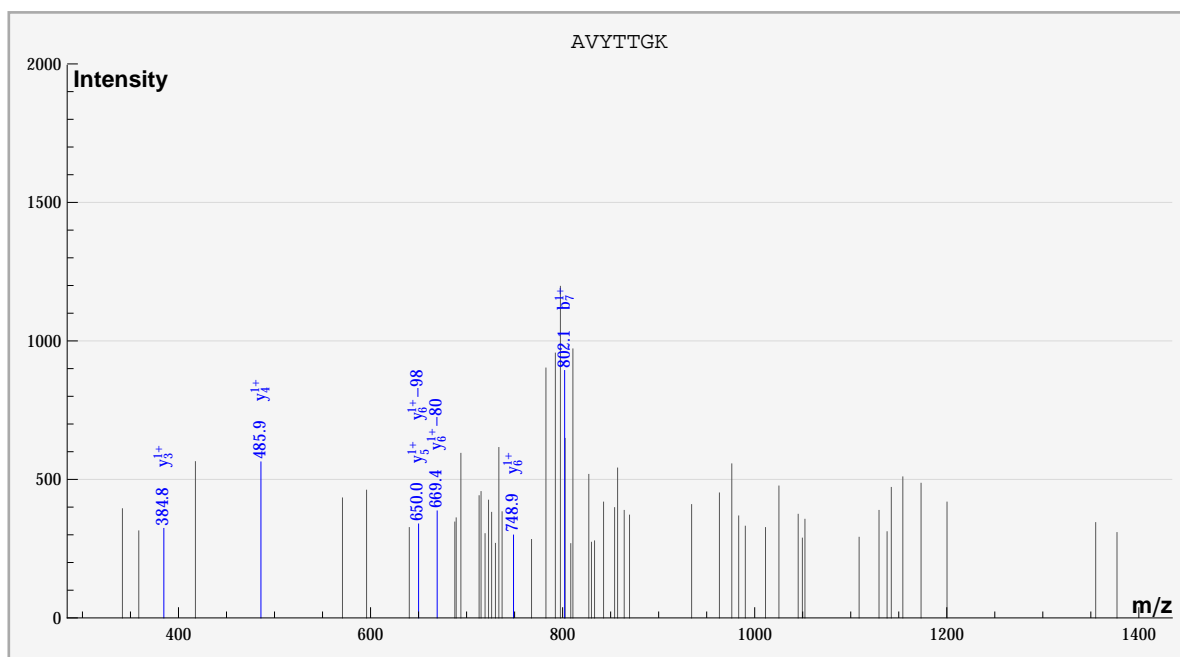

|   | # | b | b* | # | y | y* | P | P* |
|---|---|---|----|---|---|----|---|----|
| A | 1 |   |    |   |   |    |   |    |
| V | 2 |   |    | 6 | ✓ | ✓  |   |    |
| Y | 3 |   |    | 5 | ✓ |    |   |    |
| T | 4 |   |    | 4 | ✓ |    |   |    |
| T | 5 |   |    | 3 | ✓ |    |   |    |
| G | 6 |   |    | 2 |   |    |   |    |
| K | 7 | ✓ |    | 1 |   |    |   |    |

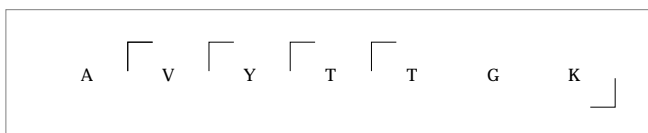

dbValid true VIYNLKTWSLSR PHOS(2) 2. 821. -0.614148 5.07663 100. ? 2028.

S\_Acido\_new%gi|68568606|gb|AAY81535.1| VIYNLKTWSLSR%:::PHOS:::PHOS::%sample\_1%compd\_712

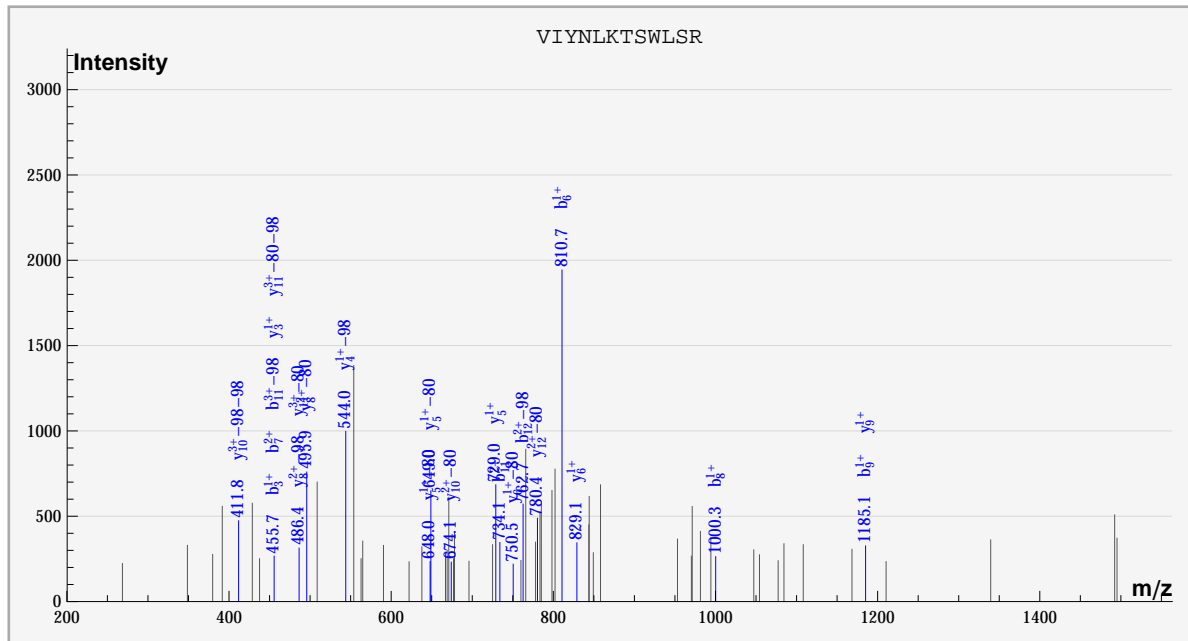

|   | #  | b | b* | #  | y | y* | P | P* |
|---|----|---|----|----|---|----|---|----|
| V | 1  |   |    |    |   |    |   | ✓  |
| I | 2  |   |    | 11 |   | ✓  |   |    |
| Y | 3  | ✓ |    | 10 |   | ✓  |   |    |
| N | 4  |   |    | 9  | ✓ |    |   |    |
| L | 5  |   |    | 8  |   | ✓  |   |    |
| K | 6  | ✓ |    | 7  |   |    |   |    |
| T | 7  | ✓ |    | 6  | ✓ | ✓  |   |    |
| S | 8  | ✓ |    | 5  | ✓ | ✓  |   |    |
| W | 9  | ✓ |    | 4  |   | ✓  |   |    |
| L | 10 |   |    | 3  | ✓ |    |   |    |
| S | 11 | ✓ | ✓  | 2  |   |    |   |    |
| R | 12 |   | ✓  | 1  |   |    |   |    |

VIYNLKTWSLSR

dbValid true RTMELYTETTR PHOS(3) 2. 822. -1.20498 5.32517 100. ? 2004.

S\_Acido\_new%gi|68567341|gb|AA80270.1| RTMELYTETTR%:::::PHOS:::PHOS:PHOS::%sample\_1%compd\_691

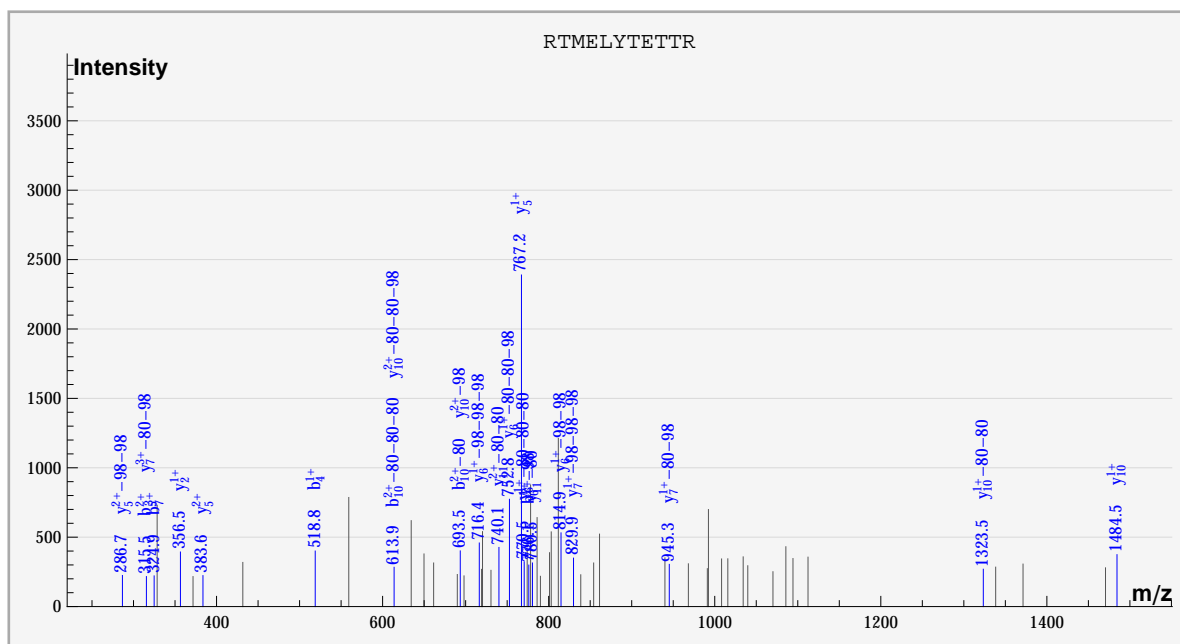

|   | #  | b | b* | #  | y | y* | P | P* |
|---|----|---|----|----|---|----|---|----|
| R | 1  |   |    |    |   |    |   | ✓  |
| T | 2  |   |    | 10 | ✓ | ✓  |   |    |
| M | 3  |   |    | 9  |   |    |   |    |
| E | 4  | ✓ |    | 8  |   |    |   |    |
| L | 5  | ✓ |    | 7  |   | ✓  |   |    |
| Y | 6  |   | ✓  | 6  |   | ✓  |   |    |
| T | 7  | ✓ |    | 5  | ✓ | ✓  |   |    |
| E | 8  |   |    | 4  |   |    |   |    |
| T | 9  |   |    | 3  |   |    |   |    |
| T | 10 |   | ✓  | 2  | ✓ |    |   |    |
| R | 11 |   |    | 1  |   |    |   |    |

RTMELYTETTR



dbValid true RHSKLFGTSDEQR PHOS(1) 2. 822. -1.11935 5.19789 100. ? 2580.  
 S\_Acido\_new%gi|68568342|gb|AAy81271.1| RHSKLFGTSDEQR%:::PHOS:::sample\_1%compd\_1211

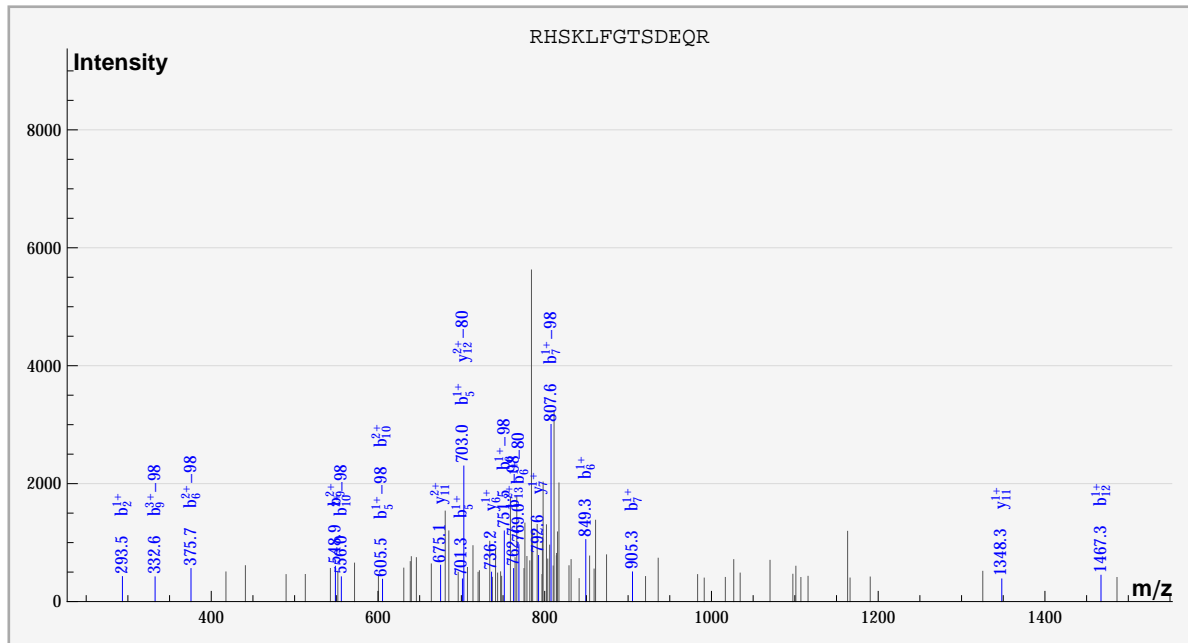

|   | #  | b | b* | #  | y | y* | P | P* |
|---|----|---|----|----|---|----|---|----|
| R | 1  |   |    |    |   |    |   |    |
| H | 2  | ✓ |    | 12 |   | ✓  |   |    |
| S | 3  |   |    | 11 | ✓ |    |   |    |
| K | 4  |   |    | 10 |   |    |   |    |
| L | 5  | ✓ | ✓  | 9  |   |    |   |    |
| F | 6  | ✓ | ✓  | 8  |   |    |   |    |
| G | 7  | ✓ | ✓  | 7  | ✓ |    |   |    |
| T | 8  |   |    | 6  | ✓ |    |   |    |
| S | 9  | ✓ | ✓  | 5  |   |    |   |    |
| D | 10 | ✓ | ✓  | 4  |   |    |   |    |
| E | 11 |   |    | 3  |   |    |   |    |
| Q | 12 | ✓ |    | 2  |   |    |   |    |
| R | 13 |   | ✓  | 1  |   |    |   |    |

R [ H ] S K L ] F ] G ] T S ] D ] E Q ] R ]

dbValid true INMITTVVVGNSR PHOS(3) 2. 822. 0.336847 5.26699 100. ? 2928.  
 S\_Acido\_new%gi|68566885|gb|AA79814.1| INMITTVVVGNSR%::::PHOS:PHOS::::PHOS::%sample\_1%compd\_1533

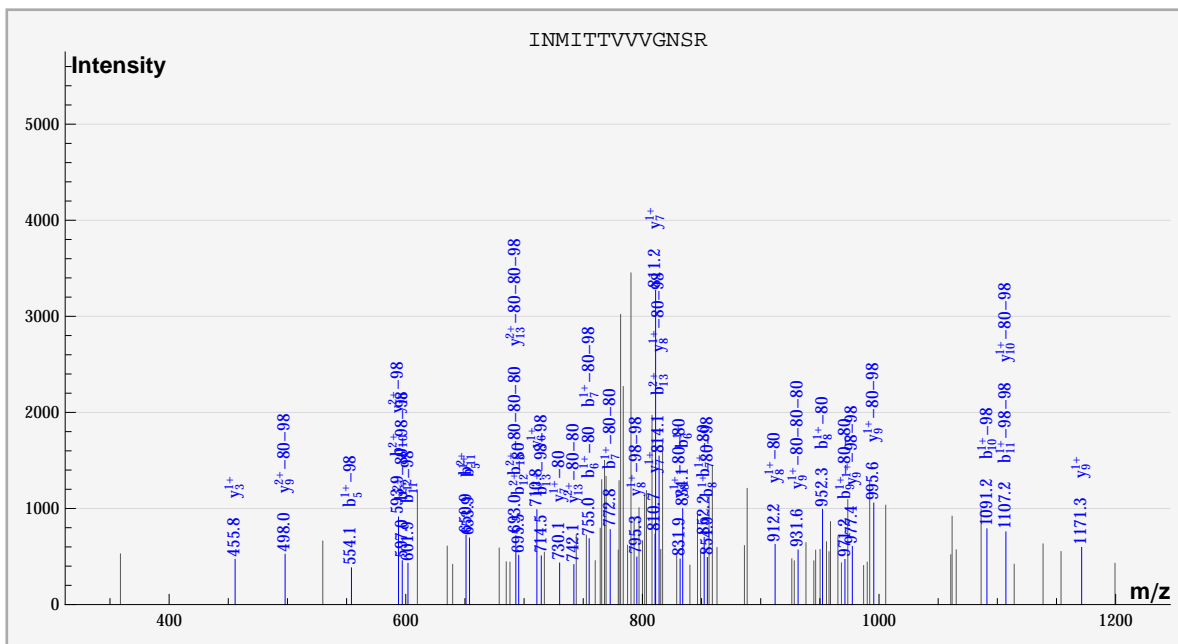

|   | #  | b | b* | #  | y | y* | P | P* |
|---|----|---|----|----|---|----|---|----|
| I | 1  |   |    |    |   |    |   | ✓  |
| N | 2  |   |    | 12 |   |    |   |    |
| M | 3  |   |    | 11 |   |    |   |    |
| I | 4  |   |    | 10 |   |    |   |    |
| T | 5  | ✓ | ✓  | 9  | ✓ | ✓  |   |    |
| T | 6  | ✓ | ✓  | 8  |   |    |   |    |
| V | 7  |   | ✓  | 7  | ✓ | ✓  |   |    |
| V | 8  |   | ✓  | 6  | ✓ |    |   |    |
| V | 9  |   | ✓  | 5  |   |    |   |    |
| G | 10 | ✓ | ✓  | 4  |   |    |   |    |
| N | 11 | ✓ | ✓  | 3  | ✓ |    |   |    |
| S | 12 |   | ✓  | 2  |   |    |   |    |
| R | 13 | ✓ | ✓  | 1  |   |    |   |    |

I N M I T T V V V G N S R

dbValid true TTTLRAISGILKK PHOS(3) 2. 823. -1.60753 5.12575 100. ? 2394.

S\_Acido\_new%gi|68567379|gb|AA80308.1| TTTLRAISGILKK%:PHOS:PHOS:PHOS:.....%sample\_3%cmpd\_966

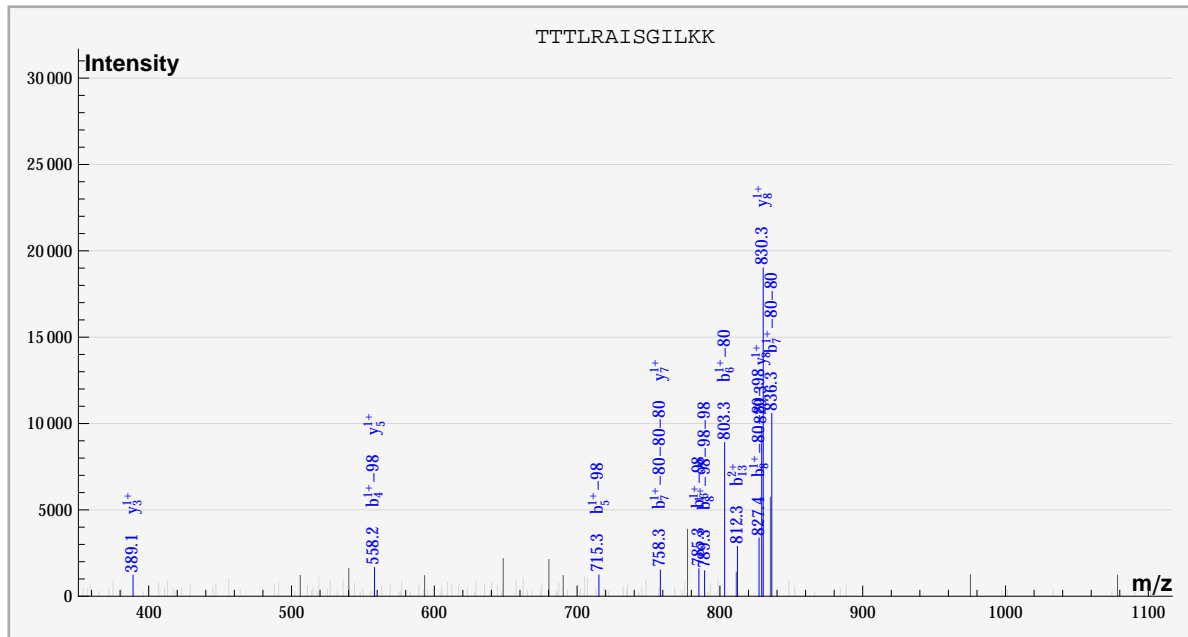

|   | #  | b | b* | #  | y | y* | P | P* |
|---|----|---|----|----|---|----|---|----|
| T | 1  |   |    |    |   |    |   |    |
| T | 2  |   |    | 12 |   |    |   |    |
| T | 3  |   |    | 11 |   |    |   |    |
| L | 4  |   | ✓  | 10 |   |    |   |    |
| R | 5  |   | ✓  | 9  |   |    |   |    |
| A | 6  |   | ✓  | 8  |   | ✓  |   |    |
| I | 7  |   | ✓  | 7  |   | ✓  |   |    |
| S | 8  |   | ✓  | 6  |   |    |   |    |
| G | 9  |   |    | 5  |   | ✓  |   |    |
| I | 10 |   |    | 4  |   |    |   |    |
| L | 11 |   |    | 3  |   | ✓  |   |    |
| K | 12 |   |    | 2  |   |    |   |    |
| K | 13 | ✓ |    | 1  |   |    |   |    |

T T T L R A I S G I L K K

dbValid true VLNSTK PHOS(2) 1. 823. -1.67948 5.05499 100. ? 4218.  
 S\_Acido\_new%gi|68568511|gb|AAY81440.1| VLNSTK%:::PHOS:PHOS::%sample\_1%cmpd\_2706

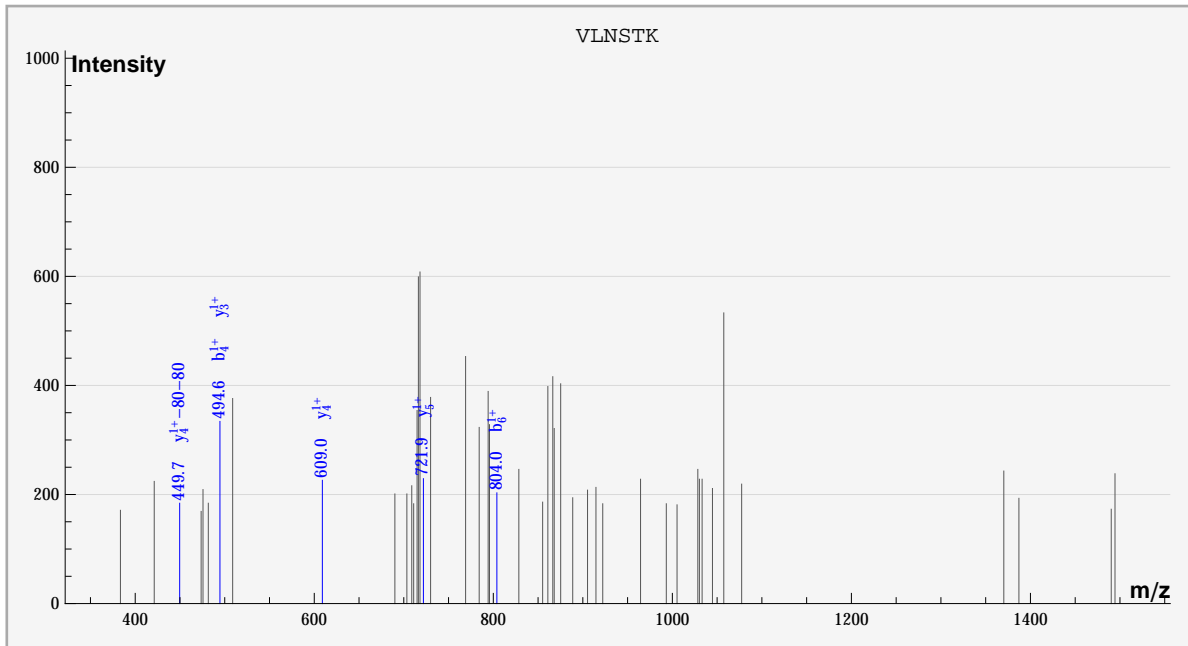

|   | # | b | b* | # | y | y* | P | P* |
|---|---|---|----|---|---|----|---|----|
| V | 1 |   |    |   |   |    |   |    |
| L | 2 |   |    | 5 | ✓ |    |   |    |
| N | 3 |   |    | 4 | ✓ | ✓  |   |    |
| S | 4 | ✓ |    | 3 | ✓ |    |   |    |
| T | 5 |   |    | 2 |   |    |   |    |
| K | 6 | ✓ |    | 1 |   |    |   |    |

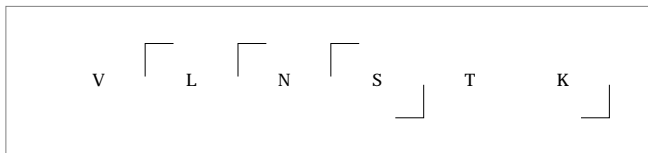

dbValid true LTQDELEQLSRR PHOS(2) 2. 823. 1.36056 5.29275 100. ? 5214.

S\_Acido\_new%gi|68566647|gb|AA79576.1| LTQDELEQLSRR::PHOS:::PHOS:::sample\_1%compd\_3606

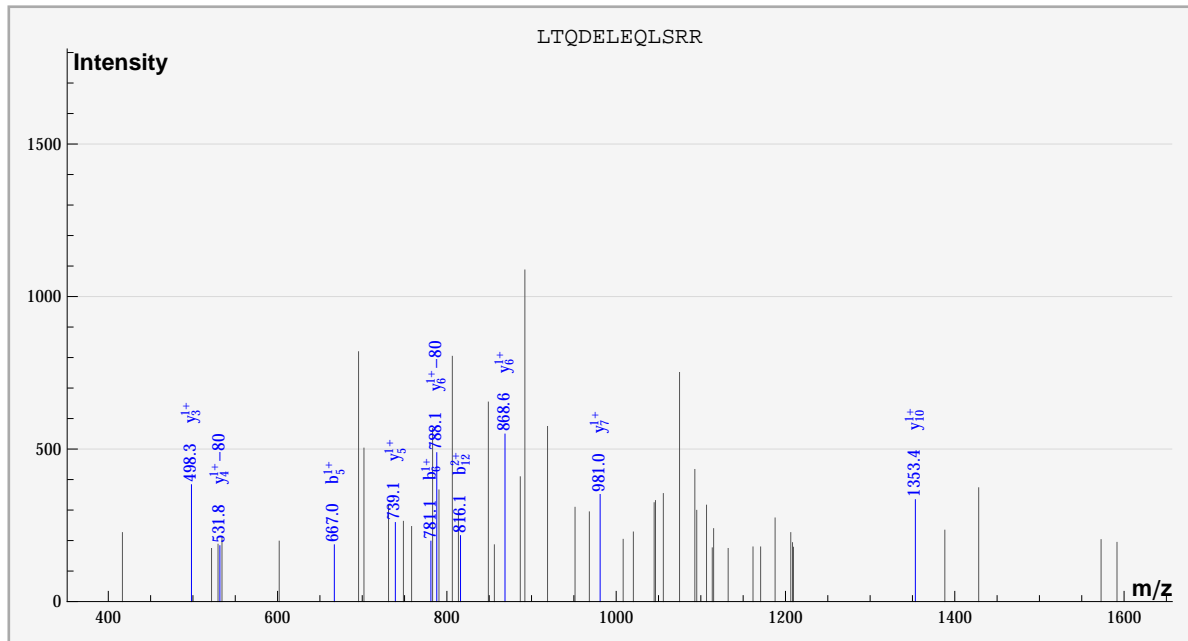

|   | #  | b | b* | #  | y | y* | P | P* |
|---|----|---|----|----|---|----|---|----|
| L | 1  |   |    |    |   |    |   |    |
| T | 2  |   |    | 11 |   |    |   |    |
| Q | 3  |   |    | 10 | ✓ |    |   |    |
| D | 4  |   |    | 9  |   |    |   |    |
| E | 5  | ✓ |    | 8  |   |    |   |    |
| L | 6  | ✓ |    | 7  | ✓ |    |   |    |
| E | 7  |   |    | 6  | ✓ | ✓  |   |    |
| Q | 8  |   |    | 5  | ✓ |    |   |    |
| L | 9  |   |    | 4  |   | ✓  |   |    |
| S | 10 |   |    | 3  | ✓ |    |   |    |
| R | 11 |   |    | 2  |   |    |   |    |
| R | 12 | ✓ |    | 1  |   |    |   |    |

L T Q D E L E Q L S R R



dbValid true AYNGYR PHOS(1) 1. 824. -0.686575 5.11802 100. ? 4578.  
 S\_Acido\_new%gi|68568272|gb|AAY81201.1| AYNGYR%:::PHOS::%sample\_1%compd\_3040

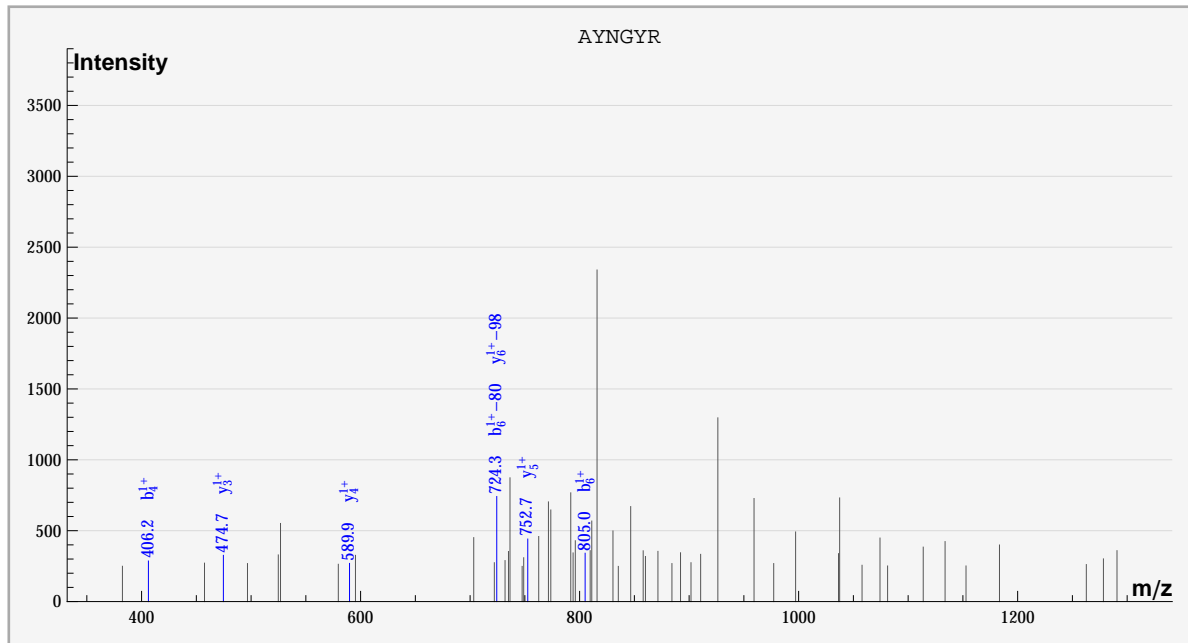

|   | # | b | b* | # | y | y* | P | P* |
|---|---|---|----|---|---|----|---|----|
| A | 1 |   |    |   |   |    |   | ✓  |
| Y | 2 |   |    | 5 | ✓ |    |   |    |
| N | 3 |   |    | 4 | ✓ |    |   |    |
| G | 4 | ✓ |    | 3 | ✓ |    |   |    |
| Y | 5 |   |    | 2 |   |    |   |    |
| R | 6 | ✓ | ✓  | 1 |   |    |   |    |

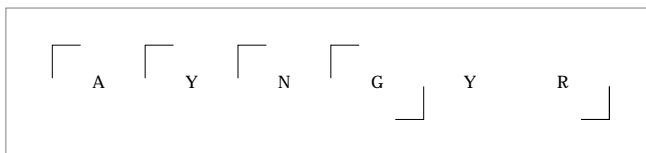

dbValid true TTSNNQ PHOS(2) 1. 825. -0.777715 5.21519 100. ? 1668.  
 S\_Acido\_new%gi|68567234|gb|AA80163.1| TTSNNQ%::PHOS:PHOS::::%sample\_1%compd\_383

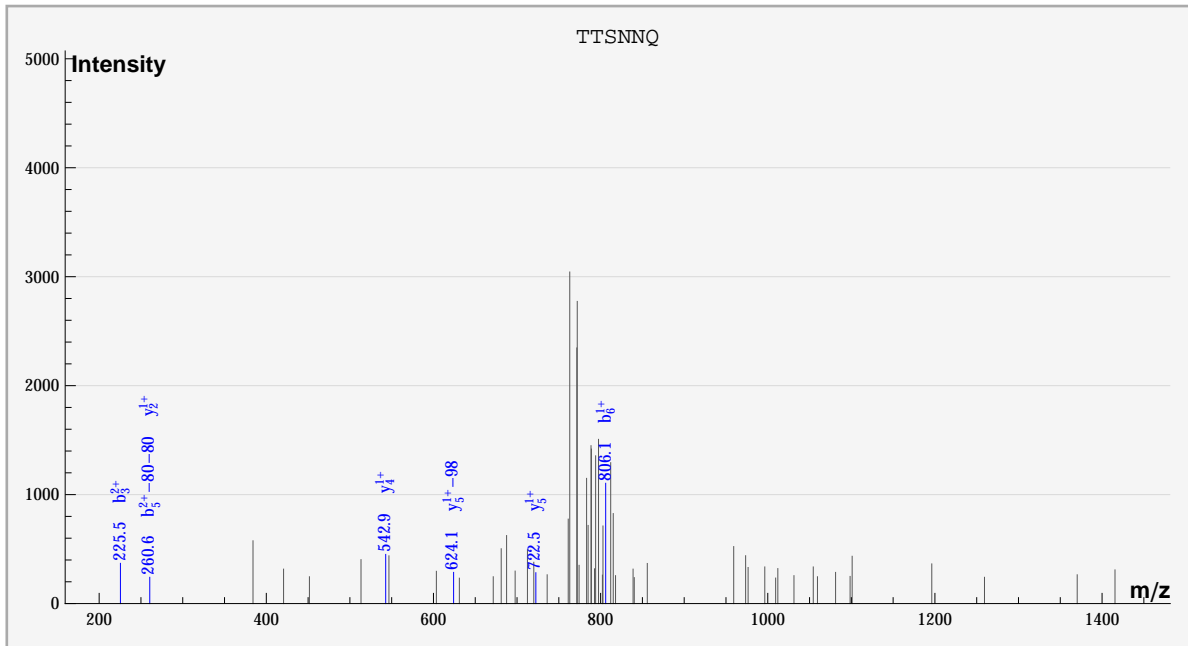

|   | # | b | b* | # | y | y* | P | P* |
|---|---|---|----|---|---|----|---|----|
| T | 1 |   |    |   |   |    |   |    |
| T | 2 |   |    | 5 | ✓ | ✓  |   |    |
| S | 3 | ✓ |    | 4 | ✓ |    |   |    |
| N | 4 |   |    | 3 |   |    |   |    |
| N | 5 |   | ✓  | 2 | ✓ |    |   |    |
| Q | 6 | ✓ |    | 1 |   |    |   |    |

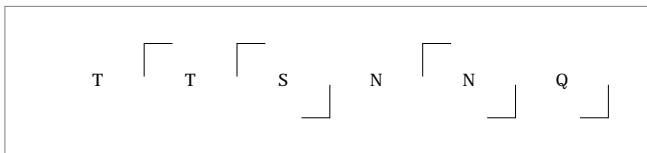



dbValid true STINSEALENKRK PHOS(2) 2. 825. 0.368387 5.62297 100. ? 2280.

S\_Acido\_new%gi|68567745|gb|AA80674.1| STINSEALENKRK%:PHOS:PHOS:.....%sample\_2%cmpd\_965

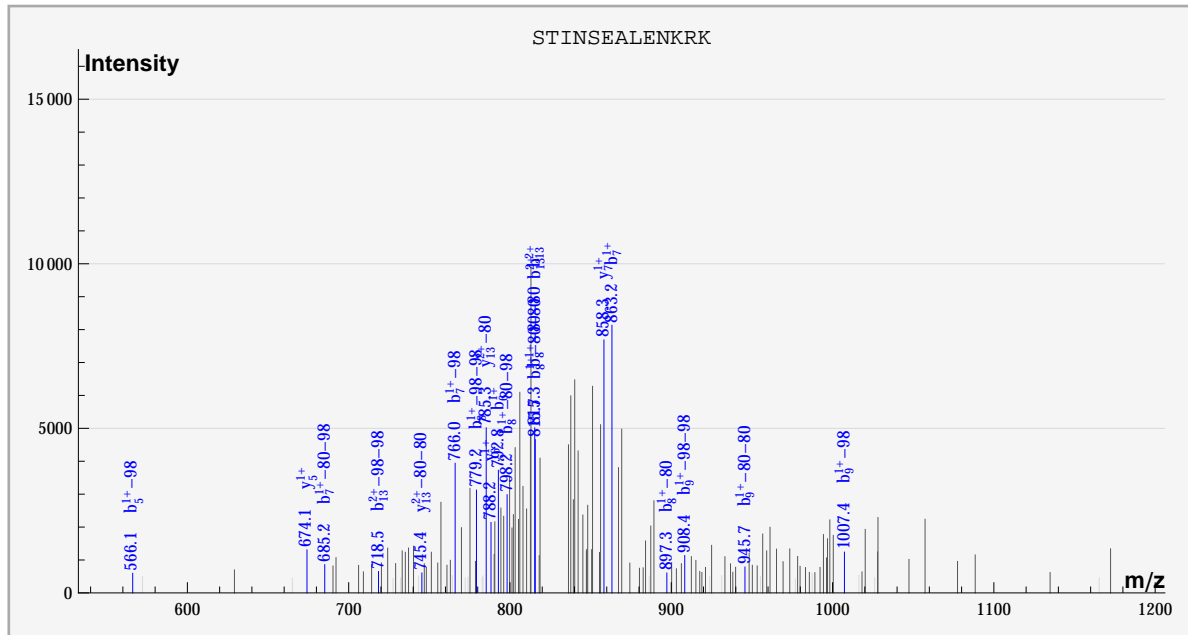

|   | #  | b | b* | #  | y | y* | P | P* |
|---|----|---|----|----|---|----|---|----|
| S | 1  |   |    |    |   |    |   | ✓  |
| T | 2  |   |    | 12 |   |    |   |    |
| I | 3  |   |    | 11 |   |    |   |    |
| N | 4  |   |    | 10 |   |    |   |    |
| S | 5  |   | ✓  | 9  |   |    |   |    |
| E | 6  | ✓ |    | 8  |   |    |   |    |
| A | 7  | ✓ | ✓  | 7  | ✓ |    |   |    |
| L | 8  |   | ✓  | 6  | ✓ |    |   |    |
| E | 9  |   | ✓  | 5  | ✓ |    |   |    |
| N | 10 |   |    | 4  |   |    |   |    |
| K | 11 |   |    | 3  |   |    |   |    |
| R | 12 |   |    | 2  |   |    |   |    |
| K | 13 | ✓ | ✓  | 1  |   |    |   |    |

「 S T I N S E A L E N K R K 」

dbValid true DFYTLSDGYKKR PHOS(2) 2. 825. 1.84147 5.19102 100. ? 2934.  
 S\_Acido\_new%gi|68567316|gb|AA80245.1| DFYTLSDGYKKR%:::PHOS:PHOS:::sample\_2%compd\_1549

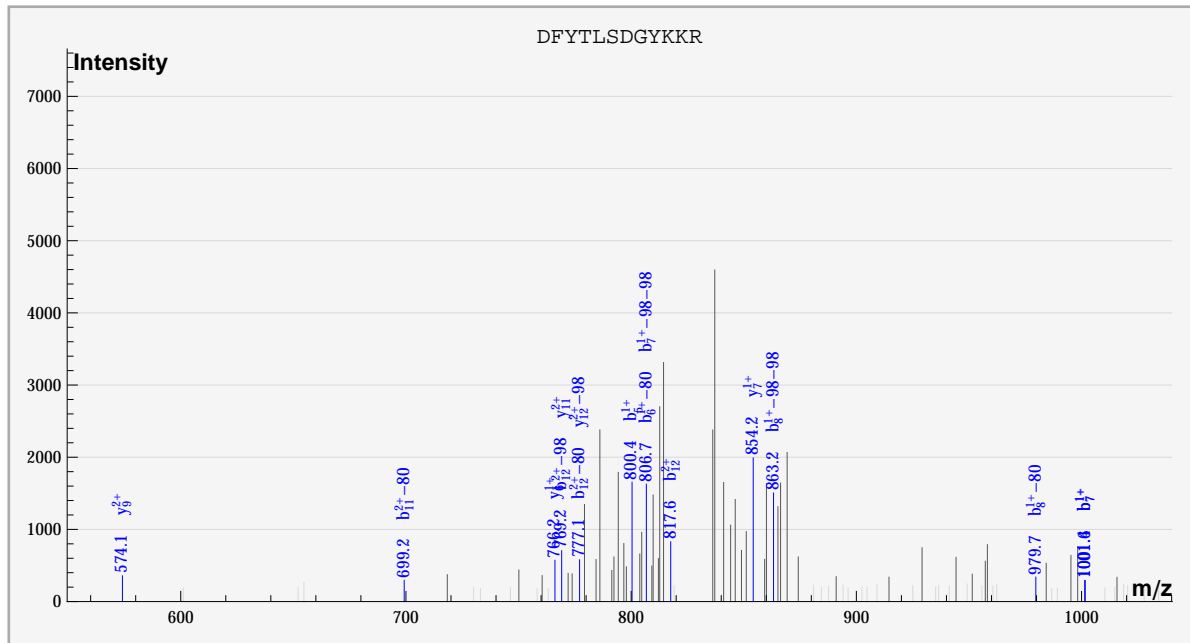

|   | #  | b | b* | #  | y | y* | P | P* |
|---|----|---|----|----|---|----|---|----|
| D | 1  |   |    |    |   |    |   | ✓  |
| F | 2  |   |    | 11 | ✓ |    |   |    |
| Y | 3  |   |    | 10 |   |    |   |    |
| T | 4  |   |    | 9  | ✓ |    |   |    |
| L | 5  | ✓ |    | 8  |   |    |   |    |
| S | 6  |   | ✓  | 7  | ✓ |    |   |    |
| D | 7  | ✓ | ✓  | 6  | ✓ |    |   |    |
| G | 8  |   | ✓  | 5  |   |    |   |    |
| Y | 9  |   |    | 4  |   |    |   |    |
| K | 10 |   |    | 3  |   |    |   |    |
| K | 11 |   | ✓  | 2  |   |    |   |    |
| R | 12 | ✓ | ✓  | 1  |   |    |   |    |

「 D 「 F Y 「 T L 「 S 「 D 「 G 「 Y K K 「 R 「

dbValid true DGSLSLR PHOS(1) 1. 829. -1.63416 5.11144 100. ? 1752.

S\_Acido\_new%gi|68566619|gb|AAY79548.1| DGSLSLR%:::PHOS:::%sample\_3%compd\_421

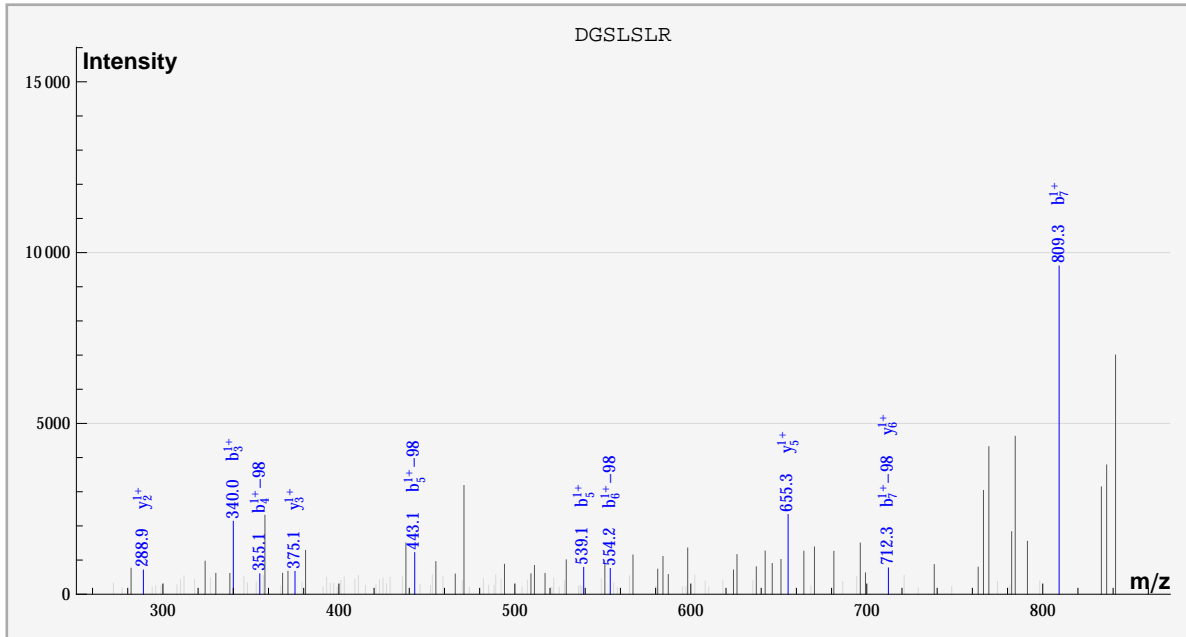

|   | # | b | b* | # | y | y* | P | P* |
|---|---|---|----|---|---|----|---|----|
| D | 1 |   |    |   |   |    |   |    |
| G | 2 |   |    | 6 | ✓ |    |   |    |
| S | 3 | ✓ |    | 5 | ✓ |    |   |    |
| L | 4 |   | ✓  | 4 |   |    |   |    |
| S | 5 | ✓ | ✓  | 3 | ✓ |    |   |    |
| L | 6 |   | ✓  | 2 | ✓ |    |   |    |
| R | 7 | ✓ | ✓  | 1 |   |    |   |    |

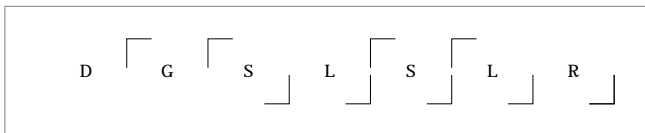

dbValid true DGSLSLR PHOS(1) 1. 829. -1.63416 5.05303 100. ? 1764.

S\_Acido\_new%gi|68566619|gb|AAY79548.1| DGSLSLR%:::PHOS:::%sample\_3%cmpd\_431

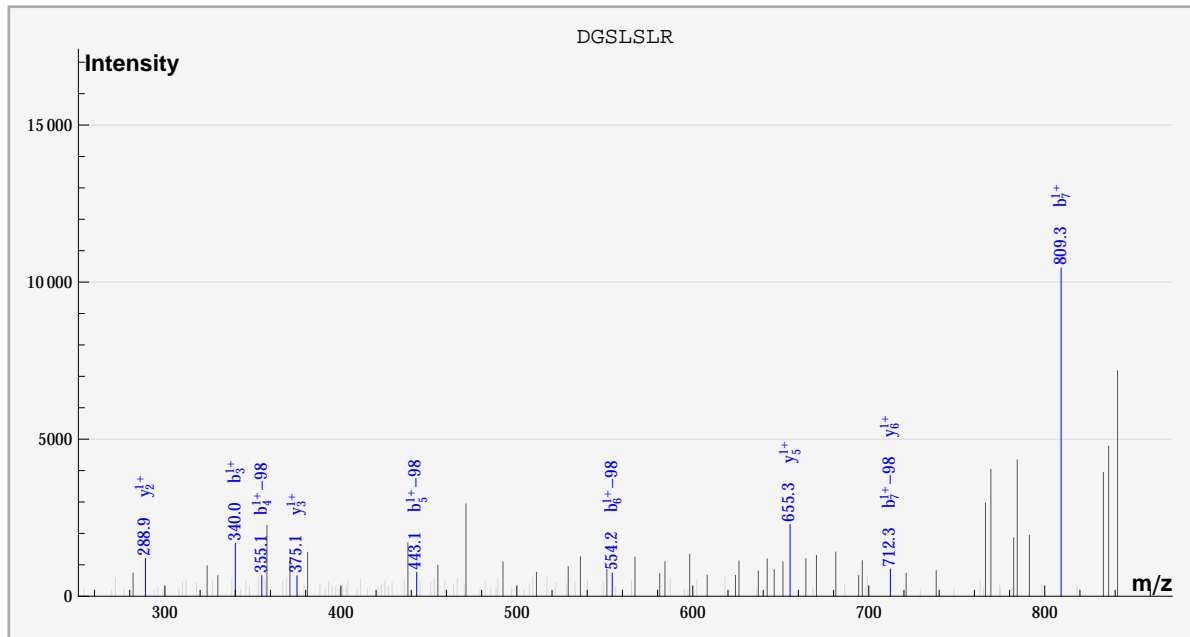

|   | # | b | b* | # | y | y* | P | P* |
|---|---|---|----|---|---|----|---|----|
| D | 1 |   |    |   |   |    |   |    |
| G | 2 |   |    | 6 | ✓ |    |   |    |
| S | 3 | ✓ |    | 5 | ✓ |    |   |    |
| L | 4 |   | ✓  | 4 |   |    |   |    |
| S | 5 |   | ✓  | 3 | ✓ |    |   |    |
| L | 6 |   | ✓  | 2 | ✓ |    |   |    |
| R | 7 | ✓ | ✓  | 1 |   |    |   |    |

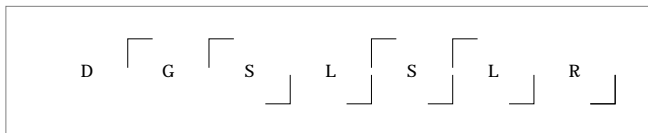

dbValid true DGSLSLR PHOS(1) 1. 829. -1.63416 5.0561 100. ? 1788.

S\_Acido\_new%gi|68566619|gb|AAY79548.1| DGSLSLR%:::PHOS:::%sample\_3%compd\_451

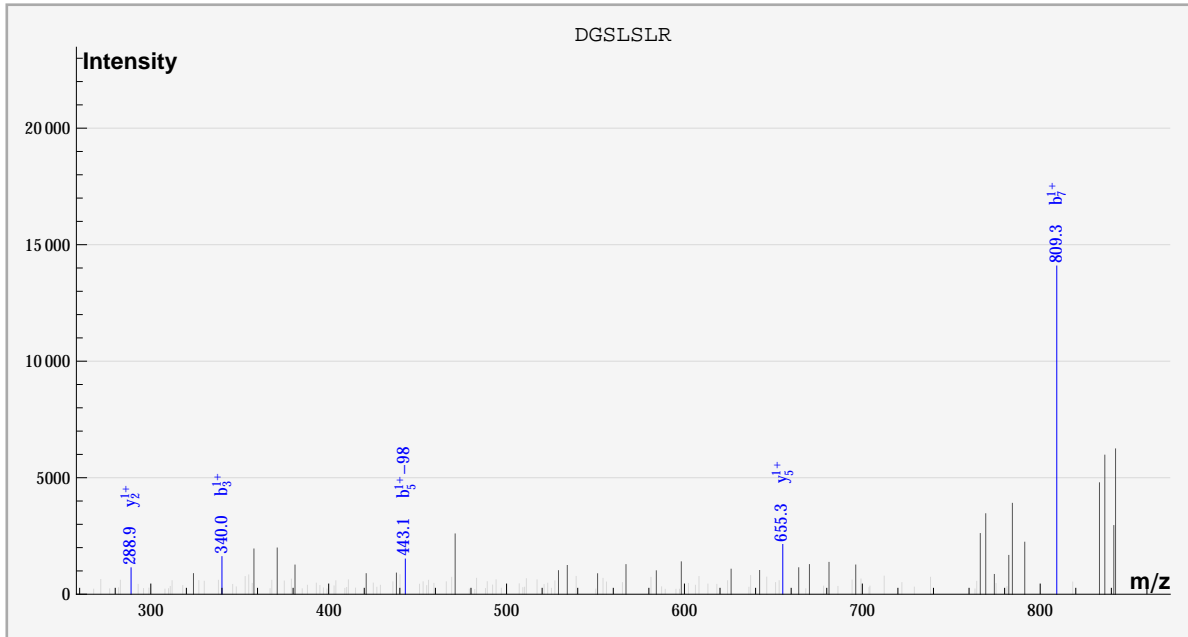

|   | # | b | b* | # | y | y* | P | P* |
|---|---|---|----|---|---|----|---|----|
| D | 1 |   |    |   |   |    |   |    |
| G | 2 |   |    | 6 |   |    |   |    |
| S | 3 | ✓ |    | 5 | ✓ |    |   |    |
| L | 4 |   |    | 4 |   |    |   |    |
| S | 5 |   | ✓  | 3 |   |    |   |    |
| L | 6 |   |    | 2 | ✓ |    |   |    |
| R | 7 | ✓ |    | 1 |   |    |   |    |

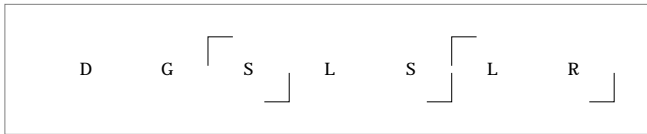

dbValid true RPYGVR PHOS(1) 1. 829. -1.60767 6.16011 100. ? 1818.  
 S\_Acido\_new%gi|68567864|gb|AAY80793.1| RPYGVR%:::PHOS:::%sample\_1%compd\_521

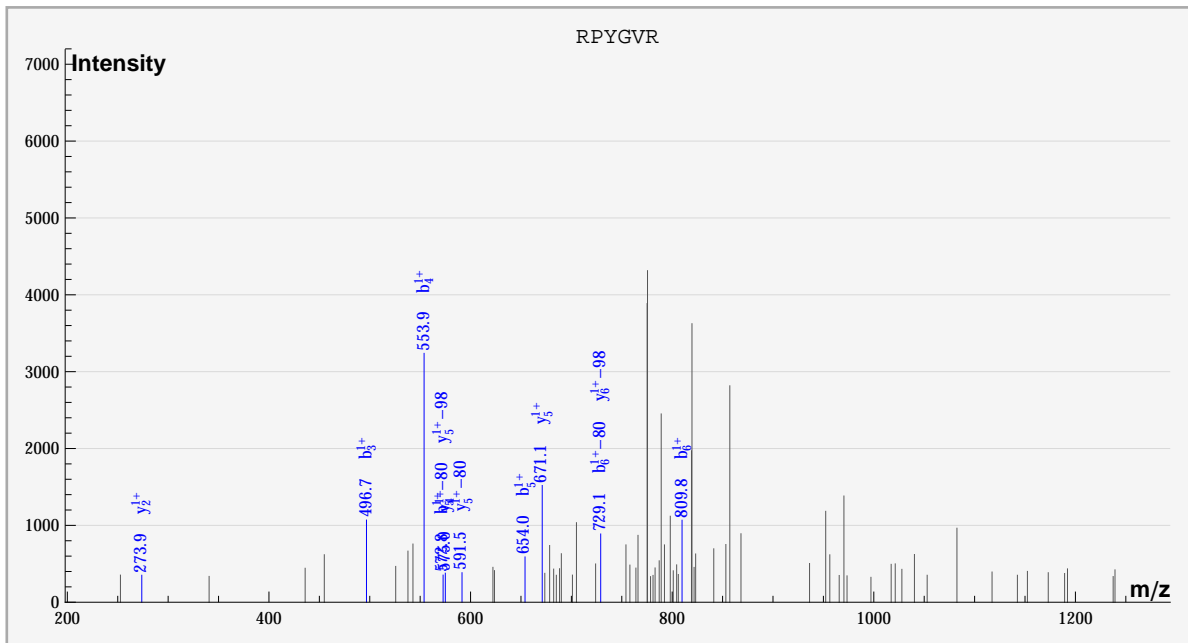

|   | # | b | b* | # | y | y* | P | P* |
|---|---|---|----|---|---|----|---|----|
| R | 1 |   |    |   |   |    |   | ✓  |
| P | 2 |   |    | 5 | ✓ | ✓  |   |    |
| Y | 3 | ✓ |    | 4 | ✓ |    |   |    |
| G | 4 | ✓ |    | 3 |   |    |   |    |
| V | 5 | ✓ | ✓  | 2 | ✓ |    |   |    |
| R | 6 | ✓ | ✓  | 1 |   |    |   |    |

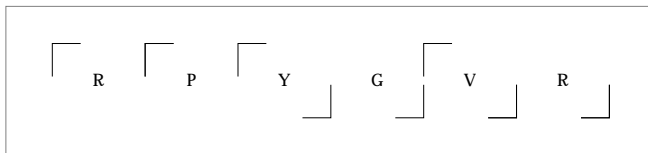

dbValid true AIVYQR PHOS(1) 1. 829. 0.396755 5.77964 100. ? 2862.  
 S\_Acido\_new%gi|68568697|gb|AAY81626.1| AIVYQR%:::PHOS:::sample\_1%compd\_1474

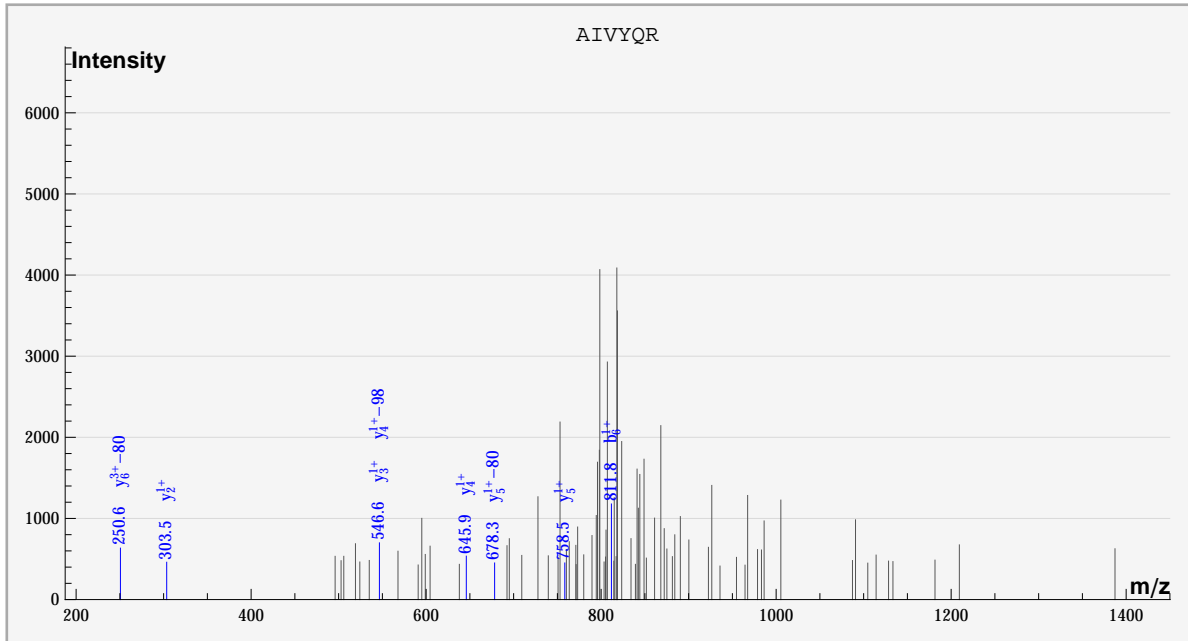

|   | # | b | b* | # | y | y* | P | P* |
|---|---|---|----|---|---|----|---|----|
| A | 1 |   |    |   |   |    |   | ✓  |
| I | 2 |   |    | 5 | ✓ | ✓  |   |    |
| V | 3 |   |    | 4 | ✓ | ✓  |   |    |
| Y | 4 |   |    | 3 | ✓ |    |   |    |
| Q | 5 |   |    | 2 | ✓ |    |   |    |
| R | 6 | ✓ |    | 1 |   |    |   |    |

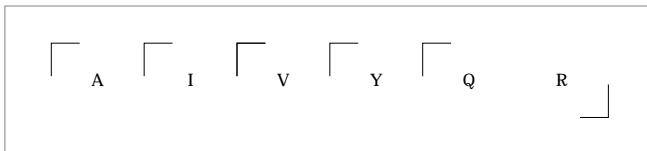

dbValid true YAKPGGQGYEELR PHOS(2) 2. 830. 1.34164 5.20845 100. ? 2928.

S\_Acido\_new%gi|68568492|gb|AAy81421.1| YAKPGGQGYEELR%:PHOS:.....PHOS:.....%sample\_3%compd\_1374

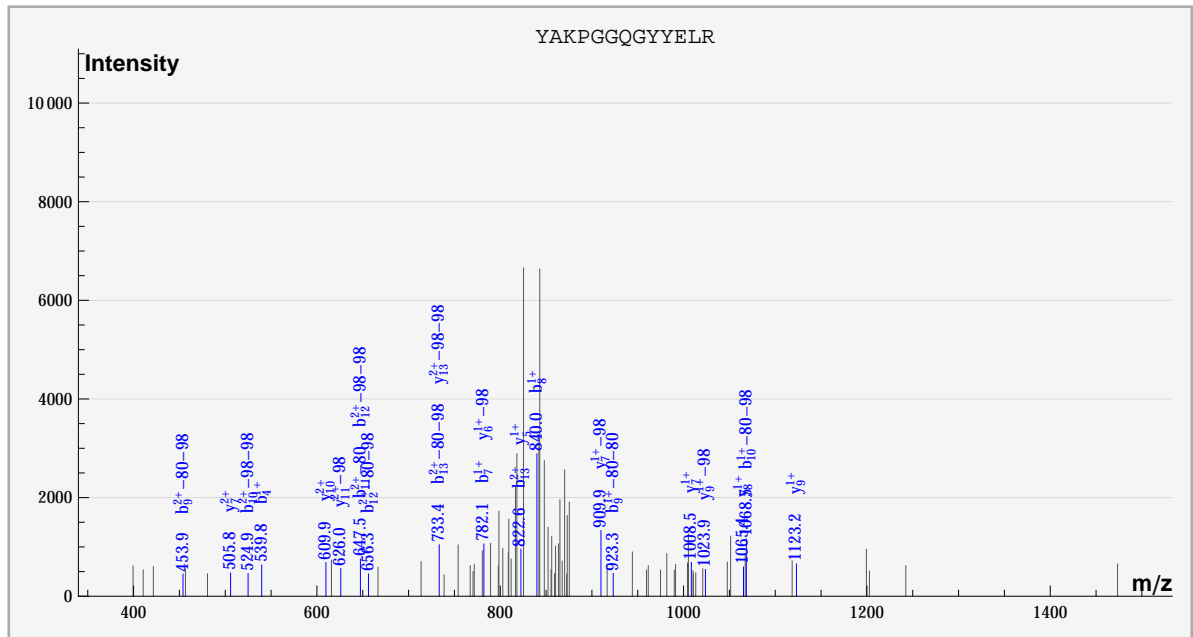

|   | #  | b | b* | #  | y | y* | P | P* |
|---|----|---|----|----|---|----|---|----|
| Y | 1  |   |    |    |   |    |   | ✓  |
| A | 2  |   |    | 12 |   |    |   |    |
| K | 3  |   |    | 11 |   | ✓  |   |    |
| P | 4  | ✓ |    | 10 | ✓ | ✓  |   |    |
| G | 5  |   |    | 9  | ✓ | ✓  |   |    |
| G | 6  |   |    | 8  | ✓ | ✓  |   |    |
| Q | 7  | ✓ |    | 7  | ✓ | ✓  |   |    |
| G | 8  | ✓ |    | 6  |   | ✓  |   |    |
| Y | 9  |   | ✓  | 5  | ✓ |    |   |    |
| Y | 10 |   | ✓  | 4  |   |    |   |    |
| E | 11 |   | ✓  | 3  |   |    |   |    |
| L | 12 |   | ✓  | 2  |   |    |   |    |
| R | 13 | ✓ | ✓  | 1  |   |    |   |    |

[ Y A K P ] G G Q G Y Y E L R ]



dbValid true TILLALGIGRITPSR PHOS(1) 2. 831. -0.0209027 5.76937 100. ? 2382.  
 S\_Acido\_new%gi|68568508|gb|AAY81437.1| TILLALGIGRITPSR%.....:PHOS::%sample\_0%compd\_951

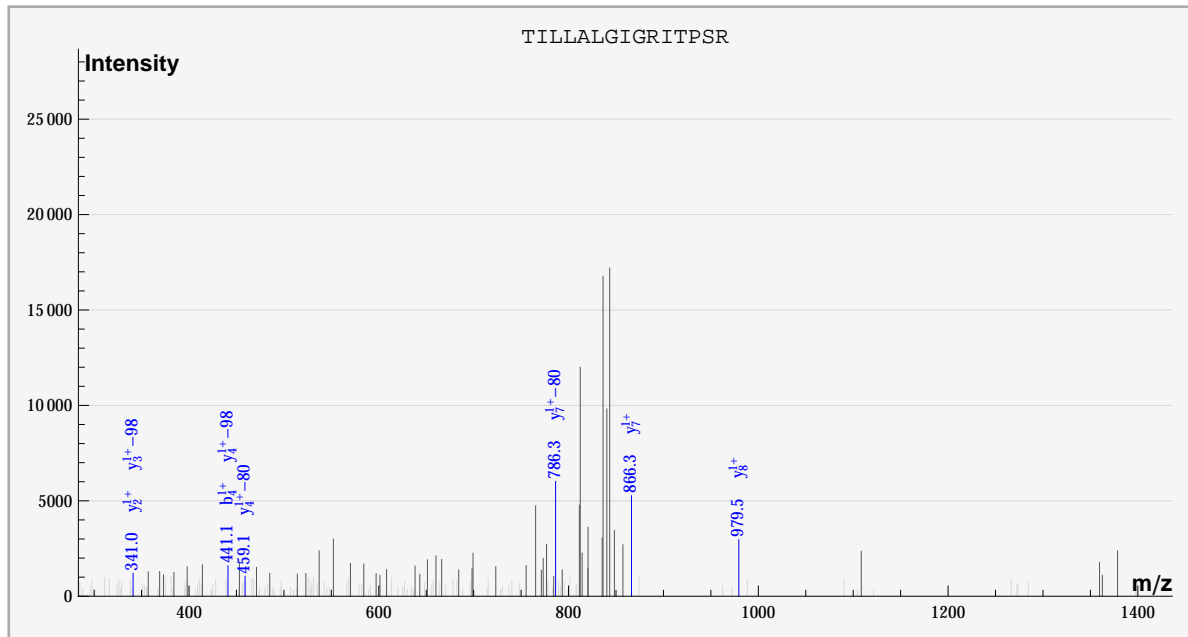

|   | #  | b | b* | #  | y | y* | P | P* |
|---|----|---|----|----|---|----|---|----|
| T | 1  |   |    |    |   |    |   |    |
| I | 2  |   |    | 14 |   |    |   |    |
| L | 3  |   |    | 13 |   |    |   |    |
| L | 4  | ✓ |    | 12 |   |    |   |    |
| A | 5  |   |    | 11 |   |    |   |    |
| L | 6  |   |    | 10 |   |    |   |    |
| G | 7  |   |    | 9  |   |    |   |    |
| I | 8  |   |    | 8  | ✓ |    |   |    |
| G | 9  |   |    | 7  | ✓ | ✓  |   |    |
| R | 10 |   |    | 6  |   |    |   |    |
| I | 11 |   |    | 5  |   |    |   |    |
| T | 12 |   |    | 4  |   | ✓  |   |    |
| P | 13 |   |    | 3  |   | ✓  |   |    |
| S | 14 |   |    | 2  | ✓ |    |   |    |
| R | 15 |   |    | 1  |   |    |   |    |

T I L L A L G I G R I T P S R

dbValid true MMYETIKLETK Oxidation\_M(2),PHOS(3) 2. 831.  
 -1.20164 5.1884 100. ? 2742. S\_Acido\_new%gi|68568643|gb|AAY81572.1|  
 MMYETIKLETK%:Oxidation\_M:Oxidation\_M:PHOS::PHOS:::PHOS::%sample\_0%compd\_1261

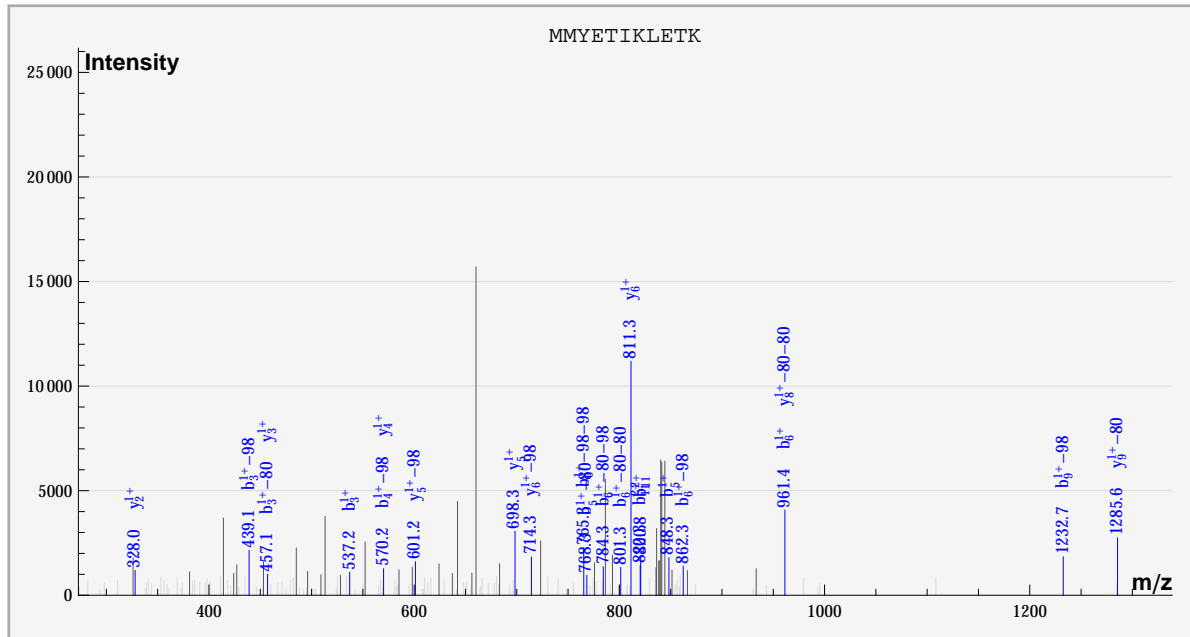

|   | #  | b | b* | #  | y | y* | P | P* |
|---|----|---|----|----|---|----|---|----|
| M | 1  |   |    |    |   |    |   |    |
| M | 2  |   |    | 10 |   |    |   |    |
| Y | 3  | ✓ | ✓  | 9  |   | ✓  |   |    |
| E | 4  |   | ✓  | 8  |   | ✓  |   |    |
| T | 5  | ✓ | ✓  | 7  |   |    |   |    |
| I | 6  | ✓ | ✓  | 6  | ✓ | ✓  |   |    |
| K | 7  |   |    | 5  | ✓ | ✓  |   |    |
| L | 8  |   |    | 4  | ✓ |    |   |    |
| E | 9  |   | ✓  | 3  | ✓ |    |   |    |
| T | 10 |   |    | 2  | ✓ |    |   |    |
| K | 11 | ✓ |    | 1  |   |    |   |    |

M M Y E T I K L E T K

dbValid true MMYETIKLETK Oxidation\_M(2),PHOS(3) 2. 831.  
 -1.20164 5.20363 100. ? 2754. S\_Acido\_new%g|68568643|g|AAY81572.1|  
 MMYETIKLETK%:Oxidation\_M:Oxidation\_M:PHOS::PHOS:::PHOS::%sample\_0%cmpd\_1271

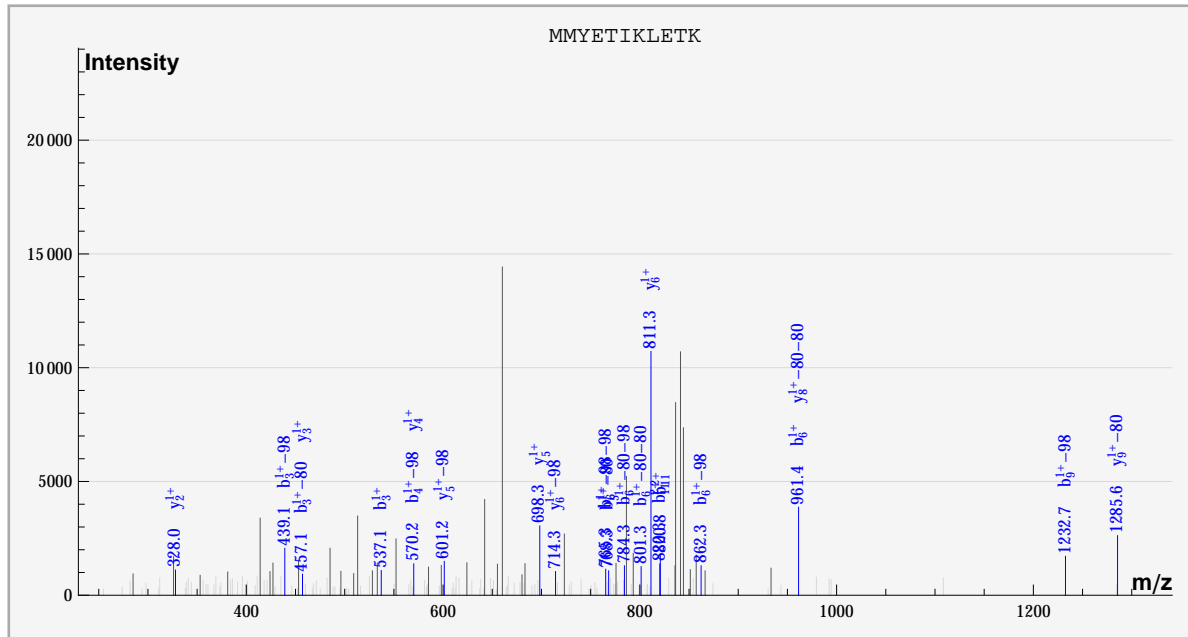

|   | #  | b | b* | #  | y | y* | P | P* |
|---|----|---|----|----|---|----|---|----|
| M | 1  |   |    |    |   |    |   |    |
| M | 2  |   |    | 10 |   |    |   |    |
| Y | 3  | ✓ | ✓  | 9  |   | ✓  |   |    |
| E | 4  |   | ✓  | 8  |   | ✓  |   |    |
| T | 5  |   | ✓  | 7  |   |    |   |    |
| I | 6  | ✓ | ✓  | 6  | ✓ | ✓  |   |    |
| K | 7  |   |    | 5  | ✓ | ✓  |   |    |
| L | 8  |   |    | 4  | ✓ |    |   |    |
| E | 9  |   | ✓  | 3  | ✓ |    |   |    |
| T | 10 |   |    | 2  | ✓ |    |   |    |
| K | 11 | ✓ |    | 1  |   |    |   |    |

M M Y E T I K L E T K

dbValid true MMYETIKLETK Oxidation\_M(2),PHOS(3) 2. 831.  
 -1.20164 5.11544 100. ? 2766. S\_Acido\_new%g|68568643|gb|AAY81572.1|  
 MMYETIKLETK%:Oxidation\_M:Oxidation\_M:PHOS::PHOS:::PHOS::%sample\_0%cmpd\_1282

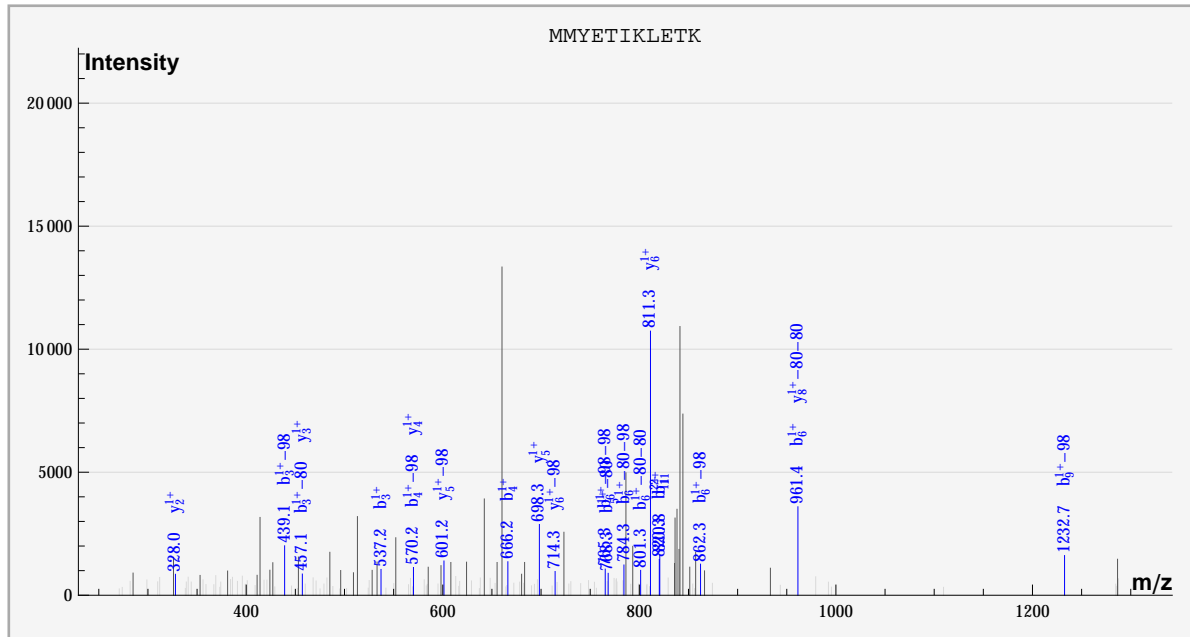

|   | #  | b | b* | #  | y | y* | P | P* |
|---|----|---|----|----|---|----|---|----|
| M | 1  |   |    |    |   |    |   |    |
| M | 2  |   |    | 10 |   |    |   |    |
| Y | 3  | ✓ | ✓  | 9  |   |    |   |    |
| E | 4  | ✓ | ✓  | 8  |   | ✓  |   |    |
| T | 5  |   | ✓  | 7  |   |    |   |    |
| I | 6  | ✓ | ✓  | 6  | ✓ | ✓  |   |    |
| K | 7  |   |    | 5  | ✓ | ✓  |   |    |
| L | 8  |   |    | 4  | ✓ |    |   |    |
| E | 9  |   | ✓  | 3  | ✓ |    |   |    |
| T | 10 |   |    | 2  | ✓ |    |   |    |
| K | 11 | ✓ |    | 1  |   |    |   |    |

M M Y E T I K L E T K

dbValid true MMYETIKLETK Oxidation\_M(2),PHOS(3) 2. 831.  
 -1.20164 5.17926 100. ? 2814. S\_Acido\_new%g|68568643|gb|AAY81572.1|  
 MMYETIKLETK%:Oxidation\_M:Oxidation\_M:PHOS::PHOS:::PHOS::%sample\_0%cmpd\_1324

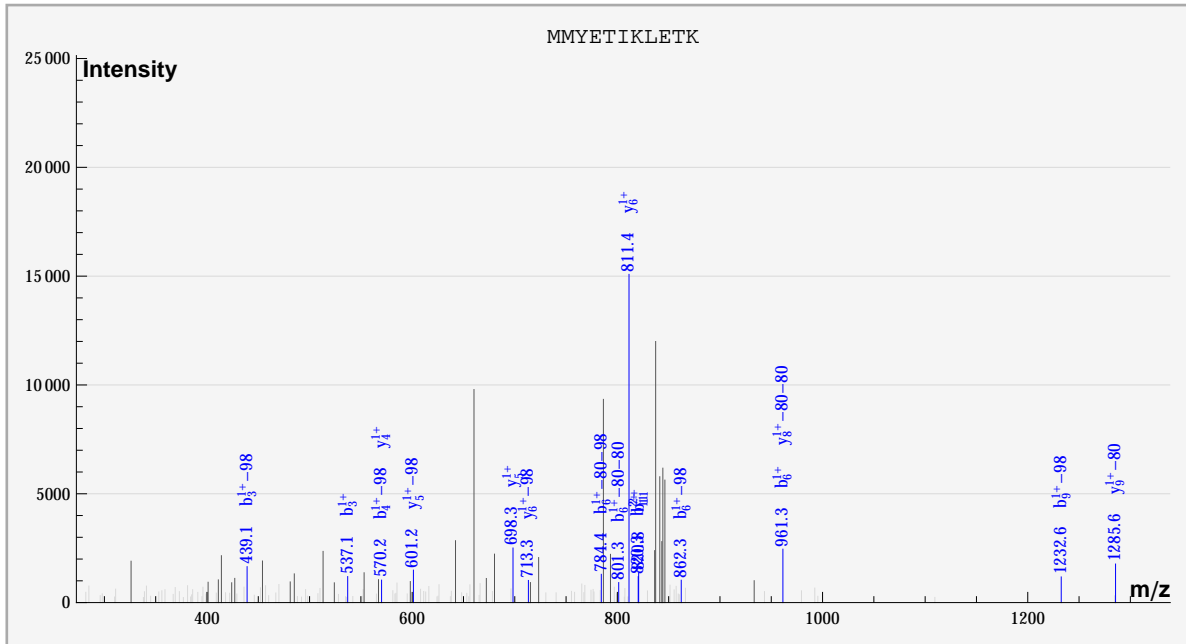

|   | #  | b | b* | #  | y | y* | P | P* |
|---|----|---|----|----|---|----|---|----|
| M | 1  |   |    |    |   |    |   |    |
| M | 2  |   |    | 10 |   |    |   |    |
| Y | 3  | ✓ | ✓  | 9  |   | ✓  |   |    |
| E | 4  |   | ✓  | 8  |   | ✓  |   |    |
| T | 5  |   |    | 7  |   |    |   |    |
| I | 6  | ✓ | ✓  | 6  | ✓ | ✓  |   |    |
| K | 7  |   |    | 5  | ✓ | ✓  |   |    |
| L | 8  |   |    | 4  | ✓ |    |   |    |
| E | 9  |   | ✓  | 3  |   |    |   |    |
| T | 10 |   |    | 2  |   |    |   |    |
| K | 11 | ✓ |    | 1  |   |    |   |    |

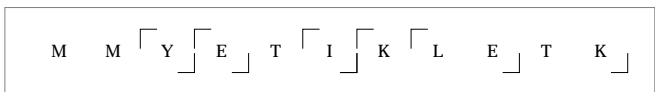

dbValid true MMYETIKLETK Oxidation\_M(2),PHOS(3) 2. 831.  
 -1.20164 5.43097 100. ? 2916. S\_Acido\_new%g|68568643|gb|AAY81572.1|  
 MMYETIKLETK%:Oxidation\_M:Oxidation\_M:PHOS::PHOS:::PHOS::%sample\_0%compd\_1405

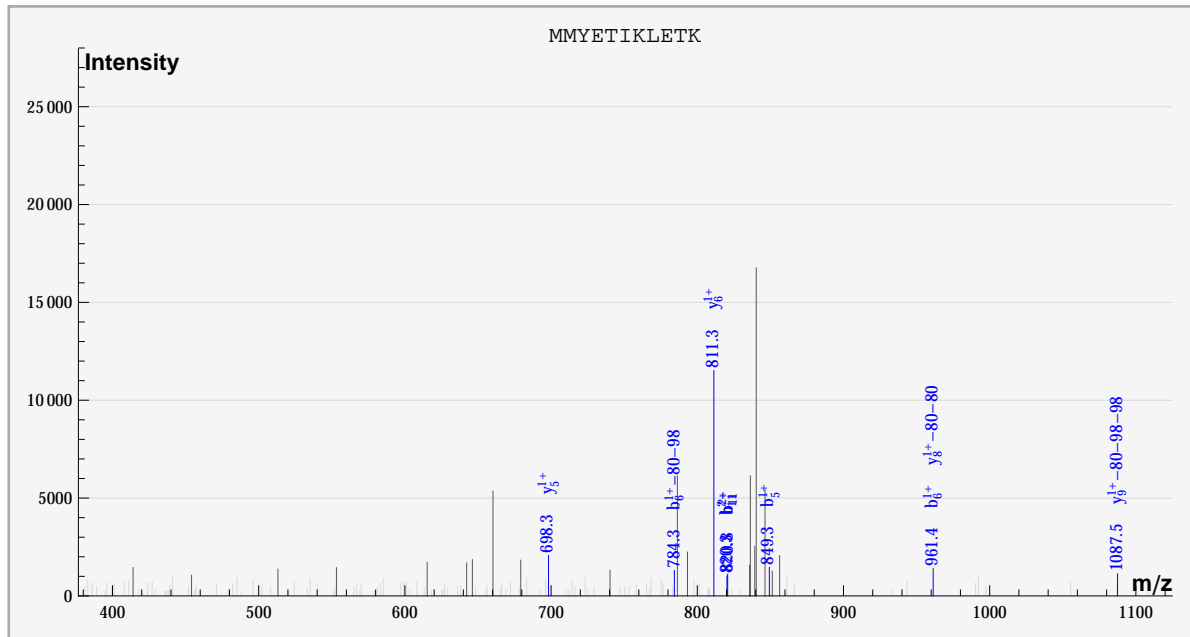

|   | #  | b | b* | #  | y | y* | P | P* |
|---|----|---|----|----|---|----|---|----|
| M | 1  |   |    |    |   |    |   |    |
| M | 2  |   |    | 10 |   |    |   |    |
| Y | 3  |   |    | 9  |   | ✓  |   |    |
| E | 4  |   |    | 8  |   | ✓  |   |    |
| T | 5  | ✓ |    | 7  |   |    |   |    |
| I | 6  | ✓ | ✓  | 6  | ✓ |    |   |    |
| K | 7  |   |    | 5  | ✓ |    |   |    |
| L | 8  |   |    | 4  |   |    |   |    |
| E | 9  |   |    | 3  |   |    |   |    |
| T | 10 |   |    | 2  |   |    |   |    |
| K | 11 | ✓ |    | 1  |   |    |   |    |

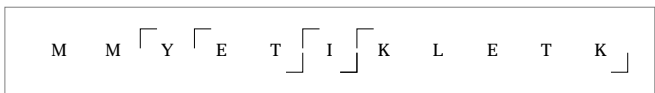

dbValid true MMYETIKLETK Oxidation\_M(2),PHOS(3) 2. 831.  
 -1.20164 5.27151 100. ? 2940. S\_Acido\_new%g|68568643|gb|AAY81572.1|  
 MMYETIKLETK%:Oxidation\_M:Oxidation\_M:PHOS::PHOS:::PHOS::%sample\_0%compd\_1427

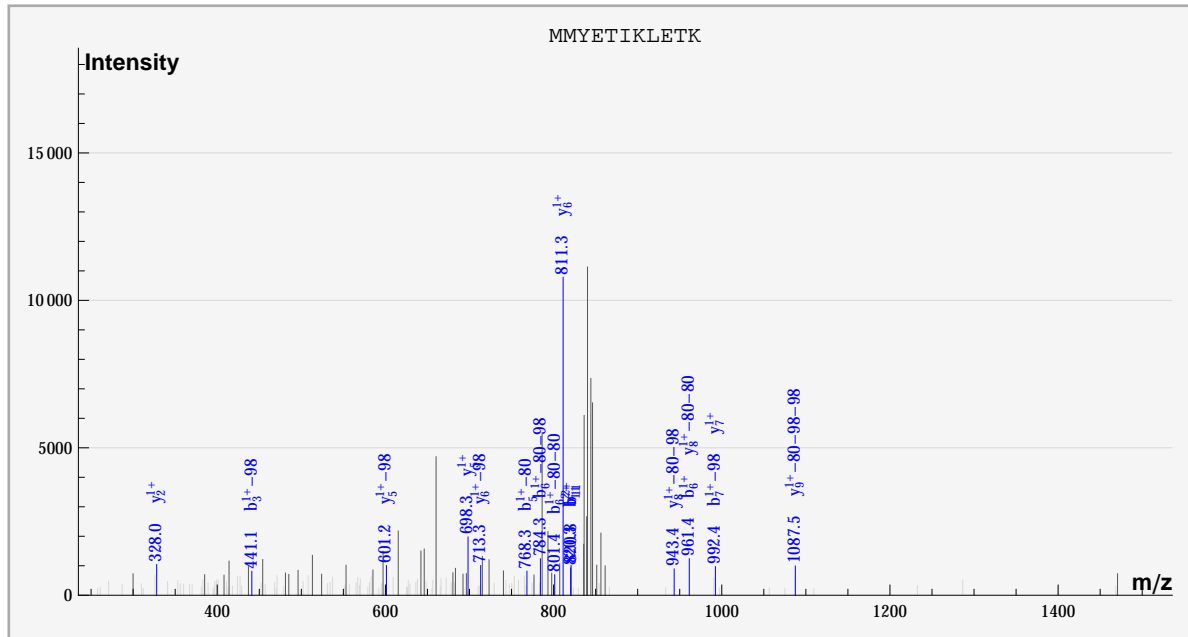

|   | #  | b | b* | #  | y | y* | P | P* |
|---|----|---|----|----|---|----|---|----|
| M | 1  |   |    |    |   |    |   |    |
| M | 2  |   |    | 10 |   |    |   |    |
| Y | 3  |   | ✓  | 9  |   | ✓  |   |    |
| E | 4  |   | ✓  | 8  |   | ✓  |   |    |
| T | 5  |   | ✓  | 7  |   | ✓  |   |    |
| I | 6  | ✓ | ✓  | 6  |   | ✓  | ✓ |    |
| K | 7  |   | ✓  | 5  |   | ✓  | ✓ |    |
| L | 8  |   |    | 4  |   |    |   |    |
| E | 9  |   |    | 3  |   |    |   |    |
| T | 10 |   |    | 2  |   | ✓  |   |    |
| K | 11 | ✓ |    | 1  |   |    |   |    |

M M Y E T I K L E T K

dbValid true MMYETIKLETK Oxidation\_M(2),PHOS(3) 2. 831.  
 -1.20164 5.23543 100. ? 2952. S\_Acido\_new%g|68568643|gb|AAY81572.1|  
 MMYETIKLETK%:Oxidation\_M:Oxidation\_M:PHOS::PHOS:::PHOS::%sample\_0%compd\_1437

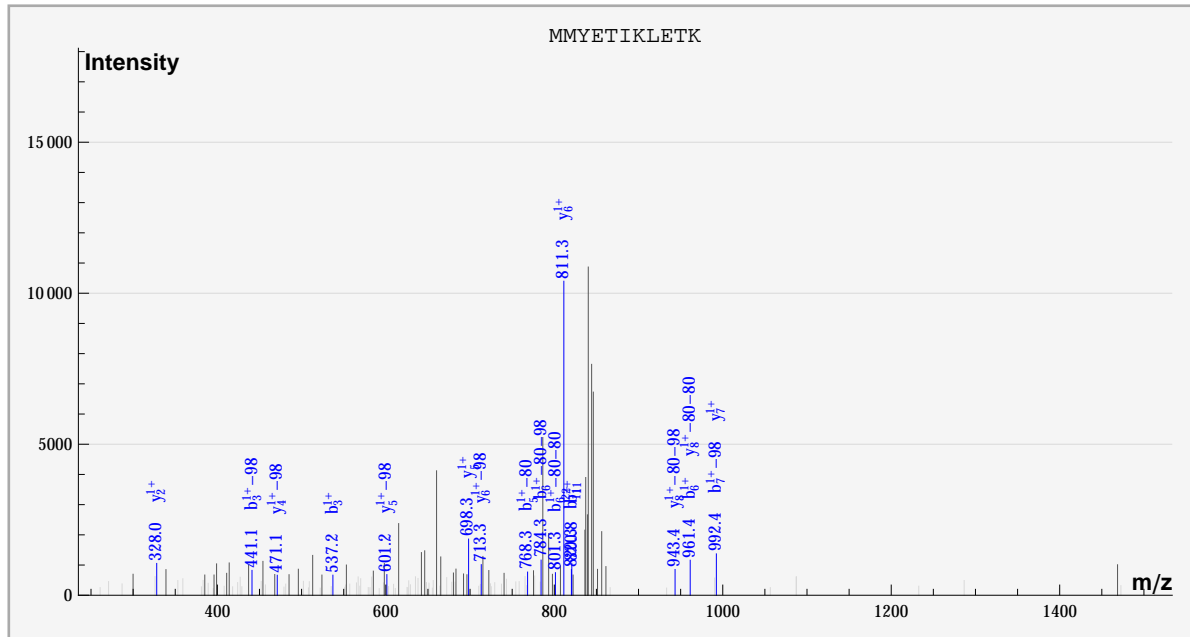

|   | #  | b | b* | #  | y | y* | P | P* |
|---|----|---|----|----|---|----|---|----|
| M | 1  |   |    |    |   |    |   |    |
| M | 2  |   |    | 10 |   |    |   |    |
| Y | 3  | ✓ | ✓  | 9  |   |    |   |    |
| E | 4  |   |    | 8  |   | ✓  |   |    |
| T | 5  |   | ✓  | 7  | ✓ |    |   |    |
| I | 6  | ✓ | ✓  | 6  | ✓ | ✓  |   |    |
| K | 7  |   | ✓  | 5  | ✓ | ✓  |   |    |
| L | 8  |   |    | 4  |   | ✓  |   |    |
| E | 9  |   |    | 3  |   |    |   |    |
| T | 10 |   |    | 2  | ✓ |    |   |    |
| K | 11 | ✓ |    | 1  |   |    |   |    |

M M Y E T I K L E T K



dbValid true GELSKSPALETLLK PHOS(2) 2. 831. -0.0984777 5.32626 100. ? 3060.  
 S\_Acido\_new%gi|68568108|gb|AAy81037.1| GELSKSPALETLLK%.....PHOS:::PHOS:::%sample\_0%cmpd\_1530

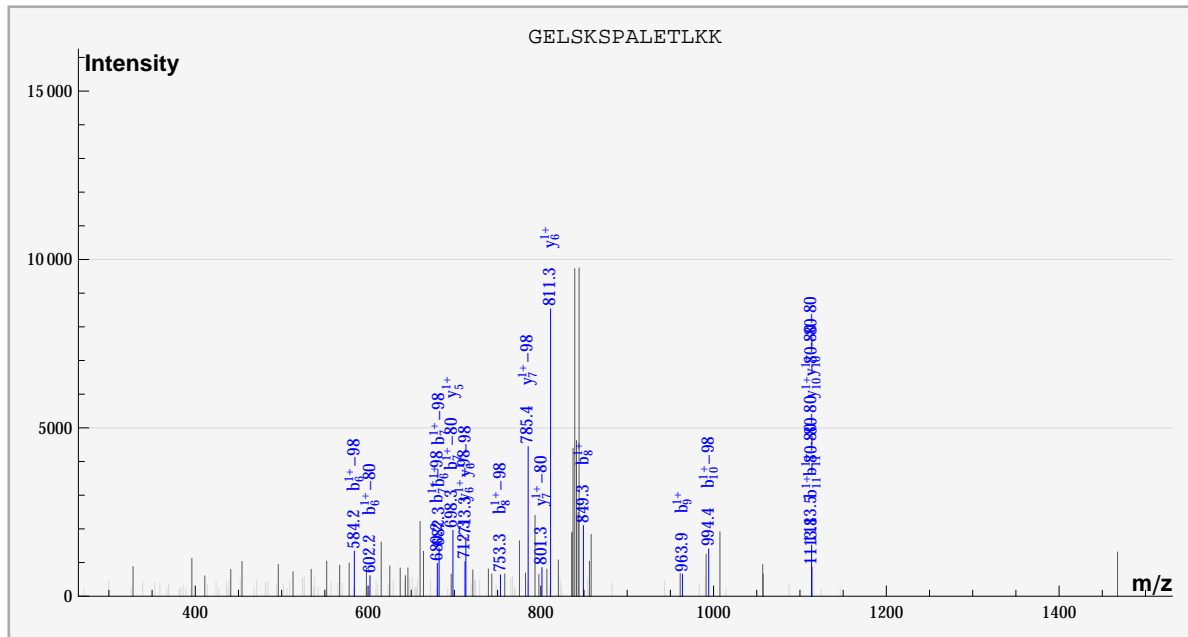

|   | #  | b | b* | #  | y | y* | P | P* |
|---|----|---|----|----|---|----|---|----|
| G | 1  |   |    |    |   |    |   |    |
| E | 2  |   |    | 13 |   |    |   |    |
| L | 3  |   |    | 12 |   |    |   |    |
| S | 4  |   |    | 11 |   |    |   |    |
| K | 5  |   |    | 10 |   | ✓  |   |    |
| S | 6  | ✓ | ✓  | 9  |   |    |   |    |
| P | 7  |   | ✓  | 8  |   |    |   |    |
| A | 8  | ✓ | ✓  | 7  |   | ✓  |   |    |
| L | 9  | ✓ |    | 6  | ✓ | ✓  |   |    |
| E | 10 |   | ✓  | 5  | ✓ |    |   |    |
| T | 11 |   | ✓  | 4  |   |    |   |    |
| L | 12 |   |    | 3  |   |    |   |    |
| K | 13 |   |    | 2  |   |    |   |    |
| K | 14 |   |    | 1  |   |    |   |    |

G E L S K S P A L E T L K K

dbValid true YTFSSFSNSVKR PHOS(3) 2. 833. -1.1963 5.3499 100. ? 3414.  
 S\_Acido\_new%gi|68567545|gb|AA80474.1| YTFSSFSNSVKR%:PHOS:::PHOS::PHOS:::sample\_0%compd\_1835

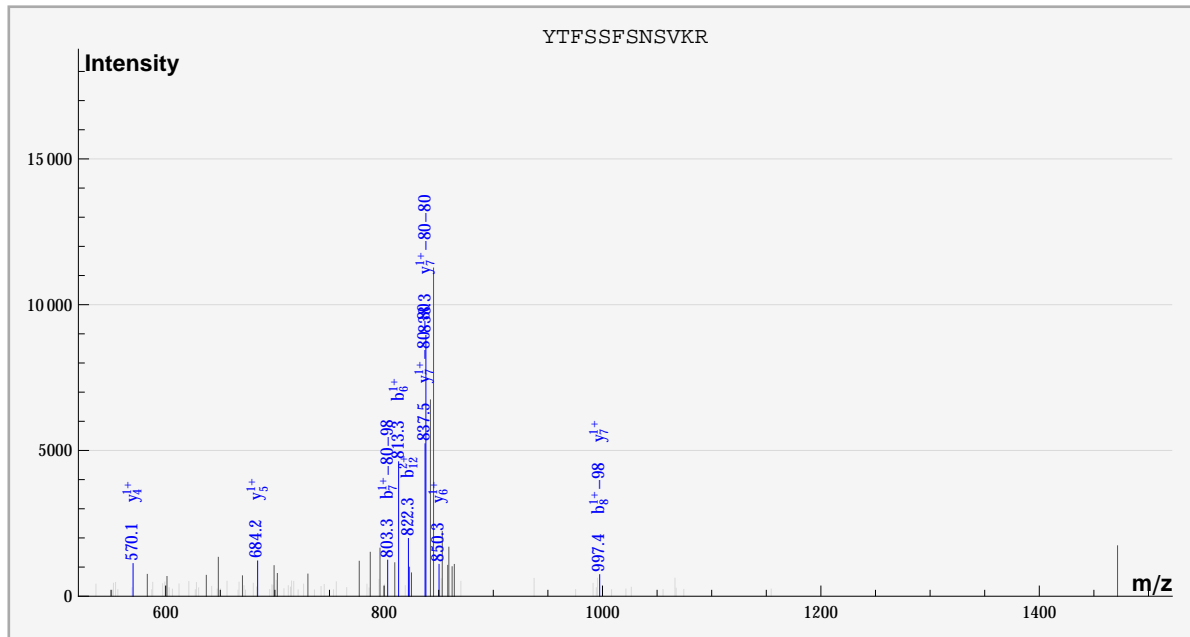

|   | #  | b | b* | #  | y | y* | P | P* |
|---|----|---|----|----|---|----|---|----|
| Y | 1  |   |    |    |   |    |   |    |
| T | 2  |   |    | 11 |   |    |   |    |
| F | 3  |   |    | 10 |   |    |   |    |
| S | 4  |   |    | 9  |   |    |   |    |
| S | 5  |   |    | 8  |   |    |   |    |
| F | 6  | ✓ |    | 7  | ✓ | ✓  |   |    |
| S | 7  |   | ✓  | 6  | ✓ |    |   |    |
| N | 8  |   | ✓  | 5  | ✓ |    |   |    |
| S | 9  |   |    | 4  | ✓ |    |   |    |
| V | 10 |   |    | 3  |   |    |   |    |
| K | 11 |   |    | 2  |   |    |   |    |
| R | 12 | ✓ |    | 1  |   |    |   |    |

Y T F S S [ F ] [ S ] [ N ] S V K R ]

dbValid true KYNEFIPNREER PHOS(1) 2. 836.98 0.905402 5.27172 100. ? 3042.  
 S\_Acido\_new%gil68566572|gb|AA79501.1| KYNEFIPNREER%::PHOS:::sample\_1%cmpd\_1777

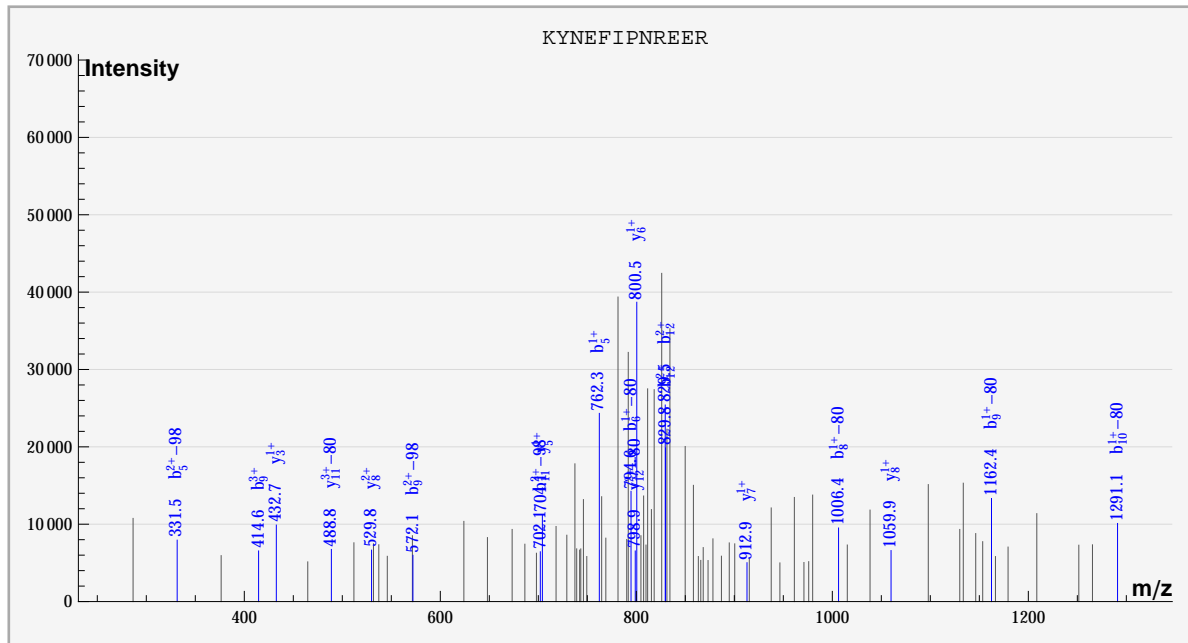

|   | #  | b | b* | #  | y | y* | P | P* |
|---|----|---|----|----|---|----|---|----|
| K | 1  |   |    |    |   |    |   | ✓  |
| Y | 2  |   |    | 11 |   | ✓  |   |    |
| N | 3  |   |    | 10 |   |    |   |    |
| E | 4  |   |    | 9  |   |    |   |    |
| F | 5  | ✓ | ✓  | 8  |   | ✓  |   |    |
| I | 6  |   | ✓  | 7  |   | ✓  |   |    |
| P | 7  |   |    | 6  |   | ✓  |   |    |
| N | 8  |   | ✓  | 5  |   | ✓  |   |    |
| R | 9  | ✓ | ✓  | 4  |   |    |   |    |
| E | 10 |   | ✓  | 3  |   | ✓  |   |    |
| E | 11 |   | ✓  | 2  |   |    |   |    |
| R | 12 | ✓ |    | 1  |   |    |   |    |

[ K ] [ Y ] N E [ F ] I [ P ] N ] R ] E ] E ] R ]

dbValid true YMREFGLFEYR PHOS(2) 2. 837. -1.17269 5.32625 100. ? 3456.

S\_Acido\_new%gi|68568187|gb|AAY81116.1| YMREFGLFEYR%:PHOS:::PHOS::%sample\_3%compd\_1814

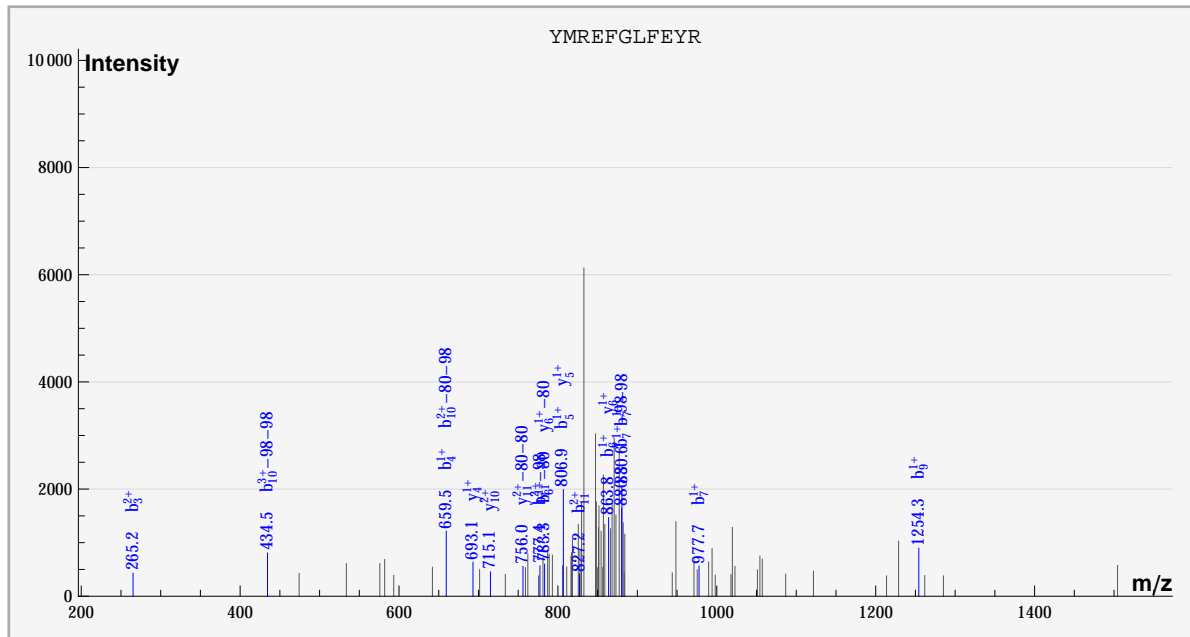

|   | #  | b | b* | #  | y | y* | P | P* |
|---|----|---|----|----|---|----|---|----|
| Y | 1  |   |    |    |   |    |   | ✓  |
| M | 2  |   |    | 10 | ✓ |    |   |    |
| R | 3  | ✓ |    | 9  |   |    |   |    |
| E | 4  | ✓ |    | 8  |   |    |   |    |
| F | 5  | ✓ |    | 7  |   |    |   |    |
| G | 6  | ✓ | ✓  | 6  | ✓ | ✓  |   |    |
| L | 7  | ✓ | ✓  | 5  | ✓ |    |   |    |
| F | 8  |   |    | 4  | ✓ |    |   |    |
| E | 9  | ✓ |    | 3  |   |    |   |    |
| Y | 10 |   | ✓  | 2  |   |    |   |    |
| R | 11 | ✓ | ✓  | 1  |   |    |   |    |

Y M R E F G L F E Y R

dbValid true EPIRDYELRMLR PHOS(1) 2. 837. -1.09218 5.19918 100. ? 4482.  
 S\_Acido\_new%gi|68566880|gb|AAY79809.1| EPIRDYELRMLR%:::PHOS:::sample\_0%compd\_2765

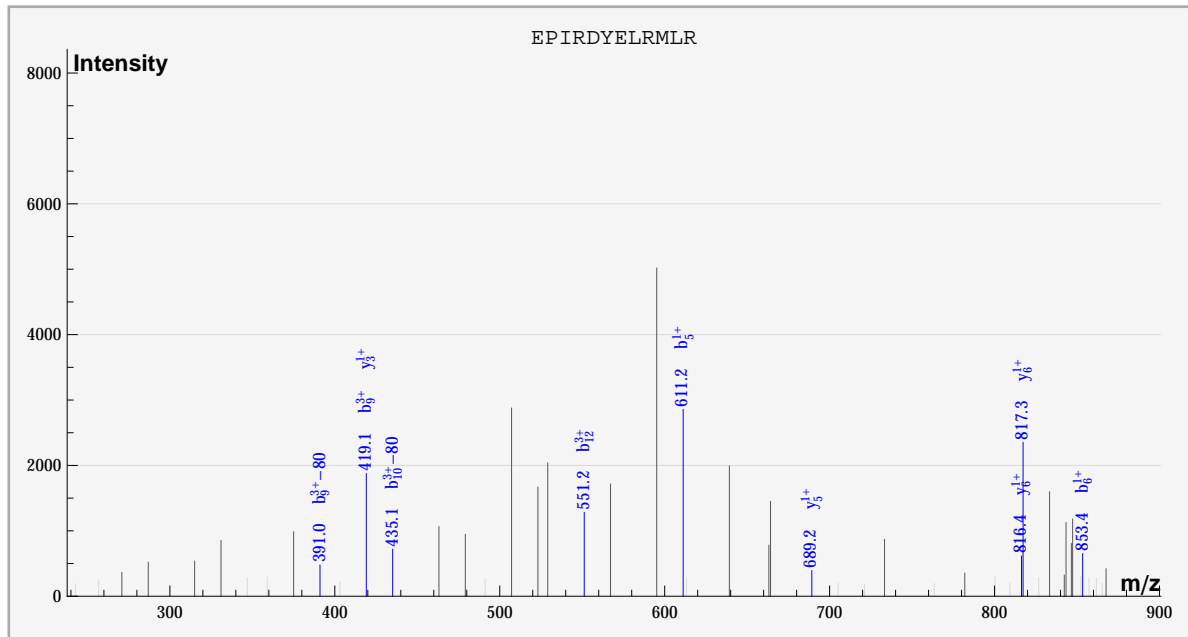

|   | #  | b | b* | #  | y | y* | P | P* |
|---|----|---|----|----|---|----|---|----|
| E | 1  |   |    |    |   |    |   |    |
| P | 2  |   |    | 11 |   |    |   |    |
| I | 3  |   |    | 10 |   |    |   |    |
| R | 4  |   |    | 9  |   |    |   |    |
| D | 5  | ✓ |    | 8  |   |    |   |    |
| Y | 6  | ✓ |    | 7  |   |    |   |    |
| E | 7  |   |    | 6  | ✓ |    |   |    |
| L | 8  |   |    | 5  | ✓ |    |   |    |
| R | 9  | ✓ | ✓  | 4  |   |    |   |    |
| M | 10 |   | ✓  | 3  | ✓ |    |   |    |
| L | 11 |   |    | 2  |   |    |   |    |
| R | 12 | ✓ |    | 1  |   |    |   |    |

E P I R D Y E L R M L R

dbValid true EPIRDYELRMLR PHOS(1) 2. 837. -1.09218 4.99245 100. ? 4494.  
 S\_Acido\_new%gi|68566880|gb|AA79809.1| EPIRDYELRMLR%:::PHOS:::sample\_0%compd\_2775

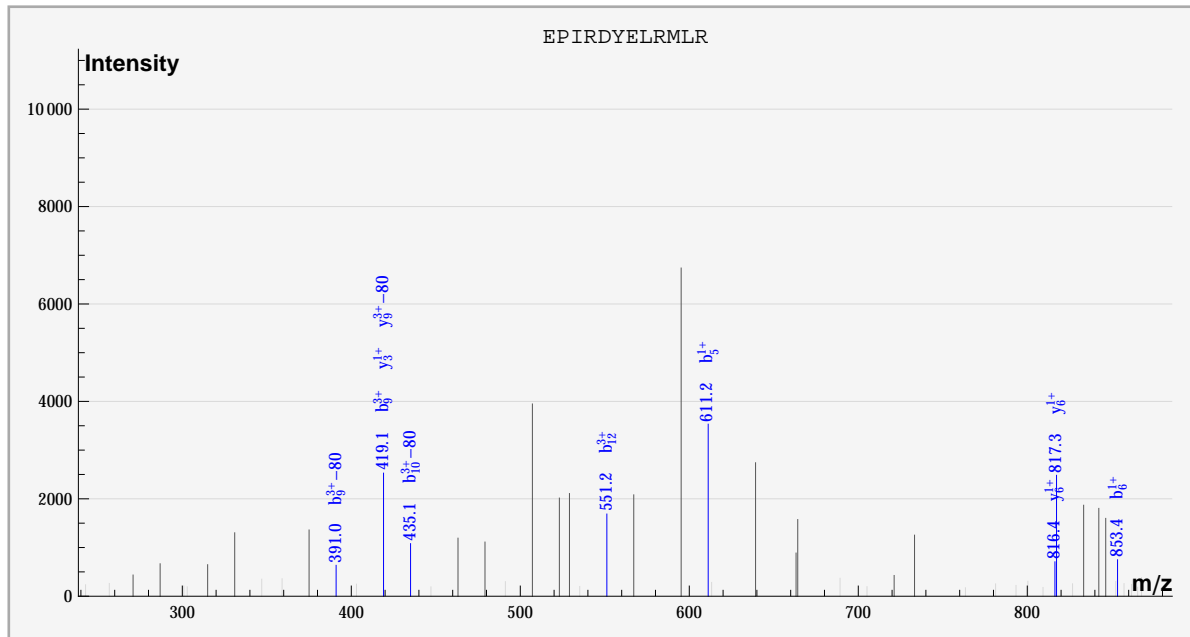

|   | #  | b | b* | #  | y | y* | P | P* |
|---|----|---|----|----|---|----|---|----|
| E | 1  |   |    |    |   |    |   |    |
| P | 2  |   |    | 11 |   |    |   |    |
| I | 3  |   |    | 10 |   |    |   |    |
| R | 4  |   |    | 9  |   | ✓  |   |    |
| D | 5  | ✓ |    | 8  |   |    |   |    |
| Y | 6  | ✓ |    | 7  |   |    |   |    |
| E | 7  |   |    | 6  | ✓ |    |   |    |
| L | 8  |   |    | 5  |   |    |   |    |
| R | 9  | ✓ | ✓  | 4  |   |    |   |    |
| M | 10 |   | ✓  | 3  | ✓ |    |   |    |
| L | 11 |   |    | 2  |   |    |   |    |
| R | 12 | ✓ |    | 1  |   |    |   |    |

E P I R D Y E L R M L R

dbValid true LMYDNKPIMWQK Oxidation\_M(2),PHOS(1) 2. 838.  
 1.87205 5.63582 100. ? 2292. S\_Acido\_new%gi|68568686|gb|AAY81615.1|  
 LMYDNKPIMWQK%::Oxidation\_M:PHOS:::Oxidation\_M:::sample\_0%compd\_875

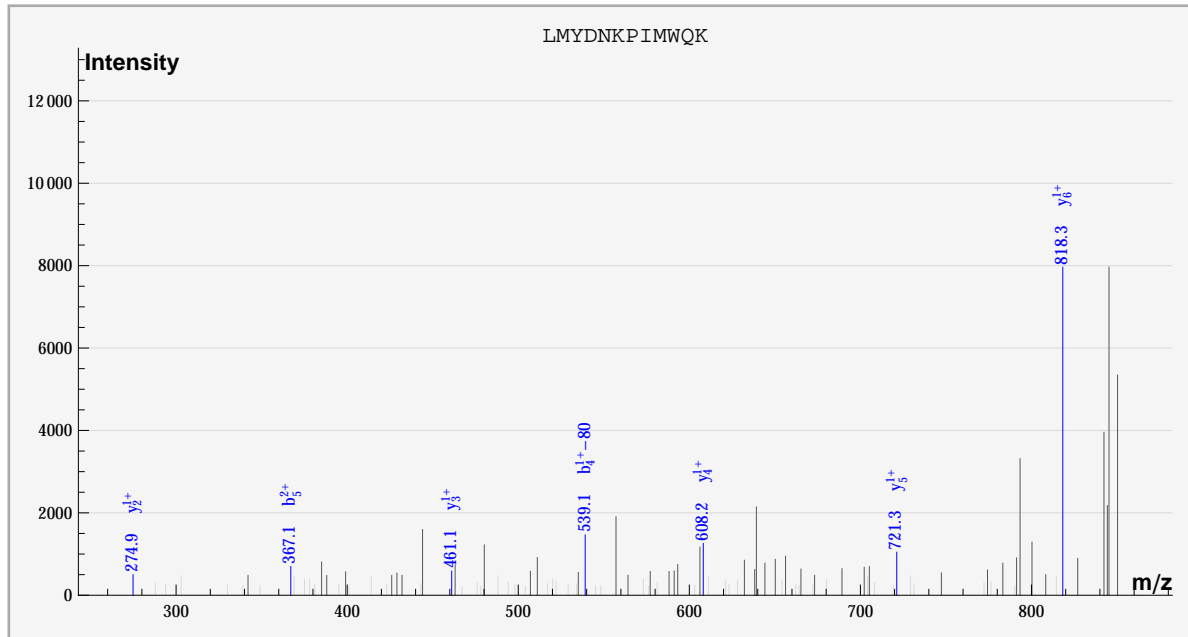

|   | #  | b | b* | #  | y | y* | P | P* |
|---|----|---|----|----|---|----|---|----|
| L | 1  |   |    |    |   |    |   |    |
| M | 2  |   |    | 11 |   |    |   |    |
| Y | 3  |   |    | 10 |   |    |   |    |
| D | 4  |   | ✓  | 9  |   |    |   |    |
| N | 5  | ✓ |    | 8  |   |    |   |    |
| K | 6  |   |    | 7  |   |    |   |    |
| P | 7  |   |    | 6  | ✓ |    |   |    |
| I | 8  |   |    | 5  | ✓ |    |   |    |
| M | 9  |   |    | 4  | ✓ |    |   |    |
| W | 10 |   |    | 3  | ✓ |    |   |    |
| Q | 11 |   |    | 2  | ✓ |    |   |    |
| K | 12 |   |    | 1  |   |    |   |    |

L M Y D N K P I M W Q K

dbValid true LMYDNKPIWQK Oxidation\_M(2),PHOS(1) 2. 838.  
 1.87205 5.42529 100. ? 2304. S\_Acido\_new%gi|68568686|gb|AAY81615.1|  
 LMYDNKPIWQK%::Oxidation\_M:PHOS:::Oxidation\_M:::sample\_0%compd\_885

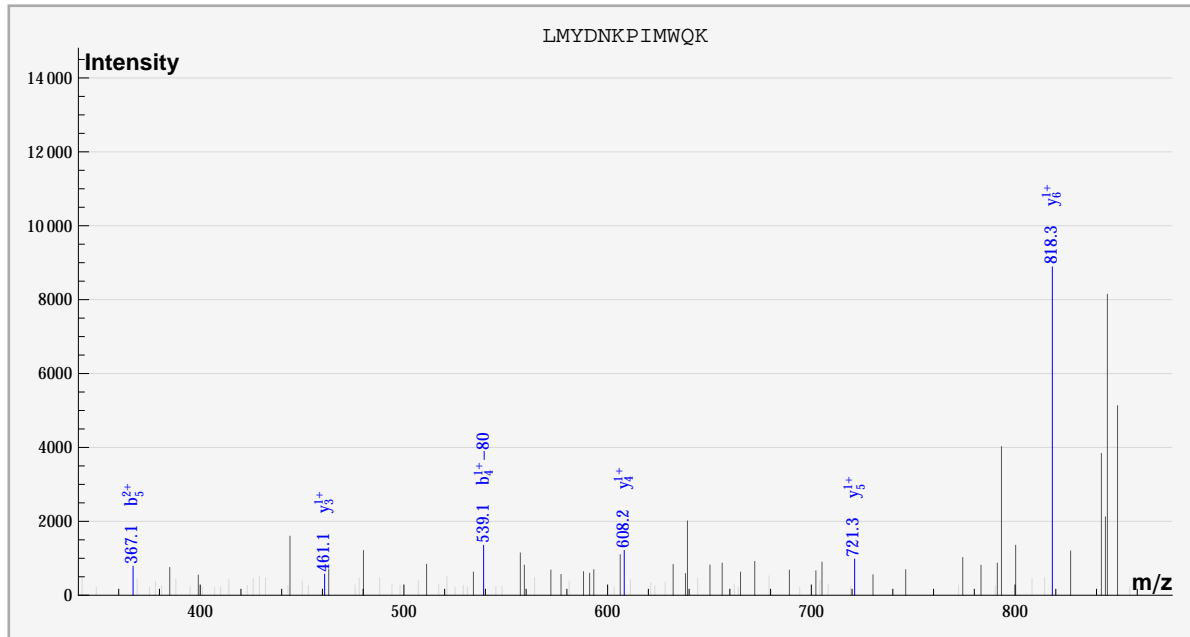

|   | #  | b | b* | #  | y | y* | P | P* |
|---|----|---|----|----|---|----|---|----|
| L | 1  |   |    |    |   |    |   |    |
| M | 2  |   |    | 11 |   |    |   |    |
| Y | 3  |   |    | 10 |   |    |   |    |
| D | 4  |   | ✓  | 9  |   |    |   |    |
| N | 5  | ✓ |    | 8  |   |    |   |    |
| K | 6  |   |    | 7  |   |    |   |    |
| P | 7  |   |    | 6  | ✓ |    |   |    |
| I | 8  |   |    | 5  | ✓ |    |   |    |
| M | 9  |   |    | 4  | ✓ |    |   |    |
| W | 10 |   |    | 3  | ✓ |    |   |    |
| Q | 11 |   |    | 2  |   |    |   |    |
| K | 12 |   |    | 1  |   |    |   |    |

L M Y D N K P I M W Q K



dbValid true LMYDNKPIMWQK Oxidation\_M(2),PHOS(1) 2. 838.  
 1.87205 5.86094 100. ? 2316. S\_Acido\_new%g|68568686|gb|AAY81615.1|  
 LMYDNKPIMWQK%::Oxidation\_M:PHOS:::Oxidation\_M:::sample\_0%compd\_896

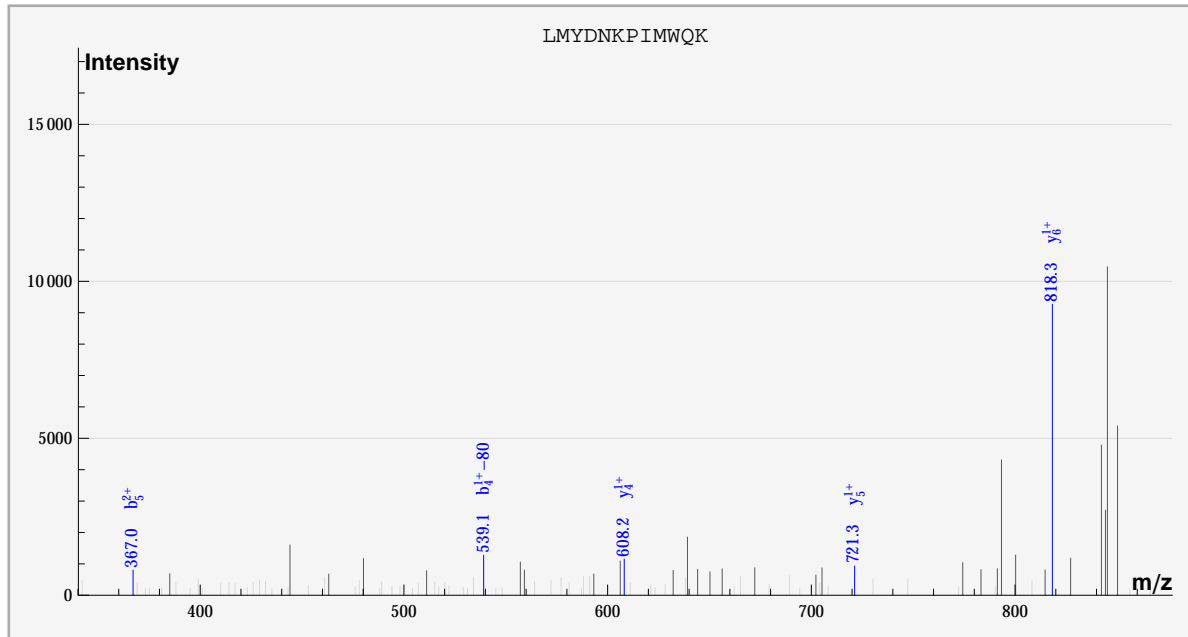

|   | #  | b | b* | #  | y | y* | P | P* |
|---|----|---|----|----|---|----|---|----|
| L | 1  |   |    |    |   |    |   |    |
| M | 2  |   |    | 11 |   |    |   |    |
| Y | 3  |   |    | 10 |   |    |   |    |
| D | 4  |   | ✓  | 9  |   |    |   |    |
| N | 5  | ✓ |    | 8  |   |    |   |    |
| K | 6  |   |    | 7  |   |    |   |    |
| P | 7  |   |    | 6  | ✓ |    |   |    |
| I | 8  |   |    | 5  | ✓ |    |   |    |
| M | 9  |   |    | 4  | ✓ |    |   |    |
| W | 10 |   |    | 3  |   |    |   |    |
| Q | 11 |   |    | 2  |   |    |   |    |
| K | 12 |   |    | 1  |   |    |   |    |

L M Y D N K P I M W Q K

dbValid true YSKDFTGSVMQR Oxidation\_M(1),PHOS(3) 2. 838.  
 -0.212818 5.56735 100. ? 3306. S\_Acido\_new%gi|68567517|gb|AAy80446.1|  
 YSKDFTGSVMQR%:PHOS:PHOS:::PHOS:::Oxidation\_M:::sample\_0%compd\_1745

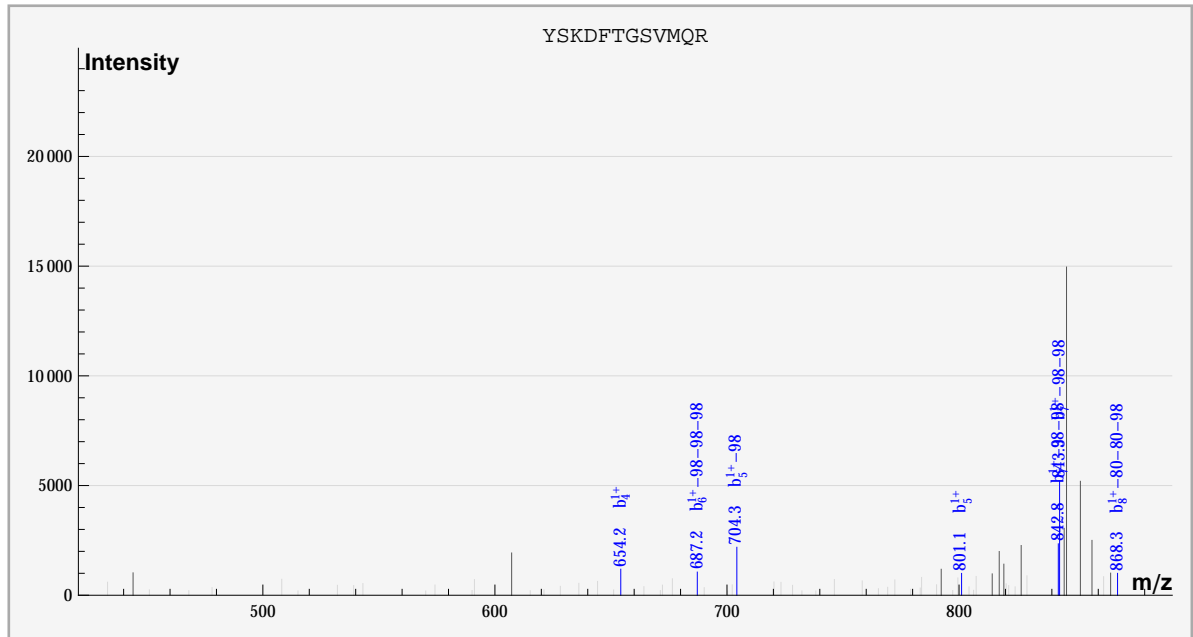

|   | #  | b | b* | #  | y | y* | P | P* |
|---|----|---|----|----|---|----|---|----|
| Y | 1  |   |    |    |   |    |   |    |
| S | 2  |   |    | 11 |   |    |   |    |
| K | 3  |   |    | 10 |   |    |   |    |
| D | 4  | ✓ |    | 9  |   |    |   |    |
| F | 5  | ✓ | ✓  | 8  |   |    |   |    |
| T | 6  |   | ✓  | 7  |   |    |   |    |
| G | 7  |   | ✓  | 6  |   |    |   |    |
| S | 8  |   | ✓  | 5  |   |    |   |    |
| V | 9  |   |    | 4  |   |    |   |    |
| M | 10 |   |    | 3  |   |    |   |    |
| Q | 11 |   |    | 2  |   |    |   |    |
| R | 12 |   |    | 1  |   |    |   |    |

Y S K D \_ F \_ T \_ G \_ S \_ V M Q R

dbValid true YSKDFTGSVMQR Oxidation\_M(1),PHOS(3) 2. 838.  
 -0.212818 5.11089 100. ? 3318. S\_Acido\_new%gi|68567517|gb|AAY80446.1|  
 YSKDFTGSVMQR%:PHOS:PHOS:::PHOS:::Oxidation\_M:::sample\_0%compd\_1756

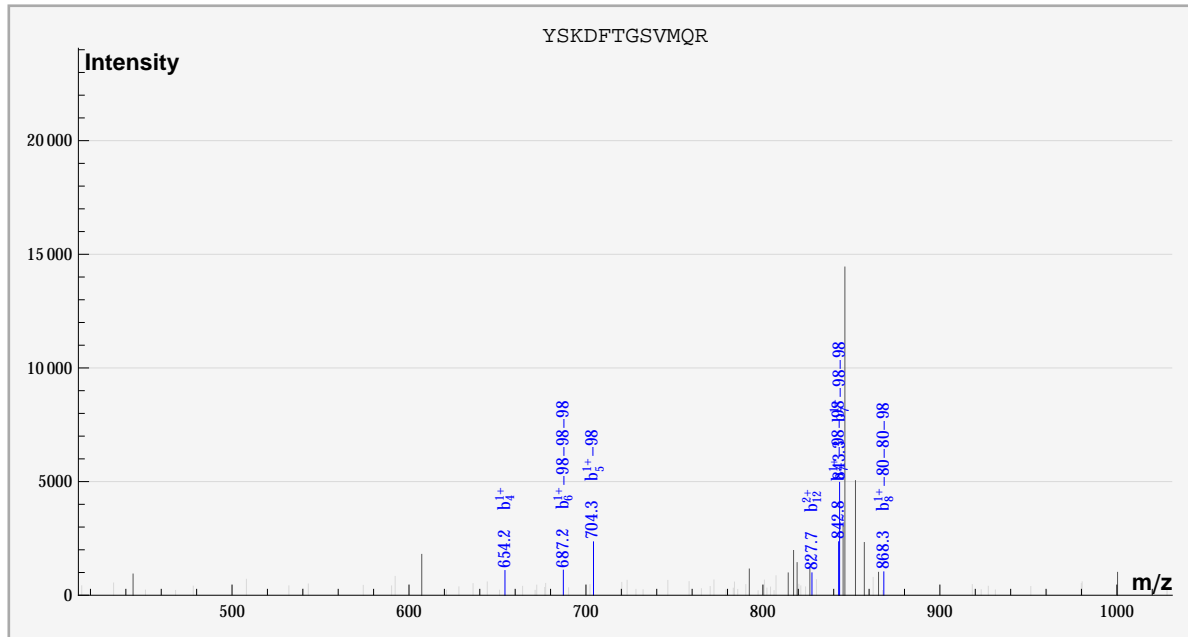

|   | #  | b | b* | #  | y | y* | P | P* |
|---|----|---|----|----|---|----|---|----|
| Y | 1  |   |    |    |   |    |   |    |
| S | 2  |   |    | 11 |   |    |   |    |
| K | 3  |   |    | 10 |   |    |   |    |
| D | 4  | ✓ |    | 9  |   |    |   |    |
| F | 5  |   | ✓  | 8  |   |    |   |    |
| T | 6  |   | ✓  | 7  |   |    |   |    |
| G | 7  |   | ✓  | 6  |   |    |   |    |
| S | 8  |   | ✓  | 5  |   |    |   |    |
| V | 9  |   |    | 4  |   |    |   |    |
| M | 10 |   |    | 3  |   |    |   |    |
| Q | 11 |   |    | 2  |   |    |   |    |
| R | 12 | ✓ |    | 1  |   |    |   |    |

Y S K D \_ F \_ T \_ G \_ S \_ V M Q R \_

dbValid true YSKDFTGSVMQR Oxidation\_M(1),PHOS(3) 2. 838.  
 -0.212818 5.4901 100. ? 3330. S\_Acido\_new%g|68567517|gb|AAY80446.1|  
 YSKDFTGSVMQR%:PHOS:PHOS:::PHOS:::Oxidation\_M:::sample\_0%compd\_1766

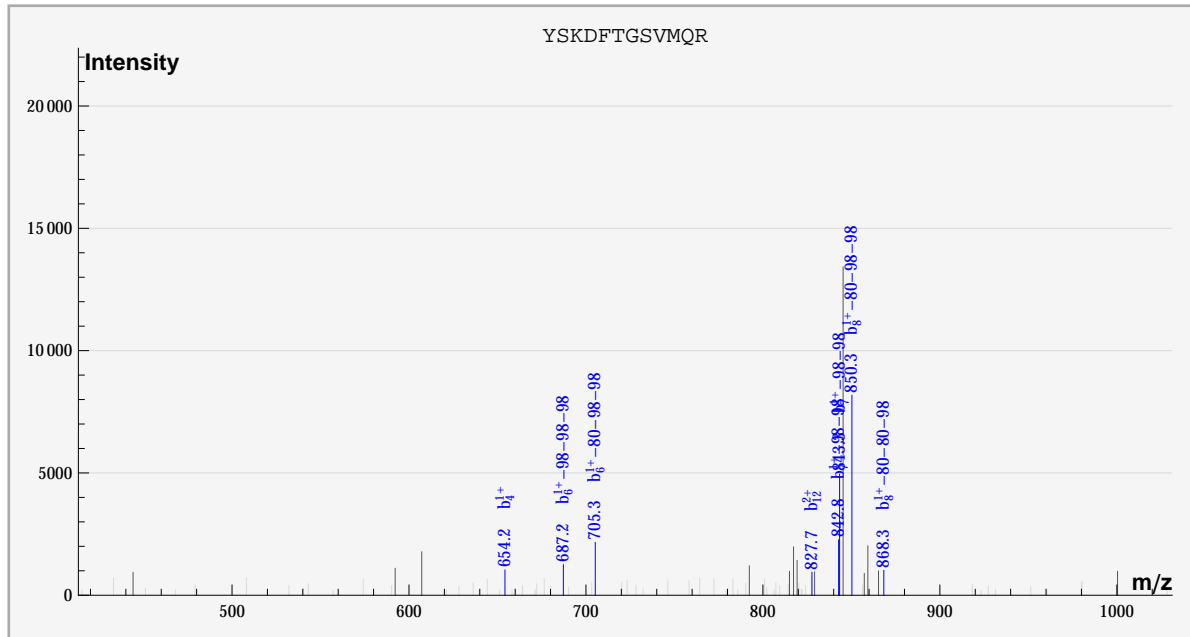

|   | #  | b | b* | #  | y | y* | P | P* |
|---|----|---|----|----|---|----|---|----|
| Y | 1  |   |    |    |   |    |   |    |
| S | 2  |   |    | 11 |   |    |   |    |
| K | 3  |   |    | 10 |   |    |   |    |
| D | 4  | ✓ |    | 9  |   |    |   |    |
| F | 5  |   |    | 8  |   |    |   |    |
| T | 6  |   | ✓  | 7  |   |    |   |    |
| G | 7  |   | ✓  | 6  |   |    |   |    |
| S | 8  |   | ✓  | 5  |   |    |   |    |
| V | 9  |   |    | 4  |   |    |   |    |
| M | 10 |   |    | 3  |   |    |   |    |
| Q | 11 |   |    | 2  |   |    |   |    |
| R | 12 | ✓ |    | 1  |   |    |   |    |

Y S K D F T G S V M Q R

dbValid true NDYTED PHOS(1) 1. 838. -1.76544 4.99224 100. ? 3366.  
 S\_Acido\_new%gi|68566787|gb|AAY79716.1| NDYTED%:::PHOS:::sample\_0%compd\_1796

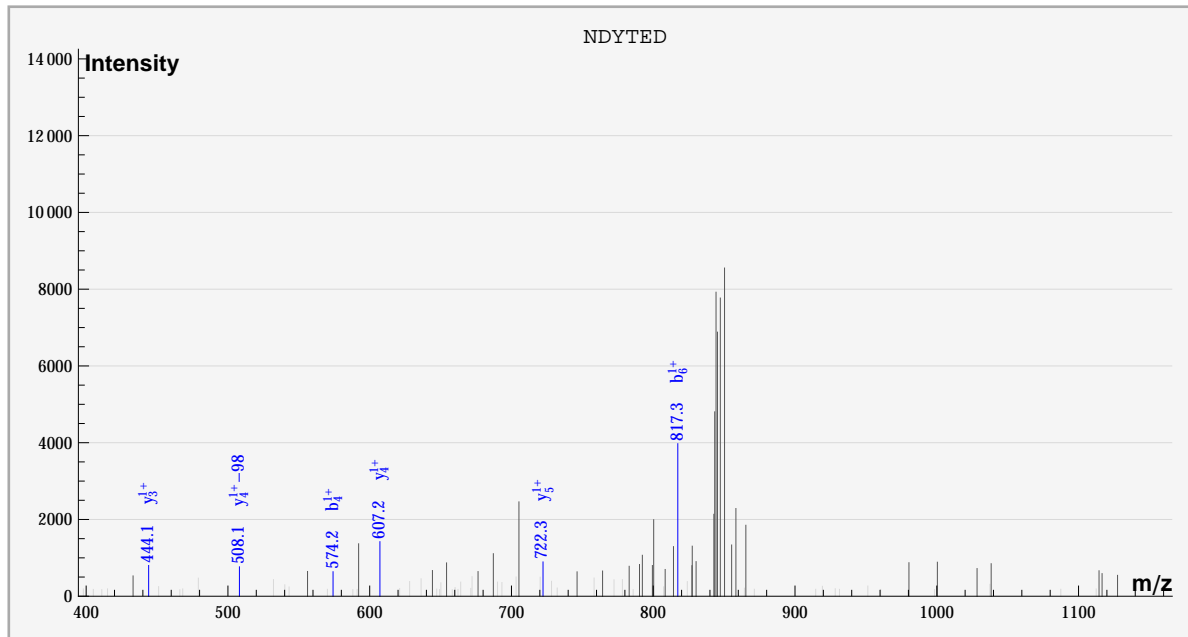

|   | # | b | b* | # | y | y* | P | P* |
|---|---|---|----|---|---|----|---|----|
| N | 1 |   |    |   |   |    |   |    |
| D | 2 |   |    | 5 | ✓ |    |   |    |
| Y | 3 |   |    | 4 | ✓ | ✓  |   |    |
| T | 4 | ✓ |    | 3 | ✓ |    |   |    |
| E | 5 |   |    | 2 |   |    |   |    |
| D | 6 | ✓ |    | 1 |   |    |   |    |

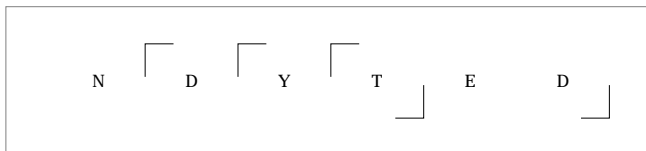

dbValid true DALVGASK PHOS(1) 1. 842. -1.61377 5.28347 100. ? 1686.  
 S\_Acido\_new%gi68568496|gb|AAY81425.1| DALVGASK%:::PHOS::%sample\_1%cmpd\_367

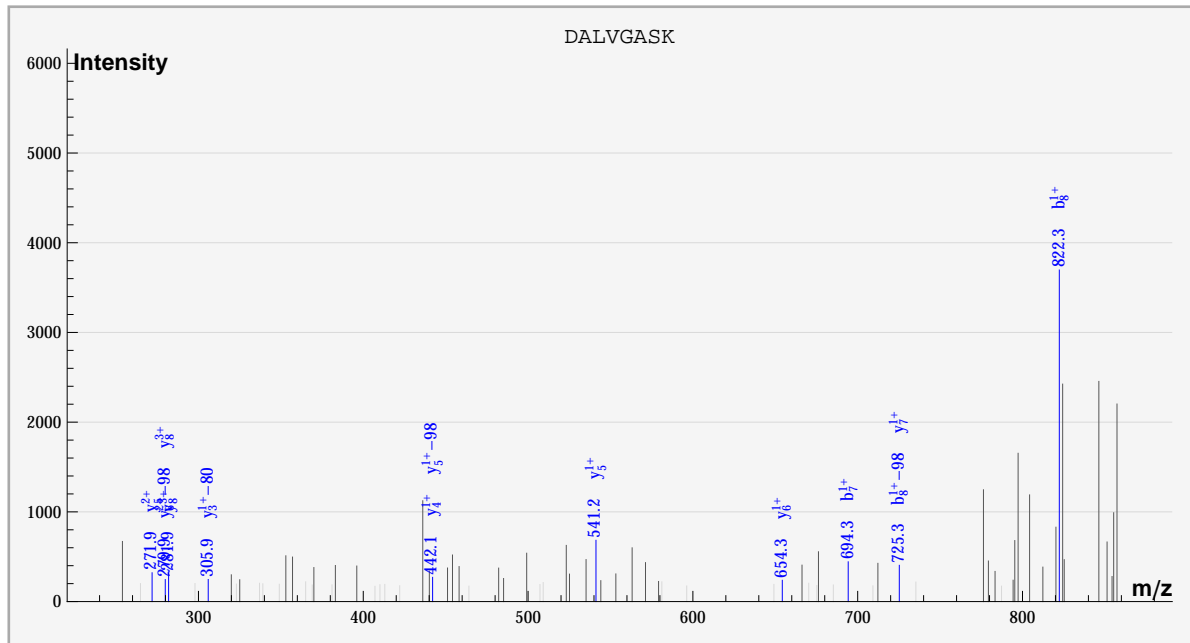

|   | # | b | b* | # | y | y* | P | P* |
|---|---|---|----|---|---|----|---|----|
| D | 1 |   |    |   |   |    |   | ✓  |
| A | 2 |   |    | 7 | ✓ |    |   |    |
| L | 3 |   |    | 6 | ✓ | ✓  |   |    |
| V | 4 |   |    | 5 | ✓ | ✓  |   |    |
| G | 5 |   |    | 4 | ✓ |    |   |    |
| A | 6 |   |    | 3 |   | ✓  |   |    |
| S | 7 | ✓ |    | 2 |   |    |   |    |
| K | 8 | ✓ | ✓  | 1 |   |    |   |    |

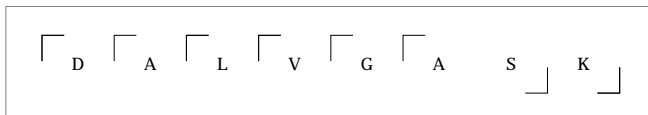

dbValid true AGDSAIVK PHOS(1) 1. 842. -1.61377 5.62328 100. ? 2496.  
 S\_Acido\_new%gi|68567136|gb|AAY80065.1| AGDSAIVK%::::PHOS::::%sample\_1%cmpd\_1054

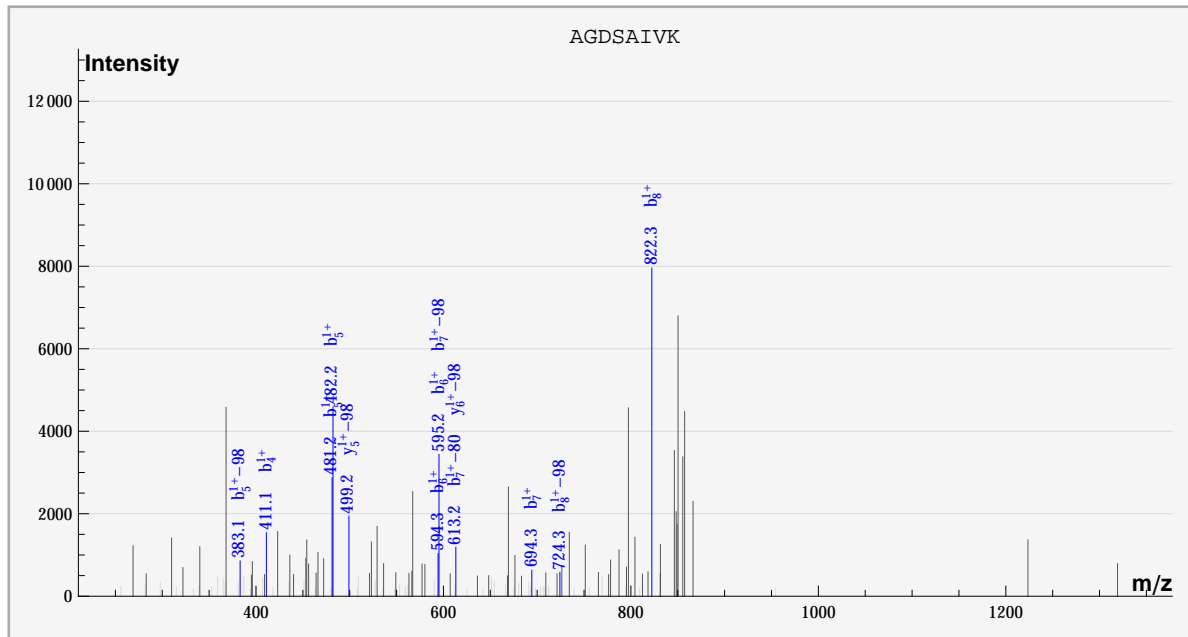

|   | # | b | b* | # | y | y* | P | P* |
|---|---|---|----|---|---|----|---|----|
| A | 1 |   |    |   |   |    |   |    |
| G | 2 |   |    | 7 |   |    |   |    |
| D | 3 |   |    | 6 |   | ✓  |   |    |
| S | 4 | ✓ |    | 5 |   | ✓  |   |    |
| A | 5 | ✓ | ✓  | 4 |   |    |   |    |
| I | 6 | ✓ |    | 3 |   |    |   |    |
| V | 7 | ✓ | ✓  | 2 |   |    |   |    |
| K | 8 | ✓ | ✓  | 1 |   |    |   |    |

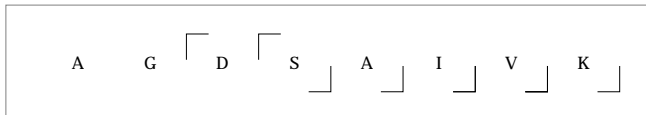

dbValid true AGDSAIVK PHOS(1) 1. 842. -1.61377 5.20853 100. ? 2508.  
 S\_Acido\_new%gi|68567136|gb|AAY80065.1| AGDSAIVK%::::PHOS::::%sample\_1%cmpd\_1064

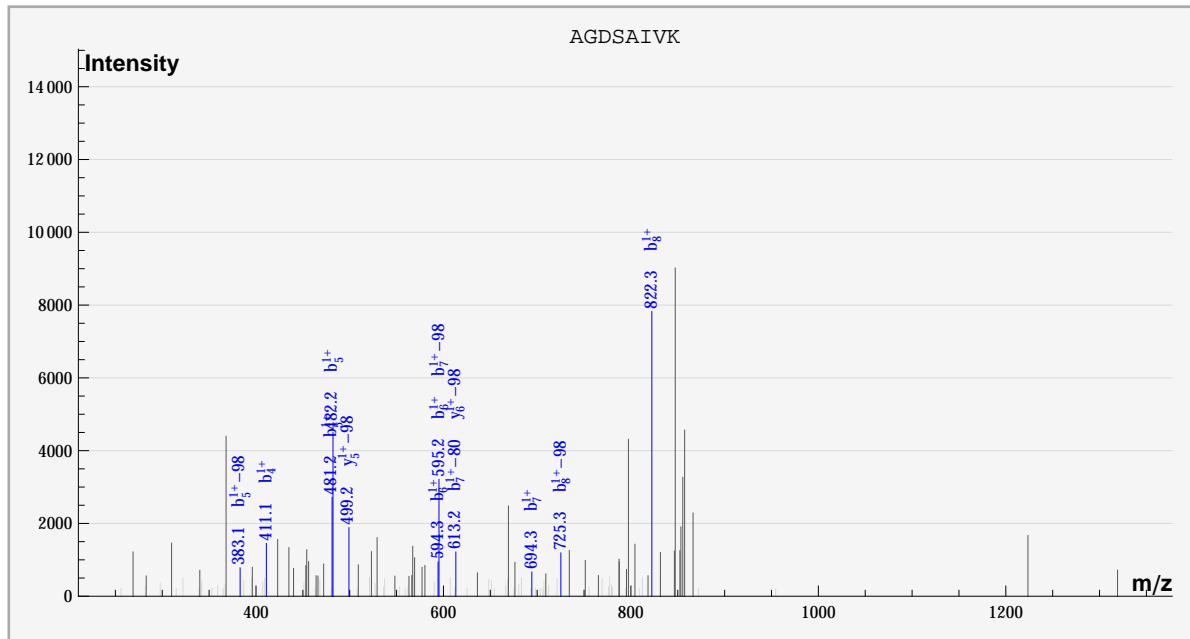

|   | # | b | b* | # | y | y* | P | P* |
|---|---|---|----|---|---|----|---|----|
| A | 1 |   |    |   |   |    |   |    |
| G | 2 |   |    | 7 |   |    |   |    |
| D | 3 |   |    | 6 |   | ✓  |   |    |
| S | 4 | ✓ |    | 5 |   | ✓  |   |    |
| A | 5 | ✓ | ✓  | 4 |   |    |   |    |
| I | 6 | ✓ |    | 3 |   |    |   |    |
| V | 7 | ✓ | ✓  | 2 |   |    |   |    |
| K | 8 | ✓ | ✓  | 1 |   |    |   |    |

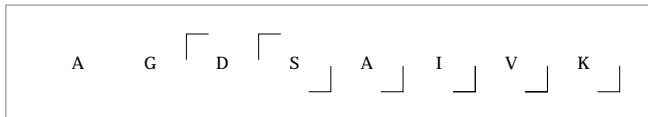



dbValid true AGDSAIVK PHOS(1) 1. 842. -1.61377 5.26799 100. ? 2520.  
 S\_Acido\_new%gi|68567136|gb|AAY80065.1| AGDSAIVK%::::PHOS::::%sample\_1%cmpd\_1075

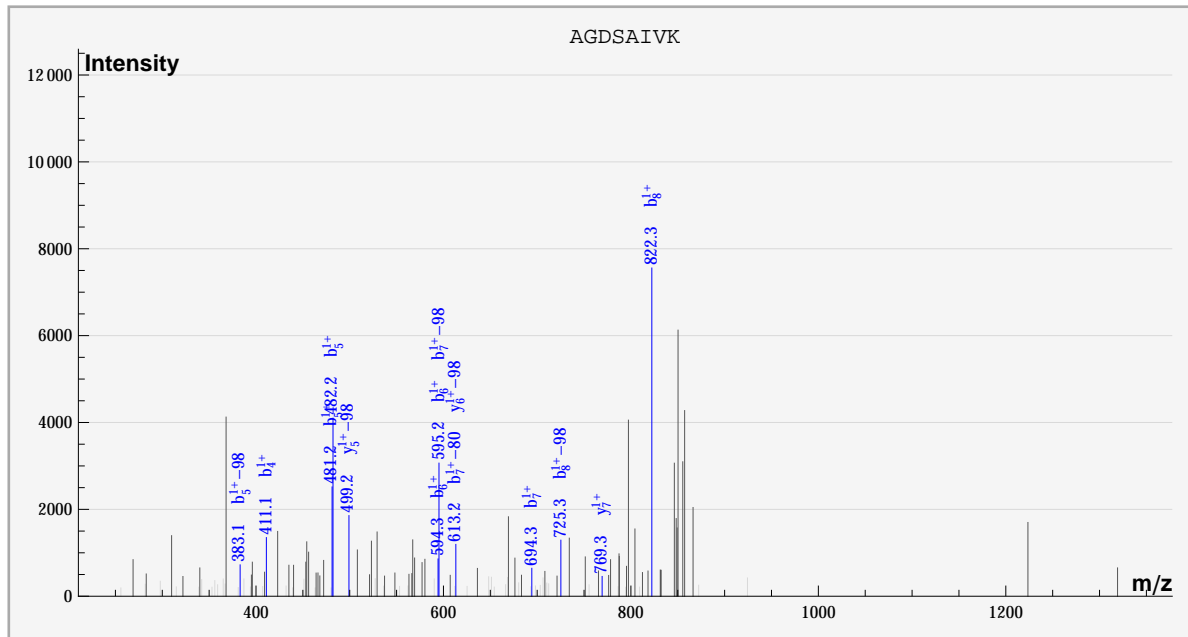

|   | # | b | b* | # | y | y* | P | P* |
|---|---|---|----|---|---|----|---|----|
| A | 1 |   |    |   |   |    |   |    |
| G | 2 |   |    | 7 | ✓ |    |   |    |
| D | 3 |   |    | 6 |   | ✓  |   |    |
| S | 4 | ✓ |    | 5 |   | ✓  |   |    |
| A | 5 | ✓ | ✓  | 4 |   |    |   |    |
| I | 6 | ✓ |    | 3 |   |    |   |    |
| V | 7 | ✓ | ✓  | 2 |   |    |   |    |
| K | 8 | ✓ | ✓  | 1 |   |    |   |    |

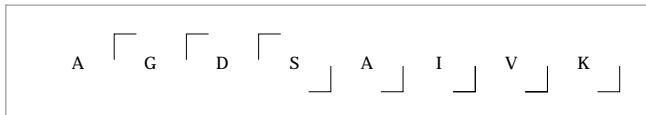

dbValid true AGDSAIVK PHOS(1) 1. 842. -1.61377 5.52795 100. ? 2532.  
 S\_Acido\_new%gi|68567136|gb|AAY80065.1| AGDSAIVK%::::PHOS::::%sample\_1%compd\_1085

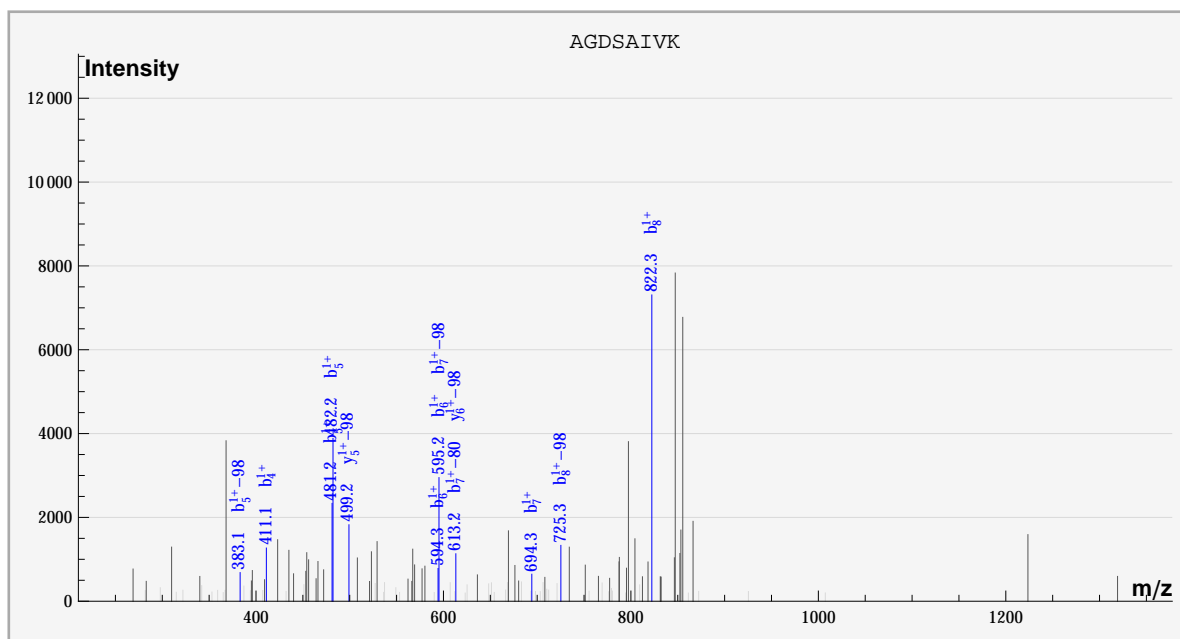

|   | # | b | b* | # | y | y* | P | P* |
|---|---|---|----|---|---|----|---|----|
| A | 1 |   |    |   |   |    |   |    |
| G | 2 |   |    | 7 |   |    |   |    |
| D | 3 |   |    | 6 |   | ✓  |   |    |
| S | 4 | ✓ |    | 5 |   | ✓  |   |    |
| A | 5 | ✓ | ✓  | 4 |   |    |   |    |
| I | 6 | ✓ |    | 3 |   |    |   |    |
| V | 7 | ✓ | ✓  | 2 |   |    |   |    |
| K | 8 | ✓ | ✓  | 1 |   |    |   |    |

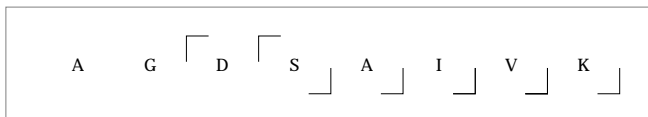

dbValid true AGDSAIVK PHOS(1) 1. 842. -1.61377 5.5298 100. ? 2544.  
 S\_Acido\_new%gi|68567136|gb|AAI80065.1| AGDSAIVK%::::PHOS::::%sample\_1%cmpd\_1095

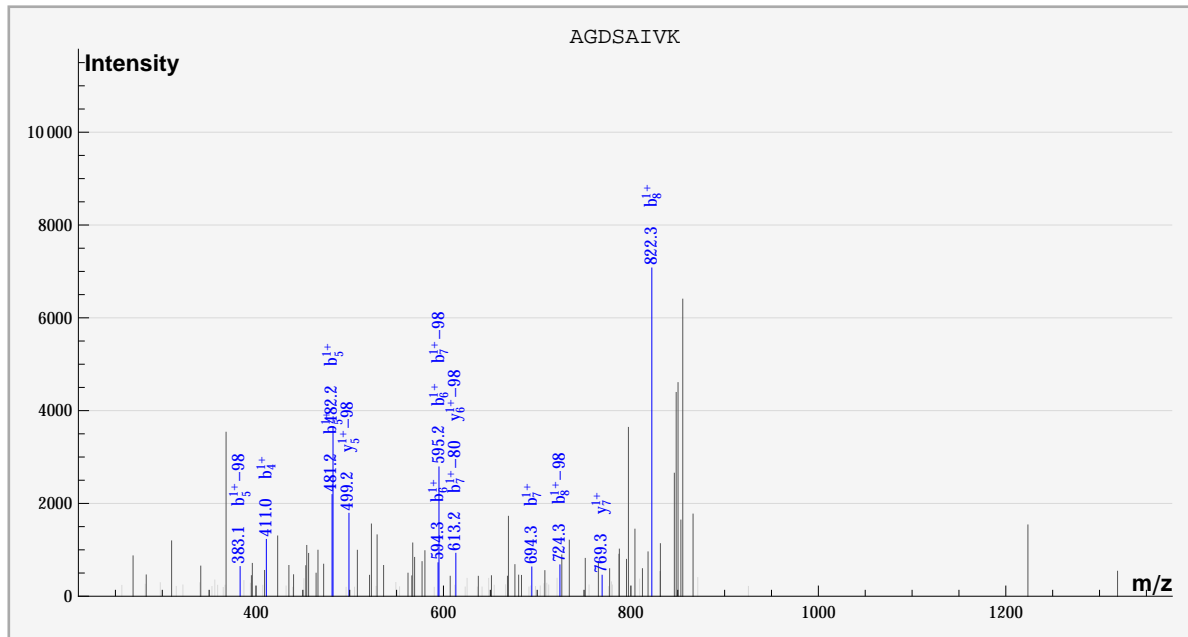

|   | # | b | b* | # | y | y* | P | P* |
|---|---|---|----|---|---|----|---|----|
| A | 1 |   |    |   |   |    |   |    |
| G | 2 |   |    | 7 | ✓ |    |   |    |
| D | 3 |   |    | 6 |   | ✓  |   |    |
| S | 4 | ✓ |    | 5 |   | ✓  |   |    |
| A | 5 | ✓ | ✓  | 4 |   |    |   |    |
| I | 6 | ✓ |    | 3 |   |    |   |    |
| V | 7 | ✓ | ✓  | 2 |   |    |   |    |
| K | 8 | ✓ | ✓  | 1 |   |    |   |    |

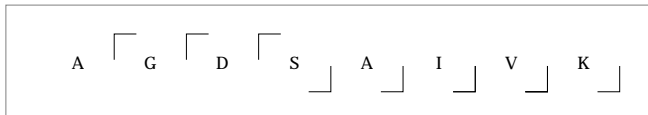

dbValid true AGDSAIVK PHOS(1) 1. 842. -1.61377 5.49648 100. ? 2556.  
 S\_Acido\_new%gi|68567136|gb|AAY80065.1| AGDSAIVK%::::PHOS::::%sample\_1%compd\_1105

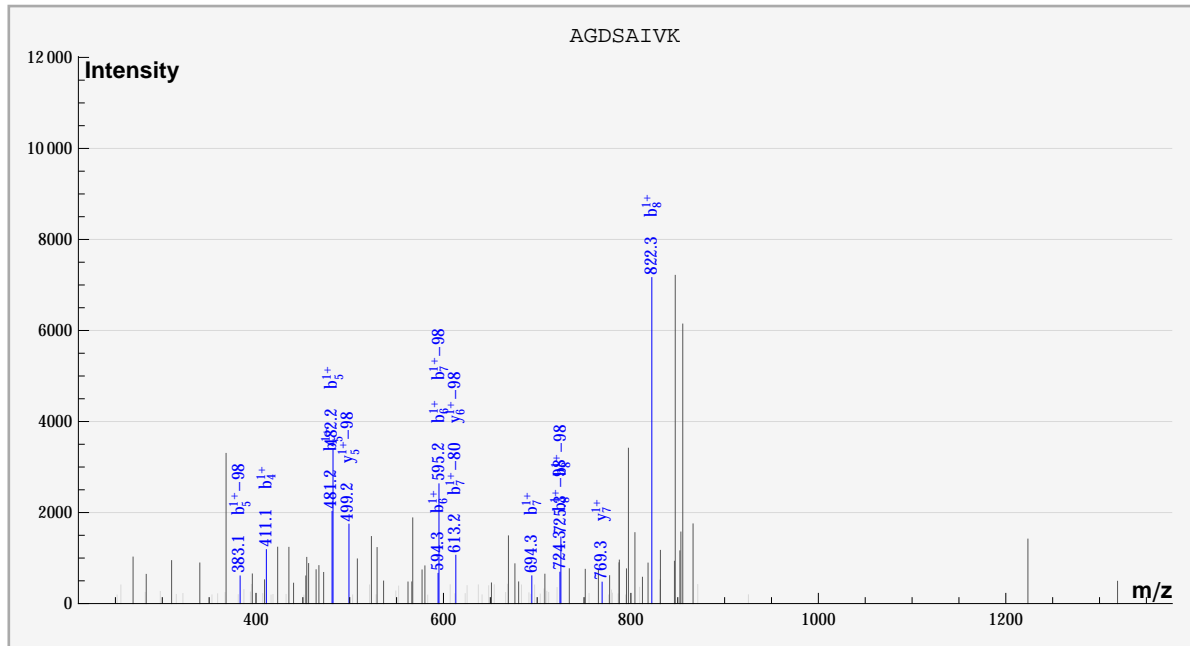

|   | # | b | b* | # | y | y* | P | P* |
|---|---|---|----|---|---|----|---|----|
| A | 1 |   |    |   |   |    |   |    |
| G | 2 |   |    | 7 | ✓ |    |   |    |
| D | 3 |   |    | 6 |   | ✓  |   |    |
| S | 4 | ✓ |    | 5 |   | ✓  |   |    |
| A | 5 | ✓ | ✓  | 4 |   |    |   |    |
| I | 6 | ✓ |    | 3 |   |    |   |    |
| V | 7 | ✓ | ✓  | 2 |   |    |   |    |
| K | 8 | ✓ | ✓  | 1 |   |    |   |    |

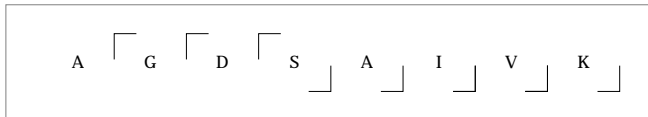

dbValid true AGDSAIVK PHOS(1) 1. 842. -1.61377 5.36408 100. ? 2574.  
 S\_Acido\_new%gi|68567136|gb|AAY80065.1| AGDSAIVK%::::PHOS::::%sample\_1%cmpd\_1115

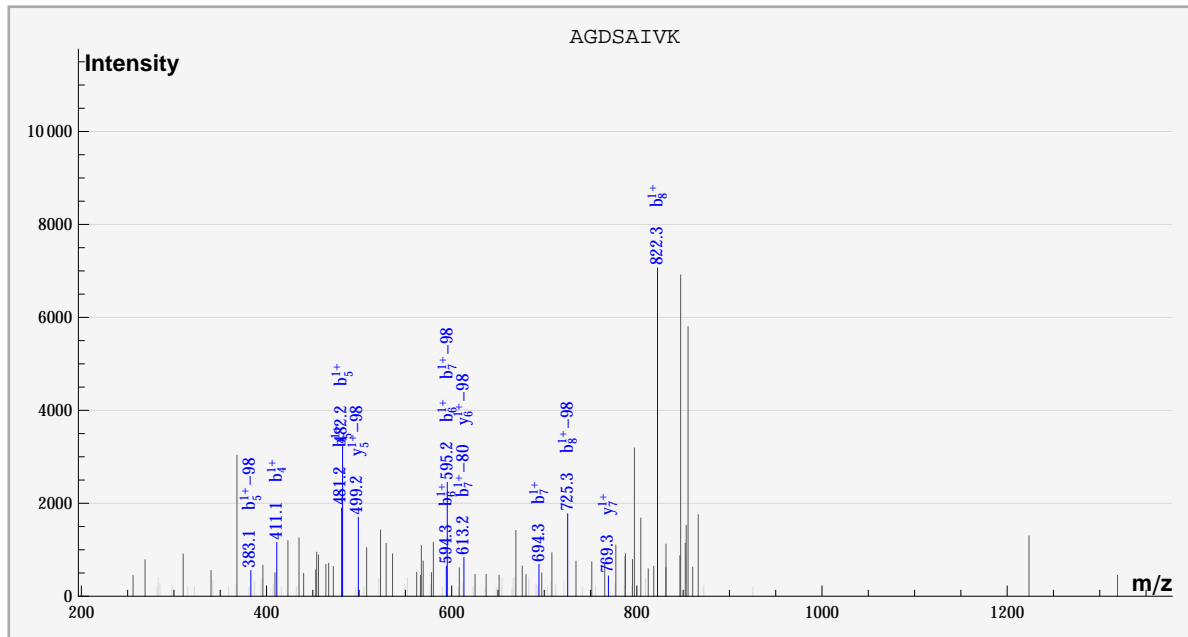

|   | # | b | b* | # | y | y* | P | P* |
|---|---|---|----|---|---|----|---|----|
| A | 1 |   |    |   |   |    |   |    |
| G | 2 |   |    | 7 | ✓ |    |   |    |
| D | 3 |   |    | 6 |   | ✓  |   |    |
| S | 4 | ✓ |    | 5 |   | ✓  |   |    |
| A | 5 | ✓ | ✓  | 4 |   |    |   |    |
| I | 6 | ✓ |    | 3 |   |    |   |    |
| V | 7 | ✓ | ✓  | 2 |   |    |   |    |
| K | 8 | ✓ | ✓  | 1 |   |    |   |    |



dbValid true AGDSAIVK PHOS(1) 1. 842. -1.61377 5.19824 100. ? 2586.  
 S\_Acido\_new%gi|68567136|gb|AAY80065.1| AGDSAIVK%::::PHOS::::%sample\_1%compd\_1126

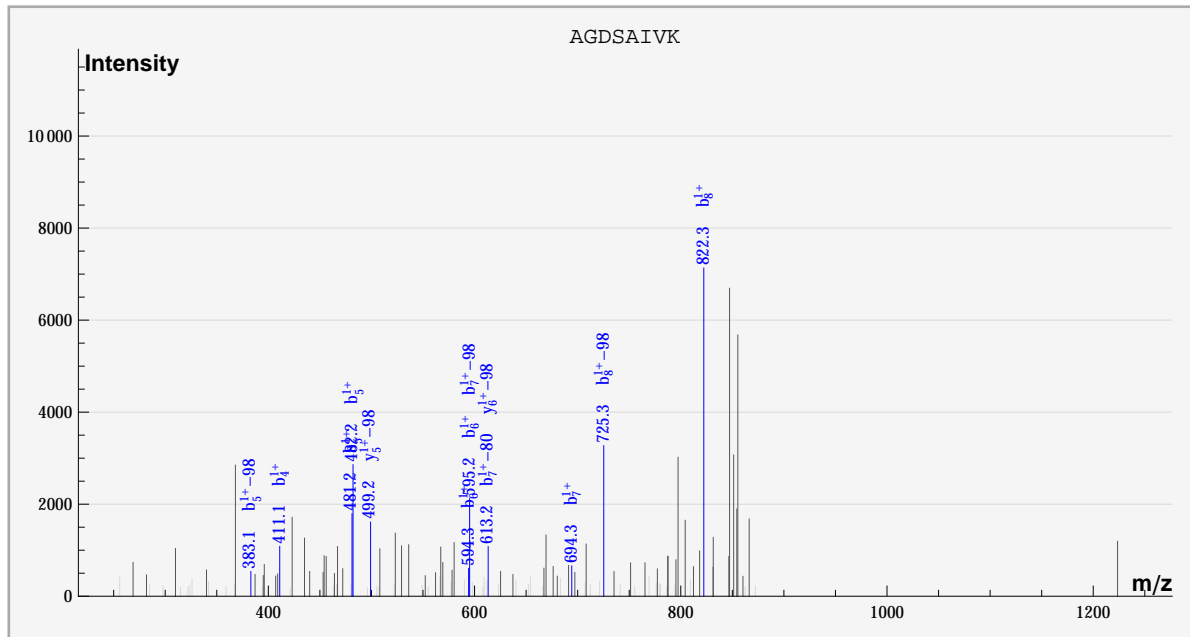

|   | # | b | b* | # | y | y* | P | P* |
|---|---|---|----|---|---|----|---|----|
| A | 1 |   |    |   |   |    |   |    |
| G | 2 |   |    | 7 |   |    |   |    |
| D | 3 |   |    | 6 |   | ✓  |   |    |
| S | 4 | ✓ |    | 5 |   | ✓  |   |    |
| A | 5 | ✓ | ✓  | 4 |   |    |   |    |
| I | 6 | ✓ |    | 3 |   |    |   |    |
| V | 7 | ✓ | ✓  | 2 |   |    |   |    |
| K | 8 | ✓ | ✓  | 1 |   |    |   |    |



dbValid true ATYMKLAANMAYR Oxidation\_M(1),PHOS(2) 2. 842. -1.66027 5.38605 100. ? 2808.  
 S\_Acido\_new%gil68568590|gb|AAY81519.1| ATYMKLAANMAYR%::PHOS:PHOS:Oxidation\_M:::sample\_1%cmpd\_1321

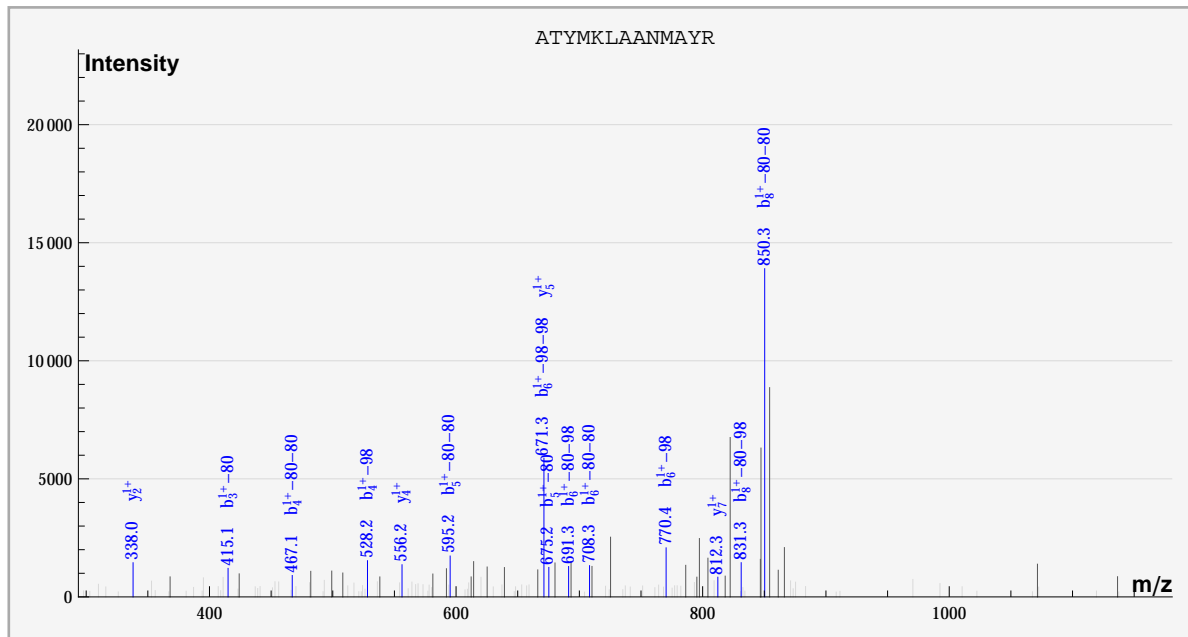

|   | #  | b | b* | #  | y | y* | P | P* |
|---|----|---|----|----|---|----|---|----|
| A | 1  |   |    |    |   |    |   |    |
| T | 2  |   |    | 12 |   |    |   |    |
| Y | 3  | ✓ |    | 11 |   |    |   |    |
| M | 4  | ✓ |    | 10 |   |    |   |    |
| K | 5  | ✓ |    | 9  |   |    |   |    |
| L | 6  | ✓ |    | 8  |   |    |   |    |
| A | 7  |   |    | 7  | ✓ |    |   |    |
| A | 8  | ✓ |    | 6  |   |    |   |    |
| N | 9  |   |    | 5  | ✓ |    |   |    |
| M | 10 |   |    | 4  | ✓ |    |   |    |
| A | 11 |   |    | 3  |   |    |   |    |
| Y | 12 |   |    | 2  | ✓ |    |   |    |
| R | 13 |   |    | 1  |   |    |   |    |

A T Y M K L A A N M A Y R

dbValid true ETGVISR PHOS(1) 1. 843. -1.61851 5.75216 100. ? 2412.  
 S\_Acido\_new%gi|68568331|gb|AAY81260.1| ETGVISR%:::PHOS::%sample\_1%compd\_982

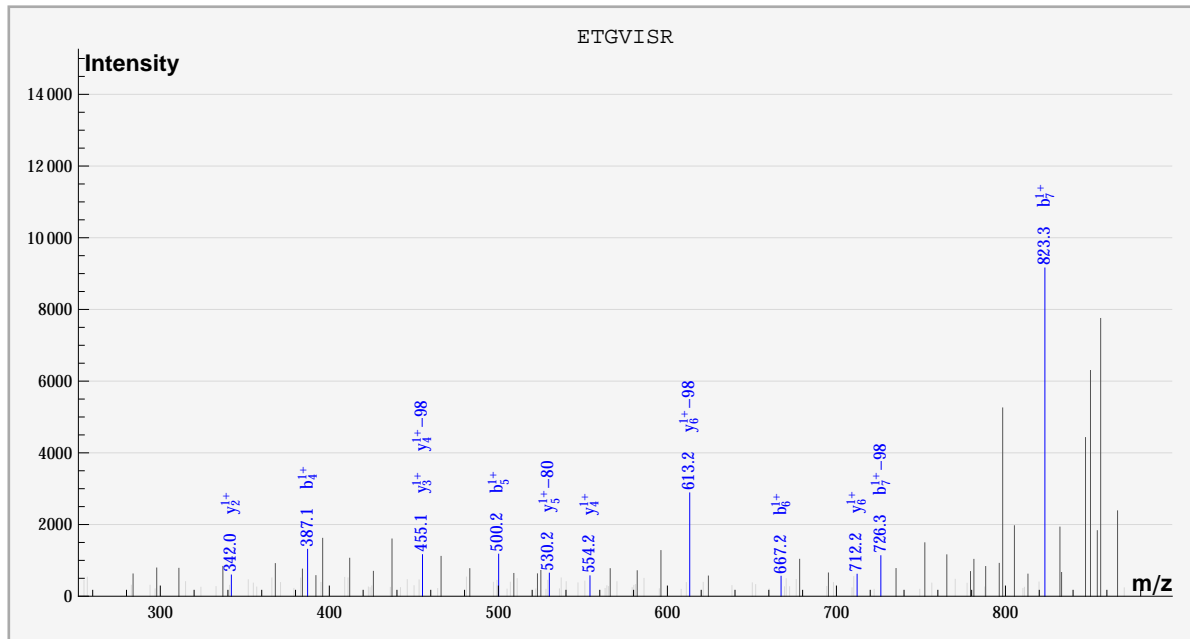

|   | # | b | b* | # | y | y* | P | P* |
|---|---|---|----|---|---|----|---|----|
| E | 1 |   |    |   |   |    |   |    |
| T | 2 |   |    | 6 | ✓ | ✓  |   |    |
| G | 3 |   |    | 5 |   | ✓  |   |    |
| V | 4 | ✓ |    | 4 | ✓ | ✓  |   |    |
| I | 5 | ✓ |    | 3 | ✓ |    |   |    |
| S | 6 | ✓ |    | 2 | ✓ |    |   |    |
| R | 7 | ✓ | ✓  | 1 |   |    |   |    |

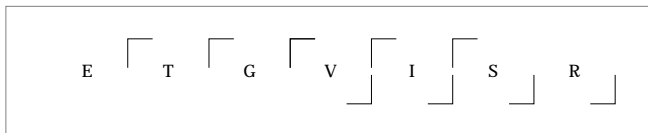



dbValid true ETGVISR PHOS(1) 1. 843. -1.61851 5.81135 100. ? 2496.  
 S\_Acido\_new%gi|68568331|gb|AAY81260.1| ETGVISR%:::PHOS::%sample\_1%compd\_1055

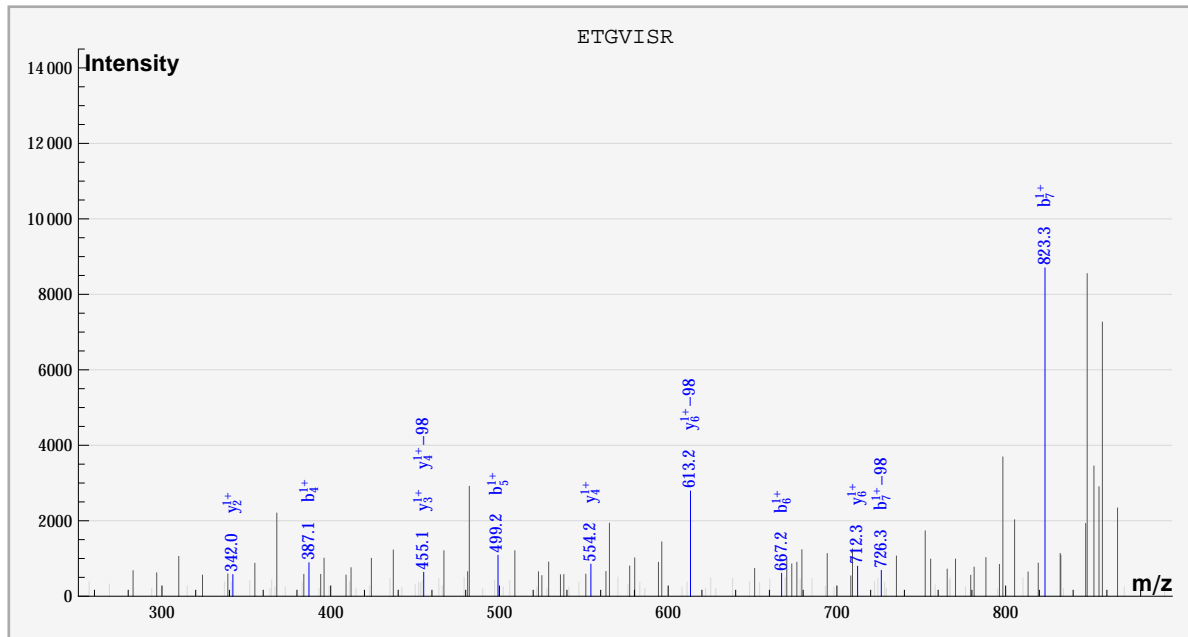

|   | # | b | b* | # | y | y* | P | P* |
|---|---|---|----|---|---|----|---|----|
| E | 1 |   |    |   |   |    |   |    |
| T | 2 |   |    | 6 | ✓ | ✓  |   |    |
| G | 3 |   |    | 5 |   |    |   |    |
| V | 4 | ✓ |    | 4 | ✓ | ✓  |   |    |
| I | 5 | ✓ |    | 3 | ✓ |    |   |    |
| S | 6 | ✓ |    | 2 | ✓ |    |   |    |
| R | 7 | ✓ | ✓  | 1 |   |    |   |    |

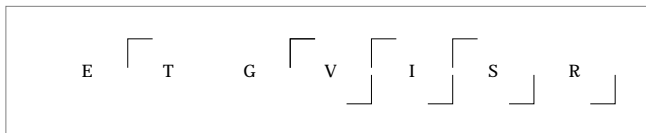

dbValid true ETGVISR PHOS(1) 1. 843. -1.61851 5.72454 100. ? 2508.  
 S\_Acido\_new%gi|68568331|gb|AAY81260.1| ETGVISR%:::::PHOS::%sample\_1%compd\_1065

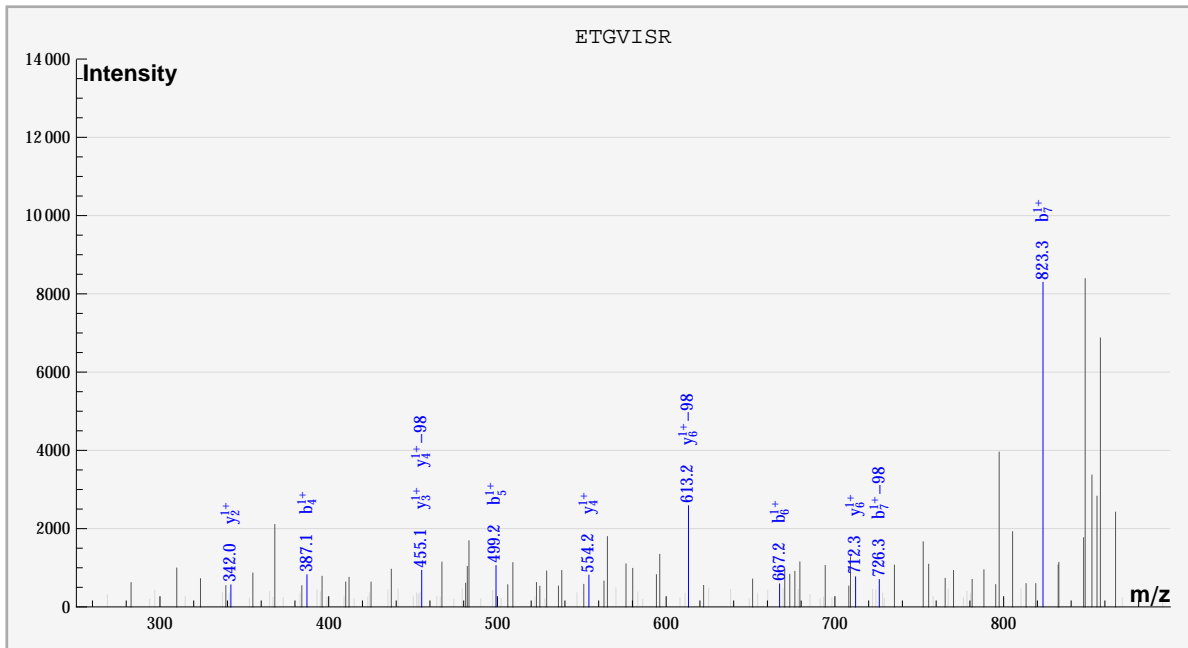

|   | # | b | b* | # | y | y* | P | P* |
|---|---|---|----|---|---|----|---|----|
| E | 1 |   |    |   |   |    |   |    |
| T | 2 |   |    | 6 | ✓ | ✓  |   |    |
| G | 3 |   |    | 5 |   |    |   |    |
| V | 4 | ✓ |    | 4 | ✓ | ✓  |   |    |
| I | 5 | ✓ |    | 3 | ✓ |    |   |    |
| S | 6 | ✓ |    | 2 | ✓ |    |   |    |
| R | 7 | ✓ | ✓  | 1 |   |    |   |    |

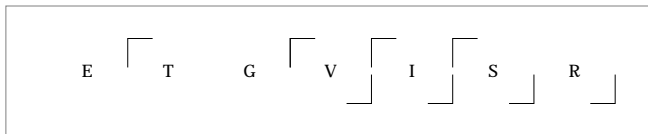

dbValid true VSEISAR PHOS(1) 1. 843. -1.61851 5.18102 100. ? 2550.  
 S\_Acido\_new%gi|68567508|gb|AAY80437.1| VSEISAR%::::PHOS:::sample\_1%compd\_1096

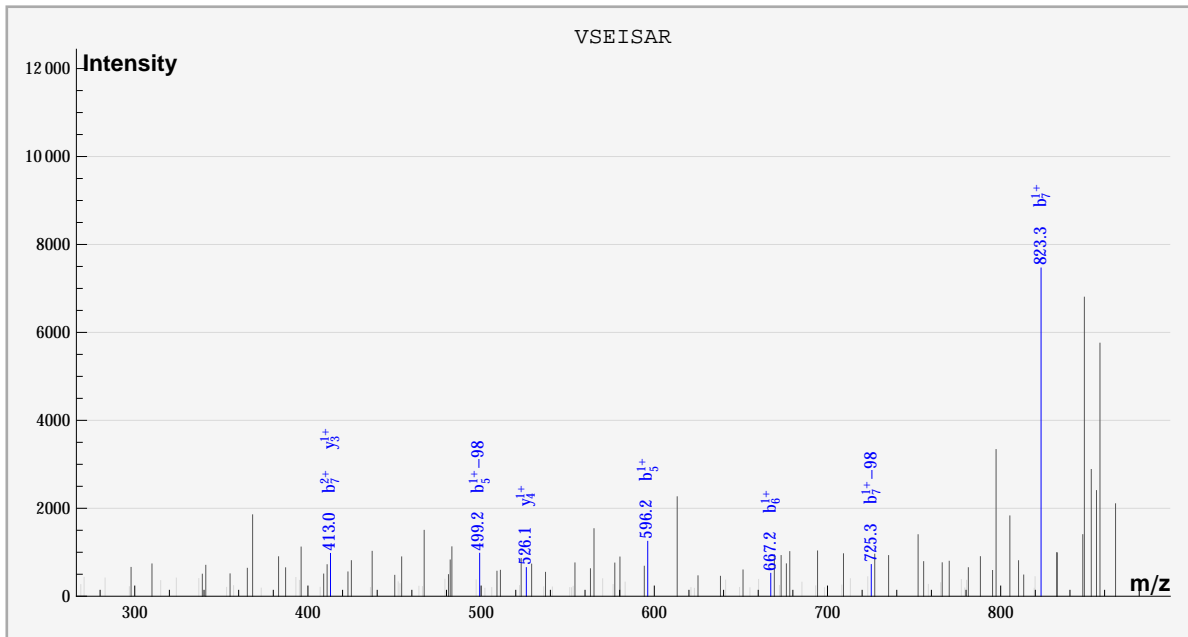

|   | # | b | b* | # | y | y* | P | P* |
|---|---|---|----|---|---|----|---|----|
| V | 1 |   |    |   |   |    |   |    |
| S | 2 |   |    | 6 |   |    |   |    |
| E | 3 |   |    | 5 |   |    |   |    |
| I | 4 |   |    | 4 | ✓ |    |   |    |
| S | 5 | ✓ | ✓  | 3 | ✓ |    |   |    |
| A | 6 | ✓ |    | 2 |   |    |   |    |
| R | 7 | ✓ | ✓  | 1 |   |    |   |    |

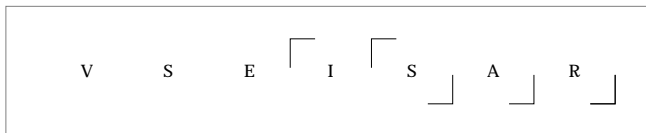

dbValid true AYIGIPK PHOS(1) 1. 843. -1.57811 5.41334 100. ? 2706.  
 S\_Acido\_new%gi|68566583|gb|AAY79512.1| AYIGIPK:::PHOS:::sample\_1%compd\_1229

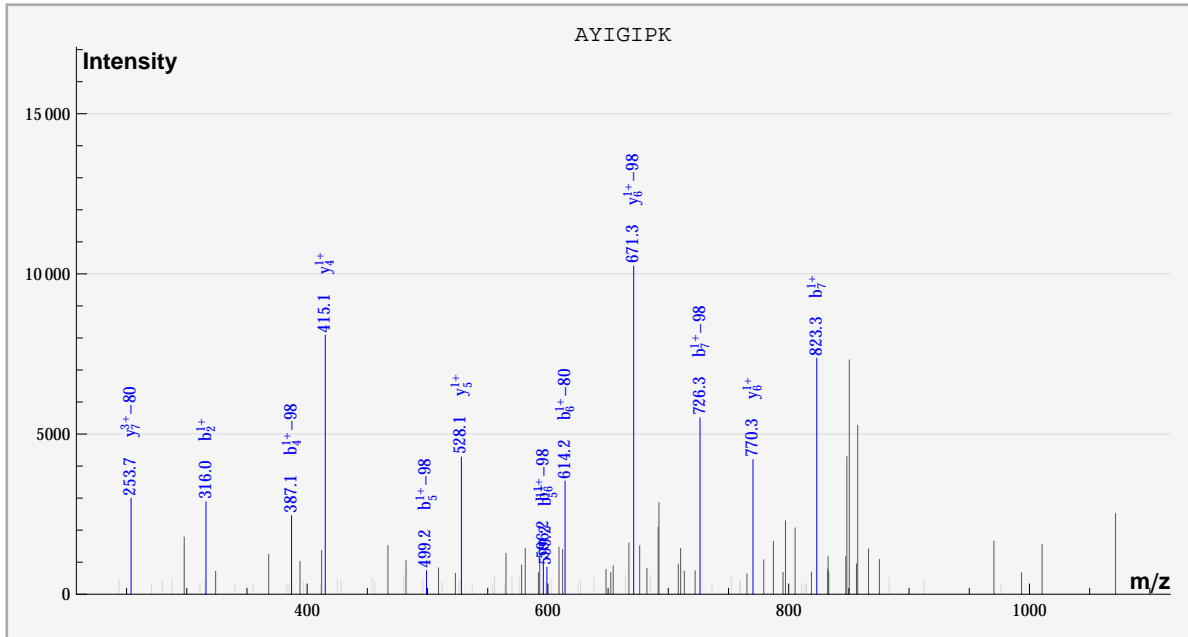

|   | # | b | b* | # | y | y* | P | P* |
|---|---|---|----|---|---|----|---|----|
| A | 1 |   |    |   |   |    |   | ✓  |
| Y | 2 | ✓ |    | 6 | ✓ | ✓  |   |    |
| I | 3 |   |    | 5 | ✓ |    |   |    |
| G | 4 |   | ✓  | 4 | ✓ |    |   |    |
| I | 5 | ✓ | ✓  | 3 |   |    |   |    |
| P | 6 |   | ✓  | 2 |   |    |   |    |
| K | 7 | ✓ | ✓  | 1 |   |    |   |    |

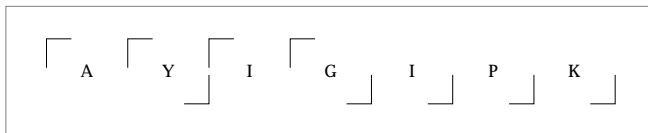

dbValid true AYIGIPK PHOS(1) 1. 843. -1.57811 5.36921 100. ? 2712.

S\_Acido\_new%gi|68566583|gb|AAY79512.1| AYIGIPK%::PHOS:::%sample\_1%compd\_1239

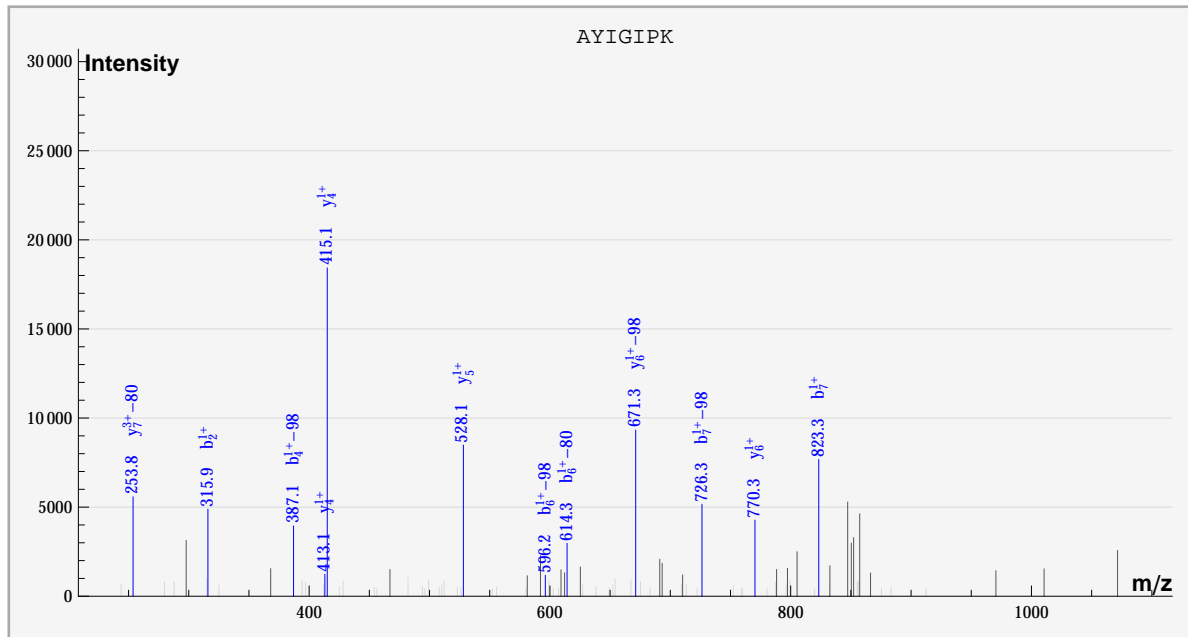

|   | # | b | b* | # | y | y* | P | P* |
|---|---|---|----|---|---|----|---|----|
| A | 1 |   |    |   |   |    |   | ✓  |
| Y | 2 | ✓ |    | 6 | ✓ | ✓  |   |    |
| I | 3 |   |    | 5 | ✓ |    |   |    |
| G | 4 |   | ✓  | 4 | ✓ |    |   |    |
| I | 5 |   |    | 3 |   |    |   |    |
| P | 6 |   | ✓  | 2 |   |    |   |    |
| K | 7 | ✓ | ✓  | 1 |   |    |   |    |

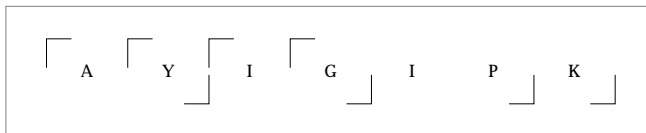

dbValid true AYIGIPK PHOS(1) 1. 843. -1.57811 6.09681 100. ? 2724.

S\_Acido\_new%gi|68566583|gb|AAY79512.1| AYIGIPK%::PHOS:::%sample\_1%compd\_1250

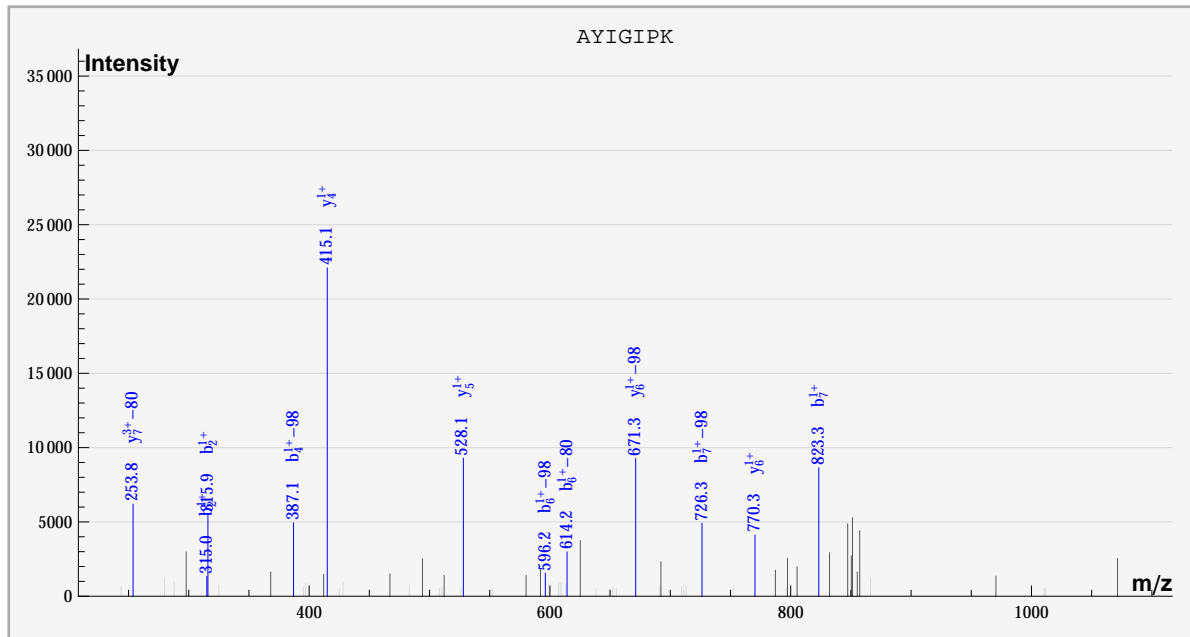

|   | # | b | b* | # | y | y* | P | P* |
|---|---|---|----|---|---|----|---|----|
| A | 1 |   |    |   |   |    |   | ✓  |
| Y | 2 | ✓ |    | 6 | ✓ | ✓  |   |    |
| I | 3 |   |    | 5 | ✓ |    |   |    |
| G | 4 |   | ✓  | 4 | ✓ |    |   |    |
| I | 5 |   |    | 3 |   |    |   |    |
| P | 6 |   | ✓  | 2 |   |    |   |    |
| K | 7 | ✓ | ✓  | 1 |   |    |   |    |

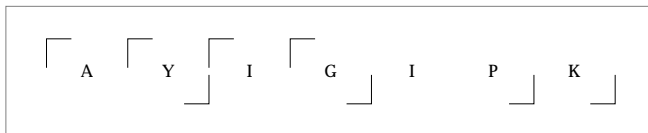

dbValid true AYIGIPK PHOS(1) 1. 843. -1.57811 5.26832 100. ? 2736.

S\_Acido\_new%gi|68566583|gb|AAY79512.1| AYIGIPK%::PHOS:::%sample\_1%compd\_1260

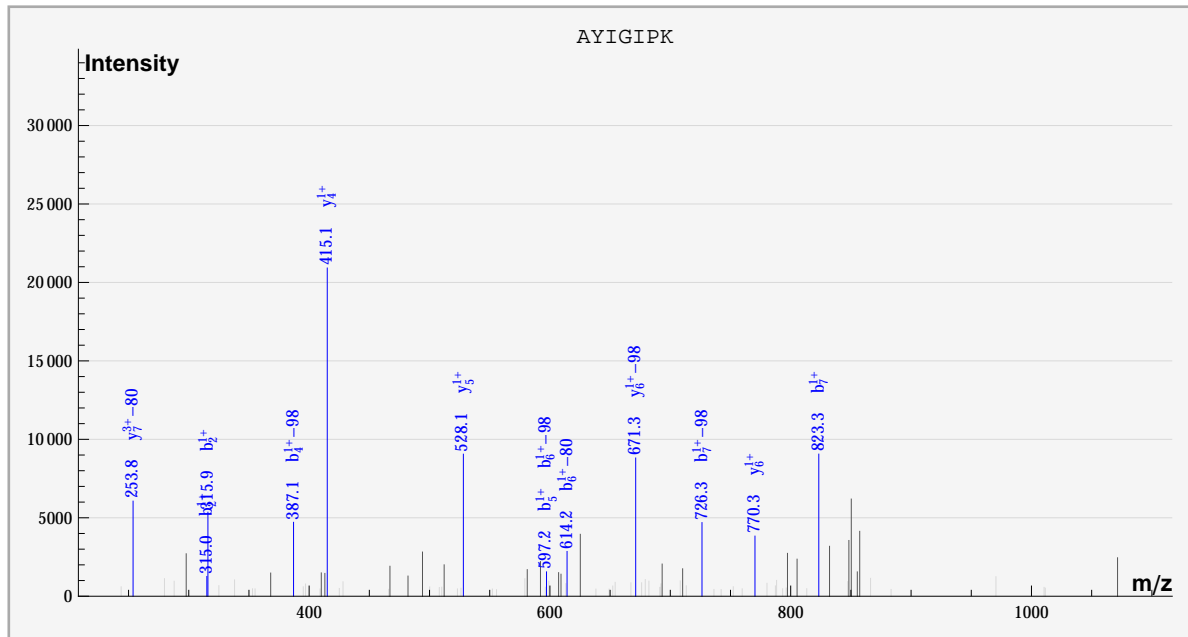

|   | # | b | b* | # | y | y* | P | P* |
|---|---|---|----|---|---|----|---|----|
| A | 1 |   |    |   |   |    |   | ✓  |
| Y | 2 | ✓ |    | 6 | ✓ | ✓  |   |    |
| I | 3 |   |    | 5 | ✓ |    |   |    |
| G | 4 |   | ✓  | 4 | ✓ |    |   |    |
| I | 5 | ✓ |    | 3 |   |    |   |    |
| P | 6 |   | ✓  | 2 |   |    |   |    |
| K | 7 | ✓ | ✓  | 1 |   |    |   |    |

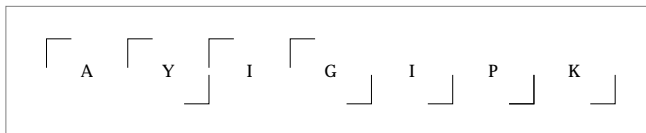

dbValid true LGLSFVPAKPFYLR PHOS(1) 2. 843. 1.45218 5.39557 100. ? 3306.  
 S\_Acido\_new%gi|68567442|gb|AA80371.1| LGLSFVPAKPFYLR%::::PHOS::::::::::%sample\_1%compd\_1744

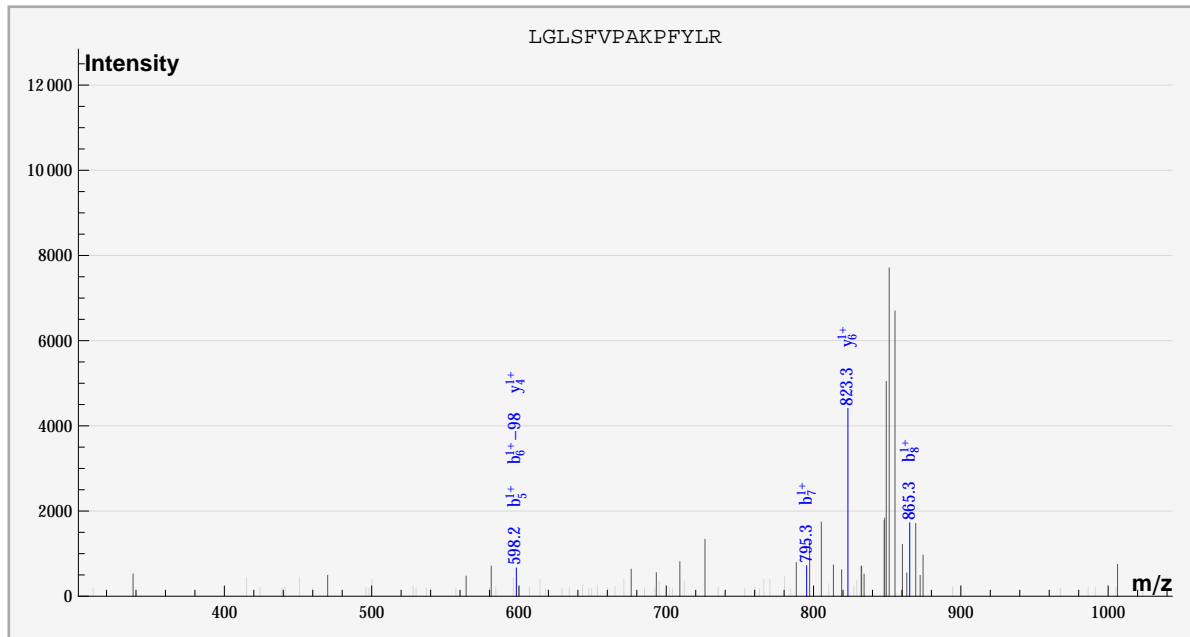

|   | #  | b | b* | #  | y | y* | P | P* |
|---|----|---|----|----|---|----|---|----|
| L | 1  |   |    |    |   |    |   |    |
| G | 2  |   |    | 13 |   |    |   |    |
| L | 3  |   |    | 12 |   |    |   |    |
| S | 4  |   |    | 11 |   |    |   |    |
| F | 5  | ✓ |    | 10 |   |    |   |    |
| V | 6  |   | ✓  | 9  |   |    |   |    |
| P | 7  | ✓ |    | 8  |   |    |   |    |
| A | 8  | ✓ |    | 7  |   |    |   |    |
| K | 9  |   |    | 6  | ✓ |    |   |    |
| P | 10 |   |    | 5  |   |    |   |    |
| F | 11 |   |    | 4  | ✓ |    |   |    |
| Y | 12 |   |    | 3  |   |    |   |    |
| L | 13 |   |    | 2  |   |    |   |    |
| R | 14 |   |    | 1  |   |    |   |    |

L G L S F V P A K P F Y L R



dbValid true KTIYIK PHOS(1) 1. 847. -1.5468 5.64499 100. ? 1422.  
 S\_Acido\_new%gi|68567231|gb|AAY80160.1| KTIYIK%::PHOS:::%sample\_1%cmpd\_158

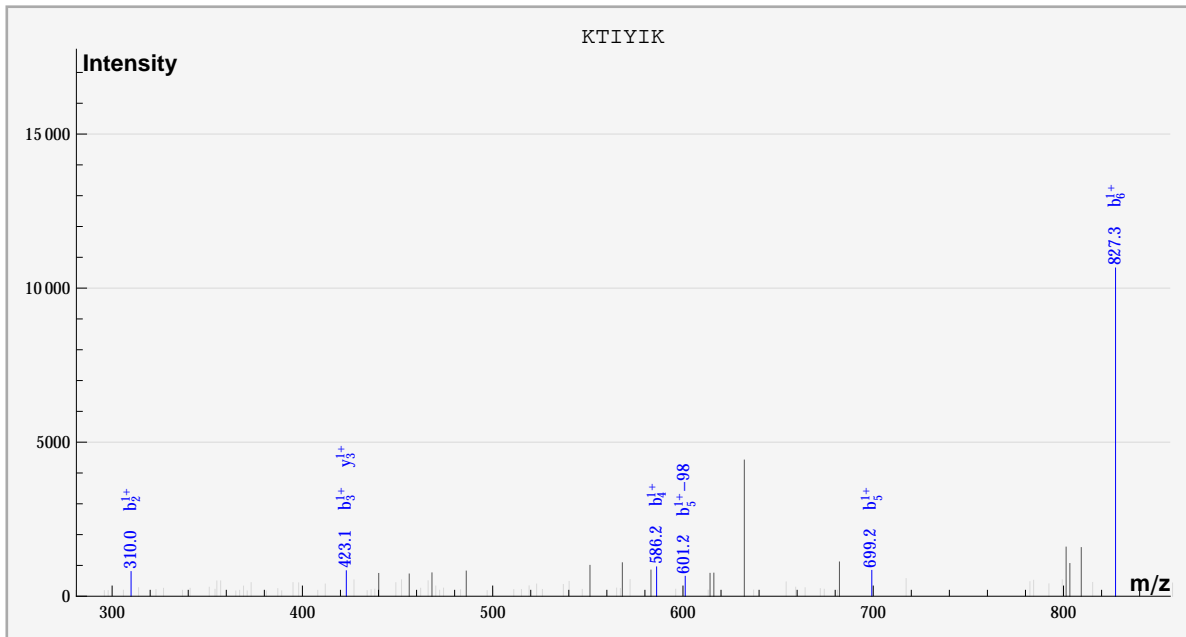

|   | # | b | b* | # | y | y* | P | P* |
|---|---|---|----|---|---|----|---|----|
| K | 1 |   |    |   |   |    |   |    |
| T | 2 | ✓ |    | 5 |   |    |   |    |
| I | 3 | ✓ |    | 4 |   |    |   |    |
| Y | 4 | ✓ |    | 3 | ✓ |    |   |    |
| I | 5 | ✓ | ✓  | 2 |   |    |   |    |
| K | 6 | ✓ |    | 1 |   |    |   |    |

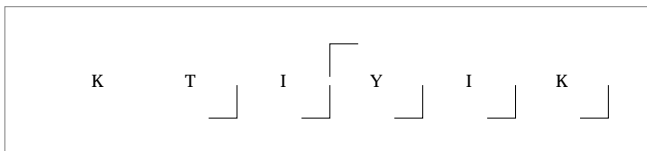

dbValid true EEKNMSLGELSQR Oxidation\_M(1),PHOS(2) 2. 847.1 1.73606 5.18938 100. ? 3696.  
 S\_Acido\_new%gil68567750|gb|AAy80679.1| EEKNMSLGELSQR%:::Oxidation\_M:PHOS:::PHOS:::sample\_3%compd\_2156

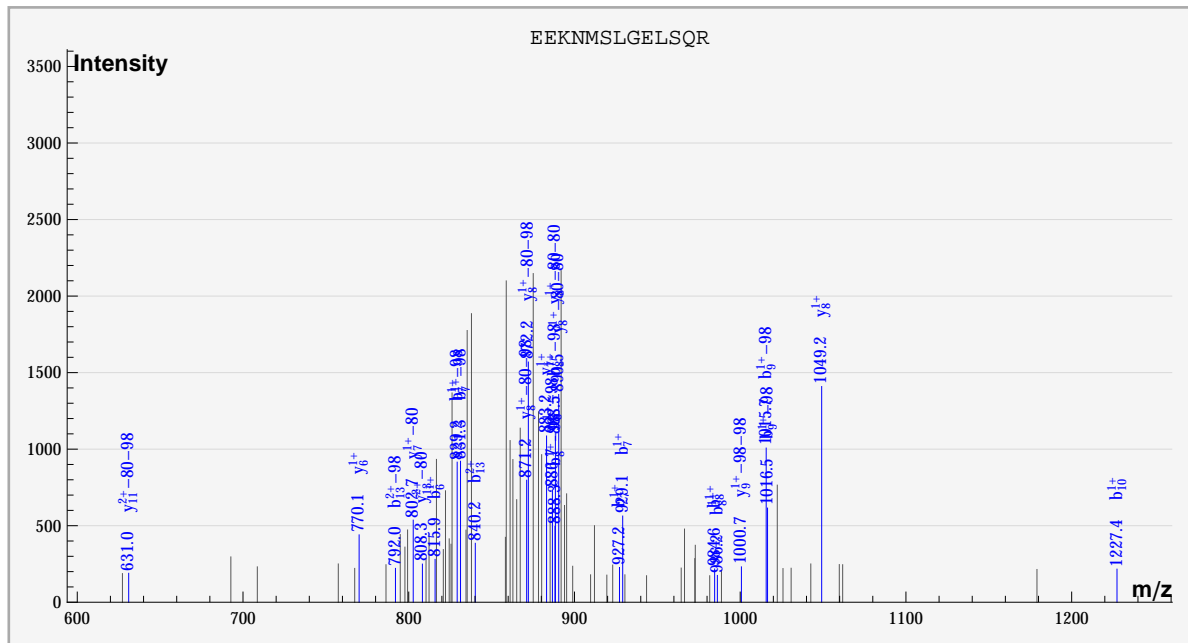

|   | #  | b | b* | #  | y | y* | P | P* |
|---|----|---|----|----|---|----|---|----|
| E | 1  |   |    |    |   |    |   | ✓  |
| E | 2  |   |    | 12 |   |    |   |    |
| K | 3  |   |    | 11 |   | ✓  |   |    |
| N | 4  |   |    | 10 |   |    |   |    |
| M | 5  |   |    | 9  |   | ✓  |   |    |
| S | 6  | ✓ |    | 8  | ✓ | ✓  |   |    |
| L | 7  | ✓ | ✓  | 7  | ✓ | ✓  |   |    |
| G | 8  | ✓ | ✓  | 6  | ✓ |    |   |    |
| E | 9  |   | ✓  | 5  |   |    |   |    |
| L | 10 | ✓ |    | 4  |   |    |   |    |
| S | 11 |   |    | 3  |   |    |   |    |
| Q | 12 |   |    | 2  |   |    |   |    |
| R | 13 | ✓ | ✓  | 1  |   |    |   |    |

[ E E [ K N [ M [ S ] L ] G ] E ] L ] S Q R ]

dbValid true RSASSIAKELQVSR PHOS(2) 2. 848. -1.60252 5.35514 100. ? 1560.

S\_Acido\_new%gi|68567311|gb|AA80240.1| RSASSIAKELQVSR%:::::PHOS:::::PHOS::%sample\_1%compd\_263

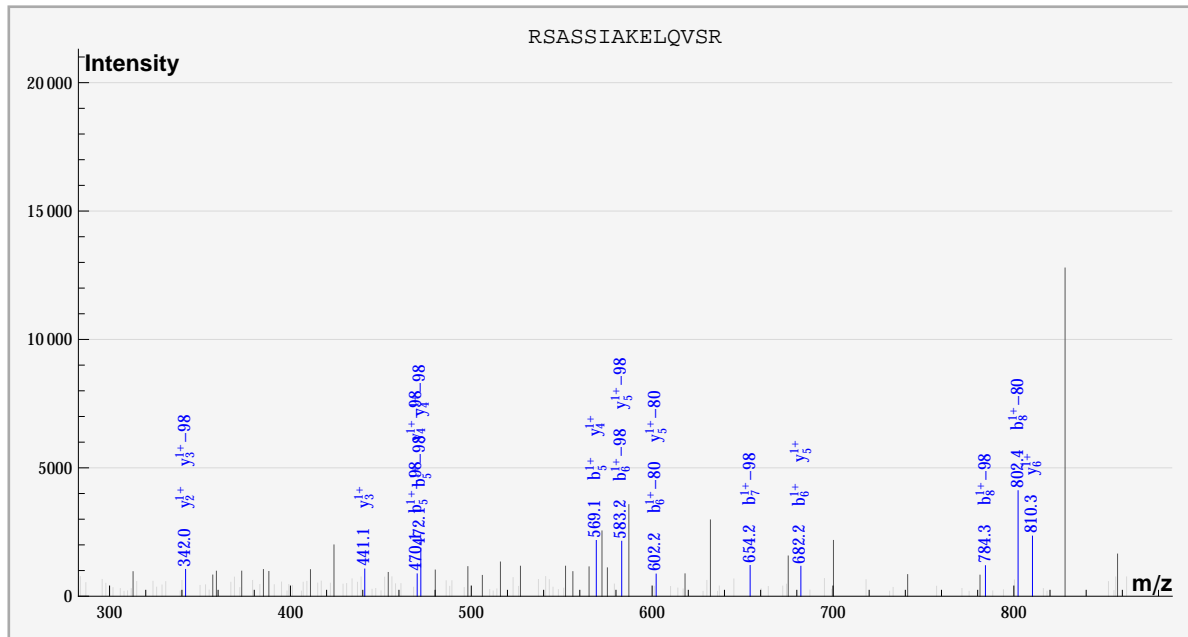

|   | #  | b | b* | #  | y | y* | P | P* |
|---|----|---|----|----|---|----|---|----|
| R | 1  |   |    |    |   |    |   |    |
| S | 2  |   |    | 13 |   |    |   |    |
| A | 3  |   |    | 12 |   |    |   |    |
| S | 4  |   |    | 11 |   |    |   |    |
| S | 5  | ✓ | ✓  | 10 |   |    |   |    |
| I | 6  | ✓ | ✓  | 9  |   |    |   |    |
| A | 7  |   | ✓  | 8  |   |    |   |    |
| K | 8  |   | ✓  | 7  |   |    |   |    |
| E | 9  |   |    | 6  | ✓ |    |   |    |
| L | 10 |   |    | 5  | ✓ | ✓  |   |    |
| Q | 11 |   |    | 4  | ✓ | ✓  |   |    |
| V | 12 |   |    | 3  | ✓ | ✓  |   |    |
| S | 13 |   |    | 2  | ✓ |    |   |    |
| R | 14 |   |    | 1  |   |    |   |    |

R S A S S I A K E L Q V S R

dbValid true RSASSIAKELQVSR PHOS(2) 2. 848. -1.60252 5.13319 100. ? 1812.

S\_Acido\_new%gi|68567311|gb|AAY80240.1| RSASSIAKELQVSR%::::PHOS:::::PHOS::%sample\_1%cmpd\_475

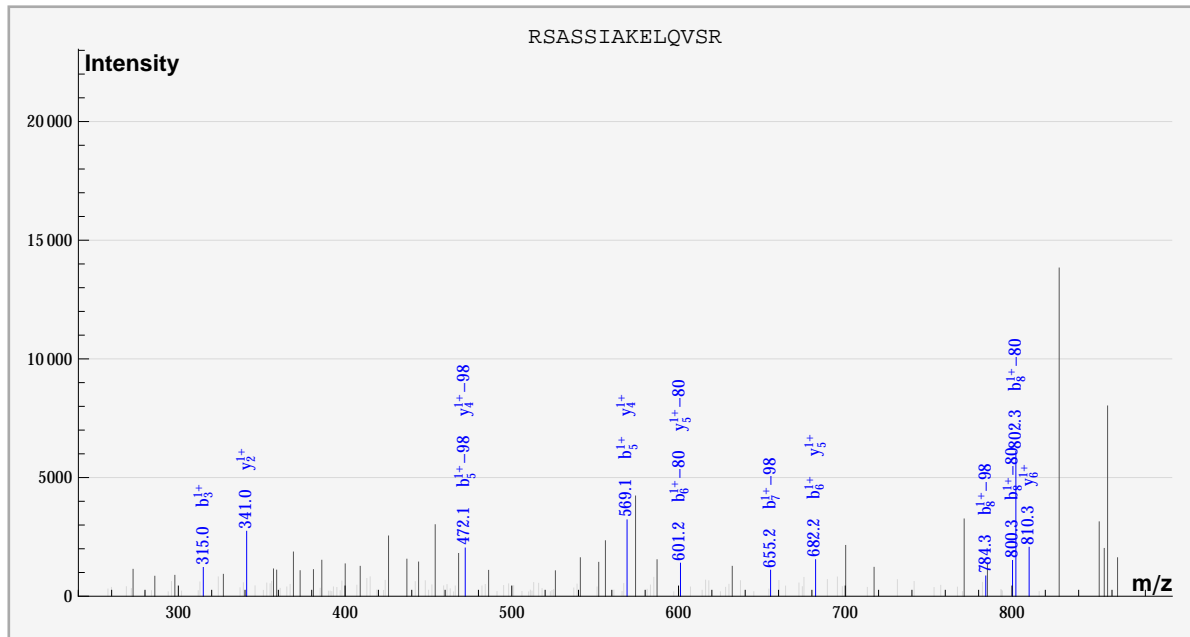

|   | #  | b | b* | #  | y | y* | P | P* |
|---|----|---|----|----|---|----|---|----|
| R | 1  |   |    |    |   |    |   |    |
| S | 2  |   |    | 13 |   |    |   |    |
| A | 3  | ✓ |    | 12 |   |    |   |    |
| S | 4  |   |    | 11 |   |    |   |    |
| S | 5  | ✓ | ✓  | 10 |   |    |   |    |
| I | 6  | ✓ | ✓  | 9  |   |    |   |    |
| A | 7  |   | ✓  | 8  |   |    |   |    |
| K | 8  |   | ✓  | 7  |   |    |   |    |
| E | 9  |   |    | 6  | ✓ |    |   |    |
| L | 10 |   |    | 5  | ✓ | ✓  |   |    |
| Q | 11 |   |    | 4  | ✓ | ✓  |   |    |
| V | 12 |   |    | 3  |   |    |   |    |
| S | 13 |   |    | 2  | ✓ |    |   |    |
| R | 14 |   |    | 1  |   |    |   |    |

R S A S S I A K E L Q V S R

dbValid true RSASSIAKELQVSR PHOS(2) 2. 848. -1.60252 5.09591 100. ? 2550.

S\_Acido\_new%gi|68567311|gb|AA80240.1| RSASSIAKELQVSR%:::PHOS:::PHOS::%sample\_1%compd\_1101

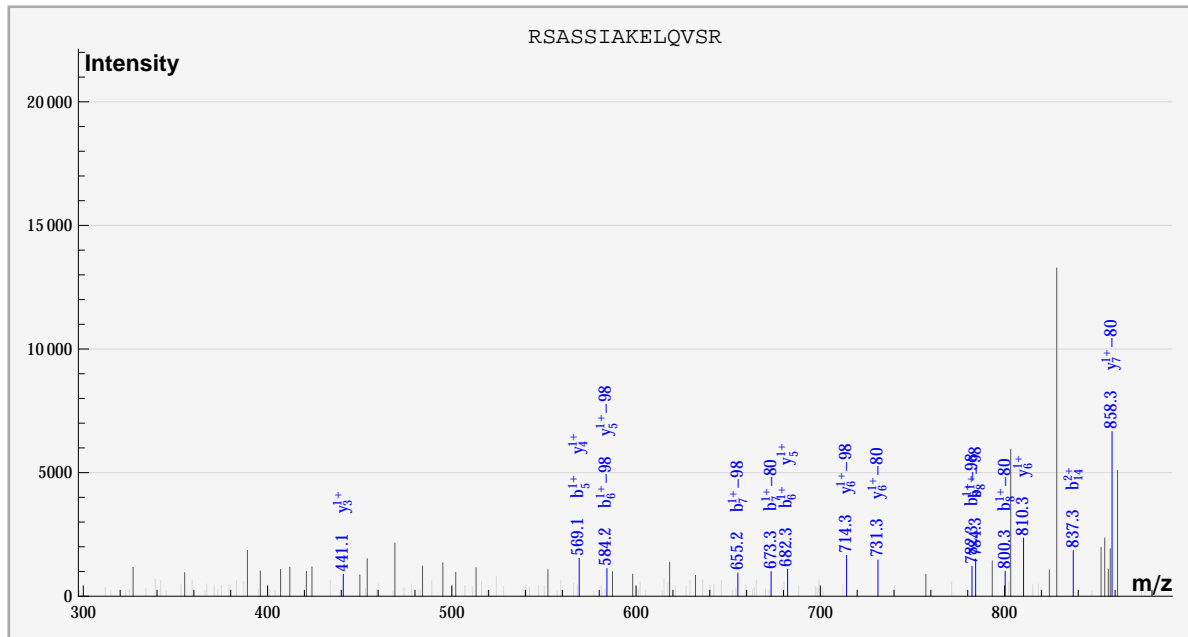

|   | #  | b | b* | #  | y | y* | P | P* |
|---|----|---|----|----|---|----|---|----|
| R | 1  |   |    |    |   |    |   |    |
| S | 2  |   |    | 13 |   |    |   |    |
| A | 3  |   |    | 12 |   |    |   |    |
| S | 4  |   |    | 11 |   |    |   |    |
| S | 5  | ✓ |    | 10 |   |    |   |    |
| I | 6  | ✓ | ✓  | 9  |   |    |   |    |
| A | 7  |   | ✓  | 8  |   |    |   |    |
| K | 8  |   | ✓  | 7  |   | ✓  |   |    |
| E | 9  |   |    | 6  | ✓ | ✓  |   |    |
| L | 10 |   |    | 5  | ✓ | ✓  |   |    |
| Q | 11 |   |    | 4  | ✓ |    |   |    |
| V | 12 |   |    | 3  | ✓ |    |   |    |
| S | 13 |   |    | 2  |   |    |   |    |
| R | 14 | ✓ |    | 1  |   |    |   |    |

R S A S S I A K E L Q V S R

dbValid true RSASSIAKELQVSR PHOS(2) 2. 848. -1.60252 5.60696 100. ? 2634.  
 S\_Acido\_new%gi|68567311|gb|AAy80240.1| RSASSIAKELQVSR%:::::PHOS:::::PHOS::%sample\_1%compd\_1173

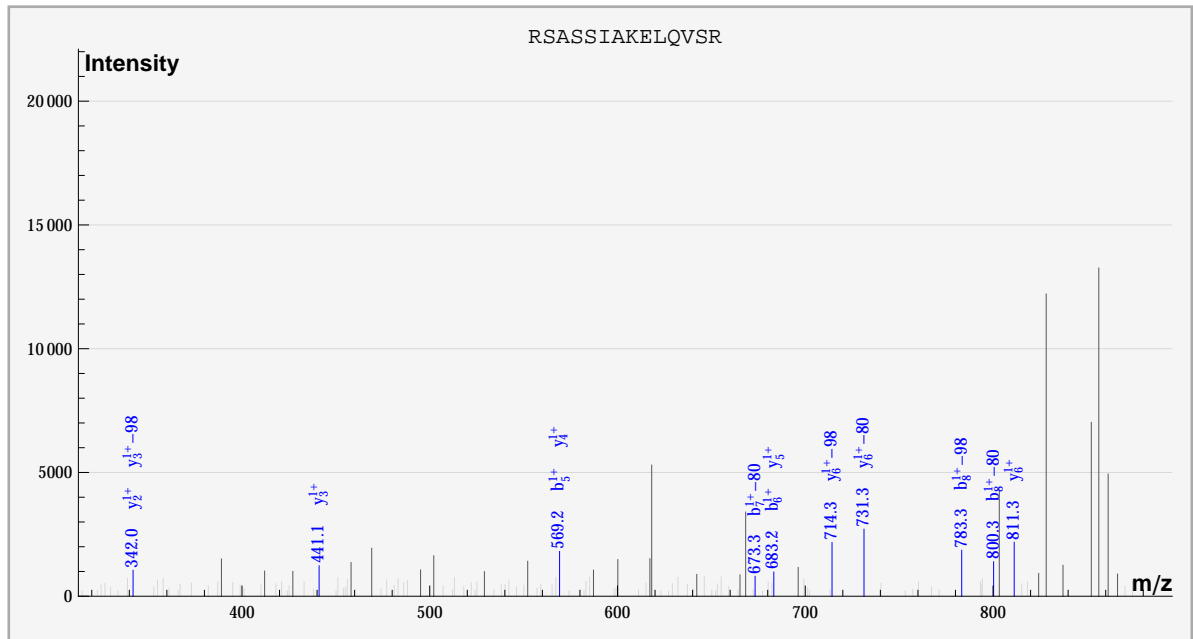

|   | #  | b | b* | #  | y | y* | P | P* |
|---|----|---|----|----|---|----|---|----|
| R | 1  |   |    |    |   |    |   |    |
| S | 2  |   |    | 13 |   |    |   |    |
| A | 3  |   |    | 12 |   |    |   |    |
| S | 4  |   |    | 11 |   |    |   |    |
| S | 5  | ✓ |    | 10 |   |    |   |    |
| I | 6  | ✓ |    | 9  |   |    |   |    |
| A | 7  |   | ✓  | 8  |   |    |   |    |
| K | 8  |   | ✓  | 7  |   |    |   |    |
| E | 9  |   |    | 6  | ✓ | ✓  |   |    |
| L | 10 |   |    | 5  | ✓ |    |   |    |
| Q | 11 |   |    | 4  | ✓ |    |   |    |
| V | 12 |   |    | 3  | ✓ | ✓  |   |    |
| S | 13 |   |    | 2  | ✓ |    |   |    |
| R | 14 |   |    | 1  |   |    |   |    |

R S A S S I A K E L Q V S R

dbValid true RSASSIAKELQVSR PHOS(2) 2. 848. -1.60252 5.16135 100. ? 2646.  
 S\_Acido\_new%gi|68567311|gb|AA80240.1| RSASSIAKELQVSR%:::::PHOS:::::PHOS::%sample\_1%compd\_1184

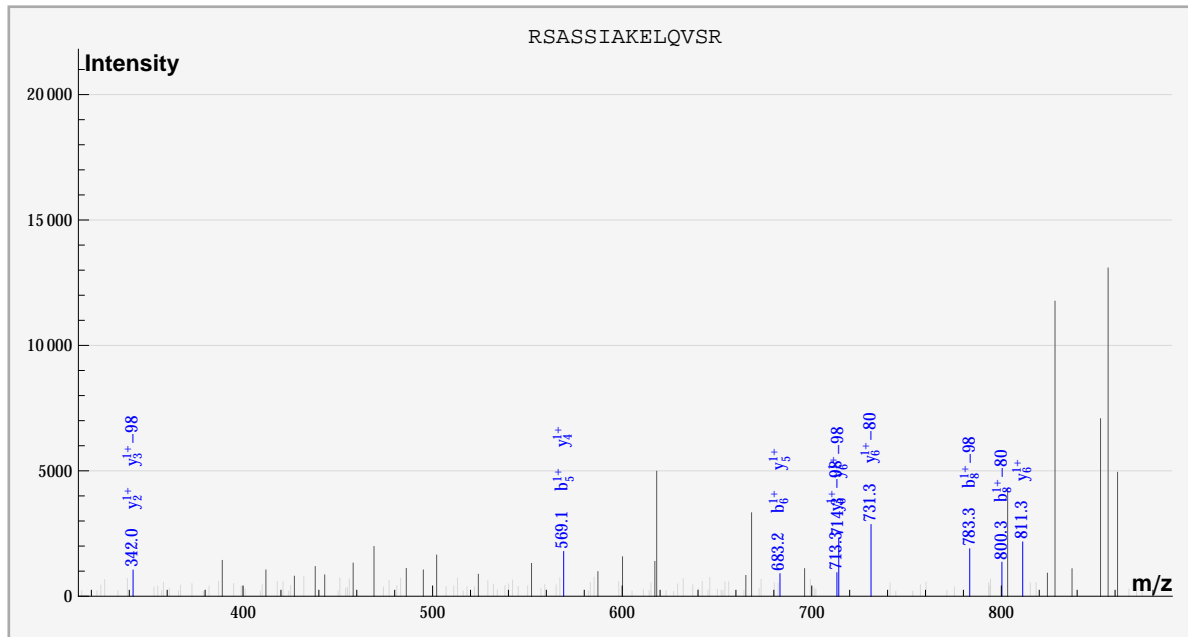

|   | #  | b | b* | #  | y | y* | P | P* |
|---|----|---|----|----|---|----|---|----|
| R | 1  |   |    |    |   |    |   |    |
| S | 2  |   |    | 13 |   |    |   |    |
| A | 3  |   |    | 12 |   |    |   |    |
| S | 4  |   |    | 11 |   |    |   |    |
| S | 5  | ✓ |    | 10 |   |    |   |    |
| I | 6  | ✓ |    | 9  |   |    |   |    |
| A | 7  |   |    | 8  |   |    |   |    |
| K | 8  |   | ✓  | 7  |   |    |   |    |
| E | 9  |   |    | 6  | ✓ | ✓  |   |    |
| L | 10 |   |    | 5  | ✓ |    |   |    |
| Q | 11 |   |    | 4  | ✓ |    |   |    |
| V | 12 |   |    | 3  |   | ✓  |   |    |
| S | 13 |   |    | 2  | ✓ |    |   |    |
| R | 14 |   |    | 1  |   |    |   |    |

R S A S S I A K E L Q V S R

dbValid true LINKYTNTYVTRK PHOS(1) 2. 849.4 -1.96272 5.44043 100. ? 1506.  
 S\_Acido\_new%gi|68566706|gb|AAAY79635.1| LINKYTNTYVTRK%:::PHOS:::sample\_1%cmpd\_236

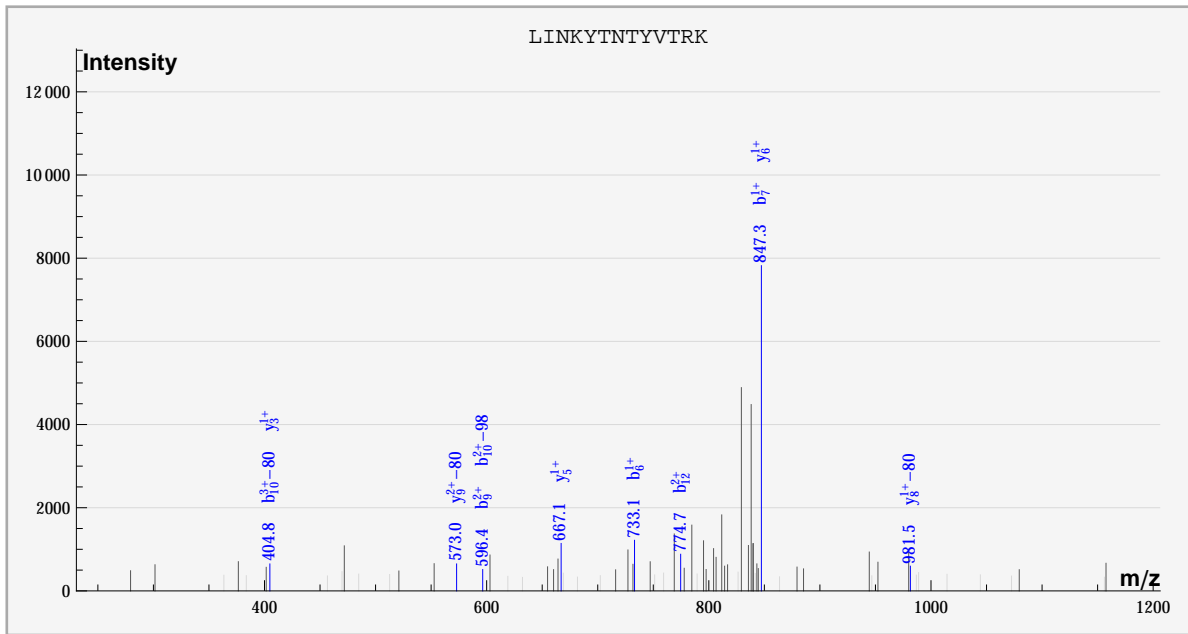

|   | #  | b | b* | #  | y | y* | P | P* |
|---|----|---|----|----|---|----|---|----|
| L | 1  |   |    |    |   |    |   |    |
| I | 2  |   |    | 12 |   |    |   |    |
| N | 3  |   |    | 11 |   |    |   |    |
| K | 4  |   |    | 10 |   |    |   |    |
| Y | 5  |   |    | 9  |   | ✓  |   |    |
| T | 6  | ✓ |    | 8  |   | ✓  |   |    |
| N | 7  | ✓ |    | 7  |   |    |   |    |
| T | 8  |   |    | 6  | ✓ |    |   |    |
| Y | 9  | ✓ |    | 5  | ✓ |    |   |    |
| V | 10 |   | ✓  | 4  |   |    |   |    |
| T | 11 |   |    | 3  | ✓ |    |   |    |
| R | 12 | ✓ |    | 2  |   |    |   |    |
| K | 13 |   |    | 1  |   |    |   |    |

L I N K [Y [T] N] T [Y] V] T R] K



dbValid true VYEAHWHEKYKAL PHOS(2) 2. 850. -1.1378 5.2163 100. ? 2976.

S\_Acido\_new%gi|68567777|gb|AAAY80706.1| VYEAHWHEKYKAL%::PHOS:::PHOS:::sample\_2%compd\_1574

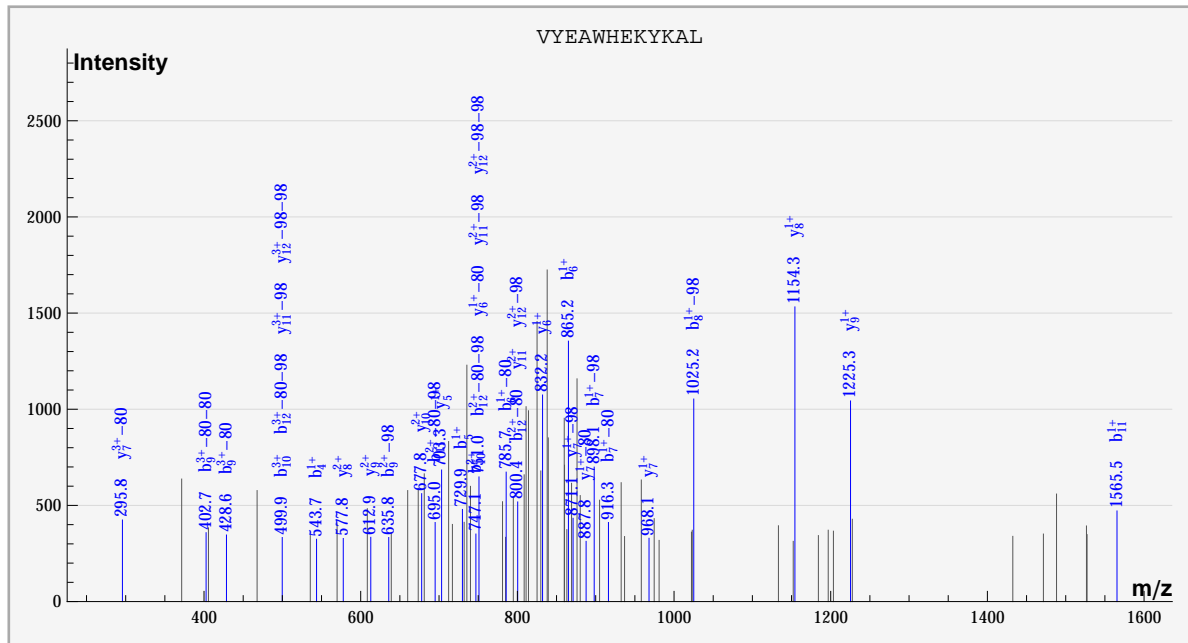

|   | #  | b | b* | #  | y | y* | P | P* |
|---|----|---|----|----|---|----|---|----|
| V | 1  |   |    |    |   |    |   | ✓  |
| Y | 2  |   |    | 11 | ✓ | ✓  |   |    |
| E | 3  |   |    | 10 | ✓ |    |   |    |
| A | 4  | ✓ |    | 9  | ✓ |    |   |    |
| W | 5  | ✓ |    | 8  | ✓ |    |   |    |
| H | 6  | ✓ | ✓  | 7  | ✓ | ✓  |   |    |
| E | 7  |   | ✓  | 6  | ✓ | ✓  |   |    |
| K | 8  |   | ✓  | 5  | ✓ |    |   |    |
| Y | 9  |   | ✓  | 4  |   |    |   |    |
| K | 10 | ✓ |    | 3  |   |    |   |    |
| A | 11 | ✓ | ✓  | 2  |   |    |   |    |
| L | 12 |   | ✓  | 1  |   |    |   |    |

V Y E A W H E K Y K A L

dbValid true MSVEFNLTNLQVK Oxidation\_M(1),PHOS(2) 2. 850. -0.135913 5.09724 100. ? 3078.  
 S\_Acido\_new%gil68566963|gb|AA79892.1| MSVEFNLTNLQVK%:Oxidation\_M:PHOS:::PHOS:::sample\_3%compd\_1490

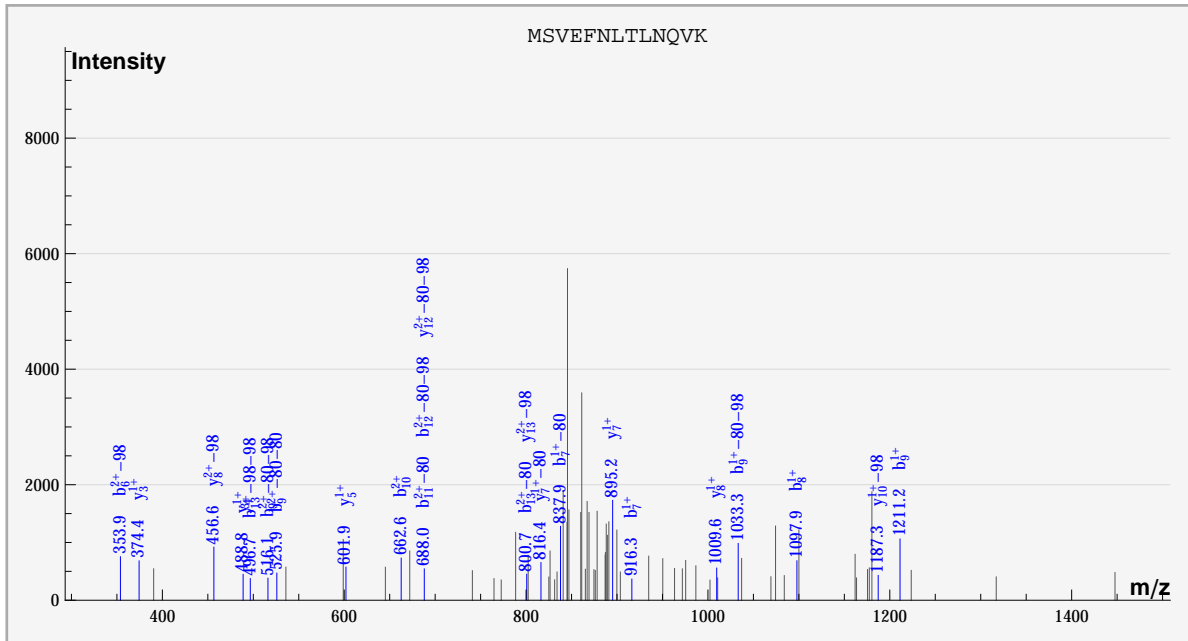

|   | #  | b | b* | #  | y | y* | P | P* |
|---|----|---|----|----|---|----|---|----|
| M | 1  |   |    |    |   |    |   | ✓  |
| S | 2  |   |    | 12 |   | ✓  |   |    |
| V | 3  |   |    | 11 |   |    |   |    |
| E | 4  |   |    | 10 |   | ✓  |   |    |
| F | 5  |   |    | 9  |   |    |   |    |
| N | 6  | ✓ | ✓  | 8  | ✓ | ✓  |   |    |
| L | 7  | ✓ | ✓  | 7  | ✓ | ✓  |   |    |
| T | 8  | ✓ |    | 6  |   |    |   |    |
| L | 9  | ✓ | ✓  | 5  | ✓ |    |   |    |
| N | 10 | ✓ |    | 4  | ✓ |    |   |    |
| Q | 11 | ✓ |    | 3  | ✓ |    |   |    |
| V | 12 | ✓ |    | 2  |   |    |   |    |
| K | 13 | ✓ |    | 1  |   |    |   |    |

[ M ] [ S ] [ V ] [ E ] [ F ] [ N ] [ L ] [ T ] [ L ] [ N ] [ Q ] [ V ] [ K ]

dbValid true LETNHR PHOS(1) 1. 851. -1.63857 5.05764 100. ? 2064.  
 S\_Acido\_new%gi|68567579|gb|AAY80508.1| LETNHR%:::PHOS:::%sample\_2%compd\_743

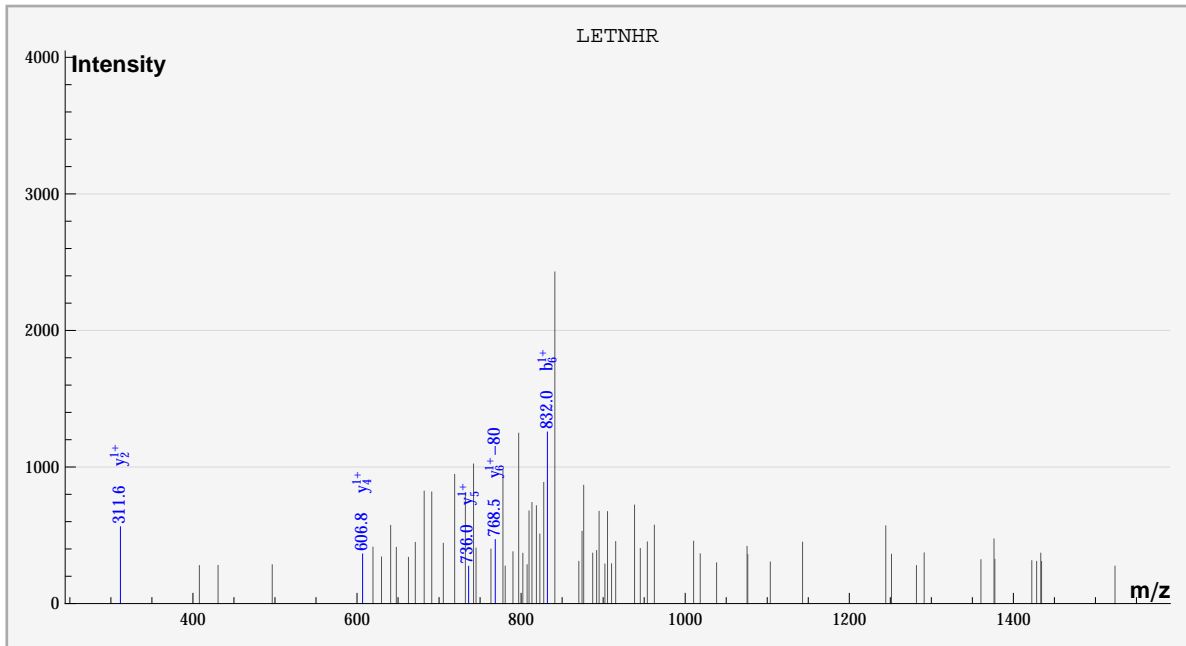

|   | # | b | b* | # | y | y* | P | P* |
|---|---|---|----|---|---|----|---|----|
| L | 1 |   |    |   |   |    |   | ✓  |
| E | 2 |   |    | 5 | ✓ |    |   |    |
| T | 3 |   |    | 4 | ✓ |    |   |    |
| N | 4 |   |    | 3 |   |    |   |    |
| H | 5 |   |    | 2 | ✓ |    |   |    |
| R | 6 | ✓ |    | 1 |   |    |   |    |

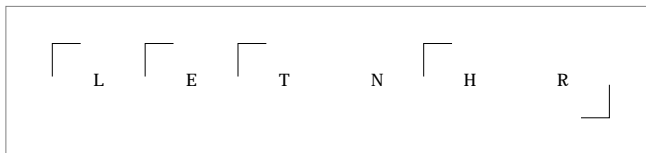

dbValid true HLSLFR PHOS(1) 1. 851. 1.41274 5.72885 100. ? 2550.  
 S\_Acido\_new%gi|68568059|gb|AAY80988.1| HLSLFR%:::PHOS:::%sample\_2%cmpd\_1187

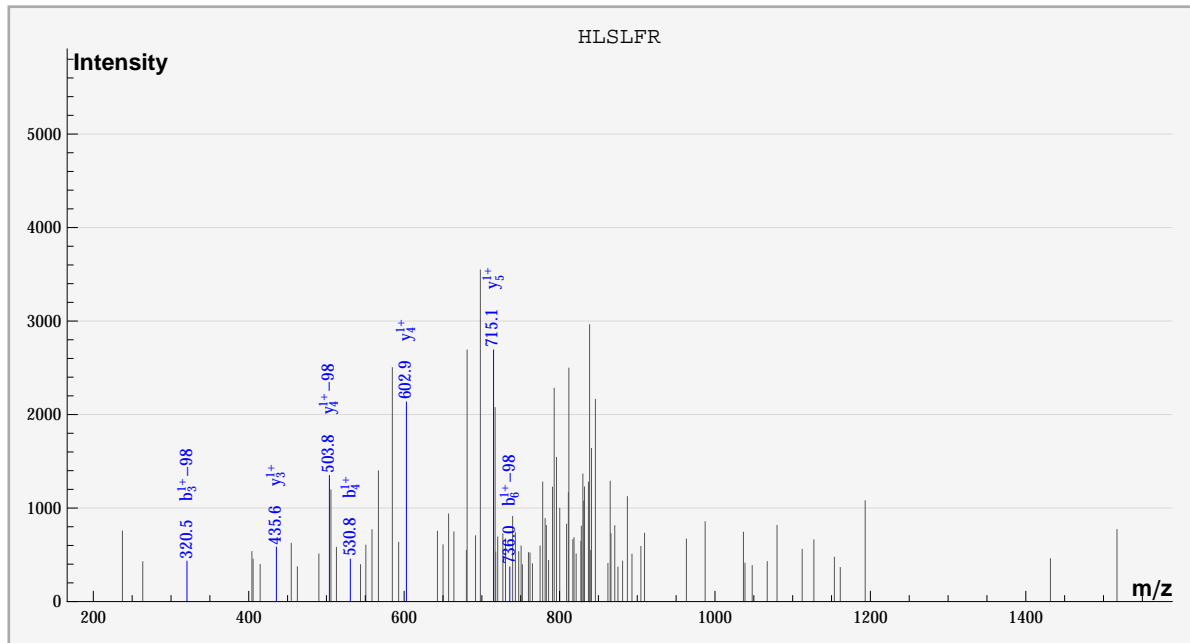

|   | # | b | b* | # | y | y* | P | P* |
|---|---|---|----|---|---|----|---|----|
| H | 1 |   |    |   |   |    |   |    |
| L | 2 |   |    | 5 | ✓ |    |   |    |
| S | 3 | ✓ |    | 4 | ✓ | ✓  |   |    |
| L | 4 | ✓ |    | 3 | ✓ |    |   |    |
| F | 5 |   |    | 2 |   |    |   |    |
| R | 6 | ✓ |    | 1 |   |    |   |    |

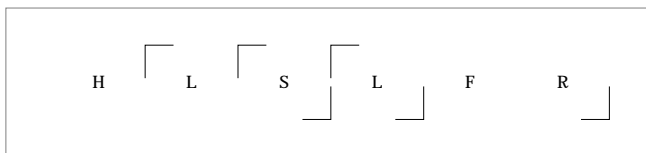

dbValid true YRPMNLSIDLK PHOS(1) 2. 851. -1.05833 5.2468 100. ? 2808.  
 S\_Acido\_new%gi|68567097|gb|AA80026.1| YRPMNLSIDLK%:PHOS:::sample\_2%compd\_1421

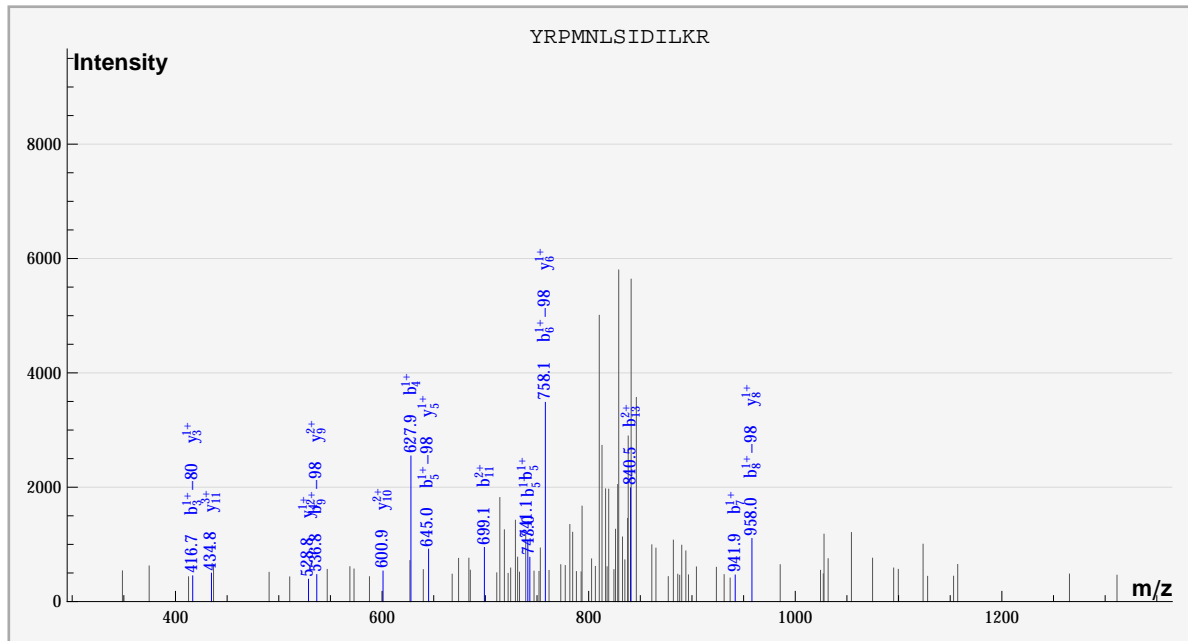

|   | #  | b | b* | #  | y | y* | P | P* |
|---|----|---|----|----|---|----|---|----|
| Y | 1  |   |    |    |   |    |   |    |
| R | 2  |   |    | 12 |   |    |   |    |
| P | 3  |   | ✓  | 11 | ✓ |    |   |    |
| M | 4  | ✓ |    | 10 | ✓ |    |   |    |
| N | 5  | ✓ | ✓  | 9  | ✓ |    |   |    |
| L | 6  |   | ✓  | 8  | ✓ |    |   |    |
| S | 7  | ✓ |    | 7  |   |    |   |    |
| I | 8  |   | ✓  | 6  | ✓ |    |   |    |
| D | 9  |   | ✓  | 5  | ✓ |    |   |    |
| I | 10 |   |    | 4  | ✓ |    |   |    |
| L | 11 | ✓ |    | 3  | ✓ |    |   |    |
| K | 12 |   |    | 2  |   |    |   |    |
| R | 13 | ✓ |    | 1  |   |    |   |    |

Y R P M N L S I D I L K R

dbValid true ELEKYMLFTYK PHOS(3) 2. 851. 1.82525 5.04708 100. ? 3066.

S\_Acido\_new%gi|68568537|gb|AAy81466.1| ELEKYMLFTYK%:::PHOS:::PHOS:PHOS::%sample\_2%compd\_1540

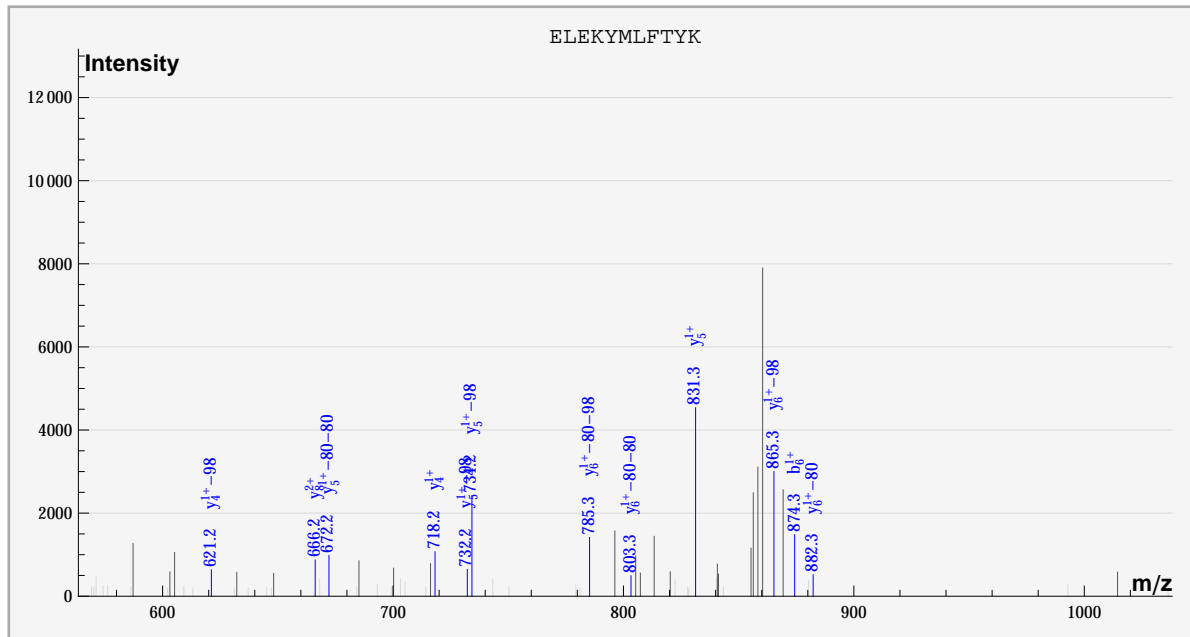

|   | #  | b | b* | #  | y | y* | P | P* |
|---|----|---|----|----|---|----|---|----|
| E | 1  |   |    |    |   |    |   |    |
| L | 2  |   |    | 10 |   |    |   |    |
| E | 3  |   |    | 9  |   |    |   |    |
| K | 4  |   |    | 8  | ✓ |    |   |    |
| Y | 5  |   |    | 7  |   |    |   |    |
| M | 6  | ✓ |    | 6  |   | ✓  |   |    |
| L | 7  |   |    | 5  | ✓ | ✓  |   |    |
| F | 8  |   |    | 4  | ✓ | ✓  |   |    |
| T | 9  |   |    | 3  |   |    |   |    |
| Y | 10 |   |    | 2  |   |    |   |    |
| K | 11 |   |    | 1  |   |    |   |    |

E L E [ K Y [ M ] L [ F T Y K

dbValid true YGKQIGVDEWGLQK PHOS(1) 2. 852. -1.0942 5.07411 100. ? 1956.  
 S\_Acido\_new%gi|68568213|gb|AAY81142.1| YGKQIGVDEWGLQK%:PHOS:::sample\_2%compd\_645

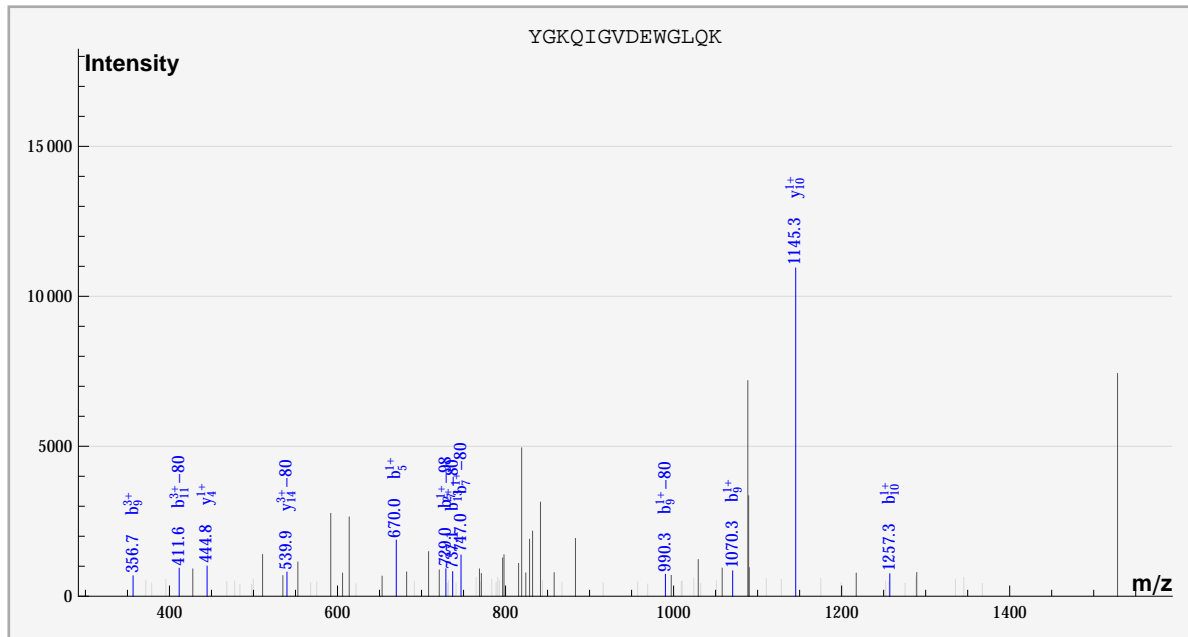

|   | #  | b | b* | #  | y | y* | P | P* |
|---|----|---|----|----|---|----|---|----|
| Y | 1  |   |    |    |   |    |   | ✓  |
| G | 2  |   |    | 13 |   |    |   |    |
| K | 3  |   |    | 12 |   |    |   |    |
| Q | 4  |   |    | 11 |   |    |   |    |
| I | 5  | ✓ |    | 10 | ✓ |    |   |    |
| G | 6  |   | ✓  | 9  |   |    |   |    |
| V | 7  |   | ✓  | 8  |   |    |   |    |
| D | 8  |   |    | 7  |   |    |   |    |
| E | 9  | ✓ | ✓  | 6  |   |    |   |    |
| W | 10 | ✓ |    | 5  |   |    |   |    |
| G | 11 |   | ✓  | 4  | ✓ |    |   |    |
| L | 12 |   |    | 3  |   |    |   |    |
| Q | 13 |   | ✓  | 2  |   |    |   |    |
| K | 14 |   |    | 1  |   |    |   |    |

Y G K Q I G V D E W G L Q K

dbValid true TPVIVNK PHOS(1) 1. 852. -1.55664 5.10288 100. ? 2334.

S\_Acido\_new%gi|68568575|gb|AAY81504.1| TPVIVNK%:PHOS:::sample\_2%compd\_989

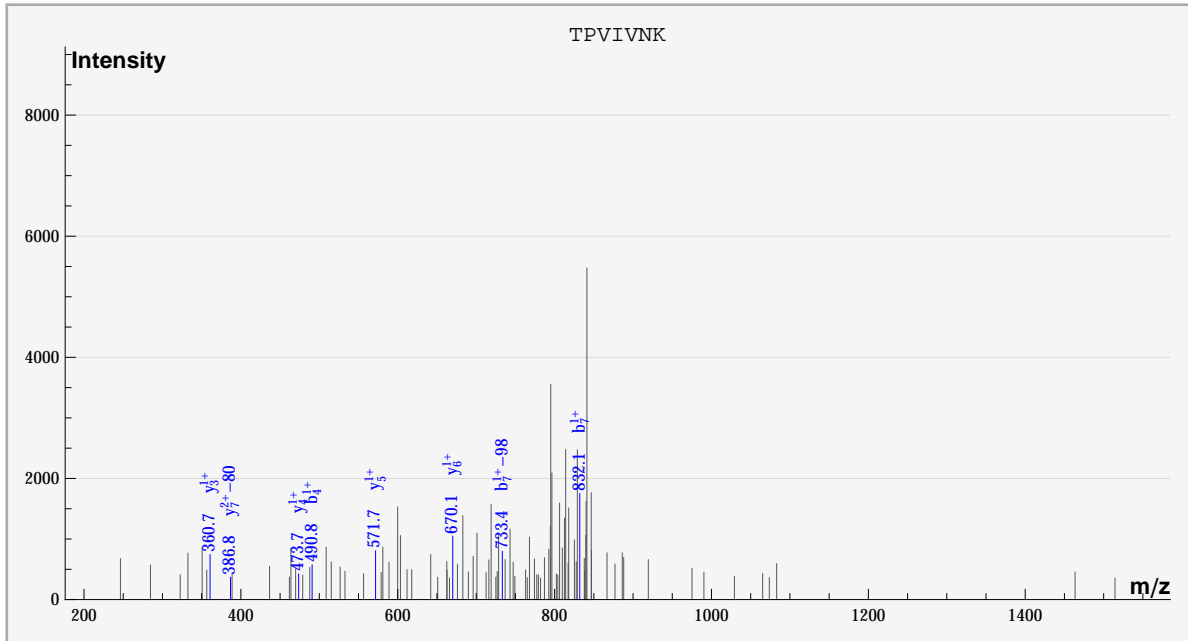

|   | # | b | b* | # | y | y* | P | P* |
|---|---|---|----|---|---|----|---|----|
| T | 1 |   |    |   |   |    |   | ✓  |
| P | 2 |   |    | 6 | ✓ |    |   |    |
| V | 3 |   |    | 5 | ✓ |    |   |    |
| I | 4 | ✓ |    | 4 | ✓ |    |   |    |
| V | 5 |   |    | 3 | ✓ |    |   |    |
| N | 6 |   |    | 2 |   |    |   |    |
| K | 7 | ✓ | ✓  | 1 |   |    |   |    |

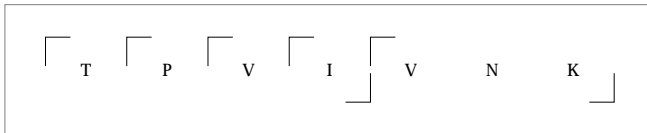



dbValid true YPSVISELGVAVVK PHOS(3) 2. 852. -1.12897 5.21219 100. ? 2346.  
 S\_Acido\_new%gi|68568035|gb|AAV80964.1| YPSVISELGVAVVK%:PHOS::PHOS::PHOS:::sample\_2%compd\_930

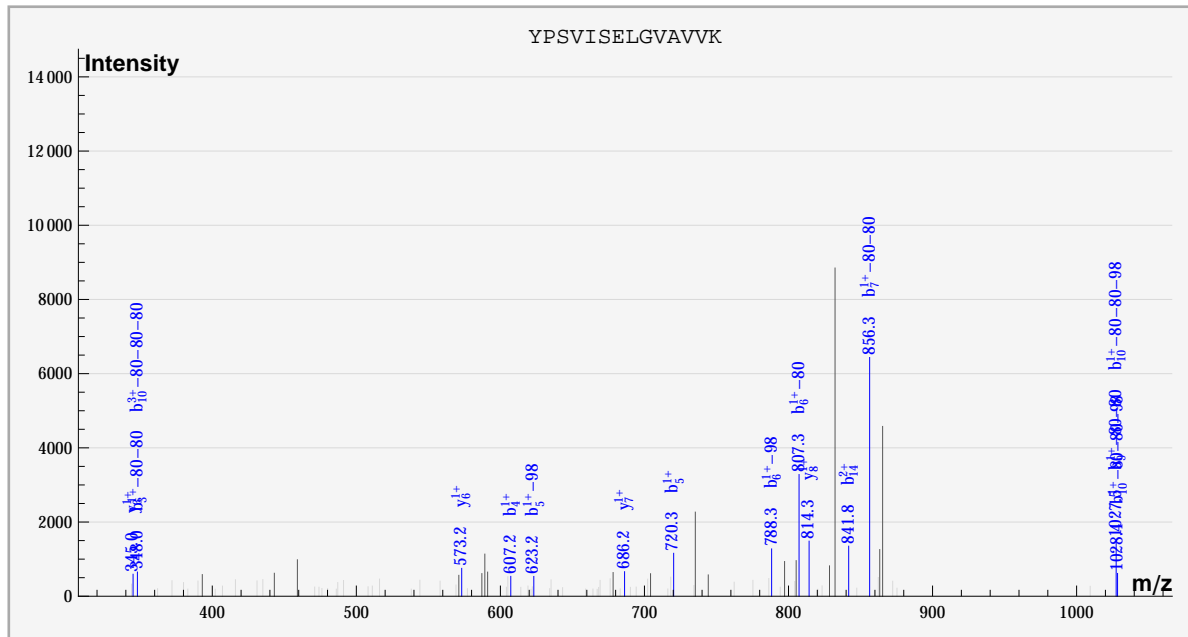

|   | #  | b | b* | #  | y | y* | P | P* |
|---|----|---|----|----|---|----|---|----|
| Y | 1  |   |    |    |   |    |   |    |
| P | 2  |   |    | 13 |   |    |   |    |
| S | 3  |   | ✓  | 12 |   |    |   |    |
| V | 4  | ✓ |    | 11 |   |    |   |    |
| I | 5  | ✓ | ✓  | 10 |   |    |   |    |
| S | 6  |   | ✓  | 9  |   |    |   |    |
| E | 7  |   | ✓  | 8  | ✓ |    |   |    |
| L | 8  |   |    | 7  | ✓ |    |   |    |
| G | 9  |   | ✓  | 6  | ✓ |    |   |    |
| V | 10 |   | ✓  | 5  |   |    |   |    |
| A | 11 |   |    | 4  |   |    |   |    |
| V | 12 |   |    | 3  | ✓ |    |   |    |
| V | 13 |   |    | 2  |   |    |   |    |
| K | 14 | ✓ |    | 1  |   |    |   |    |

Y P S V I S E L G V A V V K

dbValid true SEMMILSSLTPTER Oxidation\_M(2),PHOS(1) 2. 852.  
 1.87245 5.25721 100. ? 2928. S\_Acido\_new%g|68568481|gb|AAY81410.1|  
 SEMMILSSLTPTER%:PHOS::Oxidation\_M:Oxidation\_M:.....:sample\_1%compd\_1368

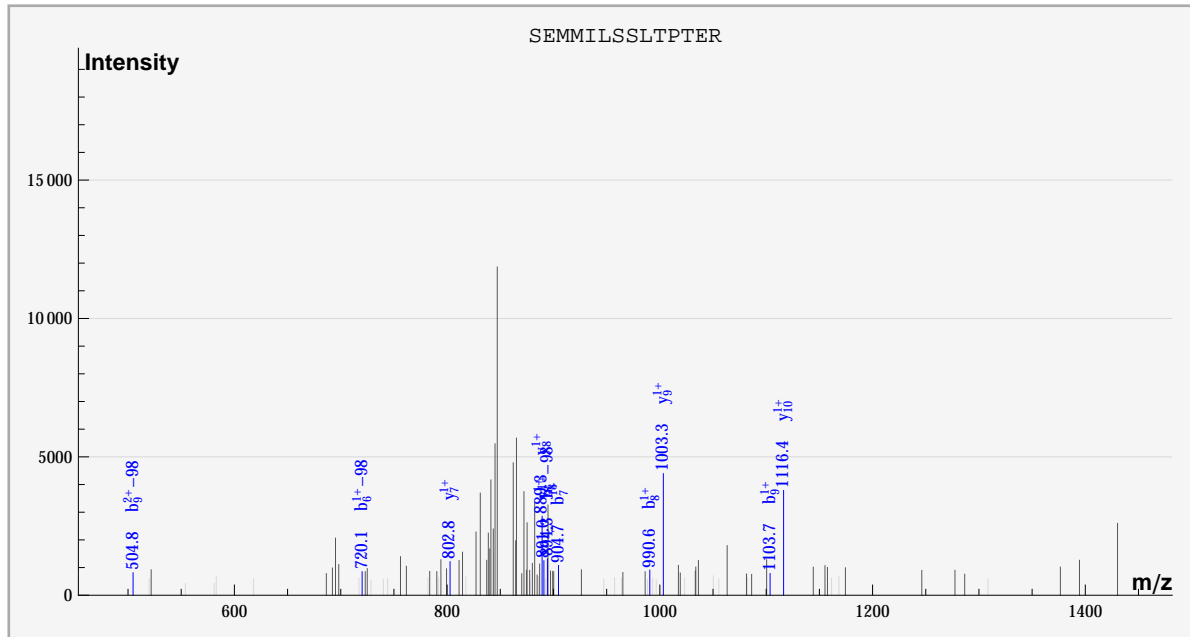

|   | #  | b | b* | #  | y | y* | P | P* |
|---|----|---|----|----|---|----|---|----|
| S | 1  |   |    |    |   |    |   |    |
| E | 2  |   |    | 13 |   |    |   |    |
| M | 3  |   |    | 12 |   |    |   |    |
| M | 4  |   |    | 11 |   |    |   |    |
| I | 5  |   |    | 10 |   | ✓  |   |    |
| L | 6  |   | ✓  | 9  |   | ✓  |   |    |
| S | 7  | ✓ |    | 8  |   | ✓  |   |    |
| S | 8  | ✓ | ✓  | 7  |   | ✓  |   |    |
| L | 9  | ✓ | ✓  | 6  |   |    |   |    |
| T | 10 |   |    | 5  |   |    |   |    |
| P | 11 |   |    | 4  |   |    |   |    |
| T | 12 |   |    | 3  |   |    |   |    |
| E | 13 |   |    | 2  |   |    |   |    |
| R | 14 |   |    | 1  |   |    |   |    |

S E M M I L S S L T P T E R

dbValid true YNDYDGIGLLSIKR PHOS(1) 2. 852. 1.91108 5.56396 100. ? 2934.  
 S\_Acido\_new%gi|68568578|gb|AAY81507.1| YNDYDGIGLLSIKR%:::PHOS:::sample\_3%compd\_1372

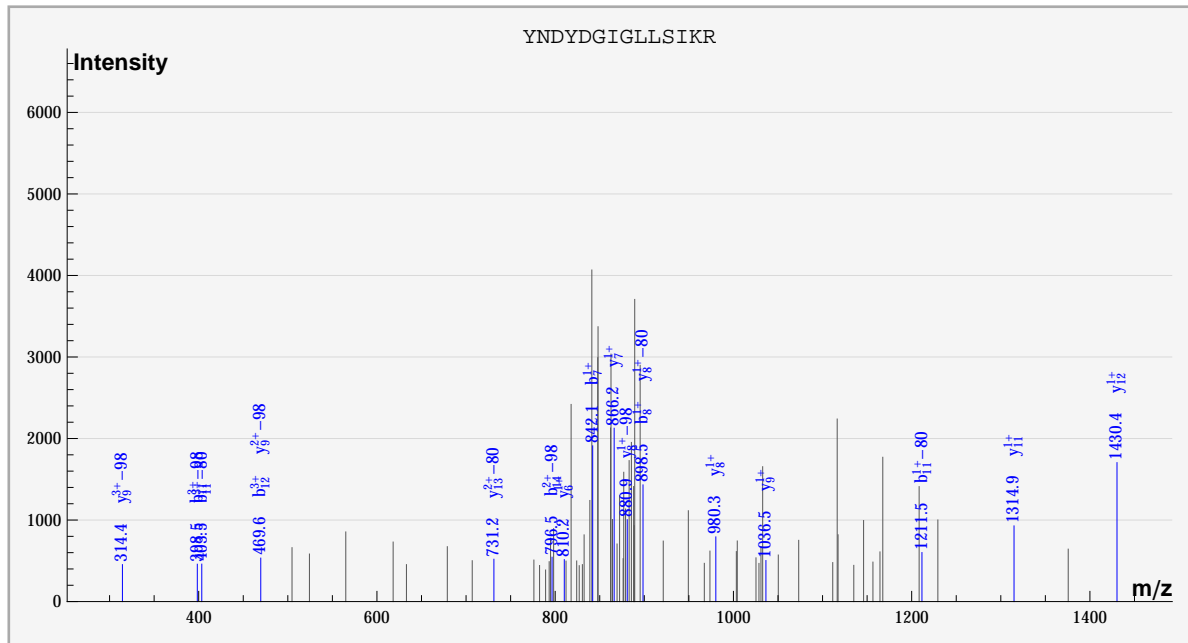

|   | #  | b | b* | #  | y | y* | P | P* |
|---|----|---|----|----|---|----|---|----|
| Y | 1  |   |    |    |   |    |   |    |
| N | 2  |   |    | 13 |   | ✓  |   |    |
| D | 3  |   |    | 12 | ✓ |    |   |    |
| Y | 4  |   |    | 11 | ✓ |    |   |    |
| D | 5  |   |    | 10 |   |    |   |    |
| G | 6  |   |    | 9  | ✓ | ✓  |   |    |
| I | 7  | ✓ |    | 8  | ✓ | ✓  |   |    |
| G | 8  | ✓ |    | 7  | ✓ |    |   |    |
| L | 9  |   |    | 6  | ✓ |    |   |    |
| L | 10 |   |    | 5  |   |    |   |    |
| S | 11 |   | ✓  | 4  |   |    |   |    |
| I | 12 | ✓ |    | 3  |   |    |   |    |
| K | 13 |   |    | 2  |   |    |   |    |
| R | 14 |   | ✓  | 1  |   |    |   |    |

Y N D Y D G I G L L S I K R

dbValid true YKIFNSNNMTTFK Oxidation\_M(1),PHOS(1) 2. 852. 0.378567 5.21512 100. ? 5358.  
 S\_Acido\_new%gi|68567192|gb|AA80121.1| YKIFNSNNMTTFK%:PHOS:.....:Oxidation\_M:.....:sample\_2%compd\_3732

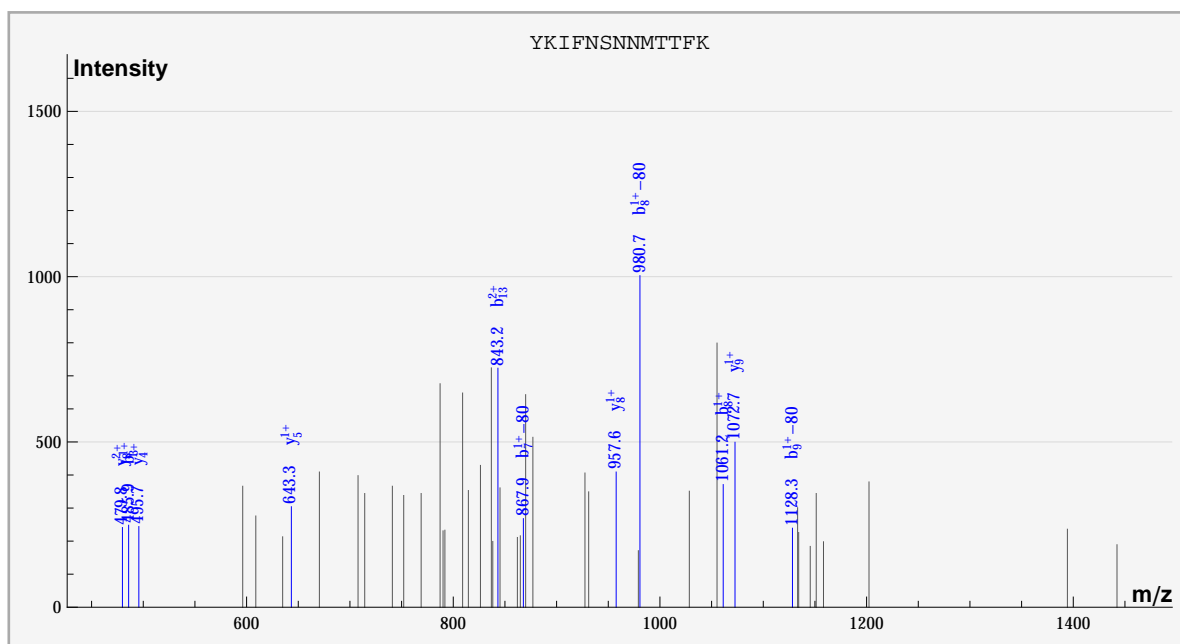

|   | #  | b | b* | #  | y | y* | P | P* |
|---|----|---|----|----|---|----|---|----|
| Y | 1  |   |    |    |   |    |   |    |
| K | 2  |   |    | 12 |   |    |   |    |
| I | 3  | ✓ |    | 11 |   |    |   |    |
| F | 4  |   |    | 10 |   |    |   |    |
| N | 5  |   |    | 9  | ✓ |    |   |    |
| S | 6  |   |    | 8  | ✓ |    |   |    |
| N | 7  |   | ✓  | 7  |   |    |   |    |
| N | 8  | ✓ | ✓  | 6  |   |    |   |    |
| M | 9  |   | ✓  | 5  | ✓ |    |   |    |
| T | 10 |   |    | 4  | ✓ |    |   |    |
| T | 11 |   |    | 3  |   |    |   |    |
| F | 12 |   |    | 2  |   |    |   |    |
| K | 13 | ✓ |    | 1  |   |    |   |    |

Y K I F N S N N M T T F K

dbValid true FLYIIEIINKLSR PHOS(1) 2. 853. -1.52942 5.6762 100. ? 3744.  
 S\_Acido\_new%gi|68567946|gb|AA80875.1| FLYIIEIINKLSR%:::PHOS:::sample\_2%compd\_2272

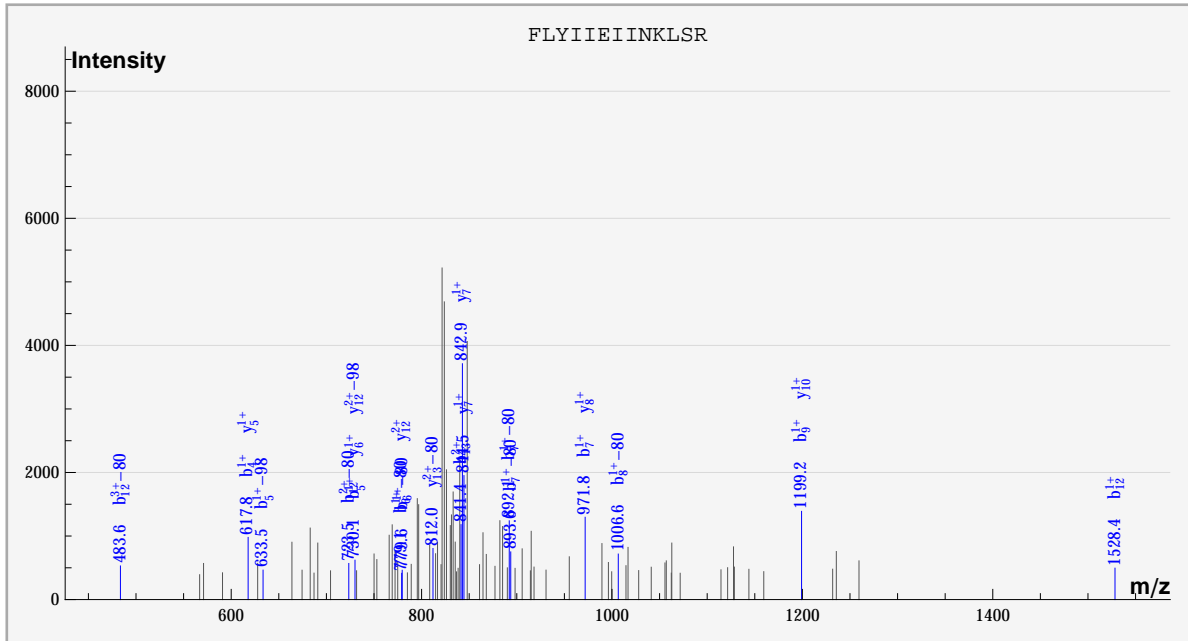

|   | #  | b | b* | #  | y | y* | P | P* |
|---|----|---|----|----|---|----|---|----|
| F | 1  |   |    |    |   |    |   | ✓  |
| L | 2  |   |    | 12 | ✓ | ✓  |   |    |
| Y | 3  |   |    | 11 |   |    |   |    |
| I | 4  | ✓ |    | 10 | ✓ |    |   |    |
| I | 5  | ✓ | ✓  | 9  |   |    |   |    |
| E | 6  |   | ✓  | 8  | ✓ |    |   |    |
| I | 7  | ✓ | ✓  | 7  | ✓ |    |   |    |
| I | 8  |   | ✓  | 6  | ✓ |    |   |    |
| N | 9  | ✓ |    | 5  | ✓ |    |   |    |
| K | 10 |   |    | 4  |   |    |   |    |
| L | 11 |   |    | 3  |   |    |   |    |
| S | 12 | ✓ | ✓  | 2  |   |    |   |    |
| R | 13 | ✓ |    | 1  |   |    |   |    |

[ F ] [ L ] [ Y ] [ I ] [ I ] [ E ] [ I ] [ I ] [ N ] [ K ] [ L ] [ S ] [ R ]

dbValid true MTQTTTQVIVDYK Oxidation\_M(1),PHOS(2) 2. 853. -0.646443 5.04179 100. ? 3804.  
 S\_Acido\_new%gi|68568555|gb|AA81484.1| MTQTTTQVIVDYK%:Oxidation\_M:PHOS::PHOS:::sample\_2%cmpd\_2328

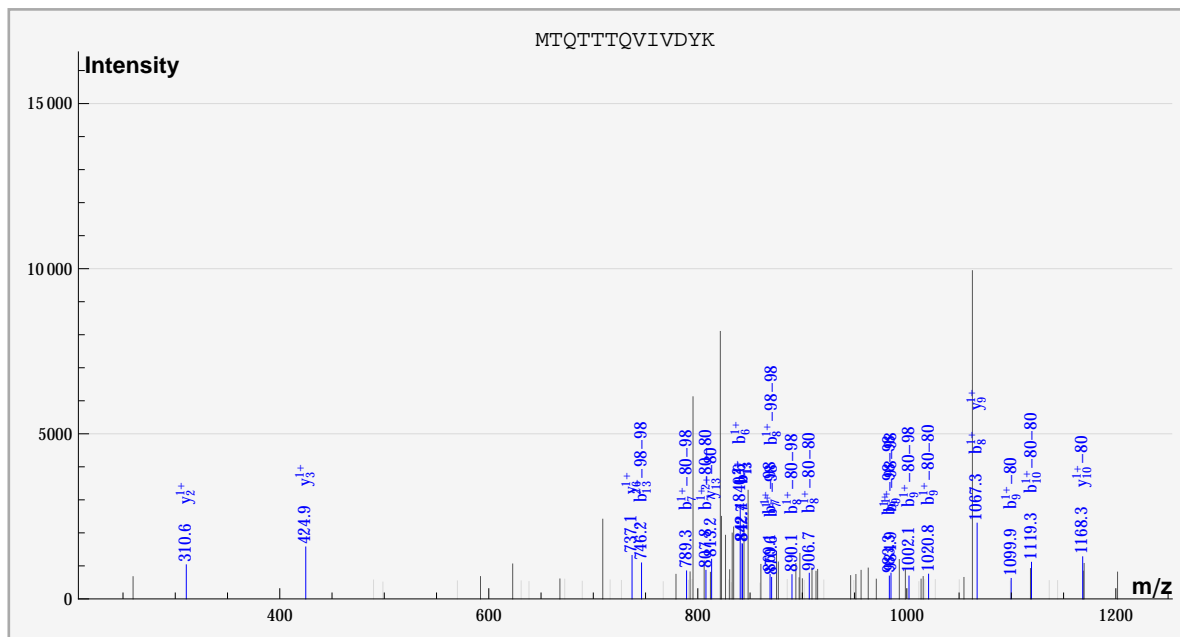

|   | #  | b | b* | #  | y | y* | P | P* |
|---|----|---|----|----|---|----|---|----|
| M | 1  |   |    |    |   |    |   | ✓  |
| T | 2  |   |    | 12 |   |    |   |    |
| Q | 3  |   |    | 11 |   |    |   |    |
| T | 4  |   |    | 10 |   |    |   |    |
| T | 5  |   |    | 9  |   | ✓  |   |    |
| T | 6  | ✓ |    | 8  |   |    |   |    |
| Q | 7  |   | ✓  | 7  |   |    |   |    |
| V | 8  | ✓ | ✓  | 6  |   | ✓  |   |    |
| I | 9  |   | ✓  | 5  |   |    |   |    |
| V | 10 |   | ✓  | 4  |   |    |   |    |
| D | 11 |   |    | 3  |   | ✓  |   |    |
| Y | 12 |   |    | 2  |   | ✓  |   |    |
| K | 13 | ✓ | ✓  | 1  |   |    |   |    |

「 M T Q 「 T 「 T T 」 Q 」 V 」 I 」 V 」 D 「 Y K 」

dbValid true LTVNVVK PHOS(1) 1. 854. -1.54099 5.22812 100. ? 2802.  
 S\_Acido\_new%gi|68567577|gb|AAY80506.1| LTVNVVK%::PHOS:::sample\_2%compd\_1319

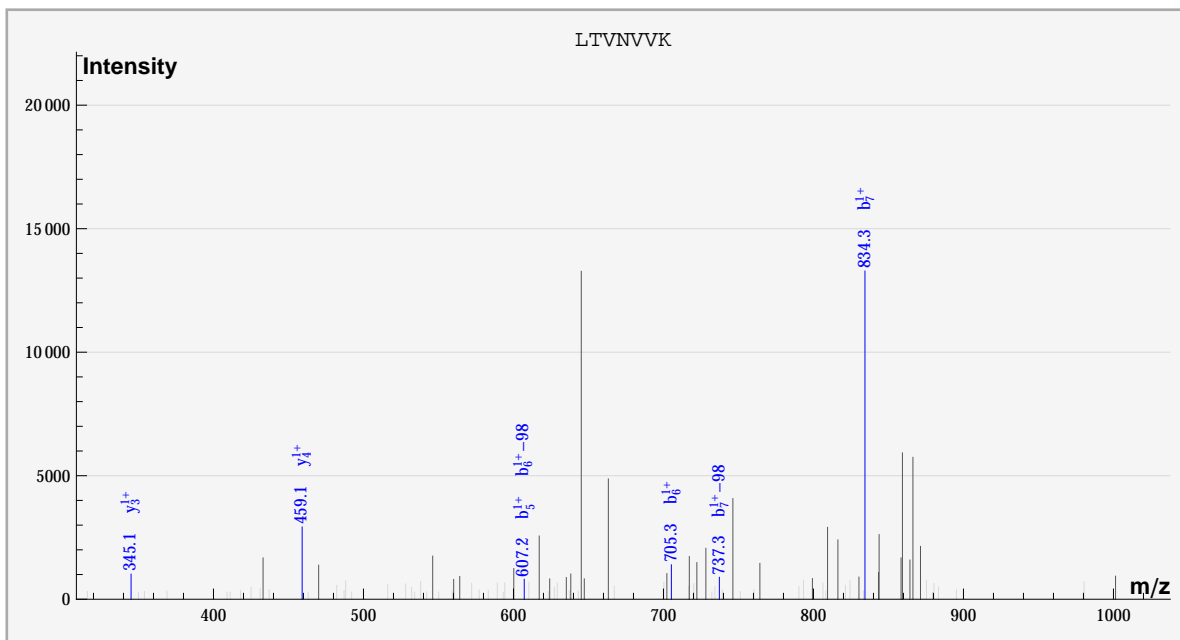

|   | # | b | b* | # | y | y* | P | P* |
|---|---|---|----|---|---|----|---|----|
| L | 1 |   |    |   |   |    |   |    |
| T | 2 |   |    | 6 |   |    |   |    |
| V | 3 |   |    | 5 |   |    |   |    |
| N | 4 |   |    | 4 | ✓ |    |   |    |
| V | 5 | ✓ |    | 3 | ✓ |    |   |    |
| V | 6 | ✓ | ✓  | 2 |   |    |   |    |
| K | 7 | ✓ | ✓  | 1 |   |    |   |    |

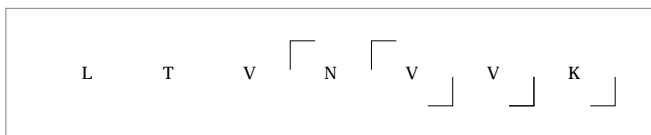

dbValid true LTVNVVK PHOS(1) 1. 854. -1.54099 5.10602 100. ? 2814.  
 S\_Acido\_new%gi|68567577|gb|AAY80506.1| LTVNVVK%::PHOS:::sample\_2%cmpd\_1329

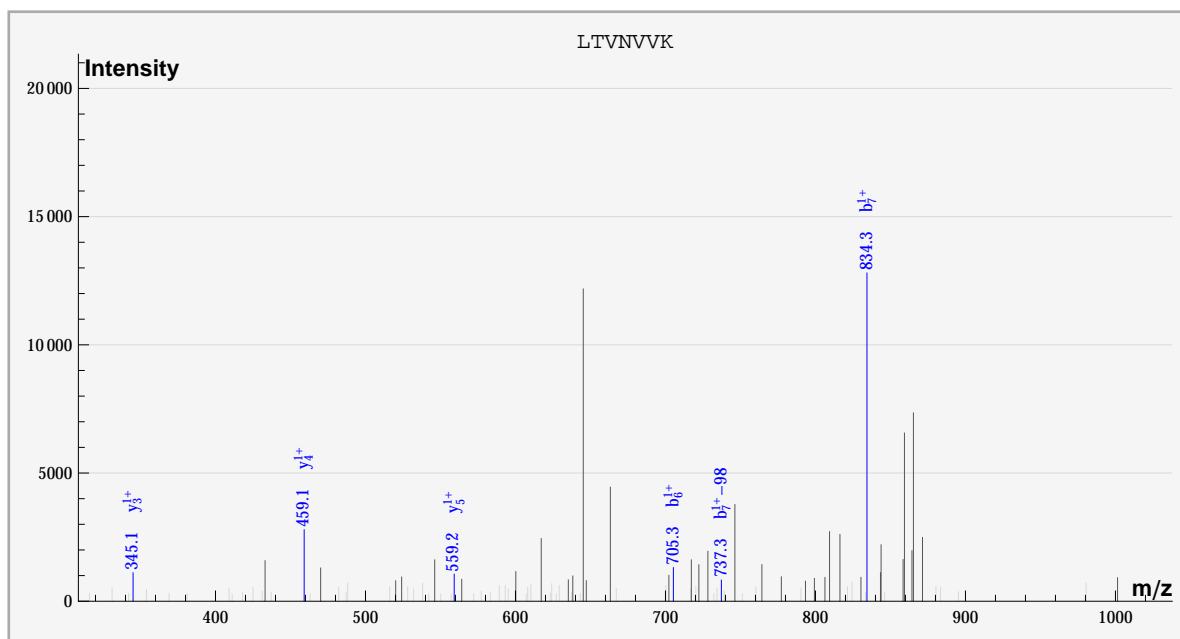

|   | # | b | b* | # | y | y* | P | P* |
|---|---|---|----|---|---|----|---|----|
| L | 1 |   |    |   |   |    |   |    |
| T | 2 |   |    | 6 |   |    |   |    |
| V | 3 |   |    | 5 | ✓ |    |   |    |
| N | 4 |   |    | 4 | ✓ |    |   |    |
| V | 5 |   |    | 3 | ✓ |    |   |    |
| V | 6 | ✓ |    | 2 |   |    |   |    |
| K | 7 | ✓ | ✓  | 1 |   |    |   |    |

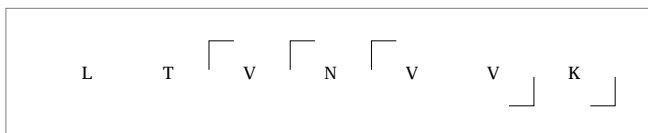



dbValid true LTVNVVK PHOS(1) 1. 854. -1.54099 5.21095 100. ? 2826.  
 S\_Acido\_new%gi|68567577|gb|AAY80506.1| LTVNVVK%::PHOS:::sample\_2%compd\_1340

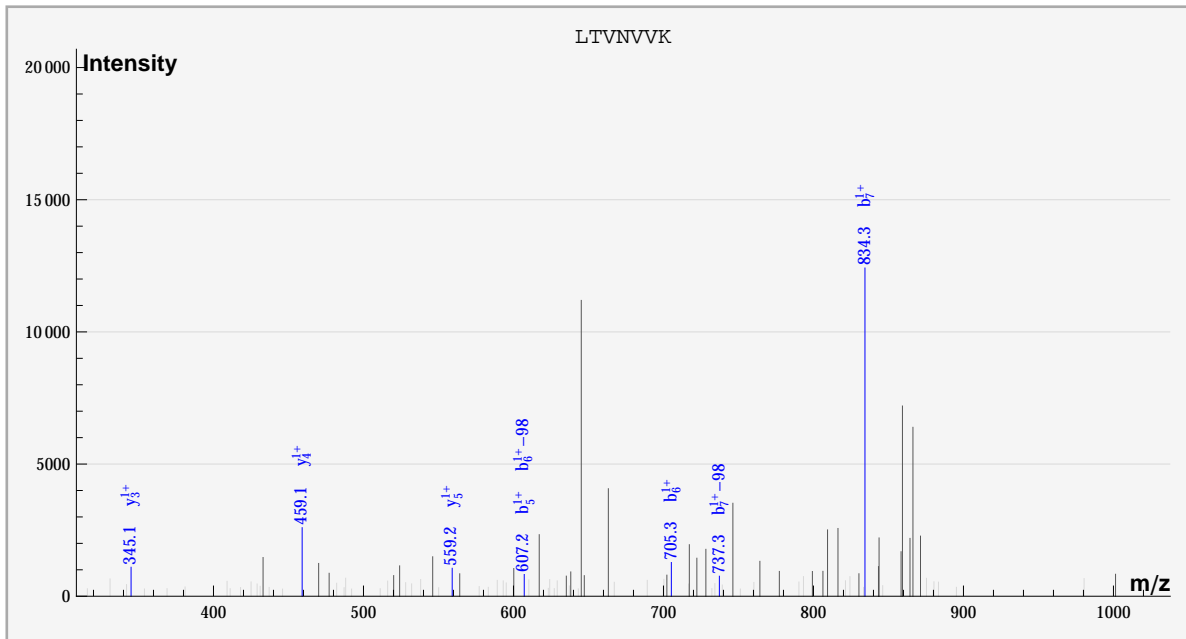

|   | # | b | b* | # | y | y* | P | P* |
|---|---|---|----|---|---|----|---|----|
| L | 1 |   |    |   |   |    |   |    |
| T | 2 |   |    | 6 |   |    |   |    |
| V | 3 |   |    | 5 | ✓ |    |   |    |
| N | 4 |   |    | 4 | ✓ |    |   |    |
| V | 5 | ✓ |    | 3 | ✓ |    |   |    |
| V | 6 | ✓ | ✓  | 2 |   |    |   |    |
| K | 7 | ✓ | ✓  | 1 |   |    |   |    |

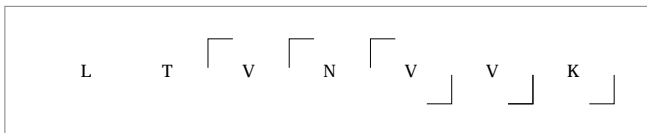

dbValid true LTVNVVK PHOS(1) 1. 854. -1.54099 5.26229 100. ? 2898.  
 S\_Acido\_new%gi|68567577|gb|AAY80506.1| LTVNVVK%::PHOS:::%sample\_2%cmpd\_1400

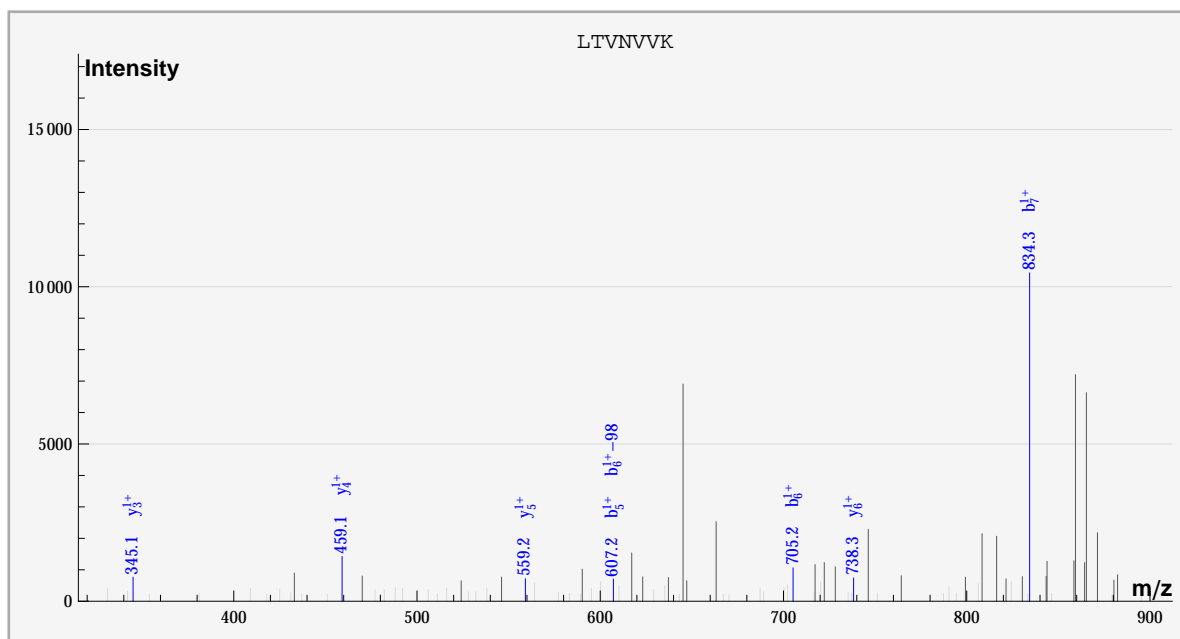

|   | # | b | b* | # | y | y* | P | P* |
|---|---|---|----|---|---|----|---|----|
| L | 1 |   |    |   |   |    |   |    |
| T | 2 |   |    | 6 | ✓ |    |   |    |
| V | 3 |   |    | 5 | ✓ |    |   |    |
| N | 4 |   |    | 4 | ✓ |    |   |    |
| V | 5 | ✓ |    | 3 | ✓ |    |   |    |
| V | 6 | ✓ | ✓  | 2 |   |    |   |    |
| K | 7 | ✓ |    | 1 |   |    |   |    |

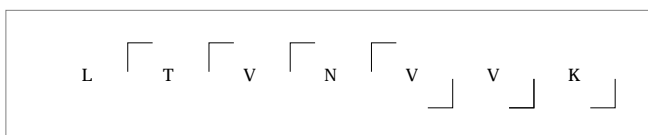

dbValid true GVTVYR PHOS(2) 1. 854. 0.320855 6.5983 100. ? 3330.  
 S\_Acido\_new%gil68567759|gb|AAy80688.1| GVTVYR%:::PHOS::PHOS::%sample\_2%cmpd\_1897

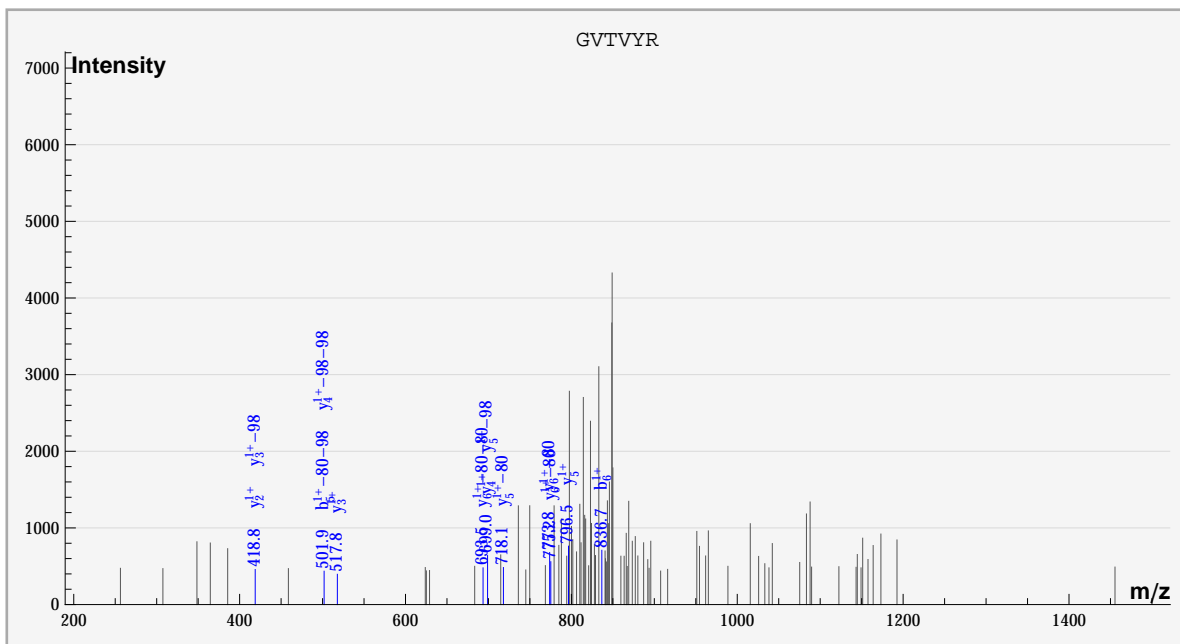

|   | # | b | b* | # | y | y* | P | P* |
|---|---|---|----|---|---|----|---|----|
| G | 1 |   |    |   |   |    |   | ✓  |
| V | 2 |   |    | 5 | ✓ | ✓  |   |    |
| T | 3 |   |    | 4 | ✓ | ✓  |   |    |
| V | 4 |   |    | 3 | ✓ | ✓  |   |    |
| Y | 5 | ✓ |    | 2 | ✓ |    |   |    |
| R | 6 | ✓ |    | 1 |   |    |   |    |

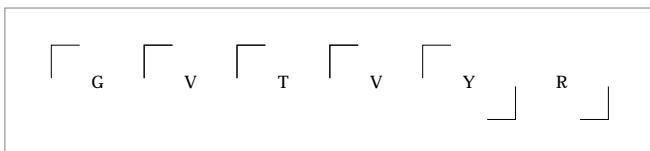

dbValid true HYTHSK PHOS(1) 1. 854. -1.66003 5.42351 100. ? 4578.

S\_Acido\_new%gi|68568193|gb|AAY81122.1| HYTHSK%::::PHOS:::sample\_2%compd\_3037

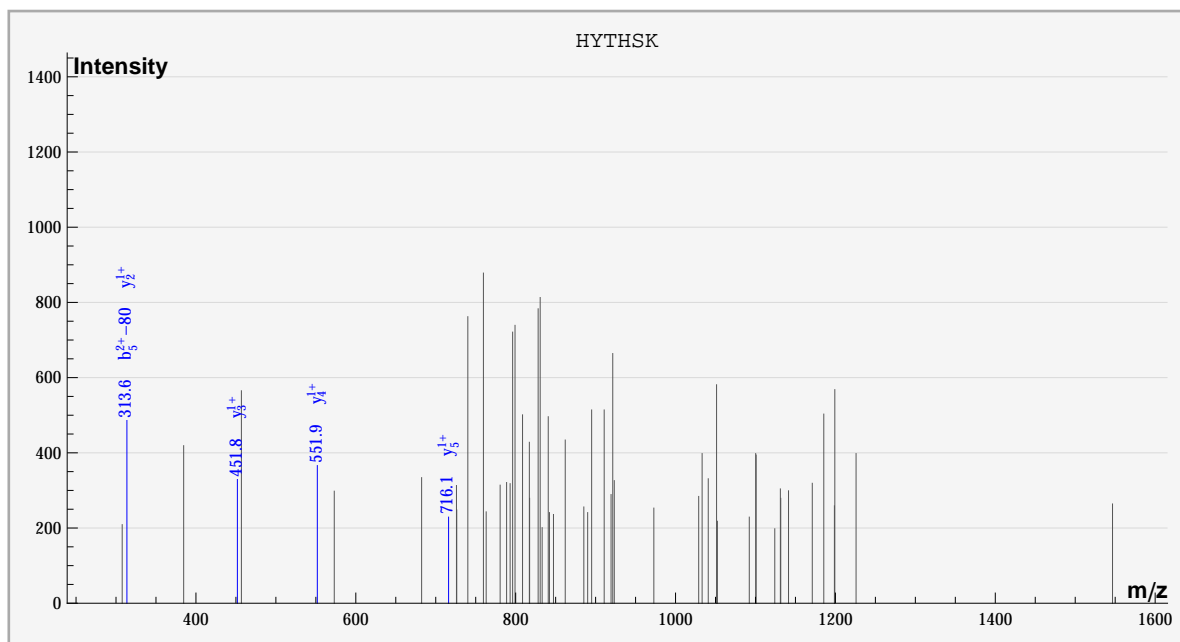

|   | # | b | b* | # | y | y* | P | P* |
|---|---|---|----|---|---|----|---|----|
| H | 1 |   |    |   |   |    |   |    |
| Y | 2 |   |    | 5 | ✓ |    |   |    |
| T | 3 |   |    | 4 | ✓ |    |   |    |
| H | 4 |   |    | 3 | ✓ |    |   |    |
| S | 5 | ✓ |    | 2 | ✓ |    |   |    |
| K | 6 |   |    | 1 |   |    |   |    |

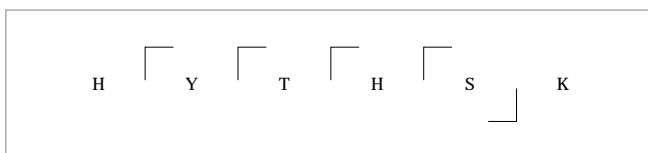

dbValid true EYTKLAITYSRK PHOS(3) 2. 855. 1.85847 5.34748 100. ? 2514.

S\_Acido\_new%gi|68566534|gb|AA79463.1| EYTKLAITYSRK%:PHOS:PHOS:.....PHOS:::%sample\_2%cmpd\_1158

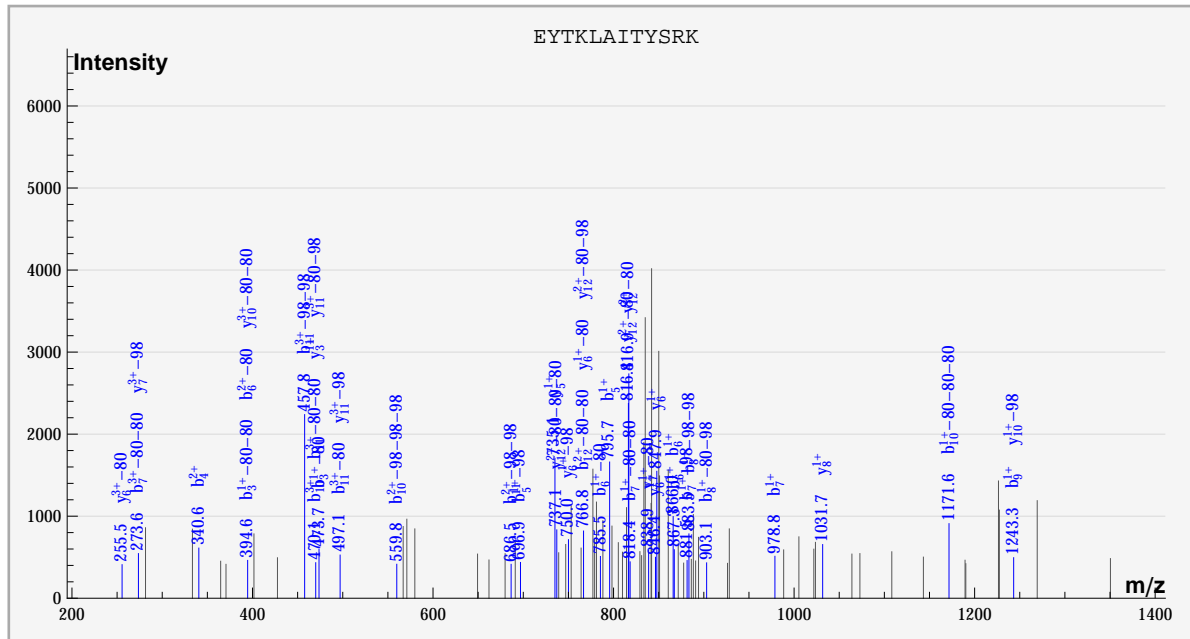

|   | #  | b | b* | #  | y | y* | P | P* |
|---|----|---|----|----|---|----|---|----|
| E | 1  |   |    |    |   |    |   | ✓  |
| Y | 2  |   |    | 11 |   | ✓  |   |    |
| T | 3  |   | ✓  | 10 |   | ✓  |   |    |
| K | 4  | ✓ |    | 9  |   |    |   |    |
| L | 5  | ✓ | ✓  | 8  | ✓ |    |   |    |
| A | 6  | ✓ | ✓  | 7  |   | ✓  |   |    |
| I | 7  | ✓ | ✓  | 6  | ✓ | ✓  |   |    |
| T | 8  |   | ✓  | 5  | ✓ |    |   |    |
| Y | 9  | ✓ |    | 4  |   |    |   |    |
| S | 10 | ✓ | ✓  | 3  | ✓ |    |   |    |
| R | 11 |   | ✓  | 2  |   |    |   |    |
| K | 12 |   | ✓  | 1  |   |    |   |    |

E Y T K L A I T Y S R K

dbValid true DESKSK PHOS(2) 1. 855. -1.72604 5.12481 100. ? 3432.  
 S\_Acido\_new%gil68568251|gb|AAY81180.1| DESKSK%:::PHOS::PHOS::%sample\_2%compd\_1848

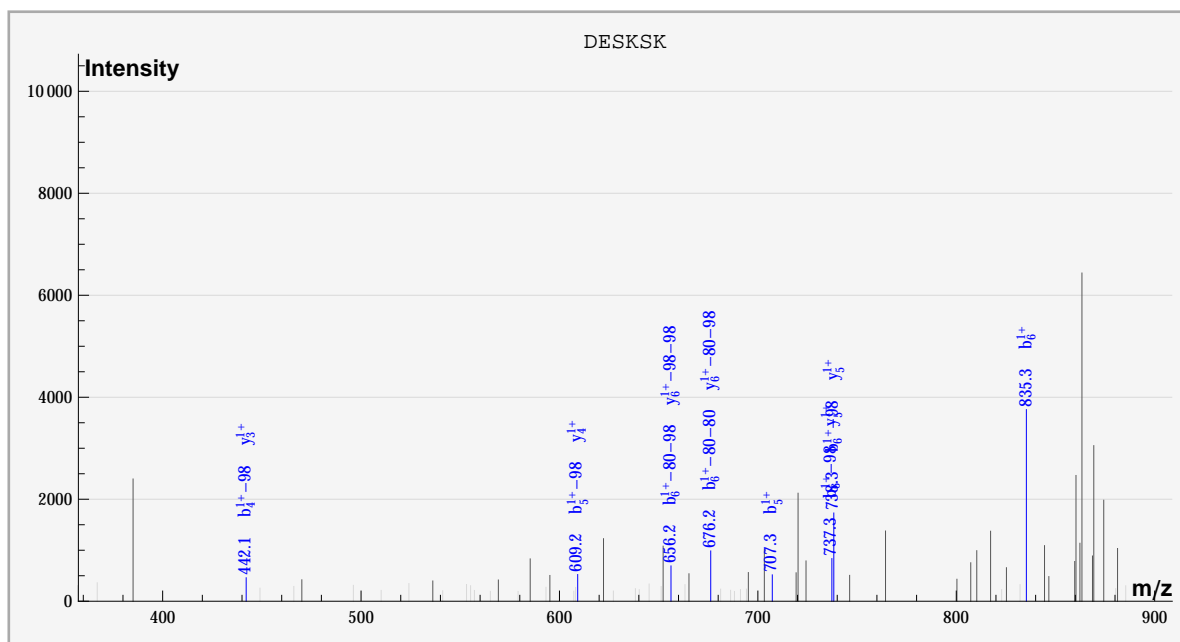

|   | # | b | b* | # | y | y* | P | P* |
|---|---|---|----|---|---|----|---|----|
| D | 1 |   |    |   |   |    |   | ✓  |
| E | 2 |   |    | 5 | ✓ |    |   |    |
| S | 3 |   |    | 4 | ✓ |    |   |    |
| K | 4 | ✓ |    | 3 | ✓ |    |   |    |
| S | 5 | ✓ | ✓  | 2 |   |    |   |    |
| K | 6 | ✓ | ✓  | 1 |   |    |   |    |

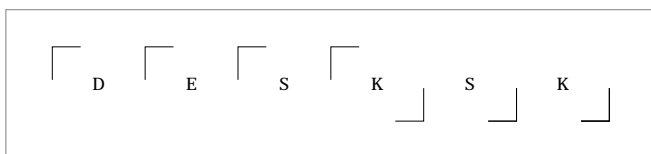

dbValid true DESKSK PHOS(2) 1. 855. -1.72604 5.26919 100. ? 3444.  
 S\_Acido\_new%gi|68568251|gb|AAY81180.1| DESKSK%:::PHOS::PHOS::%sample\_2%cmpd\_1858

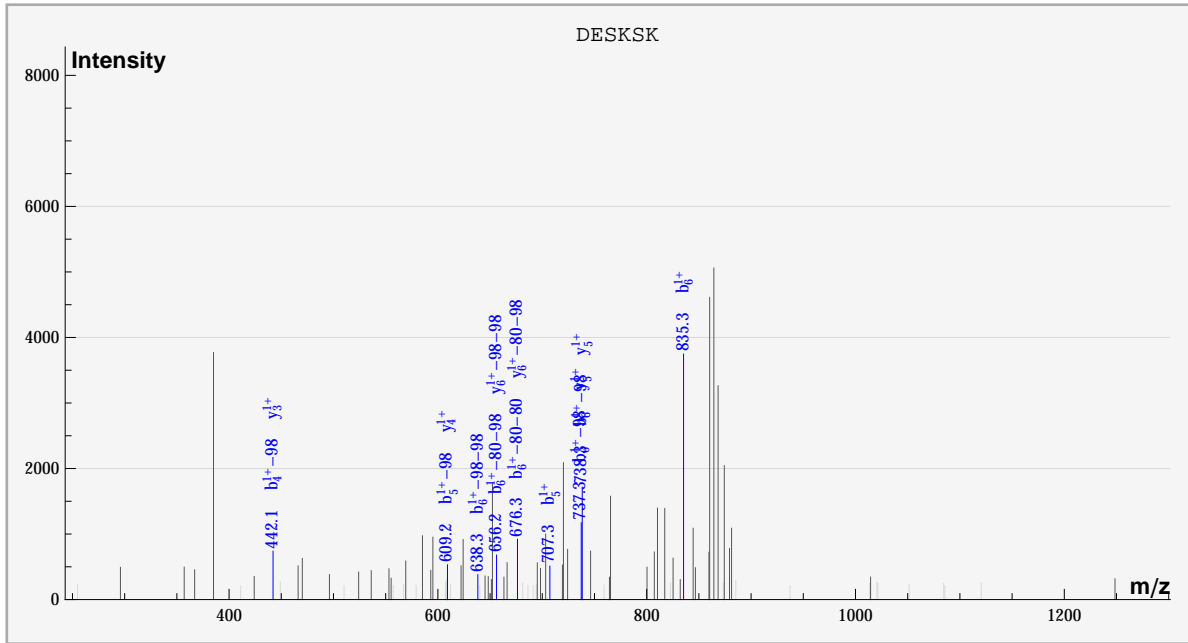

|   | # | b | b* | # | y | y* | P | P* |
|---|---|---|----|---|---|----|---|----|
| D | 1 |   |    |   |   |    |   | ✓  |
| E | 2 |   |    | 5 | ✓ |    |   |    |
| S | 3 |   |    | 4 | ✓ |    |   |    |
| K | 4 |   | ✓  | 3 | ✓ |    |   |    |
| S | 5 | ✓ | ✓  | 2 |   |    |   |    |
| K | 6 | ✓ | ✓  | 1 |   |    |   |    |

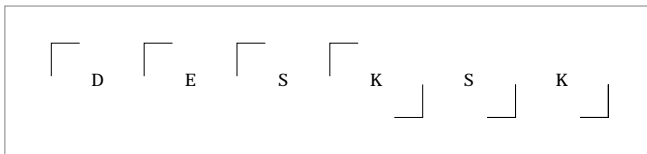

dbValid true MPSSKK Oxidation\_M(1),PHOS(2) 1. 855. -1.70742 5.39925 100. ? 3504.

S\_Acido\_new%gil68567178|gb|AAY80107.1| MPSSKK%:Oxidation\_M::PHOS:PHOS:::sample\_2%compd\_1908

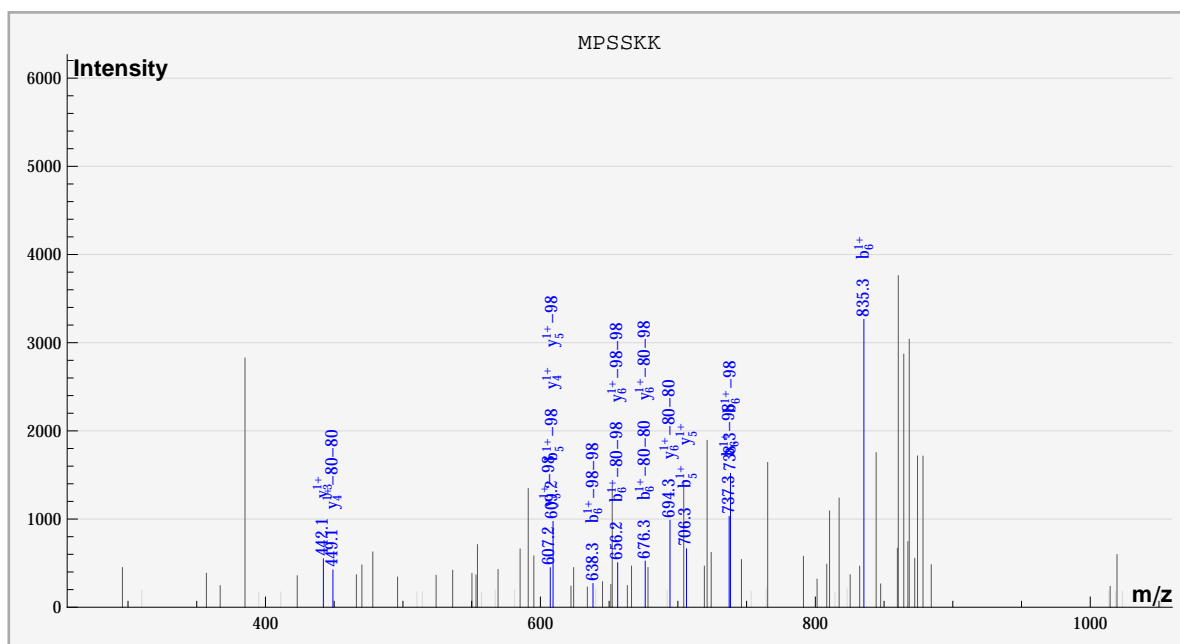

|   | # | b | b* | # | y | y* | P | P* |
|---|---|---|----|---|---|----|---|----|
| M | 1 |   |    |   |   |    |   | ✓  |
| P | 2 |   |    | 5 | ✓ | ✓  |   |    |
| S | 3 |   |    | 4 | ✓ | ✓  |   |    |
| S | 4 |   |    | 3 | ✓ |    |   |    |
| K | 5 | ✓ | ✓  | 2 |   |    |   |    |
| K | 6 | ✓ | ✓  | 1 |   |    |   |    |

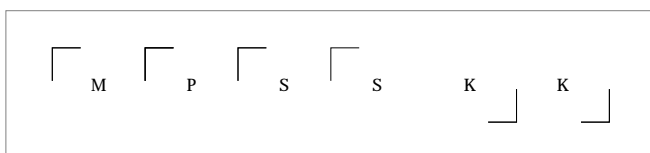



dbValid true MPSSKK Oxidation\_M(1),PHOS(2) 1. 855. -1.70742 5.57645 100. ? 3516.

S\_Acido\_new%gil68567178|gb|AAY80107.1| MPSSKK%:Oxidation\_M::PHOS:PHOS:::sample\_2%compd\_1918

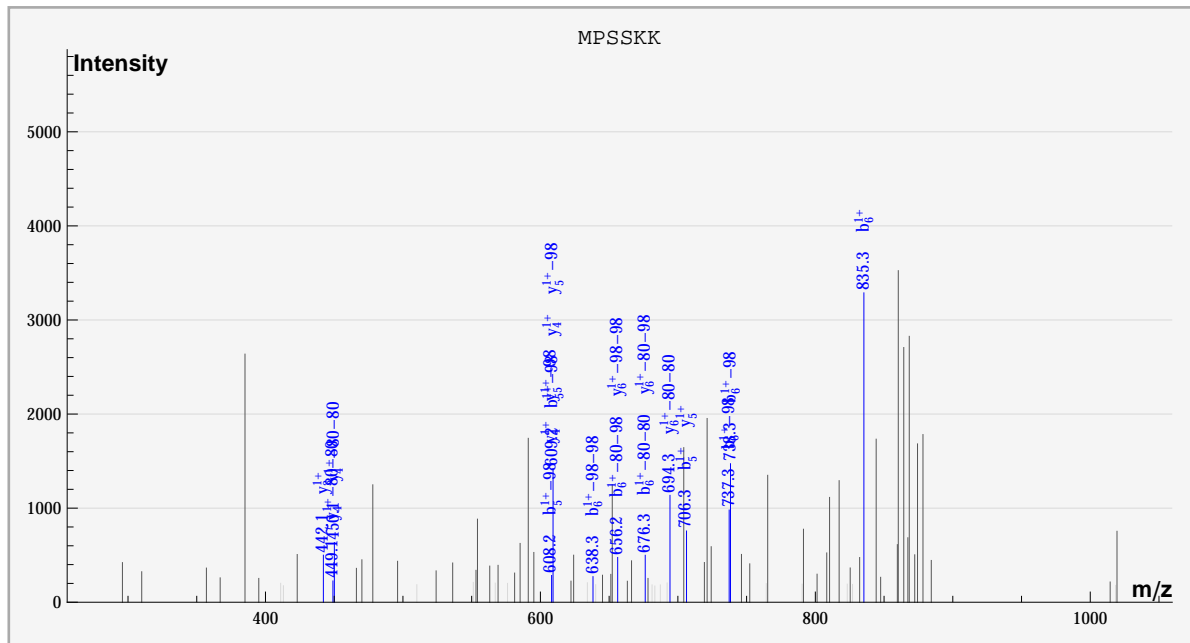

|   | # | b | b* | # | y | y* | P | P* |
|---|---|---|----|---|---|----|---|----|
| M | 1 |   |    |   |   |    |   | ✓  |
| P | 2 |   |    | 5 | ✓ | ✓  |   |    |
| S | 3 |   |    | 4 | ✓ | ✓  |   |    |
| S | 4 |   |    | 3 | ✓ |    |   |    |
| K | 5 | ✓ | ✓  | 2 |   |    |   |    |
| K | 6 | ✓ | ✓  | 1 |   |    |   |    |

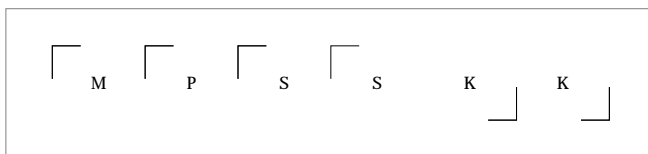

dbValid true MPSSKK Oxidation\_M(1),PHOS(2) 1. 855. -1.70742 5.82867 100. ? 3600.  
 S\_Acido\_new%gil68567178|gb|AAY80107.1| MPSSKK%:Oxidation\_M::PHOS:PHOS:::sample\_2%compd\_1989

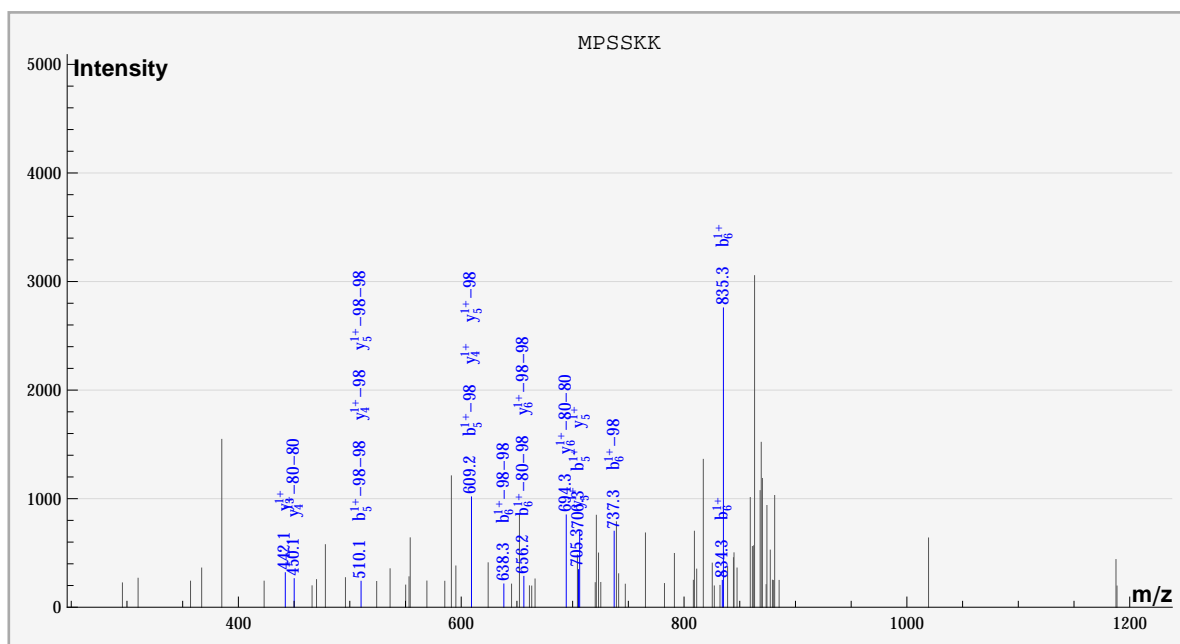

|   | # | b | b* | # | y | y* | P | P* |
|---|---|---|----|---|---|----|---|----|
| M | 1 |   |    |   |   |    |   | ✓  |
| P | 2 |   |    | 5 | ✓ | ✓  |   |    |
| S | 3 |   |    | 4 | ✓ | ✓  |   |    |
| S | 4 |   |    | 3 | ✓ |    |   |    |
| K | 5 | ✓ | ✓  | 2 |   |    |   |    |
| K | 6 | ✓ | ✓  | 1 |   |    |   |    |



dbValid true DGTQLIK PHOS(1) 1. 856. -1.59811 5.19195 100. ? 2706.  
 S\_Acido\_new%gi|68567386|gb|AAY80315.1| DGTQLIK%:::PHOS:::%sample\_2%cmpd\_1241

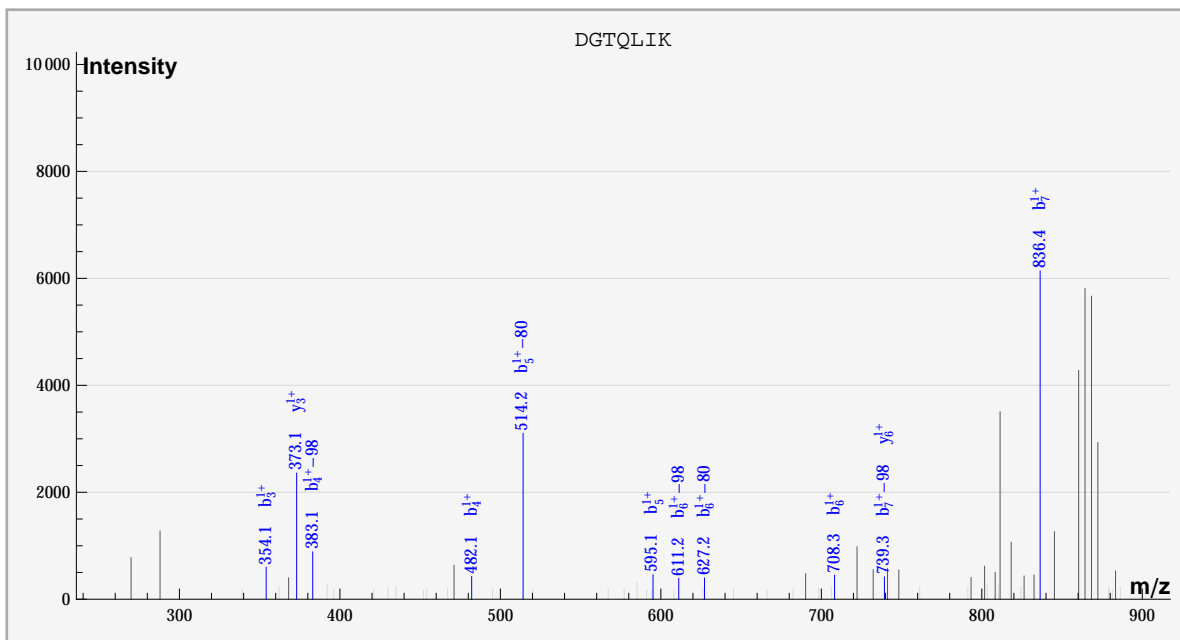

|   | # | b | b* | # | y | y* | P | P* |
|---|---|---|----|---|---|----|---|----|
| D | 1 |   |    |   |   |    |   |    |
| G | 2 |   |    | 6 |   | ✓  |   |    |
| T | 3 | ✓ |    | 5 |   |    |   |    |
| Q | 4 | ✓ | ✓  | 4 |   |    |   |    |
| L | 5 | ✓ | ✓  | 3 |   | ✓  |   |    |
| I | 6 | ✓ | ✓  | 2 |   |    |   |    |
| K | 7 | ✓ | ✓  | 1 |   |    |   |    |

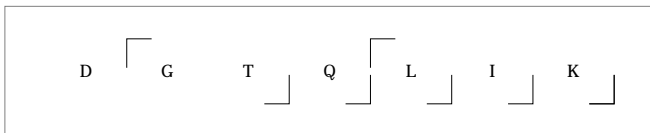

dbValid true IKDLSILHVNSTK PHOS(3) 2. 856. -1.62044 5.36598 100. ? 2742.

S\_Acido\_new%gi|68568204|gb|AAY81133.1| IKDLSILHVNSTK%:::PHOS:::PHOS:PHOS::%sample\_2%cmpd\_1271

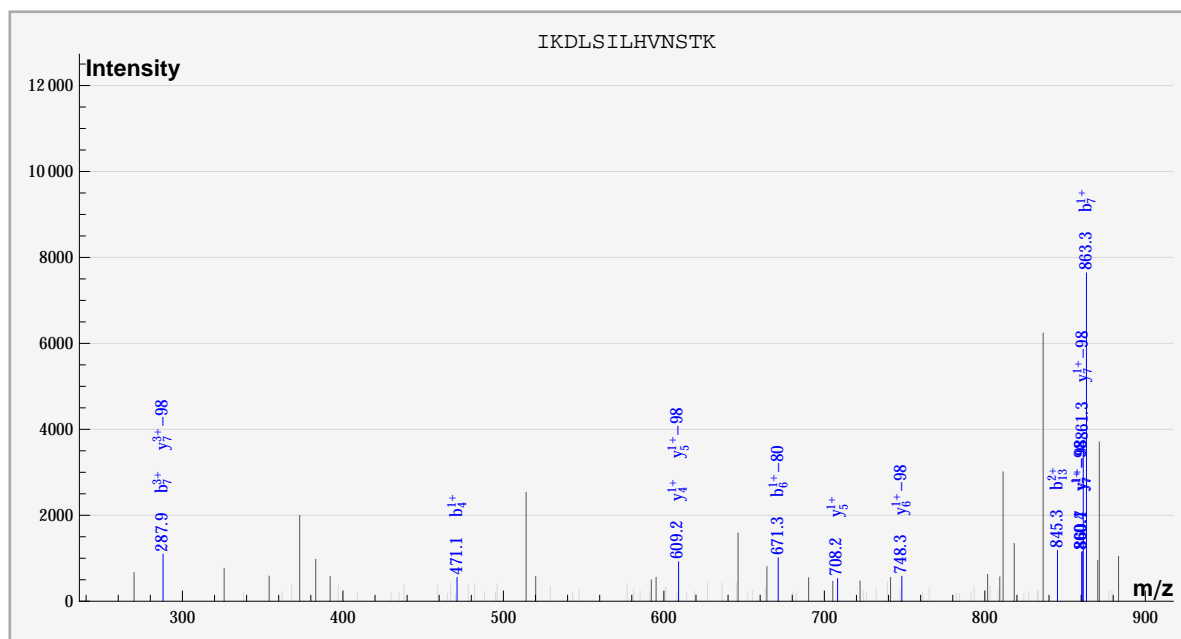

|   | #  | b | b* | #  | y | y* | P | P* |
|---|----|---|----|----|---|----|---|----|
| I | 1  |   |    |    |   |    |   |    |
| K | 2  |   |    | 12 |   |    |   |    |
| D | 3  |   |    | 11 |   |    |   |    |
| L | 4  | ✓ |    | 10 |   |    |   |    |
| S | 5  |   |    | 9  |   |    |   |    |
| I | 6  |   | ✓  | 8  |   |    |   |    |
| L | 7  | ✓ |    | 7  |   | ✓  |   |    |
| H | 8  |   |    | 6  |   | ✓  |   |    |
| V | 9  |   |    | 5  | ✓ | ✓  |   |    |
| N | 10 |   |    | 4  | ✓ |    |   |    |
| S | 11 |   |    | 3  |   |    |   |    |
| T | 12 |   |    | 2  |   |    |   |    |
| K | 13 | ✓ |    | 1  |   |    |   |    |

I K D L S I L H V N S T K

dbValid true DGTQLIK PHOS(1) 1. 856. -1.59811 5.16247 100. ? 2754.  
 S\_Acido\_new%gi|68567386|gb|AAY80315.1| DGTQLIK%:::PHOS:::%sample\_2%cmpd\_1281

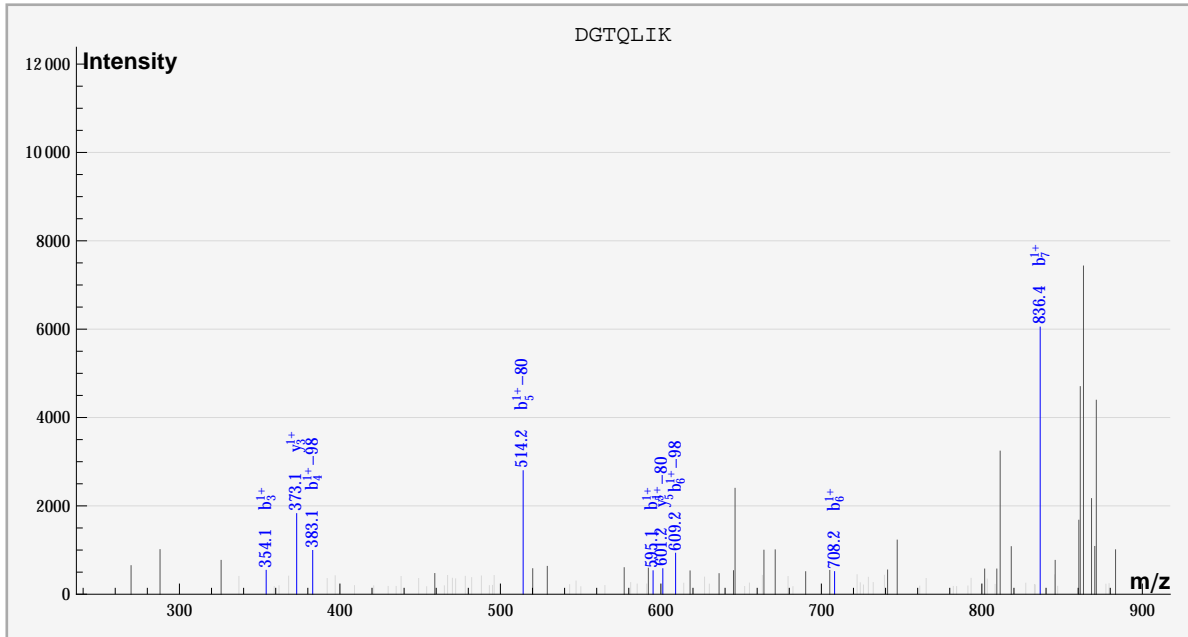

|   | # | b | b* | # | y | y* | P | P* |
|---|---|---|----|---|---|----|---|----|
| D | 1 |   |    |   |   |    |   |    |
| G | 2 |   |    | 6 |   |    |   |    |
| T | 3 | ✓ |    | 5 |   | ✓  |   |    |
| Q | 4 |   | ✓  | 4 |   |    |   |    |
| L | 5 | ✓ | ✓  | 3 |   | ✓  |   |    |
| I | 6 | ✓ | ✓  | 2 |   |    |   |    |
| K | 7 | ✓ |    | 1 |   |    |   |    |

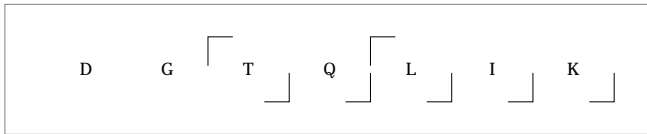

dbValid true RILVLKINNSTSDR PHOS(1) 2. 856. -1.0411 5.27494 100. ? 2778.  
 S\_Acido\_new%gi|68567750|gb|AAy80679.1| RILVLKINNSTSDR%:.....PHOS:.....%sample\_2%compd\_1301

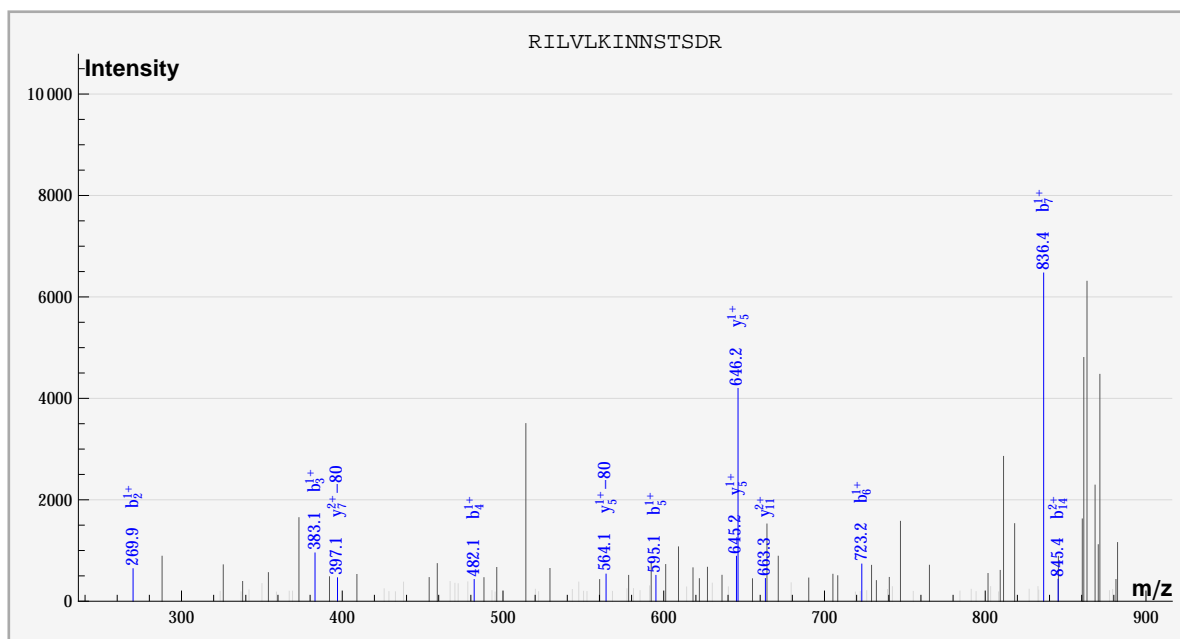

|   | #  | b | b* | #  | y | y* | P | P* |
|---|----|---|----|----|---|----|---|----|
| R | 1  |   |    |    |   |    |   |    |
| I | 2  | ✓ |    | 13 |   |    |   |    |
| L | 3  | ✓ |    | 12 |   |    |   |    |
| V | 4  | ✓ |    | 11 | ✓ |    |   |    |
| L | 5  | ✓ |    | 10 |   |    |   |    |
| K | 6  | ✓ |    | 9  |   |    |   |    |
| I | 7  | ✓ |    | 8  |   |    |   |    |
| N | 8  |   |    | 7  |   | ✓  |   |    |
| N | 9  |   |    | 6  |   |    |   |    |
| S | 10 |   |    | 5  | ✓ | ✓  |   |    |
| T | 11 |   |    | 4  |   |    |   |    |
| S | 12 |   |    | 3  |   |    |   |    |
| D | 13 |   |    | 2  |   |    |   |    |
| R | 14 | ✓ |    | 1  |   |    |   |    |

R I L V L K I N N S T S D R

dbValid true RILVLKINNSTSDR PHOS(1) 2. 856. -1.0411 5.12647 100. ? 2790.  
 S\_Acido\_new%gi|68567750|gb|AAY80679.1| RILVLKINNSTSDR%:::PHOS:::sample\_2%cmpd\_1311

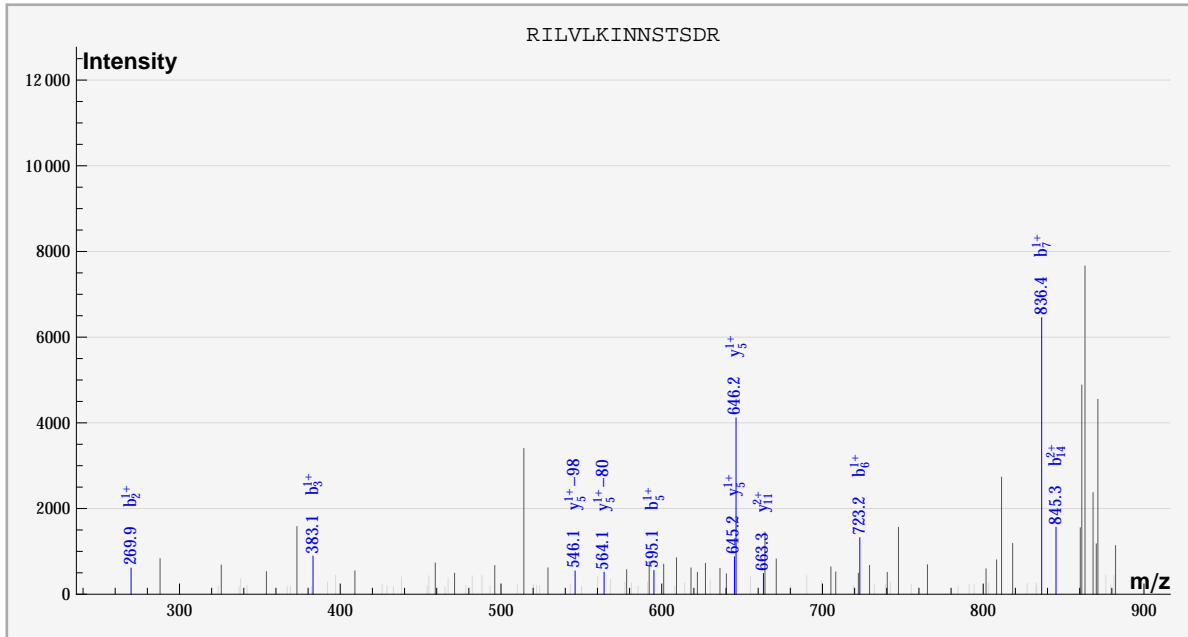

|   | #  | b | b* | #  | y | y* | P | P* |
|---|----|---|----|----|---|----|---|----|
| R | 1  |   |    |    |   |    |   |    |
| I | 2  | ✓ |    | 13 |   |    |   |    |
| L | 3  | ✓ |    | 12 |   |    |   |    |
| V | 4  |   |    | 11 | ✓ |    |   |    |
| L | 5  | ✓ |    | 10 |   |    |   |    |
| K | 6  | ✓ |    | 9  |   |    |   |    |
| I | 7  | ✓ |    | 8  |   |    |   |    |
| N | 8  |   |    | 7  |   |    |   |    |
| N | 9  |   |    | 6  |   |    |   |    |
| S | 10 |   |    | 5  | ✓ | ✓  |   |    |
| T | 11 |   |    | 4  |   |    |   |    |
| S | 12 |   |    | 3  |   |    |   |    |
| D | 13 |   |    | 2  |   |    |   |    |
| R | 14 | ✓ |    | 1  |   |    |   |    |

R I L V L K I N N S T S D R

dbValid true KKISSITLGEENR PHOS(3) 2. 856. 1.86428 5.00465 100. ? 3372.

S\_Acido\_new%gi|68566792|gb|AA79721.1| KKISSITLGEENR%::::PHOS:PHOS::PHOS:::::sample\_3%cmpd\_1736

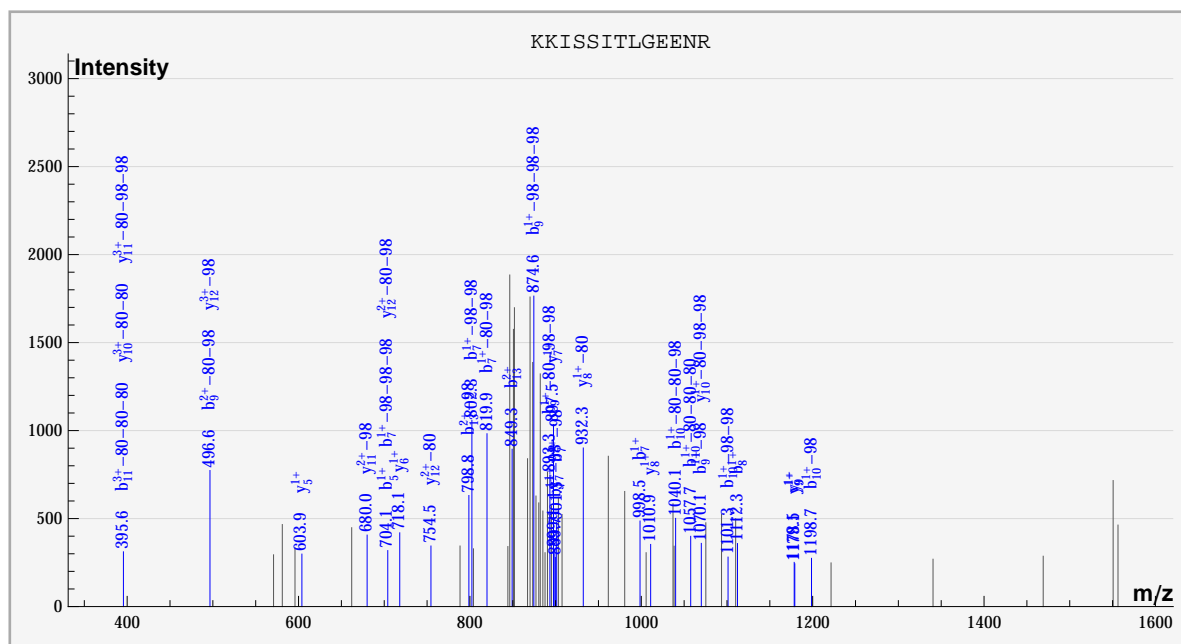

|   | #  | b | b* | #  | y | y* | P | P* |
|---|----|---|----|----|---|----|---|----|
| K | 1  |   |    |    |   |    |   |    |
| K | 2  |   |    | 12 |   | ✓  |   |    |
| I | 3  |   |    | 11 |   | ✓  |   |    |
| S | 4  |   |    | 10 |   | ✓  |   |    |
| S | 5  | ✓ |    | 9  | ✓ |    |   |    |
| I | 6  |   |    | 8  | ✓ | ✓  |   |    |
| T | 7  | ✓ | ✓  | 7  | ✓ |    |   |    |
| L | 8  | ✓ |    | 6  | ✓ |    |   |    |
| G | 9  |   | ✓  | 5  | ✓ |    |   |    |
| E | 10 |   | ✓  | 4  |   |    |   |    |
| E | 11 |   | ✓  | 3  |   |    |   |    |
| N | 12 |   |    | 2  |   |    |   |    |
| R | 13 | ✓ | ✓  | 1  |   |    |   |    |

K K I S S I T L G E E N R



dbValid true VFYNSF PHOS(1) 1. 857. -0.672325 5.19295 100. ? 2250.

S\_Acido\_new%gi|68567539|gb|AAY80468.1| VFYNSF%:::PHOS:::%sample\_2%compd\_916

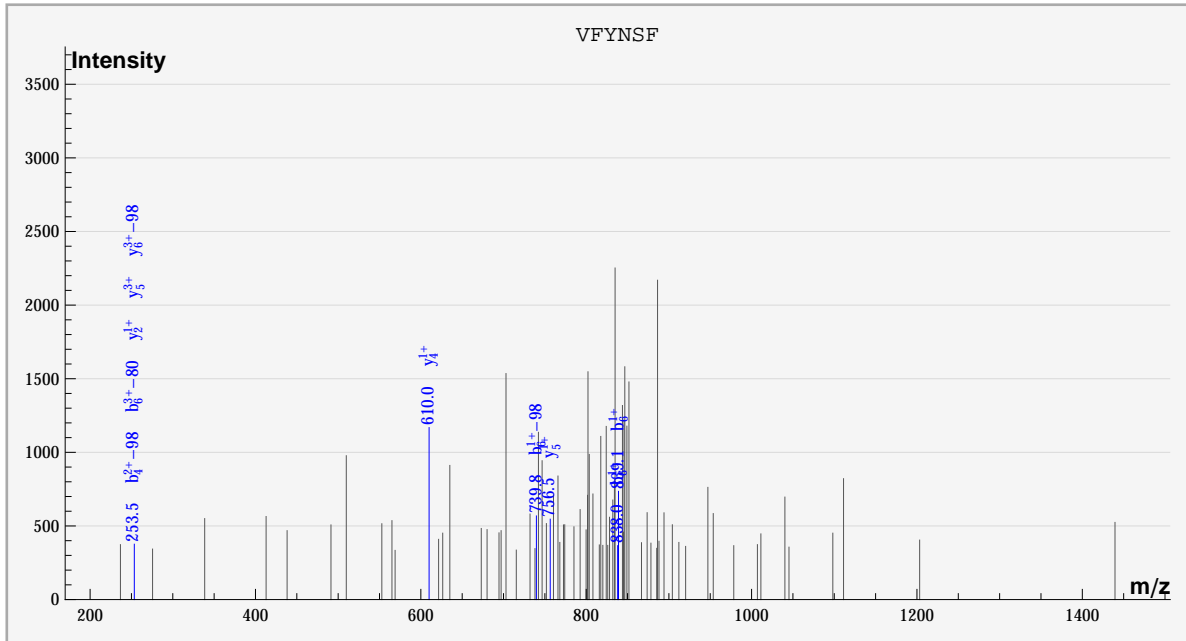

|   | # | b | b* | # | y | y* | P | P* |
|---|---|---|----|---|---|----|---|----|
| V | 1 |   |    |   |   |    |   | ✓  |
| F | 2 |   |    | 5 | ✓ |    |   |    |
| Y | 3 |   |    | 4 | ✓ |    |   |    |
| N | 4 | ✓ |    | 3 |   |    |   |    |
| S | 5 |   | ✓  | 2 | ✓ |    |   |    |
| F | 6 | ✓ | ✓  | 1 |   |    |   |    |

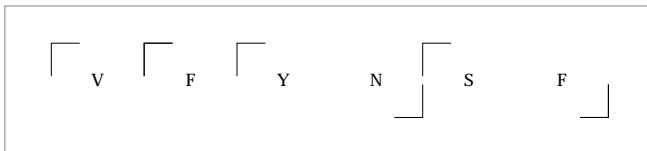

dbValid true DNLSSK PHOS(1) 1. 857. -0.618835 5.32122 100. ? 2784.  
 S\_Acido\_new%gi|68567264|gb|AAY80193.1| DNLSSK%:::::PHOS::%sample\_2%cmpd\_1404

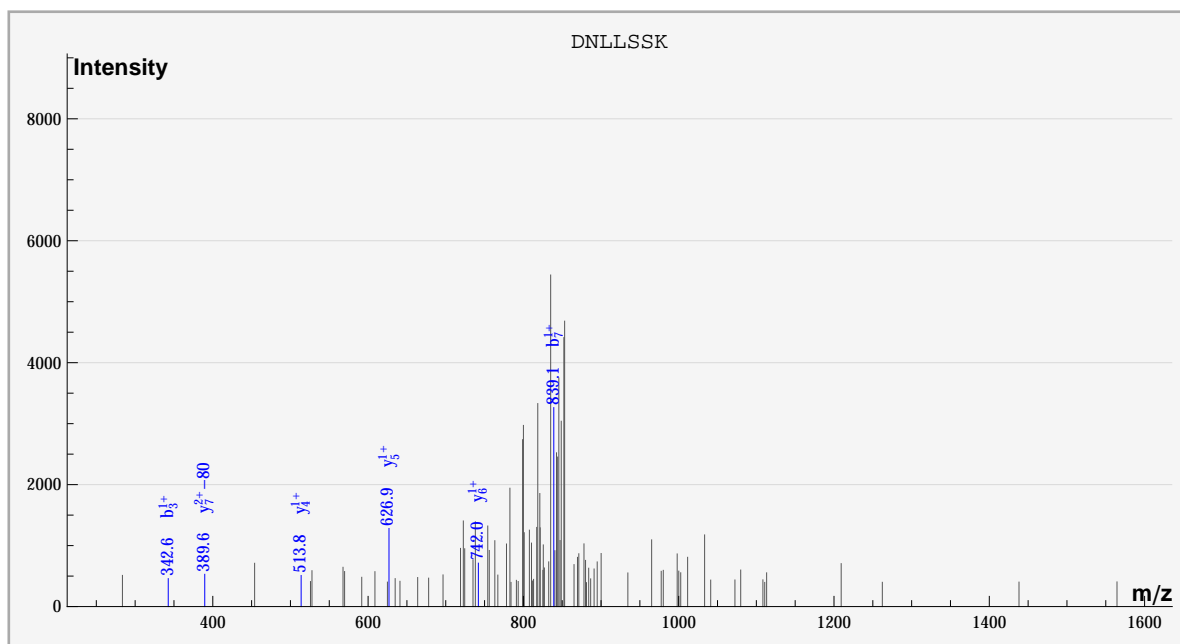

|   | # | b | b* | # | y | y* | P | P* |
|---|---|---|----|---|---|----|---|----|
| D | 1 |   |    |   |   |    |   | ✓  |
| N | 2 |   |    | 6 | ✓ |    |   |    |
| L | 3 | ✓ |    | 5 | ✓ |    |   |    |
| L | 4 |   |    | 4 | ✓ |    |   |    |
| S | 5 |   |    | 3 |   |    |   |    |
| S | 6 |   |    | 2 |   |    |   |    |
| K | 7 | ✓ |    | 1 |   |    |   |    |

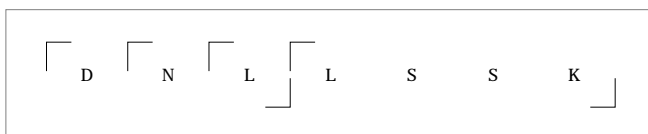

dbValid true IPMISSK PHOS(1) 1. 857. -1.59546 5.02453 100. ? 3216.  
 S\_Acido\_new%gi68566555|gb|AAY79484.1| IPMISSK%:::::PHOS::%sample\_2%compd\_1668

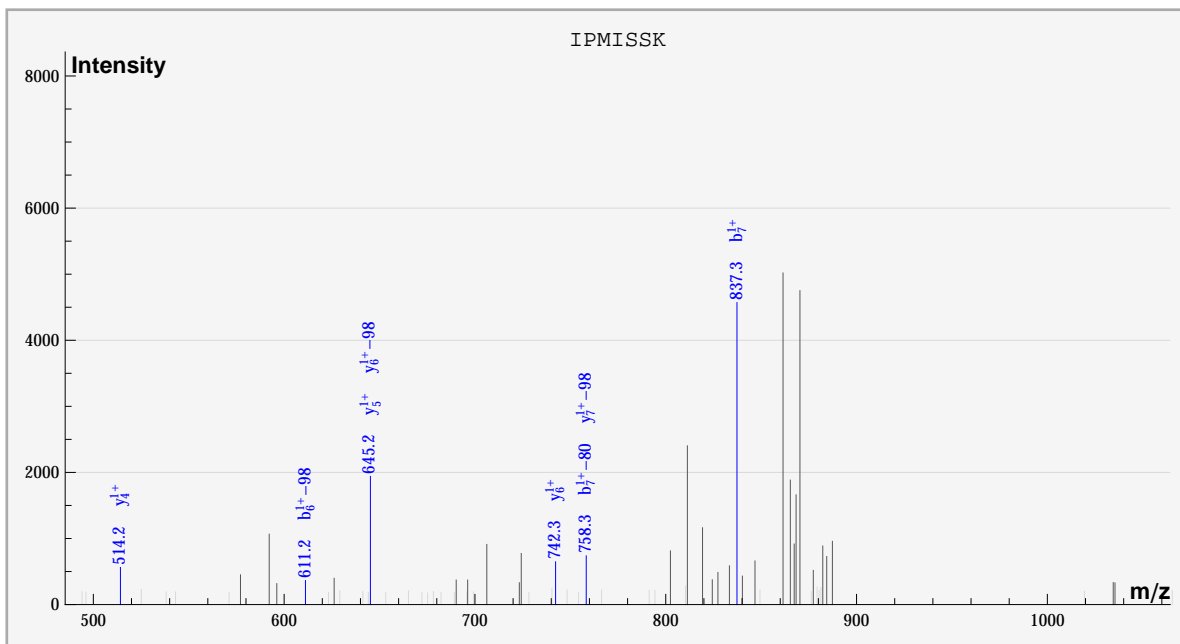

|   | # | b | b* | # | y | y* | P | P* |
|---|---|---|----|---|---|----|---|----|
| I | 1 |   |    |   |   |    |   | ✓  |
| P | 2 |   |    | 6 | ✓ | ✓  |   |    |
| M | 3 |   |    | 5 | ✓ |    |   |    |
| I | 4 |   |    | 4 | ✓ |    |   |    |
| S | 5 |   |    | 3 |   |    |   |    |
| S | 6 |   | ✓  | 2 |   |    |   |    |
| K | 7 | ✓ | ✓  | 1 |   |    |   |    |

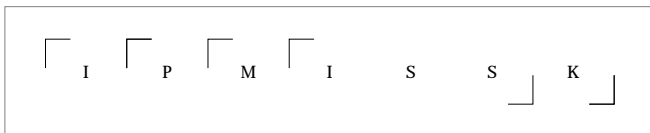

dbValid true IPMISSK PHOS(1) 1. 857. -1.59546 5.31981 100. ? 3240.  
 S\_Acido\_new%gi68566555|gb|AAY79484.1| IPMISSK%:::::PHOS::%sample\_2%compd\_1688

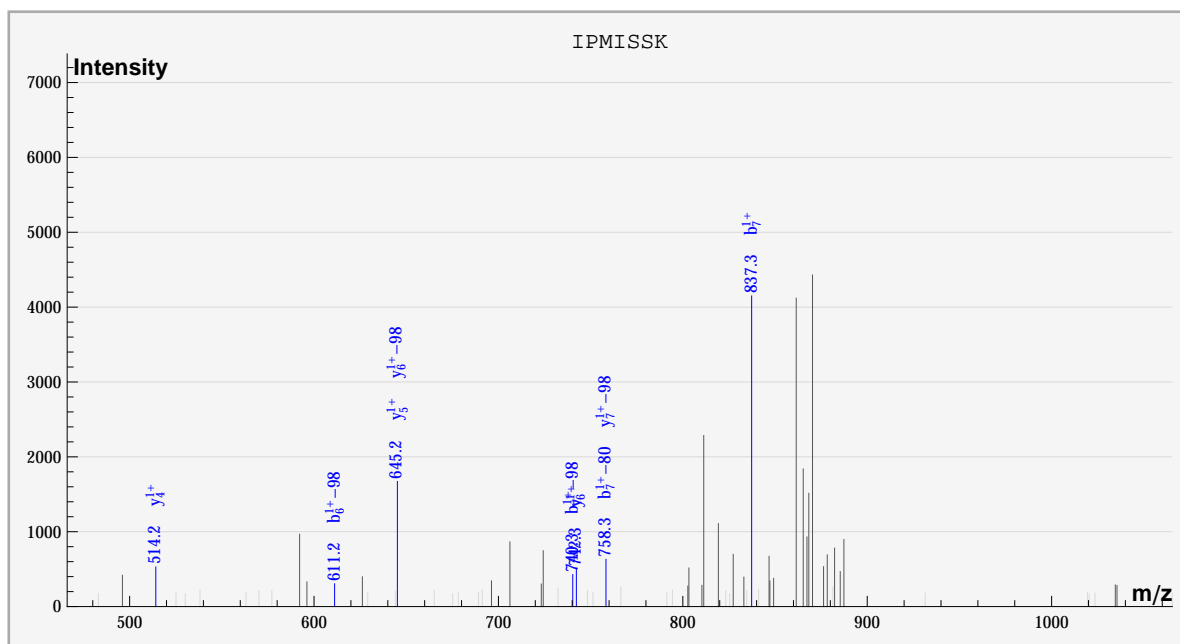

|   | # | b | b* | # | y | y* | P | P* |
|---|---|---|----|---|---|----|---|----|
| I | 1 |   |    |   |   |    |   | ✓  |
| P | 2 |   |    | 6 | ✓ | ✓  |   |    |
| M | 3 |   |    | 5 | ✓ |    |   |    |
| I | 4 |   |    | 4 | ✓ |    |   |    |
| S | 5 |   |    | 3 |   |    |   |    |
| S | 6 |   | ✓  | 2 |   |    |   |    |
| K | 7 | ✓ | ✓  | 1 |   |    |   |    |

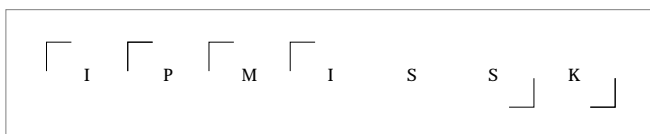

dbValid true KIDLTKEVNYYHR PHOS(1) 2. 857. -1.57785 5.09267 100. ? 3504.  
 S\_Acido\_new%gi|68567993|gb|AA80922.1| KIDLTKEVNYYHR%.....PHOS::%sample\_2%compd\_1910

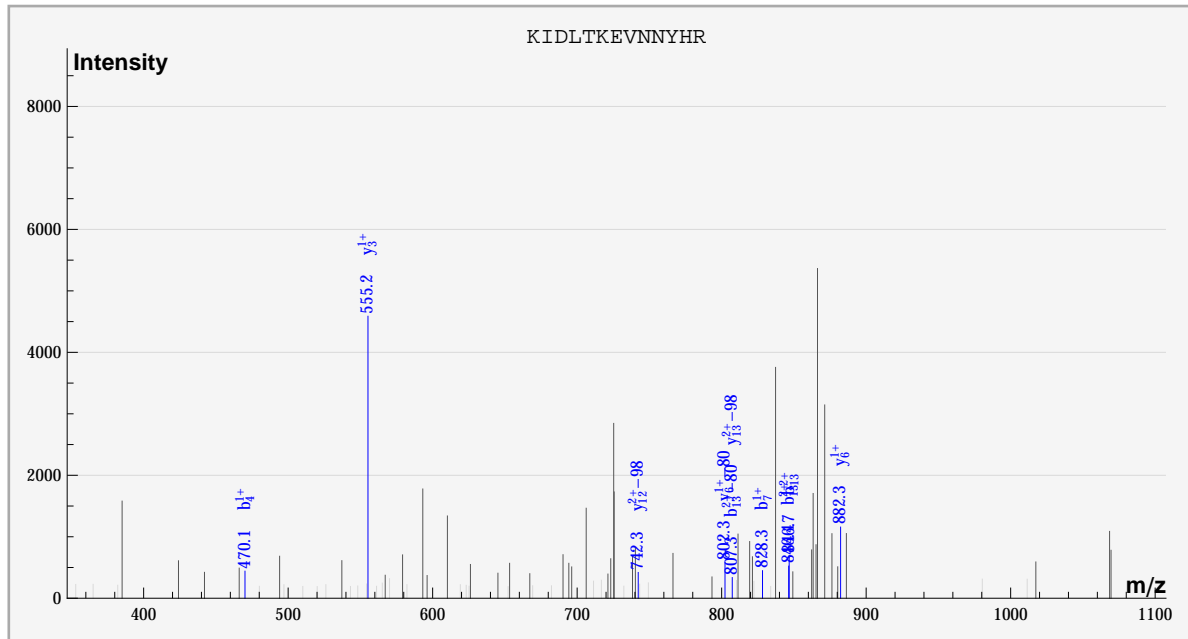

|   | #  | b | b* | #  | y | y* | P | P* |
|---|----|---|----|----|---|----|---|----|
| K | 1  |   |    |    |   |    |   | ✓  |
| I | 2  |   |    | 12 |   | ✓  |   |    |
| D | 3  |   |    | 11 |   |    |   |    |
| L | 4  | ✓ |    | 10 |   |    |   |    |
| T | 5  |   |    | 9  |   |    |   |    |
| K | 6  |   |    | 8  |   |    |   |    |
| E | 7  | ✓ |    | 7  |   |    |   |    |
| V | 8  |   |    | 6  | ✓ | ✓  |   |    |
| N | 9  |   |    | 5  |   |    |   |    |
| N | 10 |   |    | 4  |   |    |   |    |
| Y | 11 |   |    | 3  | ✓ |    |   |    |
| H | 12 |   |    | 2  |   |    |   |    |
| R | 13 | ✓ | ✓  | 1  |   |    |   |    |

「 K 「 I D L 」 T K E 」 V N N 「 Y H R 」

dbValid true EYTKLAITYSRK PHOS(3) 2. 857.76 -0.901533 5.30517 100. ? 2172.  
 S\_Acido\_new%gi|68566534|gb|AA79463.1| EYTKLAITYSRK%::PHOS:PHOS:::::PHOS:::::sample\_1%compd\_831

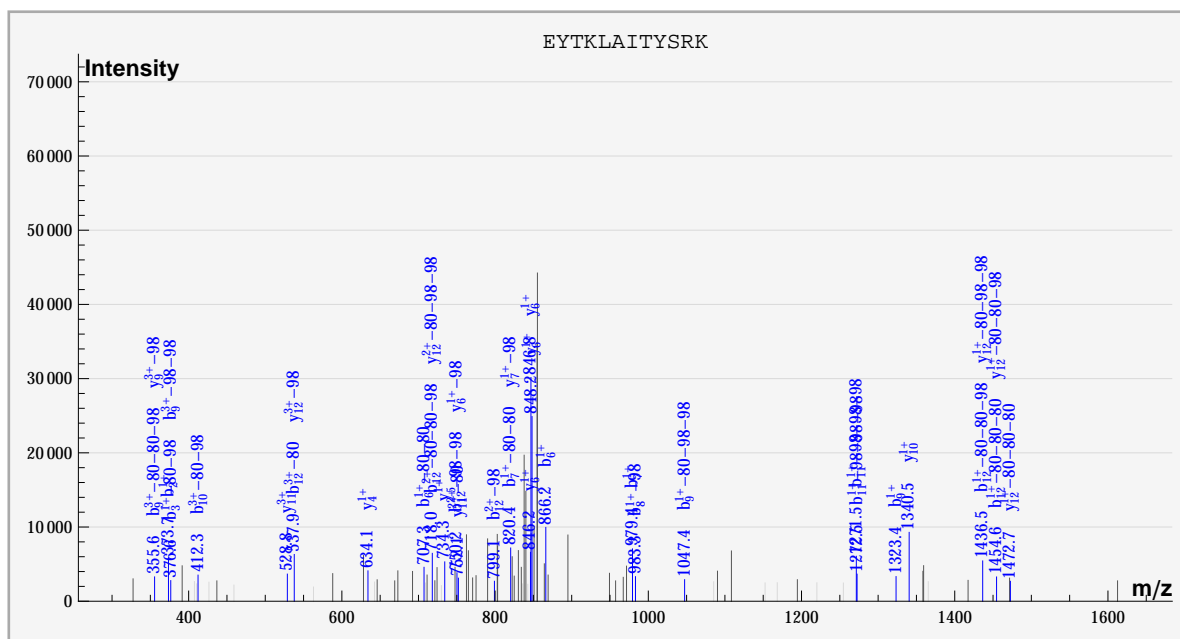

|   | #  | b | b* | #  | y | y* | P | P* |
|---|----|---|----|----|---|----|---|----|
| E | 1  |   |    |    |   |    |   | ✓  |
| Y | 2  | ✓ |    | 11 | ✓ | ✓  |   |    |
| T | 3  |   | ✓  | 10 | ✓ |    |   |    |
| K | 4  |   |    | 9  |   | ✓  |   |    |
| L | 5  |   |    | 8  |   |    |   |    |
| A | 6  | ✓ | ✓  | 7  |   | ✓  |   |    |
| I | 7  | ✓ | ✓  | 6  | ✓ | ✓  |   |    |
| T | 8  |   | ✓  | 5  | ✓ |    |   |    |
| Y | 9  | ✓ | ✓  | 4  | ✓ |    |   |    |
| S | 10 |   | ✓  | 3  |   |    |   |    |
| R | 11 |   | ✓  | 2  |   |    |   |    |
| K | 12 |   | ✓  | 1  |   |    |   |    |

E Y T K L A I T Y S R K

dbValid true VNKEGYSLTDSGKR PHOS(2) 2. 858. -0.634158 5.14615 100. ? 2988.  
 S\_Acido\_new%gi|68568170|gb|AA81099.1| VNKEGYSLTDSGKR%:::PHOS::PHOS:::sample\_2%compd\_1593

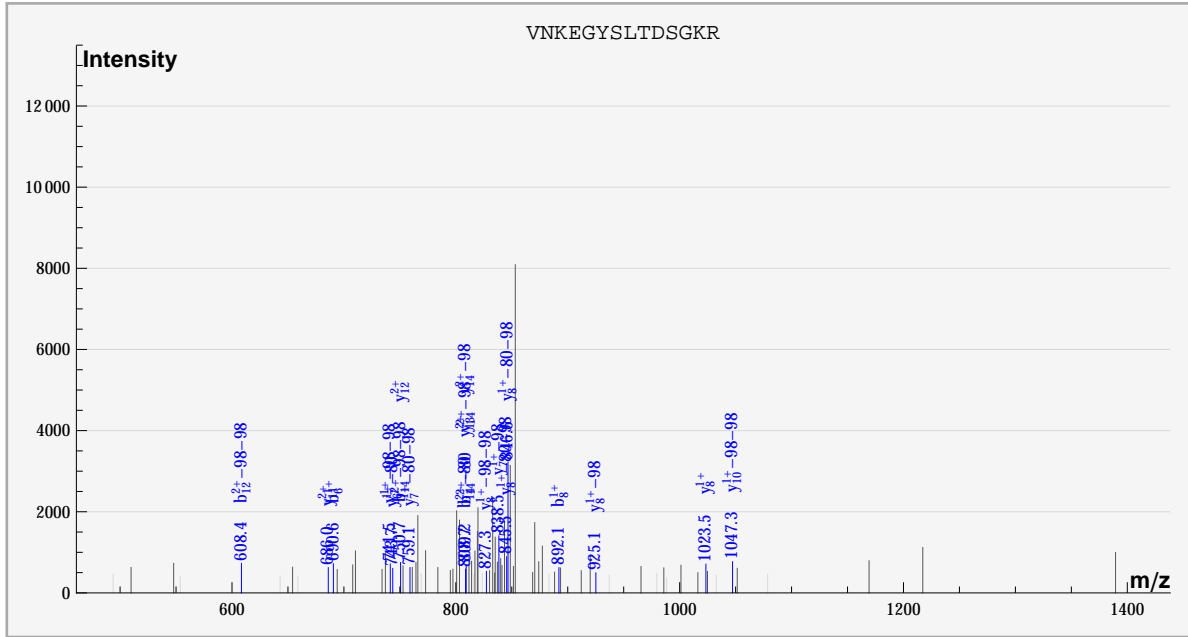

|   | #  | b | b* | #  | y | y* | P | P* |
|---|----|---|----|----|---|----|---|----|
| V | 1  |   |    |    |   |    |   | ✓  |
| N | 2  |   |    | 13 | ✓ |    |   |    |
| K | 3  |   |    | 12 | ✓ |    |   |    |
| E | 4  |   |    | 11 | ✓ |    |   |    |
| G | 5  |   |    | 10 |   | ✓  |   |    |
| Y | 6  | ✓ |    | 9  |   |    |   |    |
| S | 7  |   |    | 8  | ✓ | ✓  |   |    |
| L | 8  | ✓ |    | 7  |   | ✓  |   |    |
| T | 9  |   |    | 6  |   | ✓  |   |    |
| D | 10 |   |    | 5  |   |    |   |    |
| S | 11 |   |    | 4  |   |    |   |    |
| G | 12 |   | ✓  | 3  |   |    |   |    |
| K | 13 |   |    | 2  |   |    |   |    |
| R | 14 |   | ✓  | 1  |   |    |   |    |

V N K E G Y S L T D S G K R

dbValid true VFYNSF PHOS(1) 1. 858. -1.67233 5.0363 100. ? 3198.  
 S\_Acido\_new%gi|68567539|gb|AAY80468.1| VFYNSF%:::PHOS:::%sample\_2%cmpd\_1780

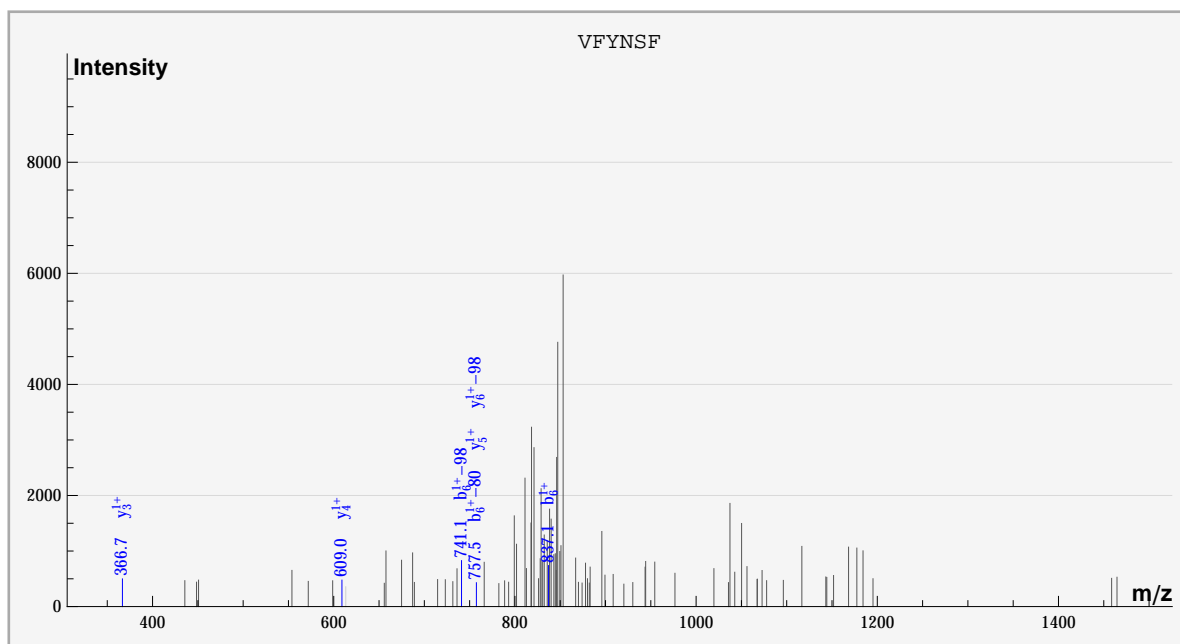

|   | # | b | b* | # | y | y* | P | P* |
|---|---|---|----|---|---|----|---|----|
| V | 1 |   |    |   |   |    |   | ✓  |
| F | 2 |   |    | 5 | ✓ |    |   |    |
| Y | 3 |   |    | 4 | ✓ |    |   |    |
| N | 4 |   |    | 3 | ✓ |    |   |    |
| S | 5 |   |    | 2 |   |    |   |    |
| F | 6 | ✓ | ✓  | 1 |   |    |   |    |

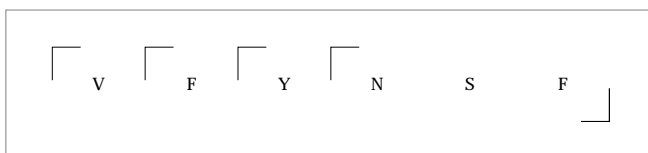



dbValid true EYLVNAQQVCRK Cys\_CAM(1),PHOS(1) 2. 858. 0.418557 5.18261 100. ? 3492.  
 S\_Acido\_new%gil68566964|gb|AAY79893.1| EYLVNAQQVCRK%::PHOS:::Cys\_CAM:::sample\_3%cmpd\_1839

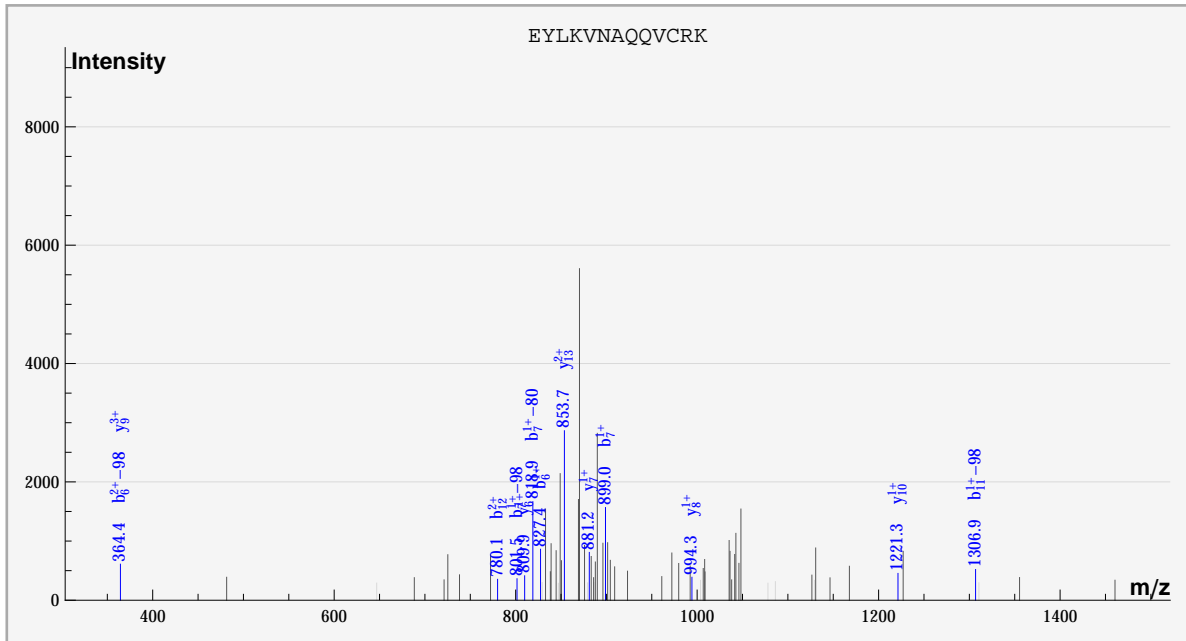

|   | #  | b | b* | #  | y | y* | P | P* |
|---|----|---|----|----|---|----|---|----|
| E | 1  |   |    |    |   |    |   | ✓  |
| Y | 2  |   |    | 12 |   |    |   |    |
| L | 3  |   |    | 11 |   |    |   |    |
| K | 4  |   |    | 10 | ✓ |    |   |    |
| V | 5  |   |    | 9  | ✓ |    |   |    |
| N | 6  | ✓ | ✓  | 8  | ✓ |    |   |    |
| A | 7  | ✓ | ✓  | 7  | ✓ |    |   |    |
| Q | 8  |   |    | 6  | ✓ |    |   |    |
| Q | 9  |   |    | 5  |   |    |   |    |
| V | 10 |   |    | 4  |   |    |   |    |
| C | 11 |   | ✓  | 3  |   |    |   |    |
| R | 12 | ✓ |    | 2  |   |    |   |    |
| K | 13 |   |    | 1  |   |    |   |    |

E Y L K V N A Q Q V C R K

dbValid true TWLMYKANLSYELTNNYINK Oxidation\_M(1),PHOS(1) 3.  
 859. 0.0694582 5.46767 100. ? 2334. S\_Acido\_new%g|68567318|gb|AAAY80247.1|  
 TWLMYKANLSYELTNNYINK%:PHOS:::Oxidation\_M:::.....%sample\_2%compd\_927

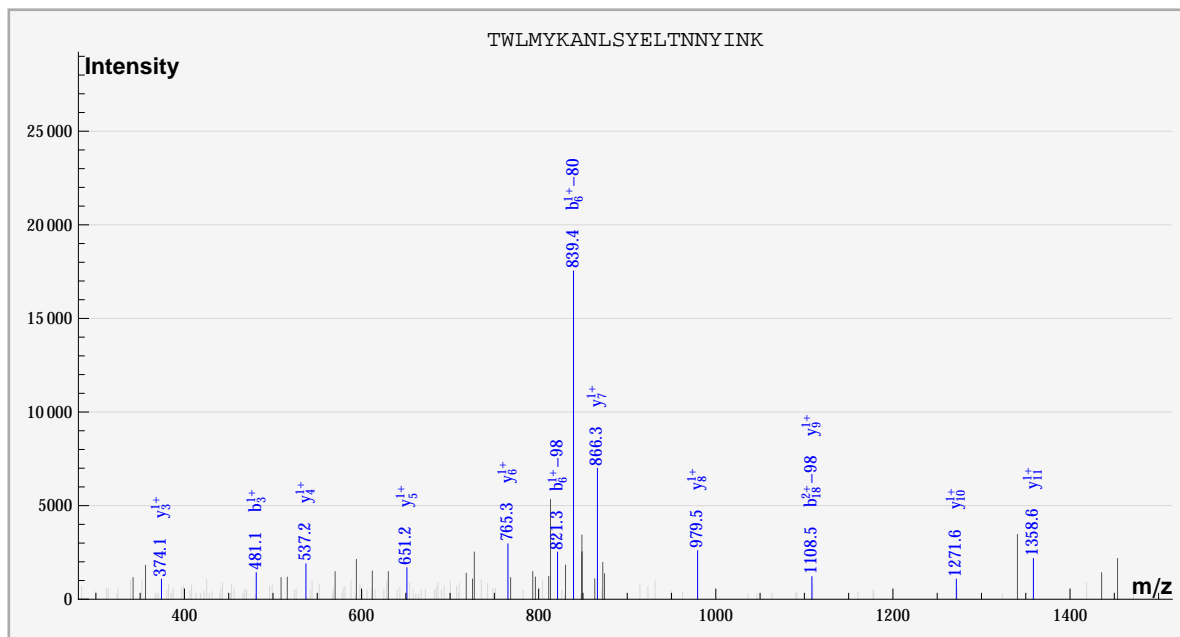

|   | #  | b | b* | #  | y | y* | P | P* |
|---|----|---|----|----|---|----|---|----|
| T | 1  |   |    |    |   |    |   |    |
| W | 2  |   |    | 19 |   |    |   |    |
| L | 3  | ✓ |    | 18 |   |    |   |    |
| M | 4  |   |    | 17 |   |    |   |    |
| Y | 5  |   |    | 16 |   |    |   |    |
| K | 6  |   | ✓  | 15 |   |    |   |    |
| A | 7  |   |    | 14 |   |    |   |    |
| N | 8  |   |    | 13 |   |    |   |    |
| L | 9  |   |    | 12 |   |    |   |    |
| S | 10 |   |    | 11 | ✓ |    |   |    |
| Y | 11 |   |    | 10 | ✓ |    |   |    |
| E | 12 |   |    | 9  | ✓ |    |   |    |
| L | 13 |   |    | 8  | ✓ |    |   |    |
| T | 14 |   |    | 7  | ✓ |    |   |    |
| N | 15 |   |    | 6  | ✓ |    |   |    |
| N | 16 |   |    | 5  | ✓ |    |   |    |
| Y | 17 |   |    | 4  | ✓ |    |   |    |
| I | 18 | ✓ |    | 3  | ✓ |    |   |    |
| N | 19 |   |    | 2  |   |    |   |    |
| K | 20 |   |    | 1  |   |    |   |    |

T W L<sub>Y</sub> M Y K<sub>Y</sub> A N L<sub>S</sub> Y<sub>E</sub> L<sub>T</sub> N<sub>N</sub> Y<sub>I</sub> N K

dbValid true YVSVNLSLEEGLRR PHOS(1) 2. 859. -1.07019 5.26457 100. ? 2346.  
 S\_Acido\_new%gi|68568082|gb|AAY81011.1| YVSVNLSLEEGLRR%:PHOS:::sample\_2%compd\_1008

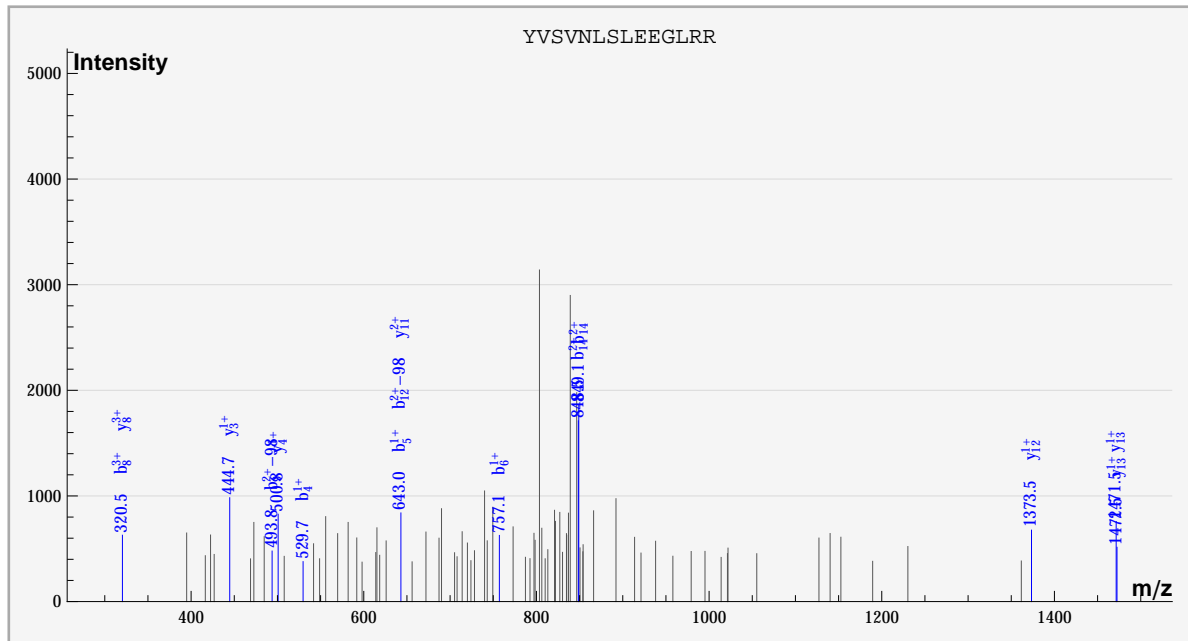

|   | #  | b | b* | #  | y | y* | P | P* |
|---|----|---|----|----|---|----|---|----|
| Y | 1  |   |    |    |   |    |   |    |
| V | 2  |   |    | 13 | ✓ |    |   |    |
| S | 3  |   |    | 12 | ✓ |    |   |    |
| V | 4  | ✓ |    | 11 | ✓ |    |   |    |
| N | 5  | ✓ |    | 10 |   |    |   |    |
| L | 6  | ✓ |    | 9  |   |    |   |    |
| S | 7  |   |    | 8  | ✓ |    |   |    |
| L | 8  | ✓ |    | 7  |   |    |   |    |
| E | 9  |   | ✓  | 6  |   |    |   |    |
| E | 10 |   |    | 5  |   |    |   |    |
| G | 11 |   |    | 4  | ✓ |    |   |    |
| L | 12 |   | ✓  | 3  | ✓ |    |   |    |
| R | 13 |   |    | 2  |   |    |   |    |
| R | 14 | ✓ |    | 1  |   |    |   |    |

Y V S V N L S L E E G L R R

dbValid true TWLMYKANLSYELTNNYINK Oxidation\_M(1),PHOS(1) 3.  
 859. 0.0694582 5.30378 100. ? 2358. S\_Acido\_new%g|68567318|gb|AAAY80247.1|  
 TWLMYKANLSYELTNNYINK%:PHOS:::Oxidation\_M:.....:sample\_2%compd\_947

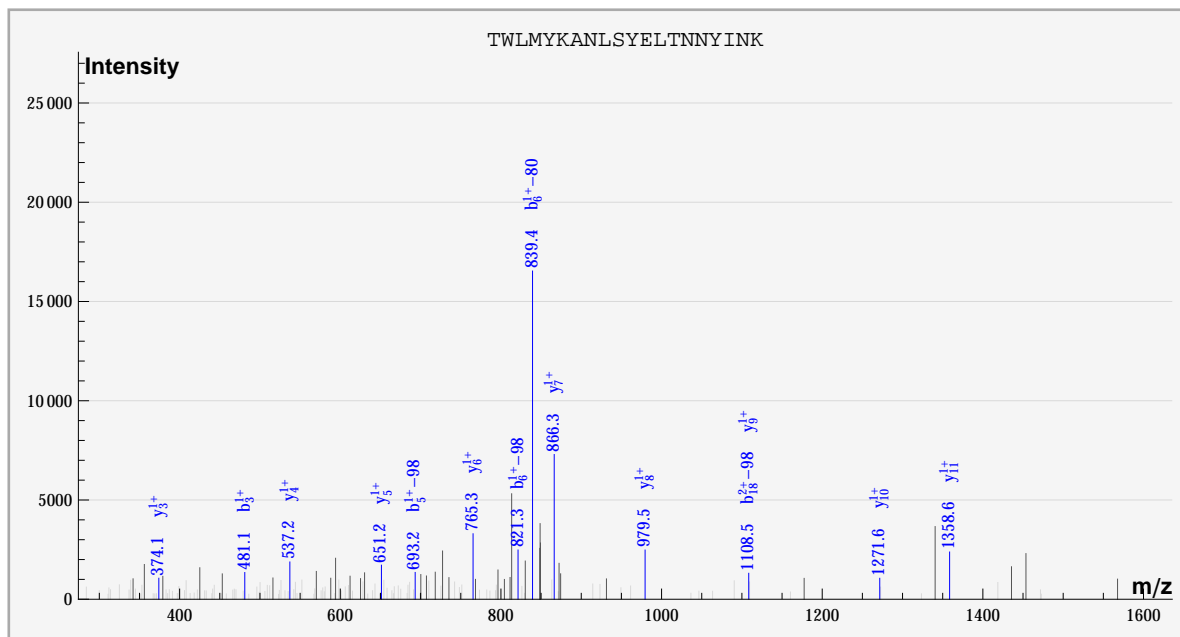

|   | #  | b | b* | #  | y | y* | P | P* |
|---|----|---|----|----|---|----|---|----|
| T | 1  |   |    |    |   |    |   |    |
| W | 2  |   |    | 19 |   |    |   |    |
| L | 3  | ✓ |    | 18 |   |    |   |    |
| M | 4  |   |    | 17 |   |    |   |    |
| Y | 5  |   | ✓  | 16 |   |    |   |    |
| K | 6  |   | ✓  | 15 |   |    |   |    |
| A | 7  |   |    | 14 |   |    |   |    |
| N | 8  |   |    | 13 |   |    |   |    |
| L | 9  |   |    | 12 |   |    |   |    |
| S | 10 |   |    | 11 | ✓ |    |   |    |
| Y | 11 |   |    | 10 | ✓ |    |   |    |
| E | 12 |   |    | 9  | ✓ |    |   |    |
| L | 13 |   |    | 8  | ✓ |    |   |    |
| T | 14 |   |    | 7  | ✓ |    |   |    |
| N | 15 |   |    | 6  | ✓ |    |   |    |
| N | 16 |   |    | 5  | ✓ |    |   |    |
| Y | 17 |   |    | 4  | ✓ |    |   |    |
| I | 18 | ✓ |    | 3  | ✓ |    |   |    |
| N | 19 |   |    | 2  |   |    |   |    |
| K | 20 |   |    | 1  |   |    |   |    |

T W L<sub>M</sub> Y<sub>K</sub> A N L<sub>S</sub> Y<sub>E</sub> L<sub>T</sub> N<sub>N</sub> Y<sub>I</sub> N K

dbValid true TWLMYKANLSYELTNNYINK Oxidation\_M(1),PHOS(1) 3.  
 859. 0.0694582 5.19677 100. ? 2382. S\_Acido\_new%g|68567318|gb|AAy80247.1|  
 TWLMYKANLSYELTNNYINK%:PHOS:::Oxidation\_M:.....:sample\_2%compd\_967

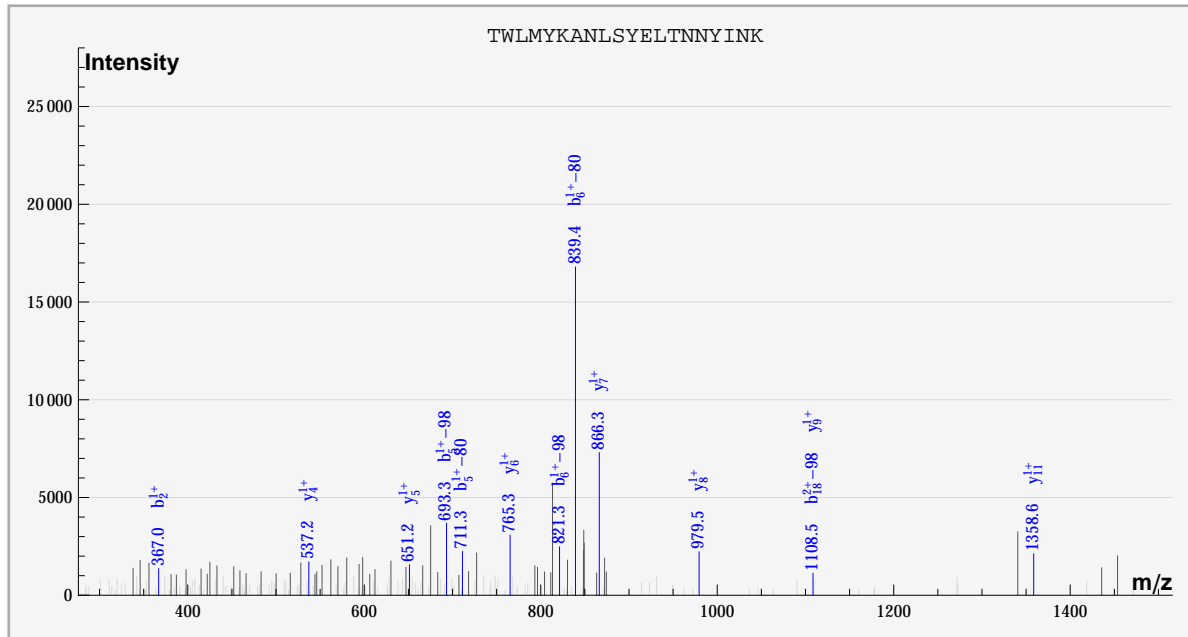

|   | #  | b | b* | #  | y | y* | P | P* |
|---|----|---|----|----|---|----|---|----|
| T | 1  |   |    |    |   |    |   |    |
| W | 2  | ✓ |    | 19 |   |    |   |    |
| L | 3  |   |    | 18 |   |    |   |    |
| M | 4  |   |    | 17 |   |    |   |    |
| Y | 5  |   | ✓  | 16 |   |    |   |    |
| K | 6  |   | ✓  | 15 |   |    |   |    |
| A | 7  |   |    | 14 |   |    |   |    |
| N | 8  |   |    | 13 |   |    |   |    |
| L | 9  |   |    | 12 |   |    |   |    |
| S | 10 |   |    | 11 | ✓ |    |   |    |
| Y | 11 |   |    | 10 |   |    |   |    |
| E | 12 |   |    | 9  | ✓ |    |   |    |
| L | 13 |   |    | 8  | ✓ |    |   |    |
| T | 14 |   |    | 7  | ✓ |    |   |    |
| N | 15 |   |    | 6  | ✓ |    |   |    |
| N | 16 |   |    | 5  | ✓ |    |   |    |
| Y | 17 |   |    | 4  | ✓ |    |   |    |
| I | 18 |   | ✓  | 3  |   |    |   |    |
| N | 19 |   |    | 2  |   |    |   |    |
| K | 20 |   |    | 1  |   |    |   |    |

T W<sub>2</sub> L M Y<sub>5</sub> K<sub>6</sub> A N L<sub>13</sub> S Y<sub>11</sub> E<sub>12</sub> L<sub>13</sub> T<sub>14</sub> N<sub>15</sub> N<sub>16</sub> Y<sub>17</sub> I<sub>18</sub> N K

dbValid true TWLMYKANLSYELTNNYINK Oxidation\_M(1),PHOS(1) 3.  
 859. 0.0694582 5.20097 100. ? 2430. S\_Acido\_new%g|68567318|gb|AAAY80247.1|  
 TWLMYKANLSYELTNNYINK%:PHOS:::Oxidation\_M:::.....:sample\_2%compd\_1009

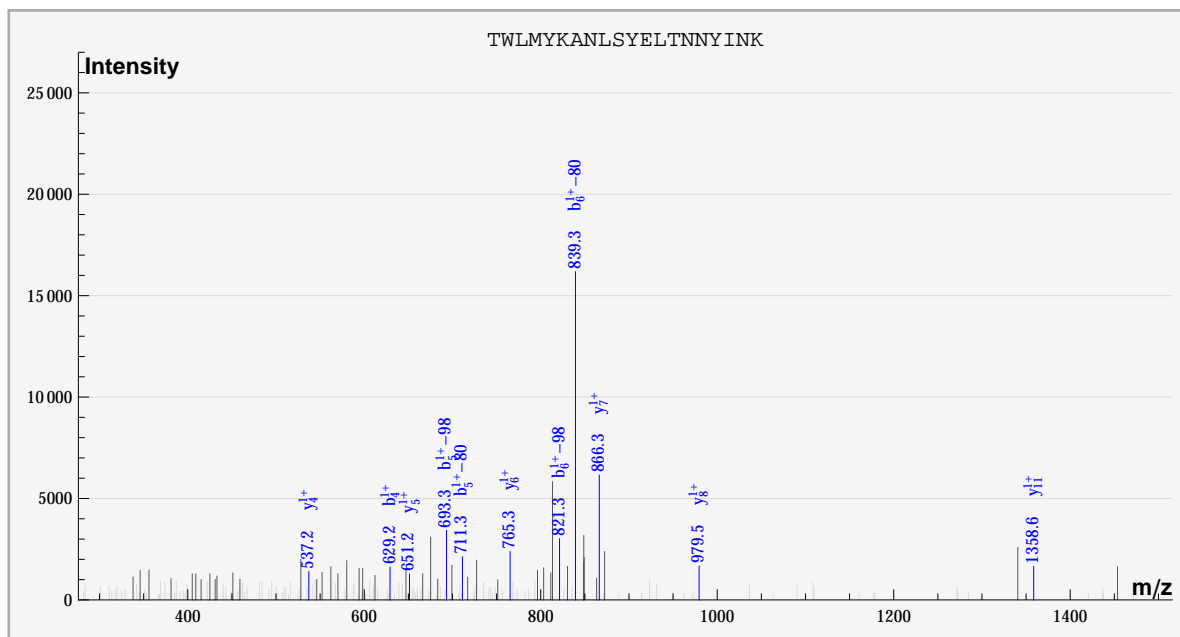

|   | #  | b | b* | #  | y | y* | P | P* |
|---|----|---|----|----|---|----|---|----|
| T | 1  |   |    |    |   |    |   |    |
| W | 2  |   |    | 19 |   |    |   |    |
| L | 3  |   |    | 18 |   |    |   |    |
| M | 4  | ✓ |    | 17 |   |    |   |    |
| Y | 5  |   | ✓  | 16 |   |    |   |    |
| K | 6  |   | ✓  | 15 |   |    |   |    |
| A | 7  |   |    | 14 |   |    |   |    |
| N | 8  |   |    | 13 |   |    |   |    |
| L | 9  |   |    | 12 |   |    |   |    |
| S | 10 |   |    | 11 | ✓ |    |   |    |
| Y | 11 |   |    | 10 |   |    |   |    |
| E | 12 |   |    | 9  |   |    |   |    |
| L | 13 |   |    | 8  | ✓ |    |   |    |
| T | 14 |   |    | 7  | ✓ |    |   |    |
| N | 15 |   |    | 6  | ✓ |    |   |    |
| N | 16 |   |    | 5  | ✓ |    |   |    |
| Y | 17 |   |    | 4  | ✓ |    |   |    |
| I | 18 |   |    | 3  |   |    |   |    |
| N | 19 |   |    | 2  |   |    |   |    |
| K | 20 |   |    | 1  |   |    |   |    |

T W L M Y K A N L S Y E L T N N Y I N K

dbValid true MIDISGK Oxidation\_M(1),PHOS(1) 1. 861. -1.63695 5.28119 100. ? 2736.  
 S\_Acido\_new%gil68567339|gb|AAY80268.1| MIDISGK%:Oxidation\_M:::PHOS:::%sample\_3%compd\_1166

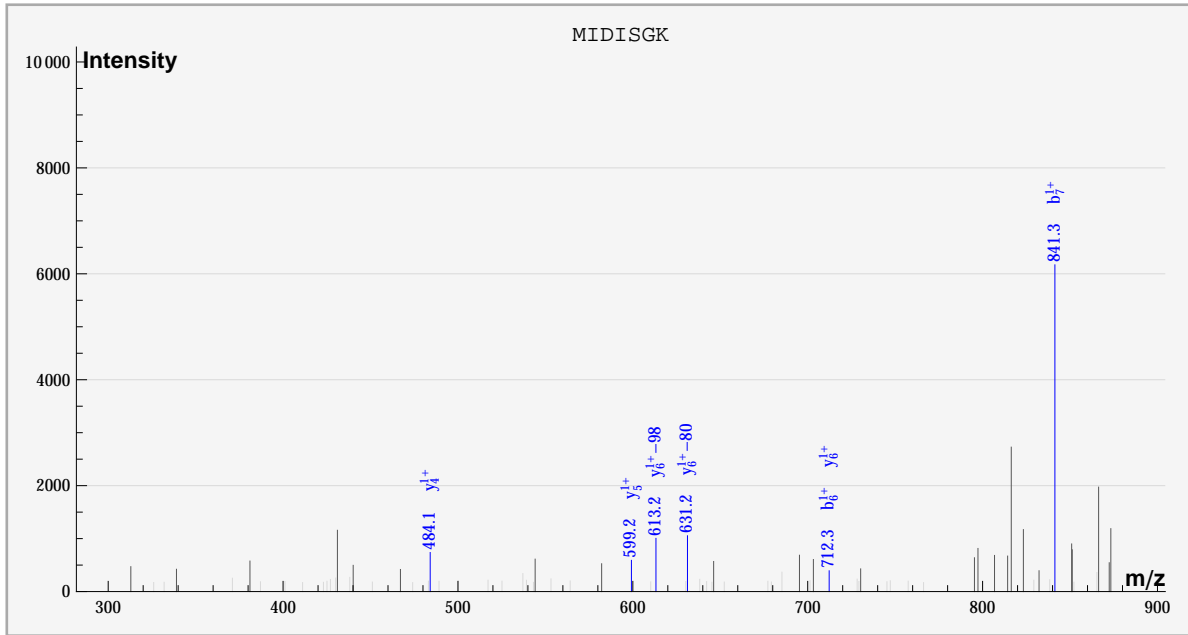

|   | # | b | b* | # | y | y* | P | P* |
|---|---|---|----|---|---|----|---|----|
| M | 1 |   |    |   |   |    |   |    |
| I | 2 |   |    | 6 | ✓ | ✓  |   |    |
| D | 3 |   |    | 5 | ✓ |    |   |    |
| I | 4 |   |    | 4 | ✓ |    |   |    |
| S | 5 |   |    | 3 |   |    |   |    |
| G | 6 | ✓ |    | 2 |   |    |   |    |
| K | 7 | ✓ |    | 1 |   |    |   |    |

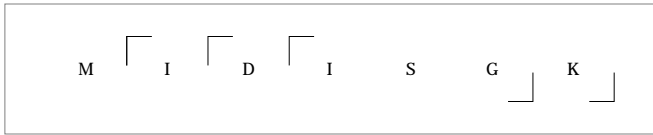

dbValid true KVFTNYGSGISYAR PHOS(2) 2. 862. -0.131978 6.13465 100. ? 2064.  
 S\_Acido\_new%gi|68567291|gb|AAy80220.1| KVFTNYGSGISYAR%:::PHOS:::PHOS:::sample\_3%compd\_738

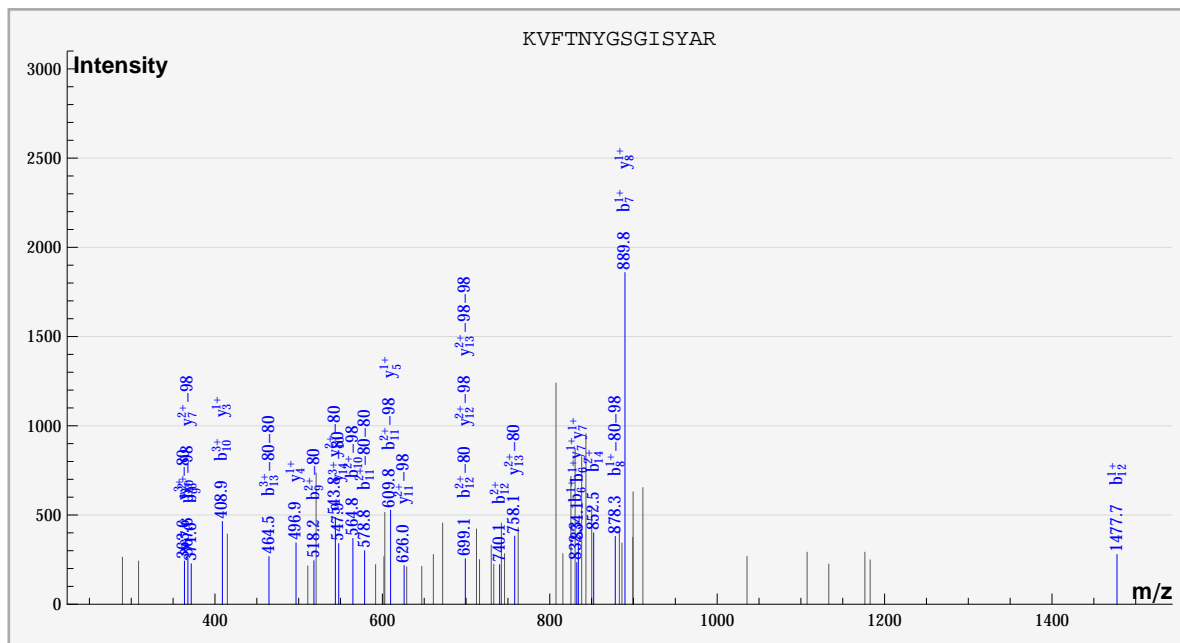

|   | #  | b | b* | #  | y | y* | P | P* |
|---|----|---|----|----|---|----|---|----|
| K | 1  |   |    |    |   |    |   | ✓  |
| V | 2  |   |    | 13 |   |    |   | ✓  |
| F | 3  |   |    | 12 |   |    |   | ✓  |
| T | 4  |   |    | 11 |   |    |   | ✓  |
| N | 5  |   |    | 10 |   |    |   | ✓  |
| Y | 6  | ✓ | ✓  | 9  |   |    |   |    |
| G | 7  | ✓ |    | 8  | ✓ |    |   |    |
| S | 8  |   | ✓  | 7  | ✓ | ✓  |   |    |
| G | 9  | ✓ | ✓  | 6  |   |    |   |    |
| I | 10 | ✓ | ✓  | 5  | ✓ |    |   |    |
| S | 11 | ✓ | ✓  | 4  | ✓ |    |   |    |
| Y | 12 | ✓ | ✓  | 3  | ✓ |    |   |    |
| A | 13 |   | ✓  | 2  |   |    |   |    |
| R | 14 | ✓ |    | 1  |   |    |   |    |

[K][V][F][T][N][Y][G][S][G][I][S][Y][A][R]



dbValid true RTMELYTETTR PHOS(4) 2. 862. -1.22183 5.42725 100. ? 2316.

S\_Acido\_new%gi|68567341|gb|AAy80270.1| RTMELYTETTR%::PHOS:::PHOS::PHOS::%sample\_3%compd\_970

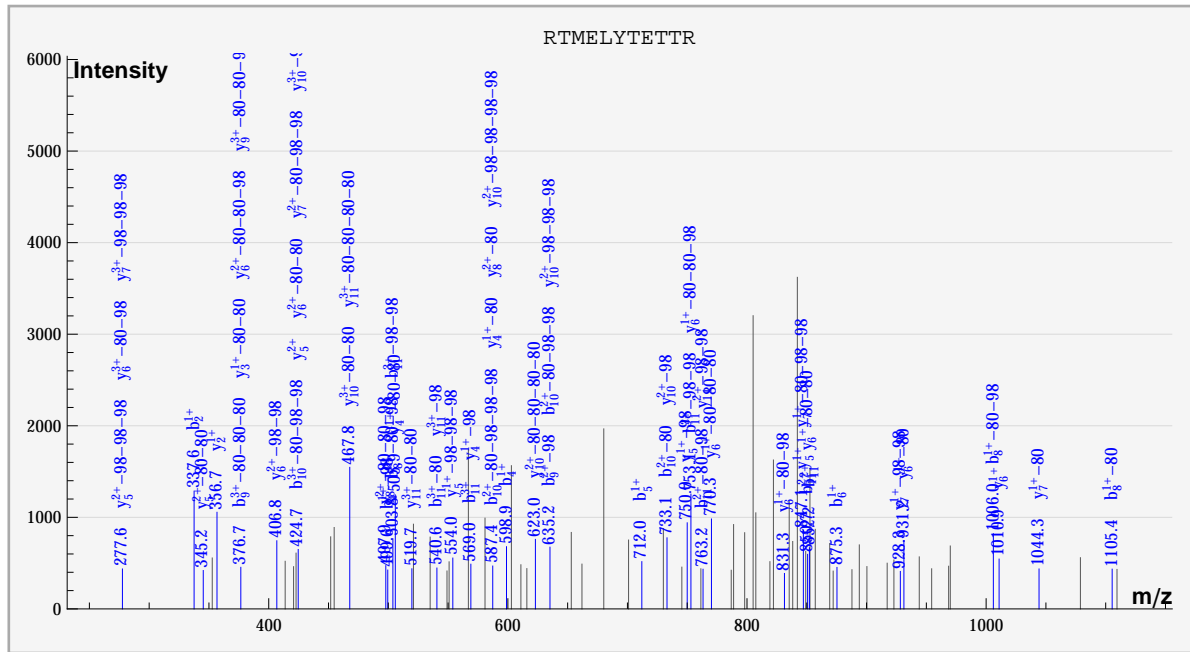

|   | #  | b | b* | #  | y | y* | P | P* |
|---|----|---|----|----|---|----|---|----|
| R | 1  |   |    |    |   |    |   | ✓  |
| T | 2  | ✓ |    | 10 |   | ✓  |   |    |
| M | 3  |   |    | 9  |   | ✓  |   |    |
| E | 4  | ✓ | ✓  | 8  |   | ✓  |   |    |
| L | 5  | ✓ |    | 7  |   | ✓  |   |    |
| Y | 6  | ✓ |    | 6  | ✓ | ✓  |   |    |
| T | 7  |   |    | 5  | ✓ | ✓  |   |    |
| E | 8  |   | ✓  | 4  | ✓ | ✓  |   |    |
| T | 9  |   | ✓  | 3  |   | ✓  |   |    |
| T | 10 |   | ✓  | 2  | ✓ |    |   |    |
| R | 11 | ✓ | ✓  | 1  |   |    |   |    |

RTMELYTETTR

dbValid true YLRNNNIEDRTR PHOS(2) 2. 862. 0.369257 5.1304 100. ? 3150.  
 S\_Acido\_new%gi|68568405|gb|AAy81334.1| YLRNNNIEDRTR%:PHOS:.....PHOS::%sample\_3%compd\_1496

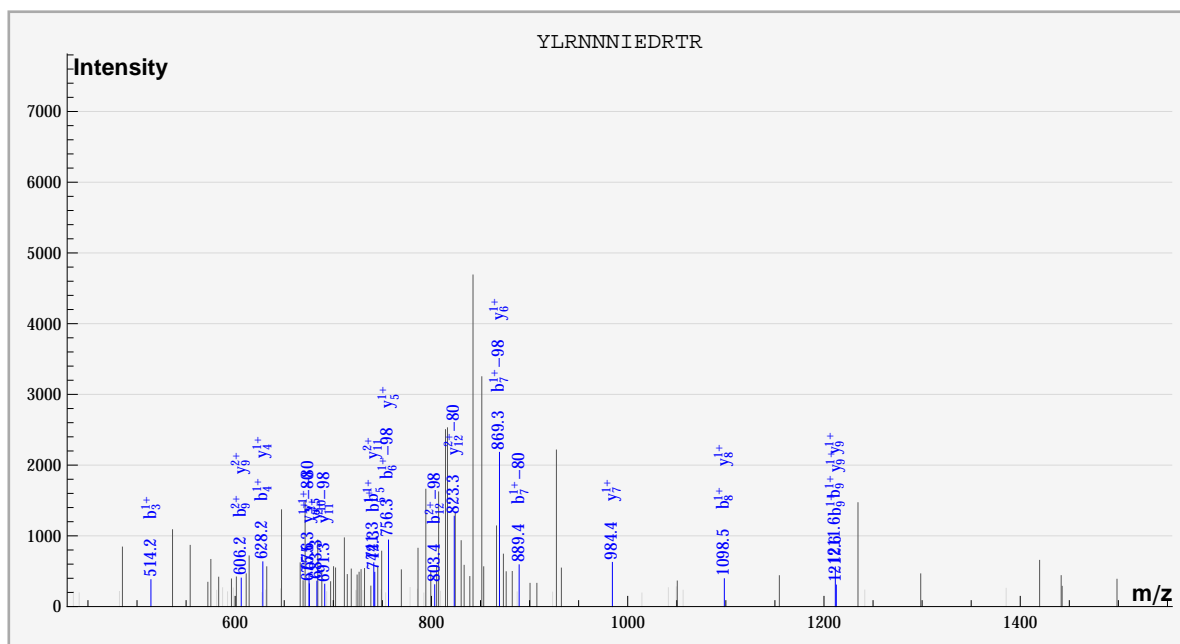

|   | #  | b | b* | #  | y | y* | P | P* |
|---|----|---|----|----|---|----|---|----|
| Y | 1  |   |    |    |   |    |   | ✓  |
| L | 2  |   |    | 11 | ✓ | ✓  |   |    |
| R | 3  | ✓ |    | 10 | ✓ |    |   |    |
| N | 4  | ✓ |    | 9  | ✓ |    |   |    |
| N | 5  | ✓ |    | 8  | ✓ |    |   |    |
| N | 6  |   | ✓  | 7  | ✓ |    |   |    |
| I | 7  |   | ✓  | 6  | ✓ |    |   |    |
| E | 8  | ✓ |    | 5  | ✓ | ✓  |   |    |
| D | 9  | ✓ |    | 4  | ✓ |    |   |    |
| R | 10 |   |    | 3  |   |    |   |    |
| T | 11 |   |    | 2  |   |    |   |    |
| R | 12 |   | ✓  | 1  |   |    |   |    |

Y L R N N N I E D R T R

dbValid true KYITEK PHOS(1) 1. 863. -1.58827 5.1007 100. ? 1776.  
 S\_Acido\_new%gi68567959|gb|AAY80888.1| KYITEK%::PHOS:::%sample\_3%cmpd\_412

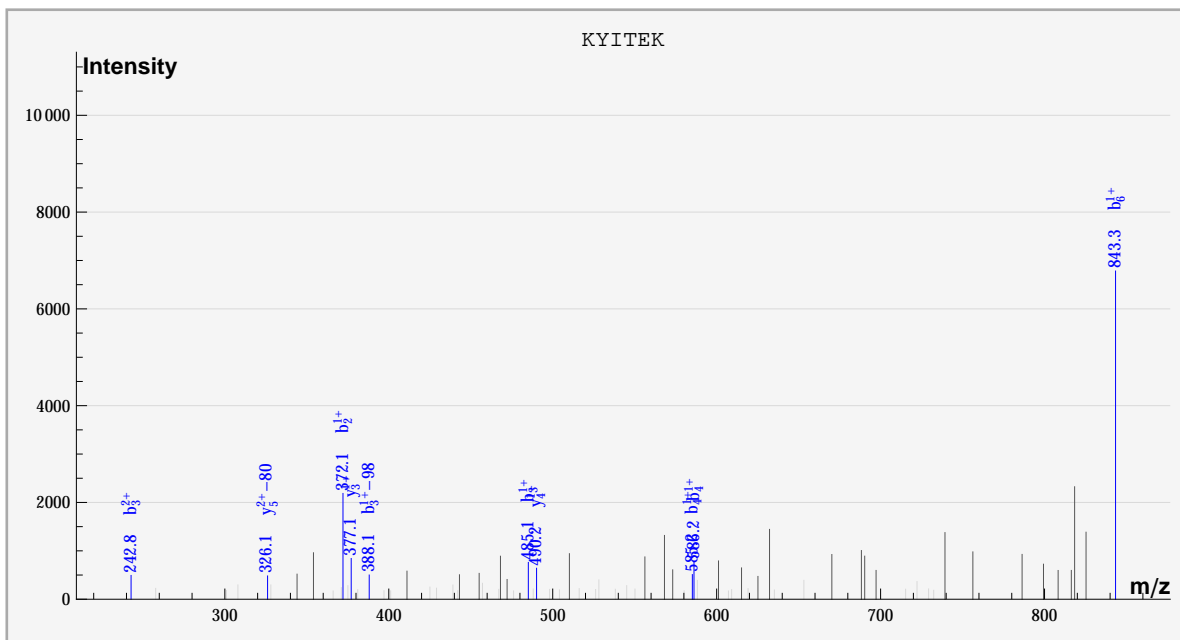

|   | # | b | b* | # | y | y* | P | P* |
|---|---|---|----|---|---|----|---|----|
| K | 1 |   |    |   |   |    |   |    |
| Y | 2 | ✓ |    | 5 |   | ✓  |   |    |
| I | 3 | ✓ | ✓  | 4 | ✓ |    |   |    |
| T | 4 | ✓ |    | 3 | ✓ |    |   |    |
| E | 5 |   |    | 2 |   |    |   |    |
| K | 6 | ✓ |    | 1 |   |    |   |    |

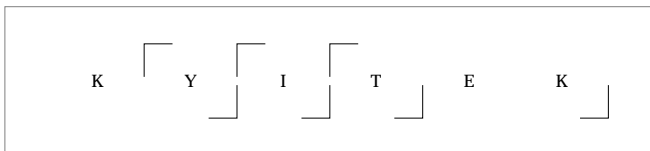

dbValid true KTIYIKLSEEEYK PHOS(1) 2. 863. -0.568683 5.25985 100. ? 2046.  
 S\_Acido\_new%gi|68567231|gb|AAY80160.1| KTIYIKLSEEEYK%::::::PHOS::::::%sample\_3%compd\_614

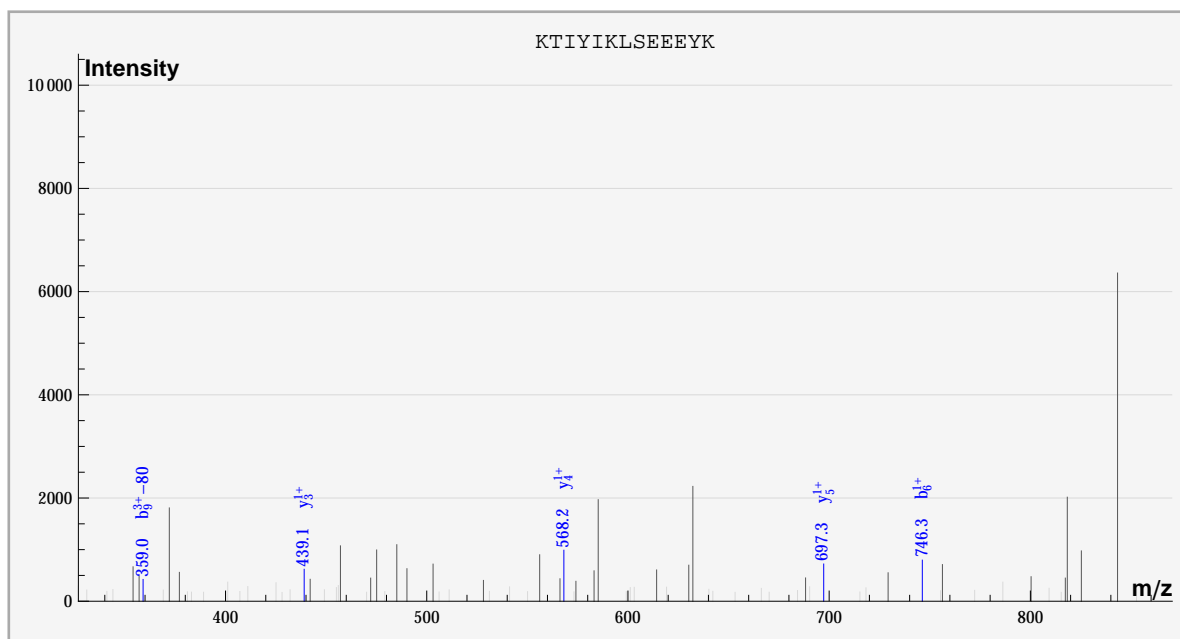

|   | #  | b | b* | #  | y | y* | P | P* |
|---|----|---|----|----|---|----|---|----|
| K | 1  |   |    |    |   |    |   |    |
| T | 2  |   |    | 12 |   |    |   |    |
| I | 3  |   |    | 11 |   |    |   |    |
| Y | 4  |   |    | 10 |   |    |   |    |
| I | 5  |   |    | 9  |   |    |   |    |
| K | 6  | ✓ |    | 8  |   |    |   |    |
| L | 7  |   |    | 7  |   |    |   |    |
| S | 8  |   |    | 6  |   |    |   |    |
| E | 9  |   | ✓  | 5  | ✓ |    |   |    |
| E | 10 |   |    | 4  | ✓ |    |   |    |
| E | 11 |   |    | 3  | ✓ |    |   |    |
| Y | 12 |   |    | 2  |   |    |   |    |
| K | 13 |   |    | 1  |   |    |   |    |

K T I Y I K L S E E E Y K

dbValid true YLRNNNIEDRTR PHOS(2) 2. 863. -0.630743 5.39123 100. ? 2958.  
 S\_Acido\_new%gi|68568405|gb|AAy81334.1| YLRNNNIEDRTR%:PHOS:::PHOS::%sample\_3%compd\_1558

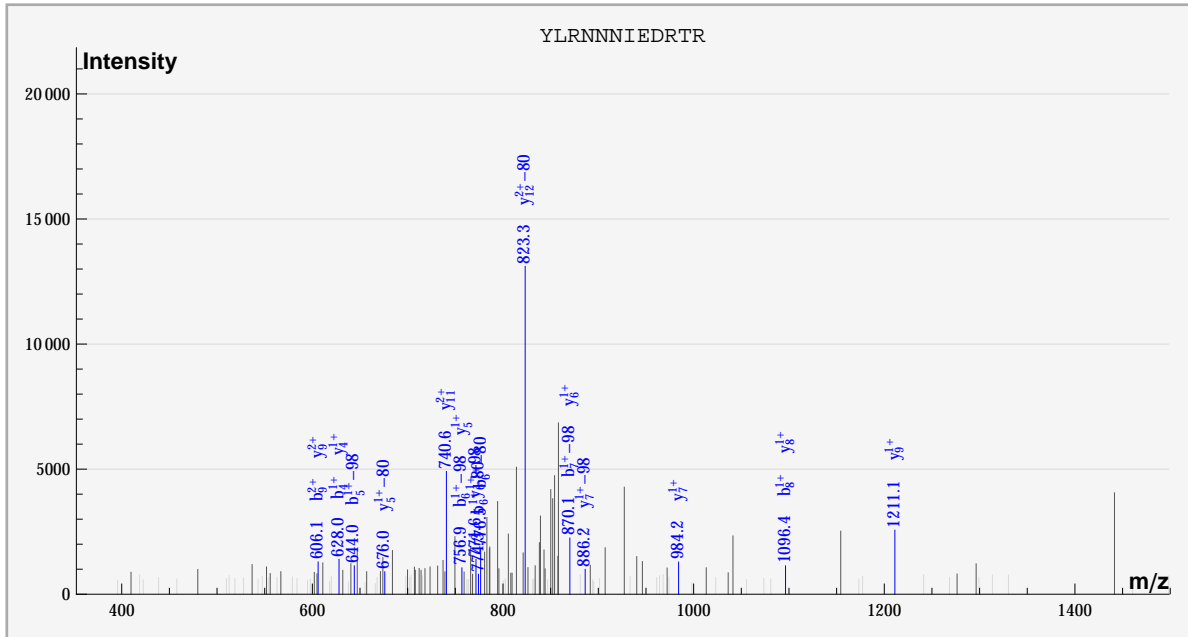

|   | #  | b | b* | #  | y | y* | P | P* |
|---|----|---|----|----|---|----|---|----|
| Y | 1  |   |    |    |   |    |   | ✓  |
| L | 2  |   |    | 11 | ✓ |    |   |    |
| R | 3  |   |    | 10 |   |    |   |    |
| N | 4  | ✓ |    | 9  | ✓ |    |   |    |
| N | 5  |   | ✓  | 8  | ✓ |    |   |    |
| N | 6  |   | ✓  | 7  | ✓ | ✓  |   |    |
| I | 7  |   | ✓  | 6  | ✓ | ✓  |   |    |
| E | 8  | ✓ |    | 5  | ✓ | ✓  |   |    |
| D | 9  | ✓ |    | 4  | ✓ |    |   |    |
| R | 10 |   |    | 3  |   |    |   |    |
| T | 11 |   |    | 2  |   |    |   |    |
| R | 12 |   |    | 1  |   |    |   |    |

Y L R N N N I E D R T R

dbValid true RYTVSVSANYISK PHOS(3) 2. 864. 0.345727 5.50645 100. ? 2862.  
 S\_Acido\_new%gi|68567901|gb|AA80830.1| RYTVSVSANYISK%:::PHOS:::PHOS::PHOS::%sample\_3%compd\_1470

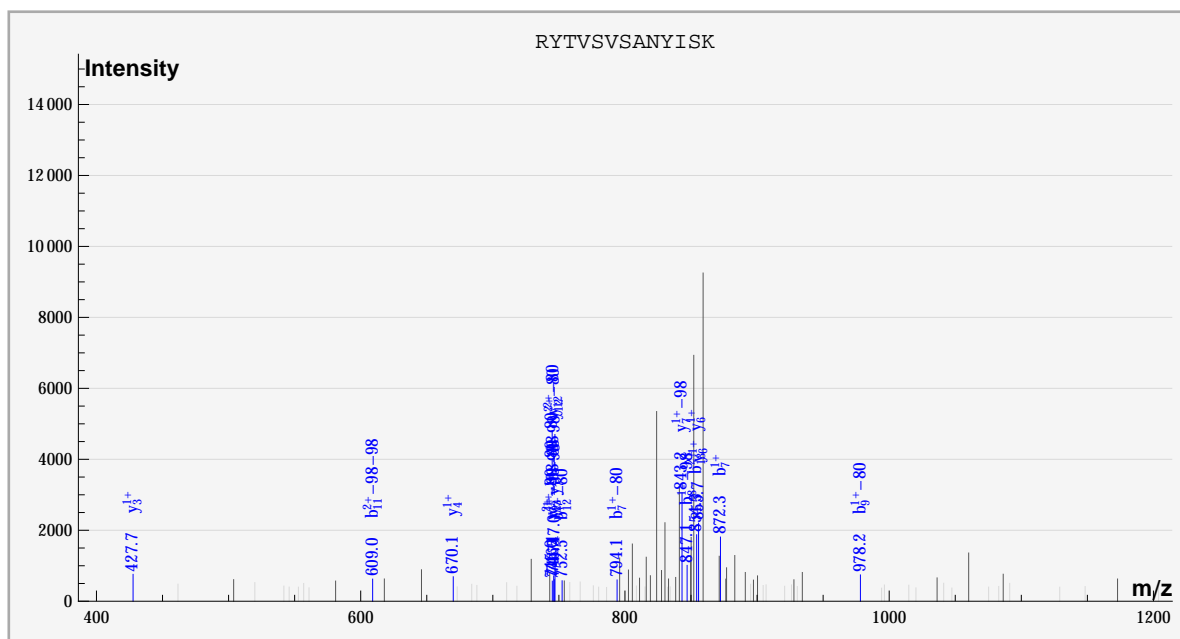

|   | #  | b | b* | #  | y | y* | P | P* |
|---|----|---|----|----|---|----|---|----|
| R | 1  |   |    |    |   |    |   | ✓  |
| Y | 2  |   |    | 12 |   | ✓  |   |    |
| T | 3  |   |    | 11 |   |    |   |    |
| V | 4  |   |    | 10 |   |    |   |    |
| S | 5  |   |    | 9  |   |    |   |    |
| V | 6  |   |    | 8  |   |    |   |    |
| S | 7  | ✓ | ✓  | 7  |   | ✓  |   |    |
| A | 8  |   | ✓  | 6  | ✓ |    |   |    |
| N | 9  |   | ✓  | 5  |   |    |   |    |
| Y | 10 |   |    | 4  | ✓ |    |   |    |
| I | 11 |   | ✓  | 3  | ✓ |    |   |    |
| S | 12 |   | ✓  | 2  |   |    |   |    |
| K | 13 | ✓ |    | 1  |   |    |   |    |

「 R 「 Y T V S V 「 S 「 A 」 N 「 Y 「 I 」 S 」 K 」

dbValid true GPRVIRS PHOS(1) 1. 864. 0.445095 5.44463 100. ? 3000.  
 S\_Acido\_new%gi|68567662|gb|AAY80591.1| GPRVIRS%:::PHOS%sample\_3%compd\_1592

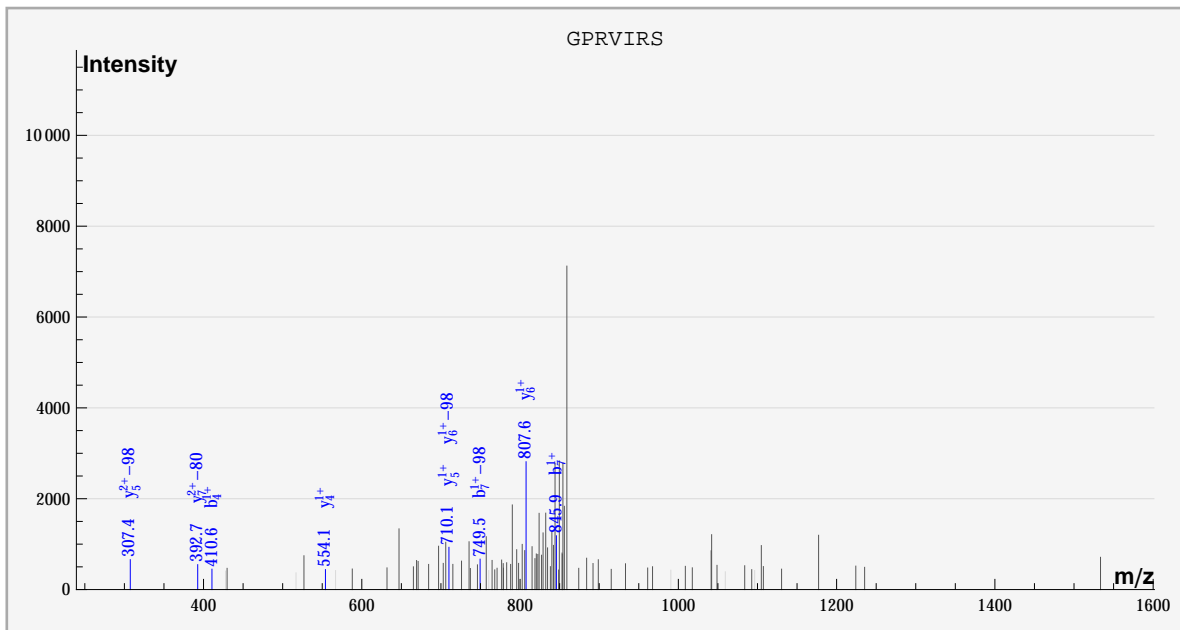

|   | # | b | b* | # | y | y* | P | P* |
|---|---|---|----|---|---|----|---|----|
| G | 1 |   |    |   |   |    |   | ✓  |
| P | 2 |   |    | 6 | ✓ | ✓  |   |    |
| R | 3 |   |    | 5 | ✓ | ✓  |   |    |
| V | 4 | ✓ |    | 4 | ✓ |    |   |    |
| I | 5 |   |    | 3 |   |    |   |    |
| R | 6 |   |    | 2 |   |    |   |    |
| S | 7 | ✓ | ✓  | 1 |   |    |   |    |

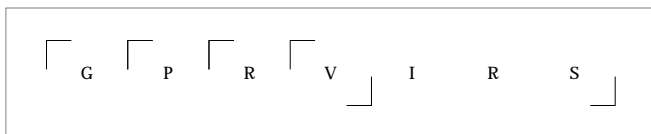

dbValid true GPRVIRS PHOS(1) 1. 866. -1.55491 5.31611 100. ? 2802.  
 S\_Acido\_new%gi|68567662|gb|AAY80591.1| GPRVIRS%:::PHOS:%sample\_3%compd\_1417

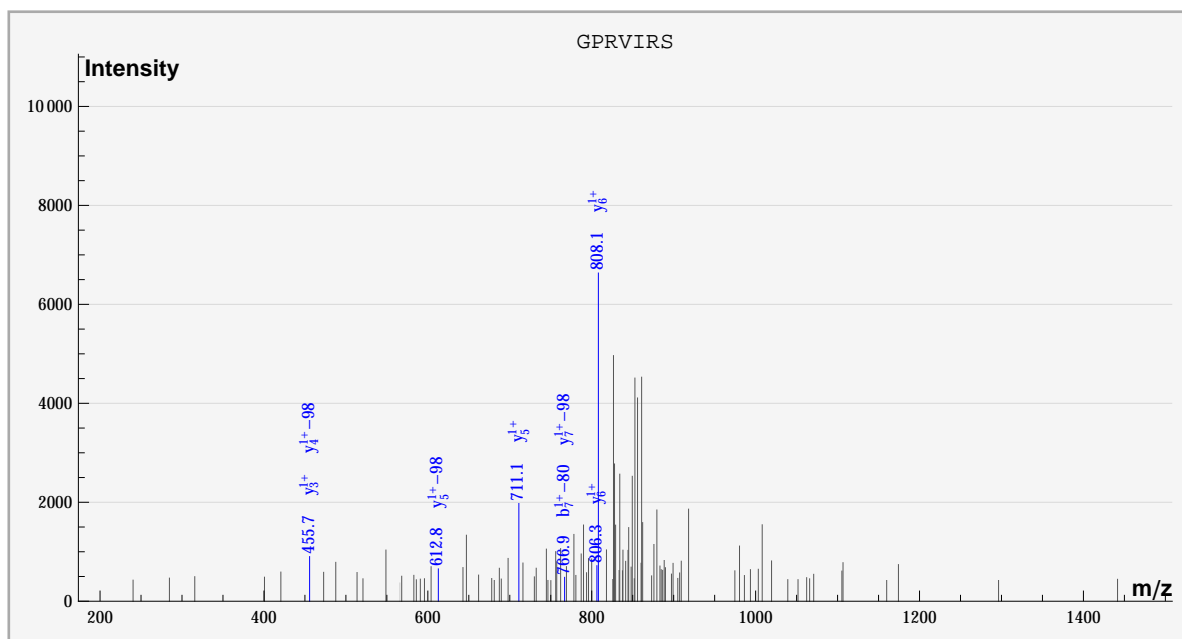

|   | # | b | b* | # | y | y* | P | P* |
|---|---|---|----|---|---|----|---|----|
| G | 1 |   |    |   |   |    |   | ✓  |
| P | 2 |   |    | 6 | ✓ |    |   |    |
| R | 3 |   |    | 5 | ✓ | ✓  |   |    |
| V | 4 |   |    | 4 |   | ✓  |   |    |
| I | 5 |   |    | 3 | ✓ |    |   |    |
| R | 6 |   |    | 2 |   |    |   |    |
| S | 7 | ✓ |    | 1 |   |    |   |    |

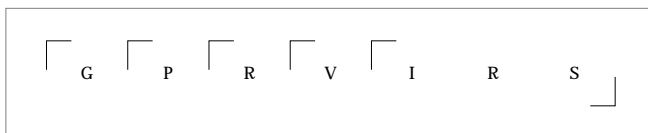





dbValid true TTTSVNLSYTL SK PHOS(4) 2. 867. 0.807447 5.22823 100. ? 48.  
 S\_Acido\_new%gi|68566694|gb|AAAY79623.1| TTTSVNLSYTL SK%:PHOS:PHOS:::PHOS::PHOS::%sample\_3%cmpd\_3068

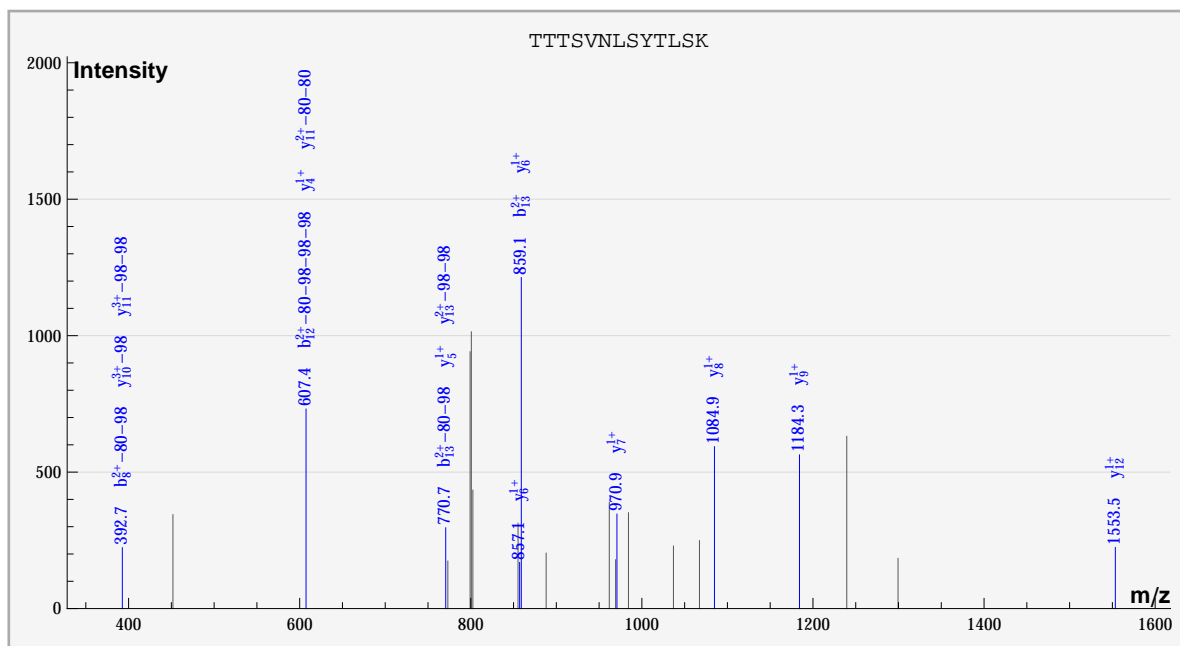

|   | #  | b | b* | #  | y | y* | P | P* |
|---|----|---|----|----|---|----|---|----|
| T | 1  |   |    |    |   |    |   | ✓  |
| T | 2  |   |    | 12 | ✓ |    |   |    |
| T | 3  |   |    | 11 |   | ✓  |   |    |
| S | 4  |   |    | 10 |   | ✓  |   |    |
| V | 5  |   |    | 9  | ✓ |    |   |    |
| N | 6  |   |    | 8  | ✓ |    |   |    |
| L | 7  |   |    | 7  | ✓ |    |   |    |
| S | 8  | ✓ |    | 6  | ✓ |    |   |    |
| Y | 9  |   |    | 5  | ✓ |    |   |    |
| T | 10 |   |    | 4  | ✓ |    |   |    |
| L | 11 |   |    | 3  |   |    |   |    |
| S | 12 | ✓ | ✓  | 2  |   |    |   |    |
| K | 13 | ✓ | ✓  | 1  |   |    |   |    |

「 T T T S V N L S 」 Y 「 T L S 」 K 」

dbValid true FYTNIK PHOS(1) 1. 867. -1.61448 5.24094 100. ? 2376.  
 S\_Acido\_new%gi|68567886|gb|AAY80815.1| FYTNIK%::PHOS::::%sample\_3%compd\_867

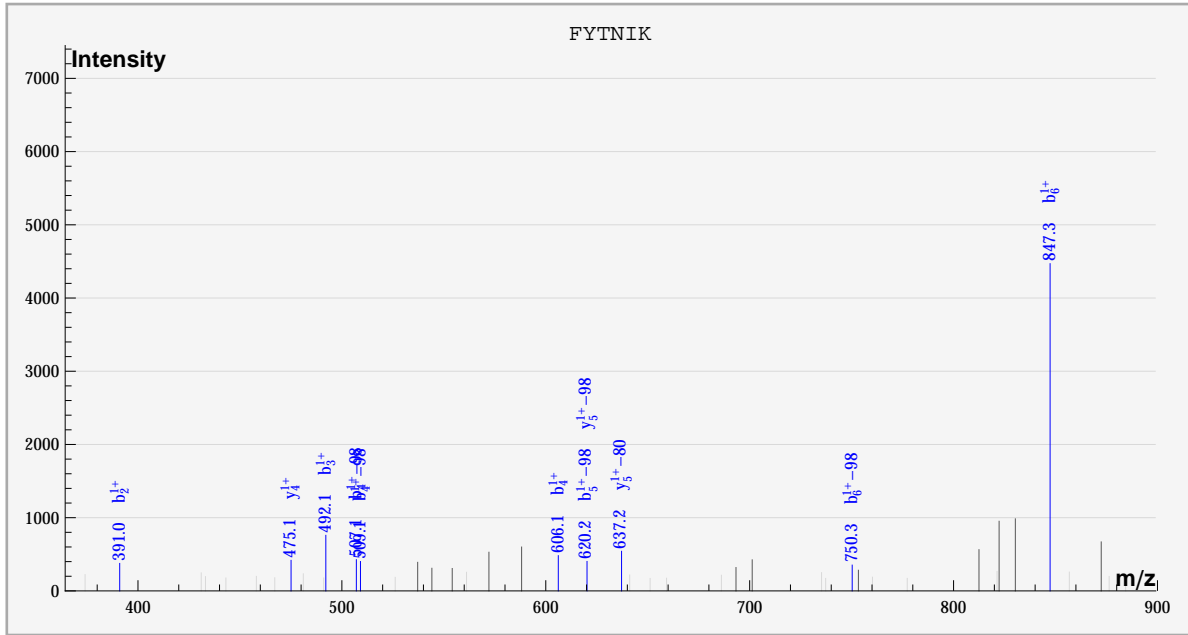

|   | # | b | b* | # | y | y* | P | P* |
|---|---|---|----|---|---|----|---|----|
| F | 1 |   |    |   |   |    |   |    |
| Y | 2 | ✓ |    | 5 | ✓ |    |   |    |
| T | 3 | ✓ |    | 4 | ✓ |    |   |    |
| N | 4 | ✓ | ✓  | 3 |   |    |   |    |
| I | 5 |   | ✓  | 2 |   |    |   |    |
| K | 6 | ✓ | ✓  | 1 |   |    |   |    |

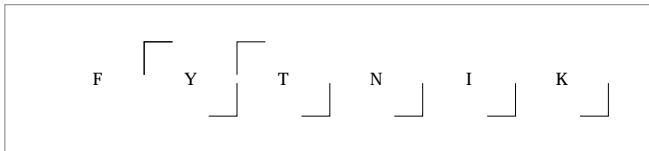

dbValid true FYTNIK PHOS(1) 1. 867. -1.61448 5.45731 100. ? 2388.  
 S\_Acido\_new%gi|68567886|gb|AAY80815.1| FYTNIK%::PHOS::::%sample\_3%compd\_877

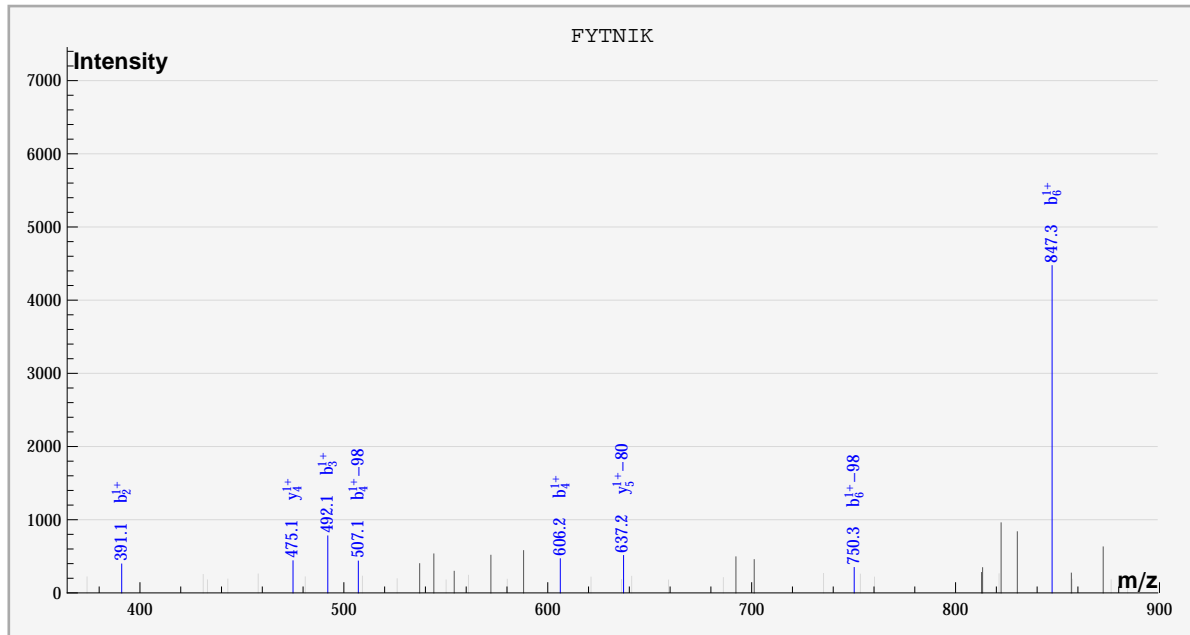

|   | # | b | b* | # | y | y* | P | P* |
|---|---|---|----|---|---|----|---|----|
| F | 1 |   |    |   |   |    |   |    |
| Y | 2 | ✓ |    | 5 | ✓ |    |   |    |
| T | 3 | ✓ |    | 4 | ✓ |    |   |    |
| N | 4 | ✓ | ✓  | 3 |   |    |   |    |
| I | 5 |   |    | 2 |   |    |   |    |
| K | 6 | ✓ | ✓  | 1 |   |    |   |    |

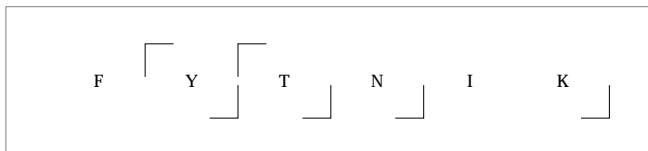

dbValid true MEPSFMGVSDWFK Oxidation\_M(1),PHOS(2) 2. 867. 1.81046 5.83226 100. ? 3192.

S\_Acido\_new%gi|68568238|gb|AAy81167.1| MEPSFMGVSDWFK:::PHOS::Oxidation\_M:::PHOS:::sample\_3%cmpd\_1772

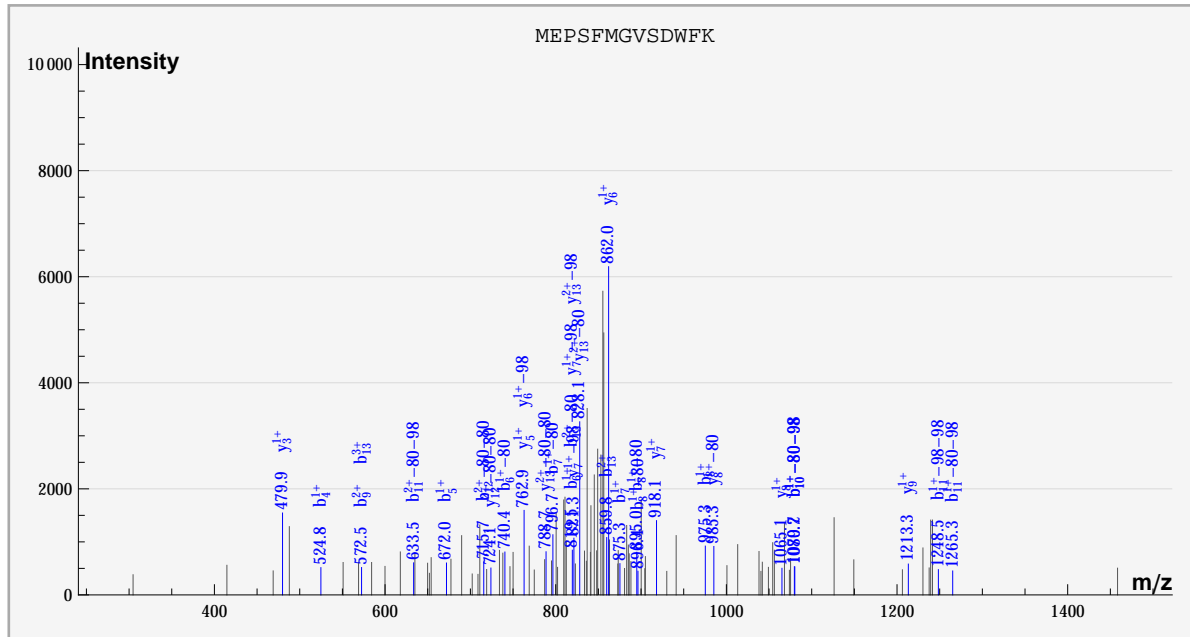

|   | #  | b | b* | #  | y | y* | P | P* |
|---|----|---|----|----|---|----|---|----|
| M | 1  |   |    |    |   |    |   | ✓  |
| E | 2  |   |    | 12 |   | ✓  |   |    |
| P | 3  |   |    | 11 |   |    |   |    |
| S | 4  | ✓ |    | 10 |   |    |   |    |
| F | 5  | ✓ |    | 9  | ✓ |    |   |    |
| M | 6  | ✓ | ✓  | 8  | ✓ | ✓  |   |    |
| G | 7  | ✓ | ✓  | 7  | ✓ | ✓  |   |    |
| V | 8  | ✓ | ✓  | 6  | ✓ | ✓  |   |    |
| S | 9  | ✓ |    | 5  | ✓ |    |   |    |
| D | 10 |   | ✓  | 4  |   |    |   |    |
| W | 11 |   | ✓  | 3  | ✓ |    |   |    |
| F | 12 |   | ✓  | 2  |   |    |   |    |
| K | 13 | ✓ | ✓  | 1  |   |    |   |    |

[ M ] [ E ] [ P ] [ S ] [ F ] [ M ] [ G ] [ V ] [ S ] [ D ] [ W ] [ F ] [ K ]

dbValid true KTLTSR PHOS(2) 1. 867. -1.64203 5.04535 100. ? 5364.  
 S\_Acido\_new%gi|68568463|gb|AAy81392.1| KTLTSR%:::PHOS:PHOS::%sample\_3%compd\_3745

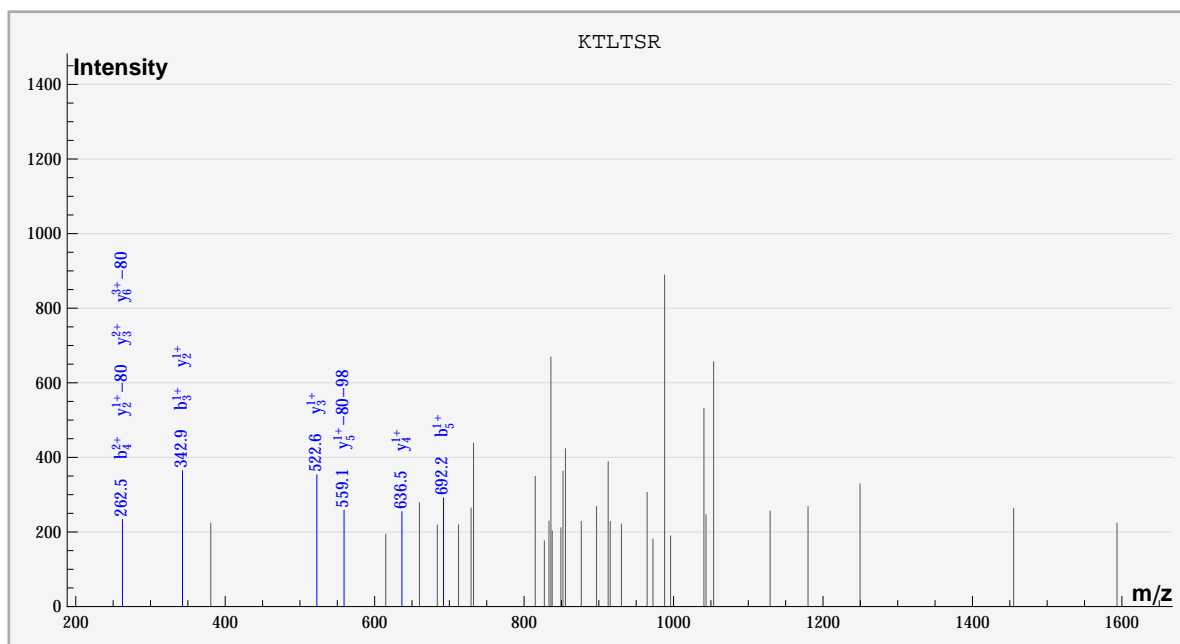

|   | # | b | b* | # | y | y* | P | P* |
|---|---|---|----|---|---|----|---|----|
| K | 1 |   |    |   |   |    |   | ✓  |
| T | 2 |   |    | 5 |   | ✓  |   |    |
| L | 3 | ✓ |    | 4 | ✓ |    |   |    |
| T | 4 | ✓ |    | 3 | ✓ |    |   |    |
| S | 5 | ✓ |    | 2 | ✓ | ✓  |   |    |
| R | 6 |   |    | 1 |   |    |   |    |

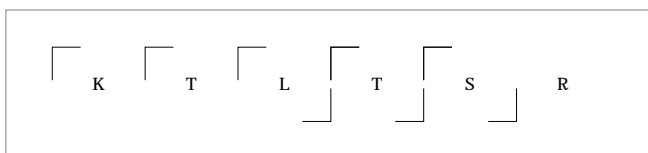

dbValid true YRGVSVGSVRRPLK PHOS(2) 2. 867.1 0.334192 5.40995 100. ? 2172.  
 S\_Acido\_new%gi|68566654|gb|AA79583.1| YRGVSVGSVRRPLK%:PHOS:::PHOS:::sample\_1%compd\_817

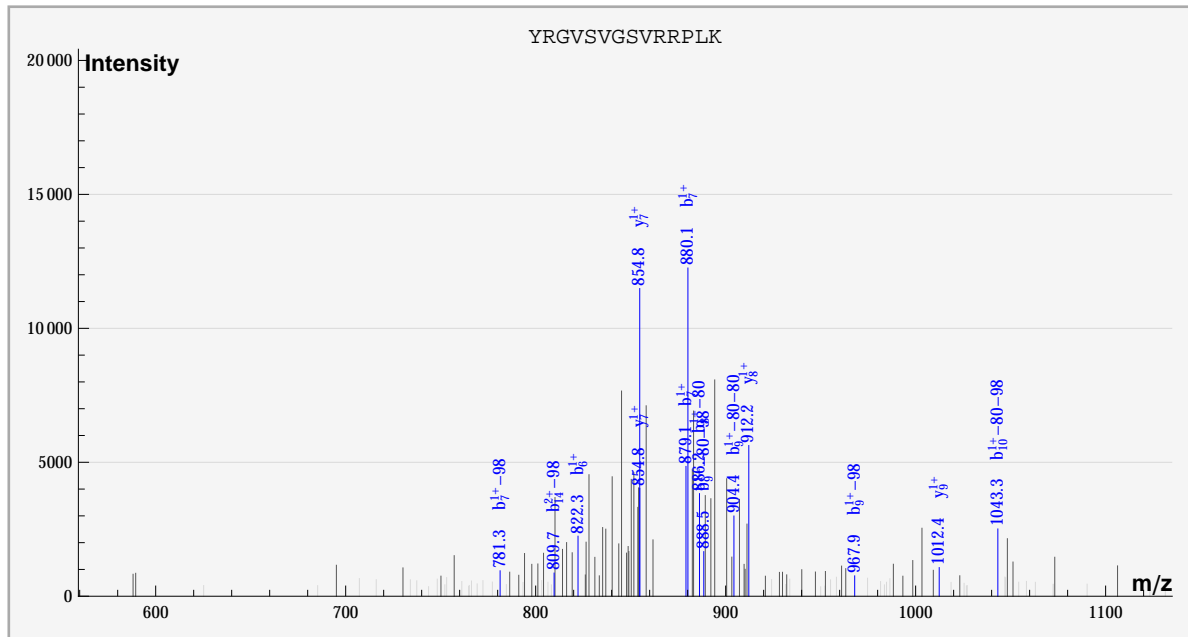

|   | #  | b | b* | #  | y | y* | P | P* |
|---|----|---|----|----|---|----|---|----|
| Y | 1  |   |    |    |   |    |   |    |
| R | 2  |   |    | 13 |   |    |   |    |
| G | 3  |   |    | 12 |   |    |   |    |
| V | 4  |   |    | 11 |   |    |   |    |
| S | 5  |   |    | 10 |   |    |   |    |
| V | 6  | ✓ |    | 9  | ✓ |    |   |    |
| G | 7  | ✓ | ✓  | 8  | ✓ |    |   |    |
| S | 8  |   | ✓  | 7  | ✓ |    |   |    |
| V | 9  |   | ✓  | 6  |   |    |   |    |
| R | 10 |   | ✓  | 5  |   |    |   |    |
| R | 11 |   |    | 4  |   |    |   |    |
| P | 12 |   |    | 3  |   |    |   |    |
| L | 13 |   |    | 2  |   |    |   |    |
| K | 14 | ✓ |    | 1  |   |    |   |    |

Y R G V S [V] [G] [S] V R R P L K

dbValid true MHTSRR PHOS(1) 1. 868. -0.634515 5.18789 100. ? 2148.  
 S\_Acido\_new%gi|68567755|gb|AAY80684.1| MHTSRR%:::PHOS:::sample\_3%compd\_821

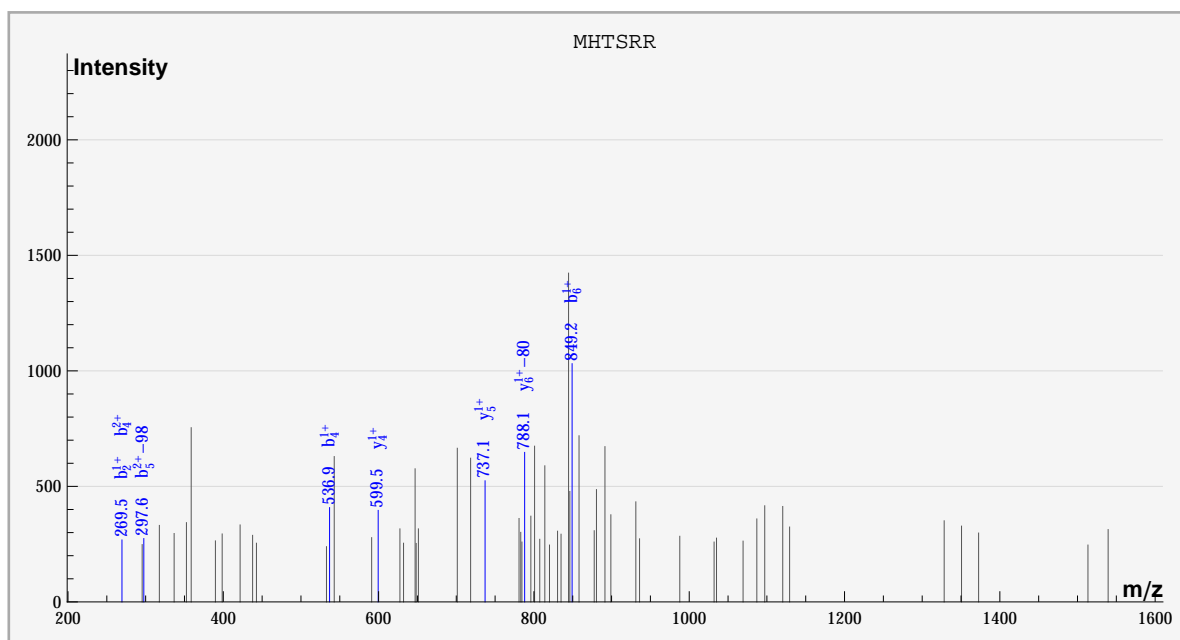

|   | # | b | b* | # | y | y* | P | P* |
|---|---|---|----|---|---|----|---|----|
| M | 1 |   |    |   |   |    |   | ✓  |
| H | 2 | ✓ |    | 5 | ✓ |    |   |    |
| T | 3 |   |    | 4 | ✓ |    |   |    |
| S | 4 | ✓ |    | 3 |   |    |   |    |
| R | 5 |   | ✓  | 2 |   |    |   |    |
| R | 6 | ✓ |    | 1 |   |    |   |    |

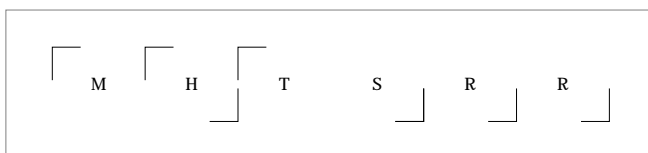



dbValid true GRLSNLK PHOS(1) 1. 869. -1.55524 5.09003 100. ? 2592.  
 S\_Acido\_new%gi|68567344|gb|AAY80273.1| GRLSNLK%:::PHOS:::%sample\_3%compd\_1052

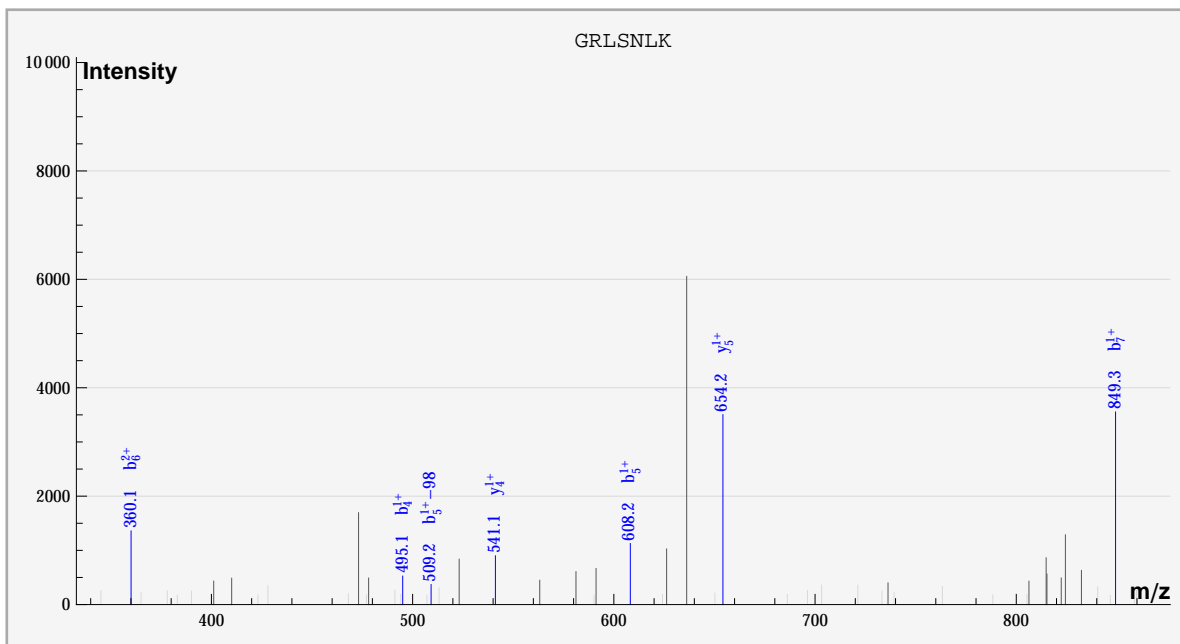

|   | # | b | b* | # | y | y* | P | P* |
|---|---|---|----|---|---|----|---|----|
| G | 1 |   |    |   |   |    |   |    |
| R | 2 |   |    | 6 |   |    |   |    |
| L | 3 |   |    | 5 | ✓ |    |   |    |
| S | 4 | ✓ |    | 4 | ✓ |    |   |    |
| N | 5 | ✓ | ✓  | 3 |   |    |   |    |
| L | 6 | ✓ |    | 2 |   |    |   |    |
| K | 7 | ✓ |    | 1 |   |    |   |    |

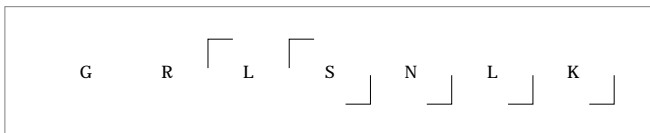

dbValid true GTINTER PHOS(1) 1. 869. 1.37167 5.08641 100. ? 2778.  
 S\_Acido\_new%gi|68567004|gb|AAY79933.1| GTINTER%::PHOS:::sample\_3%compd\_1398

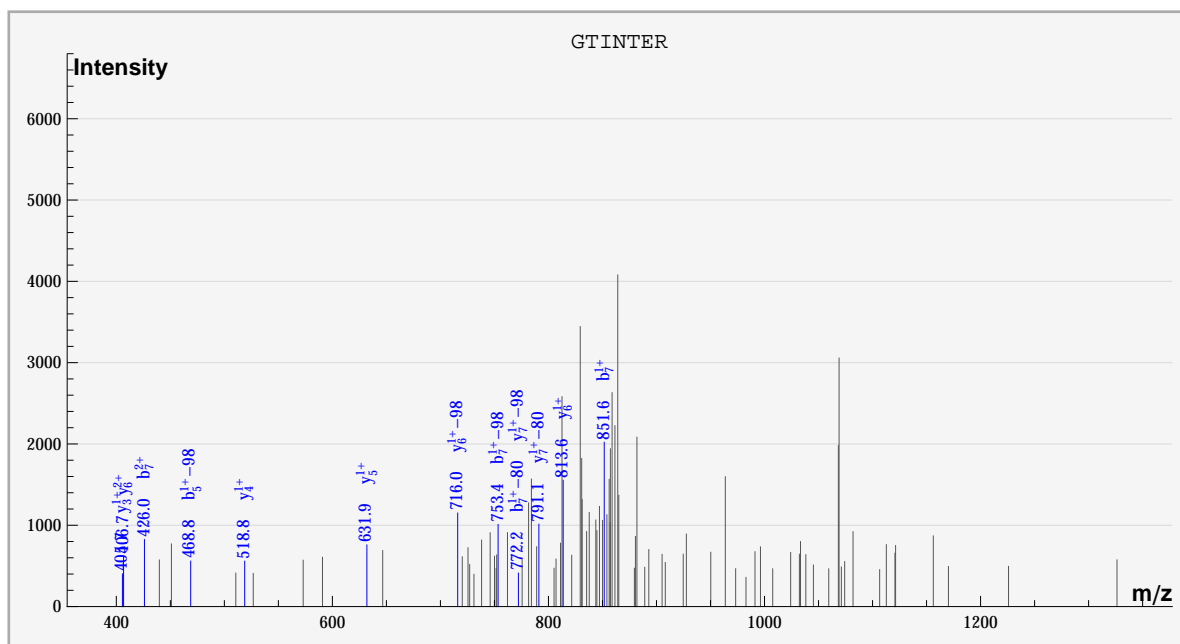

|   | # | b | b* | # | y | y* | P | P* |
|---|---|---|----|---|---|----|---|----|
| G | 1 |   |    |   |   |    |   | ✓  |
| T | 2 |   |    | 6 | ✓ | ✓  |   |    |
| I | 3 |   |    | 5 | ✓ |    |   |    |
| N | 4 |   |    | 4 | ✓ |    |   |    |
| T | 5 | ✓ |    | 3 | ✓ |    |   |    |
| E | 6 |   |    | 2 |   |    |   |    |
| R | 7 | ✓ | ✓  | 1 |   |    |   |    |

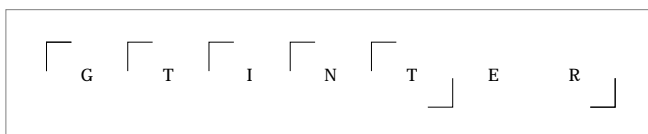

dbValid true TLSIAKR PHOS(1) 1. 869. -0.534835 5.20359 100. ? 2952.  
 S\_Acido\_new%gi|68568003|gb|AAY80932.1| TLSIAKR%:::PHOS:::sample\_3%compd\_1554

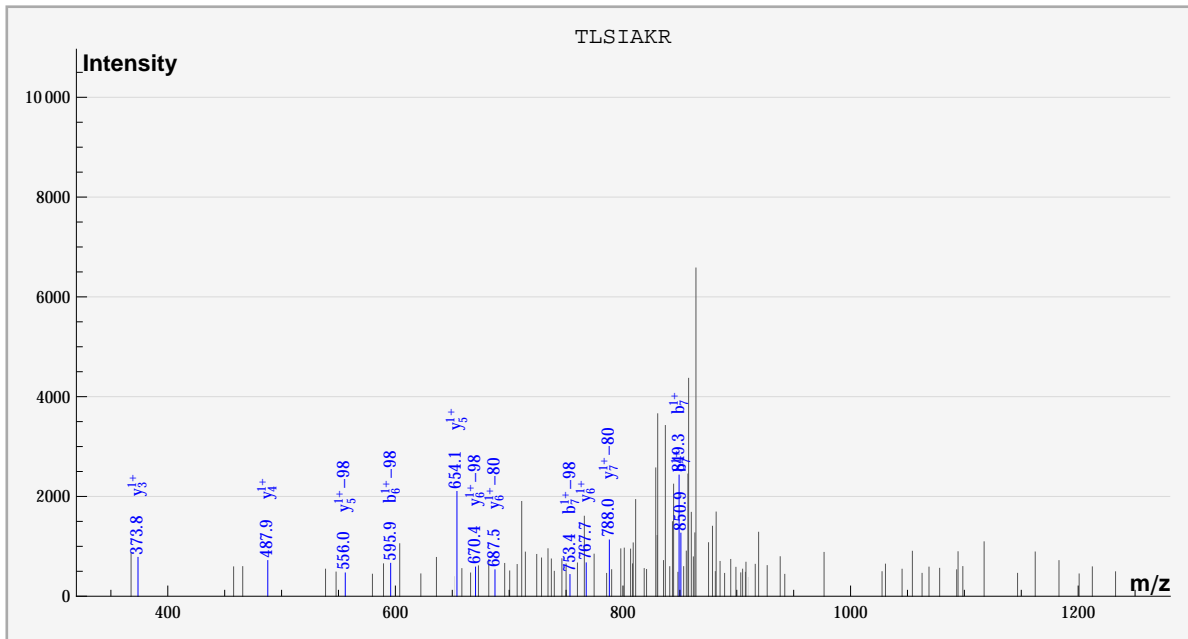

|   | # | b | b* | # | y | y* | P | P* |
|---|---|---|----|---|---|----|---|----|
| T | 1 |   |    |   |   |    |   | ✓  |
| L | 2 |   |    | 6 | ✓ | ✓  |   |    |
| S | 3 |   |    | 5 | ✓ | ✓  |   |    |
| I | 4 |   |    | 4 | ✓ |    |   |    |
| A | 5 |   |    | 3 | ✓ |    |   |    |
| K | 6 |   | ✓  | 2 |   |    |   |    |
| R | 7 | ✓ | ✓  | 1 |   |    |   |    |

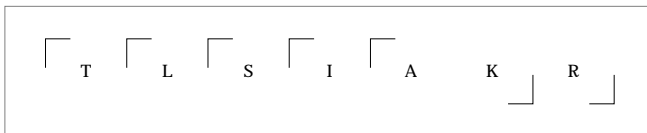

dbValid true YPKDAIIYYGTR PHOS(2) 2. 869. -1.1376 6.06646 100. ? 3462.

S\_Acido\_new%gi|68568512|gb|AA81441.1| YPKDAIIYYGTR%:PHOS:::PHOS::%sample\_3%compd\_2018

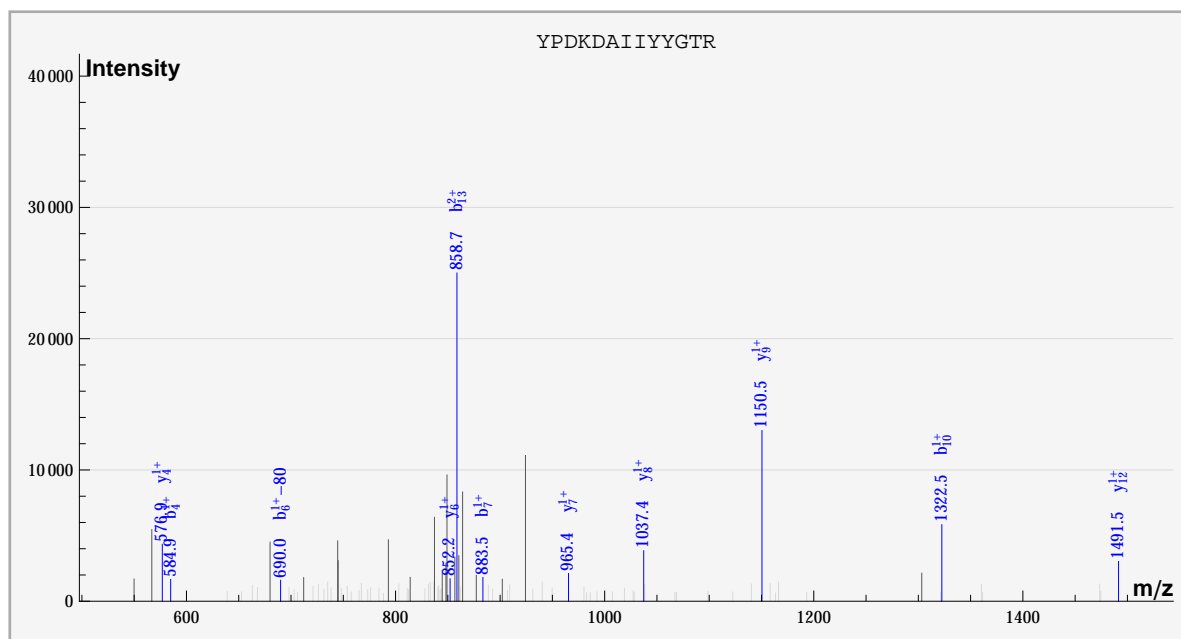

|   | #  | b | b* | #  | y | y* | P | P* |
|---|----|---|----|----|---|----|---|----|
| Y | 1  |   |    |    |   |    |   |    |
| P | 2  |   |    | 12 | ✓ |    |   |    |
| D | 3  |   |    | 11 |   |    |   |    |
| K | 4  | ✓ |    | 10 |   |    |   |    |
| D | 5  |   |    | 9  | ✓ |    |   |    |
| A | 6  |   | ✓  | 8  | ✓ |    |   |    |
| I | 7  | ✓ |    | 7  | ✓ |    |   |    |
| I | 8  |   |    | 6  | ✓ |    |   |    |
| Y | 9  |   |    | 5  |   |    |   |    |
| Y | 10 | ✓ |    | 4  | ✓ |    |   |    |
| G | 11 |   |    | 3  |   |    |   |    |
| T | 12 |   |    | 2  |   |    |   |    |
| R | 13 | ✓ |    | 1  |   |    |   |    |

Y [ P D K ] D [ A ] I ] I Y [ Y ] G T R ]

dbValid true VIHTYR PHOS(1) 1. 869. -0.592345 5.1402 100. ? 4662.  
 S\_Acido\_new%gi|68566736|gb|AAY79665.1| VIHTYR%::::PHOS::%sample\_3%compd\_3113

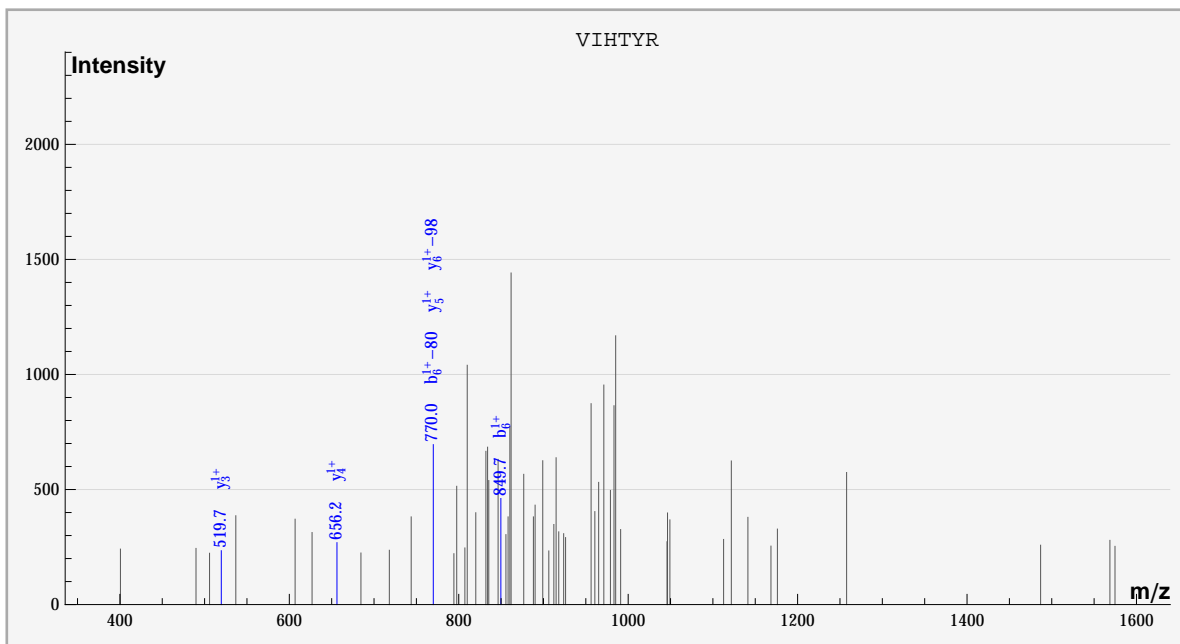

|   | # | b | b* | # | y | y* | P | P* |
|---|---|---|----|---|---|----|---|----|
| V | 1 |   |    |   |   |    |   | ✓  |
| I | 2 |   |    | 5 | ✓ |    |   |    |
| H | 3 |   |    | 4 | ✓ |    |   |    |
| T | 4 |   |    | 3 | ✓ |    |   |    |
| Y | 5 |   |    | 2 |   |    |   |    |
| R | 6 | ✓ | ✓  | 1 |   |    |   |    |

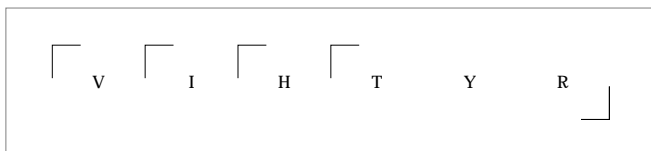

dbValid true DTISLLK PHOS(1) 1. 871. -1.56206 5.11166 100. ? 1860.  
 S\_Acido\_new%gi|68566552|gb|AAY79481.1| DTISLLK%::PHOS:::sample\_0%compd\_504

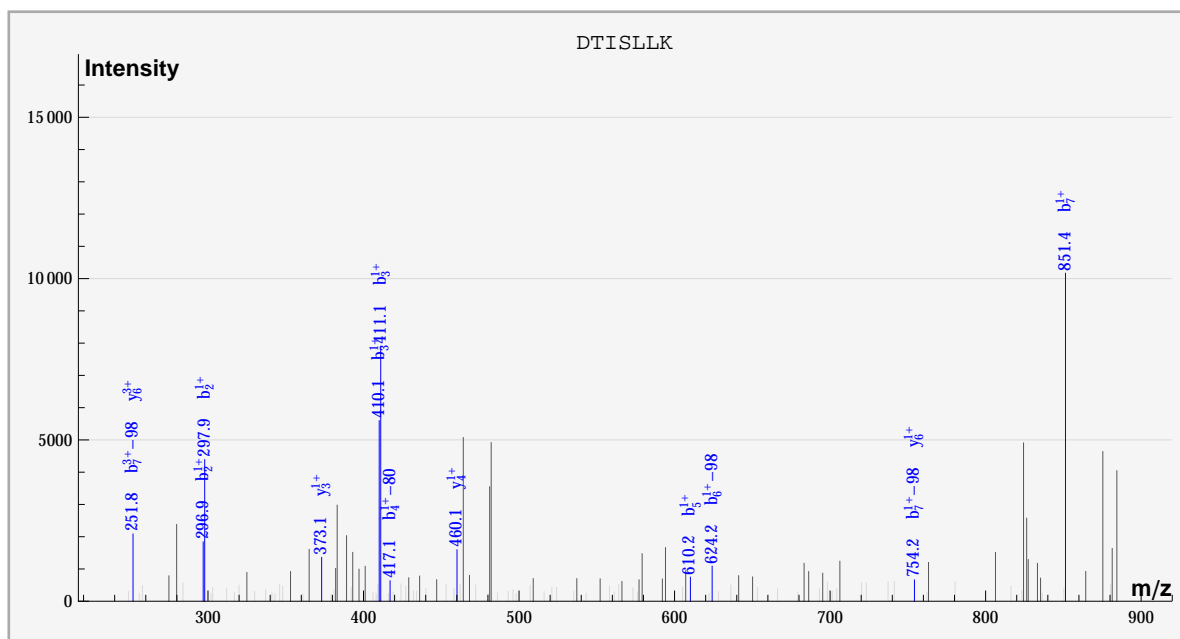

|   | # | b | b* | # | y | y* | P | P* |
|---|---|---|----|---|---|----|---|----|
| D | 1 |   |    |   |   |    |   |    |
| T | 2 | ✓ |    | 6 | ✓ |    |   |    |
| I | 3 | ✓ |    | 5 |   |    |   |    |
| S | 4 |   | ✓  | 4 | ✓ |    |   |    |
| L | 5 | ✓ |    | 3 | ✓ |    |   |    |
| L | 6 |   | ✓  | 2 |   |    |   |    |
| K | 7 | ✓ | ✓  | 1 |   |    |   |    |

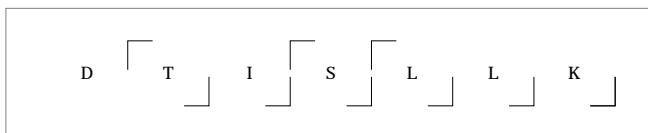



dbValid true DTISLLK PHOS(1) 1. 871. -1.56206 5.46162 100. ? 1944.  
 S\_Acido\_new%gi68566552|gb|AAY79481.1| DTISLLK%::PHOS:.....%sample\_0%compd\_575

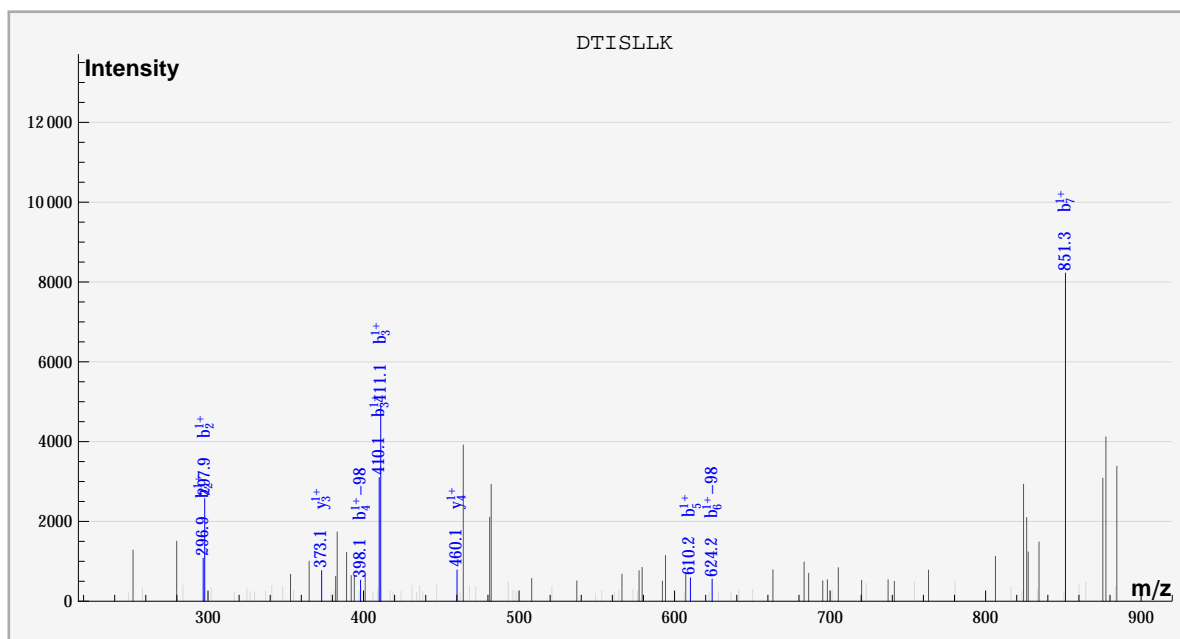

|   | # | b | b* | # | y | y* | P | P* |
|---|---|---|----|---|---|----|---|----|
| D | 1 |   |    |   |   |    |   |    |
| T | 2 | ✓ |    | 6 |   |    |   |    |
| I | 3 | ✓ |    | 5 |   |    |   |    |
| S | 4 |   | ✓  | 4 | ✓ |    |   |    |
| L | 5 | ✓ |    | 3 | ✓ |    |   |    |
| L | 6 |   | ✓  | 2 |   |    |   |    |
| K | 7 | ✓ |    | 1 |   |    |   |    |

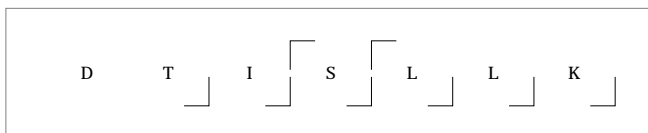



dbValid true DTISLLK PHOS(1) 1. 871. -1.56206 5.11082 100. ? 1980.  
 S\_Acido\_new%gi|68566552|gb|AAY79481.1| DTISLLK%::PHOS:::sample\_0%compd\_606

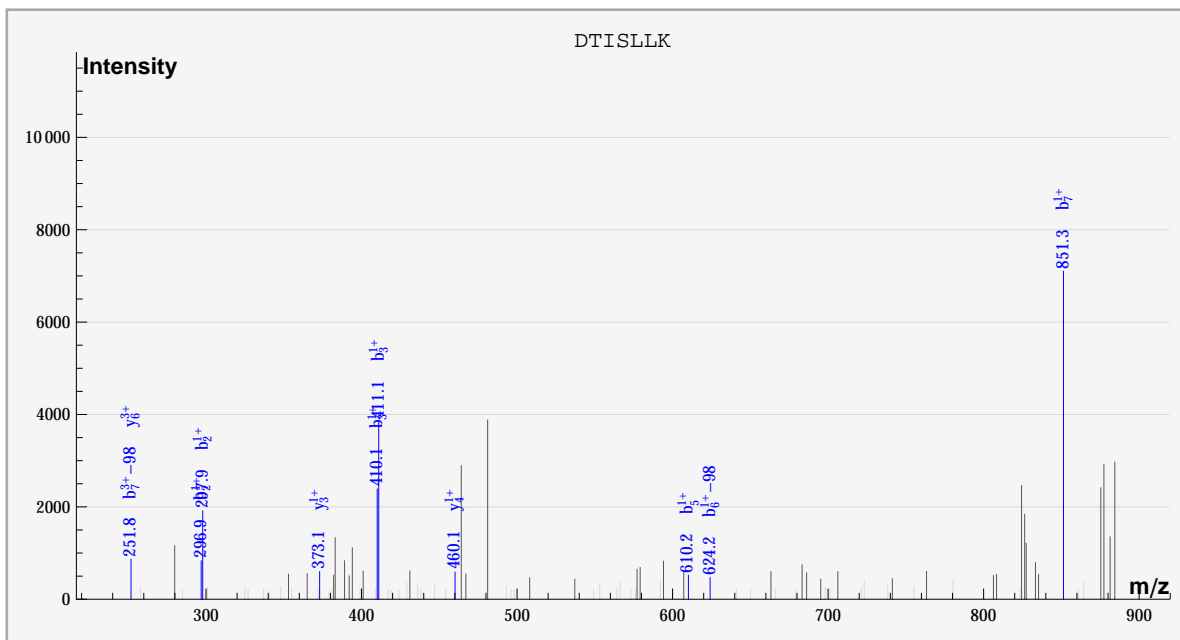

|   | # | b | b* | # | y | y* | P | P* |
|---|---|---|----|---|---|----|---|----|
| D | 1 |   |    |   |   |    |   |    |
| T | 2 | ✓ |    | 6 | ✓ |    |   |    |
| I | 3 | ✓ |    | 5 |   |    |   |    |
| S | 4 |   |    | 4 | ✓ |    |   |    |
| L | 5 | ✓ |    | 3 | ✓ |    |   |    |
| L | 6 |   | ✓  | 2 |   |    |   |    |
| K | 7 | ✓ | ✓  | 1 |   |    |   |    |

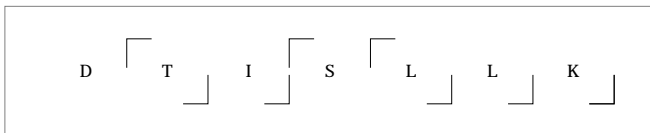

dbValid true MLTRIR PHOS(1) 1. 871. -1.55734 5.84895 100. ? 2154.  
 S\_Acido\_new%gi|68567926|gb|AAY80855.1| MLTRIR%:::PHOS:::%sample\_2%cmpd\_819

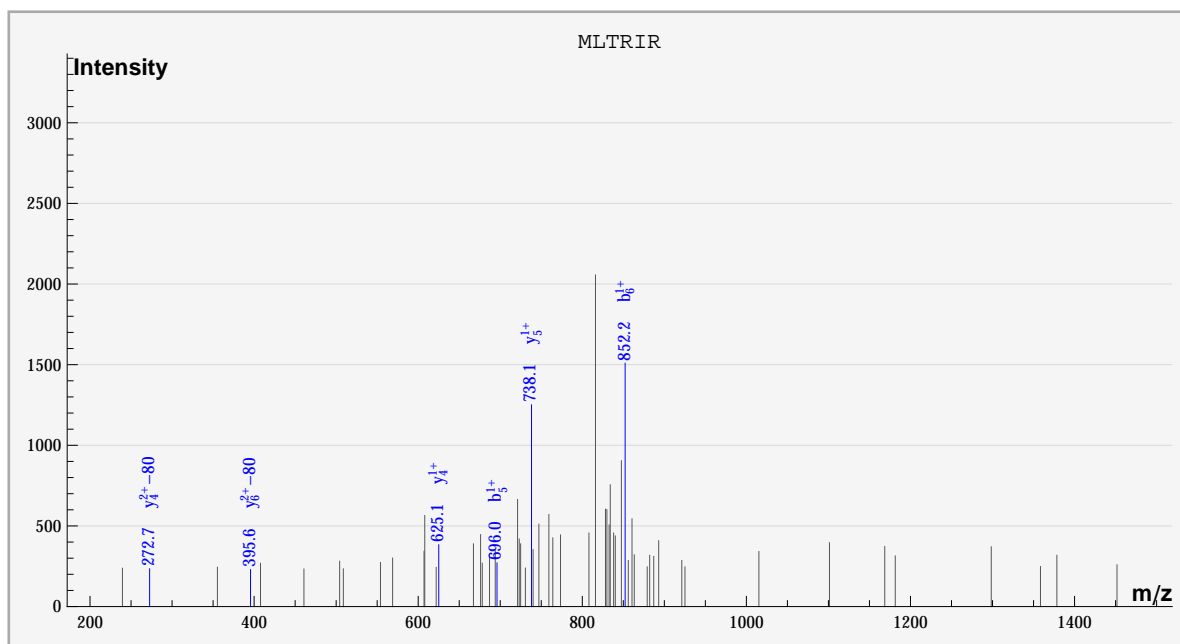

|   | # | b | b* | # | y | y* | P | P* |
|---|---|---|----|---|---|----|---|----|
| M | 1 |   |    |   |   |    |   | ✓  |
| L | 2 |   |    | 5 | ✓ |    |   |    |
| T | 3 |   |    | 4 | ✓ | ✓  |   |    |
| R | 4 |   |    | 3 |   |    |   |    |
| I | 5 | ✓ |    | 2 |   |    |   |    |
| R | 6 | ✓ |    | 1 |   |    |   |    |

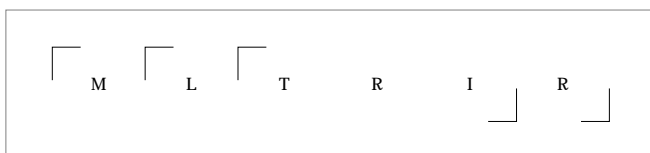

dbValid true VEKGDILVYPATLK PHOS(1) 2. 870.96 -0.986858 5.56098 100. ? 2796.  
 S\_Acido\_new%gi|68567731|gb|AA80660.1| VEKGDILVYPATLK%:::PHOS:::sample\_1%compd\_1503

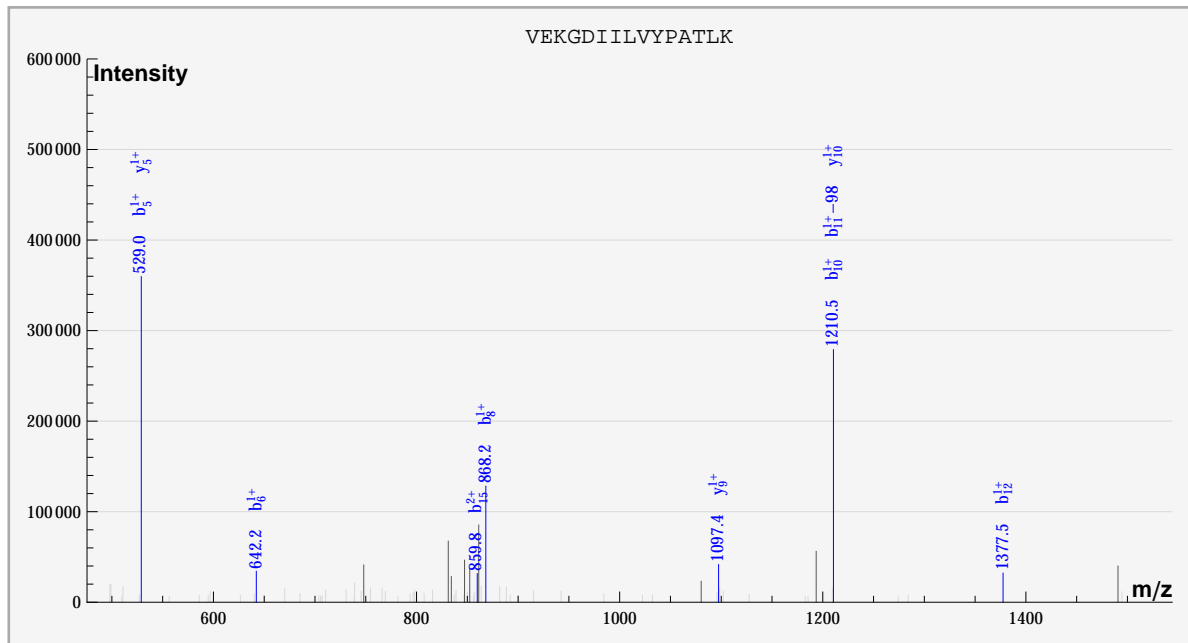

|   | #  | b | b* | #  | y | y* | P | P* |
|---|----|---|----|----|---|----|---|----|
| V | 1  |   |    |    |   |    |   |    |
| E | 2  |   |    | 14 |   |    |   |    |
| K | 3  |   |    | 13 |   |    |   |    |
| G | 4  |   |    | 12 |   |    |   |    |
| D | 5  | ✓ |    | 11 |   |    |   |    |
| I | 6  | ✓ |    | 10 | ✓ |    |   |    |
| I | 7  |   |    | 9  | ✓ |    |   |    |
| L | 8  | ✓ |    | 8  |   |    |   |    |
| V | 9  |   |    | 7  |   |    |   |    |
| Y | 10 | ✓ |    | 6  |   |    |   |    |
| P | 11 |   | ✓  | 5  | ✓ |    |   |    |
| A | 12 | ✓ |    | 4  |   |    |   |    |
| T | 13 |   |    | 3  |   |    |   |    |
| L | 14 |   |    | 2  |   |    |   |    |
| K | 15 | ✓ |    | 1  |   |    |   |    |

V E K G D I I L V Y P A T L K

dbValid true KNSVTLK PHOS(1) 1. 871. -1.55082 5.33771 100. ? 2838.  
 S\_Acido\_new%gi|68567236|gb|AAY80165.1| KNSVTLK%::::PHOS:::sample\_0%compd\_1323

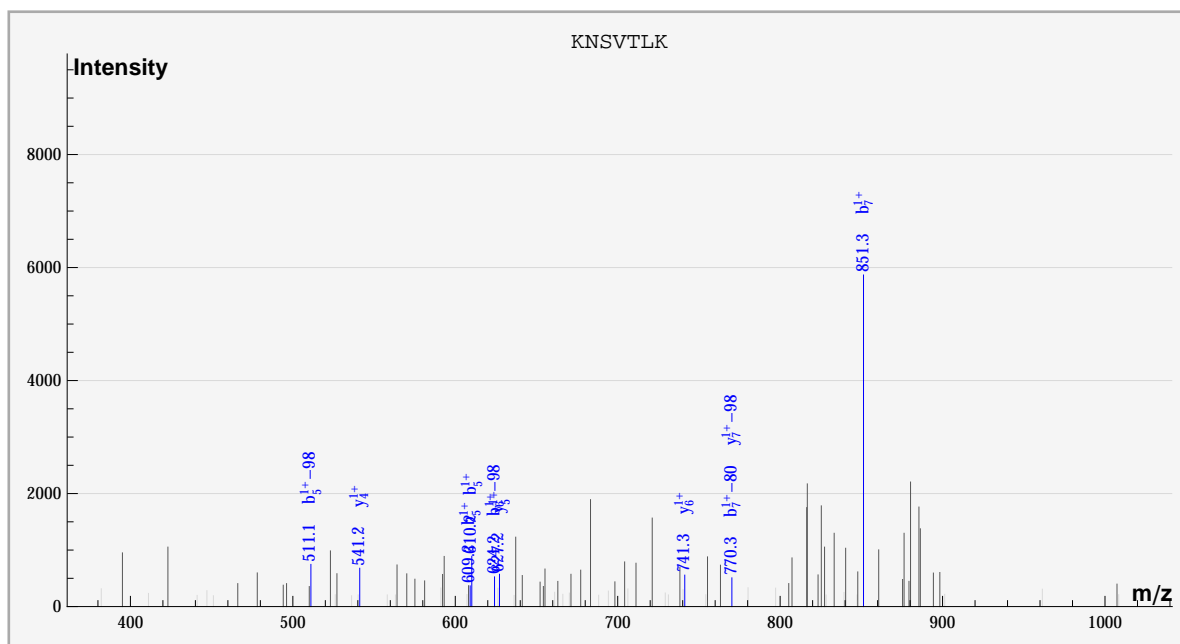

|   | # | b | b* | # | y | y* | P | P* |
|---|---|---|----|---|---|----|---|----|
| K | 1 |   |    |   |   |    |   | ✓  |
| N | 2 |   |    | 6 | ✓ |    |   |    |
| S | 3 |   |    | 5 | ✓ |    |   |    |
| V | 4 |   |    | 4 | ✓ |    |   |    |
| T | 5 | ✓ | ✓  | 3 |   |    |   |    |
| L | 6 |   | ✓  | 2 |   |    |   |    |
| K | 7 | ✓ | ✓  | 1 |   |    |   |    |

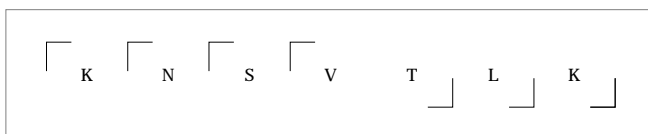

dbValid true YTHLTR PHOS(1) 1. 872. -1.61308 5.11447 100. ? 1980.  
 S\_Acido\_new%gi|68567895|gb|AAY80824.1| YTHLTR%:PHOS:::::sample\_0%compd\_607

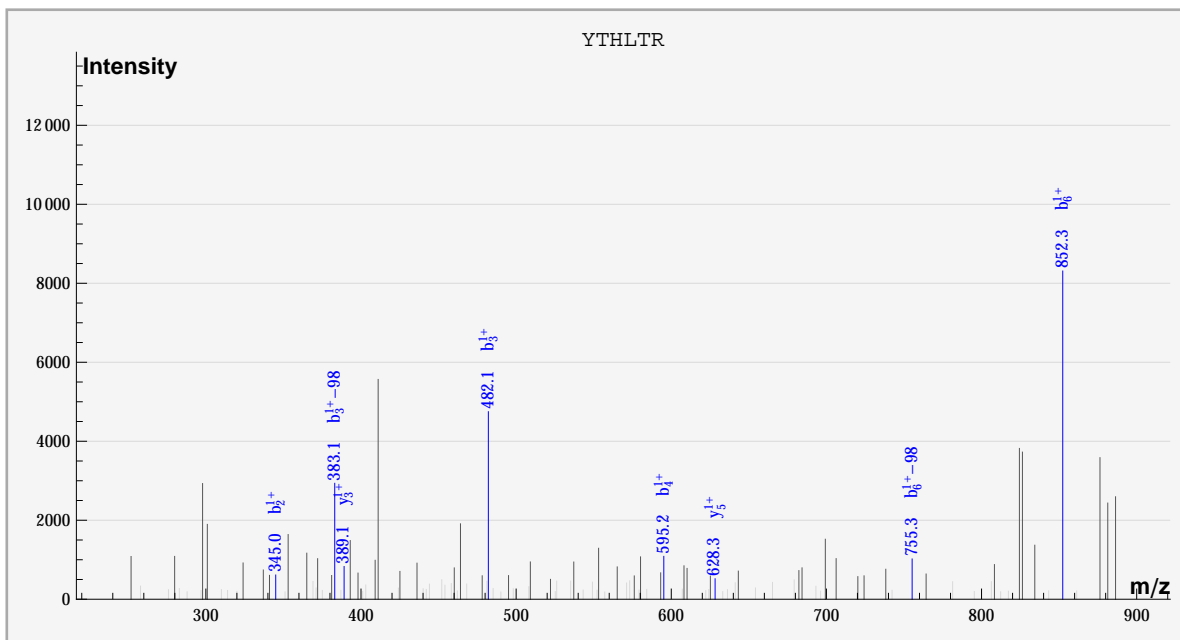

|   | # | b | b* | # | y | y* | P | P* |
|---|---|---|----|---|---|----|---|----|
| Y | 1 |   |    |   |   |    |   |    |
| T | 2 | ✓ |    | 5 | ✓ |    |   |    |
| H | 3 | ✓ | ✓  | 4 |   |    |   |    |
| L | 4 | ✓ |    | 3 | ✓ |    |   |    |
| T | 5 |   |    | 2 |   |    |   |    |
| R | 6 | ✓ | ✓  | 1 |   |    |   |    |

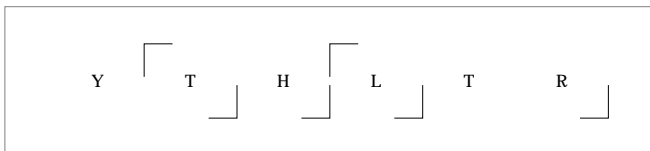

dbValid true YTHLTR PHOS(1) 1. 872. -1.61308 5.44387 100. ? 1992.  
 S\_Acido\_new%gi|68567895|gb|AAY80824.1| YTHLTR%:PHOS::::::%sample\_0%compd\_617

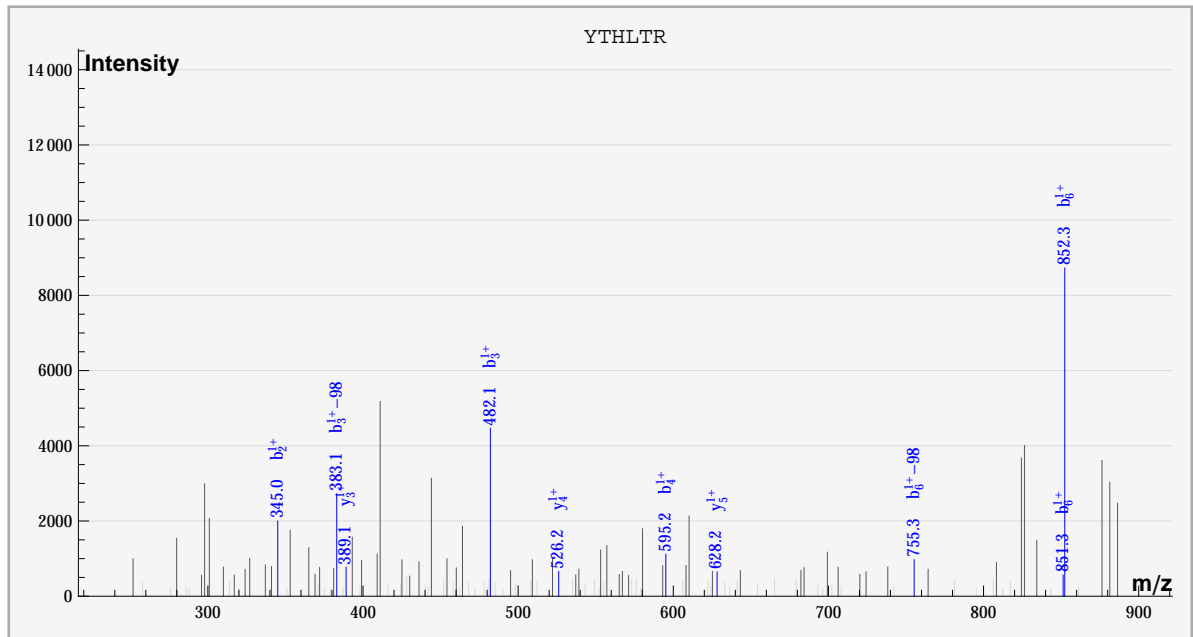

|   | # | b | b* | # | y | y* | P | P* |
|---|---|---|----|---|---|----|---|----|
| Y | 1 |   |    |   |   |    |   |    |
| T | 2 | ✓ |    | 5 | ✓ |    |   |    |
| H | 3 | ✓ | ✓  | 4 | ✓ |    |   |    |
| L | 4 | ✓ |    | 3 | ✓ |    |   |    |
| T | 5 |   |    | 2 |   |    |   |    |
| R | 6 | ✓ | ✓  | 1 |   |    |   |    |

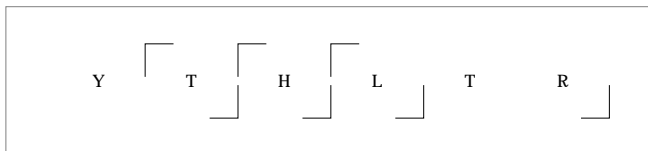

dbValid true ETNVSIE PHOS(1) 1. 872. -0.655555 5.27625 100. ? 2112.  
 S\_Acido\_new%gi|68567258|gb|AAY80187.1| ETNVSIE%:::PHOS:::sample\_0%compd\_718

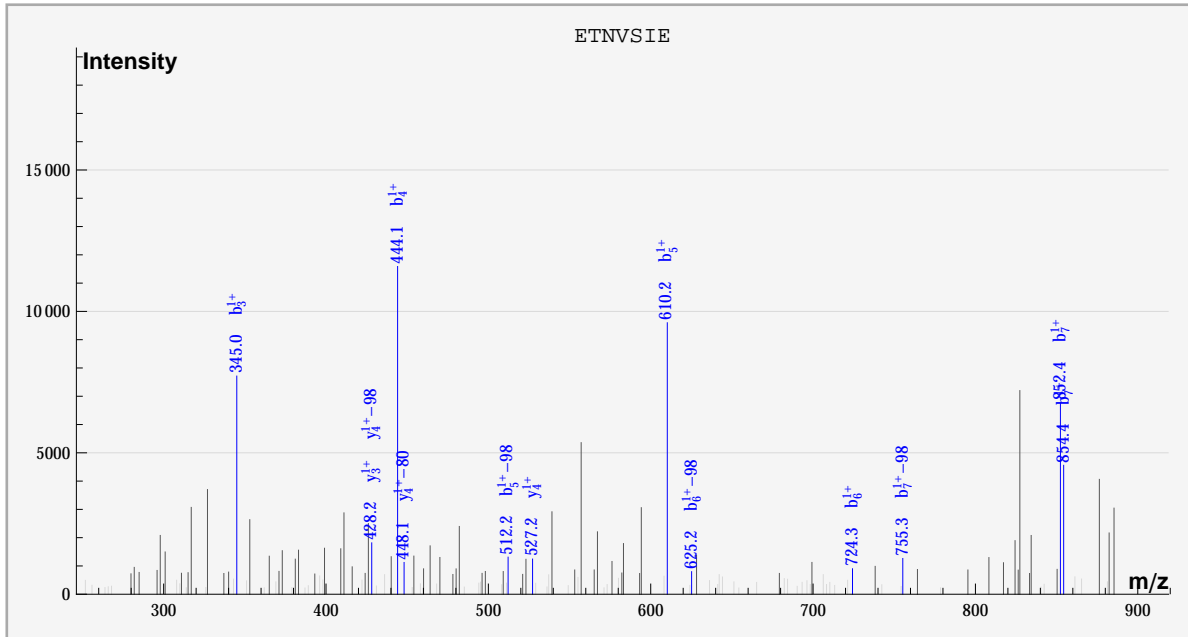

|   | # | b | b* | # | y | y* | P | P* |
|---|---|---|----|---|---|----|---|----|
| E | 1 |   |    |   |   |    |   |    |
| T | 2 |   |    | 6 |   |    |   |    |
| N | 3 | ✓ |    | 5 |   |    |   |    |
| V | 4 | ✓ |    | 4 | ✓ | ✓  |   |    |
| S | 5 | ✓ | ✓  | 3 | ✓ |    |   |    |
| I | 6 | ✓ | ✓  | 2 |   |    |   |    |
| E | 7 | ✓ | ✓  | 1 |   |    |   |    |

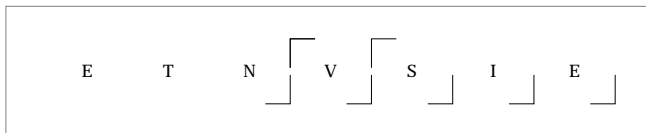

dbValid true ETNVSIE PHOS(1) 1. 872. -0.655555 5.23258 100. ? 2124.  
 S\_Acido\_new%gi|68567258|gb|AAY80187.1| ETNVSIE%:::PHOS:::sample\_0%compd\_728

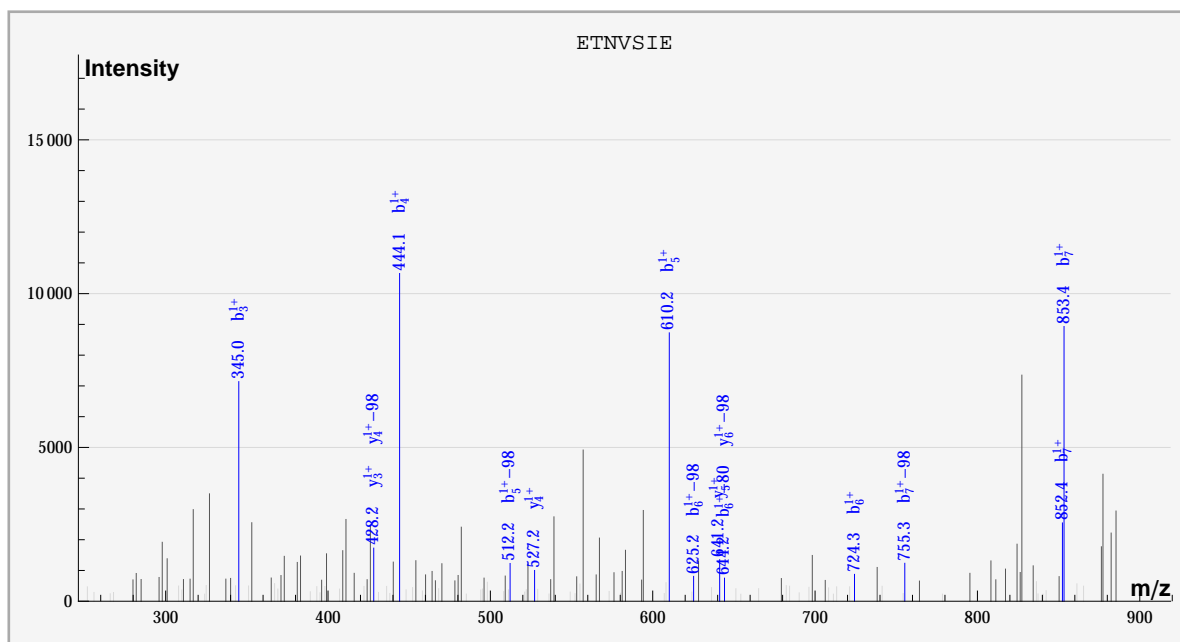

|   | # | b | b* | # | y | y* | P | P* |
|---|---|---|----|---|---|----|---|----|
| E | 1 |   |    |   |   |    |   |    |
| T | 2 |   |    | 6 |   | ✓  |   |    |
| N | 3 | ✓ |    | 5 | ✓ |    |   |    |
| V | 4 | ✓ |    | 4 | ✓ | ✓  |   |    |
| S | 5 | ✓ | ✓  | 3 | ✓ |    |   |    |
| I | 6 | ✓ | ✓  | 2 |   |    |   |    |
| E | 7 | ✓ | ✓  | 1 |   |    |   |    |

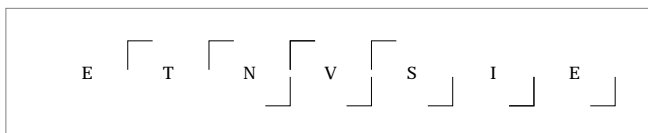



dbValid true ETNVSIE PHOS(1) 1. 872. -0.655555 5.49156 100. ? 2136.  
 S\_Acido\_new%gi|68567258|gb|AAY80187.1| ETNVSIE%::::PHOS:::sample\_0%compd\_738

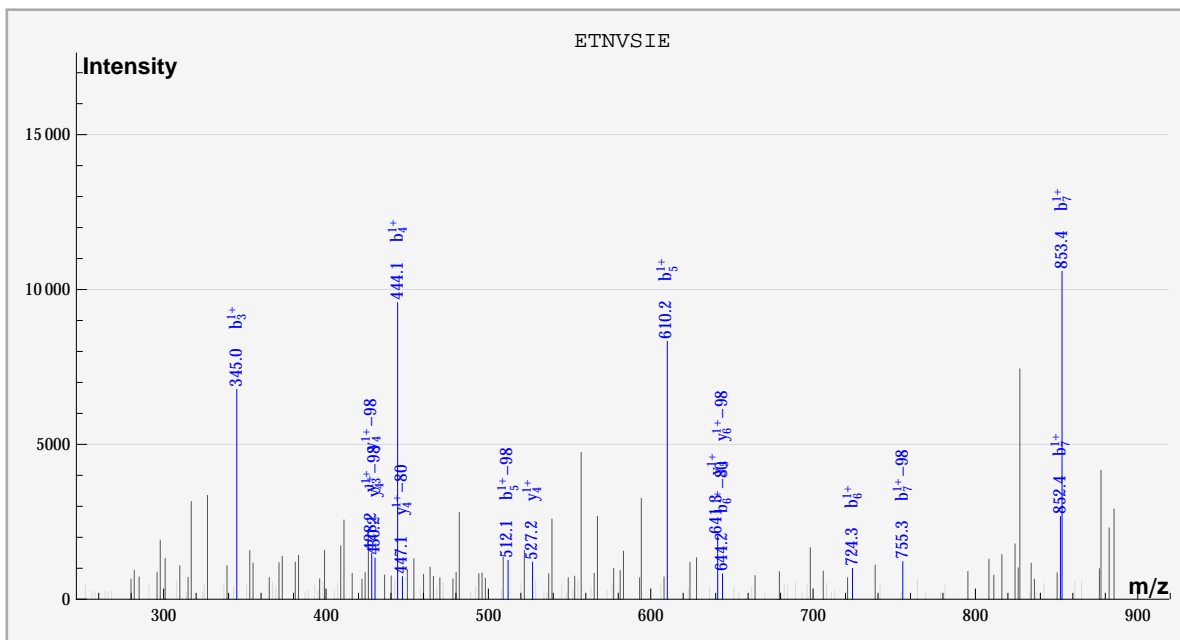

|   | # | b | b* | # | y | y* | P | P* |
|---|---|---|----|---|---|----|---|----|
| E | 1 |   |    |   |   |    |   |    |
| T | 2 |   |    | 6 |   | ✓  |   |    |
| N | 3 | ✓ |    | 5 | ✓ |    |   |    |
| V | 4 | ✓ |    | 4 | ✓ | ✓  |   |    |
| S | 5 | ✓ | ✓  | 3 | ✓ |    |   |    |
| I | 6 | ✓ | ✓  | 2 |   |    |   |    |
| E | 7 | ✓ | ✓  | 1 |   |    |   |    |

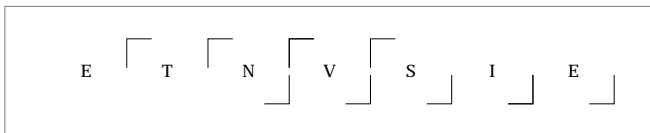

dbValid true ETNVSIE PHOS(1) 1. 872. -0.655555 5.63886 100. ? 2148.  
 S\_Acido\_new%gi|68567258|gb|AAY80187.1| ETNVSIE%:::PHOS:::sample\_0%compd\_748

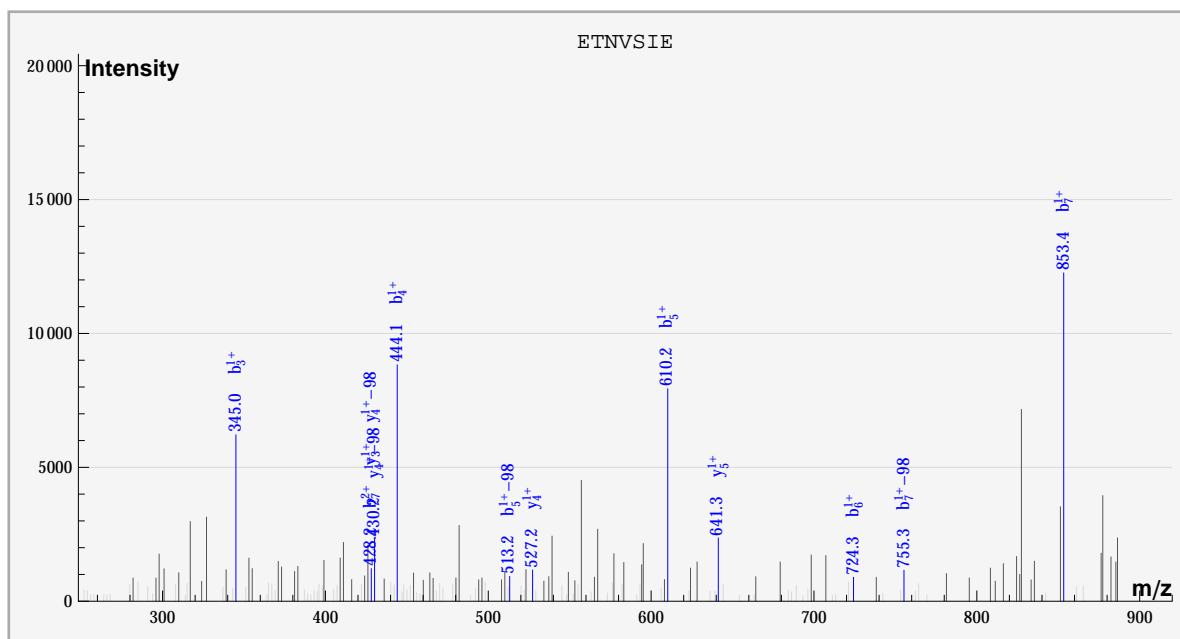

|   | # | b | b* | # | y | y* | P | P* |
|---|---|---|----|---|---|----|---|----|
| E | 1 |   |    |   |   |    |   |    |
| T | 2 |   |    | 6 |   |    |   |    |
| N | 3 | ✓ |    | 5 | ✓ |    |   |    |
| V | 4 | ✓ |    | 4 | ✓ | ✓  |   |    |
| S | 5 | ✓ | ✓  | 3 | ✓ |    |   |    |
| I | 6 | ✓ |    | 2 |   |    |   |    |
| E | 7 | ✓ | ✓  | 1 |   |    |   |    |

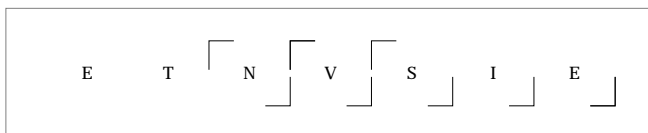

dbValid true ETNVSIE PHOS(1) 1. 872. -0.655555 5.41947 100. ? 2160.  
 S\_Acido\_new%gi|68567258|gb|AAY80187.1| ETNVSIE%:::PHOS:::sample\_0%compd\_758

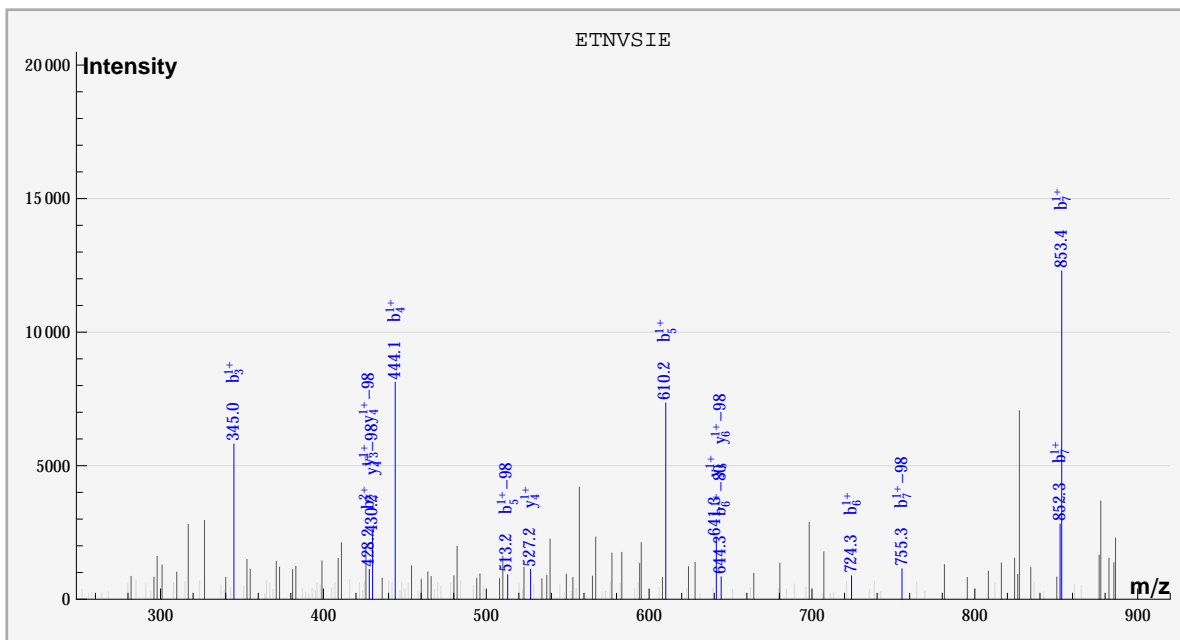

|   | # | b | b* | # | y | y* | P | P* |
|---|---|---|----|---|---|----|---|----|
| E | 1 |   |    |   |   |    |   |    |
| T | 2 |   |    | 6 |   | ✓  |   |    |
| N | 3 | ✓ |    | 5 | ✓ |    |   |    |
| V | 4 | ✓ |    | 4 | ✓ | ✓  |   |    |
| S | 5 | ✓ | ✓  | 3 | ✓ |    |   |    |
| I | 6 | ✓ | ✓  | 2 |   |    |   |    |
| E | 7 | ✓ | ✓  | 1 |   |    |   |    |

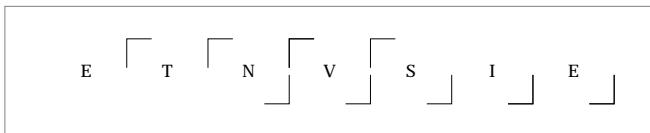

dbValid true ETNVSIE PHOS(1) 1. 872. -0.655555 5.35219 100. ? 2172.  
 S\_Acido\_new%gi|68567258|gb|AAY80187.1| ETNVSIE%:::PHOS:::sample\_0%compd\_768

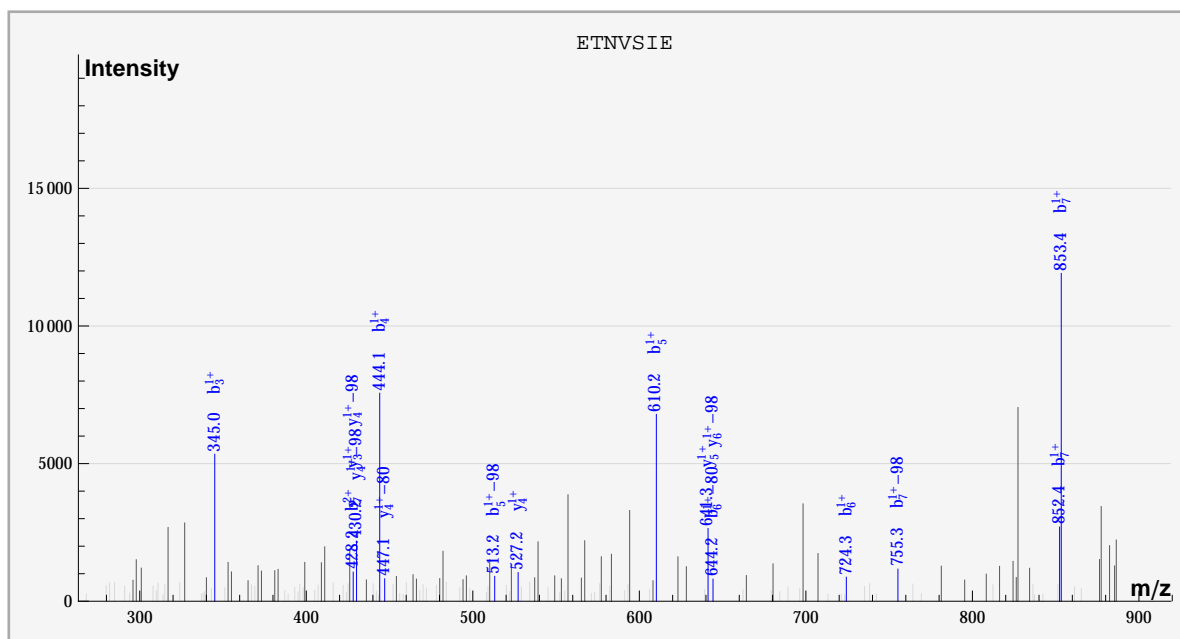

|   | # | b | b* | # | y | y* | P | P* |
|---|---|---|----|---|---|----|---|----|
| E | 1 |   |    |   |   |    |   |    |
| T | 2 |   |    | 6 |   | ✓  |   |    |
| N | 3 | ✓ |    | 5 | ✓ |    |   |    |
| V | 4 | ✓ |    | 4 | ✓ | ✓  |   |    |
| S | 5 | ✓ | ✓  | 3 | ✓ |    |   |    |
| I | 6 | ✓ | ✓  | 2 |   |    |   |    |
| E | 7 | ✓ | ✓  | 1 |   |    |   |    |

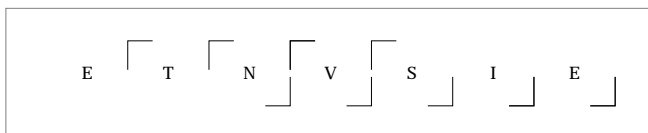

dbValid true ETNVSIE PHOS(1) 1. 872. -0.655555 5.52658 100. ? 2184.  
 S\_Acido\_new%gi|68567258|gb|AAY80187.1| ETNVSIE%:::PHOS:::sample\_0%compd\_779

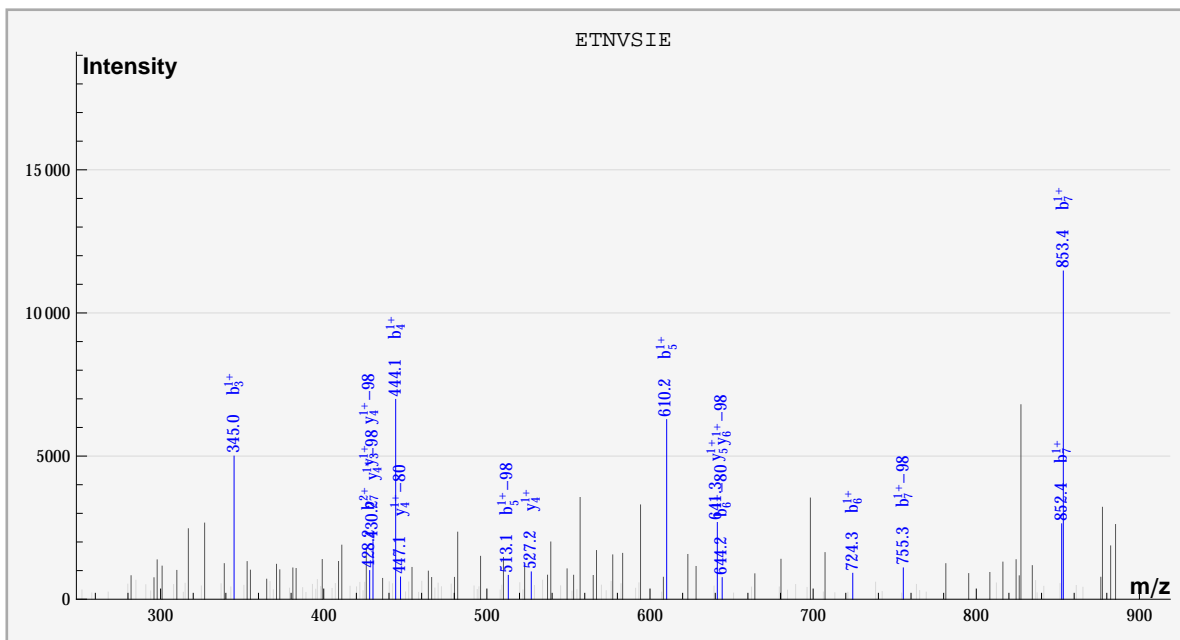

|   | # | b | b* | # | y | y* | P | P* |
|---|---|---|----|---|---|----|---|----|
| E | 1 |   |    |   |   |    |   |    |
| T | 2 |   |    | 6 |   | ✓  |   |    |
| N | 3 | ✓ |    | 5 | ✓ |    |   |    |
| V | 4 | ✓ |    | 4 | ✓ | ✓  |   |    |
| S | 5 | ✓ | ✓  | 3 | ✓ |    |   |    |
| I | 6 | ✓ | ✓  | 2 |   |    |   |    |
| E | 7 | ✓ | ✓  | 1 |   |    |   |    |



dbValid true ETNVSIE PHOS(1) 1. 872. -0.655555 5.36572 100. ? 2196.  
 S\_Acido\_new%gi|68567258|gb|AAY80187.1| ETNVSIE%:::PHOS:::sample\_0%compd\_790

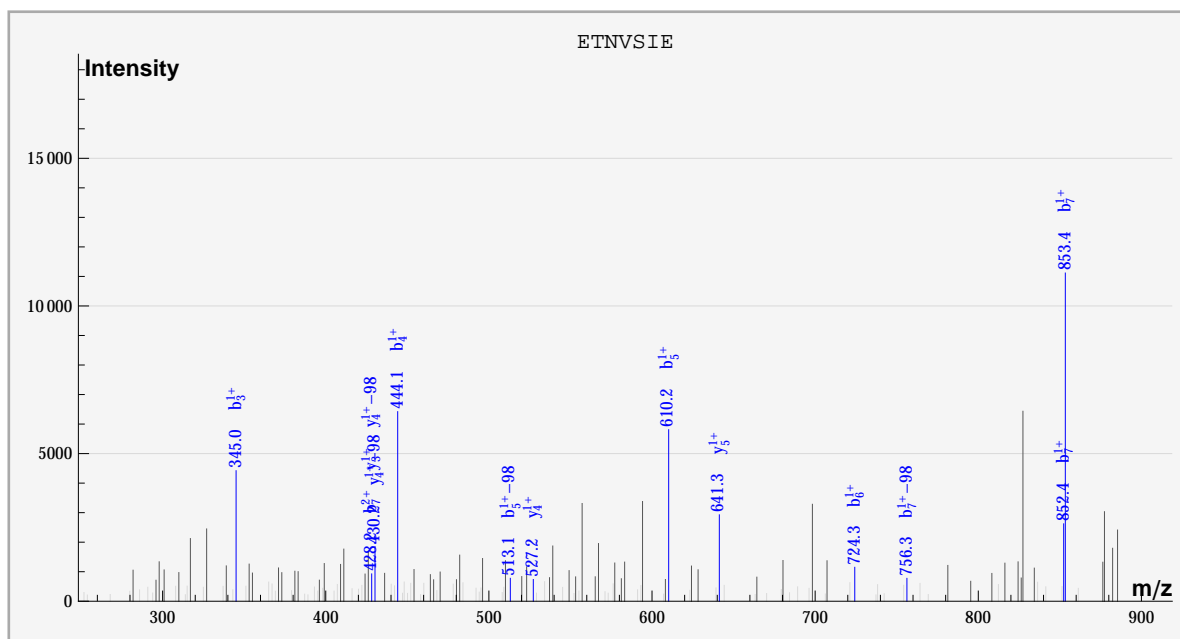

|   | # | b | b* | # | y | y* | P | P* |
|---|---|---|----|---|---|----|---|----|
| E | 1 |   |    |   |   |    |   |    |
| T | 2 |   |    | 6 |   |    |   |    |
| N | 3 | ✓ |    | 5 | ✓ |    |   |    |
| V | 4 | ✓ |    | 4 | ✓ | ✓  |   |    |
| S | 5 | ✓ | ✓  | 3 | ✓ |    |   |    |
| I | 6 | ✓ |    | 2 |   |    |   |    |
| E | 7 | ✓ | ✓  | 1 |   |    |   |    |



dbValid true ETNVSIE PHOS(1) 1. 872. -0.655555 5.19556 100. ? 2208.  
 S\_Acido\_new%gi|68567258|gb|AAY80187.1| ETNVSIE%:::PHOS:::sample\_0%compd\_800

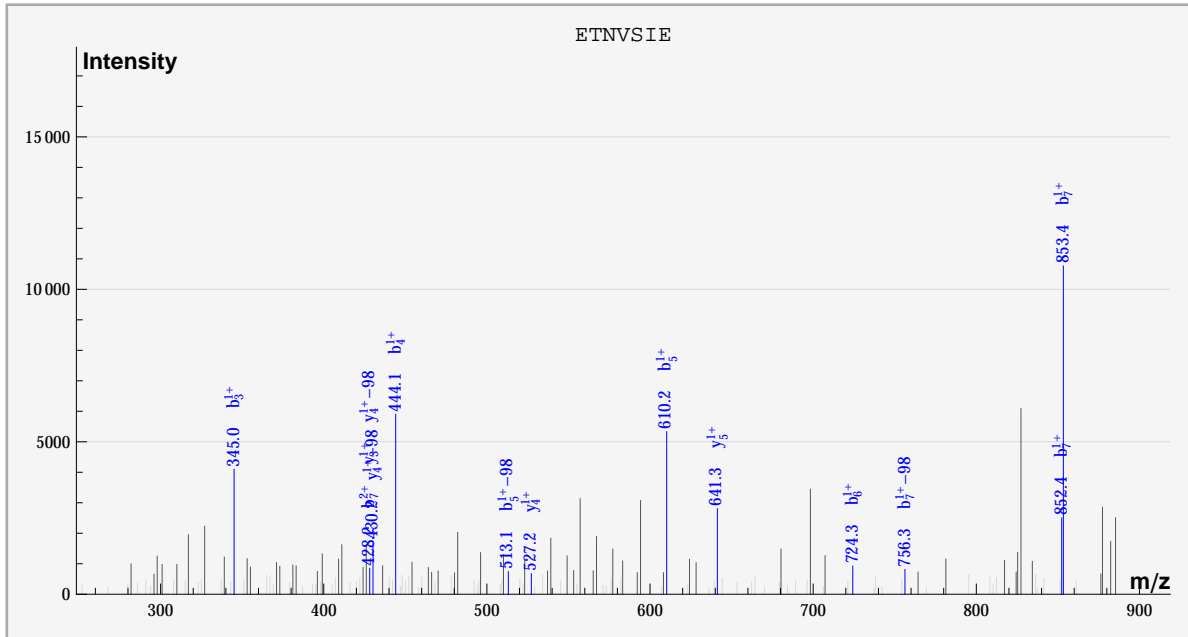

|   | # | b | b* | # | y | y* | P | P* |
|---|---|---|----|---|---|----|---|----|
| E | 1 |   |    |   |   |    |   |    |
| T | 2 |   |    | 6 |   |    |   |    |
| N | 3 | ✓ |    | 5 | ✓ |    |   |    |
| V | 4 | ✓ |    | 4 | ✓ | ✓  |   |    |
| S | 5 | ✓ | ✓  | 3 | ✓ |    |   |    |
| I | 6 | ✓ |    | 2 |   |    |   |    |
| E | 7 | ✓ | ✓  | 1 |   |    |   |    |

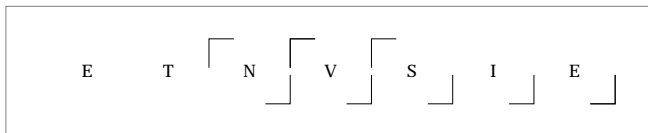

dbValid true ETNVSIE PHOS(1) 1. 872. -0.655555 5.69605 100. ? 2220.  
 S\_Acido\_new%gi|68567258|gb|AAY80187.1| ETNVSIE%::::PHOS:::sample\_0%compd\_811

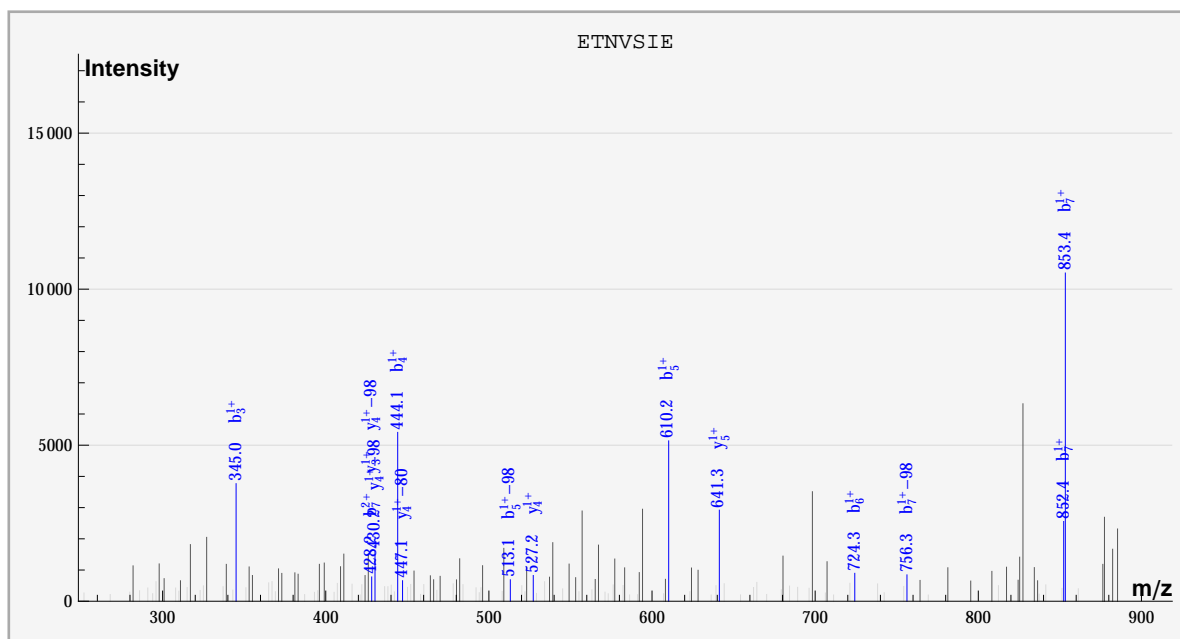

|   | # | b | b* | # | y | y* | P | P* |
|---|---|---|----|---|---|----|---|----|
| E | 1 |   |    |   |   |    |   |    |
| T | 2 |   |    | 6 |   |    |   |    |
| N | 3 | ✓ |    | 5 | ✓ |    |   |    |
| V | 4 | ✓ |    | 4 | ✓ | ✓  |   |    |
| S | 5 | ✓ | ✓  | 3 | ✓ |    |   |    |
| I | 6 | ✓ |    | 2 |   |    |   |    |
| E | 7 | ✓ | ✓  | 1 |   |    |   |    |





dbValid true ETNVSIE PHOS(1) 1. 872. -0.655555 5.2888 100. ? 2244.  
 S\_Acido\_new%gi|68567258|gb|AAY80187.1| ETNVSIE%::::PHOS:::sample\_0%compd\_831

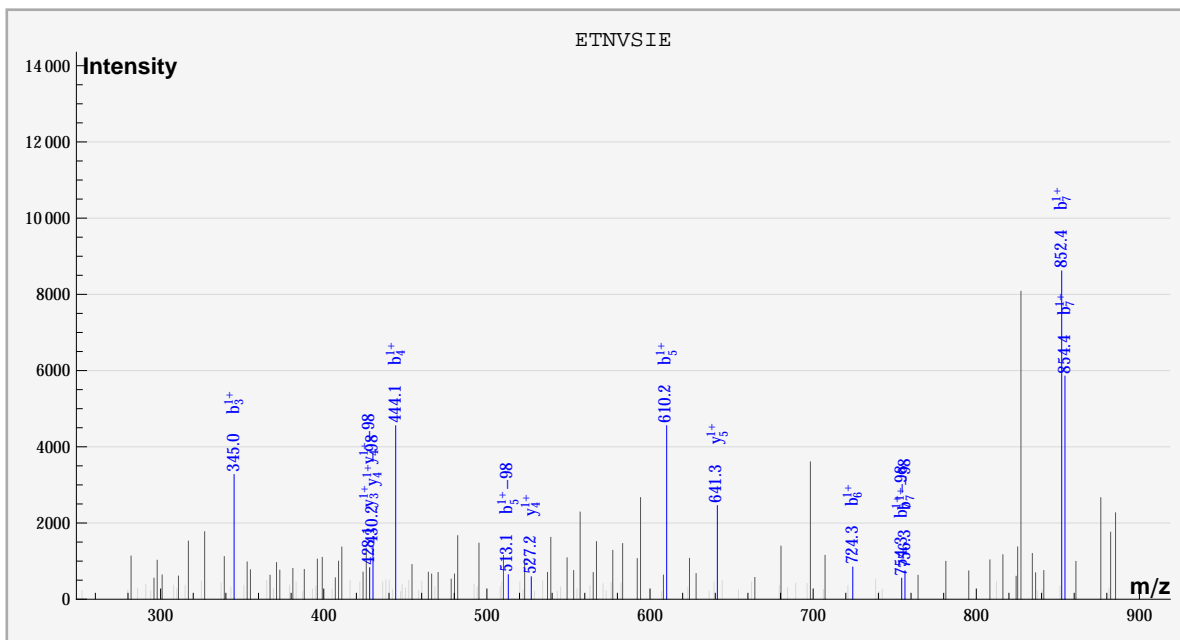

|   | # | b | b* | # | y | y* | P | P* |
|---|---|---|----|---|---|----|---|----|
| E | 1 |   |    |   |   |    |   |    |
| T | 2 |   |    | 6 |   |    |   |    |
| N | 3 | ✓ |    | 5 | ✓ |    |   |    |
| V | 4 | ✓ |    | 4 | ✓ | ✓  |   |    |
| S | 5 | ✓ | ✓  | 3 | ✓ |    |   |    |
| I | 6 | ✓ |    | 2 |   |    |   |    |
| E | 7 | ✓ | ✓  | 1 |   |    |   |    |

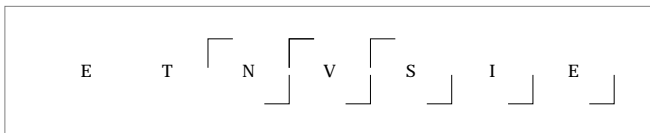

dbValid true YTTIGR PHOS(2) 1. 872. -1.68423 5.8289 100. ? 2352.  
 S\_Acido\_new%gi|68567813|gb|AAy80742.1| YTTIGR%::PHOS:PHOS:::%sample\_0%compd\_923

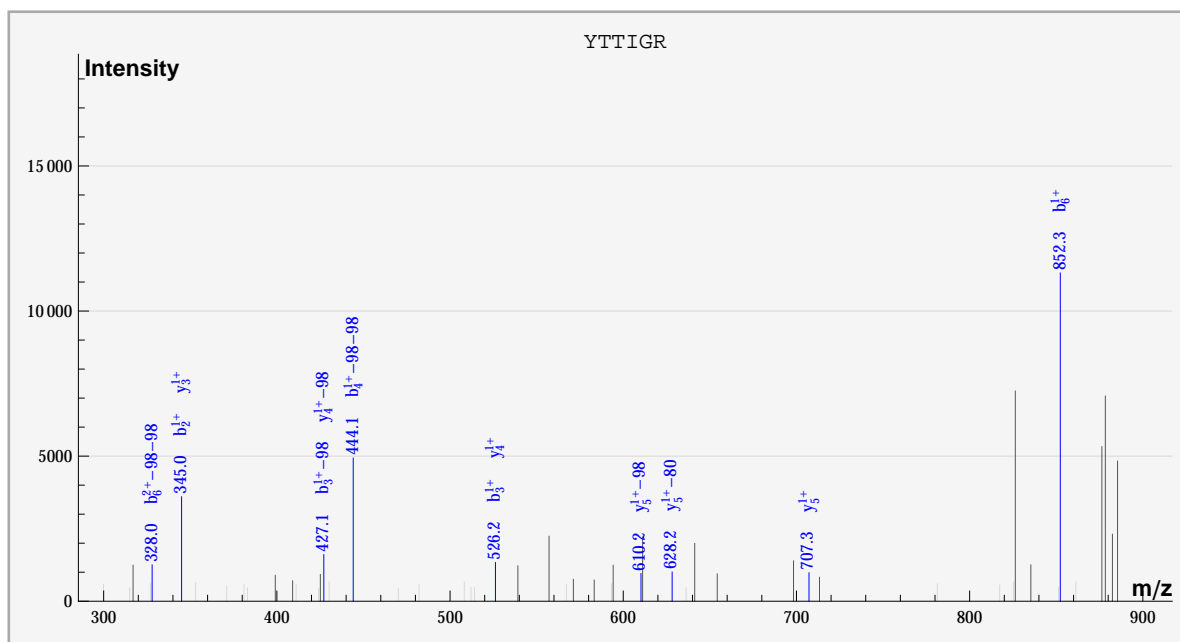

|   | # | b | b* | # | y | y* | P | P* |
|---|---|---|----|---|---|----|---|----|
| Y | 1 |   |    |   |   |    |   |    |
| T | 2 | ✓ |    | 5 | ✓ | ✓  |   |    |
| T | 3 | ✓ | ✓  | 4 | ✓ | ✓  |   |    |
| I | 4 |   | ✓  | 3 | ✓ |    |   |    |
| G | 5 |   |    | 2 |   |    |   |    |
| R | 6 | ✓ | ✓  | 1 |   |    |   |    |

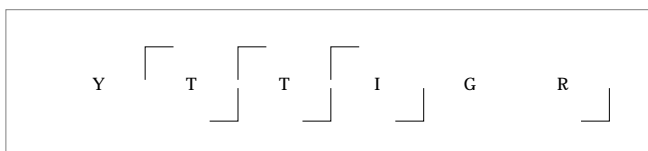

dbValid true YTTIGR PHOS(2) 1. 872. -1.68423 5.72067 100. ? 2364.

S\_Acido\_new%gi|68567813|gb|AAy80742.1| YTTIGR%::PHOS:PHOS:::%sample\_0%compd\_933

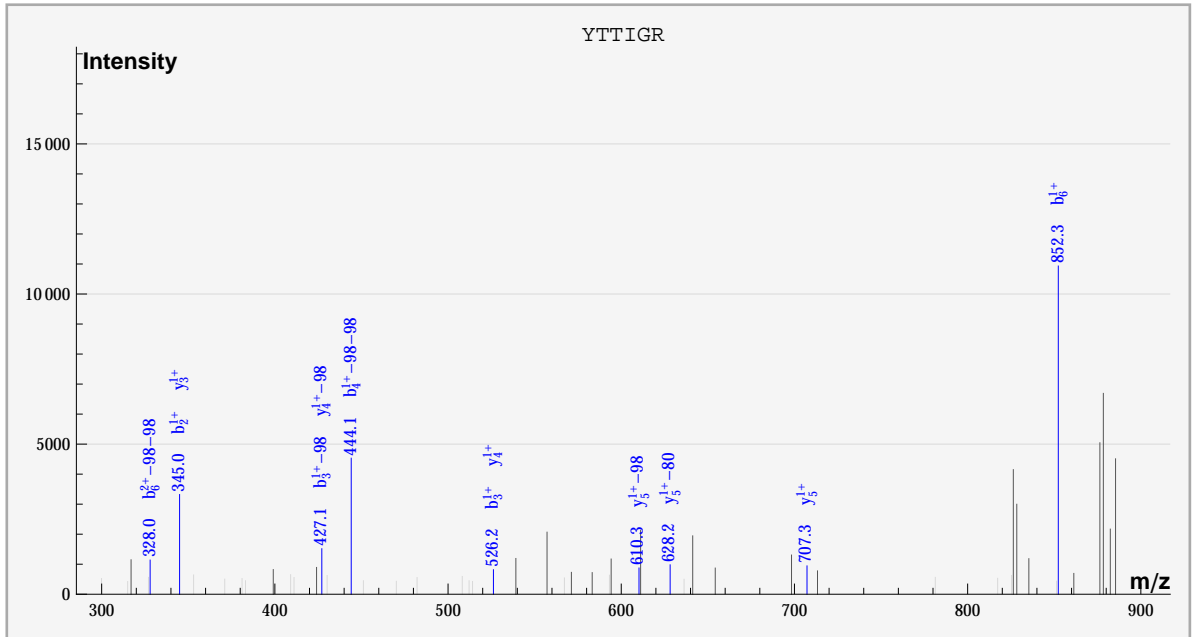

|   | # | b | b* | # | y | y* | P | P* |
|---|---|---|----|---|---|----|---|----|
| Y | 1 |   |    |   |   |    |   |    |
| T | 2 | ✓ |    | 5 | ✓ | ✓  |   |    |
| T | 3 | ✓ | ✓  | 4 | ✓ | ✓  |   |    |
| I | 4 |   | ✓  | 3 | ✓ |    |   |    |
| G | 5 |   |    | 2 |   |    |   |    |
| R | 6 | ✓ | ✓  | 1 |   |    |   |    |

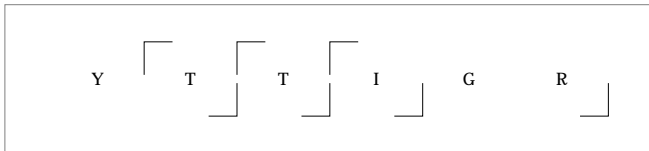

dbValid true YTTIGR PHOS(2) 1. 872. -1.68423 6.07686 100. ? 2376.

S\_Acido\_new%gi|68567813|gb|AAy80742.1| YTTIGR%::PHOS:PHOS:::sample\_0%compd\_943

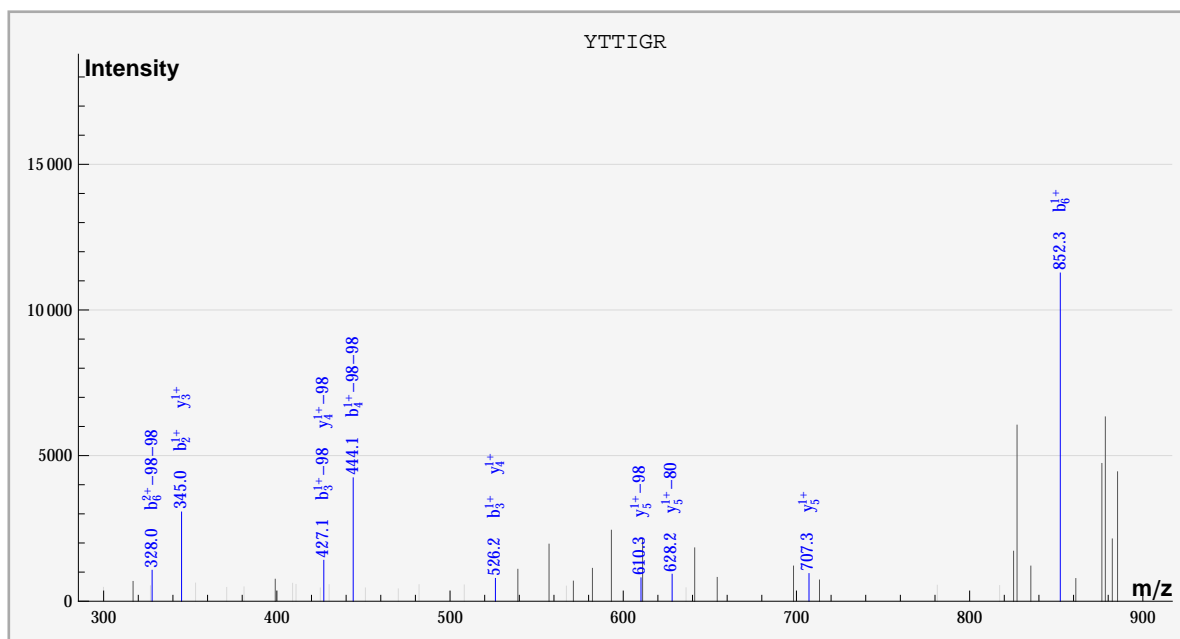

|   | # | b | b* | # | y | y* | P | P* |
|---|---|---|----|---|---|----|---|----|
| Y | 1 |   |    |   |   |    |   |    |
| T | 2 | ✓ |    | 5 | ✓ | ✓  |   |    |
| T | 3 | ✓ | ✓  | 4 | ✓ | ✓  |   |    |
| I | 4 |   | ✓  | 3 | ✓ |    |   |    |
| G | 5 |   |    | 2 |   |    |   |    |
| R | 6 | ✓ | ✓  | 1 |   |    |   |    |

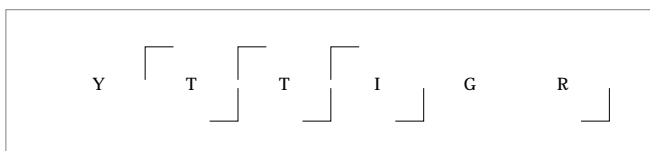

dbValid true YTTIGR PHOS(2) 1. 872. -1.68423 5.8895 100. ? 2388.  
 S\_Acido\_new%gi|68567813|gb|AAY80742.1| YTTIGR%::PHOS:PHOS:::%sample\_0%compd\_953

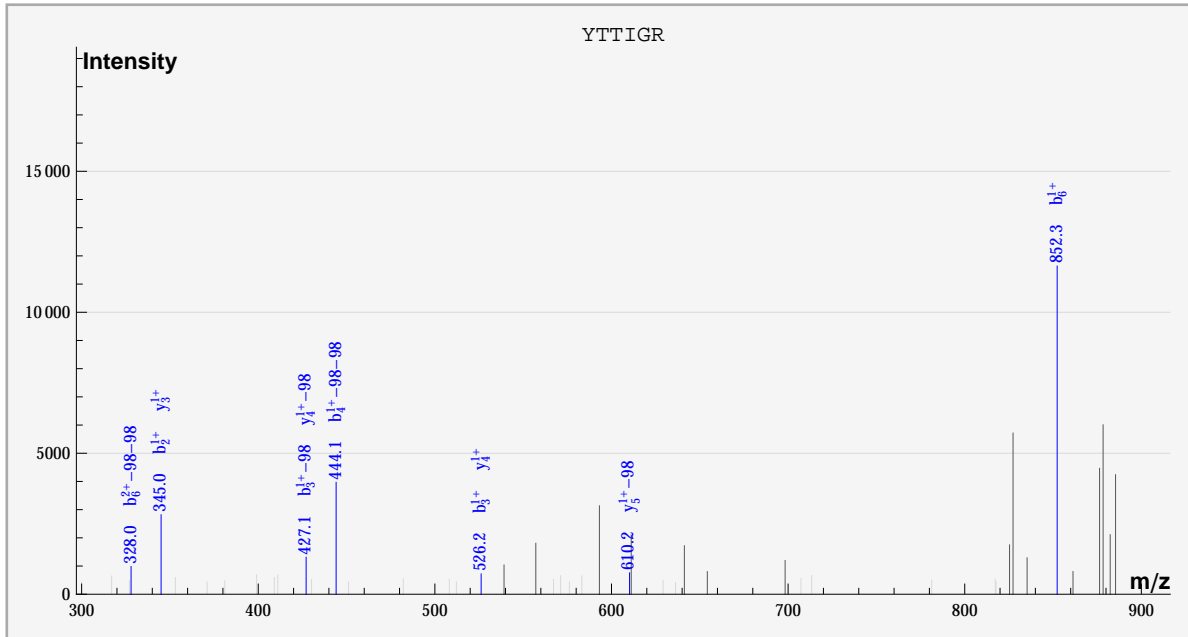

|   | # | b | b* | # | y | y* | P | P* |
|---|---|---|----|---|---|----|---|----|
| Y | 1 |   |    |   |   |    |   |    |
| T | 2 | ✓ |    | 5 |   | ✓  |   |    |
| T | 3 | ✓ | ✓  | 4 | ✓ | ✓  |   |    |
| I | 4 |   | ✓  | 3 | ✓ |    |   |    |
| G | 5 |   |    | 2 |   |    |   |    |
| R | 6 | ✓ | ✓  | 1 |   |    |   |    |



dbValid true LSSGSVLK PHOS(1) 1. 872. -1.56681 5.29065 100. ? 2496.  
 S\_Acido\_new%gi|68566592|gb|AAY79521.1| LSSGSVLK%::::PHOS::::%sample\_0%compd\_1046

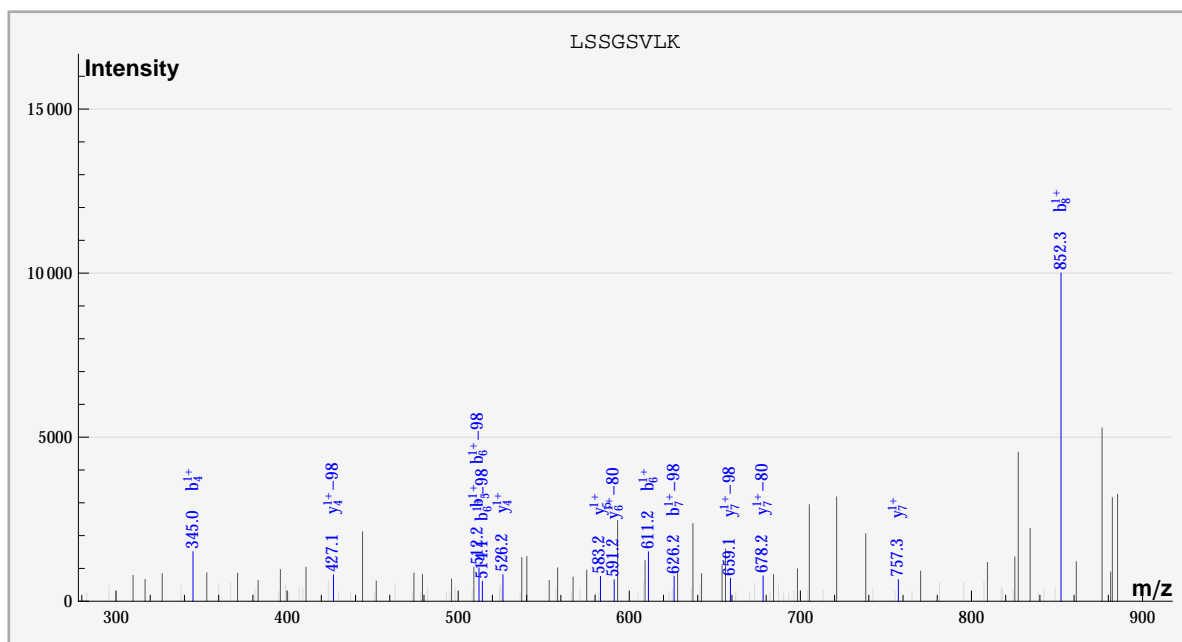

|   | # | b | b* | # | y | y* | P | P* |
|---|---|---|----|---|---|----|---|----|
| L | 1 |   |    |   |   |    |   |    |
| S | 2 |   |    | 7 | ✓ | ✓  |   |    |
| S | 3 |   |    | 6 |   | ✓  |   |    |
| G | 4 | ✓ |    | 5 | ✓ |    |   |    |
| S | 5 | ✓ |    | 4 | ✓ | ✓  |   |    |
| V | 6 | ✓ | ✓  | 3 |   |    |   |    |
| L | 7 |   | ✓  | 2 |   |    |   |    |
| K | 8 | ✓ |    | 1 |   |    |   |    |

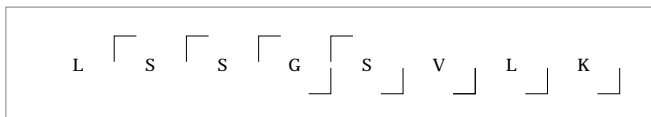

dbValid true LSSGSVLK PHOS(1) 1. 872. -1.56681 6.2388 100. ? 2508.  
 S\_Acido\_new%gi|68566592|gb|AA79521.1| LSSGSVLK%:::PHOS:::%sample\_0%compd\_1056

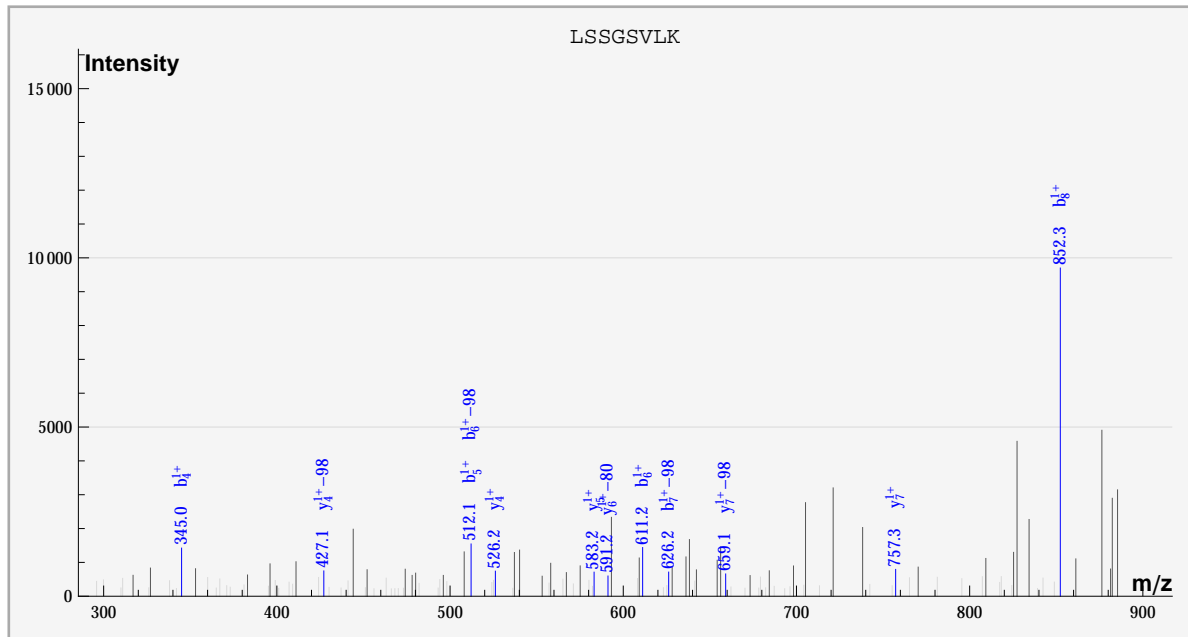

|   | # | b | b* | # | y | y* | P | P* |
|---|---|---|----|---|---|----|---|----|
| L | 1 |   |    |   |   |    |   |    |
| S | 2 |   |    | 7 | ✓ | ✓  |   |    |
| S | 3 |   |    | 6 |   | ✓  |   |    |
| G | 4 | ✓ |    | 5 | ✓ |    |   |    |
| S | 5 | ✓ |    | 4 | ✓ | ✓  |   |    |
| V | 6 | ✓ | ✓  | 3 |   |    |   |    |
| L | 7 |   | ✓  | 2 |   |    |   |    |
| K | 8 | ✓ |    | 1 |   |    |   |    |

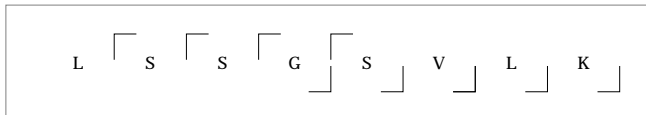

dbValid true LSSGSVLK PHOS(1) 1. 872. -1.56681 5.39333 100. ? 2520.  
 S\_Acido\_new%gi|68566592|gb|AAY79521.1| LSSGSVLK%:::PHOS:::%sample\_0%compd\_1066

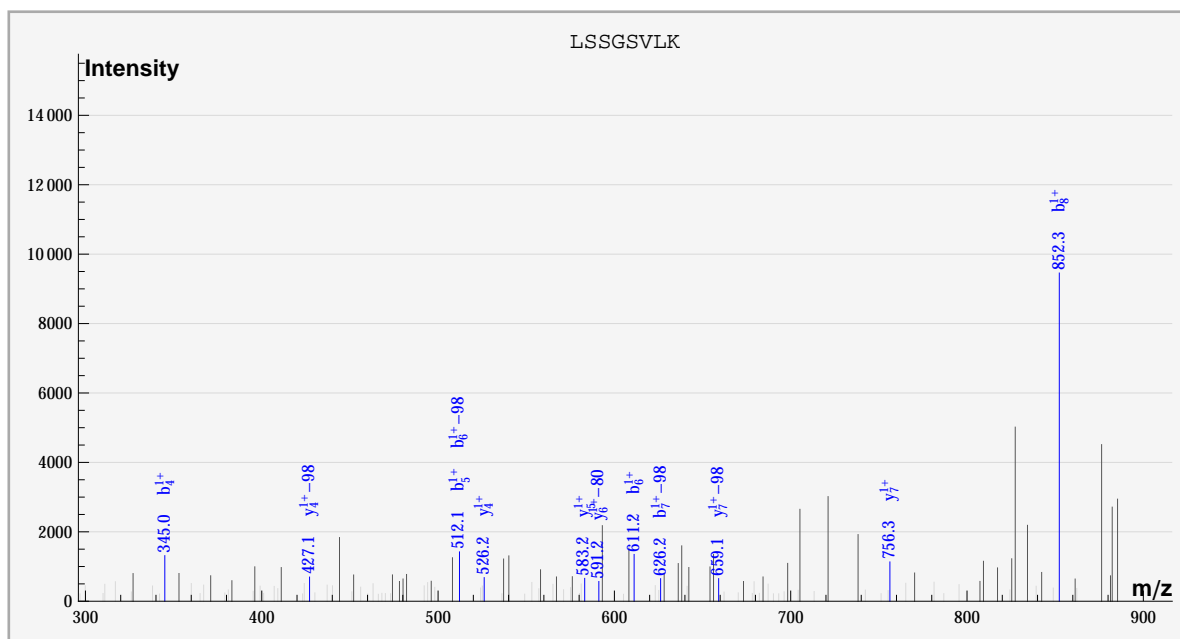

|   | # | b | b* | # | y | y* | P | P* |
|---|---|---|----|---|---|----|---|----|
| L | 1 |   |    |   |   |    |   |    |
| S | 2 |   |    | 7 | ✓ | ✓  |   |    |
| S | 3 |   |    | 6 |   | ✓  |   |    |
| G | 4 | ✓ |    | 5 | ✓ |    |   |    |
| S | 5 | ✓ |    | 4 | ✓ | ✓  |   |    |
| V | 6 | ✓ | ✓  | 3 |   |    |   |    |
| L | 7 |   | ✓  | 2 |   |    |   |    |
| K | 8 | ✓ |    | 1 |   |    |   |    |

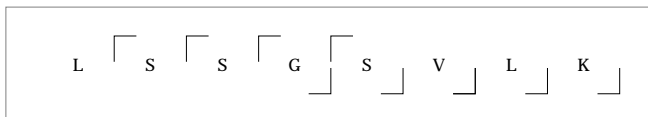



dbValid true LSSGSVLK PHOS(1) 1. 872. -1.56681 5.27557 100. ? 2532.  
 S\_Acido\_new%gi|68566592|gb|AAY79521.1| LSSGSVLK%:::PHOS:::sample\_0%compd\_1075

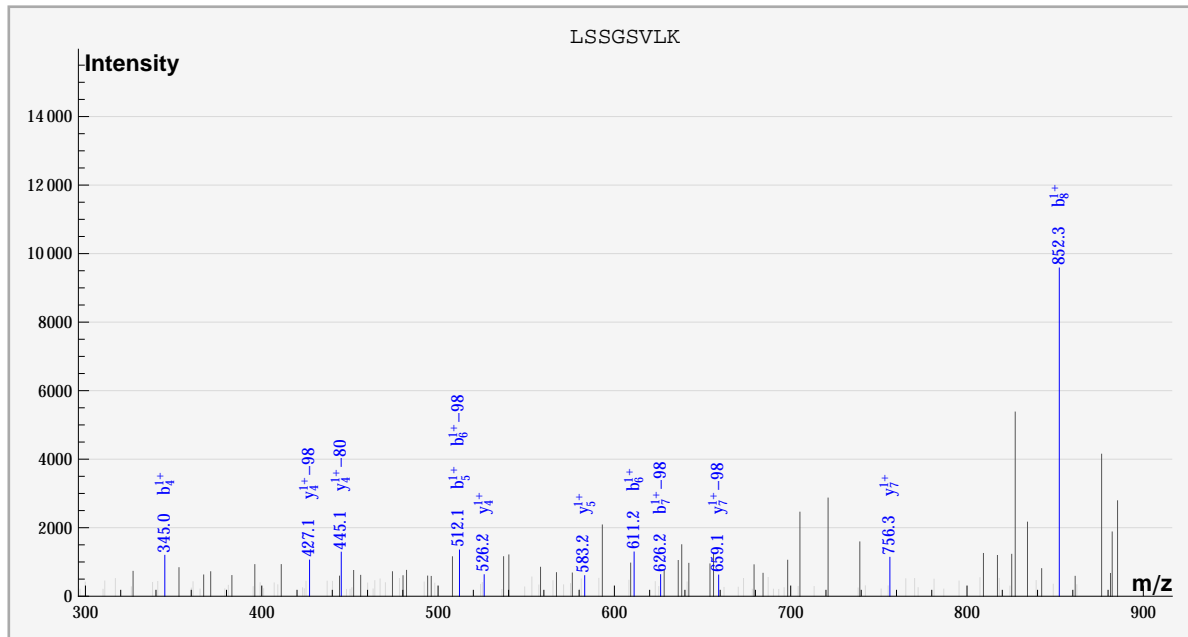

|   | # | b | b* | # | y | y* | P | P* |
|---|---|---|----|---|---|----|---|----|
| L | 1 |   |    |   |   |    |   |    |
| S | 2 |   |    | 7 | ✓ | ✓  |   |    |
| S | 3 |   |    | 6 |   |    |   |    |
| G | 4 | ✓ |    | 5 | ✓ |    |   |    |
| S | 5 | ✓ |    | 4 | ✓ | ✓  |   |    |
| V | 6 | ✓ | ✓  | 3 |   |    |   |    |
| L | 7 |   | ✓  | 2 |   |    |   |    |
| K | 8 | ✓ |    | 1 |   |    |   |    |

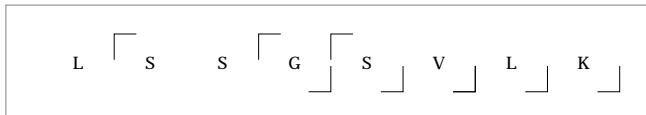

dbValid true RARVAMLYLETNK Oxidation\_M(1),PHOS(2) 2. 872. -1.10121 5.07782 100. ? 4734.  
 S\_Acido\_new%gi|68567271|gb|AA80200.1| RARVAMLYLETNK%:::Oxidation\_M::PHOS::PHOS:::sample\_2%compd\_3182

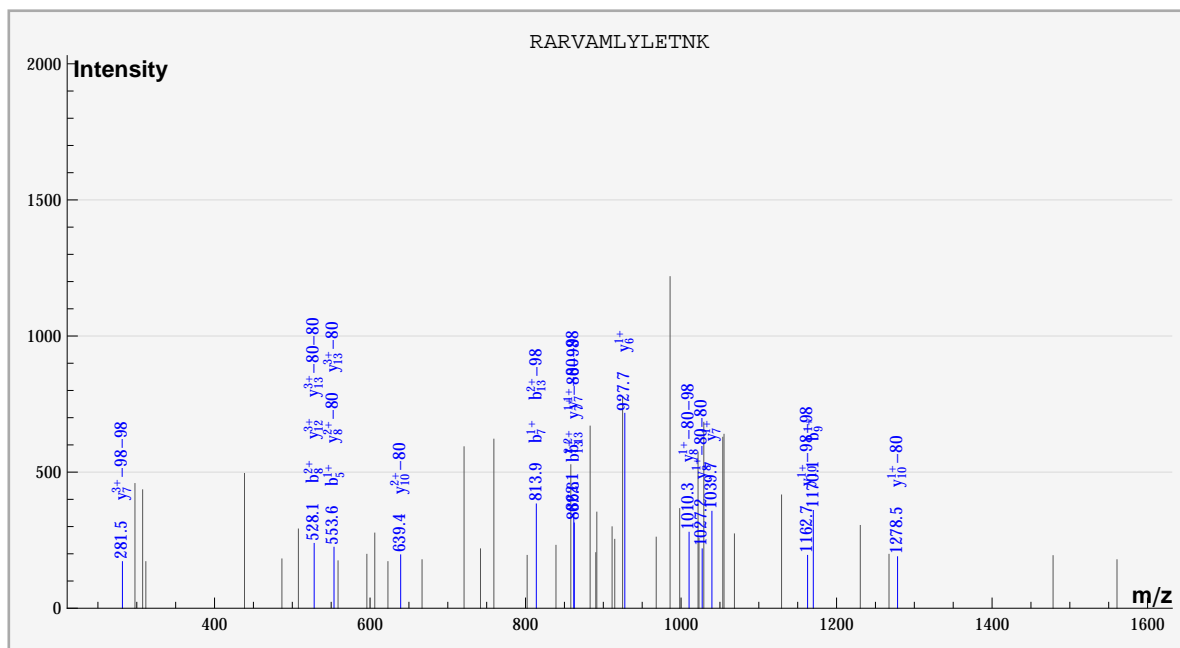

|   | #  | b | b* | #  | y | y* | P | P* |
|---|----|---|----|----|---|----|---|----|
| R | 1  |   |    |    |   |    |   | ✓  |
| A | 2  |   |    | 12 | ✓ |    |   |    |
| R | 3  |   |    | 11 |   |    |   |    |
| V | 4  |   |    | 10 |   | ✓  |   |    |
| A | 5  | ✓ |    | 9  |   |    |   |    |
| M | 6  |   |    | 8  |   | ✓  |   |    |
| L | 7  | ✓ |    | 7  | ✓ | ✓  |   |    |
| Y | 8  | ✓ |    | 6  | ✓ |    |   |    |
| L | 9  | ✓ |    | 5  |   |    |   |    |
| E | 10 |   |    | 4  |   |    |   |    |
| T | 11 |   |    | 3  |   |    |   |    |
| N | 12 |   |    | 2  |   |    |   |    |
| K | 13 | ✓ | ✓  | 1  |   |    |   |    |

[R][A][R][V][A][M][L][Y][L][E][T][N][K]

dbValid true LSYLSK PHOS(2) 1. 872. -1.65908 5.03288 100. ? 5382.  
 S\_Acido\_new%gi|68568532|gb|AAY81461.1| S\_Acido\_new%gi|68568535|gb|AAY81464.1|  
 LSYLSK%::PHOS::PHOS::%sample\_2%compd\_3762

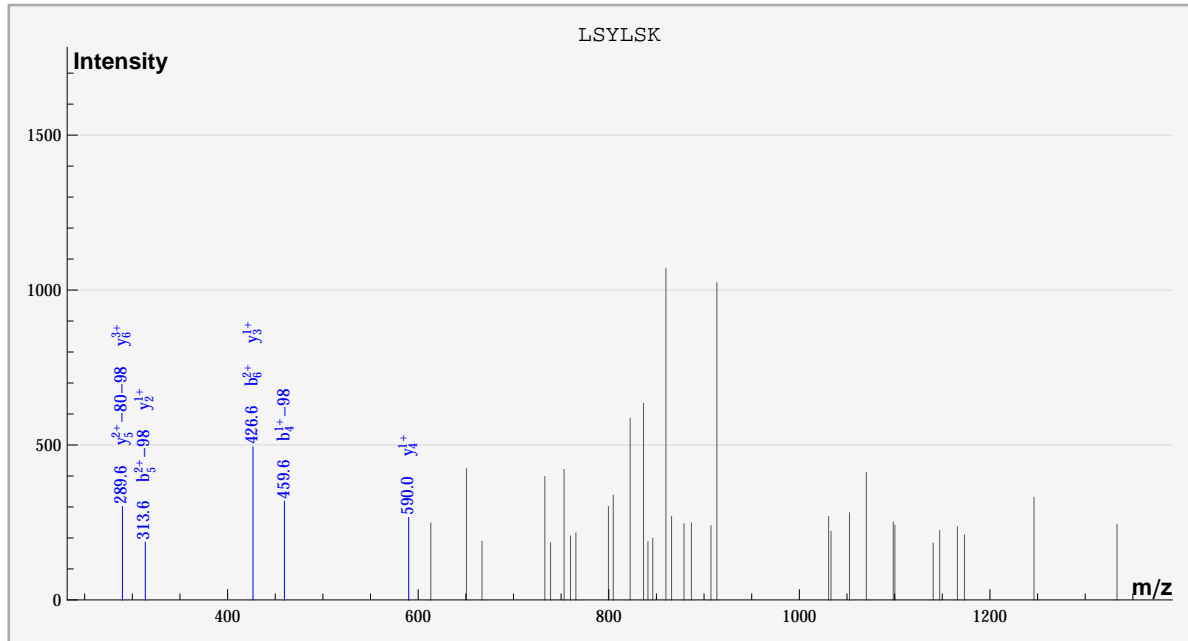

|   | # | b | b* | # | y | y* | P | P* |
|---|---|---|----|---|---|----|---|----|
| L | 1 |   |    |   |   |    | ✓ |    |
| S | 2 |   |    | 5 |   | ✓  |   |    |
| Y | 3 |   |    | 4 |   | ✓  |   |    |
| L | 4 | ✓ |    | 3 |   | ✓  |   |    |
| S | 5 | ✓ |    | 2 |   | ✓  |   |    |
| K | 6 | ✓ |    | 1 |   |    |   |    |

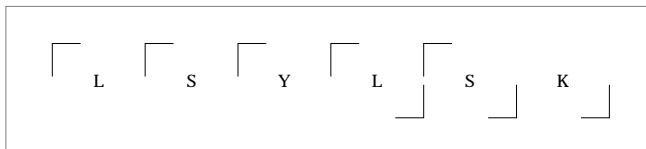

dbConflictWinner true ETNVSIE PHOS(1) 1. 873. -1.65556 5.62735 100. ?  
 2004. S\_Acido\_new%gi|68567258|gb|AAY80187.1| ETNVSIE%::::PHOS:::sample\_0%compd\_628

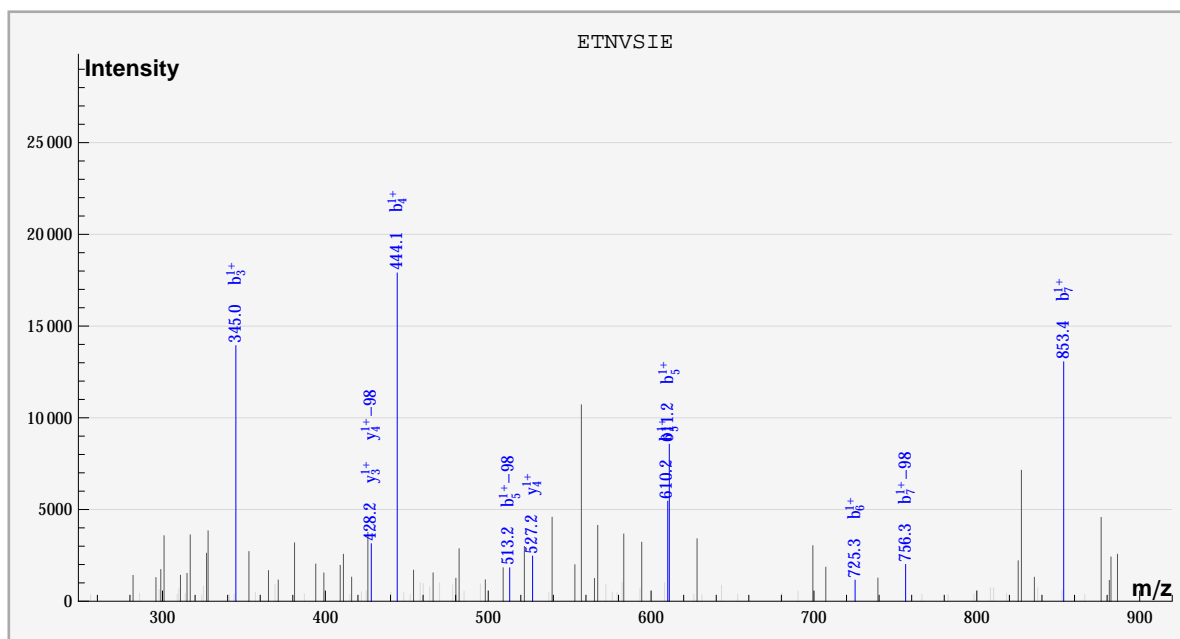

|   | # | b | b* | # | y | y* | P | P* |
|---|---|---|----|---|---|----|---|----|
| E | 1 |   |    |   |   |    |   |    |
| T | 2 |   |    | 6 |   |    |   |    |
| N | 3 | ✓ |    | 5 |   |    |   |    |
| V | 4 | ✓ |    | 4 | ✓ | ✓  |   |    |
| S | 5 | ✓ | ✓  | 3 | ✓ |    |   |    |
| I | 6 | ✓ |    | 2 |   |    |   |    |
| E | 7 | ✓ | ✓  | 1 |   |    |   |    |

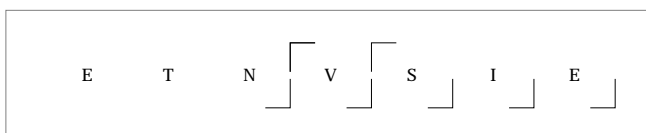

dbConflictWinner true YLGITPK PHOS(1) 1. 873. -1.56754 5.55579 100. ?  
 2052. S\_Acido\_new%gi68568042|gb|AAY80971.1| YLGITPK%:PHOS::::::%sample\_0%cmpd\_667

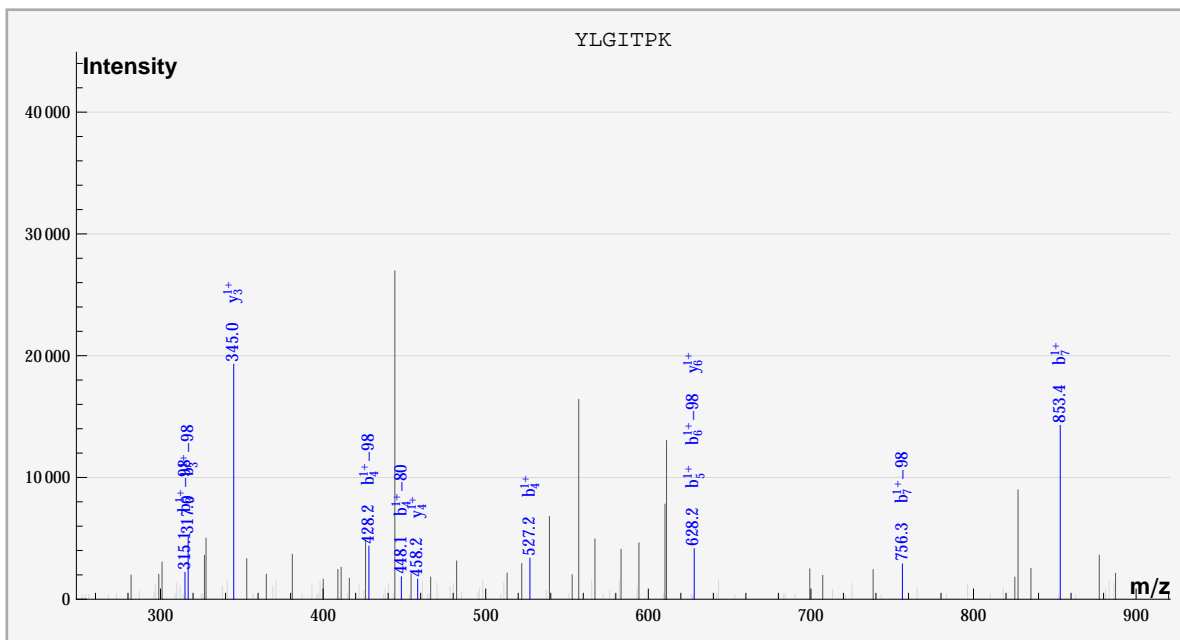

|   | # | b | b* | # | y | y* | P | P* |
|---|---|---|----|---|---|----|---|----|
| Y | 1 |   |    |   |   |    |   |    |
| L | 2 |   |    | 6 | ✓ |    |   |    |
| G | 3 | ✓ | ✓  | 5 |   |    |   |    |
| I | 4 | ✓ | ✓  | 4 | ✓ |    |   |    |
| T | 5 | ✓ |    | 3 | ✓ |    |   |    |
| P | 6 |   | ✓  | 2 |   |    |   |    |
| K | 7 | ✓ | ✓  | 1 |   |    |   |    |

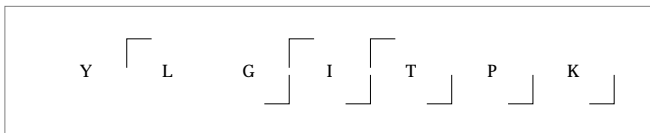

dbConflictWinner true ETNVSIE PHOS(1) 1. 873. -1.65556 5.6948 100. ?  
 2076. S\_Acido\_new%gi|68567258|gb|AAY80187.1| ETNVSIE%::::PHOS:::sample\_0%compd\_688

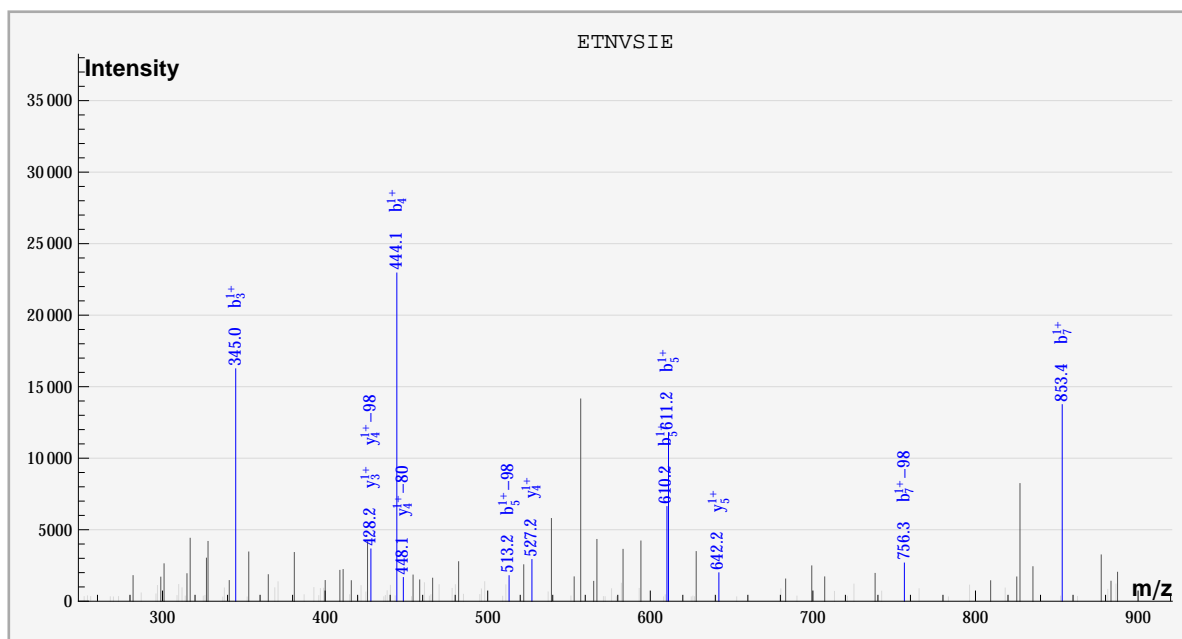

|   | # | b | b* | # | y | y* | P | P* |
|---|---|---|----|---|---|----|---|----|
| E | 1 |   |    |   |   |    |   |    |
| T | 2 |   |    | 6 |   |    |   |    |
| N | 3 | ✓ |    | 5 | ✓ |    |   |    |
| V | 4 | ✓ |    | 4 | ✓ | ✓  |   |    |
| S | 5 | ✓ | ✓  | 3 | ✓ |    |   |    |
| I | 6 |   |    | 2 |   |    |   |    |
| E | 7 | ✓ | ✓  | 1 |   |    |   |    |

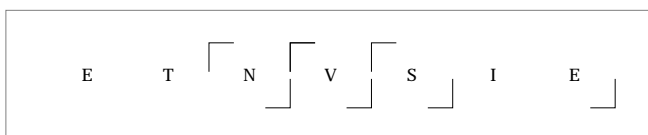

dbConflictWinner true ETNVSIE PHOS(1) 1. 873. -1.65556 6.1527 100. ?  
 2088. S\_Acido\_new%gi|68567258|gb|AAY80187.1| ETNVSIE%::::PHOS:::sample\_0%cmpd\_698

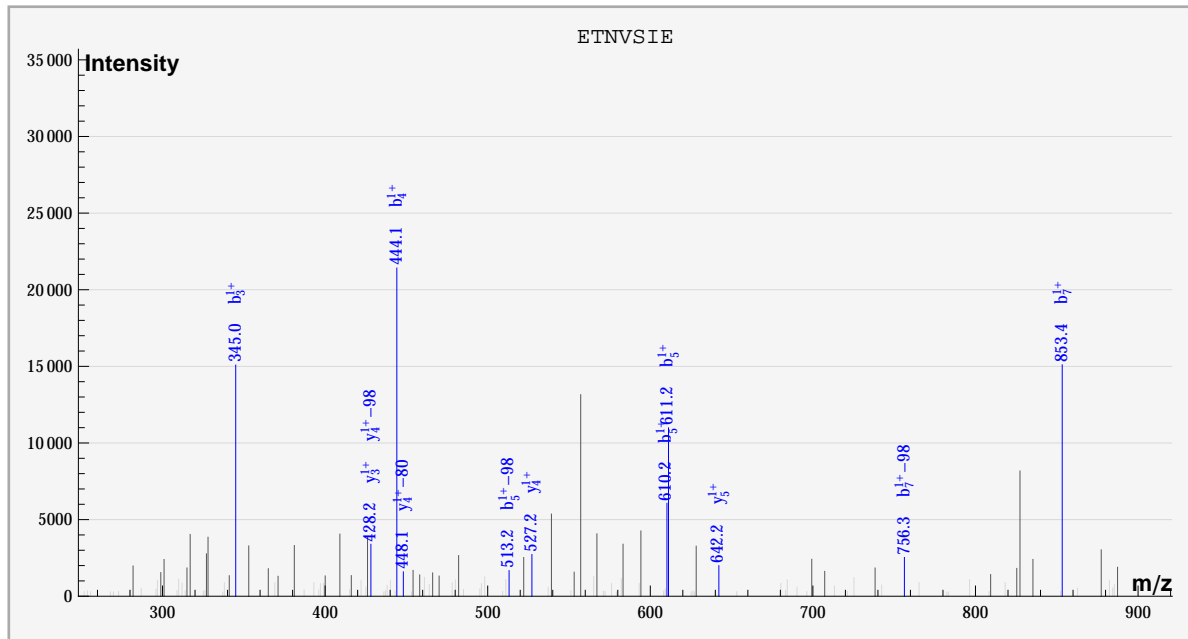

|   | # | b | b* | # | y | y* | P | P* |
|---|---|---|----|---|---|----|---|----|
| E | 1 |   |    |   |   |    |   |    |
| T | 2 |   |    | 6 |   |    |   |    |
| N | 3 | ✓ |    | 5 | ✓ |    |   |    |
| V | 4 | ✓ |    | 4 | ✓ | ✓  |   |    |
| S | 5 | ✓ | ✓  | 3 | ✓ |    |   |    |
| I | 6 |   |    | 2 |   |    |   |    |
| E | 7 | ✓ | ✓  | 1 |   |    |   |    |

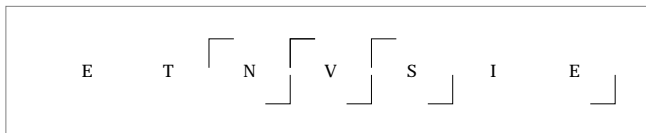

dbConflictWinner true ETNVSIE PHOS(1) 1. 873. -1.65556 6.36599 100. ?  
 2100. S\_Acido\_new%gi|68567258|gb|AAY80187.1| ETNVSIE%::::PHOS:::sample\_0%compd\_709

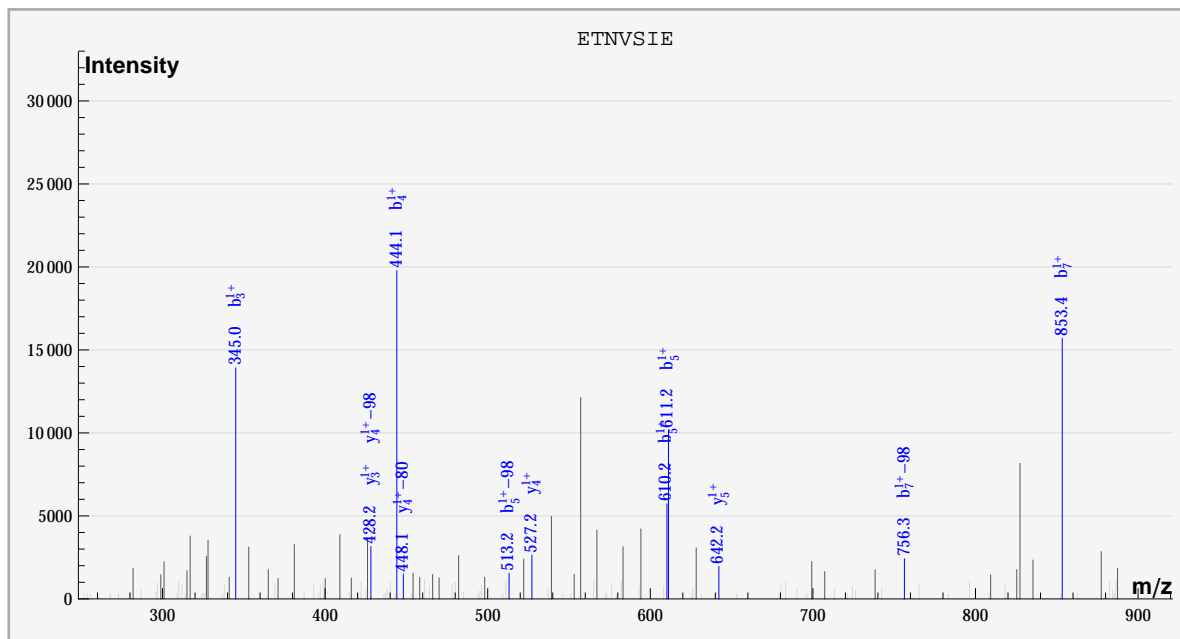

|   | # | b | b* | # | y | y* | P | P* |
|---|---|---|----|---|---|----|---|----|
| E | 1 |   |    |   |   |    |   |    |
| T | 2 |   |    | 6 |   |    |   |    |
| N | 3 | ✓ |    | 5 | ✓ |    |   |    |
| V | 4 | ✓ |    | 4 | ✓ | ✓  |   |    |
| S | 5 | ✓ | ✓  | 3 | ✓ |    |   |    |
| I | 6 |   |    | 2 |   |    |   |    |
| E | 7 | ✓ | ✓  | 1 |   |    |   |    |

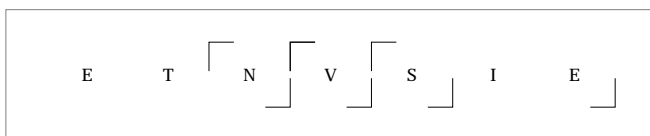



dbConflictWinner true ETNVSIE PHOS(1) 1. 873. -1.65556 6.30918 100. ?  
 2112. S\_Acido\_new%gi|68567258|gb|AAY80187.1| ETNVSIE%::::PHOS:::sample\_0%cmpd\_719

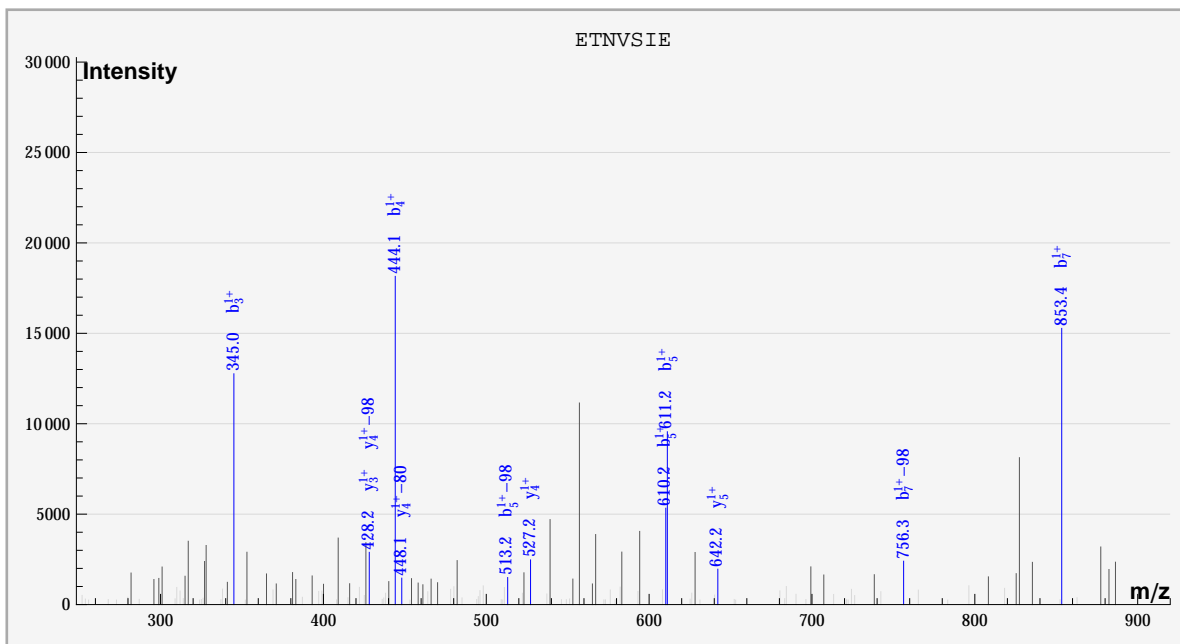

|   | # | b | b* | # | y | y* | P | P* |
|---|---|---|----|---|---|----|---|----|
| E | 1 |   |    |   |   |    |   |    |
| T | 2 |   |    | 6 |   |    |   |    |
| N | 3 | ✓ |    | 5 | ✓ |    |   |    |
| V | 4 | ✓ |    | 4 | ✓ | ✓  |   |    |
| S | 5 | ✓ | ✓  | 3 | ✓ |    |   |    |
| I | 6 |   |    | 2 |   |    |   |    |
| E | 7 | ✓ | ✓  | 1 |   |    |   |    |

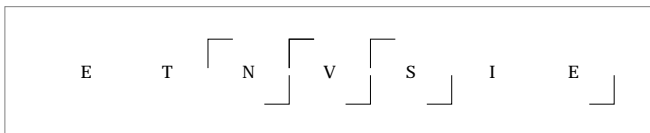

dbConflictWinner true ETNVSIE PHOS(1) 1. 873. -1.65556 6.08141 100. ?  
 2124. S\_Acido\_new%gi|68567258|gb|AAY80187.1| ETNVSIE%::::PHOS:::sample\_0%compd\_729

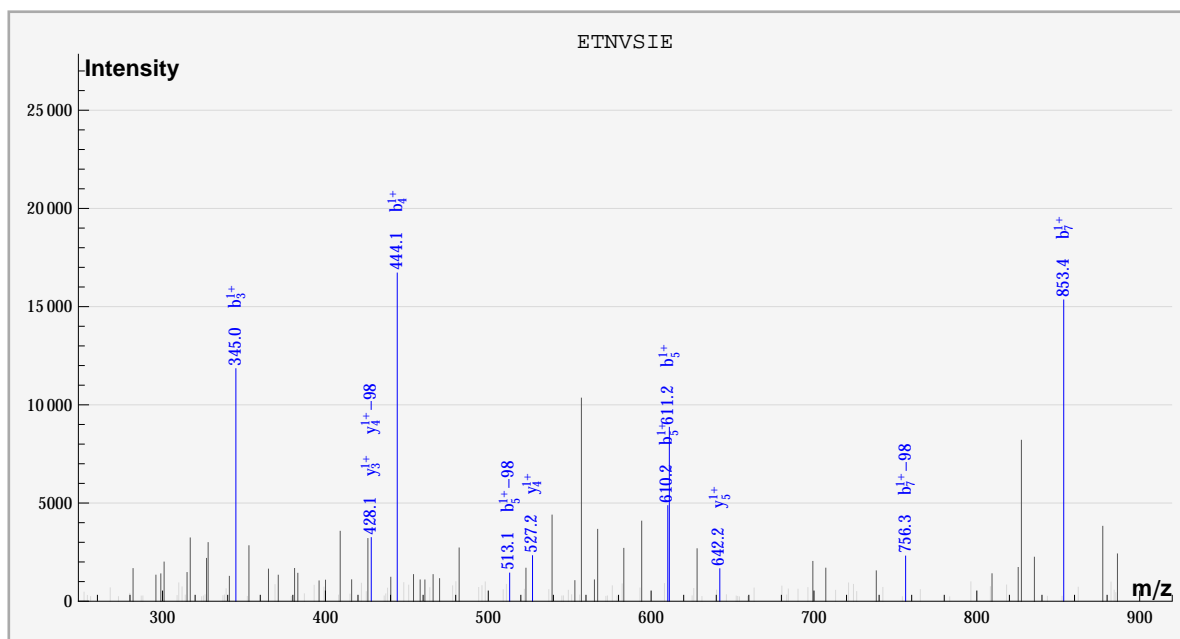

|   | # | b | b* | # | y | y* | P | P* |
|---|---|---|----|---|---|----|---|----|
| E | 1 |   |    |   |   |    |   |    |
| T | 2 |   |    | 6 |   |    |   |    |
| N | 3 | ✓ |    | 5 | ✓ |    |   |    |
| V | 4 | ✓ |    | 4 | ✓ | ✓  |   |    |
| S | 5 | ✓ | ✓  | 3 | ✓ |    |   |    |
| I | 6 |   |    | 2 |   |    |   |    |
| E | 7 | ✓ | ✓  | 1 |   |    |   |    |

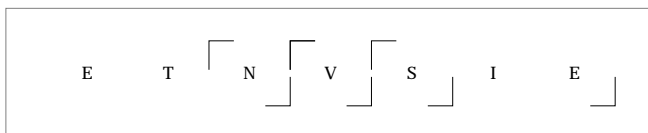

dbConflictWinner true ETNVSIE PHOS(1) 1. 873. -1.65556 6.11404 100. ?  
 2136. S\_Acido\_new%gi|68567258|gb|AAY80187.1| ETNVSIE%::::PHOS:::sample\_0%cmpd\_739

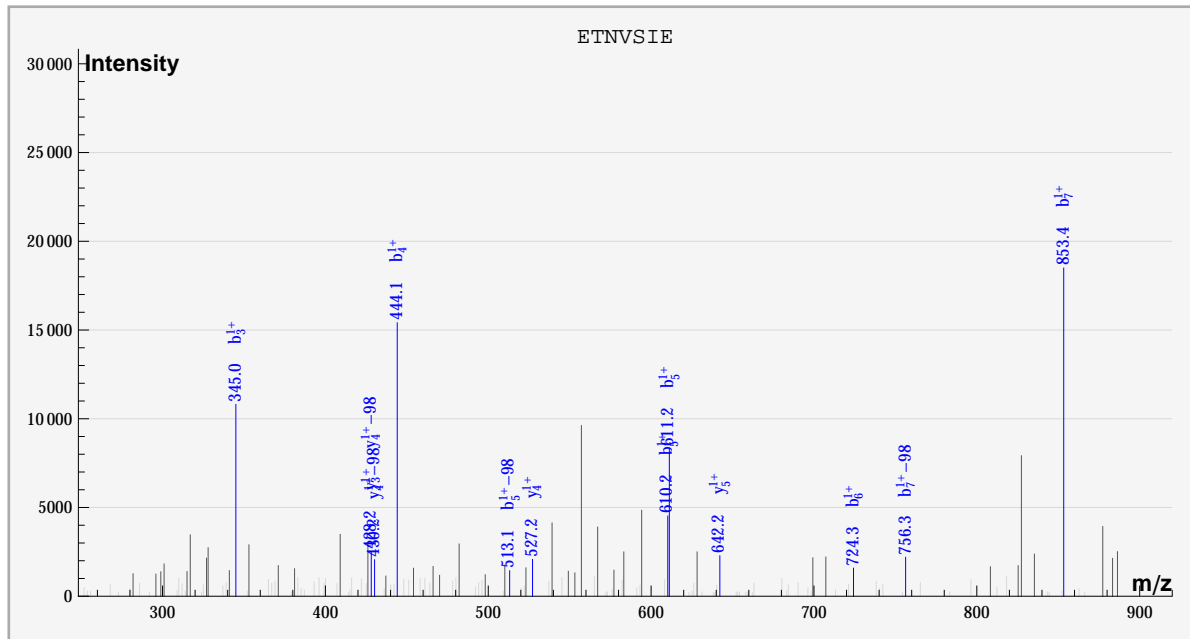

|   | # | b | b* | # | y | y* | P | P* |
|---|---|---|----|---|---|----|---|----|
| E | 1 |   |    |   |   |    |   |    |
| T | 2 |   |    | 6 |   |    |   |    |
| N | 3 | ✓ |    | 5 | ✓ |    |   |    |
| V | 4 | ✓ |    | 4 | ✓ | ✓  |   |    |
| S | 5 | ✓ | ✓  | 3 | ✓ |    |   |    |
| I | 6 | ✓ |    | 2 |   |    |   |    |
| E | 7 | ✓ | ✓  | 1 |   |    |   |    |

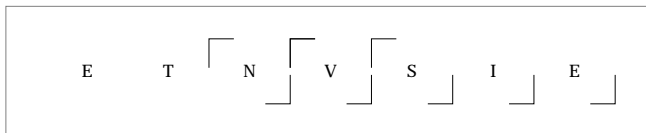

dbConflictWinner true ETNVSIE PHOS(1) 1. 873. -1.65556 6.18896 100. ?  
 2148. S\_Acido\_new%gi|68567258|gb|AAY80187.1| ETNVSIE%::::PHOS:::sample\_0%cmpd\_749

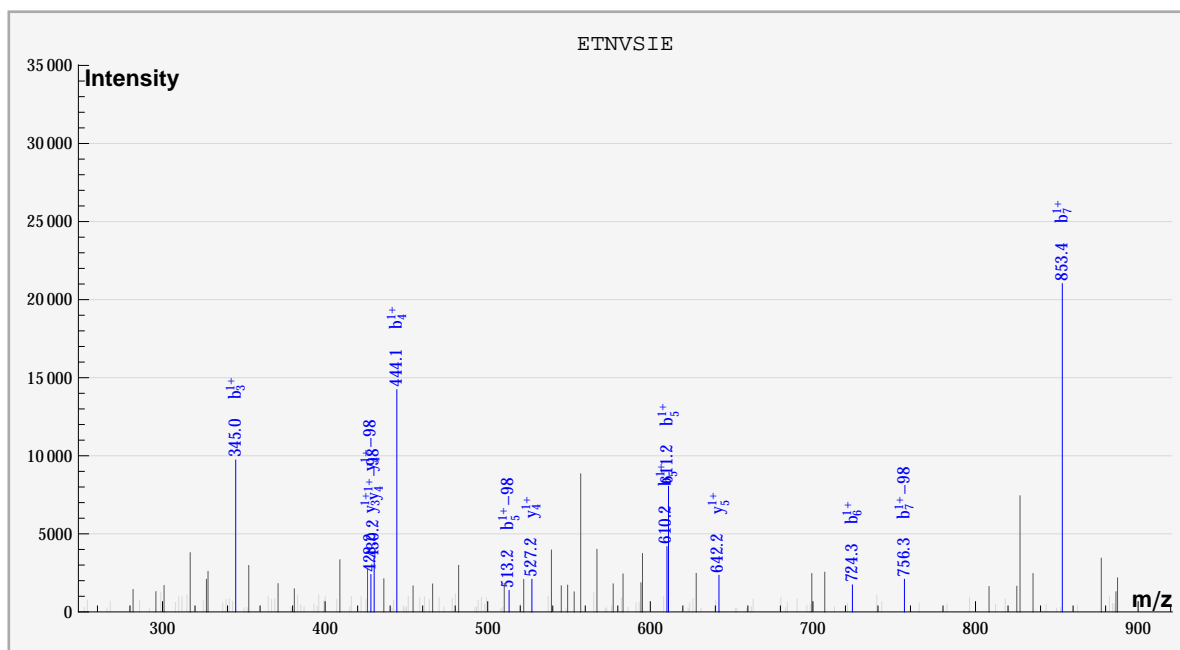

|   | # | b | b* | # | y | y* | P | P* |
|---|---|---|----|---|---|----|---|----|
| E | 1 |   |    |   |   |    |   |    |
| T | 2 |   |    | 6 |   |    |   |    |
| N | 3 | ✓ |    | 5 | ✓ |    |   |    |
| V | 4 | ✓ |    | 4 | ✓ | ✓  |   |    |
| S | 5 | ✓ | ✓  | 3 | ✓ |    |   |    |
| I | 6 | ✓ |    | 2 |   |    |   |    |
| E | 7 | ✓ | ✓  | 1 |   |    |   |    |

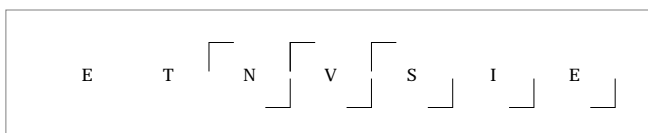

dbValid true ETNVSIE PHOS(1) 1. 873. -1.65556 5.59892 100. ? 2160.  
 S\_Acido\_new%gi|68567258|gb|AAY80187.1| ETNVSIE%::::PHOS:::sample\_0%compd\_759

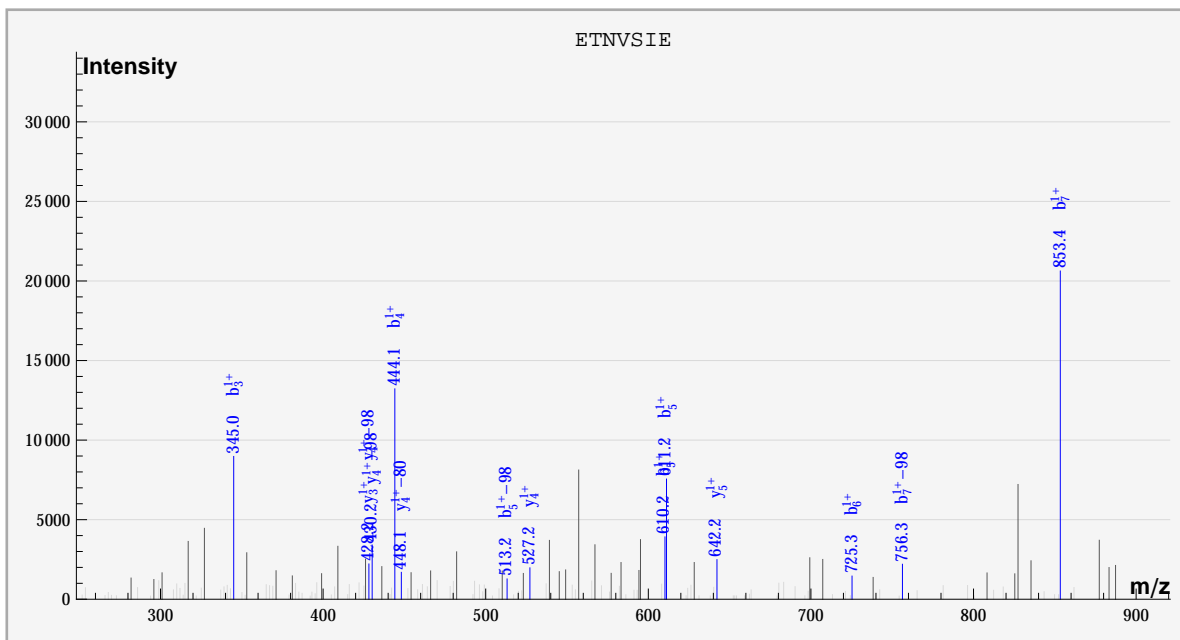

|   | # | b | b* | # | y | y* | P | P* |
|---|---|---|----|---|---|----|---|----|
| E | 1 |   |    |   |   |    |   |    |
| T | 2 |   |    | 6 |   |    |   |    |
| N | 3 | ✓ |    | 5 | ✓ |    |   |    |
| V | 4 | ✓ |    | 4 | ✓ | ✓  |   |    |
| S | 5 | ✓ | ✓  | 3 | ✓ |    |   |    |
| I | 6 | ✓ |    | 2 |   |    |   |    |
| E | 7 | ✓ | ✓  | 1 |   |    |   |    |



dbValid true ETNVSIE PHOS(1) 1. 873. -1.65556 5.4274 100. ? 2172.  
 S\_Acido\_new%gi|68567258|gb|AAY80187.1| ETNVSIE%::::PHOS:::sample\_0%compd\_769

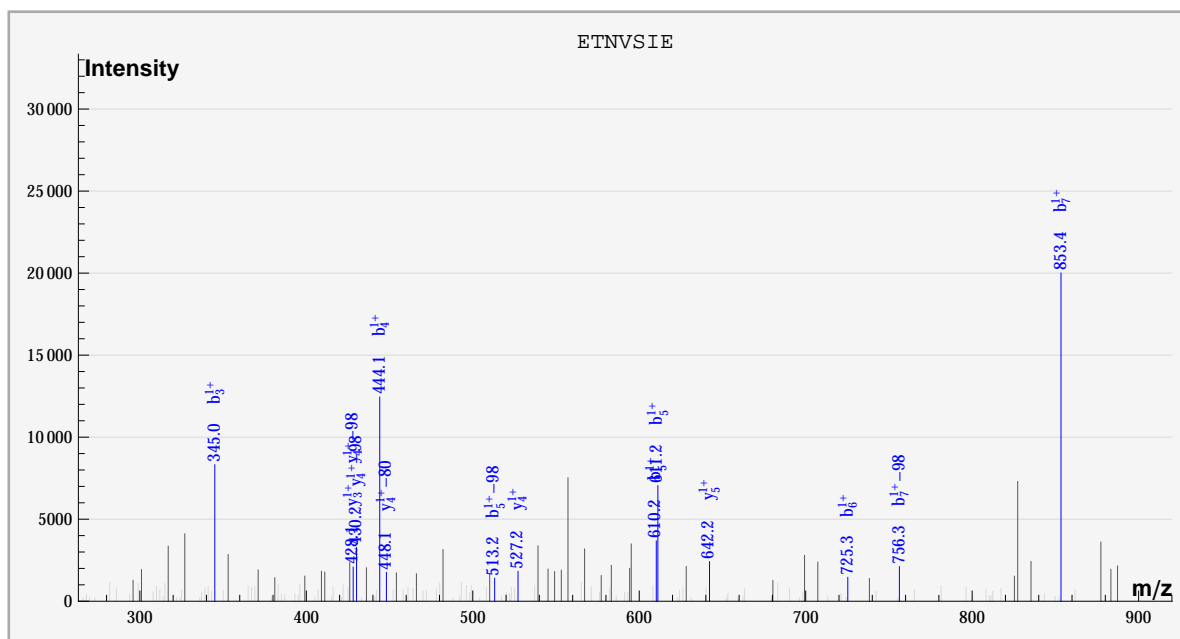

|   | # | b | b* | # | y | y* | P | P* |
|---|---|---|----|---|---|----|---|----|
| E | 1 |   |    |   |   |    |   |    |
| T | 2 |   |    | 6 |   |    |   |    |
| N | 3 | ✓ |    | 5 | ✓ |    |   |    |
| V | 4 | ✓ |    | 4 | ✓ | ✓  |   |    |
| S | 5 | ✓ | ✓  | 3 | ✓ |    |   |    |
| I | 6 | ✓ |    | 2 |   |    |   |    |
| E | 7 | ✓ | ✓  | 1 |   |    |   |    |

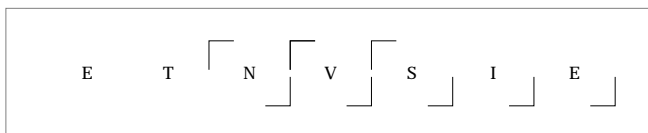

dbValid true ETNVSIE PHOS(1) 1. 873. -1.65556 5.77392 100. ? 2196.  
 S\_Acido\_new%gi|68567258|gb|AAY80187.1| ETNVSIE%::::PHOS:::sample\_0%compd\_791

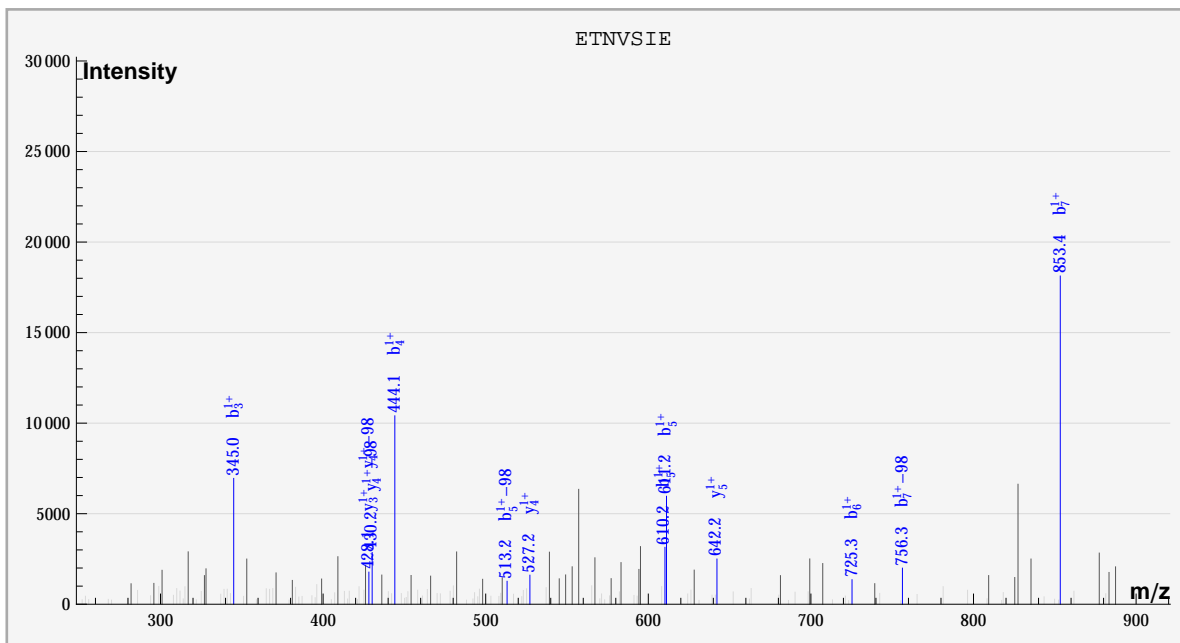

|   | # | b | b* | # | y | y* | P | P* |
|---|---|---|----|---|---|----|---|----|
| E | 1 |   |    |   |   |    |   |    |
| T | 2 |   |    | 6 |   |    |   |    |
| N | 3 | ✓ |    | 5 | ✓ |    |   |    |
| V | 4 | ✓ |    | 4 | ✓ | ✓  |   |    |
| S | 5 | ✓ | ✓  | 3 | ✓ |    |   |    |
| I | 6 | ✓ |    | 2 |   |    |   |    |
| E | 7 | ✓ | ✓  | 1 |   |    |   |    |

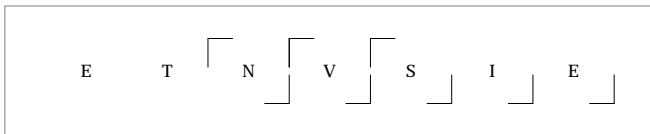

dbValid true ETNVSIE PHOS(1) 1. 873. -1.65556 5.45174 100. ? 2220.  
 S\_Acido\_new%gi68567258|gb|AAY80187.1| ETNVSIE%::::PHOS:::sample\_0%compd\_812

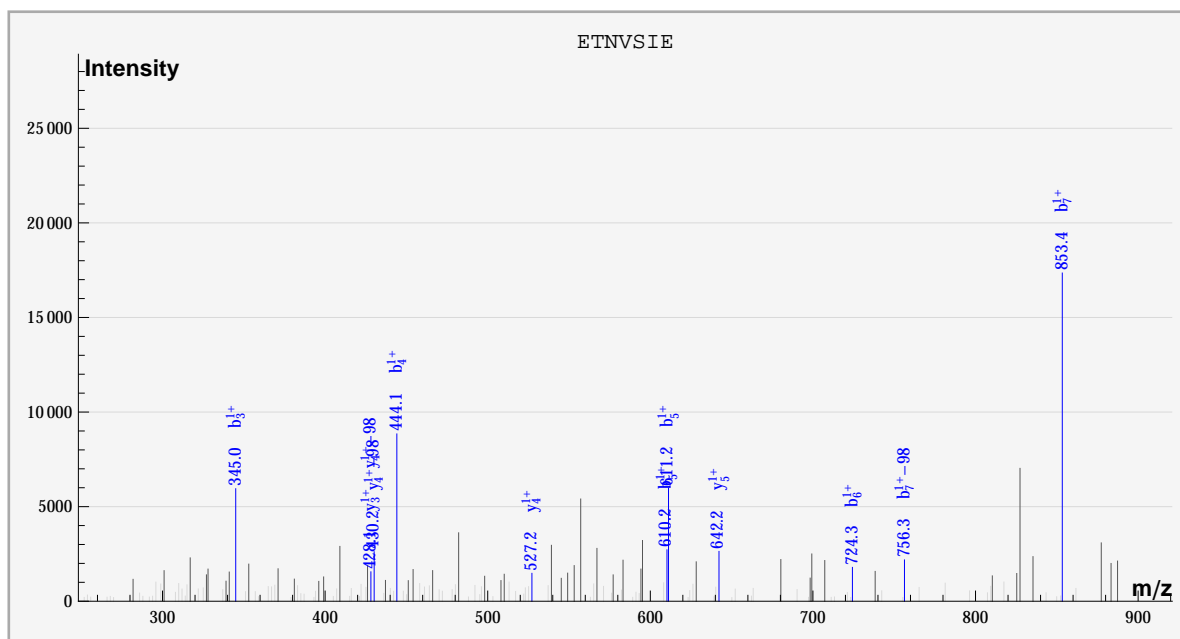

|   | # | b | b* | # | y | y* | P | P* |
|---|---|---|----|---|---|----|---|----|
| E | 1 |   |    |   |   |    |   |    |
| T | 2 |   |    | 6 |   |    |   |    |
| N | 3 | ✓ |    | 5 | ✓ |    |   |    |
| V | 4 | ✓ |    | 4 | ✓ | ✓  |   |    |
| S | 5 | ✓ |    | 3 | ✓ |    |   |    |
| I | 6 | ✓ |    | 2 |   |    |   |    |
| E | 7 | ✓ | ✓  | 1 |   |    |   |    |





dbValid true ETNVSIE PHOS(1) 1. 873. -1.65556 6.05766 100. ? 2232.  
 S\_Acido\_new%gi|68567258|gb|AAY80187.1| ETNVSIE%::::PHOS:::sample\_0%compd\_822

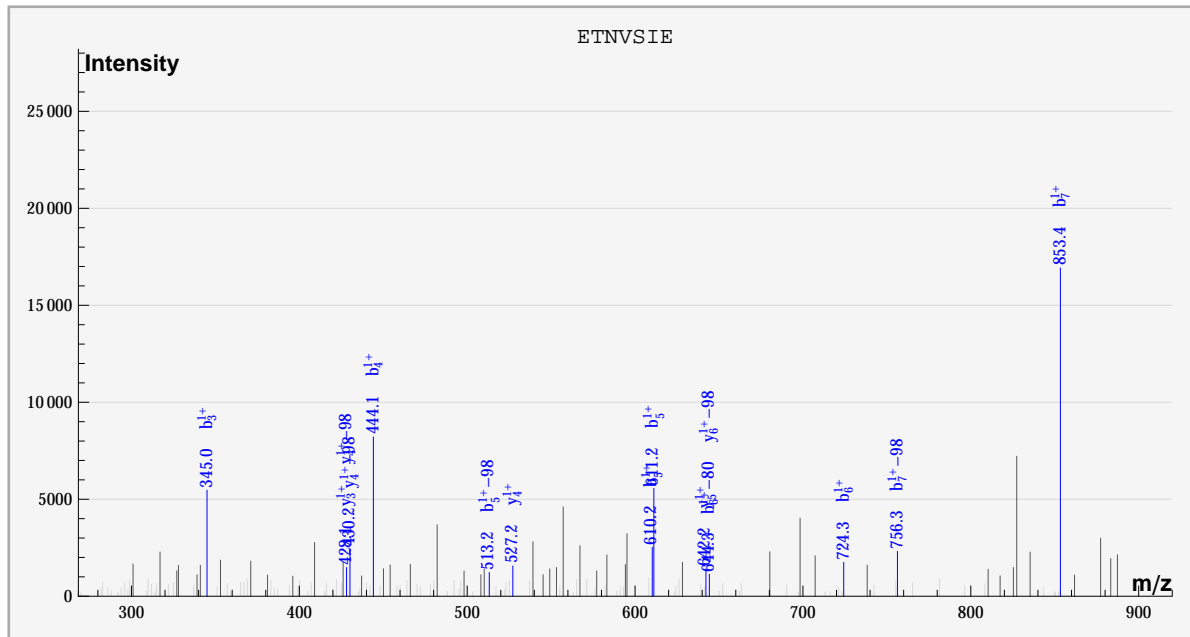

|   | # | b | b* | # | y | y* | P | P* |
|---|---|---|----|---|---|----|---|----|
| E | 1 |   |    |   |   |    |   |    |
| T | 2 |   |    | 6 |   | ✓  |   |    |
| N | 3 | ✓ |    | 5 | ✓ |    |   |    |
| V | 4 | ✓ |    | 4 | ✓ | ✓  |   |    |
| S | 5 | ✓ | ✓  | 3 | ✓ |    |   |    |
| I | 6 | ✓ | ✓  | 2 |   |    |   |    |
| E | 7 | ✓ | ✓  | 1 |   |    |   |    |

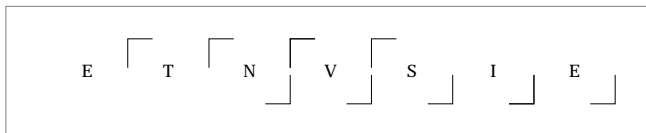

dbValid true VVGFKSR PHOS(1) 1. 873. -0.561055 5.14726 100. ? 2262.  
 S\_Acido\_new%gi|68568000|gb|AAY80929.1| VVGFKSR%:::PHOS::%sample\_2%compd\_920

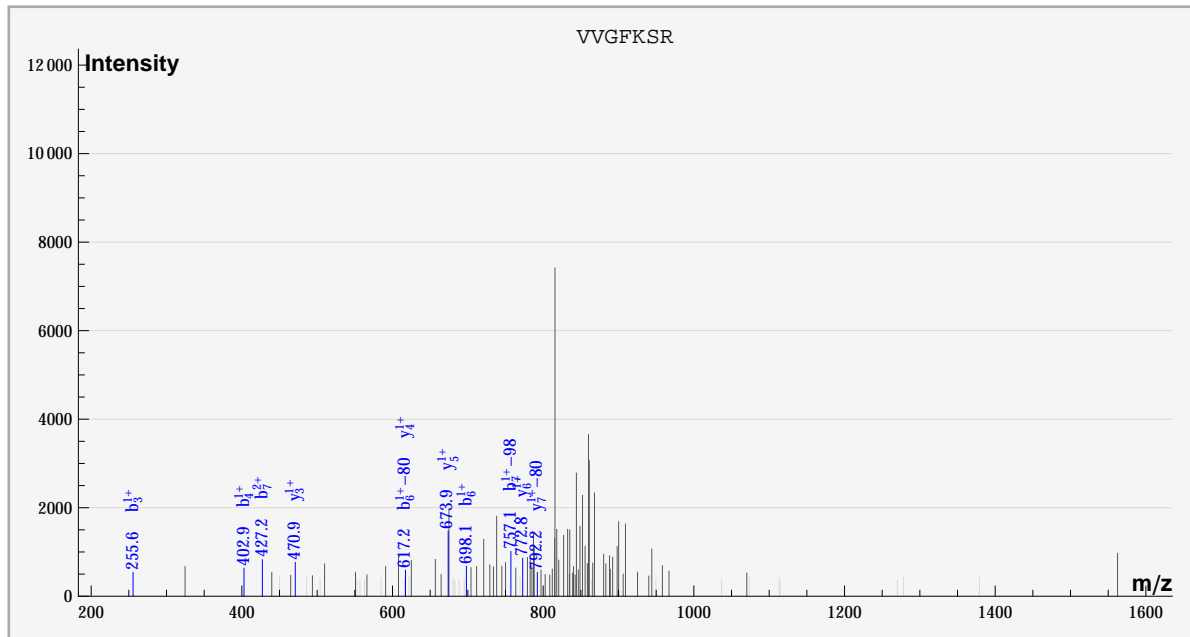

|   | # | b | b* | # | y | y* | P | P* |
|---|---|---|----|---|---|----|---|----|
| V | 1 |   |    |   |   |    |   | ✓  |
| V | 2 |   |    | 6 | ✓ |    |   |    |
| G | 3 | ✓ |    | 5 | ✓ |    |   |    |
| F | 4 | ✓ |    | 4 | ✓ |    |   |    |
| K | 5 |   |    | 3 | ✓ |    |   |    |
| S | 6 | ✓ | ✓  | 2 |   |    |   |    |
| R | 7 | ✓ | ✓  | 1 |   |    |   |    |

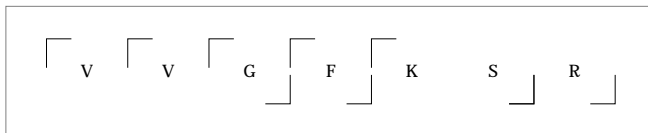

dbValid true ELDSISK PHOS(1) 1. 873. -1.61918 6.90682 100. ? 2280.  
 S\_Acido\_new%gi|68567813|gb|AAY80742.1| ELDSISK%:::PHOS::%sample\_0%compd\_862

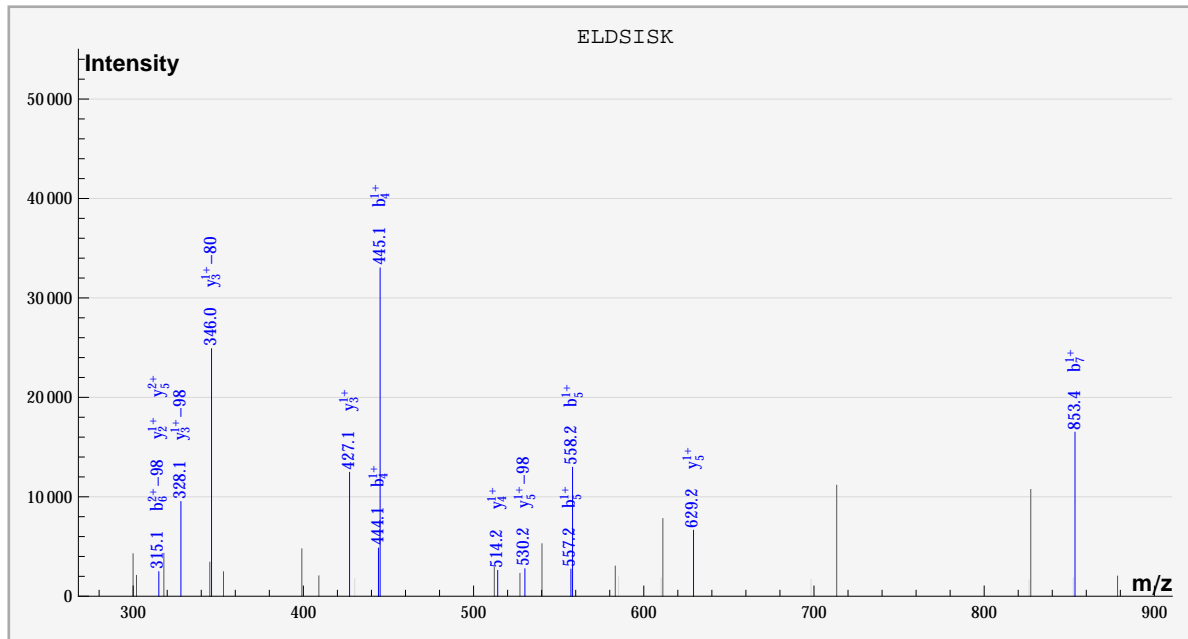

|   | # | b | b* | # | y | y* | P | P* |
|---|---|---|----|---|---|----|---|----|
| E | 1 |   |    |   |   |    |   |    |
| L | 2 |   |    | 6 |   |    |   |    |
| D | 3 |   |    | 5 | ✓ | ✓  |   |    |
| S | 4 | ✓ |    | 4 | ✓ |    |   |    |
| I | 5 | ✓ |    | 3 | ✓ | ✓  |   |    |
| S | 6 |   | ✓  | 2 | ✓ |    |   |    |
| K | 7 | ✓ |    | 1 |   |    |   |    |

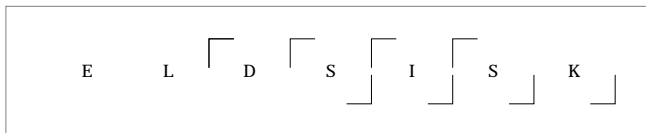

dbValid true ELD SISK PHOS(1) 1. 873. -1.61918 6.83467 100. ? 2292.  
 S\_Acido\_new%gi|68567813|gb|AAY80742.1| ELD SISK%::::::PHOS::%sample\_0%compd\_872

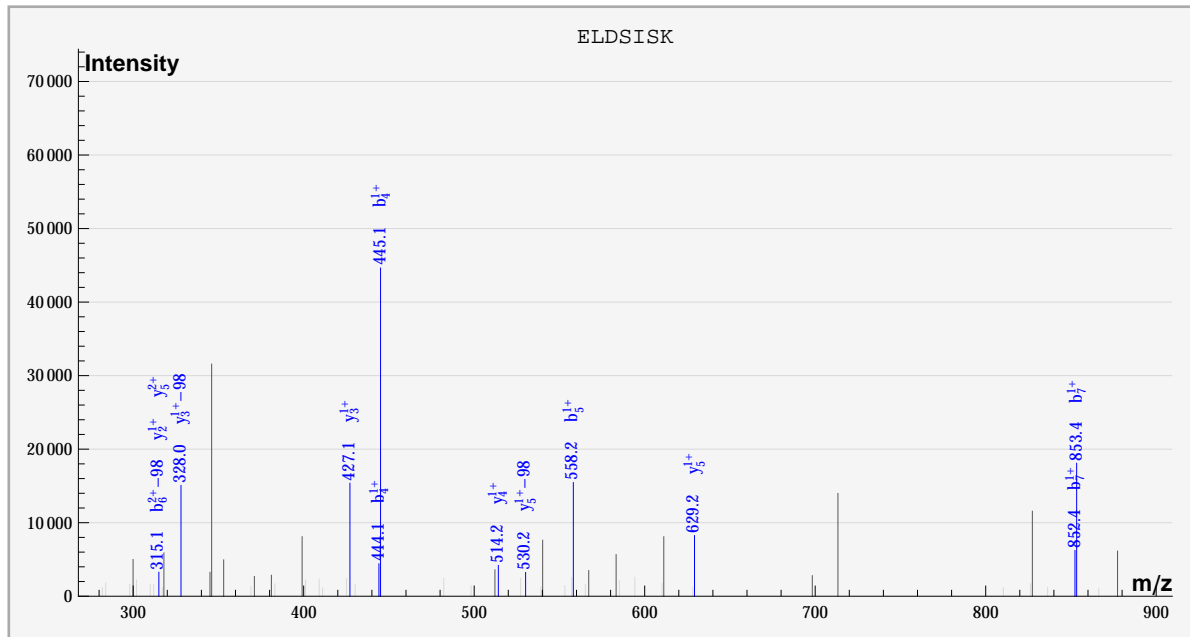

|   | # | b | b* | # | y | y* | P | P* |
|---|---|---|----|---|---|----|---|----|
| E | 1 |   |    |   |   |    |   |    |
| L | 2 |   |    | 6 |   |    |   |    |
| D | 3 |   |    | 5 | ✓ | ✓  |   |    |
| S | 4 | ✓ |    | 4 | ✓ |    |   |    |
| I | 5 | ✓ |    | 3 | ✓ | ✓  |   |    |
| S | 6 |   | ✓  | 2 | ✓ |    |   |    |
| K | 7 | ✓ |    | 1 |   |    |   |    |

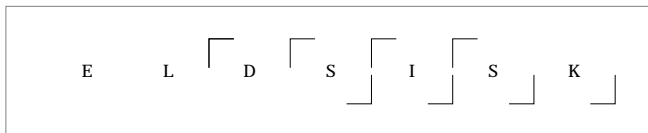

dbValid true ELD SISK PHOS(1) 1. 873. -1.61918 6.53805 100. ? 2304.  
 S\_Acido\_new%gi68567813|gb|AAY80742.1| ELD SISK%::::::PHOS::%sample\_0%compd\_883

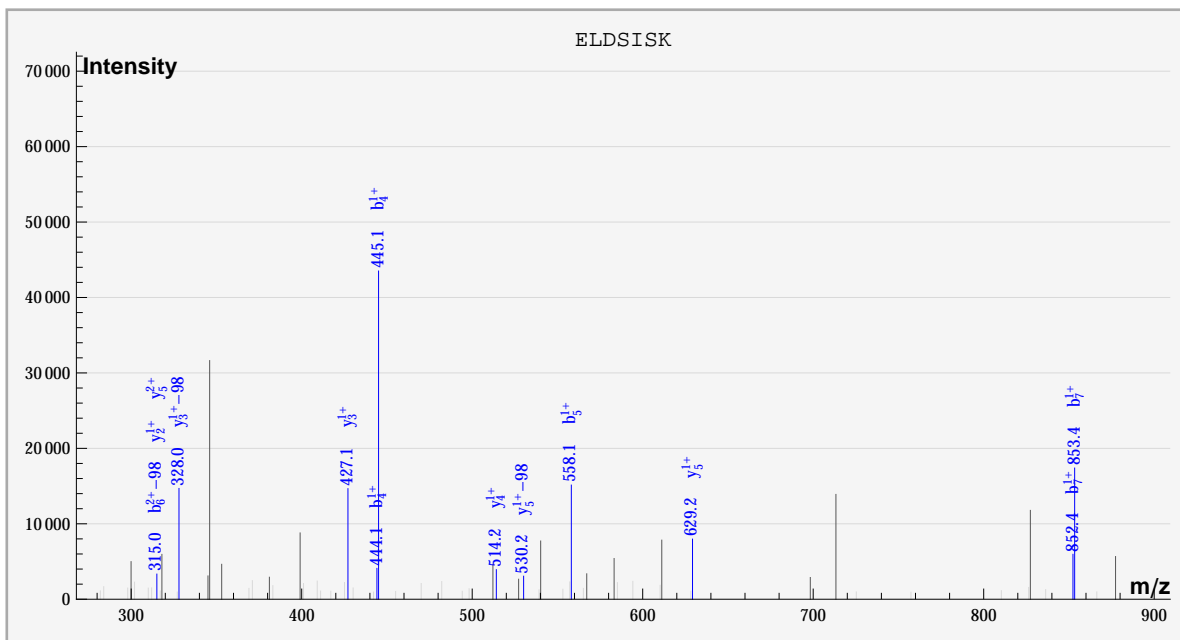

|   | # | b | b* | # | y | y* | P | P* |
|---|---|---|----|---|---|----|---|----|
| E | 1 |   |    |   |   |    |   |    |
| L | 2 |   |    | 6 |   |    |   |    |
| D | 3 |   |    | 5 | ✓ | ✓  |   |    |
| S | 4 | ✓ |    | 4 | ✓ |    |   |    |
| I | 5 | ✓ |    | 3 | ✓ | ✓  |   |    |
| S | 6 |   | ✓  | 2 | ✓ |    |   |    |
| K | 7 | ✓ |    | 1 |   |    |   |    |

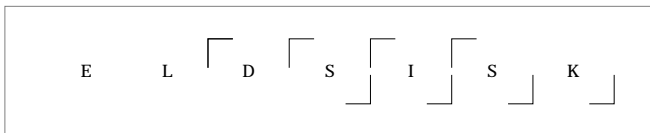

dbValid true ELD SISK PHOS(1) 1. 873. -1.61918 6.09576 100. ? 2316.  
 S\_Acido\_new%gi|68567813|gb|AAY80742.1| ELD SISK%::::::PHOS::%sample\_0%compd\_893

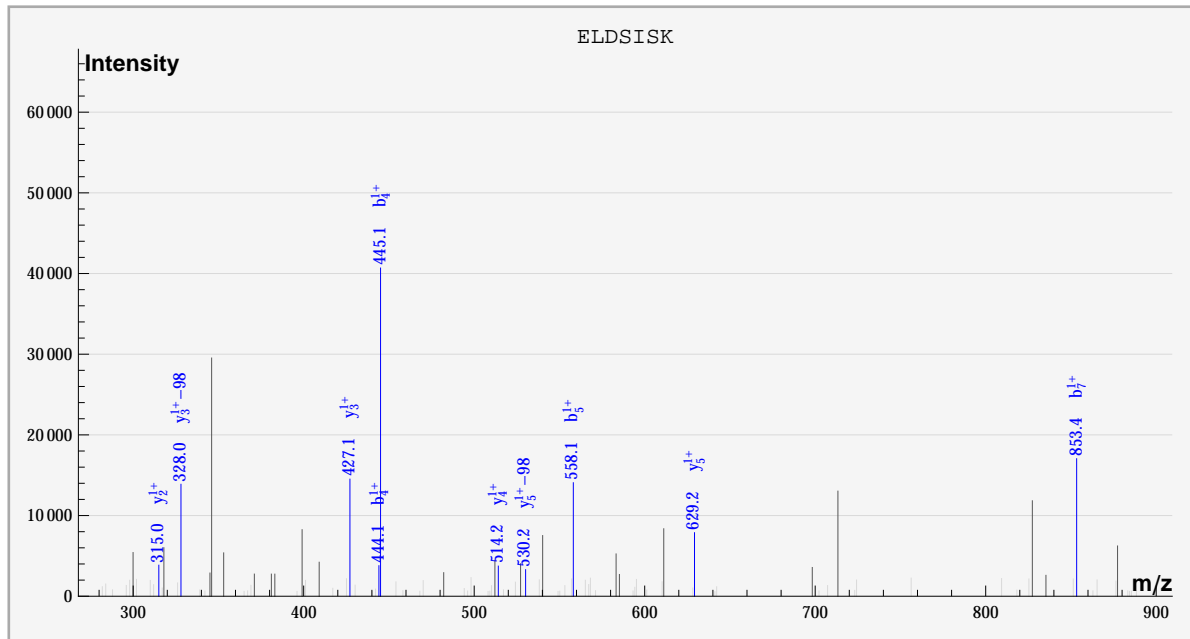

|   | # | b | b* | # | y | y* | P | P* |
|---|---|---|----|---|---|----|---|----|
| E | 1 |   |    |   |   |    |   |    |
| L | 2 |   |    | 6 |   |    |   |    |
| D | 3 |   |    | 5 | ✓ | ✓  |   |    |
| S | 4 | ✓ |    | 4 | ✓ |    |   |    |
| I | 5 | ✓ |    | 3 | ✓ | ✓  |   |    |
| S | 6 |   |    | 2 | ✓ |    |   |    |
| K | 7 | ✓ |    | 1 |   |    |   |    |

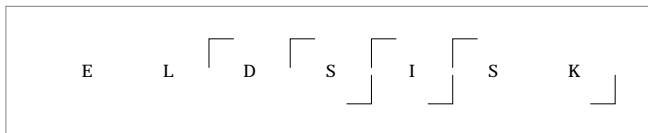

dbValid true ELD SISK PHOS(1) 1. 873. -1.61918 7.0386 100. ? 2328.  
 S\_Acido\_new%gi|68567813|gb|AAY80742.1| ELD SISK%::::::PHOS::%sample\_0%compd\_903

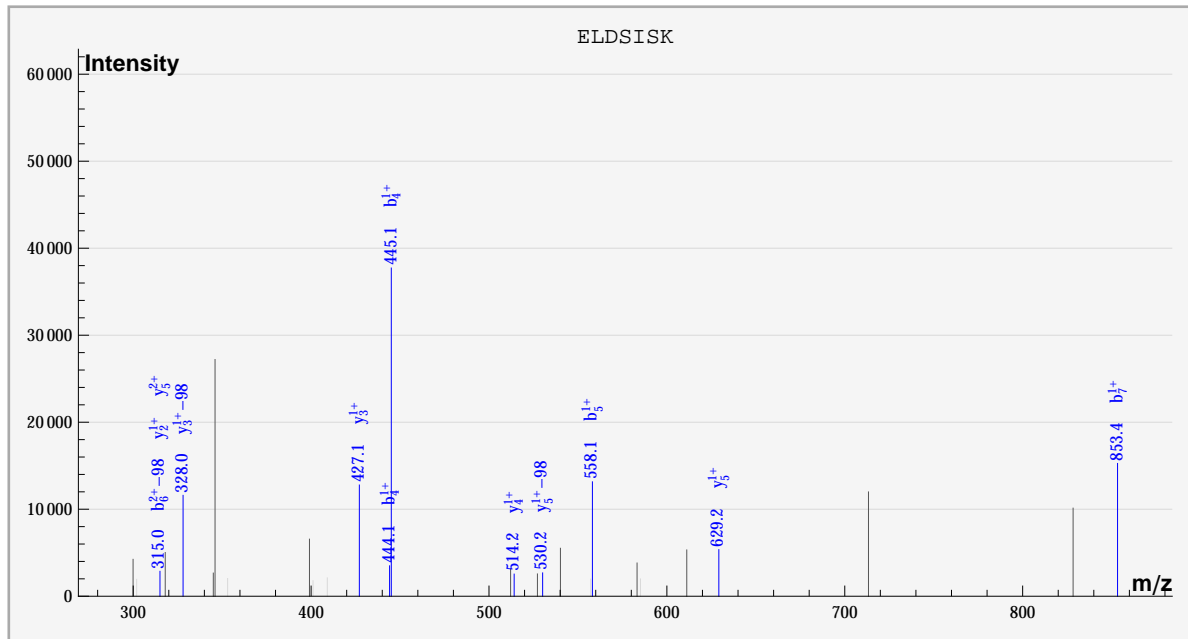

|   | # | b | b* | # | y | y* | P | P* |
|---|---|---|----|---|---|----|---|----|
| E | 1 |   |    |   |   |    |   |    |
| L | 2 |   |    | 6 |   |    |   |    |
| D | 3 |   |    | 5 | ✓ | ✓  |   |    |
| S | 4 | ✓ |    | 4 | ✓ |    |   |    |
| I | 5 | ✓ |    | 3 | ✓ | ✓  |   |    |
| S | 6 |   | ✓  | 2 | ✓ |    |   |    |
| K | 7 | ✓ |    | 1 |   |    |   |    |



dbValid true ELDSISK PHOS(1) 1. 873. -1.61918 5.45617 100. ? 2340.  
 S\_Acido\_new%gi|68567813|gb|AAY80742.1| ELDSISK%:::::PHOS::%sample\_0%compd\_914

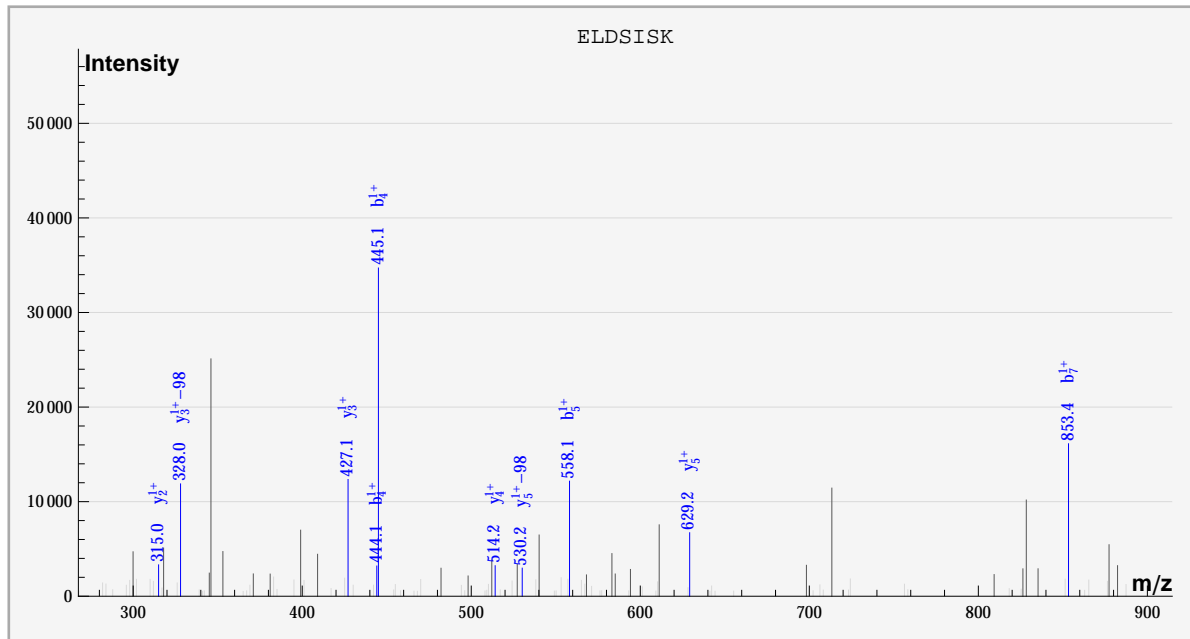

|   | # | b | b* | # | y | y* | P | P* |
|---|---|---|----|---|---|----|---|----|
| E | 1 |   |    |   |   |    |   |    |
| L | 2 |   |    | 6 |   |    |   |    |
| D | 3 |   |    | 5 | ✓ | ✓  |   |    |
| S | 4 | ✓ |    | 4 | ✓ |    |   |    |
| I | 5 | ✓ |    | 3 | ✓ | ✓  |   |    |
| S | 6 |   |    | 2 | ✓ |    |   |    |
| K | 7 | ✓ |    | 1 |   |    |   |    |





dbValid true ELD SISK PHOS(1) 1. 873. -1.61918 6.96695 100. ? 2352.  
 S\_Acido\_new%gi|68567813|gb|AAY80742.1| ELD SISK%::::::PHOS::%sample\_0%compd\_924

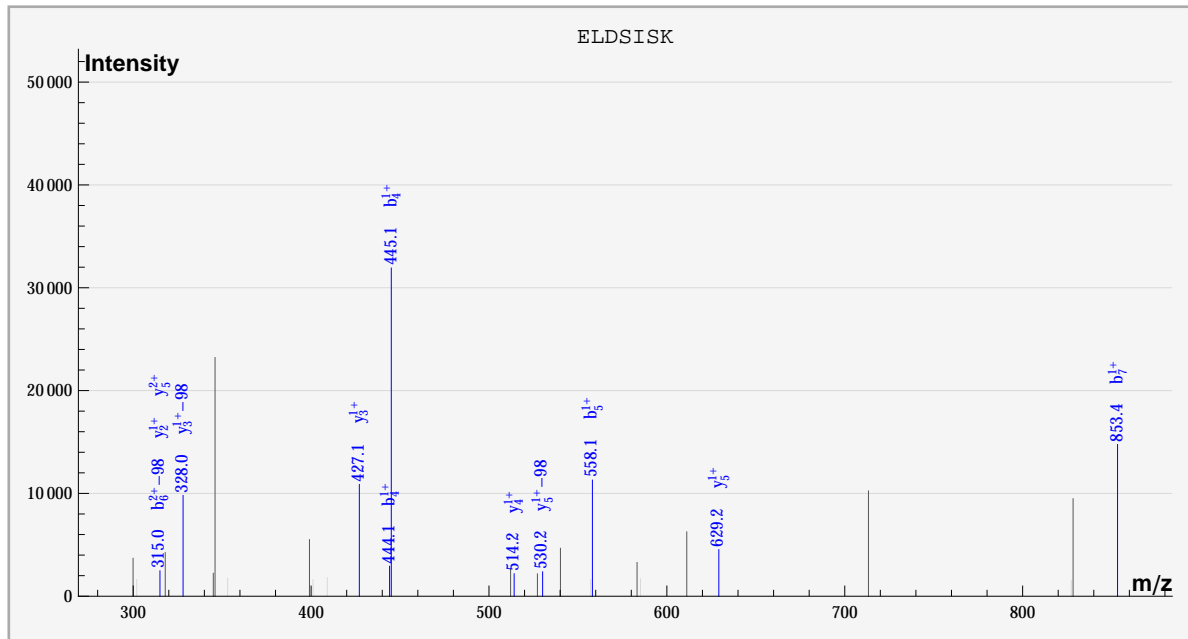

|   | # | b | b* | # | y | y* | P | P* |
|---|---|---|----|---|---|----|---|----|
| E | 1 |   |    |   |   |    |   |    |
| L | 2 |   |    | 6 |   |    |   |    |
| D | 3 |   |    | 5 | ✓ | ✓  |   |    |
| S | 4 | ✓ |    | 4 | ✓ |    |   |    |
| I | 5 | ✓ |    | 3 | ✓ | ✓  |   |    |
| S | 6 |   | ✓  | 2 | ✓ |    |   |    |
| K | 7 | ✓ |    | 1 |   |    |   |    |



dbValid true ELD SISK PHOS(1) 1. 873. -1.61918 6.96695 100. ? 2364.  
 S\_Acido\_new%gi|68567813|gb|AAY80742.1| ELD SISK%::::::PHOS::%sample\_0%compd\_934

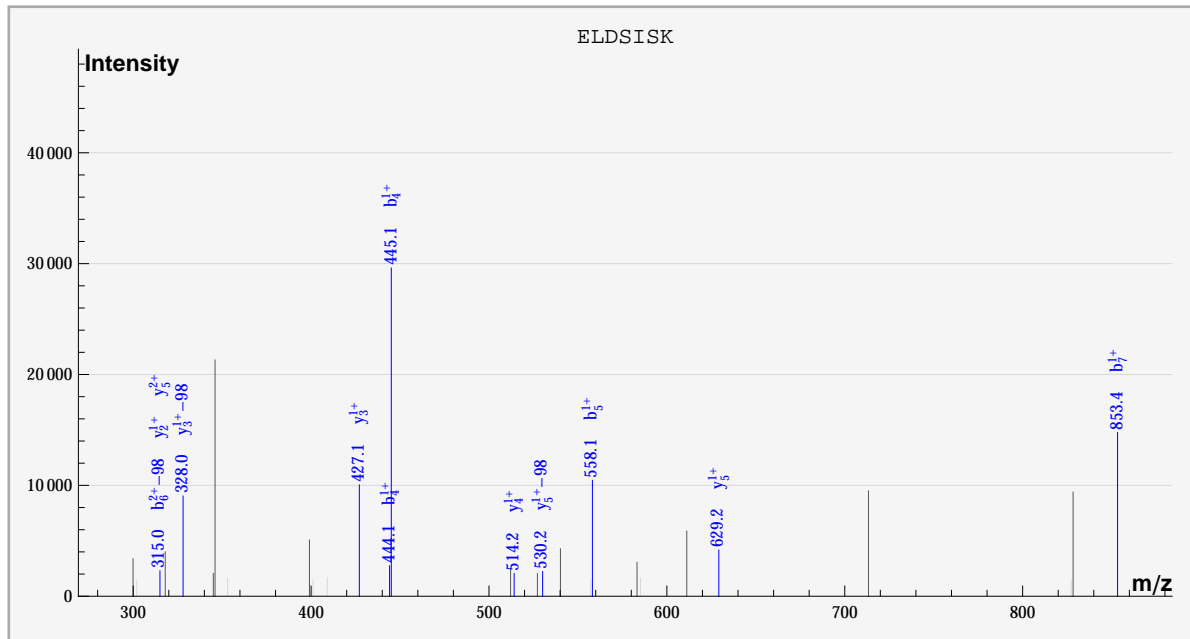

|   | # | b | b* | # | y | y* | P | P* |
|---|---|---|----|---|---|----|---|----|
| E | 1 |   |    |   |   |    |   |    |
| L | 2 |   |    | 6 |   |    |   |    |
| D | 3 |   |    | 5 | ✓ | ✓  |   |    |
| S | 4 | ✓ |    | 4 | ✓ |    |   |    |
| I | 5 | ✓ |    | 3 | ✓ | ✓  |   |    |
| S | 6 |   | ✓  | 2 | ✓ |    |   |    |
| K | 7 | ✓ |    | 1 |   |    |   |    |



dbValid true ELDSISK PHOS(1) 1. 873. -1.61918 6.72939 100. ? 2376.  
 S\_Acido\_new%gi|68567813|gb|AAY80742.1| ELDSISK%::::::PHOS::%sample\_0%compd\_944

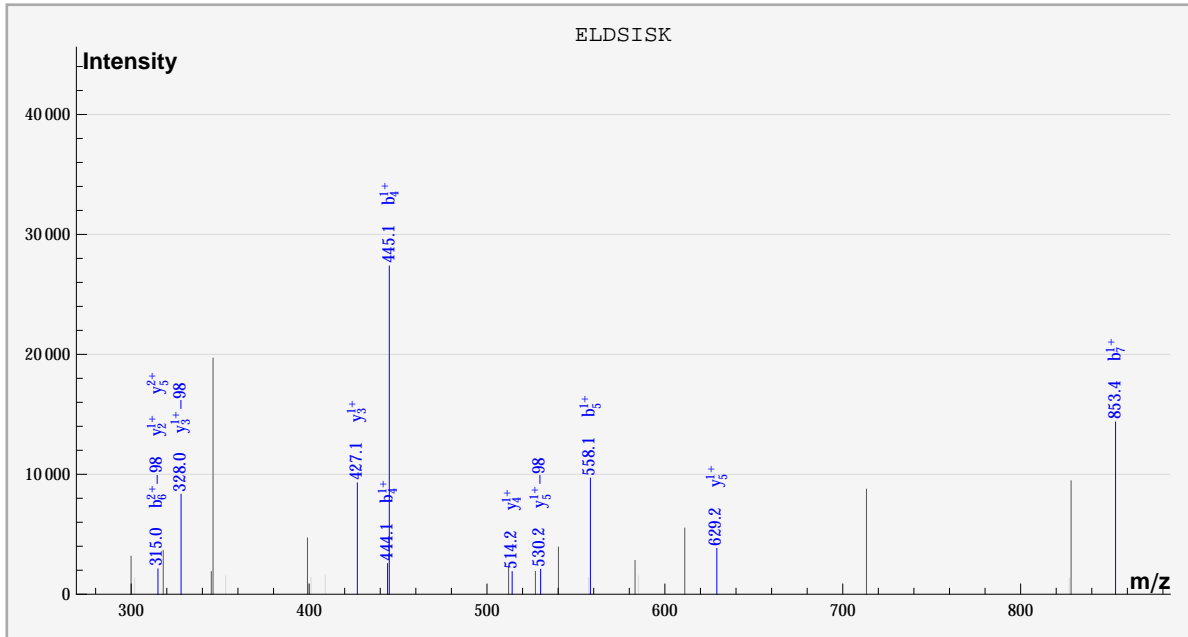

|   | # | b | b* | # | y | y* | P | P* |
|---|---|---|----|---|---|----|---|----|
| E | 1 |   |    |   |   |    |   |    |
| L | 2 |   |    | 6 |   |    |   |    |
| D | 3 |   |    | 5 | ✓ | ✓  |   |    |
| S | 4 | ✓ |    | 4 | ✓ |    |   |    |
| I | 5 | ✓ |    | 3 | ✓ | ✓  |   |    |
| S | 6 |   | ✓  | 2 | ✓ |    |   |    |
| K | 7 | ✓ |    | 1 |   |    |   |    |

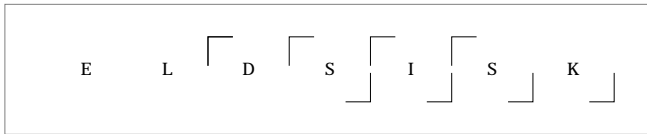

dbValid true ELDSISK PHOS(1) 1. 873. -1.61918 6.66489 100. ? 2388.  
 S\_Acido\_new%gi|68567813|gb|AAY80742.1| ELDSISK%::::::PHOS::%sample\_0%compd\_954

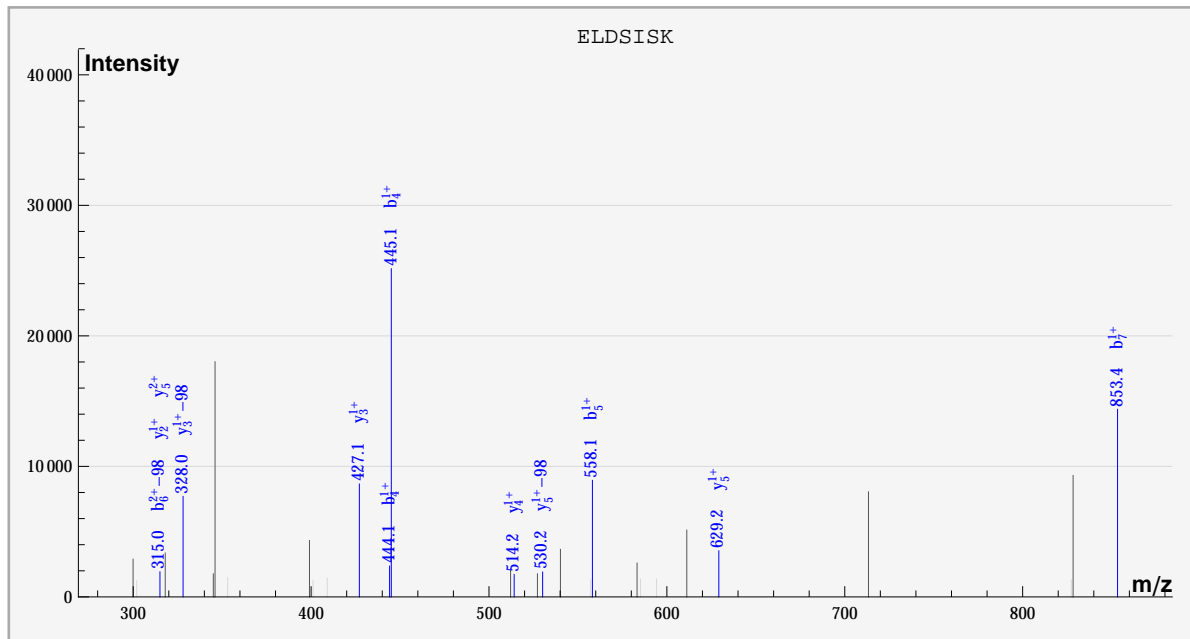

|   | # | b | b* | # | y | y* | P | P* |
|---|---|---|----|---|---|----|---|----|
| E | 1 |   |    |   |   |    |   |    |
| L | 2 |   |    | 6 |   |    |   |    |
| D | 3 |   |    | 5 | ✓ | ✓  |   |    |
| S | 4 | ✓ |    | 4 | ✓ |    |   |    |
| I | 5 | ✓ |    | 3 | ✓ | ✓  |   |    |
| S | 6 |   | ✓  | 2 | ✓ |    |   |    |
| K | 7 | ✓ |    | 1 |   |    |   |    |

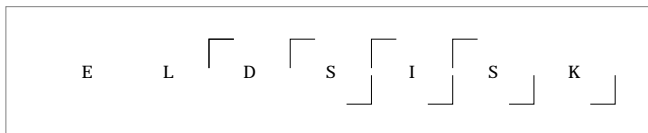

dbValid true ELDSISK PHOS(1) 1. 873. -1.61918 6.68177 100. ? 2400.  
 S\_Acido\_new%gi|68567813|gb|AAY80742.1| ELDSISK%::::::PHOS::%sample\_0%compd\_964

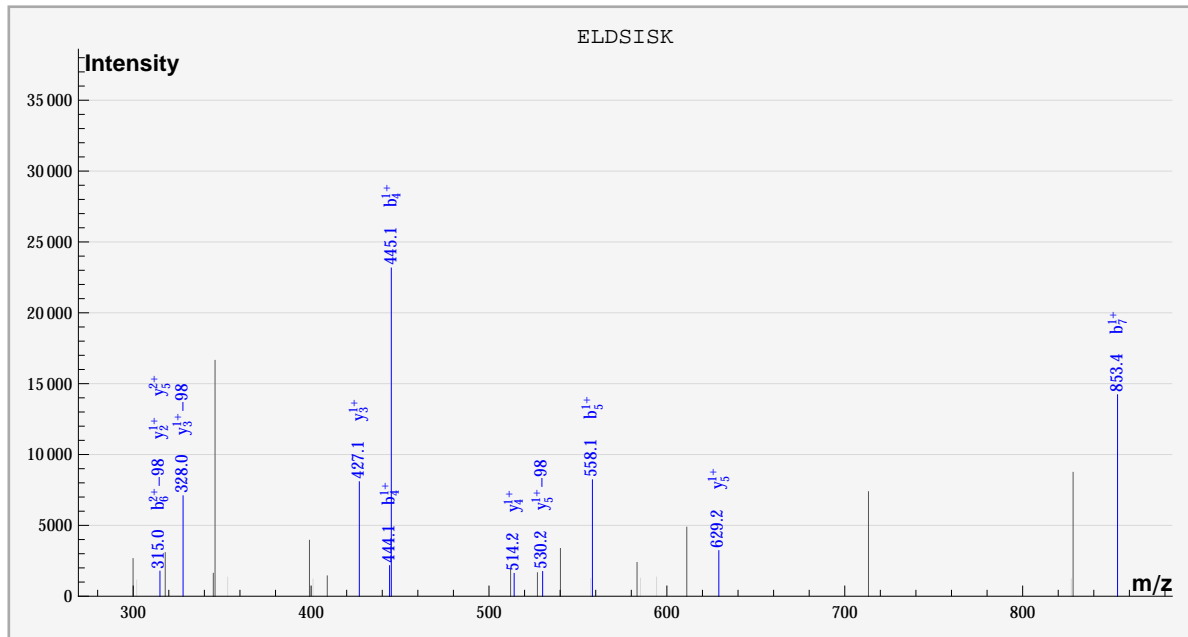

|   | # | b | b* | # | y | y* | P | P* |
|---|---|---|----|---|---|----|---|----|
| E | 1 |   |    |   |   |    |   |    |
| L | 2 |   |    | 6 |   |    |   |    |
| D | 3 |   |    | 5 | ✓ | ✓  |   |    |
| S | 4 | ✓ |    | 4 | ✓ |    |   |    |
| I | 5 | ✓ |    | 3 | ✓ | ✓  |   |    |
| S | 6 |   | ✓  | 2 | ✓ |    |   |    |
| K | 7 | ✓ |    | 1 |   |    |   |    |



dbValid true ELSISIK PHOS(1) 1. 873. -1.61918 6.99413 100. ? 2412.  
 S\_Acido\_new%gi|68567813|gb|AAY80742.1| ELSISIK%::::::PHOS::%sample\_0%compd\_974

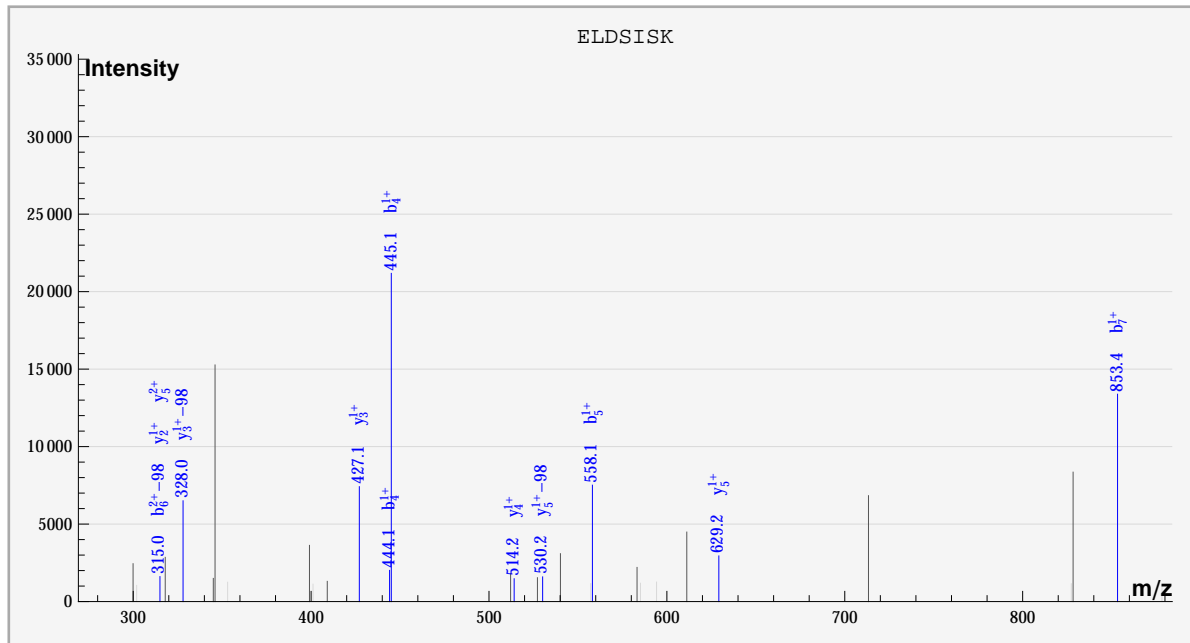

|   | # | b | b* | # | y | y* | P | P* |
|---|---|---|----|---|---|----|---|----|
| E | 1 |   |    |   |   |    |   |    |
| L | 2 |   |    | 6 |   |    |   |    |
| D | 3 |   |    | 5 | ✓ | ✓  |   |    |
| S | 4 | ✓ |    | 4 | ✓ |    |   |    |
| I | 5 | ✓ |    | 3 | ✓ | ✓  |   |    |
| S | 6 |   | ✓  | 2 | ✓ |    |   |    |
| K | 7 | ✓ |    | 1 |   |    |   |    |



dbValid true ELDSISK PHOS(1) 1. 873. -1.61918 6.91637 100. ? 2424.  
 S\_Acido\_new%gi|68567813|gb|AAY80742.1| ELDSISK%:::PHOS::%sample\_0%compd\_985

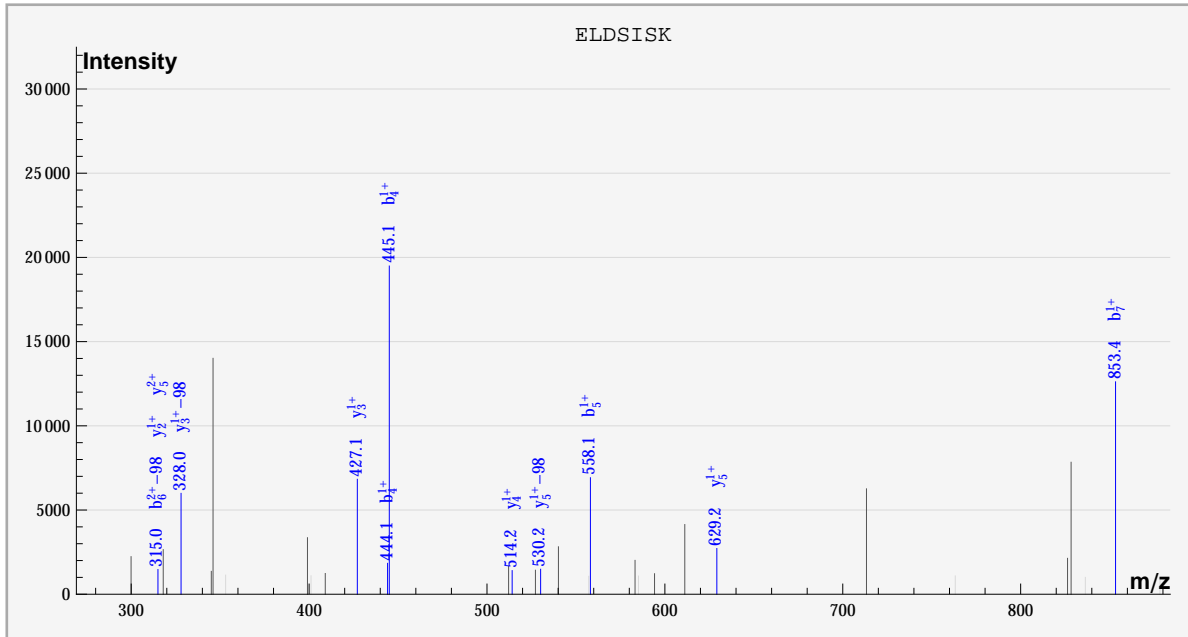

|   | # | b | b* | # | y | y* | P | P* |
|---|---|---|----|---|---|----|---|----|
| E | 1 |   |    |   |   |    |   |    |
| L | 2 |   |    | 6 |   |    |   |    |
| D | 3 |   |    | 5 | ✓ | ✓  |   |    |
| S | 4 | ✓ |    | 4 | ✓ |    |   |    |
| I | 5 | ✓ |    | 3 | ✓ | ✓  |   |    |
| S | 6 |   | ✓  | 2 | ✓ |    |   |    |
| K | 7 | ✓ |    | 1 |   |    |   |    |



dbValid true ELD SISK PHOS(1) 1. 873. -1.61918 6.81102 100. ? 2436.  
 S\_Acido\_new%gi68567813|gb|AAY80742.1| ELD SISK%::::::PHOS::%sample\_0%compd\_996

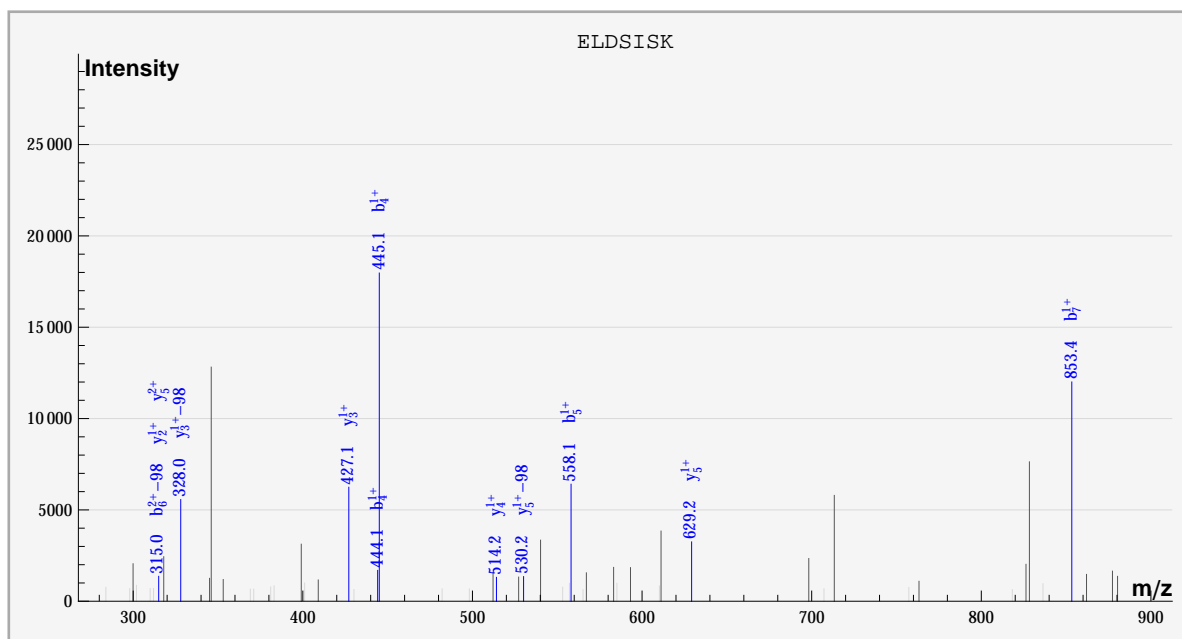

|   | # | b | b* | # | y | y* | P | P* |
|---|---|---|----|---|---|----|---|----|
| E | 1 |   |    |   |   |    |   |    |
| L | 2 |   |    | 6 |   |    |   |    |
| D | 3 |   |    | 5 | ✓ | ✓  |   |    |
| S | 4 | ✓ |    | 4 | ✓ |    |   |    |
| I | 5 | ✓ |    | 3 | ✓ | ✓  |   |    |
| S | 6 |   | ✓  | 2 | ✓ |    |   |    |
| K | 7 | ✓ |    | 1 |   |    |   |    |

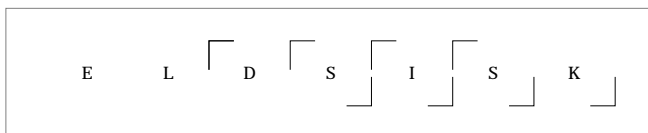



dbValid true ELDSISK PHOS(1) 1. 873. -1.61918 6.08772 100. ? 2448.

S\_Acido\_new%gi|68567813|gb|AAY80742.1| ELDSISK%::::::PHOS::%sample\_0%compd\_1006

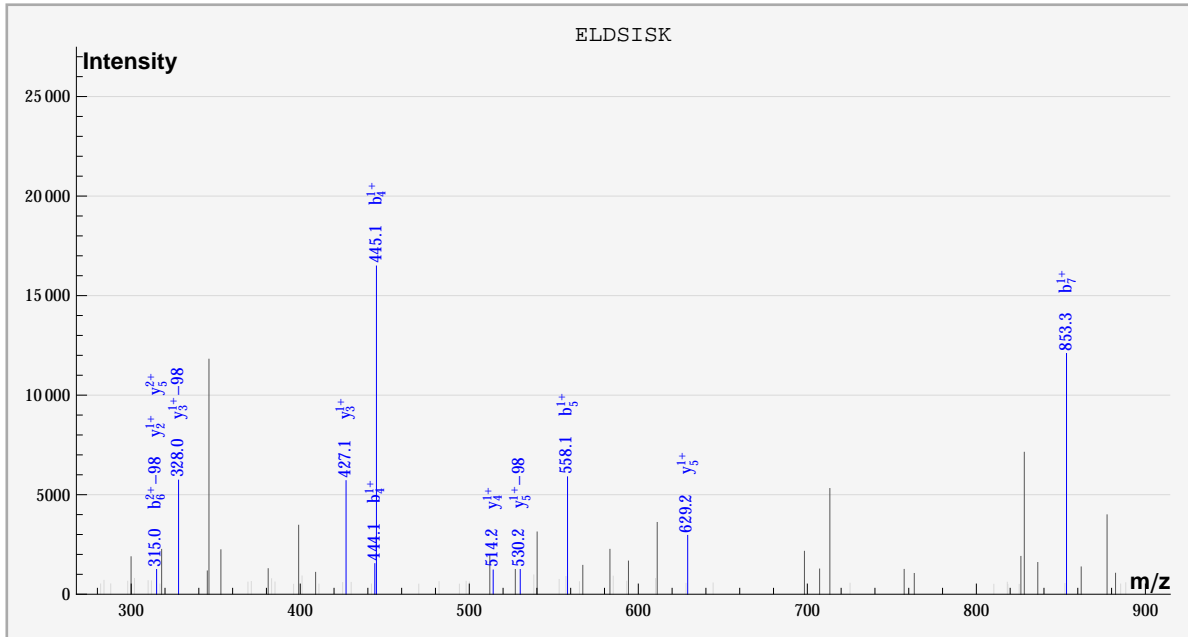

|   | # | b | b* | # | y | y* | P | P* |
|---|---|---|----|---|---|----|---|----|
| E | 1 |   |    |   |   |    |   |    |
| L | 2 |   |    | 6 |   |    |   |    |
| D | 3 |   |    | 5 | ✓ | ✓  |   |    |
| S | 4 | ✓ |    | 4 | ✓ |    |   |    |
| I | 5 | ✓ |    | 3 | ✓ | ✓  |   |    |
| S | 6 |   | ✓  | 2 | ✓ |    |   |    |
| K | 7 | ✓ |    | 1 |   |    |   |    |



dbValid true ELDSISK PHOS(1) 1. 873. -1.61918 5.91302 100. ? 2460.  
 S\_Acido\_new%gi|68567813|gb|AAY80742.1| ELDSISK%::::::PHOS::%sample\_0%compd\_1017

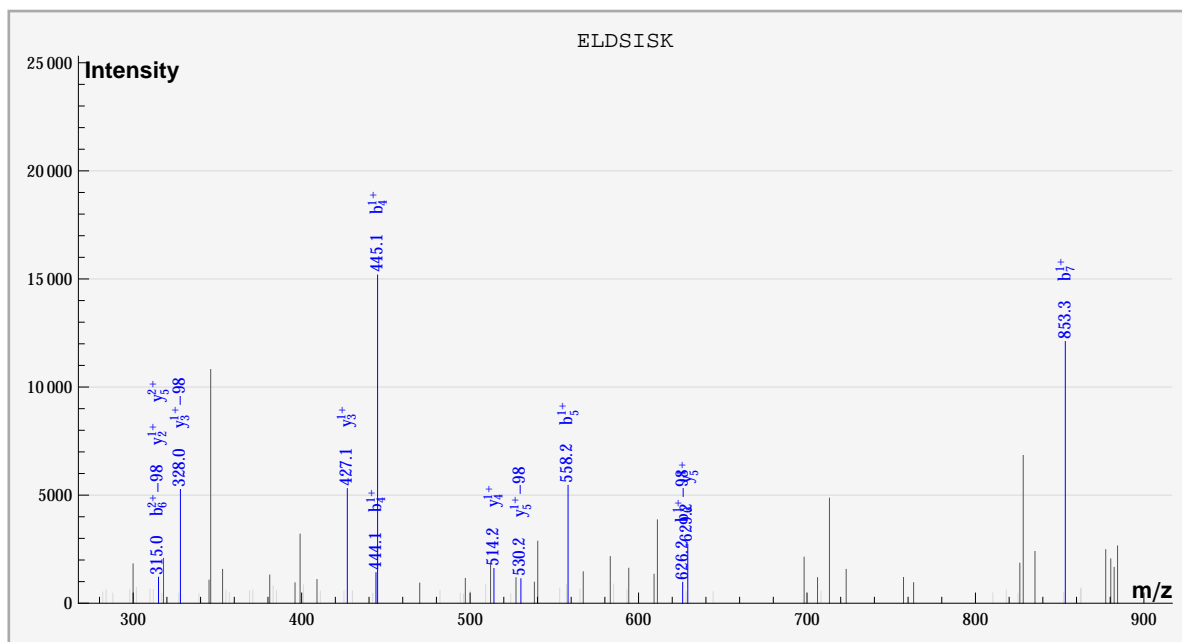

|   | # | b | b* | # | y | y* | P | P* |
|---|---|---|----|---|---|----|---|----|
| E | 1 |   |    |   |   |    |   |    |
| L | 2 |   |    | 6 |   |    |   |    |
| D | 3 |   |    | 5 | ✓ | ✓  |   |    |
| S | 4 | ✓ |    | 4 | ✓ |    |   |    |
| I | 5 | ✓ |    | 3 | ✓ | ✓  |   |    |
| S | 6 |   | ✓  | 2 | ✓ |    |   |    |
| K | 7 | ✓ |    | 1 |   |    |   |    |

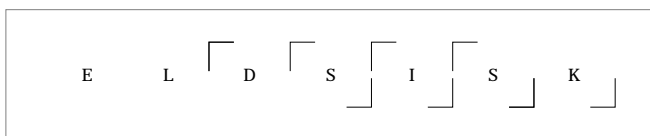

dbValid true ELD SISK PHOS(1) 1. 873. -1.61918 5.97066 100. ? 2472.

S\_Acido\_new%gi|68567813|gb|AAY80742.1| ELD SISK%::::::PHOS::%sample\_0%compd\_1027

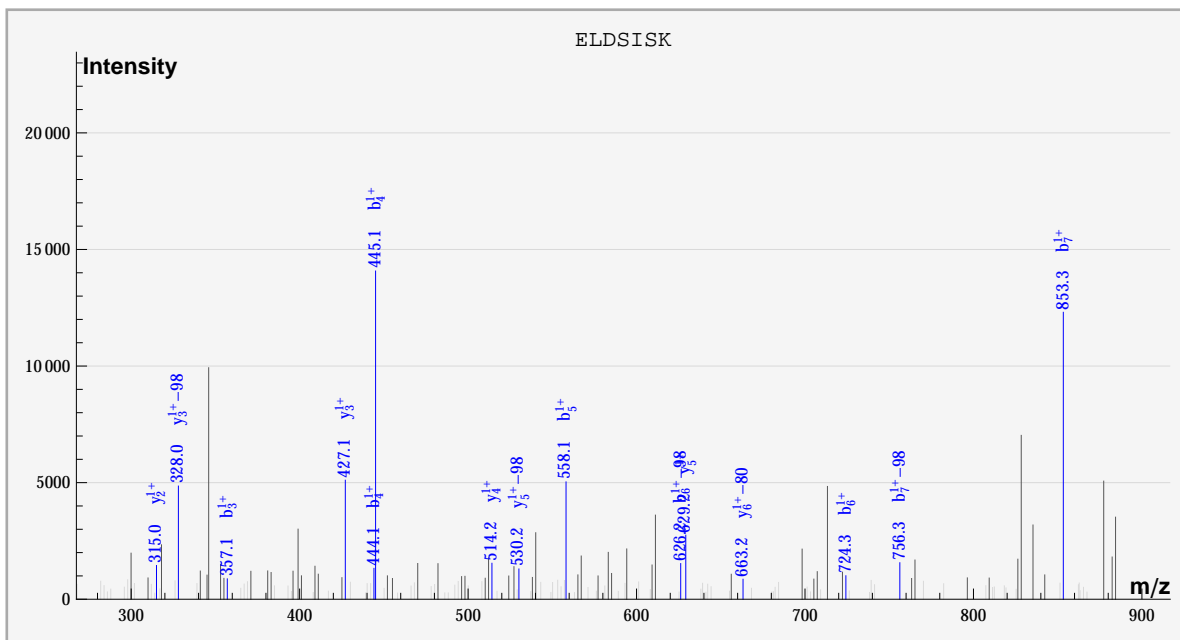

|   | # | b | b* | # | y | y* | P | P* |
|---|---|---|----|---|---|----|---|----|
| E | 1 |   |    |   |   |    |   |    |
| L | 2 |   |    | 6 |   | ✓  |   |    |
| D | 3 | ✓ |    | 5 | ✓ | ✓  |   |    |
| S | 4 | ✓ |    | 4 | ✓ |    |   |    |
| I | 5 | ✓ |    | 3 | ✓ | ✓  |   |    |
| S | 6 | ✓ | ✓  | 2 | ✓ |    |   |    |
| K | 7 | ✓ | ✓  | 1 |   |    |   |    |

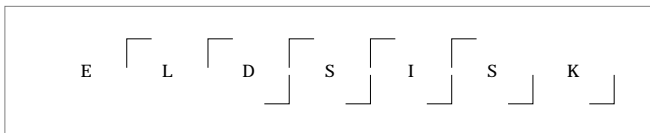

dbValid true ELD SISK PHOS(1) 1. 873. -1.61918 5.65881 100. ? 2484.  
 S\_Acido\_new%gi|68567813|gb|AAY80742.1| ELD SISK%::::::PHOS::%sample\_0%compd\_1037

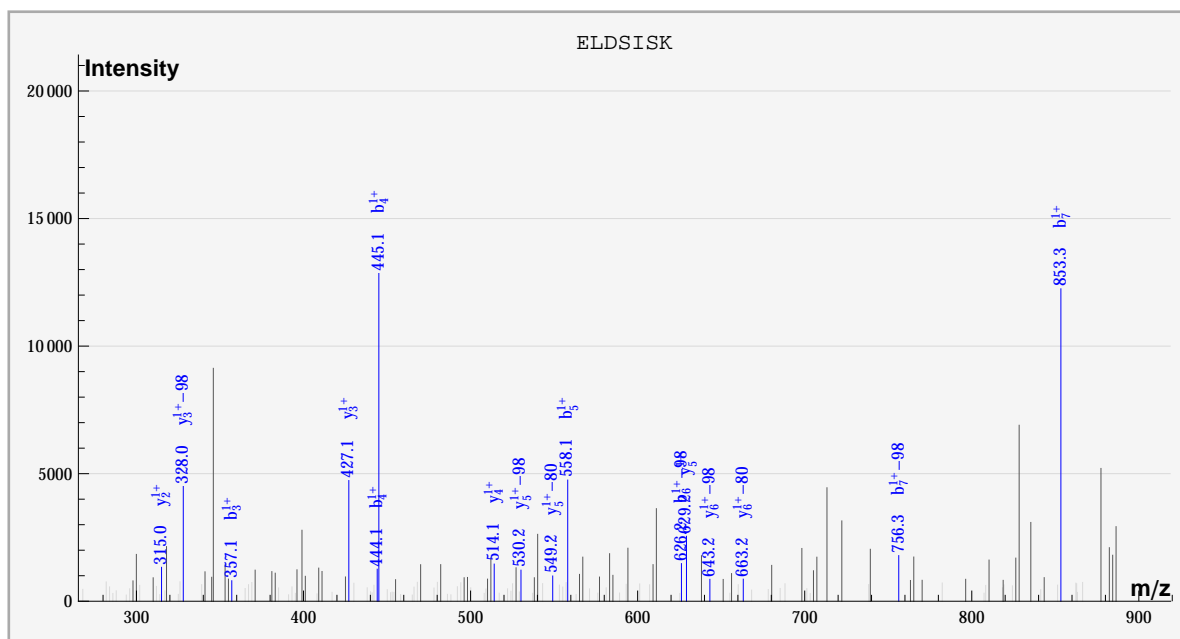

|   | # | b | b* | # | y | y* | P | P* |
|---|---|---|----|---|---|----|---|----|
| E | 1 |   |    |   |   |    |   |    |
| L | 2 |   |    | 6 |   | ✓  |   |    |
| D | 3 | ✓ |    | 5 | ✓ | ✓  |   |    |
| S | 4 | ✓ |    | 4 | ✓ |    |   |    |
| I | 5 | ✓ |    | 3 | ✓ | ✓  |   |    |
| S | 6 |   | ✓  | 2 | ✓ |    |   |    |
| K | 7 | ✓ | ✓  | 1 |   |    |   |    |

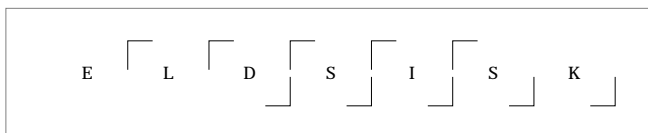

dbValid true ELD SISK PHOS(1) 1. 873. -1.61918 5.45749 100. ? 2496.

S\_Acido\_new%gi|68567813|gb|AAY80742.1| ELD SISK%:::PHOS::%sample\_0%compd\_1047

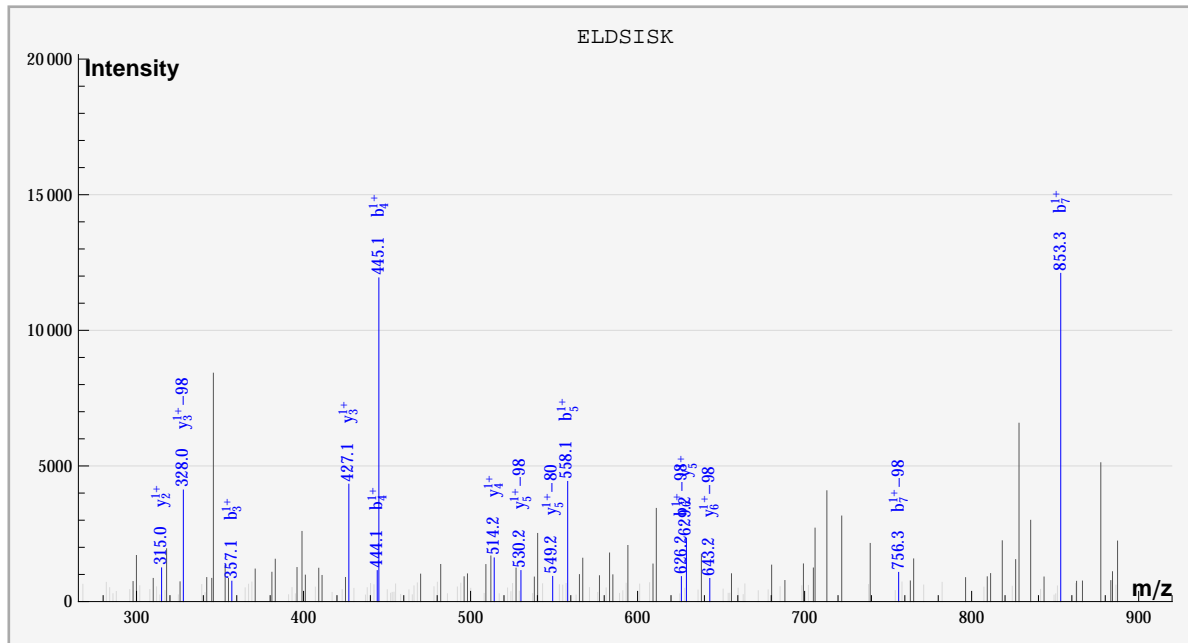

|   | # | b | b* | # | y | y* | P | P* |
|---|---|---|----|---|---|----|---|----|
| E | 1 |   |    |   |   |    |   |    |
| L | 2 |   |    | 6 |   | ✓  |   |    |
| D | 3 | ✓ |    | 5 | ✓ | ✓  |   |    |
| S | 4 | ✓ |    | 4 | ✓ |    |   |    |
| I | 5 | ✓ |    | 3 | ✓ | ✓  |   |    |
| S | 6 |   | ✓  | 2 | ✓ |    |   |    |
| K | 7 | ✓ | ✓  | 1 |   |    |   |    |

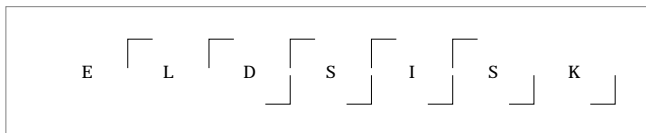

dbValid true ELSISK PHOS(1) 1. 873. -1.61918 5.66448 100. ? 2508.  
 S\_Acido\_new%gi|68567813|gb|AAY80742.1| ELSISK%:::PHOS::%sample\_0%compd\_1057

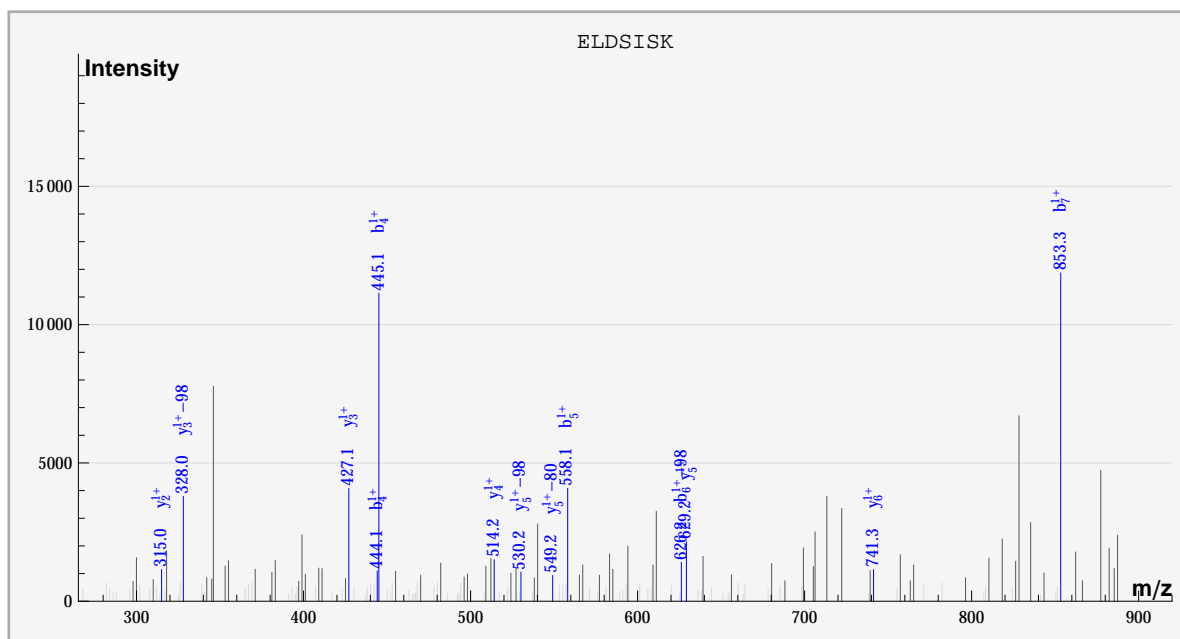

|   | # | b | b* | # | y | y* | P | P* |
|---|---|---|----|---|---|----|---|----|
| E | 1 |   |    |   |   |    |   |    |
| L | 2 |   |    | 6 | ✓ |    |   |    |
| D | 3 |   |    | 5 | ✓ | ✓  |   |    |
| S | 4 | ✓ |    | 4 | ✓ |    |   |    |
| I | 5 | ✓ |    | 3 | ✓ | ✓  |   |    |
| S | 6 |   | ✓  | 2 | ✓ |    |   |    |
| K | 7 | ✓ |    | 1 |   |    |   |    |

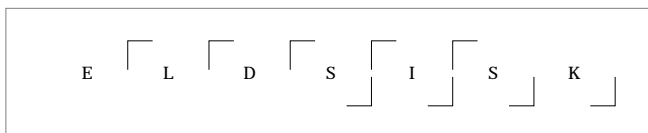

dbValid true ELD SISK PHOS(1) 1. 873. -1.61918 5.20321 100. ? 2580.  
 S\_Acido\_new%gi|68567813|gb|AAY80742.1| ELD SISK%:::PHOS::%sample\_0%compd\_1117

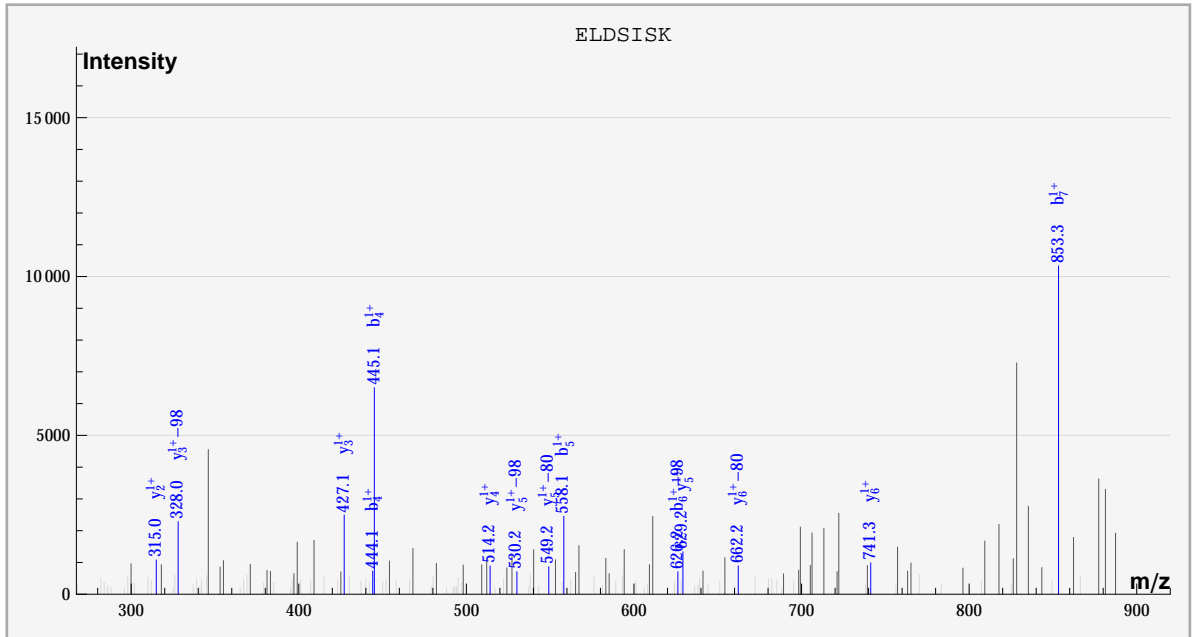

|   | # | b | b* | # | y | y* | P | P* |
|---|---|---|----|---|---|----|---|----|
| E | 1 |   |    |   |   |    |   |    |
| L | 2 |   |    | 6 | ✓ | ✓  |   |    |
| D | 3 |   |    | 5 | ✓ | ✓  |   |    |
| S | 4 | ✓ |    | 4 | ✓ |    |   |    |
| I | 5 | ✓ |    | 3 | ✓ | ✓  |   |    |
| S | 6 |   | ✓  | 2 | ✓ |    |   |    |
| K | 7 | ✓ |    | 1 |   |    |   |    |

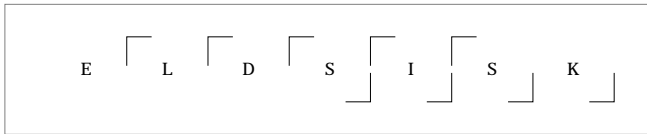

dbValid true ELDSISK PHOS(1) 1. 873. -1.61918 5.38605 100. ? 2592.  
 S\_Acido\_new%gi|68567813|gb|AAY80742.1| ELDSISK%::::::PHOS::%sample\_0%compd\_1127

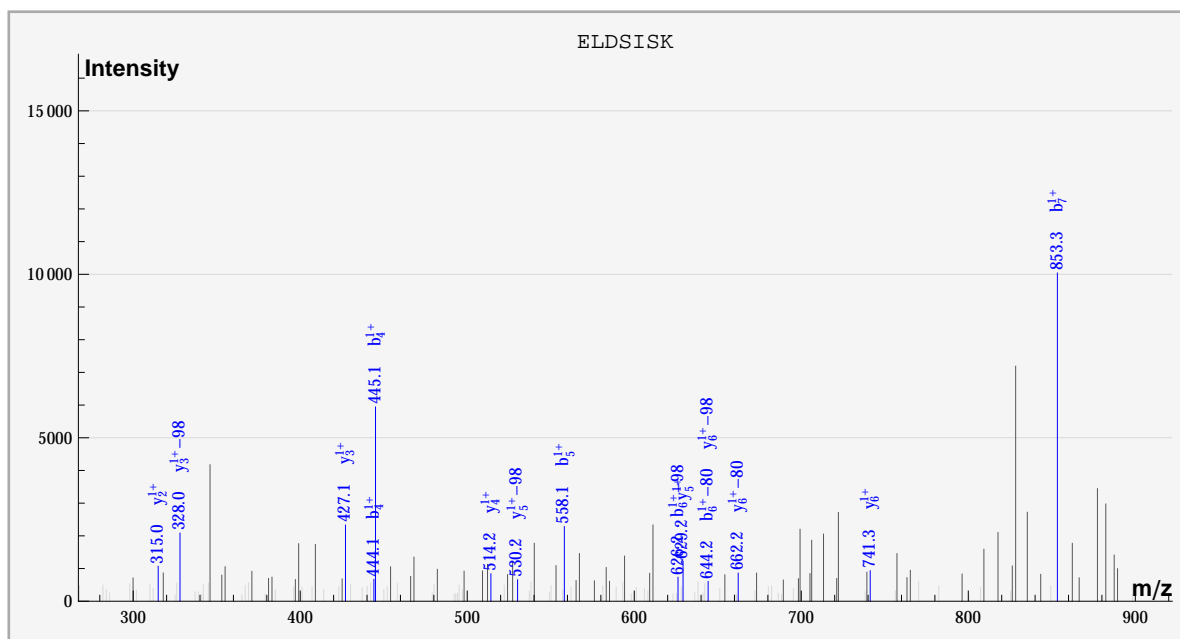

|   | # | b | b* | # | y | y* | P | P* |
|---|---|---|----|---|---|----|---|----|
| E | 1 |   |    |   |   |    |   |    |
| L | 2 |   |    | 6 | ✓ | ✓  |   |    |
| D | 3 |   |    | 5 | ✓ | ✓  |   |    |
| S | 4 | ✓ |    | 4 | ✓ |    |   |    |
| I | 5 | ✓ |    | 3 | ✓ | ✓  |   |    |
| S | 6 |   | ✓  | 2 | ✓ |    |   |    |
| K | 7 | ✓ |    | 1 |   |    |   |    |

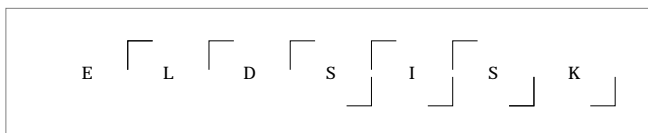



dbValid true ELD SISK PHOS(1) 1. 873. -1.61918 5.48855 100. ? 2604.

S\_Acido\_new%gi|68567813|gb|AAY80742.1| ELD SISK%::::::PHOS::%sample\_0%compd\_1137

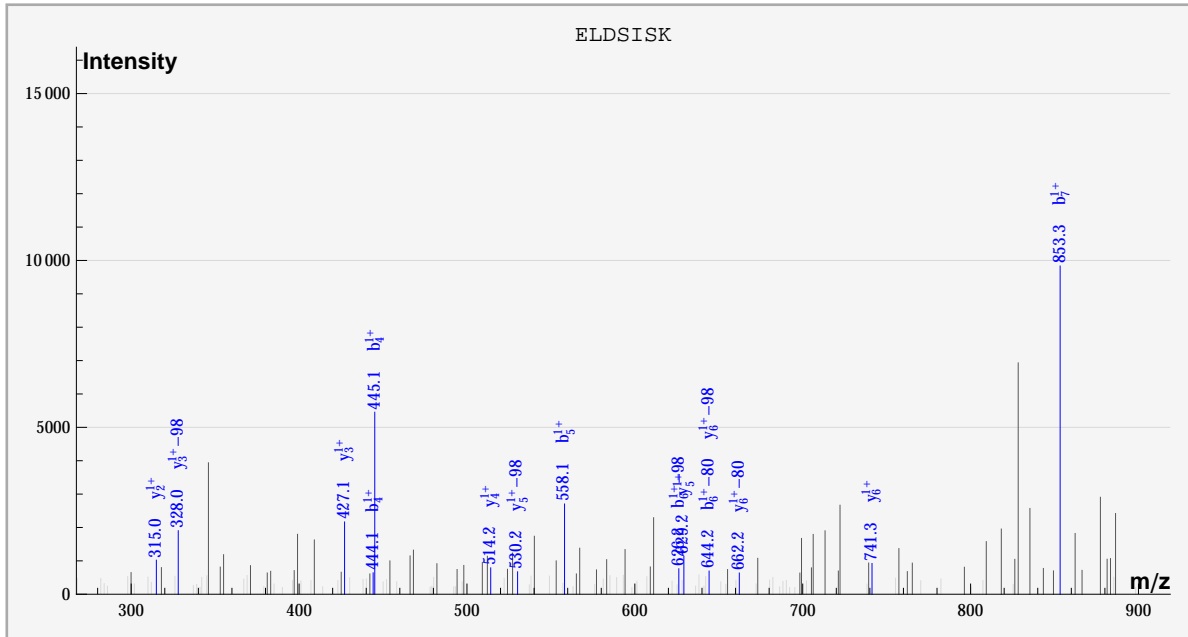

|   | # | b | b* | # | y | y* | P | P* |
|---|---|---|----|---|---|----|---|----|
| E | 1 |   |    |   |   |    |   |    |
| L | 2 |   |    | 6 | ✓ | ✓  |   |    |
| D | 3 |   |    | 5 | ✓ | ✓  |   |    |
| S | 4 | ✓ |    | 4 | ✓ |    |   |    |
| I | 5 | ✓ |    | 3 | ✓ | ✓  |   |    |
| S | 6 |   | ✓  | 2 | ✓ |    |   |    |
| K | 7 | ✓ |    | 1 |   |    |   |    |

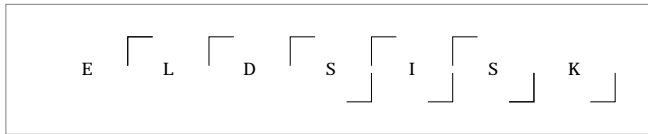

dbValid true ELDSISK PHOS(1) 1. 873. -1.61918 5.35986 100. ? 2616.  
 S\_Acido\_new%gi|68567813|gb|AAY80742.1| ELDSISK%:::PHOS::%sample\_0%compd\_1147

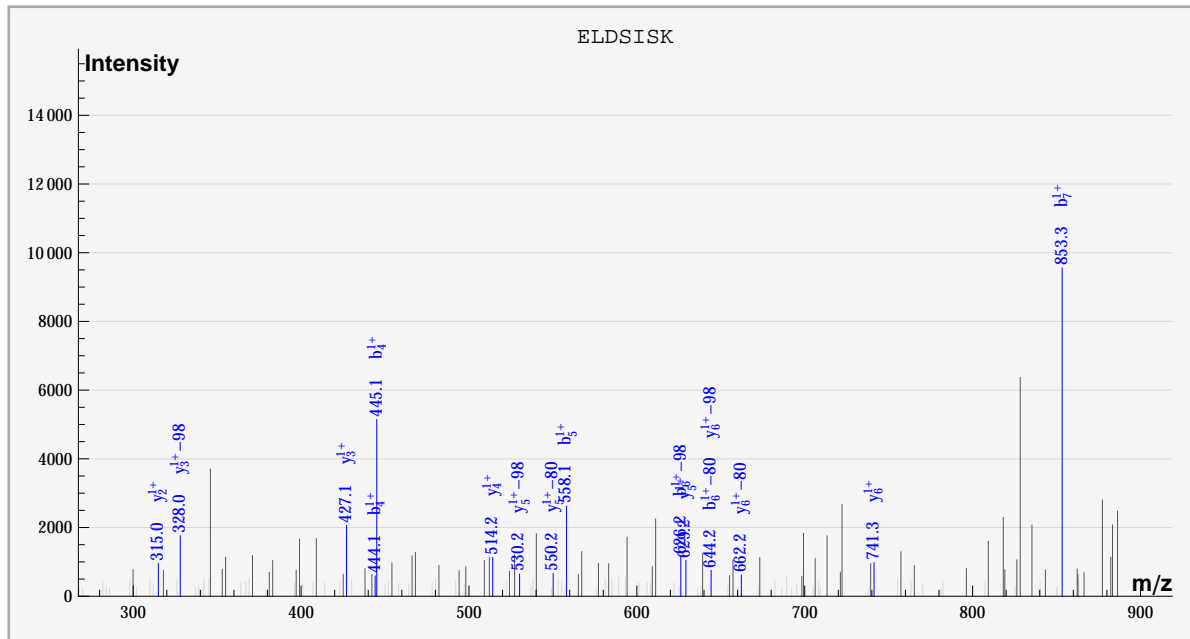

|   | # | b | b* | # | y | y* | P | P* |
|---|---|---|----|---|---|----|---|----|
| E | 1 |   |    |   |   |    |   |    |
| L | 2 |   |    | 6 | ✓ | ✓  |   |    |
| D | 3 |   |    | 5 | ✓ | ✓  |   |    |
| S | 4 | ✓ |    | 4 | ✓ |    |   |    |
| I | 5 | ✓ |    | 3 | ✓ | ✓  |   |    |
| S | 6 |   | ✓  | 2 | ✓ |    |   |    |
| K | 7 | ✓ |    | 1 |   |    |   |    |

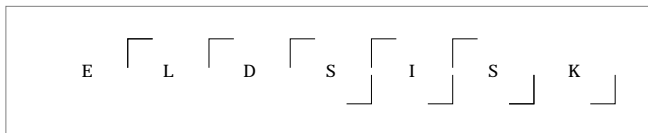

dbValid true ELD SISK PHOS(1) 1. 873. -1.61918 5.11457 100. ? 2628.  
 S\_Acido\_new%gi|68567813|gb|AAY80742.1| ELD SISK%::::::PHOS::%sample\_0%compd\_1157

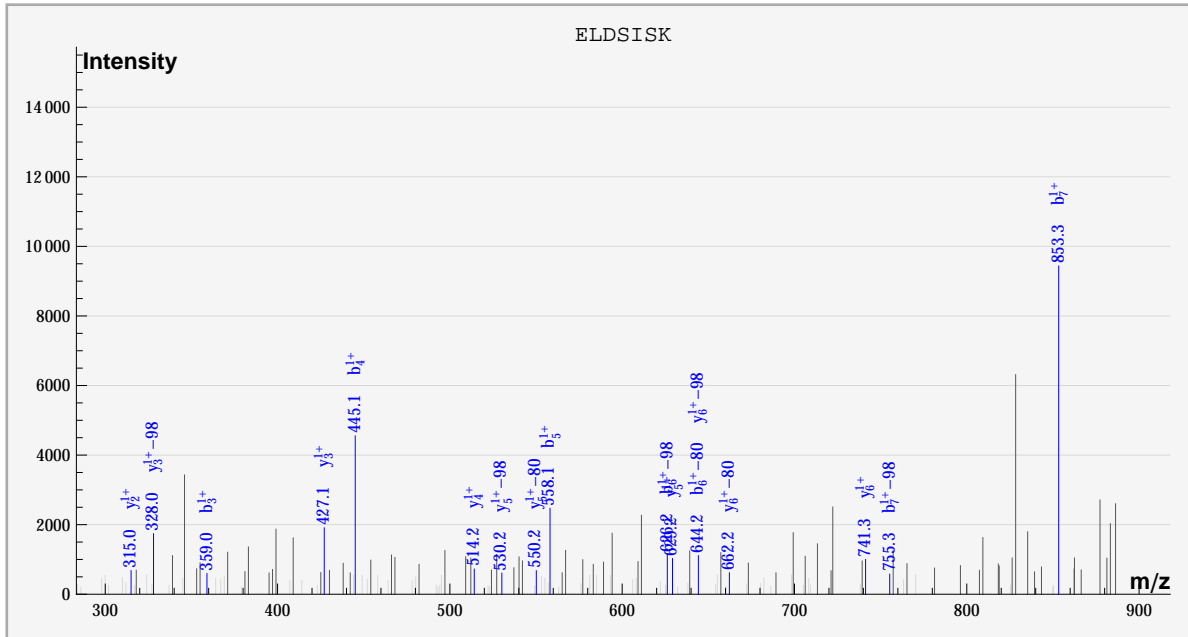

|   | # | b | b* | # | y | y* | P | P* |
|---|---|---|----|---|---|----|---|----|
| E | 1 |   |    |   |   |    |   |    |
| L | 2 |   |    | 6 | ✓ | ✓  |   |    |
| D | 3 | ✓ |    | 5 | ✓ | ✓  |   |    |
| S | 4 | ✓ |    | 4 | ✓ |    |   |    |
| I | 5 | ✓ |    | 3 | ✓ | ✓  |   |    |
| S | 6 |   | ✓  | 2 | ✓ |    |   |    |
| K | 7 | ✓ | ✓  | 1 |   |    |   |    |

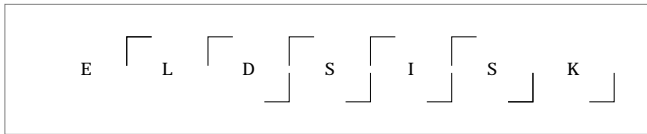

dbValid true ELSISK PHOS(1) 1. 873. -1.61918 5.17008 100. ? 2688.  
 S\_Acido\_new%gi|68567813|gb|AAY80742.1| ELSISK%:::::PHOS::%sample\_0%compd\_1209

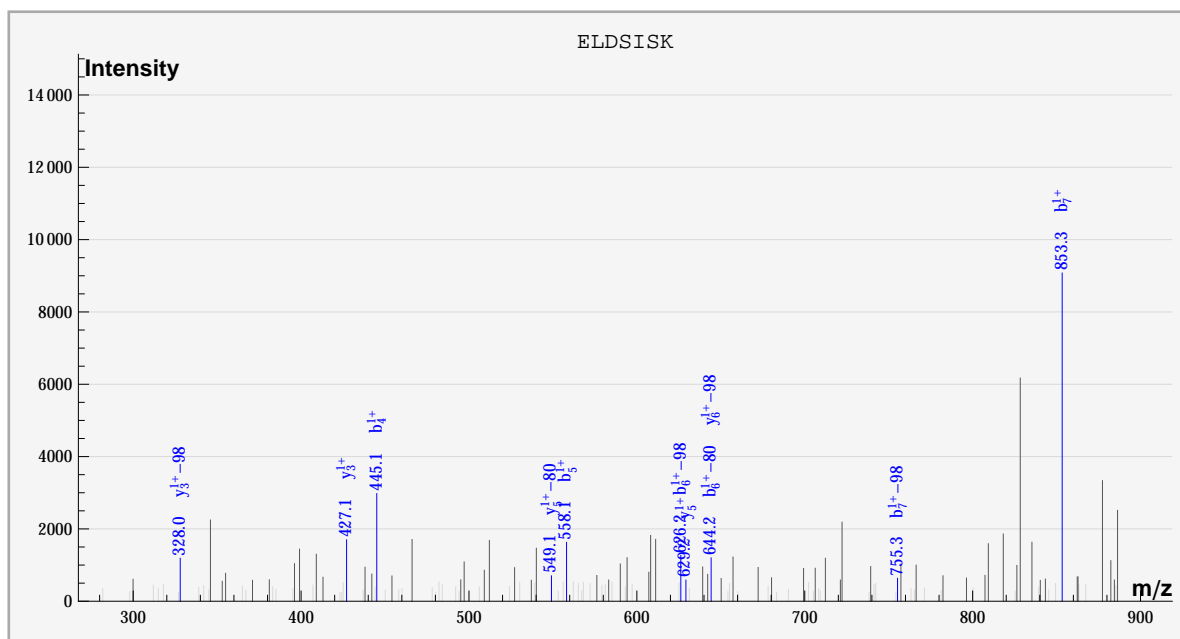

|   | # | b | b* | # | y | y* | P | P* |
|---|---|---|----|---|---|----|---|----|
| E | 1 |   |    |   |   |    |   |    |
| L | 2 |   |    | 6 |   | ✓  |   |    |
| D | 3 |   |    | 5 | ✓ | ✓  |   |    |
| S | 4 | ✓ |    | 4 |   |    |   |    |
| I | 5 | ✓ |    | 3 | ✓ | ✓  |   |    |
| S | 6 |   | ✓  | 2 |   |    |   |    |
| K | 7 | ✓ | ✓  | 1 |   |    |   |    |

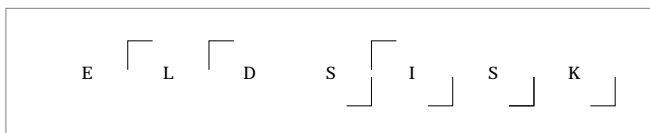

dbValid true ELD SISK PHOS(1) 1. 873.38 -1.99918 5.61058 100. ? 2214.  
 S\_Acido\_new%gi|68567813|gb|AAY80742.1| ELD SISK%:::::PHOS::%sample\_1%compd\_870

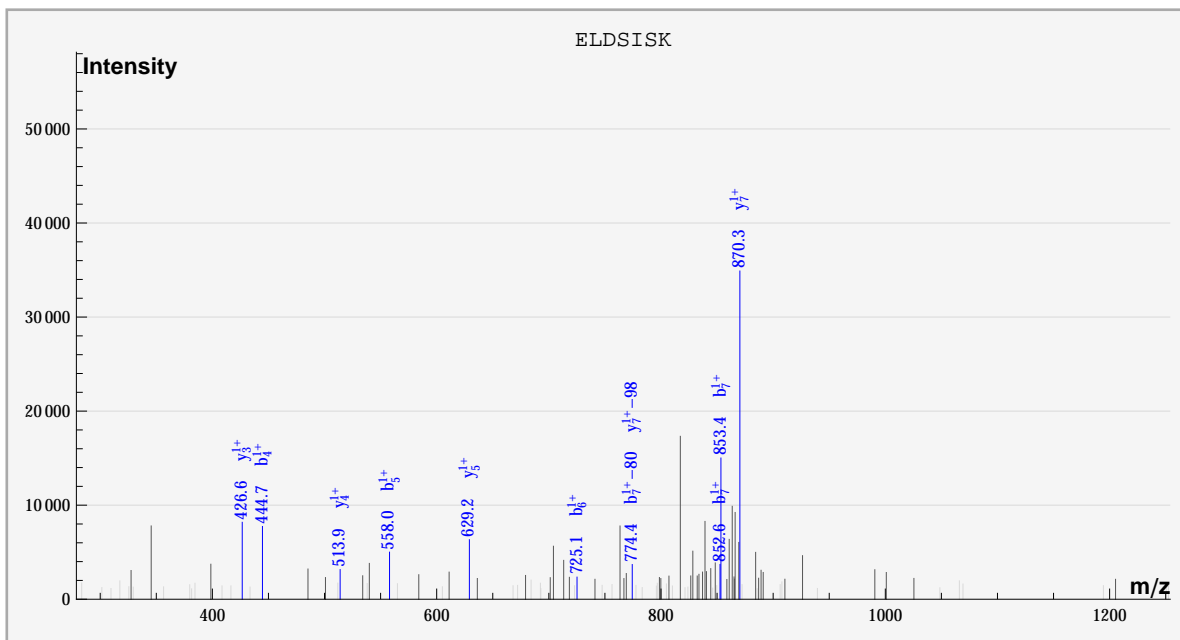

|   | # | b | b* | # | y | y* | P | P* |
|---|---|---|----|---|---|----|---|----|
| E | 1 |   |    |   |   |    | ✓ | ✓  |
| L | 2 |   |    | 6 |   |    |   |    |
| D | 3 |   |    | 5 | ✓ |    |   |    |
| S | 4 | ✓ |    | 4 | ✓ |    |   |    |
| I | 5 | ✓ |    | 3 | ✓ |    |   |    |
| S | 6 | ✓ |    | 2 |   |    |   |    |
| K | 7 | ✓ | ✓  | 1 |   |    |   |    |

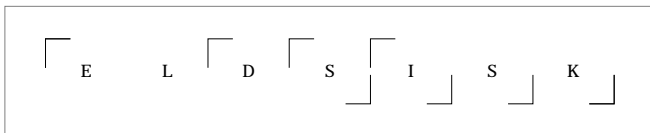

dbValid true EGYDIEITELISK PHOS(3) 2. 874. 1.33722 5.07554 100. ? 1824.

S\_Acido\_new%gi|68567962|gb|AAy80891.1| EGYDIEITELISK%:::PHOS:::PHOS:::PHOS::%sample\_2%compd\_523

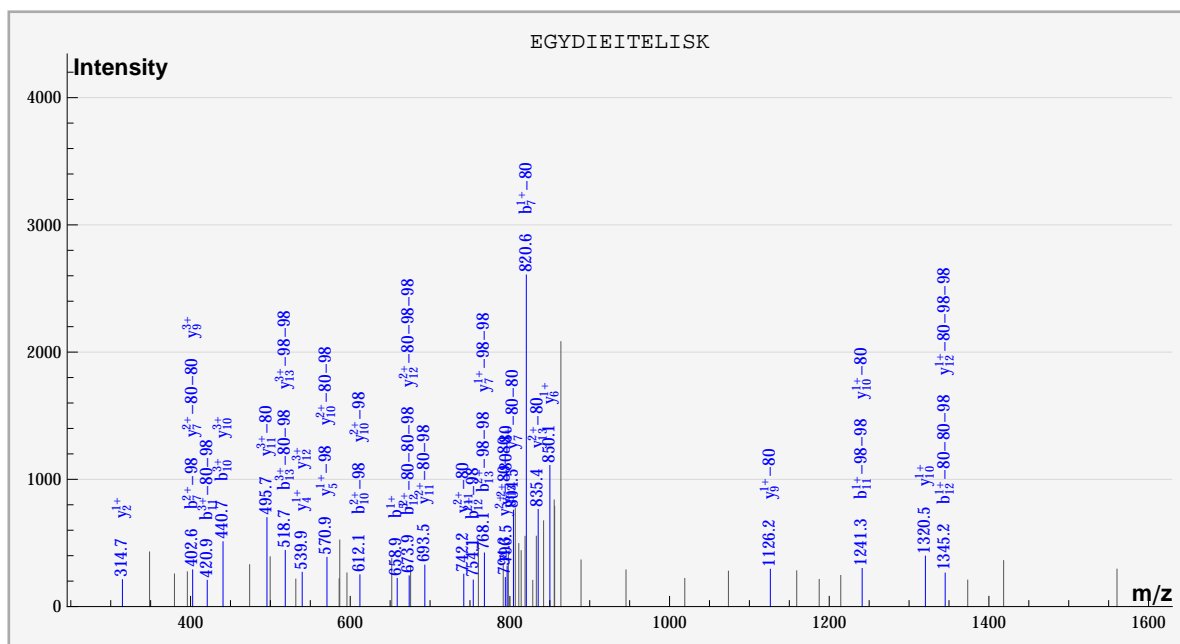

|   | #  | b | b* | #  | y | y* | P | P* |
|---|----|---|----|----|---|----|---|----|
| E | 1  |   |    |    |   |    |   | ✓  |
| G | 2  |   |    | 12 | ✓ | ✓  |   |    |
| Y | 3  |   |    | 11 |   | ✓  |   |    |
| D | 4  |   |    | 10 | ✓ | ✓  |   |    |
| I | 5  | ✓ |    | 9  | ✓ | ✓  |   |    |
| E | 6  |   |    | 8  |   |    |   |    |
| I | 7  |   | ✓  | 7  |   | ✓  |   |    |
| T | 8  |   |    | 6  | ✓ |    |   |    |
| E | 9  |   |    | 5  |   | ✓  |   |    |
| L | 10 | ✓ | ✓  | 4  | ✓ |    |   |    |
| I | 11 |   | ✓  | 3  |   |    |   |    |
| S | 12 |   | ✓  | 2  | ✓ |    |   |    |
| K | 13 |   | ✓  | 1  |   |    |   |    |

「 E 」 「 G 」 「 Y 」 「 D 」 「 I 」 「 E 」 「 I 」 「 T 」 「 E 」 「 L 」 「 I 」 「 S 」 「 K 」

dbValid true KMYIIK PHOS(1) 1. 874. 1.44602 5.22857 100. ? 2166.  
 S\_Acido\_new%gi|68566895|gb|AAY79824.1| KMYIIK%:::PHOS:::%sample\_2%compd\_833

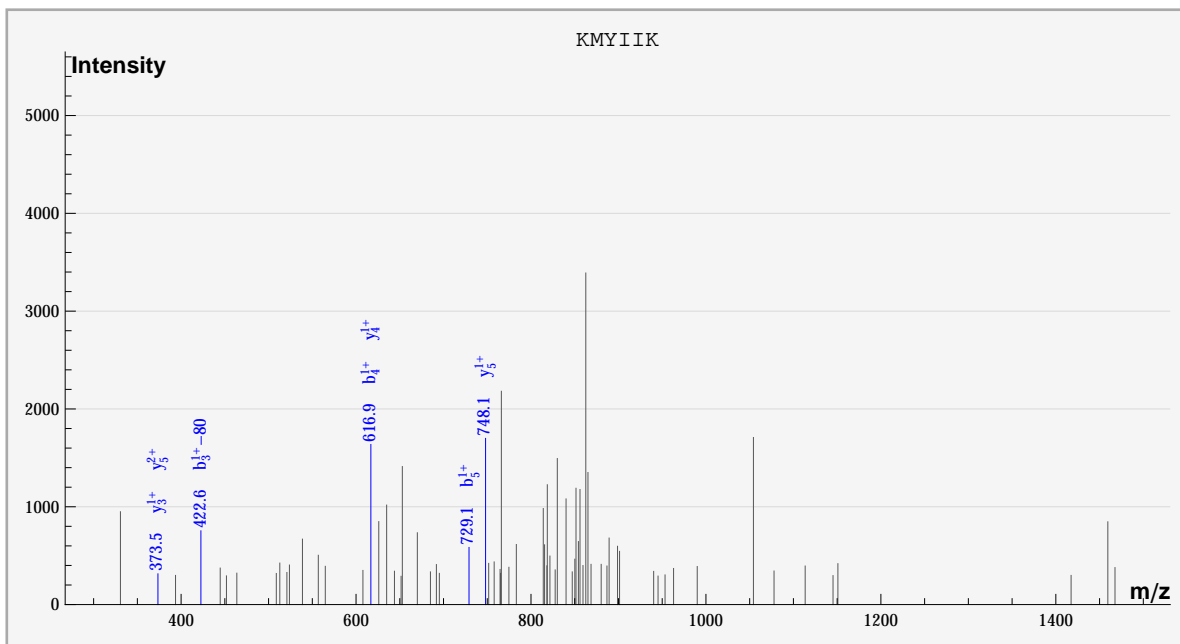

|   | # | b | b* | # | y | y* | P | P* |
|---|---|---|----|---|---|----|---|----|
| K | 1 |   |    |   |   |    |   |    |
| M | 2 |   |    | 5 | ✓ |    |   |    |
| Y | 3 | ✓ |    | 4 | ✓ |    |   |    |
| I | 4 | ✓ |    | 3 | ✓ |    |   |    |
| I | 5 | ✓ |    | 2 |   |    |   |    |
| K | 6 |   |    | 1 |   |    |   |    |

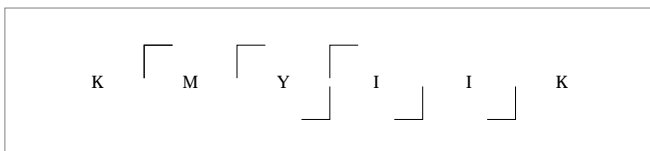

dbValid true YASEDK PHOS(2) 1. 874. -1.75259 5.18837 100. ? 2316.  
 S\_Acido\_new%gi|68567162|gb|AAY80091.1| YASEDK%:PHOS::PHOS:::sample\_0%cmpd\_894

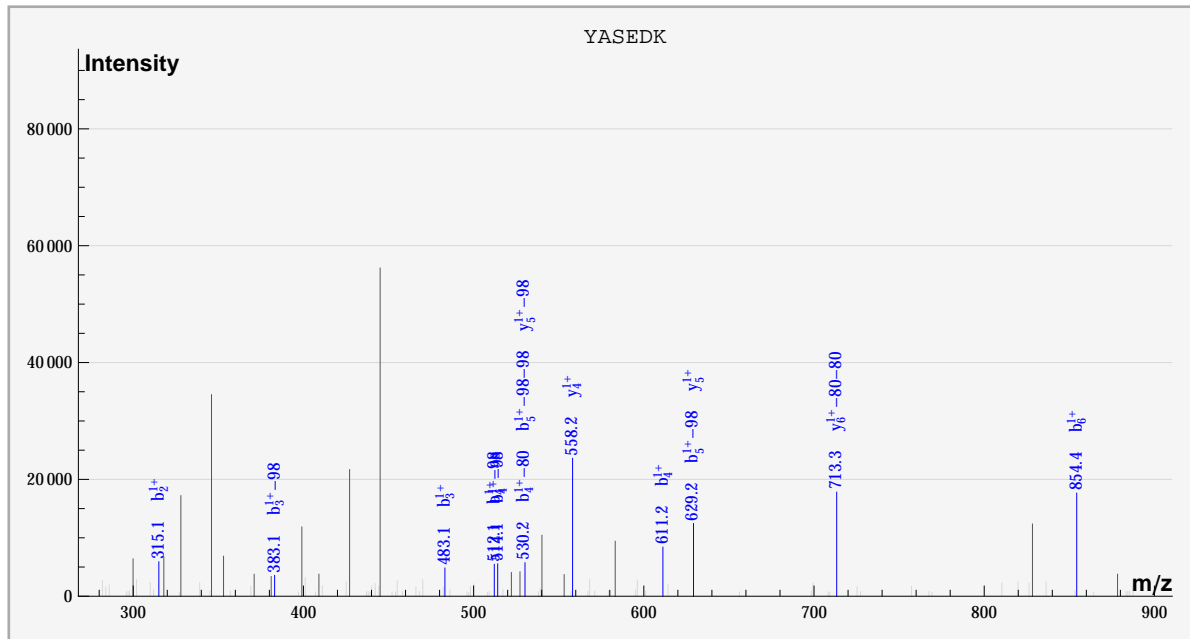

|   | # | b | b* | # | y | y* | P | P* |
|---|---|---|----|---|---|----|---|----|
| Y | 1 |   |    |   |   |    |   | ✓  |
| A | 2 | ✓ |    | 5 | ✓ | ✓  |   |    |
| S | 3 | ✓ | ✓  | 4 | ✓ |    |   |    |
| E | 4 | ✓ | ✓  | 3 |   |    |   |    |
| D | 5 |   | ✓  | 2 |   |    |   |    |
| K | 6 | ✓ |    | 1 |   |    |   |    |

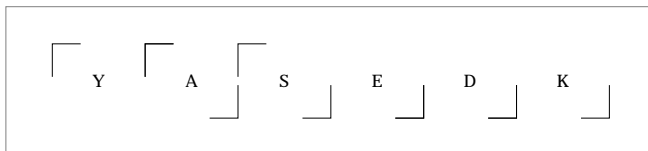



dbValid true YVNAGIR PHOS(1) 1. 874. -1.59744 5.41365 100. ? 2412.  
 S\_Acido\_new%gi|68568023|gb|AAY80952.1| YVNAGIR%:PHOS::::::%sample\_0%compd\_975

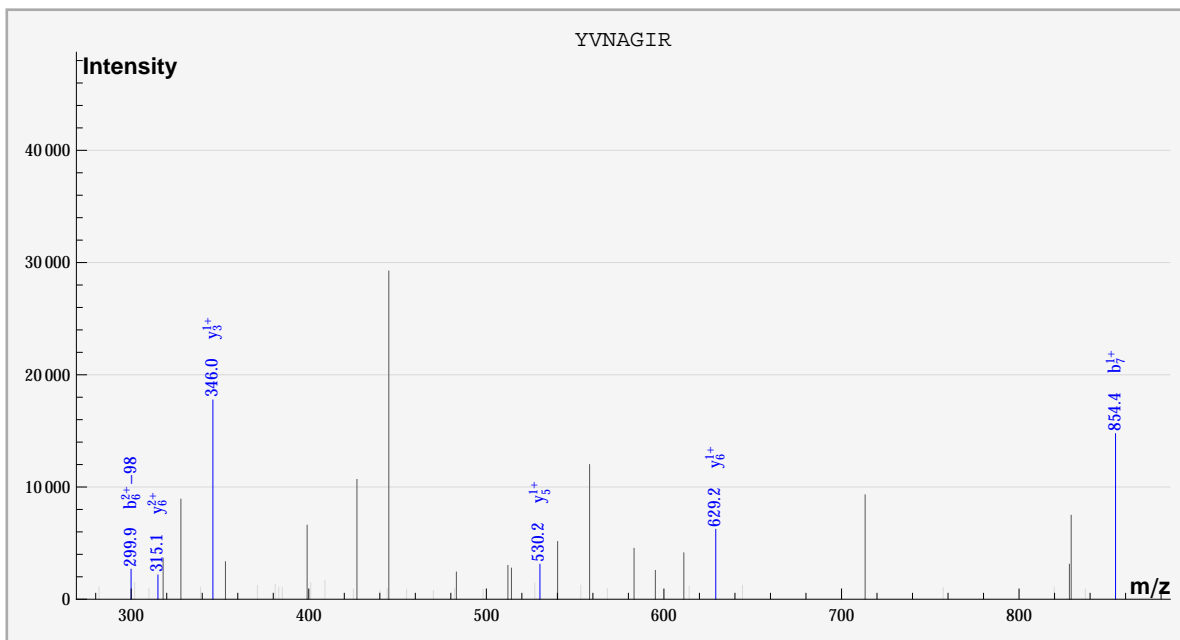

|   | # | b | b* | # | y | y* | P | P* |
|---|---|---|----|---|---|----|---|----|
| Y | 1 |   |    |   |   |    |   |    |
| V | 2 |   |    | 6 | ✓ |    |   |    |
| N | 3 |   |    | 5 | ✓ |    |   |    |
| A | 4 |   |    | 4 |   |    |   |    |
| G | 5 |   |    | 3 | ✓ |    |   |    |
| I | 6 | ✓ |    | 2 |   |    |   |    |
| R | 7 | ✓ |    | 1 |   |    |   |    |

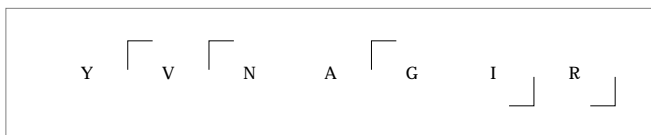

dbValid true ESRGIGSVFSVTKFR PHOS(1) 2. 874. 1.4378 5.14888 100. ? 2664.  
 S\_Acido\_new%gi|68568343|gb|AAY81272.1| ESRGIGSVFSVTKFR%::PHOS:.....%sample\_2%compd\_1287

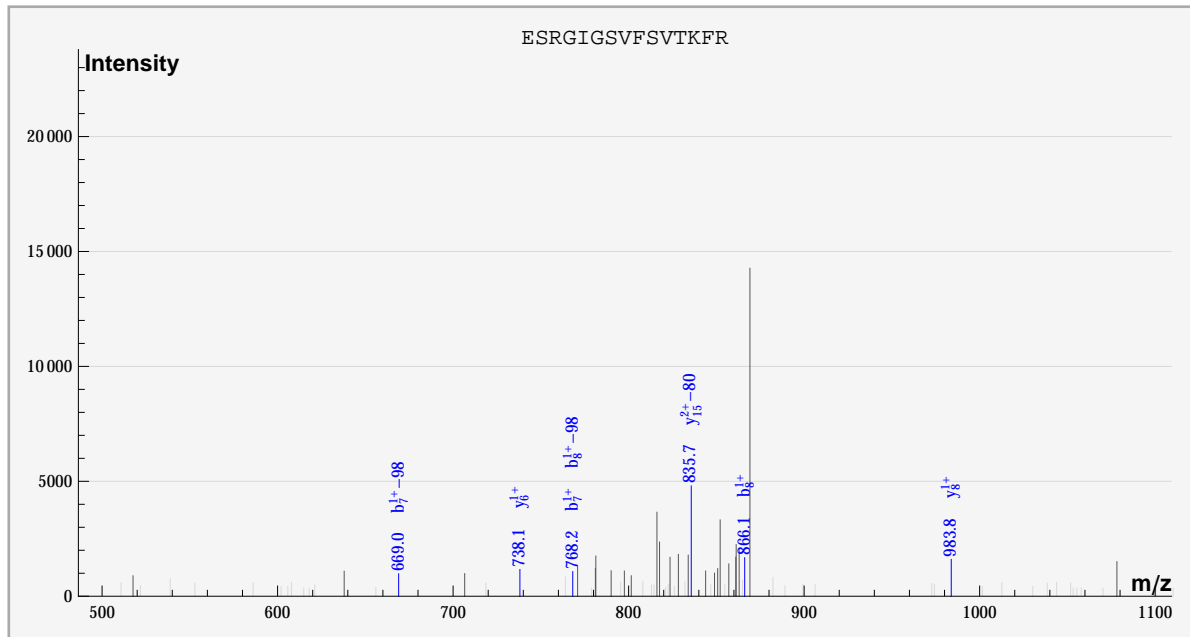

|   | #  | b | b* | #  | y | y* | P | P* |
|---|----|---|----|----|---|----|---|----|
| E | 1  |   |    |    |   |    |   | ✓  |
| S | 2  |   |    | 14 |   |    |   |    |
| R | 3  |   |    | 13 |   |    |   |    |
| G | 4  |   |    | 12 |   |    |   |    |
| I | 5  |   |    | 11 |   |    |   |    |
| G | 6  |   |    | 10 |   |    |   |    |
| S | 7  | ✓ | ✓  | 9  |   |    |   |    |
| V | 8  | ✓ | ✓  | 8  | ✓ |    |   |    |
| F | 9  |   |    | 7  |   |    |   |    |
| S | 10 |   |    | 6  | ✓ |    |   |    |
| V | 11 |   |    | 5  |   |    |   |    |
| T | 12 |   |    | 4  |   |    |   |    |
| K | 13 |   |    | 3  |   |    |   |    |
| F | 14 |   |    | 2  |   |    |   |    |
| R | 15 |   |    | 1  |   |    |   |    |

ESRIGSVFSVTKFR

dbValid true GPLYSTR PHOS(1) 1. 874. -0.613415 5.02673 100. ? 2712.  
 S\_Acido\_new%gi|68568518|gb|AAY81447.1| GPLYSTR%::::::PHOS::%sample\_2%cmpd\_1332

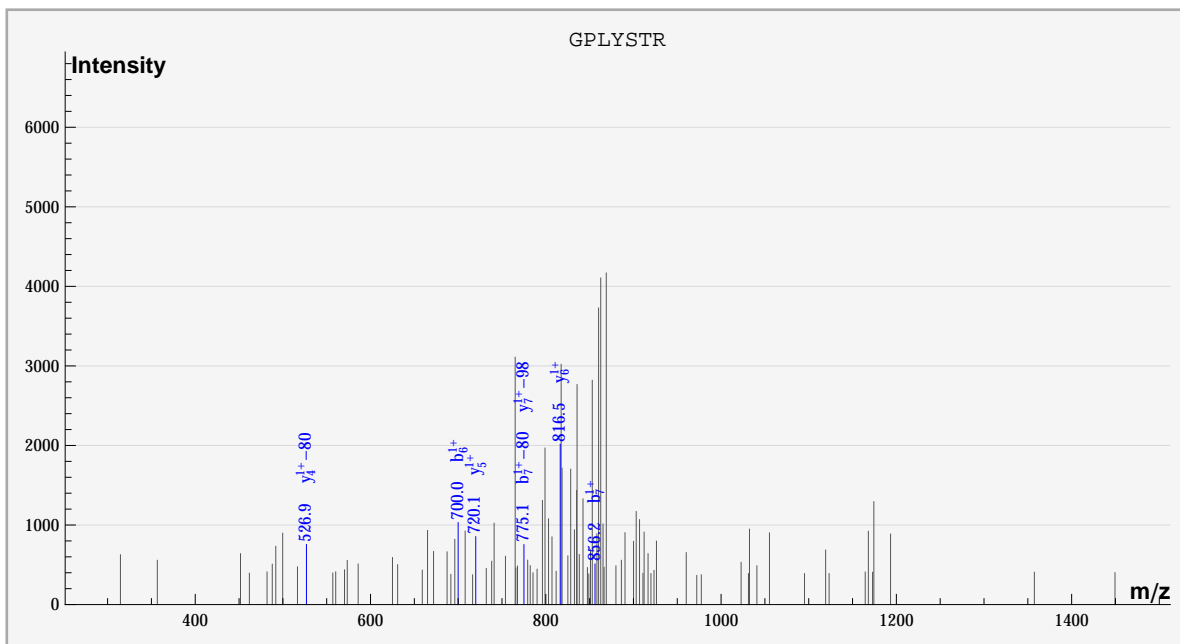

|   | # | b | b* | # | y | y* | P | P* |
|---|---|---|----|---|---|----|---|----|
| G | 1 |   |    |   |   |    |   | ✓  |
| P | 2 |   |    | 6 | ✓ |    |   |    |
| L | 3 |   |    | 5 | ✓ |    |   |    |
| Y | 4 |   |    | 4 |   | ✓  |   |    |
| S | 5 |   |    | 3 |   |    |   |    |
| T | 6 | ✓ |    | 2 |   |    |   |    |
| R | 7 | ✓ | ✓  | 1 |   |    |   |    |

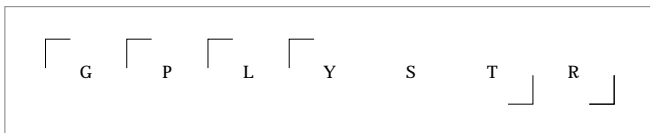

dbValid true YRVVLKGPLETEPIGK PHOS(1) 2. 874. 1.48675 5.11449 100. ? 3162.  
 S\_Acido\_new%gi68568724|gb|AAY81653.1| YRVVLKGPLETEPIGK%:PHOS:::.....%sample\_0%cmpd\_1595

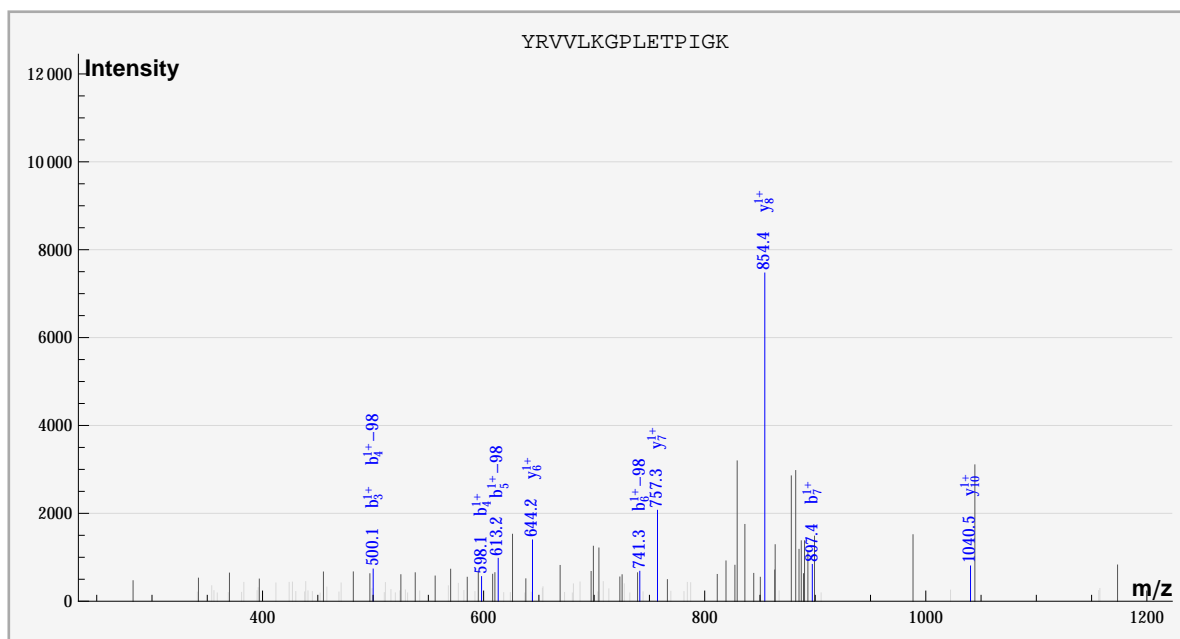

|   | #  | b | b* | #  | y | y* | P | P* |
|---|----|---|----|----|---|----|---|----|
| Y | 1  |   |    |    |   |    |   |    |
| R | 2  |   |    | 14 |   |    |   |    |
| V | 3  | ✓ |    | 13 |   |    |   |    |
| V | 4  | ✓ | ✓  | 12 |   |    |   |    |
| L | 5  |   | ✓  | 11 |   |    |   |    |
| K | 6  |   | ✓  | 10 | ✓ |    |   |    |
| G | 7  | ✓ |    | 9  |   |    |   |    |
| P | 8  |   |    | 8  | ✓ |    |   |    |
| L | 9  |   |    | 7  | ✓ |    |   |    |
| E | 10 |   |    | 6  | ✓ |    |   |    |
| T | 11 |   |    | 5  |   |    |   |    |
| P | 12 |   |    | 4  |   |    |   |    |
| I | 13 |   |    | 3  |   |    |   |    |
| G | 14 |   |    | 2  |   |    |   |    |
| K | 15 |   |    | 1  |   |    |   |    |

Y R V V L K G P L E T P I G K

dbValid true RKIAMEILNYLTK PHOS(2) 2. 875. 1.92957 5.08299 100. ? 4434.

S\_Acido\_new%gi|68566567|gb|AA79496.1| RKIAMEILNYLTK%:::PHOS::PHOS::%sample\_2%compd\_2908

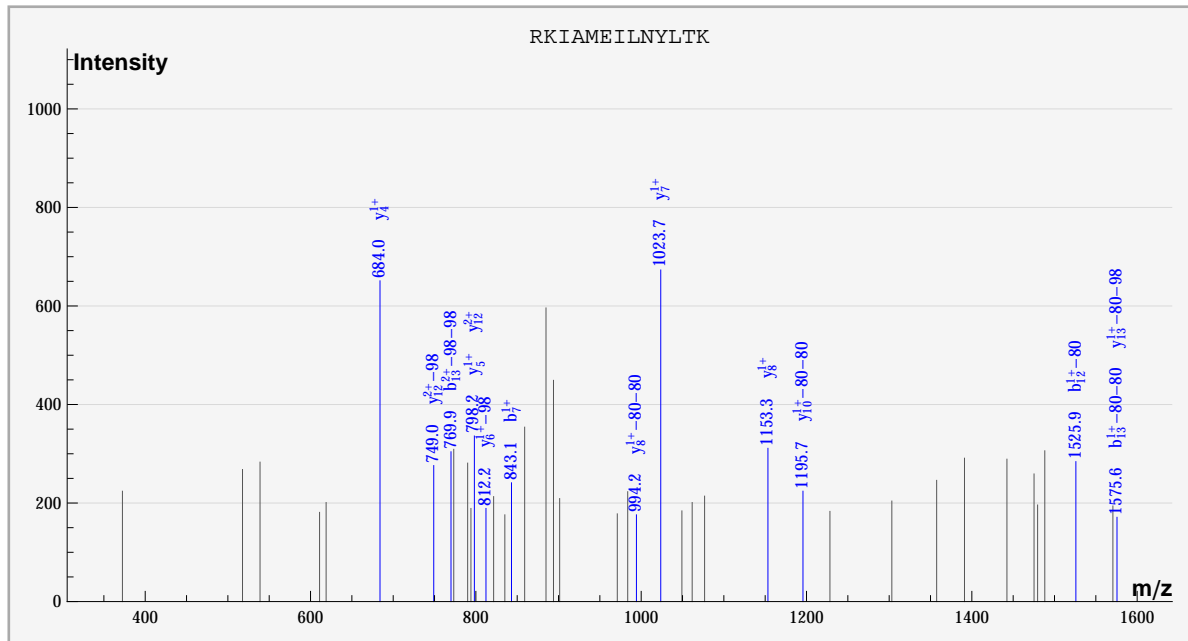

|   | #  | b | b* | #  | y | y* | P | P* |
|---|----|---|----|----|---|----|---|----|
| R | 1  |   |    |    |   |    |   | ✓  |
| K | 2  |   |    | 12 | ✓ | ✓  |   |    |
| I | 3  |   |    | 11 |   |    |   |    |
| A | 4  |   |    | 10 |   | ✓  |   |    |
| M | 5  |   |    | 9  |   |    |   |    |
| E | 6  |   |    | 8  | ✓ | ✓  |   |    |
| I | 7  | ✓ |    | 7  | ✓ |    |   |    |
| L | 8  |   |    | 6  |   | ✓  |   |    |
| N | 9  |   |    | 5  | ✓ |    |   |    |
| Y | 10 |   |    | 4  | ✓ |    |   |    |
| L | 11 |   |    | 3  |   |    |   |    |
| T | 12 |   | ✓  | 2  |   |    |   |    |
| K | 13 |   | ✓  | 1  |   |    |   |    |

「 R 「 K I 「 A M 「 E 「 I 」 L 「 N 「 Y L T 」 K 」

dbValid true YISLSGR PHOS(1) 1. 876. -0.597765 5.70368 100. ? 2202.  
 S\_Acido\_new%gi|68568673|gb|AAY81602.1| YISLSGR%:PHOS:::sample\_2%compd\_869

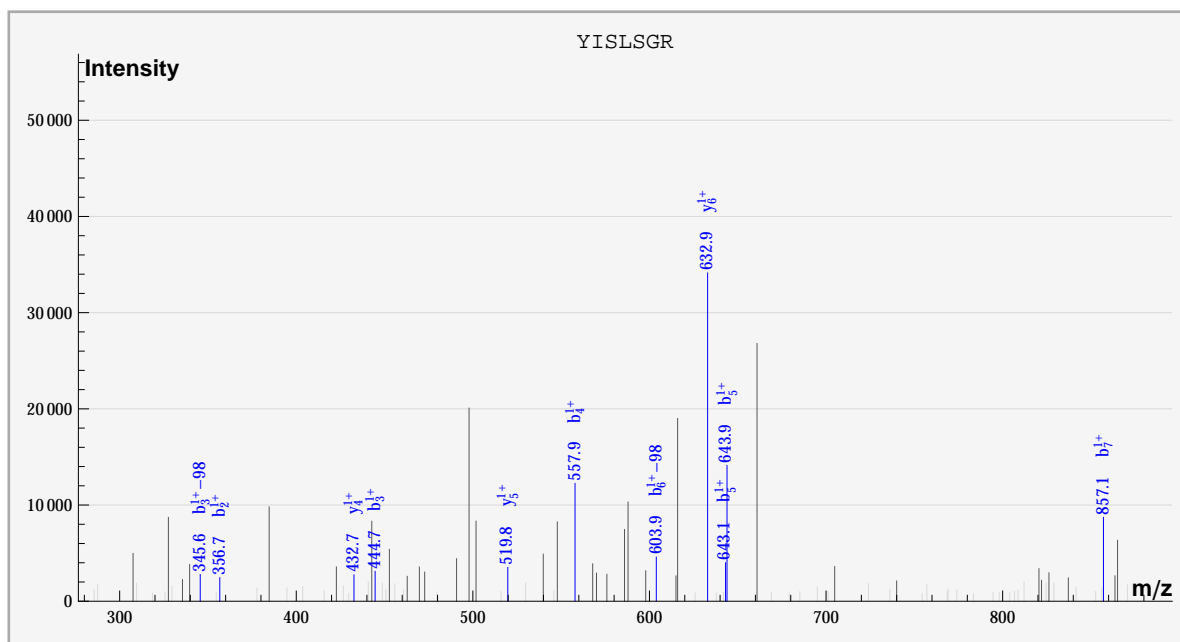

|   | # | b | b* | # | y | y* | P | P* |
|---|---|---|----|---|---|----|---|----|
| Y | 1 |   |    |   |   |    |   |    |
| I | 2 | ✓ |    | 6 | ✓ |    |   |    |
| S | 3 | ✓ | ✓  | 5 | ✓ |    |   |    |
| L | 4 | ✓ |    | 4 | ✓ |    |   |    |
| S | 5 | ✓ |    | 3 |   |    |   |    |
| G | 6 |   | ✓  | 2 |   |    |   |    |
| R | 7 | ✓ |    | 1 |   |    |   |    |

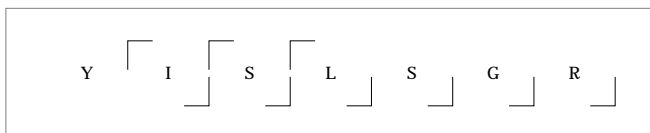

dbValid true KYSMVSTKLSYK PHOS(4) 2. 876. 1.8193 5.25214 100. ? 3006.

S\_Acido\_new%gi|68568081|gb|AA81010.1| KYSMVSTKLSYK::PHOS::PHOS:PHOS::PHOS::%sample\_0%compd\_1463

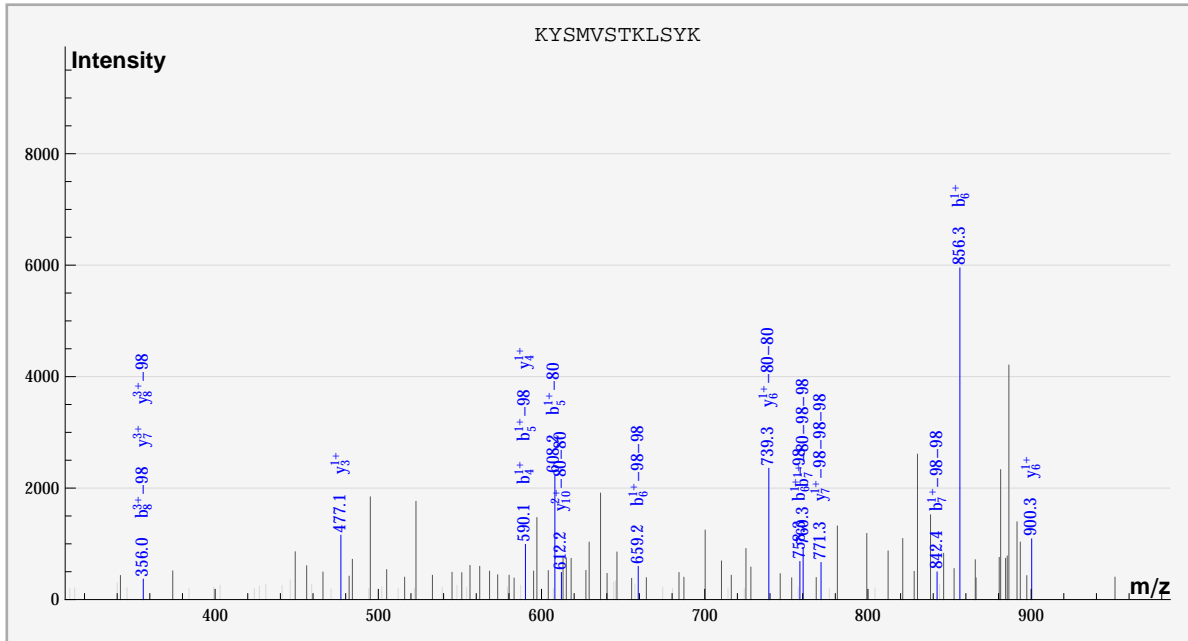

|   | #  | b | b* | #  | y | y* | P | P* |
|---|----|---|----|----|---|----|---|----|
| K | 1  |   |    |    |   |    |   |    |
| Y | 2  |   |    | 11 |   |    |   |    |
| S | 3  |   |    | 10 |   | ✓  |   |    |
| M | 4  | ✓ |    | 9  |   |    |   |    |
| V | 5  |   | ✓  | 8  |   | ✓  |   |    |
| S | 6  | ✓ | ✓  | 7  | ✓ | ✓  |   |    |
| T | 7  |   | ✓  | 6  | ✓ | ✓  |   |    |
| K | 8  |   | ✓  | 5  |   |    |   |    |
| L | 9  |   |    | 4  | ✓ |    |   |    |
| S | 10 |   |    | 3  | ✓ |    |   |    |
| Y | 11 |   |    | 2  |   |    |   |    |
| K | 12 |   |    | 1  |   |    |   |    |

K Y [ S M [ V [ S [ T ] K [ L [ S Y K

dbValid true KYSMVSTKLSYK PHOS(4) 2. 876. 1.8193 5.73377 100. ? 3018.  
 S\_Acido\_new%gi|68568081|gb|AA81010.1| KYSMVSTKLSYK%::PHOS::PHOS:PHOS::PHOS::%sample\_0%cmpd\_1473

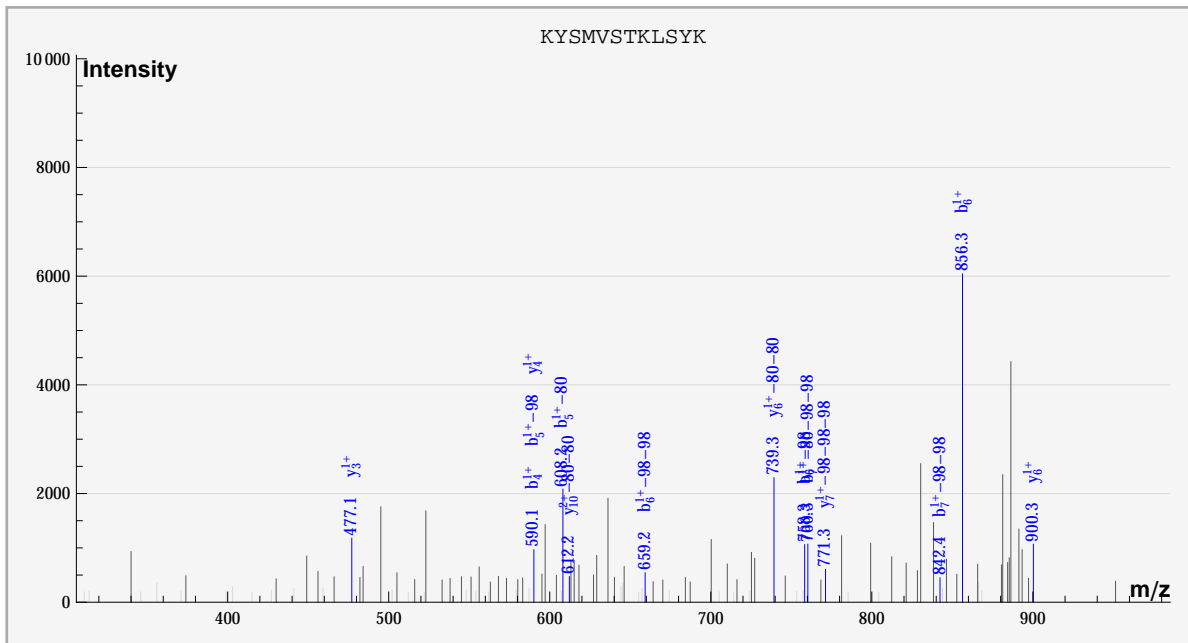

|   | #  | b | b* | #  | y | y* | P | P* |
|---|----|---|----|----|---|----|---|----|
| K | 1  |   |    |    |   |    |   |    |
| Y | 2  |   |    | 11 |   |    |   |    |
| S | 3  |   |    | 10 |   | ✓  |   |    |
| M | 4  | ✓ |    | 9  |   |    |   |    |
| V | 5  |   | ✓  | 8  |   |    |   |    |
| S | 6  | ✓ | ✓  | 7  |   | ✓  |   |    |
| T | 7  |   | ✓  | 6  | ✓ | ✓  |   |    |
| K | 8  |   |    | 5  |   |    |   |    |
| L | 9  |   |    | 4  | ✓ |    |   |    |
| S | 10 |   |    | 3  | ✓ |    |   |    |
| Y | 11 |   |    | 2  |   |    |   |    |
| K | 12 |   |    | 1  |   |    |   |    |

K Y [ S M ] V [ S ] [ T ] K [ L ] [ S ] Y K



dbValid true FMKSIIG PHOS(1) 1. 877. -1.59038 5.26375 100. ? 3126.  
 S\_Acido\_new%gi|68568613|gb|AAY81542.1| FMKSIIG%:::PHOS:::%sample\_0%compd\_1567

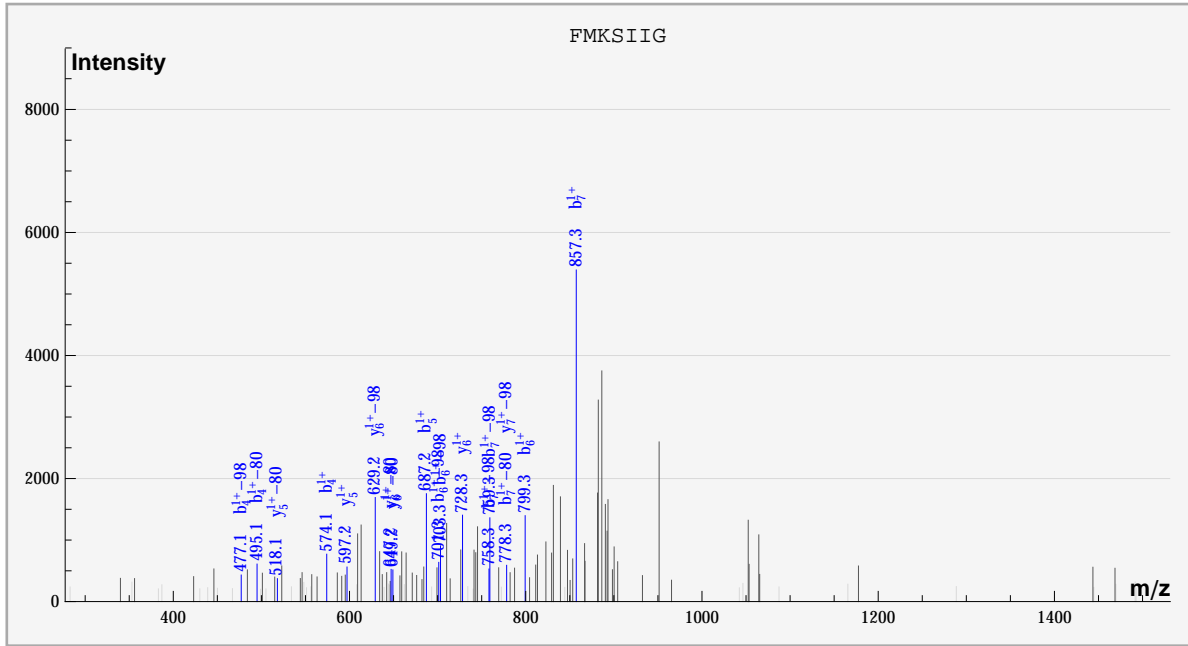

|   | # | b | b* | # | y | y* | P | P* |
|---|---|---|----|---|---|----|---|----|
| F | 1 |   |    |   |   |    |   | ✓  |
| M | 2 |   |    | 6 | ✓ | ✓  |   |    |
| K | 3 |   |    | 5 | ✓ | ✓  |   |    |
| S | 4 | ✓ | ✓  | 4 |   |    |   |    |
| I | 5 | ✓ |    | 3 |   |    |   |    |
| I | 6 | ✓ | ✓  | 2 |   |    |   |    |
| G | 7 | ✓ | ✓  | 1 |   |    |   |    |

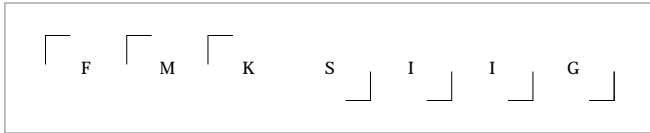

dbValid true FMKSIIG PHOS(1) 1. 877. -1.59038 5.51905 100. ? 3138.  
 S\_Acido\_new%gi|68568613|gb|AAY81542.1| FMKSIIG%:::PHOS:::%sample\_0%compd\_1577

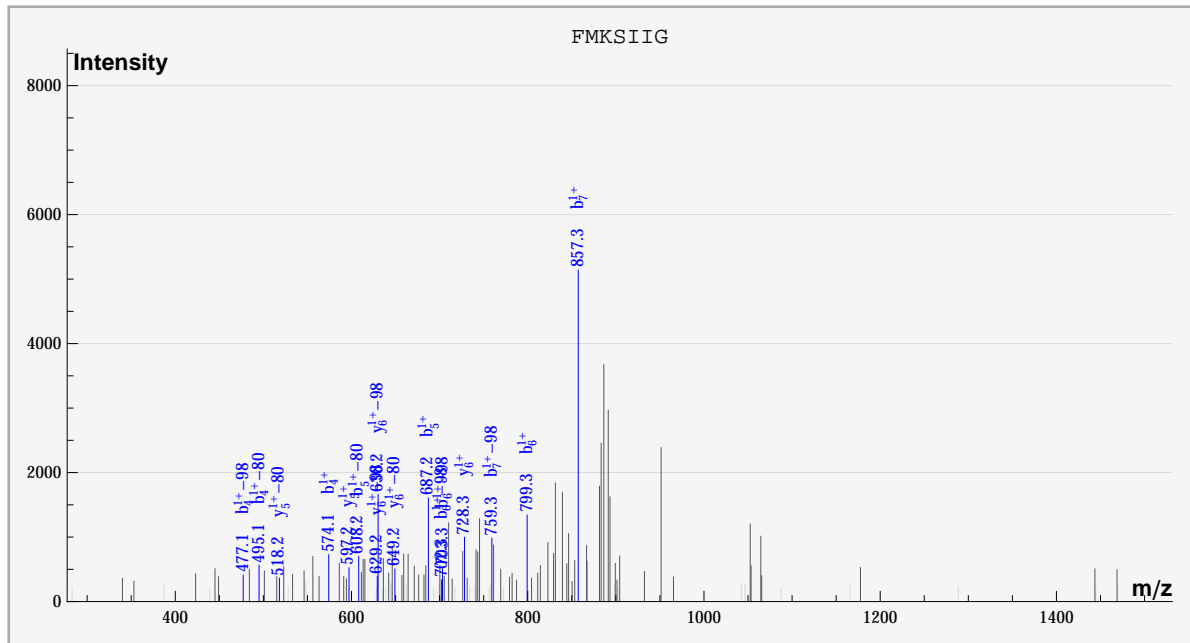

|   | # | b | b* | # | y | y* | P | P* |
|---|---|---|----|---|---|----|---|----|
| F | 1 |   |    |   |   |    |   |    |
| M | 2 |   |    | 6 | ✓ | ✓  |   |    |
| K | 3 |   |    | 5 | ✓ | ✓  |   |    |
| S | 4 | ✓ | ✓  | 4 |   |    |   |    |
| I | 5 | ✓ | ✓  | 3 |   |    |   |    |
| I | 6 | ✓ | ✓  | 2 |   |    |   |    |
| G | 7 | ✓ | ✓  | 1 |   |    |   |    |

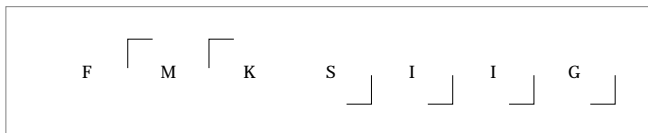

dbValid true FMKSIIG PHOS(1) 1. 877. -1.59038 5.25652 100. ? 3180.  
 S\_Acido\_new%gi|68568613|gb|AAY81542.1| FMKSIIG%:::PHOS:::%sample\_0%compd\_1609

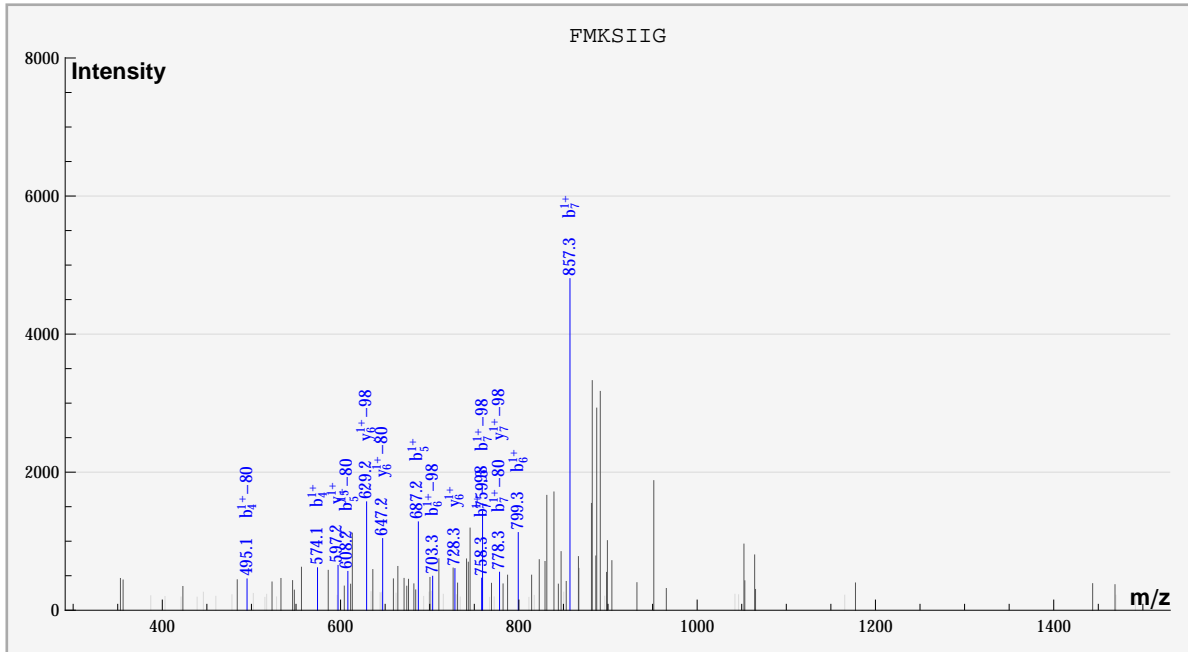

|   | # | b | b* | # | y | y* | P | P* |
|---|---|---|----|---|---|----|---|----|
| F | 1 |   |    |   |   |    |   | ✓  |
| M | 2 |   |    | 6 | ✓ | ✓  |   |    |
| K | 3 |   |    | 5 | ✓ |    |   |    |
| S | 4 | ✓ | ✓  | 4 |   |    |   |    |
| I | 5 | ✓ | ✓  | 3 |   |    |   |    |
| I | 6 | ✓ | ✓  | 2 |   |    |   |    |
| G | 7 | ✓ | ✓  | 1 |   |    |   |    |

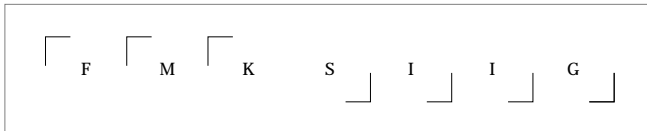

dbValid true EYIFYDSKYKR PHOS(3) 2. 878. -1.67046 5.19885 100. ? 2586.

S\_Acido\_new%gi|68567051|gb|AA79980.1| EYIFYDSKYKR%::PHOS::PHOS::PHOS:::sample\_0%compd\_1122

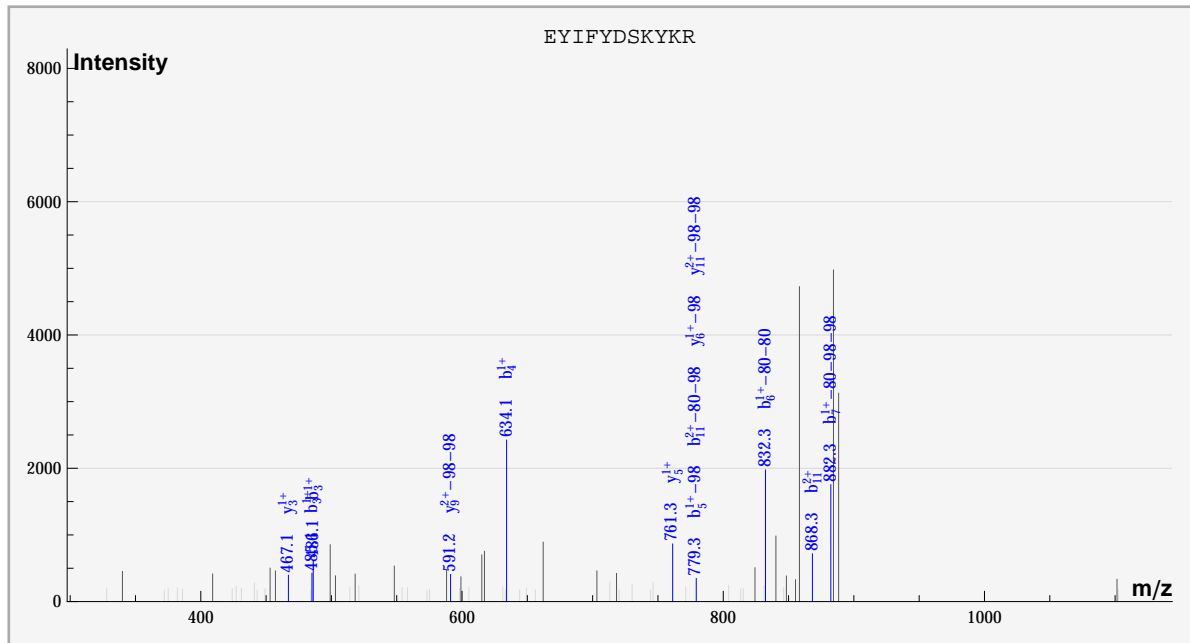

|   | #  | b | b* | #  | y | y* | P | P* |
|---|----|---|----|----|---|----|---|----|
| E | 1  |   |    |    |   |    |   | ✓  |
| Y | 2  |   |    | 10 |   |    |   |    |
| I | 3  | ✓ |    | 9  |   | ✓  |   |    |
| F | 4  | ✓ |    | 8  |   |    |   |    |
| Y | 5  |   | ✓  | 7  |   |    |   |    |
| D | 6  |   | ✓  | 6  |   | ✓  |   |    |
| S | 7  |   | ✓  | 5  | ✓ |    |   |    |
| K | 8  |   |    | 4  |   |    |   |    |
| Y | 9  |   |    | 3  | ✓ |    |   |    |
| K | 10 |   |    | 2  |   |    |   |    |
| R | 11 | ✓ | ✓  | 1  |   |    |   |    |

E Y I F Y D S K Y K R

dbValid true REIIYFLLYKK PHOS(2) 2. 878. 1.95336 5.35813 100. ? 3324.  
 S\_Acido\_new%gi|68567730|gb|AA80659.1| REIIYFLLYKK%:::PHOS:::PHOS:::sample\_3%compd\_1680

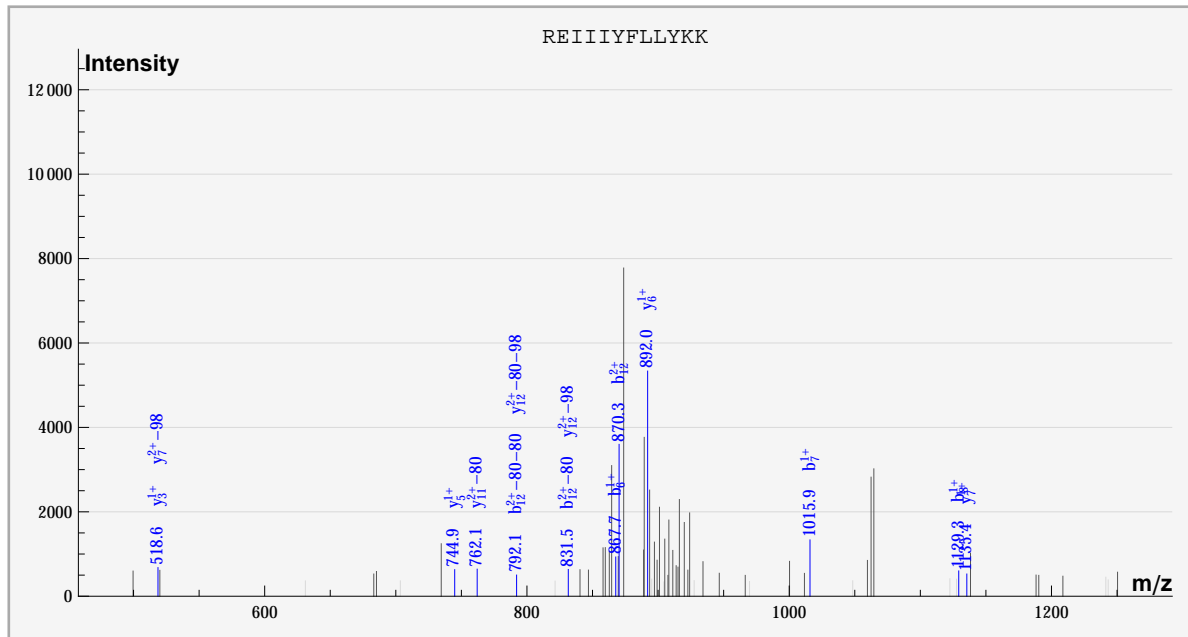

|   | #  | b | b* | #  | y | y* | P | P* |
|---|----|---|----|----|---|----|---|----|
| R | 1  |   |    |    |   |    |   | ✓  |
| E | 2  |   |    | 11 |   | ✓  |   |    |
| I | 3  |   |    | 10 |   |    |   |    |
| I | 4  |   |    | 9  |   |    |   |    |
| I | 5  |   |    | 8  |   |    |   |    |
| Y | 6  | ✓ |    | 7  | ✓ | ✓  |   |    |
| F | 7  | ✓ |    | 6  | ✓ |    |   |    |
| L | 8  | ✓ |    | 5  | ✓ |    |   |    |
| L | 9  |   |    | 4  |   |    |   |    |
| Y | 10 |   |    | 3  | ✓ |    |   |    |
| K | 11 |   |    | 2  |   |    |   |    |
| K | 12 | ✓ | ✓  | 1  |   |    |   |    |

REIIYFLLYKK

dbValid true KYIYIGKYWYK PHOS(3) 2. 881. 1.86556 5.58868 100. ? 1650.

S\_Acido\_new%gi|68567285|gb|AA80214.1| KYIYIGKYWYK%::PHOS:::PHOS::PHOS::%sample\_1%compd\_369

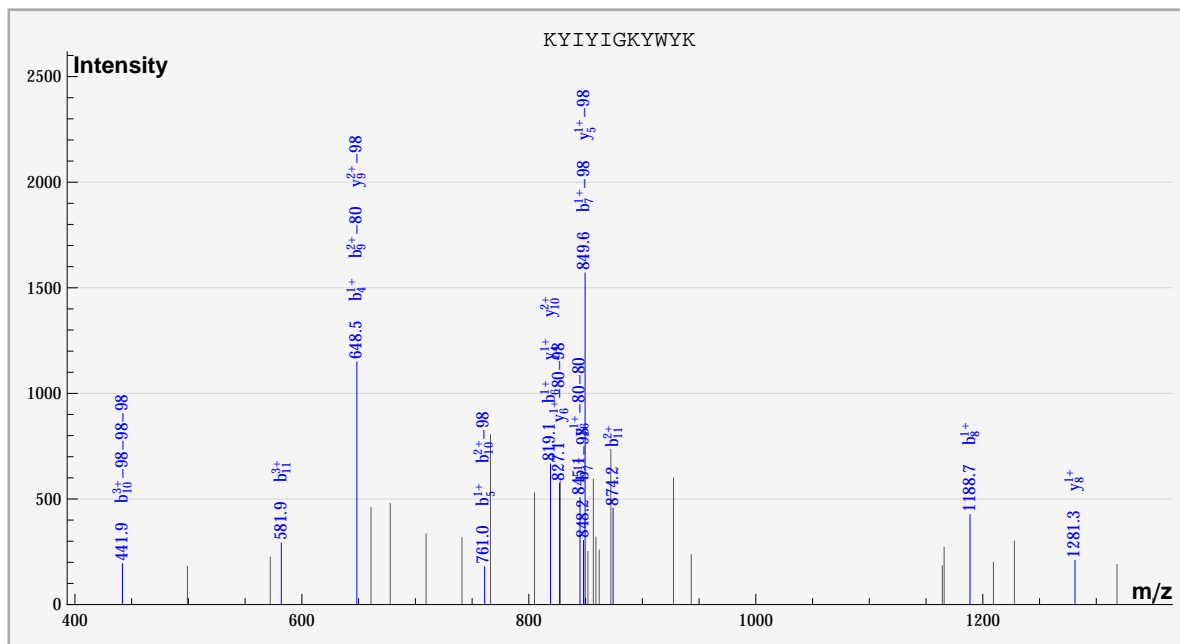

|   | #  | b | b* | #  | y | y* | P | P* |
|---|----|---|----|----|---|----|---|----|
| K | 1  |   |    |    |   |    |   |    |
| Y | 2  |   |    | 10 | ✓ |    |   |    |
| I | 3  |   |    | 9  |   | ✓  |   |    |
| Y | 4  | ✓ |    | 8  | ✓ |    |   |    |
| I | 5  | ✓ |    | 7  |   |    |   |    |
| G | 6  | ✓ |    | 6  |   | ✓  |   |    |
| K | 7  |   | ✓  | 5  |   | ✓  |   |    |
| Y | 8  | ✓ |    | 4  | ✓ |    |   |    |
| W | 9  |   | ✓  | 3  |   |    |   |    |
| Y | 10 |   | ✓  | 2  |   |    |   |    |
| K | 11 | ✓ |    | 1  |   |    |   |    |

K Y I Y I G K Y W Y K

dbValid true SKLPNLK PHOS(1) 1. 881. -1.53009 5.54424 100. ? 2208.

S\_Acido\_new%gi|68567363|gb|AAY80292.1| SKLPNLK%:PHOS::::::%sample\_3%cmpd\_793

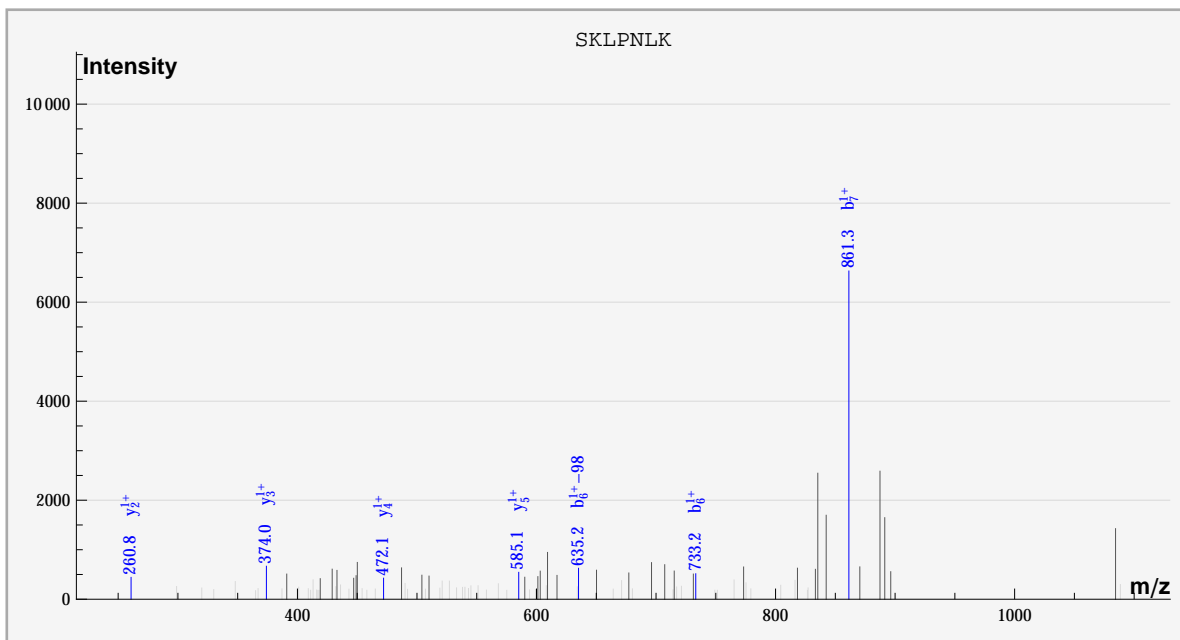

|   | # | b | b* | # | y | y* | P | P* |
|---|---|---|----|---|---|----|---|----|
| S | 1 |   |    |   |   |    |   |    |
| K | 2 |   |    | 6 |   |    |   |    |
| L | 3 |   |    | 5 | ✓ |    |   |    |
| P | 4 |   |    | 4 | ✓ |    |   |    |
| N | 5 |   |    | 3 | ✓ |    |   |    |
| L | 6 | ✓ | ✓  | 2 | ✓ |    |   |    |
| K | 7 | ✓ |    | 1 |   |    |   |    |

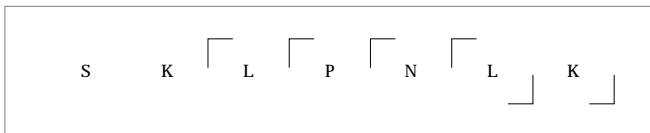

dbValid true SKLPNLK PHOS(1) 1. 881. -1.53009 5.57558 100. ? 2220.

S\_Acido\_new%gi|68567363|gb|AAY80292.1| SKLPNLK%:PHOS:::sample\_3%compd\_803

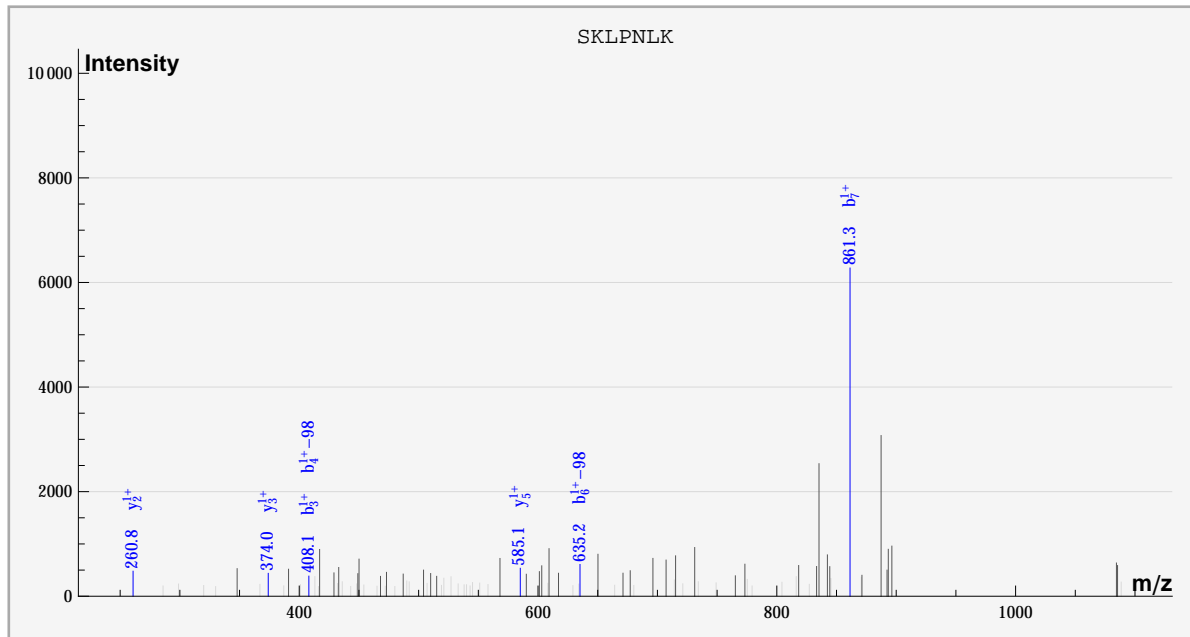

|   | # | b | b* | # | y | y* | P | P* |
|---|---|---|----|---|---|----|---|----|
| S | 1 |   |    |   |   |    |   |    |
| K | 2 |   |    | 6 |   |    |   |    |
| L | 3 | ✓ |    | 5 | ✓ |    |   |    |
| P | 4 |   | ✓  | 4 |   |    |   |    |
| N | 5 |   |    | 3 | ✓ |    |   |    |
| L | 6 |   | ✓  | 2 | ✓ |    |   |    |
| K | 7 | ✓ |    | 1 |   |    |   |    |

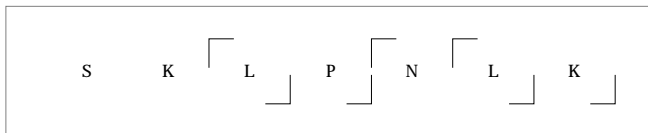



dbValid true SKLPNLK PHOS(1) 1. 881. -1.53009 5.33702 100. ? 2232.

S\_Acido\_new%gi|68567363|gb|AAY80292.1| SKLPNLK%:PHOS:::sample\_3%compd\_813

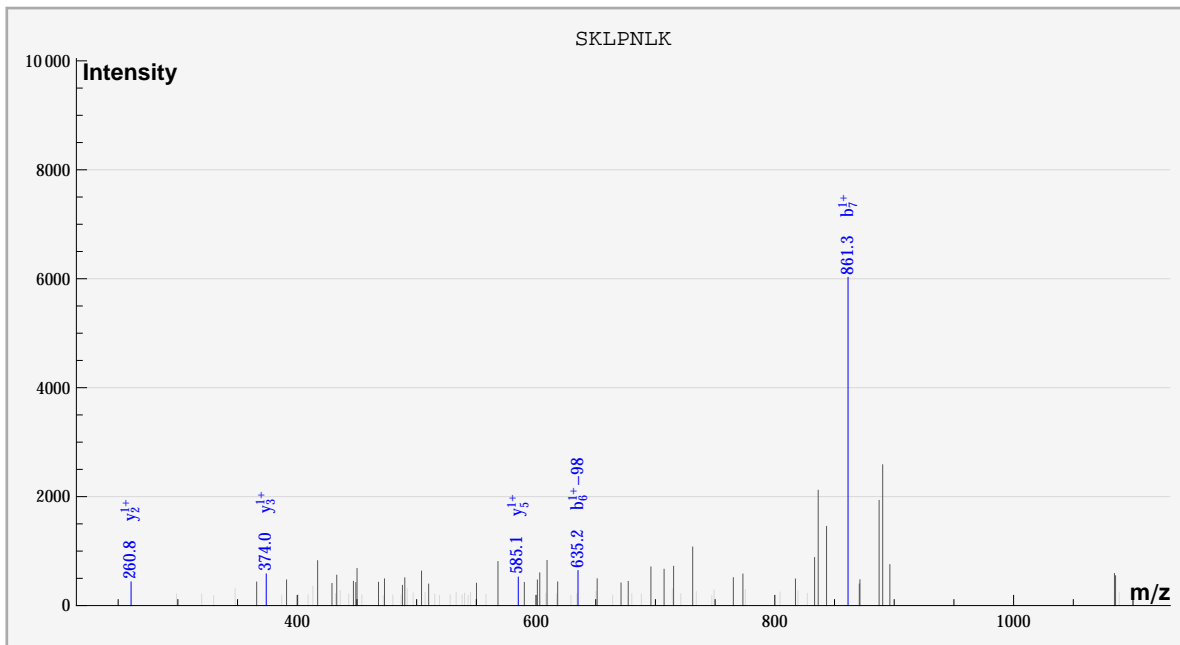

|   | # | b | b* | # | y | y* | P | P* |
|---|---|---|----|---|---|----|---|----|
| S | 1 |   |    |   |   |    |   |    |
| K | 2 |   |    | 6 |   |    |   |    |
| L | 3 |   |    | 5 | ✓ |    |   |    |
| P | 4 |   |    | 4 |   |    |   |    |
| N | 5 |   |    | 3 | ✓ |    |   |    |
| L | 6 | ✓ |    | 2 | ✓ |    |   |    |
| K | 7 | ✓ |    | 1 |   |    |   |    |

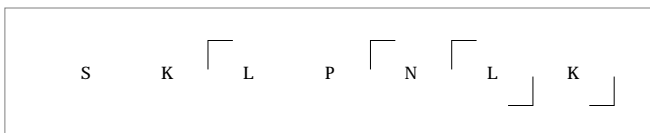

dbValid true SKLPNLK PHOS(1) 1. 881. -1.53009 5.51701 100. ? 2244.

S\_Acido\_new%gi|68567363|gb|AAY80292.1| SKLPNLK%:PHOS:::sample\_3%compd\_824

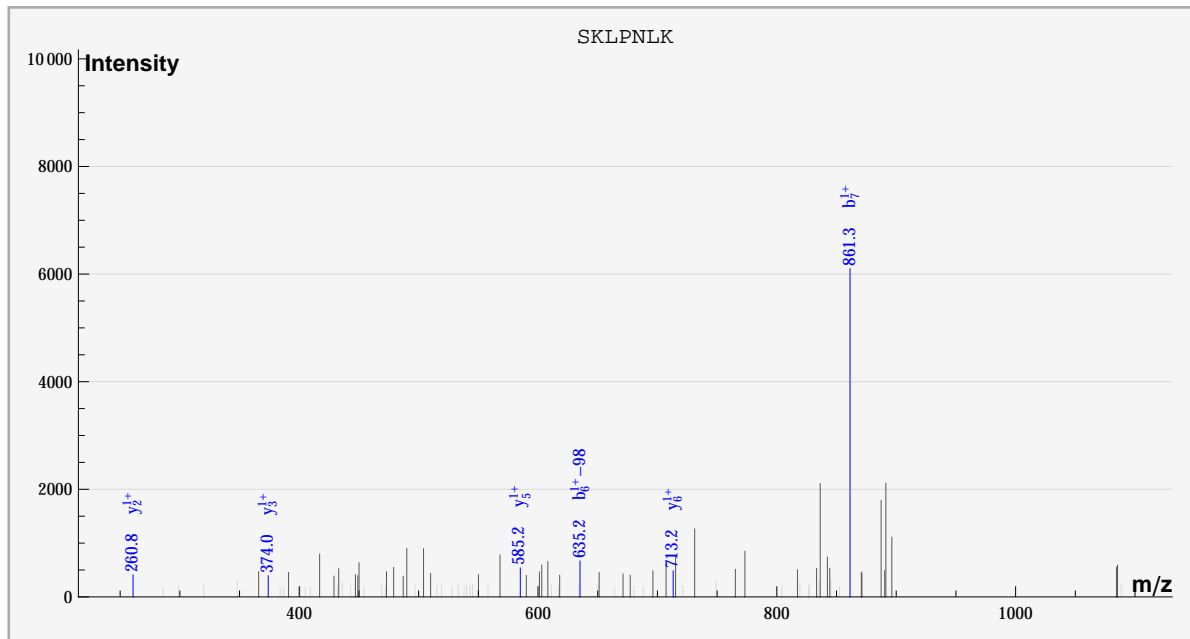

|   | # | b | b* | # | y | y* | P | P* |
|---|---|---|----|---|---|----|---|----|
| S | 1 |   |    |   |   |    |   |    |
| K | 2 |   |    | 6 |   | ✓  |   |    |
| L | 3 |   |    | 5 |   | ✓  |   |    |
| P | 4 |   |    | 4 |   |    |   |    |
| N | 5 |   |    | 3 |   | ✓  |   |    |
| L | 6 |   | ✓  | 2 |   | ✓  |   |    |
| K | 7 | ✓ |    | 1 |   |    |   |    |

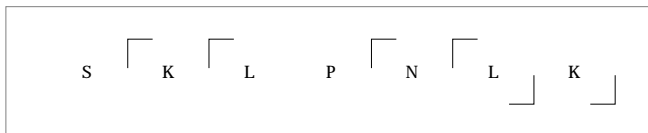

dbValid true SKLPNLK PHOS(1) 1. 881. -1.53009 5.45248 100. ? 2256.

S\_Acido\_new%gi|68567363|gb|AAY80292.1| SKLPNLK%:PHOS::::::%sample\_3%cmpd\_834

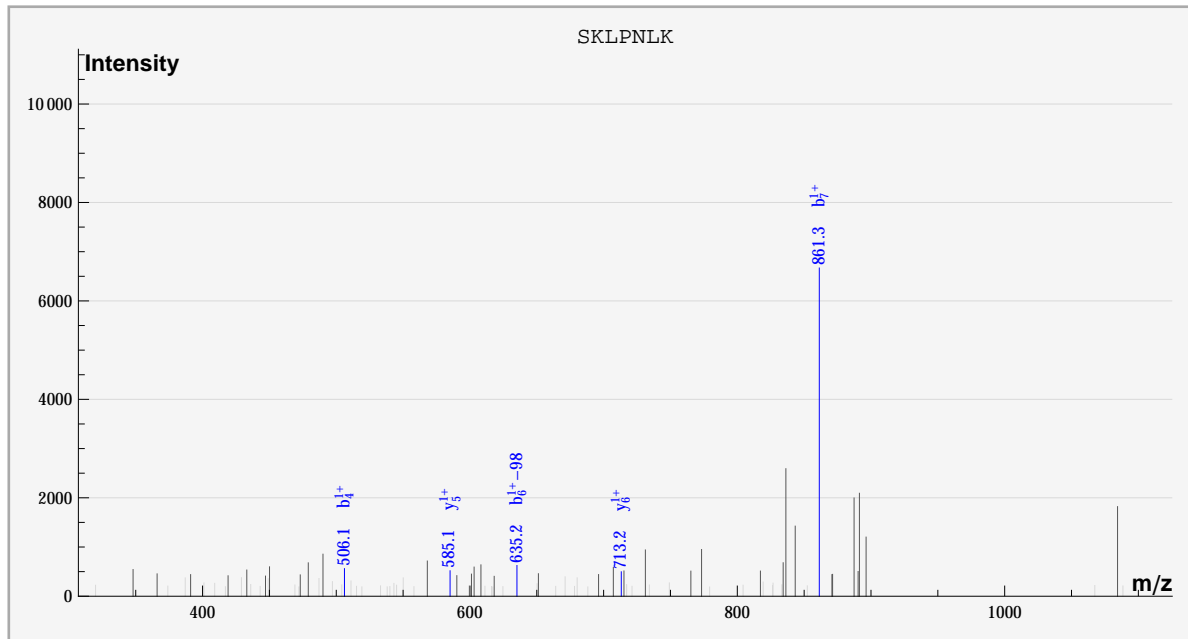

|   | # | b | b* | # | y | y* | P | P* |
|---|---|---|----|---|---|----|---|----|
| S | 1 |   |    |   |   |    |   |    |
| K | 2 |   |    | 6 |   | ✓  |   |    |
| L | 3 |   |    | 5 |   | ✓  |   |    |
| P | 4 | ✓ |    | 4 |   |    |   |    |
| N | 5 |   |    | 3 |   |    |   |    |
| L | 6 |   | ✓  | 2 |   |    |   |    |
| K | 7 | ✓ |    | 1 |   |    |   |    |

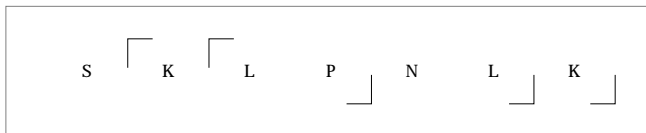

dbValid true YHLNAIKLLKDNLK PHOS(1) 2. 881. 0.984382 5.14129 100. ? 2292.  
 S\_Acido\_new%gi|68567776|gb|AAY80705.1| YHLNAIKLLKDNLK%:PHOS:::::::::::::sample\_3%compd\_864

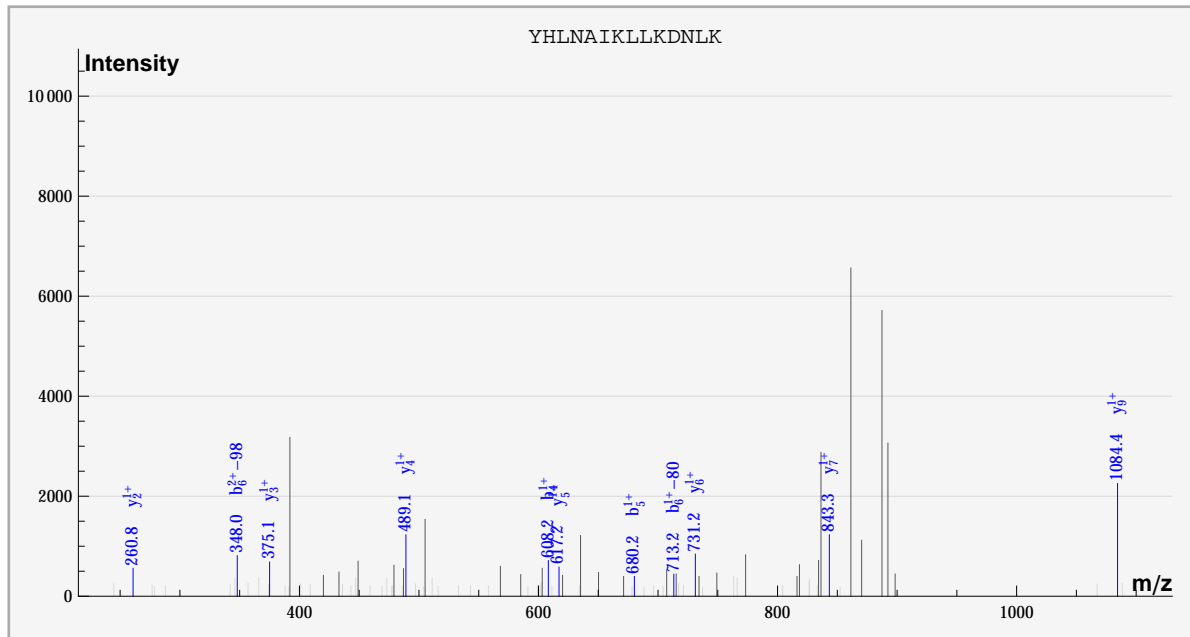

|   | #  | b | b* | #  | y | y* | P | P* |
|---|----|---|----|----|---|----|---|----|
| Y | 1  |   |    |    |   |    |   |    |
| H | 2  |   |    | 13 |   |    |   |    |
| L | 3  |   |    | 12 |   |    |   |    |
| N | 4  | ✓ |    | 11 |   |    |   |    |
| A | 5  | ✓ |    | 10 |   |    |   |    |
| I | 6  |   | ✓  | 9  | ✓ |    |   |    |
| K | 7  |   |    | 8  |   |    |   |    |
| L | 8  |   |    | 7  | ✓ |    |   |    |
| L | 9  |   |    | 6  | ✓ |    |   |    |
| K | 10 |   |    | 5  | ✓ |    |   |    |
| D | 11 |   |    | 4  | ✓ |    |   |    |
| N | 12 |   |    | 3  | ✓ |    |   |    |
| L | 13 |   |    | 2  | ✓ |    |   |    |
| K | 14 |   |    | 1  |   |    |   |    |

Y H L N A I K L L K D N L K

dbValid true YHLNAIKLLKDNLK PHOS(1) 2. 881. 0.984382 5.11347 100. ? 2370.  
 S\_Acido\_new%gi|68567776|gb|AA80705.1| YHLNAIKLLKDNLK%:PHOS:::::::::::::sample\_1%compd\_960

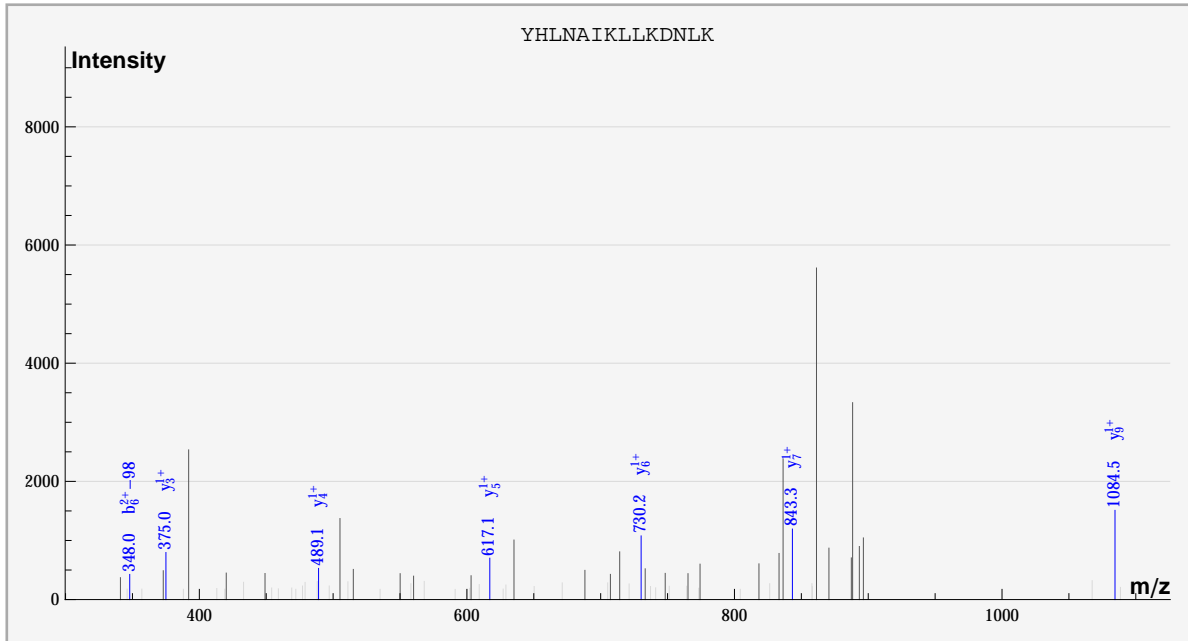

|   | #  | b | b* | #  | y | y* | P | P* |
|---|----|---|----|----|---|----|---|----|
| Y | 1  |   |    |    |   |    |   |    |
| H | 2  |   |    | 13 |   |    |   |    |
| L | 3  |   |    | 12 |   |    |   |    |
| N | 4  |   |    | 11 |   |    |   |    |
| A | 5  |   |    | 10 |   |    |   |    |
| I | 6  | ✓ |    | 9  | ✓ |    |   |    |
| K | 7  |   |    | 8  |   |    |   |    |
| L | 8  |   |    | 7  | ✓ |    |   |    |
| L | 9  |   |    | 6  | ✓ |    |   |    |
| K | 10 |   |    | 5  | ✓ |    |   |    |
| D | 11 |   |    | 4  | ✓ |    |   |    |
| N | 12 |   |    | 3  | ✓ |    |   |    |
| L | 13 |   |    | 2  |   |    |   |    |
| K | 14 |   |    | 1  |   |    |   |    |

Y H L N A I K L L K D N L K

dbValid true LVTYWAATLYNK PHOS(4) 2. 881. 0.820152 5.06903 100. ? 2784.  
 S\_Acido\_new%gi|68567546|gb|AAy80475.1| LVTYWAATLYNK%:::PHOS:PHOS:::PHOS::PHOS:::sample\_2%compd\_1397

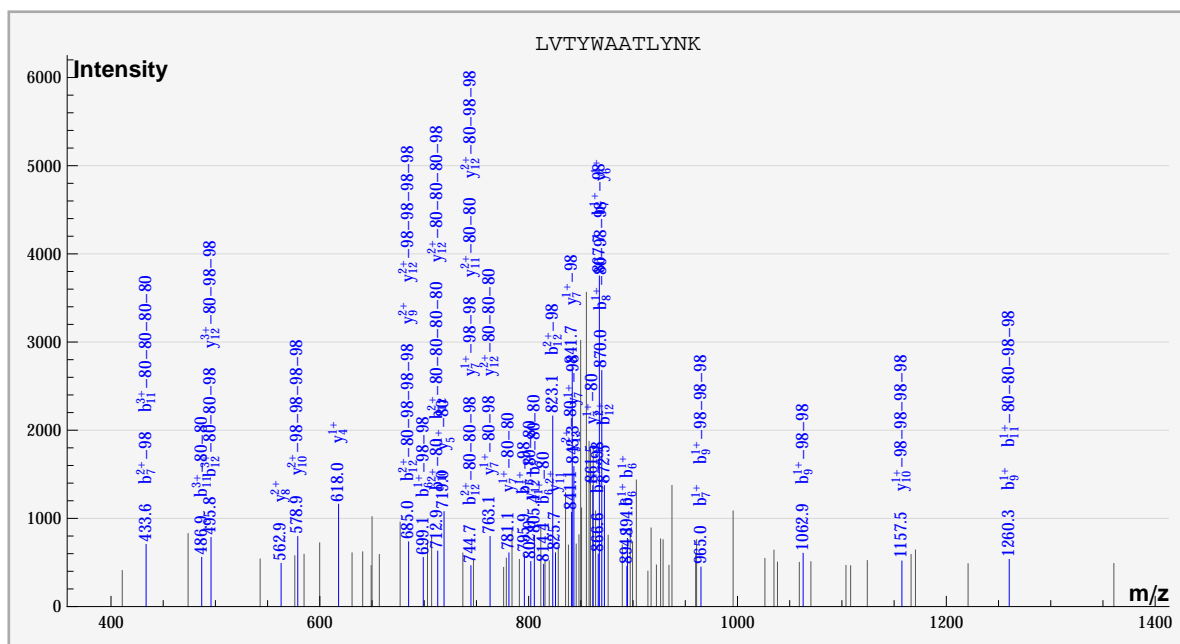

|   | #  | b | b* | #  | y | y* | P | P* |
|---|----|---|----|----|---|----|---|----|
| L | 1  |   |    |    |   |    |   | ✓  |
| V | 2  |   |    | 11 | ✓ | ✓  |   |    |
| T | 3  |   |    | 10 |   | ✓  |   |    |
| Y | 4  |   |    | 9  | ✓ |    |   |    |
| W | 5  |   |    | 8  | ✓ |    |   |    |
| A | 6  | ✓ | ✓  | 7  |   | ✓  |   |    |
| A | 7  | ✓ | ✓  | 6  | ✓ |    |   |    |
| T | 8  |   | ✓  | 5  |   | ✓  |   |    |
| L | 9  | ✓ | ✓  | 4  | ✓ |    |   |    |
| Y | 10 |   | ✓  | 3  |   |    |   |    |
| N | 11 |   | ✓  | 2  |   |    |   |    |
| K | 12 | ✓ | ✓  | 1  |   |    |   |    |

┌ L ─┐ ┌ V ─┐ ┌ T ─┐ ┌ Y ─┐ ┌ W ─┐ ┌ A ─┐ ┌ A ─┐ ┌ T ─┐ ┌ L ─┐ ┌ Y ─┐ ┌ N ─┐ ┌ K ─┐

dbValid true MVMLYK Oxidation\_M(1),PHOS(1) 1. 881. -0.629205 5.22512 100. ? 3996.  
 S\_Acido\_new%gil68568724|gb|AAY81653.1| MVMLYK%:Oxidation\_M:::PHOS::%sample\_1%compd\_2506

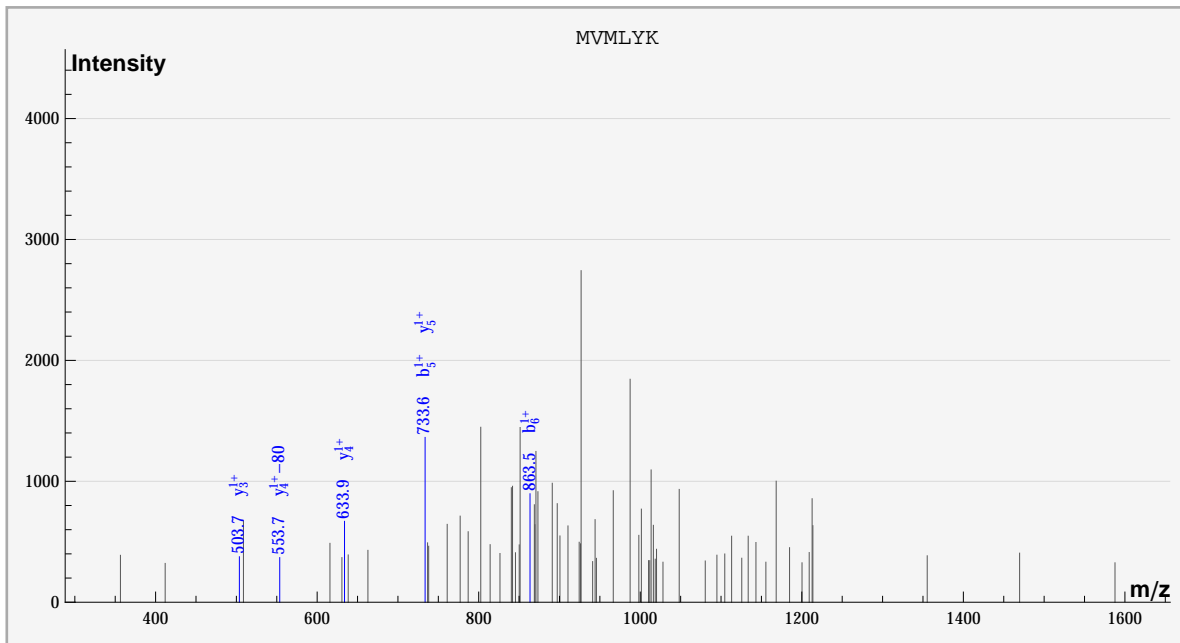

|   | # | b | b* | # | y | y* | P | P* |
|---|---|---|----|---|---|----|---|----|
| M | 1 |   |    |   |   |    |   |    |
| V | 2 |   |    | 5 | ✓ |    |   |    |
| M | 3 |   |    | 4 | ✓ | ✓  |   |    |
| L | 4 |   |    | 3 | ✓ |    |   |    |
| Y | 5 | ✓ |    | 2 |   |    |   |    |
| K | 6 | ✓ |    | 1 |   |    |   |    |

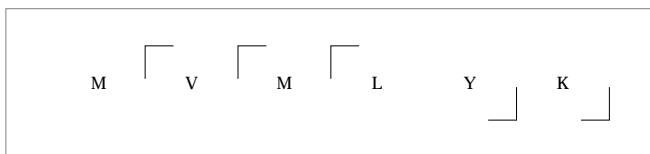

dbValid true VTIIITKK PHOS(1) 1. 882. 0.505965 5.45083 100. ? 2688.  
 S\_Acido\_new%gi|68567016|gb|AAY79945.1| VTIIITKK%::PHOS:::::sample\_2%compd\_1310

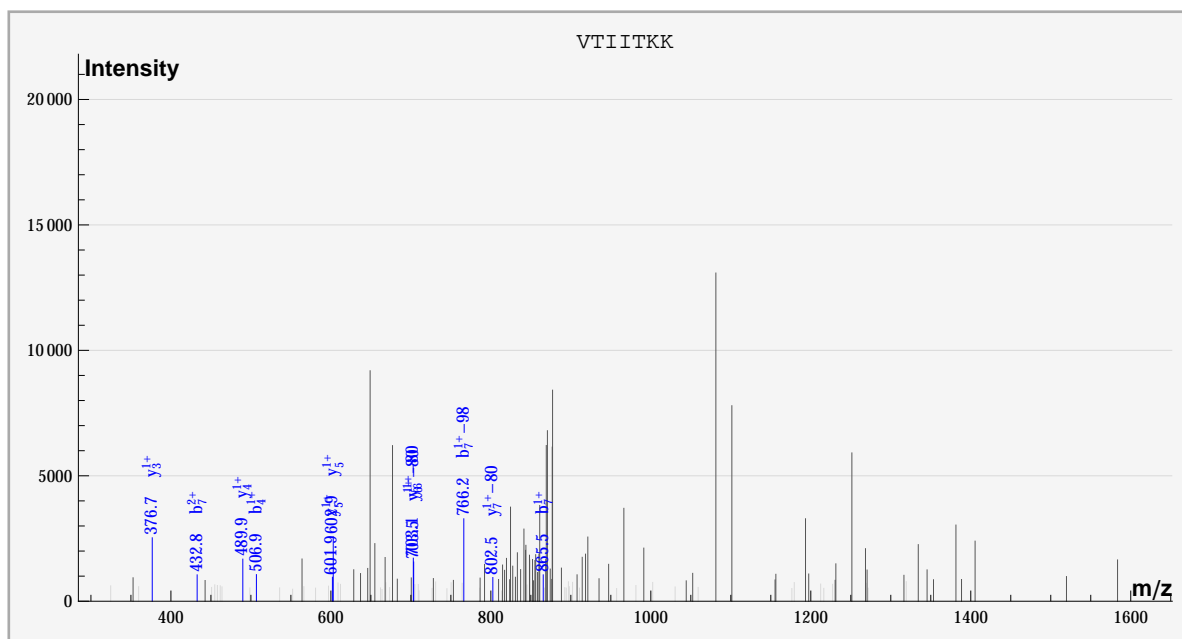

|   | # | b | b* | # | y | y* | P | P* |
|---|---|---|----|---|---|----|---|----|
| V | 1 |   |    |   |   |    |   | ✓  |
| T | 2 |   |    | 6 |   | ✓  |   |    |
| I | 3 |   |    | 5 |   | ✓  |   |    |
| I | 4 | ✓ |    | 4 |   | ✓  |   |    |
| T | 5 |   |    | 3 |   | ✓  |   |    |
| K | 6 |   |    | 2 |   |    |   |    |
| K | 7 | ✓ | ✓  | 1 |   |    |   |    |

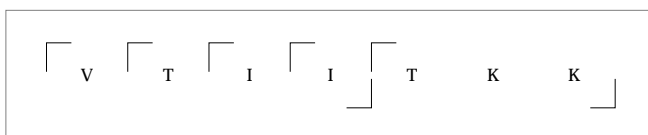



dbValid true VTIIKK PHOS(1) 1. 882. 0.505965 5.89928 100. ? 3036.  
 S\_Acido\_new%gi|68567016|gb|AAY79945.1| VTIIKK%::PHOS:::::sample\_2%compd\_1631

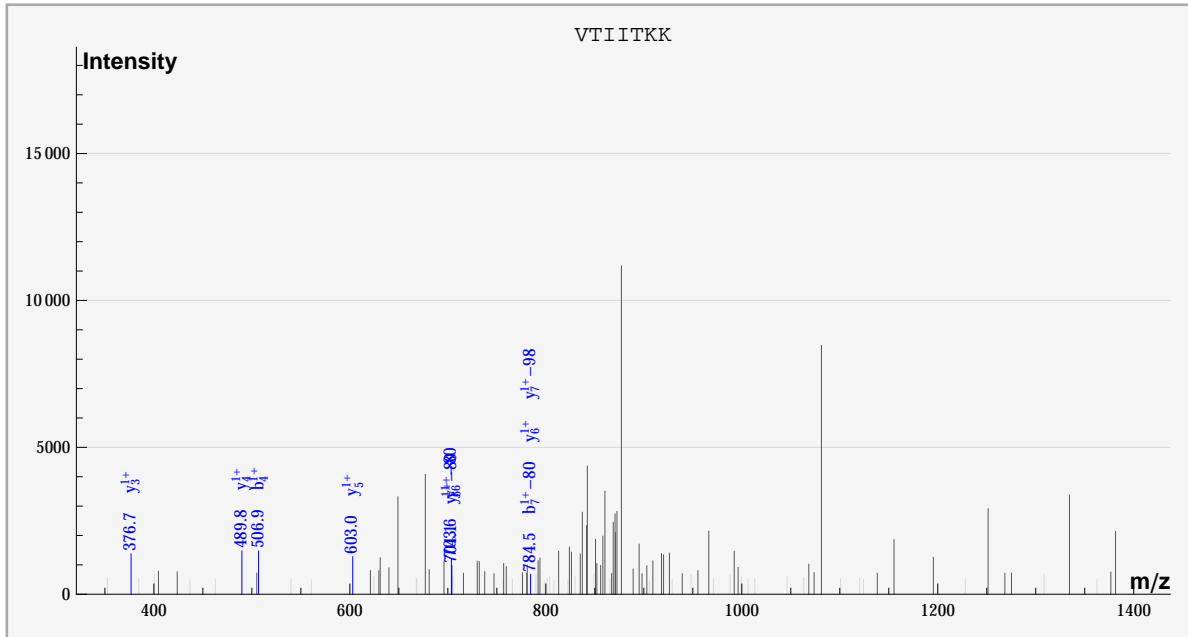

|   | # | b | b* | # | y | y* | P | P* |
|---|---|---|----|---|---|----|---|----|
| V | 1 |   |    |   |   |    |   | ✓  |
| T | 2 |   |    | 6 | ✓ | ✓  |   |    |
| I | 3 |   |    | 5 | ✓ |    |   |    |
| I | 4 | ✓ |    | 4 | ✓ |    |   |    |
| T | 5 |   |    | 3 | ✓ |    |   |    |
| K | 6 |   |    | 2 |   |    |   |    |
| K | 7 |   | ✓  | 1 |   |    |   |    |

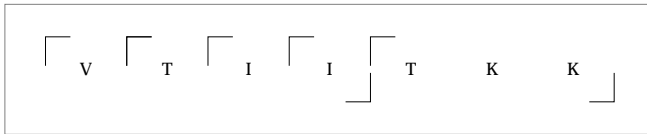

dbValid true VTIIKK PHOS(1) 1. 883. -0.494035 5.57414 100. ? 2880.  
 S\_Acido\_new%gi|68567016|gb|AAY79945.1| VTIIKK%::PHOS%:::%sample\_2%compd\_1488

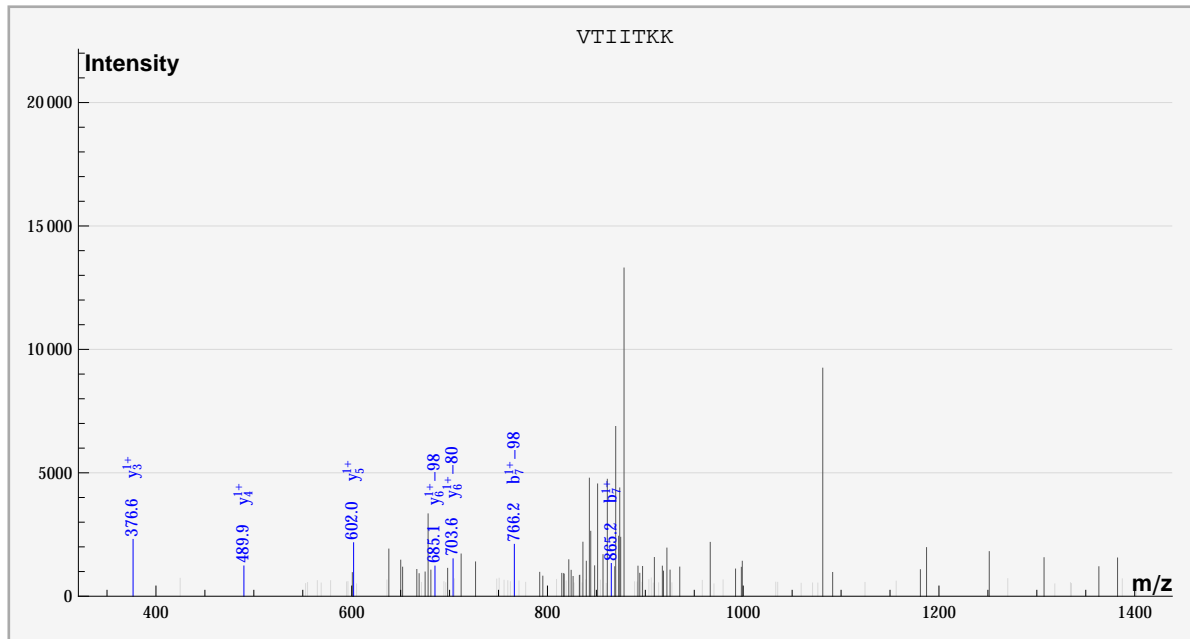

|   | # | b | b* | # | y | y* | P | P* |
|---|---|---|----|---|---|----|---|----|
| V | 1 |   |    |   |   |    |   |    |
| T | 2 |   |    | 6 |   | ✓  |   |    |
| I | 3 |   |    | 5 |   | ✓  |   |    |
| I | 4 |   |    | 4 |   | ✓  |   |    |
| T | 5 |   |    | 3 |   | ✓  |   |    |
| K | 6 |   |    | 2 |   |    |   |    |
| K | 7 | ✓ | ✓  | 1 |   |    |   |    |

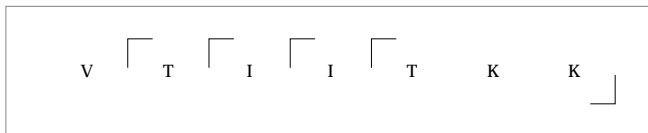

dbValid true YLEKIYDYKLVR PHOS(2) 2. 883. -1.08556 5.27982 100. ? 4518.  
 S\_Acido\_new%gi|68568037|gb|AA80966.1| YLEKIYDYKLVR%:PHOS:::PHOS:::sample\_2%compd\_2984

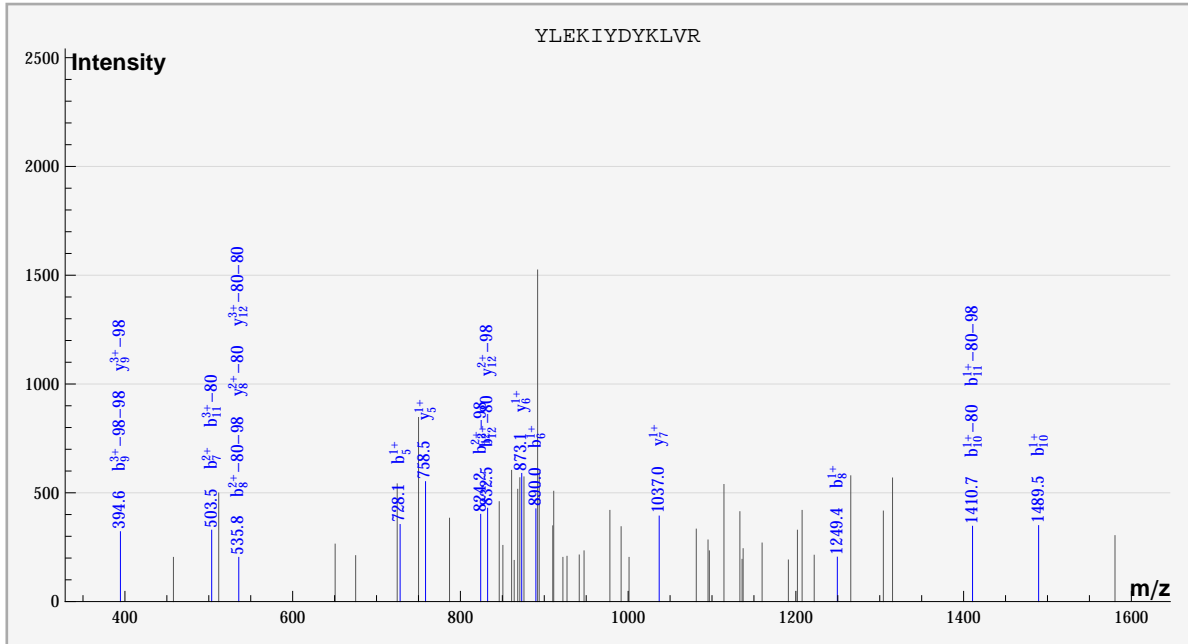

|   | #  | b | b* | #  | y | y* | P | P* |
|---|----|---|----|----|---|----|---|----|
| Y | 1  |   |    |    |   |    |   | ✓  |
| L | 2  |   |    | 11 |   |    |   |    |
| E | 3  |   |    | 10 |   |    |   |    |
| K | 4  |   |    | 9  |   | ✓  |   |    |
| I | 5  | ✓ |    | 8  |   | ✓  |   |    |
| Y | 6  | ✓ |    | 7  | ✓ |    |   |    |
| D | 7  | ✓ |    | 6  | ✓ |    |   |    |
| Y | 8  | ✓ | ✓  | 5  | ✓ |    |   |    |
| K | 9  |   | ✓  | 4  |   |    |   |    |
| L | 10 | ✓ | ✓  | 3  |   |    |   |    |
| V | 11 |   | ✓  | 2  |   |    |   |    |
| R | 12 |   | ✓  | 1  |   |    |   |    |

Y L E K I Y D Y K L V R

dbValid true RLVADTK PHOS(1) 1. 884. -1.55558 5.98841 100. ? 1812.  
 S\_Acido\_new%gi|68567190|gb|AAY80119.1| RLVADTK%:::PHOS::%sample\_3%cmpd\_458

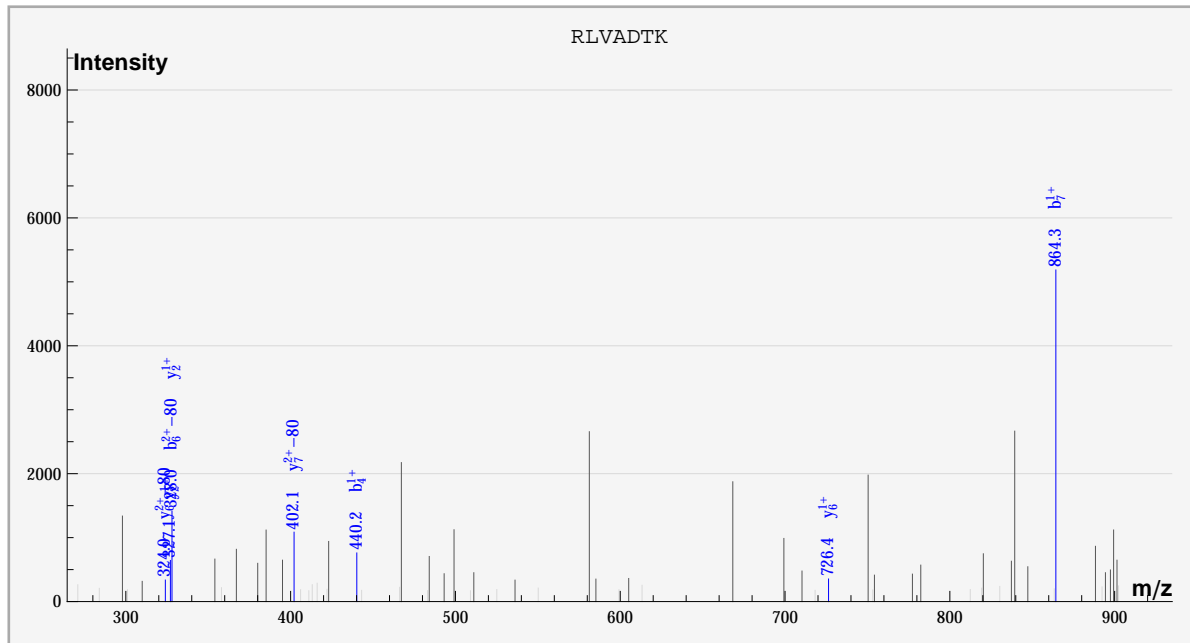

|   | # | b | b* | # | y | y* | P | P* |
|---|---|---|----|---|---|----|---|----|
| R | 1 |   |    |   |   |    |   | ✓  |
| L | 2 |   |    | 6 | ✓ | ✓  |   |    |
| V | 3 |   |    | 5 |   |    |   |    |
| A | 4 | ✓ |    | 4 |   |    |   |    |
| D | 5 |   |    | 3 |   |    |   |    |
| T | 6 |   | ✓  | 2 | ✓ |    |   |    |
| K | 7 | ✓ |    | 1 |   |    |   |    |

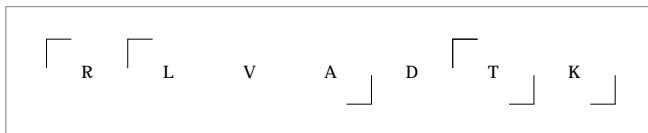

dbValid true RLVADTK PHOS(1) 1. 884. -1.55558 5.82083 100. ? 1818.

S\_Acido\_new%gi|68567190|gb|AAY80119.1| RLVADTK%:::PHOS::%sample\_1%cmpd\_492

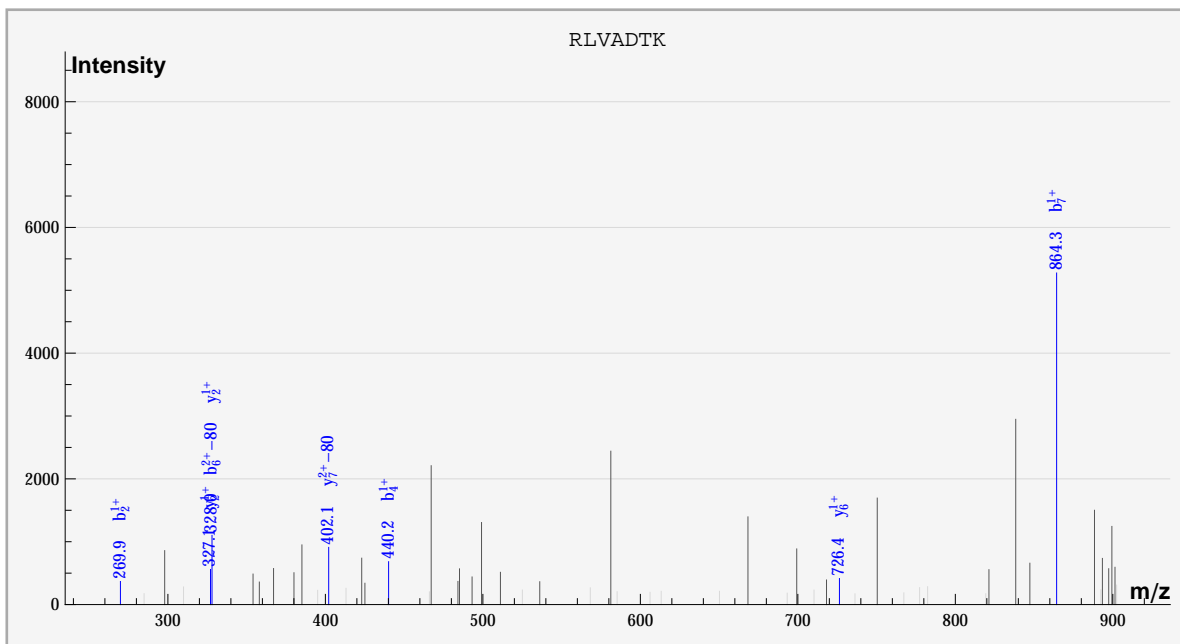

|   | # | b | b* | # | y | y* | P | P* |
|---|---|---|----|---|---|----|---|----|
| R | 1 |   |    |   |   |    |   | ✓  |
| L | 2 | ✓ |    | 6 | ✓ |    |   |    |
| V | 3 |   |    | 5 |   |    |   |    |
| A | 4 | ✓ |    | 4 |   |    |   |    |
| D | 5 |   |    | 3 |   |    |   |    |
| T | 6 |   | ✓  | 2 | ✓ |    |   |    |
| K | 7 | ✓ |    | 1 |   |    |   |    |

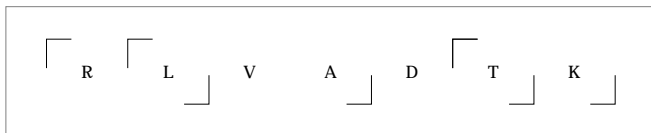

dbValid true RLVADTK PHOS(1) 1. 884. -1.55558 5.52996 100. ? 1824.  
 S\_Acido\_new%gi68567190|gb|AAY80119.1| RLVADTK%:::::PHOS::%sample\_3%compd\_468

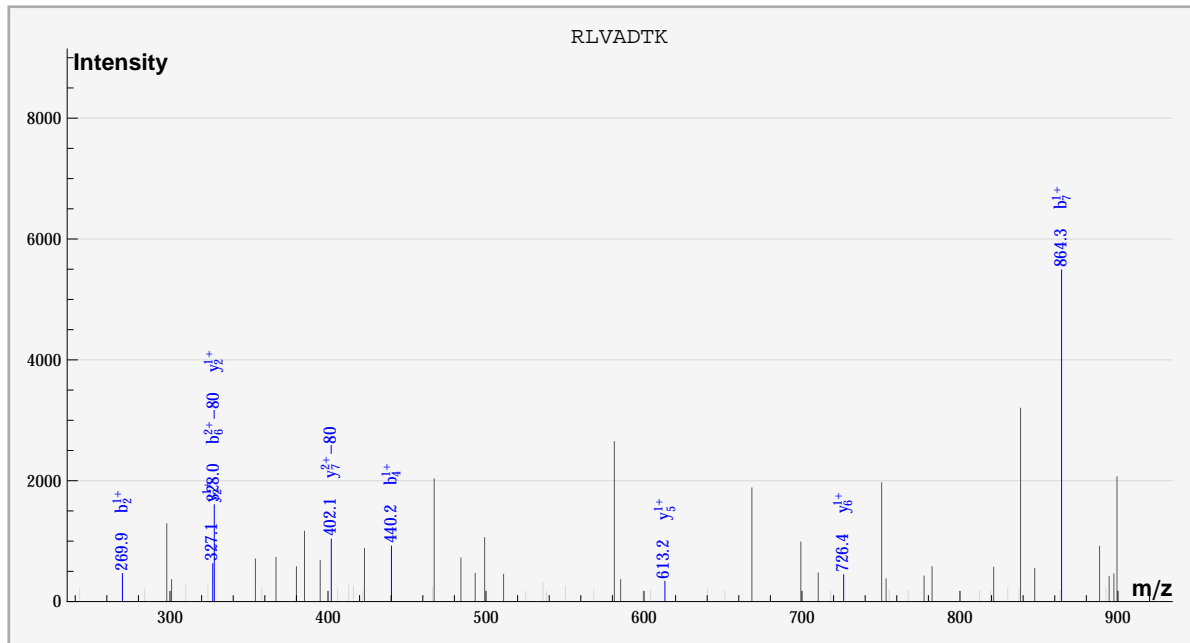

|   | # | b | b* | # | y | y* | P | P* |
|---|---|---|----|---|---|----|---|----|
| R | 1 |   |    |   |   |    |   | ✓  |
| L | 2 | ✓ |    | 6 | ✓ |    |   |    |
| V | 3 |   |    | 5 | ✓ |    |   |    |
| A | 4 | ✓ |    | 4 |   |    |   |    |
| D | 5 |   |    | 3 |   |    |   |    |
| T | 6 |   | ✓  | 2 | ✓ |    |   |    |
| K | 7 | ✓ |    | 1 |   |    |   |    |

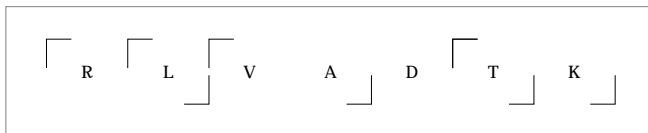

dbValid true RLVADTK PHOS(1) 1. 884. -1.55558 5.72664 100. ? 1830.

S\_Acido\_new%gi|68567190|gb|AAY80119.1| RLVADTK%:::PHOS::%sample\_1%cmpd\_503

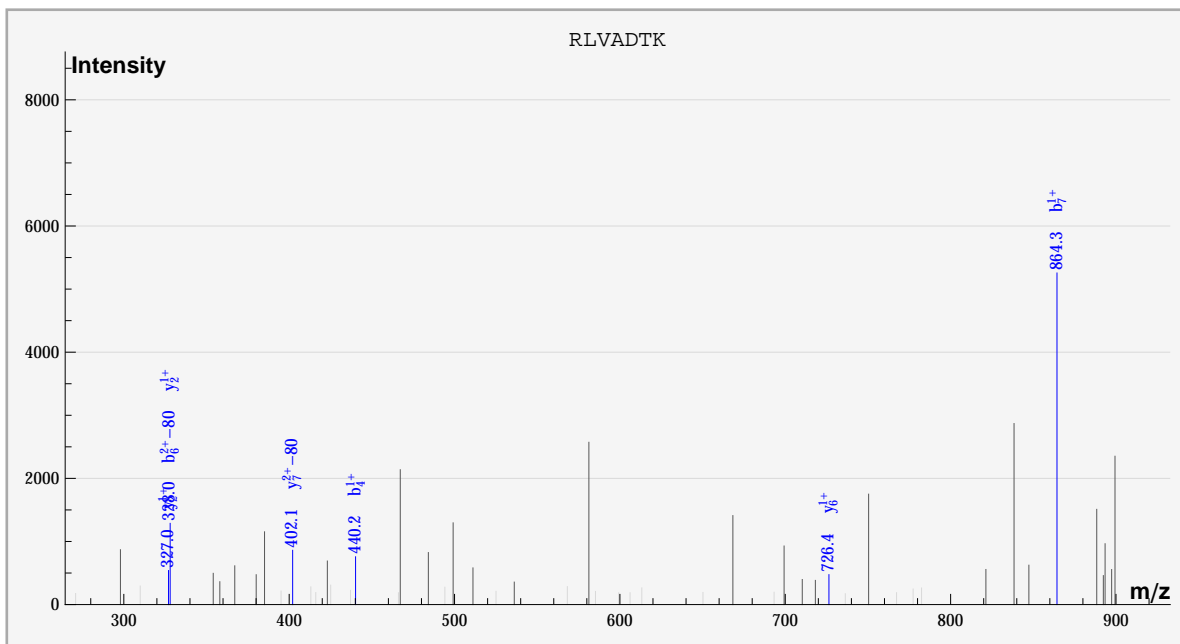

|   | # | b | b* | # | y | y* | P | P* |
|---|---|---|----|---|---|----|---|----|
| R | 1 |   |    |   |   |    |   | ✓  |
| L | 2 |   |    | 6 | ✓ |    |   |    |
| V | 3 |   |    | 5 |   |    |   |    |
| A | 4 | ✓ |    | 4 |   |    |   |    |
| D | 5 |   |    | 3 |   |    |   |    |
| T | 6 |   | ✓  | 2 | ✓ |    |   |    |
| K | 7 | ✓ |    | 1 |   |    |   |    |

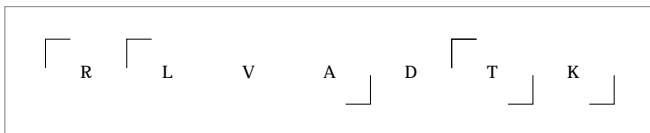

dbValid true RLVADTK PHOS(1) 1. 884. -1.55558 5.59515 100. ? 1842.  
 S\_Acido\_new%gi|68567190|gb|AAY80119.1| RLVADTK%:::::PHOS::%sample\_1%compd\_513

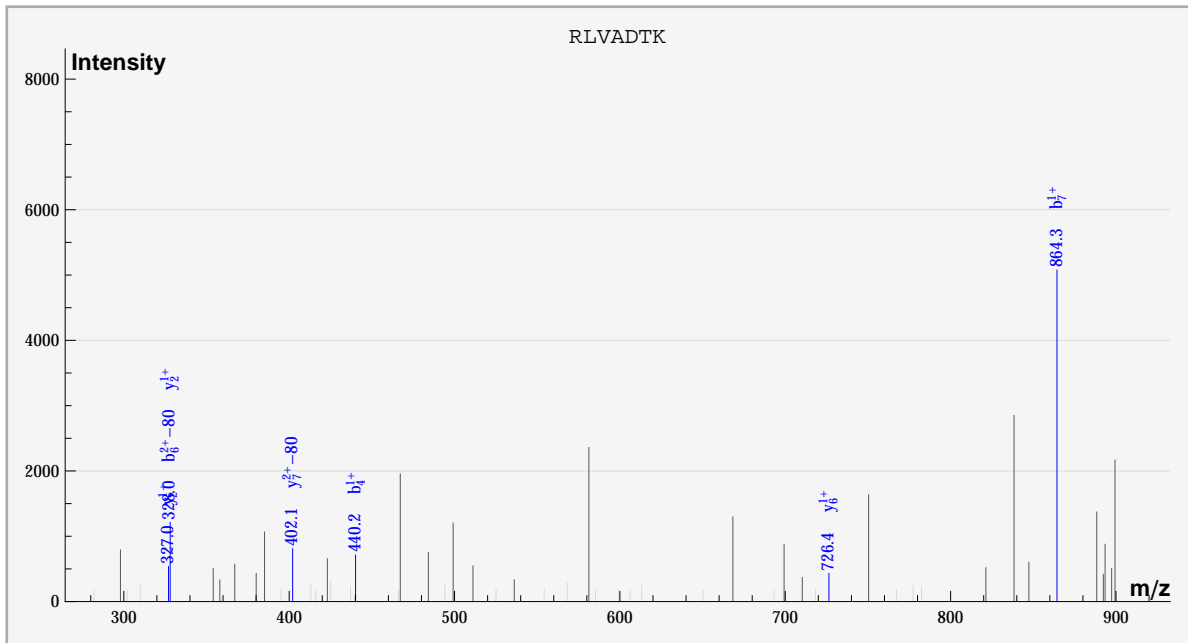

|   | # | b | b* | # | y | y* | P | P* |
|---|---|---|----|---|---|----|---|----|
| R | 1 |   |    |   |   |    |   | ✓  |
| L | 2 |   |    | 6 | ✓ |    |   |    |
| V | 3 |   |    | 5 |   |    |   |    |
| A | 4 | ✓ |    | 4 |   |    |   |    |
| D | 5 |   |    | 3 |   |    |   |    |
| T | 6 |   | ✓  | 2 | ✓ |    |   |    |
| K | 7 | ✓ |    | 1 |   |    |   |    |

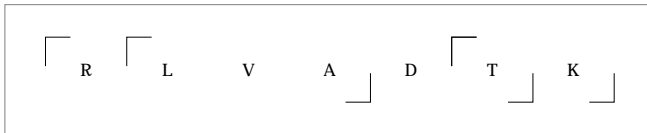



dbValid true RLVADTK PHOS(1) 1. 884. -1.55558 5.90147 100. ? 1848.  
 S\_Acido\_new%gi|68567190|gb|AAY80119.1| RLVADTK%:::PHOS::%sample\_3%compd\_489

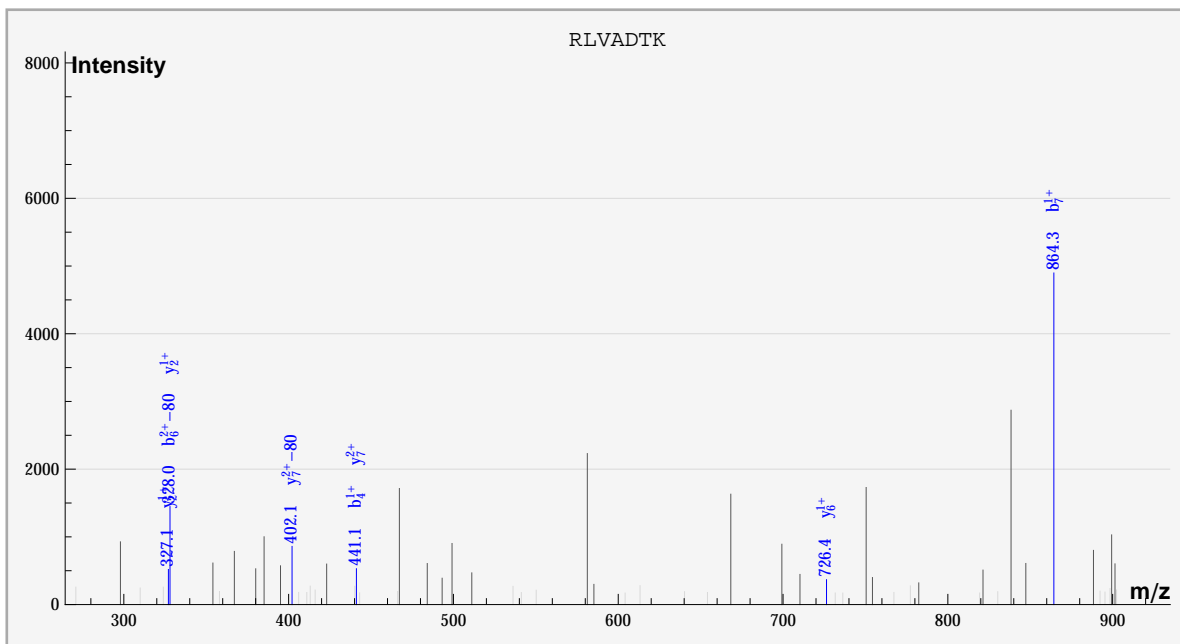

|   | # | b | b* | # | y | y* | P | P* |
|---|---|---|----|---|---|----|---|----|
| R | 1 |   |    |   |   |    | ✓ | ✓  |
| L | 2 |   |    | 6 | ✓ |    |   |    |
| V | 3 |   |    | 5 |   |    |   |    |
| A | 4 | ✓ |    | 4 |   |    |   |    |
| D | 5 |   |    | 3 |   |    |   |    |
| T | 6 |   | ✓  | 2 | ✓ |    |   |    |
| K | 7 | ✓ |    | 1 |   |    |   |    |

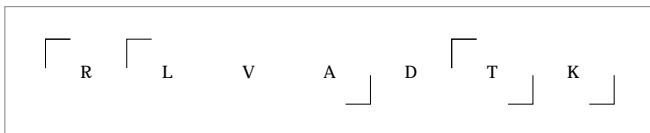

dbValid true RLVADTK PHOS(1) 1. 884. -1.55558 5.57463 100. ? 1854.  
 S\_Acido\_new%gi|68567190|gb|AAY80119.1| RLVADTK%:::::PHOS::%sample\_1%cmpd\_523

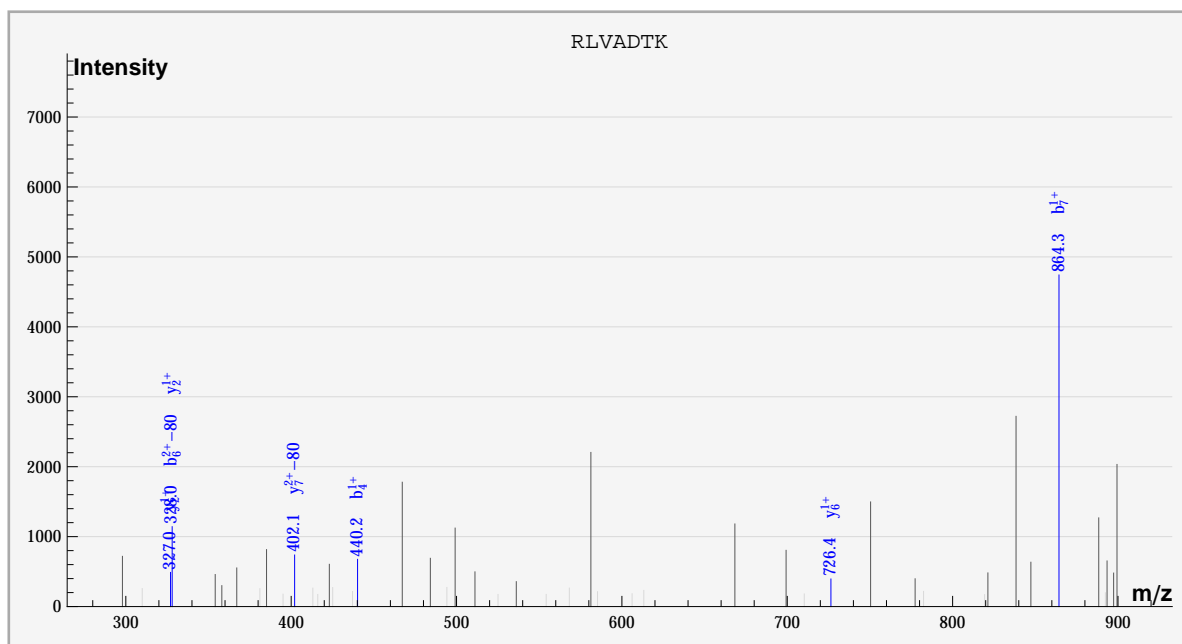

|   | # | b | b* | # | y | y* | P | P* |
|---|---|---|----|---|---|----|---|----|
| R | 1 |   |    |   |   |    |   | ✓  |
| L | 2 |   |    | 6 | ✓ |    |   |    |
| V | 3 |   |    | 5 |   |    |   |    |
| A | 4 | ✓ |    | 4 |   |    |   |    |
| D | 5 |   |    | 3 |   |    |   |    |
| T | 6 |   | ✓  | 2 | ✓ |    |   |    |
| K | 7 | ✓ |    | 1 |   |    |   |    |

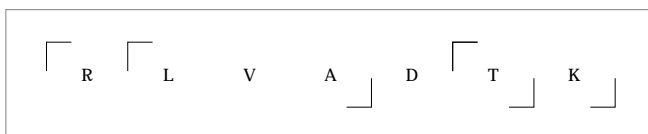

dbValid true RLVADTK PHOS(1) 1. 884. -1.55558 5.76536 100. ? 1866.

S\_Acido\_new%gi|68567190|gb|AAY80119.1| RLVADTK%:::::PHOS::%sample\_1%cmpd\_533

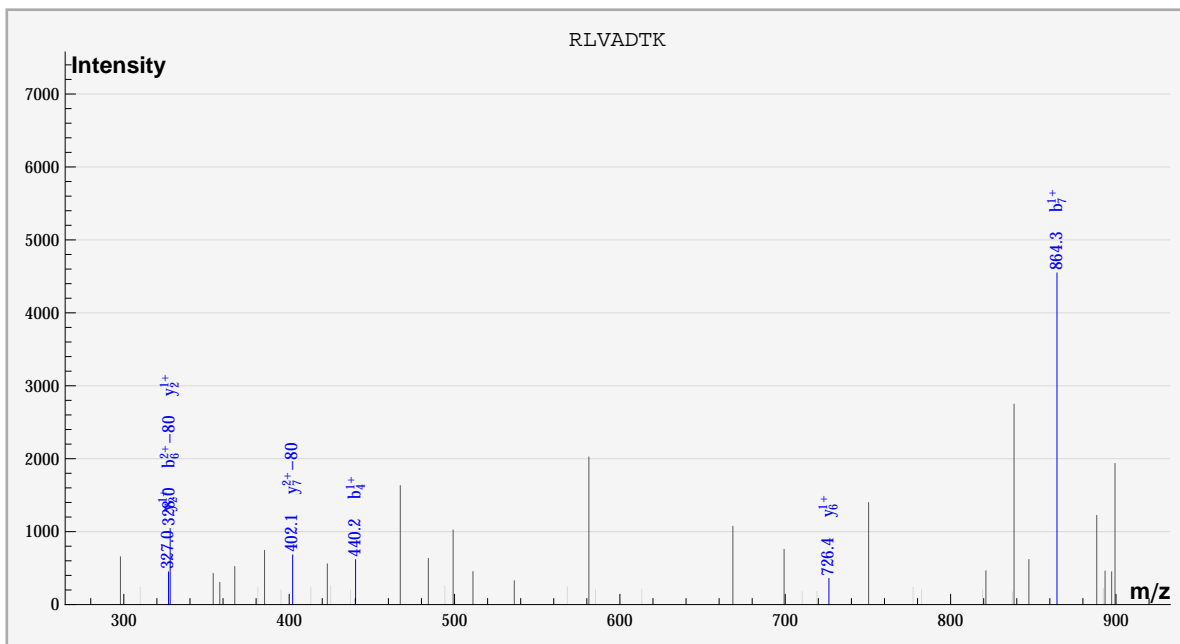

|   | # | b | b* | # | y | y* | P | P* |
|---|---|---|----|---|---|----|---|----|
| R | 1 |   |    |   |   |    |   | ✓  |
| L | 2 |   |    | 6 | ✓ |    |   |    |
| V | 3 |   |    | 5 |   |    |   |    |
| A | 4 | ✓ |    | 4 |   |    |   |    |
| D | 5 |   |    | 3 |   |    |   |    |
| T | 6 |   | ✓  | 2 | ✓ |    |   |    |
| K | 7 | ✓ |    | 1 |   |    |   |    |



dbValid true RLVADTK PHOS(1) 1. 884. -1.55558 5.41606 100. ? 1872.  
 S\_Acido\_new%gi|68567190|gb|AAY80119.1| RLVADTK%:::::PHOS::%sample\_3%cmpd\_509

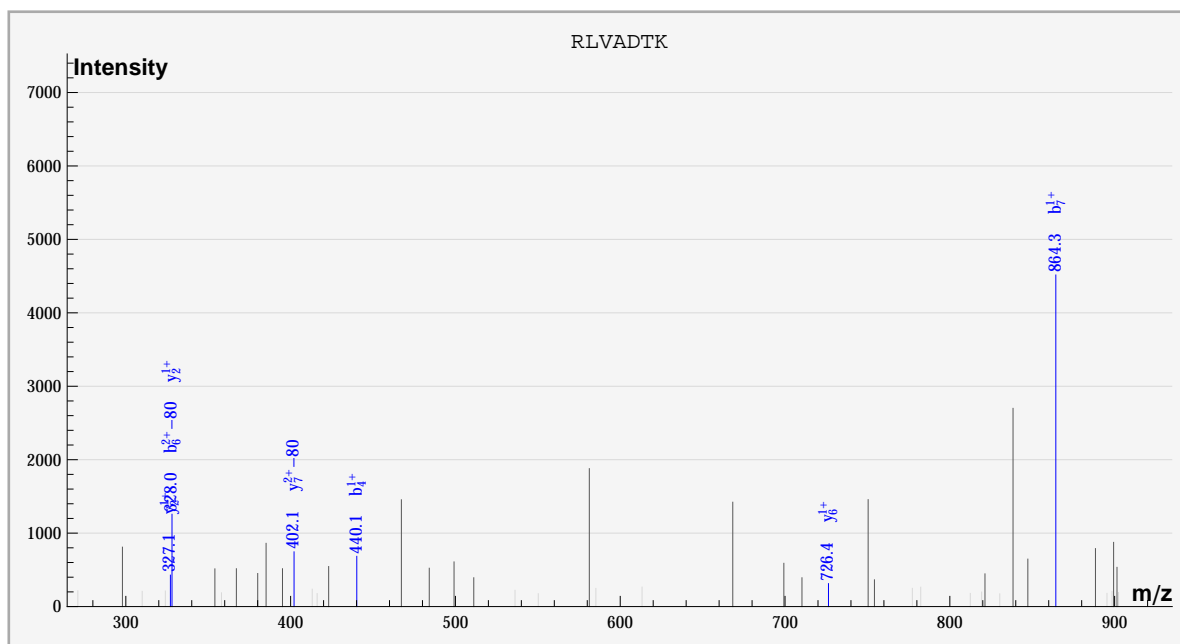

|   | # | b | b* | # | y | y* | P | P* |
|---|---|---|----|---|---|----|---|----|
| R | 1 |   |    |   |   |    |   | ✓  |
| L | 2 |   |    | 6 | ✓ |    |   |    |
| V | 3 |   |    | 5 |   |    |   |    |
| A | 4 | ✓ |    | 4 |   |    |   |    |
| D | 5 |   |    | 3 |   |    |   |    |
| T | 6 |   | ✓  | 2 | ✓ |    |   |    |
| K | 7 | ✓ |    | 1 |   |    |   |    |



dbValid true RLVADTK PHOS(1) 1. 884. -1.55558 5.31291 100. ? 1878.

S\_Acido\_new%gi|68567190|gb|AAY80119.1| RLVADTK%:::::PHOS::%sample\_1%cmpd\_543

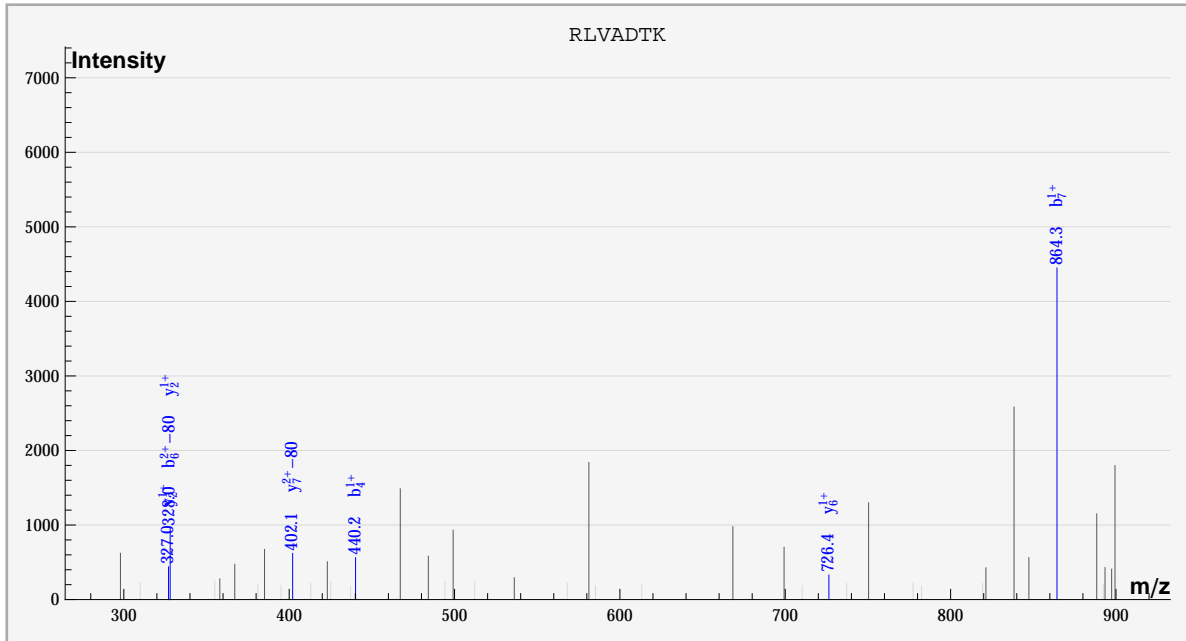

|   | # | b | b* | # | y | y* | P | P* |
|---|---|---|----|---|---|----|---|----|
| R | 1 |   |    |   |   |    |   | ✓  |
| L | 2 |   |    | 6 | ✓ |    |   |    |
| V | 3 |   |    | 5 |   |    |   |    |
| A | 4 | ✓ |    | 4 |   |    |   |    |
| D | 5 |   |    | 3 |   |    |   |    |
| T | 6 |   | ✓  | 2 | ✓ |    |   |    |
| K | 7 | ✓ |    | 1 |   |    |   |    |



dbValid true RLVADTK PHOS(1) 1. 884. -1.55558 5.69865 100. ? 1884.

S\_Acido\_new%gi|68567190|gb|AAY80119.1| RLVADTK%:::PHOS::%sample\_3%cmpd\_519

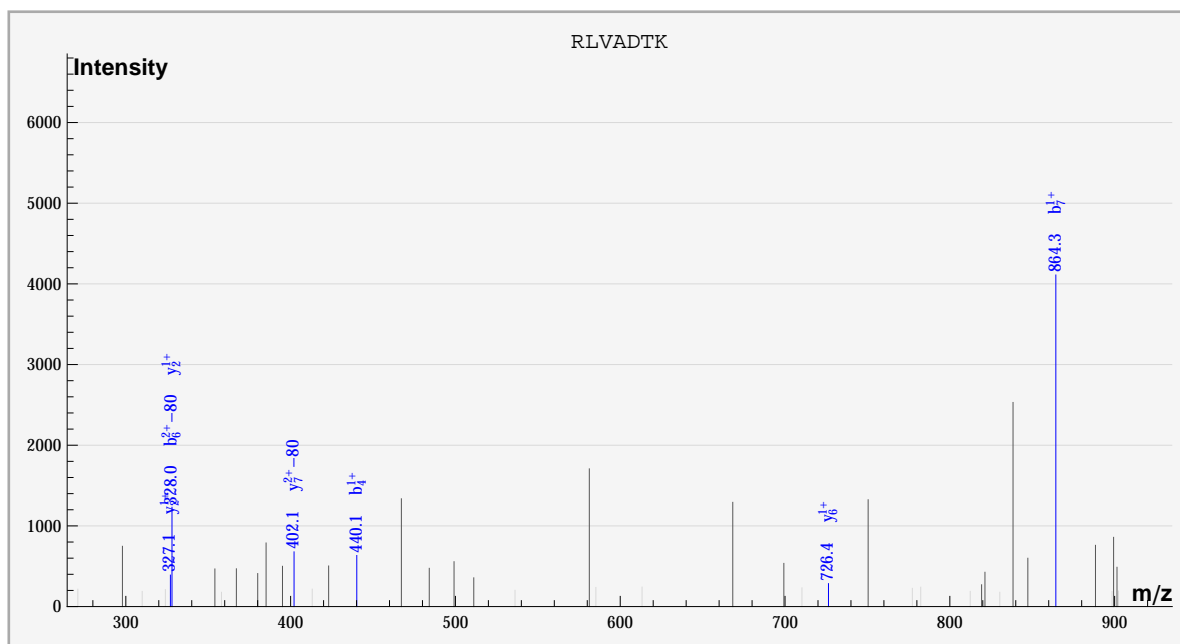

|   | # | b | b* | # | y | y* | P | P* |
|---|---|---|----|---|---|----|---|----|
| R | 1 |   |    |   |   |    |   | ✓  |
| L | 2 |   |    | 6 | ✓ |    |   |    |
| V | 3 |   |    | 5 |   |    |   |    |
| A | 4 | ✓ |    | 4 |   |    |   |    |
| D | 5 |   |    | 3 |   |    |   |    |
| T | 6 |   | ✓  | 2 | ✓ |    |   |    |
| K | 7 | ✓ |    | 1 |   |    |   |    |



dbValid true RLVADTK PHOS(1) 1. 884. -1.55558 5.61929 100. ? 1890.  
 S\_Acido\_new%gi|68567190|gb|AAY80119.1| RLVADTK%:::PHOS::%sample\_1%cmpd\_554

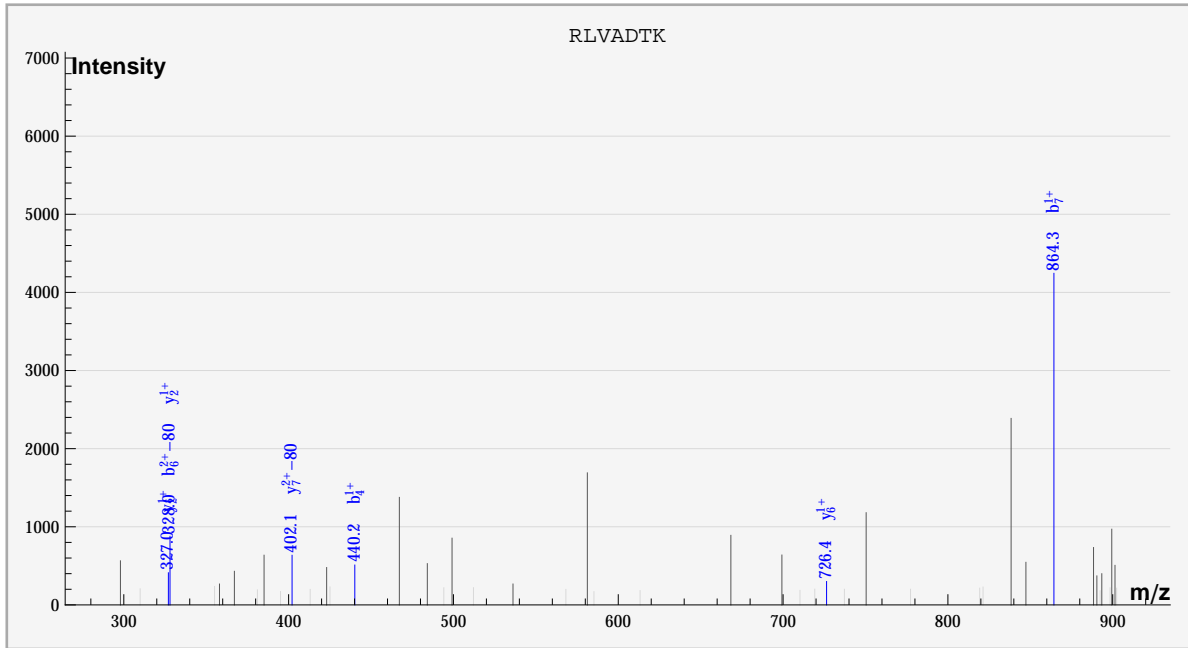

|   | # | b | b* | # | y | y* | P | P* |
|---|---|---|----|---|---|----|---|----|
| R | 1 |   |    |   |   |    |   | ✓  |
| L | 2 |   |    | 6 | ✓ |    |   |    |
| V | 3 |   |    | 5 |   |    |   |    |
| A | 4 | ✓ |    | 4 |   |    |   |    |
| D | 5 |   |    | 3 |   |    |   |    |
| T | 6 |   | ✓  | 2 | ✓ |    |   |    |
| K | 7 | ✓ |    | 1 |   |    |   |    |

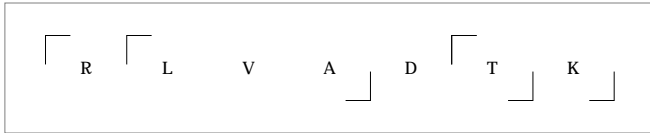

dbValid true RLVADTK PHOS(1) 1. 884. -1.55558 5.62623 100. ? 1896.  
 S\_Acido\_new%gi|68567190|gb|AAY80119.1| RLVADTK%:::::PHOS::%sample\_3%cmpd\_529

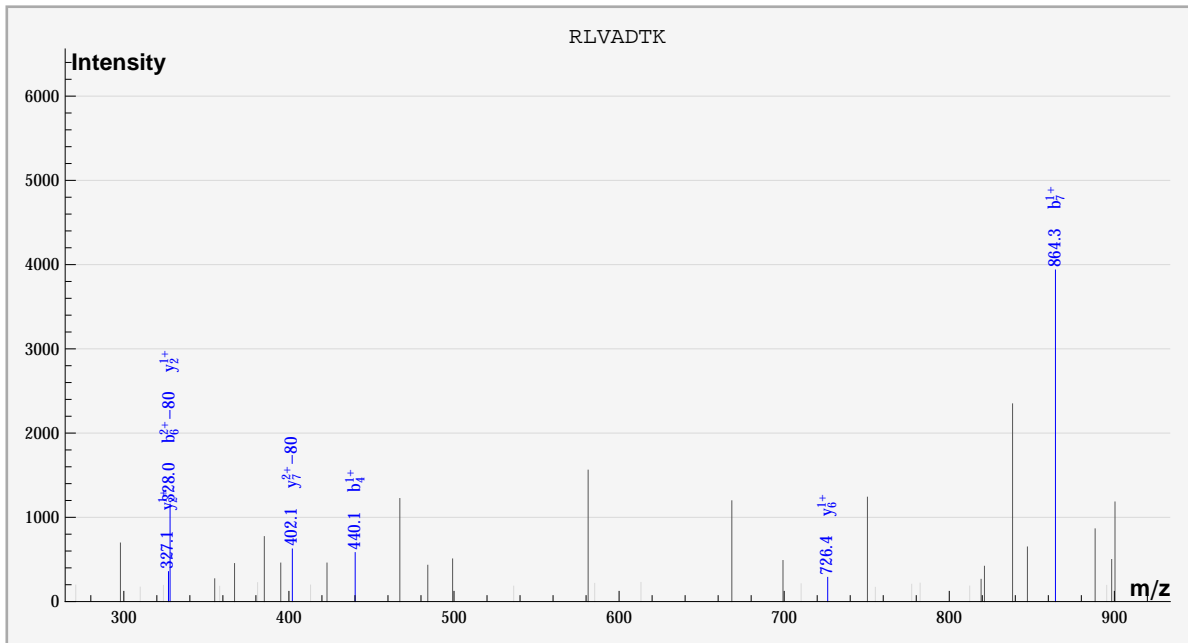

|   | # | b | b* | # | y | y* | P | P* |
|---|---|---|----|---|---|----|---|----|
| R | 1 |   |    |   |   |    |   | ✓  |
| L | 2 |   |    | 6 | ✓ |    |   |    |
| V | 3 |   |    | 5 |   |    |   |    |
| A | 4 | ✓ |    | 4 |   |    |   |    |
| D | 5 |   |    | 3 |   |    |   |    |
| T | 6 |   | ✓  | 2 | ✓ |    |   |    |
| K | 7 | ✓ |    | 1 |   |    |   |    |





dbValid true RLVADTK PHOS(1) 1. 884. -1.55558 5.94239 100. ? 1908.  
 S\_Acido\_new%gi|68567190|gb|AAY80119.1| RLVADTK%:::::PHOS::%sample\_3%cmpd\_539

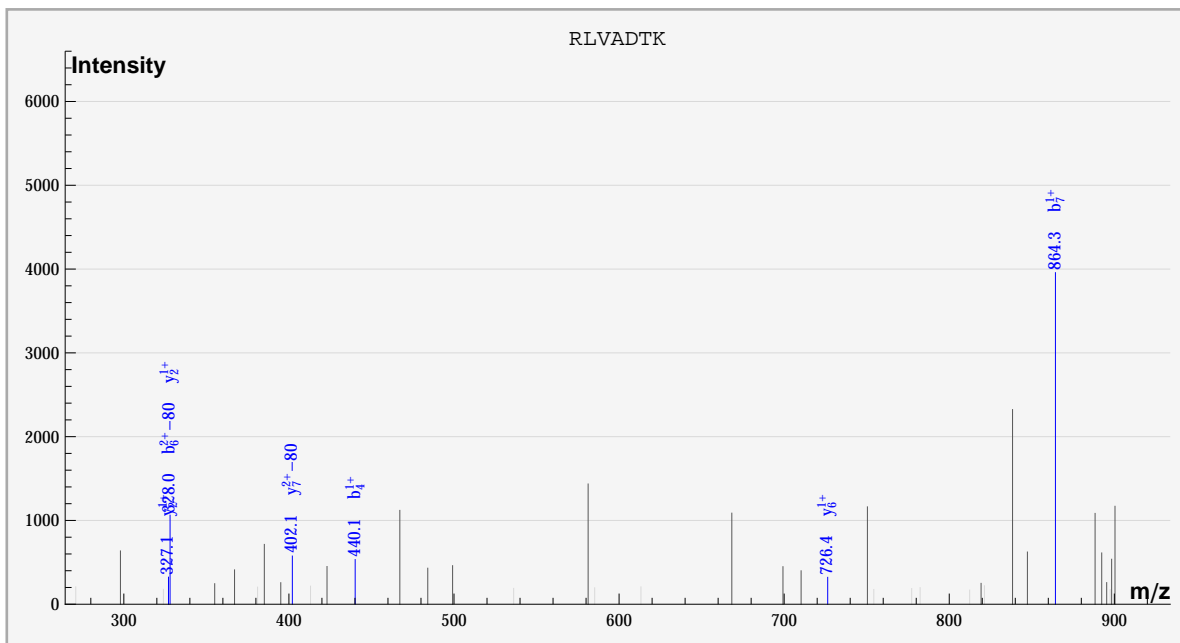

|   | # | b | b* | # | y | y* | P | P* |
|---|---|---|----|---|---|----|---|----|
| R | 1 |   |    |   |   |    |   | ✓  |
| L | 2 |   |    | 6 | ✓ |    |   |    |
| V | 3 |   |    | 5 |   |    |   |    |
| A | 4 | ✓ |    | 4 |   |    |   |    |
| D | 5 |   |    | 3 |   |    |   |    |
| T | 6 |   | ✓  | 2 | ✓ |    |   |    |
| K | 7 | ✓ |    | 1 |   |    |   |    |

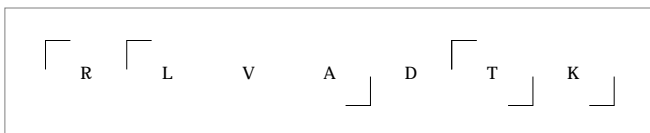

dbValid true RLVADTK PHOS(1) 1. 884. -1.55558 5.37497 100. ? 1920.  
 S\_Acido\_new%gi68567190|gb|AAY80119.1| RLVADTK%:::::PHOS::%sample\_3%compd\_549

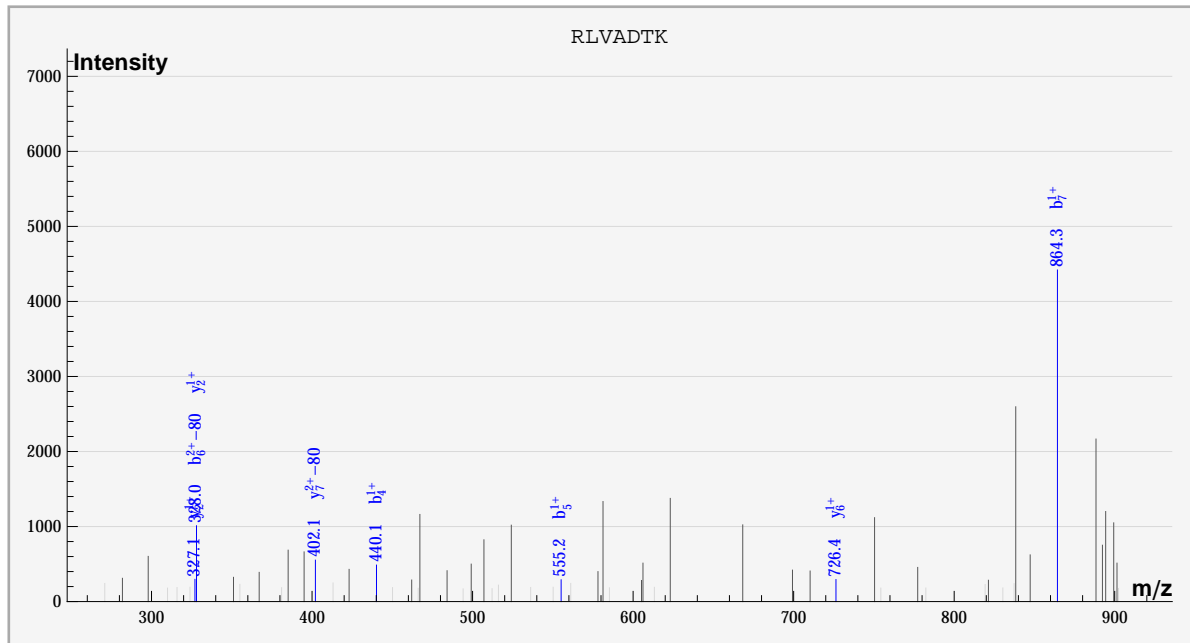

|   | # | b | b* | # | y | y* | P | P* |
|---|---|---|----|---|---|----|---|----|
| R | 1 |   |    |   |   |    |   | ✓  |
| L | 2 |   |    | 6 | ✓ |    |   |    |
| V | 3 |   |    | 5 |   |    |   |    |
| A | 4 | ✓ |    | 4 |   |    |   |    |
| D | 5 | ✓ |    | 3 |   |    |   |    |
| T | 6 |   | ✓  | 2 | ✓ |    |   |    |
| K | 7 | ✓ |    | 1 |   |    |   |    |

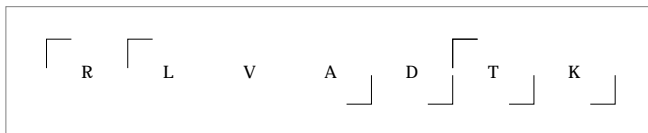

dbValid true NNYTYK PHOS(1) 1. 884. -1.66069 5.37189 100. ? 3312.

S\_Acido\_new%gi|68567034|gb|AAY79963.1| NNYTYK%:::PHOS:::sample\_3%compd\_1721

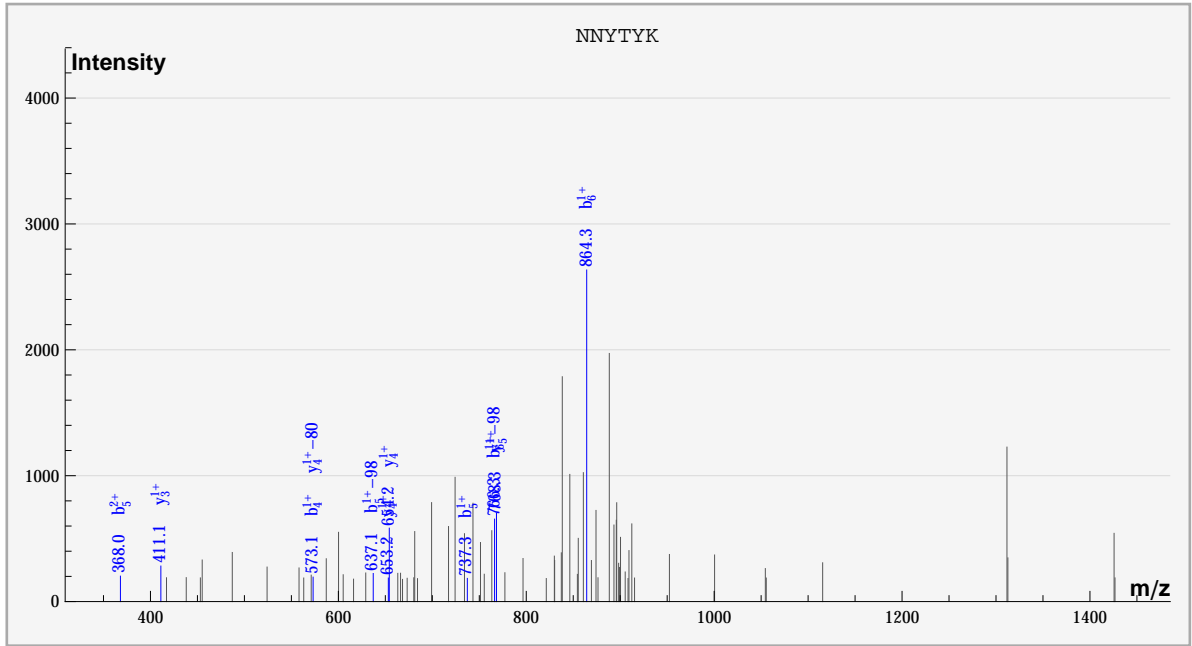

|   | # | b | b* | # | y | y* | P | P* |
|---|---|---|----|---|---|----|---|----|
| N | 1 |   |    |   |   |    |   |    |
| N | 2 |   |    | 5 | ✓ |    |   |    |
| Y | 3 |   |    | 4 | ✓ | ✓  |   |    |
| T | 4 | ✓ |    | 3 | ✓ |    |   |    |
| Y | 5 | ✓ | ✓  | 2 |   |    |   |    |
| K | 6 | ✓ | ✓  | 1 |   |    |   |    |

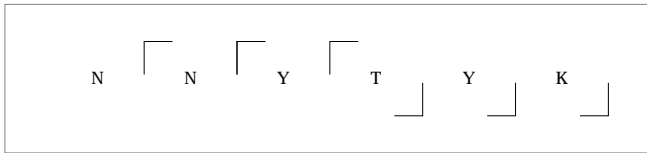

dbValid true RSKVWK PHOS(1) 1. 884. -0.545065 5.20947 100. ? 4434.  
 S\_Acido\_new%gi|68567471|gb|AAY80400.1| RSKVWK%::PHOS:::%sample\_1%compd\_2909

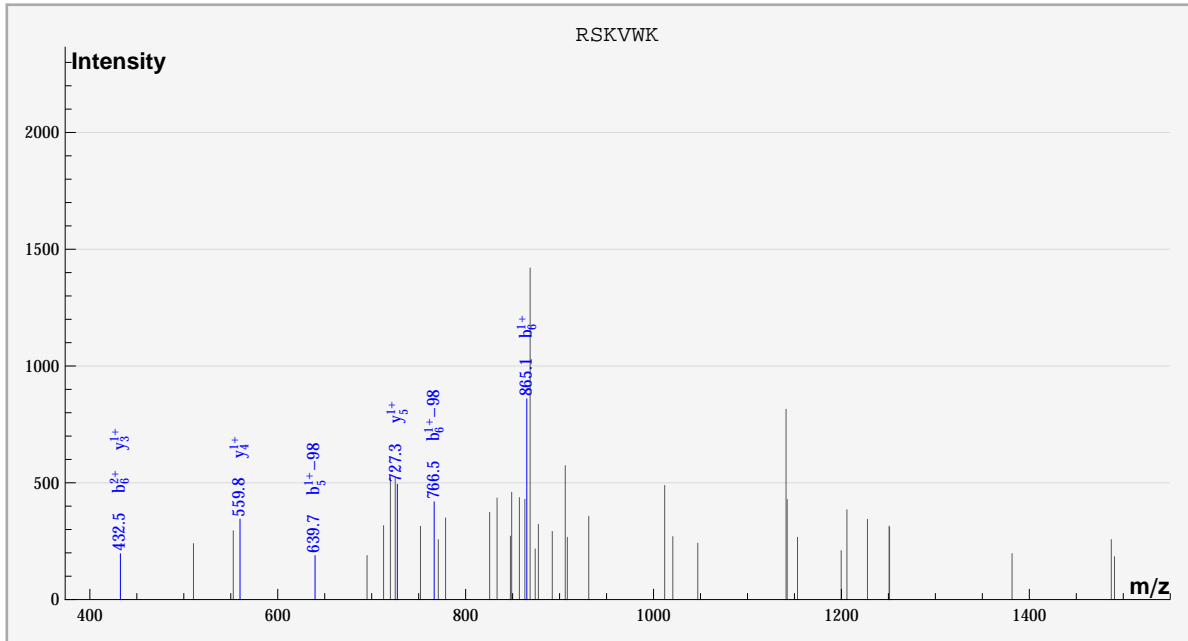

|   | # | b | b* | # | y | y* | P | P* |
|---|---|---|----|---|---|----|---|----|
| R | 1 |   |    |   |   |    |   |    |
| S | 2 |   |    | 5 | ✓ |    |   |    |
| K | 3 |   |    | 4 | ✓ |    |   |    |
| V | 4 |   |    | 3 | ✓ |    |   |    |
| W | 5 | ✓ | ✓  | 2 |   |    |   |    |
| K | 6 | ✓ | ✓  | 1 |   |    |   |    |

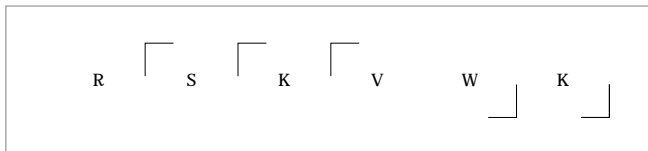

dbValid true KTTESTH PHOS(1) 1. 885. -1.64432 5.1849 100. ? 2040.

S\_Acido\_new%gi|68566626|gb|AAY79555.1| KTTESTH%:::PHOS::%sample\_3%compd\_652

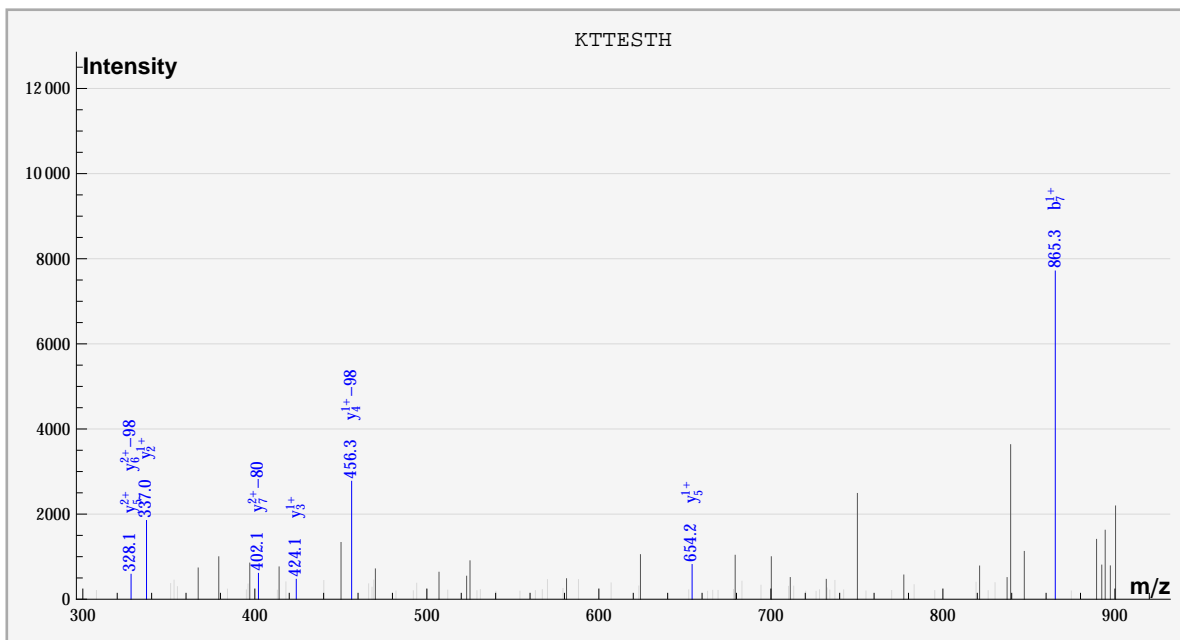

|   | # | b | b* | # | y | y* | P | P* |
|---|---|---|----|---|---|----|---|----|
| K | 1 |   |    |   |   |    |   | ✓  |
| T | 2 |   |    | 6 |   | ✓  |   |    |
| T | 3 |   |    | 5 | ✓ |    |   |    |
| E | 4 |   |    | 4 |   | ✓  |   |    |
| S | 5 |   |    | 3 | ✓ |    |   |    |
| T | 6 |   |    | 2 | ✓ |    |   |    |
| H | 7 | ✓ |    | 1 |   |    |   |    |

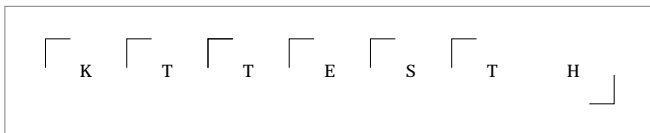

dbValid true KTTESTH PHOS(1) 1. 885. -1.64432 5.52263 100. ? 2052.  
 S\_Acido\_new%gi|68566626|gb|AAY79555.1| KTTESTH%:::PHOS::%sample\_3%compd\_663

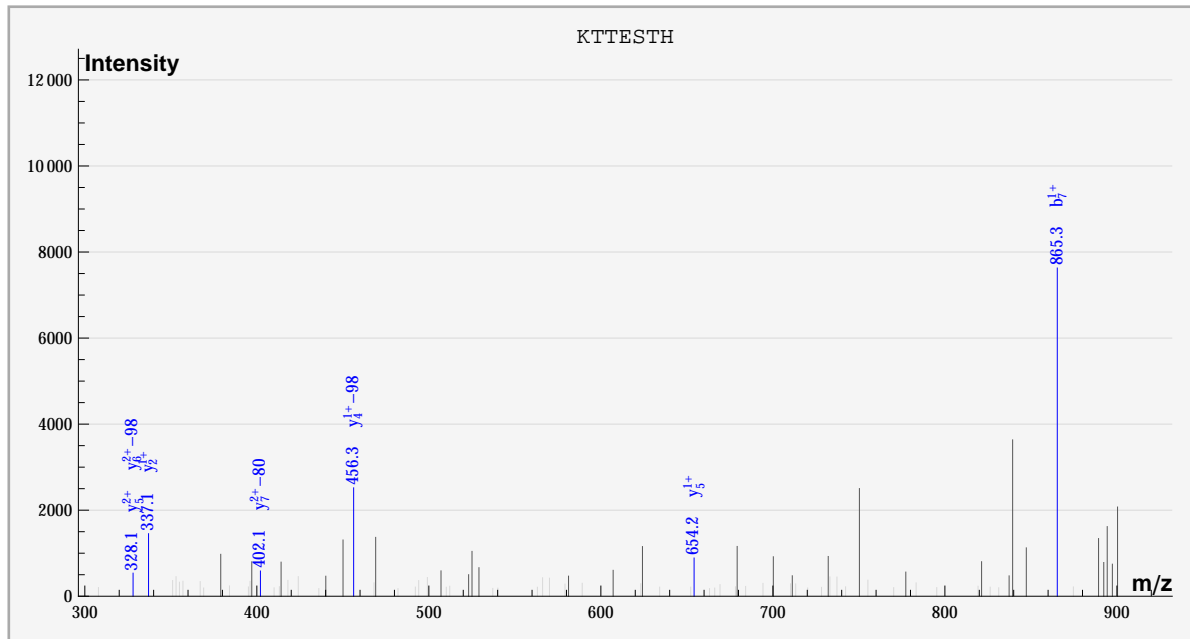

|   | # | b | b* | # | y | y* | P | P* |
|---|---|---|----|---|---|----|---|----|
| K | 1 |   |    |   |   |    |   | ✓  |
| T | 2 |   |    | 6 |   | ✓  |   |    |
| T | 3 |   |    | 5 | ✓ |    |   |    |
| E | 4 |   |    | 4 |   | ✓  |   |    |
| S | 5 |   |    | 3 |   |    |   |    |
| T | 6 |   |    | 2 | ✓ |    |   |    |
| H | 7 | ✓ |    | 1 |   |    |   |    |

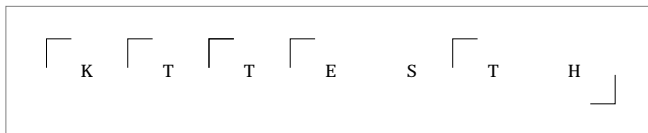

dbValid true KTTESTH PHOS(1) 1. 885. -1.64432 5.14269 100. ? 2076.

S\_Acido\_new%gi|68566626|gb|AAY79555.1| KTTESTH%:::PHOS::%sample\_3%compd\_684

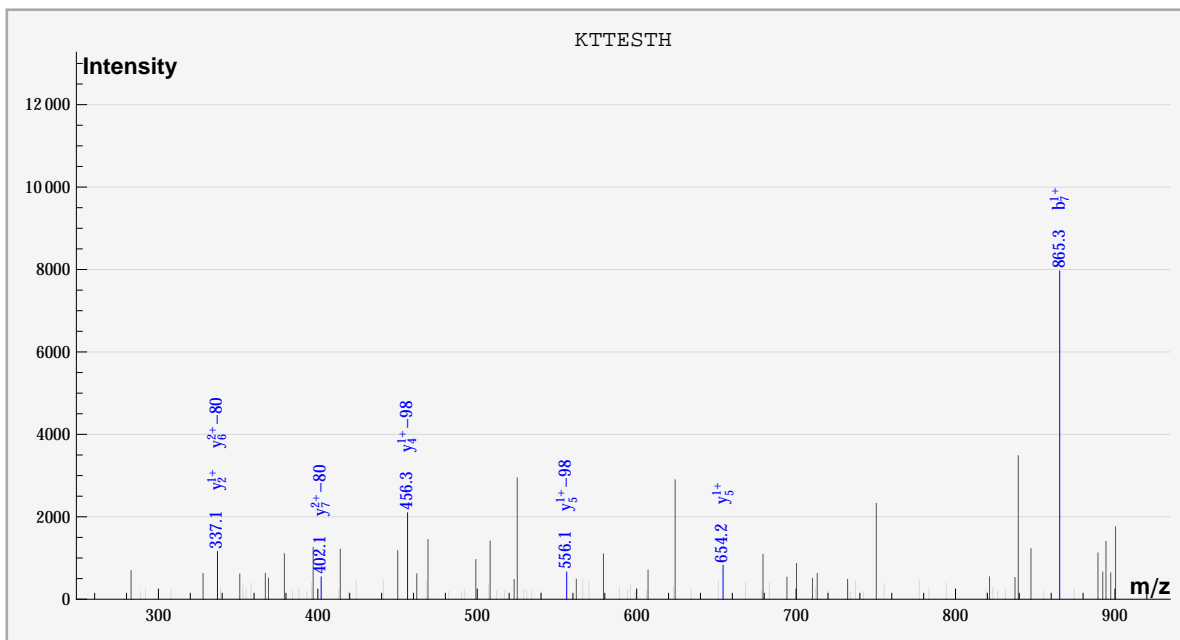

|   | # | b | b* | # | y | y* | P | P* |
|---|---|---|----|---|---|----|---|----|
| K | 1 |   |    |   |   |    |   | ✓  |
| T | 2 |   |    | 6 |   | ✓  |   |    |
| T | 3 |   |    | 5 | ✓ | ✓  |   |    |
| E | 4 |   |    | 4 |   | ✓  |   |    |
| S | 5 |   |    | 3 |   |    |   |    |
| T | 6 |   |    | 2 | ✓ |    |   |    |
| H | 7 | ✓ |    | 1 |   |    |   |    |

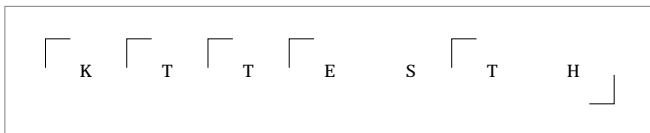

dbValid true LTKLNSK PHOS(1) 1. 885. -1.53517 5.65587 100. ? 2166.  
 S\_Acido\_new%gi|68568670|gb|AAY81599.1| LTKLNSK%.....PHOS::%sample\_2%cmpd\_835

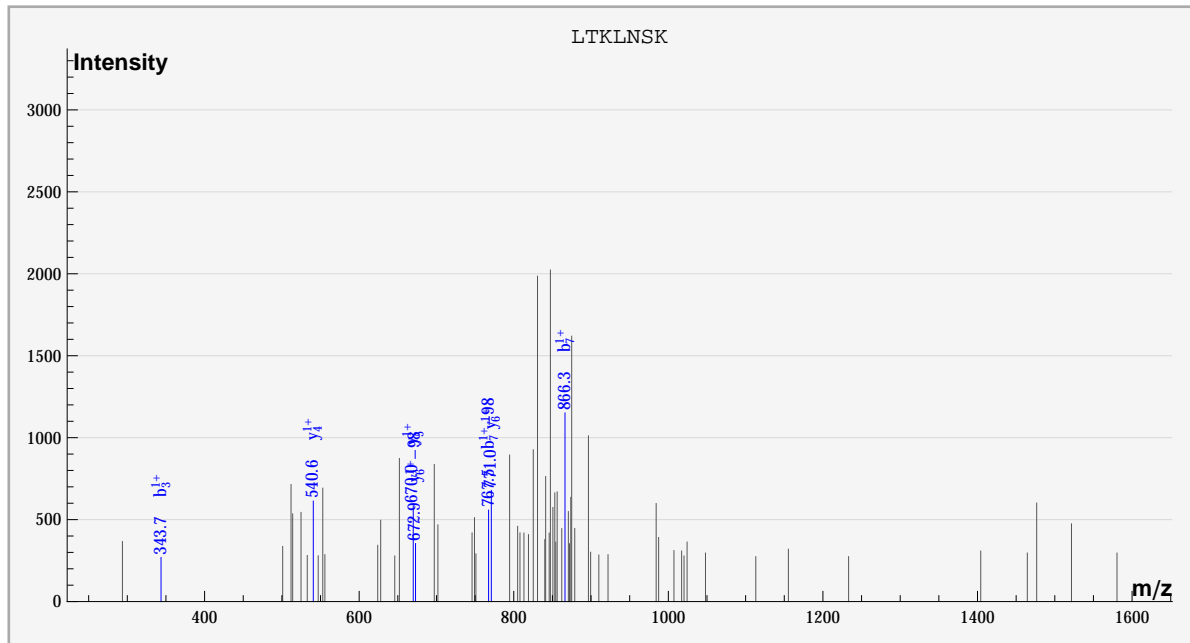

|   | # | b | b* | # | y | y* | P | P* |
|---|---|---|----|---|---|----|---|----|
| L | 1 |   |    |   |   |    |   |    |
| T | 2 |   |    | 6 | ✓ | ✓  |   |    |
| K | 3 | ✓ |    | 5 | ✓ |    |   |    |
| L | 4 |   |    | 4 | ✓ |    |   |    |
| N | 5 |   |    | 3 |   |    |   |    |
| S | 6 |   |    | 2 |   |    |   |    |
| K | 7 | ✓ | ✓  | 1 |   |    |   |    |

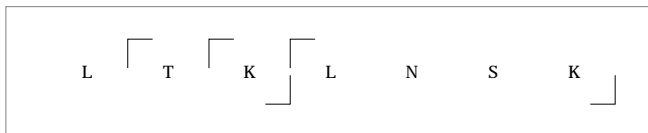



dbValid true KTTESTH PHOS(1) 1. 885. -1.64432 5.37859 100. ? 2532.  
 S\_Acido\_new%gi|68566626|gb|AAY79555.1| KTTESTH%::::PHOS:::sample\_1%compd\_1098

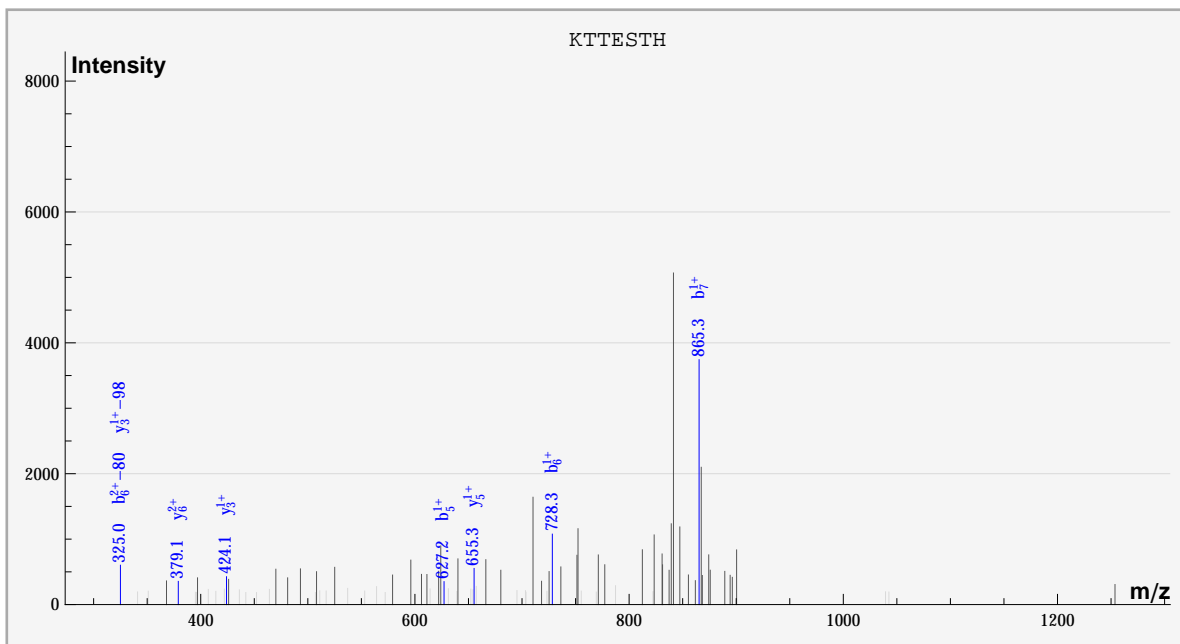

|   | # | b | b* | # | y | y* | P | P* |
|---|---|---|----|---|---|----|---|----|
| K | 1 |   |    |   |   |    |   |    |
| T | 2 |   |    | 6 | ✓ |    |   |    |
| T | 3 |   |    | 5 | ✓ |    |   |    |
| E | 4 |   |    | 4 |   |    |   |    |
| S | 5 | ✓ |    | 3 | ✓ | ✓  |   |    |
| T | 6 | ✓ | ✓  | 2 |   |    |   |    |
| H | 7 | ✓ |    | 1 |   |    |   |    |

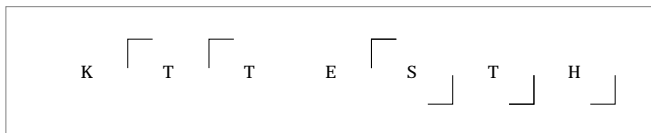

dbValid true KTTESTH PHOS(1) 1. 885. -1.64432 5.16106 100. ? 2538.  
 S\_Acido\_new%gi|68566626|gb|AAY79555.1| KTTESTH%::::PHOS:::sample\_3%cmpd\_1074

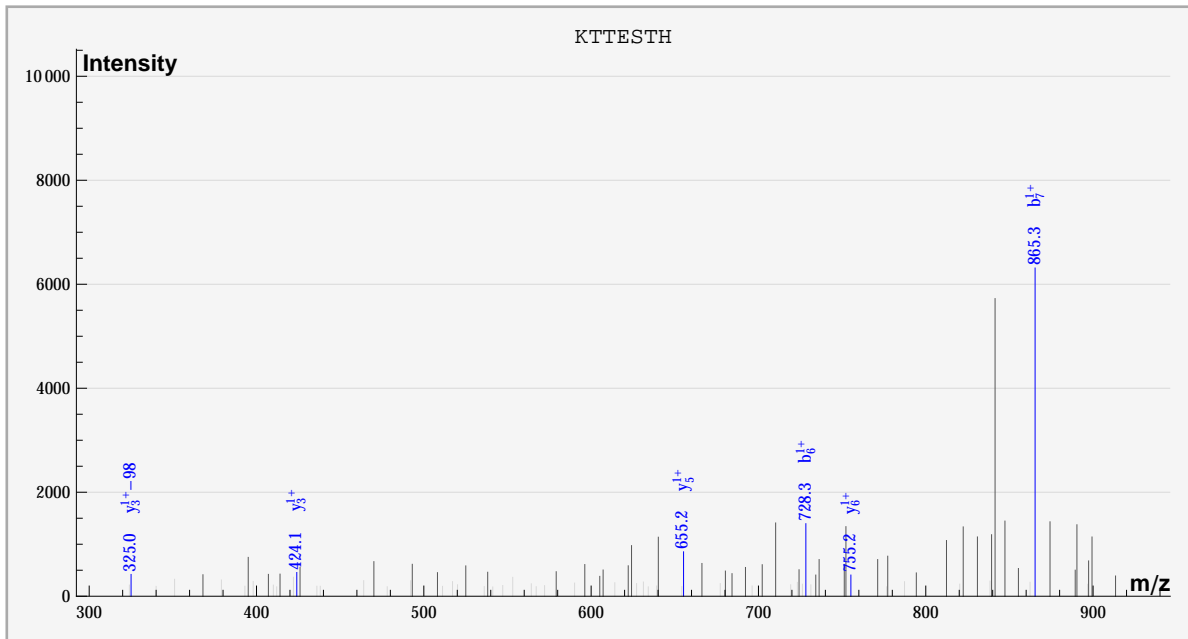

|   | # | b | b* | # | y | y* | P | P* |
|---|---|---|----|---|---|----|---|----|
| K | 1 |   |    |   |   |    |   |    |
| T | 2 |   |    | 6 | ✓ |    |   |    |
| T | 3 |   |    | 5 | ✓ |    |   |    |
| E | 4 |   |    | 4 |   |    |   |    |
| S | 5 |   |    | 3 | ✓ | ✓  |   |    |
| T | 6 | ✓ |    | 2 |   |    |   |    |
| H | 7 | ✓ |    | 1 |   |    |   |    |

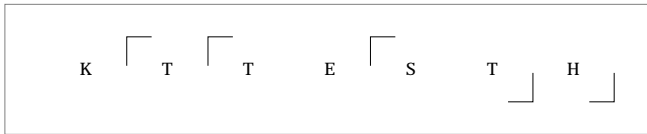

dbValid true KTTESTH PHOS(1) 1. 885. -1.64432 5.29323 100. ? 2544.

S\_Acido\_new%gi68566626|gb|AAY79555.1| KTTESTH%::::PHOS:::sample\_1%compd\_1108

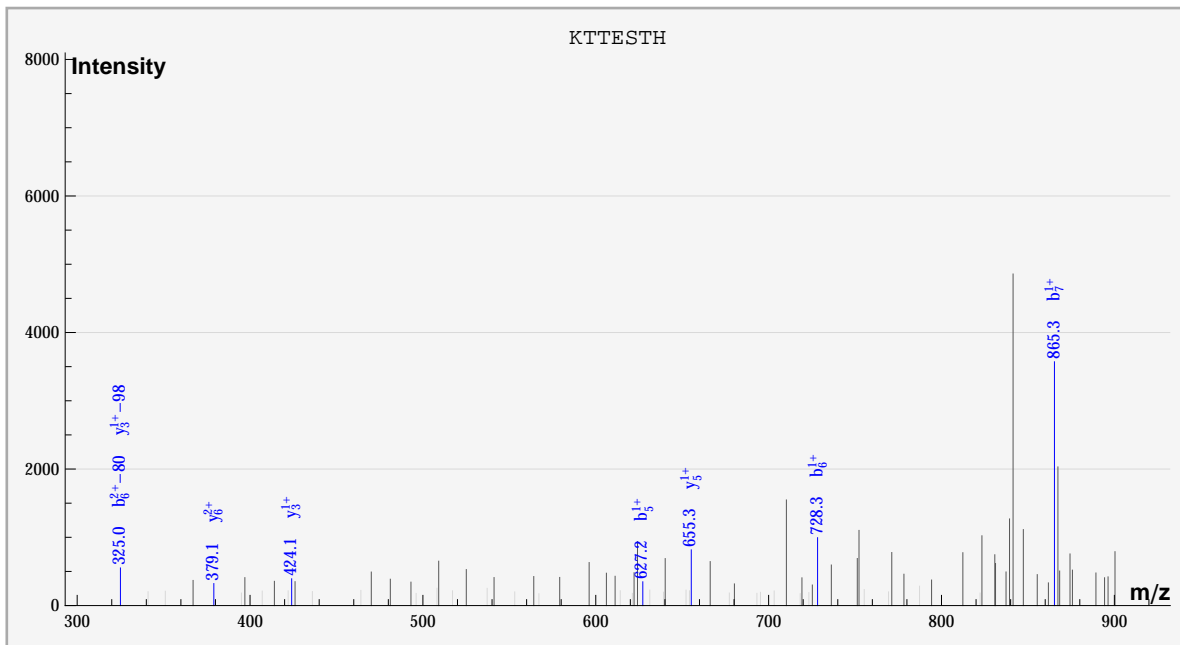

|   | # | b | b* | # | y | y* | P | P* |
|---|---|---|----|---|---|----|---|----|
| K | 1 |   |    |   |   |    |   |    |
| T | 2 |   |    | 6 | ✓ |    |   |    |
| T | 3 |   |    | 5 | ✓ |    |   |    |
| E | 4 |   |    | 4 |   |    |   |    |
| S | 5 | ✓ |    | 3 | ✓ | ✓  |   |    |
| T | 6 | ✓ | ✓  | 2 |   |    |   |    |
| H | 7 | ✓ |    | 1 |   |    |   |    |

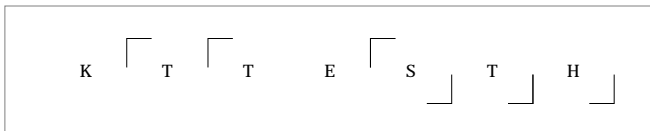

dbValid true KTTESTH PHOS(1) 1. 885. -1.64432 5.17967 100. ? 2556.

S\_Acido\_new%gi68566626|gb|AAY79555.1| KTTESTH%::::PHOS:::sample\_1%compd\_1118

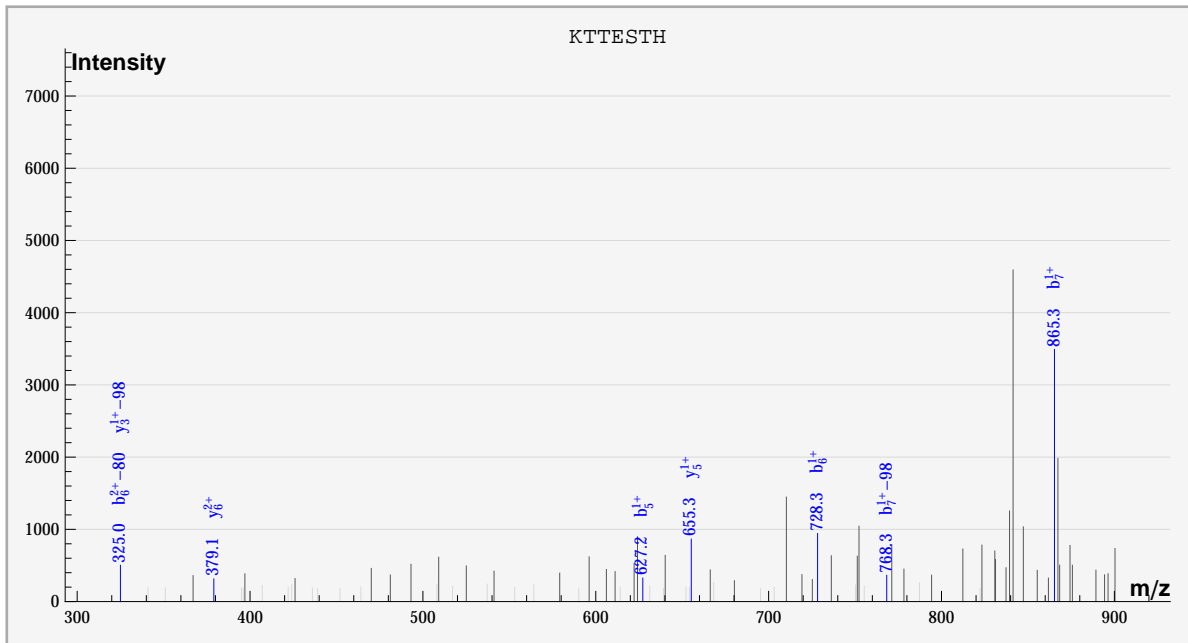

|   | # | b | b* | # | y | y* | P | P* |
|---|---|---|----|---|---|----|---|----|
| K | 1 |   |    |   |   |    |   |    |
| T | 2 |   |    | 6 | ✓ |    |   |    |
| T | 3 |   |    | 5 | ✓ |    |   |    |
| E | 4 |   |    | 4 |   |    |   |    |
| S | 5 | ✓ |    | 3 |   | ✓  |   |    |
| T | 6 | ✓ | ✓  | 2 |   |    |   |    |
| H | 7 | ✓ | ✓  | 1 |   |    |   |    |

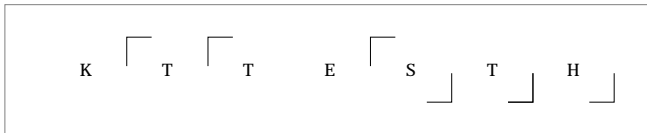

dbValid true VNQYFLPYIEMKK Oxidation\_M(1),PHOS(1) 2. 886. -1.0774 5.12179 100. ? 5202.  
 S\_Acido\_new%gil68567430|gb|AAy80359.1| VNQYFLPYIEMKK%::::PHOS:::::Oxidation\_M:::%sample\_1%compd\_3601

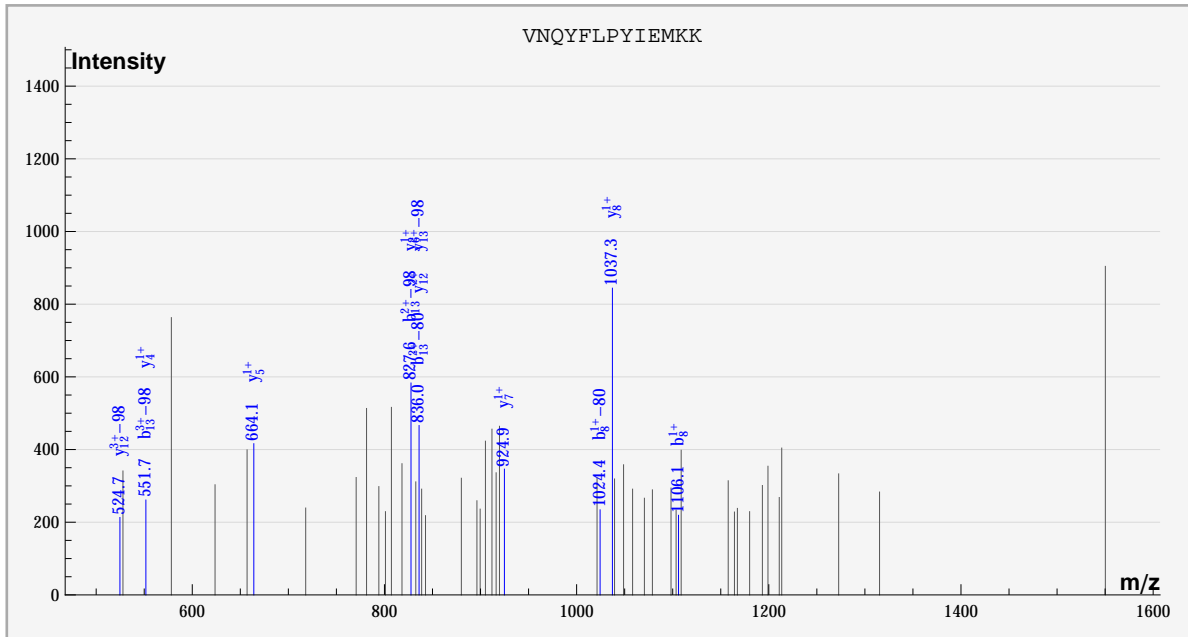

|   | #  | b | b* | #  | y | y* | P | P* |
|---|----|---|----|----|---|----|---|----|
| V | 1  |   |    |    |   |    |   | ✓  |
| N | 2  |   |    | 12 | ✓ | ✓  |   |    |
| Q | 3  |   |    | 11 |   |    |   |    |
| Y | 4  |   |    | 10 |   |    |   |    |
| F | 5  |   |    | 9  |   |    |   |    |
| L | 6  |   |    | 8  | ✓ |    |   |    |
| P | 7  |   |    | 7  | ✓ |    |   |    |
| Y | 8  | ✓ | ✓  | 6  | ✓ |    |   |    |
| I | 9  |   |    | 5  | ✓ |    |   |    |
| E | 10 |   |    | 4  | ✓ |    |   |    |
| M | 11 |   |    | 3  |   |    |   |    |
| K | 12 |   |    | 2  |   |    |   |    |
| K | 13 |   | ✓  | 1  |   |    |   |    |

┌ V ─┐ ┌ N ─┐ Q ─┐ Y ─┐ F ─┐ ┌ L ─┐ ┌ P ─┐ ┌ Y ─┐ ┌ I ─┐ ┌ E ─┐ M ─┐ K ─┐ K ─┐

dbValid true EEEILWAEKYRPK PHOS(1) 2. 887. -1.07327 5.34412 100. ? 2154.  
 S\_Acido\_new%gi|68567341|gb|AA80270.1| EEEILWAEKYRPK%:::PHOS:::sample\_1%compd\_828

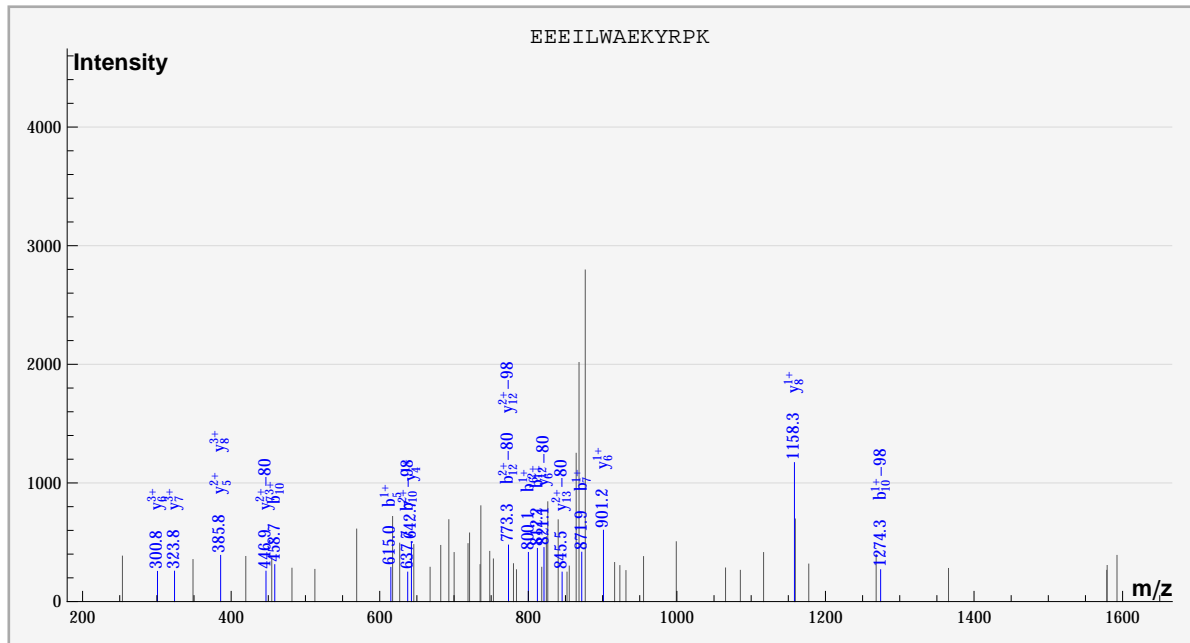

|   | #  | b | b* | #  | y | y* | P | P* |
|---|----|---|----|----|---|----|---|----|
| E | 1  |   |    |    |   |    |   | ✓  |
| E | 2  |   |    | 12 |   | ✓  |   |    |
| E | 3  |   |    | 11 |   |    |   |    |
| I | 4  |   |    | 10 |   |    |   |    |
| L | 5  | ✓ |    | 9  |   |    |   |    |
| W | 6  | ✓ |    | 8  | ✓ |    |   |    |
| A | 7  | ✓ |    | 7  | ✓ | ✓  |   |    |
| E | 8  |   |    | 6  | ✓ | ✓  |   |    |
| K | 9  |   |    | 5  | ✓ |    |   |    |
| Y | 10 | ✓ | ✓  | 4  | ✓ |    |   |    |
| R | 11 |   |    | 3  |   |    |   |    |
| P | 12 | ✓ | ✓  | 2  |   |    |   |    |
| K | 13 |   |    | 1  |   |    |   |    |

「 E 「 E E I L 「 W 「 A 「 E 「 K 「 Y 「 R P 「 K

dbValid true AIKLTLLSLDYSLK PHOS(1) 2. 887. -0.995553 5.13899 100. ? 3024.  
 S\_Acido\_new%gi|68567718|gb|AAY80647.1| AIKLTLLSLDYSLK%:::PHOS:::sample\_3%compd\_1474

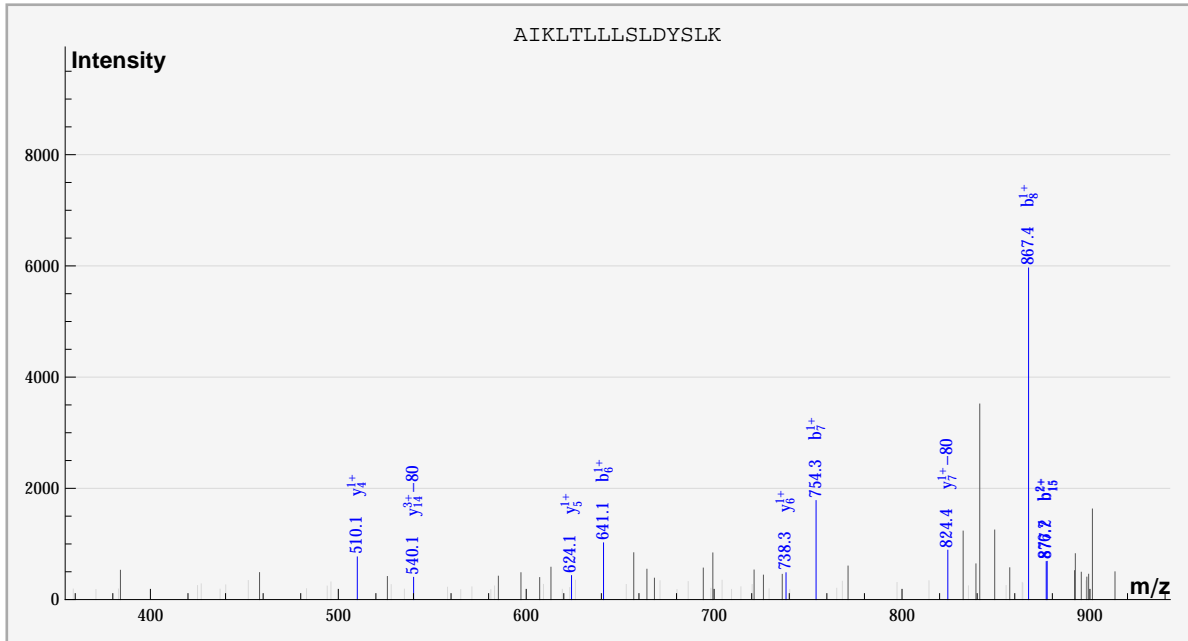

|   | #  | b | b* | #  | y | y* | P | P* |
|---|----|---|----|----|---|----|---|----|
| A | 1  |   |    |    |   |    |   |    |
| I | 2  |   |    | 14 |   | ✓  |   |    |
| K | 3  |   |    | 13 |   |    |   |    |
| L | 4  |   |    | 12 |   |    |   |    |
| T | 5  |   |    | 11 |   |    |   |    |
| L | 6  | ✓ |    | 10 |   |    |   |    |
| L | 7  | ✓ |    | 9  |   |    |   |    |
| L | 8  | ✓ |    | 8  |   |    |   |    |
| S | 9  |   |    | 7  |   | ✓  |   |    |
| L | 10 |   |    | 6  | ✓ |    |   |    |
| D | 11 |   |    | 5  | ✓ |    |   |    |
| Y | 12 |   |    | 4  | ✓ |    |   |    |
| S | 13 |   |    | 3  |   |    |   |    |
| L | 14 |   |    | 2  |   |    |   |    |
| K | 15 | ✓ |    | 1  |   |    |   |    |

A I K L T L L L S L D Y S L K

dbValid true GKVARYISEILEEGK PHOS(1) 2. 888. -1.54689 5.56712 100. ? 1824.  
 S\_Acido\_new%gi|68567177|gb|AAy80106.1| GKVARYISEILEEGK%::::PHOS::::::::::%sample\_2%cmpd\_527

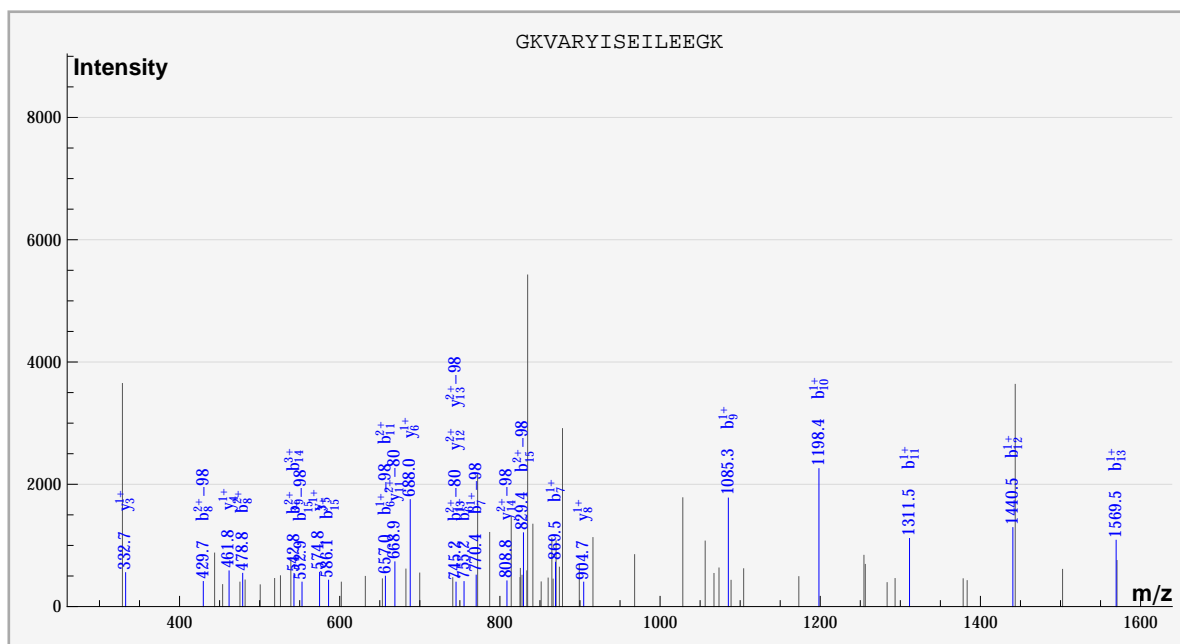

|   | #  | b | b* | #  | y | y* | P | P* |
|---|----|---|----|----|---|----|---|----|
| G | 1  |   |    |    |   |    |   |    |
| K | 2  |   |    | 14 |   | ✓  |   |    |
| V | 3  |   |    | 13 |   | ✓  |   |    |
| A | 4  |   |    | 12 | ✓ |    |   |    |
| R | 5  |   |    | 11 |   | ✓  |   |    |
| Y | 6  | ✓ | ✓  | 10 |   |    |   |    |
| I | 7  | ✓ | ✓  | 9  |   |    |   |    |
| S | 8  | ✓ | ✓  | 8  | ✓ |    |   |    |
| E | 9  | ✓ |    | 7  |   |    |   |    |
| I | 10 | ✓ |    | 6  | ✓ |    |   |    |
| L | 11 | ✓ |    | 5  | ✓ |    |   |    |
| E | 12 | ✓ |    | 4  | ✓ |    |   |    |
| E | 13 | ✓ | ✓  | 3  | ✓ |    |   |    |
| G | 14 | ✓ |    | 2  |   |    |   |    |
| K | 15 | ✓ | ✓  | 1  |   |    |   |    |

G [ K [ V [ A [ R [ Y ] I ] S ] E ] I ] L ] E ] E ] G ] K ]



dbValid true AGLIGFTK PHOS(1) 1. 888. -1.55665 5.10344 100. ? 1896.  
 S\_Acido\_new%gi|68568339|gb|AAY81268.1| AGLIGFTK%::::::PHOS::%sample\_1%cmpd\_596

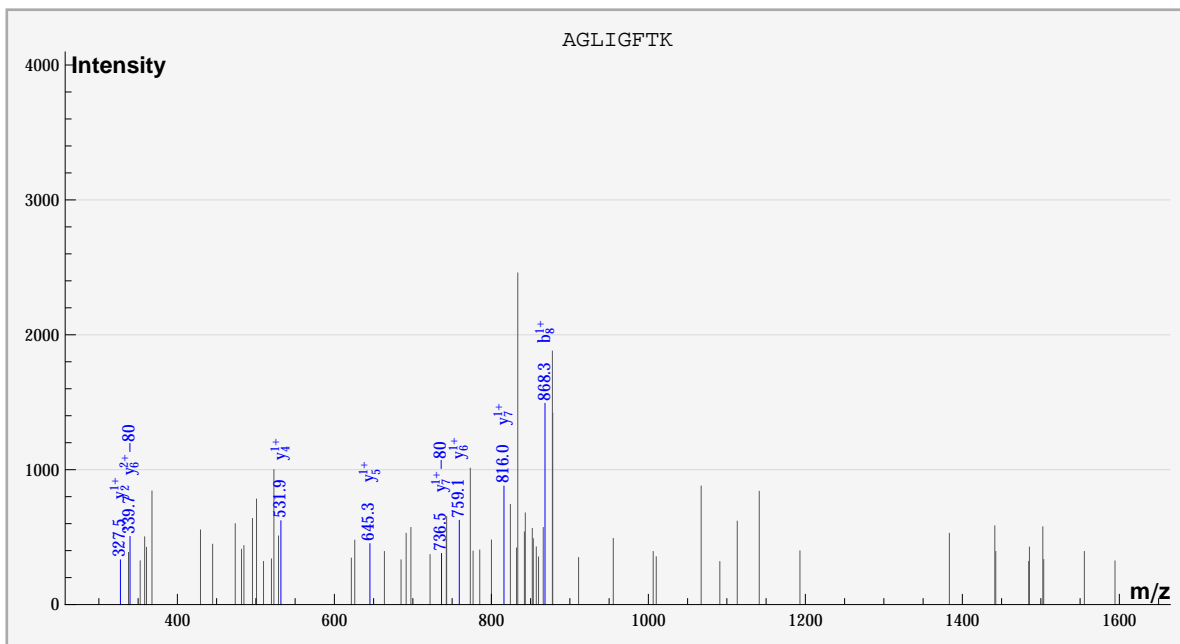

|   | # | b | b* | # | y | y* | P | P* |
|---|---|---|----|---|---|----|---|----|
| A | 1 |   |    |   |   |    |   |    |
| G | 2 |   |    | 7 | ✓ | ✓  |   |    |
| L | 3 |   |    | 6 | ✓ | ✓  |   |    |
| I | 4 |   |    | 5 | ✓ |    |   |    |
| G | 5 |   |    | 4 | ✓ |    |   |    |
| F | 6 |   |    | 3 |   |    |   |    |
| T | 7 |   |    | 2 | ✓ |    |   |    |
| K | 8 | ✓ |    | 1 |   |    |   |    |

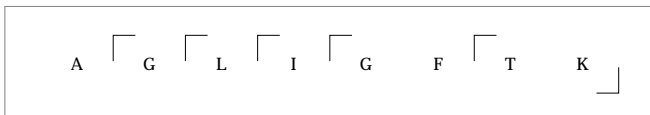

dbValid true LVLTTIAQAGPSGLDSR PHOS(1) 2. 888. 1.95602 5.12159 100. ? 2172.  
 S\_Acido\_new%gi|68567660|gb|AA80589.1| LVLTTIAQAGPSGLDSR%:.....:PHOS::%sample\_1%compd\_793

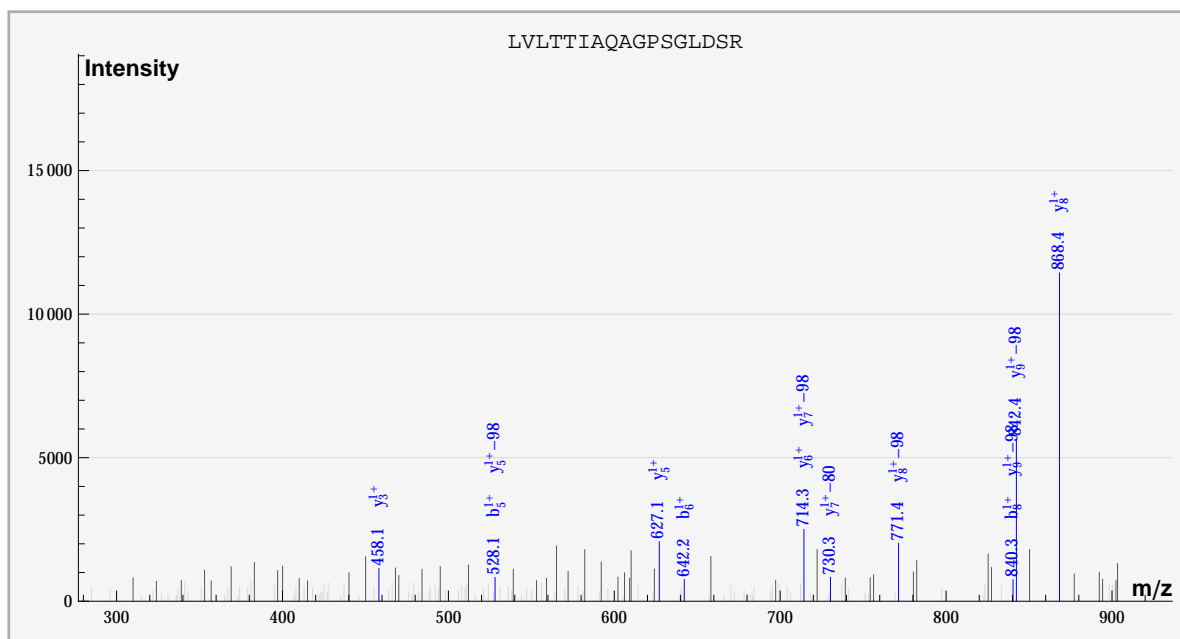

|   | #  | b | b* | #  | y | y* | P | P* |
|---|----|---|----|----|---|----|---|----|
| L | 1  |   |    |    |   |    |   |    |
| V | 2  |   |    | 16 |   |    |   |    |
| L | 3  |   |    | 15 |   |    |   |    |
| T | 4  |   |    | 14 |   |    |   |    |
| T | 5  | ✓ |    | 13 |   |    |   |    |
| I | 6  | ✓ |    | 12 |   |    |   |    |
| A | 7  |   |    | 11 |   |    |   |    |
| Q | 8  | ✓ |    | 10 |   |    |   |    |
| A | 9  |   |    | 9  |   | ✓  |   |    |
| G | 10 |   |    | 8  | ✓ | ✓  |   |    |
| P | 11 |   |    | 7  |   | ✓  |   |    |
| S | 12 |   |    | 6  | ✓ | ✓  |   |    |
| G | 13 |   |    | 5  | ✓ | ✓  |   |    |
| L | 14 |   |    | 4  |   |    |   |    |
| D | 15 |   |    | 3  | ✓ |    |   |    |
| S | 16 |   |    | 2  |   |    |   |    |
| R | 17 |   |    | 1  |   |    |   |    |

L V L T T I A Q A G P S G L D S R

dbValid true LVLTTIAQAGPSGLDSR PHOS(1) 2. 888. 1.95602 5.30893 100. ? 2214.  
 S\_Acido\_new%gil68567660|gb|AAy80589.1| LVLTTIAQAGPSGLDSR%:.....PHOS::%sample\_3%compd\_800

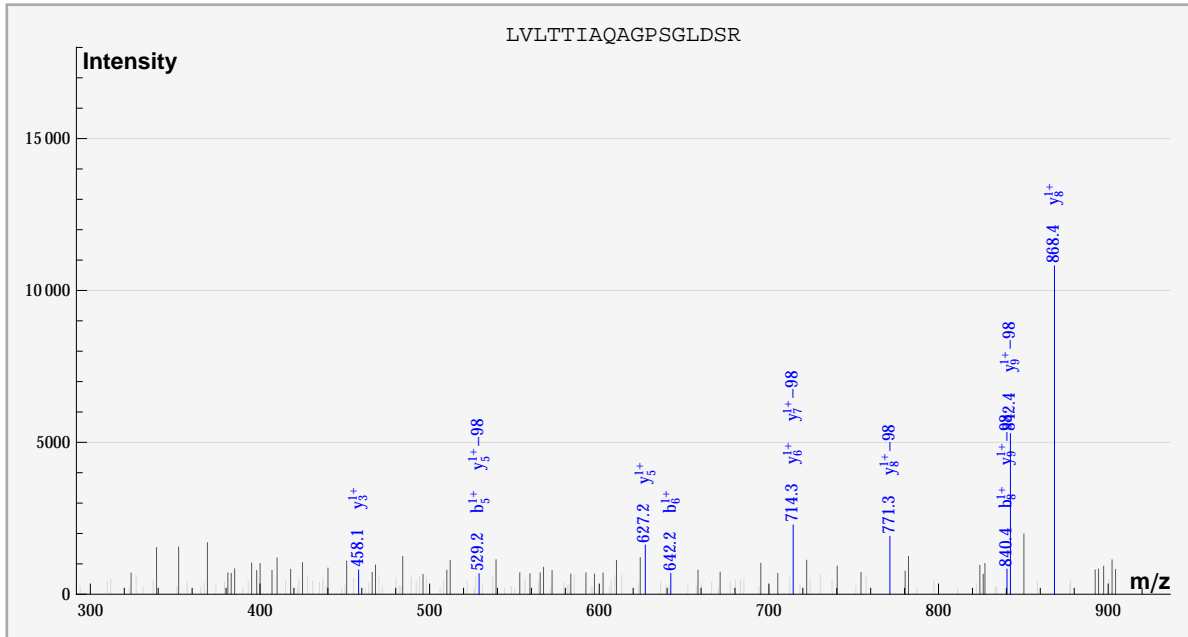

|   | #  | b | b* | #  | y | y* | P | P* |
|---|----|---|----|----|---|----|---|----|
| L | 1  |   |    |    |   |    |   |    |
| V | 2  |   |    | 16 |   |    |   |    |
| L | 3  |   |    | 15 |   |    |   |    |
| T | 4  |   |    | 14 |   |    |   |    |
| T | 5  | ✓ |    | 13 |   |    |   |    |
| I | 6  | ✓ |    | 12 |   |    |   |    |
| A | 7  |   |    | 11 |   |    |   |    |
| Q | 8  | ✓ |    | 10 |   |    |   |    |
| A | 9  |   |    | 9  |   | ✓  |   |    |
| G | 10 |   |    | 8  | ✓ | ✓  |   |    |
| P | 11 |   |    | 7  |   | ✓  |   |    |
| S | 12 |   |    | 6  | ✓ | ✓  |   |    |
| G | 13 |   |    | 5  | ✓ | ✓  |   |    |
| L | 14 |   |    | 4  |   |    |   |    |
| D | 15 |   |    | 3  | ✓ |    |   |    |
| S | 16 |   |    | 2  |   |    |   |    |
| R | 17 |   |    | 1  |   |    |   |    |

L V L T T I A Q A G P S G L D S R

dbValid true LVLTTIAQAGPSGLDSR PHOS(1) 2. 888. 1.95602 5.17735 100. ? 2250.  
 S\_Acido\_new%gi|68567660|gb|AA80589.1| LVLTTIAQAGPSGLDSR%:::PHOS::%sample\_3%compd\_831

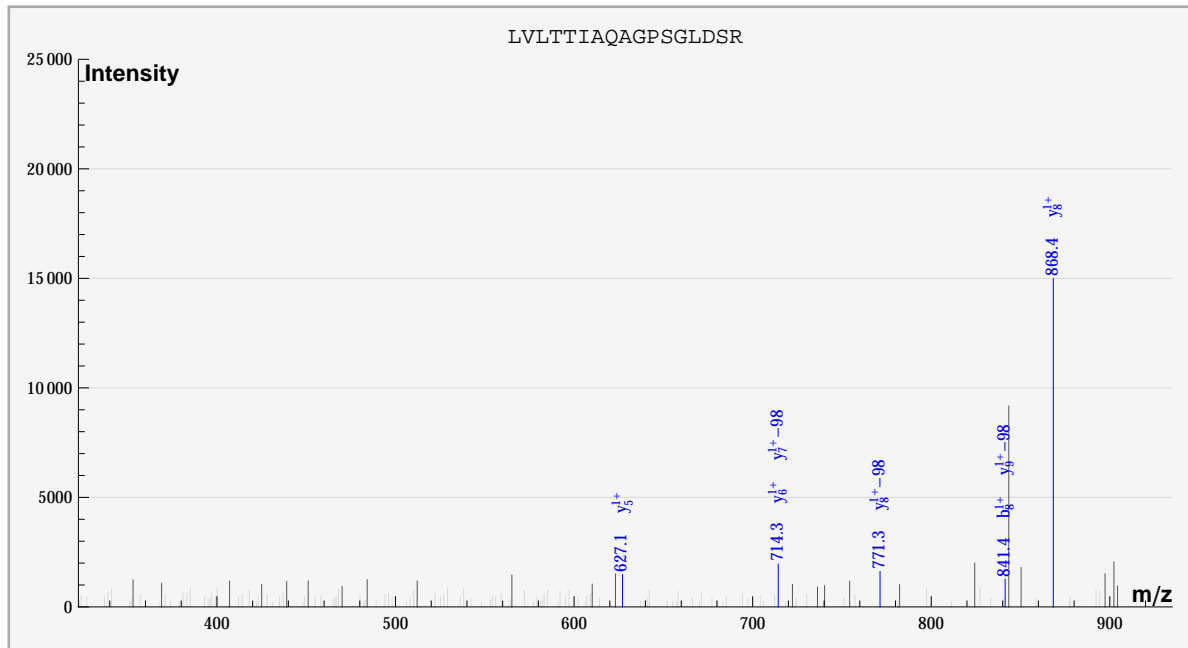

|   | #  | b | b* | #  | y | y* | P | P* |
|---|----|---|----|----|---|----|---|----|
| L | 1  |   |    |    |   |    |   |    |
| V | 2  |   |    | 16 |   |    |   |    |
| L | 3  |   |    | 15 |   |    |   |    |
| T | 4  |   |    | 14 |   |    |   |    |
| T | 5  |   |    | 13 |   |    |   |    |
| I | 6  |   |    | 12 |   |    |   |    |
| A | 7  |   |    | 11 |   |    |   |    |
| Q | 8  | ✓ |    | 10 |   |    |   |    |
| A | 9  |   |    | 9  |   | ✓  |   |    |
| G | 10 |   |    | 8  | ✓ | ✓  |   |    |
| P | 11 |   |    | 7  |   | ✓  |   |    |
| S | 12 |   |    | 6  | ✓ |    |   |    |
| G | 13 |   |    | 5  | ✓ |    |   |    |
| L | 14 |   |    | 4  |   |    |   |    |
| D | 15 |   |    | 3  |   |    |   |    |
| S | 16 |   |    | 2  |   |    |   |    |
| R | 17 |   |    | 1  |   |    |   |    |

L V L T T I A Q ] A [ G [ P [ S [ G L D S R

dbValid true LVLTTIAQAGPSGLDSR PHOS(1) 2. 888. 1.95602 5.07655 100. ? 2454.  
 S\_Acido\_new%gi|68567660|gb|AAV80589.1| LVLTTIAQAGPSGLDSR%:::PHOS::%sample\_3%compd\_1006

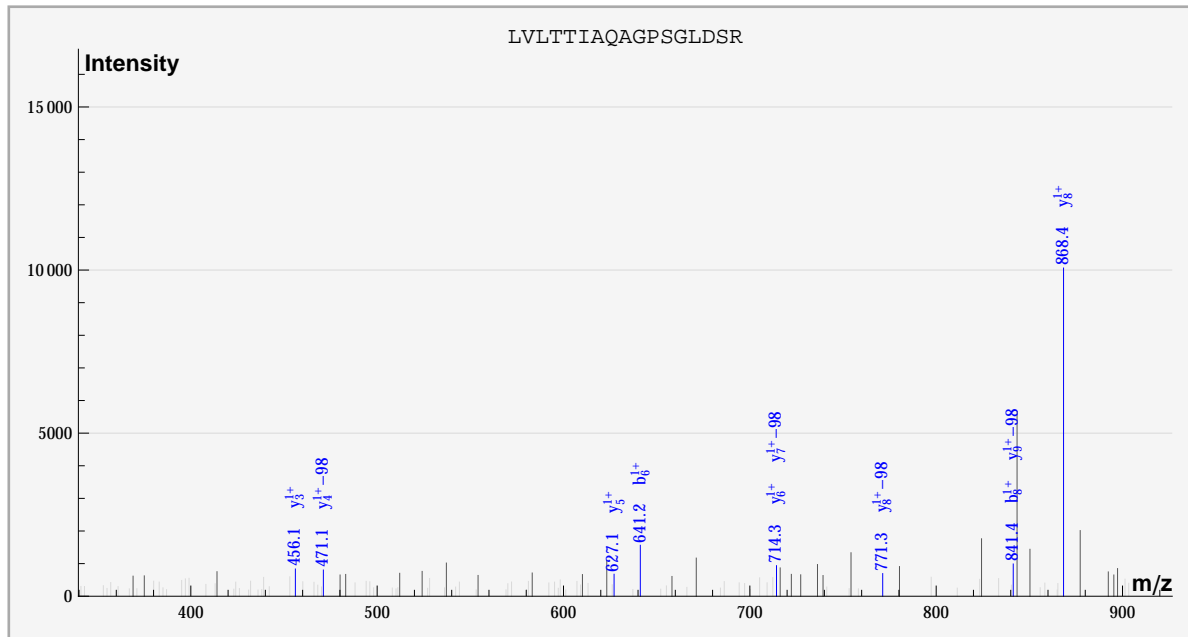

|   | #  | b | b* | #  | y | y* | P | P* |
|---|----|---|----|----|---|----|---|----|
| L | 1  |   |    |    |   |    |   |    |
| V | 2  |   |    | 16 |   |    |   |    |
| L | 3  |   |    | 15 |   |    |   |    |
| T | 4  |   |    | 14 |   |    |   |    |
| T | 5  |   |    | 13 |   |    |   |    |
| I | 6  | ✓ |    | 12 |   |    |   |    |
| A | 7  |   |    | 11 |   |    |   |    |
| Q | 8  | ✓ |    | 10 |   |    |   |    |
| A | 9  |   |    | 9  |   | ✓  |   |    |
| G | 10 |   |    | 8  | ✓ | ✓  |   |    |
| P | 11 |   |    | 7  |   | ✓  |   |    |
| S | 12 |   |    | 6  | ✓ |    |   |    |
| G | 13 |   |    | 5  | ✓ |    |   |    |
| L | 14 |   |    | 4  |   | ✓  |   |    |
| D | 15 |   |    | 3  | ✓ |    |   |    |
| S | 16 |   |    | 2  |   |    |   |    |
| R | 17 |   |    | 1  |   |    |   |    |

L V L T T I A Q A G P S G L D S R

dbValid true LVLTTIAQAGPSGLDSR PHOS(1) 2. 888. 1.95602 5.31483 100. ? 2496.  
 S\_Acido\_new%gi|68567660|gb|AA80589.1| LVLTTIAQAGPSGLDSR%:::PHOS::%sample\_1%cmpd\_1070

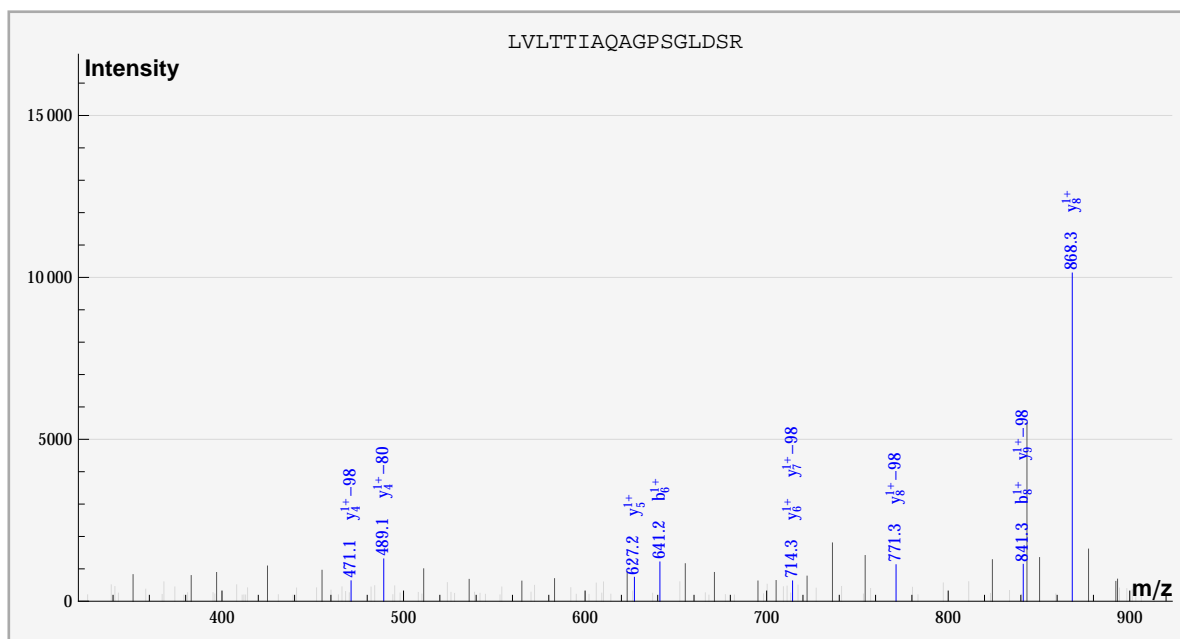

|   | #  | b | b* | #  | y | y* | P | P* |
|---|----|---|----|----|---|----|---|----|
| L | 1  |   |    |    |   |    |   |    |
| V | 2  |   |    | 16 |   |    |   |    |
| L | 3  |   |    | 15 |   |    |   |    |
| T | 4  |   |    | 14 |   |    |   |    |
| T | 5  |   |    | 13 |   |    |   |    |
| I | 6  | ✓ |    | 12 |   |    |   |    |
| A | 7  |   |    | 11 |   |    |   |    |
| Q | 8  | ✓ |    | 10 |   |    |   |    |
| A | 9  |   |    | 9  |   | ✓  |   |    |
| G | 10 |   |    | 8  | ✓ | ✓  |   |    |
| P | 11 |   |    | 7  |   | ✓  |   |    |
| S | 12 |   |    | 6  | ✓ |    |   |    |
| G | 13 |   |    | 5  | ✓ |    |   |    |
| L | 14 |   |    | 4  |   | ✓  |   |    |
| D | 15 |   |    | 3  |   |    |   |    |
| S | 16 |   |    | 2  |   |    |   |    |
| R | 17 |   |    | 1  |   |    |   |    |

L V L T T I A Q A G P S G L D S R

dbValid true LVLTTIAQAGPSGLDSR PHOS(1) 2. 888. 1.95602 5.26742 100. ? 2682.  
 S\_Acido\_new%gi|68567660|gb|AA80589.1| LVLTTIAQAGPSGLDSR%:::PHOS::%sample\_3%compd\_1201

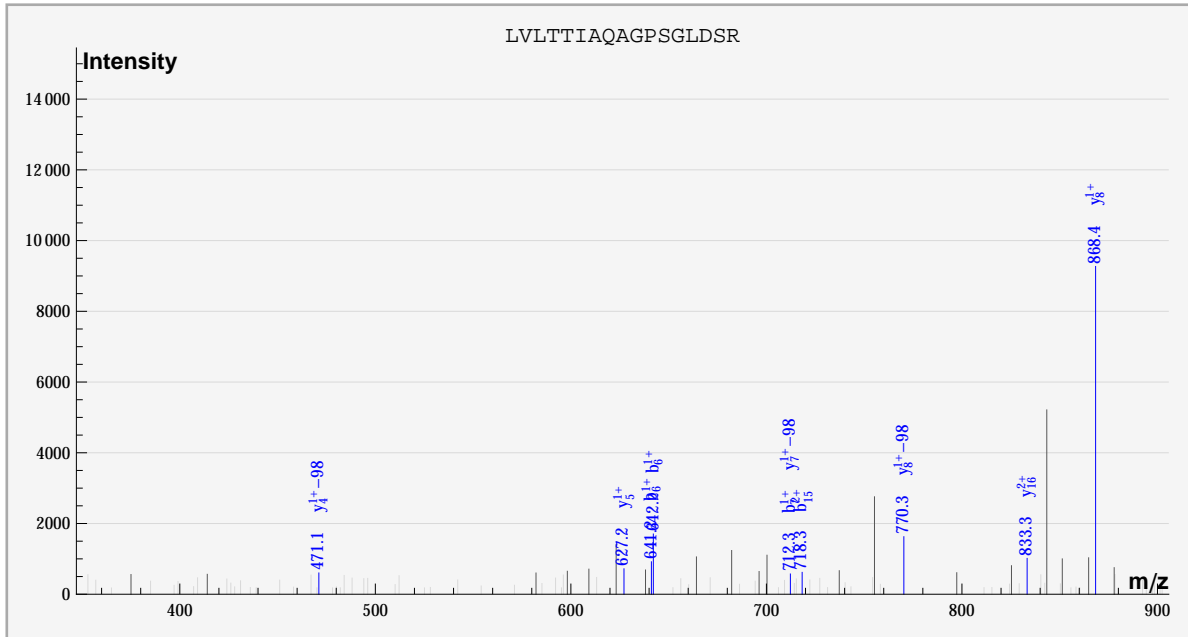

|   | #  | b | b* | #  | y | y* | P | P* |
|---|----|---|----|----|---|----|---|----|
| L | 1  |   |    |    |   |    |   |    |
| V | 2  |   |    | 16 | ✓ |    |   |    |
| L | 3  |   |    | 15 |   |    |   |    |
| T | 4  |   |    | 14 |   |    |   |    |
| T | 5  |   |    | 13 |   |    |   |    |
| I | 6  | ✓ |    | 12 |   |    |   |    |
| A | 7  | ✓ |    | 11 |   |    |   |    |
| Q | 8  |   |    | 10 |   |    |   |    |
| A | 9  |   |    | 9  |   |    |   |    |
| G | 10 |   |    | 8  | ✓ | ✓  |   |    |
| P | 11 |   |    | 7  |   | ✓  |   |    |
| S | 12 |   |    | 6  |   |    |   |    |
| G | 13 |   |    | 5  | ✓ |    |   |    |
| L | 14 |   |    | 4  |   | ✓  |   |    |
| D | 15 | ✓ |    | 3  |   |    |   |    |
| S | 16 |   |    | 2  |   |    |   |    |
| R | 17 |   |    | 1  |   |    |   |    |

L V L T T I A Q A G P S G L D S R

dbValid true EKGYKTFVLGVSLPR PHOS(1) 2. 889. -1.53144 5.18775 100. ? 3648.  
 S\_Acido\_new%gi|68567718|gb|AAY80647.1| EKGYKTFVLGVSLPR%:.....PHOS:::%sample\_2%compd\_2194

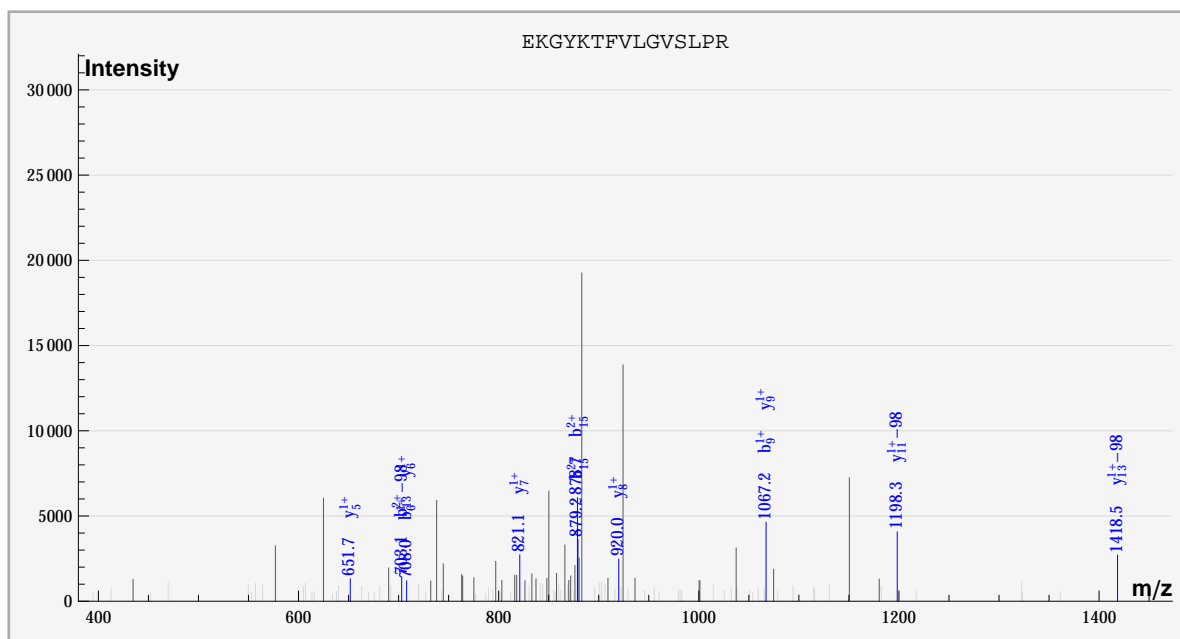

|   | #  | b | b* | #  | y | y* | P | P* |
|---|----|---|----|----|---|----|---|----|
| E | 1  |   |    |    |   |    |   |    |
| K | 2  |   |    | 14 |   |    |   |    |
| G | 3  |   |    | 13 |   | ✓  |   |    |
| Y | 4  |   |    | 12 |   |    |   |    |
| K | 5  |   |    | 11 |   | ✓  |   |    |
| T | 6  | ✓ |    | 10 |   |    |   |    |
| F | 7  |   |    | 9  |   | ✓  |   |    |
| V | 8  |   |    | 8  |   | ✓  |   |    |
| L | 9  | ✓ |    | 7  |   | ✓  |   |    |
| G | 10 |   |    | 6  |   | ✓  |   |    |
| V | 11 |   |    | 5  |   | ✓  |   |    |
| S | 12 |   |    | 4  |   |    |   |    |
| L | 13 |   | ✓  | 3  |   |    |   |    |
| P | 14 |   |    | 2  |   |    |   |    |
| R | 15 | ✓ |    | 1  |   |    |   |    |

E K [G Y [K T ] F [V [L ] G [V S L ] P R ]



dbValid true VIKAMPCLDDTRER Cys\_CAM(1),PHOS(1) 2. 891. 1.41515 5.51741 100. ? 3012.  
 S\_Acido\_new%gil68568623|gb|AAy81552.1| VIKAMPCLDDTRER%:::Cys\_CAM:::PHOS:::sample\_2%compd\_1394

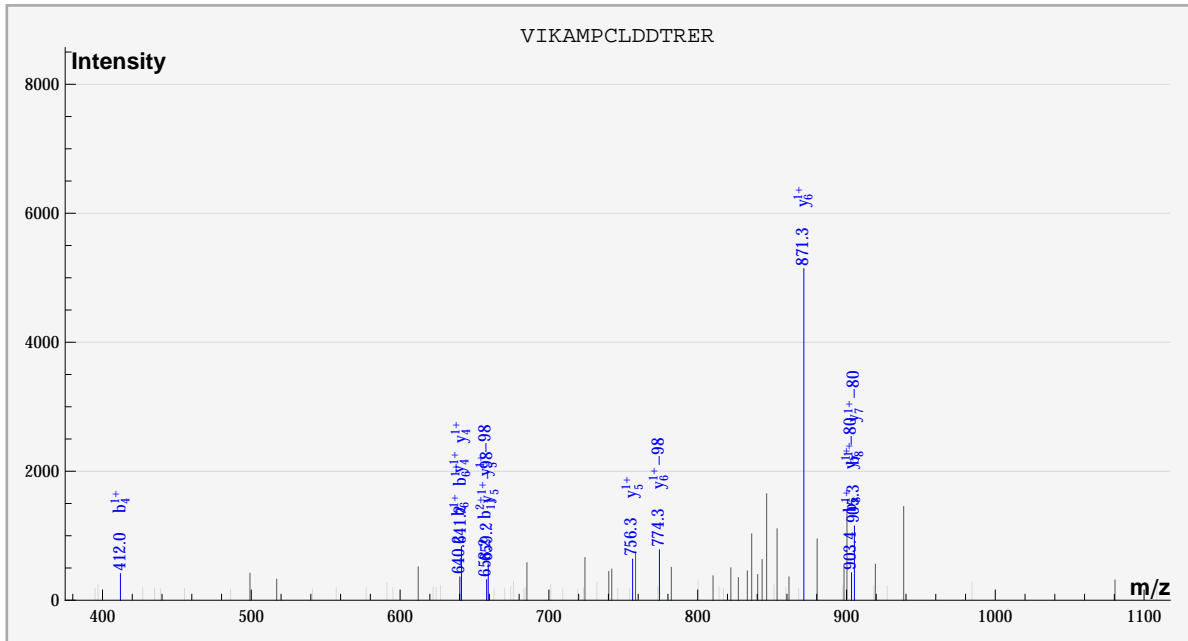

|   | #  | b | b* | #  | y | y* | P | P* |
|---|----|---|----|----|---|----|---|----|
| V | 1  |   |    |    |   |    |   |    |
| I | 2  |   |    | 13 |   |    |   |    |
| K | 3  |   |    | 12 |   |    |   |    |
| A | 4  | ✓ |    | 11 |   |    |   |    |
| M | 5  |   |    | 10 |   |    |   |    |
| P | 6  | ✓ |    | 9  |   |    |   |    |
| C | 7  |   |    | 8  |   |    |   |    |
| L | 8  | ✓ |    | 7  |   | ✓  |   |    |
| D | 9  |   |    | 6  | ✓ | ✓  |   |    |
| D | 10 |   |    | 5  | ✓ | ✓  |   |    |
| T | 11 | ✓ |    | 4  | ✓ |    |   |    |
| R | 12 |   |    | 3  |   |    |   |    |
| E | 13 |   |    | 2  |   |    |   |    |
| R | 14 |   |    | 1  |   |    |   |    |

V I K A M P C L D D T R E R

dbValid true VIKAMPLDDTRER Cys\_CAM(1),PHOS(1) 2. 891. 1.41515 5.36148 100. ? 3024.  
 S\_Acido\_new%gil68568623|glb|AAY81552.1| VIKAMPLDDTRER%:::Cys\_CAM:::PHOS:::sample\_2%compd\_1404

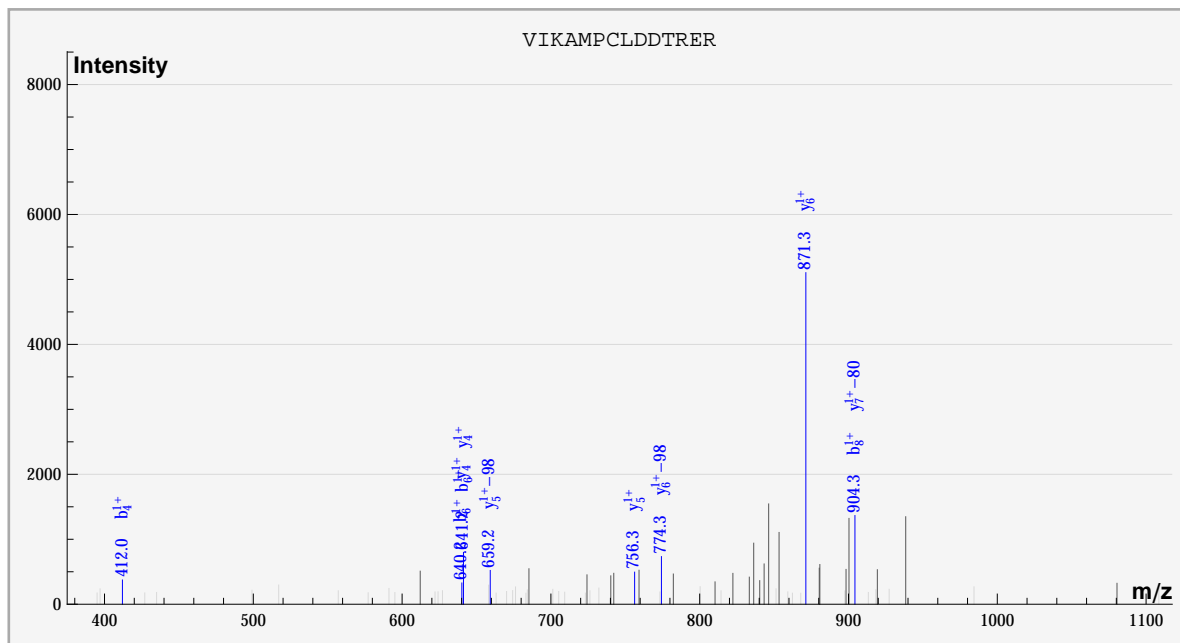

|   | #  | b | b* | #  | y | y* | P | P* |
|---|----|---|----|----|---|----|---|----|
| V | 1  |   |    |    |   |    |   |    |
| I | 2  |   |    | 13 |   |    |   |    |
| K | 3  |   |    | 12 |   |    |   |    |
| A | 4  | ✓ |    | 11 |   |    |   |    |
| M | 5  |   |    | 10 |   |    |   |    |
| P | 6  | ✓ |    | 9  |   |    |   |    |
| C | 7  |   |    | 8  |   |    |   |    |
| L | 8  | ✓ |    | 7  |   | ✓  |   |    |
| D | 9  |   |    | 6  | ✓ | ✓  |   |    |
| D | 10 |   |    | 5  | ✓ | ✓  |   |    |
| T | 11 |   |    | 4  | ✓ |    |   |    |
| R | 12 |   |    | 3  |   |    |   |    |
| E | 13 |   |    | 2  |   |    |   |    |
| R | 14 |   |    | 1  |   |    |   |    |

V I K A M P C L D D T R E R

dbValid true VIKAMPCLDDTRER Cys\_CAM(1),PHOS(1) 2. 891. 1.41515 5.24712 100. ? 3036.  
 S\_Acido\_new%gil68568623|gb|AAY81552.1| VIKAMPCLDDTRER%:::Cys\_CAM:::PHOS:::%sample\_2%compd\_1414

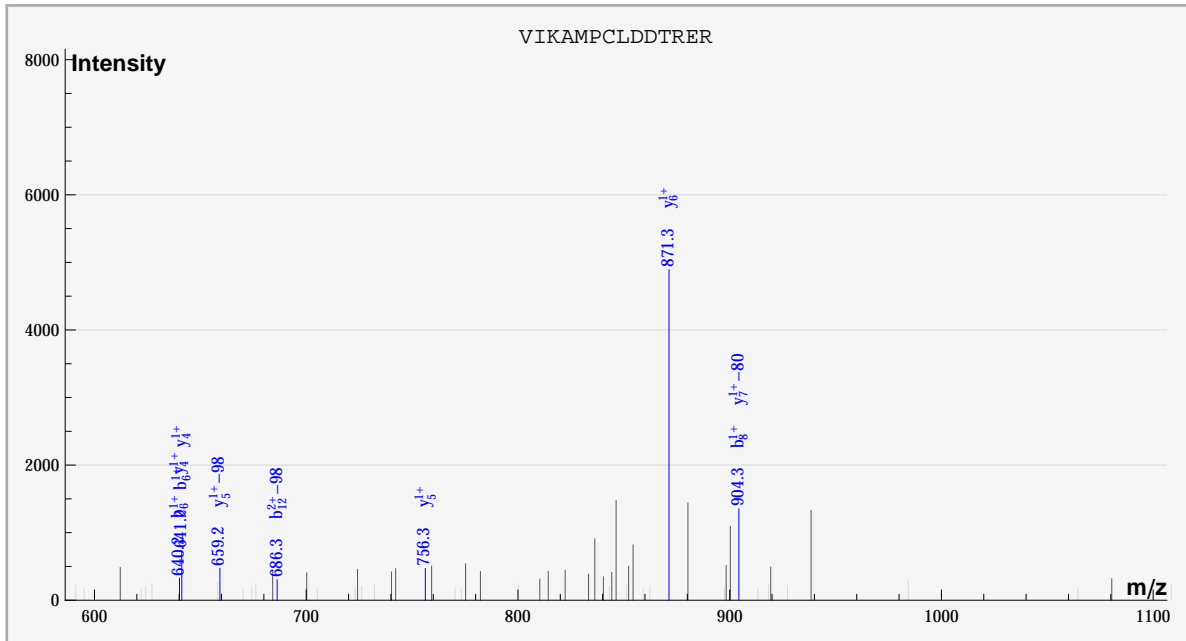

|   | #  | b | b* | #  | y | y* | P | P* |
|---|----|---|----|----|---|----|---|----|
| V | 1  |   |    |    |   |    |   |    |
| I | 2  |   |    | 13 |   |    |   |    |
| K | 3  |   |    | 12 |   |    |   |    |
| A | 4  |   |    | 11 |   |    |   |    |
| M | 5  |   |    | 10 |   |    |   |    |
| P | 6  | ✓ |    | 9  |   |    |   |    |
| C | 7  |   |    | 8  |   |    |   |    |
| L | 8  | ✓ |    | 7  |   | ✓  |   |    |
| D | 9  |   |    | 6  | ✓ |    |   |    |
| D | 10 |   |    | 5  | ✓ | ✓  |   |    |
| T | 11 |   |    | 4  | ✓ |    |   |    |
| R | 12 |   | ✓  | 3  |   |    |   |    |
| E | 13 |   |    | 2  |   |    |   |    |
| R | 14 |   |    | 1  |   |    |   |    |

V I K A M P C L D D T R E R

dbValid true VIKAMPCLDDTRER Cys\_CAM(1),PHOS(1) 2. 891. 1.41515 5.25745 100. ? 3048.  
 S\_Acido\_new%gil68568623|gb|AAY81552.1| VIKAMPCLDDTRER%:::Cys\_CAM:::PHOS:::%sample\_2%compd\_1424

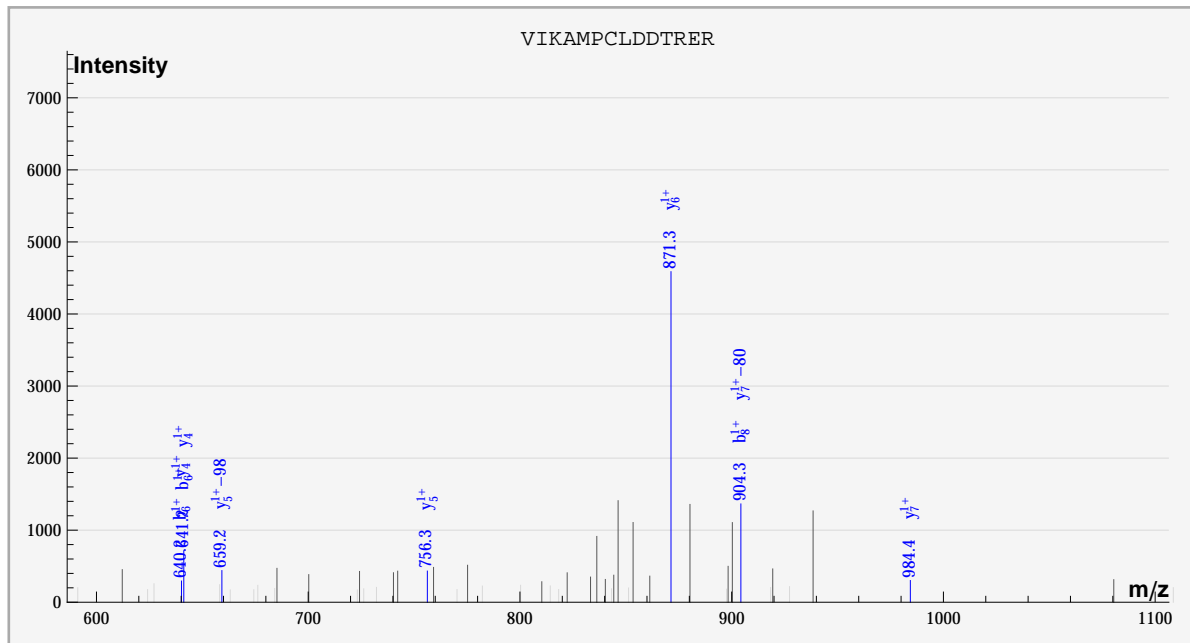

|   | #  | b | b* | #  | y | y* | P | P* |
|---|----|---|----|----|---|----|---|----|
| V | 1  |   |    |    |   |    |   |    |
| I | 2  |   |    | 13 |   |    |   |    |
| K | 3  |   |    | 12 |   |    |   |    |
| A | 4  |   |    | 11 |   |    |   |    |
| M | 5  |   |    | 10 |   |    |   |    |
| P | 6  | ✓ |    | 9  |   |    |   |    |
| C | 7  |   |    | 8  |   |    |   |    |
| L | 8  | ✓ |    | 7  | ✓ | ✓  |   |    |
| D | 9  |   |    | 6  | ✓ |    |   |    |
| D | 10 |   |    | 5  | ✓ | ✓  |   |    |
| T | 11 |   |    | 4  | ✓ |    |   |    |
| R | 12 |   |    | 3  |   |    |   |    |
| E | 13 |   |    | 2  |   |    |   |    |
| R | 14 |   |    | 1  |   |    |   |    |

V I K A M P C L D D T R E R

dbValid true KLITTR PHOS(2) 1. 892. -0.589995 5.21414 100. ? 1884.  
 S\_Acido\_new%gil68566637|gb|AA79566.1| KLITTR%:::PHOS:PHOS::%sample\_3%compd\_577

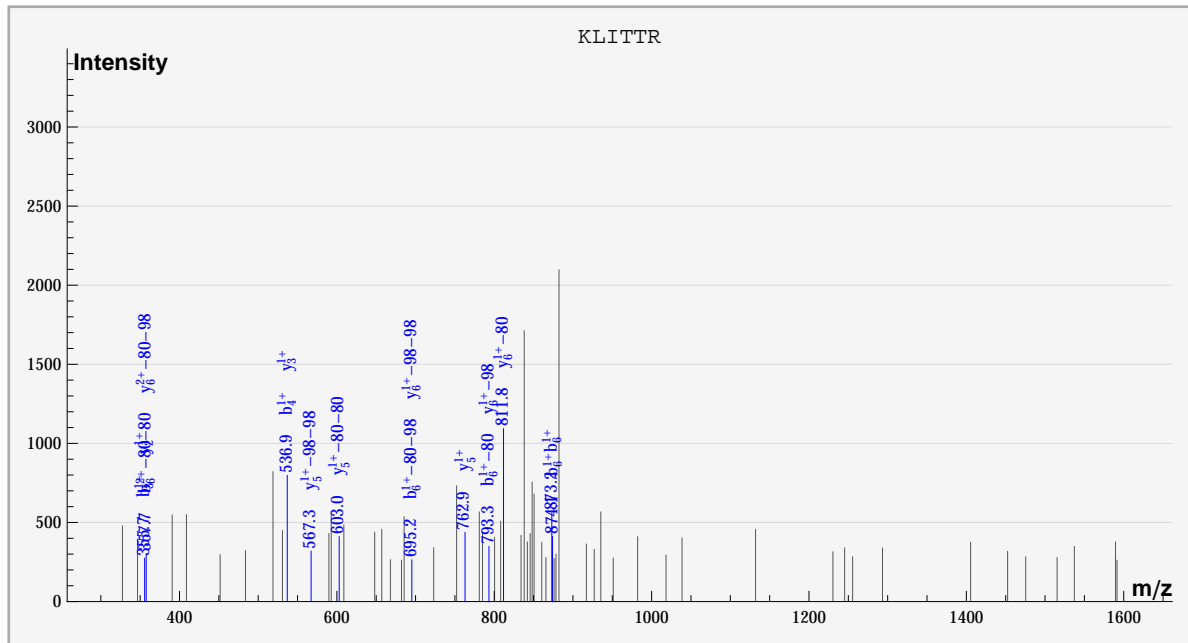

|   | # | b | b* | # | y | y* | P | P* |
|---|---|---|----|---|---|----|---|----|
| K | 1 |   |    |   |   |    |   | ✓  |
| L | 2 |   |    | 5 | ✓ | ✓  |   |    |
| I | 3 | ✓ |    | 4 |   |    |   |    |
| T | 4 | ✓ |    | 3 | ✓ |    |   |    |
| T | 5 |   |    | 2 | ✓ |    |   |    |
| R | 6 | ✓ | ✓  | 1 |   |    |   |    |

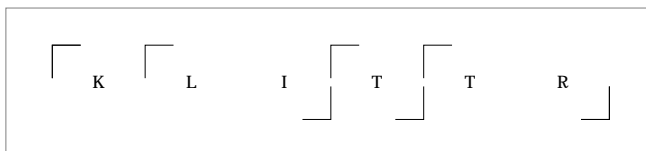

dbValid true KTYGDFGSGYPGDKK PHOS(2) 2. 892. -1.64506 5.76967 100. ? 2742.  
 S\_Acido\_new%gi|68567391|gb|AA80320.1| KTYGDFGSGYPGDKK%::PHOS:PHOS:::sample\_3%compd\_1364

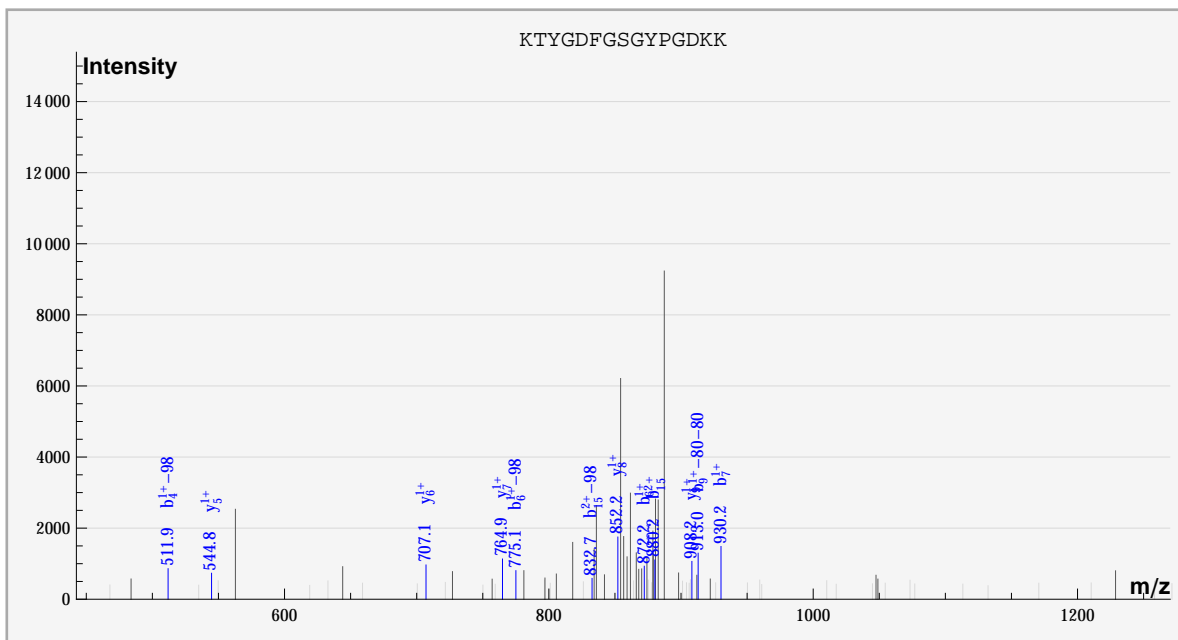

|   | #  | b | b* | #  | y | y* | P | P* |
|---|----|---|----|----|---|----|---|----|
| K | 1  |   |    |    |   |    |   |    |
| T | 2  |   |    | 14 |   |    |   |    |
| Y | 3  |   |    | 13 |   |    |   |    |
| G | 4  |   | ✓  | 12 |   |    |   |    |
| D | 5  |   |    | 11 |   |    |   |    |
| F | 6  | ✓ | ✓  | 10 |   |    |   |    |
| G | 7  | ✓ |    | 9  | ✓ |    |   |    |
| S | 8  |   |    | 8  | ✓ |    |   |    |
| G | 9  |   | ✓  | 7  | ✓ |    |   |    |
| Y | 10 |   |    | 6  | ✓ |    |   |    |
| P | 11 |   |    | 5  | ✓ |    |   |    |
| G | 12 |   |    | 4  |   |    |   |    |
| D | 13 |   |    | 3  |   |    |   |    |
| K | 14 |   |    | 2  |   |    |   |    |
| K | 15 | ✓ | ✓  | 1  |   |    |   |    |

K T Y G D F G S G Y P G D K K

dbValid true MRDVEDYYKMYR Oxidation\_M(2),PHOS(1) 2. 892.  
 -1.14287 5.91058 100. ? 4878. S\_Acido\_new%gi68566757|gb|AAY79686.1|  
 MRDVEDYYKMYR%:Oxidation\_M:.....Oxidation\_M:PHOS::%sample\_3%compd\_3316

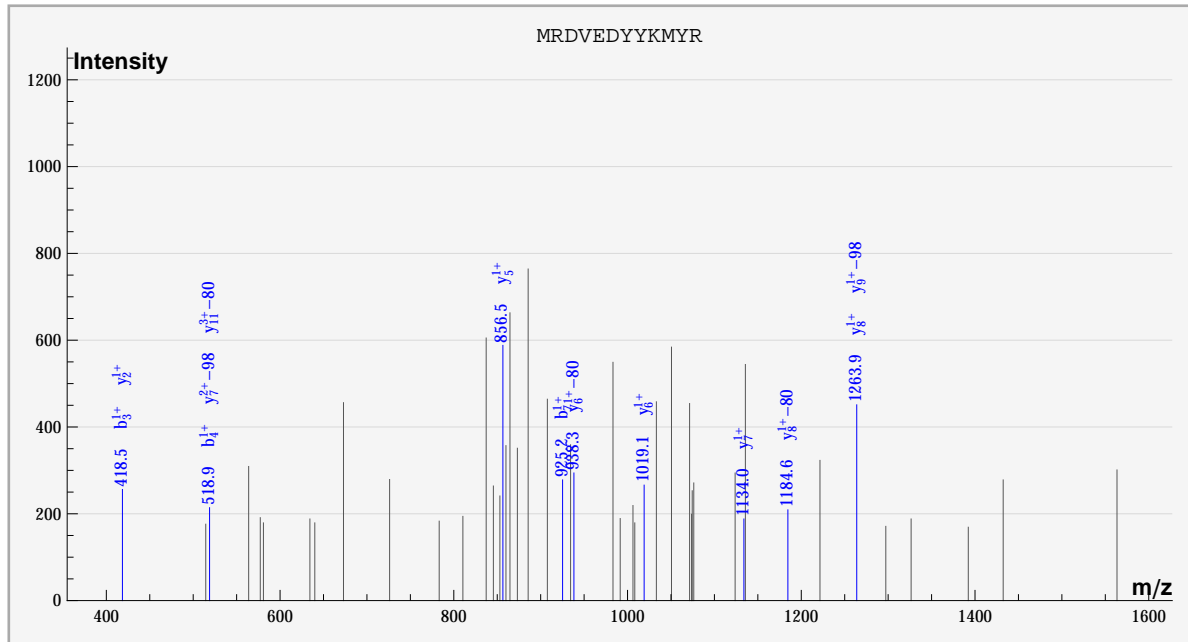

|   | #  | b | b* | #  | y | y* | P | P* |
|---|----|---|----|----|---|----|---|----|
| M | 1  |   |    |    |   |    |   |    |
| R | 2  |   |    | 11 |   | ✓  |   |    |
| D | 3  | ✓ |    | 10 |   |    |   |    |
| V | 4  | ✓ |    | 9  |   | ✓  |   |    |
| E | 5  |   |    | 8  | ✓ | ✓  |   |    |
| D | 6  |   |    | 7  | ✓ | ✓  |   |    |
| Y | 7  | ✓ |    | 6  | ✓ | ✓  |   |    |
| Y | 8  |   |    | 5  | ✓ |    |   |    |
| K | 9  |   |    | 4  |   |    |   |    |
| M | 10 |   |    | 3  |   |    |   |    |
| Y | 11 |   |    | 2  | ✓ |    |   |    |
| R | 12 |   |    | 1  |   |    |   |    |

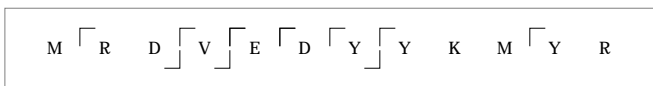

dbValid true EKELIDYHEEYLK PHOS(1) 2. 893. 1.9082 5.31972 100. ? 2490.  
 S\_Acido\_new%gi|68566552|gb|AAY79481.1| EKELIDYHEEYLK%:::PHOS:::sample\_2%compd\_999

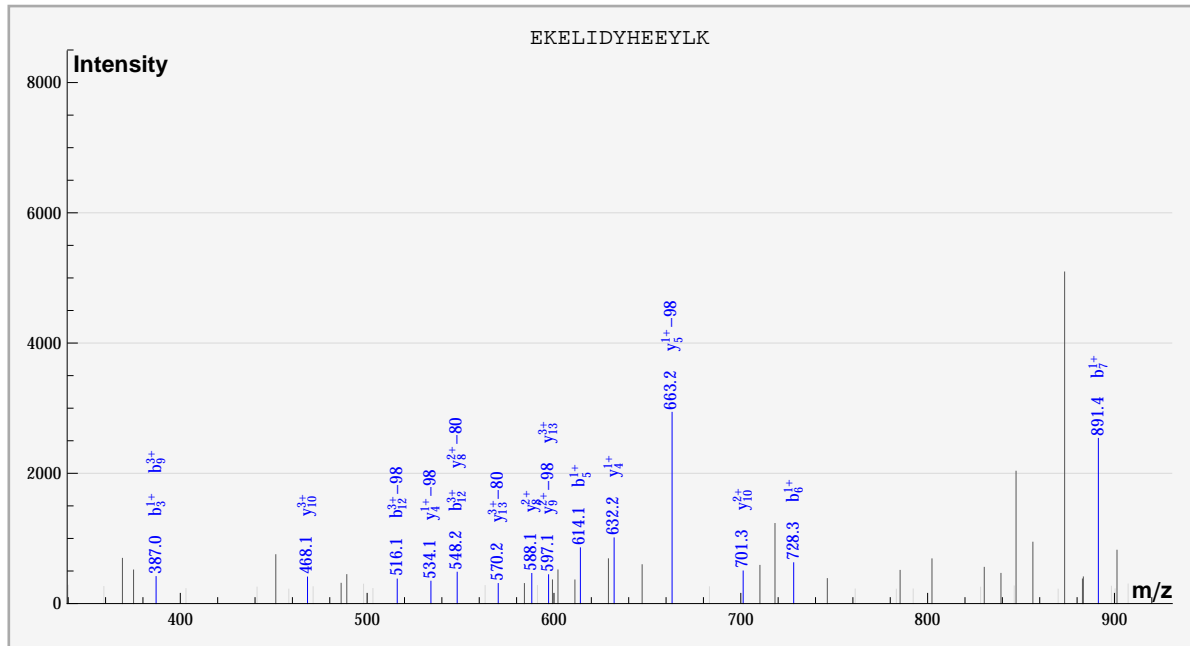

|   | #  | b | b* | #  | y | y* | P | P* |
|---|----|---|----|----|---|----|---|----|
| E | 1  |   |    |    |   |    | ✓ | ✓  |
| K | 2  |   |    | 12 |   |    |   |    |
| E | 3  | ✓ |    | 11 |   |    |   |    |
| L | 4  |   |    | 10 | ✓ |    |   |    |
| I | 5  | ✓ |    | 9  |   | ✓  |   |    |
| D | 6  | ✓ |    | 8  | ✓ | ✓  |   |    |
| Y | 7  | ✓ |    | 7  |   |    |   |    |
| H | 8  |   |    | 6  |   |    |   |    |
| E | 9  | ✓ |    | 5  |   | ✓  |   |    |
| E | 10 |   |    | 4  | ✓ | ✓  |   |    |
| Y | 11 |   |    | 3  |   |    |   |    |
| L | 12 | ✓ | ✓  | 2  |   |    |   |    |
| K | 13 |   |    | 1  |   |    |   |    |

[ E K E ] [ L ] [ I ] [ D ] [ Y ] [ H ] [ E ] [ E ] [ Y ] [ L ] [ K ]



dbValid true EKELIDYHEEYLK PHOS(1) 2. 893. 1.9082 5.31799 100. ? 2502.

S\_Acido\_new%gi|68566552|gb|AA79481.1| EKELIDYHEEYLK%:.....:PHOS::%sample\_2%cmpd\_1008

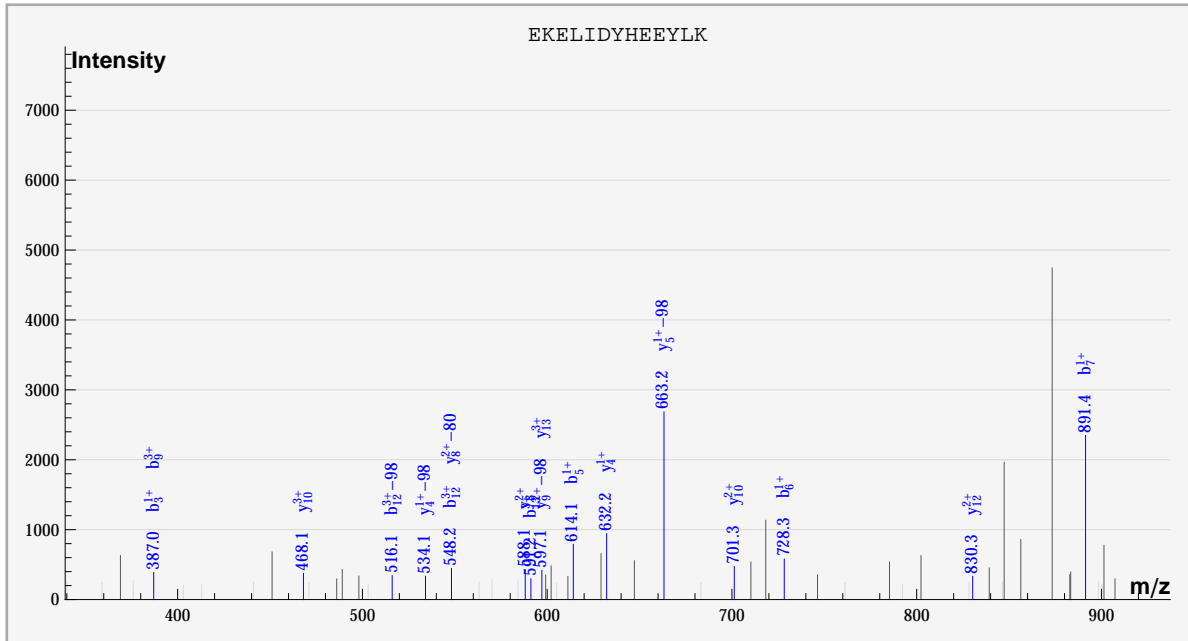

|   | #  | b | b* | #  | y | y* | P | P* |
|---|----|---|----|----|---|----|---|----|
| E | 1  |   |    |    |   |    |   | ✓  |
| K | 2  |   |    | 12 | ✓ |    |   |    |
| E | 3  | ✓ |    | 11 |   |    |   |    |
| L | 4  |   |    | 10 | ✓ |    |   |    |
| I | 5  | ✓ |    | 9  |   | ✓  |   |    |
| D | 6  | ✓ |    | 8  | ✓ | ✓  |   |    |
| Y | 7  | ✓ |    | 7  |   |    |   |    |
| H | 8  |   |    | 6  |   |    |   |    |
| E | 9  | ✓ |    | 5  |   | ✓  |   |    |
| E | 10 |   |    | 4  | ✓ | ✓  |   |    |
| Y | 11 |   |    | 3  |   |    |   |    |
| L | 12 | ✓ | ✓  | 2  |   |    |   |    |
| K | 13 | ✓ |    | 1  |   |    |   |    |

[ E ] [ K ] [ E ] [ L ] [ I ] [ D ] [ Y ] [ H ] [ E ] [ E ] [ Y ] [ L ] [ K ]

dbValid true EKELIDYHEEYLK PHOS(1) 2. 893. 1.9082 5.5858 100. ? 2514.  
 S\_Acido\_new%gi|68566552|gb|AA79481.1| EKELIDYHEEYLK%:.....PHOS::%sample\_2%cmpd\_1017

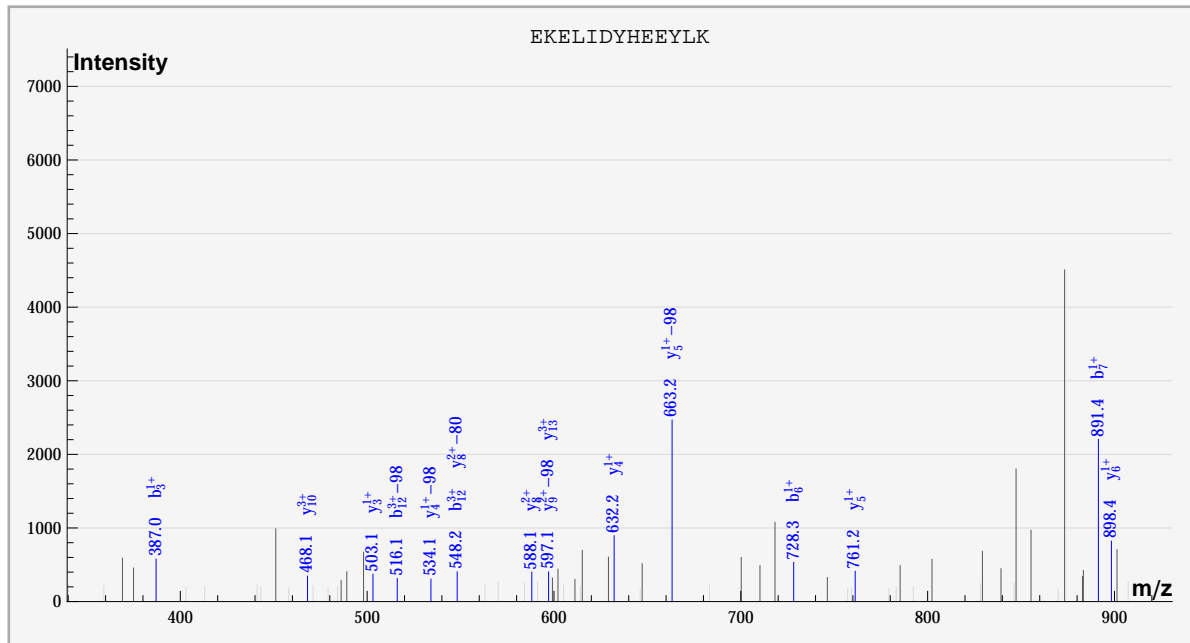

|   | #  | b | b* | #  | y | y* | P | P* |
|---|----|---|----|----|---|----|---|----|
| E | 1  |   |    |    |   |    |   | ✓  |
| K | 2  |   |    | 12 |   |    |   |    |
| E | 3  | ✓ |    | 11 |   |    |   |    |
| L | 4  |   |    | 10 | ✓ |    |   |    |
| I | 5  |   |    | 9  |   | ✓  |   |    |
| D | 6  | ✓ |    | 8  | ✓ | ✓  |   |    |
| Y | 7  | ✓ |    | 7  |   |    |   |    |
| H | 8  |   |    | 6  | ✓ |    |   |    |
| E | 9  |   |    | 5  | ✓ | ✓  |   |    |
| E | 10 |   |    | 4  | ✓ | ✓  |   |    |
| Y | 11 |   |    | 3  | ✓ |    |   |    |
| L | 12 | ✓ | ✓  | 2  |   |    |   |    |
| K | 13 |   |    | 1  |   |    |   |    |

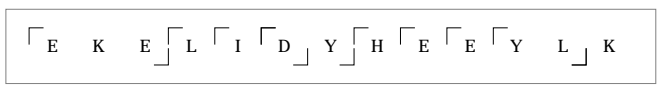

dbValid true IPEIKTL PHOS(1) 1. 895. -1.52568 5.56429 100. ? 3132.

S\_Acido\_new%gi68567864|gb|AAY80793.1| IPEIKTL%:::PHOS::%sample\_2%compd\_1493

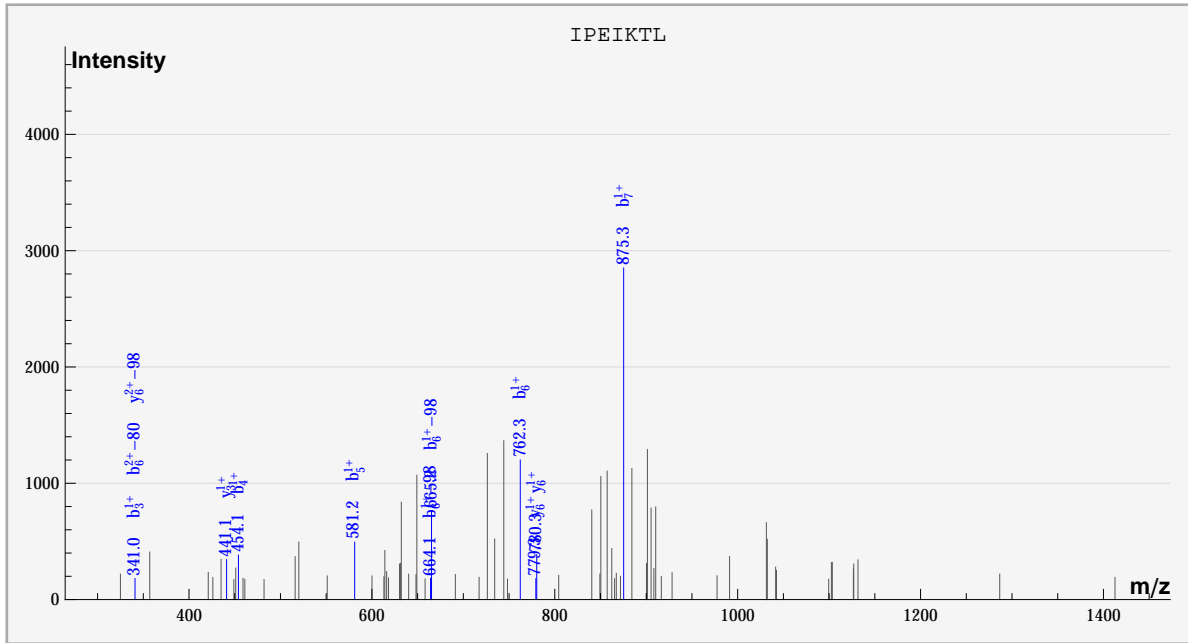

|   | # | b | b* | # | y | y* | P | P* |
|---|---|---|----|---|---|----|---|----|
| I | 1 |   |    |   |   |    |   |    |
| P | 2 |   |    | 6 | ✓ | ✓  |   |    |
| E | 3 | ✓ |    | 5 |   |    |   |    |
| I | 4 | ✓ |    | 4 |   |    |   |    |
| K | 5 | ✓ |    | 3 | ✓ |    |   |    |
| T | 6 | ✓ | ✓  | 2 |   |    |   |    |
| L | 7 | ✓ |    | 1 |   |    |   |    |

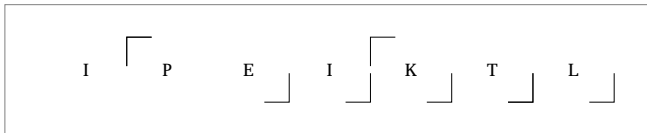

dbValid true IPEIKTL PHOS(1) 1. 895. -1.52568 5.15779 100. ? 3144.

S\_Acido\_new%gi68567864|gb|AAY80793.1| IPEIKTL%:::PHOS::%sample\_2%compd\_1503

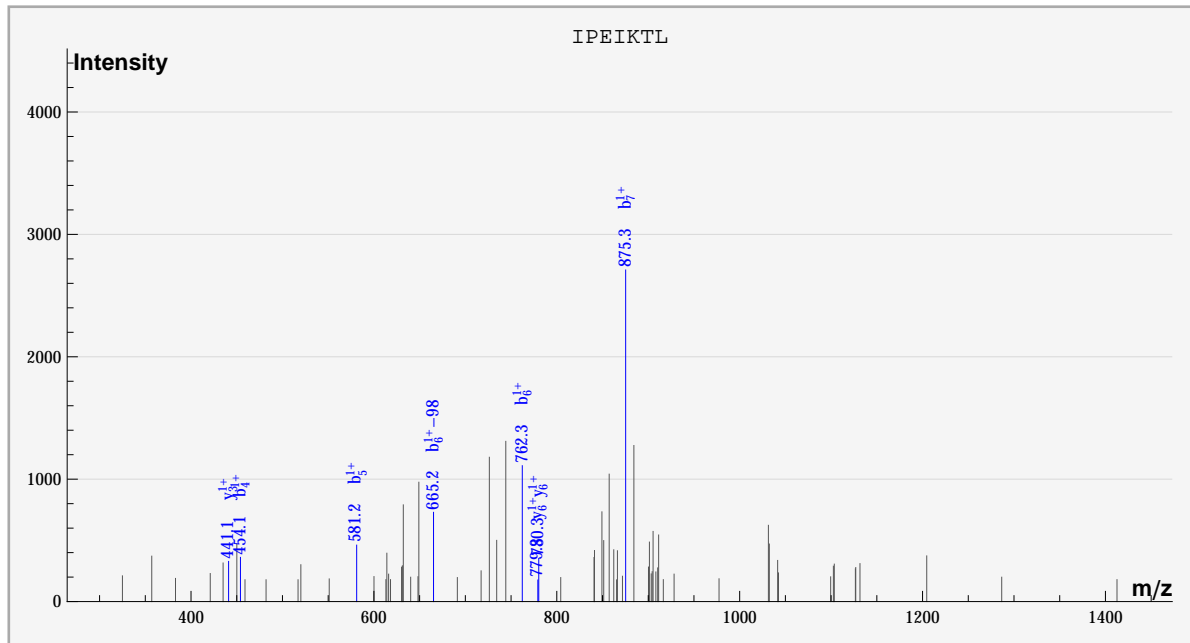

|   | # | b | b* | # | y | y* | P | P* |
|---|---|---|----|---|---|----|---|----|
| I | 1 |   |    |   |   |    |   |    |
| P | 2 |   |    | 6 | ✓ |    |   |    |
| E | 3 |   |    | 5 |   |    |   |    |
| I | 4 | ✓ |    | 4 |   |    |   |    |
| K | 5 | ✓ |    | 3 | ✓ |    |   |    |
| T | 6 | ✓ | ✓  | 2 |   |    |   |    |
| L | 7 | ✓ |    | 1 |   |    |   |    |

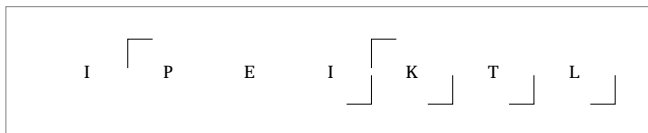

dbValid true IPEIKTL PHOS(1) 1. 895. -1.52568 5.15614 100. ? 3180.

S\_Acido\_new%gi68567864|gb|AAY80793.1| IPEIKTL%:::PHOS::%sample\_2%compd\_1533

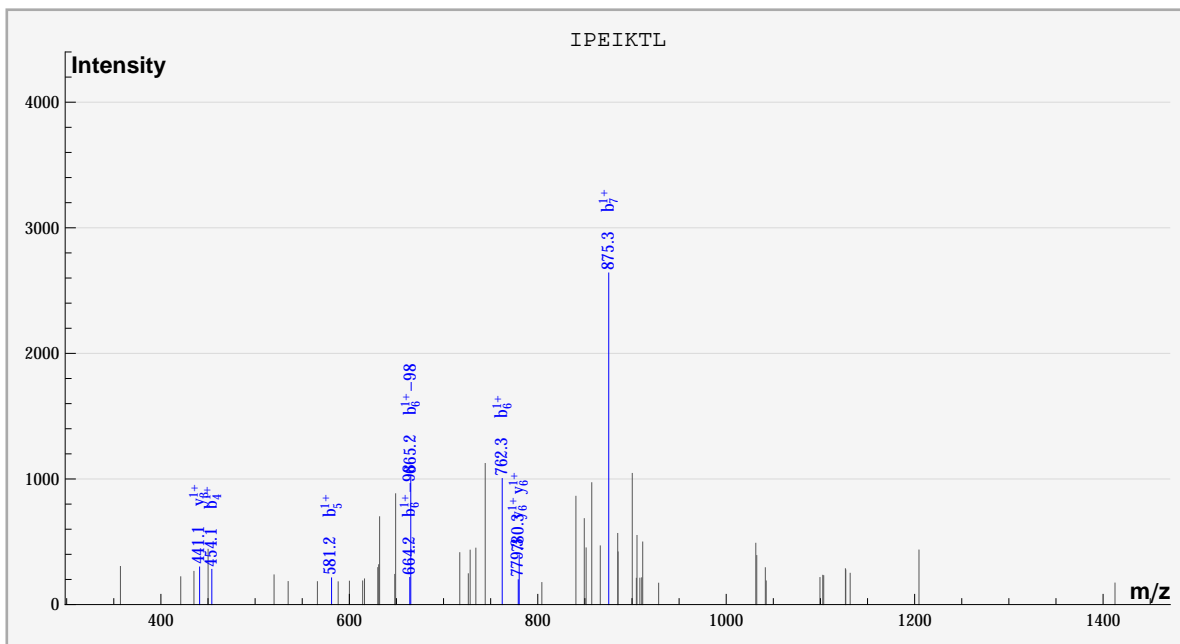

|   | # | b | b* | # | y | y* | P | P* |
|---|---|---|----|---|---|----|---|----|
| I | 1 |   |    |   |   |    |   |    |
| P | 2 |   |    | 6 | ✓ |    |   |    |
| E | 3 |   |    | 5 |   |    |   |    |
| I | 4 | ✓ |    | 4 |   |    |   |    |
| K | 5 | ✓ |    | 3 | ✓ |    |   |    |
| T | 6 | ✓ | ✓  | 2 |   |    |   |    |
| L | 7 | ✓ |    | 1 |   |    |   |    |

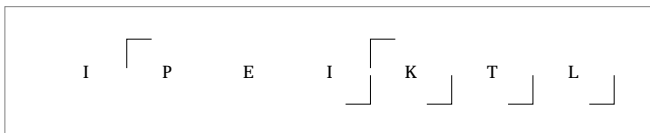

dbValid true IPEIKTL PHOS(1) 1. 895. -1.52568 5.34638 100. ? 3204.

S\_Acido\_new%gi|68567864|gb|AAY80793.1| IPEIKTL%::::::PHOS::%sample\_2%compd\_1551

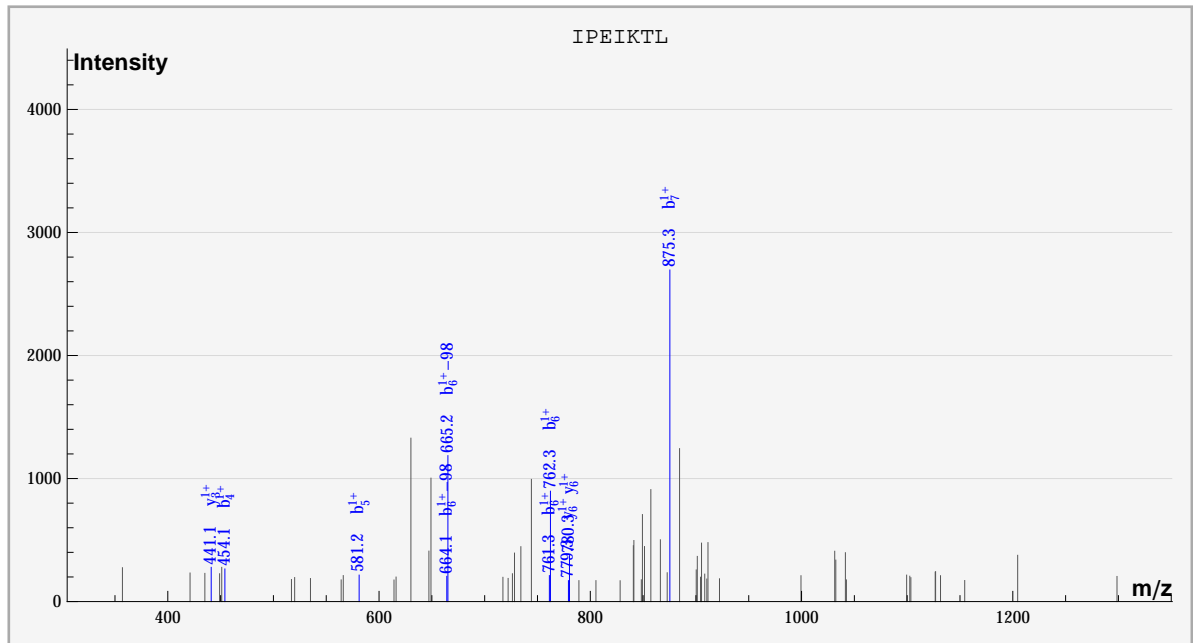

|   | # | b | b* | # | y | y* | P | P* |
|---|---|---|----|---|---|----|---|----|
| I | 1 |   |    |   |   |    |   |    |
| P | 2 |   |    | 6 | ✓ |    |   |    |
| E | 3 |   |    | 5 |   |    |   |    |
| I | 4 | ✓ |    | 4 |   |    |   |    |
| K | 5 | ✓ |    | 3 | ✓ |    |   |    |
| T | 6 | ✓ | ✓  | 2 |   |    |   |    |
| L | 7 | ✓ |    | 1 |   |    |   |    |



dbValid true SFVSSNLAMAIAASGRK PHOS(1) 2. 896. -0.563058 5.45631 100. ? 2124.  
 S\_Acido\_new%gi|68566927|gb|AA79856.1| SFVSSNLAMAIAASGRK%:PHOS:::.....%sample\_3%compd\_802

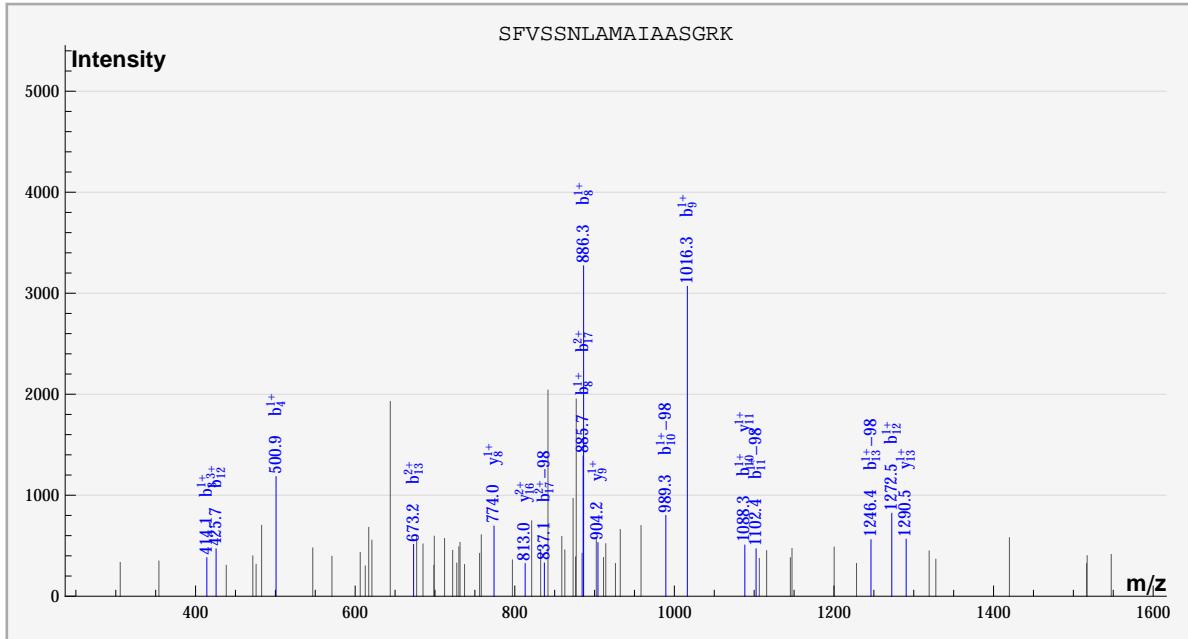

|   | #  | b | b* | #  | y | y* | P | P* |
|---|----|---|----|----|---|----|---|----|
| S | 1  |   |    |    |   |    |   |    |
| F | 2  |   |    | 16 | ✓ |    |   |    |
| V | 3  | ✓ |    | 15 |   |    |   |    |
| S | 4  | ✓ |    | 14 |   |    |   |    |
| S | 5  |   |    | 13 | ✓ |    |   |    |
| N | 6  |   |    | 12 |   |    |   |    |
| L | 7  |   |    | 11 | ✓ |    |   |    |
| A | 8  | ✓ |    | 10 |   |    |   |    |
| M | 9  | ✓ |    | 9  | ✓ |    |   |    |
| A | 10 | ✓ | ✓  | 8  | ✓ |    |   |    |
| I | 11 |   | ✓  | 7  |   |    |   |    |
| A | 12 | ✓ |    | 6  |   |    |   |    |
| A | 13 | ✓ | ✓  | 5  |   |    |   |    |
| S | 14 |   |    | 4  |   |    |   |    |
| G | 15 |   |    | 3  |   |    |   |    |
| R | 16 |   |    | 2  |   |    |   |    |
| K | 17 | ✓ | ✓  | 1  |   |    |   |    |

S F V S S N L A M A I A A S G R K

dbValid true EYTKLAITYSRK PHOS(4) 2. 896. 0.841617 5.12364 100. ? 3180.

S\_Acido\_new%gi|68566534|gb|AA79463.1| EYTKLAITYSRK::PHOS:PHOS:::PHOS:PHOS:::sample\_3%compd\_1768

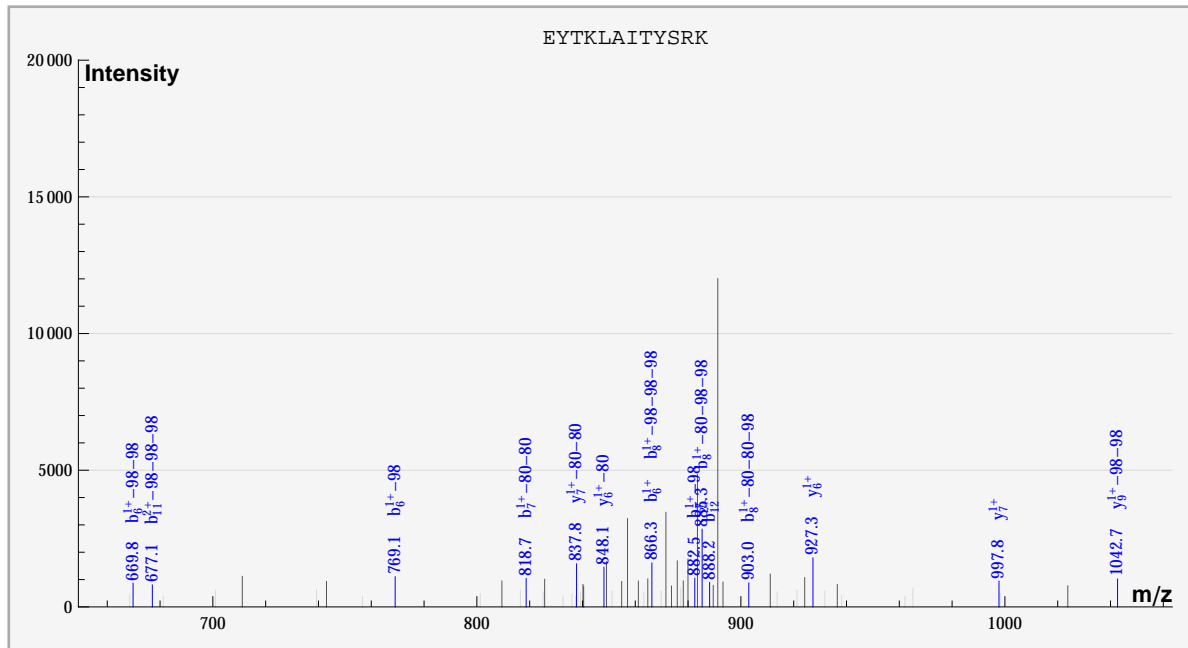

|   | #  | b | b* | #  | y | y* | P | P* |
|---|----|---|----|----|---|----|---|----|
| E | 1  |   |    |    |   |    |   |    |
| Y | 2  |   |    | 11 |   |    |   |    |
| T | 3  |   |    | 10 |   |    |   |    |
| K | 4  |   |    | 9  |   | ✓  |   |    |
| L | 5  |   |    | 8  |   |    |   |    |
| A | 6  | ✓ | ✓  | 7  | ✓ | ✓  |   |    |
| I | 7  |   | ✓  | 6  | ✓ | ✓  |   |    |
| T | 8  |   | ✓  | 5  |   |    |   |    |
| Y | 9  |   |    | 4  |   |    |   |    |
| S | 10 |   |    | 3  |   |    |   |    |
| R | 11 |   | ✓  | 2  |   |    |   |    |
| K | 12 | ✓ |    | 1  |   |    |   |    |

E Y T K L A I T Y S R K



dbValid true KMIAYIAGMTAPREK Oxidation\_M(2),PHOS(1) 2. 896.  
 0.430257 5.34409 100. ? 3522. S\_Acido\_new%gi68567681|gb|AAY80610.1|  
 KMIAYIAGMTAPREK%::Oxidation\_M::PHOS:::Oxidation\_M:::sample\_3%compd\_2078

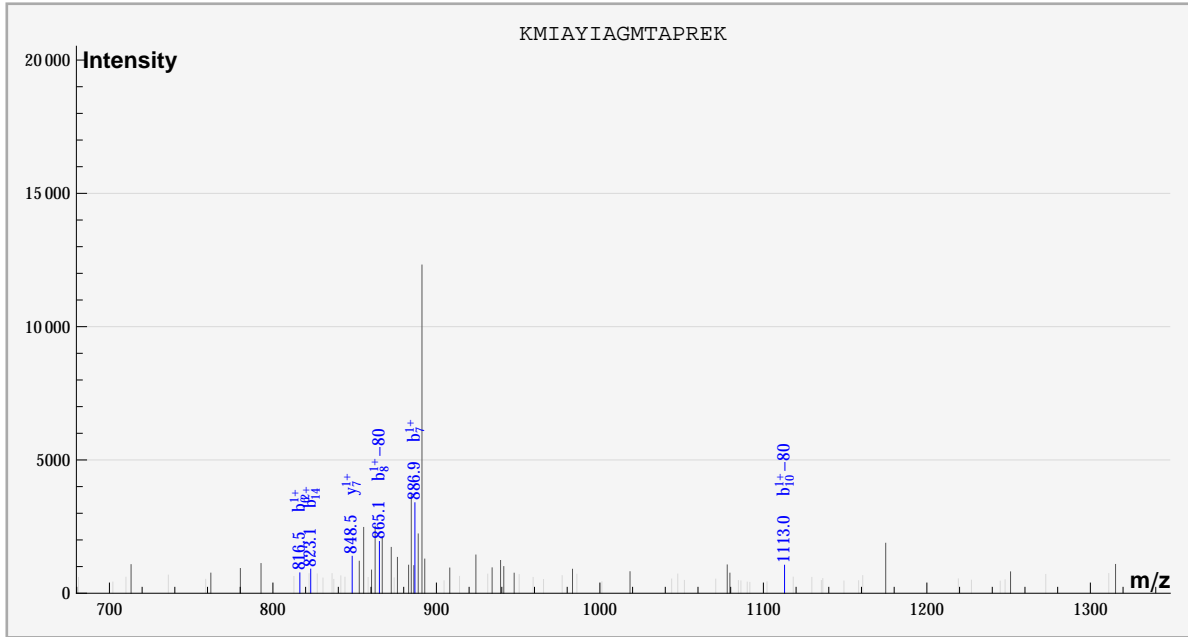

|   | #  | b | b* | #  | y | y* | P | P* |
|---|----|---|----|----|---|----|---|----|
| K | 1  |   |    |    |   |    |   |    |
| M | 2  |   |    | 14 |   |    |   |    |
| I | 3  |   |    | 13 |   |    |   |    |
| A | 4  |   |    | 12 |   |    |   |    |
| Y | 5  |   |    | 11 |   |    |   |    |
| I | 6  | ✓ |    | 10 |   |    |   |    |
| A | 7  | ✓ |    | 9  |   |    |   |    |
| G | 8  |   | ✓  | 8  |   |    |   |    |
| M | 9  |   |    | 7  | ✓ |    |   |    |
| T | 10 |   | ✓  | 6  |   |    |   |    |
| A | 11 |   |    | 5  |   |    |   |    |
| P | 12 |   |    | 4  |   |    |   |    |
| R | 13 |   |    | 3  |   |    |   |    |
| E | 14 | ✓ |    | 2  |   |    |   |    |
| K | 15 |   |    | 1  |   |    |   |    |

K M I A Y I A G M T A P R E K

dbValid true YLTQYLNKIDKTK PHOS(2) 2. 896. -1.57737 5.2142 100. ? 3654.

S\_Acido\_new%gi|68567092|gb|AA80021.1| YLTQYLNKIDKTK%:PHOS::PHOS:::.....:sample\_3%compd\_2202

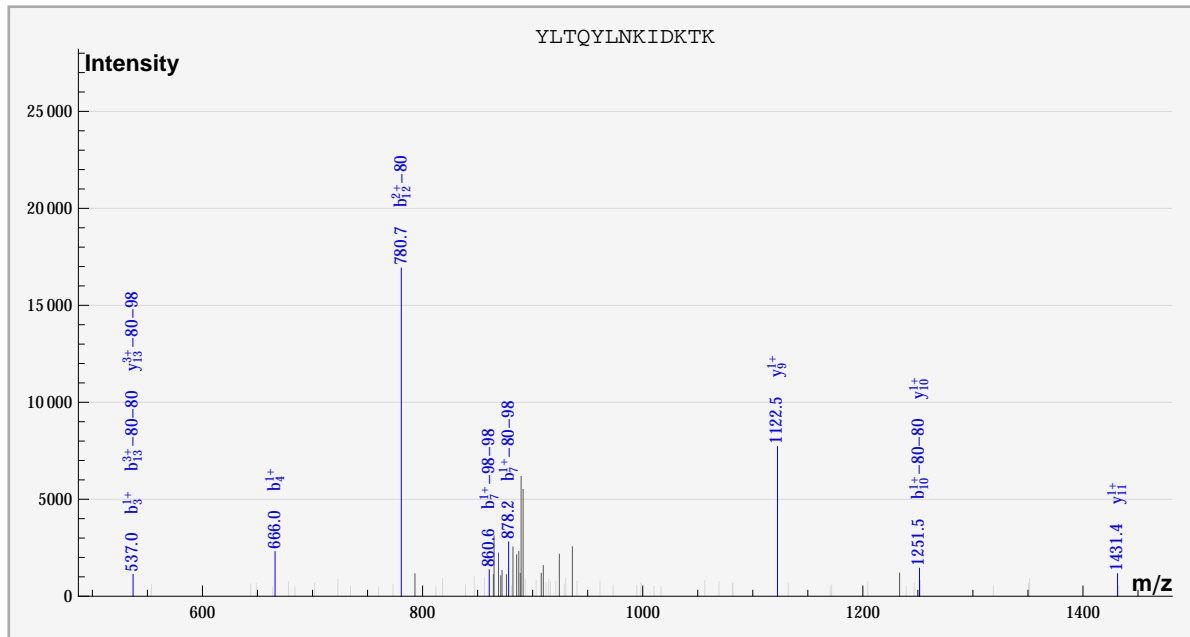

|   | #  | b | b* | #  | y | y* | P | P* |
|---|----|---|----|----|---|----|---|----|
| Y | 1  |   |    |    |   |    |   | ✓  |
| L | 2  |   |    | 12 |   |    |   |    |
| T | 3  | ✓ |    | 11 | ✓ |    |   |    |
| Q | 4  | ✓ |    | 10 | ✓ |    |   |    |
| Y | 5  |   |    | 9  | ✓ |    |   |    |
| L | 6  |   |    | 8  |   |    |   |    |
| N | 7  |   | ✓  | 7  |   |    |   |    |
| K | 8  |   |    | 6  |   |    |   |    |
| I | 9  |   |    | 5  |   |    |   |    |
| D | 10 | ✓ |    | 4  |   |    |   |    |
| K | 11 |   |    | 3  |   |    |   |    |
| T | 12 | ✓ |    | 2  |   |    |   |    |
| K | 13 | ✓ |    | 1  |   |    |   |    |

[Y L [T [Q [Y L N ] K I D ] K T ] K ]

dbValid true KTTRTK PHOS(2) 1. 896. -1.61548 5.07785 100. ? 4662.  
 S\_Acido\_new%gi|68567858|gb|AAY80787.1| KTTRTK%:::PHOS::PHOS::%sample\_3%cmpd\_3121

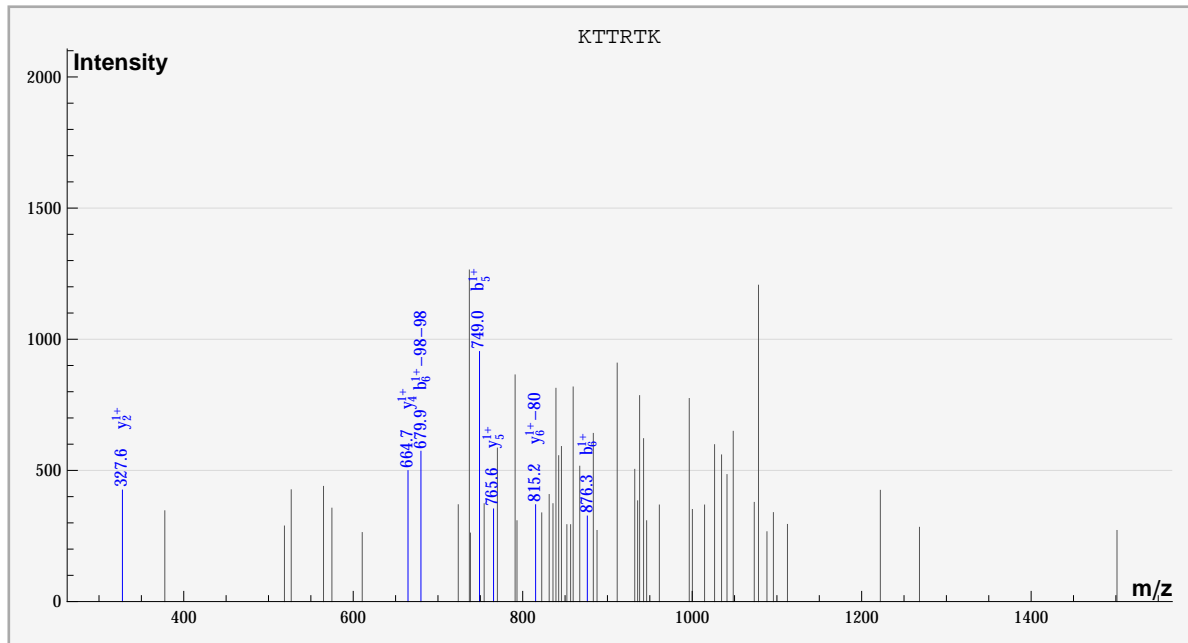

|   | # | b | b* | # | y | y* | P | P* |
|---|---|---|----|---|---|----|---|----|
| K | 1 |   |    |   |   |    |   | ✓  |
| T | 2 |   |    | 5 | ✓ |    |   |    |
| T | 3 |   |    | 4 | ✓ |    |   |    |
| R | 4 |   |    | 3 |   |    |   |    |
| T | 5 | ✓ |    | 2 | ✓ |    |   |    |
| K | 6 | ✓ | ✓  | 1 |   |    |   |    |

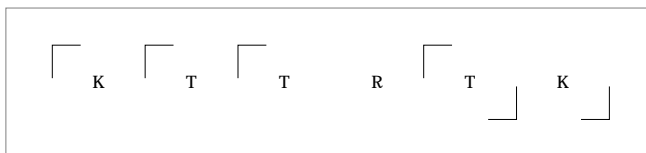

dbValid true TLDYPK PHOS(2) 1. 897. -0.679815 5.06913 100. ? 684.  
 S\_Acido\_new%gi|68568512|gb|AAY81441.1| TLDYPK%:PHOS:::PHOS:::sample\_3%compd\_3906

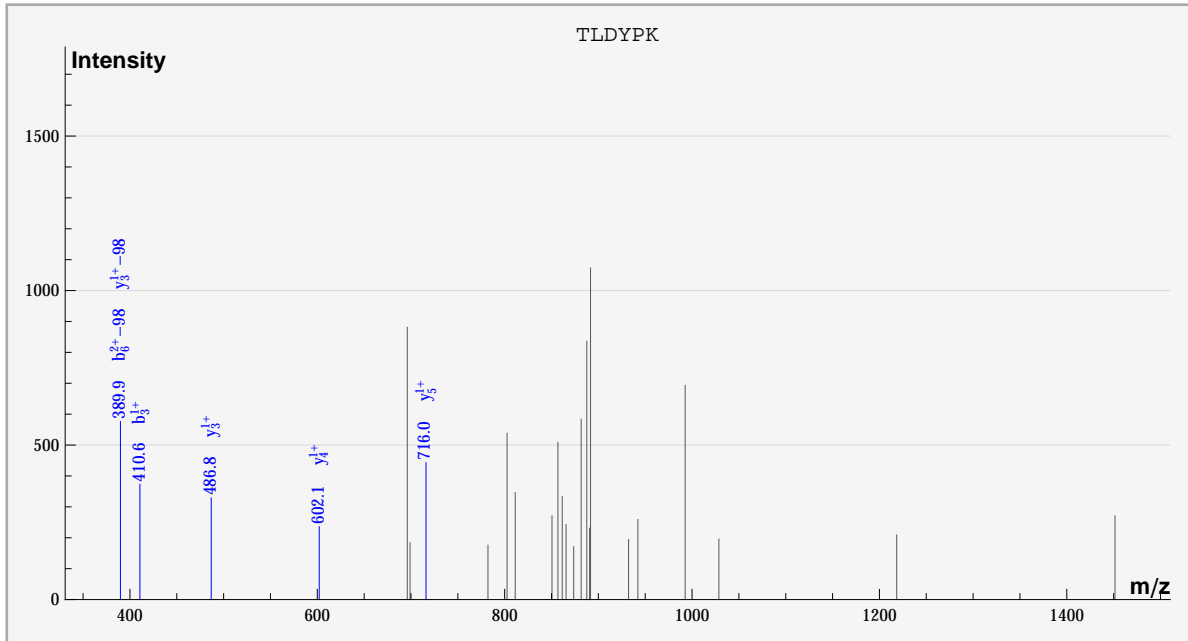

|   | # | b | b* | # | y | y* | P | P* |
|---|---|---|----|---|---|----|---|----|
| T | 1 |   |    |   |   |    |   |    |
| L | 2 |   |    | 5 | ✓ |    |   |    |
| D | 3 | ✓ |    | 4 | ✓ |    |   |    |
| Y | 4 |   |    | 3 | ✓ | ✓  |   |    |
| P | 5 |   |    | 2 |   |    |   |    |
| K | 6 |   | ✓  | 1 |   |    |   |    |

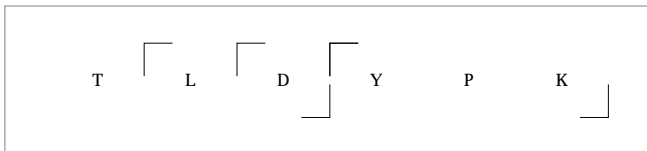

dbValid true YMSWSK Oxidation\_M(1),PHOS(1) 1. 898. -0.678795 5.50375 100. ? 1368.  
 S\_Acido\_new%gi|68567144|gb|AAY80073.1| YMSWSK%:PHOS:Oxidation\_M::::%sample\_2%compd\_109

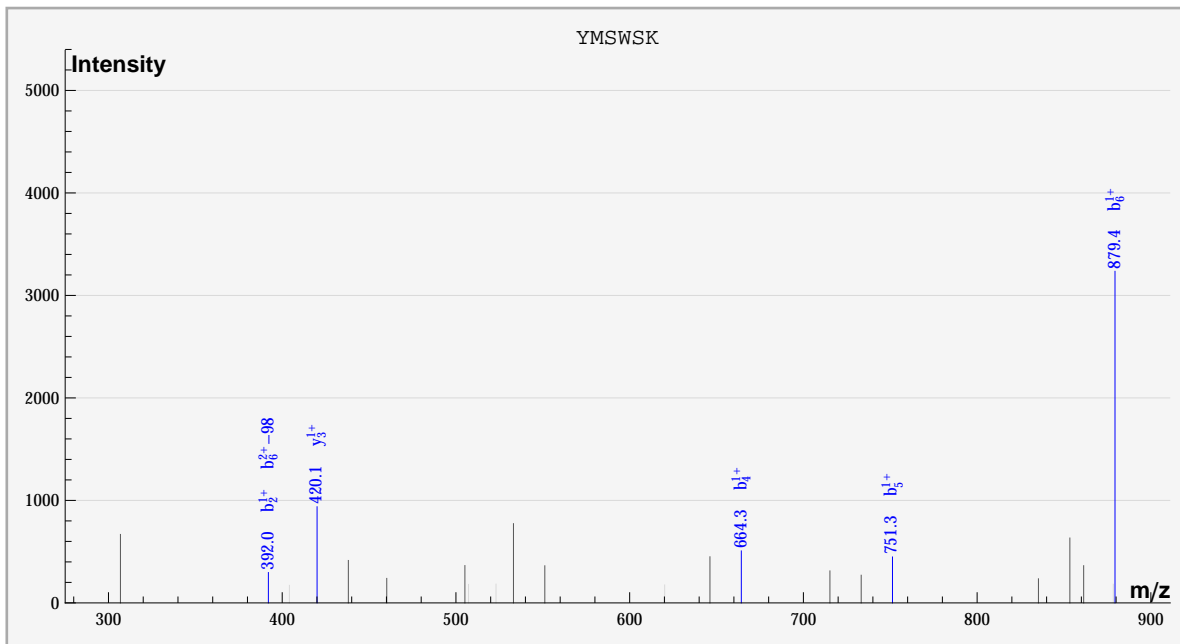

|   | # | b | b* | # | y | y* | P | P* |
|---|---|---|----|---|---|----|---|----|
| Y | 1 |   |    |   |   |    |   |    |
| M | 2 | ✓ |    | 5 |   |    |   |    |
| S | 3 |   |    | 4 |   |    |   |    |
| W | 4 | ✓ |    | 3 | ✓ |    |   |    |
| S | 5 | ✓ |    | 2 |   |    |   |    |
| K | 6 | ✓ | ✓  | 1 |   |    |   |    |

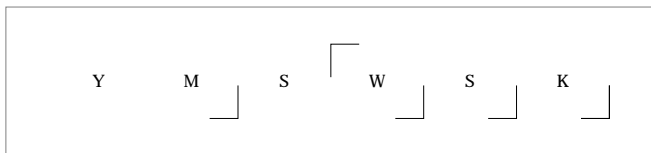

dbValid true YMSWSK Oxidation\_M(1),PHOS(1) 1. 898. -0.678795 5.2816 100. ? 1380.  
 S\_Acido\_new%gil68567144|gb|AAY80073.1| YMSWSK%:PHOS:Oxidation\_M::::%sample\_2%compd\_119

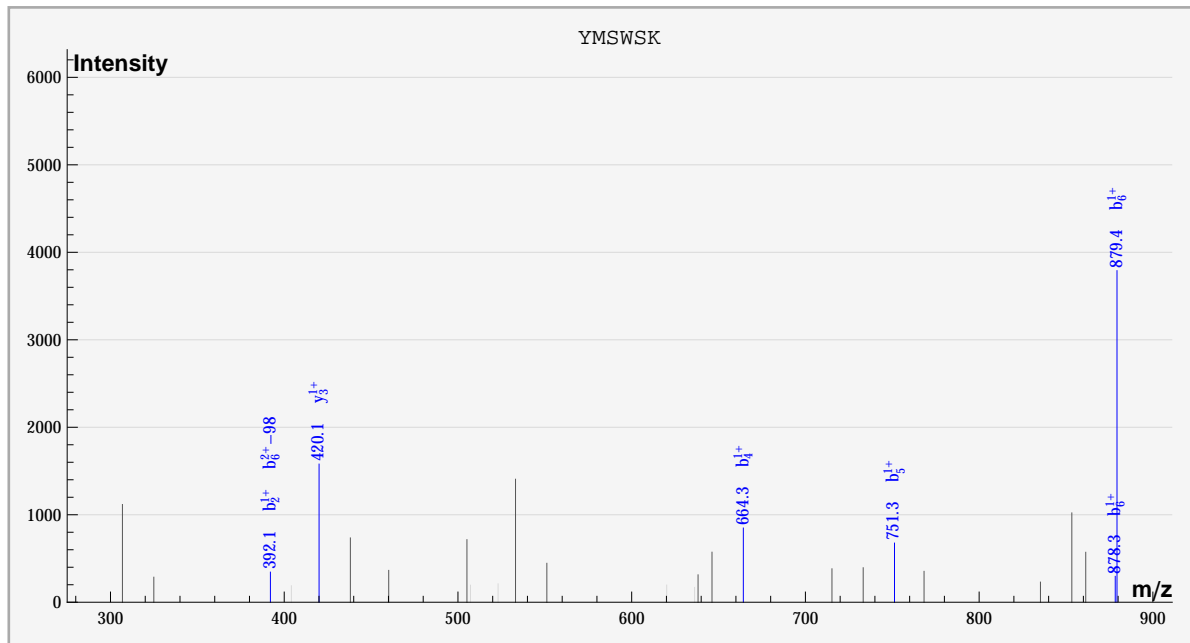

|   | # | b | b* | # | y | y* | P | P* |
|---|---|---|----|---|---|----|---|----|
| Y | 1 |   |    |   |   |    |   |    |
| M | 2 | ✓ |    | 5 |   |    |   |    |
| S | 3 |   |    | 4 |   |    |   |    |
| W | 4 | ✓ |    | 3 | ✓ |    |   |    |
| S | 5 | ✓ |    | 2 |   |    |   |    |
| K | 6 | ✓ | ✓  | 1 |   |    |   |    |

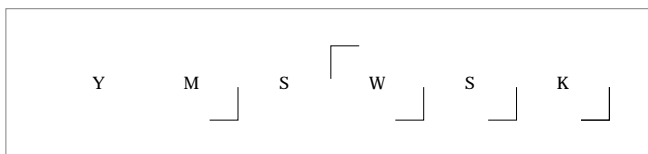

dbValid true YMSWSK Oxidation\_M(1),PHOS(1) 1. 898. -0.678795 5.1796 100. ? 1392.  
 S\_Acido\_new%gil68567144|gb|AAY80073.1| YMSWSK%:PHOS:Oxidation\_M::::%sample\_2%cmpd\_128

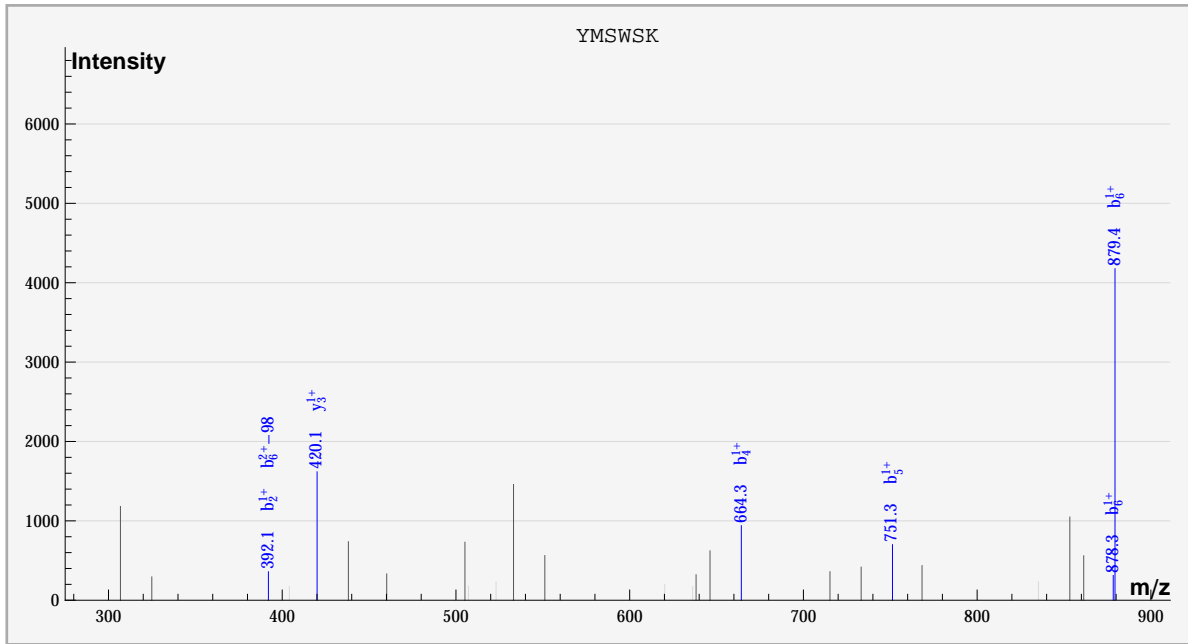

|   | # | b | b* | # | y | y* | P | P* |
|---|---|---|----|---|---|----|---|----|
| Y | 1 |   |    |   |   |    |   |    |
| M | 2 | ✓ |    | 5 |   |    |   |    |
| S | 3 |   |    | 4 |   |    |   |    |
| W | 4 | ✓ |    | 3 | ✓ |    |   |    |
| S | 5 | ✓ |    | 2 |   |    |   |    |
| K | 6 | ✓ | ✓  | 1 |   |    |   |    |

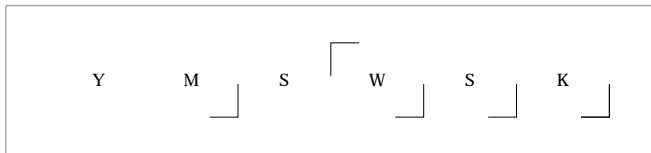

dbValid true LTYVLK PHOS(2) 1. 898. -1.60705 5.28369 100. ? 4044.  
 S\_Acido\_new%gi|68566552|gb|AA79481.1| LTYVLK%::PHOS:PHOS:::sample\_2%compd\_2238

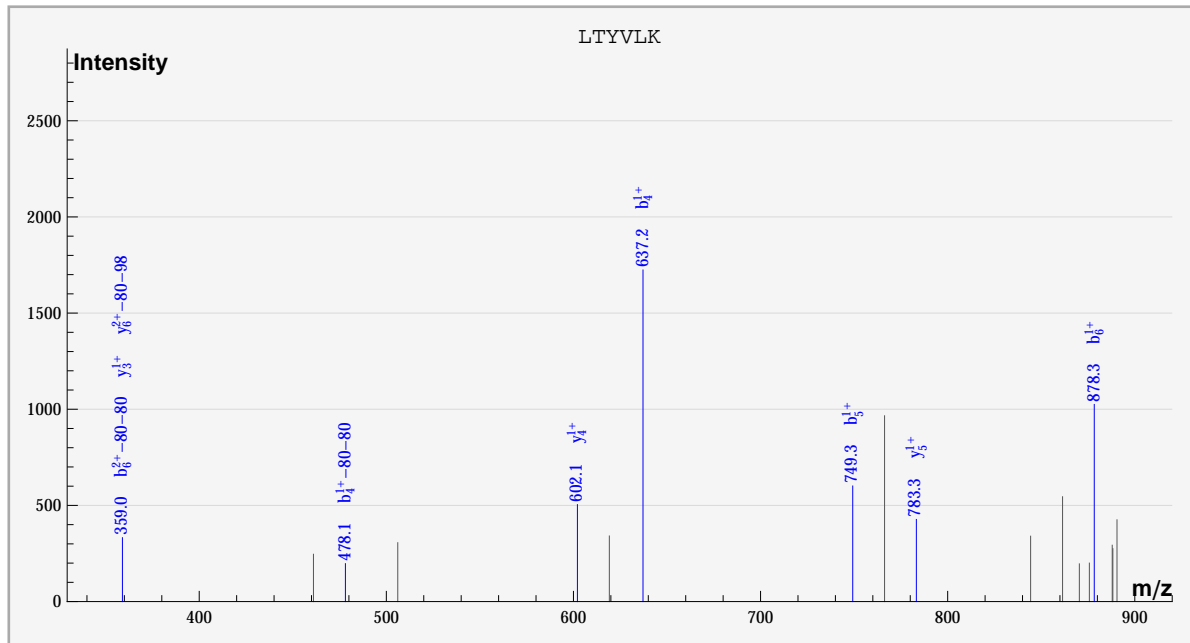

|   | # | b | b* | # | y | y* | P | P* |
|---|---|---|----|---|---|----|---|----|
| L | 1 |   |    |   |   |    |   | ✓  |
| T | 2 |   |    | 5 | ✓ |    |   |    |
| Y | 3 |   |    | 4 | ✓ |    |   |    |
| V | 4 | ✓ | ✓  | 3 | ✓ |    |   |    |
| L | 5 | ✓ |    | 2 |   |    |   |    |
| K | 6 | ✓ | ✓  | 1 |   |    |   |    |

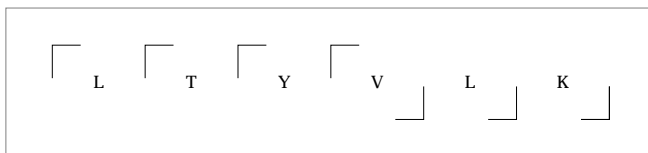



dbValid true EYYSKK PHOS(1) 1. 899. -1.62465 5.17001 100. ? 2376.  
 S\_Acido\_new%gi68568117|gb|AAY81046.1| EYYSKK%:::PHOS:::sample\_2%compd\_907

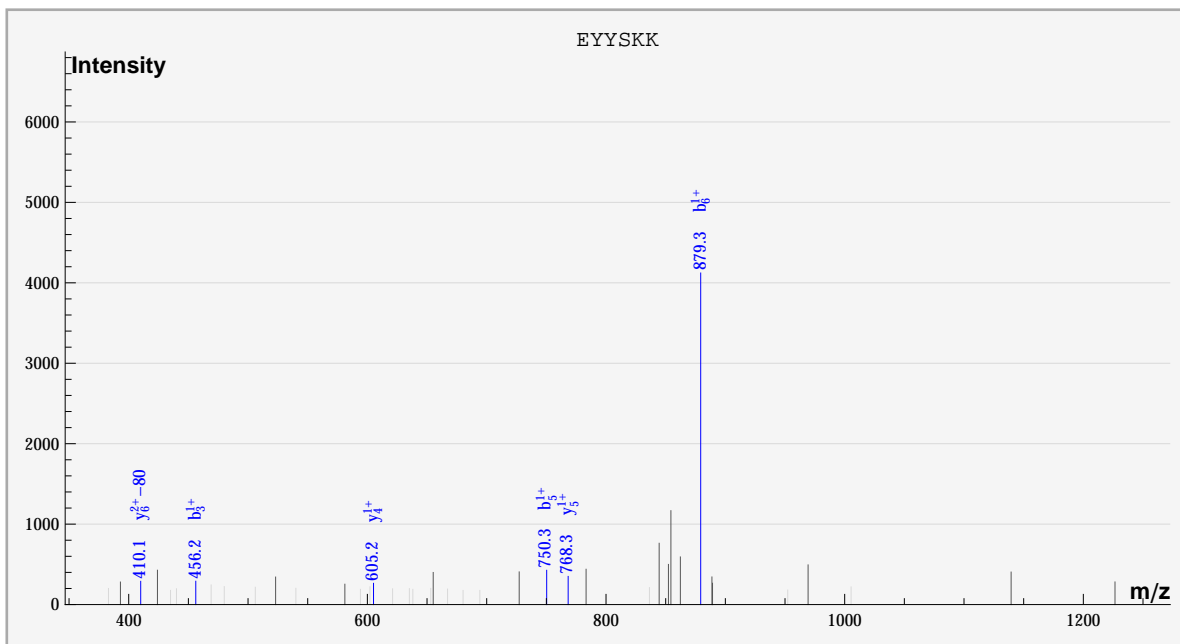

|   | # | b | b* | # | y | y* | P | P* |
|---|---|---|----|---|---|----|---|----|
| E | 1 |   |    |   |   |    |   | ✓  |
| Y | 2 |   |    | 5 | ✓ |    |   |    |
| Y | 3 | ✓ |    | 4 | ✓ |    |   |    |
| S | 4 |   |    | 3 |   |    |   |    |
| K | 5 | ✓ |    | 2 |   |    |   |    |
| K | 6 | ✓ |    | 1 |   |    |   |    |

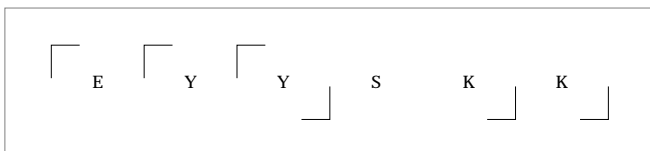

dbValid true DLNYSK PHOS(2) 1. 901. -1.7053 5.10242 100. ? 2892.  
 S\_Acido\_new%gii68567838|gb|AAY80767.1| DLNYSK%:::PHOS:PHOS::%sample\_3%cmpd\_1395

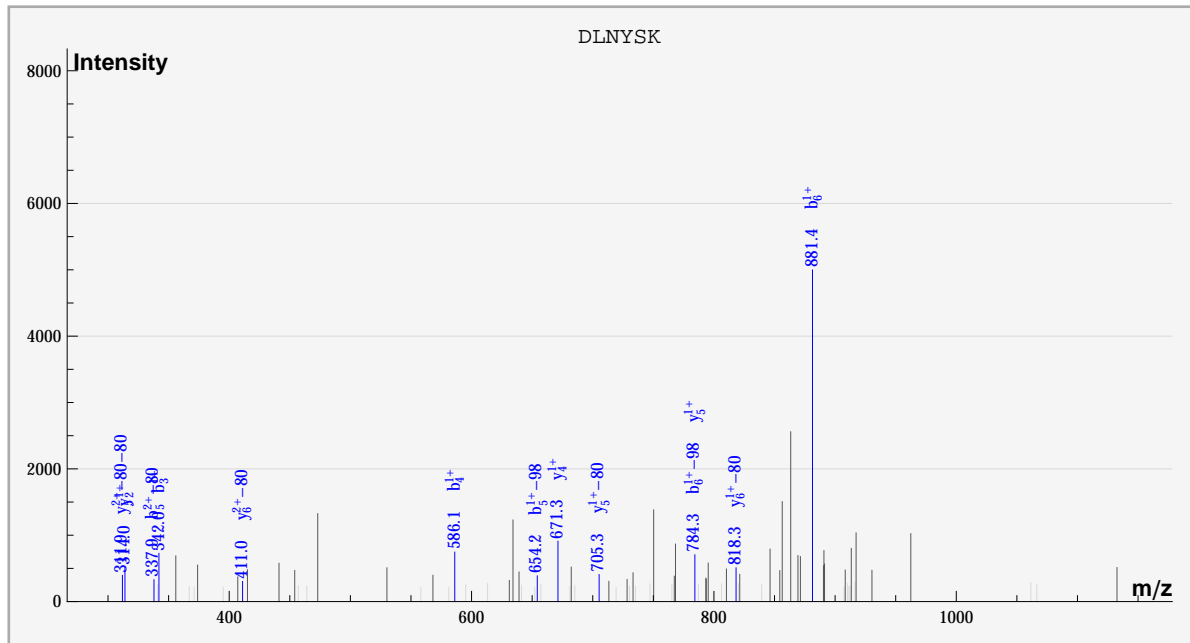

|   | # | b | b* | # | y | y* | P | P* |
|---|---|---|----|---|---|----|---|----|
| D | 1 |   |    |   |   |    |   | ✓  |
| L | 2 |   |    | 5 | ✓ | ✓  |   |    |
| N | 3 | ✓ |    | 4 | ✓ |    |   |    |
| Y | 4 | ✓ |    | 3 |   |    |   |    |
| S | 5 |   | ✓  | 2 | ✓ |    |   |    |
| K | 6 | ✓ | ✓  | 1 |   |    |   |    |

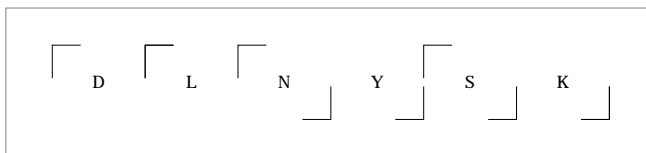

dbValid true FSQVVLK PHOS(1) 1. 902. -1.54099 5.82513 100. ? 2442.  
 S\_Acido\_new%gi|68568572|gb|AAY81501.1| FSQVVLK%::PHOS:::::sample\_3%compd\_1018

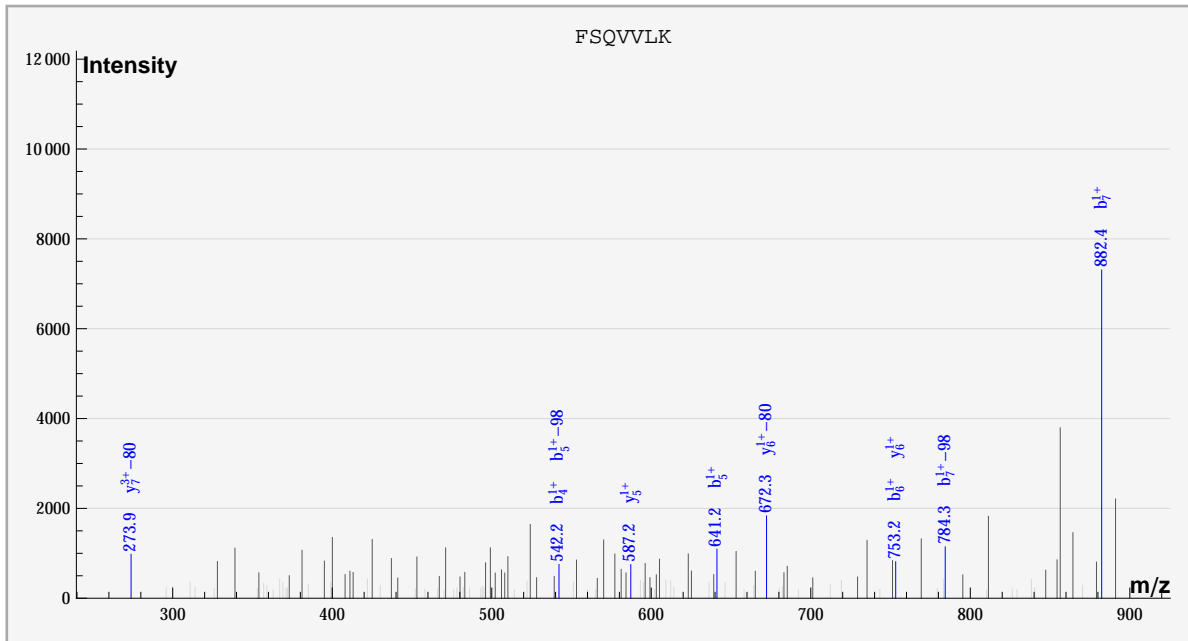

|   | # | b | b* | # | y | y* | P | P* |
|---|---|---|----|---|---|----|---|----|
| F | 1 |   |    |   |   |    |   | ✓  |
| S | 2 |   |    | 6 | ✓ | ✓  |   |    |
| Q | 3 |   |    | 5 | ✓ |    |   |    |
| V | 4 | ✓ |    | 4 |   |    |   |    |
| V | 5 | ✓ | ✓  | 3 |   |    |   |    |
| L | 6 | ✓ |    | 2 |   |    |   |    |
| K | 7 | ✓ | ✓  | 1 |   |    |   |    |

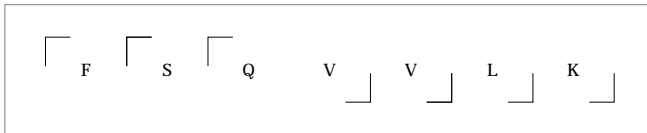

dbValid true MPMSVK Oxidation\_M(1),PHOS(1) 1. 905. -1.66487 5.19812 100. ? 3150.  
 S\_Acido\_new%gil68568712|gb|AAy81641.1| MPMSVK%:::Oxidation\_M::PHOS:::%sample\_3%compd\_1616

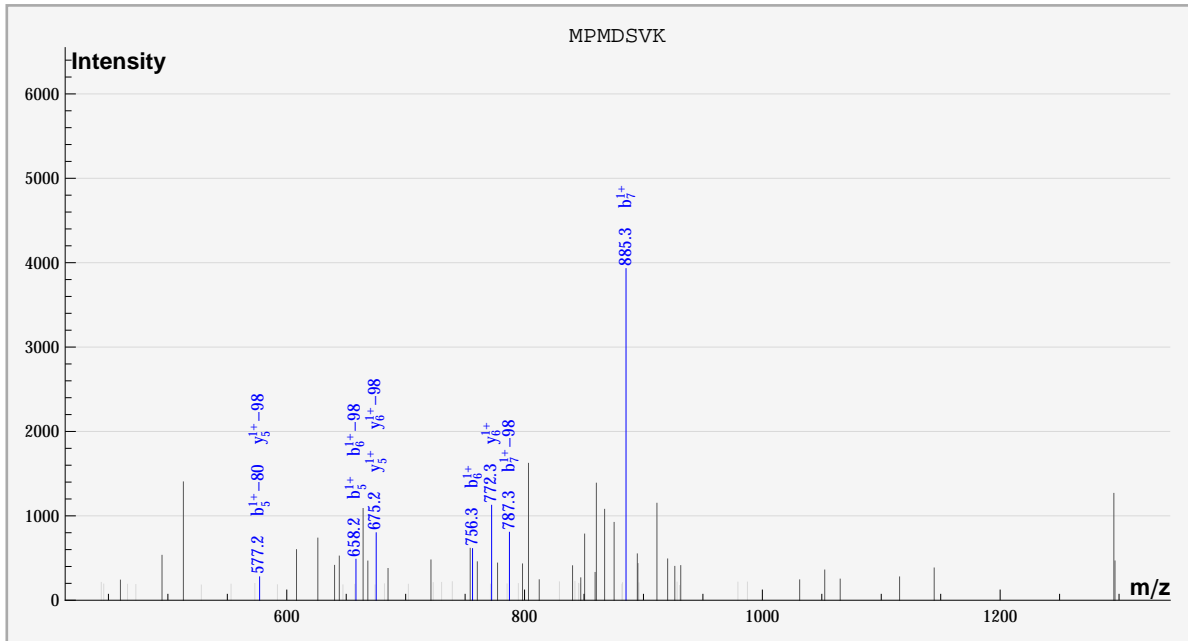

|   | # | b | b* | # | y | y* | P | P* |
|---|---|---|----|---|---|----|---|----|
| M | 1 |   |    |   |   |    |   |    |
| P | 2 |   |    | 6 | ✓ | ✓  |   |    |
| M | 3 |   |    | 5 | ✓ | ✓  |   |    |
| D | 4 |   |    | 4 |   |    |   |    |
| S | 5 | ✓ | ✓  | 3 |   |    |   |    |
| V | 6 | ✓ | ✓  | 2 |   |    |   |    |
| K | 7 | ✓ | ✓  | 1 |   |    |   |    |

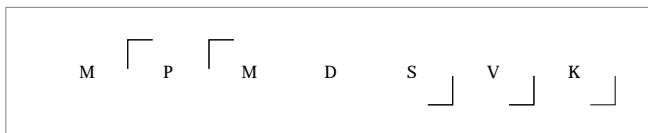

dbValid true YCKFKEYQFCEK Cys\_CAM(2),PHOS(1) 2. 905. 0.372427 5.02094 100. ? 4212.  
 S\_Acido\_new%gil68567023|gb|AA79952.1| YCKFKEYQFCEK%:PHOS:Cys\_CAM:::Cys\_CAM:::sample\_3%compd\_2527

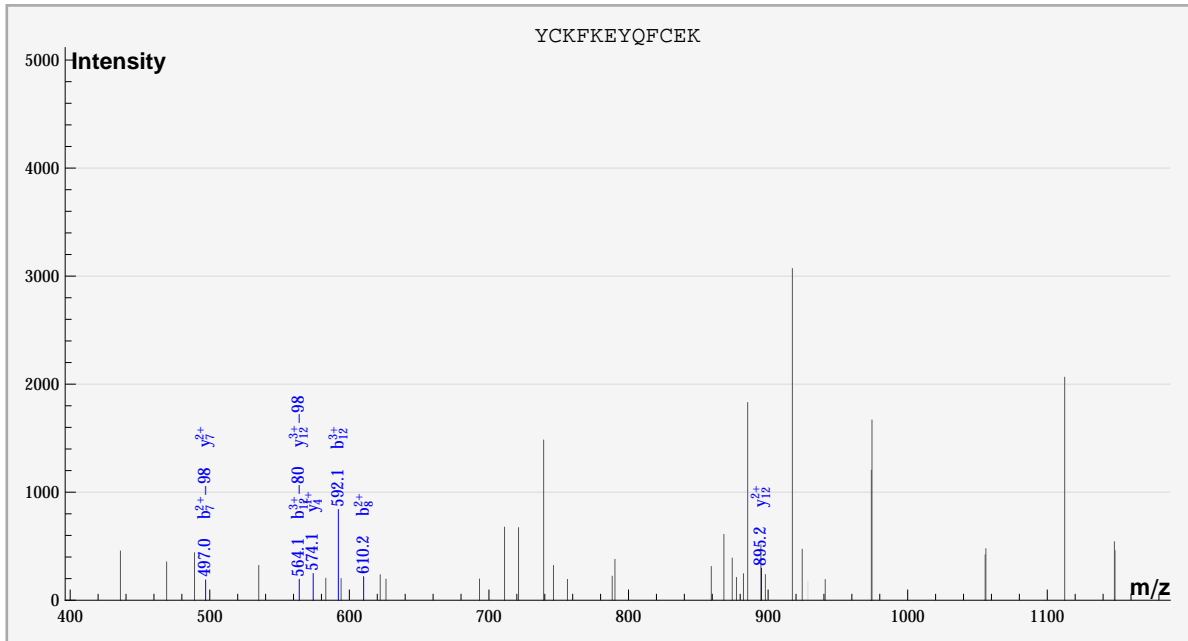

|   | #  | b | b* | #  | y | y* | P | P* |
|---|----|---|----|----|---|----|---|----|
| Y | 1  |   |    |    |   |    | ✓ | ✓  |
| C | 2  |   |    | 11 |   |    |   |    |
| K | 3  |   |    | 10 |   |    |   |    |
| F | 4  |   |    | 9  |   |    |   |    |
| K | 5  |   |    | 8  |   |    |   |    |
| E | 6  |   |    | 7  | ✓ |    |   |    |
| Y | 7  | ✓ | ✓  | 6  |   |    |   |    |
| Q | 8  | ✓ |    | 5  |   |    |   |    |
| F | 9  |   |    | 4  | ✓ |    |   |    |
| C | 10 |   |    | 3  |   |    |   |    |
| E | 11 |   |    | 2  |   |    |   |    |
| K | 12 | ✓ | ✓  | 1  |   |    |   |    |

Y C K F K E Y Q F C E K

dbValid true YLIQYK PHOS(1) 1. 909. -1.56753 5.39711 100. ? 1764.  
 S\_Acido\_new%gi|68567123|gb|AAY80052.1| YLIQYK%::::PHOS::%sample\_3%compd\_457

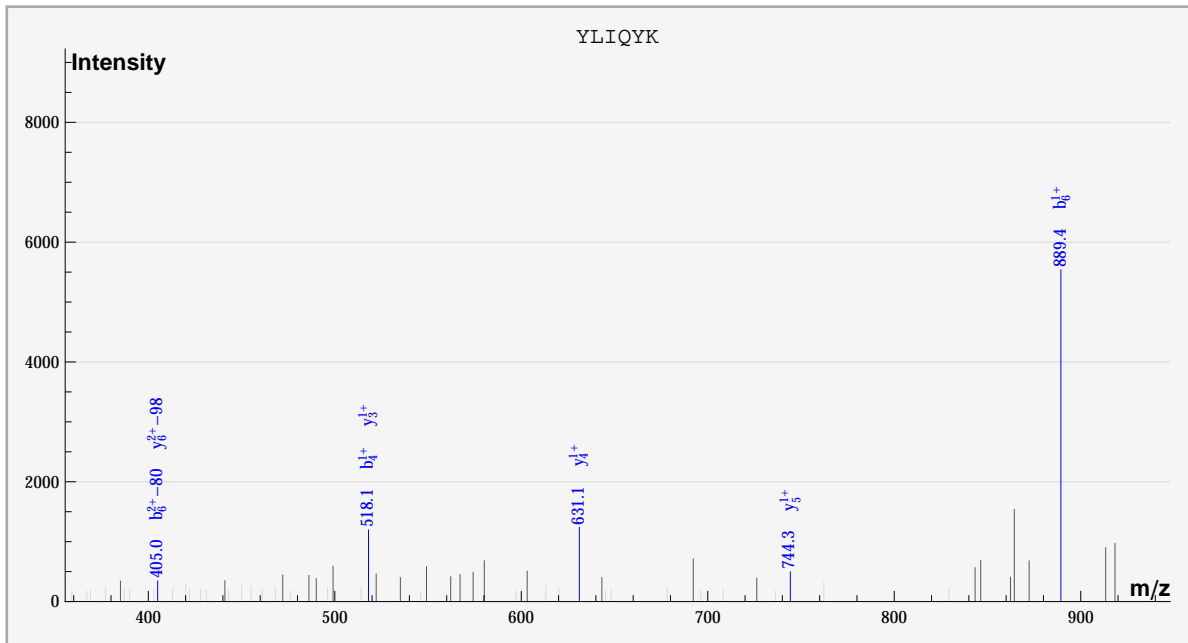

|   | # | b | b* | # | y | y* | P | P* |
|---|---|---|----|---|---|----|---|----|
| Y | 1 |   |    |   |   |    |   | ✓  |
| L | 2 |   |    | 5 | ✓ |    |   |    |
| I | 3 |   |    | 4 | ✓ |    |   |    |
| Q | 4 | ✓ |    | 3 | ✓ |    |   |    |
| Y | 5 |   |    | 2 |   |    |   |    |
| K | 6 | ✓ | ✓  | 1 |   |    |   |    |

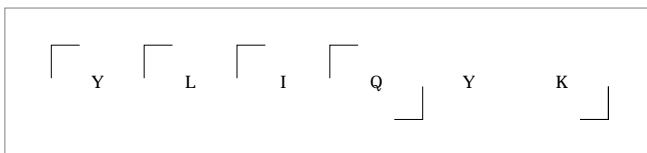

dbValid true YLIQYK PHOS(1) 1. 909. -1.56753 5.57485 100. ? 1776.  
 S\_Acido\_new%gi68567123|gb|AAY80052.1| YLIQYK%::::PHOS::%sample\_3%compd\_467

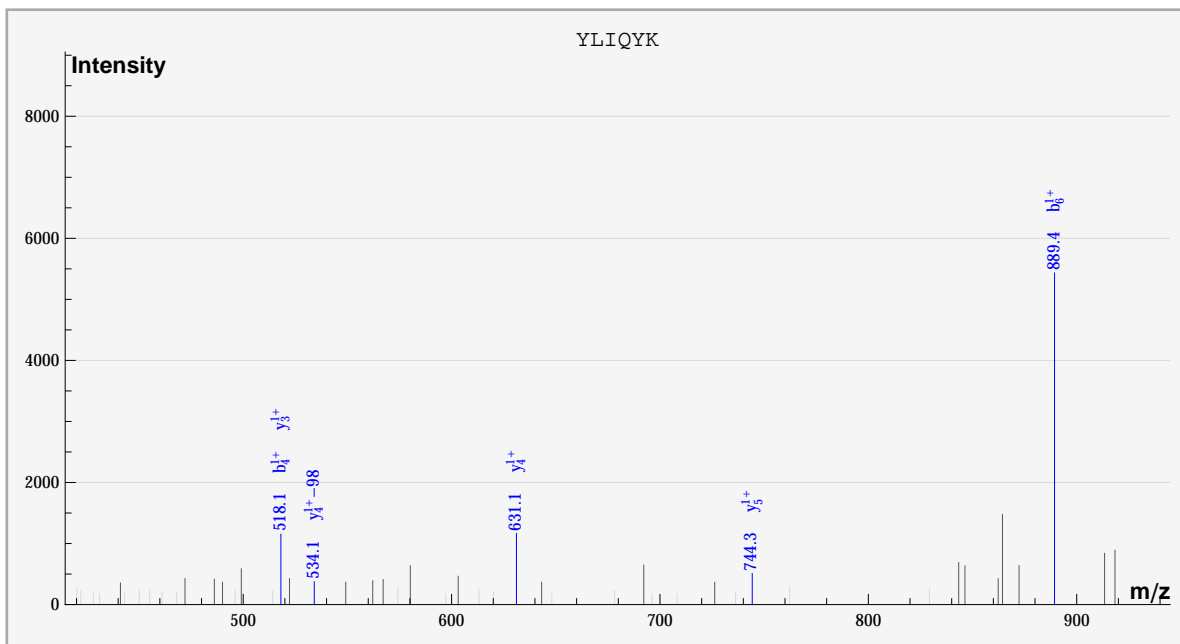

|   | # | b | b* | # | y | y* | P | P* |
|---|---|---|----|---|---|----|---|----|
| Y | 1 |   |    |   |   |    |   |    |
| L | 2 |   |    | 5 | ✓ |    |   |    |
| I | 3 |   |    | 4 | ✓ | ✓  |   |    |
| Q | 4 | ✓ |    | 3 | ✓ |    |   |    |
| Y | 5 |   |    | 2 |   |    |   |    |
| K | 6 | ✓ |    | 1 |   |    |   |    |

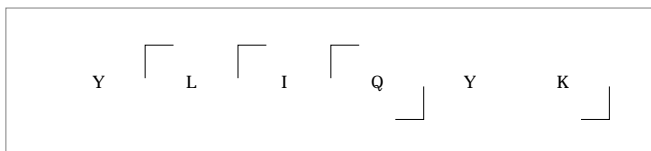

dbValid true YLIQYK PHOS(1) 1. 909. -1.56753 6.21481 100. ? 1812.  
 S\_Acido\_new%gi|68567123|gb|AAY80052.1| YLIQYK%::::PHOS::%sample\_3%compd\_498

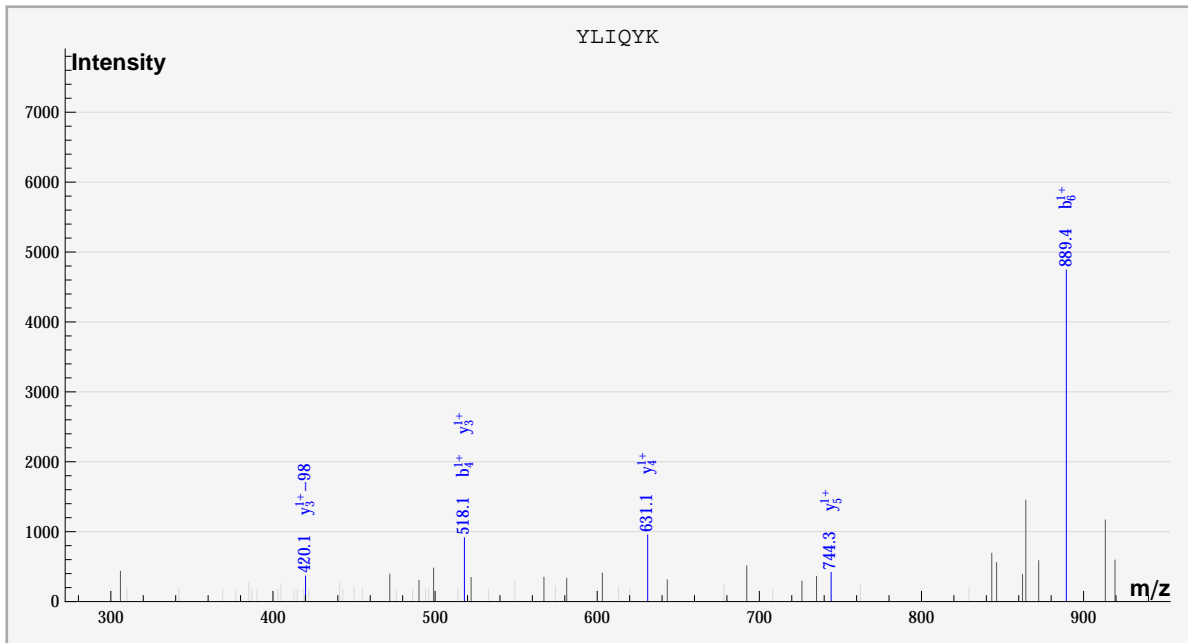

|   | # | b | b* | # | y | y* | P | P* |
|---|---|---|----|---|---|----|---|----|
| Y | 1 |   |    |   |   |    |   |    |
| L | 2 |   |    | 5 | ✓ |    |   |    |
| I | 3 |   |    | 4 | ✓ |    |   |    |
| Q | 4 | ✓ |    | 3 | ✓ | ✓  |   |    |
| Y | 5 |   |    | 2 |   |    |   |    |
| K | 6 | ✓ |    | 1 |   |    |   |    |

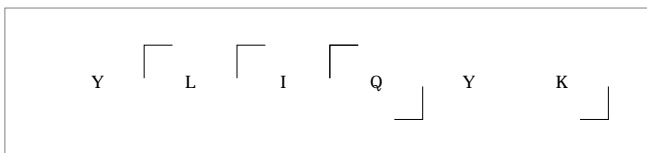



dbValid true YLIQYK PHOS(1) 1. 909. -1.56753 5.38694 100. ? 1824.  
 S\_Acido\_new%gi|68567123|gb|AAY80052.1| YLIQYK%::::PHOS::%sample\_3%cmpd\_508

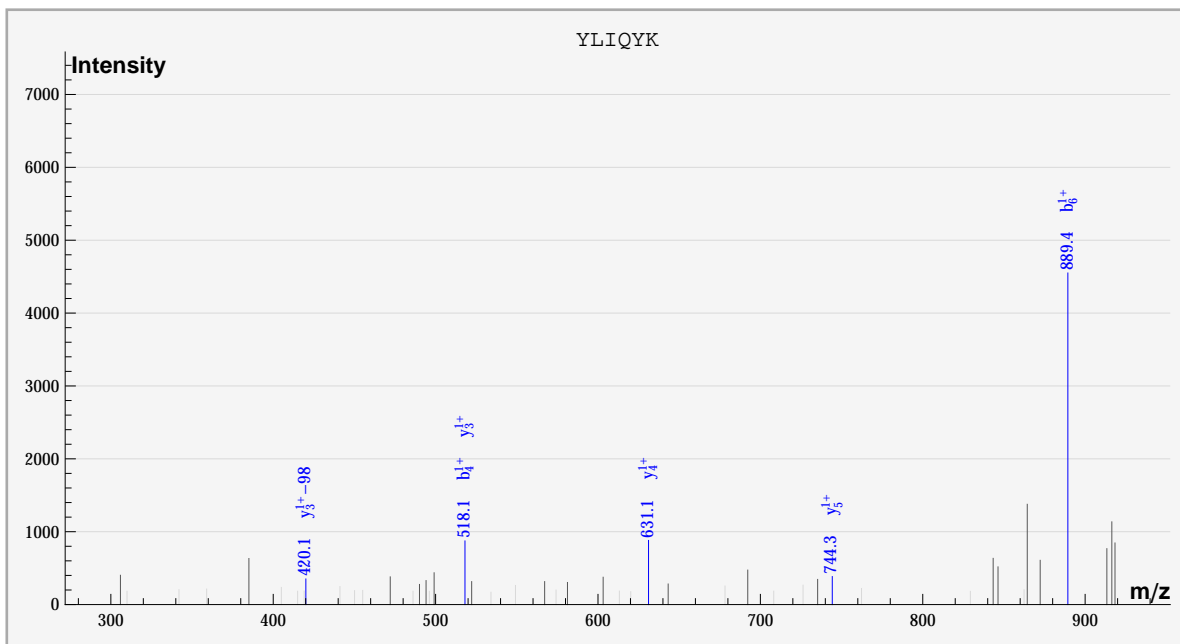

|   | # | b | b* | # | y | y* | P | P* |
|---|---|---|----|---|---|----|---|----|
| Y | 1 |   |    |   |   |    |   |    |
| L | 2 |   |    | 5 | ✓ |    |   |    |
| I | 3 |   |    | 4 | ✓ |    |   |    |
| Q | 4 | ✓ |    | 3 | ✓ | ✓  |   |    |
| Y | 5 |   |    | 2 |   |    |   |    |
| K | 6 | ✓ |    | 1 |   |    |   |    |

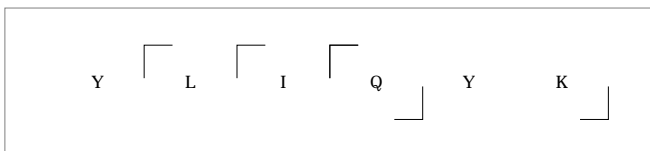

dbValid true YLIQYK PHOS(1) 1. 909. -1.56753 5.58222 100. ? 1836.  
 S\_Acido\_new%gi|68567123|gb|AAY80052.1| YLIQYK%::::PHOS::%sample\_3%compd\_518

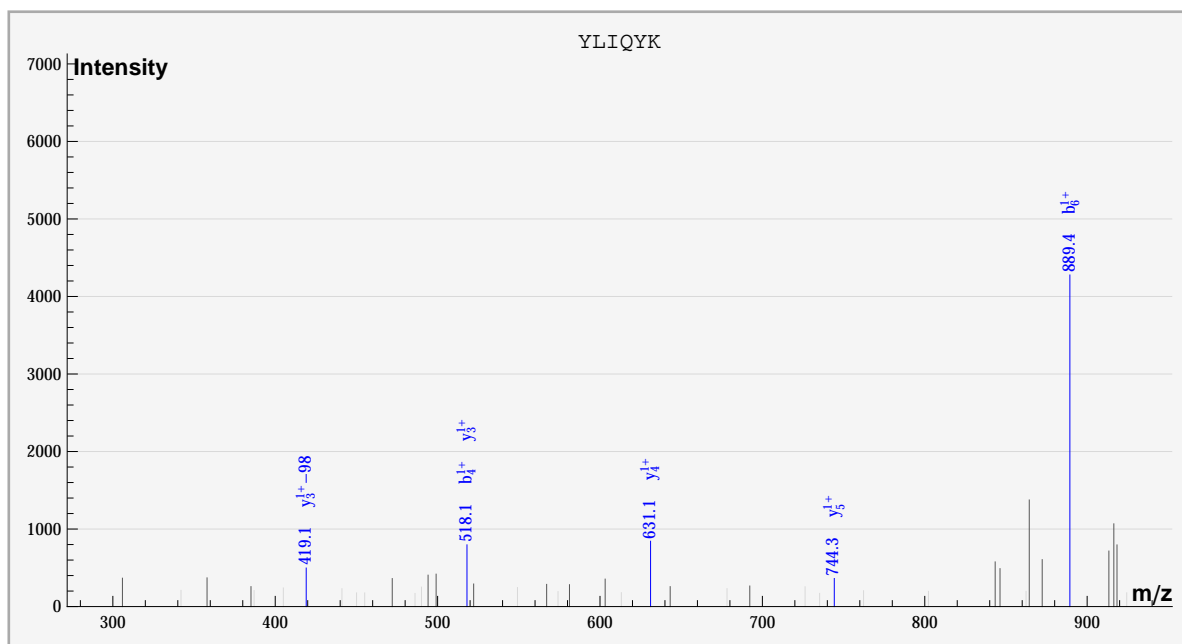

|   | # | b | b* | # | y | y* | P | P* |
|---|---|---|----|---|---|----|---|----|
| Y | 1 |   |    |   |   |    |   |    |
| L | 2 |   |    | 5 | ✓ |    |   |    |
| I | 3 |   |    | 4 | ✓ |    |   |    |
| Q | 4 | ✓ |    | 3 | ✓ | ✓  |   |    |
| Y | 5 |   |    | 2 |   |    |   |    |
| K | 6 | ✓ |    | 1 |   |    |   |    |

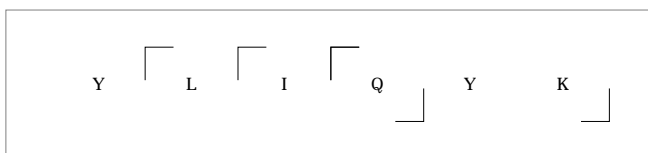

dbValid true YLIQYK PHOS(1) 1. 909. -1.56753 5.46754 100. ? 1848.  
 S\_Acido\_new%gi|68567123|gb|AAY80052.1| YLIQYK%::::PHOS::%sample\_3%cmpd\_528

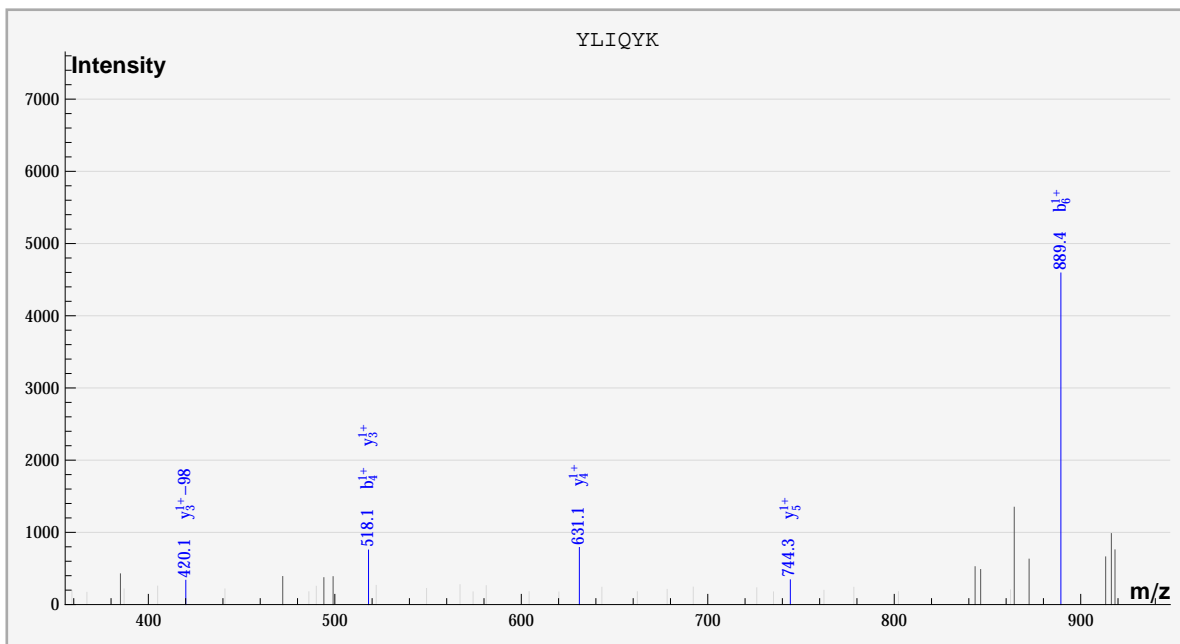

|   | # | b | b* | # | y | y* | P | P* |
|---|---|---|----|---|---|----|---|----|
| Y | 1 |   |    |   |   |    |   |    |
| L | 2 |   |    | 5 | ✓ |    |   |    |
| I | 3 |   |    | 4 | ✓ |    |   |    |
| Q | 4 | ✓ |    | 3 | ✓ | ✓  |   |    |
| Y | 5 |   |    | 2 |   |    |   |    |
| K | 6 | ✓ |    | 1 |   |    |   |    |





dbValid true KQTLVLK PHOS(1) 1. 911. -1.48314 5.85542 100. ? 2268.  
 S\_Acido\_new%gi|68567690|gb|AAY80619.1| KQTLVLK%:::PHOS:::%sample\_0%compd\_959

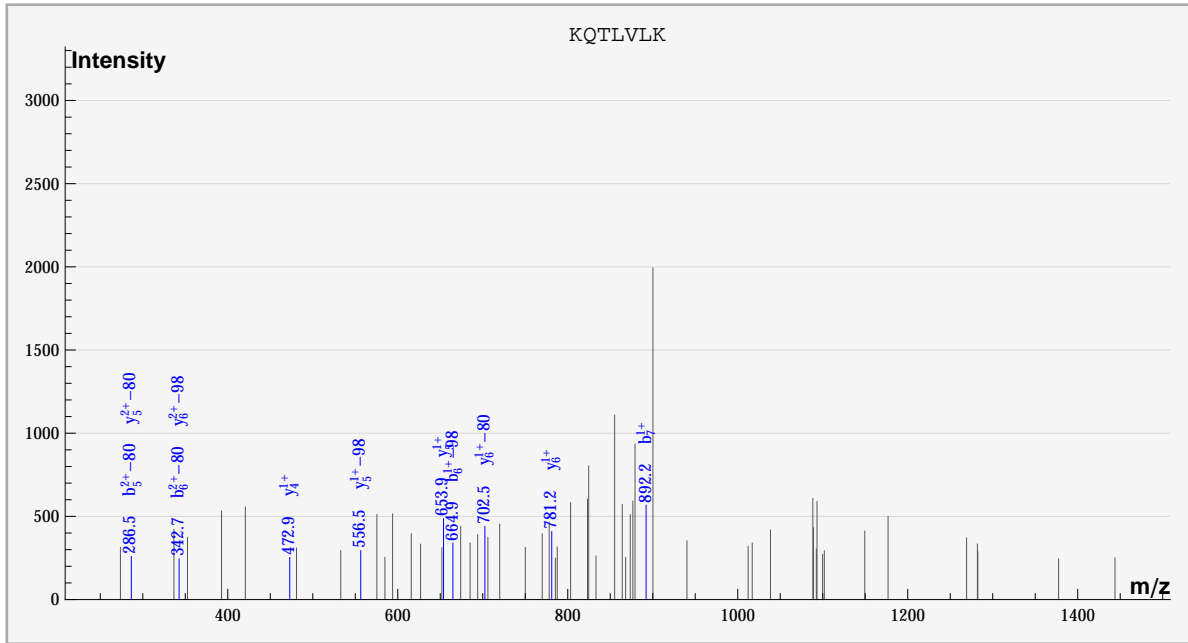

|   | # | b | b* | # | y | y* | P | P* |
|---|---|---|----|---|---|----|---|----|
| K | 1 |   |    |   |   |    |   |    |
| Q | 2 |   |    | 6 | ✓ | ✓  |   |    |
| T | 3 |   |    | 5 | ✓ | ✓  |   |    |
| L | 4 |   |    | 4 | ✓ |    |   |    |
| V | 5 |   | ✓  | 3 |   |    |   |    |
| L | 6 |   | ✓  | 2 |   |    |   |    |
| K | 7 | ✓ |    | 1 |   |    |   |    |

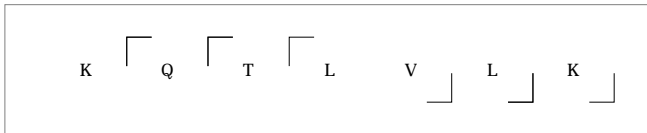

dbValid true GHISSGL Cys\_CAM(1),PHOS(1) 1. 911. -0.651185 5.13061 100. ? 2418.  
 S\_Acido\_new%gil68568683|gb|AAY81612.1| GHISSGL%:::Cys\_CAM:::PHOS:::sample\_0%compd\_1092

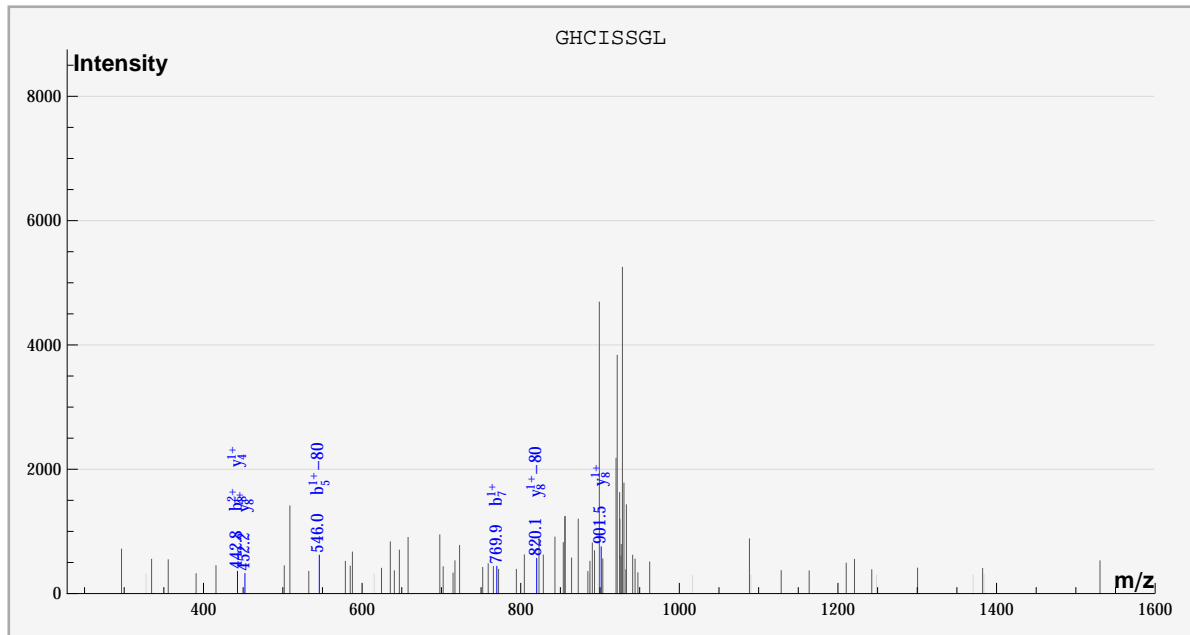

|   | # | b | b* | # | y | y* | P | P* |
|---|---|---|----|---|---|----|---|----|
| G | 1 |   |    |   |   |    | ✓ | ✓  |
| H | 2 |   |    | 7 |   |    |   |    |
| C | 3 |   |    | 6 |   |    |   |    |
| I | 4 |   |    | 5 |   |    |   |    |
| S | 5 |   | ✓  | 4 |   | ✓  |   |    |
| S | 6 |   |    | 3 |   |    |   |    |
| G | 7 | ✓ |    | 2 |   |    |   |    |
| L | 8 | ✓ |    | 1 |   |    |   |    |

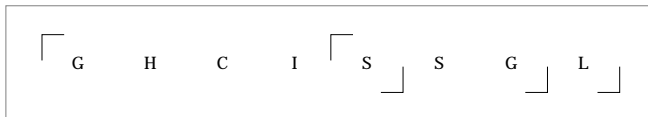

dbValid true AVFLHSR PHOS(1) 1. 911. -1.56581 5.1652 100. ? 2502.  
 S\_Acido\_new%gi|68567360|gb|AAY80289.1| AVFLHSR%::::::PHOS::%sample\_0%cmpd\_1171

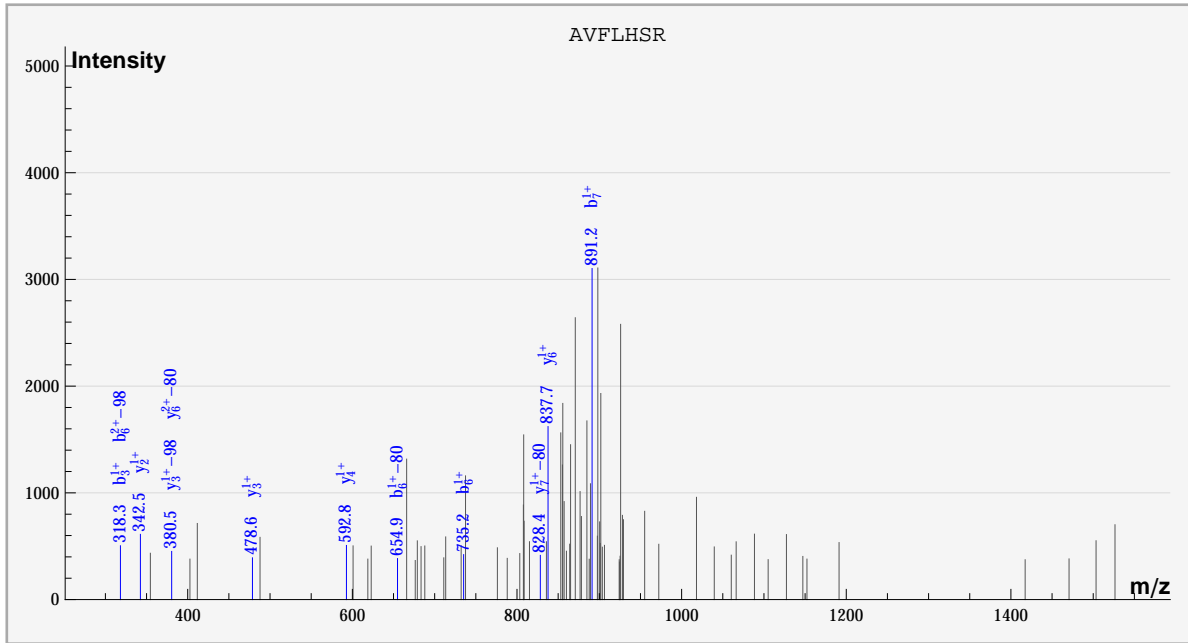

|   | # | b | b* | # | y | y* | P | P* |
|---|---|---|----|---|---|----|---|----|
| A | 1 |   |    |   |   |    |   | ✓  |
| V | 2 |   |    | 6 | ✓ | ✓  |   |    |
| F | 3 | ✓ |    | 5 |   |    |   |    |
| L | 4 |   |    | 4 | ✓ |    |   |    |
| H | 5 |   |    | 3 | ✓ | ✓  |   |    |
| S | 6 | ✓ | ✓  | 2 | ✓ |    |   |    |
| R | 7 | ✓ |    | 1 |   |    |   |    |

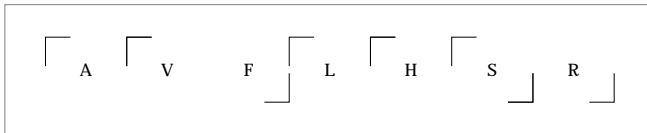

dbValid true DYFEEYNLENEMK Oxidation\_M(1),PHOS(1) 2. 912. -1.65796 5.46132 100. ? 2850.  
 S\_Acido\_new%gil68567693|gb|AAY80622.1| DYFEEYNLENEMK%::PHOS:::Oxidation\_M:::sample\_0%compd\_1361

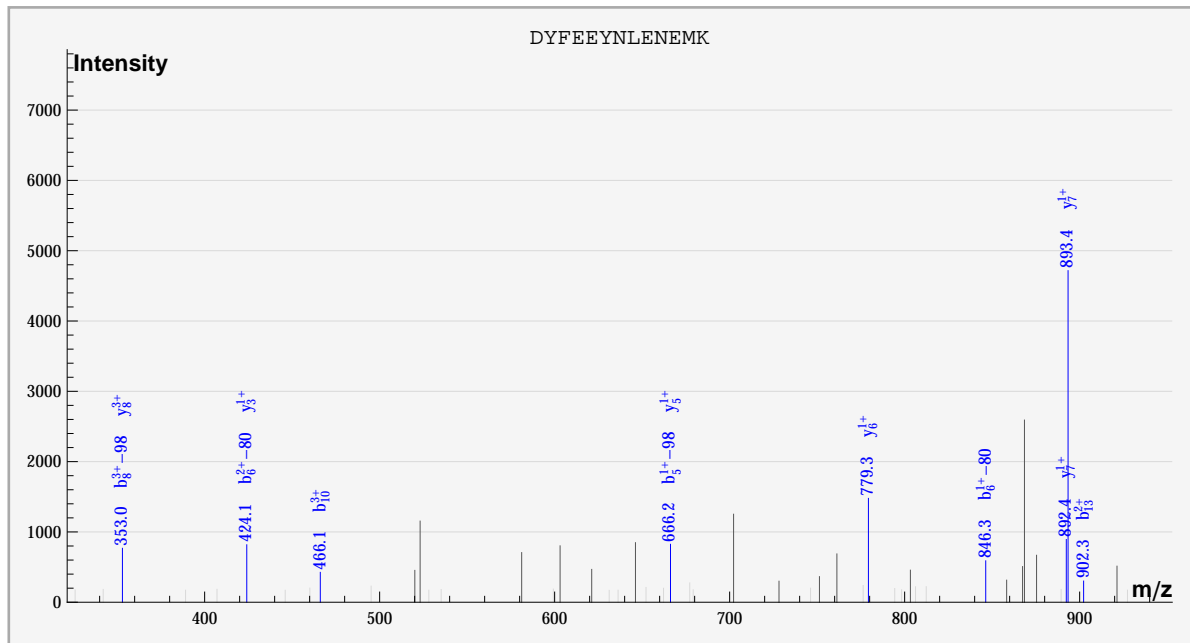

|   | #  | b | b* | #  | y | y* | P | P* |
|---|----|---|----|----|---|----|---|----|
| D | 1  |   |    |    |   |    |   |    |
| Y | 2  |   |    | 12 |   |    |   |    |
| F | 3  |   |    | 11 |   |    |   |    |
| E | 4  |   |    | 10 |   |    |   |    |
| E | 5  |   | ✓  | 9  |   |    |   |    |
| Y | 6  |   | ✓  | 8  | ✓ |    |   |    |
| N | 7  |   |    | 7  | ✓ |    |   |    |
| L | 8  |   | ✓  | 6  | ✓ |    |   |    |
| E | 9  |   |    | 5  | ✓ |    |   |    |
| N | 10 | ✓ |    | 4  |   |    |   |    |
| E | 11 |   |    | 3  | ✓ |    |   |    |
| M | 12 |   |    | 2  |   |    |   |    |
| K | 13 | ✓ |    | 1  |   |    |   |    |

D Y F E E [Y] N [L] E N [E] M K ]



dbValid true DYFEEYNLENEMK Oxidation\_M(1).PHOS(1) 2. 912. -1.65796 5.06953 100. ? 2886.  
 S\_Acido\_new%gi|68567693|gb|AAY80622.1| DYFEEYNLENEMK%::PHOS:::Oxidation\_M:::sample\_0%cmpd\_1392

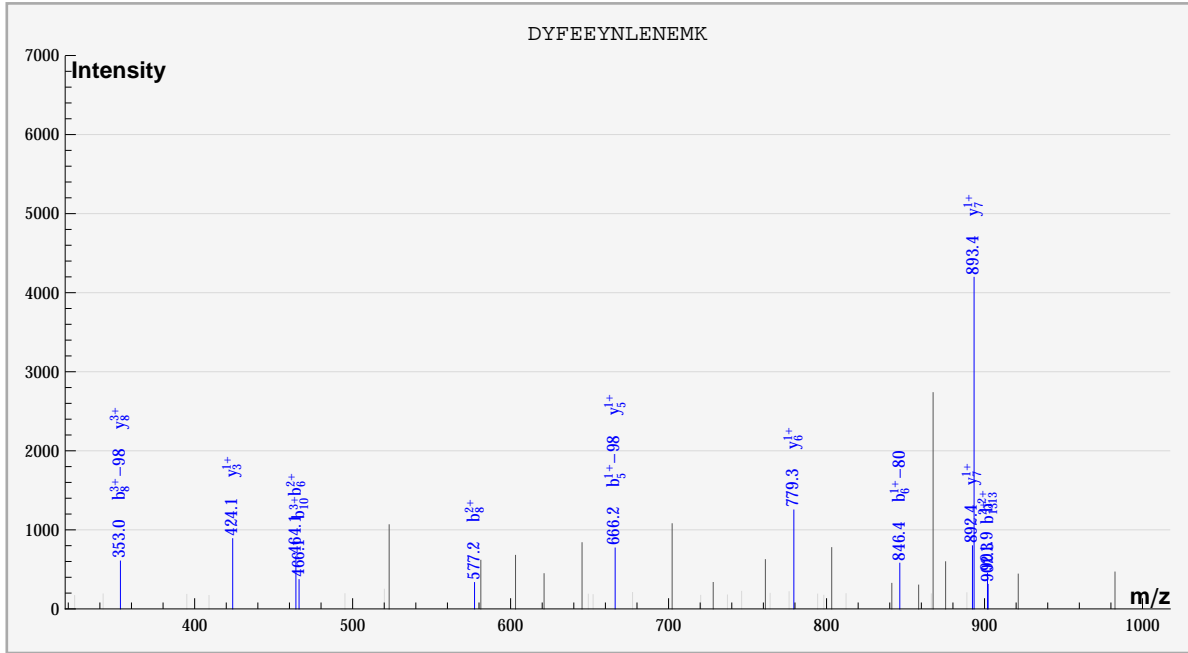

|   | #  | b | b* | #  | y | y* | P | P* |
|---|----|---|----|----|---|----|---|----|
| D | 1  |   |    |    |   |    |   |    |
| Y | 2  |   |    | 12 |   |    |   |    |
| F | 3  |   |    | 11 |   |    |   |    |
| E | 4  |   |    | 10 |   |    |   |    |
| E | 5  |   | ✓  | 9  |   |    |   |    |
| Y | 6  | ✓ | ✓  | 8  | ✓ |    |   |    |
| N | 7  |   |    | 7  | ✓ |    |   |    |
| L | 8  | ✓ | ✓  | 6  | ✓ |    |   |    |
| E | 9  |   |    | 5  | ✓ |    |   |    |
| N | 10 | ✓ |    | 4  |   |    |   |    |
| E | 11 |   |    | 3  | ✓ |    |   |    |
| M | 12 |   |    | 2  |   |    |   |    |
| K | 13 | ✓ |    | 1  |   |    |   |    |

D Y F E E Y N L E N E M K

dbValid true DYFEEYNLENEMK Oxidation\_M(1),PHOS(1) 2. 912. -1.65796 5.30535 100. ? 2898.  
 S\_Acido\_new%gi|68567693|gb|AA80622.1| DYFEEYNLENEMK%::PHOS:::Oxidation\_M:::sample\_0%cmpd\_1402

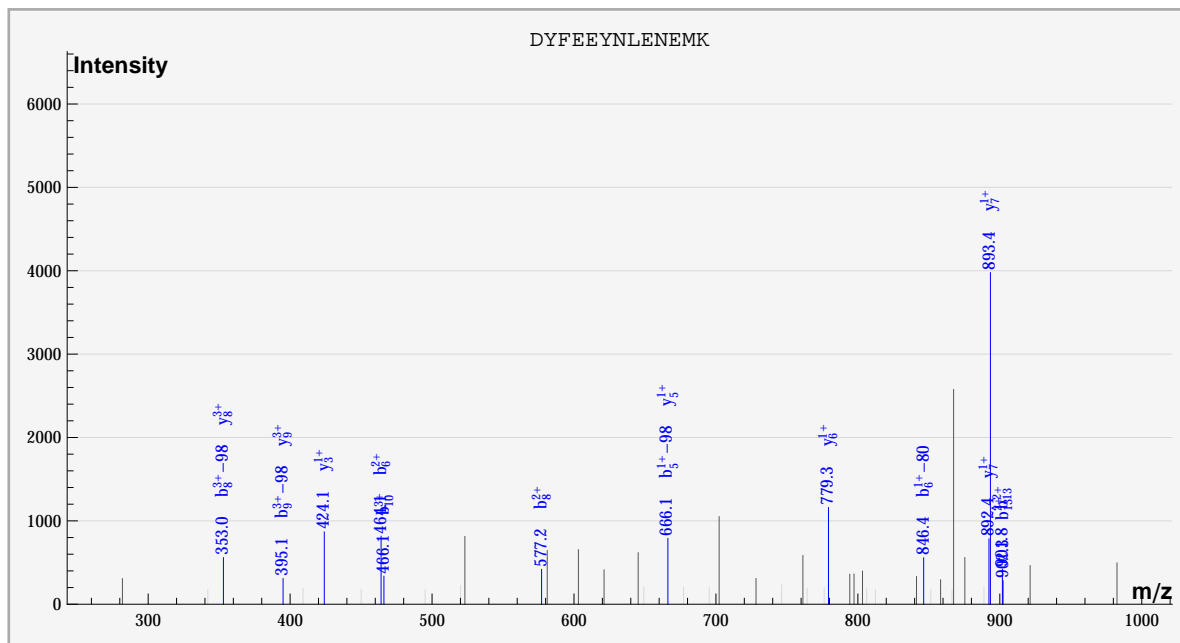

|   | #  | b | b* | #  | y | y* | P | P* |
|---|----|---|----|----|---|----|---|----|
| D | 1  |   |    |    |   |    |   |    |
| Y | 2  |   |    | 12 |   |    |   |    |
| F | 3  |   |    | 11 |   |    |   |    |
| E | 4  |   |    | 10 |   |    |   |    |
| E | 5  | ✓ | ✓  | 9  | ✓ | ✓  |   |    |
| Y | 6  | ✓ | ✓  | 8  | ✓ | ✓  |   |    |
| N | 7  |   |    | 7  | ✓ | ✓  |   |    |
| L | 8  | ✓ | ✓  | 6  | ✓ | ✓  |   |    |
| E | 9  |   | ✓  | 5  | ✓ | ✓  |   |    |
| N | 10 | ✓ |    | 4  |   |    |   |    |
| E | 11 |   |    | 3  | ✓ | ✓  |   |    |
| M | 12 |   |    | 2  |   |    |   |    |
| K | 13 | ✓ |    | 1  |   |    |   |    |

D Y F E E Y N L E N E M K

dbValid true DYFEEYNLENEMK Oxidation\_M(1),PHOS(1) 2. 912. -1.65796 5.30047 100. ? 2910.  
 S\_Acido\_new%gil68567693|gb|AAy80622.1| DYFEEYNLENEMK%::PHOS:::Oxidation\_M::%sample\_0%cmpd\_1412

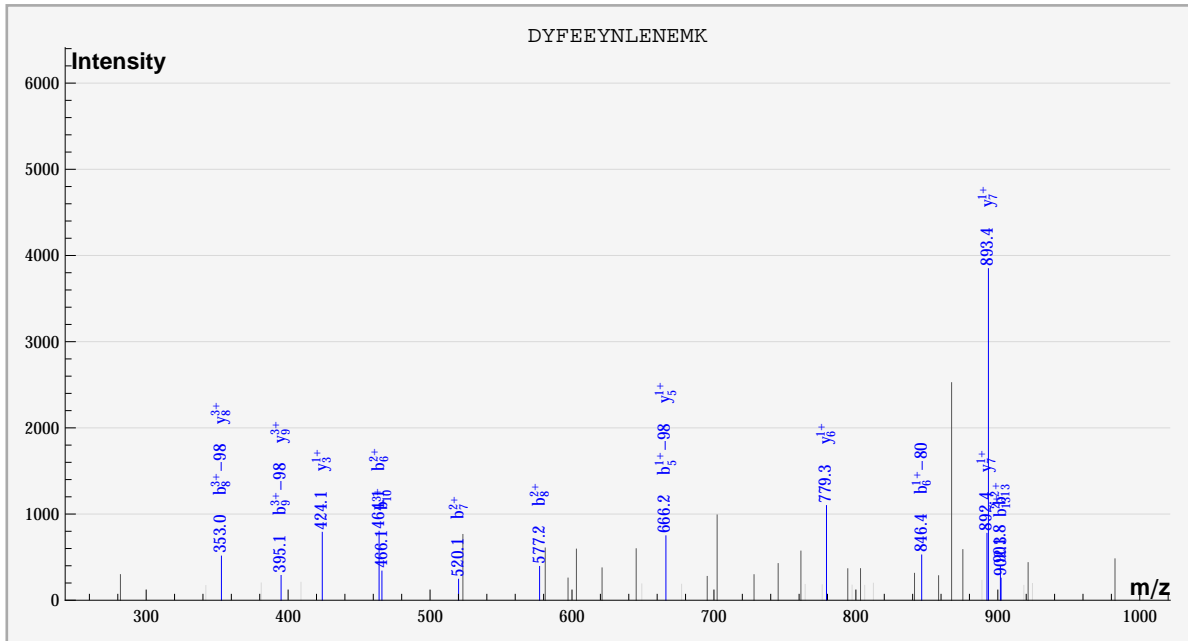

|   | #  | b | b* | #  | y | y* | P | P* |
|---|----|---|----|----|---|----|---|----|
| D | 1  |   |    |    |   |    |   |    |
| Y | 2  |   |    | 12 |   |    |   |    |
| F | 3  |   |    | 11 |   |    |   |    |
| E | 4  |   |    | 10 |   |    |   |    |
| E | 5  |   | ✓  | 9  |   | ✓  |   |    |
| Y | 6  | ✓ | ✓  | 8  |   | ✓  |   |    |
| N | 7  | ✓ |    | 7  |   | ✓  |   |    |
| L | 8  | ✓ | ✓  | 6  |   | ✓  |   |    |
| E | 9  |   | ✓  | 5  |   | ✓  |   |    |
| N | 10 | ✓ |    | 4  |   |    |   |    |
| E | 11 |   |    | 3  |   | ✓  |   |    |
| M | 12 |   |    | 2  |   |    |   |    |
| K | 13 | ✓ |    | 1  |   |    |   |    |

D Y F E E Y N L E N E M K

dbValid true DYFEYNLENEMK Oxidation\_M(1),PHOS(1) 2. 912. -1.65796 5.4695 100. ? 2922.  
 S\_Acido\_new%gi|68567693|gb|AAY80622.1| DYFEYNLENEMK%::PHOS:::Oxidation\_M:::sample\_0%cmpd\_1423

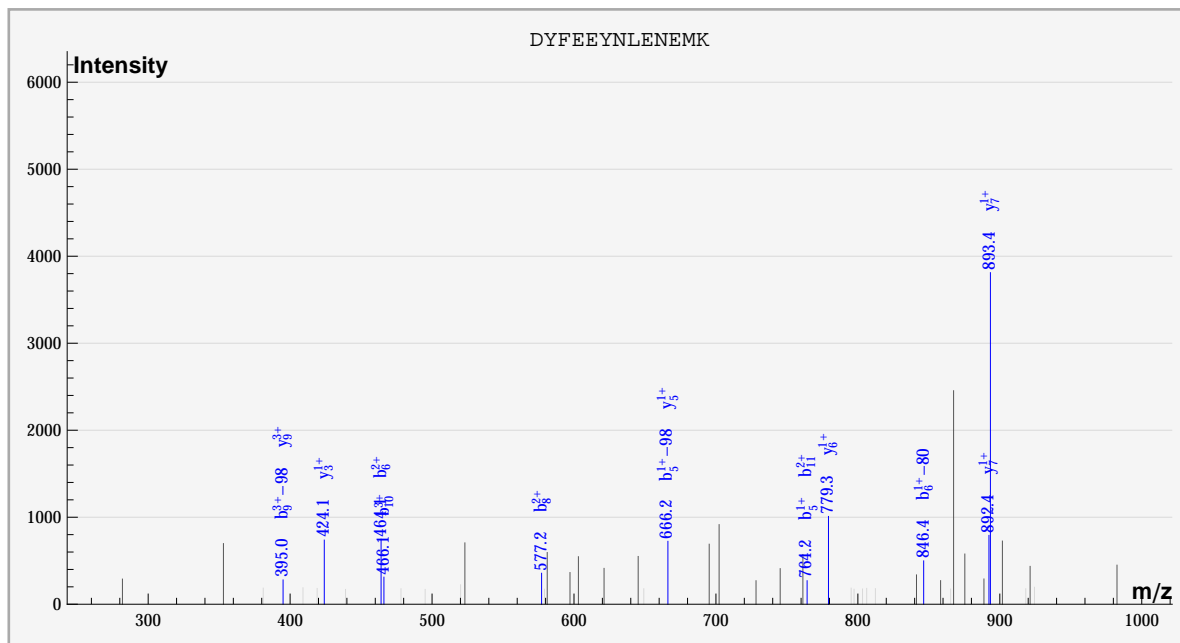

|   | #  | b | b* | #  | y | y* | P | P* |
|---|----|---|----|----|---|----|---|----|
| D | 1  |   |    |    |   |    |   |    |
| Y | 2  |   |    | 12 |   |    |   |    |
| F | 3  |   |    | 11 |   |    |   |    |
| E | 4  |   |    | 10 |   |    |   |    |
| E | 5  | ✓ | ✓  | 9  | ✓ |    |   |    |
| Y | 6  | ✓ | ✓  | 8  |   |    |   |    |
| N | 7  |   |    | 7  | ✓ |    |   |    |
| L | 8  | ✓ |    | 6  | ✓ |    |   |    |
| E | 9  |   | ✓  | 5  | ✓ |    |   |    |
| N | 10 | ✓ |    | 4  |   |    |   |    |
| E | 11 | ✓ |    | 3  | ✓ |    |   |    |
| M | 12 |   |    | 2  |   |    |   |    |
| K | 13 |   |    | 1  |   |    |   |    |

D Y F E E Y N L E N E M K

dbValid true DYFEEYNLENEMK Oxidation\_M(1),PHOS(1) 2. 912. -1.65796 5.1938 100. ? 2958.  
 S\_Acido\_new%gil68567693|gb|AAY80622.1| DYFEEYNLENEMK%::PHOS:::Oxidation\_M:::sample\_0%cmpd\_1453

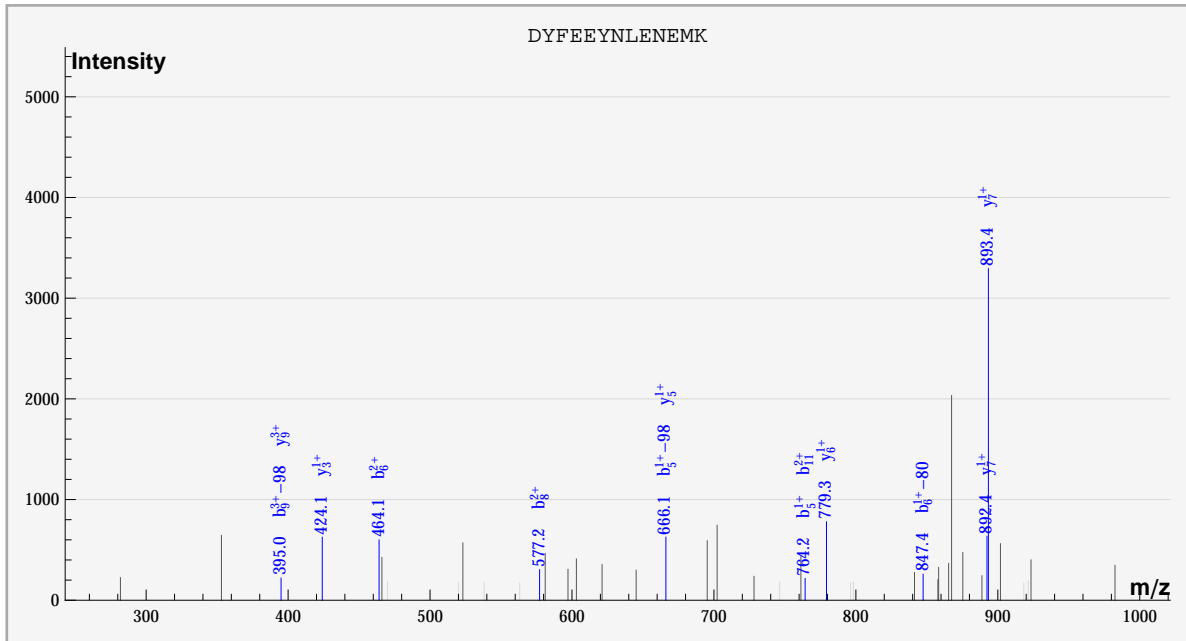

|   | #  | b | b* | #  | y | y* | P | P* |
|---|----|---|----|----|---|----|---|----|
| D | 1  |   |    |    |   |    |   |    |
| Y | 2  |   |    | 12 |   |    |   |    |
| F | 3  |   |    | 11 |   |    |   |    |
| E | 4  |   |    | 10 |   |    |   |    |
| E | 5  | ✓ | ✓  | 9  | ✓ |    |   |    |
| Y | 6  | ✓ | ✓  | 8  |   |    |   |    |
| N | 7  |   |    | 7  | ✓ |    |   |    |
| L | 8  | ✓ |    | 6  | ✓ |    |   |    |
| E | 9  |   | ✓  | 5  | ✓ |    |   |    |
| N | 10 |   |    | 4  |   |    |   |    |
| E | 11 | ✓ |    | 3  | ✓ |    |   |    |
| M | 12 |   |    | 2  |   |    |   |    |
| K | 13 |   |    | 1  |   |    |   |    |

D Y F E [ E ] Y [ N [ L ] E ] N [ E ] M K

dbValid true EKPKGIYIEYLTK PHOS(3) 2. 913. -1.60258 5.03503 100. ? 2244.

S\_Acido\_new%gi|68566930|gb|AAAY79859.1| EKPKGIYIEYLTK%::::::PHOS::PHOS::PHOS::%sample\_0%cmpd\_939

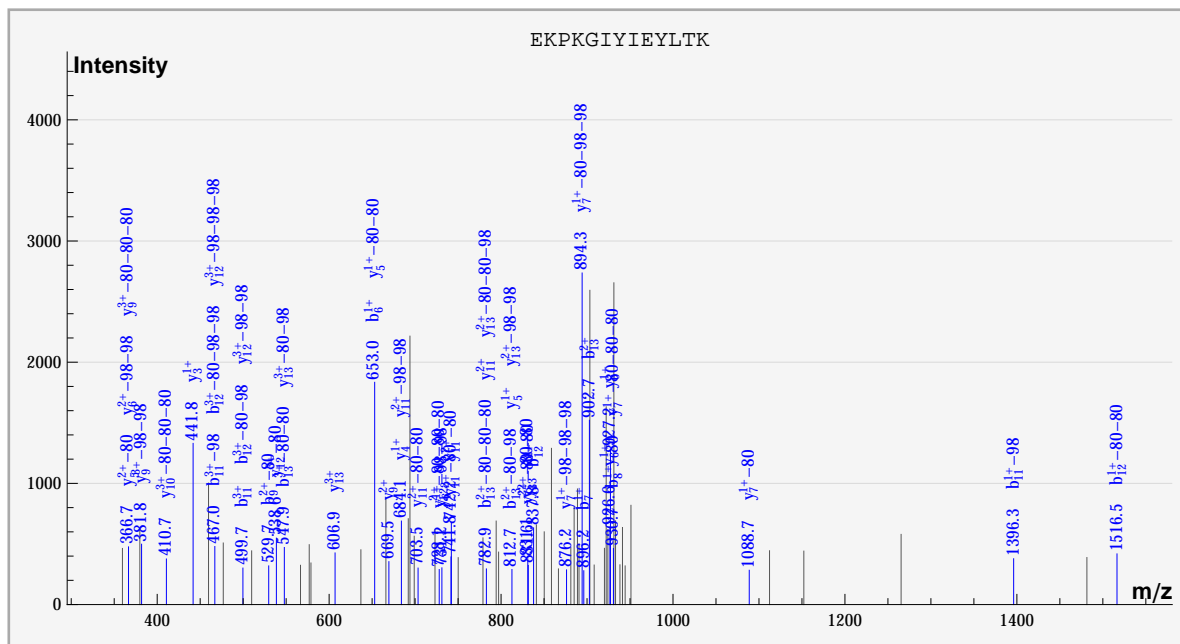

|   | #  | b | b* | #  | y | y* | P | P* |
|---|----|---|----|----|---|----|---|----|
| E | 1  |   |    |    |   |    | ✓ | ✓  |
| K | 2  |   |    | 12 |   | ✓  |   |    |
| P | 3  |   |    | 11 | ✓ | ✓  |   |    |
| K | 4  |   |    | 10 |   | ✓  |   |    |
| G | 5  |   |    | 9  | ✓ | ✓  |   |    |
| I | 6  | ✓ |    | 8  |   |    |   |    |
| Y | 7  | ✓ |    | 7  |   | ✓  |   |    |
| I | 8  |   | ✓  | 6  | ✓ | ✓  |   |    |
| E | 9  |   | ✓  | 5  | ✓ | ✓  |   |    |
| Y | 10 |   |    | 4  | ✓ |    |   |    |
| L | 11 | ✓ | ✓  | 3  | ✓ |    |   |    |
| T | 12 | ✓ | ✓  | 2  |   |    |   |    |
| K | 13 | ✓ | ✓  | 1  |   |    |   |    |

[ E ] [ K ] [ P ] [ K ] [ G ] [ I ] [ Y ] [ I ] [ E ] [ Y ] [ L ] [ T ] [ K ]

dbValid true KAEYSR PHOS(2) 1. 914. -0.678415 5.2767 100. ? 1662.  
 S\_Acido\_new%gii68568224|gb|AAy81153.1| KAEYSR%:::PHOS:PHOS::%sample\_0%cmpd\_407

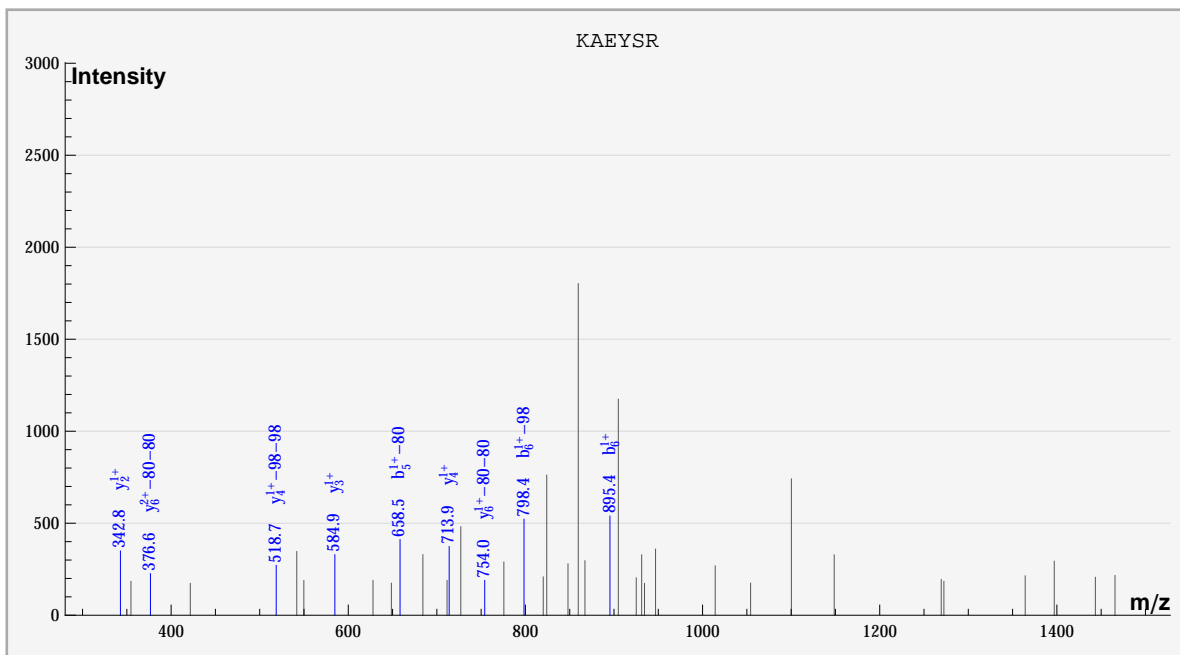

|   | # | b | b* | # | y | y* | P | P* |
|---|---|---|----|---|---|----|---|----|
| K | 1 |   |    |   |   |    |   | ✓  |
| A | 2 |   |    | 5 |   |    |   |    |
| E | 3 |   |    | 4 | ✓ | ✓  |   |    |
| Y | 4 |   |    | 3 | ✓ |    |   |    |
| S | 5 | ✓ | ✓  | 2 | ✓ |    |   |    |
| R | 6 | ✓ | ✓  | 1 |   |    |   |    |

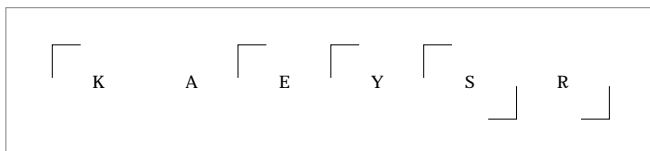

dbValid true HYKISGNAGYISNNK PHOS(2) 2. 914. -0.612888 5.09792 100. ? 2478.  
 S\_Acido\_new%gi|68566794|gb|AA79723.1| HYKISGNAGYISNNK%::::PHOS::::PHOS::::%sample\_1%compd\_1049

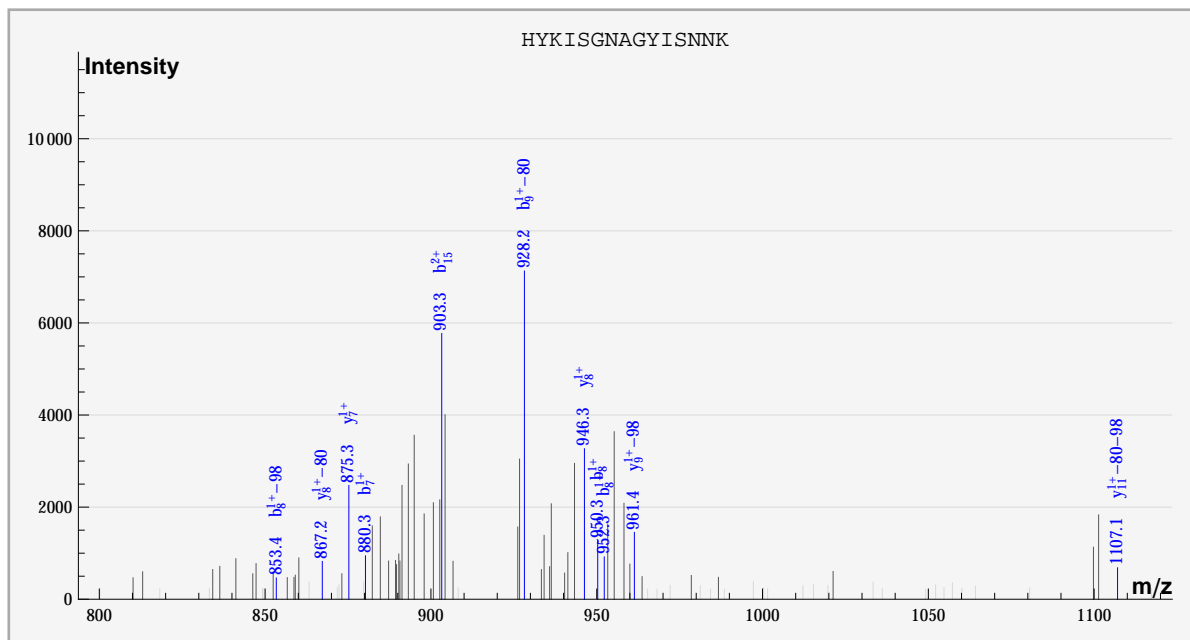

|   | #  | b | b* | #  | y | y* | P | P* |
|---|----|---|----|----|---|----|---|----|
| H | 1  |   |    |    |   |    |   |    |
| Y | 2  |   |    | 14 |   |    |   |    |
| K | 3  |   |    | 13 |   |    |   |    |
| I | 4  |   |    | 12 |   |    |   |    |
| S | 5  |   |    | 11 |   | ✓  |   |    |
| G | 6  |   |    | 10 |   |    |   |    |
| N | 7  | ✓ |    | 9  |   | ✓  |   |    |
| A | 8  | ✓ | ✓  | 8  | ✓ | ✓  |   |    |
| G | 9  |   | ✓  | 7  | ✓ |    |   |    |
| Y | 10 |   |    | 6  |   |    |   |    |
| I | 11 |   |    | 5  |   |    |   |    |
| S | 12 |   |    | 4  |   |    |   |    |
| N | 13 |   |    | 3  |   |    |   |    |
| N | 14 |   |    | 2  |   |    |   |    |
| K | 15 | ✓ |    | 1  |   |    |   |    |

H Y K I [ S G [ N ] A [ G ] Y I S N N K ]



dbValid true VEGTGEIK PHOS(1) 1. 914. -1.59264 5.70843 100. ? 2658.  
 S\_Acido\_new%gi|68568659|gb|AAY81588.1| VEGTGEIK%:::PHOS:::%sample\_0%compd\_1198

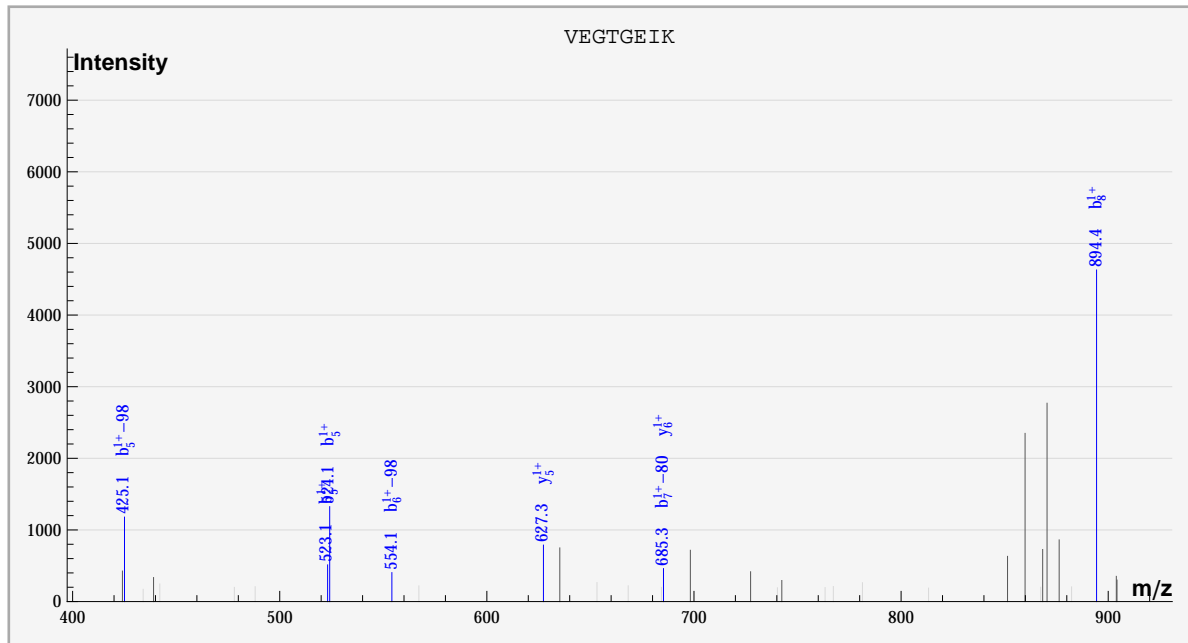

|   | # | b | b* | # | y | y* | P | P* |
|---|---|---|----|---|---|----|---|----|
| V | 1 |   |    |   |   |    |   |    |
| E | 2 |   |    | 7 |   |    |   |    |
| G | 3 |   |    | 6 | ✓ |    |   |    |
| T | 4 |   |    | 5 | ✓ |    |   |    |
| G | 5 | ✓ | ✓  | 4 |   |    |   |    |
| E | 6 |   | ✓  | 3 |   |    |   |    |
| I | 7 |   | ✓  | 2 |   |    |   |    |
| K | 8 | ✓ |    | 1 |   |    |   |    |

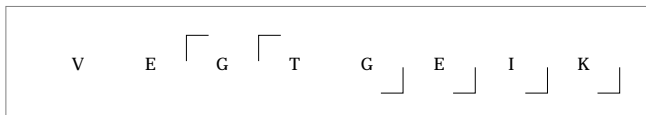

dbValid true DEKDYELIADKISK PHOS(2) 2. 915. -1.10337 5.38201 100. ? 2220.

S\_Acido\_new%gi|68567813|gb|AAY80742.1| DEKDYELIADKISK%:::::PHOS:::::PHOS::%sample\_0%cmpd\_831

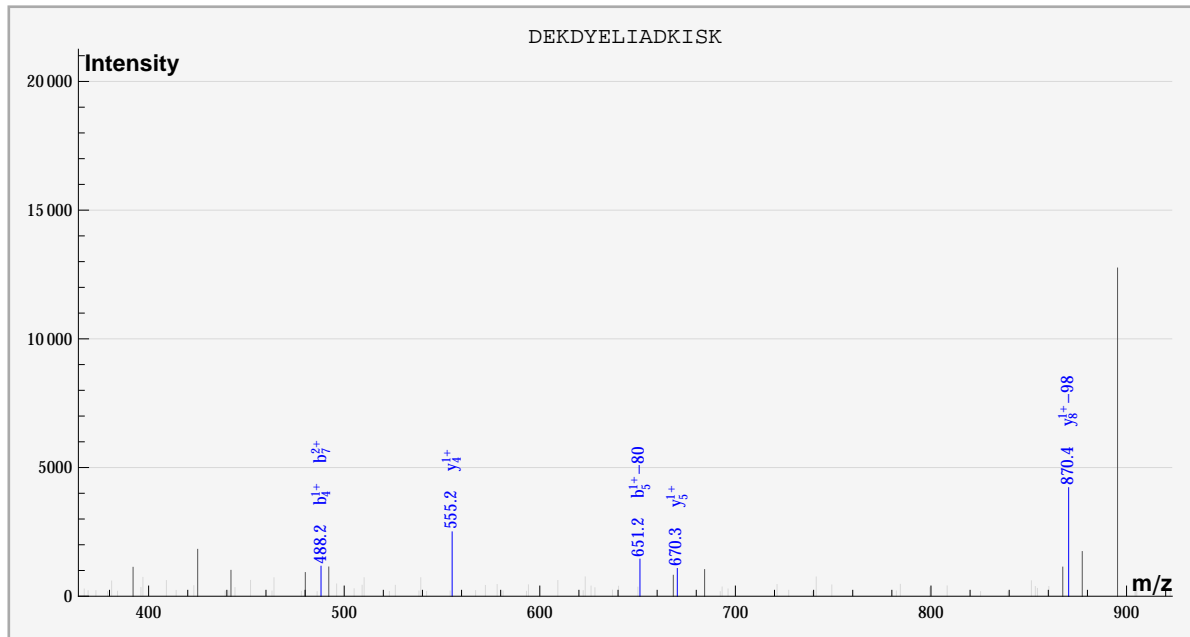

|   | #  | b | b* | #  | y | y* | P | P* |
|---|----|---|----|----|---|----|---|----|
| D | 1  |   |    |    |   |    |   |    |
| E | 2  |   |    | 13 |   |    |   |    |
| K | 3  |   |    | 12 |   |    |   |    |
| D | 4  | ✓ |    | 11 |   |    |   |    |
| Y | 5  |   | ✓  | 10 |   |    |   |    |
| E | 6  |   |    | 9  |   |    |   |    |
| L | 7  | ✓ |    | 8  |   | ✓  |   |    |
| I | 8  |   |    | 7  |   |    |   |    |
| A | 9  |   |    | 6  |   |    |   |    |
| D | 10 |   |    | 5  | ✓ |    |   |    |
| K | 11 |   |    | 4  | ✓ |    |   |    |
| I | 12 |   |    | 3  |   |    |   |    |
| S | 13 |   |    | 2  |   |    |   |    |
| K | 14 |   |    | 1  |   |    |   |    |

D E K D Y E L I A D K I S K

dbValid true CYRKFSGPAYTR Cys\_CAM(1),PHOS(4) 2. 915.  
 -1.69786 5.13162 100. ? 2898. S\_Acido\_new%g|68566666|gb|AA79595.1|  
 CYRKFSGPAYTR%:Cys\_CAM:PHOS:::PHOS:::PHOS:PHOS::%sample\_0%compd\_1405

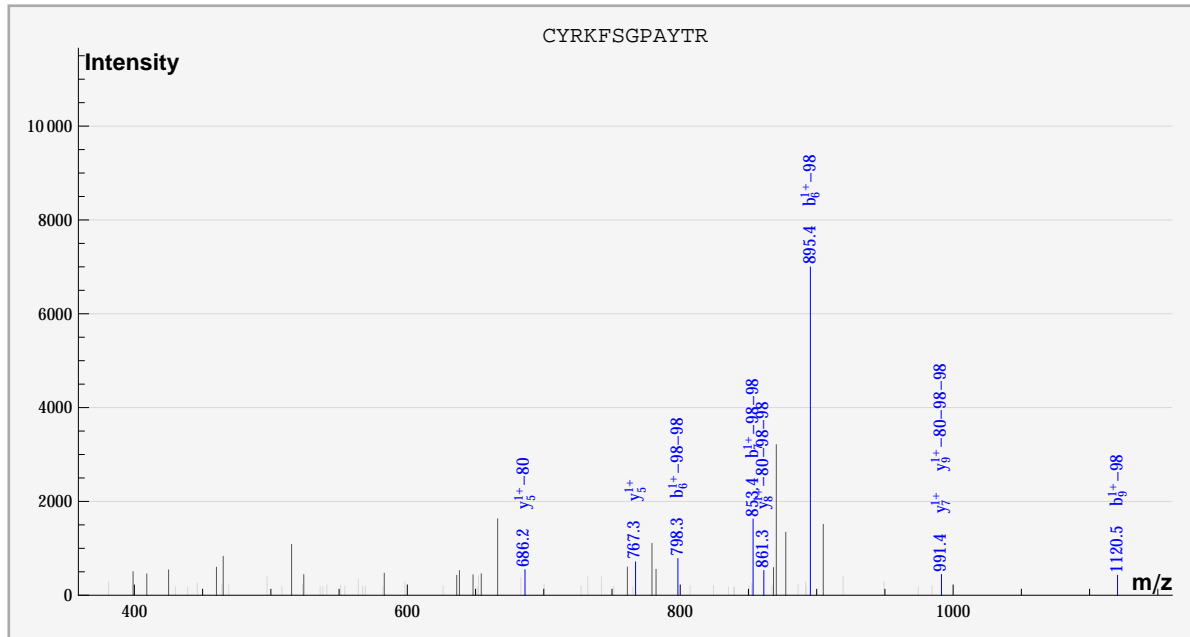

|   | #  | b | b* | #  | y | y* | P | P* |
|---|----|---|----|----|---|----|---|----|
| C | 1  |   |    |    |   |    |   |    |
| Y | 2  |   |    | 11 |   |    |   |    |
| R | 3  |   |    | 10 |   |    |   |    |
| K | 4  |   |    | 9  |   | ✓  |   |    |
| F | 5  |   |    | 8  |   | ✓  |   |    |
| S | 6  | ✓ |    | 7  | ✓ |    |   |    |
| G | 7  | ✓ |    | 6  |   |    |   |    |
| P | 8  |   |    | 5  | ✓ | ✓  |   |    |
| A | 9  | ✓ |    | 4  |   |    |   |    |
| Y | 10 |   |    | 3  |   |    |   |    |
| T | 11 |   |    | 2  |   |    |   |    |
| R | 12 |   |    | 1  |   |    |   |    |

C Y R K F S G P A Y T R

dbValid true YKIDMWISKAENR Oxidation\_M(1),PHOS(2) 2. 916. -0.611743 6.07307 100. ? 4176.  
 S\_Acido\_new%gij68567985|gb|AAy80914.1| YKIDMWISKAENR%:PHOS:::Oxidation\_M:::PHOS:::sample\_0%compd\_2709

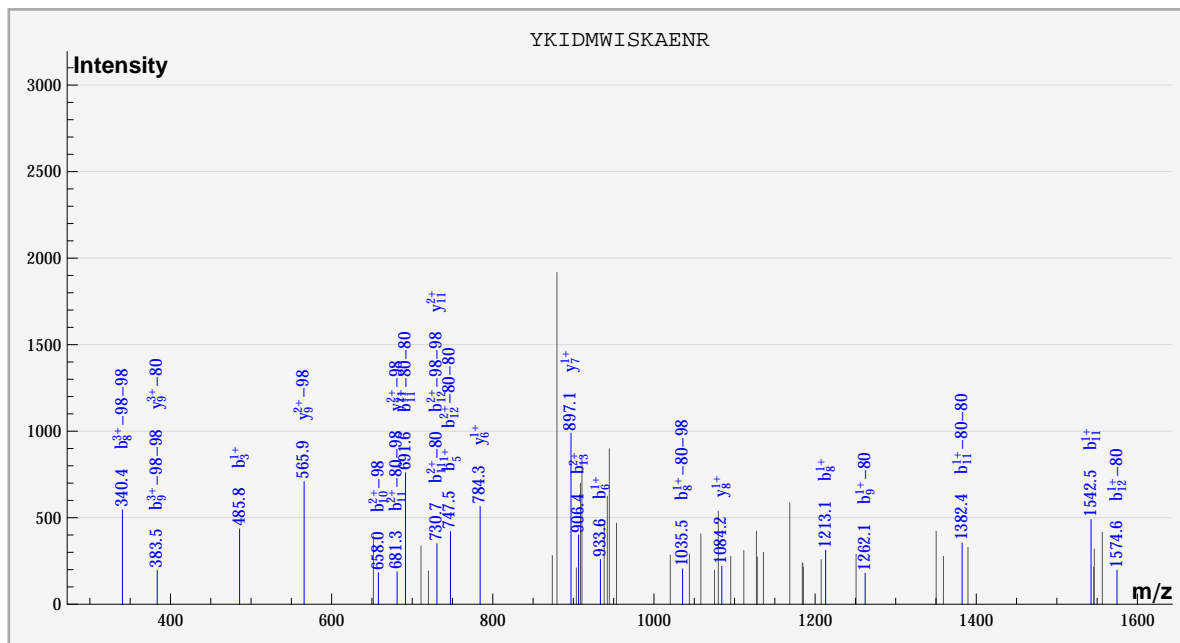

|   | #  | b | b* | #  | y | y* | P | P* |
|---|----|---|----|----|---|----|---|----|
| Y | 1  |   |    |    |   |    |   |    |
| K | 2  |   |    | 12 |   |    |   |    |
| I | 3  | ✓ |    | 11 | ✓ | ✓  |   |    |
| D | 4  |   |    | 10 |   |    |   |    |
| M | 5  | ✓ |    | 9  |   | ✓  |   |    |
| W | 6  | ✓ |    | 8  | ✓ |    |   |    |
| I | 7  |   |    | 7  | ✓ |    |   |    |
| S | 8  | ✓ | ✓  | 6  | ✓ |    |   |    |
| K | 9  |   | ✓  | 5  |   |    |   |    |
| A | 10 |   | ✓  | 4  |   |    |   |    |
| E | 11 | ✓ | ✓  | 3  |   |    |   |    |
| N | 12 |   | ✓  | 2  |   |    |   |    |
| R | 13 | ✓ |    | 1  |   |    |   |    |

Y K I D M W I S K A E N R

dbValid true MKVFSIMKISDIK Oxidation\_M(1),PHOS(2) 2. 916. -1.05872 5.94792 100. ? 4296.

S\_Acido\_new%gi68567853|gb|AAy80782.1| MKVFSIMKISDIK%::::PHOS::Oxidation\_M::PHOS::::%sample\_0%compd\_2595

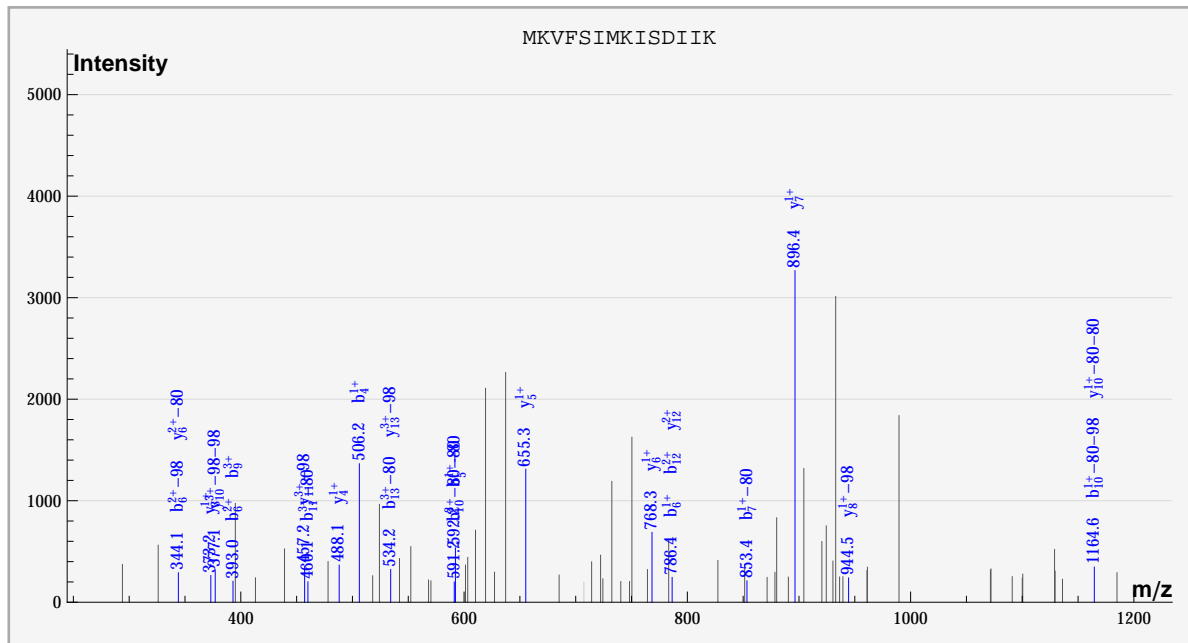

|   | #  | b | b* | #  | y | y* | P | P* |
|---|----|---|----|----|---|----|---|----|
| M | 1  |   |    |    |   |    |   |    |
| K | 2  |   |    | 13 |   | ✓  |   |    |
| V | 3  |   |    | 12 | ✓ |    |   |    |
| F | 4  | ✓ |    | 11 |   | ✓  |   |    |
| S | 5  |   | ✓  | 10 |   | ✓  |   |    |
| I | 6  | ✓ | ✓  | 9  |   |    |   |    |
| M | 7  |   | ✓  | 8  |   | ✓  |   |    |
| K | 8  |   |    | 7  | ✓ |    |   |    |
| I | 9  | ✓ |    | 6  | ✓ | ✓  |   |    |
| S | 10 |   | ✓  | 5  | ✓ |    |   |    |
| D | 11 |   | ✓  | 4  | ✓ |    |   |    |
| I | 12 | ✓ |    | 3  | ✓ |    |   |    |
| I | 13 |   | ✓  | 2  |   |    |   |    |
| K | 14 |   |    | 1  |   |    |   |    |

M [ K [ V [ F [ S ] I ] M [ K [ I ] S ] D ] I ] I ] K



dbValid true MKVFSIMKISDIK Oxidation\_M(1),PHOS(2) 2. 916. -1.05872 6.26647 100. ? 4320.  
 S\_Acido\_new%gi68567853|gb|AAy80782.1| MKVFSIMKISDIK%::::PHOS::Oxidation\_M::PHOS::::%sample\_0%compd\_2616

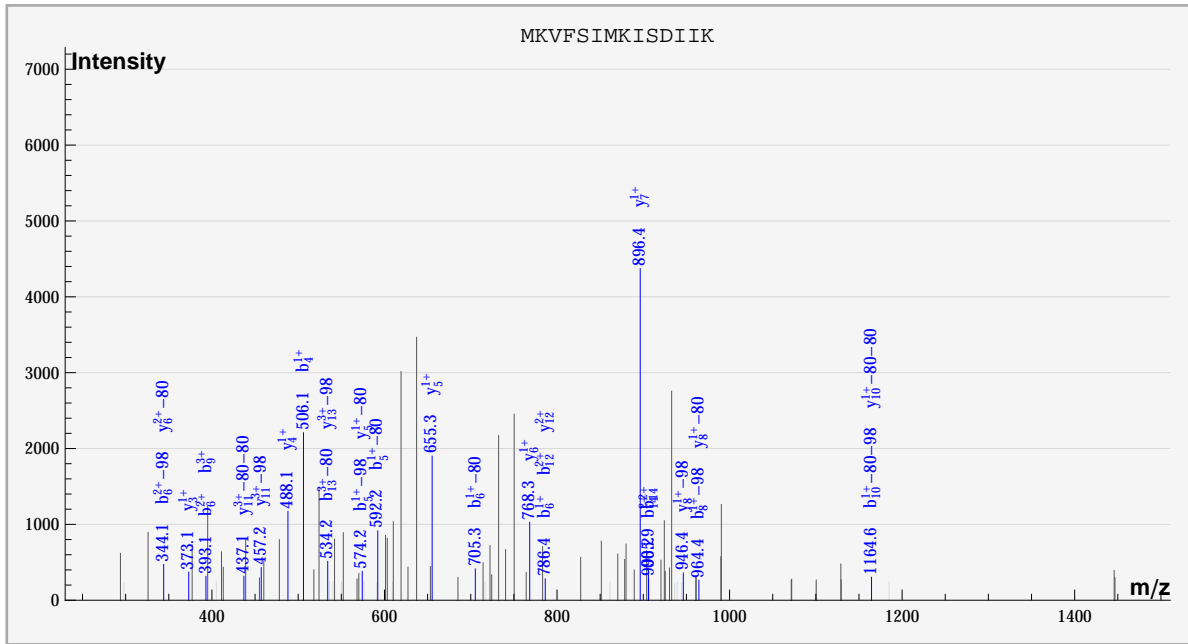

|   | #  | b | b* | #  | y | y* | P | P* |
|---|----|---|----|----|---|----|---|----|
| M | 1  |   |    |    |   |    |   |    |
| K | 2  |   |    | 13 |   | ✓  |   |    |
| V | 3  |   |    | 12 | ✓ |    |   |    |
| F | 4  | ✓ |    | 11 |   | ✓  |   |    |
| S | 5  |   | ✓  | 10 |   | ✓  |   |    |
| I | 6  | ✓ | ✓  | 9  |   |    |   |    |
| M | 7  |   |    | 8  |   | ✓  |   |    |
| K | 8  |   | ✓  | 7  | ✓ |    |   |    |
| I | 9  | ✓ |    | 6  | ✓ | ✓  |   |    |
| S | 10 |   | ✓  | 5  | ✓ | ✓  |   |    |
| D | 11 |   |    | 4  | ✓ |    |   |    |
| I | 12 | ✓ |    | 3  | ✓ |    |   |    |
| I | 13 |   | ✓  | 2  |   |    |   |    |
| K | 14 | ✓ |    | 1  |   |    |   |    |

M [ K [ V [ F [ S ] I ] M [ K ] I ] S ] D [ I ] I ] K ]

dbValid true MKVFSIMKISDIK Oxidation\_M(1),PHOS(2) 2. 916. -1.05872 6.47093 100. ? 4332.  
 S\_Acido\_new%gi68567853|gb|AAy80782.1| MKVFSIMKISDIK%::::PHOS:::Oxidation\_M:::PHOS:::::%sample\_0%compd\_2626

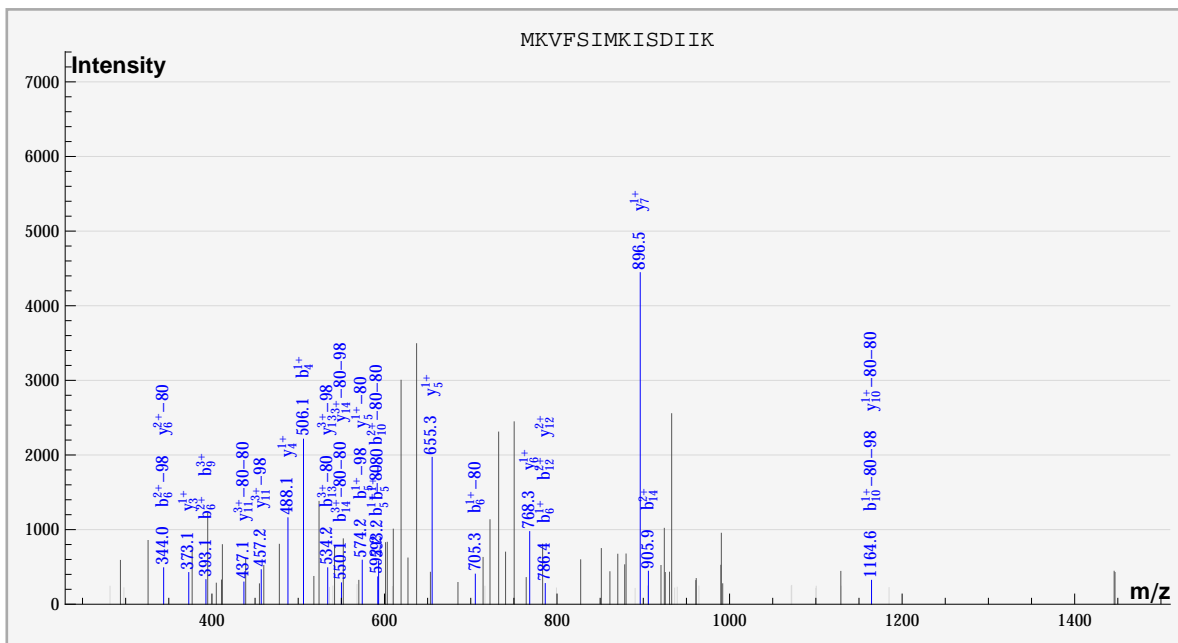

|   | #  | b | b* | #  | y | y* | P | P* |
|---|----|---|----|----|---|----|---|----|
| M | 1  |   |    |    |   |    |   | ✓  |
| K | 2  |   |    | 13 |   | ✓  |   |    |
| V | 3  |   |    | 12 | ✓ |    |   |    |
| F | 4  | ✓ |    | 11 |   | ✓  |   |    |
| S | 5  |   | ✓  | 10 |   | ✓  |   |    |
| I | 6  | ✓ | ✓  | 9  |   |    |   |    |
| M | 7  |   |    | 8  |   |    |   |    |
| K | 8  |   |    | 7  | ✓ |    |   |    |
| I | 9  | ✓ |    | 6  | ✓ | ✓  |   |    |
| S | 10 |   | ✓  | 5  | ✓ | ✓  |   |    |
| D | 11 |   |    | 4  | ✓ |    |   |    |
| I | 12 | ✓ |    | 3  | ✓ |    |   |    |
| I | 13 | ✓ | ✓  | 2  |   |    |   |    |
| K | 14 | ✓ | ✓  | 1  |   |    |   |    |

「M」 「K」 「V」 「F」 「S」 「I」 「M」 「K」 「I」 「S」 「D」 「I」 「I」 「K」



dbValid true MKVFSIMKISDIIK Oxidation\_M(1),PHOS(2) 2. 916. -1.05872 6.48716 100. ? 4344.  
 S\_Acido\_new%gi68567853|gb|AAy80782.1| MKVFSIMKISDIIK%::::PHOS::Oxidation\_M::PHOS::::%sample\_0%compd\_2637

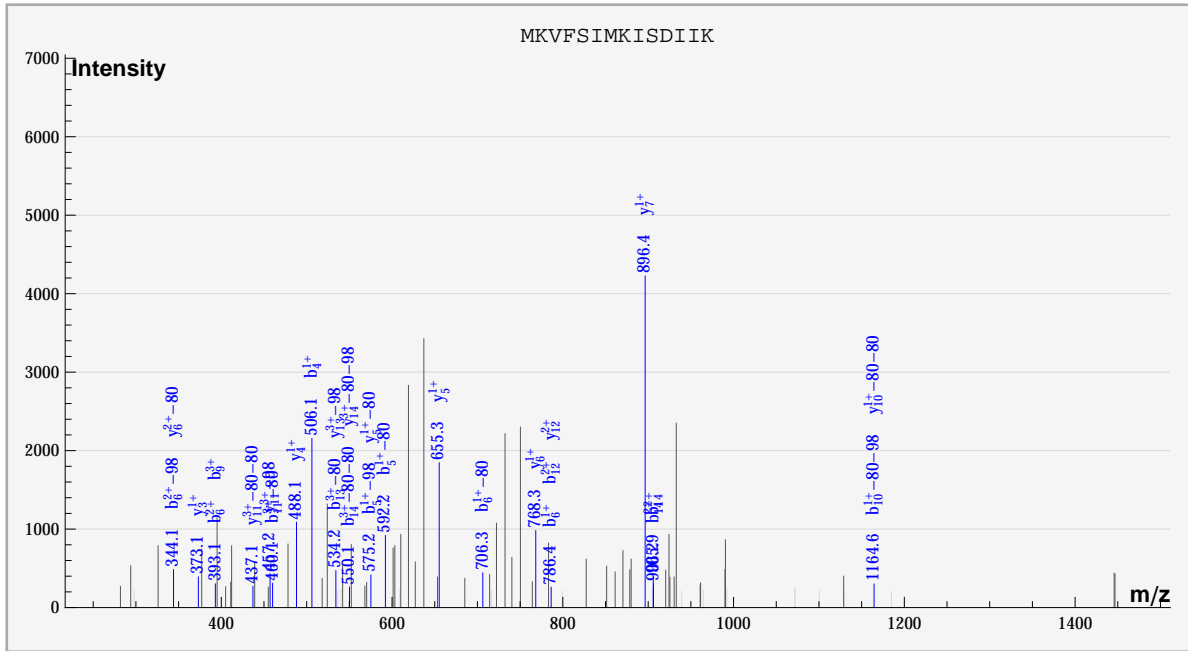

|   | #  | b | b* | #  | y | y* | P | P* |
|---|----|---|----|----|---|----|---|----|
| M | 1  |   |    |    |   |    |   | ✓  |
| K | 2  |   |    | 13 |   | ✓  |   |    |
| V | 3  |   |    | 12 | ✓ |    |   |    |
| F | 4  | ✓ |    | 11 |   | ✓  |   |    |
| S | 5  |   | ✓  | 10 |   | ✓  |   |    |
| I | 6  | ✓ | ✓  | 9  |   |    |   |    |
| M | 7  |   |    | 8  |   |    |   |    |
| K | 8  |   |    | 7  | ✓ |    |   |    |
| I | 9  | ✓ |    | 6  | ✓ | ✓  |   |    |
| S | 10 |   | ✓  | 5  | ✓ | ✓  |   |    |
| D | 11 |   | ✓  | 4  | ✓ |    |   |    |
| I | 12 | ✓ |    | 3  | ✓ |    |   |    |
| I | 13 |   | ✓  | 2  |   |    |   |    |
| K | 14 | ✓ | ✓  | 1  |   |    |   |    |

「M」 「K」 「V」 「F」 「S」 「I」 「M」 「K」 「I」 「S」 「D」 「I」 「I」 「K」

dbValid true MKVFSIMKISDIIK Oxidation\_M(1),PHOS(2) 2. 916. -1.05872 6.63729 100. ? 4356.  
 S\_Acido\_new%gi68567853|gb|AAy80782.1| MKVFSIMKISDIIK%::::PHOS:::Oxidation\_M:::PHOS:::::%sample\_0%compd\_2648

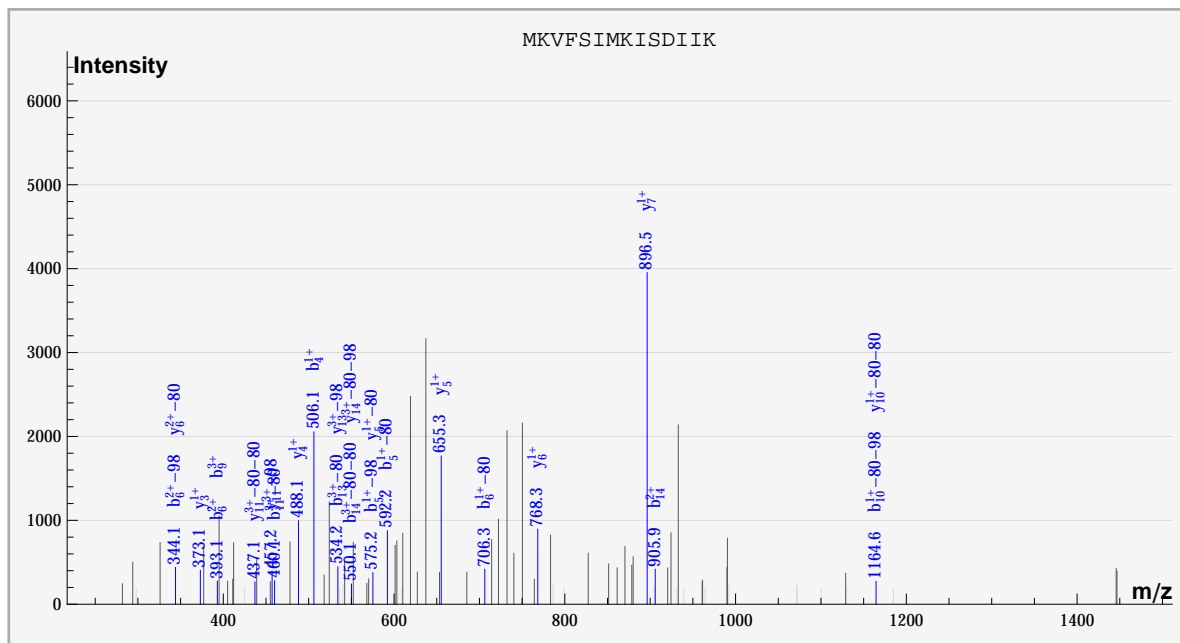

|   | #  | b | b* | #  | y | y* | P | P* |
|---|----|---|----|----|---|----|---|----|
| M | 1  |   |    |    |   |    |   | ✓  |
| K | 2  |   |    | 13 |   |    |   | ✓  |
| V | 3  |   |    | 12 |   |    |   |    |
| F | 4  | ✓ |    | 11 |   |    |   | ✓  |
| S | 5  |   | ✓  | 10 |   |    |   | ✓  |
| I | 6  | ✓ | ✓  | 9  |   |    |   |    |
| M | 7  |   |    | 8  |   |    |   |    |
| K | 8  |   |    | 7  | ✓ |    |   |    |
| I | 9  | ✓ |    | 6  | ✓ | ✓  |   |    |
| S | 10 |   | ✓  | 5  | ✓ | ✓  |   |    |
| D | 11 |   | ✓  | 4  | ✓ |    |   |    |
| I | 12 |   |    | 3  | ✓ |    |   |    |
| I | 13 |   | ✓  | 2  |   |    |   |    |
| K | 14 | ✓ | ✓  | 1  |   |    |   |    |

「M」 「K」 V 「F」 「S」 I 「M」 「K」 「I」 「S」 「D」 「I」 I 「K」

dbValid true MKVFSIMKISDIIK Oxidation\_M(1),PHOS(2) 2. 916. -1.05872 6.66934 100. ? 4368.  
 S\_Acido\_new%g|68567853|g|AAAY80782.1| MKVFSIMKISDIIK%::::PHOS::Oxidation\_M::PHOS::::%sample\_0%compd\_2658

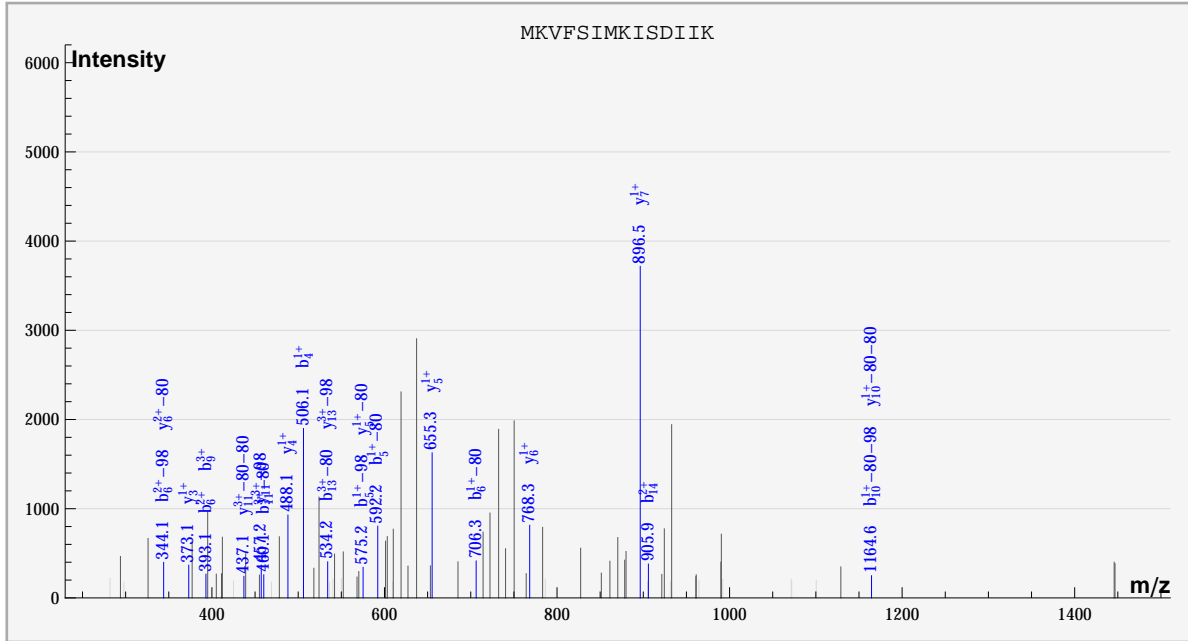

|   | #  | b | b* | #  | y | y* | P | P* |
|---|----|---|----|----|---|----|---|----|
| M | 1  |   |    |    |   |    |   |    |
| K | 2  |   |    | 13 |   | ✓  |   |    |
| V | 3  |   |    | 12 |   |    |   |    |
| F | 4  | ✓ |    | 11 |   | ✓  |   |    |
| S | 5  |   | ✓  | 10 |   | ✓  |   |    |
| I | 6  | ✓ | ✓  | 9  |   |    |   |    |
| M | 7  |   |    | 8  |   |    |   |    |
| K | 8  |   |    | 7  |   | ✓  |   |    |
| I | 9  | ✓ |    | 6  |   | ✓  | ✓ |    |
| S | 10 |   | ✓  | 5  |   | ✓  | ✓ |    |
| D | 11 |   | ✓  | 4  |   | ✓  |   |    |
| I | 12 |   |    | 3  |   | ✓  |   |    |
| I | 13 |   | ✓  | 2  |   |    |   |    |
| K | 14 | ✓ |    | 1  |   |    |   |    |

M [ K V [ F ] S ] I ] M [ K [ I ] S ] D ] I I ] K ]

dbValid true MKVFSIMKISDIK Oxidation\_M(1),PHOS(2) 2. 916. -1.05872 6.40604 100. ? 4380.  
 S\_Acido\_new%gi68567853|gb|AAy80782.1| MKVFSIMKISDIK%::::PHOS:::Oxidation\_M:::PHOS:::::%sample\_0%compd\_2668

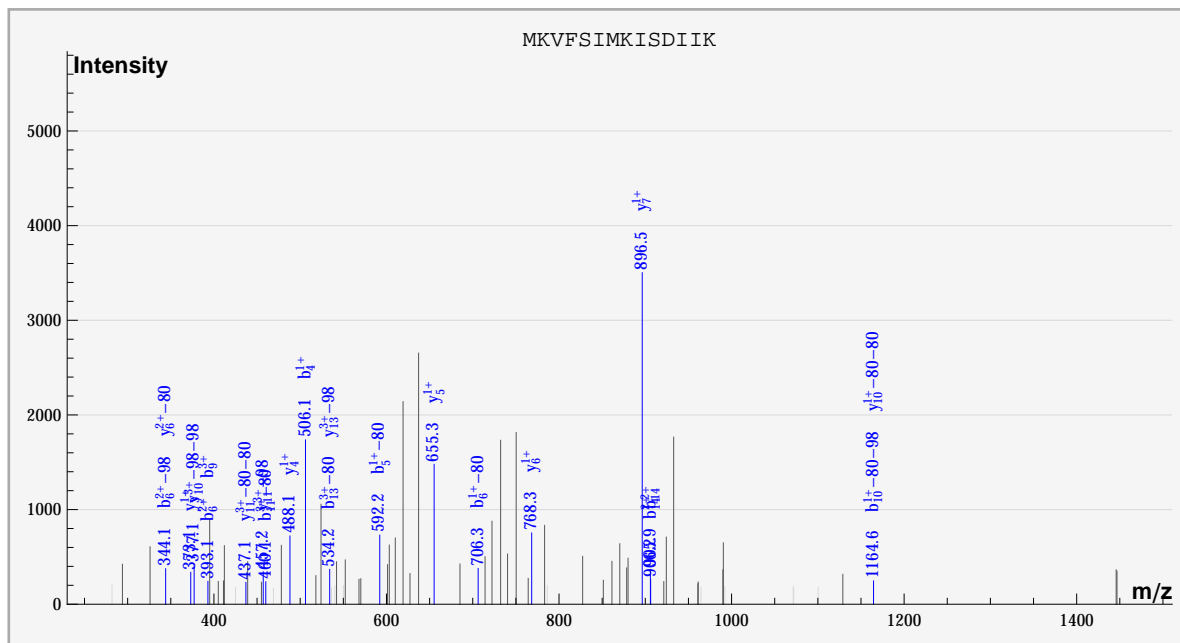

|   | #  | b | b* | #  | y | y* | P | P* |
|---|----|---|----|----|---|----|---|----|
| M | 1  |   |    |    |   |    |   |    |
| K | 2  |   |    | 13 |   | ✓  |   |    |
| V | 3  |   |    | 12 |   |    |   |    |
| F | 4  | ✓ |    | 11 |   | ✓  |   |    |
| S | 5  |   | ✓  | 10 |   | ✓  |   |    |
| I | 6  | ✓ | ✓  | 9  |   |    |   |    |
| M | 7  |   |    | 8  |   |    |   |    |
| K | 8  |   |    | 7  | ✓ |    |   |    |
| I | 9  | ✓ |    | 6  | ✓ | ✓  |   |    |
| S | 10 |   | ✓  | 5  | ✓ |    |   |    |
| D | 11 |   | ✓  | 4  | ✓ |    |   |    |
| I | 12 |   |    | 3  | ✓ |    |   |    |
| I | 13 |   | ✓  | 2  |   |    |   |    |
| K | 14 | ✓ |    | 1  |   |    |   |    |

M [ K V [ F ] S ] I ] M [ K [ I ] S ] D ] I I ] K ]

dbValid true MKVFSIMKISDIK Oxidation\_M(1),PHOS(2) 2. 916. -1.05872 6.51802 100. ? 4392.  
 S\_Acido\_new%gil68567853|gb|AAY80782.1| MKVFSIMKISDIK%::::PHOS:::Oxidation\_M:::PHOS:::::%sample\_0%compd\_2679

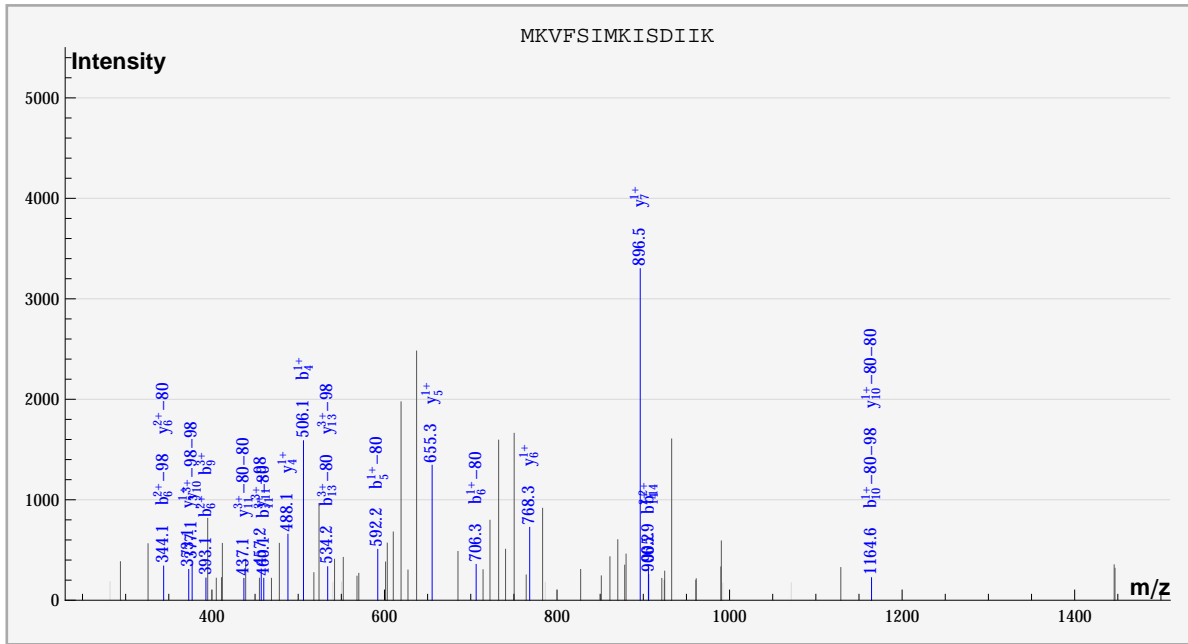

|   | #  | b | b* | #  | y | y* | P | P* |
|---|----|---|----|----|---|----|---|----|
| M | 1  |   |    |    |   |    |   |    |
| K | 2  |   |    | 13 |   | ✓  |   |    |
| V | 3  |   |    | 12 |   |    |   |    |
| F | 4  | ✓ |    | 11 |   | ✓  |   |    |
| S | 5  |   | ✓  | 10 |   | ✓  |   |    |
| I | 6  | ✓ | ✓  | 9  |   |    |   |    |
| M | 7  |   |    | 8  |   |    |   |    |
| K | 8  |   |    | 7  | ✓ |    |   |    |
| I | 9  | ✓ |    | 6  | ✓ | ✓  |   |    |
| S | 10 |   | ✓  | 5  | ✓ |    |   |    |
| D | 11 |   | ✓  | 4  | ✓ |    |   |    |
| I | 12 |   |    | 3  | ✓ |    |   |    |
| I | 13 |   | ✓  | 2  |   |    |   |    |
| K | 14 | ✓ |    | 1  |   |    |   |    |

M [ K V [ F ] S ] I ] M [ K [ I ] S ] D ] I I ] K ]

dbValid true MKVFSIMKISDIIK Oxidation\_M(1),PHOS(2) 2. 916. -1.05872 6.25512 100. ? 4404.  
 S\_Acido\_new%gi68567853|gb|AAY80782.1| MKVFSIMKISDIIK%::::PHOS:::Oxidation\_M:::PHOS:::::%sample\_0%compd\_2689

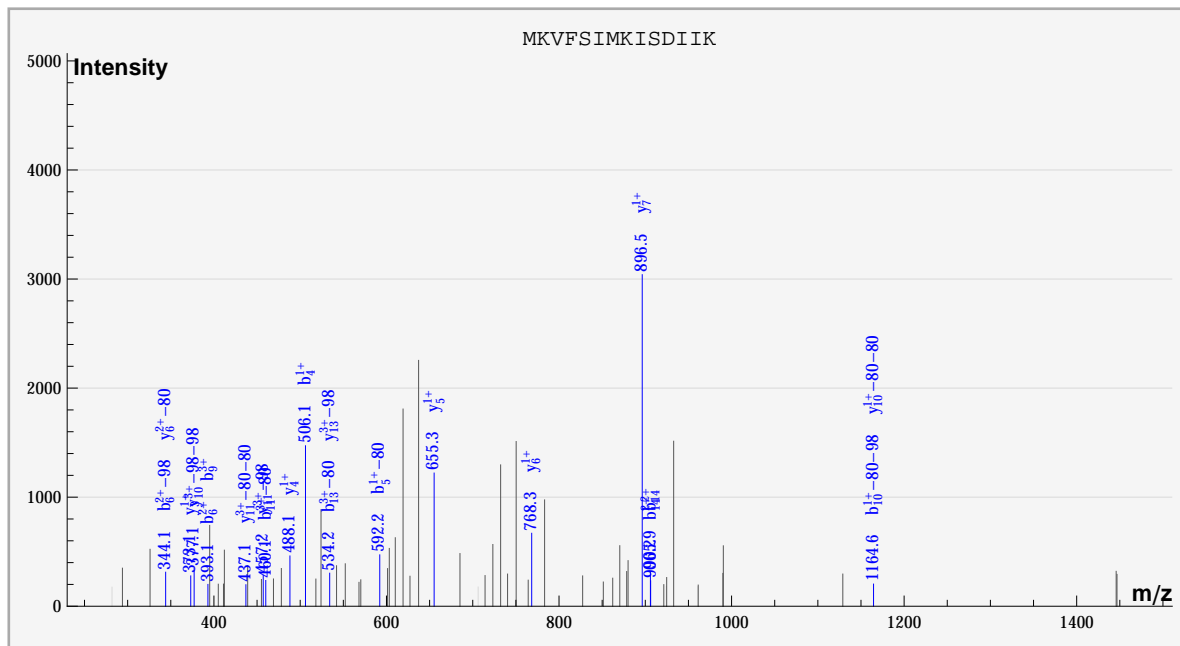

|   | #  | b | b* | #  | y | y* | P | P* |
|---|----|---|----|----|---|----|---|----|
| M | 1  |   |    |    |   |    |   |    |
| K | 2  |   |    | 13 |   | ✓  |   |    |
| V | 3  |   |    | 12 |   |    |   |    |
| F | 4  | ✓ |    | 11 |   | ✓  |   |    |
| S | 5  |   | ✓  | 10 |   | ✓  |   |    |
| I | 6  | ✓ | ✓  | 9  |   |    |   |    |
| M | 7  |   |    | 8  |   |    |   |    |
| K | 8  |   |    | 7  |   | ✓  |   |    |
| I | 9  | ✓ |    | 6  |   | ✓  | ✓ |    |
| S | 10 |   | ✓  | 5  |   | ✓  |   |    |
| D | 11 |   | ✓  | 4  |   | ✓  |   |    |
| I | 12 |   |    | 3  |   | ✓  |   |    |
| I | 13 |   | ✓  | 2  |   |    |   |    |
| K | 14 | ✓ |    | 1  |   |    |   |    |

M [ K V [ F ] S ] I ] M [ K [ I ] S ] D ] I I ] K ]

dbValid true MKVFSIMKISDIIK Oxidation\_M(1),PHOS(2) 2. 916. -1.05872 6.27178 100. ? 4416.

S\_Acido\_new%gil68567853|gb|AAy80782.1| MKVFSIMKISDIIK%::::PHOS:::Oxidation\_M:::PHOS:::::%sample\_0%compd\_2699

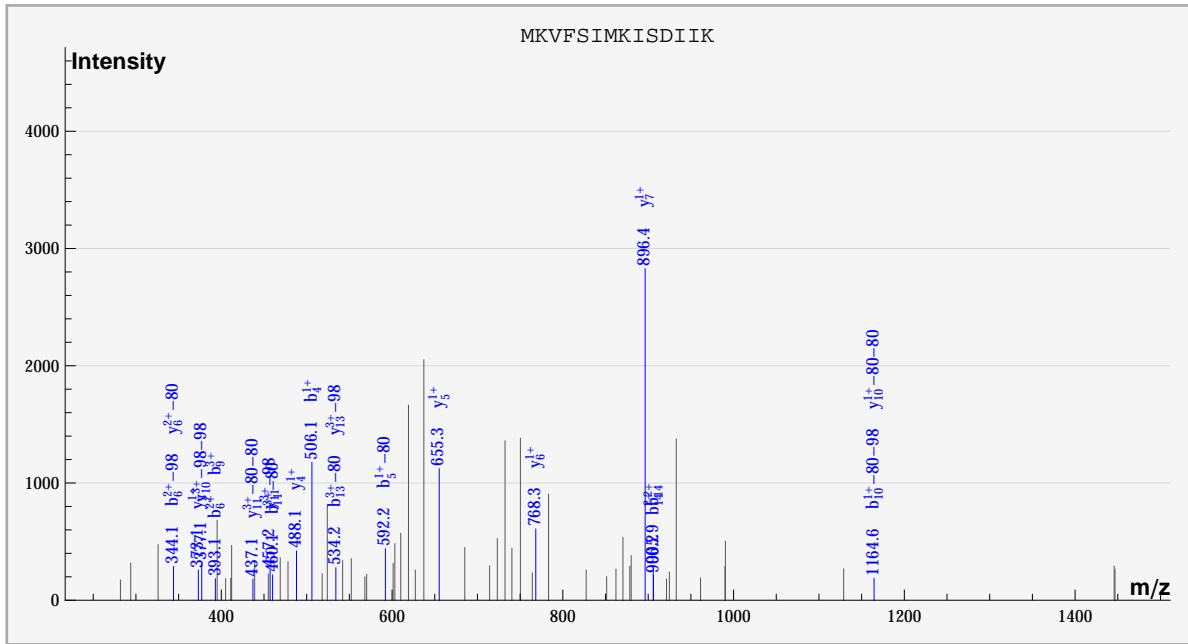

|   | #  | b | b* | #  | y | y* | P | P* |
|---|----|---|----|----|---|----|---|----|
| M | 1  |   |    |    |   |    |   |    |
| K | 2  |   |    | 13 |   | ✓  |   |    |
| V | 3  |   |    | 12 |   |    |   |    |
| F | 4  | ✓ |    | 11 |   | ✓  |   |    |
| S | 5  |   | ✓  | 10 |   | ✓  |   |    |
| I | 6  | ✓ | ✓  | 9  |   |    |   |    |
| M | 7  |   |    | 8  |   |    |   |    |
| K | 8  |   |    | 7  | ✓ |    |   |    |
| I | 9  | ✓ |    | 6  | ✓ | ✓  |   |    |
| S | 10 |   | ✓  | 5  | ✓ |    |   |    |
| D | 11 |   | ✓  | 4  | ✓ |    |   |    |
| I | 12 |   |    | 3  | ✓ |    |   |    |
| I | 13 |   | ✓  | 2  |   |    |   |    |
| K | 14 | ✓ |    | 1  |   |    |   |    |

M K V F S I M K I S D I I K

dbValid true MKVFSIMKISDIIK Oxidation\_M(1),PHOS(2) 2. 916. -1.05872 6.08423 100. ? 4428.  
 S\_Acido\_new%gi|68567853|gb|AAY80782.1| MKVFSIMKISDIIK%:::PHOS::Oxidation\_M:::PHOS:::sample\_0%compd\_2710

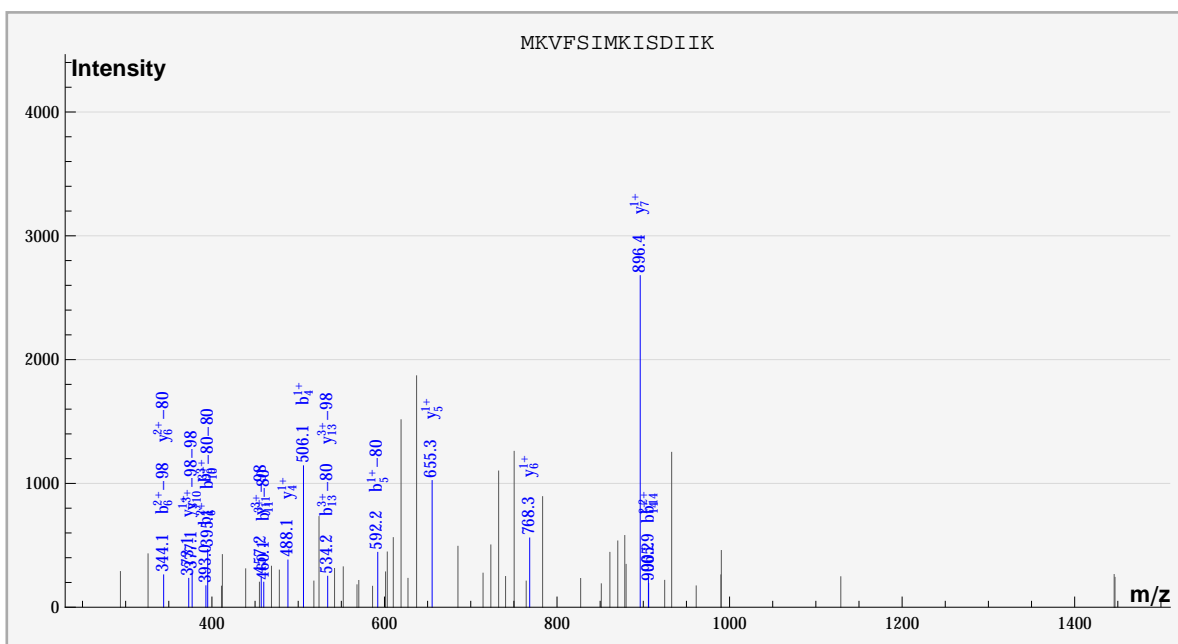

|   | #  | b | b* | #  | y | y* | P | P* |
|---|----|---|----|----|---|----|---|----|
| M | 1  |   |    |    |   |    |   |    |
| K | 2  |   |    | 13 |   | ✓  |   |    |
| V | 3  |   |    | 12 |   |    |   |    |
| F | 4  | ✓ |    | 11 |   | ✓  |   |    |
| S | 5  |   | ✓  | 10 |   | ✓  |   |    |
| I | 6  | ✓ | ✓  | 9  |   |    |   |    |
| M | 7  |   |    | 8  |   |    |   |    |
| K | 8  |   |    | 7  | ✓ |    |   |    |
| I | 9  | ✓ |    | 6  | ✓ | ✓  |   |    |
| S | 10 |   | ✓  | 5  | ✓ |    |   |    |
| D | 11 |   | ✓  | 4  | ✓ |    |   |    |
| I | 12 |   |    | 3  | ✓ |    |   |    |
| I | 13 |   | ✓  | 2  |   |    |   |    |
| K | 14 | ✓ |    | 1  |   |    |   |    |

M [ K V [ F ] S ] I ] M [ K [ I ] S ] D ] I I ] K ]



dbValid true MKVFSIMKISDIK Oxidation\_M(1),PHOS(2) 2. 916. -1.05872 6.2909 100. ? 4440.

S\_Acido\_new%gi68567853|gb|AAY80782.1| MKVFSIMKISDIK%::::PHOS:::Oxidation\_M:::PHOS:::::sample\_0%compd\_2720

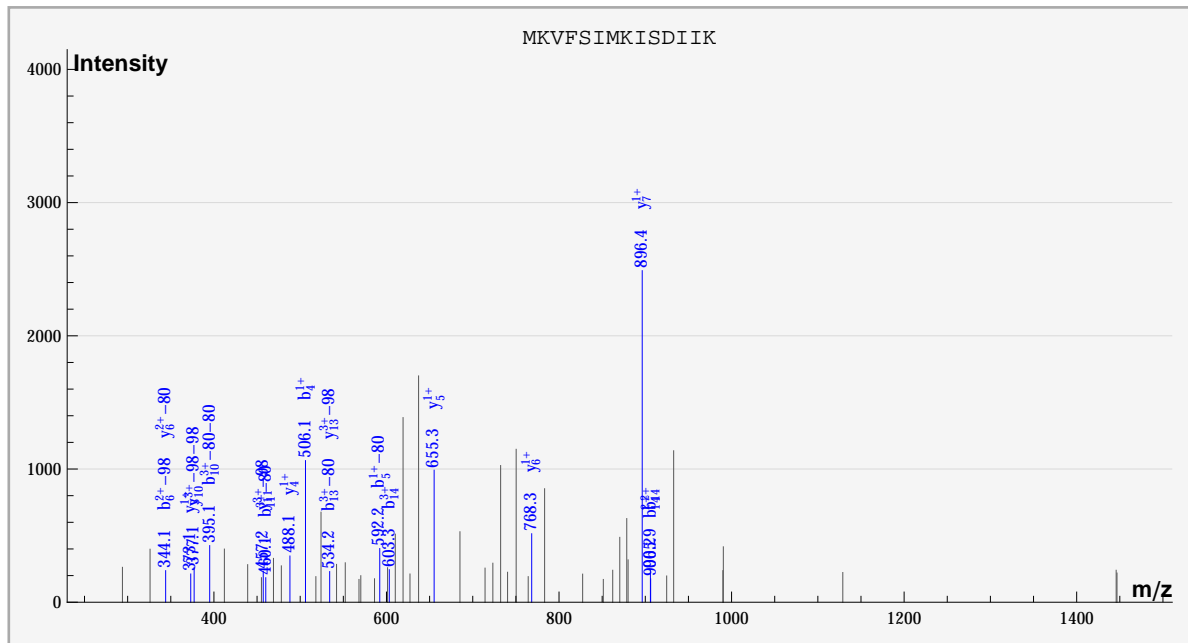

|   | #  | b | b* | #  | y | y* | P | P* |
|---|----|---|----|----|---|----|---|----|
| M | 1  |   |    |    |   |    |   |    |
| K | 2  |   |    | 13 |   | ✓  |   |    |
| V | 3  |   |    | 12 |   |    |   |    |
| F | 4  | ✓ |    | 11 |   | ✓  |   |    |
| S | 5  |   | ✓  | 10 |   | ✓  |   |    |
| I | 6  |   | ✓  | 9  |   |    |   |    |
| M | 7  |   |    | 8  |   |    |   |    |
| K | 8  |   |    | 7  | ✓ |    |   |    |
| I | 9  |   |    | 6  | ✓ | ✓  |   |    |
| S | 10 |   | ✓  | 5  | ✓ |    |   |    |
| D | 11 |   | ✓  | 4  | ✓ |    |   |    |
| I | 12 |   |    | 3  | ✓ |    |   |    |
| I | 13 |   | ✓  | 2  |   |    |   |    |
| K | 14 | ✓ |    | 1  |   |    |   |    |

M K V F S I M K I S D I I K

dbValid true MKVFSIMKISDIIK Oxidation\_M(1),PHOS(2) 2. 916. -1.05872 6.20895 100. ? 4452.  
 S\_Acido\_new%g|68567853|g|AAAY80782.1| MKVFSIMKISDIIK%:::PHOS::Oxidation\_M:::PHOS:::sample\_0%compd\_2730

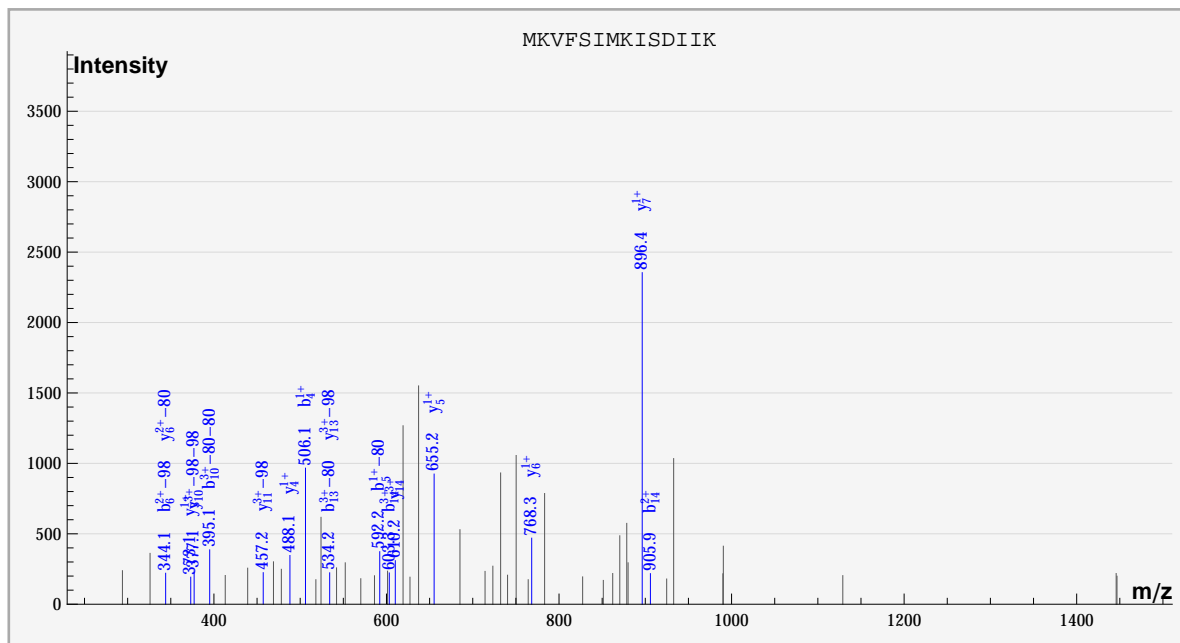

|   | #  | b | b* | #  | y | y* | P | P* |
|---|----|---|----|----|---|----|---|----|
| M | 1  |   |    |    |   |    |   | ✓  |
| K | 2  |   |    | 13 |   |    |   | ✓  |
| V | 3  |   |    | 12 |   |    |   |    |
| F | 4  | ✓ |    | 11 |   |    |   | ✓  |
| S | 5  |   | ✓  | 10 |   |    |   | ✓  |
| I | 6  |   | ✓  | 9  |   |    |   |    |
| M | 7  |   |    | 8  |   |    |   |    |
| K | 8  |   |    | 7  | ✓ |    |   |    |
| I | 9  |   |    | 6  | ✓ | ✓  |   |    |
| S | 10 |   | ✓  | 5  | ✓ |    |   |    |
| D | 11 |   |    | 4  | ✓ |    |   |    |
| I | 12 |   |    | 3  | ✓ |    |   |    |
| I | 13 |   | ✓  | 2  |   |    |   |    |
| K | 14 | ✓ |    | 1  |   |    |   |    |

「M」 「K」 V 「F」 「S」 I 「M」 「K」 「I」 「S」 「D」 「I」 I 「K」

dbValid true MKVFSIMKISDIIK Oxidation\_M(1),PHOS(2) 2. 916. -1.05872 6.38845 100. ? 4464.

S\_Acido\_new%gi68567853|gb|AAY80782.1| MKVFSIMKISDIIK%::::PHOS:::Oxidation\_M:::PHOS:::::%sample\_0%compd\_2741

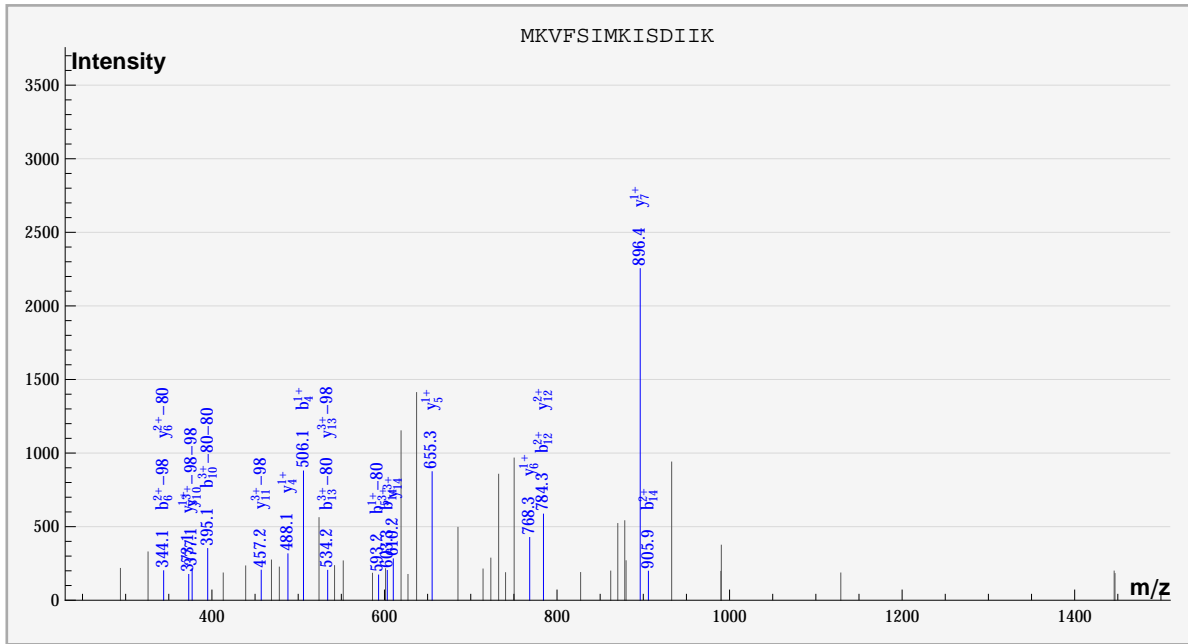

|   | #  | b | b* | #  | y | y* | P | P* |
|---|----|---|----|----|---|----|---|----|
| M | 1  |   |    |    |   |    | ✓ |    |
| K | 2  |   |    | 13 |   |    |   | ✓  |
| V | 3  |   |    | 12 | ✓ |    |   |    |
| F | 4  | ✓ |    | 11 |   |    |   | ✓  |
| S | 5  |   | ✓  | 10 |   |    |   | ✓  |
| I | 6  |   | ✓  | 9  |   |    |   |    |
| M | 7  |   |    | 8  |   |    |   |    |
| K | 8  |   |    | 7  | ✓ |    |   |    |
| I | 9  |   |    | 6  | ✓ | ✓  |   |    |
| S | 10 |   | ✓  | 5  | ✓ |    |   |    |
| D | 11 |   |    | 4  | ✓ |    |   |    |
| I | 12 | ✓ |    | 3  |   | ✓  |   |    |
| I | 13 |   | ✓  | 2  |   |    |   |    |
| K | 14 | ✓ |    | 1  |   |    |   |    |

「M」 「K」 「V」 「F」 「S」 「I」 「M」 「K」 「I」 「S」 「D」 「I」 「I」 「K」

dbValid true MKVFSIMKISDIIK Oxidation\_M(1),PHOS(2) 2. 916. -1.05872 5.72354 100. ? 4476.  
 S\_Acido\_new%g|68567853|g|AAy80782.1| MKVFSIMKISDIIK%:::PHOS::Oxidation\_M:::PHOS:::sample\_0%compd\_2752

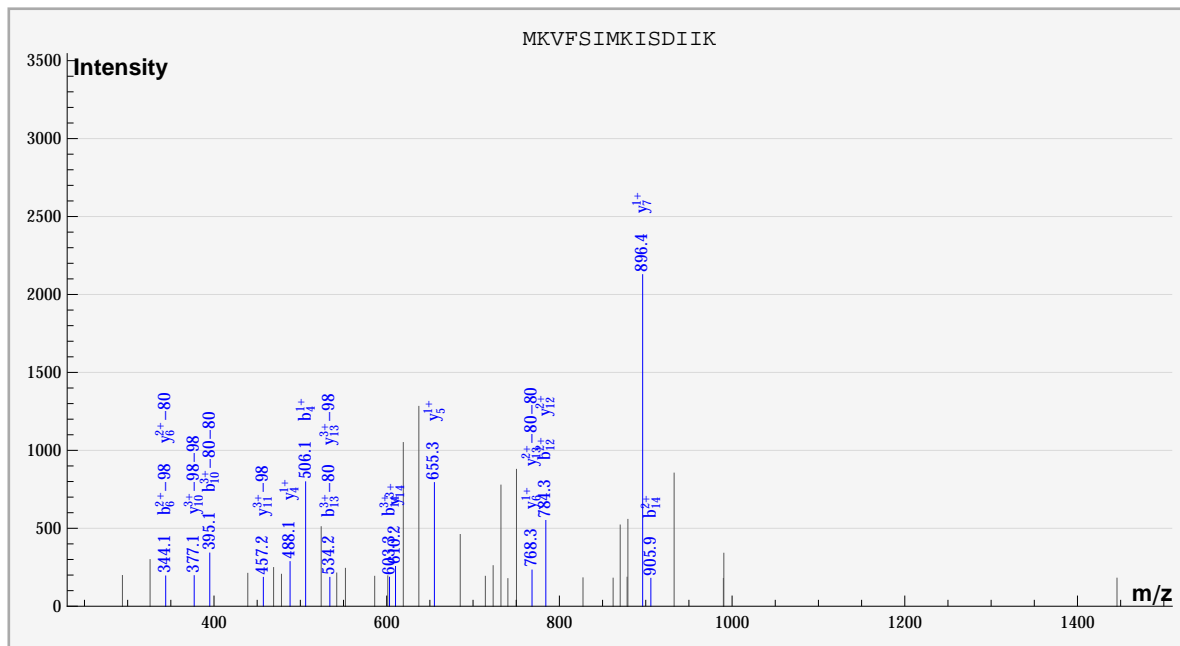

|   | #  | b | b* | #  | y | y* | P | P* |
|---|----|---|----|----|---|----|---|----|
| M | 1  |   |    |    |   |    |   | ✓  |
| K | 2  |   |    | 13 |   |    |   | ✓  |
| V | 3  |   |    | 12 | ✓ |    |   |    |
| F | 4  | ✓ |    | 11 |   | ✓  |   |    |
| S | 5  |   |    | 10 |   | ✓  |   |    |
| I | 6  |   | ✓  | 9  |   |    |   |    |
| M | 7  |   |    | 8  |   |    |   |    |
| K | 8  |   |    | 7  | ✓ |    |   |    |
| I | 9  |   |    | 6  | ✓ | ✓  |   |    |
| S | 10 |   | ✓  | 5  | ✓ |    |   |    |
| D | 11 |   |    | 4  | ✓ |    |   |    |
| I | 12 | ✓ |    | 3  |   |    |   |    |
| I | 13 |   | ✓  | 2  |   |    |   |    |
| K | 14 | ✓ |    | 1  |   |    |   |    |

[M][K][V][F][S][I][M][K][I][S][D][I][I][K]

dbValid true MKVFSIMKISDIK Oxidation\_M(1),PHOS(2) 2. 916. -1.05872 5.65157 100. ? 4488.

S\_Acido\_new%g|68567853|gb|AAY80782.1| MKVFSIMKISDIK%::::PHOS:::Oxidation\_M:::PHOS:::::%sample\_0%compd\_2762

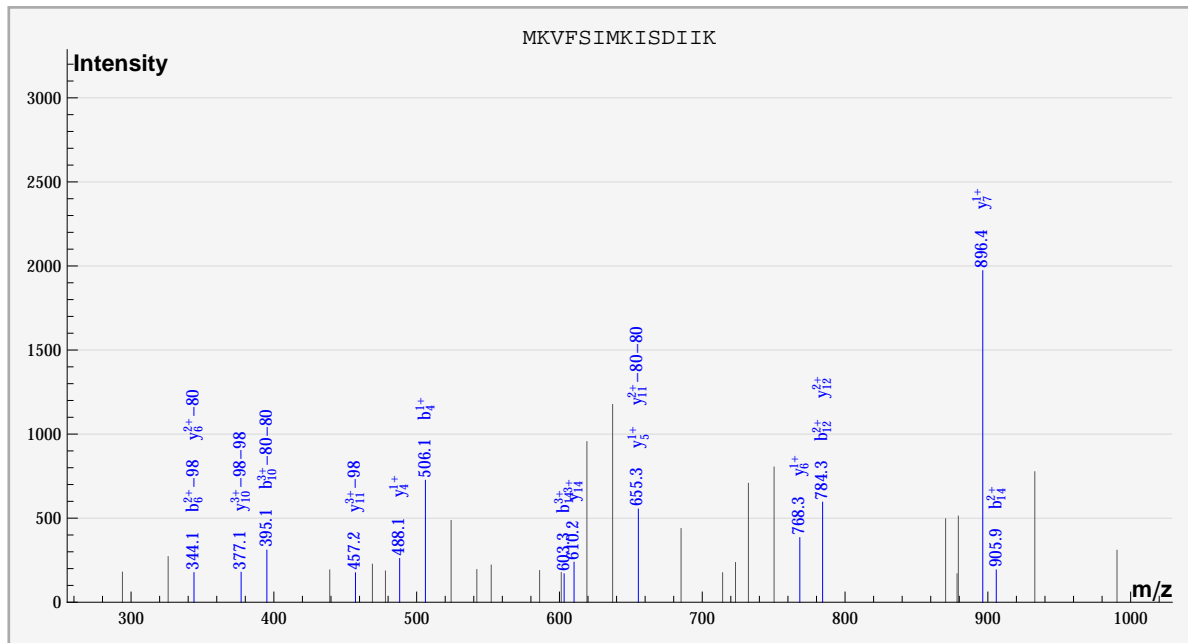

|   | #  | b | b* | #  | y | y* | P | P* |
|---|----|---|----|----|---|----|---|----|
| M | 1  |   |    |    |   |    |   | ✓  |
| K | 2  |   |    | 13 |   |    |   |    |
| V | 3  |   |    | 12 | ✓ |    |   |    |
| F | 4  | ✓ |    | 11 |   | ✓  |   |    |
| S | 5  |   |    | 10 |   | ✓  |   |    |
| I | 6  |   | ✓  | 9  |   |    |   |    |
| M | 7  |   |    | 8  |   |    |   |    |
| K | 8  |   |    | 7  | ✓ |    |   |    |
| I | 9  |   |    | 6  | ✓ | ✓  |   |    |
| S | 10 |   | ✓  | 5  | ✓ |    |   |    |
| D | 11 |   |    | 4  | ✓ |    |   |    |
| I | 12 | ✓ |    | 3  |   |    |   |    |
| I | 13 |   |    | 2  |   |    |   |    |
| K | 14 | ✓ |    | 1  |   |    |   |    |

「M K 「V 「F」S I」M 「K 「I 「S」D I」I K」

dbValid true MKVFSIMKISDIK Oxidation\_M(1),PHOS(2) 2. 916. -1.05872 5.32484 100. ? 4500.  
 S\_Acido\_new%gi68567853|gb|AAY80782.1| MKVFSIMKISDIK%:::PHOS::Oxidation\_M:::PHOS:::sample\_0%compd\_2772

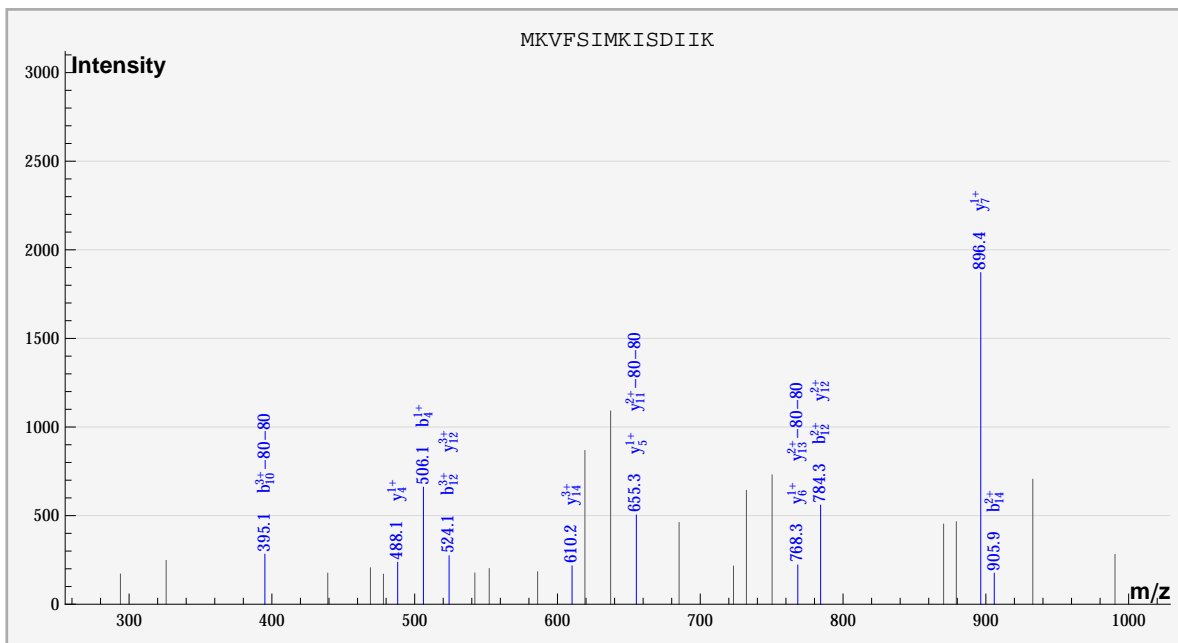

|   | #  | b | b* | #  | y | y* | P | P* |
|---|----|---|----|----|---|----|---|----|
| M | 1  |   |    |    |   |    | ✓ |    |
| K | 2  |   |    | 13 |   | ✓  |   |    |
| V | 3  |   |    | 12 | ✓ |    |   |    |
| F | 4  | ✓ |    | 11 |   | ✓  |   |    |
| S | 5  |   |    | 10 |   |    |   |    |
| I | 6  |   |    | 9  |   |    |   |    |
| M | 7  |   |    | 8  |   |    |   |    |
| K | 8  |   |    | 7  | ✓ |    |   |    |
| I | 9  |   |    | 6  | ✓ |    |   |    |
| S | 10 |   | ✓  | 5  | ✓ |    |   |    |
| D | 11 |   |    | 4  | ✓ |    |   |    |
| I | 12 | ✓ |    | 3  |   |    |   |    |
| I | 13 |   |    | 2  |   |    |   |    |
| K | 14 | ✓ |    | 1  |   |    |   |    |

「M」 「K」 「V」 「F」 S I M 「K」 「I」 「S」 「D」 I 「I」 K 「」

dbValid true GSSWYR PHOS(2) 1. 917. -1.72028 5.42319 100. ? 3258.  
 S\_Acido\_new%gil68568626|gb|AAY81555.1| GSSWYR%::PHOS::PHOS::%sample\_0%cmpd\_1865

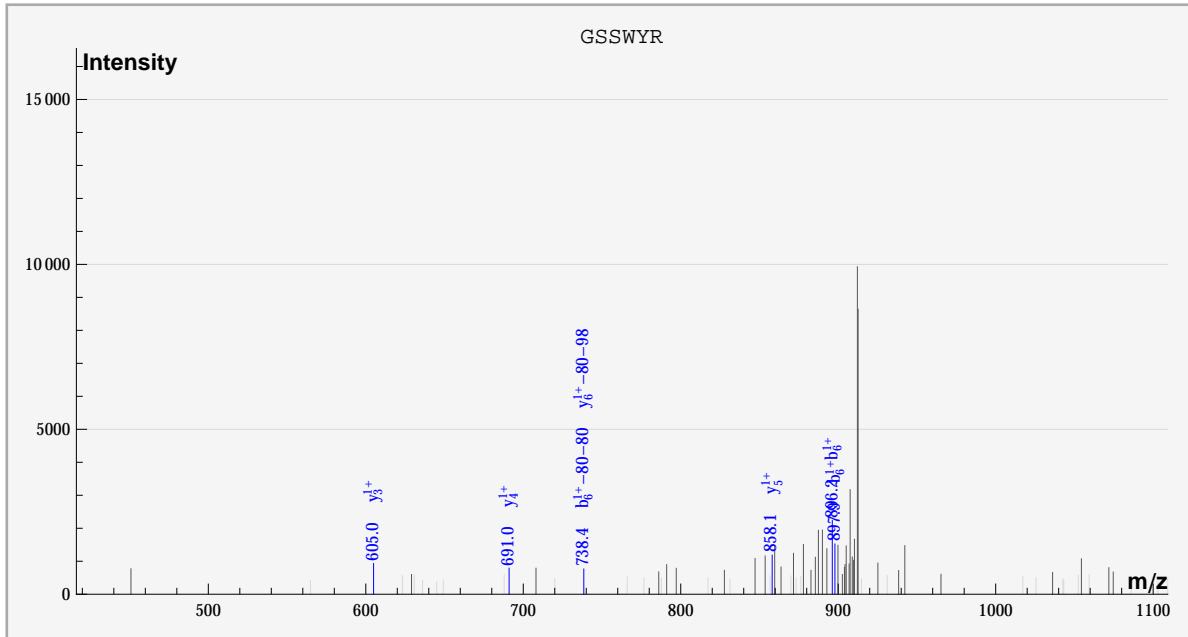

|   | # | b | b* | # | y | y* | P | P* |
|---|---|---|----|---|---|----|---|----|
| G | 1 |   |    |   |   |    |   | ✓  |
| S | 2 |   |    | 5 | ✓ |    |   |    |
| S | 3 |   |    | 4 | ✓ |    |   |    |
| W | 4 |   |    | 3 | ✓ |    |   |    |
| Y | 5 |   |    | 2 |   |    |   |    |
| R | 6 | ✓ | ✓  | 1 |   |    |   |    |

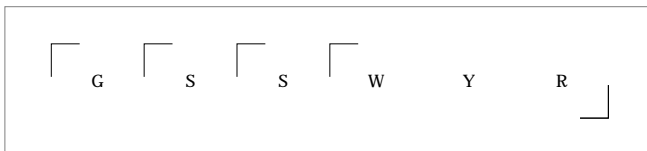

dbValid true YKITQGK PHOS(1) 1. 919. -1.55082 5.70786 100. ? 1980.  
 S\_Acido\_new%gi|68567792|gb|AAY80721.1| YKITQGK%:PHOS::::::%sample\_0%cmpd\_702

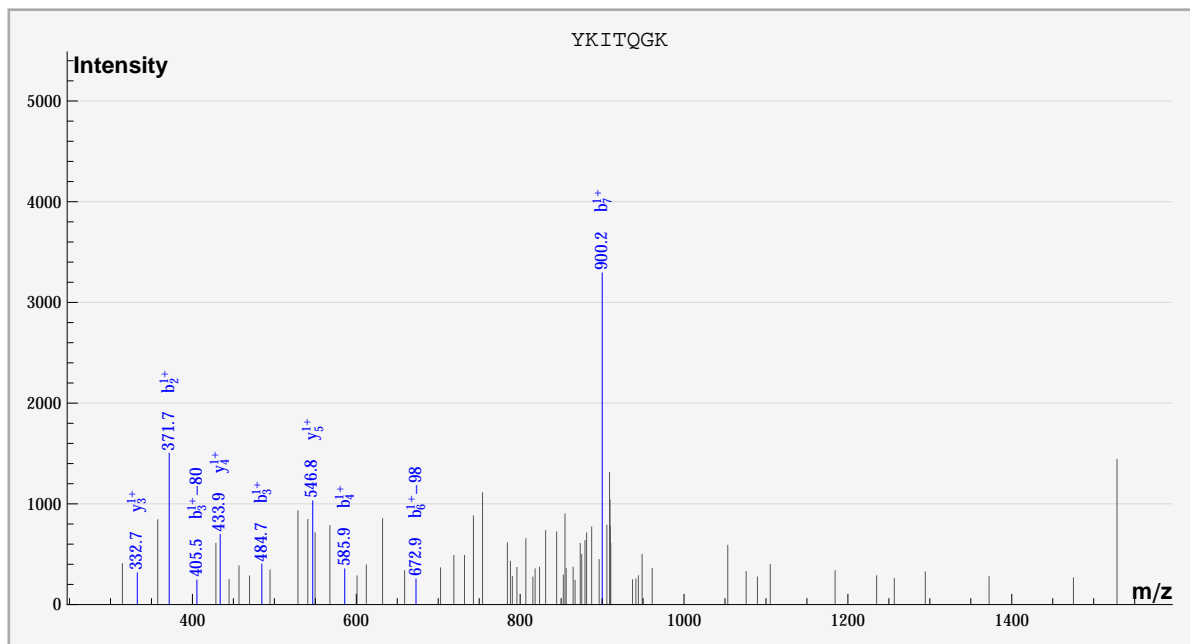

|   | # | b | b* | # | y | y* | P | P* |
|---|---|---|----|---|---|----|---|----|
| Y | 1 |   |    |   |   |    |   |    |
| K | 2 | ✓ |    | 6 |   |    |   |    |
| I | 3 | ✓ | ✓  | 5 | ✓ |    |   |    |
| T | 4 | ✓ |    | 4 | ✓ |    |   |    |
| Q | 5 |   |    | 3 | ✓ |    |   |    |
| G | 6 |   | ✓  | 2 |   |    |   |    |
| K | 7 | ✓ |    | 1 |   |    |   |    |

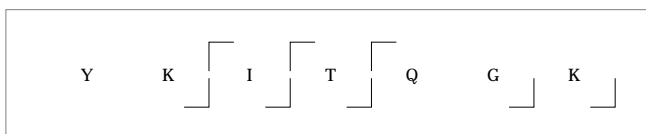



dbValid true KYIEELGDLYYDR PHOS(2) 2. 919. -0.121753 5.11146 100. ? 2502.

S\_Acido\_new%gi|68566850|gb|AA79779.1| KYIEELGDLYYDR%:::PHOS:PHOS::%sample\_3%compd\_1163

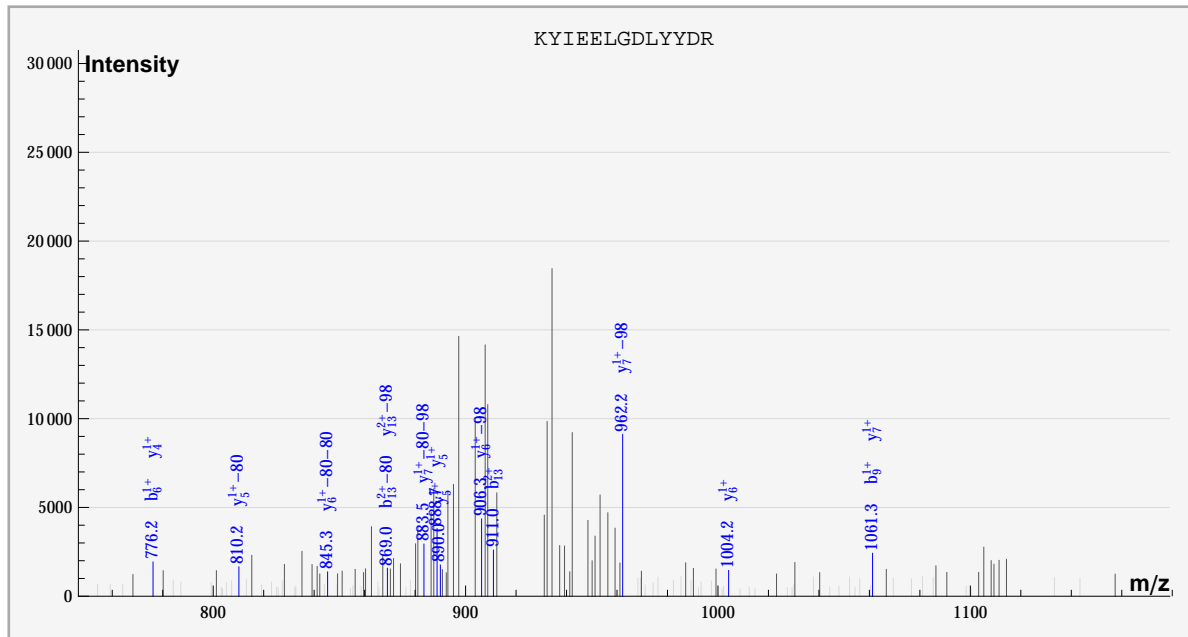

|   | #  | b | b* | #  | y | y* | P | P* |
|---|----|---|----|----|---|----|---|----|
| K | 1  |   |    |    |   |    |   | ✓  |
| Y | 2  |   |    | 12 |   |    |   |    |
| I | 3  |   |    | 11 |   |    |   |    |
| E | 4  |   |    | 10 |   |    |   |    |
| E | 5  |   |    | 9  |   |    |   |    |
| L | 6  | ✓ |    | 8  |   |    |   |    |
| G | 7  |   |    | 7  | ✓ | ✓  |   |    |
| D | 8  |   |    | 6  | ✓ | ✓  |   |    |
| L | 9  | ✓ |    | 5  | ✓ | ✓  |   |    |
| Y | 10 |   |    | 4  | ✓ |    |   |    |
| Y | 11 |   |    | 3  |   |    |   |    |
| D | 12 |   |    | 2  |   |    |   |    |
| R | 13 | ✓ | ✓  | 1  |   |    |   |    |

「 K Y I E E L 」 「 G 」 「 D 」 「 L 」 「 Y Y D R 」

dbValid true FEKVVIGYAMDYR PHOS(1) 2. 919. -1.58231 5.07188 100. ? 4080.  
 S\_Acido\_new%gil68566998|gb|AAY79927.1| FEKVVIGYAMDYR%:::PHOS:::sample\_0%compd\_2624

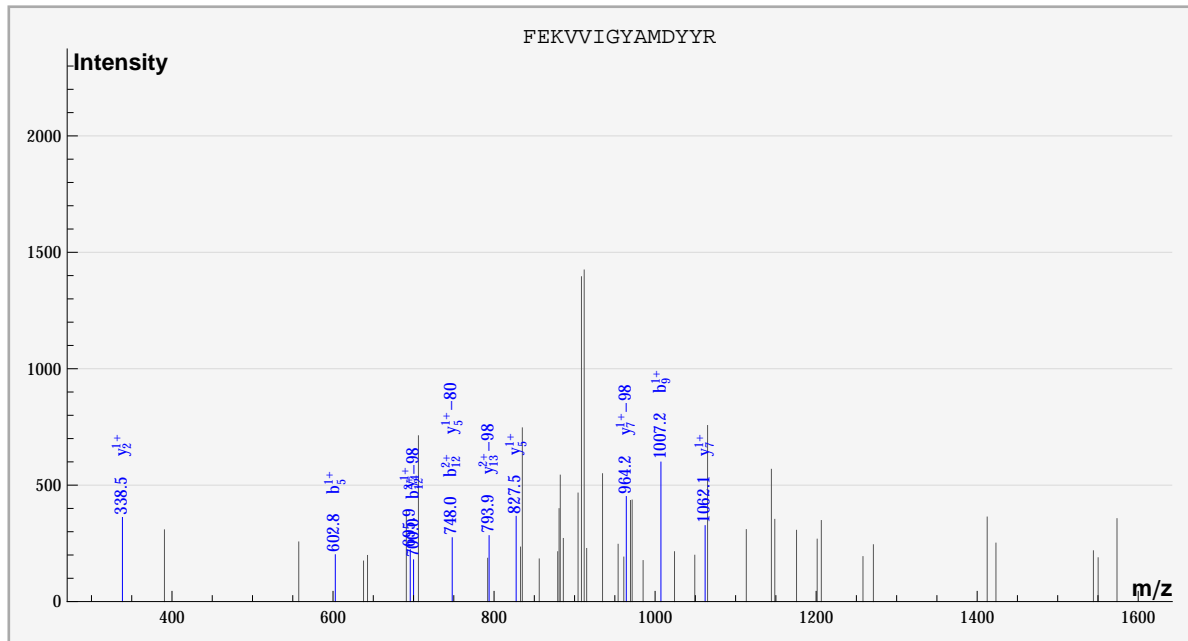

|   | #  | b | b* | #  | y | y* | P | P* |
|---|----|---|----|----|---|----|---|----|
| F | 1  |   |    |    |   |    |   |    |
| E | 2  |   |    | 13 |   | ✓  |   |    |
| K | 3  |   |    | 12 |   |    |   |    |
| V | 4  |   |    | 11 |   |    |   |    |
| V | 5  | ✓ |    | 10 |   |    |   |    |
| I | 6  |   |    | 9  |   |    |   |    |
| G | 7  |   |    | 8  |   |    |   |    |
| Y | 8  |   |    | 7  | ✓ | ✓  |   |    |
| A | 9  | ✓ |    | 6  |   |    |   |    |
| M | 10 |   |    | 5  | ✓ | ✓  |   |    |
| D | 11 |   |    | 4  | ✓ |    |   |    |
| Y | 12 | ✓ | ✓  | 3  |   |    |   |    |
| Y | 13 |   |    | 2  | ✓ |    |   |    |
| R | 14 |   |    | 1  |   |    |   |    |

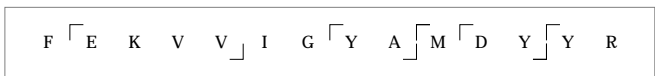

dbValid true TTFAQALAEFYTR PHOS(4) 2. 920. -0.184403 5.70598 100. ? 1614.

S\_Acido\_new%gi|68567941|gb|AAy80870.1| TTFAQALAEFYTR%:PHOS:PHOS:::PHOS:PHOS::%sample\_2%cmpd\_355

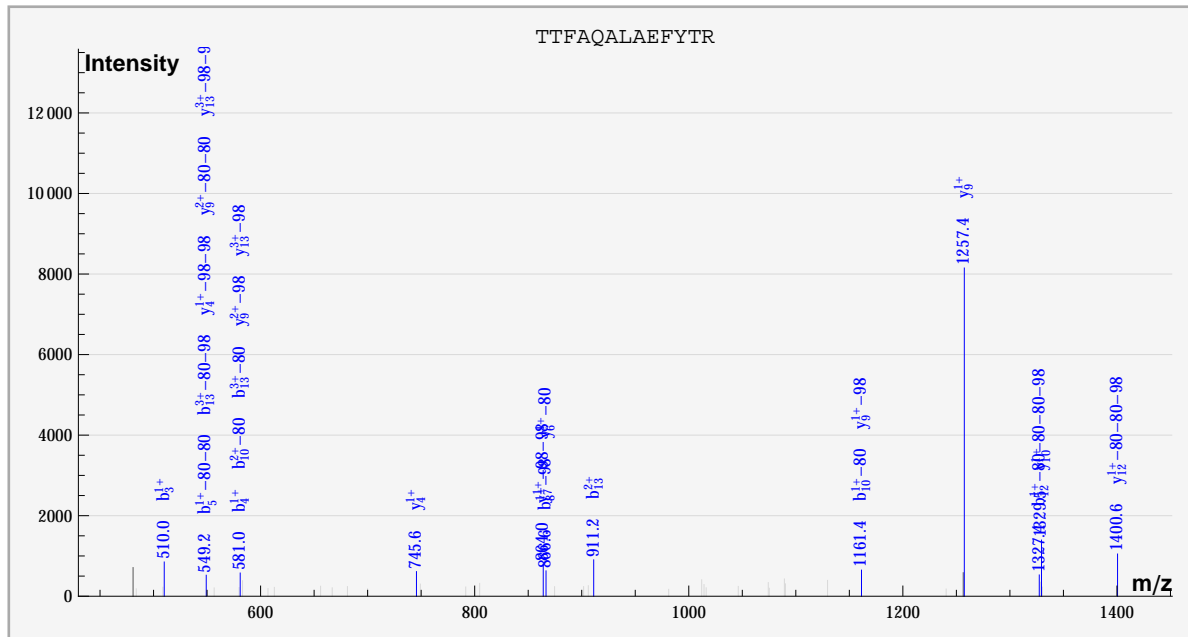

|   | #  | b | b* | #  | y | y* | P | P* |
|---|----|---|----|----|---|----|---|----|
| T | 1  |   |    |    |   |    |   | ✓  |
| T | 2  |   |    | 12 |   | ✓  |   |    |
| F | 3  | ✓ |    | 11 |   |    |   |    |
| A | 4  | ✓ |    | 10 | ✓ |    |   |    |
| Q | 5  |   | ✓  | 9  | ✓ | ✓  |   |    |
| A | 6  |   |    | 8  |   |    |   |    |
| L | 7  |   |    | 7  |   | ✓  |   |    |
| A | 8  |   | ✓  | 6  |   | ✓  |   |    |
| E | 9  |   |    | 5  |   |    |   |    |
| F | 10 |   | ✓  | 4  | ✓ | ✓  |   |    |
| Y | 11 |   |    | 3  |   |    |   |    |
| T | 12 |   | ✓  | 2  |   |    |   |    |
| R | 13 | ✓ | ✓  | 1  |   |    |   |    |

TTFAQALAEFYTR

dbValid true YVKISGWSATEAKNR PHOS(1) 2. 922. 1.94599 5.34919 100. ? 2364.  
 S\_Acido\_new%gil68567388|gb|AAy80317.1| YVKISGWSATEAKNR%::::PHOS::::::::::%sample\_2%compd\_1045

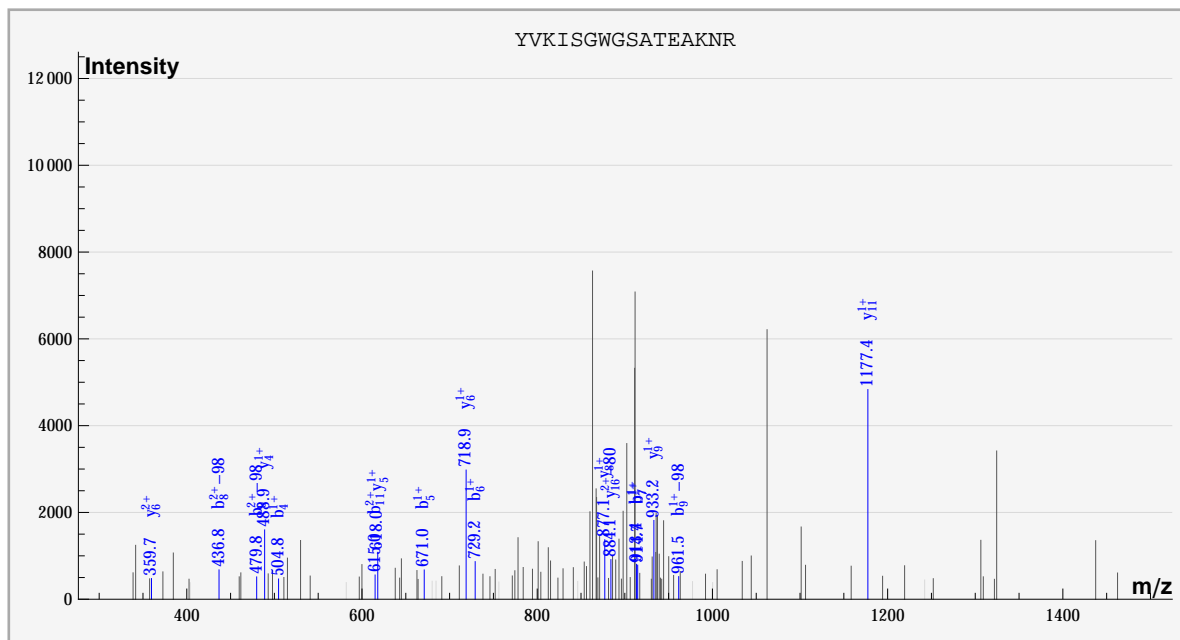

|   | #  | b | b* | #  | y | y* | P | P* |
|---|----|---|----|----|---|----|---|----|
| Y | 1  |   |    |    |   |    |   | ✓  |
| V | 2  |   |    | 15 |   |    |   |    |
| K | 3  |   |    | 14 |   |    |   |    |
| I | 4  | ✓ |    | 13 |   |    |   |    |
| S | 5  | ✓ |    | 12 |   |    |   |    |
| G | 6  | ✓ |    | 11 | ✓ |    |   |    |
| W | 7  | ✓ |    | 10 |   |    |   |    |
| G | 8  |   | ✓  | 9  | ✓ |    |   |    |
| S | 9  |   | ✓  | 8  | ✓ |    |   |    |
| A | 10 |   |    | 7  |   |    |   |    |
| T | 11 | ✓ |    | 6  | ✓ |    |   |    |
| E | 12 |   |    | 5  | ✓ |    |   |    |
| A | 13 |   |    | 4  | ✓ |    |   |    |
| K | 14 |   |    | 3  |   |    |   |    |
| N | 15 |   |    | 2  |   |    |   |    |
| R | 16 |   |    | 1  |   |    |   |    |

Y V K I S G W G S A T E A K N R

dbValid true TWLMYK PHOS(1) 1. 923. -1.60602 5.36344 100. ? 4260.  
 S\_Acido\_new%gi|68567318|gb|AAY80247.1| TWLMYK%:::::PHOS::%sample\_2%compd\_2791

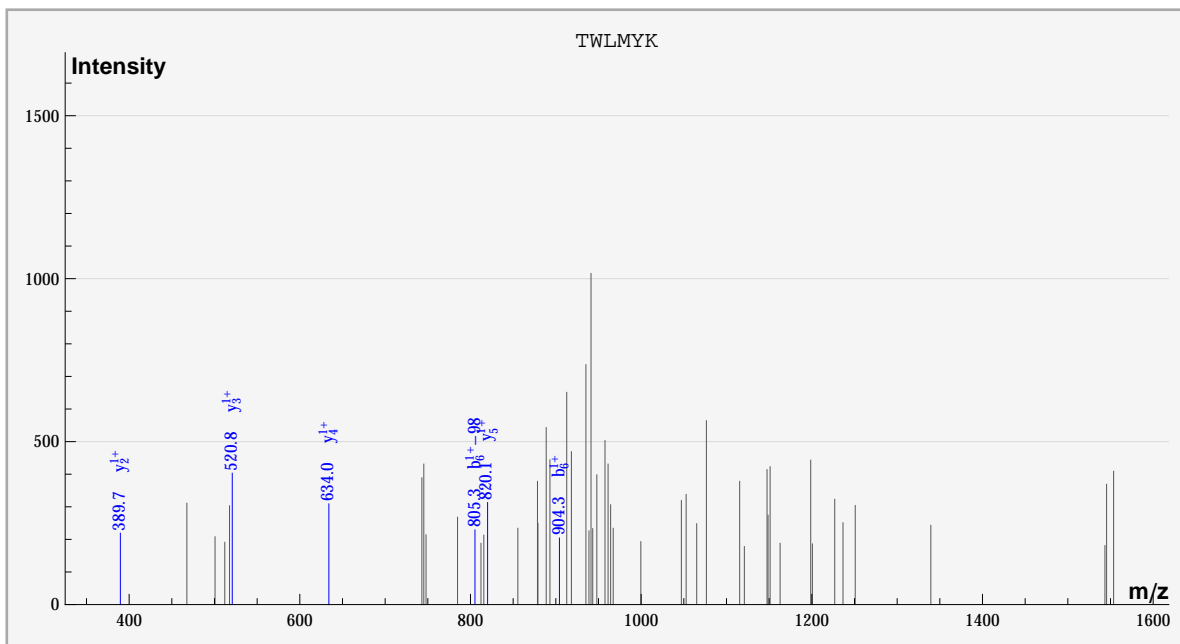

|   | # | b | b* | # | y | y* | P | P* |
|---|---|---|----|---|---|----|---|----|
| T | 1 |   |    |   |   |    |   |    |
| W | 2 |   |    | 5 | ✓ |    |   |    |
| L | 3 |   |    | 4 | ✓ |    |   |    |
| M | 4 |   |    | 3 | ✓ |    |   |    |
| Y | 5 |   |    | 2 | ✓ |    |   |    |
| K | 6 | ✓ | ✓  | 1 |   |    |   |    |

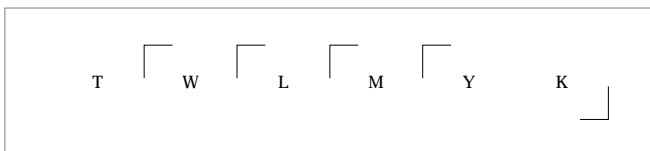

dbValid true SINTLLGK PHOS(1) 1. 924. 1.4754 5.27071 100. ? 2550.

S\_Acido\_new%gi|68568201|gb|AAY81130.1| SINTLLGK%:PHOS:::::sample\_2%cmpd\_1214

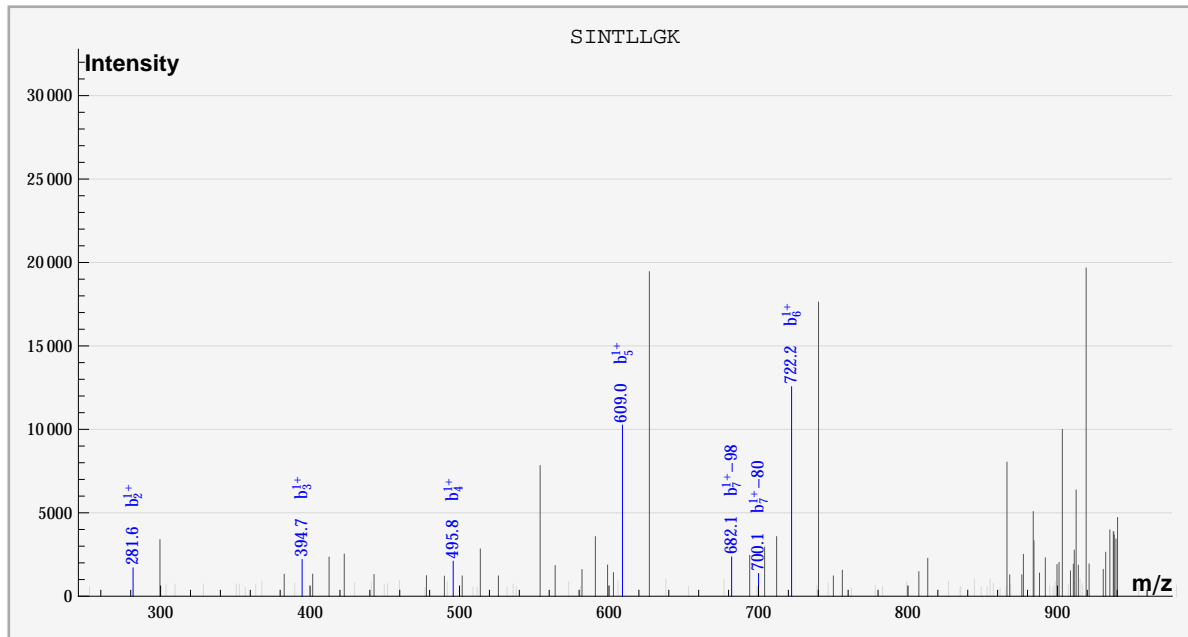

|   | # | b | b* | # | y | y* | P | P* |
|---|---|---|----|---|---|----|---|----|
| S | 1 |   |    |   |   |    |   |    |
| I | 2 | ✓ |    | 7 |   |    |   |    |
| N | 3 | ✓ |    | 6 |   |    |   |    |
| T | 4 | ✓ |    | 5 |   |    |   |    |
| L | 5 | ✓ |    | 4 |   |    |   |    |
| L | 6 | ✓ |    | 3 |   |    |   |    |
| G | 7 |   | ✓  | 2 |   |    |   |    |
| K | 8 |   |    | 1 |   |    |   |    |

S I \_ N \_ T \_ L \_ L \_ G \_ K

dbValid true MSIIIGAPR PHOS(1) 1. 924. 0.437235 5.76429 100. ? 2562.  
 S\_Acido\_new%gi|68568073|gb|AAY81002.1| MSIIIGAPR%::PHOS:::sample\_2%cmpd\_1226

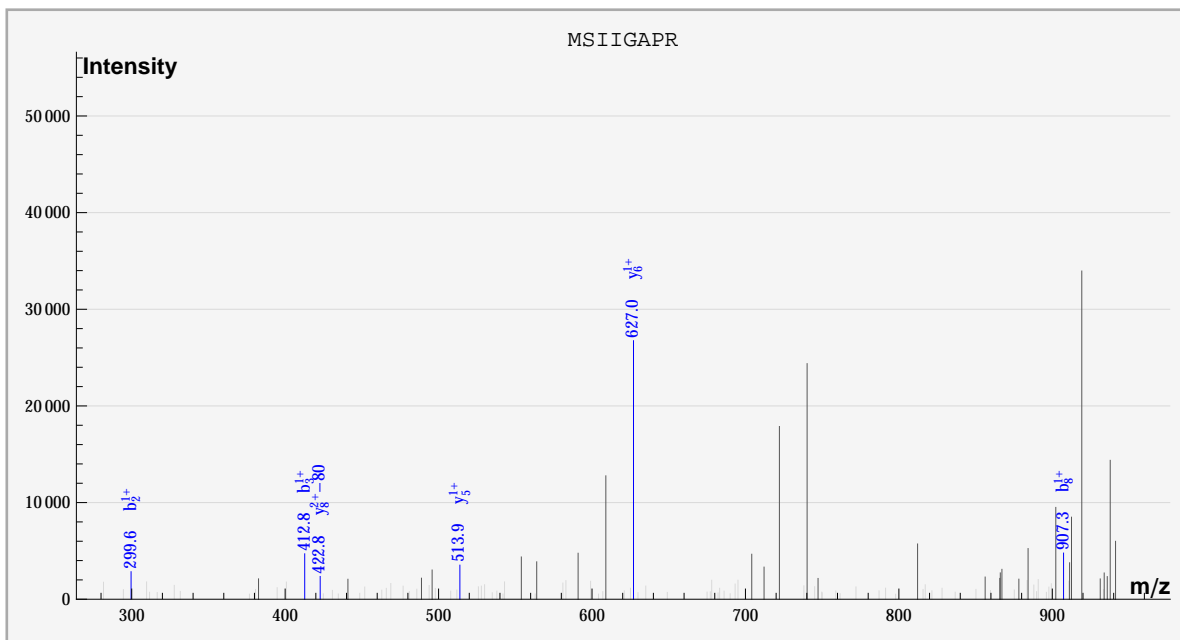

|   | # | b | b* | # | y | y* | P | P* |
|---|---|---|----|---|---|----|---|----|
| M | 1 |   |    |   |   |    |   | ✓  |
| S | 2 | ✓ |    | 7 |   |    |   |    |
| I | 3 | ✓ |    | 6 | ✓ |    |   |    |
| I | 4 |   |    | 5 | ✓ |    |   |    |
| G | 5 |   |    | 4 |   |    |   |    |
| A | 6 |   |    | 3 |   |    |   |    |
| P | 7 |   |    | 2 |   |    |   |    |
| R | 8 | ✓ |    | 1 |   |    |   |    |

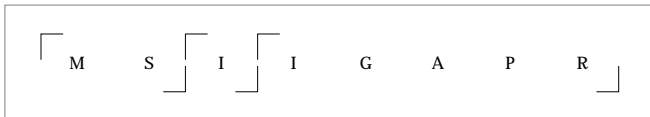

dbValid true DELFRY PHOS(1) 1. 924. -1.62941 5.38599 100. ? 4500.  
 S\_Acido\_new%gi|68567547|gb|AAY80476.1| DELFRY%:::PHOS:%sample\_2%compd\_3014

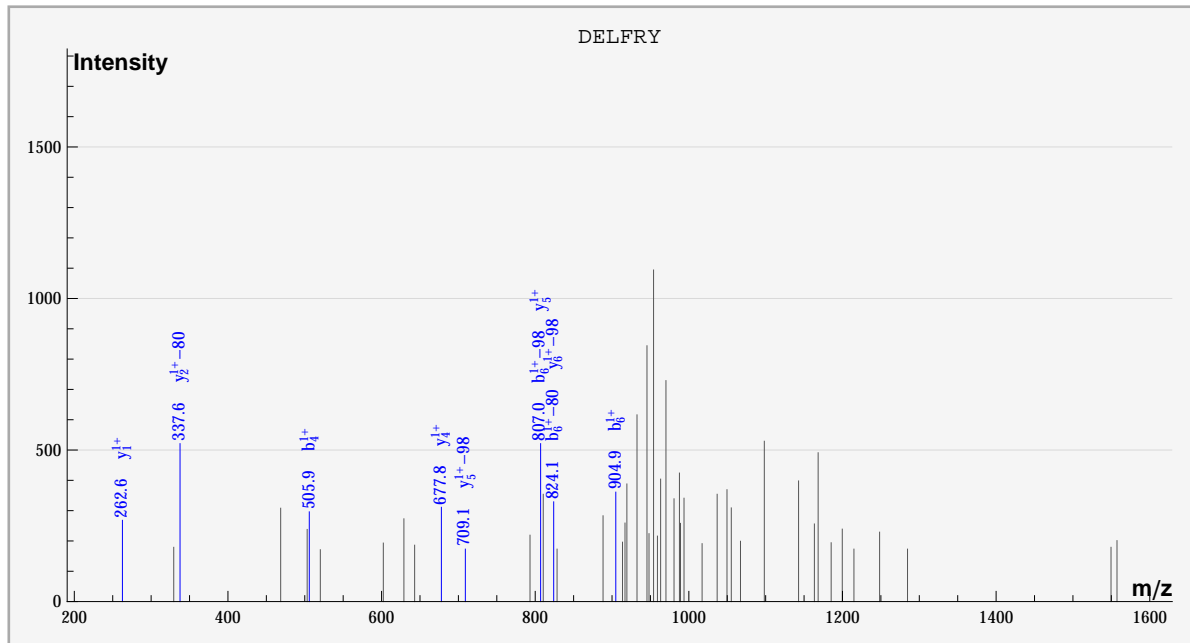

|   | # | b | b* | # | y | y* | P | P* |
|---|---|---|----|---|---|----|---|----|
| D | 1 |   |    |   |   |    |   | ✓  |
| E | 2 |   |    | 5 | ✓ | ✓  |   |    |
| L | 3 |   |    | 4 | ✓ |    |   |    |
| F | 4 | ✓ |    | 3 |   |    |   |    |
| R | 5 |   |    | 2 |   | ✓  |   |    |
| Y | 6 | ✓ | ✓  | 1 | ✓ |    |   |    |

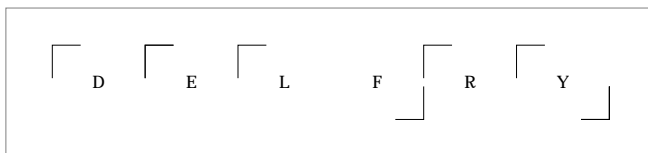



dbValid true IREVISK PHOS(1) 1. 926. -1.50863 5.32948 100. ? 1776.  
 S\_Acido\_new%gi|68566702|gb|AAY79631.1| IREVISK%:::PHOS::%sample\_2%compd\_505

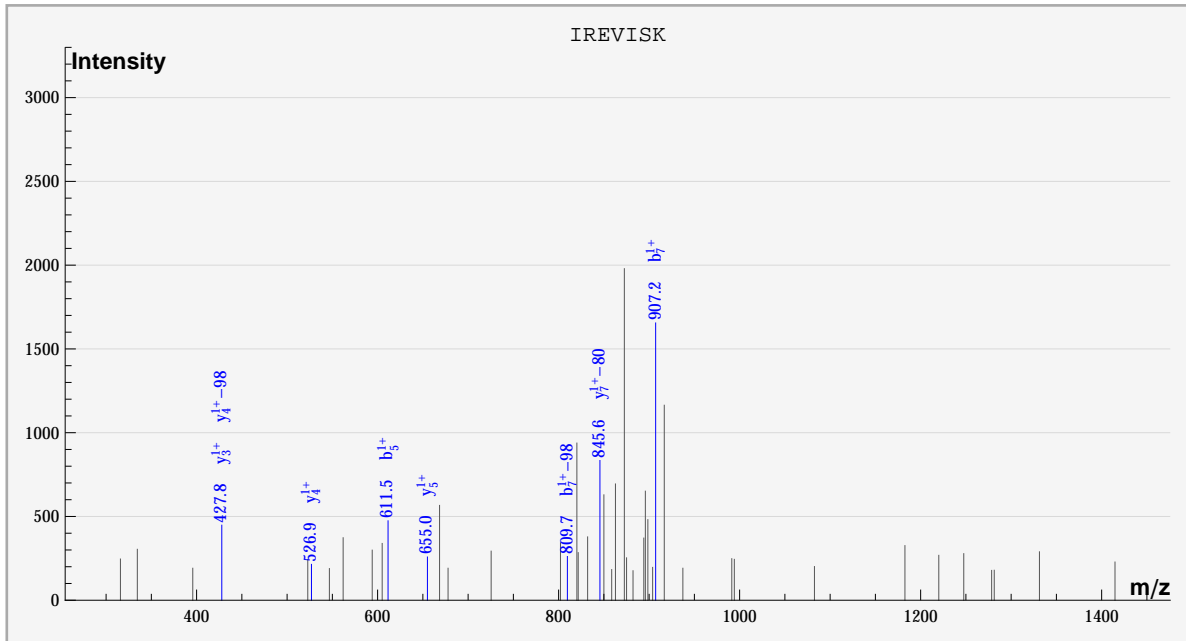

|   | # | b | b* | # | y | y* | P | P* |
|---|---|---|----|---|---|----|---|----|
| I | 1 |   |    |   |   |    |   | ✓  |
| R | 2 |   |    | 6 |   |    |   |    |
| E | 3 |   |    | 5 | ✓ |    |   |    |
| V | 4 |   |    | 4 | ✓ | ✓  |   |    |
| I | 5 | ✓ |    | 3 | ✓ |    |   |    |
| S | 6 |   |    | 2 |   |    |   |    |
| K | 7 | ✓ | ✓  | 1 |   |    |   |    |

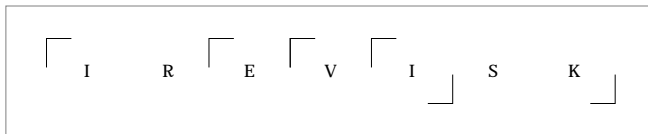

dbValid true LMINLSR PHOS(1) 1. 928. -1.54711 5.44044 100. ? 2226.

S\_Acido\_new%gi|68567696|gb|AAY80625.1| LMINLSR%:::PHOS::%sample\_2%compd\_918

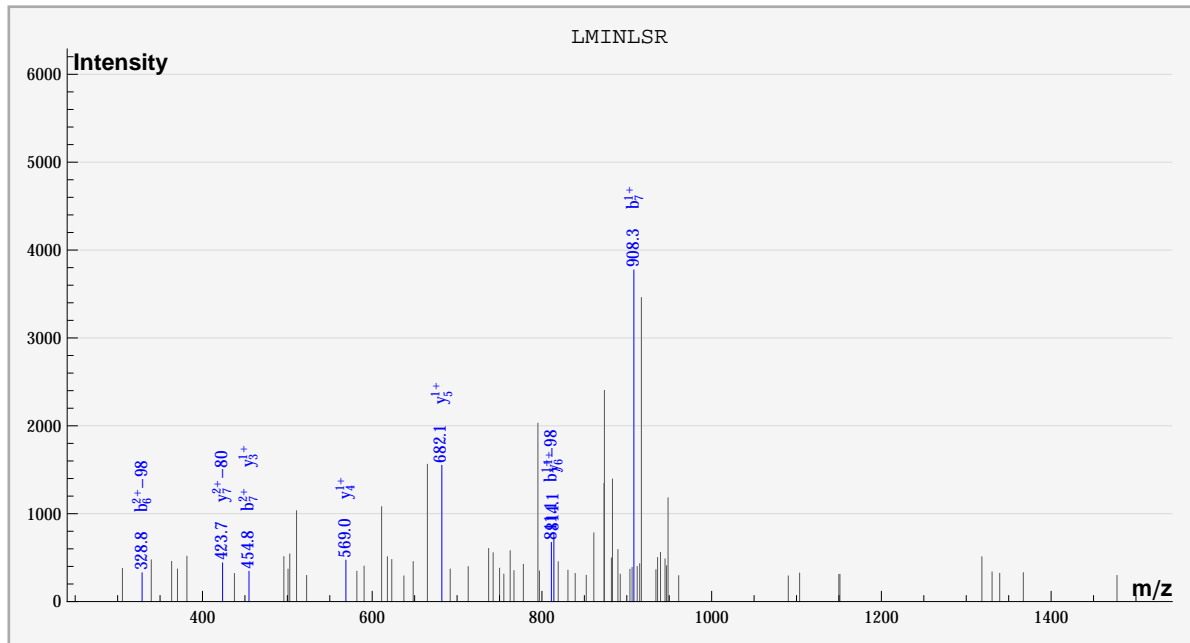

|   | # | b | b* | # | y | y* | P | P* |
|---|---|---|----|---|---|----|---|----|
| L | 1 |   |    |   |   |    |   | ✓  |
| M | 2 |   |    | 6 | ✓ |    |   |    |
| I | 3 |   |    | 5 | ✓ |    |   |    |
| N | 4 |   |    | 4 | ✓ |    |   |    |
| L | 5 |   |    | 3 | ✓ |    |   |    |
| S | 6 | ✓ | ✓  | 2 |   |    |   |    |
| R | 7 | ✓ | ✓  | 1 |   |    |   |    |

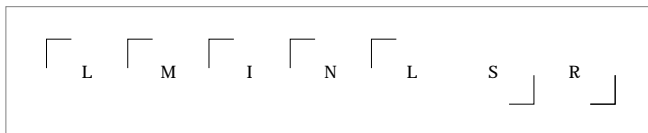

dbValid true QTEENTK PHOS(1) 1. 930. -0.638835 5.30536 100. ? 2268.

S\_Acido\_new%gi|68568484|gb|AAY81413.1| QTEENTK%:::PHOS:::sample\_1%compd\_871

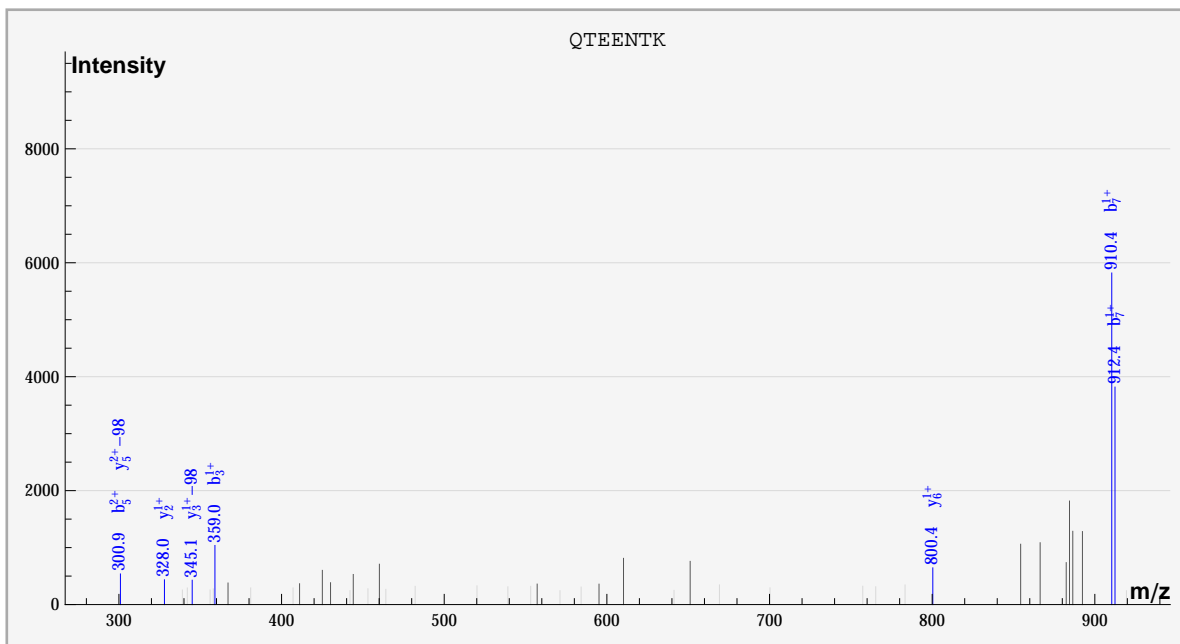

|   | # | b | b* | # | y | y* | P | P* |
|---|---|---|----|---|---|----|---|----|
| Q | 1 |   |    |   |   |    |   |    |
| T | 2 |   |    | 6 | ✓ |    |   |    |
| E | 3 | ✓ |    | 5 |   | ✓  |   |    |
| E | 4 |   |    | 4 |   |    |   |    |
| N | 5 | ✓ |    | 3 |   | ✓  |   |    |
| T | 6 |   |    | 2 | ✓ |    |   |    |
| K | 7 | ✓ |    | 1 |   |    |   |    |

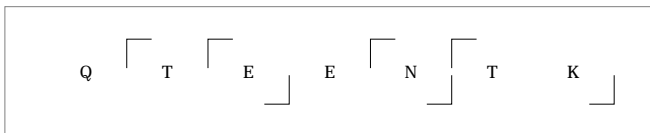

dbValid true MITLYK PHOS(2) 1. 930. -1.63497 5.3907 100. ? 3654.  
 S\_Acido\_new%gi|68568410|gb|AAY81339.1| MITLYK%:::PHOS::PHOS::%sample\_1%compd\_2026

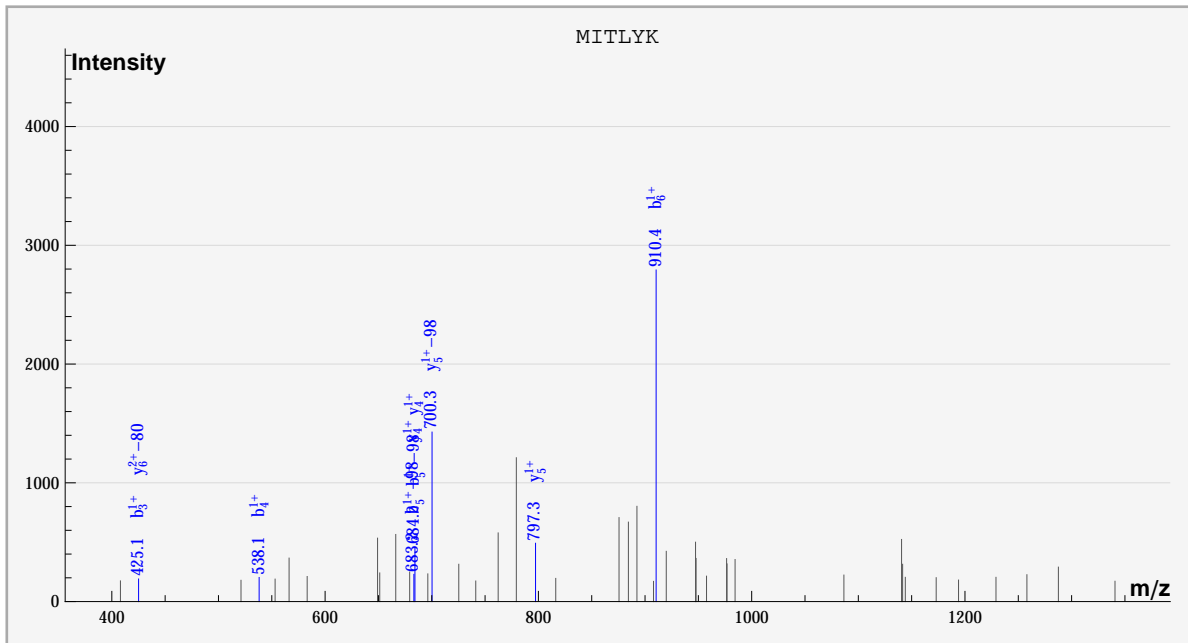

|   | # | b | b* | # | y | y* | P | P* |
|---|---|---|----|---|---|----|---|----|
| M | 1 |   |    |   |   |    |   | ✓  |
| I | 2 |   |    | 5 | ✓ | ✓  |   |    |
| T | 3 | ✓ |    | 4 | ✓ |    |   |    |
| L | 4 | ✓ |    | 3 |   |    |   |    |
| Y | 5 |   | ✓  | 2 |   |    |   |    |
| K | 6 | ✓ |    | 1 |   |    |   |    |

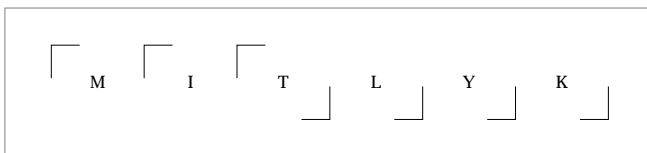

dbValid true YIDIMYNISSYR PHOS(4) 2. 931. -1.69598 5.0766 100. ? 2274.

S\_Acido\_new%gi|68567406|gb|AAV80335.1| YIDIMYNISSYR%:PHOS:::PHOS:PHOS:PHOS::%sample\_0%cmpd\_954

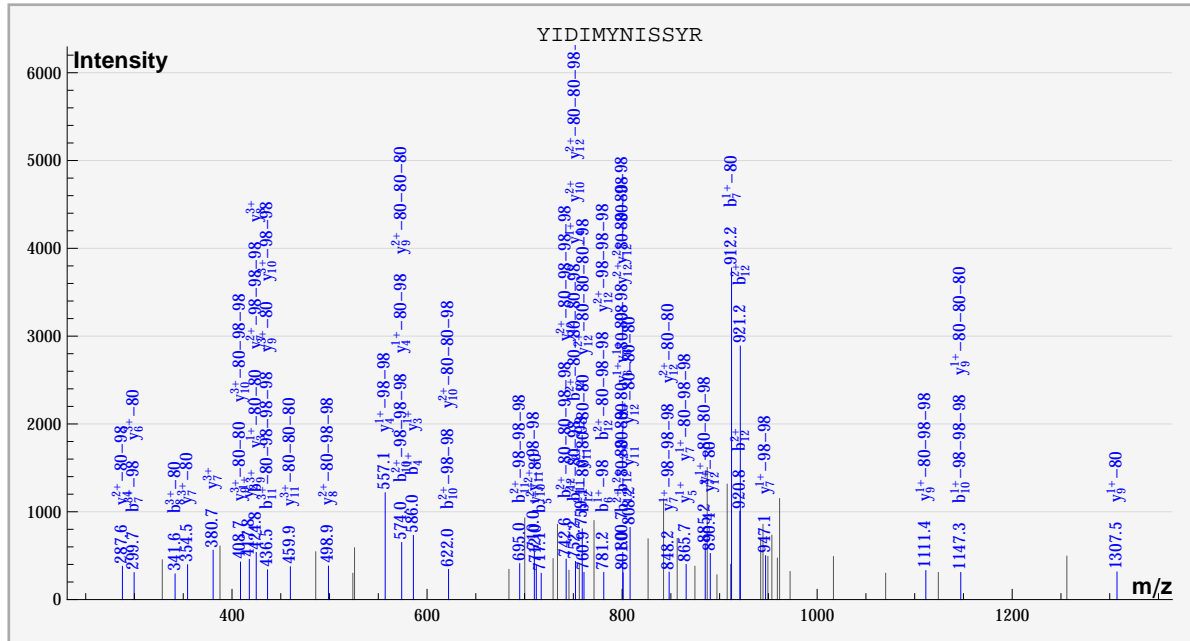

|   | #  | b | b* | #  | y | y* | P | P* |
|---|----|---|----|----|---|----|---|----|
| Y | 1  |   |    |    |   |    |   | ✓  |
| I | 2  |   |    | 11 | ✓ | ✓  |   |    |
| D | 3  |   |    | 10 | ✓ | ✓  |   |    |
| I | 4  | ✓ |    | 9  |   | ✓  |   |    |
| M | 5  | ✓ |    | 8  | ✓ | ✓  |   |    |
| Y | 6  |   | ✓  | 7  | ✓ | ✓  |   |    |
| N | 7  |   | ✓  | 6  |   | ✓  |   |    |
| I | 8  |   | ✓  | 5  | ✓ |    |   |    |
| S | 9  | ✓ |    | 4  | ✓ | ✓  |   |    |
| S | 10 |   | ✓  | 3  | ✓ | ✓  |   |    |
| Y | 11 | ✓ |    | 2  | ✓ |    |   |    |
| R | 12 | ✓ | ✓  | 1  |   |    |   |    |

Y I D I M Y N I S S Y R

dbValid true WQKLNIGIDENYYR PHOS(2) 2. 931. -1.11834 5.57715 100. ? 3240.  
 S\_Acido\_new%gi|68566755|gb|AA79684.1| WQKLNIGIDENYYR%:.....PHOS:PHOS::%sample\_2%compd\_1845

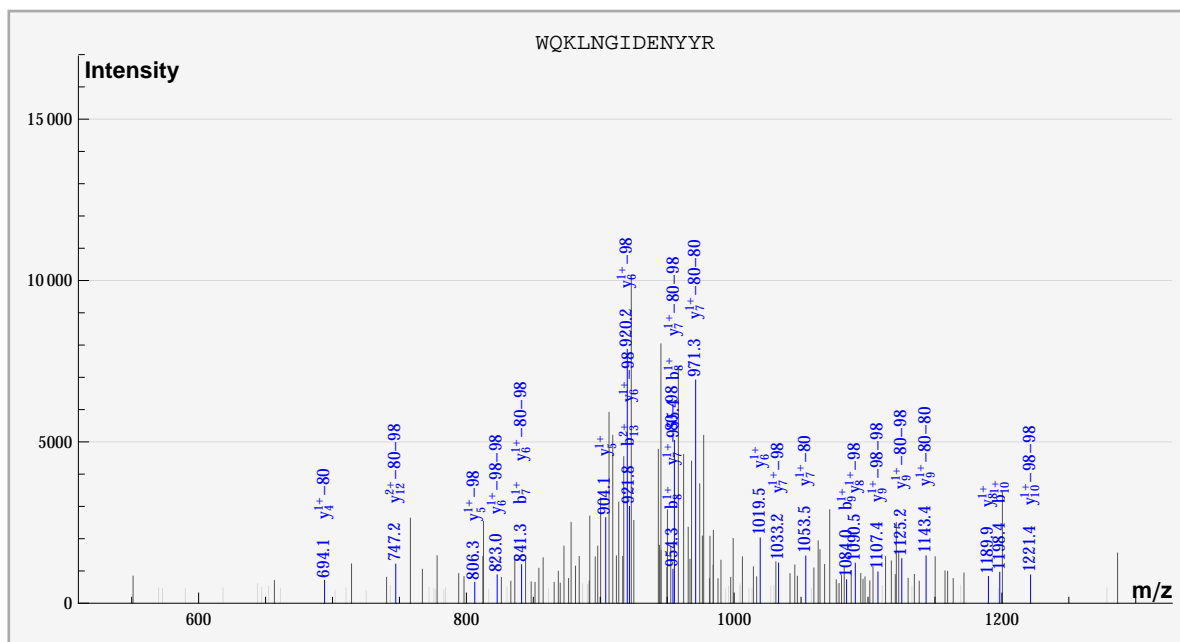

|   | #  | b | b* | #  | y | y* | P | P* |
|---|----|---|----|----|---|----|---|----|
| W | 1  |   |    |    |   |    |   |    |
| Q | 2  |   |    | 12 |   | ✓  |   |    |
| K | 3  |   |    | 11 |   |    |   |    |
| L | 4  |   |    | 10 |   | ✓  |   |    |
| N | 5  |   |    | 9  |   | ✓  |   |    |
| G | 6  |   |    | 8  | ✓ | ✓  |   |    |
| I | 7  | ✓ |    | 7  |   | ✓  |   |    |
| D | 8  | ✓ |    | 6  | ✓ | ✓  |   |    |
| E | 9  | ✓ |    | 5  | ✓ | ✓  |   |    |
| N | 10 | ✓ |    | 4  |   | ✓  |   |    |
| Y | 11 |   |    | 3  |   |    |   |    |
| Y | 12 |   |    | 2  |   |    |   |    |
| R | 13 | ✓ |    | 1  |   |    |   |    |

W [ Q [ K [ L [ N [ G [ I [ D [ E [ N [ Y [ Y [ R [ ]

dbValid true KCVPLVIGLTERR Cys\_CAM(1),PHOS(2) 2. 933. -0.548808 5.05906 100. ? 2592.  
 S\_Acido\_new%gi|68566534|gb|AA79463.1| KCVPLVIGLTERR%::Cys\_CAM:PHOS:::PHOS:::%sample\_0%cmpd\_1246

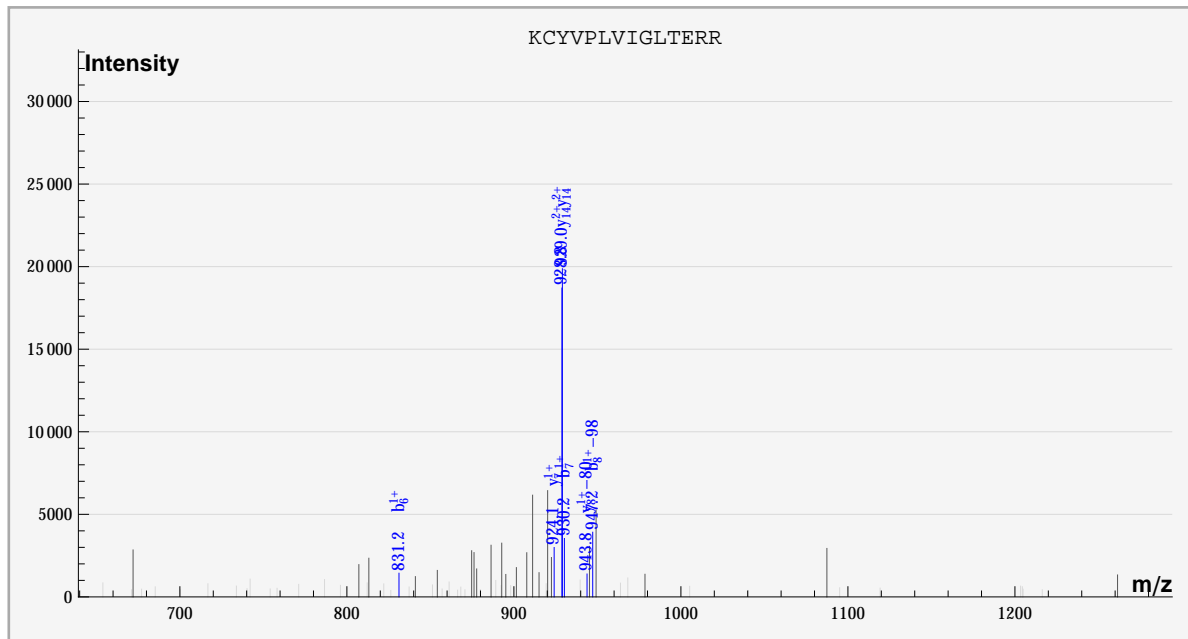

|   | #  | b | b* | #  | y | y* | P | P* |
|---|----|---|----|----|---|----|---|----|
| K | 1  |   |    |    |   |    |   | ✓  |
| C | 2  |   |    | 13 |   |    |   |    |
| Y | 3  |   |    | 12 |   |    |   |    |
| V | 4  |   |    | 11 |   |    |   |    |
| P | 5  |   |    | 10 |   |    |   |    |
| L | 6  | ✓ |    | 9  |   |    |   |    |
| V | 7  | ✓ |    | 8  |   | ✓  |   |    |
| I | 8  |   | ✓  | 7  | ✓ |    |   |    |
| G | 9  |   |    | 6  |   |    |   |    |
| L | 10 |   |    | 5  |   |    |   |    |
| T | 11 |   |    | 4  |   |    |   |    |
| E | 12 |   |    | 3  |   |    |   |    |
| R | 13 |   |    | 2  |   |    |   |    |
| R | 14 |   |    | 1  |   |    |   |    |

[K C Y V P L][V][I]G L T E R R

dbValid true DVITYLK PHOS(1) 1. 933. -1.54641 5.16634 100. ? 3036.  
 S\_Acido\_new%gi|68568663|gb|AAY81592.1| DVITYLK%:::PHOS:::%sample\_1%compd\_1510

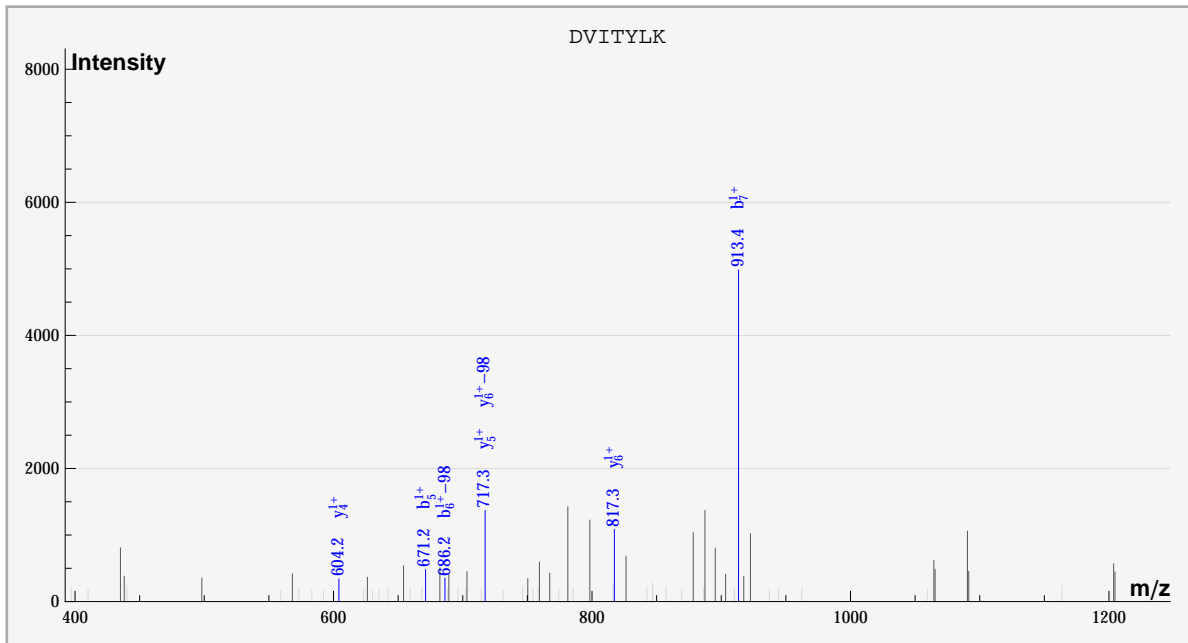

|   | # | b | b* | # | y | y* | P | P* |
|---|---|---|----|---|---|----|---|----|
| D | 1 |   |    |   |   |    |   |    |
| V | 2 |   |    | 6 | ✓ | ✓  |   |    |
| I | 3 |   |    | 5 | ✓ |    |   |    |
| T | 4 |   |    | 4 | ✓ |    |   |    |
| Y | 5 | ✓ |    | 3 |   |    |   |    |
| L | 6 |   | ✓  | 2 |   |    |   |    |
| K | 7 | ✓ |    | 1 |   |    |   |    |

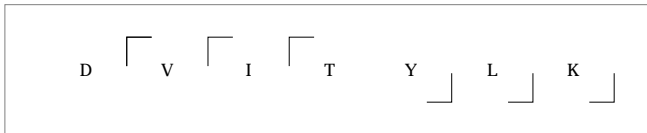



dbValid true DVITYLK PHOS(1) 1. 933. -1.54641 5.26066 100. ? 3048.  
 S\_Acido\_new%gi|68568663|gb|AAY81592.1| DVITYLK%:::PHOS:::%sample\_1%compd\_1520

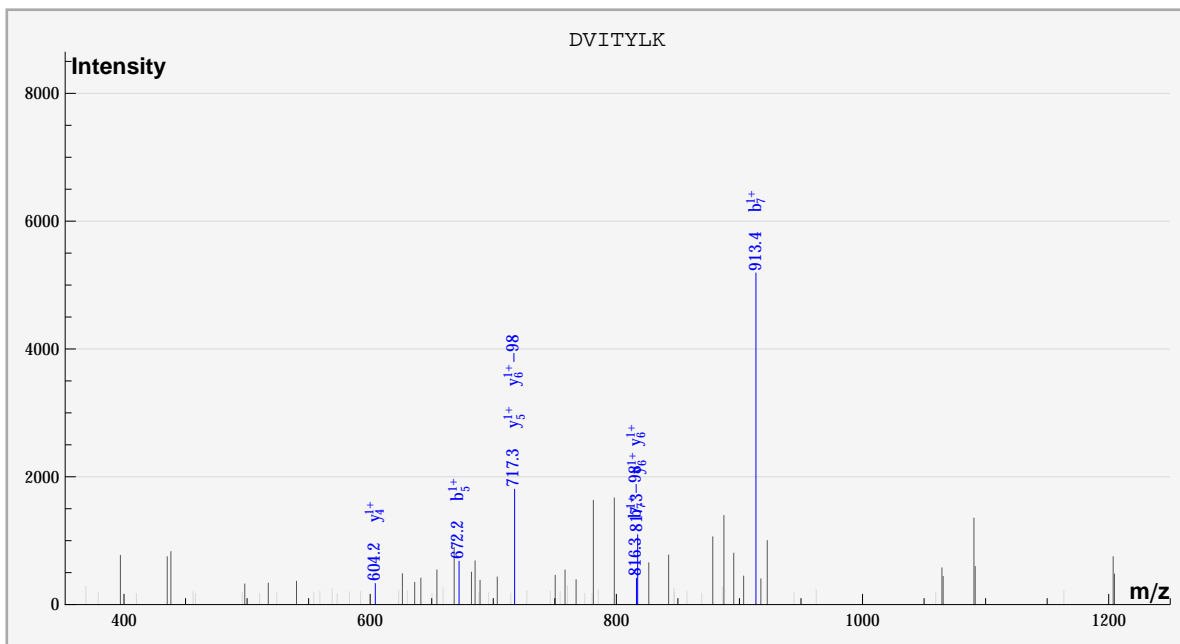

|   | # | b | b* | # | y | y* | P | P* |
|---|---|---|----|---|---|----|---|----|
| D | 1 |   |    |   |   |    |   |    |
| V | 2 |   |    | 6 | ✓ | ✓  |   |    |
| I | 3 |   |    | 5 | ✓ |    |   |    |
| T | 4 |   |    | 4 | ✓ |    |   |    |
| Y | 5 | ✓ |    | 3 |   |    |   |    |
| L | 6 |   |    | 2 |   |    |   |    |
| K | 7 | ✓ | ✓  | 1 |   |    |   |    |

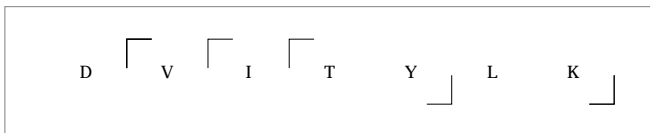

dbValid true DVITYLK PHOS(1) 1. 933. -1.54641 5.86855 100. ? 3108.  
 S\_Acido\_new%gi|68568663|gb|AAY81592.1| DVITYLK%:::PHOS:::%sample\_1%compd\_1572

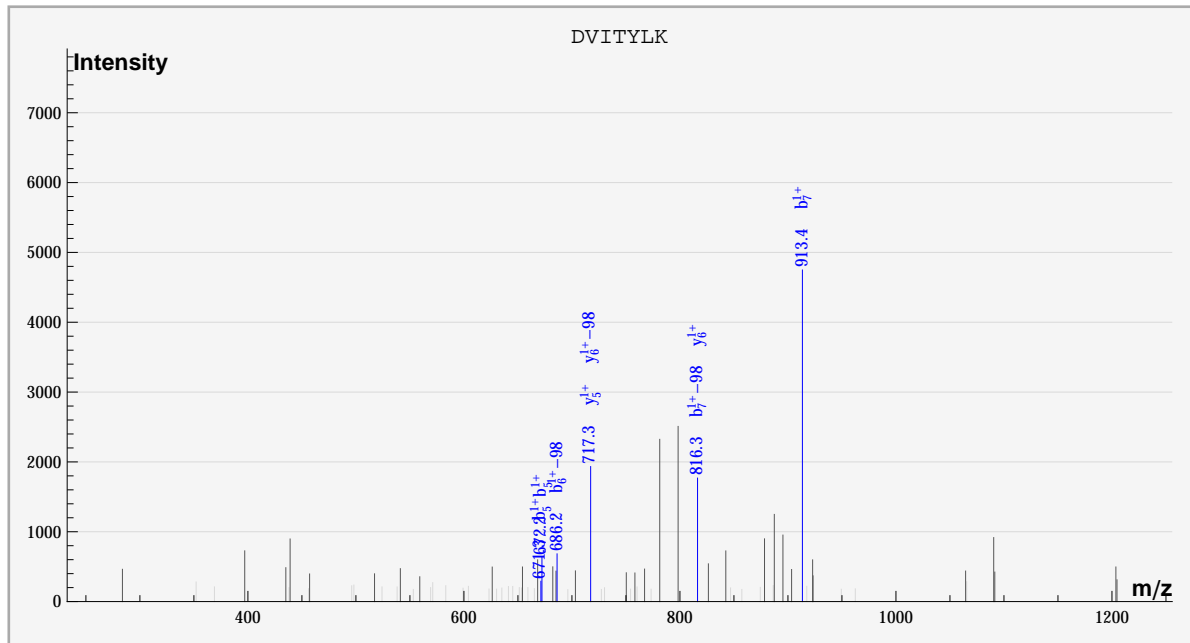

|   | # | b | b* | # | y | y* | P | P* |
|---|---|---|----|---|---|----|---|----|
| D | 1 |   |    |   |   |    |   |    |
| V | 2 |   |    | 6 | ✓ | ✓  |   |    |
| I | 3 |   |    | 5 | ✓ |    |   |    |
| T | 4 |   |    | 4 |   |    |   |    |
| Y | 5 | ✓ |    | 3 |   |    |   |    |
| L | 6 |   | ✓  | 2 |   |    |   |    |
| K | 7 | ✓ | ✓  | 1 |   |    |   |    |

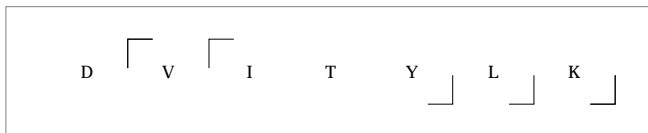

dbValid true GLLSLVPR PHOS(1) 1. 933. 1.51211 5.4608 100. ? 3120.  
 S\_Acido\_new%gi|68567761|gb|AA80690.1| GLLSLVPR%:::PHOS:::%sample\_0%compd\_1745

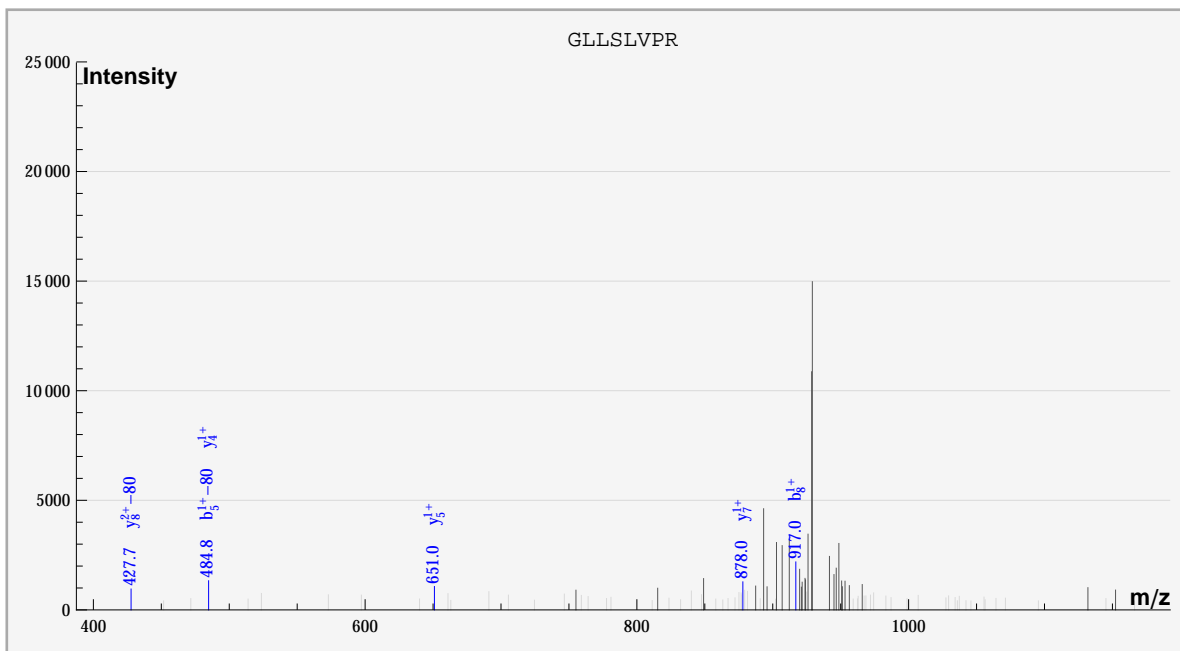

|   | # | b | b* | # | y | y* | P | P* |
|---|---|---|----|---|---|----|---|----|
| G | 1 |   |    |   |   |    |   | ✓  |
| L | 2 |   |    | 7 | ✓ |    |   |    |
| L | 3 |   |    | 6 |   |    |   |    |
| S | 4 |   |    | 5 | ✓ |    |   |    |
| L | 5 | ✓ |    | 4 | ✓ |    |   |    |
| V | 6 |   |    | 3 |   |    |   |    |
| P | 7 |   |    | 2 |   |    |   |    |
| R | 8 | ✓ |    | 1 |   |    |   |    |

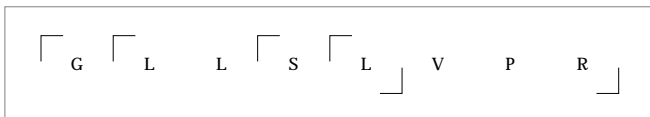

dbValid true DVITYLK PHOS(1) 1. 933. -1.54641 5.2415 100. ? 3324.

S\_Acido\_new%gi|68568663|gb|AAY81592.1| DVITYLK%::::PHOS::::%sample\_1%compd\_1755

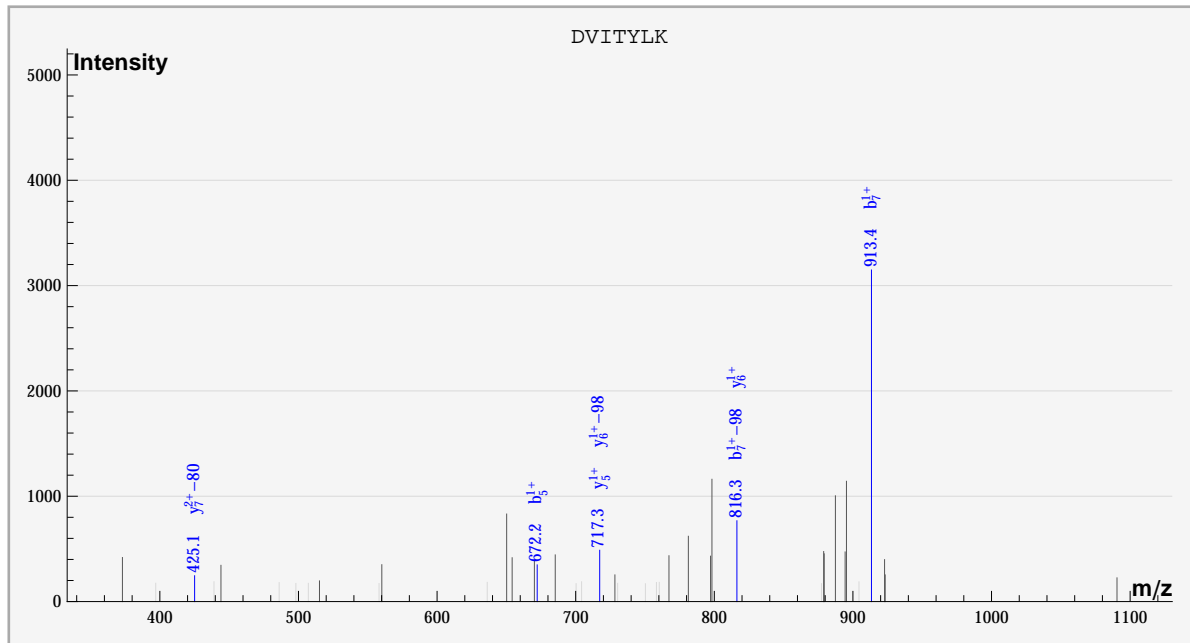

|   | # | b | b* | # | y | y* | P | P* |
|---|---|---|----|---|---|----|---|----|
| D | 1 |   |    |   |   |    |   | ✓  |
| V | 2 |   |    | 6 | ✓ | ✓  |   |    |
| I | 3 |   |    | 5 | ✓ |    |   |    |
| T | 4 |   |    | 4 |   |    |   |    |
| Y | 5 | ✓ |    | 3 |   |    |   |    |
| L | 6 |   |    | 2 |   |    |   |    |
| K | 7 | ✓ | ✓  | 1 |   |    |   |    |

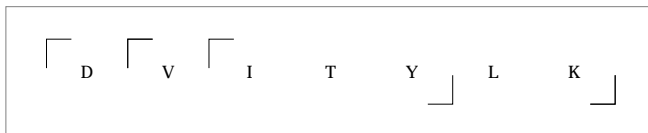

dbValid true MYWVKK PHOS(1) 1. 935. -0.574385 5.16614 100. ? 3288.  
 S\_Acido\_new%gi|68567012|gb|AA79941.1| MYWVKK%::PHOS::::%sample\_1%compd\_1726

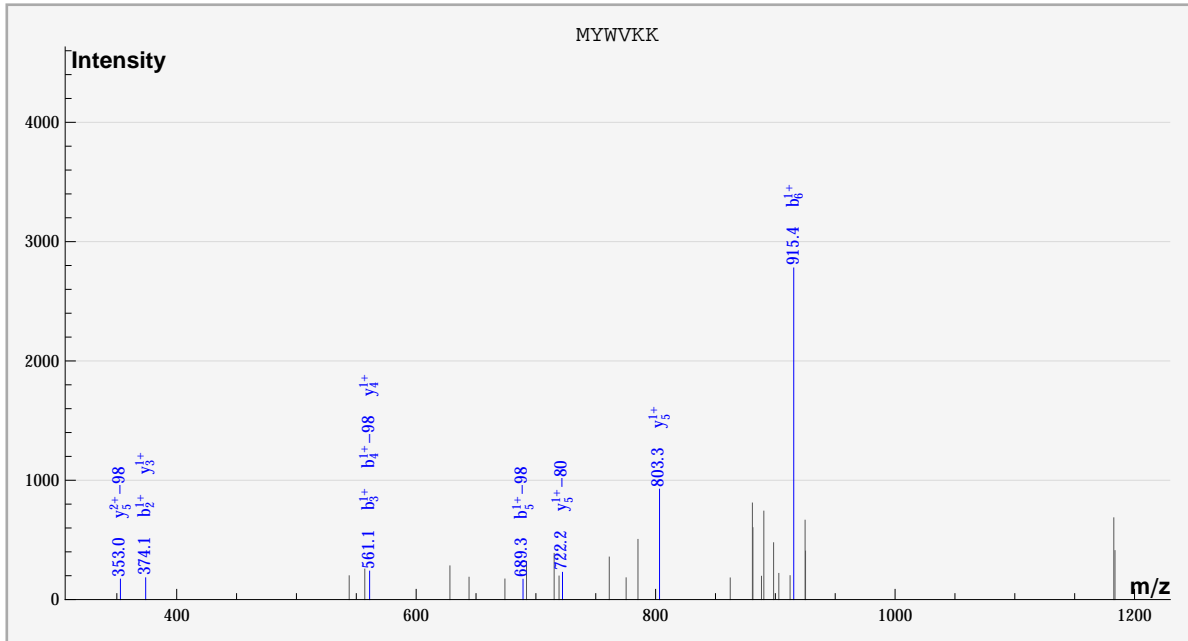

|   | # | b | b* | # | y | y* | P | P* |
|---|---|---|----|---|---|----|---|----|
| M | 1 |   |    |   |   |    |   |    |
| Y | 2 | ✓ |    | 5 | ✓ | ✓  |   |    |
| W | 3 | ✓ |    | 4 | ✓ |    |   |    |
| V | 4 |   | ✓  | 3 | ✓ |    |   |    |
| K | 5 |   | ✓  | 2 |   |    |   |    |
| K | 6 | ✓ |    | 1 |   |    |   |    |

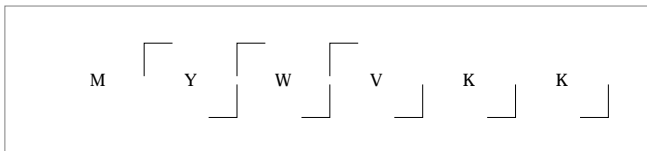

dbValid true YDIKRFAFYLDGER PHOS(1) 2. 935. 1.93763 5.05506 100. ? 4218.  
 S\_Acido\_new%gi|68567831|gb|AA80760.1| YDIKRFAFYLDGER%:PHOS:::sample\_0%cmpd\_2747

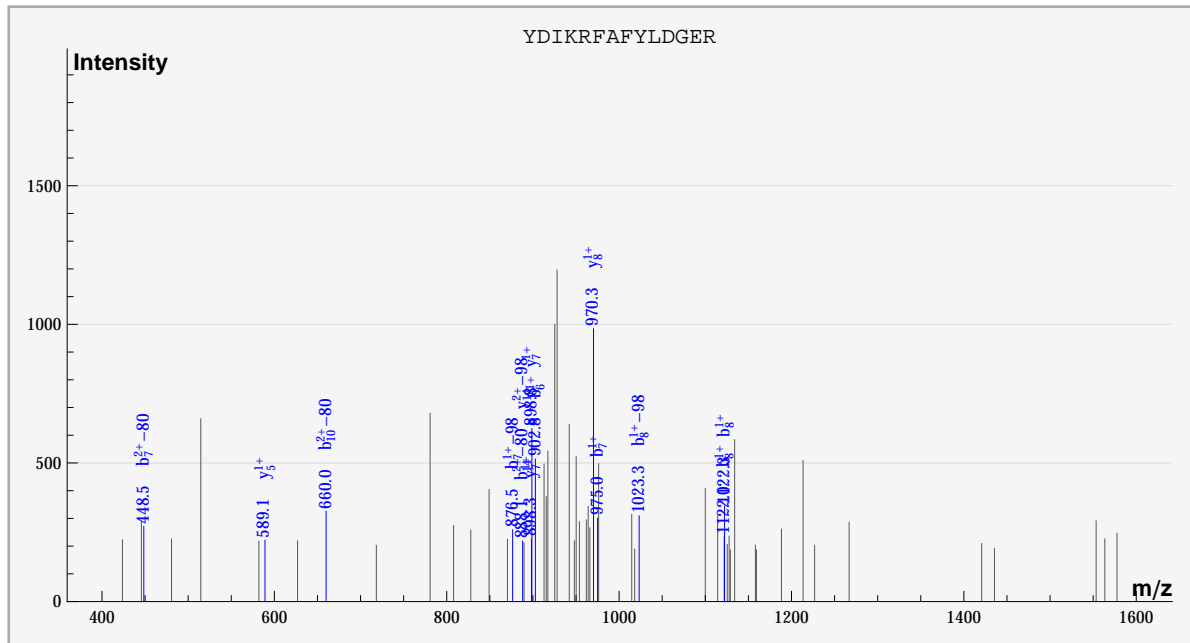

|   | #  | b | b* | #  | y | y* | P | P* |
|---|----|---|----|----|---|----|---|----|
| Y | 1  |   |    |    |   |    |   | ✓  |
| D | 2  |   |    | 13 |   |    |   |    |
| I | 3  |   |    | 12 |   |    |   |    |
| K | 4  |   |    | 11 |   |    |   |    |
| R | 5  |   |    | 10 |   |    |   |    |
| F | 6  | ✓ |    | 9  |   |    |   |    |
| A | 7  | ✓ | ✓  | 8  | ✓ |    |   |    |
| F | 8  | ✓ | ✓  | 7  | ✓ |    |   |    |
| Y | 9  |   |    | 6  |   |    |   |    |
| L | 10 |   | ✓  | 5  | ✓ |    |   |    |
| D | 11 |   |    | 4  |   |    |   |    |
| G | 12 |   |    | 3  |   |    |   |    |
| E | 13 |   |    | 2  |   |    |   |    |
| R | 14 |   | ✓  | 1  |   |    |   |    |

「 Y D I K R F 」 「 A 」 「 F 」 Y 「 L 」 D G E R 」

dbValid true SLTEFT PHOS(3) 1. 938. -0.760795 5.14542 100. ? 1878.

S\_Acido\_new%gi|68566616|gb|AAY79545.1| SLTEFT%:PHOS::PHOS::PHOS:%sample\_0%compd\_595

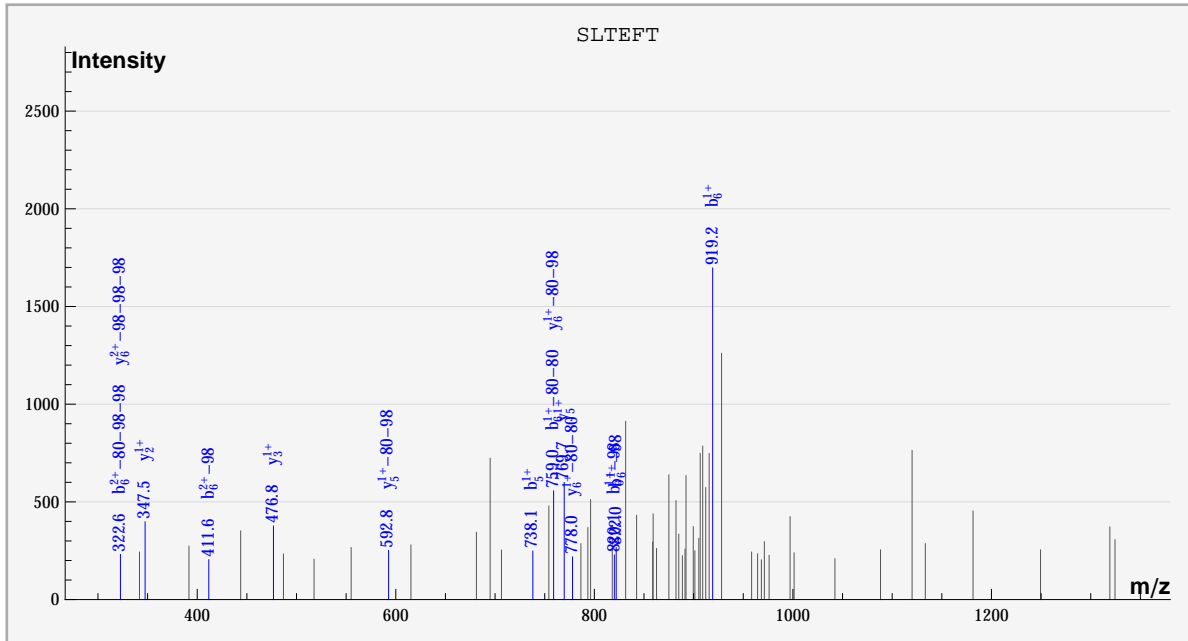

|   | # | b | b* | # | y | y* | P | P* |
|---|---|---|----|---|---|----|---|----|
| S | 1 |   |    |   |   |    |   | ✓  |
| L | 2 |   |    | 5 | ✓ | ✓  |   |    |
| T | 3 |   |    | 4 |   |    |   |    |
| E | 4 |   |    | 3 | ✓ |    |   |    |
| F | 5 | ✓ |    | 2 | ✓ |    |   |    |
| T | 6 | ✓ | ✓  | 1 |   |    |   |    |

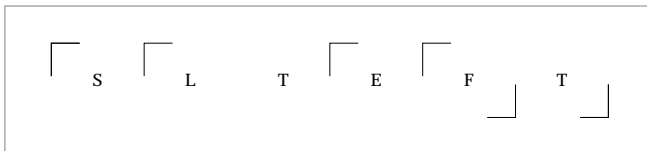

dbValid true YEDERGLLMELFKR PHOS(1) 2. 939. 0.944597 5.21697 100. ? 1812.  
 S\_Acido\_new%gi|68568083|gb|AAy81012.1| YEDERGLLMELFKR%:PHOS:::sample\_1%compd\_496

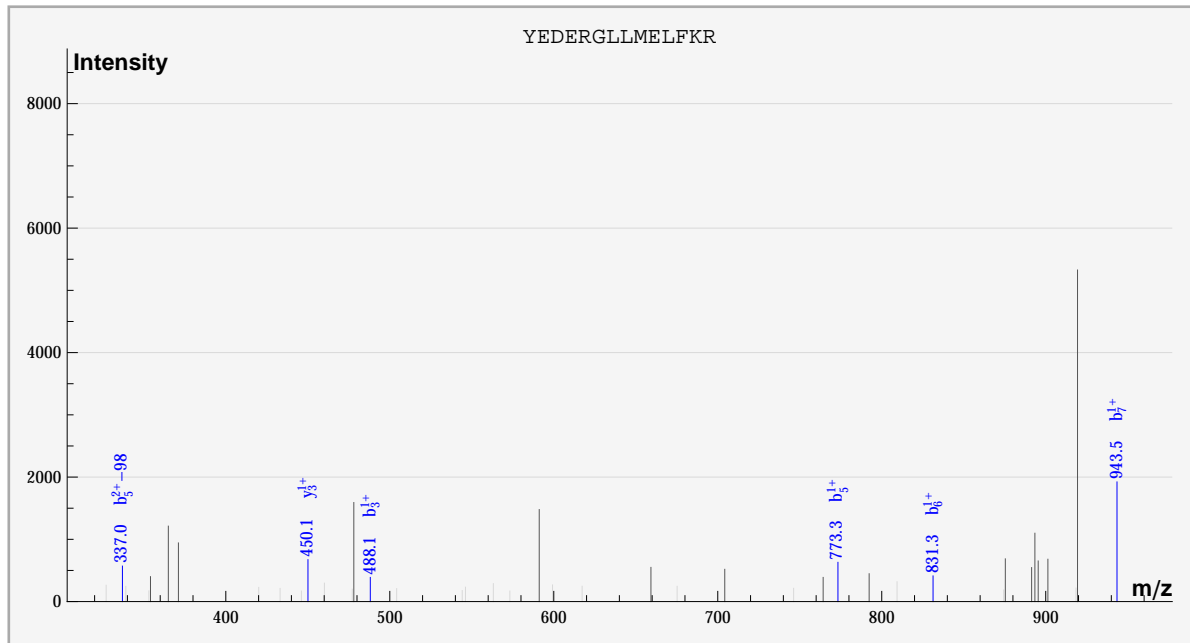

|   | #  | b | b* | #  | y | y* | P | P* |
|---|----|---|----|----|---|----|---|----|
| Y | 1  |   |    |    |   |    |   |    |
| E | 2  |   |    | 13 |   |    |   |    |
| D | 3  | ✓ |    | 12 |   |    |   |    |
| E | 4  |   |    | 11 |   |    |   |    |
| R | 5  | ✓ | ✓  | 10 |   |    |   |    |
| G | 6  | ✓ |    | 9  |   |    |   |    |
| L | 7  | ✓ |    | 8  |   |    |   |    |
| L | 8  |   |    | 7  |   |    |   |    |
| M | 9  |   |    | 6  |   |    |   |    |
| E | 10 |   |    | 5  |   |    |   |    |
| L | 11 |   |    | 4  |   |    |   |    |
| F | 12 |   |    | 3  | ✓ |    |   |    |
| K | 13 |   |    | 2  |   |    |   |    |
| R | 14 |   |    | 1  |   |    |   |    |

Y E D E R G L L M E L F K R



dbValid true YEDERGLLMELFKR PHOS(1) 2. 939. 0.944597 5.44779 100. ? 1824.  
 S\_Acido\_new%gi|68568083|gb|AA81012.1| YEDERGLLMELFKR%PHOS:::::::::::::sample\_1%compd\_506

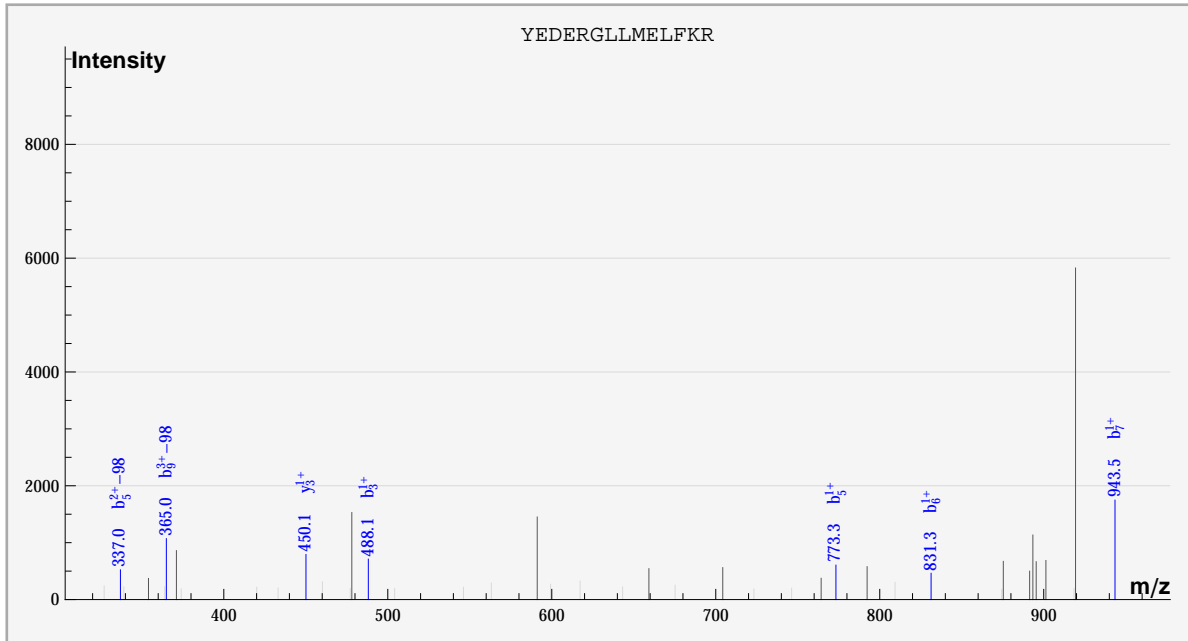

|   | #  | b | b* | #  | y | y* | P | P* |
|---|----|---|----|----|---|----|---|----|
| Y | 1  |   |    |    |   |    |   |    |
| E | 2  |   |    | 13 |   |    |   |    |
| D | 3  | ✓ |    | 12 |   |    |   |    |
| E | 4  |   |    | 11 |   |    |   |    |
| R | 5  | ✓ | ✓  | 10 |   |    |   |    |
| G | 6  | ✓ |    | 9  |   |    |   |    |
| L | 7  | ✓ |    | 8  |   |    |   |    |
| L | 8  |   |    | 7  |   |    |   |    |
| M | 9  |   | ✓  | 6  |   |    |   |    |
| E | 10 |   |    | 5  |   |    |   |    |
| L | 11 |   |    | 4  |   |    |   |    |
| F | 12 |   |    | 3  | ✓ |    |   |    |
| K | 13 |   |    | 2  |   |    |   |    |
| R | 14 |   |    | 1  |   |    |   |    |

Y E D E R G L L M E L F K R

dbValid true YEDERGLLMELFKR PHOS(1) 2. 939. 0.944597 5.52356 100. ? 1836.  
 S\_Acido\_new%gi|68568083|gb|AAy81012.1| YEDERGLLMELFKR%:PHOS:::sample\_1%compd\_516

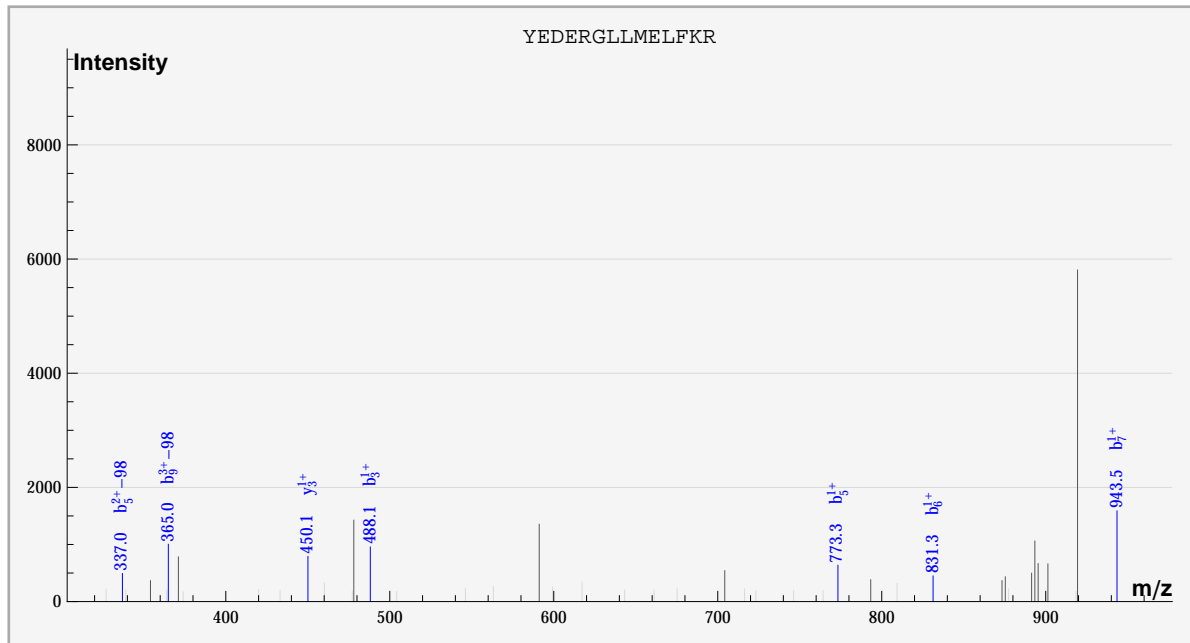

|   | #  | b | b* | #  | y | y* | P | P* |
|---|----|---|----|----|---|----|---|----|
| Y | 1  |   |    |    |   |    |   |    |
| E | 2  |   |    | 13 |   |    |   |    |
| D | 3  | ✓ |    | 12 |   |    |   |    |
| E | 4  |   |    | 11 |   |    |   |    |
| R | 5  | ✓ | ✓  | 10 |   |    |   |    |
| G | 6  | ✓ |    | 9  |   |    |   |    |
| L | 7  | ✓ |    | 8  |   |    |   |    |
| L | 8  |   |    | 7  |   |    |   |    |
| M | 9  |   | ✓  | 6  |   |    |   |    |
| E | 10 |   |    | 5  |   |    |   |    |
| L | 11 |   |    | 4  |   |    |   |    |
| F | 12 |   |    | 3  | ✓ |    |   |    |
| K | 13 |   |    | 2  |   |    |   |    |
| R | 14 |   |    | 1  |   |    |   |    |

Y E D E R G L L M E L F K R

dbValid true YEDERGLLMELFKR PHOS(1) 2. 939. 0.944597 5.07775 100. ? 1848.  
 S\_Acido\_new%gi|68568083|gb|AAY81012.1| YEDERGLLMELFKR%:PHOS:::sample\_1%compd\_526

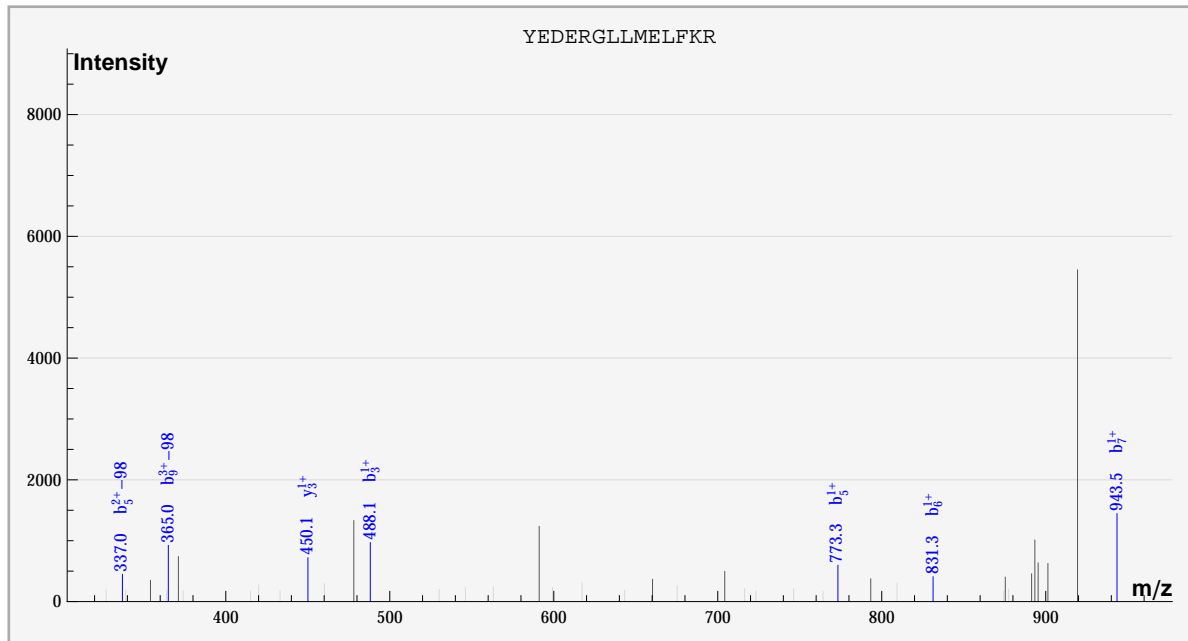

|   | #  | b | b* | #  | y | y* | P | P* |
|---|----|---|----|----|---|----|---|----|
| Y | 1  |   |    |    |   |    |   |    |
| E | 2  |   |    | 13 |   |    |   |    |
| D | 3  | ✓ |    | 12 |   |    |   |    |
| E | 4  |   |    | 11 |   |    |   |    |
| R | 5  | ✓ | ✓  | 10 |   |    |   |    |
| G | 6  | ✓ |    | 9  |   |    |   |    |
| L | 7  | ✓ |    | 8  |   |    |   |    |
| L | 8  |   |    | 7  |   |    |   |    |
| M | 9  |   | ✓  | 6  |   |    |   |    |
| E | 10 |   |    | 5  |   |    |   |    |
| L | 11 |   |    | 4  |   |    |   |    |
| F | 12 |   |    | 3  | ✓ |    |   |    |
| K | 13 |   |    | 2  |   |    |   |    |
| R | 14 |   |    | 1  |   |    |   |    |

Y E D E R G L L M E L F K R

dbValid true YEDERGLLMELFKR PHOS(1) 2. 939. 0.944597 5.16521 100. ? 1872.  
 S\_Acido\_new%gi|68568083|gb|AAY81012.1| YEDERGLLMELFKR%:PHOS:::sample\_1%compd\_546

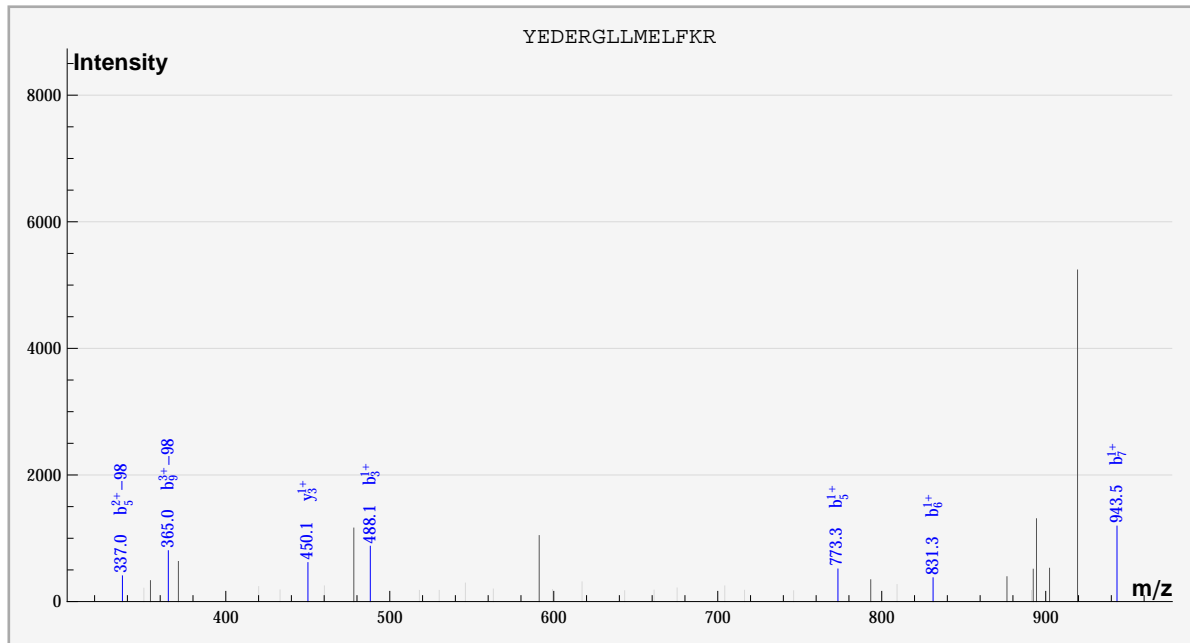

|   | #  | b | b* | #  | y | y* | P | P* |
|---|----|---|----|----|---|----|---|----|
| Y | 1  |   |    |    |   |    |   |    |
| E | 2  |   |    | 13 |   |    |   |    |
| D | 3  | ✓ |    | 12 |   |    |   |    |
| E | 4  |   |    | 11 |   |    |   |    |
| R | 5  | ✓ | ✓  | 10 |   |    |   |    |
| G | 6  | ✓ |    | 9  |   |    |   |    |
| L | 7  | ✓ |    | 8  |   |    |   |    |
| L | 8  |   |    | 7  |   |    |   |    |
| M | 9  |   | ✓  | 6  |   |    |   |    |
| E | 10 |   |    | 5  |   |    |   |    |
| L | 11 |   |    | 4  |   |    |   |    |
| F | 12 |   |    | 3  | ✓ |    |   |    |
| K | 13 |   |    | 2  |   |    |   |    |
| R | 14 |   |    | 1  |   |    |   |    |

Y E D E R G L L M E L F K R

dbValid true HVVVDYK PHOS(1) 1. 939. 0.433525 5.73553 100. ? 4896.  
 S\_Acido\_new%gi|68567239|gb|AAY80168.1| HVVVDYK%:::::PHOS::%sample\_0%compd\_3375

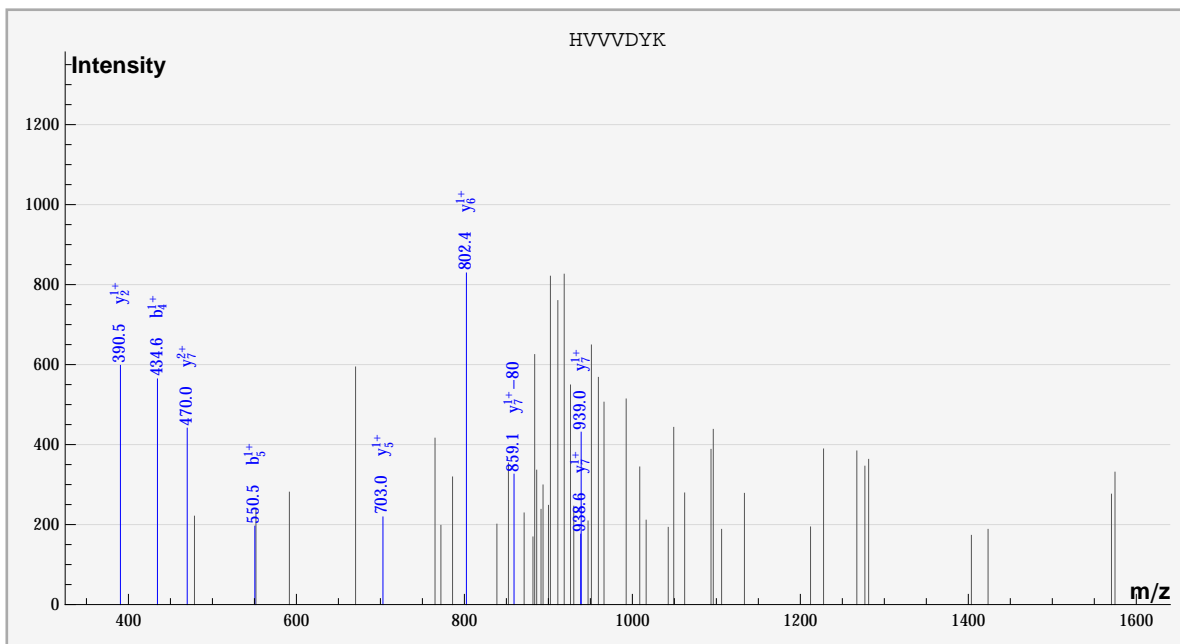

|   | # | b | b* | # | y | y* | P | P* |
|---|---|---|----|---|---|----|---|----|
| H | 1 |   |    |   |   |    | ✓ | ✓  |
| V | 2 |   |    | 6 | ✓ |    |   |    |
| V | 3 |   |    | 5 | ✓ |    |   |    |
| V | 4 | ✓ |    | 4 |   |    |   |    |
| D | 5 | ✓ |    | 3 |   |    |   |    |
| Y | 6 |   |    | 2 | ✓ |    |   |    |
| K | 7 |   |    | 1 |   |    |   |    |

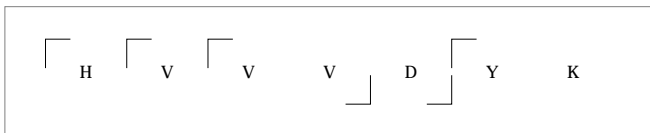

dbValid true SRYYEAIQLRTK PHOS(3) 2. 939. 1.90902 5.09894 100. ? 5202.

S\_Acido\_new%gi|68567392|gb|AA80321.1| SRYYEAIQLRTK%:PHOS::PHOS:::PHOS::%sample\_0%compd\_3652

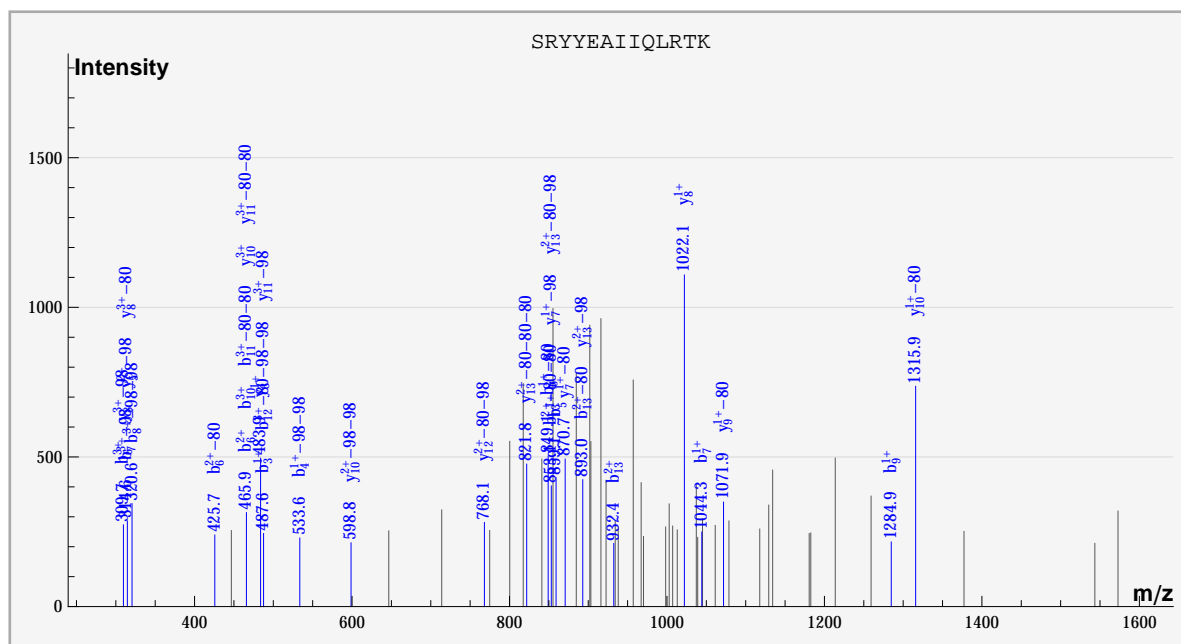

|   | #  | b | b* | #  | y | y* | P | P* |
|---|----|---|----|----|---|----|---|----|
| S | 1  |   |    |    |   |    |   | ✓  |
| R | 2  |   |    | 12 |   | ✓  |   |    |
| Y | 3  | ✓ |    | 11 |   | ✓  |   |    |
| Y | 4  |   | ✓  | 10 | ✓ | ✓  |   |    |
| E | 5  | ✓ |    | 9  |   | ✓  |   |    |
| A | 6  | ✓ | ✓  | 8  | ✓ | ✓  |   |    |
| I | 7  | ✓ | ✓  | 7  |   | ✓  |   |    |
| I | 8  |   | ✓  | 6  |   |    |   |    |
| Q | 9  | ✓ |    | 5  |   | ✓  |   |    |
| L | 10 | ✓ |    | 4  |   |    |   |    |
| R | 11 |   | ✓  | 3  | ✓ |    |   |    |
| T | 12 |   | ✓  | 2  |   |    |   |    |
| K | 13 | ✓ | ✓  | 1  |   |    |   |    |

[ S ] [ R ] [ Y ] [ Y ] [ E ] [ A ] [ I ] [ I ] [ Q ] [ L ] [ R ] [ T ] [ K ]

dbValid true WKITIGGSALPEGLARK PHOS(1) 2. 941. -1.99416 5.26404 100. ? 2628.  
 S\_Acido\_new%gil68567545|gb|AAy80474.1| WKITIGGSALPEGLARK%:::PHOS:::sample\_2%compd\_1360

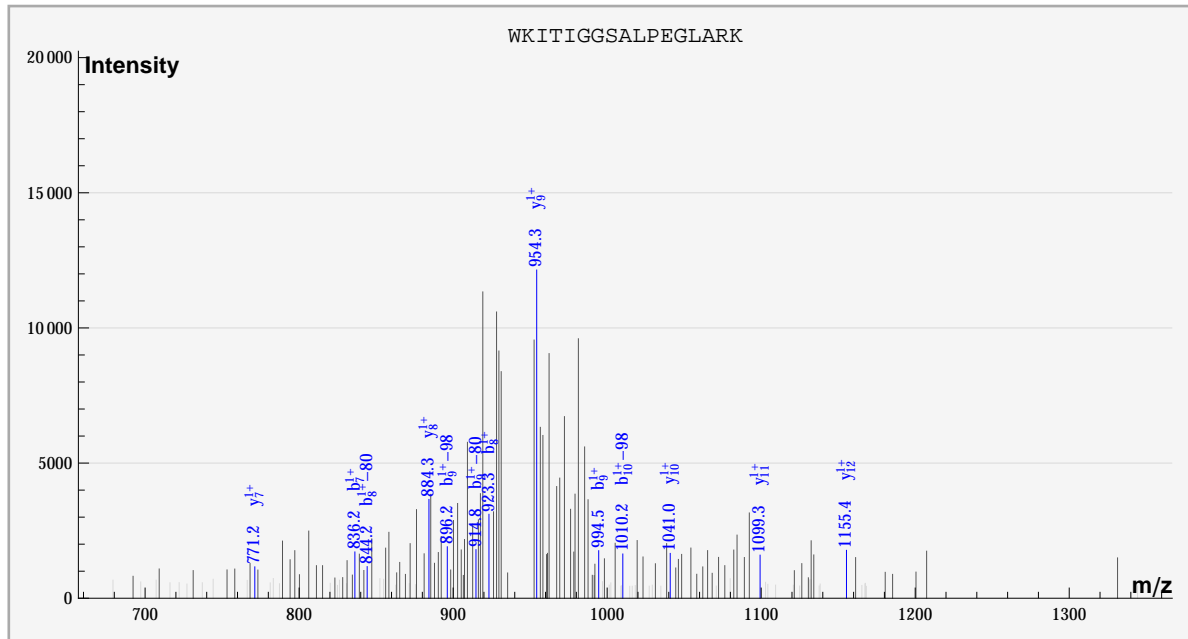

|   | #  | b | b* | #  | y | y* | P | P* |
|---|----|---|----|----|---|----|---|----|
| W | 1  |   |    |    |   |    |   |    |
| K | 2  |   |    | 16 |   |    |   |    |
| I | 3  |   |    | 15 |   |    |   |    |
| T | 4  |   |    | 14 |   |    |   |    |
| I | 5  |   |    | 13 |   |    |   |    |
| G | 6  |   |    | 12 |   | ✓  |   |    |
| G | 7  | ✓ |    | 11 |   | ✓  |   |    |
| S | 8  | ✓ | ✓  | 10 |   | ✓  |   |    |
| A | 9  | ✓ | ✓  | 9  |   | ✓  |   |    |
| L | 10 |   | ✓  | 8  |   | ✓  |   |    |
| P | 11 |   |    | 7  |   | ✓  |   |    |
| E | 12 |   |    | 6  |   |    |   |    |
| G | 13 |   |    | 5  |   |    |   |    |
| L | 14 |   |    | 4  |   |    |   |    |
| A | 15 |   |    | 3  |   |    |   |    |
| R | 16 |   |    | 2  |   |    |   |    |
| K | 17 |   |    | 1  |   |    |   |    |

W K I T I [G [G] S [A] [L] P E G L A R K

dbValid true MTYTGK PHOS(3) 1. 941.88 -1.64765 5.2145 100. ? 4368.  
 S\_Acido\_new%gi|68568628|gb|AA81557.1| MTYTGK::PHOS:PHOS:PHOS::%sample\_1%compd\_3147

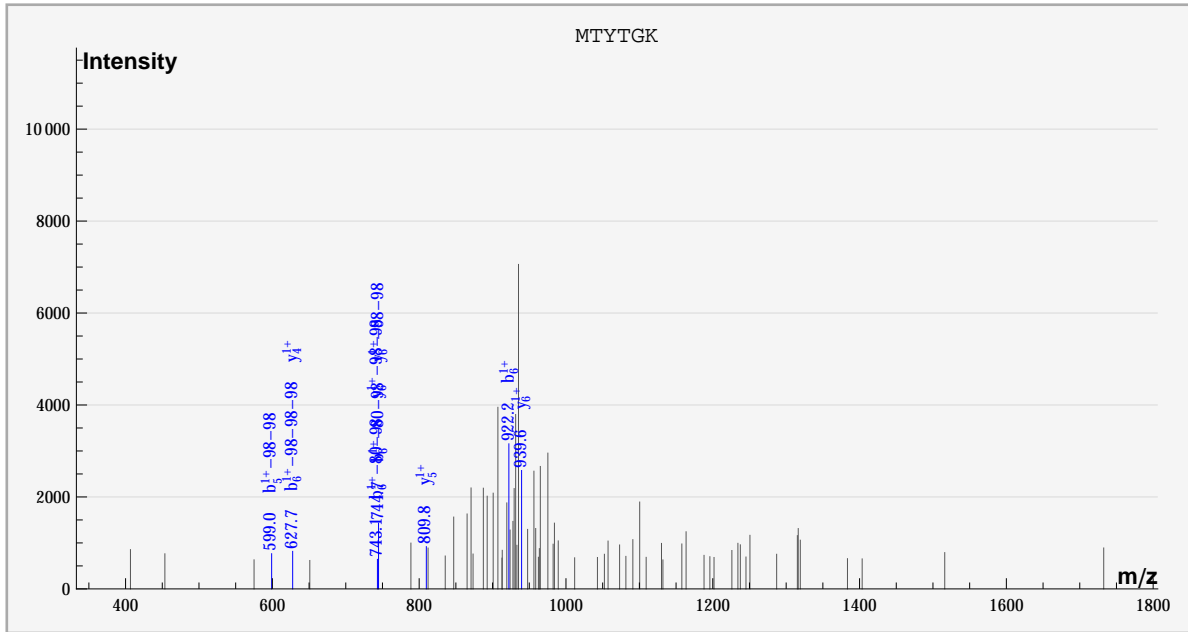

|   | # | b | b* | # | y | y* | P | P* |
|---|---|---|----|---|---|----|---|----|
| M | 1 |   |    |   |   |    | ✓ | ✓  |
| T | 2 |   |    | 5 | ✓ |    |   |    |
| Y | 3 |   |    | 4 | ✓ |    |   |    |
| T | 4 |   |    | 3 |   |    |   |    |
| G | 5 | ✓ | ✓  | 2 |   |    |   |    |
| K | 6 | ✓ | ✓  | 1 |   |    |   |    |

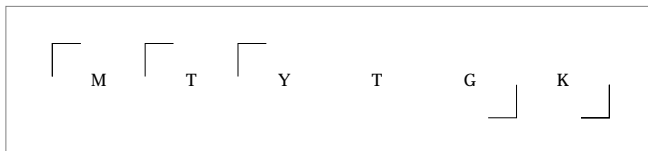



dbValid true DSMIIVGK PHOS(1) 1. 944. -1.56344 5.18761 100. ? 2058.  
 S\_Acido\_new%gi|68566881|gb|AAY79810.1| DSMIIVGK%::PHOS:.....%sample\_2%cmpd\_693

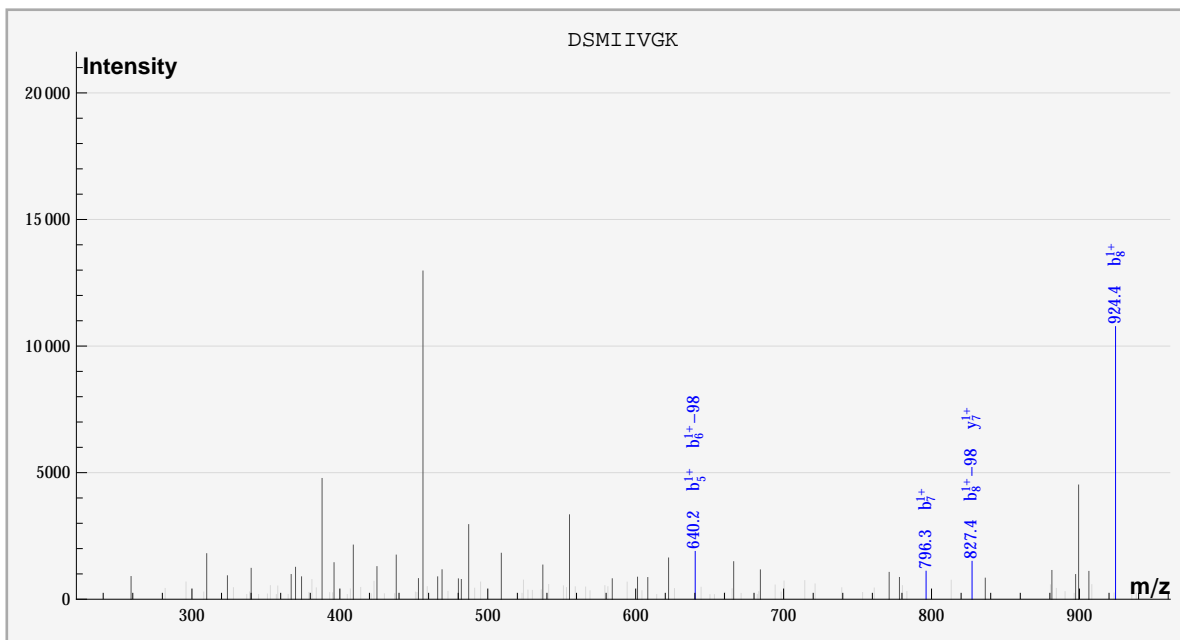

|   | # | b | b* | # | y | y* | P | P* |
|---|---|---|----|---|---|----|---|----|
| D | 1 |   |    |   |   |    |   |    |
| S | 2 |   |    | 7 | ✓ |    |   |    |
| M | 3 |   |    | 6 |   |    |   |    |
| I | 4 |   |    | 5 |   |    |   |    |
| I | 5 | ✓ |    | 4 |   |    |   |    |
| V | 6 |   | ✓  | 3 |   |    |   |    |
| G | 7 | ✓ |    | 2 |   |    |   |    |
| K | 8 | ✓ | ✓  | 1 |   |    |   |    |

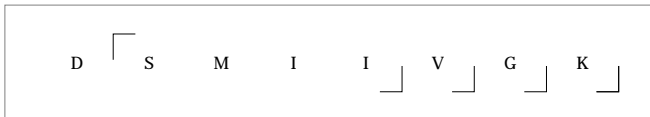

dbValid true DSMIIVGK PHOS(1) 1. 944. -1.56344 5.10253 100. ? 2094.  
 S\_Acido\_new%gi|68566881|gb|AAY79810.1| DSMIIVGK%::PHOS:.....%sample\_2%cmpd\_723

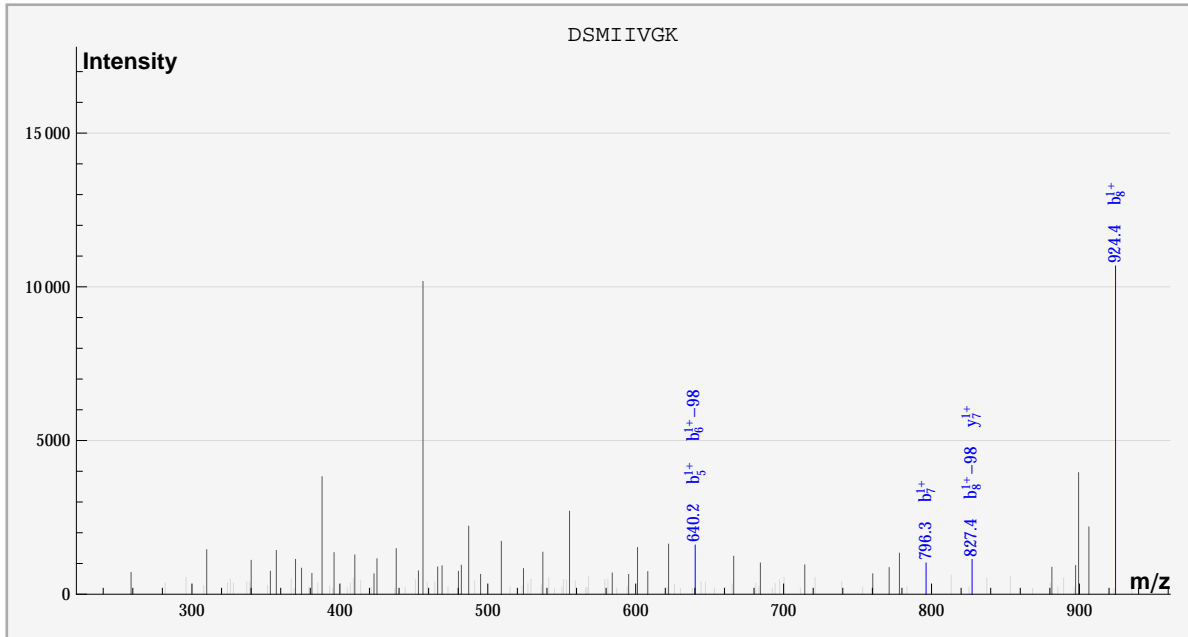

|   | # | b | b* | # | y | y* | P | P* |
|---|---|---|----|---|---|----|---|----|
| D | 1 |   |    |   |   |    |   |    |
| S | 2 |   |    | 7 | ✓ |    |   |    |
| M | 3 |   |    | 6 |   |    |   |    |
| I | 4 |   |    | 5 |   |    |   |    |
| I | 5 | ✓ |    | 4 |   |    |   |    |
| V | 6 |   | ✓  | 3 |   |    |   |    |
| G | 7 | ✓ |    | 2 |   |    |   |    |
| K | 8 | ✓ | ✓  | 1 |   |    |   |    |

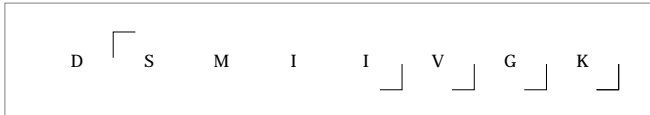

dbValid true DSMIIVGK PHOS(1) 1. 944. -1.56344 5.2809 100. ? 2106.  
 S\_Acido\_new%gi|68566881|gb|AAY79810.1| DSMIIVGK%::PHOS:::sample\_2%cmpd\_734

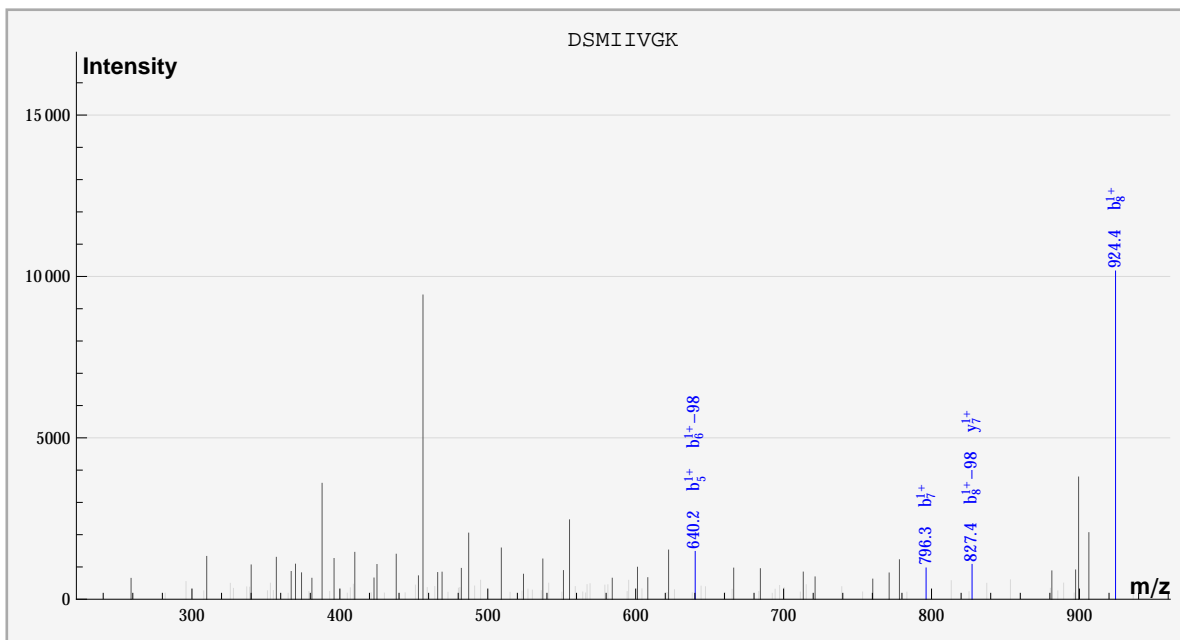

|   | # | b | b* | # | y | y* | P | P* |
|---|---|---|----|---|---|----|---|----|
| D | 1 |   |    |   |   |    |   |    |
| S | 2 |   |    | 7 | ✓ |    |   |    |
| M | 3 |   |    | 6 |   |    |   |    |
| I | 4 |   |    | 5 |   |    |   |    |
| I | 5 | ✓ |    | 4 |   |    |   |    |
| V | 6 |   | ✓  | 3 |   |    |   |    |
| G | 7 | ✓ |    | 2 |   |    |   |    |
| K | 8 | ✓ | ✓  | 1 |   |    |   |    |



dbValid true DSMIIVGK PHOS(1) 1. 944. -1.56344 5.31753 100. ? 2130.  
 S\_Acido\_new%gi|68566881|gb|AAY79810.1| DSMIIVGK%::PHOS:::sample\_2%compd\_755

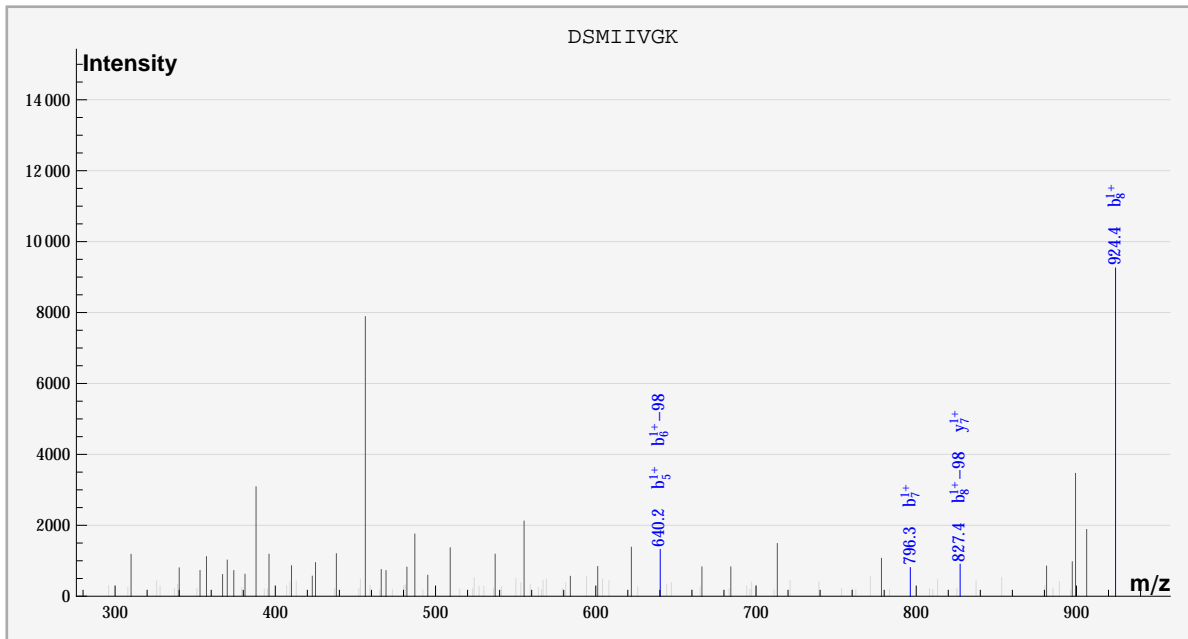

|   | # | b | b* | # | y | y* | P | P* |
|---|---|---|----|---|---|----|---|----|
| D | 1 |   |    |   |   |    |   |    |
| S | 2 |   |    | 7 | ✓ |    |   |    |
| M | 3 |   |    | 6 |   |    |   |    |
| I | 4 |   |    | 5 |   |    |   |    |
| I | 5 | ✓ |    | 4 |   |    |   |    |
| V | 6 |   | ✓  | 3 |   |    |   |    |
| G | 7 | ✓ |    | 2 |   |    |   |    |
| K | 8 | ✓ | ✓  | 1 |   |    |   |    |

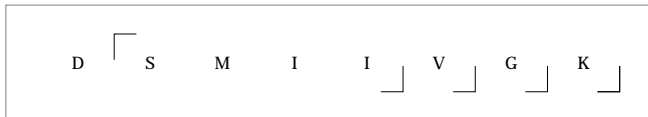

dbValid true DYEVDYDEVNSR PHOS(3) 2. 947. -1.201 5.39396 100. ? 2388.  
 S\_Acido\_new%gi|68568364|gb|AA81293.1| DYEVDYDEVNSR%::PHOS:::PHOS:::PHOS:::sample\_2%compd\_972

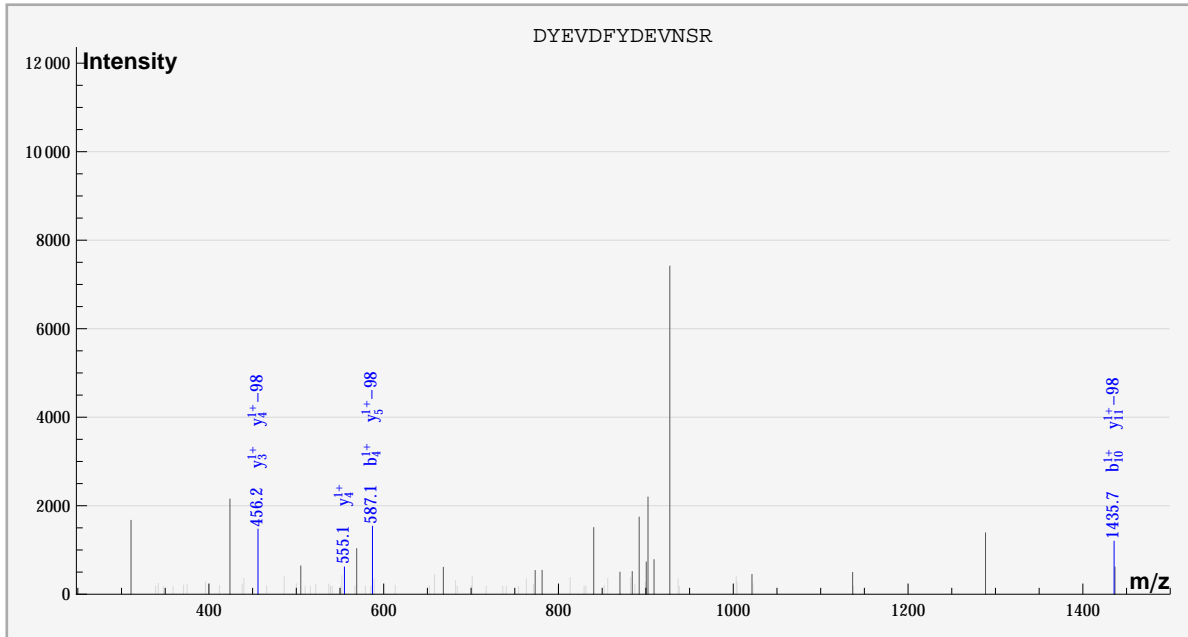

|   | #  | b | b* | #  | y | y* | P | P* |
|---|----|---|----|----|---|----|---|----|
| D | 1  |   |    |    |   |    |   |    |
| Y | 2  |   |    | 12 |   |    |   |    |
| E | 3  |   |    | 11 |   | ✓  |   |    |
| V | 4  | ✓ |    | 10 |   |    |   |    |
| D | 5  |   |    | 9  |   |    |   |    |
| F | 6  |   |    | 8  |   |    |   |    |
| Y | 7  |   |    | 7  |   |    |   |    |
| D | 8  |   |    | 6  |   |    |   |    |
| E | 9  |   |    | 5  |   | ✓  |   |    |
| V | 10 | ✓ |    | 4  | ✓ | ✓  |   |    |
| N | 11 |   |    | 3  | ✓ |    |   |    |
| S | 12 |   |    | 2  |   |    |   |    |
| R | 13 |   |    | 1  |   |    |   |    |

D Y <sup>⌈</sup>E V <sub>⌋</sub> D F Y D <sup>⌈</sup>E <sup>⌈</sup>V <sub>⌋</sub> <sup>⌈</sup>N S R

dbValid true DYEVDYDEVNSR PHOS(3) 2. 947. -1.201 5.12371 100. ? 2400.  
 S\_Acido\_new%gi|68568364|gb|AA81293.1| DYEVDYDEVNSR%::PHOS:::PHOS:::PHOS:::sample\_2%compd\_982

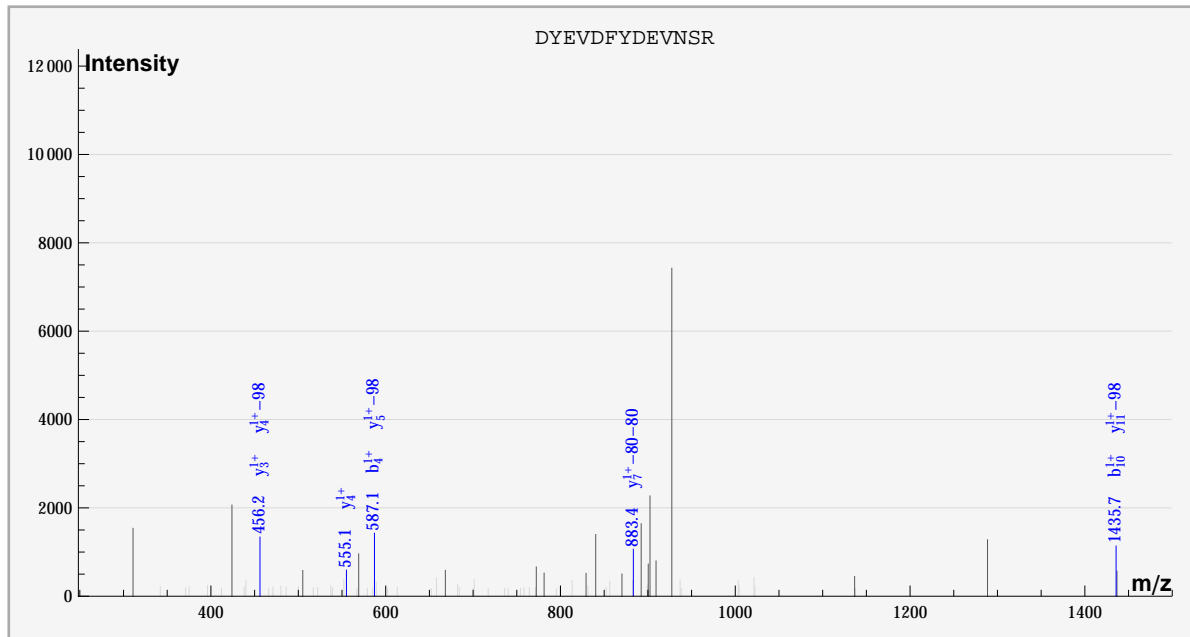

|   | #  | b | b* | #  | y | y* | P | P* |
|---|----|---|----|----|---|----|---|----|
| D | 1  |   |    |    |   |    |   |    |
| Y | 2  |   |    | 12 |   |    |   |    |
| E | 3  |   |    | 11 |   | ✓  |   |    |
| V | 4  | ✓ |    | 10 |   |    |   |    |
| D | 5  |   |    | 9  |   |    |   |    |
| F | 6  |   |    | 8  |   |    |   |    |
| Y | 7  |   |    | 7  |   | ✓  |   |    |
| D | 8  |   |    | 6  |   |    |   |    |
| E | 9  |   |    | 5  |   | ✓  |   |    |
| V | 10 | ✓ |    | 4  | ✓ | ✓  |   |    |
| N | 11 |   |    | 3  | ✓ |    |   |    |
| S | 12 |   |    | 2  |   |    |   |    |
| R | 13 |   |    | 1  |   |    |   |    |

D Y E V D F Y D E V N S R

dbValid true DYEVDYDEVNSR PHOS(3) 2. 947. -1.201 5.23382 100. ? 2508.  
 S\_Acido\_new%gi|68568364|gb|AA81293.1| DYEVDYDEVNSR%::PHOS::::PHOS::::PHOS::%sample\_2%compd\_1075

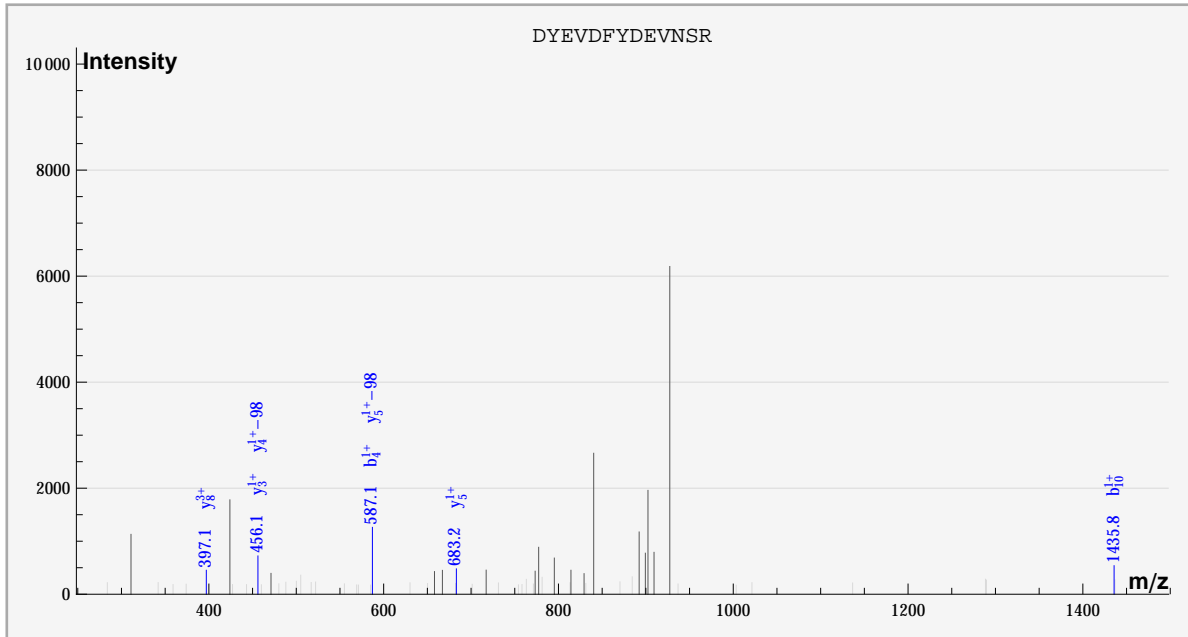

|   | #  | b | b* | #  | y | y* | P | P* |
|---|----|---|----|----|---|----|---|----|
| D | 1  |   |    |    |   |    |   |    |
| Y | 2  |   |    | 12 |   |    |   |    |
| E | 3  |   |    | 11 |   |    |   |    |
| V | 4  | ✓ |    | 10 |   |    |   |    |
| D | 5  |   |    | 9  |   |    |   |    |
| F | 6  |   |    | 8  | ✓ |    |   |    |
| Y | 7  |   |    | 7  |   |    |   |    |
| D | 8  |   |    | 6  |   |    |   |    |
| E | 9  |   |    | 5  | ✓ | ✓  |   |    |
| V | 10 | ✓ |    | 4  |   | ✓  |   |    |
| N | 11 |   |    | 3  | ✓ |    |   |    |
| S | 12 |   |    | 2  |   |    |   |    |
| R | 13 |   |    | 1  |   |    |   |    |

D Y E V D F Y D E V N S R

dbValid true MSQETTATKQEEQK Oxidation\_M(1),PHOS(3) 2. 948.  
 -0.167483 5.41352 100. ? 3198. S\_Acido\_new%g|68567858|gb|AAy80787.1|  
 MSQETTATKQEEQK%:Oxidation\_M:PHOS::PHOS:PHOS:::.....%sample\_0%compd\_1512

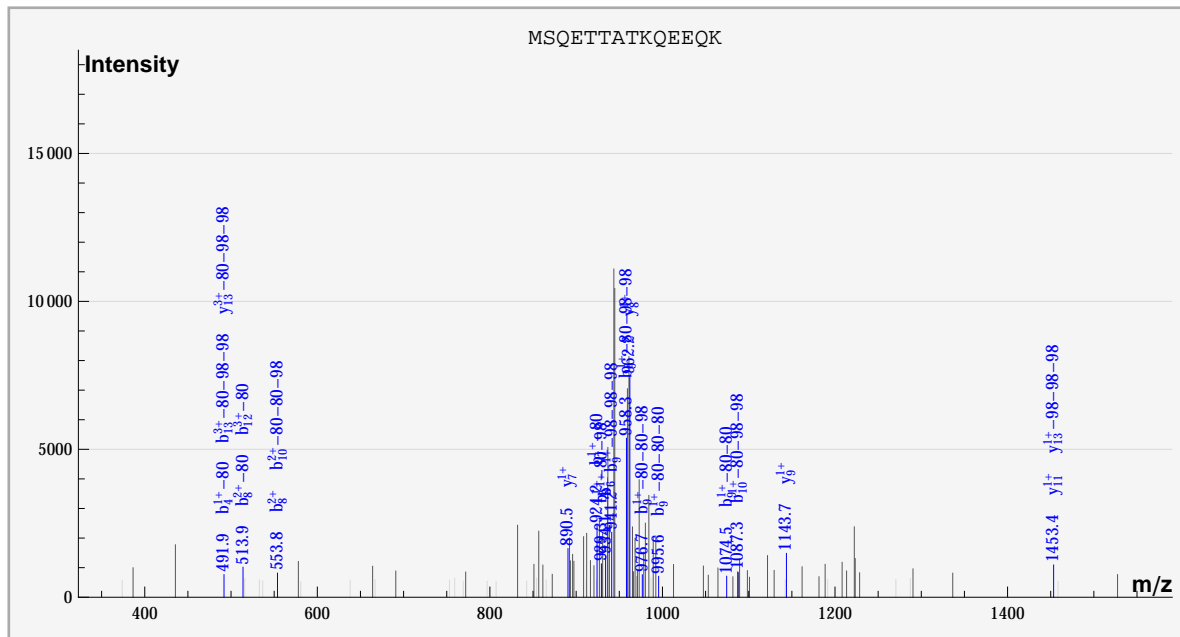

|   | #  | b | b* | #  | y | y* | P | P* |
|---|----|---|----|----|---|----|---|----|
| M | 1  |   |    |    |   |    |   |    |
| S | 2  |   |    | 13 |   | ✓  |   |    |
| Q | 3  |   |    | 12 |   |    |   |    |
| E | 4  |   | ✓  | 11 |   | ✓  |   |    |
| T | 5  |   |    | 10 |   |    |   |    |
| T | 6  | ✓ |    | 9  |   | ✓  |   |    |
| A | 7  |   | ✓  | 8  |   | ✓  |   |    |
| T | 8  | ✓ | ✓  | 7  |   | ✓  |   |    |
| K | 9  |   | ✓  | 6  |   |    |   |    |
| Q | 10 |   | ✓  | 5  |   |    |   |    |
| E | 11 |   |    | 4  |   |    |   |    |
| E | 12 |   | ✓  | 3  |   |    |   |    |
| Q | 13 |   | ✓  | 2  |   |    |   |    |
| K | 14 |   |    | 1  |   |    |   |    |

M S Q E T T A T K Q E E Q K



dbValid true MYEDILKEIDQELGK PHOS(1) 2. 951. 1.44155 5.11123 100. ? 1884.

S\_Acido\_new%gi|68567914|gb|AAY80843.1| MYEDILKEIDQELGK::PHOS:::sample\_3%compd\_564

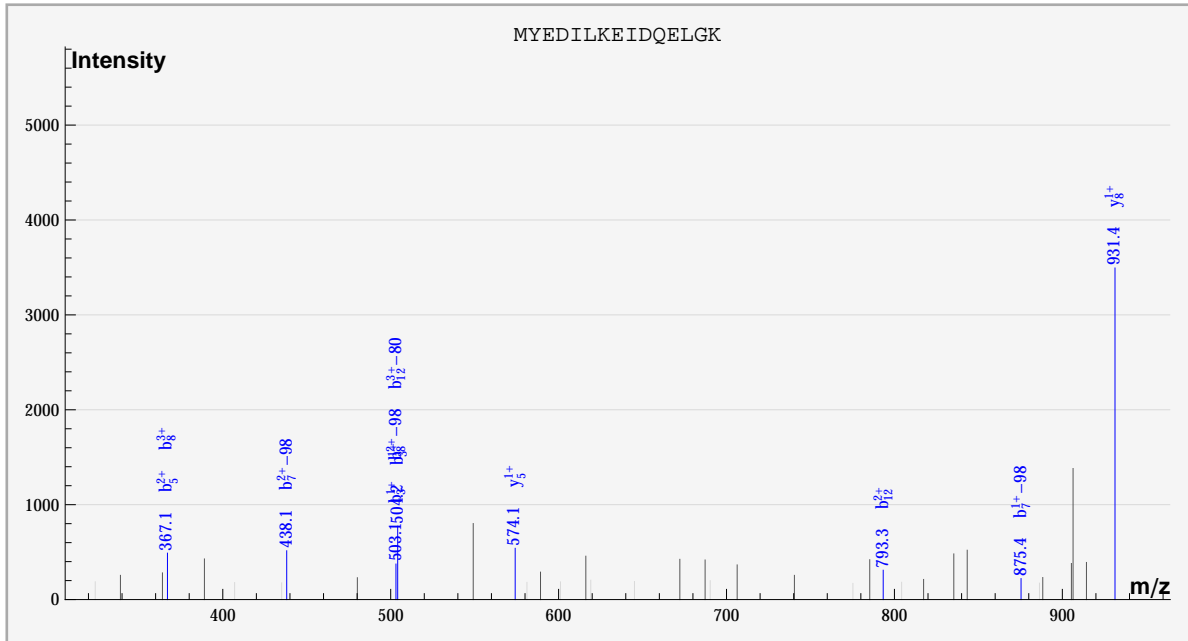

|   | #  | b | b* | #  | y | y* | P | P* |
|---|----|---|----|----|---|----|---|----|
| M | 1  |   |    |    |   |    |   |    |
| Y | 2  |   |    | 14 |   |    |   |    |
| E | 3  | ✓ |    | 13 |   |    |   |    |
| D | 4  |   |    | 12 |   |    |   |    |
| I | 5  | ✓ |    | 11 |   |    |   |    |
| L | 6  |   |    | 10 |   |    |   |    |
| K | 7  |   | ✓  | 9  |   |    |   |    |
| E | 8  | ✓ | ✓  | 8  | ✓ |    |   |    |
| I | 9  |   |    | 7  |   |    |   |    |
| D | 10 |   |    | 6  |   |    |   |    |
| Q | 11 |   |    | 5  | ✓ |    |   |    |
| E | 12 | ✓ | ✓  | 4  |   |    |   |    |
| L | 13 |   |    | 3  |   |    |   |    |
| G | 14 |   |    | 2  |   |    |   |    |
| K | 15 |   |    | 1  |   |    |   |    |

M Y E D I L K E I D Q E L G K

dbValid true MYEDILKEIDQELGK PHOS(1) 2. 951. 1.44155 5.14962 100. ? 1896.  
 S\_Acido\_new%gi|68567914|gb|AAY80843.1| MYEDILKEIDQELGK%::PHOS:::sample\_3%compd\_574

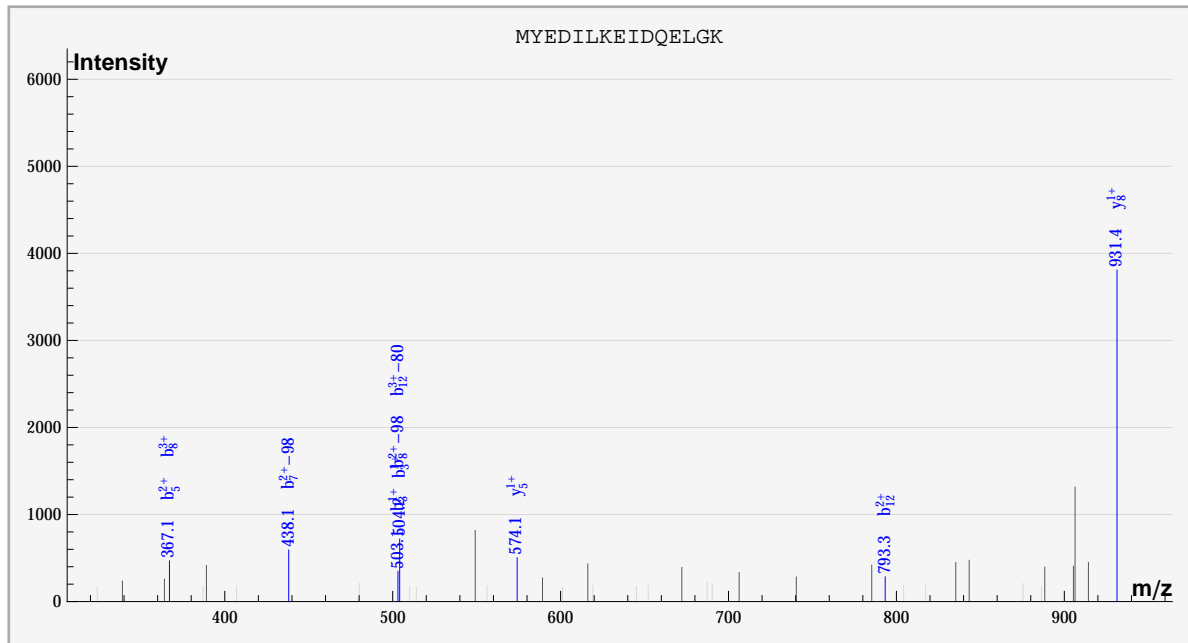

|   | #  | b | b* | #  | y | y* | P | P* |
|---|----|---|----|----|---|----|---|----|
| M | 1  |   |    |    |   |    |   |    |
| Y | 2  |   |    | 14 |   |    |   |    |
| E | 3  | ✓ |    | 13 |   |    |   |    |
| D | 4  |   |    | 12 |   |    |   |    |
| I | 5  | ✓ |    | 11 |   |    |   |    |
| L | 6  |   |    | 10 |   |    |   |    |
| K | 7  |   | ✓  | 9  |   |    |   |    |
| E | 8  | ✓ | ✓  | 8  | ✓ |    |   |    |
| I | 9  |   |    | 7  |   |    |   |    |
| D | 10 |   |    | 6  |   |    |   |    |
| Q | 11 |   |    | 5  | ✓ |    |   |    |
| E | 12 | ✓ | ✓  | 4  |   |    |   |    |
| L | 13 |   |    | 3  |   |    |   |    |
| G | 14 |   |    | 2  |   |    |   |    |
| K | 15 |   |    | 1  |   |    |   |    |

M Y E D I L K E I D Q E L G K

dbValid true AIKYKPELVKAYR PHOS(2) 2. 952. -0.530093 5.11064 100. ? 3174.  
 S\_Acido\_new%gi|68567656|gb|AAy80585.1| AIKYKPELVKAYR%::::PHOS:::::PHOS:::%sample\_3%compd\_1474

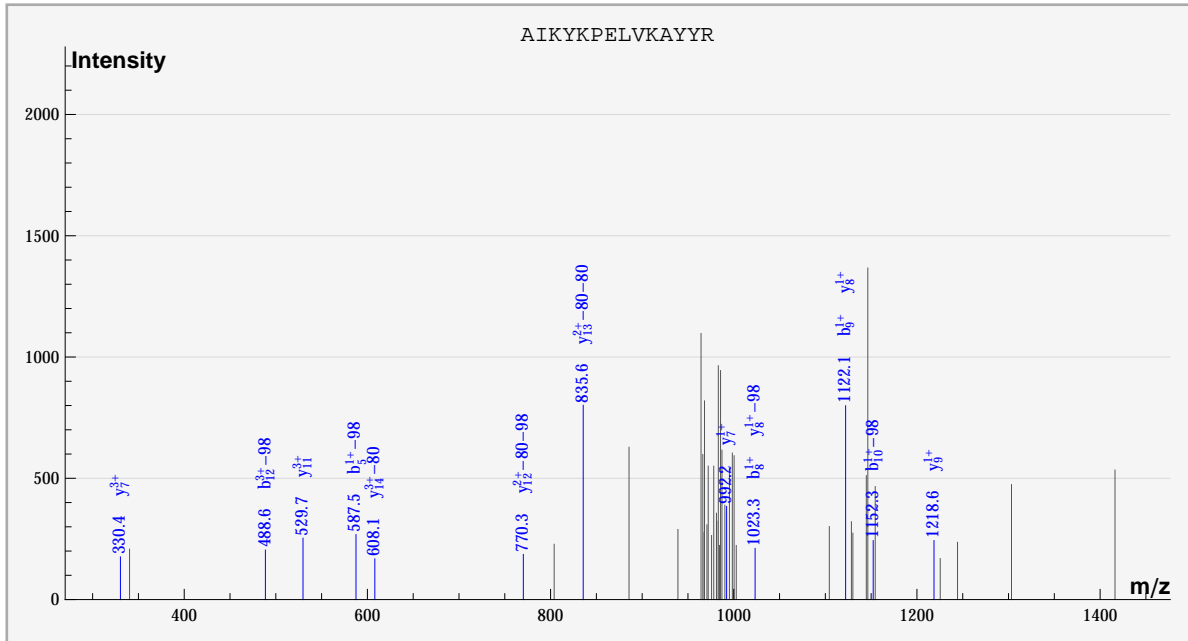

|   | #  | b | b* | #  | y | y* | P | P* |
|---|----|---|----|----|---|----|---|----|
| A | 1  |   |    |    |   |    |   | ✓  |
| I | 2  |   |    | 13 |   | ✓  |   |    |
| K | 3  |   |    | 12 |   | ✓  |   |    |
| Y | 4  |   |    | 11 | ✓ |    |   |    |
| K | 5  |   | ✓  | 10 |   |    |   |    |
| P | 6  |   |    | 9  | ✓ |    |   |    |
| E | 7  |   |    | 8  | ✓ | ✓  |   |    |
| L | 8  | ✓ |    | 7  | ✓ |    |   |    |
| V | 9  | ✓ |    | 6  |   |    |   |    |
| K | 10 |   | ✓  | 5  |   |    |   |    |
| A | 11 |   |    | 4  |   |    |   |    |
| Y | 12 |   | ✓  | 3  |   |    |   |    |
| Y | 13 |   |    | 2  |   |    |   |    |
| R | 14 |   |    | 1  |   |    |   |    |

「 A 「 I 「 K 「 Y K 「 P 「 E 「 L 「 V 「 K 「 A 「 Y 「 Y R

dbValid true AFRGRSTR PHOS(2) 1. 955. -0.640635 5.16368 100. ? 2868.  
 S\_Acido\_new%gi|68567055|gb|AA79984.1| AFRGRSTR%:::PHOS:PHOS::sample\_3%compd\_1227

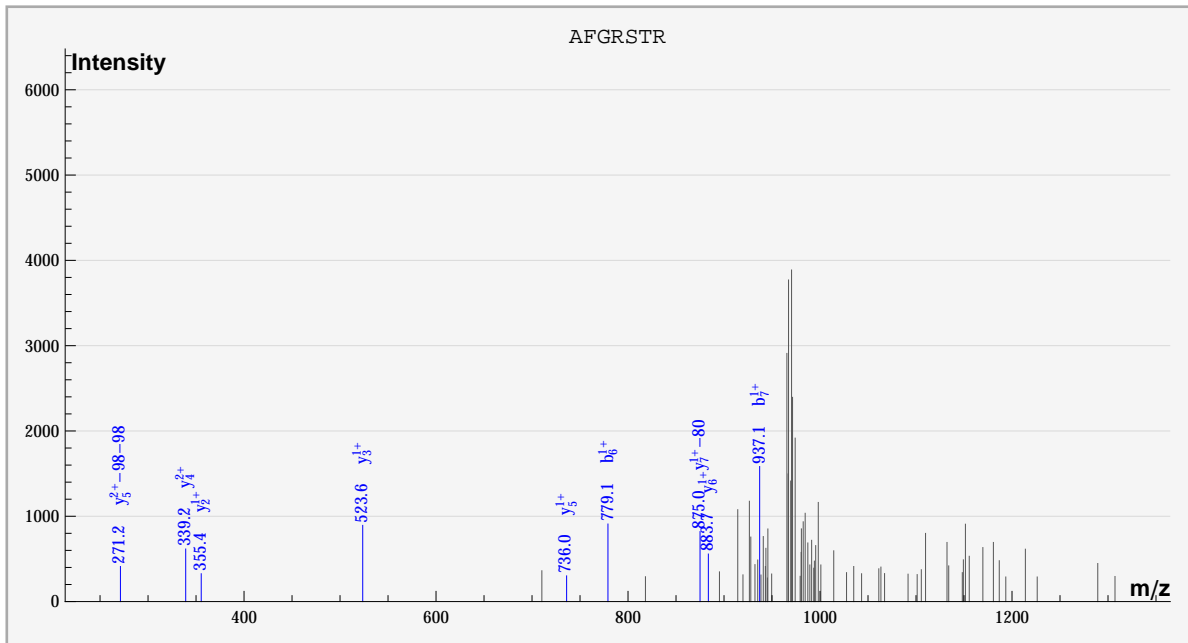

|   | # | b | b* | # | y | y* | P | P* |
|---|---|---|----|---|---|----|---|----|
| A | 1 |   |    |   |   |    |   | ✓  |
| F | 2 |   |    | 6 | ✓ |    |   |    |
| G | 3 |   |    | 5 | ✓ | ✓  |   |    |
| R | 4 |   |    | 4 | ✓ |    |   |    |
| S | 5 |   |    | 3 | ✓ |    |   |    |
| T | 6 | ✓ |    | 2 | ✓ |    |   |    |
| R | 7 | ✓ |    | 1 |   |    |   |    |

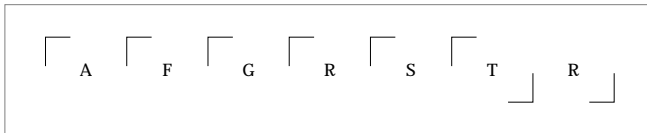

dbValid true TYAERR PHOS(2) 1. 956. -0.656615 5.30651 100. ? 1956.  
 S\_Acido\_new%gi|68568591|gb|AAy81520.1| TYAERR%:PHOS:PHOS::::%sample\_3%cmpd\_632

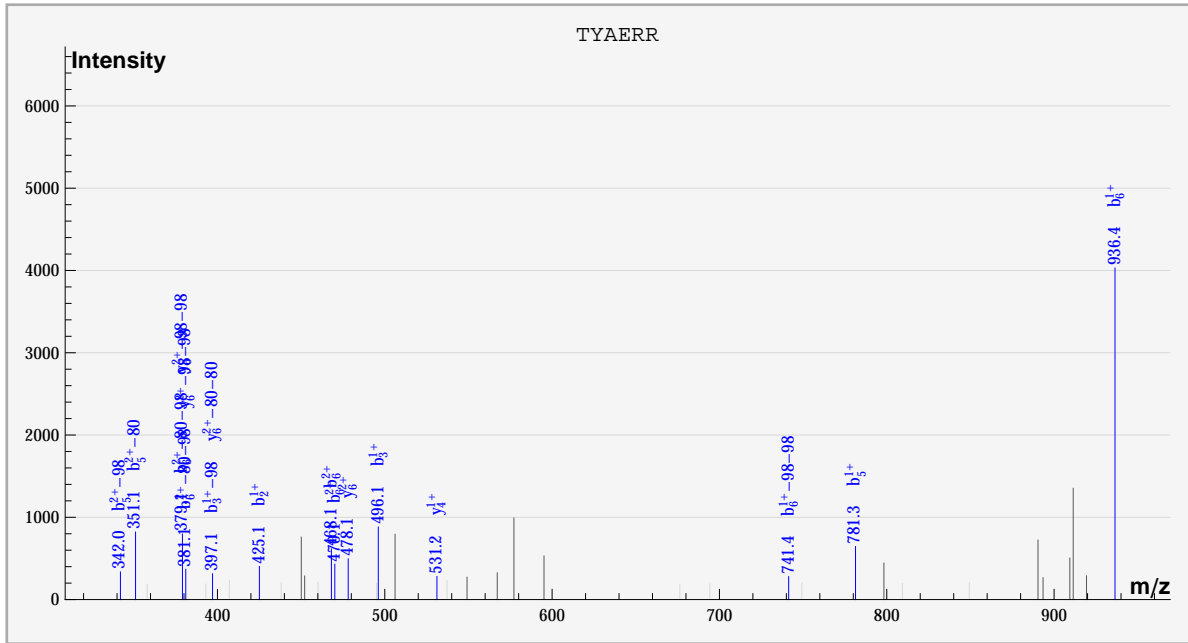

|   | # | b | b* | # | y | y* | P | P* |
|---|---|---|----|---|---|----|---|----|
| T | 1 |   |    |   |   |    | ✓ | ✓  |
| Y | 2 | ✓ |    | 5 |   |    |   |    |
| A | 3 | ✓ | ✓  | 4 | ✓ |    |   |    |
| E | 4 |   |    | 3 |   |    |   |    |
| R | 5 | ✓ | ✓  | 2 |   |    |   |    |
| R | 6 | ✓ | ✓  | 1 |   |    |   |    |

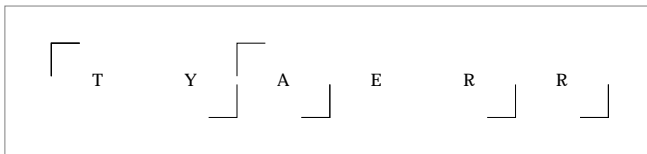

dbValid true TYAERR PHOS(2) 1. 956. -0.656615 5.10974 100. ? 1968.  
 S\_Acido\_new%gi|68568591|gb|AAy81520.1| TYAERR%:PHOS:PHOS::::%sample\_3%cmpd\_642

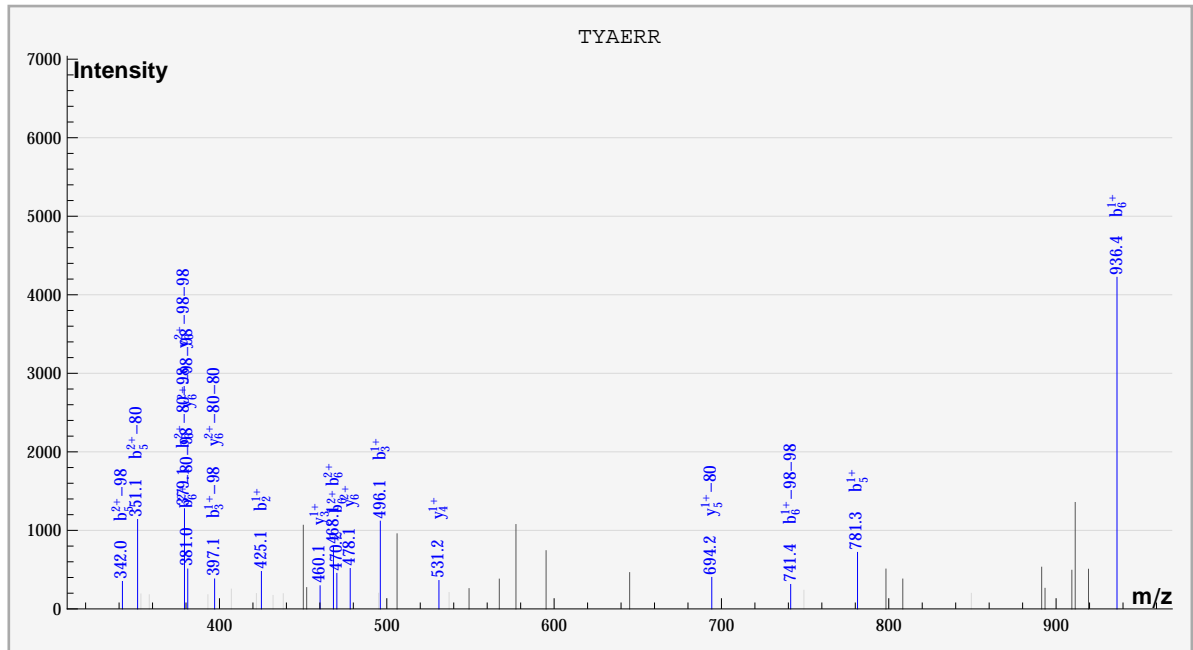

|   | # | b | b* | # | y | y* | P | P* |
|---|---|---|----|---|---|----|---|----|
| T | 1 |   |    |   |   |    | ✓ | ✓  |
| Y | 2 | ✓ |    | 5 | ✓ |    |   |    |
| A | 3 | ✓ | ✓  | 4 | ✓ |    |   |    |
| E | 4 |   |    | 3 | ✓ |    |   |    |
| R | 5 | ✓ | ✓  | 2 |   |    |   |    |
| R | 6 | ✓ | ✓  | 1 |   |    |   |    |

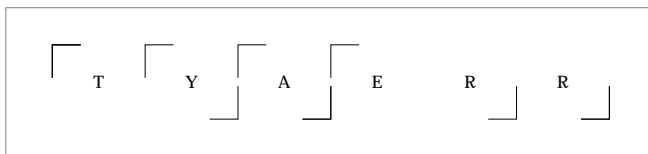

dbValid true TYAERR PHOS(2) 1. 956. -0.656615 5.25001 100. ? 1980.

S\_Acido\_new%gi|68568591|gb|AAy81520.1| TYAERR%:PHOS:PHOS:::%sample\_3%cmpd\_653

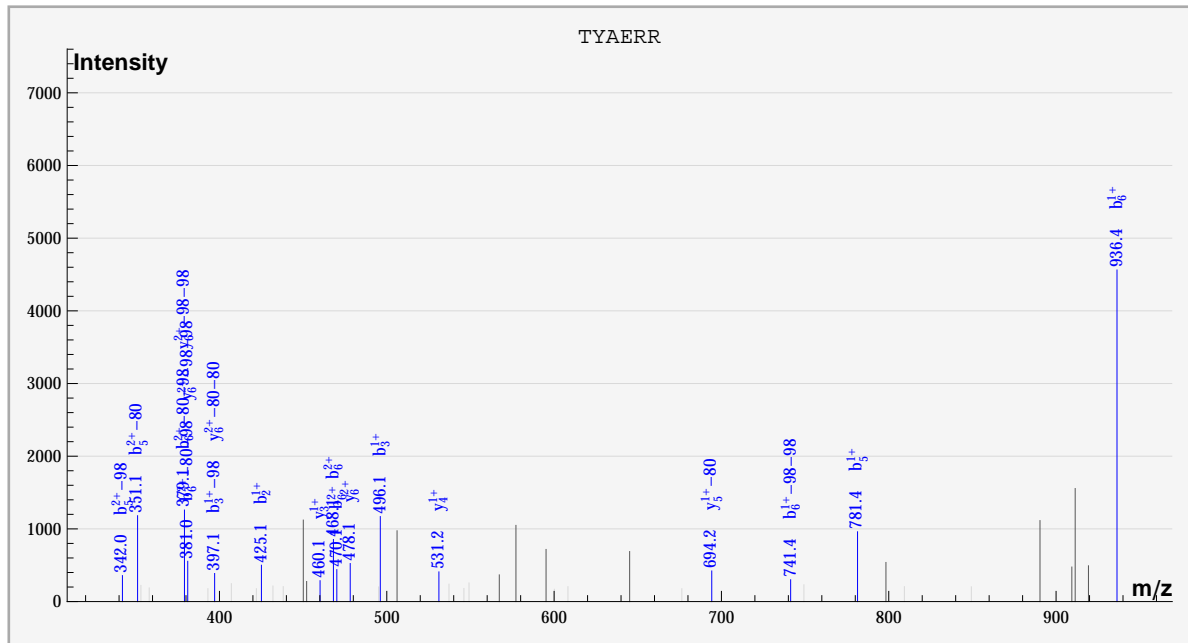

|   | # | b | b* | # | y | y* | P | P* |
|---|---|---|----|---|---|----|---|----|
| T | 1 |   |    |   |   |    | ✓ | ✓  |
| Y | 2 | ✓ |    | 5 |   | ✓  |   |    |
| A | 3 | ✓ | ✓  | 4 | ✓ |    |   |    |
| E | 4 |   |    | 3 | ✓ |    |   |    |
| R | 5 | ✓ | ✓  | 2 |   |    |   |    |
| R | 6 | ✓ | ✓  | 1 |   |    |   |    |

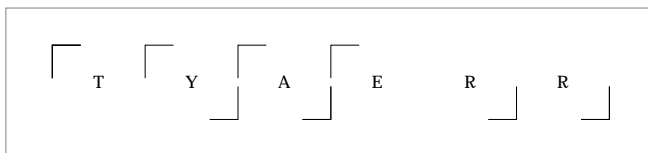

dbValid true TYAERR PHOS(2) 1. 956. -0.656615 5.18975 100. ? 1992.  
 S\_Acido\_new%gi|68568591|gb|AAy81520.1| TYAERR%:PHOS:PHOS::::%sample\_3%cmpd\_663

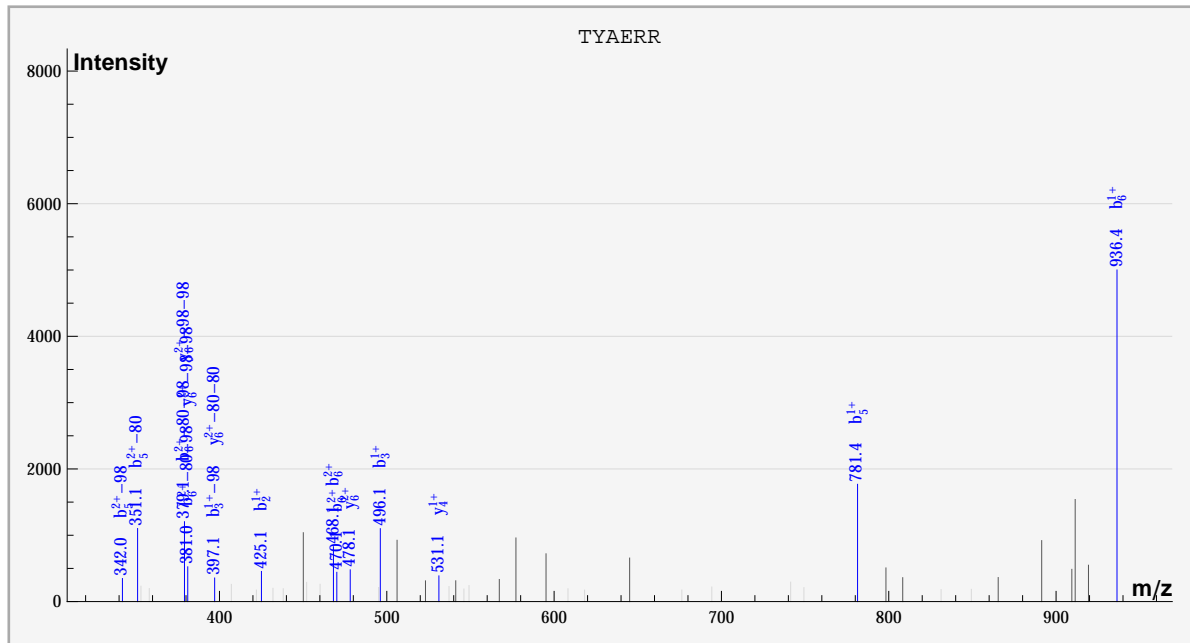

|   | # | b | b* | # | y | y* | P | P* |
|---|---|---|----|---|---|----|---|----|
| T | 1 |   |    |   |   |    | ✓ | ✓  |
| Y | 2 | ✓ |    | 5 |   |    |   |    |
| A | 3 | ✓ | ✓  | 4 | ✓ |    |   |    |
| E | 4 |   |    | 3 |   |    |   |    |
| R | 5 | ✓ | ✓  | 2 |   |    |   |    |
| R | 6 | ✓ | ✓  | 1 |   |    |   |    |

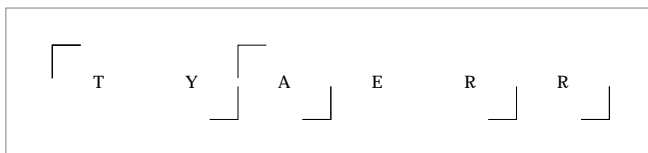



dbValid true TYAERR PHOS(2) 1. 957. -1.65662 6.04758 100. ? 1968.  
 S\_Acido\_new%gi|68568591|gb|AA81520.1| TYAERR%:PHOS:PHOS::::%sample\_3%cmpd\_643

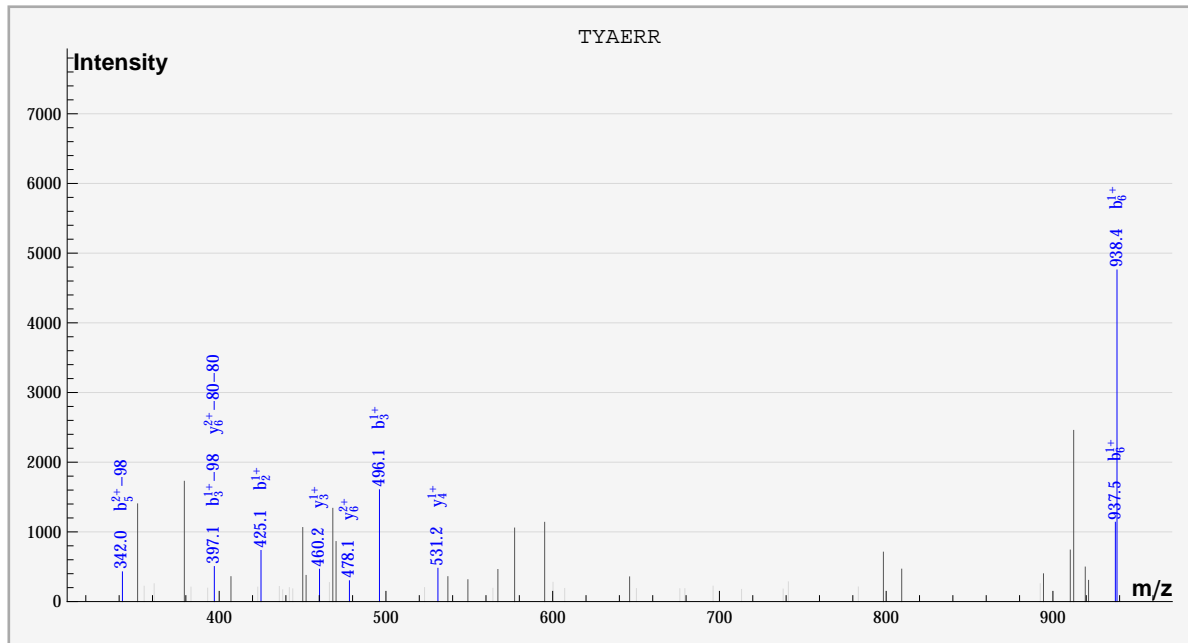

|   | # | b | b* | # | y | y* | P | P* |
|---|---|---|----|---|---|----|---|----|
| T | 1 |   |    |   |   |    | ✓ | ✓  |
| Y | 2 | ✓ |    | 5 |   |    |   |    |
| A | 3 | ✓ | ✓  | 4 | ✓ |    |   |    |
| E | 4 |   |    | 3 | ✓ |    |   |    |
| R | 5 |   | ✓  | 2 |   |    |   |    |
| R | 6 | ✓ |    | 1 |   |    |   |    |

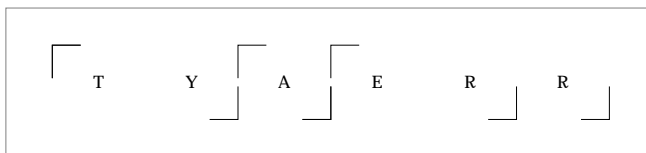

dbValid true TYAERR PHOS(2) 1. 957. -1.65662 5.98255 100. ? 1980.  
 S\_Acido\_new%gi|68568591|gb|AA81520.1| TYAERR%:PHOS:PHOS::::%sample\_3%cmpd\_654

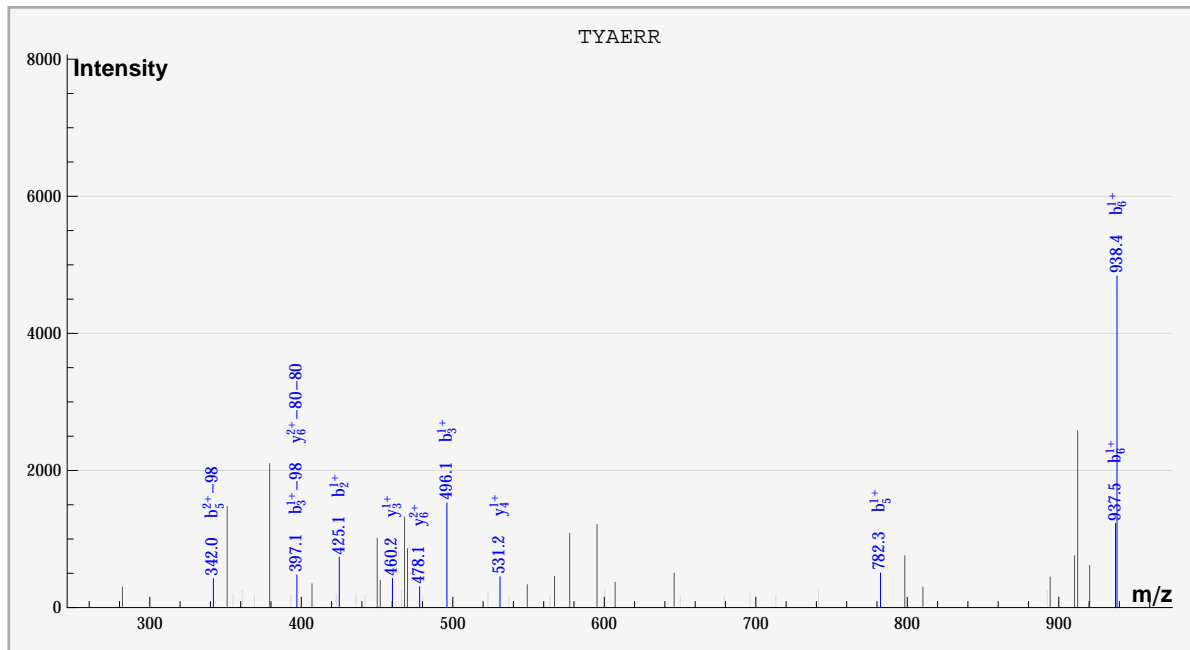

|   | # | b | b* | # | y | y* | P | P* |
|---|---|---|----|---|---|----|---|----|
| T | 1 |   |    |   |   |    | ✓ | ✓  |
| Y | 2 | ✓ |    | 5 |   |    |   |    |
| A | 3 | ✓ | ✓  | 4 | ✓ |    |   |    |
| E | 4 |   |    | 3 | ✓ |    |   |    |
| R | 5 | ✓ | ✓  | 2 |   |    |   |    |
| R | 6 | ✓ |    | 1 |   |    |   |    |

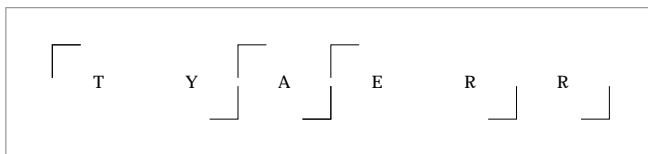

dbValid true TYAERR PHOS(2) 1. 957. -1.65662 5.63297 100. ? 1992.  
 S\_Acido\_new%gi|68568591|gb|AAy81520.1| TYAERR%:PHOS:PHOS::::%sample\_3%compd\_664

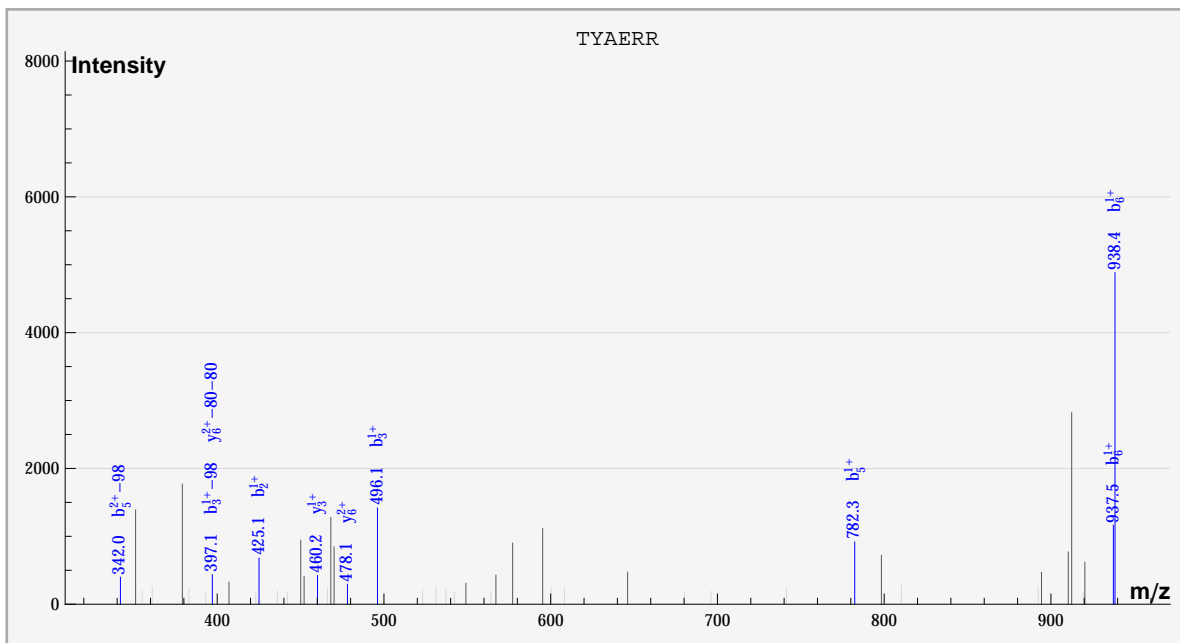

|   | # | b | b* | # | y | y* | P | P* |
|---|---|---|----|---|---|----|---|----|
| T | 1 |   |    |   |   |    | ✓ | ✓  |
| Y | 2 | ✓ |    | 5 |   |    |   |    |
| A | 3 | ✓ | ✓  | 4 |   |    |   |    |
| E | 4 |   |    | 3 | ✓ |    |   |    |
| R | 5 | ✓ | ✓  | 2 |   |    |   |    |
| R | 6 | ✓ |    | 1 |   |    |   |    |

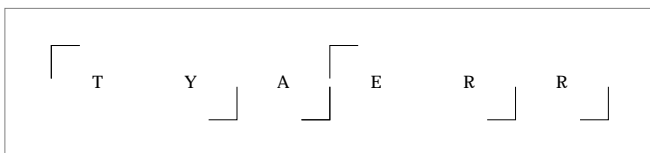

dbValid true TYAERR PHOS(2) 1. 957. -1.65662 5.7966 100. ? 2010.  
 S\_Acido\_new%gi|68568591|gb|AAY81520.1| TYAERR%:PHOS:PHOS::::%sample\_3%compd\_674

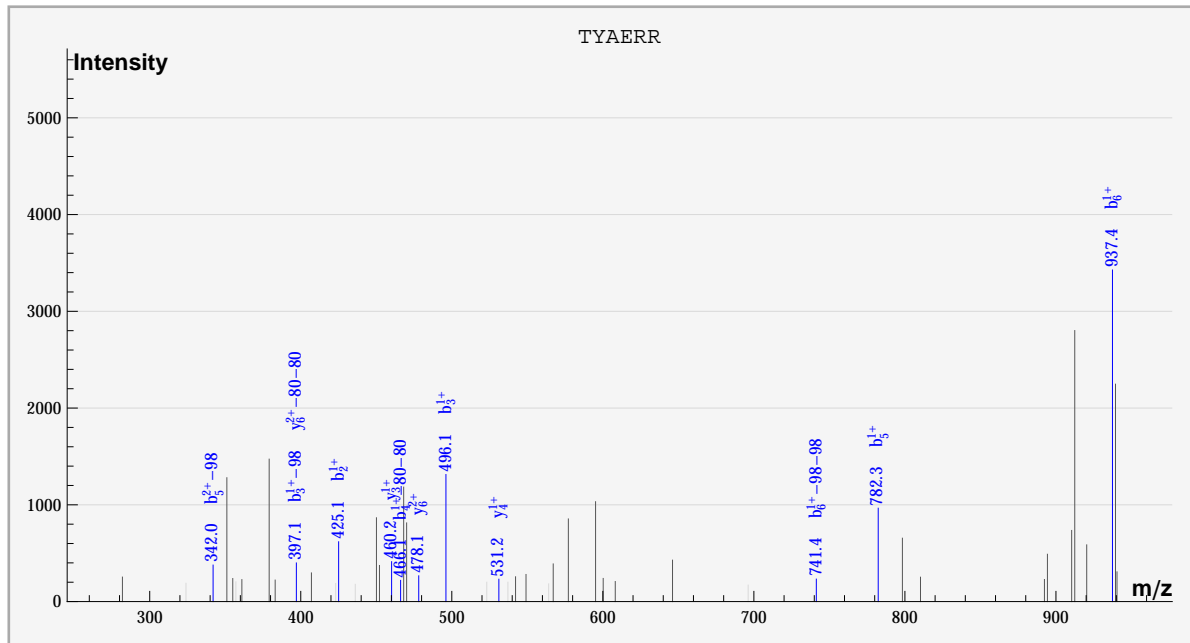

|   | # | b | b* | # | y | y* | P | P* |
|---|---|---|----|---|---|----|---|----|
| T | 1 |   |    |   |   |    | ✓ | ✓  |
| Y | 2 | ✓ |    | 5 |   |    |   |    |
| A | 3 | ✓ | ✓  | 4 | ✓ |    |   |    |
| E | 4 |   | ✓  | 3 | ✓ |    |   |    |
| R | 5 | ✓ | ✓  | 2 |   |    |   |    |
| R | 6 | ✓ | ✓  | 1 |   |    |   |    |

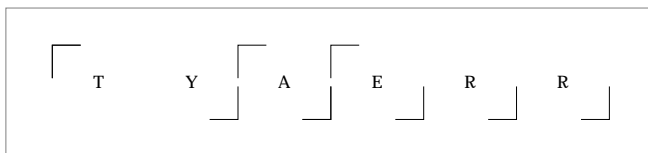

dbValid true TYAERR PHOS(2) 1. 957. -1.65662 5.58717 100. ? 2022.  
 S\_Acido\_new%gi|68568591|gb|AAy81520.1| TYAERR%:PHOS:PHOS::::%sample\_3%compd\_684

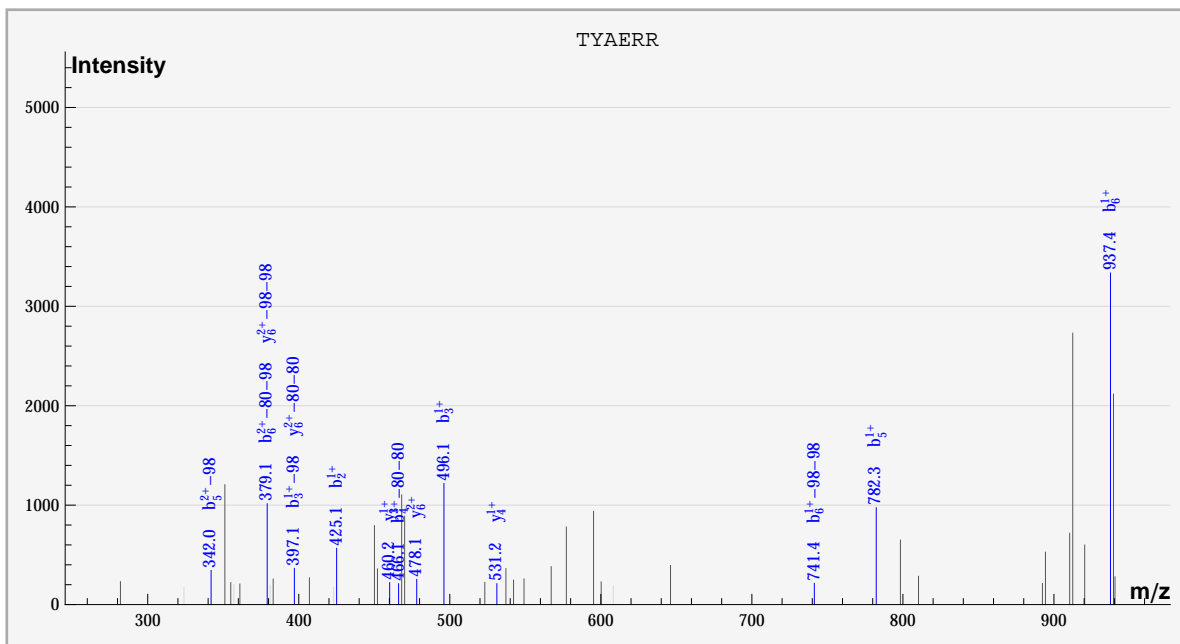

|   | # | b | b* | # | y | y* | P | P* |
|---|---|---|----|---|---|----|---|----|
| T | 1 |   |    |   |   |    | ✓ | ✓  |
| Y | 2 | ✓ |    | 5 |   |    |   |    |
| A | 3 | ✓ | ✓  | 4 | ✓ |    |   |    |
| E | 4 |   | ✓  | 3 | ✓ |    |   |    |
| R | 5 | ✓ | ✓  | 2 |   |    |   |    |
| R | 6 | ✓ | ✓  | 1 |   |    |   |    |

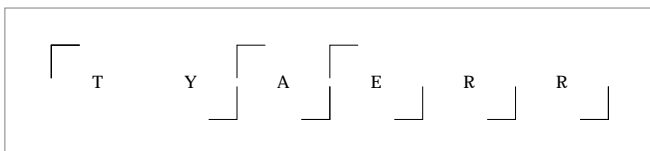

dbValid true TYAERR PHOS(2) 1. 957. -1.65662 5.44007 100. ? 2034.  
 S\_Acido\_new%gi|68568591|gb|AA81520.1| TYAERR%:PHOS:PHOS::::%sample\_3%compd\_695

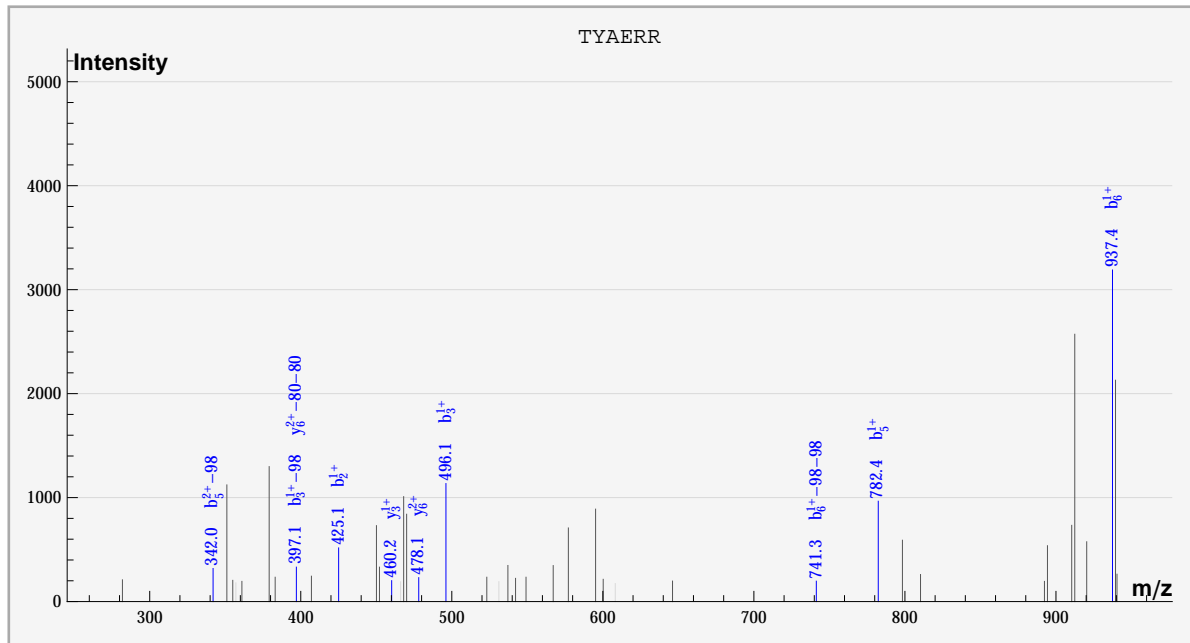

|   | # | b | b* | # | y | y* | P | P* |
|---|---|---|----|---|---|----|---|----|
| T | 1 |   |    |   |   |    | ✓ | ✓  |
| Y | 2 | ✓ |    | 5 |   |    |   |    |
| A | 3 | ✓ | ✓  | 4 |   |    |   |    |
| E | 4 |   |    | 3 | ✓ |    |   |    |
| R | 5 | ✓ | ✓  | 2 |   |    |   |    |
| R | 6 | ✓ | ✓  | 1 |   |    |   |    |

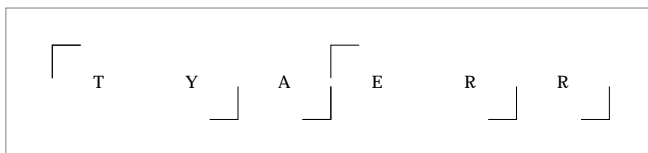

dbValid true TYAERR PHOS(2) 1. 957. -1.65662 5.59285 100. ? 2046.  
 S\_Acido\_new%gi|68568591|gb|AA81520.1| TYAERR%:PHOS:PHOS::::%sample\_3%compd\_706

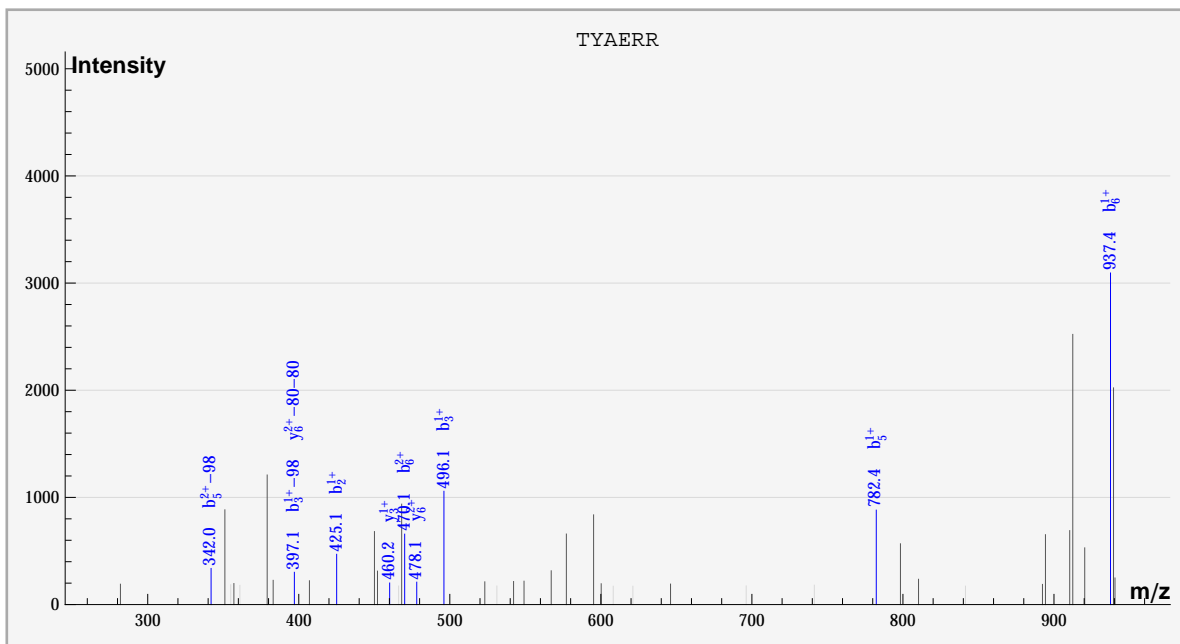

|   | # | b | b* | # | y | y* | P | P* |
|---|---|---|----|---|---|----|---|----|
| T | 1 |   |    |   |   |    | ✓ | ✓  |
| Y | 2 | ✓ |    | 5 |   |    |   |    |
| A | 3 | ✓ | ✓  | 4 |   |    |   |    |
| E | 4 |   |    | 3 | ✓ |    |   |    |
| R | 5 | ✓ | ✓  | 2 |   |    |   |    |
| R | 6 | ✓ |    | 1 |   |    |   |    |

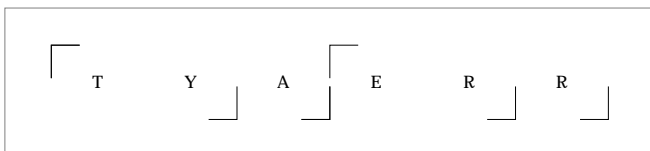

dbValid true TYAERR PHOS(2) 1. 957. -1.65662 5.88782 100. ? 2082.  
 S\_Acido\_new%gi|68568591|gb|AA81520.1| TYAERR%:PHOS:PHOS::::%sample\_3%compd\_738

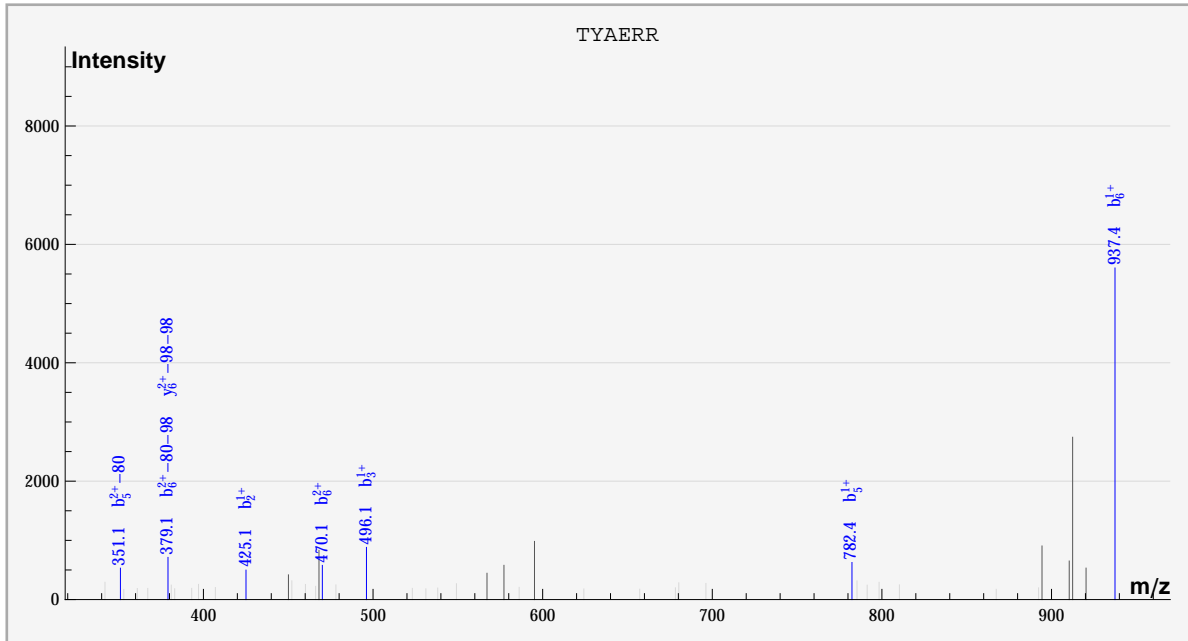

|   | # | b | b* | # | y | y* | P | P* |
|---|---|---|----|---|---|----|---|----|
| T | 1 |   |    |   |   |    |   | ✓  |
| Y | 2 | ✓ |    | 5 |   |    |   |    |
| A | 3 | ✓ |    | 4 |   |    |   |    |
| E | 4 |   |    | 3 |   |    |   |    |
| R | 5 | ✓ | ✓  | 2 |   |    |   |    |
| R | 6 | ✓ | ✓  | 1 |   |    |   |    |

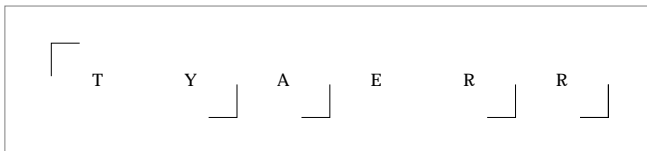



dbValid true YIRAIK PHOS(1) 1. 958. -1.46716 5.2385 100. ? 1644.  
 S\_Acido\_new%gi|68568190|gb|AAY81119.1| YIRAIK%:PHOS::::::%sample\_3%compd\_363

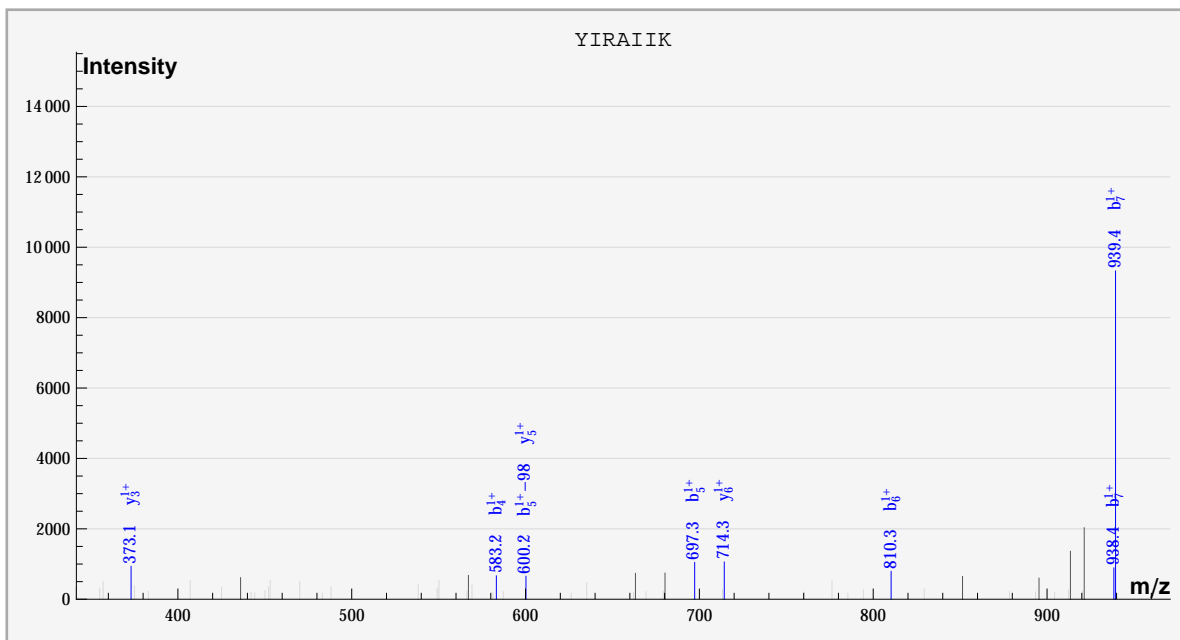

|   | # | b | b* | # | y | y* | P | P* |
|---|---|---|----|---|---|----|---|----|
| Y | 1 |   |    |   |   |    |   |    |
| I | 2 |   |    | 6 | ✓ |    |   |    |
| R | 3 |   |    | 5 | ✓ |    |   |    |
| A | 4 | ✓ |    | 4 |   |    |   |    |
| I | 5 | ✓ | ✓  | 3 | ✓ |    |   |    |
| I | 6 | ✓ |    | 2 |   |    |   |    |
| K | 7 | ✓ |    | 1 |   |    |   |    |

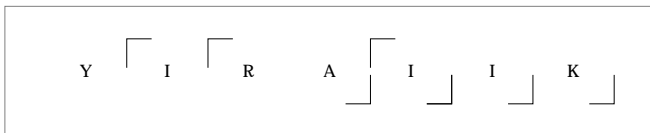

dbValid true YIRAIK PHOS(1) 1. 958. -1.46716 5.58238 100. ? 1656.

S\_Acido\_new%gi|68568190|gb|AAY81119.1| YIRAIK%:PHOS:.....%sample\_3%cmpd\_373

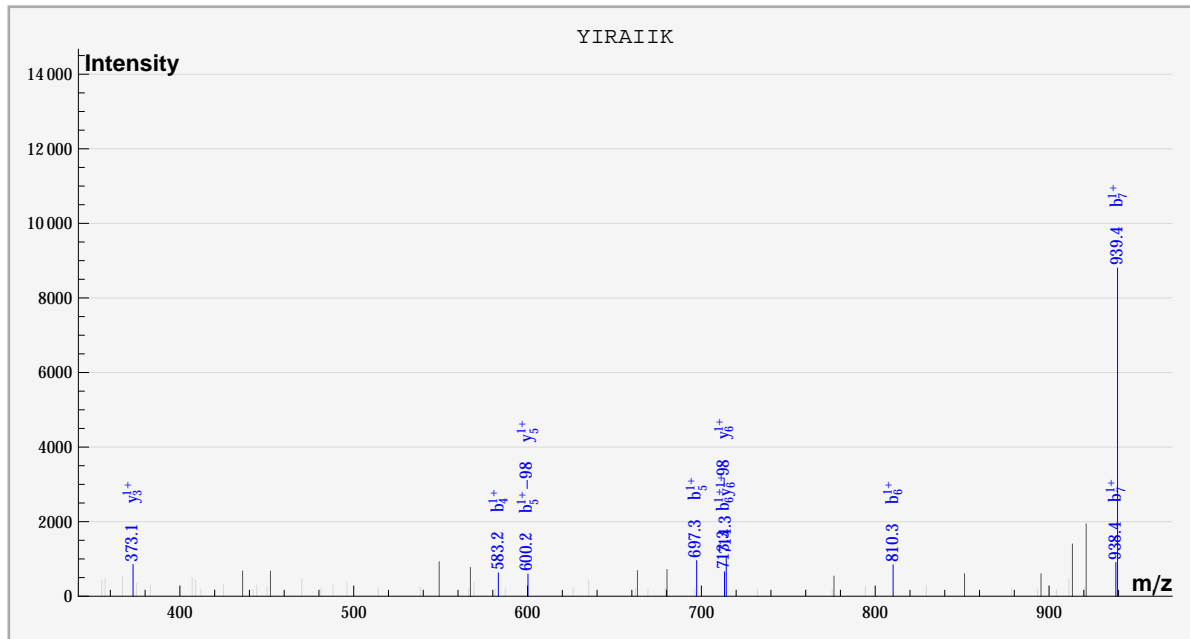

|   | # | b | b* | # | y | y* | P | P* |
|---|---|---|----|---|---|----|---|----|
| Y | 1 |   |    |   |   |    |   |    |
| I | 2 |   |    | 6 | ✓ |    |   |    |
| R | 3 |   |    | 5 | ✓ |    |   |    |
| A | 4 | ✓ |    | 4 |   |    |   |    |
| I | 5 | ✓ | ✓  | 3 | ✓ |    |   |    |
| I | 6 | ✓ | ✓  | 2 |   |    |   |    |
| K | 7 | ✓ |    | 1 |   |    |   |    |

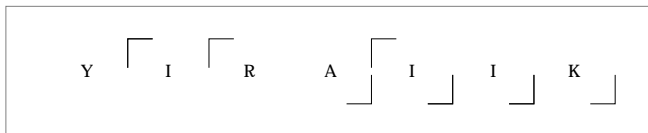

dbValid true YIRAIK PHOS(1) 1. 958. -1.46716 5.55023 100. ? 1680.  
 S\_Acido\_new%gi|68568190|gb|AAY81119.1| YIRAIK%:PHOS:.....%sample\_3%cmpd\_395

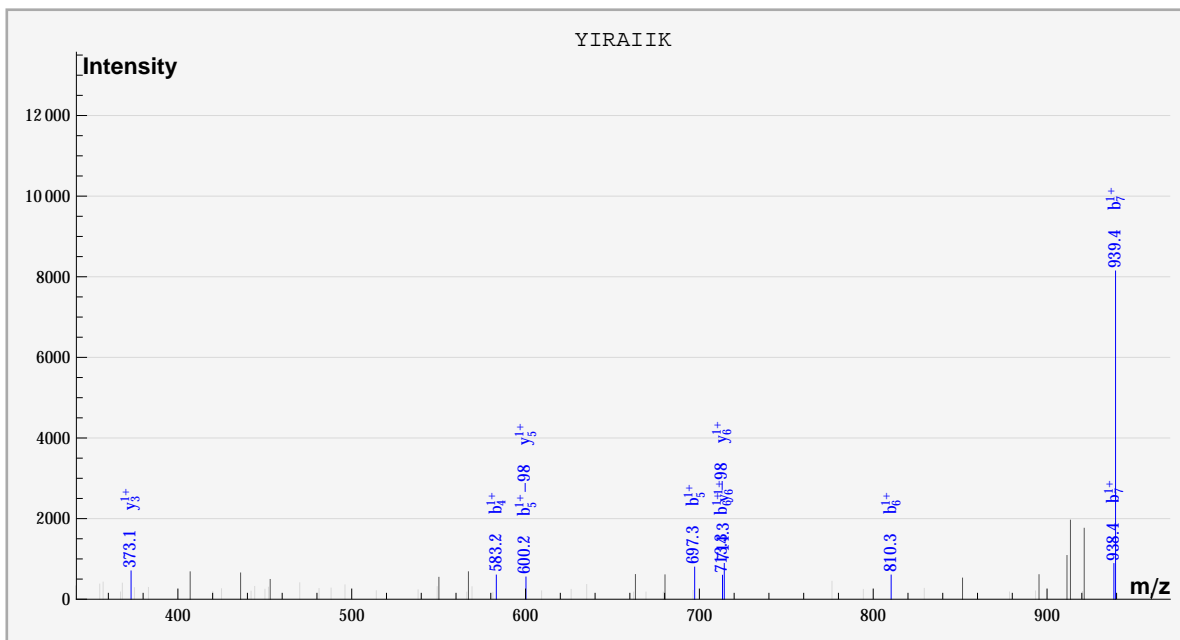

|   | # | b | b* | # | y | y* | P | P* |
|---|---|---|----|---|---|----|---|----|
| Y | 1 |   |    |   |   |    |   |    |
| I | 2 |   |    | 6 | ✓ |    |   |    |
| R | 3 |   |    | 5 | ✓ |    |   |    |
| A | 4 | ✓ |    | 4 |   |    |   |    |
| I | 5 | ✓ | ✓  | 3 | ✓ |    |   |    |
| I | 6 | ✓ | ✓  | 2 |   |    |   |    |
| K | 7 | ✓ |    | 1 |   |    |   |    |

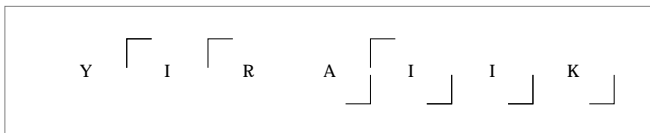

dbValid true YIRAIK PHOS(1) 1. 958. -1.46716 5.10558 100. ? 1692.  
 S\_Acido\_new%gi|68568190|gb|AAY81119.1| YIRAIK%:PHOS:.....%sample\_3%cmpd\_405

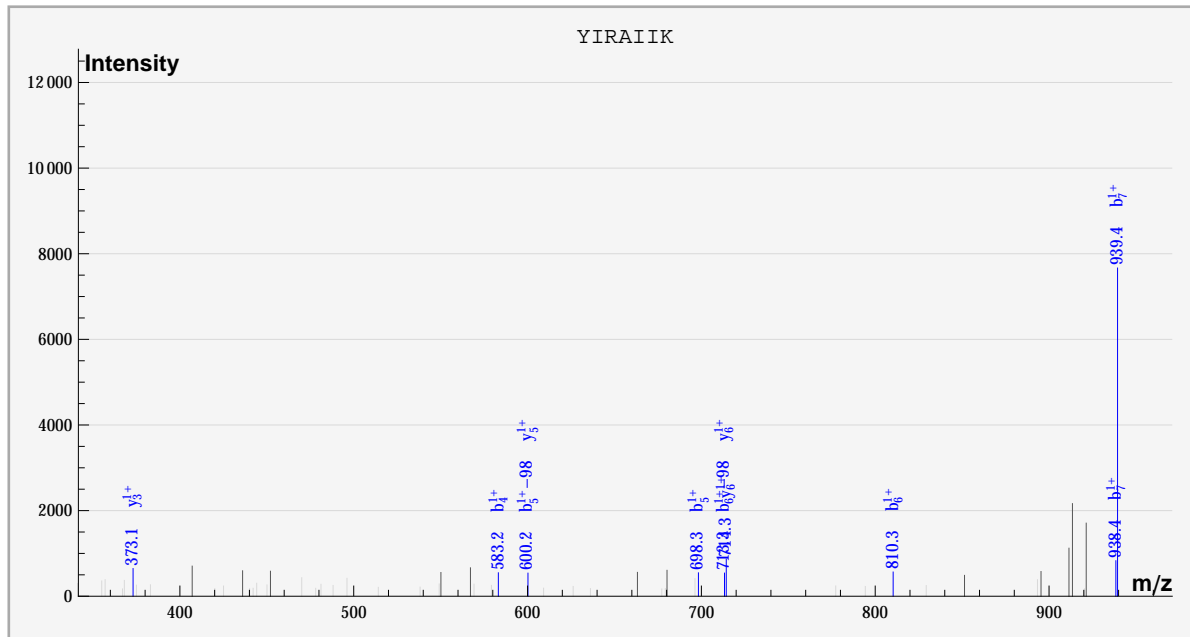

|   | # | b | b* | # | y | y* | P | P* |
|---|---|---|----|---|---|----|---|----|
| Y | 1 |   |    |   |   |    |   |    |
| I | 2 |   |    | 6 | ✓ |    |   |    |
| R | 3 |   |    | 5 | ✓ |    |   |    |
| A | 4 | ✓ |    | 4 |   |    |   |    |
| I | 5 | ✓ | ✓  | 3 | ✓ |    |   |    |
| I | 6 | ✓ | ✓  | 2 |   |    |   |    |
| K | 7 | ✓ |    | 1 |   |    |   |    |



dbValid true YIRAIK PHOS(1) 1. 958. -1.46716 5.5819 100. ? 1704.  
 S\_Acido\_new%gi68568190|gb|AAY81119.1| YIRAIK%:PHOS:.....%sample\_3%cmpd\_416

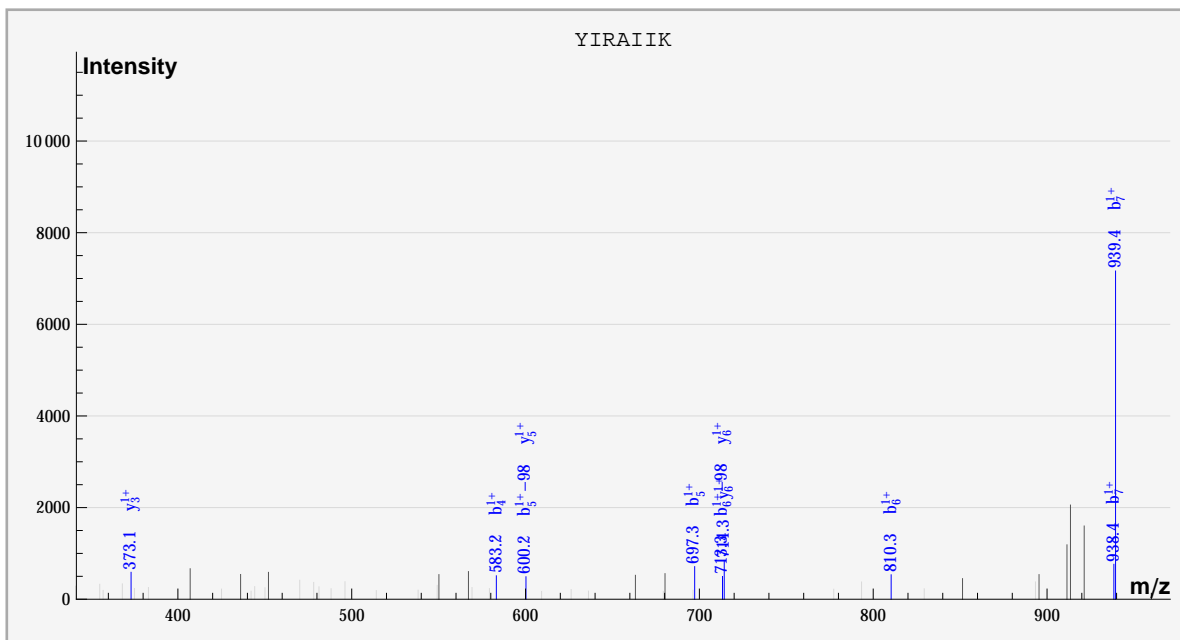

|   | # | b | b* | # | y | y* | P | P* |
|---|---|---|----|---|---|----|---|----|
| Y | 1 |   |    |   |   |    |   |    |
| I | 2 |   |    | 6 | ✓ |    |   |    |
| R | 3 |   |    | 5 | ✓ |    |   |    |
| A | 4 | ✓ |    | 4 |   |    |   |    |
| I | 5 | ✓ | ✓  | 3 | ✓ |    |   |    |
| I | 6 | ✓ | ✓  | 2 |   |    |   |    |
| K | 7 | ✓ |    | 1 |   |    |   |    |



dbValid true YIRAIK PHOS(1) 1. 958. -1.46716 5.22853 100. ? 1740.  
 S\_Acido\_new%gi68568190|gb|AAY81119.1| YIRAIK%:PHOS:.....%sample\_3%compd\_447

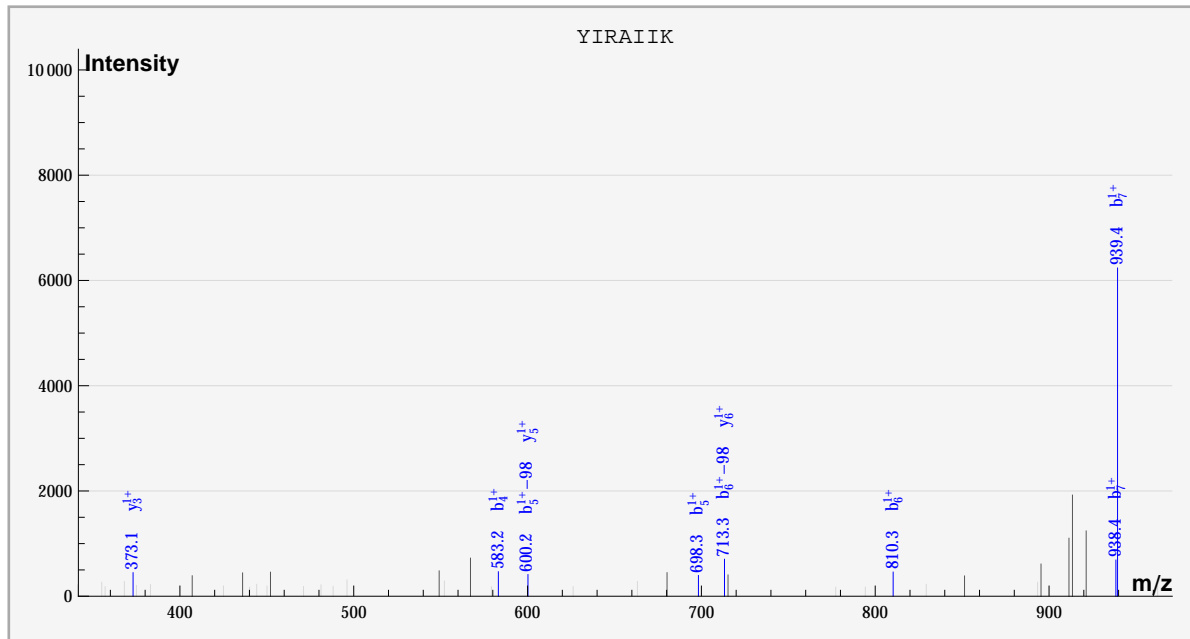

|   | # | b | b* | # | y | y* | P | P* |
|---|---|---|----|---|---|----|---|----|
| Y | 1 |   |    |   |   |    |   |    |
| I | 2 |   |    | 6 | ✓ |    |   |    |
| R | 3 |   |    | 5 | ✓ |    |   |    |
| A | 4 | ✓ |    | 4 |   |    |   |    |
| I | 5 | ✓ | ✓  | 3 | ✓ |    |   |    |
| I | 6 | ✓ | ✓  | 2 |   |    |   |    |
| K | 7 | ✓ |    | 1 |   |    |   |    |

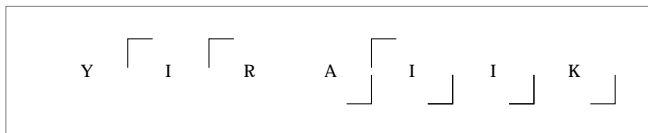

dbValid true YIRAIK PHOS(1) 1. 958. -1.46716 5.13768 100. ? 1752.  
 S\_Acido\_new%gi|68568190|gb|AAY81119.1| YIRAIK%:PHOS::::::%sample\_3%compd\_457

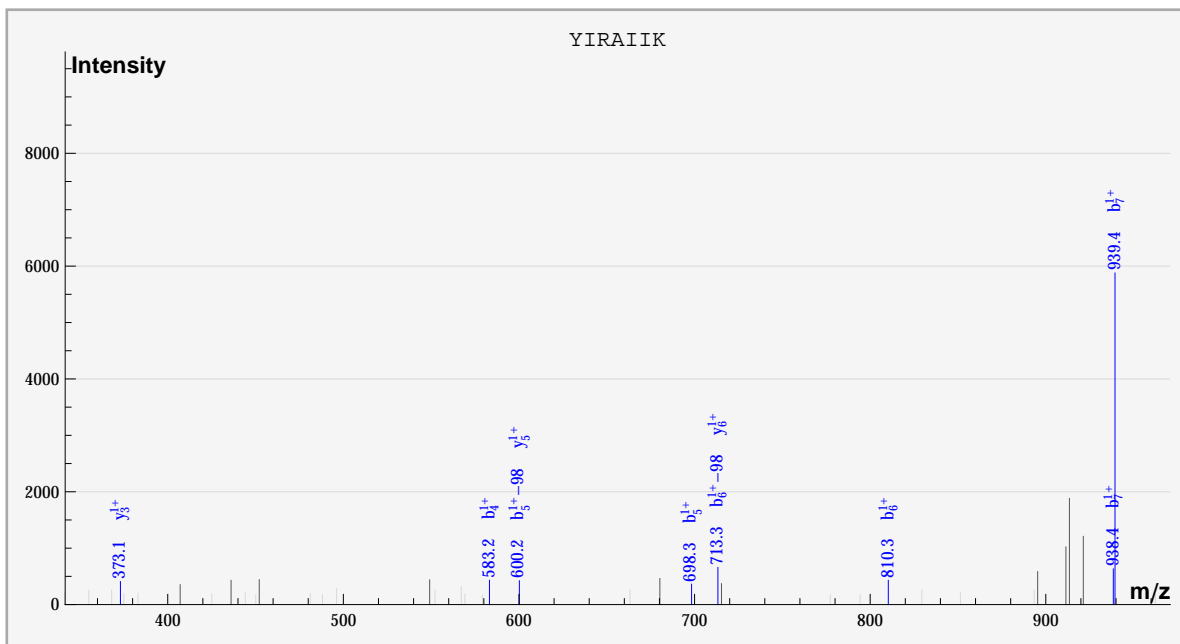

|   | # | b | b* | # | y | y* | P | P* |
|---|---|---|----|---|---|----|---|----|
| Y | 1 |   |    |   |   |    |   |    |
| I | 2 |   |    | 6 | ✓ |    |   |    |
| R | 3 |   |    | 5 | ✓ |    |   |    |
| A | 4 | ✓ |    | 4 |   |    |   |    |
| I | 5 | ✓ | ✓  | 3 | ✓ |    |   |    |
| I | 6 | ✓ | ✓  | 2 |   |    |   |    |
| K | 7 | ✓ |    | 1 |   |    |   |    |

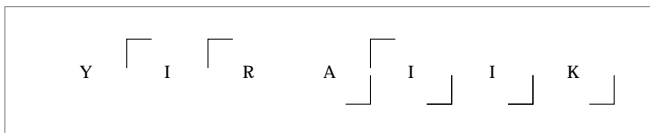

dbValid true MSVIFDR Oxidation\_M(1),PHOS(1) 1. 965. -1.5995 5.21209 100. ? 3558.  
 S\_Acido\_new%gil68567590|gb|AAY80519.1| MSVIFDR%:Oxidation\_M:PHOS:.....%sample\_0%compd\_1939

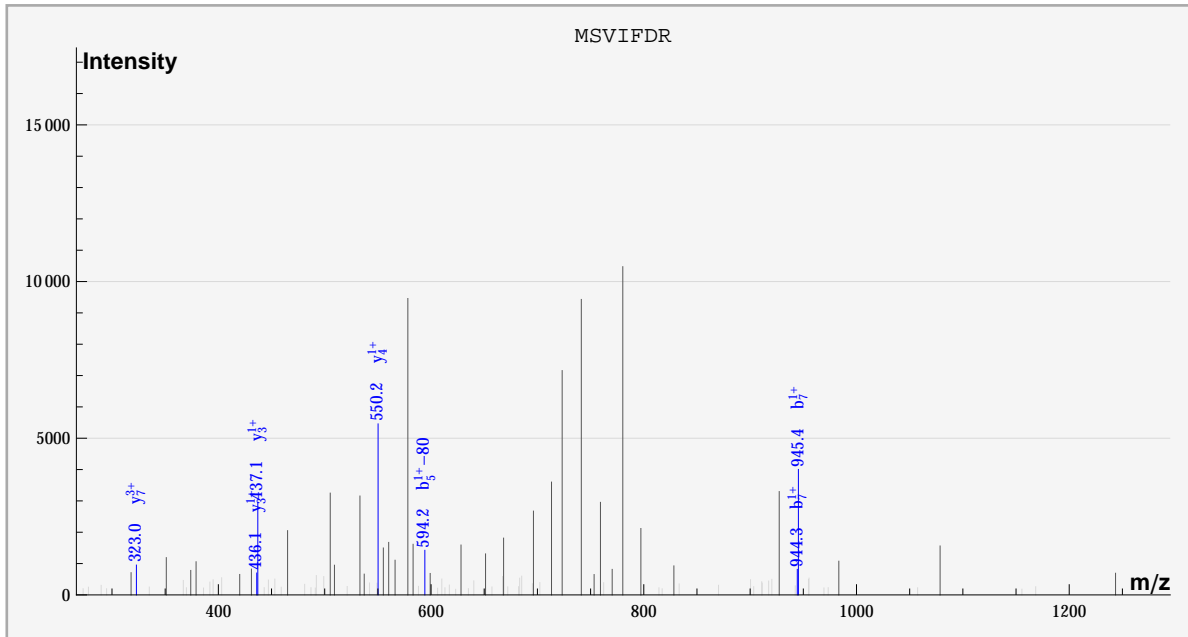

|   | # | b | b* | # | y | y* | P | P* |
|---|---|---|----|---|---|----|---|----|
| M | 1 |   |    |   |   |    |   | ✓  |
| S | 2 |   |    | 6 |   |    |   |    |
| V | 3 |   |    | 5 |   |    |   |    |
| I | 4 |   |    | 4 | ✓ |    |   |    |
| F | 5 | ✓ |    | 3 | ✓ |    |   |    |
| D | 6 |   |    | 2 |   |    |   |    |
| R | 7 | ✓ |    | 1 |   |    |   |    |

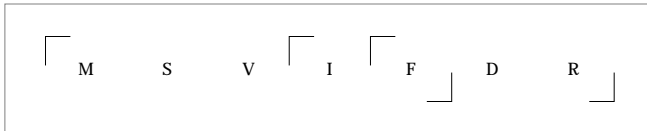



dbValid true DLMRLSR PHOS(1) 1. 972. -1.54605 5.14683 100. ? 2916.  
 S\_Acido\_new%gi68567471|gb|AAY80400.1| DLMRLSR%:::::PHOS::%sample\_1%compd\_1446

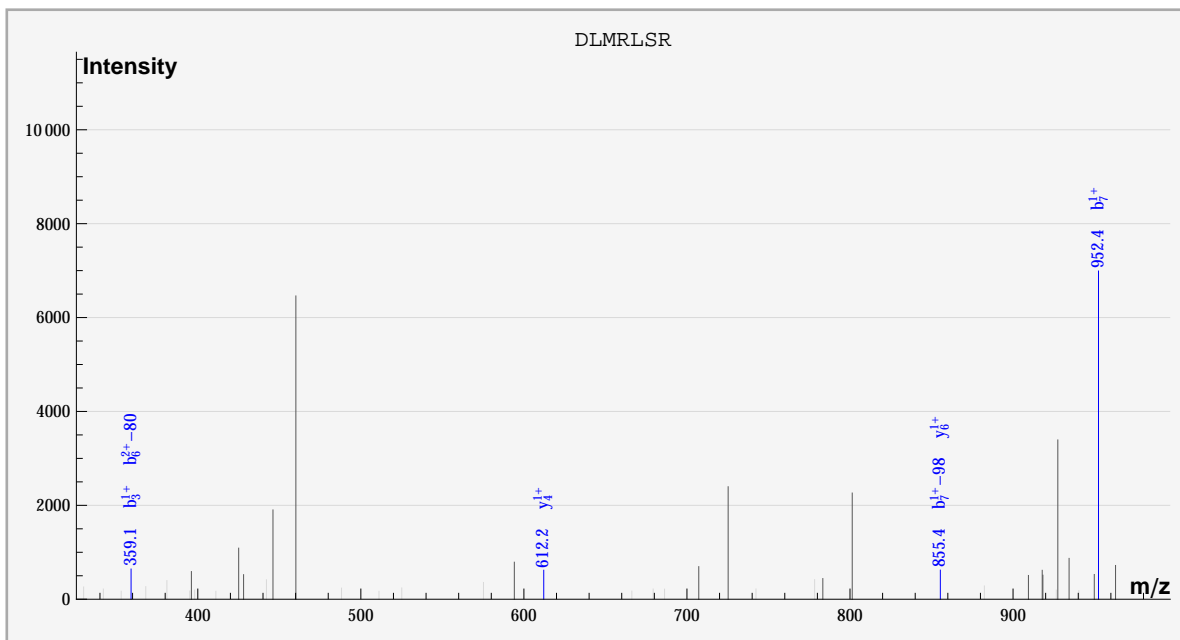

|   | # | b | b* | # | y | y* | P | P* |
|---|---|---|----|---|---|----|---|----|
| D | 1 |   |    |   |   |    |   |    |
| L | 2 |   |    | 6 | ✓ |    |   |    |
| M | 3 | ✓ |    | 5 |   |    |   |    |
| R | 4 |   |    | 4 | ✓ |    |   |    |
| L | 5 |   |    | 3 |   |    |   |    |
| S | 6 |   | ✓  | 2 |   |    |   |    |
| R | 7 | ✓ | ✓  | 1 |   |    |   |    |

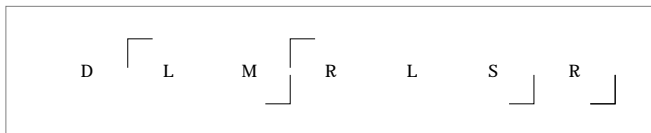

dbValid true DLMRLSR PHOS(1) 1. 972. -1.54605 5.27687 100. ? 2928.  
 S\_Acido\_new%gi68567471|gb|AAY80400.1| DLMRLSR%:::::PHOS::%sample\_1%compd\_1457

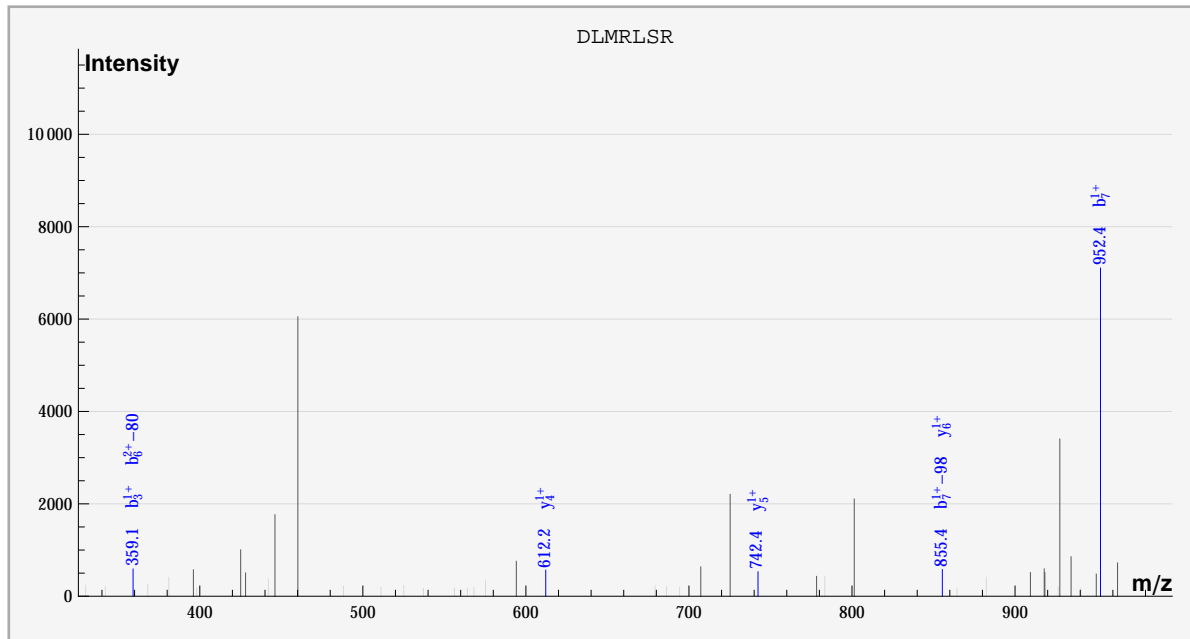

|   | # | b | b* | # | y | y* | P | P* |
|---|---|---|----|---|---|----|---|----|
| D | 1 |   |    |   |   |    |   |    |
| L | 2 |   |    | 6 | ✓ |    |   |    |
| M | 3 | ✓ |    | 5 | ✓ |    |   |    |
| R | 4 |   |    | 4 | ✓ |    |   |    |
| L | 5 |   |    | 3 |   |    |   |    |
| S | 6 |   | ✓  | 2 |   |    |   |    |
| R | 7 | ✓ | ✓  | 1 |   |    |   |    |

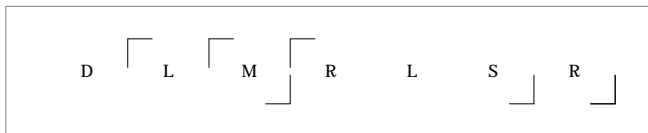

dbValid true DLMRLSR PHOS(1) 1. 972. -1.54605 5.12244 100. ? 2940.  
 S\_Acido\_new%gi|68567471|gb|AAY80400.1| DLMRLSR%:::::PHOS::%sample\_1%compd\_1467

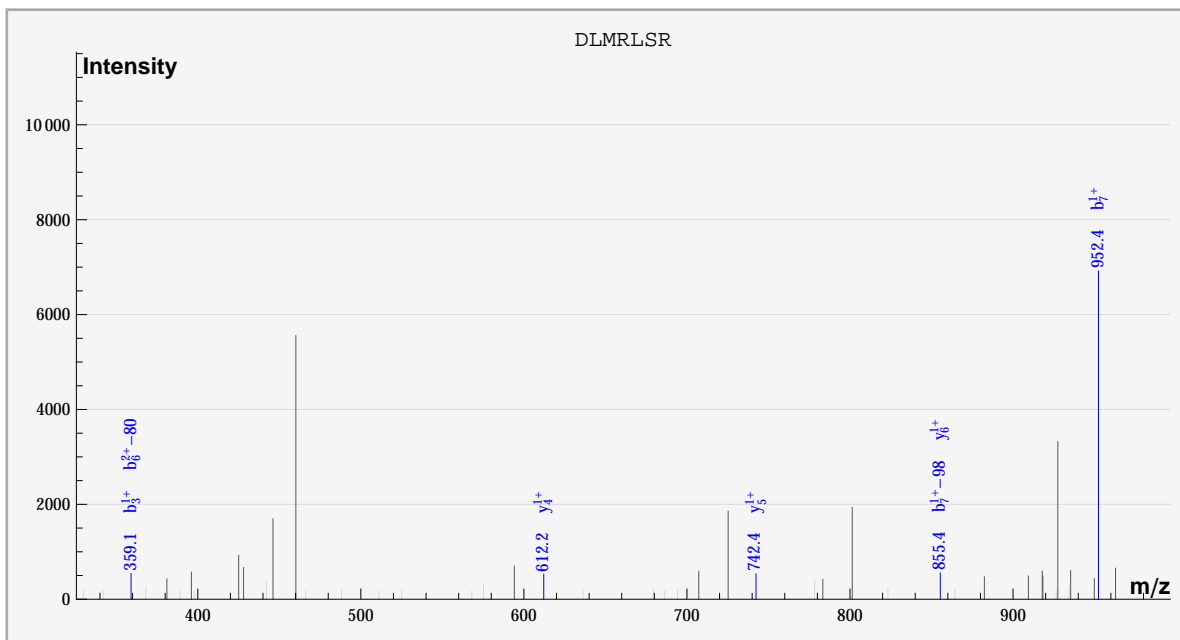

|   | # | b | b* | # | y | y* | P | P* |
|---|---|---|----|---|---|----|---|----|
| D | 1 |   |    |   |   |    |   |    |
| L | 2 |   |    | 6 | ✓ |    |   |    |
| M | 3 | ✓ |    | 5 | ✓ |    |   |    |
| R | 4 |   |    | 4 | ✓ |    |   |    |
| L | 5 |   |    | 3 |   |    |   |    |
| S | 6 |   | ✓  | 2 |   |    |   |    |
| R | 7 | ✓ | ✓  | 1 |   |    |   |    |

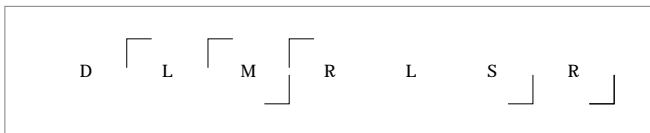

dbValid true NDNLLTYPFTRSGK PHOS(4) 2. 973.25 0.100337 5.30837 100. ? 2286.  
 S\_Acido\_new%gi|68567573|gb|AAV80502.1| NDNLLTYPFTRSGK%:::PHOS:PHOS::PHOS::PHOS::%sample\_1%cmpd\_943

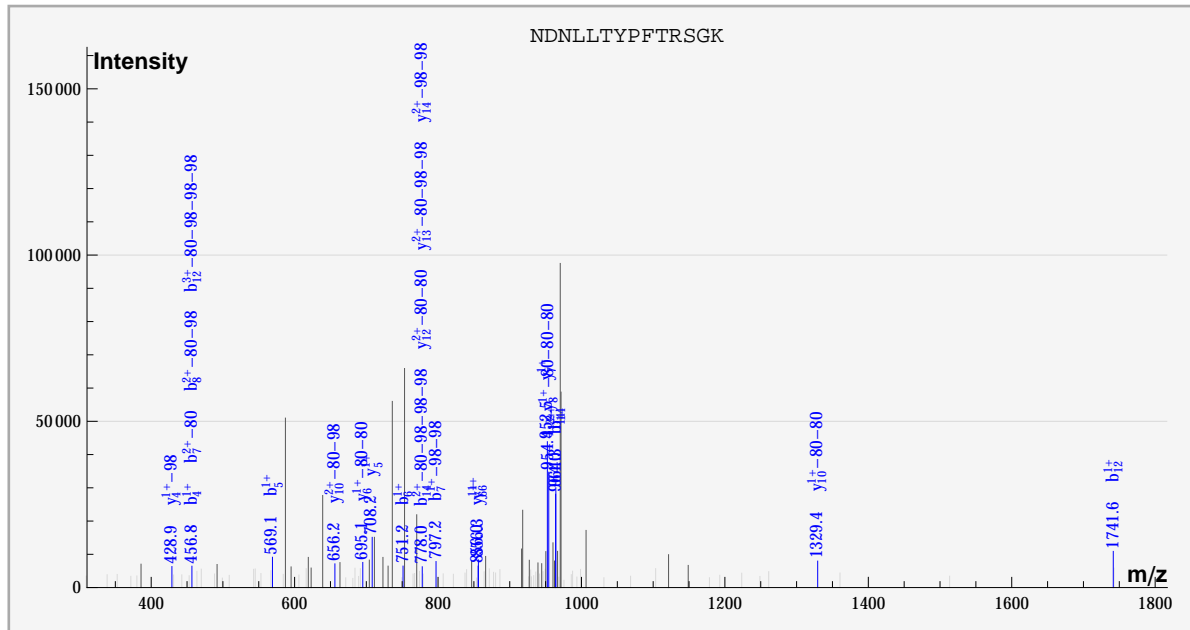

|   | #  | b | b* | #  | y | y* | P | P* |
|---|----|---|----|----|---|----|---|----|
| N | 1  |   |    |    |   |    |   | ✓  |
| D | 2  |   |    | 13 |   | ✓  |   |    |
| N | 3  |   |    | 12 |   | ✓  |   |    |
| L | 4  | ✓ |    | 11 |   |    |   |    |
| L | 5  | ✓ |    | 10 |   | ✓  |   |    |
| T | 6  | ✓ |    | 9  |   |    |   |    |
| Y | 7  |   | ✓  | 8  |   | ✓  |   |    |
| P | 8  |   | ✓  | 7  | ✓ |    |   |    |
| F | 9  |   |    | 6  | ✓ | ✓  |   |    |
| T | 10 |   |    | 5  | ✓ |    |   |    |
| R | 11 |   |    | 4  |   | ✓  |   |    |
| S | 12 | ✓ | ✓  | 3  |   |    |   |    |
| G | 13 |   |    | 2  |   |    |   |    |
| K | 14 | ✓ | ✓  | 1  |   |    |   |    |

[ N ] [ D ] [ N ] [ L ] [ L ] [ T ] [ Y ] [ P ] [ F ] [ T ] [ R ] [ S ] [ G ] [ K ]

dbValid true IGLPVTSK PHOS(2) 1. 976. -1.56413 5.36073 100. ? 1884.  
 S\_Acido\_new%gi|68567099|gb|AAAY80028.1| IGLPVTSK%:::::PHOS:PHOS::%sample\_1%compd\_551

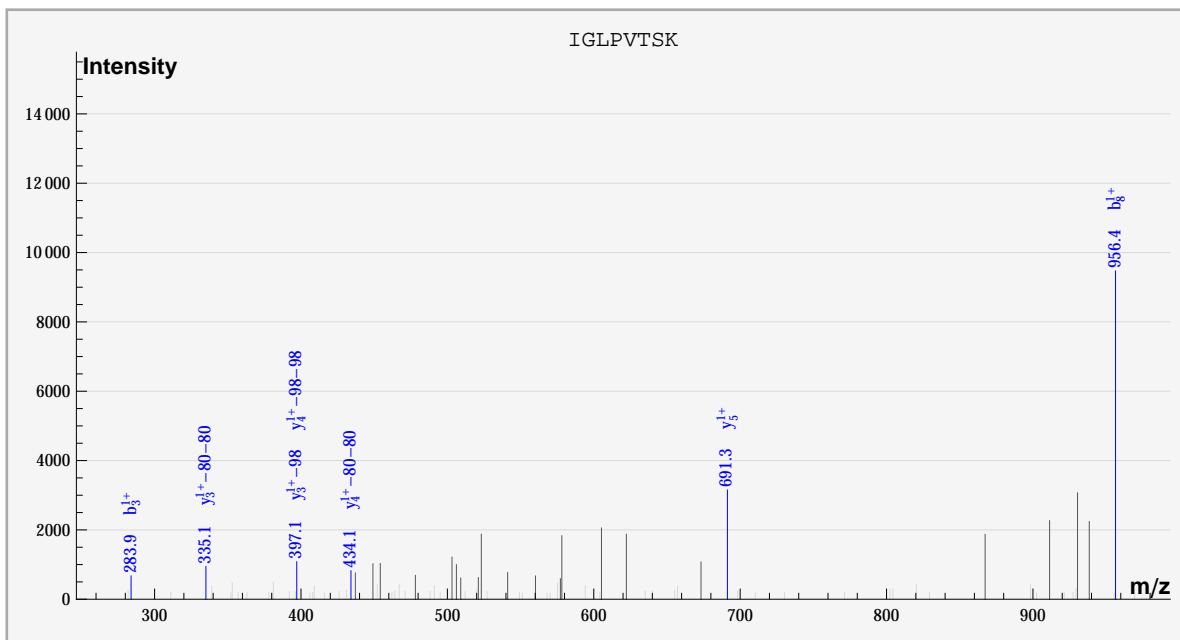

|   | # | b | b* | # | y | y* | P | P* |
|---|---|---|----|---|---|----|---|----|
| I | 1 |   |    |   |   |    |   |    |
| G | 2 |   |    | 7 |   |    |   |    |
| L | 3 | ✓ |    | 6 |   |    |   |    |
| P | 4 |   |    | 5 | ✓ |    |   |    |
| V | 5 |   |    | 4 |   | ✓  |   |    |
| T | 6 |   |    | 3 |   | ✓  |   |    |
| S | 7 |   |    | 2 |   |    |   |    |
| K | 8 | ✓ |    | 1 |   |    |   |    |

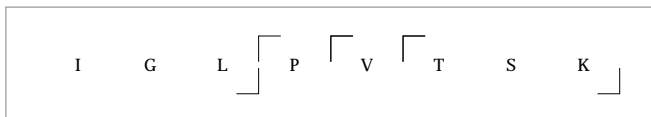

dbValid true IGLPVTSK PHOS(2) 1. 976. -1.56413 5.22894 100. ? 1896.  
 S\_Acido\_new%gi|68567099|gb|AA80028.1| IGLPVTSK%:::::PHOS:PHOS::%sample\_1%compd\_562

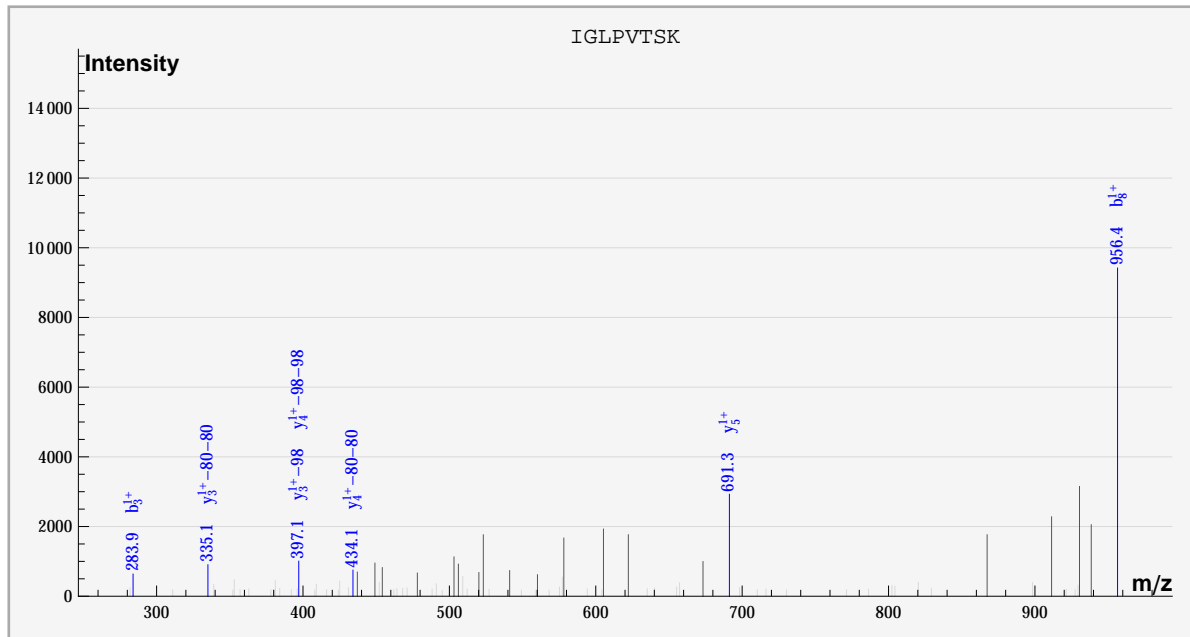

|   | # | b | b* | # | y | y* | P | P* |
|---|---|---|----|---|---|----|---|----|
| I | 1 |   |    |   |   |    |   |    |
| G | 2 |   |    | 7 |   |    |   |    |
| L | 3 | ✓ |    | 6 |   |    |   |    |
| P | 4 |   |    | 5 | ✓ |    |   |    |
| V | 5 |   |    | 4 |   | ✓  |   |    |
| T | 6 |   |    | 3 |   | ✓  |   |    |
| S | 7 |   |    | 2 |   |    |   |    |
| K | 8 | ✓ |    | 1 |   |    |   |    |

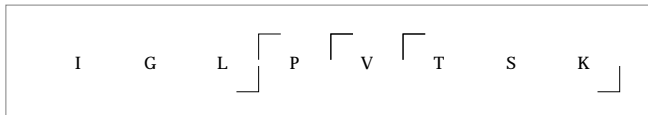

dbValid true IGLPVTSK PHOS(2) 1. 976. -1.56413 5.40946 100. ? 1908.  
 S\_Acido\_new%gi|68567099|gb|AA80028.1| IGLPVTSK%:::::PHOS:PHOS::%sample\_1%compd\_572

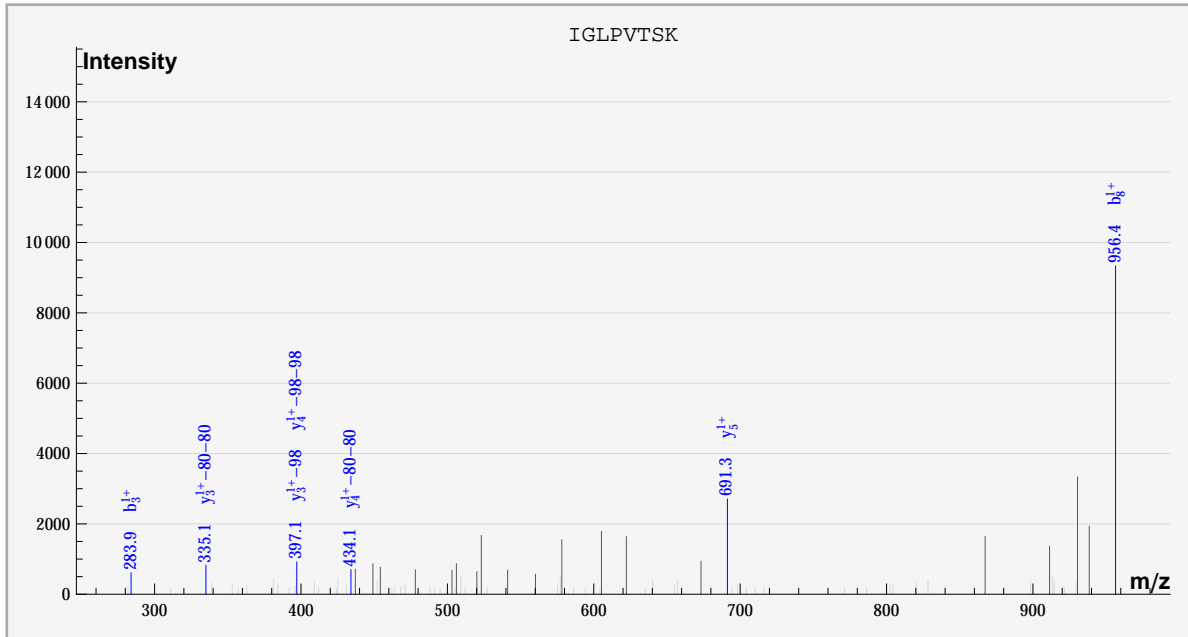

|   | # | b | b* | # | y | y* | P | P* |
|---|---|---|----|---|---|----|---|----|
| I | 1 |   |    |   |   |    |   |    |
| G | 2 |   |    | 7 |   |    |   |    |
| L | 3 | ✓ |    | 6 |   |    |   |    |
| P | 4 |   |    | 5 | ✓ |    |   |    |
| V | 5 |   |    | 4 |   | ✓  |   |    |
| T | 6 |   |    | 3 |   | ✓  |   |    |
| S | 7 |   |    | 2 |   |    |   |    |
| K | 8 | ✓ |    | 1 |   |    |   |    |

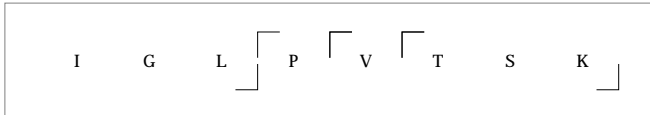

dbValid true IGLPVTSK PHOS(2) 1. 976. -1.56413 5.21024 100. ? 1944.  
 S\_Acido\_new%gi|68567099|gb|AA80028.1| IGLPVTSK%:::::PHOS:PHOS::%sample\_1%cmpd\_603

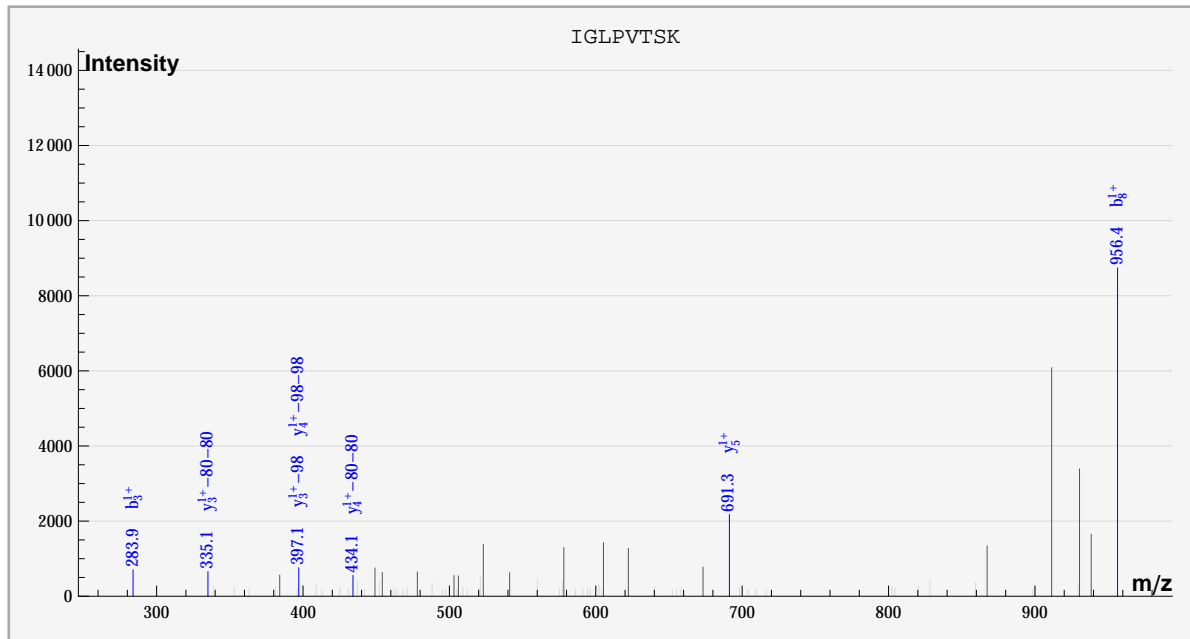

|   | # | b | b* | # | y | y* | P | P* |
|---|---|---|----|---|---|----|---|----|
| I | 1 |   |    |   |   |    |   |    |
| G | 2 |   |    | 7 |   |    |   |    |
| L | 3 | ✓ |    | 6 |   |    |   |    |
| P | 4 |   |    | 5 | ✓ |    |   |    |
| V | 5 |   |    | 4 |   | ✓  |   |    |
| T | 6 |   |    | 3 |   | ✓  |   |    |
| S | 7 |   |    | 2 |   |    |   |    |
| K | 8 | ✓ |    | 1 |   |    |   |    |

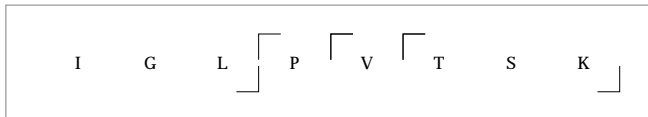



dbValid true MRVITFK PHOS(1) 1. 976. -1.51073 5.27394 100. ? 2784.

S\_Acido\_new%gi68567795|gb|AAY80724.1| MRVITFK%:::::PHOS:::sample\_1%compd\_1334

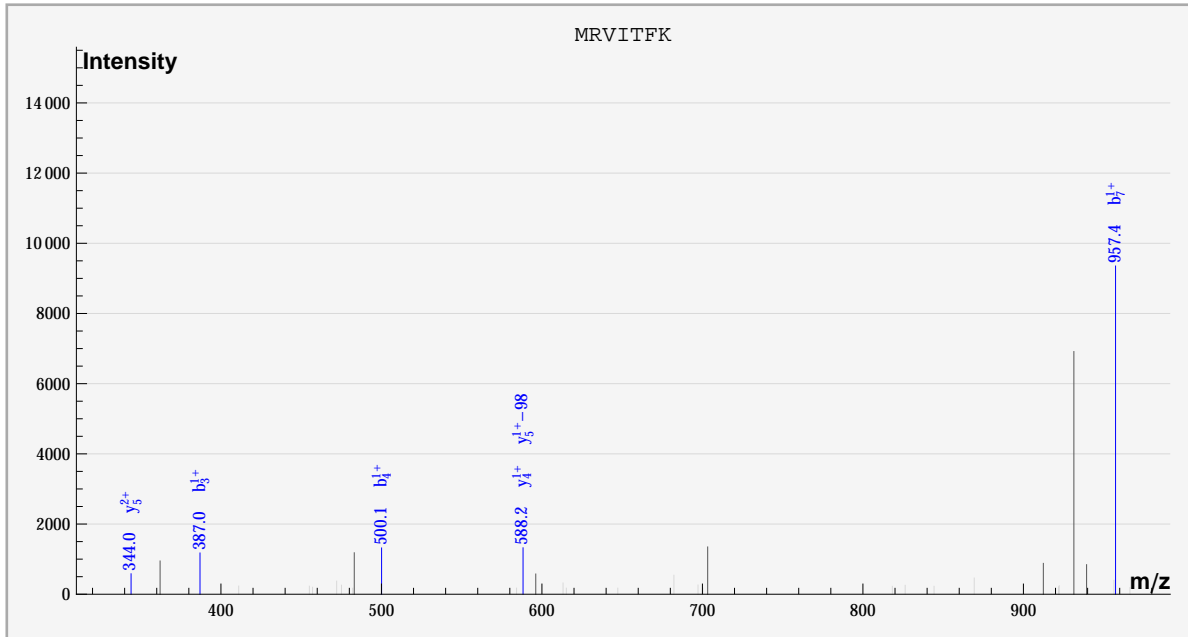

|   | # | b | b* | # | y | y* | P | P* |
|---|---|---|----|---|---|----|---|----|
| M | 1 |   |    |   |   |    |   |    |
| R | 2 |   |    | 6 |   |    |   |    |
| V | 3 | ✓ |    | 5 | ✓ | ✓  |   |    |
| I | 4 | ✓ |    | 4 | ✓ |    |   |    |
| T | 5 |   |    | 3 |   |    |   |    |
| F | 6 |   |    | 2 |   |    |   |    |
| K | 7 | ✓ |    | 1 |   |    |   |    |

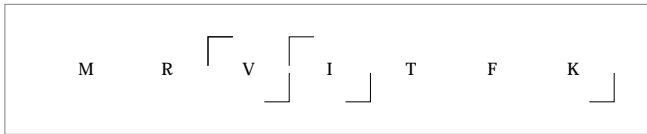

dbValid true MRVITFK PHOS(1) 1. 976. -1.51073 5.17217 100. ? 2796.

S\_Acido\_new%gi|68567795|gb|AAY80724.1| MRVITFK%:::::PHOS:::sample\_1%compd\_1345

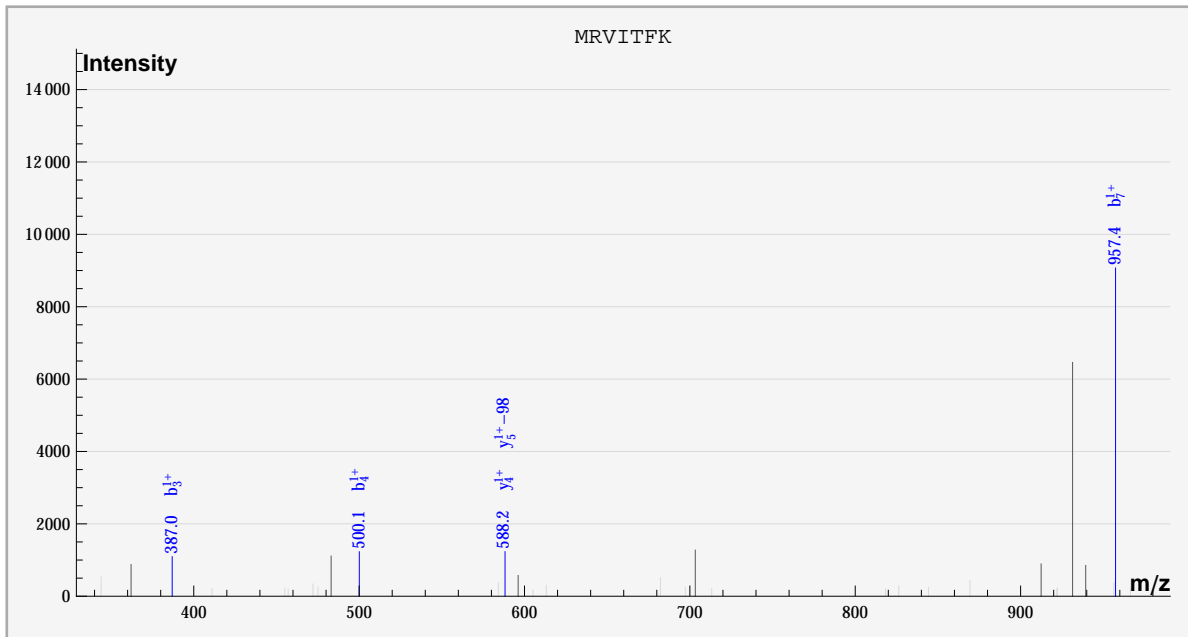

|   | # | b | b* | # | y | y* | P | P* |
|---|---|---|----|---|---|----|---|----|
| M | 1 |   |    |   |   |    |   |    |
| R | 2 |   |    | 6 |   |    |   |    |
| V | 3 | ✓ |    | 5 |   | ✓  |   |    |
| I | 4 | ✓ |    | 4 | ✓ |    |   |    |
| T | 5 |   |    | 3 |   |    |   |    |
| F | 6 |   |    | 2 |   |    |   |    |
| K | 7 | ✓ |    | 1 |   |    |   |    |

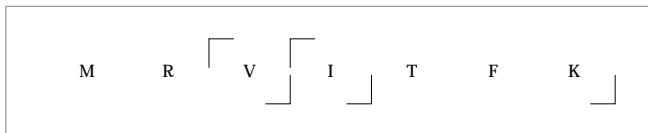

dbValid true MRVITFK PHOS(1) 1. 976. -1.51073 5.21142 100. ? 2808.

S\_Acido\_new%gi|68567795|gb|AAY80724.1| MRVITFK%:::::PHOS:::sample\_1%compd\_1356

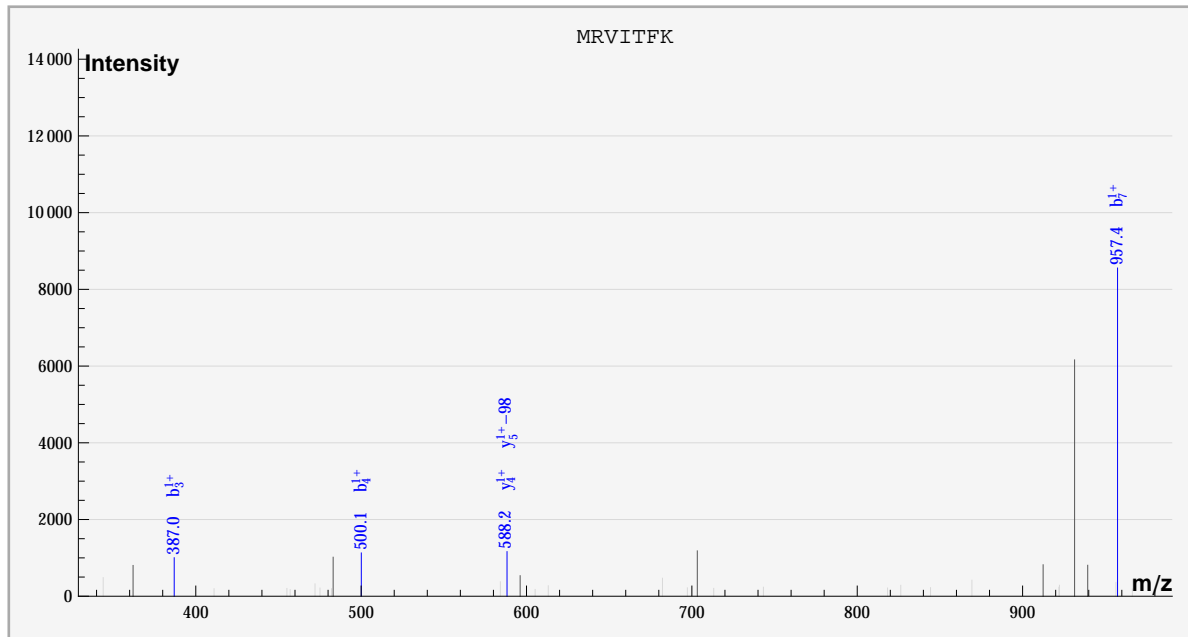

|   | # | b | b* | # | y | y* | P | P* |
|---|---|---|----|---|---|----|---|----|
| M | 1 |   |    |   |   |    |   |    |
| R | 2 |   |    | 6 |   |    |   |    |
| V | 3 | ✓ |    | 5 |   | ✓  |   |    |
| I | 4 | ✓ |    | 4 | ✓ |    |   |    |
| T | 5 |   |    | 3 |   |    |   |    |
| F | 6 |   |    | 2 |   |    |   |    |
| K | 7 | ✓ |    | 1 |   |    |   |    |

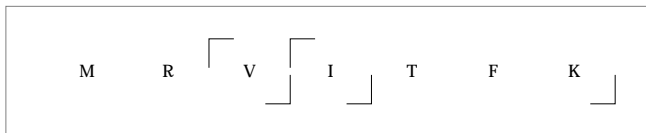

dbValid true MRVITFK PHOS(1) 1. 976. -1.51073 5.37304 100. ? 2820.

S\_Acido\_new%gi|68567795|gb|AAY80724.1| MRVITFK%:::::PHOS:::%sample\_1%compd\_1366

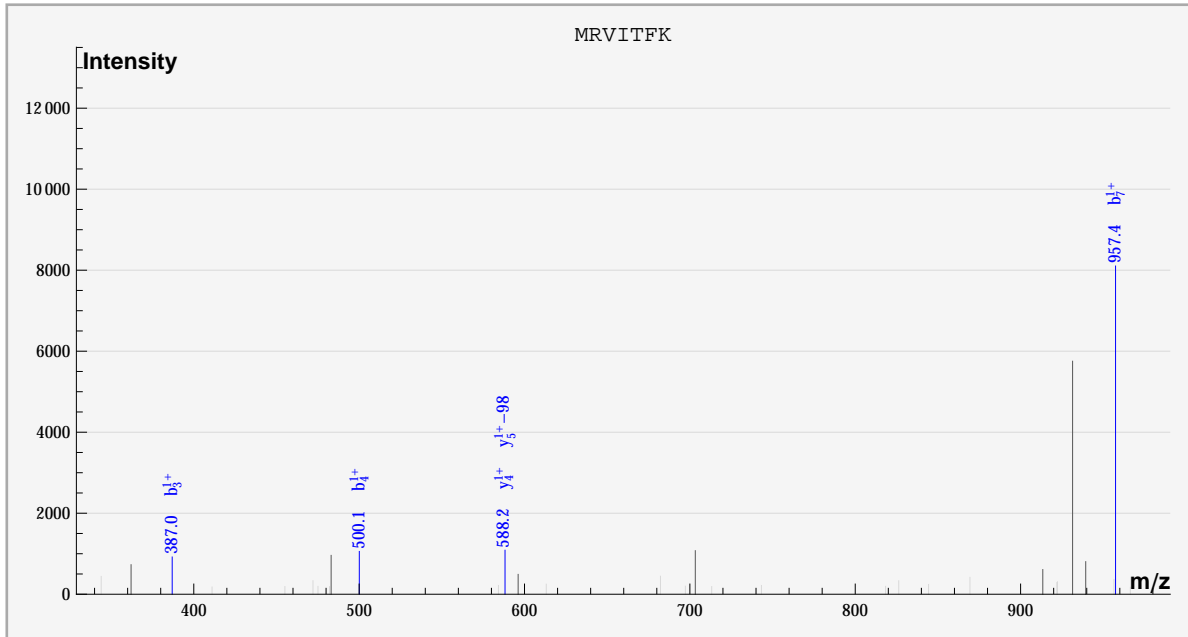

|   | # | b | b* | # | y | y* | P | P* |
|---|---|---|----|---|---|----|---|----|
| M | 1 |   |    |   |   |    |   |    |
| R | 2 |   |    | 6 |   |    |   |    |
| V | 3 | ✓ |    | 5 |   | ✓  |   |    |
| I | 4 | ✓ |    | 4 | ✓ |    |   |    |
| T | 5 |   |    | 3 |   |    |   |    |
| F | 6 |   |    | 2 |   |    |   |    |
| K | 7 | ✓ |    | 1 |   |    |   |    |

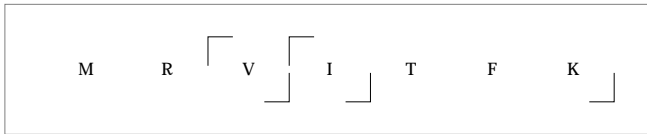

dbValid true MRVITFK PHOS(1) 1. 976. -1.51073 5.37831 100. ? 2832.

S\_Acido\_new%gi|68567795|gb|AAY80724.1| MRVITFK%:::::PHOS:::%sample\_1%compd\_1376

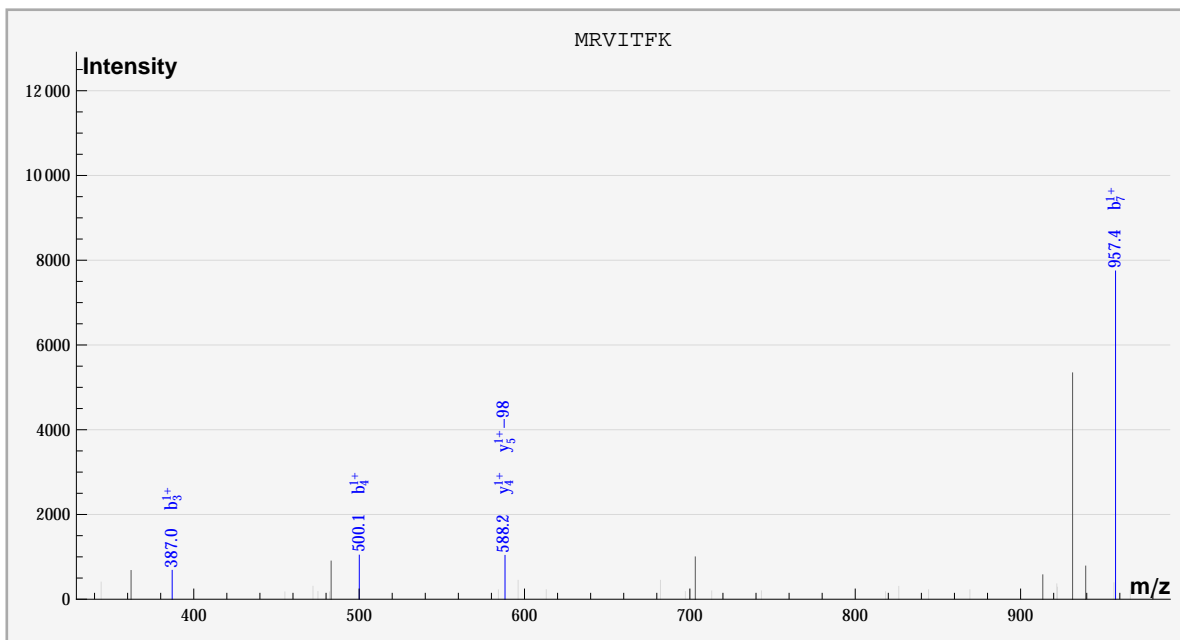

|   | # | b | b* | # | y | y* | P | P* |
|---|---|---|----|---|---|----|---|----|
| M | 1 |   |    |   |   |    |   |    |
| R | 2 |   |    | 6 |   |    |   |    |
| V | 3 | ✓ |    | 5 |   | ✓  |   |    |
| I | 4 | ✓ |    | 4 | ✓ |    |   |    |
| T | 5 |   |    | 3 |   |    |   |    |
| F | 6 |   |    | 2 |   |    |   |    |
| K | 7 | ✓ |    | 1 |   |    |   |    |

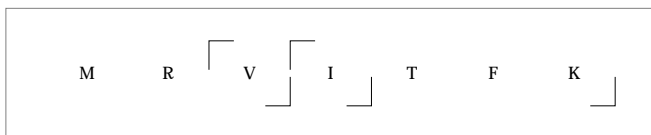

dbValid true MRVITFK PHOS(1) 1. 976. -1.51073 5.47112 100. ? 2850.

S\_Acido\_new%gi|68567795|gb|AAY80724.1| MRVITFK%:::::PHOS:::%sample\_1%compd\_1386

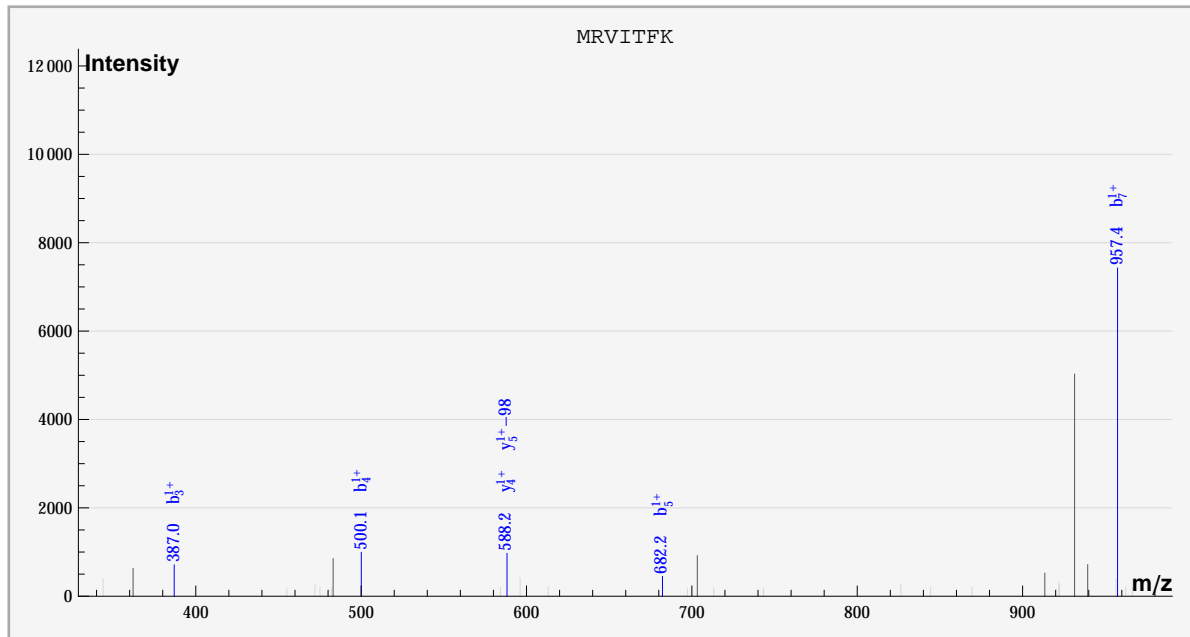

|   | # | b | b* | # | y | y* | P | P* |
|---|---|---|----|---|---|----|---|----|
| M | 1 |   |    |   |   |    |   |    |
| R | 2 |   |    | 6 |   |    |   |    |
| V | 3 | ✓ |    | 5 |   | ✓  |   |    |
| I | 4 | ✓ |    | 4 | ✓ |    |   |    |
| T | 5 | ✓ |    | 3 |   |    |   |    |
| F | 6 |   |    | 2 |   |    |   |    |
| K | 7 | ✓ |    | 1 |   |    |   |    |

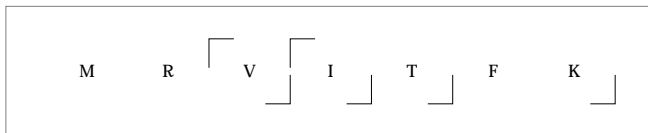

dbValid true MRVITFK PHOS(1) 1. 976. -1.51073 5.94753 100. ? 2874.

S\_Acido\_new%gi|68567795|gb|AAY80724.1| MRVITFK%:::::PHOS:::sample\_1%compd\_1407

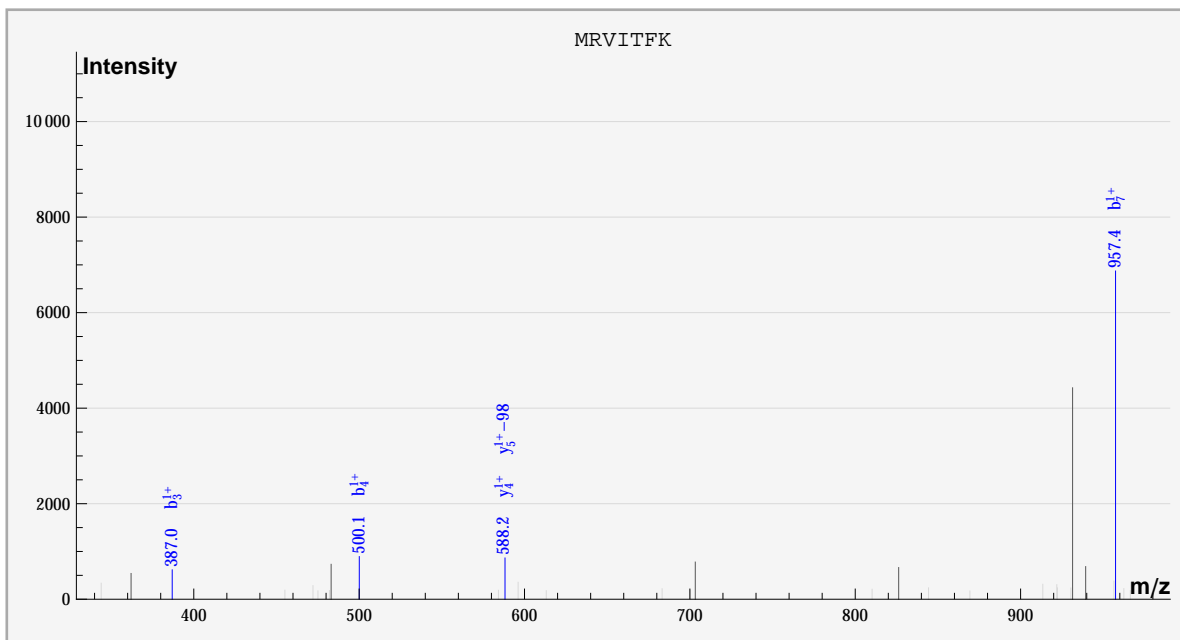

|   | # | b | b* | # | y | y* | P | P* |
|---|---|---|----|---|---|----|---|----|
| M | 1 |   |    |   |   |    |   |    |
| R | 2 |   |    | 6 |   |    |   |    |
| V | 3 | ✓ |    | 5 |   | ✓  |   |    |
| I | 4 | ✓ |    | 4 | ✓ |    |   |    |
| T | 5 |   |    | 3 |   |    |   |    |
| F | 6 |   |    | 2 |   |    |   |    |
| K | 7 | ✓ |    | 1 |   |    |   |    |



dbValid true LELWLYDLESKKEK PHOS(2) 2. 978. -0.545883 5.23634 100. ? 3174.  
 S\_Acido\_new%gi|68568658|gb|AA81587.1| LELWLYDLESKKEK%:::PHOS:::PHOS:::sample\_1%compd\_1673

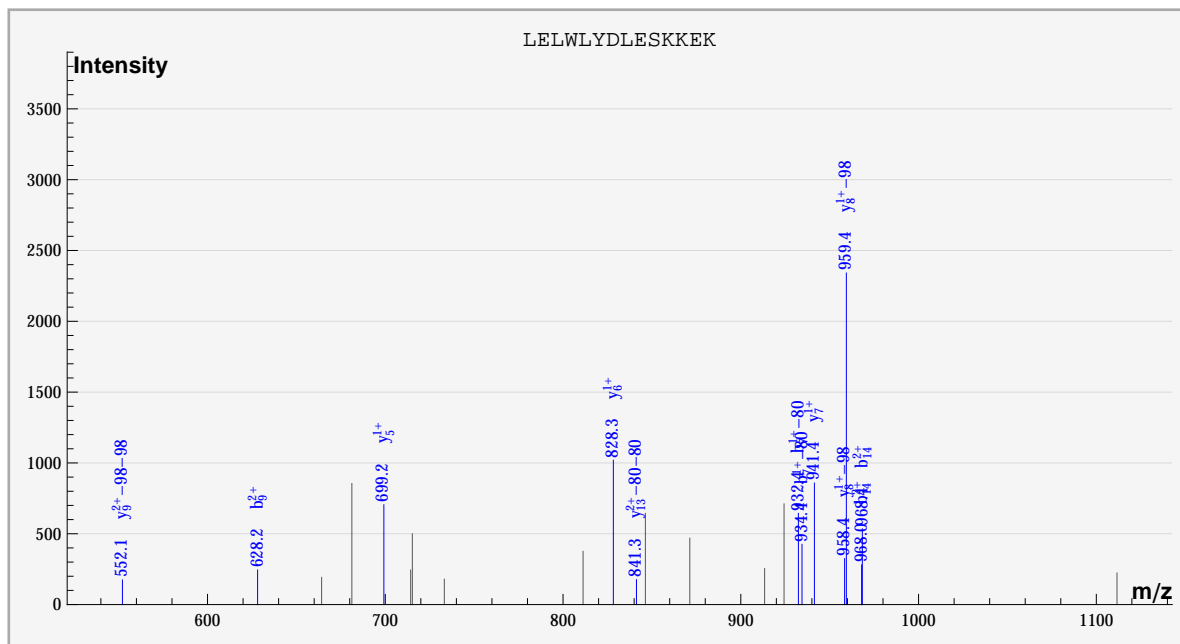

|   | #  | b | b* | #  | y | y* | P | P* |
|---|----|---|----|----|---|----|---|----|
| L | 1  |   |    |    |   |    |   |    |
| E | 2  |   |    | 13 |   | ✓  |   |    |
| L | 3  |   |    | 12 |   |    |   |    |
| W | 4  |   |    | 11 |   |    |   |    |
| L | 5  |   |    | 10 |   |    |   |    |
| Y | 6  |   |    | 9  |   | ✓  |   |    |
| D | 7  | ✓ |    | 8  |   | ✓  |   |    |
| L | 8  |   |    | 7  | ✓ |    |   |    |
| E | 9  | ✓ |    | 6  | ✓ |    |   |    |
| S | 10 |   |    | 5  | ✓ |    |   |    |
| K | 11 |   |    | 4  |   |    |   |    |
| K | 12 |   |    | 3  |   |    |   |    |
| E | 13 |   |    | 2  |   |    |   |    |
| K | 14 | ✓ |    | 1  |   |    |   |    |

L [ E L W L [ Y [ D ] [ L [ E ] ] S K K E K ]



dbValid true LELWLYDLESKKEK PHOS(2) 2. 978. -0.545883 5.25301 100. ? 3186.

S\_Acido\_new%gi|68568658|gb|AAY81587.1| LELWLYDLESKKEK%:::PHOS:::PHOS:::sample\_1%compd\_1683

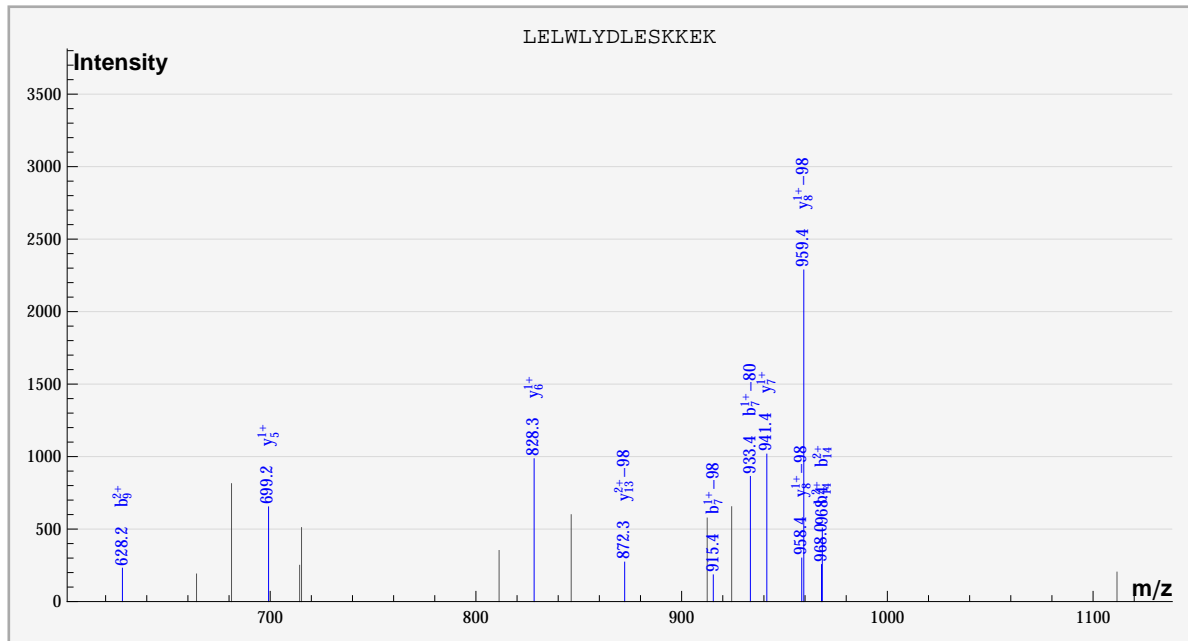

|   | #  | b | b* | #  | y | y* | P | P* |
|---|----|---|----|----|---|----|---|----|
| L | 1  |   |    |    |   |    |   |    |
| E | 2  |   |    | 13 |   | ✓  |   |    |
| L | 3  |   |    | 12 |   |    |   |    |
| W | 4  |   |    | 11 |   |    |   |    |
| L | 5  |   |    | 10 |   |    |   |    |
| Y | 6  |   |    | 9  |   |    |   |    |
| D | 7  |   | ✓  | 8  |   | ✓  |   |    |
| L | 8  |   |    | 7  |   | ✓  |   |    |
| E | 9  | ✓ |    | 6  |   | ✓  |   |    |
| S | 10 |   |    | 5  |   | ✓  |   |    |
| K | 11 |   |    | 4  |   |    |   |    |
| K | 12 |   |    | 3  |   |    |   |    |
| E | 13 |   |    | 2  |   |    |   |    |
| K | 14 | ✓ |    | 1  |   |    |   |    |

L [ E L W L Y [ D ] [ L [ E ] S K K E K ]

dbValid true LELWLYDLESKKEK PHOS(2) 2. 978. -0.545883 5.19969 100. ? 3198.  
 S\_Acido\_new%gi|68568658|gb|AAY81587.1| LELWLYDLESKKEK%:::::PHOS::::PHOS:::::sample\_1%compd\_1693

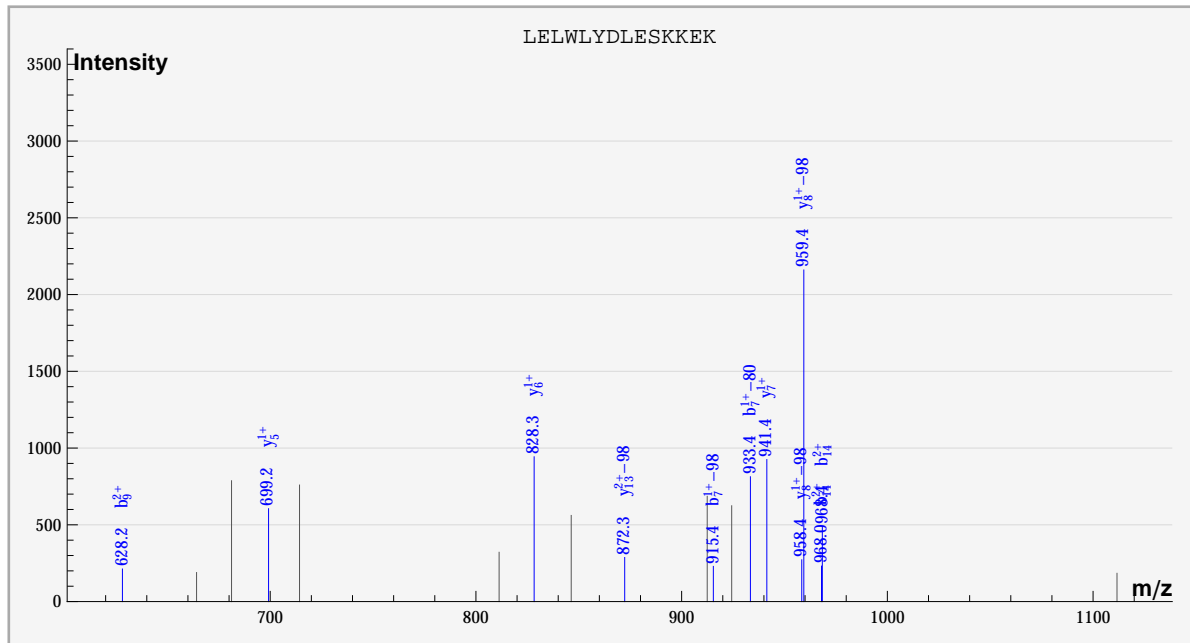

|   | #  | b | b* | #  | y | y* | P | P* |
|---|----|---|----|----|---|----|---|----|
| L | 1  |   |    |    |   |    |   |    |
| E | 2  |   |    | 13 |   | ✓  |   |    |
| L | 3  |   |    | 12 |   |    |   |    |
| W | 4  |   |    | 11 |   |    |   |    |
| L | 5  |   |    | 10 |   |    |   |    |
| Y | 6  |   |    | 9  |   |    |   |    |
| D | 7  |   | ✓  | 8  |   | ✓  |   |    |
| L | 8  |   |    | 7  | ✓ |    |   |    |
| E | 9  | ✓ |    | 6  | ✓ |    |   |    |
| S | 10 |   |    | 5  | ✓ |    |   |    |
| K | 11 |   |    | 4  |   |    |   |    |
| K | 12 |   |    | 3  |   |    |   |    |
| E | 13 |   |    | 2  |   |    |   |    |
| K | 14 | ✓ |    | 1  |   |    |   |    |

L [ E L W L Y [ D ] [ L [ E ] S K K E K ]

dbValid true LELWLYDLESKKEK PHOS(2) 2. 978. -0.545883 5.25342 100. ? 3210.

S\_Acido\_new%gi|68568658|gb|AAY81587.1| LELWLYDLESKKEK%:::::PHOS:::::PHOS:::::%sample\_1%compd\_1703

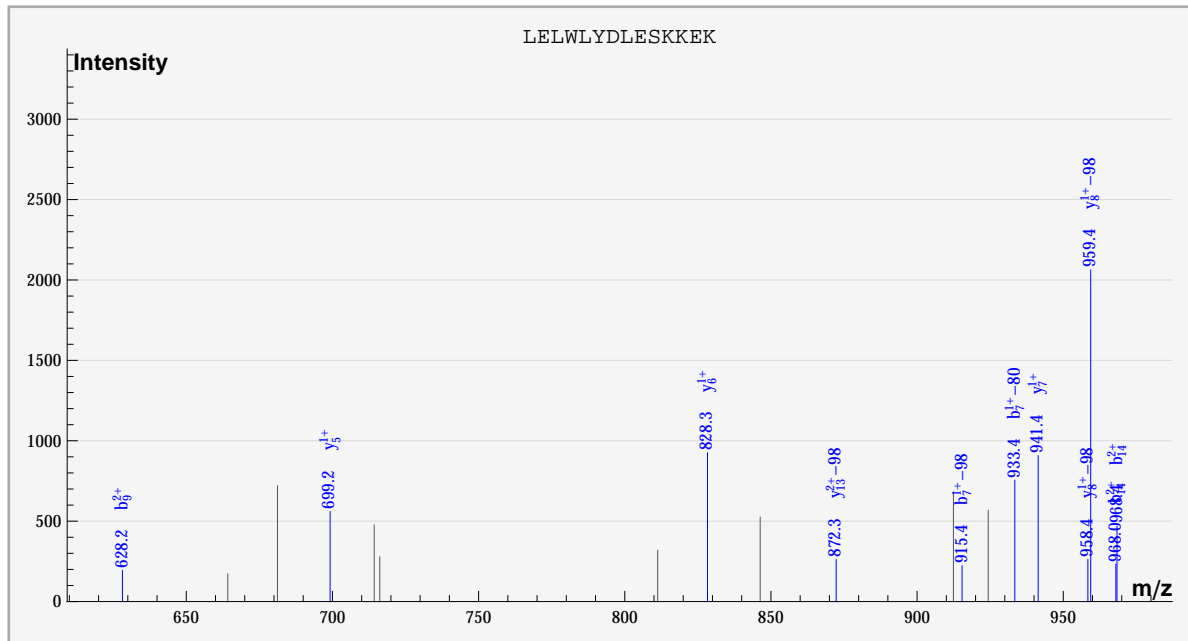

|   | #  | b | b* | #  | y | y* | P | P* |
|---|----|---|----|----|---|----|---|----|
| L | 1  |   |    |    |   |    |   |    |
| E | 2  |   |    | 13 |   | ✓  |   |    |
| L | 3  |   |    | 12 |   |    |   |    |
| W | 4  |   |    | 11 |   |    |   |    |
| L | 5  |   |    | 10 |   |    |   |    |
| Y | 6  |   |    | 9  |   |    |   |    |
| D | 7  |   | ✓  | 8  |   | ✓  |   |    |
| L | 8  |   |    | 7  |   | ✓  |   |    |
| E | 9  | ✓ |    | 6  |   | ✓  |   |    |
| S | 10 |   |    | 5  |   | ✓  |   |    |
| K | 11 |   |    | 4  |   |    |   |    |
| K | 12 |   |    | 3  |   |    |   |    |
| E | 13 |   |    | 2  |   |    |   |    |
| K | 14 | ✓ |    | 1  |   |    |   |    |

L [ E L W L Y [ D ] [ L [ E ] S K K E K ]

dbValid true LELWLYDLESKKEK PHOS(2) 2. 978. -0.545883 5.21647 100. ? 3222.  
 S\_Acido\_new%gi|68568658|gb|AAY81587.1| LELWLYDLESKKEK%:::::PHOS:::::PHOS:::::%sample\_1%compd\_1714

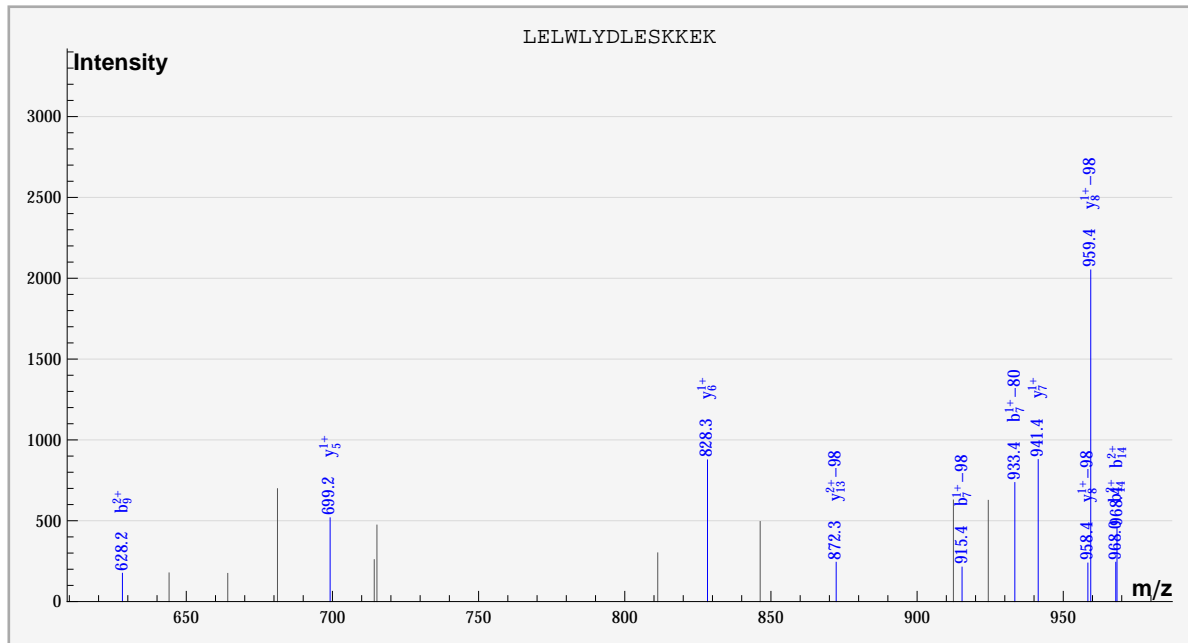

|   | #  | b | b* | #  | y | y* | P | P* |
|---|----|---|----|----|---|----|---|----|
| L | 1  |   |    |    |   |    |   |    |
| E | 2  |   |    | 13 |   | ✓  |   |    |
| L | 3  |   |    | 12 |   |    |   |    |
| W | 4  |   |    | 11 |   |    |   |    |
| L | 5  |   |    | 10 |   |    |   |    |
| Y | 6  |   |    | 9  |   |    |   |    |
| D | 7  |   | ✓  | 8  |   | ✓  |   |    |
| L | 8  |   |    | 7  |   | ✓  |   |    |
| E | 9  | ✓ |    | 6  |   | ✓  |   |    |
| S | 10 |   |    | 5  |   | ✓  |   |    |
| K | 11 |   |    | 4  |   |    |   |    |
| K | 12 |   |    | 3  |   |    |   |    |
| E | 13 |   |    | 2  |   |    |   |    |
| K | 14 | ✓ |    | 1  |   |    |   |    |

L [ E L W L Y [ D ] [ L [ E ] S K K E K ]

dbValid true LELWLYDLESKKEK PHOS(2) 2. 978. -0.545883 5.19393 100. ? 3234.

S\_Acido\_new%gi|68568658|gb|AA81587.1| LELWLYDLESKKEK%:::PHOS:::PHOS:::sample\_1%compd\_1724

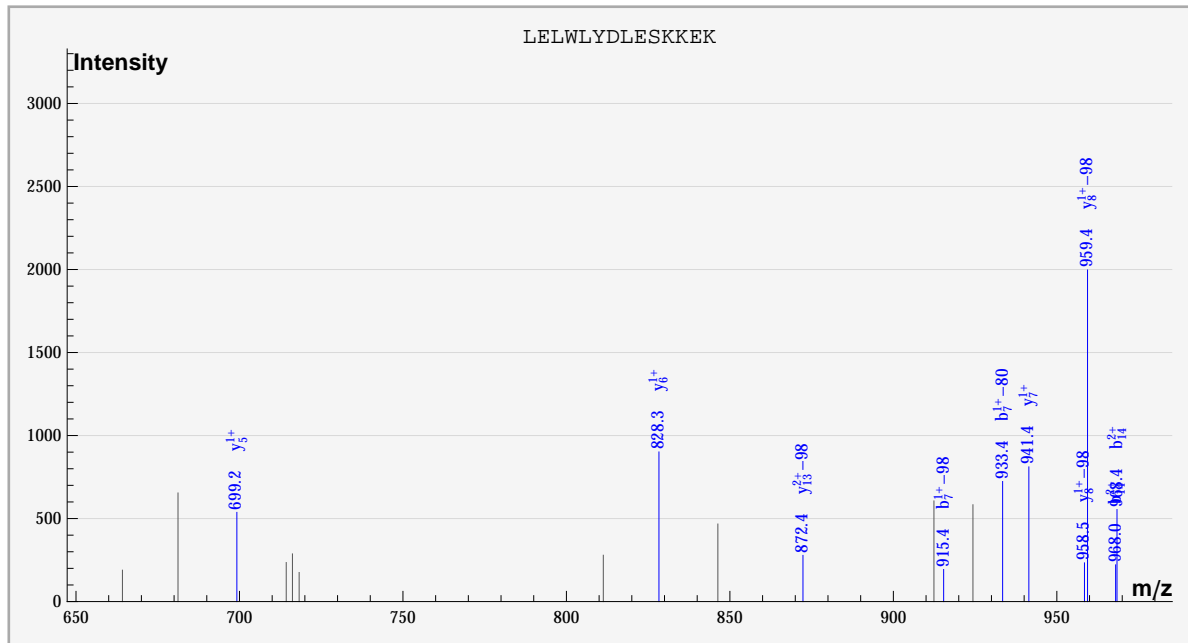

|   | #  | b | b* | #  | y | y* | P | P* |
|---|----|---|----|----|---|----|---|----|
| L | 1  |   |    |    |   |    |   |    |
| E | 2  |   |    | 13 |   | ✓  |   |    |
| L | 3  |   |    | 12 |   |    |   |    |
| W | 4  |   |    | 11 |   |    |   |    |
| L | 5  |   |    | 10 |   |    |   |    |
| Y | 6  |   |    | 9  |   |    |   |    |
| D | 7  | ✓ |    | 8  |   | ✓  |   |    |
| L | 8  |   |    | 7  | ✓ |    |   |    |
| E | 9  |   |    | 6  | ✓ |    |   |    |
| S | 10 |   |    | 5  | ✓ |    |   |    |
| K | 11 |   |    | 4  |   |    |   |    |
| K | 12 |   |    | 3  |   |    |   |    |
| E | 13 |   |    | 2  |   |    |   |    |
| K | 14 | ✓ |    | 1  |   |    |   |    |

L [ E L W L Y [ D ] [ L [ E [ S K K E K ] ] ]

dbValid true LELWLYDLESKKEK PHOS(2) 2. 978. -0.545883 5.15387 100. ? 3258.  
 S\_Acido\_new%gi|68568658|gb|AAY81587.1| LELWLYDLESKKEK%:::::PHOS:::::PHOS:::::%sample\_1%compd\_1745

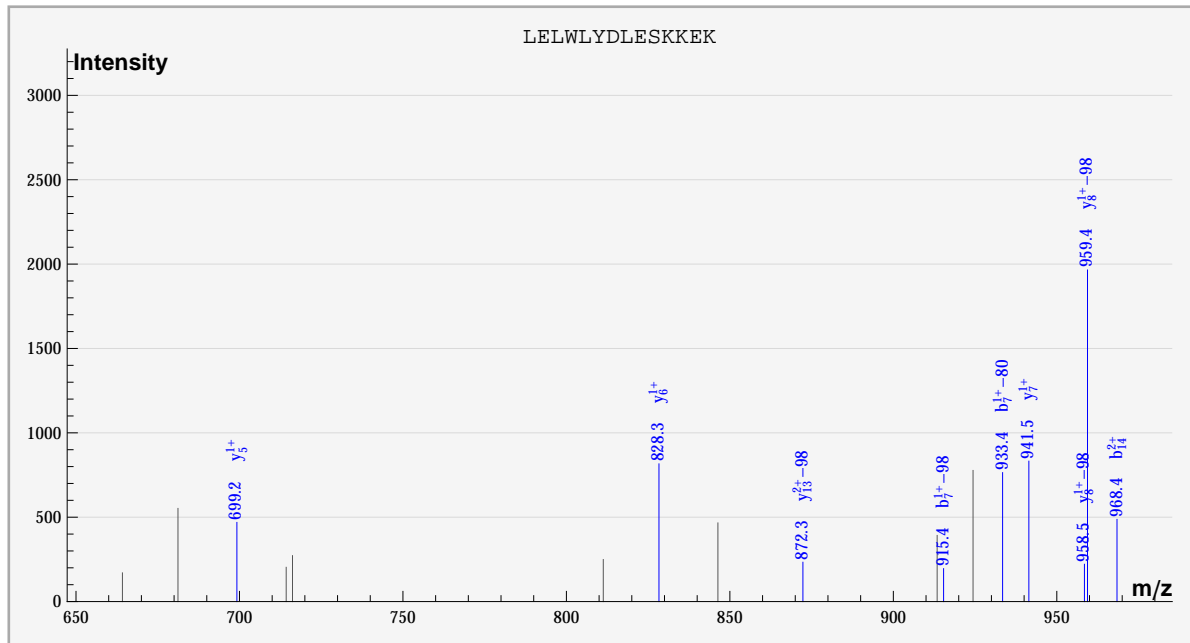

|   | #  | b | b* | #  | y | y* | P | P* |
|---|----|---|----|----|---|----|---|----|
| L | 1  |   |    |    |   |    |   |    |
| E | 2  |   |    | 13 |   | ✓  |   |    |
| L | 3  |   |    | 12 |   |    |   |    |
| W | 4  |   |    | 11 |   |    |   |    |
| L | 5  |   |    | 10 |   |    |   |    |
| Y | 6  |   |    | 9  |   |    |   |    |
| D | 7  | ✓ |    | 8  |   | ✓  |   |    |
| L | 8  |   |    | 7  | ✓ |    |   |    |
| E | 9  |   |    | 6  | ✓ |    |   |    |
| S | 10 |   |    | 5  | ✓ |    |   |    |
| K | 11 |   |    | 4  |   |    |   |    |
| K | 12 |   |    | 3  |   |    |   |    |
| E | 13 |   |    | 2  |   |    |   |    |
| K | 14 | ✓ |    | 1  |   |    |   |    |

L [ E L W L Y [ D ] [ L [ E [ S K K E K ] ] ]

dbValid true LELWLYDLESKKEK PHOS(2) 2. 978. -0.545883 5.18135 100. ? 3270.  
 S\_Acido\_new%gi|68568658|gb|AAY81587.1| LELWLYDLESKKEK%:::::PHOS::::PHOS:::::sample\_1%compd\_1756

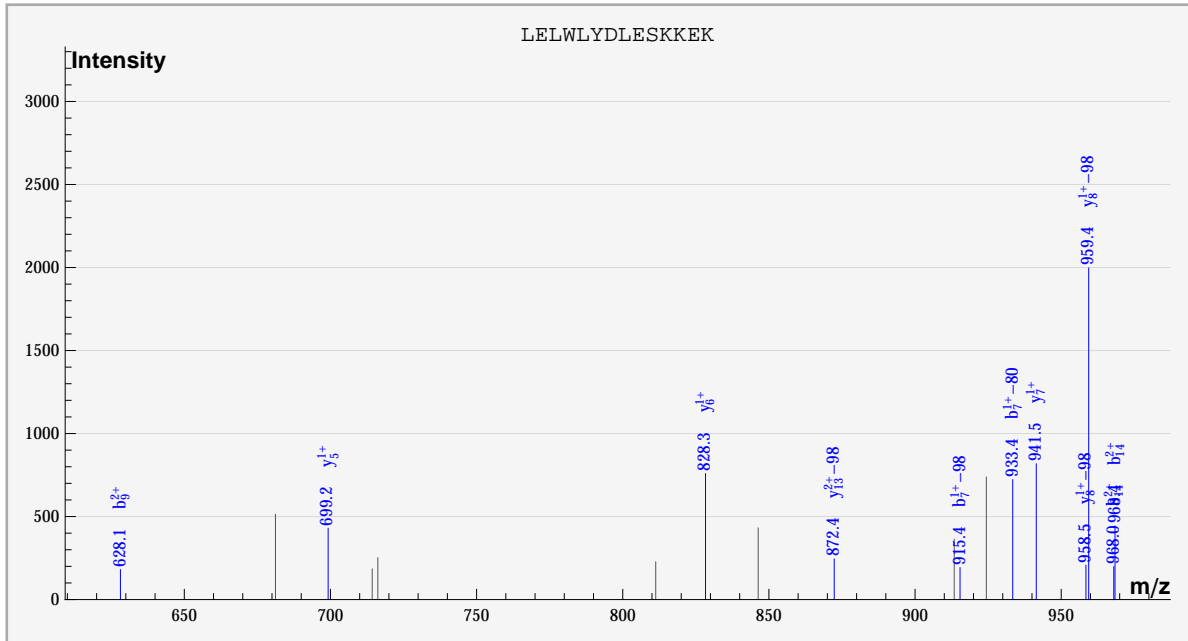

|   | #  | b | b* | #  | y | y* | P | P* |
|---|----|---|----|----|---|----|---|----|
| L | 1  |   |    |    |   |    |   |    |
| E | 2  |   |    | 13 |   | ✓  |   |    |
| L | 3  |   |    | 12 |   |    |   |    |
| W | 4  |   |    | 11 |   |    |   |    |
| L | 5  |   |    | 10 |   |    |   |    |
| Y | 6  |   |    | 9  |   |    |   |    |
| D | 7  |   | ✓  | 8  |   | ✓  |   |    |
| L | 8  |   |    | 7  |   | ✓  |   |    |
| E | 9  | ✓ |    | 6  |   | ✓  |   |    |
| S | 10 |   |    | 5  |   | ✓  |   |    |
| K | 11 |   |    | 4  |   |    |   |    |
| K | 12 |   |    | 3  |   |    |   |    |
| E | 13 |   |    | 2  |   |    |   |    |
| K | 14 | ✓ |    | 1  |   |    |   |    |

L [ E L W L Y [ D ] [ L [ E ] S K K E K ]

dbValid true EYYSKK PHOS(2) 1. 979. -1.65835 5.90084 100. ? 1614.  
 S\_Acido\_new%gi|68568117|gb|AAY81046.1| EYYSKK%:::PHOS:PHOS%:::sample\_0%compd\_329

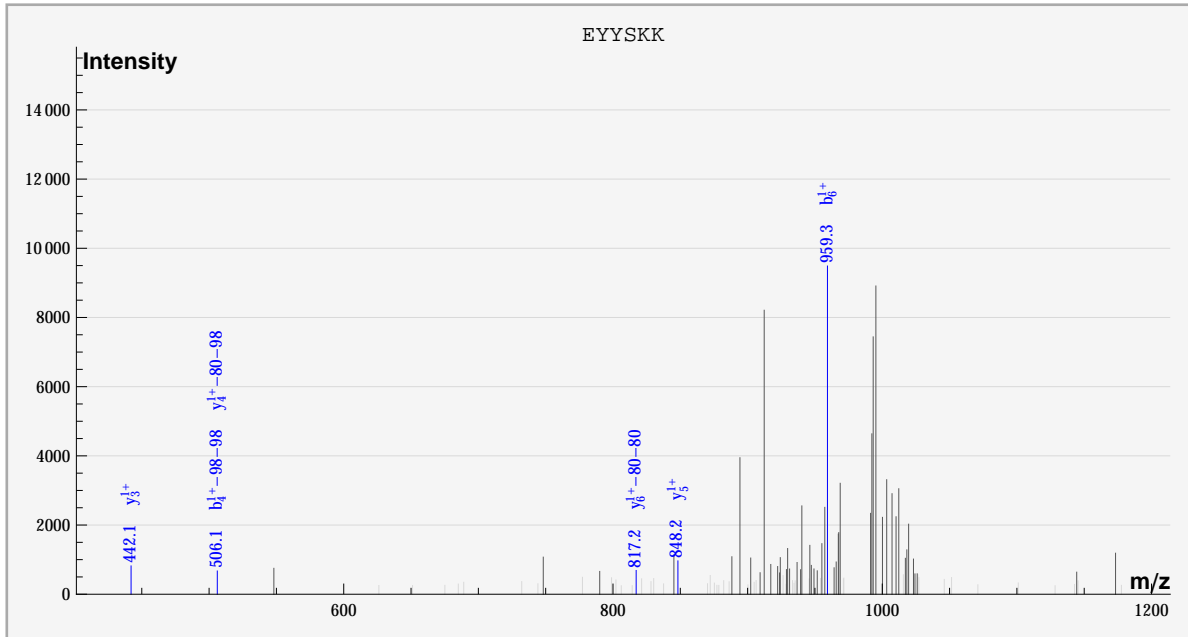

|   | # | b | b* | # | y | y* | P | P* |
|---|---|---|----|---|---|----|---|----|
| E | 1 |   |    |   |   |    |   | ✓  |
| Y | 2 |   |    | 5 | ✓ |    |   |    |
| Y | 3 |   |    | 4 |   | ✓  |   |    |
| S | 4 | ✓ |    | 3 | ✓ |    |   |    |
| K | 5 |   |    | 2 |   |    |   |    |
| K | 6 | ✓ |    | 1 |   |    |   |    |

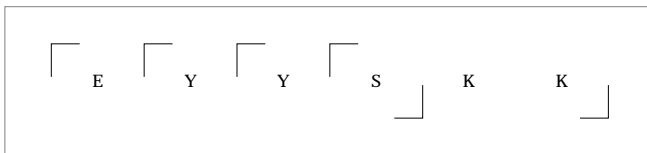



dbValid true EYYSKK PHOS(2) 1. 979. -1.65835 5.93486 100. ? 1626.  
 S\_Acido\_new%gi|68568117|gb|AAY81046.1| EYYSKK%:::PHOS:PHOS:::sample\_0%compd\_339

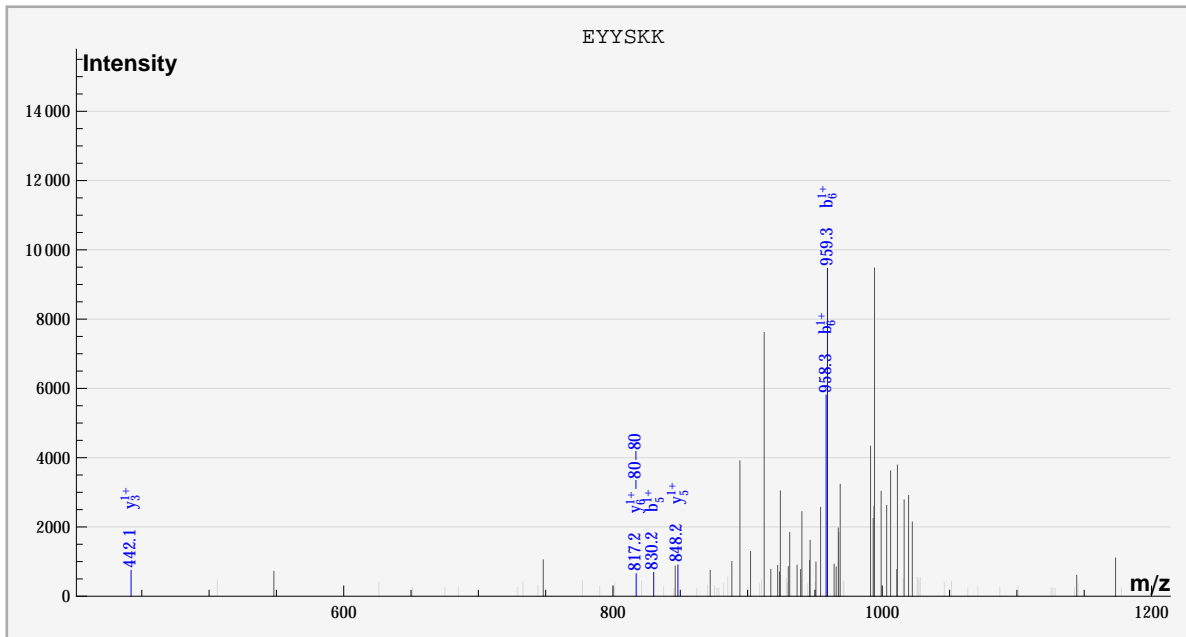

|   | # | b | b* | # | y | y* | P | P* |
|---|---|---|----|---|---|----|---|----|
| E | 1 |   |    |   |   |    |   | ✓  |
| Y | 2 |   |    | 5 | ✓ |    |   |    |
| Y | 3 |   |    | 4 |   |    |   |    |
| S | 4 |   |    | 3 | ✓ |    |   |    |
| K | 5 | ✓ |    | 2 |   |    |   |    |
| K | 6 | ✓ |    | 1 |   |    |   |    |

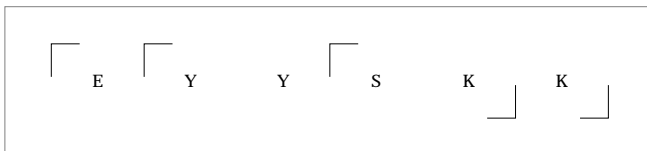

dbValid true LELWLYDLESKKEK PHOS(2) 2. 979. -1.54588 5.10943 100. ? 3102.  
 S\_Acido\_new%gi|68568658|gb|AAY81587.1| LELWLYDLESKKEK%:::::PHOS:::::PHOS:::::%sample\_1%compd\_1610

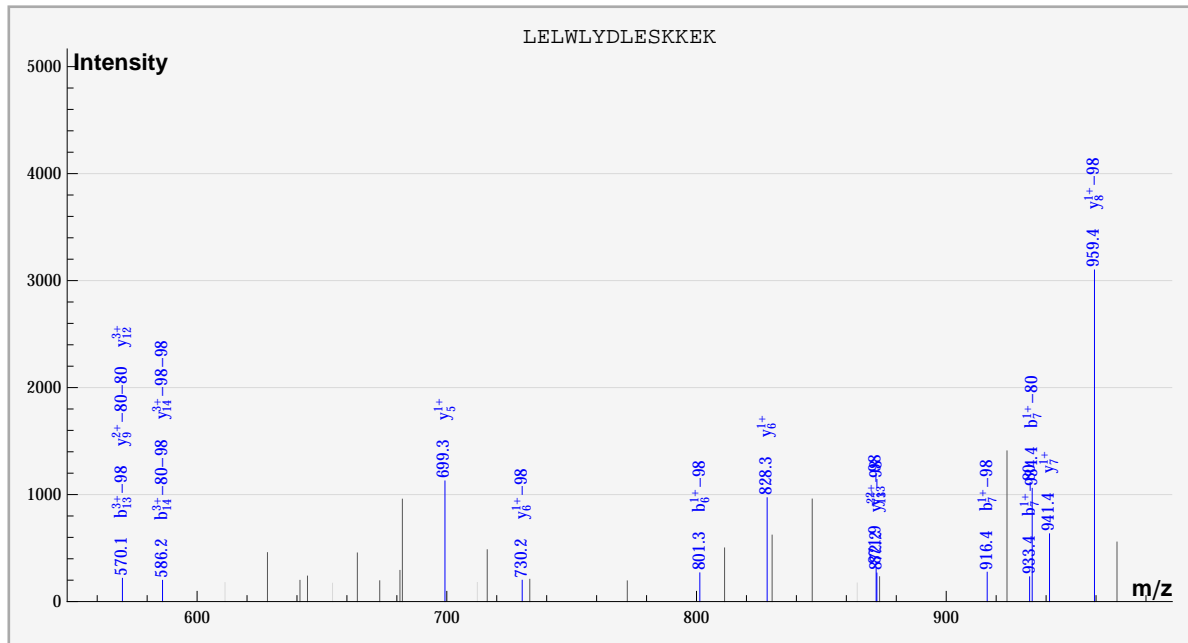

|   | #  | b | b* | #  | y | y* | P | P* |
|---|----|---|----|----|---|----|---|----|
| L | 1  |   |    |    |   |    |   | ✓  |
| E | 2  |   |    | 13 |   | ✓  |   |    |
| L | 3  |   |    | 12 | ✓ |    |   |    |
| W | 4  |   |    | 11 |   |    |   |    |
| L | 5  |   |    | 10 |   |    |   |    |
| Y | 6  | ✓ |    | 9  |   | ✓  |   |    |
| D | 7  | ✓ |    | 8  |   | ✓  |   |    |
| L | 8  |   |    | 7  | ✓ |    |   |    |
| E | 9  |   |    | 6  | ✓ | ✓  |   |    |
| S | 10 |   |    | 5  | ✓ |    |   |    |
| K | 11 |   |    | 4  |   |    |   |    |
| K | 12 |   |    | 3  |   |    |   |    |
| E | 13 | ✓ |    | 2  |   |    |   |    |
| K | 14 | ✓ |    | 1  |   |    |   |    |

「 L 「 E 「 L W L 「 Y 」 「 D 」 「 L 「 E 「 S K K E 」 K 」

dbValid true FYTTRSRAIPVIDEK PHOS(2) 2. 980. -1.54501 5.13914 100. ? 2346.

S\_Acido\_new%gi|68566702|gb|AA79631.1| FYTTRSRAIPVIDEK%::PHOS:PHOS:.....%sample\_2%cmpd\_941

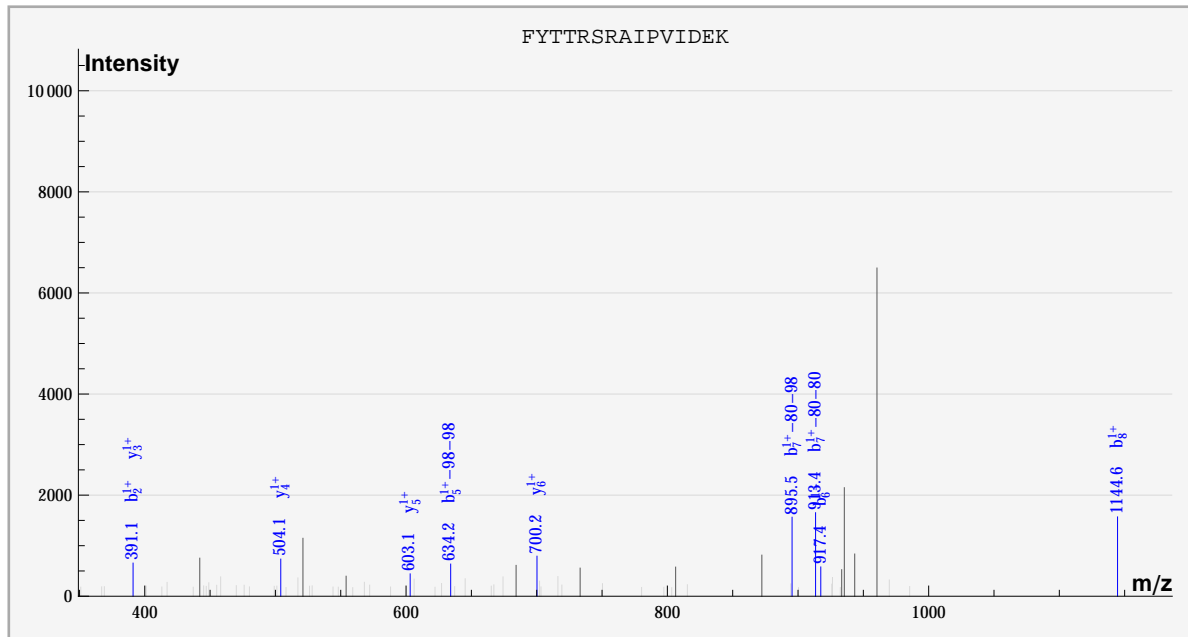

|   | #  | b | b* | #  | y | y* | P | P* |
|---|----|---|----|----|---|----|---|----|
| F | 1  |   |    |    |   |    |   |    |
| Y | 2  | ✓ |    | 14 |   |    |   |    |
| T | 3  |   |    | 13 |   |    |   |    |
| T | 4  |   |    | 12 |   |    |   |    |
| R | 5  |   | ✓  | 11 |   |    |   |    |
| S | 6  | ✓ |    | 10 |   |    |   |    |
| R | 7  |   | ✓  | 9  |   |    |   |    |
| A | 8  | ✓ |    | 8  |   |    |   |    |
| I | 9  |   |    | 7  |   |    |   |    |
| P | 10 |   |    | 6  | ✓ |    |   |    |
| V | 11 |   |    | 5  | ✓ |    |   |    |
| I | 12 |   |    | 4  | ✓ |    |   |    |
| D | 13 |   |    | 3  | ✓ |    |   |    |
| E | 14 |   |    | 2  |   |    |   |    |
| K | 15 |   |    | 1  |   |    |   |    |

F Y T T R S R A I P V I D E K

dbValid true NMYVLDK Oxidation\_M(1),PHOS(1) 1. 980. -1.59983 6.1418 100. ? 2382.  
 S\_Acido\_new%gil68567414|gb|AAY80343.1| NMYVLDK%::Oxidation\_M:PHOS:::%sample\_2%compd\_971

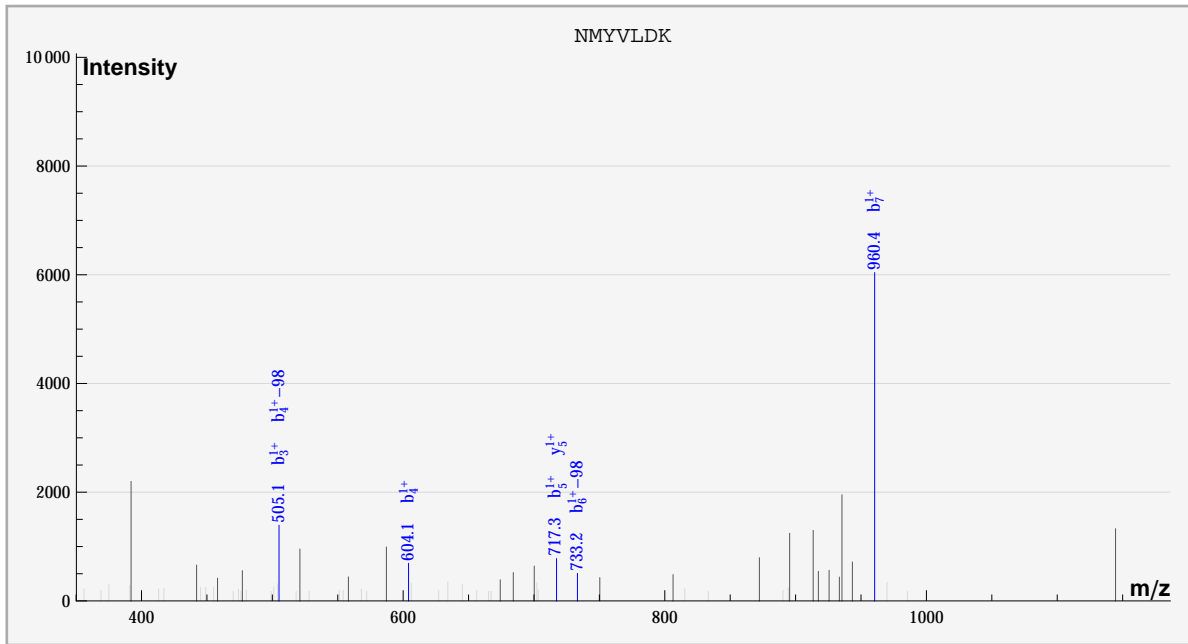

|   | # | b | b* | # | y | y* | P | P* |
|---|---|---|----|---|---|----|---|----|
| N | 1 |   |    |   |   |    |   |    |
| M | 2 |   |    | 6 |   |    |   |    |
| Y | 3 | ✓ |    | 5 | ✓ |    |   |    |
| V | 4 | ✓ | ✓  | 4 |   |    |   |    |
| L | 5 | ✓ |    | 3 |   |    |   |    |
| D | 6 |   | ✓  | 2 |   |    |   |    |
| K | 7 | ✓ |    | 1 |   |    |   |    |

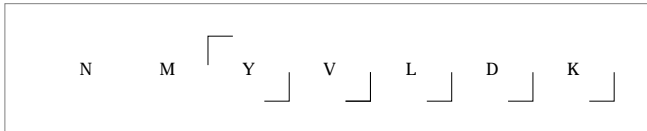

dbValid true NMYVLDK Oxidation\_M(1),PHOS(1) 1. 980. -1.59983 5.82975 100. ? 2394.  
 S\_Acido\_new%gil68567414|gb|AAY80343.1| NMYVLDK%::Oxidation\_M:PHOS:::%sample\_2%compd\_981

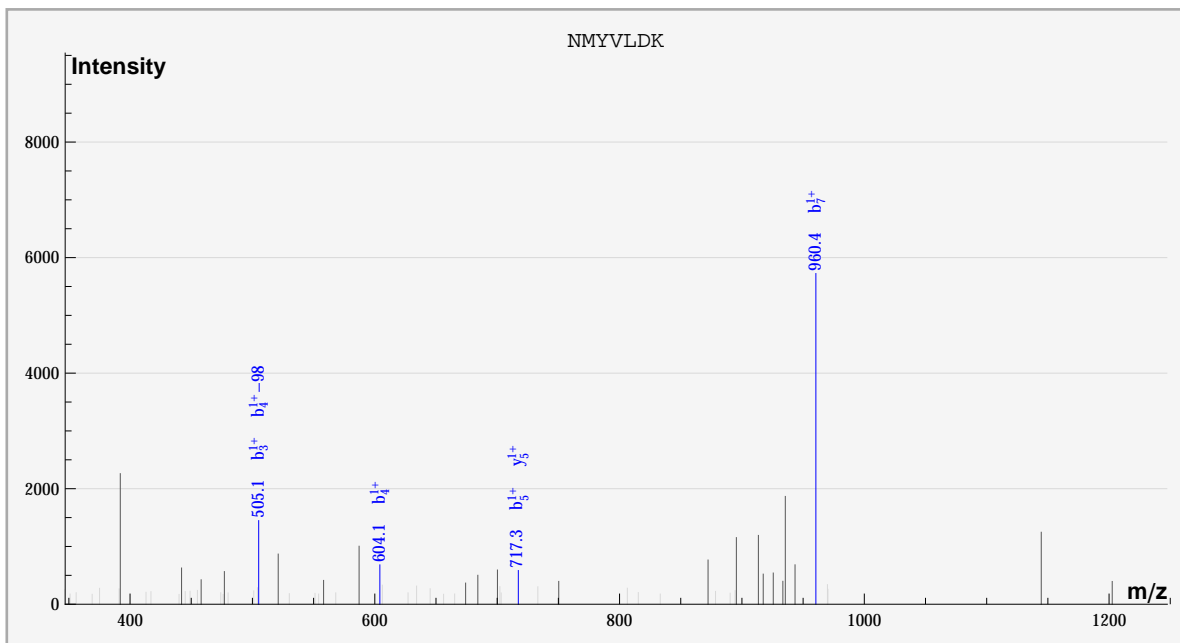

|   | # | b | b* | # | y | y* | P | P* |
|---|---|---|----|---|---|----|---|----|
| N | 1 |   |    |   |   |    |   |    |
| M | 2 |   |    | 6 |   |    |   |    |
| Y | 3 | ✓ |    | 5 | ✓ |    |   |    |
| V | 4 | ✓ | ✓  | 4 |   |    |   |    |
| L | 5 | ✓ |    | 3 |   |    |   |    |
| D | 6 |   |    | 2 |   |    |   |    |
| K | 7 | ✓ |    | 1 |   |    |   |    |

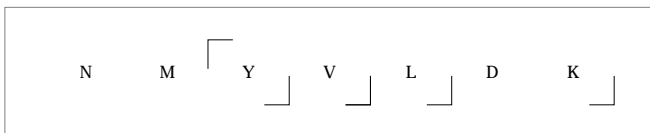

dbValid true NMYVLDK Oxidation\_M(1),PHOS(1) 1. 980. -1.59983 5.92878 100. ? 2406.  
 S\_Acido\_new%gil68567414|gb|AAY80343.1| NMYVLDK%::Oxidation\_M:PHOS:::%sample\_2%compd\_991

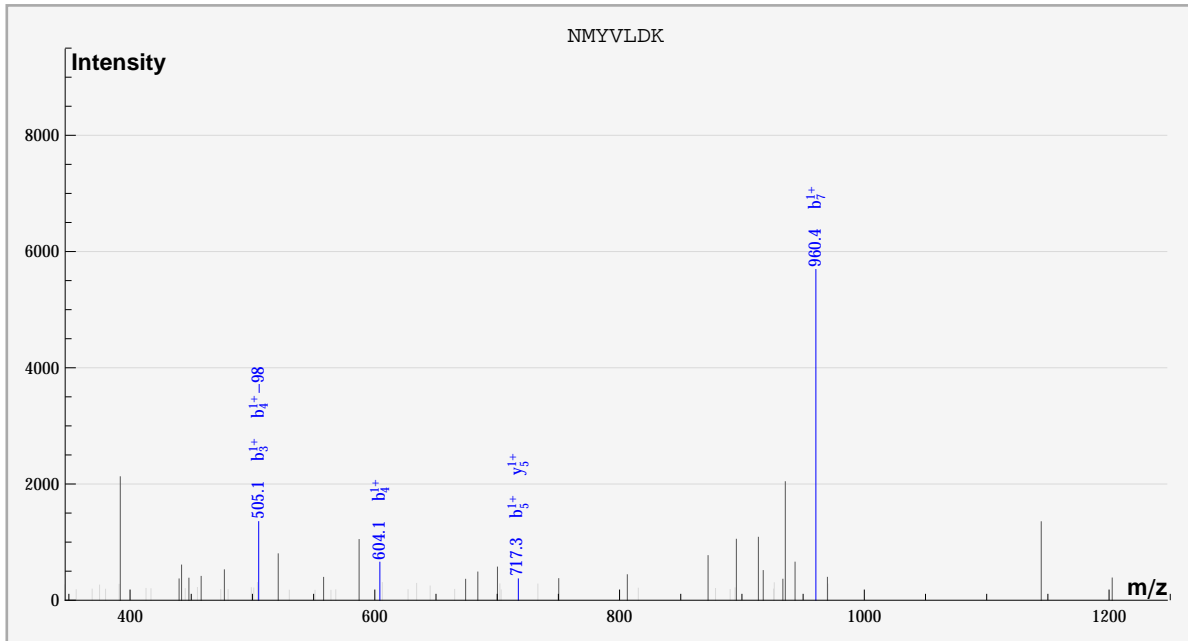

|   | # | b | b* | # | y | y* | P | P* |
|---|---|---|----|---|---|----|---|----|
| N | 1 |   |    |   |   |    |   |    |
| M | 2 |   |    | 6 |   |    |   |    |
| Y | 3 | ✓ |    | 5 | ✓ |    |   |    |
| V | 4 | ✓ | ✓  | 4 |   |    |   |    |
| L | 5 | ✓ |    | 3 |   |    |   |    |
| D | 6 |   |    | 2 |   |    |   |    |
| K | 7 | ✓ |    | 1 |   |    |   |    |

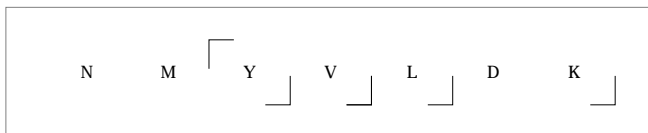

dbValid true KYYQIVSVFRYETK PHOS(2) 2. 991. 1.45446 5.19194 100. ? 3648.

S\_Acido\_new%gi|68567937|gb|AA80866.1| KYYQIVSVFRYETK%::PHOS:::PHOS:::sample\_1%compd\_2152

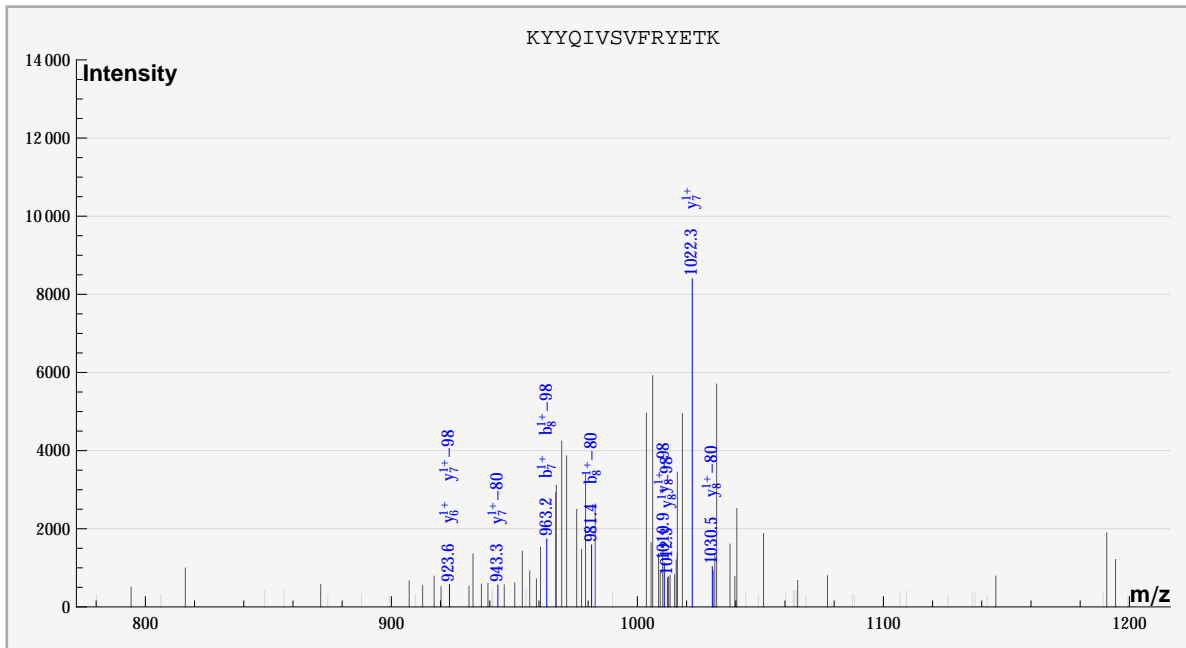

|   | #  | b | b* | #  | y | y* | P | P* |
|---|----|---|----|----|---|----|---|----|
| K | 1  |   |    |    |   |    |   |    |
| Y | 2  |   |    | 13 |   |    |   |    |
| Y | 3  |   |    | 12 |   |    |   |    |
| Q | 4  |   |    | 11 |   |    |   |    |
| I | 5  |   |    | 10 |   |    |   |    |
| V | 6  |   |    | 9  |   |    |   |    |
| S | 7  | ✓ |    | 8  |   | ✓  |   |    |
| V | 8  |   | ✓  | 7  | ✓ | ✓  |   |    |
| F | 9  |   |    | 6  | ✓ |    |   |    |
| R | 10 |   |    | 5  |   |    |   |    |
| Y | 11 |   |    | 4  |   |    |   |    |
| E | 12 |   |    | 3  |   |    |   |    |
| T | 13 |   |    | 2  |   |    |   |    |
| K | 14 |   |    | 1  |   |    |   |    |

K Y Y Q I V S V F R Y E T K

dbValid true PLDPTIKK PHOS(1) 1. 993. -1.47767 5.15701 100. ? 2202.  
 S\_Acido\_new%gi|68567539|gb|AAY80468.1| PLDPTIKK%:::PHOS:::%sample\_3%cmpd\_817

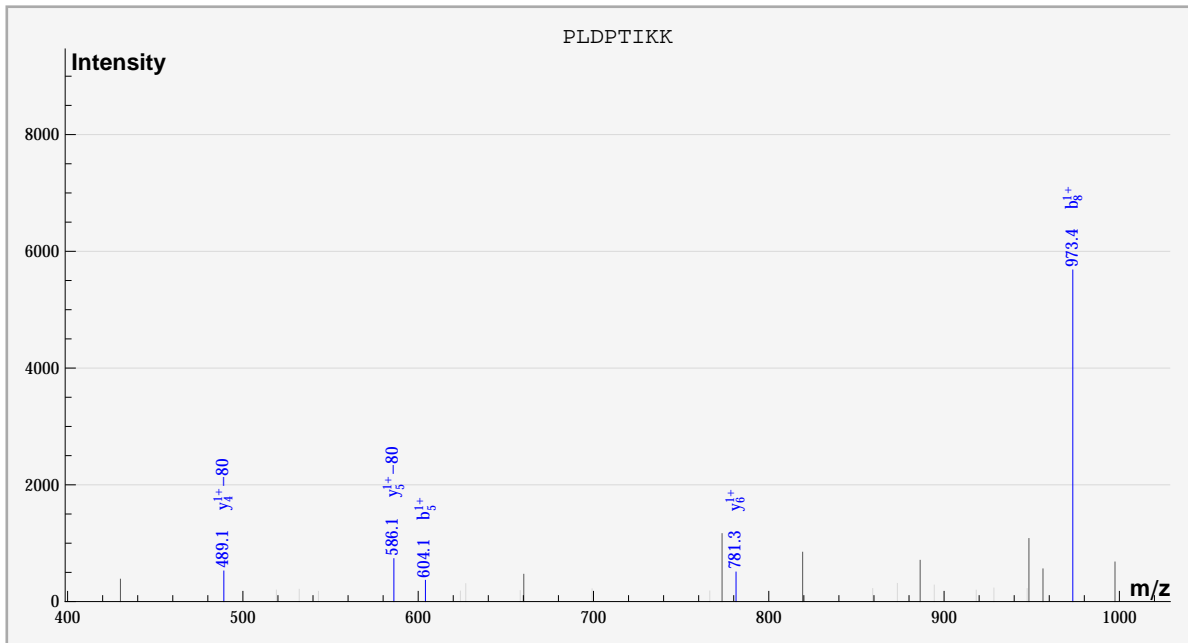

|   | # | b | b* | # | y | y* | P | P* |
|---|---|---|----|---|---|----|---|----|
| P | 1 |   |    |   |   |    |   |    |
| L | 2 |   |    | 7 |   |    |   |    |
| D | 3 |   |    | 6 | ✓ |    |   |    |
| P | 4 |   |    | 5 |   | ✓  |   |    |
| T | 5 | ✓ |    | 4 |   | ✓  |   |    |
| I | 6 |   |    | 3 |   |    |   |    |
| K | 7 |   |    | 2 |   |    |   |    |
| K | 8 | ✓ |    | 1 |   |    |   |    |

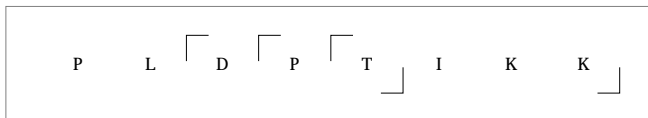



dbValid true DLEKTLAIAGVNMSIKK PHOS(2) 2. 995. 0.987802 5.36893 100. ? 2790.  
 S\_Acido\_new%gi68568394|gb|AAY81323.1| DLEKTLAIAGVNMSIKK%::::PHOS::::PHOS::::%sample\_1%compd\_1412

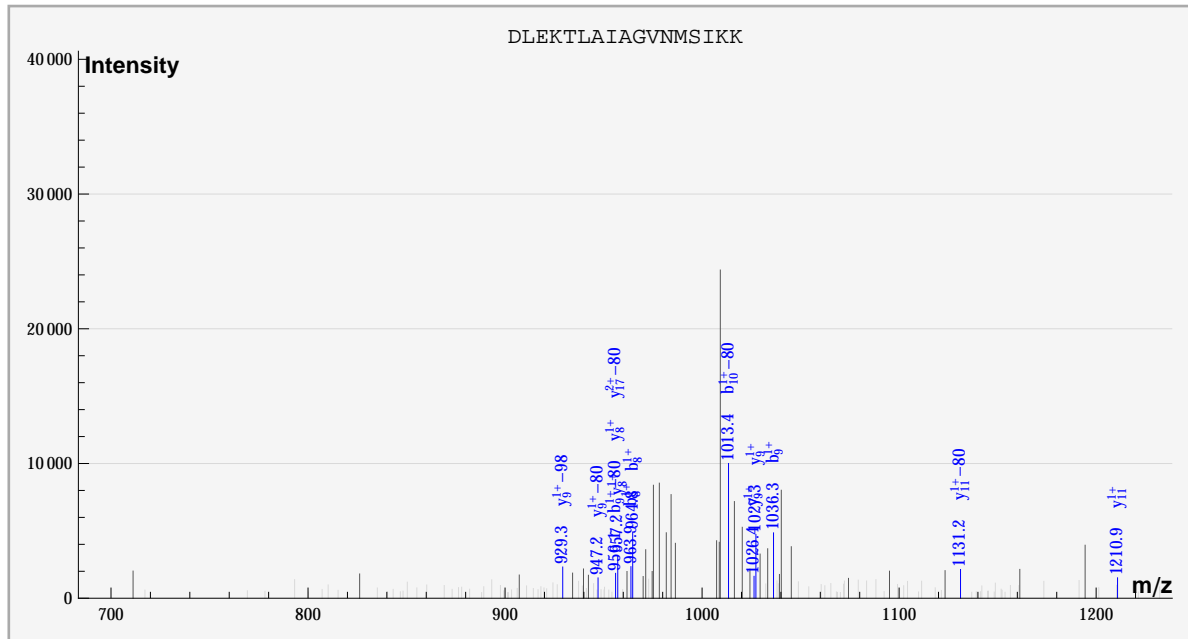

|   | #  | b | b* | #  | y | y* | P | P* |
|---|----|---|----|----|---|----|---|----|
| D | 1  |   |    |    |   |    |   | ✓  |
| L | 2  |   |    | 16 |   |    |   |    |
| E | 3  |   |    | 15 |   |    |   |    |
| K | 4  |   |    | 14 |   |    |   |    |
| T | 5  |   |    | 13 |   |    |   |    |
| L | 6  |   |    | 12 |   |    |   |    |
| A | 7  |   |    | 11 | ✓ | ✓  |   |    |
| I | 8  | ✓ |    | 10 |   |    |   |    |
| A | 9  | ✓ | ✓  | 9  | ✓ | ✓  |   |    |
| G | 10 |   | ✓  | 8  | ✓ |    |   |    |
| V | 11 |   |    | 7  |   |    |   |    |
| N | 12 |   |    | 6  |   |    |   |    |
| M | 13 |   |    | 5  |   |    |   |    |
| S | 14 |   |    | 4  |   |    |   |    |
| I | 15 |   |    | 3  |   |    |   |    |
| K | 16 |   |    | 2  |   |    |   |    |
| K | 17 |   |    | 1  |   |    |   |    |

[D L E K T L [A I ] [A ] [G ] V N M S I K K
